# Supplementary material
Source: publisher figshare collection journal article supplement (https://springernature.figshare.com/ndownloader/files/17562821)
Supplement: Supplementary file 1 [file 17562821]

Archive with 100 entries (100 files):
- CytoscapeSession-2018_09_25-21_15/3.0.0.version
- CytoscapeSession-2018_09_25-21_15/networks/21506-STG%2C+Model+3.xgmml
- CytoscapeSession-2018_09_25-21_15/networks/37956-STG%2C+Model+1.xgmml
- CytoscapeSession-2018_09_25-21_15/networks/14312-STG%2C+Model+1%2C+Fluctuating+Inputs.xgmml
- CytoscapeSession-2018_09_25-21_15/networks/26652-STG%2C+Model+2.xgmml
- CytoscapeSession-2018_09_25-21_15/networks/9166-STG%2C+Model+4.xgmml
- CytoscapeSession-2018_09_25-21_15/views/21522-54743-STG%2C+Model+3.xgmml
- CytoscapeSession-2018_09_25-21_15/views/26668-68457-STG%2C+Model+2.xgmml
- CytoscapeSession-2018_09_25-21_15/views/37972-73579-STG%2C+Model+1.xgmml
- CytoscapeSession-2018_09_25-21_15/views/14328-47573-STG%2C+Model+1%2C+Fluctuating+Inputs.xgmml
- CytoscapeSession-2018_09_25-21_15/views/9182-80115-STG%2C+Model+4.xgmml
- CytoscapeSession-2018_09_25-21_15/tables/26652-STG%2C+Model+2/LOCAL_ATTRS-org.cytoscape.model.CyNode-STG%2C+Model+2+root+default++node.cytable
- CytoscapeSession-2018_09_25-21_15/tables/21522-STG%2C+Model+3/LOCAL_ATTRS-org.cytoscape.model.CyNetwork-STG%2C+Model+3+default++network.cytable
- CytoscapeSession-2018_09_25-21_15/tables/21506-STG%2C+Model+3/LOCAL_ATTRS-org.cytoscape.model.CyNetwork-STG%2C+Model+3+root+default++network.cytable
- CytoscapeSession-2018_09_25-21_15/tables/14328-STG%2C+Model+1%2C+Fluctuating+Inputs/LOCAL_ATTRS-org.cytoscape.model.CyNetwork-STG%2C+Model+1%2C+Fluctuating+Inputs+default++network.cytable
- CytoscapeSession-2018_09_25-21_15/tables/9166-STG%2C+Model+4/LOCAL_ATTRS-org.cytoscape.model.CyNetwork-STG%2C+Model+4+root+default++network.cytable
- CytoscapeSession-2018_09_25-21_15/tables/26668-STG%2C+Model+2/HIDDEN-org.cytoscape.model.CyEdge-26668+hidden+edge.cytable
- CytoscapeSession-2018_09_25-21_15/tables/21522-STG%2C+Model+3/HIDDEN-org.cytoscape.model.CyEdge-21522+hidden+edge.cytable
- CytoscapeSession-2018_09_25-21_15/tables/9166-STG%2C+Model+4/SHARED_ATTRS-org.cytoscape.model.CyEdge-STG%2C+Model+4+root+shared++edge.cytable
- CytoscapeSession-2018_09_25-21_15/tables/21506-STG%2C+Model+3/LOCAL_ATTRS-org.cytoscape.model.CyEdge-STG%2C+Model+3+root+default++edge.cytable
- CytoscapeSession-2018_09_25-21_15/tables/37956-STG%2C+Model+1/HIDDEN-org.cytoscape.model.CyNode-37956+hidden+node.cytable
- CytoscapeSession-2018_09_25-21_15/tables/9182-STG%2C+Model+4/LOCAL_ATTRS-org.cytoscape.model.CyNetwork-STG%2C+Model+4+default++network.cytable
- CytoscapeSession-2018_09_25-21_15/tables/9166-STG%2C+Model+4/HIDDEN-org.cytoscape.model.CyNode-9166+hidden+node.cytable
- CytoscapeSession-2018_09_25-21_15/tables/21506-STG%2C+Model+3/LOCAL_ATTRS-org.cytoscape.model.CyNode-STG%2C+Model+3+root+default++node.cytable
- CytoscapeSession-2018_09_25-21_15/tables/37972-STG%2C+Model+1/LOCAL_ATTRS-org.cytoscape.model.CyNode-STG%2C+Model+1+default++node.cytable
- CytoscapeSession-2018_09_25-21_15/tables/14312-STG%2C+Model+1%2C+Fluctuating+Inputs/SHARED_ATTRS-org.cytoscape.model.CyNetwork-STG%2C+Model+1%2C+Fluctuating+Inputs+root+shared++network.cytable
- CytoscapeSession-2018_09_25-21_15/tables/9166-STG%2C+Model+4/HIDDEN-org.cytoscape.model.CyEdge-9166+hidden+edge.cytable
- CytoscapeSession-2018_09_25-21_15/tables/26652-STG%2C+Model+2/SHARED_ATTRS-org.cytoscape.model.CyEdge-STG%2C+Model+2+root+shared++edge.cytable
- CytoscapeSession-2018_09_25-21_15/tables/26652-STG%2C+Model+2/SHARED_ATTRS-org.cytoscape.model.CyNetwork-STG%2C+Model+2+root+shared++network.cytable
- CytoscapeSession-2018_09_25-21_15/tables/37956-STG%2C+Model+1/LOCAL_ATTRS-org.cytoscape.model.CyNode-STG%2C+Model+1+root+default++node.cytable
- CytoscapeSession-2018_09_25-21_15/tables/14328-STG%2C+Model+1%2C+Fluctuating+Inputs/HIDDEN-org.cytoscape.model.CyNetwork-14328+hidden+network.cytable
- CytoscapeSession-2018_09_25-21_15/tables/9182-STG%2C+Model+4/LOCAL_ATTRS-org.cytoscape.model.CyNode-STG%2C+Model+4+default++node.cytable
- CytoscapeSession-2018_09_25-21_15/tables/37956-STG%2C+Model+1/HIDDEN-org.cytoscape.model.CyEdge-37956+hidden+edge.cytable
- CytoscapeSession-2018_09_25-21_15/tables/9166-STG%2C+Model+4/HIDDEN-org.cytoscape.model.CyNetwork-9166+hidden+network.cytable
- CytoscapeSession-2018_09_25-21_15/tables/37972-STG%2C+Model+1/LOCAL_ATTRS-org.cytoscape.model.CyEdge-STG%2C+Model+1+default++edge.cytable
- CytoscapeSession-2018_09_25-21_15/tables/21522-STG%2C+Model+3/HIDDEN-org.cytoscape.model.CyNode-21522+hidden+node.cytable
- CytoscapeSession-2018_09_25-21_15/tables/9182-STG%2C+Model+4/LOCAL_ATTRS-org.cytoscape.model.CyEdge-STG%2C+Model+4+default++edge.cytable
- CytoscapeSession-2018_09_25-21_15/tables/21522-STG%2C+Model+3/HIDDEN-org.cytoscape.model.CyNetwork-21522+hidden+network.cytable
- CytoscapeSession-2018_09_25-21_15/tables/21506-STG%2C+Model+3/SHARED_ATTRS-org.cytoscape.model.CyEdge-STG%2C+Model+3+root+shared++edge.cytable
- CytoscapeSession-2018_09_25-21_15/tables/9166-STG%2C+Model+4/LOCAL_ATTRS-org.cytoscape.model.CyNode-STG%2C+Model+4+root+default++node.cytable
- CytoscapeSession-2018_09_25-21_15/tables/26668-STG%2C+Model+2/HIDDEN-org.cytoscape.model.CyNetwork-26668+hidden+network.cytable
- CytoscapeSession-2018_09_25-21_15/tables/9182-STG%2C+Model+4/HIDDEN-org.cytoscape.model.CyNetwork-9182+hidden+network.cytable
- CytoscapeSession-2018_09_25-21_15/tables/37956-STG%2C+Model+1/LOCAL_ATTRS-org.cytoscape.model.CyEdge-STG%2C+Model+1+root+default++edge.cytable
- CytoscapeSession-2018_09_25-21_15/tables/26668-STG%2C+Model+2/LOCAL_ATTRS-org.cytoscape.model.CyEdge-STG%2C+Model+2+default++edge.cytable
- CytoscapeSession-2018_09_25-21_15/tables/37972-STG%2C+Model+1/HIDDEN-org.cytoscape.model.CyEdge-37972+hidden+edge.cytable
- CytoscapeSession-2018_09_25-21_15/tables/37972-STG%2C+Model+1/LOCAL_ATTRS-org.cytoscape.model.CyNetwork-STG%2C+Model+1+default++network.cytable
- CytoscapeSession-2018_09_25-21_15/tables/37972-STG%2C+Model+1/HIDDEN-org.cytoscape.model.CyNode-37972+hidden+node.cytable
- CytoscapeSession-2018_09_25-21_15/tables/26668-STG%2C+Model+2/HIDDEN-org.cytoscape.model.CyNode-26668+hidden+node.cytable
- CytoscapeSession-2018_09_25-21_15/tables/37956-STG%2C+Model+1/LOCAL_ATTRS-org.cytoscape.model.CyNetwork-STG%2C+Model+1+root+default++network.cytable
- CytoscapeSession-2018_09_25-21_15/tables/37956-STG%2C+Model+1/SHARED_ATTRS-org.cytoscape.model.CyNetwork-STG%2C+Model+1+root+shared++network.cytable
- CytoscapeSession-2018_09_25-21_15/tables/26668-STG%2C+Model+2/LOCAL_ATTRS-org.cytoscape.model.CyNode-STG%2C+Model+2+default++node.cytable
- CytoscapeSession-2018_09_25-21_15/tables/14312-STG%2C+Model+1%2C+Fluctuating+Inputs/LOCAL_ATTRS-org.cytoscape.model.CyNode-STG%2C+Model+1%2C+Fluctuating+Inputs+root+default++node.cytable
- CytoscapeSession-2018_09_25-21_15/tables/14328-STG%2C+Model+1%2C+Fluctuating+Inputs/LOCAL_ATTRS-org.cytoscape.model.CyEdge-STG%2C+Model+1%2C+Fluctuating+Inputs+default++edge.cytable
- CytoscapeSession-2018_09_25-21_15/tables/21522-STG%2C+Model+3/LOCAL_ATTRS-org.cytoscape.model.CyNode-STG%2C+Model+3+default++node.cytable
- CytoscapeSession-2018_09_25-21_15/tables/26652-STG%2C+Model+2/HIDDEN-org.cytoscape.model.CyEdge-26652+hidden+edge.cytable
- CytoscapeSession-2018_09_25-21_15/tables/37956-STG%2C+Model+1/HIDDEN-org.cytoscape.model.CyNetwork-37956+hidden+network.cytable
- CytoscapeSession-2018_09_25-21_15/tables/37956-STG%2C+Model+1/SHARED_ATTRS-org.cytoscape.model.CyNode-STG%2C+Model+1+root+shared++node.cytable
- CytoscapeSession-2018_09_25-21_15/tables/9182-STG%2C+Model+4/HIDDEN-org.cytoscape.model.CyEdge-9182+hidden+edge.cytable
- CytoscapeSession-2018_09_25-21_15/tables/26652-STG%2C+Model+2/HIDDEN-org.cytoscape.model.CyNode-26652+hidden+node.cytable
- CytoscapeSession-2018_09_25-21_15/tables/9182-STG%2C+Model+4/HIDDEN-org.cytoscape.model.CyNode-9182+hidden+node.cytable
- CytoscapeSession-2018_09_25-21_15/tables/21506-STG%2C+Model+3/HIDDEN-org.cytoscape.model.CyNetwork-21506+hidden+network.cytable
- CytoscapeSession-2018_09_25-21_15/tables/37956-STG%2C+Model+1/SHARED_ATTRS-org.cytoscape.model.CyEdge-STG%2C+Model+1+root+shared++edge.cytable
- CytoscapeSession-2018_09_25-21_15/tables/9166-STG%2C+Model+4/SHARED_ATTRS-org.cytoscape.model.CyNode-STG%2C+Model+4+root+shared++node.cytable
- CytoscapeSession-2018_09_25-21_15/tables/21522-STG%2C+Model+3/LOCAL_ATTRS-org.cytoscape.model.CyEdge-STG%2C+Model+3+default++edge.cytable
- CytoscapeSession-2018_09_25-21_15/tables/21506-STG%2C+Model+3/HIDDEN-org.cytoscape.model.CyEdge-21506+hidden+edge.cytable
- CytoscapeSession-2018_09_25-21_15/tables/26652-STG%2C+Model+2/LOCAL_ATTRS-org.cytoscape.model.CyNetwork-STG%2C+Model+2+root+default++network.cytable
- CytoscapeSession-2018_09_25-21_15/tables/14312-STG%2C+Model+1%2C+Fluctuating+Inputs/LOCAL_ATTRS-org.cytoscape.model.CyNetwork-STG%2C+Model+1%2C+Fluctuating+Inputs+root+default++network.cytable
- CytoscapeSession-2018_09_25-21_15/tables/26652-STG%2C+Model+2/HIDDEN-org.cytoscape.model.CyNetwork-26652+hidden+network.cytable
- CytoscapeSession-2018_09_25-21_15/tables/9166-STG%2C+Model+4/LOCAL_ATTRS-org.cytoscape.model.CyEdge-STG%2C+Model+4+root+default++edge.cytable
- CytoscapeSession-2018_09_25-21_15/tables/21506-STG%2C+Model+3/SHARED_ATTRS-org.cytoscape.model.CyNetwork-STG%2C+Model+3+root+shared++network.cytable
- CytoscapeSession-2018_09_25-21_15/tables/21506-STG%2C+Model+3/HIDDEN-org.cytoscape.model.CyNode-21506+hidden+node.cytable
- CytoscapeSession-2018_09_25-21_15/tables/14312-STG%2C+Model+1%2C+Fluctuating+Inputs/HIDDEN-org.cytoscape.model.CyNode-14312+hidden+node.cytable
- CytoscapeSession-2018_09_25-21_15/tables/26652-STG%2C+Model+2/SHARED_ATTRS-org.cytoscape.model.CyNode-STG%2C+Model+2+root+shared++node.cytable
- CytoscapeSession-2018_09_25-21_15/tables/26652-STG%2C+Model+2/LOCAL_ATTRS-org.cytoscape.model.CyEdge-STG%2C+Model+2+root+default++edge.cytable
- CytoscapeSession-2018_09_25-21_15/tables/14312-STG%2C+Model+1%2C+Fluctuating+Inputs/HIDDEN-org.cytoscape.model.CyNetwork-14312+hidden+network.cytable
- CytoscapeSession-2018_09_25-21_15/tables/37972-STG%2C+Model+1/HIDDEN-org.cytoscape.model.CyNetwork-37972+hidden+network.cytable
- CytoscapeSession-2018_09_25-21_15/tables/9166-STG%2C+Model+4/SHARED_ATTRS-org.cytoscape.model.CyNetwork-STG%2C+Model+4+root+shared++network.cytable
- CytoscapeSession-2018_09_25-21_15/tables/14312-STG%2C+Model+1%2C+Fluctuating+Inputs/SHARED_ATTRS-org.cytoscape.model.CyEdge-STG%2C+Model+1%2C+Fluctuating+Inputs+root+shared++edge.cytable
- CytoscapeSession-2018_09_25-21_15/tables/14328-STG%2C+Model+1%2C+Fluctuating+Inputs/LOCAL_ATTRS-org.cytoscape.model.CyNode-STG%2C+Model+1%2C+Fluctuating+Inputs+default++node.cytable
- CytoscapeSession-2018_09_25-21_15/tables/14328-STG%2C+Model+1%2C+Fluctuating+Inputs/HIDDEN-org.cytoscape.model.CyNode-14328+hidden+node.cytable
- CytoscapeSession-2018_09_25-21_15/tables/26668-STG%2C+Model+2/LOCAL_ATTRS-org.cytoscape.model.CyNetwork-STG%2C+Model+2+default++network.cytable
- CytoscapeSession-2018_09_25-21_15/tables/21506-STG%2C+Model+3/SHARED_ATTRS-org.cytoscape.model.CyNode-STG%2C+Model+3+root+shared++node.cytable
- CytoscapeSession-2018_09_25-21_15/tables/14312-STG%2C+Model+1%2C+Fluctuating+Inputs/LOCAL_ATTRS-org.cytoscape.model.CyEdge-STG%2C+Model+1%2C+Fluctuating+Inputs+root+default++edge.cytable
- CytoscapeSession-2018_09_25-21_15/tables/14312-STG%2C+Model+1%2C+Fluctuating+Inputs/SHARED_ATTRS-org.cytoscape.model.CyNode-STG%2C+Model+1%2C+Fluctuating+Inputs+root+shared++node.cytable
- CytoscapeSession-2018_09_25-21_15/tables/14328-STG%2C+Model+1%2C+Fluctuating+Inputs/HIDDEN-org.cytoscape.model.CyEdge-14328+hidden+edge.cytable
- CytoscapeSession-2018_09_25-21_15/tables/14312-STG%2C+Model+1%2C+Fluctuating+Inputs/HIDDEN-org.cytoscape.model.CyEdge-14312+hidden+edge.cytable
- CytoscapeSession-2018_09_25-21_15/tables/cytables.xml
- CytoscapeSession-2018_09_25-21_15/session_vizmap.xml
- CytoscapeSession-2018_09_25-21_15/properties/groupSettings.props
- CytoscapeSession-2018_09_25-21_15/properties/session_bookmarks.xml
- CytoscapeSession-2018_09_25-21_15/session_thumbnail.png
- CytoscapeSession-2018_09_25-21_15/apps/org.cytoscape.ding.customgraphicsmgr/image_metadata.props
- CytoscapeSession-2018_09_25-21_15/apps/org.cytoscape.swing-application/session_state.xml
- CytoscapeSession-2018_09_25-21_15/apps/org.cytoscape.swing-application/network_list.xml
- CytoscapeSession-2018_09_25-21_15/apps/org.cytoscape.filter/filters.json
- CytoscapeSession-2018_09_25-21_15/apps/org.cytoscape.filter/filterChains.json
- CytoscapeSession-2018_09_25-21_15/apps/org.cytoscape.browser/UnassignedTables.props
- CytoscapeSession-2018_09_25-21_15/apps/org.cytoscape.browser/NetworkTable.props
- CytoscapeSession-2018_09_25-21_15/apps/org.cytoscape.browser/EdgeTable.props
- CytoscapeSession-2018_09_25-21_15/apps/org.cytoscape.browser/NodeTable.props
