# Supplementary material
Source: publisher figshare collection journal article supplement (https://springernature.figshare.com/ndownloader/files/17562821)
Supplement: Supplementary file 1 [file 17562821 › CytoscapeSession-2018_09_25-21_15/apps/org.cytoscape.browser/EdgeTable.props]

STG, Model 4 default  edge,0,SUID,false
STG, Model 4 default  edge,1,selected,false
STG, Model 4 default  edge,2,shared name,true
STG, Model 4 default  edge,3,shared interaction,true
STG, Model 4 default  edge,4,name,true
STG, Model 4 default  edge,5,interaction,true
STG, Model 1, Fluctuating Inputs default  edge,0,SUID,false
STG, Model 1, Fluctuating Inputs default  edge,1,selected,false
STG, Model 1, Fluctuating Inputs default  edge,2,shared name,true
STG, Model 1, Fluctuating Inputs default  edge,3,shared interaction,true
STG, Model 1, Fluctuating Inputs default  edge,4,name,true
STG, Model 1, Fluctuating Inputs default  edge,5,interaction,true
STG, Model 1, Fluctuating Inputs default  edge,6,EdgeBetweenness,true
STG, Model 3 default  edge,0,SUID,false
STG, Model 3 default  edge,1,selected,false
STG, Model 3 default  edge,2,shared name,true
STG, Model 3 default  edge,3,shared interaction,true
STG, Model 3 default  edge,4,name,true
STG, Model 3 default  edge,5,interaction,true
STG, Model 1 default  edge,0,SUID,false
STG, Model 1 default  edge,1,selected,false
STG, Model 1 default  edge,2,shared name,true
STG, Model 1 default  edge,3,shared interaction,true
STG, Model 1 default  edge,4,name,true
STG, Model 1 default  edge,5,interaction,true
STG, Model 1 default  edge,6,EdgeBetweenness,true
STG, Model 2 default  edge,0,SUID,false
STG, Model 2 default  edge,1,selected,false
STG, Model 2 default  edge,2,shared name,true
STG, Model 2 default  edge,3,shared interaction,true
STG, Model 2 default  edge,4,name,true
STG, Model 2 default  edge,5,interaction,true
