# Supplementary material
Source: publisher figshare collection journal article supplement (https://springernature.figshare.com/ndownloader/files/17562821)
Supplement: Supplementary file 1 [file 17562821 › CytoscapeSession-2018_09_25-21_15/apps/org.cytoscape.browser/NetworkTable.props]

STG, Model 2 default  network,0,SUID,false
STG, Model 2 default  network,1,selected,false
STG, Model 2 default  network,2,shared name,true
STG, Model 2 default  network,3,name,true
STG, Model 2 default  network,4,__Annotations,true
STG, Model 1, Fluctuating Inputs default  network,0,SUID,false
STG, Model 1, Fluctuating Inputs default  network,1,selected,false
STG, Model 1, Fluctuating Inputs default  network,2,shared name,true
STG, Model 1, Fluctuating Inputs default  network,3,name,true
STG, Model 1, Fluctuating Inputs default  network,4,__Annotations,true
STG, Model 1, Fluctuating Inputs default  network,5,SumInformationLoss,true
STG, Model 1, Fluctuating Inputs default  network,6,NormalizedSumInformationLoss,true
STG, Model 4 default  network,0,SUID,false
STG, Model 4 default  network,1,selected,false
STG, Model 4 default  network,2,shared name,true
STG, Model 4 default  network,3,name,true
STG, Model 4 default  network,4,__Annotations,true
STG, Model 1 default  network,0,SUID,false
STG, Model 1 default  network,1,selected,false
STG, Model 1 default  network,2,shared name,true
STG, Model 1 default  network,3,name,true
STG, Model 1 default  network,4,__Annotations,true
STG, Model 3 default  network,0,SUID,false
STG, Model 3 default  network,1,selected,false
STG, Model 3 default  network,2,shared name,true
STG, Model 3 default  network,3,name,true
STG, Model 3 default  network,4,__Annotations,true
