# Supplementary material
Source: publisher figshare collection journal article supplement (https://springernature.figshare.com/ndownloader/files/17562821)
Supplement: Supplementary file 1 [file 17562821 › CytoscapeSession-2018_09_25-21_15/apps/org.cytoscape.browser/NodeTable.props]

STG, Model 1, Fluctuating Inputs default  node,0,SUID,false
STG, Model 1, Fluctuating Inputs default  node,1,selected,false
STG, Model 1, Fluctuating Inputs default  node,2,shared name,true
STG, Model 1, Fluctuating Inputs default  node,3,name,true
STG, Model 1, Fluctuating Inputs default  node,4,AverageShortestPathLength,true
STG, Model 1, Fluctuating Inputs default  node,5,BetweennessCentrality,true
STG, Model 1, Fluctuating Inputs default  node,6,ClosenessCentrality,true
STG, Model 1, Fluctuating Inputs default  node,7,ClusteringCoefficient,true
STG, Model 1, Fluctuating Inputs default  node,8,Eccentricity,true
STG, Model 1, Fluctuating Inputs default  node,9,EdgeCount,true
STG, Model 1, Fluctuating Inputs default  node,10,Indegree,true
STG, Model 1, Fluctuating Inputs default  node,11,IsSingleNode,true
STG, Model 1, Fluctuating Inputs default  node,12,NeighborhoodConnectivity,true
STG, Model 1, Fluctuating Inputs default  node,13,Outdegree,true
STG, Model 1, Fluctuating Inputs default  node,14,PartnerOfMultiEdgedNodePairs,true
STG, Model 1, Fluctuating Inputs default  node,15,SelfLoops,true
STG, Model 1, Fluctuating Inputs default  node,16,Stress,true
STG, Model 1, Fluctuating Inputs default  node,17,Glucose,true
STG, Model 1, Fluctuating Inputs default  node,18,Pyruvate,true
STG, Model 1, Fluctuating Inputs default  node,19,PDK,true
STG, Model 1, Fluctuating Inputs default  node,20,PDC,true
STG, Model 1, Fluctuating Inputs default  node,21,AcetylCoA,true
STG, Model 1, Fluctuating Inputs default  node,22,Citrate,true
STG, Model 1, Fluctuating Inputs default  node,23,MalonylCoA,true
STG, Model 1, Fluctuating Inputs default  node,24,FattyAcids,true
STG, Model 1, Fluctuating Inputs default  node,25,AMPK,true
STG, Model 1, Fluctuating Inputs default  node,26,CircFA,true
STG, Model 1, Fluctuating Inputs default  node,27,relEntX,true
STG, Model 1, Fluctuating Inputs default  node,28,relEntY,true
STG, Model 1, Fluctuating Inputs default  node,29,relEntW,true
STG, Model 1, Fluctuating Inputs default  node,30,relEntH,true
STG, Model 3 default  node,0,SUID,false
STG, Model 3 default  node,1,selected,false
STG, Model 3 default  node,2,shared name,true
STG, Model 3 default  node,3,name,true
STG, Model 2 default  node,0,SUID,false
STG, Model 2 default  node,1,selected,false
STG, Model 2 default  node,2,shared name,true
STG, Model 2 default  node,3,name,true
STG, Model 4 default  node,0,SUID,false
STG, Model 4 default  node,1,selected,false
STG, Model 4 default  node,2,shared name,true
STG, Model 4 default  node,3,name,true
STG, Model 1 default  node,0,SUID,false
STG, Model 1 default  node,1,selected,false
STG, Model 1 default  node,2,shared name,true
STG, Model 1 default  node,3,name,true
STG, Model 1 default  node,4,AverageShortestPathLength,true
STG, Model 1 default  node,5,BetweennessCentrality,true
STG, Model 1 default  node,6,ClosenessCentrality,true
STG, Model 1 default  node,7,ClusteringCoefficient,true
STG, Model 1 default  node,8,Eccentricity,true
STG, Model 1 default  node,9,EdgeCount,true
STG, Model 1 default  node,10,Indegree,true
STG, Model 1 default  node,11,IsSingleNode,true
STG, Model 1 default  node,12,NeighborhoodConnectivity,true
STG, Model 1 default  node,13,Outdegree,true
STG, Model 1 default  node,14,PartnerOfMultiEdgedNodePairs,true
STG, Model 1 default  node,15,SelfLoops,true
STG, Model 1 default  node,16,Stress,true
STG, Model 1 default  node,17,Glucose,true
STG, Model 1 default  node,18,Pyruvate,true
STG, Model 1 default  node,19,PDK,true
STG, Model 1 default  node,20,PDC,true
STG, Model 1 default  node,21,AcetylCoA,true
STG, Model 1 default  node,22,Citrate,true
STG, Model 1 default  node,23,MalonylCoA,true
STG, Model 1 default  node,24,FattyAcids,true
STG, Model 1 default  node,25,AMPK,true
STG, Model 1 default  node,26,CircFA,true
