# Supplementary material
Source: publisher figshare collection journal article supplement (https://springernature.figshare.com/ndownloader/files/17562821)
Supplement: Supplementary file 1 [file 17562821 › CytoscapeSession-2018_09_25-21_15/apps/org.cytoscape.filter/filters.json]

[ {
  "name" : "Default filter",
  "transformers" : [ {
    "id" : "org.cytoscape.CompositeFilter",
    "parameters" : {
      "type" : "ALL"
    },
    "transformers" : [ {
      "id" : "org.cytoscape.ColumnFilter",
      "parameters" : {
        "predicate" : "BETWEEN",
        "criterion" : [ 0, 0 ],
        "caseSensitive" : false,
        "type" : "nodes",
        "anyMatch" : true,
        "columnName" : "PDK"
      }
    } ]
  } ]
} ]
