# Supplementary material
Source: publisher figshare collection journal article supplement (https://springernature.figshare.com/ndownloader/files/17562821)
Supplement: Supplementary file 1 [file 17562821 › CytoscapeSession-2018_09_25-21_15/apps/org.cytoscape.swing-application/network_list.xml]

<?xml version="1.0" encoding="UTF-8" standalone="yes"?>
<networkList>
    <network order="1" id="21522"/>
    <network order="2" id="37972"/>
    <network order="3" id="14328"/>
    <network order="0" id="26668"/>
    <network order="4" id="9182"/>
</networkList>
