# Supplementary material
Source: publisher figshare collection journal article supplement (https://springernature.figshare.com/ndownloader/files/17562821)
Supplement: Supplementary file 1 [file 17562821 › CytoscapeSession-2018_09_25-21_15/networks/9166-STG%2C+Model+4.xgmml]

<?xml version="1.0" encoding="UTF-8" standalone="yes"?>
<graph id="9166" label="STG, Model 4" cy:view="0" cy:registered="0" cy:documentVersion="3.0" xmlns:dc="http://purl.org/dc/elements/1.1/" xmlns:xlink="http://www.w3.org/1999/xlink" xmlns:rdf="http://www.w3.org/1999/02/22-rdf-syntax-ns#" xmlns:cy="http://www.cytoscape.org" xmlns="http://www.cs.rpi.edu/XGMML">
  <att>
    <graph id="9182" label="STG, Model 4" cy:registered="1">
      <node id="10215" label="0000000000"/>
      <node id="10214" label="0000000010"/>
      <node id="10213" label="0001000000"/>
      <node id="10212" label="1000000000"/>
      <node id="10211" label="1000000010"/>
      <node id="10210" label="1001000000"/>
      <node id="10209" label="1100000000"/>
      <node id="10208" label="1100000010"/>
      <node id="10207" label="1101000000"/>
      <node id="10206" label="0100000000"/>
      <node id="10205" label="0100000010"/>
      <node id="10204" label="0101000000"/>
      <node id="10203" label="1010000000"/>
      <node id="10202" label="1010000010"/>
      <node id="10201" label="1110000000"/>
      <node id="10200" label="0010000000"/>
      <node id="10199" label="0010000010"/>
      <node id="10198" label="1110000010"/>
      <node id="10197" label="0110000000"/>
      <node id="10196" label="0110000010"/>
      <node id="10195" label="0001000010"/>
      <node id="10194" label="1001000010"/>
      <node id="10193" label="1101000010"/>
      <node id="10192" label="1101100000"/>
      <node id="10191" label="0101000010"/>
      <node id="10190" label="0101100000"/>
      <node id="10189" label="1011000000"/>
      <node id="10188" label="1011000010"/>
      <node id="10187" label="1111000000"/>
      <node id="10186" label="0011000000"/>
      <node id="10185" label="0011000010"/>
      <node id="10184" label="1111000010"/>
      <node id="10183" label="1111100000"/>
      <node id="10182" label="0111000000"/>
      <node id="10181" label="0111000010"/>
      <node id="10180" label="0111100000"/>
      <node id="10179" label="1000100000"/>
      <node id="10178" label="1000110000"/>
      <node id="10177" label="1001100000"/>
      <node id="10176" label="1010100000"/>
      <node id="10175" label="1100100000"/>
      <node id="10174" label="0000100000"/>
      <node id="10173" label="0000110000"/>
      <node id="10172" label="0001100000"/>
      <node id="10171" label="0010100000"/>
      <node id="10170" label="1100110000"/>
      <node id="10169" label="0100100000"/>
      <node id="10168" label="0100110000"/>
      <node id="10167" label="1010110000"/>
      <node id="10166" label="1110100000"/>
      <node id="10165" label="0010110000"/>
      <node id="10164" label="1110110000"/>
      <node id="10163" label="0110100000"/>
      <node id="10162" label="0110110000"/>
      <node id="10161" label="1001110000"/>
      <node id="10160" label="1011100000"/>
      <node id="10159" label="1000010000"/>
      <node id="10158" label="1000010010"/>
      <node id="10157" label="1000011000"/>
      <node id="10156" label="1001010000"/>
      <node id="10155" label="0001110000"/>
      <node id="10154" label="0011100000"/>
      <node id="10153" label="0000010000"/>
      <node id="10152" label="0000010010"/>
      <node id="10151" label="0000011000"/>
      <node id="10150" label="0001010000"/>
      <node id="10149" label="1101110000"/>
      <node id="10148" label="1100010000"/>
      <node id="10147" label="1100010010"/>
      <node id="10146" label="1100011000"/>
      <node id="10145" label="1101010000"/>
      <node id="10144" label="0101110000"/>
      <node id="10143" label="0100010000"/>
      <node id="10142" label="0100010010"/>
      <node id="10141" label="0100011000"/>
      <node id="10140" label="0101010000"/>
      <node id="10139" label="1011110000"/>
      <node id="10138" label="1010010000"/>
      <node id="10137" label="1010010010"/>
      <node id="10136" label="1010011000"/>
      <node id="10135" label="0011110000"/>
      <node id="10134" label="0010010000"/>
      <node id="10133" label="0010010010"/>
      <node id="10132" label="0010011000"/>
      <node id="10131" label="1111110000"/>
      <node id="10130" label="1110010000"/>
      <node id="10129" label="1110010010"/>
      <node id="10128" label="1110011000"/>
      <node id="10127" label="0111110000"/>
      <node id="10126" label="0110010000"/>
      <node id="10125" label="0110010010"/>
      <node id="10124" label="0110011000"/>
      <node id="10123" label="1001010010"/>
      <node id="10122" label="1001011000"/>
      <node id="10121" label="0001010010"/>
      <node id="10120" label="0001011000"/>
      <node id="10119" label="1101010010"/>
      <node id="10118" label="1101011000"/>
      <node id="10117" label="0101010010"/>
      <node id="10116" label="0101011000"/>
      <node id="10115" label="1000001000"/>
      <node id="10114" label="1000001010"/>
      <node id="10113" label="1001001000"/>
      <node id="10112" label="1100001000"/>
      <node id="10111" label="0000001000"/>
      <node id="10110" label="0000001010"/>
      <node id="10109" label="0001001000"/>
      <node id="10108" label="1100001010"/>
      <node id="10107" label="1101001000"/>
      <node id="10106" label="0100001000"/>
      <node id="10105" label="0100001010"/>
      <node id="10104" label="0101001000"/>
      <node id="10103" label="1011010000"/>
      <node id="10102" label="1011010010"/>
      <node id="10101" label="1011011000"/>
      <node id="10100" label="0011010000"/>
      <node id="10099" label="0011010010"/>
      <node id="10098" label="0011011000"/>
      <node id="10097" label="0111010000"/>
      <node id="10096" label="0111010010"/>
      <node id="10095" label="0111011000"/>
      <node id="10094" label="1111010000"/>
      <node id="10093" label="1111010010"/>
      <node id="10092" label="1111011000"/>
      <node id="10091" label="1010001000"/>
      <node id="10090" label="1010001010"/>
      <node id="10089" label="1110001000"/>
      <node id="10088" label="0010001000"/>
      <node id="10087" label="0010001010"/>
      <node id="10086" label="1000111000"/>
      <node id="10085" label="1110001010"/>
      <node id="10084" label="0000111000"/>
      <node id="10083" label="0110001000"/>
      <node id="10082" label="0110001010"/>
      <node id="10081" label="1100111000"/>
      <node id="10080" label="0100111000"/>
      <node id="10079" label="1010111000"/>
      <node id="10078" label="1001001010"/>
      <node id="10077" label="0010111000"/>
      <node id="10076" label="0001001010"/>
      <node id="10075" label="1110111000"/>
      <node id="10074" label="1101001010"/>
      <node id="10073" label="1101101000"/>
      <node id="10072" label="0110111000"/>
      <node id="10071" label="0101001010"/>
      <node id="10070" label="0101101000"/>
      <node id="10069" label="1000000100"/>
      <node id="10068" label="1000000110"/>
      <node id="10067" label="1000100100"/>
      <node id="10066" label="1001000100"/>
      <node id="10065" label="1010000100"/>
      <node id="10064" label="1100000100"/>
      <node id="10063" label="1011001000"/>
      <node id="10062" label="1011001010"/>
      <node id="10061" label="1111001000"/>
      <node id="10060" label="0000000100"/>
      <node id="10059" label="0000000110"/>
      <node id="10058" label="0000100100"/>
      <node id="10057" label="0001000100"/>
      <node id="10056" label="0010000100"/>
      <node id="10055" label="0011001000"/>
      <node id="10054" label="0011001010"/>
      <node id="10053" label="1001111000"/>
      <node id="10052" label="1100000110"/>
      <node id="10051" label="1100100100"/>
      <node id="10050" label="1101000100"/>
      <node id="10049" label="1110000100"/>
      <node id="10048" label="1111001010"/>
      <node id="10047" label="1111101000"/>
      <node id="10046" label="0001111000"/>
      <node id="10045" label="0100000100"/>
      <node id="10044" label="0100000110"/>
      <node id="10043" label="0100100100"/>
      <node id="10042" label="0101000100"/>
      <node id="10041" label="0110000100"/>
      <node id="10040" label="0111001000"/>
      <node id="10039" label="0111001010"/>
      <node id="10038" label="0111101000"/>
      <node id="10037" label="1101111000"/>
      <node id="10036" label="0101111000"/>
      <node id="10035" label="0000101000"/>
      <node id="10034" label="0001101000"/>
      <node id="10033" label="0010101000"/>
      <node id="10032" label="1000101000"/>
      <node id="10031" label="1001101000"/>
      <node id="10030" label="1010101000"/>
      <node id="10029" label="1100101000"/>
      <node id="10028" label="1010000110"/>
      <node id="10027" label="1010100100"/>
      <node id="10026" label="0010000110"/>
      <node id="10025" label="0010100100"/>
      <node id="10024" label="0100101000"/>
      <node id="10023" label="1011111000"/>
      <node id="10022" label="1110000110"/>
      <node id="10021" label="1110100100"/>
      <node id="10020" label="0011111000"/>
      <node id="10019" label="0110000110"/>
      <node id="10018" label="0110100100"/>
      <node id="10017" label="1111111000"/>
      <node id="10016" label="0111111000"/>
      <node id="10015" label="1110101000"/>
      <node id="10014" label="0110101000"/>
      <node id="10013" label="1001000110"/>
      <node id="10012" label="1001100100"/>
      <node id="10011" label="1011000100"/>
      <node id="10010" label="0001000110"/>
      <node id="10009" label="0001100100"/>
      <node id="10008" label="0011000100"/>
      <node id="10007" label="1101000110"/>
      <node id="10006" label="1101100100"/>
      <node id="10005" label="1111000100"/>
      <node id="10004" label="0101000110"/>
      <node id="10003" label="0101100100"/>
      <node id="10002" label="0111000100"/>
      <node id="10001" label="1000011010"/>
      <node id="10000" label="1000011100"/>
      <node id="9999" label="0000011010"/>
      <node id="9998" label="0000011100"/>
      <node id="9997" label="0011101000"/>
      <node id="9996" label="1011101000"/>
      <node id="9995" label="1100011010"/>
      <node id="9994" label="1100011100"/>
      <node id="9993" label="1011000110"/>
      <node id="9992" label="1011100100"/>
      <node id="9991" label="0011000110"/>
      <node id="9990" label="0011100100"/>
      <node id="9989" label="0100011010"/>
      <node id="9988" label="0100011100"/>
      <node id="9987" label="1111000110"/>
      <node id="9986" label="1111100100"/>
      <node id="9985" label="0111000110"/>
      <node id="9984" label="0111100100"/>
      <node id="9983" label="1000110100"/>
      <node id="9982" label="1010011010"/>
      <node id="9981" label="1010011100"/>
      <node id="9980" label="0010011010"/>
      <node id="9979" label="0010011100"/>
      <node id="9978" label="0000110100"/>
      <node id="9977" label="1110011010"/>
      <node id="9976" label="1110011100"/>
      <node id="9975" label="1100110100"/>
      <node id="9974" label="0110011010"/>
      <node id="9973" label="0110011100"/>
      <node id="9972" label="0100110100"/>
      <node id="9971" label="1010110100"/>
      <node id="9970" label="0010110100"/>
      <node id="9969" label="1110110100"/>
      <node id="9968" label="1001011010"/>
      <node id="9967" label="1001011100"/>
      <node id="9966" label="0001011010"/>
      <node id="9965" label="0001011100"/>
      <node id="9964" label="0110110100"/>
      <node id="9963" label="1101011010"/>
      <node id="9962" label="1101011100"/>
      <node id="9961" label="0101011010"/>
      <node id="9960" label="0101011100"/>
      <node id="9959" label="1101100010"/>
      <node id="9958" label="1001110100"/>
      <node id="9957" label="1011011010"/>
      <node id="9956" label="1011011100"/>
      <node id="9955" label="0101100010"/>
      <node id="9954" label="0001110100"/>
      <node id="9953" label="0011011010"/>
      <node id="9952" label="0011011100"/>
      <node id="9951" label="0000010100"/>
      <node id="9950" label="0000010110"/>
      <node id="9949" label="0001010100"/>
      <node id="9948" label="0010010100"/>
      <node id="9947" label="1000010100"/>
      <node id="9946" label="1000010110"/>
      <node id="9945" label="1001010100"/>
      <node id="9944" label="1010010100"/>
      <node id="9943" label="1101110100"/>
      <node id="9942" label="0101110100"/>
      <node id="9941" label="0111011010"/>
      <node id="9940" label="0111011100"/>
      <node id="9939" label="1111011010"/>
      <node id="9938" label="1111011100"/>
      <node id="9937" label="0100010100"/>
      <node id="9936" label="0100010110"/>
      <node id="9935" label="0101010100"/>
      <node id="9934" label="0110010100"/>
      <node id="9933" label="1100010100"/>
      <node id="9932" label="1100010110"/>
      <node id="9931" label="1101010100"/>
      <node id="9930" label="1110010100"/>
      <node id="9929" label="1000111100"/>
      <node id="9928" label="0000111100"/>
      <node id="9927" label="1111100010"/>
      <node id="9926" label="1100111100"/>
      <node id="9925" label="1011110100"/>
      <node id="9924" label="0011110100"/>
      <node id="9923" label="0100111100"/>
      <node id="9922" label="0111100010"/>
      <node id="9921" label="0010010110"/>
      <node id="9920" label="1010010110"/>
      <node id="9919" label="1111110100"/>
      <node id="9918" label="0111110100"/>
      <node id="9917" label="0110010110"/>
      <node id="9916" label="1110010110"/>
      <node id="9915" label="1000100010"/>
      <node id="9914" label="1000110010"/>
      <node id="9913" label="1001100010"/>
      <node id="9912" label="1010100010"/>
      <node id="9911" label="1100100010"/>
      <node id="9910" label="0000100010"/>
      <node id="9909" label="0000110010"/>
      <node id="9908" label="0001100010"/>
      <node id="9907" label="0010100010"/>
      <node id="9906" label="1010111100"/>
      <node id="9905" label="1100110010"/>
      <node id="9904" label="0010111100"/>
      <node id="9903" label="0100100010"/>
      <node id="9902" label="0100110010"/>
      <node id="9901" label="0000000001"/>
      <node id="9900" label="0000000011"/>
      <node id="9899" label="0000000101"/>
      <node id="9898" label="0001000001"/>
      <node id="9897" label="1000000001"/>
      <node id="9896" label="1000000011"/>
      <node id="9895" label="1000000101"/>
      <node id="9894" label="1001000001"/>
      <node id="9893" label="1100000001"/>
      <node id="9892" label="1110111100"/>
      <node id="9891" label="0110111100"/>
      <node id="9890" label="1100000011"/>
      <node id="9889" label="1100000101"/>
      <node id="9888" label="1101000001"/>
      <node id="9887" label="0100000001"/>
      <node id="9886" label="0100000011"/>
      <node id="9885" label="0100000101"/>
      <node id="9884" label="0101000001"/>
      <node id="9883" label="0001010110"/>
      <node id="9882" label="0011010100"/>
      <node id="9881" label="1001010110"/>
      <node id="9880" label="1011010100"/>
      <node id="9879" label="1010110010"/>
      <node id="9878" label="1110100010"/>
      <node id="9877" label="0010110010"/>
      <node id="9876" label="0101010110"/>
      <node id="9875" label="0111010100"/>
      <node id="9874" label="1101010110"/>
      <node id="9873" label="1111010100"/>
      <node id="9872" label="1110110010"/>
      <node id="9871" label="1000001100"/>
      <node id="9870" label="1000001110"/>
      <node id="9869" label="1001001100"/>
      <node id="9868" label="1010001100"/>
      <node id="9867" label="1100001100"/>
      <node id="9866" label="0000001100"/>
      <node id="9865" label="0000001110"/>
      <node id="9864" label="0001001100"/>
      <node id="9863" label="0010001100"/>
      <node id="9862" label="0110100010"/>
      <node id="9861" label="0110110010"/>
      <node id="9860" label="1010000001"/>
      <node id="9859" label="1010000011"/>
      <node id="9858" label="1010000101"/>
      <node id="9857" label="1110000001"/>
      <node id="9856" label="0010000001"/>
      <node id="9855" label="0010000011"/>
      <node id="9854" label="0010000101"/>
      <node id="9853" label="1001111100"/>
      <node id="9852" label="1100001110"/>
      <node id="9851" label="1101001100"/>
      <node id="9850" label="1110001100"/>
      <node id="9849" label="0001111100"/>
      <node id="9848" label="0100001100"/>
      <node id="9847" label="0100001110"/>
      <node id="9846" label="0101001100"/>
      <node id="9845" label="0110001100"/>
      <node id="9844" label="1110000011"/>
      <node id="9843" label="1110000101"/>
      <node id="9842" label="0110000001"/>
      <node id="9841" label="0110000011"/>
      <node id="9840" label="0110000101"/>
      <node id="9839" label="1101111100"/>
      <node id="9838" label="0101111100"/>
      <node id="9837" label="0011010110"/>
      <node id="9836" label="1011010110"/>
      <node id="9835" label="0111010110"/>
      <node id="9834" label="1111010110"/>
      <node id="9833" label="1010001110"/>
      <node id="9832" label="1001110010"/>
      <node id="9831" label="1011100010"/>
      <node id="9830" label="0010001110"/>
      <node id="9829" label="0001110010"/>
      <node id="9828" label="0011100010"/>
      <node id="9827" label="1101110010"/>
      <node id="9826" label="0110001110"/>
      <node id="9825" label="0001000011"/>
      <node id="9824" label="0001000101"/>
      <node id="9823" label="1011111100"/>
      <node id="9822" label="1110001110"/>
      <node id="9821" label="0011111100"/>
      <node id="9820" label="1001000011"/>
      <node id="9819" label="1001000101"/>
      <node id="9818" label="0101110010"/>
      <node id="9817" label="1111111100"/>
      <node id="9816" label="0111111100"/>
      <node id="9815" label="1101000011"/>
      <node id="9814" label="1101000101"/>
      <node id="9813" label="1101100001"/>
      <node id="9812" label="0101000011"/>
      <node id="9811" label="0101000101"/>
      <node id="9810" label="0101100001"/>
      <node id="9809" label="1011110010"/>
      <node id="9808" label="0011110010"/>
      <node id="9807" label="1111110010"/>
      <node id="9806" label="1001001110"/>
      <node id="9805" label="1011001100"/>
      <node id="9804" label="0011000001"/>
      <node id="9803" label="0011000011"/>
      <node id="9802" label="0011000101"/>
      <node id="9801" label="0001001110"/>
      <node id="9800" label="0011001100"/>
      <node id="9799" label="0111110010"/>
      <node id="9798" label="1011000001"/>
      <node id="9797" label="1011000011"/>
      <node id="9796" label="1011000101"/>
      <node id="9795" label="1111000001"/>
      <node id="9794" label="1101001110"/>
      <node id="9793" label="1101101100"/>
      <node id="9792" label="1111001100"/>
      <node id="9791" label="0101001110"/>
      <node id="9790" label="0101101100"/>
      <node id="9789" label="0111001100"/>
      <node id="9788" label="1111000011"/>
      <node id="9787" label="1111000101"/>
      <node id="9786" label="1111100001"/>
      <node id="9785" label="0111000001"/>
      <node id="9784" label="0111000011"/>
      <node id="9783" label="0111000101"/>
      <node id="9782" label="0111100001"/>
      <node id="9781" label="0000100001"/>
      <node id="9780" label="0000100101"/>
      <node id="9779" label="0000110001"/>
      <node id="9778" label="0001100001"/>
      <node id="9777" label="0010100001"/>
      <node id="9776" label="1000100001"/>
      <node id="9775" label="1000100101"/>
      <node id="9774" label="1000110001"/>
      <node id="9773" label="1001100001"/>
      <node id="9772" label="1010100001"/>
      <node id="9771" label="1100100001"/>
      <node id="9770" label="1011001110"/>
      <node id="9769" label="0011001110"/>
      <node id="9768" label="1100100101"/>
      <node id="9767" label="1100110001"/>
      <node id="9766" label="0100100001"/>
      <node id="9765" label="0100100101"/>
      <node id="9764" label="0100110001"/>
      <node id="9763" label="1111001110"/>
      <node id="9762" label="1111101100"/>
      <node id="9761" label="0111001110"/>
      <node id="9760" label="0111101100"/>
      <node id="9759" label="0000101100"/>
      <node id="9758" label="0001101100"/>
      <node id="9757" label="0010101100"/>
      <node id="9756" label="1000101100"/>
      <node id="9755" label="1001101100"/>
      <node id="9754" label="1010101100"/>
      <node id="9753" label="1100101100"/>
      <node id="9752" label="0010100101"/>
      <node id="9751" label="0010110001"/>
      <node id="9750" label="1010100101"/>
      <node id="9749" label="1010110001"/>
      <node id="9748" label="1110100001"/>
      <node id="9747" label="1110101100"/>
      <node id="9746" label="0100101100"/>
      <node id="9745" label="0110101100"/>
      <node id="9744" label="1110100101"/>
      <node id="9743" label="1110110001"/>
      <node id="9742" label="0110100001"/>
      <node id="9741" label="0110100101"/>
      <node id="9740" label="0110110001"/>
      <node id="9739" label="1000010001"/>
      <node id="9738" label="1000010011"/>
      <node id="9737" label="1000010101"/>
      <node id="9736" label="1000011001"/>
      <node id="9735" label="1001010001"/>
      <node id="9734" label="0000010001"/>
      <node id="9733" label="0000010011"/>
      <node id="9732" label="0000010101"/>
      <node id="9731" label="0000011001"/>
      <node id="9730" label="0001010001"/>
      <node id="9729" label="0001100101"/>
      <node id="9728" label="0001110001"/>
      <node id="9727" label="0011100001"/>
      <node id="9726" label="1001100101"/>
      <node id="9725" label="1001110001"/>
      <node id="9724" label="1011100001"/>
      <node id="9723" label="1101100101"/>
      <node id="9722" label="1101110001"/>
      <node id="9721" label="1100010001"/>
      <node id="9720" label="1100010011"/>
      <node id="9719" label="1100010101"/>
      <node id="9718" label="1100011001"/>
      <node id="9717" label="1101010001"/>
      <node id="9716" label="0101100101"/>
      <node id="9715" label="0101110001"/>
      <node id="9714" label="0100010001"/>
      <node id="9713" label="0100010011"/>
      <node id="9712" label="0100010101"/>
      <node id="9711" label="0100011001"/>
      <node id="9710" label="0101010001"/>
      <node id="9709" label="0000011110"/>
      <node id="9708" label="1101101010"/>
      <node id="9707" label="1000011110"/>
      <node id="9706" label="1011101100"/>
      <node id="9705" label="0011100101"/>
      <node id="9704" label="0011110001"/>
      <node id="9703" label="0101101010"/>
      <node id="9702" label="0010010001"/>
      <node id="9701" label="0010010011"/>
      <node id="9700" label="0010010101"/>
      <node id="9699" label="0010011001"/>
      <node id="9698" label="1011100101"/>
      <node id="9697" label="1011110001"/>
      <node id="9696" label="1010010001"/>
      <node id="9695" label="1010010011"/>
      <node id="9694" label="1010010101"/>
      <node id="9693" label="1010011001"/>
      <node id="9692" label="0011101100"/>
      <node id="9691" label="1100011110"/>
      <node id="9690" label="0100011110"/>
      <node id="9689" label="1111100101"/>
      <node id="9688" label="1111110001"/>
      <node id="9687" label="1110010001"/>
      <node id="9686" label="1110010011"/>
      <node id="9685" label="1110010101"/>
      <node id="9684" label="1110011001"/>
      <node id="9683" label="0111100101"/>
      <node id="9682" label="0111110001"/>
      <node id="9681" label="0110010001"/>
      <node id="9680" label="0110010011"/>
      <node id="9679" label="0110010101"/>
      <node id="9678" label="0110011001"/>
      <node id="9677" label="1000100110"/>
      <node id="9676" label="0000100110"/>
      <node id="9675" label="1010011110"/>
      <node id="9674" label="1100100110"/>
      <node id="9673" label="1111101010"/>
      <node id="9672" label="0010011110"/>
      <node id="9671" label="0111101010"/>
      <node id="9670" label="0100100110"/>
      <node id="9669" label="1110011110"/>
      <node id="9668" label="0110011110"/>
      <node id="9667" label="1001010011"/>
      <node id="9666" label="1001010101"/>
      <node id="9665" label="1001011001"/>
      <node id="9664" label="0001010011"/>
      <node id="9663" label="0001010101"/>
      <node id="9662" label="0001011001"/>
      <node id="9661" label="0000101010"/>
      <node id="9660" label="0000111010"/>
      <node id="9659" label="0001101010"/>
      <node id="9658" label="0010101010"/>
      <node id="9657" label="1000101010"/>
      <node id="9656" label="1000111010"/>
      <node id="9655" label="1001101010"/>
      <node id="9654" label="1010101010"/>
      <node id="9653" label="1100101010"/>
      <node id="9652" label="1101010011"/>
      <node id="9651" label="1101010101"/>
      <node id="9650" label="1101011001"/>
      <node id="9649" label="0101010011"/>
      <node id="9648" label="0101010101"/>
      <node id="9647" label="0101011001"/>
      <node id="9646" label="1010100110"/>
      <node id="9645" label="1100111010"/>
      <node id="9644" label="0010100110"/>
      <node id="9643" label="0100101010"/>
      <node id="9642" label="0100111010"/>
      <node id="9641" label="1000001001"/>
      <node id="9640" label="1000001011"/>
      <node id="9639" label="1000001101"/>
      <node id="9638" label="1001001001"/>
      <node id="9637" label="1100001001"/>
      <node id="9636" label="0000001001"/>
      <node id="9635" label="0000001011"/>
      <node id="9634" label="0000001101"/>
      <node id="9633" label="0001001001"/>
      <node id="9632" label="1110100110"/>
      <node id="9631" label="0110100110"/>
      <node id="9630" label="1100001011"/>
      <node id="9629" label="1100001101"/>
      <node id="9628" label="1101001001"/>
      <node id="9627" label="0100001001"/>
      <node id="9626" label="0100001011"/>
      <node id="9625" label="0100001101"/>
      <node id="9624" label="0101001001"/>
      <node id="9623" label="1001011110"/>
      <node id="9622" label="0001011110"/>
      <node id="9621" label="1011010001"/>
      <node id="9620" label="1011010011"/>
      <node id="9619" label="1011010101"/>
      <node id="9618" label="1011011001"/>
      <node id="9617" label="0011010001"/>
      <node id="9616" label="0011010011"/>
      <node id="9615" label="0011010101"/>
      <node id="9614" label="0011011001"/>
      <node id="9613" label="1101011110"/>
      <node id="9612" label="0010111010"/>
      <node id="9611" label="0101011110"/>
      <node id="9610" label="1010111010"/>
      <node id="9609" label="1110101010"/>
      <node id="9608" label="0111010001"/>
      <node id="9607" label="0111010011"/>
      <node id="9606" label="0111010101"/>
      <node id="9605" label="0111011001"/>
      <node id="9604" label="1111010001"/>
      <node id="9603" label="1111010011"/>
      <node id="9602" label="1111010101"/>
      <node id="9601" label="1111011001"/>
      <node id="9600" label="1110111010"/>
      <node id="9599" label="0110101010"/>
      <node id="9598" label="0110111010"/>
      <node id="9597" label="1010001001"/>
      <node id="9596" label="1010001011"/>
      <node id="9595" label="1010001101"/>
      <node id="9594" label="1110001001"/>
      <node id="9593" label="0010001001"/>
      <node id="9592" label="0010001011"/>
      <node id="9591" label="0010001101"/>
      <node id="9590" label="1001100110"/>
      <node id="9589" label="0001100110"/>
      <node id="9588" label="1110001011"/>
      <node id="9587" label="1110001101"/>
      <node id="9586" label="1000110101"/>
      <node id="9585" label="1000111001"/>
      <node id="9584" label="0110001001"/>
      <node id="9583" label="0110001011"/>
      <node id="9582" label="0110001101"/>
      <node id="9581" label="0000110101"/>
      <node id="9580" label="0000111001"/>
      <node id="9579" label="1011011110"/>
      <node id="9578" label="1101100110"/>
      <node id="9577" label="0011011110"/>
      <node id="9576" label="0101100110"/>
      <node id="9575" label="1100110101"/>
      <node id="9574" label="1100111001"/>
      <node id="9573" label="0100110101"/>
      <node id="9572" label="0100111001"/>
      <node id="9571" label="1111011110"/>
      <node id="9570" label="0111011110"/>
      <node id="9569" label="0001111010"/>
      <node id="9568" label="0011101010"/>
      <node id="9567" label="1001111010"/>
      <node id="9566" label="1011101010"/>
      <node id="9565" label="1101111010"/>
      <node id="9564" label="0010110101"/>
      <node id="9563" label="0010111001"/>
      <node id="9562" label="1001001011"/>
      <node id="9561" label="1001001101"/>
      <node id="9560" label="1011100110"/>
      <node id="9559" label="0001001011"/>
      <node id="9558" label="0001001101"/>
      <node id="9557" label="1010110101"/>
      <node id="9556" label="1010111001"/>
      <node id="9555" label="0011100110"/>
      <node id="9554" label="0101111010"/>
      <node id="9553" label="1111100110"/>
      <node id="9552" label="0111100110"/>
      <node id="9551" label="1101001011"/>
      <node id="9550" label="1101001101"/>
      <node id="9549" label="1101101001"/>
      <node id="9548" label="1110110101"/>
      <node id="9547" label="1110111001"/>
      <node id="9546" label="0101001011"/>
      <node id="9545" label="0101001101"/>
      <node id="9544" label="0101101001"/>
      <node id="9543" label="0110110101"/>
      <node id="9542" label="0110111001"/>
      <node id="9541" label="1000110110"/>
      <node id="9540" label="0000110110"/>
      <node id="9539" label="0011111010"/>
      <node id="9538" label="1011111010"/>
      <node id="9537" label="1100110110"/>
      <node id="9536" label="1111111010"/>
      <node id="9535" label="1000000111"/>
      <node id="9534" label="0011001001"/>
      <node id="9533" label="0011001011"/>
      <node id="9532" label="0011001101"/>
      <node id="9531" label="0100110110"/>
      <node id="9530" label="0000000111"/>
      <node id="9529" label="1011001001"/>
      <node id="9528" label="1011001011"/>
      <node id="9527" label="1011001101"/>
      <node id="9526" label="1111001001"/>
      <node id="9525" label="0111111010"/>
      <node id="9524" label="1100000111"/>
      <node id="9523" label="1001110101"/>
      <node id="9522" label="1001111001"/>
      <node id="9521" label="1111001011"/>
      <node id="9520" label="1111001101"/>
      <node id="9519" label="1111101001"/>
      <node id="9518" label="0100000111"/>
      <node id="9517" label="0001110101"/>
      <node id="9516" label="0001111001"/>
      <node id="9515" label="0111001001"/>
      <node id="9514" label="0111001011"/>
      <node id="9513" label="0111001101"/>
      <node id="9512" label="0111101001"/>
      <node id="9511" label="1101110101"/>
      <node id="9510" label="1101111001"/>
      <node id="9509" label="0101110101"/>
      <node id="9508" label="0101111001"/>
      <node id="9507" label="1010110110"/>
      <node id="9506" label="0010110110"/>
      <node id="9505" label="0000101001"/>
      <node id="9504" label="0000101101"/>
      <node id="9503" label="0001101001"/>
      <node id="9502" label="0010101001"/>
      <node id="9501" label="1000101001"/>
      <node id="9500" label="1000101101"/>
      <node id="9499" label="1001101001"/>
      <node id="9498" label="1010101001"/>
      <node id="9497" label="1100101001"/>
      <node id="9496" label="1110110110"/>
      <node id="9495" label="0110110110"/>
      <node id="9494" label="0010000111"/>
      <node id="9493" label="1010000111"/>
      <node id="9492" label="1100101101"/>
      <node id="9491" label="0100101001"/>
      <node id="9490" label="0100101101"/>
      <node id="9489" label="1110000111"/>
      <node id="9488" label="1011110101"/>
      <node id="9487" label="1011111001"/>
      <node id="9486" label="0110000111"/>
      <node id="9485" label="0011110101"/>
      <node id="9484" label="0011111001"/>
      <node id="9483" label="1111110101"/>
      <node id="9482" label="1111111001"/>
      <node id="9481" label="0111110101"/>
      <node id="9480" label="0111111001"/>
      <node id="9479" label="0010101101"/>
      <node id="9478" label="1010101101"/>
      <node id="9477" label="1110101001"/>
      <node id="9476" label="1001110110"/>
      <node id="9475" label="0001110110"/>
      <node id="9474" label="1110101101"/>
      <node id="9473" label="0110101001"/>
      <node id="9472" label="0110101101"/>
      <node id="9471" label="1101110110"/>
      <node id="9470" label="0101110110"/>
      <node id="9469" label="1001000111"/>
      <node id="9468" label="0001000111"/>
      <node id="9467" label="1101000111"/>
      <node id="9466" label="0101000111"/>
      <node id="9465" label="1000111110"/>
      <node id="9464" label="0000111110"/>
      <node id="9463" label="1011110110"/>
      <node id="9462" label="1100111110"/>
      <node id="9461" label="0011110110"/>
      <node id="9460" label="0100111110"/>
      <node id="9459" label="1000011011"/>
      <node id="9458" label="1000011101"/>
      <node id="9457" label="0000011011"/>
      <node id="9456" label="0000011101"/>
      <node id="9455" label="0001101101"/>
      <node id="9454" label="0011101001"/>
      <node id="9453" label="1001101101"/>
      <node id="9452" label="1011101001"/>
      <node id="9451" label="1111110110"/>
      <node id="9450" label="0111110110"/>
      <node id="9449" label="0100011011"/>
      <node id="9448" label="0100011101"/>
      <node id="9447" label="0011000111"/>
      <node id="9446" label="1011000111"/>
      <node id="9445" label="1101101101"/>
      <node id="9444" label="1100011011"/>
      <node id="9443" label="1100011101"/>
      <node id="9442" label="0101101101"/>
      <node id="9441" label="1111000111"/>
      <node id="9440" label="0111000111"/>
      <node id="9439" label="1010111110"/>
      <node id="9438" label="0010111110"/>
      <node id="9437" label="1110111110"/>
      <node id="9436" label="0110111110"/>
      <node id="9435" label="1010011011"/>
      <node id="9434" label="1010011101"/>
      <node id="9433" label="1011101101"/>
      <node id="9432" label="0011101101"/>
      <node id="9431" label="0010011011"/>
      <node id="9430" label="0010011101"/>
      <node id="9429" label="1110011011"/>
      <node id="9428" label="1110011101"/>
      <node id="9427" label="1111101101"/>
      <node id="9426" label="0110011011"/>
      <node id="9425" label="0110011101"/>
      <node id="9424" label="0111101101"/>
      <node id="9423" label="1001111110"/>
      <node id="9422" label="0001111110"/>
      <node id="9421" label="1101111110"/>
      <node id="9420" label="0101111110"/>
      <node id="9419" label="1001011011"/>
      <node id="9418" label="1001011101"/>
      <node id="9417" label="0001011011"/>
      <node id="9416" label="0001011101"/>
      <node id="9415" label="1101011011"/>
      <node id="9414" label="1101011101"/>
      <node id="9413" label="0101011011"/>
      <node id="9412" label="0101011101"/>
      <node id="9411" label="1011111110"/>
      <node id="9410" label="0011111110"/>
      <node id="9409" label="1011011011"/>
      <node id="9408" label="1011011101"/>
      <node id="9407" label="1111111110"/>
      <node id="9406" label="1000010111"/>
      <node id="9405" label="0011011011"/>
      <node id="9404" label="0011011101"/>
      <node id="9403" label="0111111110"/>
      <node id="9402" label="1101100011"/>
      <node id="9401" label="0000010111"/>
      <node id="9400" label="0101100011"/>
      <node id="9399" label="1100010111"/>
      <node id="9398" label="0100010111"/>
      <node id="9397" label="0111011011"/>
      <node id="9396" label="0111011101"/>
      <node id="9395" label="1111011011"/>
      <node id="9394" label="1111011101"/>
      <node id="9393" label="1000111101"/>
      <node id="9392" label="0000111101"/>
      <node id="9391" label="0010010111"/>
      <node id="9390" label="1101101110"/>
      <node id="9389" label="1100111101"/>
      <node id="9388" label="0111100011"/>
      <node id="9387" label="0101101110"/>
      <node id="9386" label="1111100011"/>
      <node id="9385" label="1010010111"/>
      <node id="9384" label="0100111101"/>
      <node id="9383" label="1110010111"/>
      <node id="9382" label="0110010111"/>
      <node id="9381" label="0000100011"/>
      <node id="9380" label="0000100111"/>
      <node id="9379" label="0000110011"/>
      <node id="9378" label="0001100011"/>
      <node id="9377" label="0010100011"/>
      <node id="9376" label="1000100011"/>
      <node id="9375" label="1000100111"/>
      <node id="9374" label="1000110011"/>
      <node id="9373" label="1001100011"/>
      <node id="9372" label="1010100011"/>
      <node id="9371" label="1100100011"/>
      <node id="9370" label="1010111101"/>
      <node id="9369" label="1100100111"/>
      <node id="9368" label="1100110011"/>
      <node id="9367" label="0010111101"/>
      <node id="9366" label="0100100011"/>
      <node id="9365" label="0100100111"/>
      <node id="9364" label="0100110011"/>
      <node id="9363" label="1111101110"/>
      <node id="9362" label="0111101110"/>
      <node id="9361" label="1110111101"/>
      <node id="9360" label="0110111101"/>
      <node id="9359" label="1001010111"/>
      <node id="9358" label="0001010111"/>
      <node id="9357" label="0000101110"/>
      <node id="9356" label="0001101110"/>
      <node id="9355" label="0010101110"/>
      <node id="9354" label="1000101110"/>
      <node id="9353" label="1001101110"/>
      <node id="9352" label="1010101110"/>
      <node id="9351" label="1100101110"/>
      <node id="9350" label="1101010111"/>
      <node id="9349" label="0010100111"/>
      <node id="9348" label="0010110011"/>
      <node id="9347" label="0101010111"/>
      <node id="9346" label="1010100111"/>
      <node id="9345" label="1010110011"/>
      <node id="9344" label="1110100011"/>
      <node id="9343" label="1110101110"/>
      <node id="9342" label="0100101110"/>
      <node id="9341" label="0110101110"/>
      <node id="9340" label="0000001111"/>
      <node id="9339" label="1000001111"/>
      <node id="9338" label="1110100111"/>
      <node id="9337" label="1110110011"/>
      <node id="9336" label="0110100011"/>
      <node id="9335" label="0110100111"/>
      <node id="9334" label="0110110011"/>
      <node id="9333" label="1100001111"/>
      <node id="9332" label="1001111101"/>
      <node id="9331" label="0100001111"/>
      <node id="9330" label="0001111101"/>
      <node id="9329" label="1101111101"/>
      <node id="9328" label="1011010111"/>
      <node id="9327" label="0101111101"/>
      <node id="9326" label="0011010111"/>
      <node id="9325" label="1111010111"/>
      <node id="9324" label="0111010111"/>
      <node id="9323" label="0010001111"/>
      <node id="9322" label="1010001111"/>
      <node id="9321" label="0001100111"/>
      <node id="9320" label="0001110011"/>
      <node id="9319" label="0011100011"/>
      <node id="9318" label="1001100111"/>
      <node id="9317" label="1001110011"/>
      <node id="9316" label="1011100011"/>
      <node id="9315" label="1101100111"/>
      <node id="9314" label="1101110011"/>
      <node id="9313" label="1110001111"/>
      <node id="9312" label="0011111101"/>
      <node id="9311" label="1011111101"/>
      <node id="9310" label="0110001111"/>
      <node id="9309" label="0101100111"/>
      <node id="9308" label="0101110011"/>
      <node id="9307" label="1111111101"/>
      <node id="9306" label="0111111101"/>
      <node id="9305" label="0011101110"/>
      <node id="9304" label="1011101110"/>
      <node id="9303" label="0011100111"/>
      <node id="9302" label="0011110011"/>
      <node id="9301" label="1011100111"/>
      <node id="9300" label="1011110011"/>
      <node id="9299" label="0111100111"/>
      <node id="9298" label="0111110011"/>
      <node id="9297" label="0001001111"/>
      <node id="9296" label="1001001111"/>
      <node id="9295" label="1111100111"/>
      <node id="9294" label="1111110011"/>
      <node id="9293" label="1101001111"/>
      <node id="9292" label="0101001111"/>
      <node id="9291" label="0011001111"/>
      <node id="9290" label="1011001111"/>
      <node id="9289" label="1111001111"/>
      <node id="9288" label="0111001111"/>
      <node id="9287" label="1000110111"/>
      <node id="9286" label="0000110111"/>
      <node id="9285" label="1100110111"/>
      <node id="9284" label="0100110111"/>
      <node id="9283" label="1010110111"/>
      <node id="9282" label="0010110111"/>
      <node id="9281" label="0000011111"/>
      <node id="9280" label="1000011111"/>
      <node id="9279" label="1101101011"/>
      <node id="9278" label="0110110111"/>
      <node id="9277" label="1110110111"/>
      <node id="9276" label="0101101011"/>
      <node id="9275" label="1100011111"/>
      <node id="9274" label="0100011111"/>
      <node id="9273" label="0010011111"/>
      <node id="9272" label="0111101011"/>
      <node id="9271" label="1010011111"/>
      <node id="9270" label="1001110111"/>
      <node id="9269" label="1111101011"/>
      <node id="9268" label="0001110111"/>
      <node id="9267" label="1110011111"/>
      <node id="9266" label="1101110111"/>
      <node id="9265" label="0110011111"/>
      <node id="9264" label="0101110111"/>
      <node id="9263" label="0000101011"/>
      <node id="9262" label="0000101111"/>
      <node id="9261" label="0000111011"/>
      <node id="9260" label="0001101011"/>
      <node id="9259" label="0010101011"/>
      <node id="9258" label="1000101011"/>
      <node id="9257" label="1000101111"/>
      <node id="9256" label="1000111011"/>
      <node id="9255" label="1001101011"/>
      <node id="9254" label="1010101011"/>
      <node id="9253" label="1100101011"/>
      <node id="9252" label="1100101111"/>
      <node id="9251" label="1100111011"/>
      <node id="9250" label="0100101011"/>
      <node id="9249" label="0100101111"/>
      <node id="9248" label="0100111011"/>
      <node id="9247" label="1011110111"/>
      <node id="9246" label="0011110111"/>
      <node id="9245" label="0001011111"/>
      <node id="9244" label="1001011111"/>
      <node id="9243" label="1111110111"/>
      <node id="9242" label="0111110111"/>
      <node id="9241" label="1101011111"/>
      <node id="9240" label="0101011111"/>
      <node id="9239" label="0010101111"/>
      <node id="9238" label="0010111011"/>
      <node id="9237" label="1010101111"/>
      <node id="9236" label="1010111011"/>
      <node id="9235" label="1110101011"/>
      <node id="9234" label="1110101111"/>
      <node id="9233" label="1110111011"/>
      <node id="9232" label="0110101011"/>
      <node id="9231" label="0110101111"/>
      <node id="9230" label="0110111011"/>
      <node id="9229" label="0011011111"/>
      <node id="9228" label="1011011111"/>
      <node id="9227" label="1111011111"/>
      <node id="9226" label="0111011111"/>
      <node id="9225" label="0001101111"/>
      <node id="9224" label="0001111011"/>
      <node id="9223" label="0011101011"/>
      <node id="9222" label="1001101111"/>
      <node id="9221" label="1001111011"/>
      <node id="9220" label="1011101011"/>
      <node id="9219" label="1101101111"/>
      <node id="9218" label="1101111011"/>
      <node id="9217" label="0101101111"/>
      <node id="9216" label="0101111011"/>
      <node id="9215" label="0011101111"/>
      <node id="9214" label="0011111011"/>
      <node id="9213" label="1011101111"/>
      <node id="9212" label="1011111011"/>
      <node id="9211" label="1111101111"/>
      <node id="9210" label="1111111011"/>
      <node id="9209" label="0111101111"/>
      <node id="9208" label="0111111011"/>
      <node id="9207" label="1000111111"/>
      <node id="9206" label="0000111111"/>
      <node id="9205" label="1100111111"/>
      <node id="9204" label="0100111111"/>
      <node id="9203" label="1010111111"/>
      <node id="9202" label="0010111111"/>
      <node id="9201" label="1110111111"/>
      <node id="9200" label="0110111111"/>
      <node id="9199" label="1001111111"/>
      <node id="9198" label="0001111111"/>
      <node id="9197" label="1101111111"/>
      <node id="9196" label="0101111111"/>
      <node id="9195" label="1011111111"/>
      <node id="9194" label="0011111111"/>
      <node id="9193" label="1111111111"/>
      <node id="9192" label="0111111111"/>
      <edge id="14311" label="0000000000 (1) 0000000010" source="10215" target="10214" cy:directed="1"/>
      <edge id="14310" label="0000000000 (1) 0001000000" source="10215" target="10213" cy:directed="1"/>
      <edge id="14309" label="0000000010 (1) 0001000010" source="10214" target="10195" cy:directed="1"/>
      <edge id="14308" label="0001000000 (1) 0001000010" source="10213" target="10195" cy:directed="1"/>
      <edge id="14307" label="1000000000 (1) 1000000010" source="10212" target="10211" cy:directed="1"/>
      <edge id="14306" label="1000000000 (1) 1001000000" source="10212" target="10210" cy:directed="1"/>
      <edge id="14305" label="1000000000 (1) 1100000000" source="10212" target="10209" cy:directed="1"/>
      <edge id="14304" label="1000000010 (1) 1001000010" source="10211" target="10194" cy:directed="1"/>
      <edge id="14303" label="1000000010 (1) 1100000010" source="10211" target="10208" cy:directed="1"/>
      <edge id="14302" label="1001000000 (1) 1001000010" source="10210" target="10194" cy:directed="1"/>
      <edge id="14301" label="1001000000 (1) 1101000000" source="10210" target="10207" cy:directed="1"/>
      <edge id="14300" label="1100000000 (1) 1100000010" source="10209" target="10208" cy:directed="1"/>
      <edge id="14299" label="1100000000 (1) 1101000000" source="10209" target="10207" cy:directed="1"/>
      <edge id="14298" label="1100000010 (1) 1101000010" source="10208" target="10193" cy:directed="1"/>
      <edge id="14297" label="1101000000 (1) 1101000010" source="10207" target="10193" cy:directed="1"/>
      <edge id="14296" label="1101000000 (1) 1101100000" source="10207" target="10192" cy:directed="1"/>
      <edge id="14295" label="0100000000 (1) 0100000010" source="10206" target="10205" cy:directed="1"/>
      <edge id="14294" label="0100000000 (1) 0101000000" source="10206" target="10204" cy:directed="1"/>
      <edge id="14293" label="0100000000 (1) 0000000000" source="10206" target="10215" cy:directed="1"/>
      <edge id="14292" label="0100000010 (1) 0101000010" source="10205" target="10191" cy:directed="1"/>
      <edge id="14291" label="0100000010 (1) 0000000010" source="10205" target="10214" cy:directed="1"/>
      <edge id="14290" label="0101000000 (1) 0101000010" source="10204" target="10191" cy:directed="1"/>
      <edge id="14289" label="0101000000 (1) 0101100000" source="10204" target="10190" cy:directed="1"/>
      <edge id="14288" label="0101000000 (1) 0001000000" source="10204" target="10213" cy:directed="1"/>
      <edge id="14287" label="1010000000 (1) 1010000010" source="10203" target="10202" cy:directed="1"/>
      <edge id="14286" label="1010000000 (1) 1000000000" source="10203" target="10212" cy:directed="1"/>
      <edge id="14285" label="1010000000 (1) 1110000000" source="10203" target="10201" cy:directed="1"/>
      <edge id="14284" label="1010000010 (1) 1000000010" source="10202" target="10211" cy:directed="1"/>
      <edge id="14283" label="1010000010 (1) 1110000010" source="10202" target="10198" cy:directed="1"/>
      <edge id="14282" label="1110000000 (1) 1110000010" source="10201" target="10198" cy:directed="1"/>
      <edge id="14281" label="1110000000 (1) 1100000000" source="10201" target="10209" cy:directed="1"/>
      <edge id="14280" label="0010000000 (1) 0010000010" source="10200" target="10199" cy:directed="1"/>
      <edge id="14279" label="0010000000 (1) 0000000000" source="10200" target="10215" cy:directed="1"/>
      <edge id="14278" label="0010000010 (1) 0000000010" source="10199" target="10214" cy:directed="1"/>
      <edge id="14277" label="1110000010 (1) 1100000010" source="10198" target="10208" cy:directed="1"/>
      <edge id="14276" label="0110000000 (1) 0110000010" source="10197" target="10196" cy:directed="1"/>
      <edge id="14275" label="0110000000 (1) 0100000000" source="10197" target="10206" cy:directed="1"/>
      <edge id="14274" label="0110000000 (1) 0010000000" source="10197" target="10200" cy:directed="1"/>
      <edge id="14273" label="0110000010 (1) 0100000010" source="10196" target="10205" cy:directed="1"/>
      <edge id="14272" label="0110000010 (1) 0010000010" source="10196" target="10199" cy:directed="1"/>
      <edge id="14271" label="1001000010 (1) 1101000010" source="10194" target="10193" cy:directed="1"/>
      <edge id="14270" label="1101000010 (1) 1101100010" source="10193" target="9959" cy:directed="1"/>
      <edge id="14269" label="1101100000 (1) 1101110000" source="10192" target="10149" cy:directed="1"/>
      <edge id="14268" label="0101000010 (1) 0101100010" source="10191" target="9955" cy:directed="1"/>
      <edge id="14267" label="0101000010 (1) 0001000010" source="10191" target="10195" cy:directed="1"/>
      <edge id="14266" label="0101100000 (1) 0101110000" source="10190" target="10144" cy:directed="1"/>
      <edge id="14265" label="0101100000 (1) 0001100000" source="10190" target="10172" cy:directed="1"/>
      <edge id="14264" label="1011000000 (1) 1011000010" source="10189" target="10188" cy:directed="1"/>
      <edge id="14263" label="1011000000 (1) 1010000000" source="10189" target="10203" cy:directed="1"/>
      <edge id="14262" label="1011000000 (1) 1001000000" source="10189" target="10210" cy:directed="1"/>
      <edge id="14261" label="1011000000 (1) 1111000000" source="10189" target="10187" cy:directed="1"/>
      <edge id="14260" label="1011000010 (1) 1010000010" source="10188" target="10202" cy:directed="1"/>
      <edge id="14259" label="1011000010 (1) 1001000010" source="10188" target="10194" cy:directed="1"/>
      <edge id="14258" label="1011000010 (1) 1111000010" source="10188" target="10184" cy:directed="1"/>
      <edge id="14257" label="1111000000 (1) 1111000010" source="10187" target="10184" cy:directed="1"/>
      <edge id="14256" label="1111000000 (1) 1111100000" source="10187" target="10183" cy:directed="1"/>
      <edge id="14255" label="1111000000 (1) 1110000000" source="10187" target="10201" cy:directed="1"/>
      <edge id="14254" label="1111000000 (1) 1101000000" source="10187" target="10207" cy:directed="1"/>
      <edge id="14253" label="0011000000 (1) 0011000010" source="10186" target="10185" cy:directed="1"/>
      <edge id="14252" label="0011000000 (1) 0010000000" source="10186" target="10200" cy:directed="1"/>
      <edge id="14251" label="0011000000 (1) 0001000000" source="10186" target="10213" cy:directed="1"/>
      <edge id="14250" label="0011000010 (1) 0010000010" source="10185" target="10199" cy:directed="1"/>
      <edge id="14249" label="0011000010 (1) 0001000010" source="10185" target="10195" cy:directed="1"/>
      <edge id="14248" label="1111000010 (1) 1111100010" source="10184" target="9927" cy:directed="1"/>
      <edge id="14247" label="1111000010 (1) 1110000010" source="10184" target="10198" cy:directed="1"/>
      <edge id="14246" label="1111000010 (1) 1101000010" source="10184" target="10193" cy:directed="1"/>
      <edge id="14245" label="1111100000 (1) 1111110000" source="10183" target="10131" cy:directed="1"/>
      <edge id="14244" label="1111100000 (1) 1110100000" source="10183" target="10166" cy:directed="1"/>
      <edge id="14243" label="1111100000 (1) 1101100000" source="10183" target="10192" cy:directed="1"/>
      <edge id="14242" label="0111000000 (1) 0111000010" source="10182" target="10181" cy:directed="1"/>
      <edge id="14241" label="0111000000 (1) 0111100000" source="10182" target="10180" cy:directed="1"/>
      <edge id="14240" label="0111000000 (1) 0110000000" source="10182" target="10197" cy:directed="1"/>
      <edge id="14239" label="0111000000 (1) 0101000000" source="10182" target="10204" cy:directed="1"/>
      <edge id="14238" label="0111000000 (1) 0011000000" source="10182" target="10186" cy:directed="1"/>
      <edge id="14237" label="0111000010 (1) 0111100010" source="10181" target="9922" cy:directed="1"/>
      <edge id="14236" label="0111000010 (1) 0110000010" source="10181" target="10196" cy:directed="1"/>
      <edge id="14235" label="0111000010 (1) 0101000010" source="10181" target="10191" cy:directed="1"/>
      <edge id="14234" label="0111000010 (1) 0011000010" source="10181" target="10185" cy:directed="1"/>
      <edge id="14233" label="0111100000 (1) 0111110000" source="10180" target="10127" cy:directed="1"/>
      <edge id="14232" label="0111100000 (1) 0110100000" source="10180" target="10163" cy:directed="1"/>
      <edge id="14231" label="0111100000 (1) 0101100000" source="10180" target="10190" cy:directed="1"/>
      <edge id="14230" label="0111100000 (1) 0011100000" source="10180" target="10154" cy:directed="1"/>
      <edge id="14229" label="1000100000 (1) 1000110000" source="10179" target="10178" cy:directed="1"/>
      <edge id="14228" label="1000100000 (1) 1000000000" source="10179" target="10212" cy:directed="1"/>
      <edge id="14227" label="1000100000 (1) 1001100000" source="10179" target="10177" cy:directed="1"/>
      <edge id="14226" label="1000100000 (1) 1010100000" source="10179" target="10176" cy:directed="1"/>
      <edge id="14225" label="1000100000 (1) 1100100000" source="10179" target="10175" cy:directed="1"/>
      <edge id="14224" label="1000110000 (1) 1000111000" source="10178" target="10086" cy:directed="1"/>
      <edge id="14223" label="1000110000 (1) 1000010000" source="10178" target="10159" cy:directed="1"/>
      <edge id="14222" label="1000110000 (1) 1001110000" source="10178" target="10161" cy:directed="1"/>
      <edge id="14221" label="1000110000 (1) 1010110000" source="10178" target="10167" cy:directed="1"/>
      <edge id="14220" label="1001100000 (1) 1001110000" source="10177" target="10161" cy:directed="1"/>
      <edge id="14219" label="1001100000 (1) 1001000000" source="10177" target="10210" cy:directed="1"/>
      <edge id="14218" label="1001100000 (1) 1011100000" source="10177" target="10160" cy:directed="1"/>
      <edge id="14217" label="1001100000 (1) 1101100000" source="10177" target="10192" cy:directed="1"/>
      <edge id="14216" label="1010100000 (1) 1010110000" source="10176" target="10167" cy:directed="1"/>
      <edge id="14215" label="1010100000 (1) 1010000000" source="10176" target="10203" cy:directed="1"/>
      <edge id="14214" label="1010100000 (1) 1110100000" source="10176" target="10166" cy:directed="1"/>
      <edge id="14213" label="1100100000 (1) 1100110000" source="10175" target="10170" cy:directed="1"/>
      <edge id="14212" label="1100100000 (1) 1100000000" source="10175" target="10209" cy:directed="1"/>
      <edge id="14211" label="1100100000 (1) 1101100000" source="10175" target="10192" cy:directed="1"/>
      <edge id="14210" label="0000100000 (1) 0000110000" source="10174" target="10173" cy:directed="1"/>
      <edge id="14209" label="0000100000 (1) 0000000000" source="10174" target="10215" cy:directed="1"/>
      <edge id="14208" label="0000100000 (1) 0001100000" source="10174" target="10172" cy:directed="1"/>
      <edge id="14207" label="0000100000 (1) 0010100000" source="10174" target="10171" cy:directed="1"/>
      <edge id="14206" label="0000110000 (1) 0000111000" source="10173" target="10084" cy:directed="1"/>
      <edge id="14205" label="0000110000 (1) 0000010000" source="10173" target="10153" cy:directed="1"/>
      <edge id="14204" label="0000110000 (1) 0001110000" source="10173" target="10155" cy:directed="1"/>
      <edge id="14203" label="0000110000 (1) 0010110000" source="10173" target="10165" cy:directed="1"/>
      <edge id="14202" label="0001100000 (1) 0001110000" source="10172" target="10155" cy:directed="1"/>
      <edge id="14201" label="0001100000 (1) 0001000000" source="10172" target="10213" cy:directed="1"/>
      <edge id="14200" label="0001100000 (1) 0011100000" source="10172" target="10154" cy:directed="1"/>
      <edge id="14199" label="0010100000 (1) 0010110000" source="10171" target="10165" cy:directed="1"/>
      <edge id="14198" label="0010100000 (1) 0010000000" source="10171" target="10200" cy:directed="1"/>
      <edge id="14197" label="1100110000 (1) 1100111000" source="10170" target="10081" cy:directed="1"/>
      <edge id="14196" label="1100110000 (1) 1100010000" source="10170" target="10148" cy:directed="1"/>
      <edge id="14195" label="1100110000 (1) 1101110000" source="10170" target="10149" cy:directed="1"/>
      <edge id="14194" label="1100110000 (1) 1000110000" source="10170" target="10178" cy:directed="1"/>
      <edge id="14193" label="0100100000 (1) 0100110000" source="10169" target="10168" cy:directed="1"/>
      <edge id="14192" label="0100100000 (1) 0100000000" source="10169" target="10206" cy:directed="1"/>
      <edge id="14191" label="0100100000 (1) 0101100000" source="10169" target="10190" cy:directed="1"/>
      <edge id="14190" label="0100100000 (1) 0000100000" source="10169" target="10174" cy:directed="1"/>
      <edge id="14189" label="0100110000 (1) 0100111000" source="10168" target="10080" cy:directed="1"/>
      <edge id="14188" label="0100110000 (1) 0100010000" source="10168" target="10143" cy:directed="1"/>
      <edge id="14187" label="0100110000 (1) 0101110000" source="10168" target="10144" cy:directed="1"/>
      <edge id="14186" label="0100110000 (1) 0000110000" source="10168" target="10173" cy:directed="1"/>
      <edge id="14185" label="1010110000 (1) 1010111000" source="10167" target="10079" cy:directed="1"/>
      <edge id="14184" label="1010110000 (1) 1010010000" source="10167" target="10138" cy:directed="1"/>
      <edge id="14183" label="1110100000 (1) 1110110000" source="10166" target="10164" cy:directed="1"/>
      <edge id="14182" label="1110100000 (1) 1110000000" source="10166" target="10201" cy:directed="1"/>
      <edge id="14181" label="1110100000 (1) 1100100000" source="10166" target="10175" cy:directed="1"/>
      <edge id="14180" label="0010110000 (1) 0010111000" source="10165" target="10077" cy:directed="1"/>
      <edge id="14179" label="0010110000 (1) 0010010000" source="10165" target="10134" cy:directed="1"/>
      <edge id="14178" label="1110110000 (1) 1110111000" source="10164" target="10075" cy:directed="1"/>
      <edge id="14177" label="1110110000 (1) 1110010000" source="10164" target="10130" cy:directed="1"/>
      <edge id="14176" label="1110110000 (1) 1100110000" source="10164" target="10170" cy:directed="1"/>
      <edge id="14175" label="1110110000 (1) 1010110000" source="10164" target="10167" cy:directed="1"/>
      <edge id="14174" label="0110100000 (1) 0110110000" source="10163" target="10162" cy:directed="1"/>
      <edge id="14173" label="0110100000 (1) 0110000000" source="10163" target="10197" cy:directed="1"/>
      <edge id="14172" label="0110100000 (1) 0100100000" source="10163" target="10169" cy:directed="1"/>
      <edge id="14171" label="0110100000 (1) 0010100000" source="10163" target="10171" cy:directed="1"/>
      <edge id="14170" label="0110110000 (1) 0110111000" source="10162" target="10072" cy:directed="1"/>
      <edge id="14169" label="0110110000 (1) 0110010000" source="10162" target="10126" cy:directed="1"/>
      <edge id="14168" label="0110110000 (1) 0100110000" source="10162" target="10168" cy:directed="1"/>
      <edge id="14167" label="0110110000 (1) 0010110000" source="10162" target="10165" cy:directed="1"/>
      <edge id="14166" label="1001110000 (1) 1001111000" source="10161" target="10053" cy:directed="1"/>
      <edge id="14165" label="1001110000 (1) 1001010000" source="10161" target="10156" cy:directed="1"/>
      <edge id="14164" label="1001110000 (1) 1011110000" source="10161" target="10139" cy:directed="1"/>
      <edge id="14163" label="1011100000 (1) 1011110000" source="10160" target="10139" cy:directed="1"/>
      <edge id="14162" label="1011100000 (1) 1011000000" source="10160" target="10189" cy:directed="1"/>
      <edge id="14161" label="1011100000 (1) 1010100000" source="10160" target="10176" cy:directed="1"/>
      <edge id="14160" label="1011100000 (1) 1111100000" source="10160" target="10183" cy:directed="1"/>
      <edge id="14159" label="1000010000 (1) 1000010010" source="10159" target="10158" cy:directed="1"/>
      <edge id="14158" label="1000010000 (1) 1000011000" source="10159" target="10157" cy:directed="1"/>
      <edge id="14157" label="1000010000 (1) 1000000000" source="10159" target="10212" cy:directed="1"/>
      <edge id="14156" label="1000010000 (1) 1001010000" source="10159" target="10156" cy:directed="1"/>
      <edge id="14155" label="1000010010 (1) 1000000010" source="10158" target="10211" cy:directed="1"/>
      <edge id="14154" label="1000010010 (1) 1001010010" source="10158" target="10123" cy:directed="1"/>
      <edge id="14153" label="1000011000 (1) 1000011010" source="10157" target="10001" cy:directed="1"/>
      <edge id="14152" label="1000011000 (1) 1000011100" source="10157" target="10000" cy:directed="1"/>
      <edge id="14151" label="1000011000 (1) 1000001000" source="10157" target="10115" cy:directed="1"/>
      <edge id="14150" label="1000011000 (1) 1001011000" source="10157" target="10122" cy:directed="1"/>
      <edge id="14149" label="1001010000 (1) 1001010010" source="10156" target="10123" cy:directed="1"/>
      <edge id="14148" label="1001010000 (1) 1001011000" source="10156" target="10122" cy:directed="1"/>
      <edge id="14147" label="1001010000 (1) 1001000000" source="10156" target="10210" cy:directed="1"/>
      <edge id="14146" label="0001110000 (1) 0001111000" source="10155" target="10046" cy:directed="1"/>
      <edge id="14145" label="0001110000 (1) 0001010000" source="10155" target="10150" cy:directed="1"/>
      <edge id="14144" label="0001110000 (1) 0011110000" source="10155" target="10135" cy:directed="1"/>
      <edge id="14143" label="0011100000 (1) 0011110000" source="10154" target="10135" cy:directed="1"/>
      <edge id="14142" label="0011100000 (1) 0011000000" source="10154" target="10186" cy:directed="1"/>
      <edge id="14141" label="0011100000 (1) 0010100000" source="10154" target="10171" cy:directed="1"/>
      <edge id="14140" label="0000010000 (1) 0000010010" source="10153" target="10152" cy:directed="1"/>
      <edge id="14139" label="0000010000 (1) 0000011000" source="10153" target="10151" cy:directed="1"/>
      <edge id="14138" label="0000010000 (1) 0000000000" source="10153" target="10215" cy:directed="1"/>
      <edge id="14137" label="0000010000 (1) 0001010000" source="10153" target="10150" cy:directed="1"/>
      <edge id="14136" label="0000010010 (1) 0000000010" source="10152" target="10214" cy:directed="1"/>
      <edge id="14135" label="0000010010 (1) 0001010010" source="10152" target="10121" cy:directed="1"/>
      <edge id="14134" label="0000011000 (1) 0000011010" source="10151" target="9999" cy:directed="1"/>
      <edge id="14133" label="0000011000 (1) 0000011100" source="10151" target="9998" cy:directed="1"/>
      <edge id="14132" label="0000011000 (1) 0000001000" source="10151" target="10111" cy:directed="1"/>
      <edge id="14131" label="0000011000 (1) 0001011000" source="10151" target="10120" cy:directed="1"/>
      <edge id="14130" label="0001010000 (1) 0001010010" source="10150" target="10121" cy:directed="1"/>
      <edge id="14129" label="0001010000 (1) 0001011000" source="10150" target="10120" cy:directed="1"/>
      <edge id="14128" label="0001010000 (1) 0001000000" source="10150" target="10213" cy:directed="1"/>
      <edge id="14127" label="1101110000 (1) 1101111000" source="10149" target="10037" cy:directed="1"/>
      <edge id="14126" label="1101110000 (1) 1001110000" source="10149" target="10161" cy:directed="1"/>
      <edge id="14125" label="1100010000 (1) 1100010010" source="10148" target="10147" cy:directed="1"/>
      <edge id="14124" label="1100010000 (1) 1100011000" source="10148" target="10146" cy:directed="1"/>
      <edge id="14123" label="1100010000 (1) 1100000000" source="10148" target="10209" cy:directed="1"/>
      <edge id="14122" label="1100010000 (1) 1101010000" source="10148" target="10145" cy:directed="1"/>
      <edge id="14121" label="1100010000 (1) 1000010000" source="10148" target="10159" cy:directed="1"/>
      <edge id="14120" label="1100010010 (1) 1100000010" source="10147" target="10208" cy:directed="1"/>
      <edge id="14119" label="1100010010 (1) 1101010010" source="10147" target="10119" cy:directed="1"/>
      <edge id="14118" label="1100010010 (1) 1000010010" source="10147" target="10158" cy:directed="1"/>
      <edge id="14117" label="1100011000 (1) 1100011010" source="10146" target="9995" cy:directed="1"/>
      <edge id="14116" label="1100011000 (1) 1100011100" source="10146" target="9994" cy:directed="1"/>
      <edge id="14115" label="1100011000 (1) 1100001000" source="10146" target="10112" cy:directed="1"/>
      <edge id="14114" label="1100011000 (1) 1101011000" source="10146" target="10118" cy:directed="1"/>
      <edge id="14113" label="1100011000 (1) 1000011000" source="10146" target="10157" cy:directed="1"/>
      <edge id="14112" label="1101010000 (1) 1101010010" source="10145" target="10119" cy:directed="1"/>
      <edge id="14111" label="1101010000 (1) 1101011000" source="10145" target="10118" cy:directed="1"/>
      <edge id="14110" label="1101010000 (1) 1101000000" source="10145" target="10207" cy:directed="1"/>
      <edge id="14109" label="1101010000 (1) 1101110000" source="10145" target="10149" cy:directed="1"/>
      <edge id="14108" label="1101010000 (1) 1001010000" source="10145" target="10156" cy:directed="1"/>
      <edge id="14107" label="0101110000 (1) 0101111000" source="10144" target="10036" cy:directed="1"/>
      <edge id="14106" label="0101110000 (1) 0001110000" source="10144" target="10155" cy:directed="1"/>
      <edge id="14105" label="0100010000 (1) 0100010010" source="10143" target="10142" cy:directed="1"/>
      <edge id="14104" label="0100010000 (1) 0100011000" source="10143" target="10141" cy:directed="1"/>
      <edge id="14103" label="0100010000 (1) 0100000000" source="10143" target="10206" cy:directed="1"/>
      <edge id="14102" label="0100010000 (1) 0101010000" source="10143" target="10140" cy:directed="1"/>
      <edge id="14101" label="0100010000 (1) 0000010000" source="10143" target="10153" cy:directed="1"/>
      <edge id="14100" label="0100010010 (1) 0100000010" source="10142" target="10205" cy:directed="1"/>
      <edge id="14099" label="0100010010 (1) 0101010010" source="10142" target="10117" cy:directed="1"/>
      <edge id="14098" label="0100010010 (1) 0000010010" source="10142" target="10152" cy:directed="1"/>
      <edge id="14097" label="0100011000 (1) 0100011010" source="10141" target="9989" cy:directed="1"/>
      <edge id="14096" label="0100011000 (1) 0100011100" source="10141" target="9988" cy:directed="1"/>
      <edge id="14095" label="0100011000 (1) 0100001000" source="10141" target="10106" cy:directed="1"/>
      <edge id="14094" label="0100011000 (1) 0101011000" source="10141" target="10116" cy:directed="1"/>
      <edge id="14093" label="0100011000 (1) 0000011000" source="10141" target="10151" cy:directed="1"/>
      <edge id="14092" label="0101010000 (1) 0101010010" source="10140" target="10117" cy:directed="1"/>
      <edge id="14091" label="0101010000 (1) 0101011000" source="10140" target="10116" cy:directed="1"/>
      <edge id="14090" label="0101010000 (1) 0101000000" source="10140" target="10204" cy:directed="1"/>
      <edge id="14089" label="0101010000 (1) 0101110000" source="10140" target="10144" cy:directed="1"/>
      <edge id="14088" label="0101010000 (1) 0001010000" source="10140" target="10150" cy:directed="1"/>
      <edge id="14087" label="1011110000 (1) 1011111000" source="10139" target="10023" cy:directed="1"/>
      <edge id="14086" label="1011110000 (1) 1011010000" source="10139" target="10103" cy:directed="1"/>
      <edge id="14085" label="1011110000 (1) 1010110000" source="10139" target="10167" cy:directed="1"/>
      <edge id="14084" label="1010010000 (1) 1010010010" source="10138" target="10137" cy:directed="1"/>
      <edge id="14083" label="1010010000 (1) 1010011000" source="10138" target="10136" cy:directed="1"/>
      <edge id="14082" label="1010010000 (1) 1010000000" source="10138" target="10203" cy:directed="1"/>
      <edge id="14081" label="1010010000 (1) 1000010000" source="10138" target="10159" cy:directed="1"/>
      <edge id="14080" label="1010010010 (1) 1010000010" source="10137" target="10202" cy:directed="1"/>
      <edge id="14079" label="1010010010 (1) 1000010010" source="10137" target="10158" cy:directed="1"/>
      <edge id="14078" label="1010011000 (1) 1010011010" source="10136" target="9982" cy:directed="1"/>
      <edge id="14077" label="1010011000 (1) 1010011100" source="10136" target="9981" cy:directed="1"/>
      <edge id="14076" label="1010011000 (1) 1010001000" source="10136" target="10091" cy:directed="1"/>
      <edge id="14075" label="1010011000 (1) 1000011000" source="10136" target="10157" cy:directed="1"/>
      <edge id="14074" label="0011110000 (1) 0011111000" source="10135" target="10020" cy:directed="1"/>
      <edge id="14073" label="0011110000 (1) 0011010000" source="10135" target="10100" cy:directed="1"/>
      <edge id="14072" label="0011110000 (1) 0010110000" source="10135" target="10165" cy:directed="1"/>
      <edge id="14071" label="0010010000 (1) 0010010010" source="10134" target="10133" cy:directed="1"/>
      <edge id="14070" label="0010010000 (1) 0010011000" source="10134" target="10132" cy:directed="1"/>
      <edge id="14069" label="0010010000 (1) 0010000000" source="10134" target="10200" cy:directed="1"/>
      <edge id="14068" label="0010010000 (1) 0000010000" source="10134" target="10153" cy:directed="1"/>
      <edge id="14067" label="0010010010 (1) 0010000010" source="10133" target="10199" cy:directed="1"/>
      <edge id="14066" label="0010010010 (1) 0000010010" source="10133" target="10152" cy:directed="1"/>
      <edge id="14065" label="0010011000 (1) 0010011010" source="10132" target="9980" cy:directed="1"/>
      <edge id="14064" label="0010011000 (1) 0010011100" source="10132" target="9979" cy:directed="1"/>
      <edge id="14063" label="0010011000 (1) 0010001000" source="10132" target="10088" cy:directed="1"/>
      <edge id="14062" label="0010011000 (1) 0000011000" source="10132" target="10151" cy:directed="1"/>
      <edge id="14061" label="1111110000 (1) 1111111000" source="10131" target="10017" cy:directed="1"/>
      <edge id="14060" label="1111110000 (1) 1110110000" source="10131" target="10164" cy:directed="1"/>
      <edge id="14059" label="1111110000 (1) 1101110000" source="10131" target="10149" cy:directed="1"/>
      <edge id="14058" label="1111110000 (1) 1011110000" source="10131" target="10139" cy:directed="1"/>
      <edge id="14057" label="1110010000 (1) 1110010010" source="10130" target="10129" cy:directed="1"/>
      <edge id="14056" label="1110010000 (1) 1110011000" source="10130" target="10128" cy:directed="1"/>
      <edge id="14055" label="1110010000 (1) 1110000000" source="10130" target="10201" cy:directed="1"/>
      <edge id="14054" label="1110010000 (1) 1100010000" source="10130" target="10148" cy:directed="1"/>
      <edge id="14053" label="1110010000 (1) 1010010000" source="10130" target="10138" cy:directed="1"/>
      <edge id="14052" label="1110010010 (1) 1110000010" source="10129" target="10198" cy:directed="1"/>
      <edge id="14051" label="1110010010 (1) 1100010010" source="10129" target="10147" cy:directed="1"/>
      <edge id="14050" label="1110010010 (1) 1010010010" source="10129" target="10137" cy:directed="1"/>
      <edge id="14049" label="1110011000 (1) 1110011010" source="10128" target="9977" cy:directed="1"/>
      <edge id="14048" label="1110011000 (1) 1110011100" source="10128" target="9976" cy:directed="1"/>
      <edge id="14047" label="1110011000 (1) 1110001000" source="10128" target="10089" cy:directed="1"/>
      <edge id="14046" label="1110011000 (1) 1100011000" source="10128" target="10146" cy:directed="1"/>
      <edge id="14045" label="1110011000 (1) 1010011000" source="10128" target="10136" cy:directed="1"/>
      <edge id="14044" label="0111110000 (1) 0111111000" source="10127" target="10016" cy:directed="1"/>
      <edge id="14043" label="0111110000 (1) 0110110000" source="10127" target="10162" cy:directed="1"/>
      <edge id="14042" label="0111110000 (1) 0101110000" source="10127" target="10144" cy:directed="1"/>
      <edge id="14041" label="0111110000 (1) 0011110000" source="10127" target="10135" cy:directed="1"/>
      <edge id="14040" label="0110010000 (1) 0110010010" source="10126" target="10125" cy:directed="1"/>
      <edge id="14039" label="0110010000 (1) 0110011000" source="10126" target="10124" cy:directed="1"/>
      <edge id="14038" label="0110010000 (1) 0110000000" source="10126" target="10197" cy:directed="1"/>
      <edge id="14037" label="0110010000 (1) 0100010000" source="10126" target="10143" cy:directed="1"/>
      <edge id="14036" label="0110010000 (1) 0010010000" source="10126" target="10134" cy:directed="1"/>
      <edge id="14035" label="0110010010 (1) 0110000010" source="10125" target="10196" cy:directed="1"/>
      <edge id="14034" label="0110010010 (1) 0100010010" source="10125" target="10142" cy:directed="1"/>
      <edge id="14033" label="0110010010 (1) 0010010010" source="10125" target="10133" cy:directed="1"/>
      <edge id="14032" label="0110011000 (1) 0110011010" source="10124" target="9974" cy:directed="1"/>
      <edge id="14031" label="0110011000 (1) 0110011100" source="10124" target="9973" cy:directed="1"/>
      <edge id="14030" label="0110011000 (1) 0110001000" source="10124" target="10083" cy:directed="1"/>
      <edge id="14029" label="0110011000 (1) 0100011000" source="10124" target="10141" cy:directed="1"/>
      <edge id="14028" label="0110011000 (1) 0010011000" source="10124" target="10132" cy:directed="1"/>
      <edge id="14027" label="1001010010 (1) 1001000010" source="10123" target="10194" cy:directed="1"/>
      <edge id="14026" label="1001011000 (1) 1001011010" source="10122" target="9968" cy:directed="1"/>
      <edge id="14025" label="1001011000 (1) 1001011100" source="10122" target="9967" cy:directed="1"/>
      <edge id="14024" label="1001011000 (1) 1001001000" source="10122" target="10113" cy:directed="1"/>
      <edge id="14023" label="0001010010 (1) 0001000010" source="10121" target="10195" cy:directed="1"/>
      <edge id="14022" label="0001011000 (1) 0001011010" source="10120" target="9966" cy:directed="1"/>
      <edge id="14021" label="0001011000 (1) 0001011100" source="10120" target="9965" cy:directed="1"/>
      <edge id="14020" label="0001011000 (1) 0001001000" source="10120" target="10109" cy:directed="1"/>
      <edge id="14019" label="1101010010 (1) 1101000010" source="10119" target="10193" cy:directed="1"/>
      <edge id="14018" label="1101010010 (1) 1101110010" source="10119" target="9827" cy:directed="1"/>
      <edge id="14017" label="1101010010 (1) 1001010010" source="10119" target="10123" cy:directed="1"/>
      <edge id="14016" label="1101011000 (1) 1101011010" source="10118" target="9963" cy:directed="1"/>
      <edge id="14015" label="1101011000 (1) 1101011100" source="10118" target="9962" cy:directed="1"/>
      <edge id="14014" label="1101011000 (1) 1101001000" source="10118" target="10107" cy:directed="1"/>
      <edge id="14013" label="1101011000 (1) 1101111000" source="10118" target="10037" cy:directed="1"/>
      <edge id="14012" label="1101011000 (1) 1001011000" source="10118" target="10122" cy:directed="1"/>
      <edge id="14011" label="0101010010 (1) 0101000010" source="10117" target="10191" cy:directed="1"/>
      <edge id="14010" label="0101010010 (1) 0101110010" source="10117" target="9818" cy:directed="1"/>
      <edge id="14009" label="0101010010 (1) 0001010010" source="10117" target="10121" cy:directed="1"/>
      <edge id="14008" label="0101011000 (1) 0101011010" source="10116" target="9961" cy:directed="1"/>
      <edge id="14007" label="0101011000 (1) 0101011100" source="10116" target="9960" cy:directed="1"/>
      <edge id="14006" label="0101011000 (1) 0101001000" source="10116" target="10104" cy:directed="1"/>
      <edge id="14005" label="0101011000 (1) 0101111000" source="10116" target="10036" cy:directed="1"/>
      <edge id="14004" label="0101011000 (1) 0001011000" source="10116" target="10120" cy:directed="1"/>
      <edge id="14003" label="1000001000 (1) 1000001010" source="10115" target="10114" cy:directed="1"/>
      <edge id="14002" label="1000001000 (1) 1000000000" source="10115" target="10212" cy:directed="1"/>
      <edge id="14001" label="1000001000 (1) 1001001000" source="10115" target="10113" cy:directed="1"/>
      <edge id="14000" label="1000001000 (1) 1100001000" source="10115" target="10112" cy:directed="1"/>
      <edge id="13999" label="1000001010 (1) 1000000010" source="10114" target="10211" cy:directed="1"/>
      <edge id="13998" label="1000001010 (1) 1001001010" source="10114" target="10078" cy:directed="1"/>
      <edge id="13997" label="1000001010 (1) 1100001010" source="10114" target="10108" cy:directed="1"/>
      <edge id="13996" label="1001001000 (1) 1001001010" source="10113" target="10078" cy:directed="1"/>
      <edge id="13995" label="1001001000 (1) 1001000000" source="10113" target="10210" cy:directed="1"/>
      <edge id="13994" label="1001001000 (1) 1101001000" source="10113" target="10107" cy:directed="1"/>
      <edge id="13993" label="1100001000 (1) 1100001010" source="10112" target="10108" cy:directed="1"/>
      <edge id="13992" label="1100001000 (1) 1100000000" source="10112" target="10209" cy:directed="1"/>
      <edge id="13991" label="1100001000 (1) 1101001000" source="10112" target="10107" cy:directed="1"/>
      <edge id="13990" label="0000001000 (1) 0000001010" source="10111" target="10110" cy:directed="1"/>
      <edge id="13989" label="0000001000 (1) 0000000000" source="10111" target="10215" cy:directed="1"/>
      <edge id="13988" label="0000001000 (1) 0001001000" source="10111" target="10109" cy:directed="1"/>
      <edge id="13987" label="0000001010 (1) 0000000010" source="10110" target="10214" cy:directed="1"/>
      <edge id="13986" label="0000001010 (1) 0001001010" source="10110" target="10076" cy:directed="1"/>
      <edge id="13985" label="0001001000 (1) 0001001010" source="10109" target="10076" cy:directed="1"/>
      <edge id="13984" label="0001001000 (1) 0001000000" source="10109" target="10213" cy:directed="1"/>
      <edge id="13983" label="1100001010 (1) 1100000010" source="10108" target="10208" cy:directed="1"/>
      <edge id="13982" label="1100001010 (1) 1101001010" source="10108" target="10074" cy:directed="1"/>
      <edge id="13981" label="1101001000 (1) 1101001010" source="10107" target="10074" cy:directed="1"/>
      <edge id="13980" label="1101001000 (1) 1101000000" source="10107" target="10207" cy:directed="1"/>
      <edge id="13979" label="1101001000 (1) 1101101000" source="10107" target="10073" cy:directed="1"/>
      <edge id="13978" label="0100001000 (1) 0100001010" source="10106" target="10105" cy:directed="1"/>
      <edge id="13977" label="0100001000 (1) 0100000000" source="10106" target="10206" cy:directed="1"/>
      <edge id="13976" label="0100001000 (1) 0101001000" source="10106" target="10104" cy:directed="1"/>
      <edge id="13975" label="0100001000 (1) 0000001000" source="10106" target="10111" cy:directed="1"/>
      <edge id="13974" label="0100001010 (1) 0100000010" source="10105" target="10205" cy:directed="1"/>
      <edge id="13973" label="0100001010 (1) 0101001010" source="10105" target="10071" cy:directed="1"/>
      <edge id="13972" label="0100001010 (1) 0000001010" source="10105" target="10110" cy:directed="1"/>
      <edge id="13971" label="0101001000 (1) 0101001010" source="10104" target="10071" cy:directed="1"/>
      <edge id="13970" label="0101001000 (1) 0101000000" source="10104" target="10204" cy:directed="1"/>
      <edge id="13969" label="0101001000 (1) 0101101000" source="10104" target="10070" cy:directed="1"/>
      <edge id="13968" label="0101001000 (1) 0001001000" source="10104" target="10109" cy:directed="1"/>
      <edge id="13967" label="1011010000 (1) 1011010010" source="10103" target="10102" cy:directed="1"/>
      <edge id="13966" label="1011010000 (1) 1011011000" source="10103" target="10101" cy:directed="1"/>
      <edge id="13965" label="1011010000 (1) 1011000000" source="10103" target="10189" cy:directed="1"/>
      <edge id="13964" label="1011010000 (1) 1010010000" source="10103" target="10138" cy:directed="1"/>
      <edge id="13963" label="1011010000 (1) 1001010000" source="10103" target="10156" cy:directed="1"/>
      <edge id="13962" label="1011010010 (1) 1011000010" source="10102" target="10188" cy:directed="1"/>
      <edge id="13961" label="1011010010 (1) 1010010010" source="10102" target="10137" cy:directed="1"/>
      <edge id="13960" label="1011010010 (1) 1001010010" source="10102" target="10123" cy:directed="1"/>
      <edge id="13959" label="1011011000 (1) 1011011010" source="10101" target="9957" cy:directed="1"/>
      <edge id="13958" label="1011011000 (1) 1011011100" source="10101" target="9956" cy:directed="1"/>
      <edge id="13957" label="1011011000 (1) 1011001000" source="10101" target="10063" cy:directed="1"/>
      <edge id="13956" label="1011011000 (1) 1010011000" source="10101" target="10136" cy:directed="1"/>
      <edge id="13955" label="1011011000 (1) 1001011000" source="10101" target="10122" cy:directed="1"/>
      <edge id="13954" label="0011010000 (1) 0011010010" source="10100" target="10099" cy:directed="1"/>
      <edge id="13953" label="0011010000 (1) 0011011000" source="10100" target="10098" cy:directed="1"/>
      <edge id="13952" label="0011010000 (1) 0011000000" source="10100" target="10186" cy:directed="1"/>
      <edge id="13951" label="0011010000 (1) 0010010000" source="10100" target="10134" cy:directed="1"/>
      <edge id="13950" label="0011010000 (1) 0001010000" source="10100" target="10150" cy:directed="1"/>
      <edge id="13949" label="0011010010 (1) 0011000010" source="10099" target="10185" cy:directed="1"/>
      <edge id="13948" label="0011010010 (1) 0010010010" source="10099" target="10133" cy:directed="1"/>
      <edge id="13947" label="0011010010 (1) 0001010010" source="10099" target="10121" cy:directed="1"/>
      <edge id="13946" label="0011011000 (1) 0011011010" source="10098" target="9953" cy:directed="1"/>
      <edge id="13945" label="0011011000 (1) 0011011100" source="10098" target="9952" cy:directed="1"/>
      <edge id="13944" label="0011011000 (1) 0011001000" source="10098" target="10055" cy:directed="1"/>
      <edge id="13943" label="0011011000 (1) 0010011000" source="10098" target="10132" cy:directed="1"/>
      <edge id="13942" label="0011011000 (1) 0001011000" source="10098" target="10120" cy:directed="1"/>
      <edge id="13941" label="0111010000 (1) 0111010010" source="10097" target="10096" cy:directed="1"/>
      <edge id="13940" label="0111010000 (1) 0111011000" source="10097" target="10095" cy:directed="1"/>
      <edge id="13939" label="0111010000 (1) 0111000000" source="10097" target="10182" cy:directed="1"/>
      <edge id="13938" label="0111010000 (1) 0111110000" source="10097" target="10127" cy:directed="1"/>
      <edge id="13937" label="0111010000 (1) 0110010000" source="10097" target="10126" cy:directed="1"/>
      <edge id="13936" label="0111010000 (1) 0101010000" source="10097" target="10140" cy:directed="1"/>
      <edge id="13935" label="0111010000 (1) 0011010000" source="10097" target="10100" cy:directed="1"/>
      <edge id="13934" label="0111010010 (1) 0111000010" source="10096" target="10181" cy:directed="1"/>
      <edge id="13933" label="0111010010 (1) 0111110010" source="10096" target="9799" cy:directed="1"/>
      <edge id="13932" label="0111010010 (1) 0110010010" source="10096" target="10125" cy:directed="1"/>
      <edge id="13931" label="0111010010 (1) 0101010010" source="10096" target="10117" cy:directed="1"/>
      <edge id="13930" label="0111010010 (1) 0011010010" source="10096" target="10099" cy:directed="1"/>
      <edge id="13929" label="0111011000 (1) 0111011010" source="10095" target="9941" cy:directed="1"/>
      <edge id="13928" label="0111011000 (1) 0111011100" source="10095" target="9940" cy:directed="1"/>
      <edge id="13927" label="0111011000 (1) 0111001000" source="10095" target="10040" cy:directed="1"/>
      <edge id="13926" label="0111011000 (1) 0111111000" source="10095" target="10016" cy:directed="1"/>
      <edge id="13925" label="0111011000 (1) 0110011000" source="10095" target="10124" cy:directed="1"/>
      <edge id="13924" label="0111011000 (1) 0101011000" source="10095" target="10116" cy:directed="1"/>
      <edge id="13923" label="0111011000 (1) 0011011000" source="10095" target="10098" cy:directed="1"/>
      <edge id="13922" label="1111010000 (1) 1111010010" source="10094" target="10093" cy:directed="1"/>
      <edge id="13921" label="1111010000 (1) 1111011000" source="10094" target="10092" cy:directed="1"/>
      <edge id="13920" label="1111010000 (1) 1111000000" source="10094" target="10187" cy:directed="1"/>
      <edge id="13919" label="1111010000 (1) 1111110000" source="10094" target="10131" cy:directed="1"/>
      <edge id="13918" label="1111010000 (1) 1110010000" source="10094" target="10130" cy:directed="1"/>
      <edge id="13917" label="1111010000 (1) 1101010000" source="10094" target="10145" cy:directed="1"/>
      <edge id="13916" label="1111010000 (1) 1011010000" source="10094" target="10103" cy:directed="1"/>
      <edge id="13915" label="1111010010 (1) 1111000010" source="10093" target="10184" cy:directed="1"/>
      <edge id="13914" label="1111010010 (1) 1111110010" source="10093" target="9807" cy:directed="1"/>
      <edge id="13913" label="1111010010 (1) 1110010010" source="10093" target="10129" cy:directed="1"/>
      <edge id="13912" label="1111010010 (1) 1101010010" source="10093" target="10119" cy:directed="1"/>
      <edge id="13911" label="1111010010 (1) 1011010010" source="10093" target="10102" cy:directed="1"/>
      <edge id="13910" label="1111011000 (1) 1111011010" source="10092" target="9939" cy:directed="1"/>
      <edge id="13909" label="1111011000 (1) 1111011100" source="10092" target="9938" cy:directed="1"/>
      <edge id="13908" label="1111011000 (1) 1111001000" source="10092" target="10061" cy:directed="1"/>
      <edge id="13907" label="1111011000 (1) 1111111000" source="10092" target="10017" cy:directed="1"/>
      <edge id="13906" label="1111011000 (1) 1110011000" source="10092" target="10128" cy:directed="1"/>
      <edge id="13905" label="1111011000 (1) 1101011000" source="10092" target="10118" cy:directed="1"/>
      <edge id="13904" label="1111011000 (1) 1011011000" source="10092" target="10101" cy:directed="1"/>
      <edge id="13903" label="1010001000 (1) 1010001010" source="10091" target="10090" cy:directed="1"/>
      <edge id="13902" label="1010001000 (1) 1010000000" source="10091" target="10203" cy:directed="1"/>
      <edge id="13901" label="1010001000 (1) 1000001000" source="10091" target="10115" cy:directed="1"/>
      <edge id="13900" label="1010001000 (1) 1110001000" source="10091" target="10089" cy:directed="1"/>
      <edge id="13899" label="1010001010 (1) 1010000010" source="10090" target="10202" cy:directed="1"/>
      <edge id="13898" label="1010001010 (1) 1000001010" source="10090" target="10114" cy:directed="1"/>
      <edge id="13897" label="1010001010 (1) 1110001010" source="10090" target="10085" cy:directed="1"/>
      <edge id="13896" label="1110001000 (1) 1110001010" source="10089" target="10085" cy:directed="1"/>
      <edge id="13895" label="1110001000 (1) 1110000000" source="10089" target="10201" cy:directed="1"/>
      <edge id="13894" label="1110001000 (1) 1100001000" source="10089" target="10112" cy:directed="1"/>
      <edge id="13893" label="0010001000 (1) 0010001010" source="10088" target="10087" cy:directed="1"/>
      <edge id="13892" label="0010001000 (1) 0010000000" source="10088" target="10200" cy:directed="1"/>
      <edge id="13891" label="0010001000 (1) 0000001000" source="10088" target="10111" cy:directed="1"/>
      <edge id="13890" label="0010001010 (1) 0010000010" source="10087" target="10199" cy:directed="1"/>
      <edge id="13889" label="0010001010 (1) 0000001010" source="10087" target="10110" cy:directed="1"/>
      <edge id="13888" label="1000111000 (1) 1000111100" source="10086" target="9929" cy:directed="1"/>
      <edge id="13887" label="1000111000 (1) 1000011000" source="10086" target="10157" cy:directed="1"/>
      <edge id="13886" label="1000111000 (1) 1001111000" source="10086" target="10053" cy:directed="1"/>
      <edge id="13885" label="1000111000 (1) 1010111000" source="10086" target="10079" cy:directed="1"/>
      <edge id="13884" label="1110001010 (1) 1110000010" source="10085" target="10198" cy:directed="1"/>
      <edge id="13883" label="1110001010 (1) 1100001010" source="10085" target="10108" cy:directed="1"/>
      <edge id="13882" label="0000111000 (1) 0000111100" source="10084" target="9928" cy:directed="1"/>
      <edge id="13881" label="0000111000 (1) 0000011000" source="10084" target="10151" cy:directed="1"/>
      <edge id="13880" label="0000111000 (1) 0001111000" source="10084" target="10046" cy:directed="1"/>
      <edge id="13879" label="0000111000 (1) 0010111000" source="10084" target="10077" cy:directed="1"/>
      <edge id="13878" label="0110001000 (1) 0110001010" source="10083" target="10082" cy:directed="1"/>
      <edge id="13877" label="0110001000 (1) 0110000000" source="10083" target="10197" cy:directed="1"/>
      <edge id="13876" label="0110001000 (1) 0100001000" source="10083" target="10106" cy:directed="1"/>
      <edge id="13875" label="0110001000 (1) 0010001000" source="10083" target="10088" cy:directed="1"/>
      <edge id="13874" label="0110001010 (1) 0110000010" source="10082" target="10196" cy:directed="1"/>
      <edge id="13873" label="0110001010 (1) 0100001010" source="10082" target="10105" cy:directed="1"/>
      <edge id="13872" label="0110001010 (1) 0010001010" source="10082" target="10087" cy:directed="1"/>
      <edge id="13871" label="1100111000 (1) 1100111100" source="10081" target="9926" cy:directed="1"/>
      <edge id="13870" label="1100111000 (1) 1100011000" source="10081" target="10146" cy:directed="1"/>
      <edge id="13869" label="1100111000 (1) 1101111000" source="10081" target="10037" cy:directed="1"/>
      <edge id="13868" label="1100111000 (1) 1000111000" source="10081" target="10086" cy:directed="1"/>
      <edge id="13867" label="0100111000 (1) 0100111100" source="10080" target="9923" cy:directed="1"/>
      <edge id="13866" label="0100111000 (1) 0100011000" source="10080" target="10141" cy:directed="1"/>
      <edge id="13865" label="0100111000 (1) 0101111000" source="10080" target="10036" cy:directed="1"/>
      <edge id="13864" label="0100111000 (1) 0000111000" source="10080" target="10084" cy:directed="1"/>
      <edge id="13863" label="1010111000 (1) 1010111100" source="10079" target="9906" cy:directed="1"/>
      <edge id="13862" label="1010111000 (1) 1010011000" source="10079" target="10136" cy:directed="1"/>
      <edge id="13861" label="1001001010 (1) 1001000010" source="10078" target="10194" cy:directed="1"/>
      <edge id="13860" label="1001001010 (1) 1101001010" source="10078" target="10074" cy:directed="1"/>
      <edge id="13859" label="0010111000 (1) 0010111100" source="10077" target="9904" cy:directed="1"/>
      <edge id="13858" label="0010111000 (1) 0010011000" source="10077" target="10132" cy:directed="1"/>
      <edge id="13857" label="0001001010 (1) 0001000010" source="10076" target="10195" cy:directed="1"/>
      <edge id="13856" label="1110111000 (1) 1110111100" source="10075" target="9892" cy:directed="1"/>
      <edge id="13855" label="1110111000 (1) 1110011000" source="10075" target="10128" cy:directed="1"/>
      <edge id="13854" label="1110111000 (1) 1100111000" source="10075" target="10081" cy:directed="1"/>
      <edge id="13853" label="1110111000 (1) 1010111000" source="10075" target="10079" cy:directed="1"/>
      <edge id="13852" label="1101001010 (1) 1101000010" source="10074" target="10193" cy:directed="1"/>
      <edge id="13851" label="1101001010 (1) 1101101010" source="10074" target="9708" cy:directed="1"/>
      <edge id="13850" label="1101101000 (1) 1101100000" source="10073" target="10192" cy:directed="1"/>
      <edge id="13849" label="1101101000 (1) 1101111000" source="10073" target="10037" cy:directed="1"/>
      <edge id="13848" label="0110111000 (1) 0110111100" source="10072" target="9891" cy:directed="1"/>
      <edge id="13847" label="0110111000 (1) 0110011000" source="10072" target="10124" cy:directed="1"/>
      <edge id="13846" label="0110111000 (1) 0100111000" source="10072" target="10080" cy:directed="1"/>
      <edge id="13845" label="0110111000 (1) 0010111000" source="10072" target="10077" cy:directed="1"/>
      <edge id="13844" label="0101001010 (1) 0101000010" source="10071" target="10191" cy:directed="1"/>
      <edge id="13843" label="0101001010 (1) 0101101010" source="10071" target="9703" cy:directed="1"/>
      <edge id="13842" label="0101001010 (1) 0001001010" source="10071" target="10076" cy:directed="1"/>
      <edge id="13841" label="0101101000 (1) 0101100000" source="10070" target="10190" cy:directed="1"/>
      <edge id="13840" label="0101101000 (1) 0101111000" source="10070" target="10036" cy:directed="1"/>
      <edge id="13839" label="0101101000 (1) 0001101000" source="10070" target="10034" cy:directed="1"/>
      <edge id="13838" label="1000000100 (1) 1000000110" source="10069" target="10068" cy:directed="1"/>
      <edge id="13837" label="1000000100 (1) 1000000000" source="10069" target="10212" cy:directed="1"/>
      <edge id="13836" label="1000000100 (1) 1000100100" source="10069" target="10067" cy:directed="1"/>
      <edge id="13835" label="1000000100 (1) 1001000100" source="10069" target="10066" cy:directed="1"/>
      <edge id="13834" label="1000000100 (1) 1010000100" source="10069" target="10065" cy:directed="1"/>
      <edge id="13833" label="1000000100 (1) 1100000100" source="10069" target="10064" cy:directed="1"/>
      <edge id="13832" label="1000000110 (1) 1000000010" source="10068" target="10211" cy:directed="1"/>
      <edge id="13831" label="1000000110 (1) 1000100110" source="10068" target="9677" cy:directed="1"/>
      <edge id="13830" label="1000000110 (1) 1001000110" source="10068" target="10013" cy:directed="1"/>
      <edge id="13829" label="1000000110 (1) 1010000110" source="10068" target="10028" cy:directed="1"/>
      <edge id="13828" label="1000000110 (1) 1100000110" source="10068" target="10052" cy:directed="1"/>
      <edge id="13827" label="1000100100 (1) 1000100000" source="10067" target="10179" cy:directed="1"/>
      <edge id="13826" label="1000100100 (1) 1000110100" source="10067" target="9983" cy:directed="1"/>
      <edge id="13825" label="1000100100 (1) 1001100100" source="10067" target="10012" cy:directed="1"/>
      <edge id="13824" label="1000100100 (1) 1010100100" source="10067" target="10027" cy:directed="1"/>
      <edge id="13823" label="1000100100 (1) 1100100100" source="10067" target="10051" cy:directed="1"/>
      <edge id="13822" label="1001000100 (1) 1001000110" source="10066" target="10013" cy:directed="1"/>
      <edge id="13821" label="1001000100 (1) 1001000000" source="10066" target="10210" cy:directed="1"/>
      <edge id="13820" label="1001000100 (1) 1001100100" source="10066" target="10012" cy:directed="1"/>
      <edge id="13819" label="1001000100 (1) 1011000100" source="10066" target="10011" cy:directed="1"/>
      <edge id="13818" label="1001000100 (1) 1101000100" source="10066" target="10050" cy:directed="1"/>
      <edge id="13817" label="1010000100 (1) 1010000110" source="10065" target="10028" cy:directed="1"/>
      <edge id="13816" label="1010000100 (1) 1010000000" source="10065" target="10203" cy:directed="1"/>
      <edge id="13815" label="1010000100 (1) 1010100100" source="10065" target="10027" cy:directed="1"/>
      <edge id="13814" label="1010000100 (1) 1110000100" source="10065" target="10049" cy:directed="1"/>
      <edge id="13813" label="1100000100 (1) 1100000110" source="10064" target="10052" cy:directed="1"/>
      <edge id="13812" label="1100000100 (1) 1100000000" source="10064" target="10209" cy:directed="1"/>
      <edge id="13811" label="1100000100 (1) 1100100100" source="10064" target="10051" cy:directed="1"/>
      <edge id="13810" label="1100000100 (1) 1101000100" source="10064" target="10050" cy:directed="1"/>
      <edge id="13809" label="1100000100 (1) 1110000100" source="10064" target="10049" cy:directed="1"/>
      <edge id="13808" label="1011001000 (1) 1011001010" source="10063" target="10062" cy:directed="1"/>
      <edge id="13807" label="1011001000 (1) 1011000000" source="10063" target="10189" cy:directed="1"/>
      <edge id="13806" label="1011001000 (1) 1010001000" source="10063" target="10091" cy:directed="1"/>
      <edge id="13805" label="1011001000 (1) 1001001000" source="10063" target="10113" cy:directed="1"/>
      <edge id="13804" label="1011001000 (1) 1111001000" source="10063" target="10061" cy:directed="1"/>
      <edge id="13803" label="1011001010 (1) 1011000010" source="10062" target="10188" cy:directed="1"/>
      <edge id="13802" label="1011001010 (1) 1010001010" source="10062" target="10090" cy:directed="1"/>
      <edge id="13801" label="1011001010 (1) 1001001010" source="10062" target="10078" cy:directed="1"/>
      <edge id="13800" label="1011001010 (1) 1111001010" source="10062" target="10048" cy:directed="1"/>
      <edge id="13799" label="1111001000 (1) 1111001010" source="10061" target="10048" cy:directed="1"/>
      <edge id="13798" label="1111001000 (1) 1111000000" source="10061" target="10187" cy:directed="1"/>
      <edge id="13797" label="1111001000 (1) 1111101000" source="10061" target="10047" cy:directed="1"/>
      <edge id="13796" label="1111001000 (1) 1110001000" source="10061" target="10089" cy:directed="1"/>
      <edge id="13795" label="1111001000 (1) 1101001000" source="10061" target="10107" cy:directed="1"/>
      <edge id="13794" label="0000000100 (1) 0000000110" source="10060" target="10059" cy:directed="1"/>
      <edge id="13793" label="0000000100 (1) 0000000000" source="10060" target="10215" cy:directed="1"/>
      <edge id="13792" label="0000000100 (1) 0000100100" source="10060" target="10058" cy:directed="1"/>
      <edge id="13791" label="0000000100 (1) 0001000100" source="10060" target="10057" cy:directed="1"/>
      <edge id="13790" label="0000000100 (1) 0010000100" source="10060" target="10056" cy:directed="1"/>
      <edge id="13789" label="0000000110 (1) 0000000010" source="10059" target="10214" cy:directed="1"/>
      <edge id="13788" label="0000000110 (1) 0000100110" source="10059" target="9676" cy:directed="1"/>
      <edge id="13787" label="0000000110 (1) 0001000110" source="10059" target="10010" cy:directed="1"/>
      <edge id="13786" label="0000000110 (1) 0010000110" source="10059" target="10026" cy:directed="1"/>
      <edge id="13785" label="0000100100 (1) 0000100000" source="10058" target="10174" cy:directed="1"/>
      <edge id="13784" label="0000100100 (1) 0000110100" source="10058" target="9978" cy:directed="1"/>
      <edge id="13783" label="0000100100 (1) 0001100100" source="10058" target="10009" cy:directed="1"/>
      <edge id="13782" label="0000100100 (1) 0010100100" source="10058" target="10025" cy:directed="1"/>
      <edge id="13781" label="0001000100 (1) 0001000110" source="10057" target="10010" cy:directed="1"/>
      <edge id="13780" label="0001000100 (1) 0001000000" source="10057" target="10213" cy:directed="1"/>
      <edge id="13779" label="0001000100 (1) 0001100100" source="10057" target="10009" cy:directed="1"/>
      <edge id="13778" label="0001000100 (1) 0011000100" source="10057" target="10008" cy:directed="1"/>
      <edge id="13777" label="0010000100 (1) 0010000110" source="10056" target="10026" cy:directed="1"/>
      <edge id="13776" label="0010000100 (1) 0010000000" source="10056" target="10200" cy:directed="1"/>
      <edge id="13775" label="0010000100 (1) 0010100100" source="10056" target="10025" cy:directed="1"/>
      <edge id="13774" label="0011001000 (1) 0011001010" source="10055" target="10054" cy:directed="1"/>
      <edge id="13773" label="0011001000 (1) 0011000000" source="10055" target="10186" cy:directed="1"/>
      <edge id="13772" label="0011001000 (1) 0010001000" source="10055" target="10088" cy:directed="1"/>
      <edge id="13771" label="0011001000 (1) 0001001000" source="10055" target="10109" cy:directed="1"/>
      <edge id="13770" label="0011001010 (1) 0011000010" source="10054" target="10185" cy:directed="1"/>
      <edge id="13769" label="0011001010 (1) 0010001010" source="10054" target="10087" cy:directed="1"/>
      <edge id="13768" label="0011001010 (1) 0001001010" source="10054" target="10076" cy:directed="1"/>
      <edge id="13767" label="1001111000 (1) 1001111100" source="10053" target="9853" cy:directed="1"/>
      <edge id="13766" label="1001111000 (1) 1001011000" source="10053" target="10122" cy:directed="1"/>
      <edge id="13765" label="1001111000 (1) 1011111000" source="10053" target="10023" cy:directed="1"/>
      <edge id="13764" label="1100000110 (1) 1100000010" source="10052" target="10208" cy:directed="1"/>
      <edge id="13763" label="1100000110 (1) 1100100110" source="10052" target="9674" cy:directed="1"/>
      <edge id="13762" label="1100000110 (1) 1101000110" source="10052" target="10007" cy:directed="1"/>
      <edge id="13761" label="1100000110 (1) 1110000110" source="10052" target="10022" cy:directed="1"/>
      <edge id="13760" label="1100100100 (1) 1100100000" source="10051" target="10175" cy:directed="1"/>
      <edge id="13759" label="1100100100 (1) 1100110100" source="10051" target="9975" cy:directed="1"/>
      <edge id="13758" label="1100100100 (1) 1101100100" source="10051" target="10006" cy:directed="1"/>
      <edge id="13757" label="1100100100 (1) 1110100100" source="10051" target="10021" cy:directed="1"/>
      <edge id="13756" label="1101000100 (1) 1101000110" source="10050" target="10007" cy:directed="1"/>
      <edge id="13755" label="1101000100 (1) 1101000000" source="10050" target="10207" cy:directed="1"/>
      <edge id="13754" label="1101000100 (1) 1101100100" source="10050" target="10006" cy:directed="1"/>
      <edge id="13753" label="1101000100 (1) 1111000100" source="10050" target="10005" cy:directed="1"/>
      <edge id="13752" label="1110000100 (1) 1110000110" source="10049" target="10022" cy:directed="1"/>
      <edge id="13751" label="1110000100 (1) 1110000000" source="10049" target="10201" cy:directed="1"/>
      <edge id="13750" label="1110000100 (1) 1110100100" source="10049" target="10021" cy:directed="1"/>
      <edge id="13749" label="1111001010 (1) 1111000010" source="10048" target="10184" cy:directed="1"/>
      <edge id="13748" label="1111001010 (1) 1111101010" source="10048" target="9673" cy:directed="1"/>
      <edge id="13747" label="1111001010 (1) 1110001010" source="10048" target="10085" cy:directed="1"/>
      <edge id="13746" label="1111001010 (1) 1101001010" source="10048" target="10074" cy:directed="1"/>
      <edge id="13745" label="1111101000 (1) 1111100000" source="10047" target="10183" cy:directed="1"/>
      <edge id="13744" label="1111101000 (1) 1111111000" source="10047" target="10017" cy:directed="1"/>
      <edge id="13743" label="1111101000 (1) 1110101000" source="10047" target="10015" cy:directed="1"/>
      <edge id="13742" label="1111101000 (1) 1101101000" source="10047" target="10073" cy:directed="1"/>
      <edge id="13741" label="0001111000 (1) 0001111100" source="10046" target="9849" cy:directed="1"/>
      <edge id="13740" label="0001111000 (1) 0001011000" source="10046" target="10120" cy:directed="1"/>
      <edge id="13739" label="0001111000 (1) 0011111000" source="10046" target="10020" cy:directed="1"/>
      <edge id="13738" label="0100000100 (1) 0100000110" source="10045" target="10044" cy:directed="1"/>
      <edge id="13737" label="0100000100 (1) 0100000000" source="10045" target="10206" cy:directed="1"/>
      <edge id="13736" label="0100000100 (1) 0100100100" source="10045" target="10043" cy:directed="1"/>
      <edge id="13735" label="0100000100 (1) 0101000100" source="10045" target="10042" cy:directed="1"/>
      <edge id="13734" label="0100000100 (1) 0110000100" source="10045" target="10041" cy:directed="1"/>
      <edge id="13733" label="0100000100 (1) 0000000100" source="10045" target="10060" cy:directed="1"/>
      <edge id="13732" label="0100000110 (1) 0100000010" source="10044" target="10205" cy:directed="1"/>
      <edge id="13731" label="0100000110 (1) 0100100110" source="10044" target="9670" cy:directed="1"/>
      <edge id="13730" label="0100000110 (1) 0101000110" source="10044" target="10004" cy:directed="1"/>
      <edge id="13729" label="0100000110 (1) 0110000110" source="10044" target="10019" cy:directed="1"/>
      <edge id="13728" label="0100000110 (1) 0000000110" source="10044" target="10059" cy:directed="1"/>
      <edge id="13727" label="0100100100 (1) 0100100000" source="10043" target="10169" cy:directed="1"/>
      <edge id="13726" label="0100100100 (1) 0100110100" source="10043" target="9972" cy:directed="1"/>
      <edge id="13725" label="0100100100 (1) 0101100100" source="10043" target="10003" cy:directed="1"/>
      <edge id="13724" label="0100100100 (1) 0110100100" source="10043" target="10018" cy:directed="1"/>
      <edge id="13723" label="0100100100 (1) 0000100100" source="10043" target="10058" cy:directed="1"/>
      <edge id="13722" label="0101000100 (1) 0101000110" source="10042" target="10004" cy:directed="1"/>
      <edge id="13721" label="0101000100 (1) 0101000000" source="10042" target="10204" cy:directed="1"/>
      <edge id="13720" label="0101000100 (1) 0101100100" source="10042" target="10003" cy:directed="1"/>
      <edge id="13719" label="0101000100 (1) 0111000100" source="10042" target="10002" cy:directed="1"/>
      <edge id="13718" label="0101000100 (1) 0001000100" source="10042" target="10057" cy:directed="1"/>
      <edge id="13717" label="0110000100 (1) 0110000110" source="10041" target="10019" cy:directed="1"/>
      <edge id="13716" label="0110000100 (1) 0110000000" source="10041" target="10197" cy:directed="1"/>
      <edge id="13715" label="0110000100 (1) 0110100100" source="10041" target="10018" cy:directed="1"/>
      <edge id="13714" label="0110000100 (1) 0010000100" source="10041" target="10056" cy:directed="1"/>
      <edge id="13713" label="0111001000 (1) 0111001010" source="10040" target="10039" cy:directed="1"/>
      <edge id="13712" label="0111001000 (1) 0111000000" source="10040" target="10182" cy:directed="1"/>
      <edge id="13711" label="0111001000 (1) 0111101000" source="10040" target="10038" cy:directed="1"/>
      <edge id="13710" label="0111001000 (1) 0110001000" source="10040" target="10083" cy:directed="1"/>
      <edge id="13709" label="0111001000 (1) 0101001000" source="10040" target="10104" cy:directed="1"/>
      <edge id="13708" label="0111001000 (1) 0011001000" source="10040" target="10055" cy:directed="1"/>
      <edge id="13707" label="0111001010 (1) 0111000010" source="10039" target="10181" cy:directed="1"/>
      <edge id="13706" label="0111001010 (1) 0111101010" source="10039" target="9671" cy:directed="1"/>
      <edge id="13705" label="0111001010 (1) 0110001010" source="10039" target="10082" cy:directed="1"/>
      <edge id="13704" label="0111001010 (1) 0101001010" source="10039" target="10071" cy:directed="1"/>
      <edge id="13703" label="0111001010 (1) 0011001010" source="10039" target="10054" cy:directed="1"/>
      <edge id="13702" label="0111101000 (1) 0111100000" source="10038" target="10180" cy:directed="1"/>
      <edge id="13701" label="0111101000 (1) 0111111000" source="10038" target="10016" cy:directed="1"/>
      <edge id="13700" label="0111101000 (1) 0110101000" source="10038" target="10014" cy:directed="1"/>
      <edge id="13699" label="0111101000 (1) 0101101000" source="10038" target="10070" cy:directed="1"/>
      <edge id="13698" label="0111101000 (1) 0011101000" source="10038" target="9997" cy:directed="1"/>
      <edge id="13697" label="1101111000 (1) 1101111100" source="10037" target="9839" cy:directed="1"/>
      <edge id="13696" label="1101111000 (1) 1001111000" source="10037" target="10053" cy:directed="1"/>
      <edge id="13695" label="0101111000 (1) 0101111100" source="10036" target="9838" cy:directed="1"/>
      <edge id="13694" label="0101111000 (1) 0001111000" source="10036" target="10046" cy:directed="1"/>
      <edge id="13693" label="0000101000 (1) 0000100000" source="10035" target="10174" cy:directed="1"/>
      <edge id="13692" label="0000101000 (1) 0000111000" source="10035" target="10084" cy:directed="1"/>
      <edge id="13691" label="0000101000 (1) 0000001000" source="10035" target="10111" cy:directed="1"/>
      <edge id="13690" label="0000101000 (1) 0001101000" source="10035" target="10034" cy:directed="1"/>
      <edge id="13689" label="0000101000 (1) 0010101000" source="10035" target="10033" cy:directed="1"/>
      <edge id="13688" label="0001101000 (1) 0001100000" source="10034" target="10172" cy:directed="1"/>
      <edge id="13687" label="0001101000 (1) 0001111000" source="10034" target="10046" cy:directed="1"/>
      <edge id="13686" label="0001101000 (1) 0001001000" source="10034" target="10109" cy:directed="1"/>
      <edge id="13685" label="0001101000 (1) 0011101000" source="10034" target="9997" cy:directed="1"/>
      <edge id="13684" label="0010101000 (1) 0010100000" source="10033" target="10171" cy:directed="1"/>
      <edge id="13683" label="0010101000 (1) 0010111000" source="10033" target="10077" cy:directed="1"/>
      <edge id="13682" label="0010101000 (1) 0010001000" source="10033" target="10088" cy:directed="1"/>
      <edge id="13681" label="1000101000 (1) 1000100000" source="10032" target="10179" cy:directed="1"/>
      <edge id="13680" label="1000101000 (1) 1000111000" source="10032" target="10086" cy:directed="1"/>
      <edge id="13679" label="1000101000 (1) 1000001000" source="10032" target="10115" cy:directed="1"/>
      <edge id="13678" label="1000101000 (1) 1001101000" source="10032" target="10031" cy:directed="1"/>
      <edge id="13677" label="1000101000 (1) 1010101000" source="10032" target="10030" cy:directed="1"/>
      <edge id="13676" label="1000101000 (1) 1100101000" source="10032" target="10029" cy:directed="1"/>
      <edge id="13675" label="1001101000 (1) 1001100000" source="10031" target="10177" cy:directed="1"/>
      <edge id="13674" label="1001101000 (1) 1001111000" source="10031" target="10053" cy:directed="1"/>
      <edge id="13673" label="1001101000 (1) 1001001000" source="10031" target="10113" cy:directed="1"/>
      <edge id="13672" label="1001101000 (1) 1011101000" source="10031" target="9996" cy:directed="1"/>
      <edge id="13671" label="1001101000 (1) 1101101000" source="10031" target="10073" cy:directed="1"/>
      <edge id="13670" label="1010101000 (1) 1010100000" source="10030" target="10176" cy:directed="1"/>
      <edge id="13669" label="1010101000 (1) 1010111000" source="10030" target="10079" cy:directed="1"/>
      <edge id="13668" label="1010101000 (1) 1010001000" source="10030" target="10091" cy:directed="1"/>
      <edge id="13667" label="1010101000 (1) 1110101000" source="10030" target="10015" cy:directed="1"/>
      <edge id="13666" label="1100101000 (1) 1100100000" source="10029" target="10175" cy:directed="1"/>
      <edge id="13665" label="1100101000 (1) 1100111000" source="10029" target="10081" cy:directed="1"/>
      <edge id="13664" label="1100101000 (1) 1100001000" source="10029" target="10112" cy:directed="1"/>
      <edge id="13663" label="1100101000 (1) 1101101000" source="10029" target="10073" cy:directed="1"/>
      <edge id="13662" label="1010000110 (1) 1010000010" source="10028" target="10202" cy:directed="1"/>
      <edge id="13661" label="1010000110 (1) 1010100110" source="10028" target="9646" cy:directed="1"/>
      <edge id="13660" label="1010000110 (1) 1110000110" source="10028" target="10022" cy:directed="1"/>
      <edge id="13659" label="1010100100 (1) 1010100000" source="10027" target="10176" cy:directed="1"/>
      <edge id="13658" label="1010100100 (1) 1010110100" source="10027" target="9971" cy:directed="1"/>
      <edge id="13657" label="1010100100 (1) 1110100100" source="10027" target="10021" cy:directed="1"/>
      <edge id="13656" label="0010000110 (1) 0010000010" source="10026" target="10199" cy:directed="1"/>
      <edge id="13655" label="0010000110 (1) 0010100110" source="10026" target="9644" cy:directed="1"/>
      <edge id="13654" label="0010100100 (1) 0010100000" source="10025" target="10171" cy:directed="1"/>
      <edge id="13653" label="0010100100 (1) 0010110100" source="10025" target="9970" cy:directed="1"/>
      <edge id="13652" label="0100101000 (1) 0100100000" source="10024" target="10169" cy:directed="1"/>
      <edge id="13651" label="0100101000 (1) 0100111000" source="10024" target="10080" cy:directed="1"/>
      <edge id="13650" label="0100101000 (1) 0100001000" source="10024" target="10106" cy:directed="1"/>
      <edge id="13649" label="0100101000 (1) 0101101000" source="10024" target="10070" cy:directed="1"/>
      <edge id="13648" label="0100101000 (1) 0000101000" source="10024" target="10035" cy:directed="1"/>
      <edge id="13647" label="1011111000 (1) 1011111100" source="10023" target="9823" cy:directed="1"/>
      <edge id="13646" label="1011111000 (1) 1011011000" source="10023" target="10101" cy:directed="1"/>
      <edge id="13645" label="1011111000 (1) 1010111000" source="10023" target="10079" cy:directed="1"/>
      <edge id="13644" label="1110000110 (1) 1110000010" source="10022" target="10198" cy:directed="1"/>
      <edge id="13643" label="1110000110 (1) 1110100110" source="10022" target="9632" cy:directed="1"/>
      <edge id="13642" label="1110100100 (1) 1110100000" source="10021" target="10166" cy:directed="1"/>
      <edge id="13641" label="1110100100 (1) 1110110100" source="10021" target="9969" cy:directed="1"/>
      <edge id="13640" label="0011111000 (1) 0011111100" source="10020" target="9821" cy:directed="1"/>
      <edge id="13639" label="0011111000 (1) 0011011000" source="10020" target="10098" cy:directed="1"/>
      <edge id="13638" label="0011111000 (1) 0010111000" source="10020" target="10077" cy:directed="1"/>
      <edge id="13637" label="0110000110 (1) 0110000010" source="10019" target="10196" cy:directed="1"/>
      <edge id="13636" label="0110000110 (1) 0110100110" source="10019" target="9631" cy:directed="1"/>
      <edge id="13635" label="0110000110 (1) 0010000110" source="10019" target="10026" cy:directed="1"/>
      <edge id="13634" label="0110100100 (1) 0110100000" source="10018" target="10163" cy:directed="1"/>
      <edge id="13633" label="0110100100 (1) 0110110100" source="10018" target="9964" cy:directed="1"/>
      <edge id="13632" label="0110100100 (1) 0010100100" source="10018" target="10025" cy:directed="1"/>
      <edge id="13631" label="1111111000 (1) 1111111100" source="10017" target="9817" cy:directed="1"/>
      <edge id="13630" label="1111111000 (1) 1110111000" source="10017" target="10075" cy:directed="1"/>
      <edge id="13629" label="1111111000 (1) 1101111000" source="10017" target="10037" cy:directed="1"/>
      <edge id="13628" label="1111111000 (1) 1011111000" source="10017" target="10023" cy:directed="1"/>
      <edge id="13627" label="0111111000 (1) 0111111100" source="10016" target="9816" cy:directed="1"/>
      <edge id="13626" label="0111111000 (1) 0110111000" source="10016" target="10072" cy:directed="1"/>
      <edge id="13625" label="0111111000 (1) 0101111000" source="10016" target="10036" cy:directed="1"/>
      <edge id="13624" label="0111111000 (1) 0011111000" source="10016" target="10020" cy:directed="1"/>
      <edge id="13623" label="1110101000 (1) 1110100000" source="10015" target="10166" cy:directed="1"/>
      <edge id="13622" label="1110101000 (1) 1110111000" source="10015" target="10075" cy:directed="1"/>
      <edge id="13621" label="1110101000 (1) 1110001000" source="10015" target="10089" cy:directed="1"/>
      <edge id="13620" label="1110101000 (1) 1100101000" source="10015" target="10029" cy:directed="1"/>
      <edge id="13619" label="0110101000 (1) 0110100000" source="10014" target="10163" cy:directed="1"/>
      <edge id="13618" label="0110101000 (1) 0110111000" source="10014" target="10072" cy:directed="1"/>
      <edge id="13617" label="0110101000 (1) 0110001000" source="10014" target="10083" cy:directed="1"/>
      <edge id="13616" label="0110101000 (1) 0100101000" source="10014" target="10024" cy:directed="1"/>
      <edge id="13615" label="0110101000 (1) 0010101000" source="10014" target="10033" cy:directed="1"/>
      <edge id="13614" label="1001000110 (1) 1001000010" source="10013" target="10194" cy:directed="1"/>
      <edge id="13613" label="1001000110 (1) 1001100110" source="10013" target="9590" cy:directed="1"/>
      <edge id="13612" label="1001000110 (1) 1011000110" source="10013" target="9993" cy:directed="1"/>
      <edge id="13611" label="1001000110 (1) 1101000110" source="10013" target="10007" cy:directed="1"/>
      <edge id="13610" label="1001100100 (1) 1001100000" source="10012" target="10177" cy:directed="1"/>
      <edge id="13609" label="1001100100 (1) 1001110100" source="10012" target="9958" cy:directed="1"/>
      <edge id="13608" label="1001100100 (1) 1011100100" source="10012" target="9992" cy:directed="1"/>
      <edge id="13607" label="1001100100 (1) 1101100100" source="10012" target="10006" cy:directed="1"/>
      <edge id="13606" label="1011000100 (1) 1011000110" source="10011" target="9993" cy:directed="1"/>
      <edge id="13605" label="1011000100 (1) 1011000000" source="10011" target="10189" cy:directed="1"/>
      <edge id="13604" label="1011000100 (1) 1011100100" source="10011" target="9992" cy:directed="1"/>
      <edge id="13603" label="1011000100 (1) 1010000100" source="10011" target="10065" cy:directed="1"/>
      <edge id="13602" label="1011000100 (1) 1111000100" source="10011" target="10005" cy:directed="1"/>
      <edge id="13601" label="0001000110 (1) 0001000010" source="10010" target="10195" cy:directed="1"/>
      <edge id="13600" label="0001000110 (1) 0001100110" source="10010" target="9589" cy:directed="1"/>
      <edge id="13599" label="0001000110 (1) 0011000110" source="10010" target="9991" cy:directed="1"/>
      <edge id="13598" label="0001100100 (1) 0001100000" source="10009" target="10172" cy:directed="1"/>
      <edge id="13597" label="0001100100 (1) 0001110100" source="10009" target="9954" cy:directed="1"/>
      <edge id="13596" label="0001100100 (1) 0011100100" source="10009" target="9990" cy:directed="1"/>
      <edge id="13595" label="0011000100 (1) 0011000110" source="10008" target="9991" cy:directed="1"/>
      <edge id="13594" label="0011000100 (1) 0011000000" source="10008" target="10186" cy:directed="1"/>
      <edge id="13593" label="0011000100 (1) 0011100100" source="10008" target="9990" cy:directed="1"/>
      <edge id="13592" label="0011000100 (1) 0010000100" source="10008" target="10056" cy:directed="1"/>
      <edge id="13591" label="1101000110 (1) 1101000010" source="10007" target="10193" cy:directed="1"/>
      <edge id="13590" label="1101000110 (1) 1101100110" source="10007" target="9578" cy:directed="1"/>
      <edge id="13589" label="1101000110 (1) 1111000110" source="10007" target="9987" cy:directed="1"/>
      <edge id="13588" label="1101100100 (1) 1101100000" source="10006" target="10192" cy:directed="1"/>
      <edge id="13587" label="1101100100 (1) 1101110100" source="10006" target="9943" cy:directed="1"/>
      <edge id="13586" label="1101100100 (1) 1111100100" source="10006" target="9986" cy:directed="1"/>
      <edge id="13585" label="1111000100 (1) 1111000110" source="10005" target="9987" cy:directed="1"/>
      <edge id="13584" label="1111000100 (1) 1111000000" source="10005" target="10187" cy:directed="1"/>
      <edge id="13583" label="1111000100 (1) 1111100100" source="10005" target="9986" cy:directed="1"/>
      <edge id="13582" label="1111000100 (1) 1110000100" source="10005" target="10049" cy:directed="1"/>
      <edge id="13581" label="0101000110 (1) 0101000010" source="10004" target="10191" cy:directed="1"/>
      <edge id="13580" label="0101000110 (1) 0101100110" source="10004" target="9576" cy:directed="1"/>
      <edge id="13579" label="0101000110 (1) 0111000110" source="10004" target="9985" cy:directed="1"/>
      <edge id="13578" label="0101000110 (1) 0001000110" source="10004" target="10010" cy:directed="1"/>
      <edge id="13577" label="0101100100 (1) 0101100000" source="10003" target="10190" cy:directed="1"/>
      <edge id="13576" label="0101100100 (1) 0101110100" source="10003" target="9942" cy:directed="1"/>
      <edge id="13575" label="0101100100 (1) 0111100100" source="10003" target="9984" cy:directed="1"/>
      <edge id="13574" label="0101100100 (1) 0001100100" source="10003" target="10009" cy:directed="1"/>
      <edge id="13573" label="0111000100 (1) 0111000110" source="10002" target="9985" cy:directed="1"/>
      <edge id="13572" label="0111000100 (1) 0111000000" source="10002" target="10182" cy:directed="1"/>
      <edge id="13571" label="0111000100 (1) 0111100100" source="10002" target="9984" cy:directed="1"/>
      <edge id="13570" label="0111000100 (1) 0110000100" source="10002" target="10041" cy:directed="1"/>
      <edge id="13569" label="0111000100 (1) 0011000100" source="10002" target="10008" cy:directed="1"/>
      <edge id="13568" label="1000011010 (1) 1000011110" source="10001" target="9707" cy:directed="1"/>
      <edge id="13567" label="1000011010 (1) 1000010010" source="10001" target="10158" cy:directed="1"/>
      <edge id="13566" label="1000011010 (1) 1000001010" source="10001" target="10114" cy:directed="1"/>
      <edge id="13565" label="1000011010 (1) 1001011010" source="10001" target="9968" cy:directed="1"/>
      <edge id="13564" label="1000011100 (1) 1000011110" source="10000" target="9707" cy:directed="1"/>
      <edge id="13563" label="1000011100 (1) 1000001100" source="10000" target="9871" cy:directed="1"/>
      <edge id="13562" label="1000011100 (1) 1001011100" source="10000" target="9967" cy:directed="1"/>
      <edge id="13561" label="1000011100 (1) 1010011100" source="10000" target="9981" cy:directed="1"/>
      <edge id="13560" label="0000011010 (1) 0000011110" source="9999" target="9709" cy:directed="1"/>
      <edge id="13559" label="0000011010 (1) 0000010010" source="9999" target="10152" cy:directed="1"/>
      <edge id="13558" label="0000011010 (1) 0000001010" source="9999" target="10110" cy:directed="1"/>
      <edge id="13557" label="0000011010 (1) 0001011010" source="9999" target="9966" cy:directed="1"/>
      <edge id="13556" label="0000011100 (1) 0000011110" source="9998" target="9709" cy:directed="1"/>
      <edge id="13555" label="0000011100 (1) 0000001100" source="9998" target="9866" cy:directed="1"/>
      <edge id="13554" label="0000011100 (1) 0001011100" source="9998" target="9965" cy:directed="1"/>
      <edge id="13553" label="0000011100 (1) 0010011100" source="9998" target="9979" cy:directed="1"/>
      <edge id="13552" label="0011101000 (1) 0011100000" source="9997" target="10154" cy:directed="1"/>
      <edge id="13551" label="0011101000 (1) 0011111000" source="9997" target="10020" cy:directed="1"/>
      <edge id="13550" label="0011101000 (1) 0011001000" source="9997" target="10055" cy:directed="1"/>
      <edge id="13549" label="0011101000 (1) 0010101000" source="9997" target="10033" cy:directed="1"/>
      <edge id="13548" label="1011101000 (1) 1011100000" source="9996" target="10160" cy:directed="1"/>
      <edge id="13547" label="1011101000 (1) 1011111000" source="9996" target="10023" cy:directed="1"/>
      <edge id="13546" label="1011101000 (1) 1011001000" source="9996" target="10063" cy:directed="1"/>
      <edge id="13545" label="1011101000 (1) 1010101000" source="9996" target="10030" cy:directed="1"/>
      <edge id="13544" label="1011101000 (1) 1111101000" source="9996" target="10047" cy:directed="1"/>
      <edge id="13543" label="1100011010 (1) 1100011110" source="9995" target="9691" cy:directed="1"/>
      <edge id="13542" label="1100011010 (1) 1100010010" source="9995" target="10147" cy:directed="1"/>
      <edge id="13541" label="1100011010 (1) 1100001010" source="9995" target="10108" cy:directed="1"/>
      <edge id="13540" label="1100011010 (1) 1101011010" source="9995" target="9963" cy:directed="1"/>
      <edge id="13539" label="1100011010 (1) 1000011010" source="9995" target="10001" cy:directed="1"/>
      <edge id="13538" label="1100011100 (1) 1100011110" source="9994" target="9691" cy:directed="1"/>
      <edge id="13537" label="1100011100 (1) 1100001100" source="9994" target="9867" cy:directed="1"/>
      <edge id="13536" label="1100011100 (1) 1101011100" source="9994" target="9962" cy:directed="1"/>
      <edge id="13535" label="1100011100 (1) 1110011100" source="9994" target="9976" cy:directed="1"/>
      <edge id="13534" label="1100011100 (1) 1000011100" source="9994" target="10000" cy:directed="1"/>
      <edge id="13533" label="1011000110 (1) 1011000010" source="9993" target="10188" cy:directed="1"/>
      <edge id="13532" label="1011000110 (1) 1011100110" source="9993" target="9560" cy:directed="1"/>
      <edge id="13531" label="1011000110 (1) 1010000110" source="9993" target="10028" cy:directed="1"/>
      <edge id="13530" label="1011000110 (1) 1111000110" source="9993" target="9987" cy:directed="1"/>
      <edge id="13529" label="1011100100 (1) 1011100000" source="9992" target="10160" cy:directed="1"/>
      <edge id="13528" label="1011100100 (1) 1011110100" source="9992" target="9925" cy:directed="1"/>
      <edge id="13527" label="1011100100 (1) 1010100100" source="9992" target="10027" cy:directed="1"/>
      <edge id="13526" label="1011100100 (1) 1111100100" source="9992" target="9986" cy:directed="1"/>
      <edge id="13525" label="0011000110 (1) 0011000010" source="9991" target="10185" cy:directed="1"/>
      <edge id="13524" label="0011000110 (1) 0011100110" source="9991" target="9555" cy:directed="1"/>
      <edge id="13523" label="0011000110 (1) 0010000110" source="9991" target="10026" cy:directed="1"/>
      <edge id="13522" label="0011100100 (1) 0011100000" source="9990" target="10154" cy:directed="1"/>
      <edge id="13521" label="0011100100 (1) 0011110100" source="9990" target="9924" cy:directed="1"/>
      <edge id="13520" label="0011100100 (1) 0010100100" source="9990" target="10025" cy:directed="1"/>
      <edge id="13519" label="0100011010 (1) 0100011110" source="9989" target="9690" cy:directed="1"/>
      <edge id="13518" label="0100011010 (1) 0100010010" source="9989" target="10142" cy:directed="1"/>
      <edge id="13517" label="0100011010 (1) 0100001010" source="9989" target="10105" cy:directed="1"/>
      <edge id="13516" label="0100011010 (1) 0101011010" source="9989" target="9961" cy:directed="1"/>
      <edge id="13515" label="0100011010 (1) 0000011010" source="9989" target="9999" cy:directed="1"/>
      <edge id="13514" label="0100011100 (1) 0100011110" source="9988" target="9690" cy:directed="1"/>
      <edge id="13513" label="0100011100 (1) 0100001100" source="9988" target="9848" cy:directed="1"/>
      <edge id="13512" label="0100011100 (1) 0101011100" source="9988" target="9960" cy:directed="1"/>
      <edge id="13511" label="0100011100 (1) 0110011100" source="9988" target="9973" cy:directed="1"/>
      <edge id="13510" label="0100011100 (1) 0000011100" source="9988" target="9998" cy:directed="1"/>
      <edge id="13509" label="1111000110 (1) 1111000010" source="9987" target="10184" cy:directed="1"/>
      <edge id="13508" label="1111000110 (1) 1111100110" source="9987" target="9553" cy:directed="1"/>
      <edge id="13507" label="1111000110 (1) 1110000110" source="9987" target="10022" cy:directed="1"/>
      <edge id="13506" label="1111100100 (1) 1111100000" source="9986" target="10183" cy:directed="1"/>
      <edge id="13505" label="1111100100 (1) 1111110100" source="9986" target="9919" cy:directed="1"/>
      <edge id="13504" label="1111100100 (1) 1110100100" source="9986" target="10021" cy:directed="1"/>
      <edge id="13503" label="0111000110 (1) 0111000010" source="9985" target="10181" cy:directed="1"/>
      <edge id="13502" label="0111000110 (1) 0111100110" source="9985" target="9552" cy:directed="1"/>
      <edge id="13501" label="0111000110 (1) 0110000110" source="9985" target="10019" cy:directed="1"/>
      <edge id="13500" label="0111000110 (1) 0011000110" source="9985" target="9991" cy:directed="1"/>
      <edge id="13499" label="0111100100 (1) 0111100000" source="9984" target="10180" cy:directed="1"/>
      <edge id="13498" label="0111100100 (1) 0111110100" source="9984" target="9918" cy:directed="1"/>
      <edge id="13497" label="0111100100 (1) 0110100100" source="9984" target="10018" cy:directed="1"/>
      <edge id="13496" label="0111100100 (1) 0011100100" source="9984" target="9990" cy:directed="1"/>
      <edge id="13495" label="1000110100 (1) 1000110000" source="9983" target="10178" cy:directed="1"/>
      <edge id="13494" label="1000110100 (1) 1000111100" source="9983" target="9929" cy:directed="1"/>
      <edge id="13493" label="1000110100 (1) 1001110100" source="9983" target="9958" cy:directed="1"/>
      <edge id="13492" label="1000110100 (1) 1010110100" source="9983" target="9971" cy:directed="1"/>
      <edge id="13491" label="1010011010 (1) 1010011110" source="9982" target="9675" cy:directed="1"/>
      <edge id="13490" label="1010011010 (1) 1010010010" source="9982" target="10137" cy:directed="1"/>
      <edge id="13489" label="1010011010 (1) 1010001010" source="9982" target="10090" cy:directed="1"/>
      <edge id="13488" label="1010011010 (1) 1000011010" source="9982" target="10001" cy:directed="1"/>
      <edge id="13487" label="1010011100 (1) 1010011110" source="9981" target="9675" cy:directed="1"/>
      <edge id="13486" label="1010011100 (1) 1010001100" source="9981" target="9868" cy:directed="1"/>
      <edge id="13485" label="0010011010 (1) 0010011110" source="9980" target="9672" cy:directed="1"/>
      <edge id="13484" label="0010011010 (1) 0010010010" source="9980" target="10133" cy:directed="1"/>
      <edge id="13483" label="0010011010 (1) 0010001010" source="9980" target="10087" cy:directed="1"/>
      <edge id="13482" label="0010011010 (1) 0000011010" source="9980" target="9999" cy:directed="1"/>
      <edge id="13481" label="0010011100 (1) 0010011110" source="9979" target="9672" cy:directed="1"/>
      <edge id="13480" label="0010011100 (1) 0010001100" source="9979" target="9863" cy:directed="1"/>
      <edge id="13479" label="0000110100 (1) 0000110000" source="9978" target="10173" cy:directed="1"/>
      <edge id="13478" label="0000110100 (1) 0000111100" source="9978" target="9928" cy:directed="1"/>
      <edge id="13477" label="0000110100 (1) 0001110100" source="9978" target="9954" cy:directed="1"/>
      <edge id="13476" label="0000110100 (1) 0010110100" source="9978" target="9970" cy:directed="1"/>
      <edge id="13475" label="1110011010 (1) 1110011110" source="9977" target="9669" cy:directed="1"/>
      <edge id="13474" label="1110011010 (1) 1110010010" source="9977" target="10129" cy:directed="1"/>
      <edge id="13473" label="1110011010 (1) 1110001010" source="9977" target="10085" cy:directed="1"/>
      <edge id="13472" label="1110011010 (1) 1100011010" source="9977" target="9995" cy:directed="1"/>
      <edge id="13471" label="1110011010 (1) 1010011010" source="9977" target="9982" cy:directed="1"/>
      <edge id="13470" label="1110011100 (1) 1110011110" source="9976" target="9669" cy:directed="1"/>
      <edge id="13469" label="1110011100 (1) 1110001100" source="9976" target="9850" cy:directed="1"/>
      <edge id="13468" label="1110011100 (1) 1010011100" source="9976" target="9981" cy:directed="1"/>
      <edge id="13467" label="1100110100 (1) 1100110000" source="9975" target="10170" cy:directed="1"/>
      <edge id="13466" label="1100110100 (1) 1100111100" source="9975" target="9926" cy:directed="1"/>
      <edge id="13465" label="1100110100 (1) 1101110100" source="9975" target="9943" cy:directed="1"/>
      <edge id="13464" label="1100110100 (1) 1110110100" source="9975" target="9969" cy:directed="1"/>
      <edge id="13463" label="1100110100 (1) 1000110100" source="9975" target="9983" cy:directed="1"/>
      <edge id="13462" label="0110011010 (1) 0110011110" source="9974" target="9668" cy:directed="1"/>
      <edge id="13461" label="0110011010 (1) 0110010010" source="9974" target="10125" cy:directed="1"/>
      <edge id="13460" label="0110011010 (1) 0110001010" source="9974" target="10082" cy:directed="1"/>
      <edge id="13459" label="0110011010 (1) 0100011010" source="9974" target="9989" cy:directed="1"/>
      <edge id="13458" label="0110011010 (1) 0010011010" source="9974" target="9980" cy:directed="1"/>
      <edge id="13457" label="0110011100 (1) 0110011110" source="9973" target="9668" cy:directed="1"/>
      <edge id="13456" label="0110011100 (1) 0110001100" source="9973" target="9845" cy:directed="1"/>
      <edge id="13455" label="0110011100 (1) 0010011100" source="9973" target="9979" cy:directed="1"/>
      <edge id="13454" label="0100110100 (1) 0100110000" source="9972" target="10168" cy:directed="1"/>
      <edge id="13453" label="0100110100 (1) 0100111100" source="9972" target="9923" cy:directed="1"/>
      <edge id="13452" label="0100110100 (1) 0101110100" source="9972" target="9942" cy:directed="1"/>
      <edge id="13451" label="0100110100 (1) 0110110100" source="9972" target="9964" cy:directed="1"/>
      <edge id="13450" label="0100110100 (1) 0000110100" source="9972" target="9978" cy:directed="1"/>
      <edge id="13449" label="1010110100 (1) 1010110000" source="9971" target="10167" cy:directed="1"/>
      <edge id="13448" label="1010110100 (1) 1010111100" source="9971" target="9906" cy:directed="1"/>
      <edge id="13447" label="0010110100 (1) 0010110000" source="9970" target="10165" cy:directed="1"/>
      <edge id="13446" label="0010110100 (1) 0010111100" source="9970" target="9904" cy:directed="1"/>
      <edge id="13445" label="1110110100 (1) 1110110000" source="9969" target="10164" cy:directed="1"/>
      <edge id="13444" label="1110110100 (1) 1110111100" source="9969" target="9892" cy:directed="1"/>
      <edge id="13443" label="1110110100 (1) 1010110100" source="9969" target="9971" cy:directed="1"/>
      <edge id="13442" label="1001011010 (1) 1001011110" source="9968" target="9623" cy:directed="1"/>
      <edge id="13441" label="1001011010 (1) 1001010010" source="9968" target="10123" cy:directed="1"/>
      <edge id="13440" label="1001011010 (1) 1001001010" source="9968" target="10078" cy:directed="1"/>
      <edge id="13439" label="1001011100 (1) 1001011110" source="9967" target="9623" cy:directed="1"/>
      <edge id="13438" label="1001011100 (1) 1001001100" source="9967" target="9869" cy:directed="1"/>
      <edge id="13437" label="1001011100 (1) 1011011100" source="9967" target="9956" cy:directed="1"/>
      <edge id="13436" label="0001011010 (1) 0001011110" source="9966" target="9622" cy:directed="1"/>
      <edge id="13435" label="0001011010 (1) 0001010010" source="9966" target="10121" cy:directed="1"/>
      <edge id="13434" label="0001011010 (1) 0001001010" source="9966" target="10076" cy:directed="1"/>
      <edge id="13433" label="0001011100 (1) 0001011110" source="9965" target="9622" cy:directed="1"/>
      <edge id="13432" label="0001011100 (1) 0001001100" source="9965" target="9864" cy:directed="1"/>
      <edge id="13431" label="0001011100 (1) 0011011100" source="9965" target="9952" cy:directed="1"/>
      <edge id="13430" label="0110110100 (1) 0110110000" source="9964" target="10162" cy:directed="1"/>
      <edge id="13429" label="0110110100 (1) 0110111100" source="9964" target="9891" cy:directed="1"/>
      <edge id="13428" label="0110110100 (1) 0010110100" source="9964" target="9970" cy:directed="1"/>
      <edge id="13427" label="1101011010 (1) 1101011110" source="9963" target="9613" cy:directed="1"/>
      <edge id="13426" label="1101011010 (1) 1101010010" source="9963" target="10119" cy:directed="1"/>
      <edge id="13425" label="1101011010 (1) 1101001010" source="9963" target="10074" cy:directed="1"/>
      <edge id="13424" label="1101011010 (1) 1101111010" source="9963" target="9565" cy:directed="1"/>
      <edge id="13423" label="1101011010 (1) 1001011010" source="9963" target="9968" cy:directed="1"/>
      <edge id="13422" label="1101011100 (1) 1101011110" source="9962" target="9613" cy:directed="1"/>
      <edge id="13421" label="1101011100 (1) 1101001100" source="9962" target="9851" cy:directed="1"/>
      <edge id="13420" label="1101011100 (1) 1101111100" source="9962" target="9839" cy:directed="1"/>
      <edge id="13419" label="1101011100 (1) 1111011100" source="9962" target="9938" cy:directed="1"/>
      <edge id="13418" label="1101011100 (1) 1001011100" source="9962" target="9967" cy:directed="1"/>
      <edge id="13417" label="0101011010 (1) 0101011110" source="9961" target="9611" cy:directed="1"/>
      <edge id="13416" label="0101011010 (1) 0101010010" source="9961" target="10117" cy:directed="1"/>
      <edge id="13415" label="0101011010 (1) 0101001010" source="9961" target="10071" cy:directed="1"/>
      <edge id="13414" label="0101011010 (1) 0101111010" source="9961" target="9554" cy:directed="1"/>
      <edge id="13413" label="0101011010 (1) 0001011010" source="9961" target="9966" cy:directed="1"/>
      <edge id="13412" label="0101011100 (1) 0101011110" source="9960" target="9611" cy:directed="1"/>
      <edge id="13411" label="0101011100 (1) 0101001100" source="9960" target="9846" cy:directed="1"/>
      <edge id="13410" label="0101011100 (1) 0101111100" source="9960" target="9838" cy:directed="1"/>
      <edge id="13409" label="0101011100 (1) 0111011100" source="9960" target="9940" cy:directed="1"/>
      <edge id="13408" label="0101011100 (1) 0001011100" source="9960" target="9965" cy:directed="1"/>
      <edge id="13407" label="1101100010 (1) 1101100000" source="9959" target="10192" cy:directed="1"/>
      <edge id="13406" label="1101100010 (1) 1101110010" source="9959" target="9827" cy:directed="1"/>
      <edge id="13405" label="1001110100 (1) 1001110000" source="9958" target="10161" cy:directed="1"/>
      <edge id="13404" label="1001110100 (1) 1001111100" source="9958" target="9853" cy:directed="1"/>
      <edge id="13403" label="1001110100 (1) 1011110100" source="9958" target="9925" cy:directed="1"/>
      <edge id="13402" label="1011011010 (1) 1011011110" source="9957" target="9579" cy:directed="1"/>
      <edge id="13401" label="1011011010 (1) 1011010010" source="9957" target="10102" cy:directed="1"/>
      <edge id="13400" label="1011011010 (1) 1011001010" source="9957" target="10062" cy:directed="1"/>
      <edge id="13399" label="1011011010 (1) 1010011010" source="9957" target="9982" cy:directed="1"/>
      <edge id="13398" label="1011011010 (1) 1001011010" source="9957" target="9968" cy:directed="1"/>
      <edge id="13397" label="1011011100 (1) 1011011110" source="9956" target="9579" cy:directed="1"/>
      <edge id="13396" label="1011011100 (1) 1011001100" source="9956" target="9805" cy:directed="1"/>
      <edge id="13395" label="1011011100 (1) 1010011100" source="9956" target="9981" cy:directed="1"/>
      <edge id="13394" label="0101100010 (1) 0101100000" source="9955" target="10190" cy:directed="1"/>
      <edge id="13393" label="0101100010 (1) 0101110010" source="9955" target="9818" cy:directed="1"/>
      <edge id="13392" label="0101100010 (1) 0001100010" source="9955" target="9908" cy:directed="1"/>
      <edge id="13391" label="0001110100 (1) 0001110000" source="9954" target="10155" cy:directed="1"/>
      <edge id="13390" label="0001110100 (1) 0001111100" source="9954" target="9849" cy:directed="1"/>
      <edge id="13389" label="0001110100 (1) 0011110100" source="9954" target="9924" cy:directed="1"/>
      <edge id="13388" label="0011011010 (1) 0011011110" source="9953" target="9577" cy:directed="1"/>
      <edge id="13387" label="0011011010 (1) 0011010010" source="9953" target="10099" cy:directed="1"/>
      <edge id="13386" label="0011011010 (1) 0011001010" source="9953" target="10054" cy:directed="1"/>
      <edge id="13385" label="0011011010 (1) 0010011010" source="9953" target="9980" cy:directed="1"/>
      <edge id="13384" label="0011011010 (1) 0001011010" source="9953" target="9966" cy:directed="1"/>
      <edge id="13383" label="0011011100 (1) 0011011110" source="9952" target="9577" cy:directed="1"/>
      <edge id="13382" label="0011011100 (1) 0011001100" source="9952" target="9800" cy:directed="1"/>
      <edge id="13381" label="0011011100 (1) 0010011100" source="9952" target="9979" cy:directed="1"/>
      <edge id="13380" label="0000010100 (1) 0000010110" source="9951" target="9950" cy:directed="1"/>
      <edge id="13379" label="0000010100 (1) 0000010000" source="9951" target="10153" cy:directed="1"/>
      <edge id="13378" label="0000010100 (1) 0000011100" source="9951" target="9998" cy:directed="1"/>
      <edge id="13377" label="0000010100 (1) 0000000100" source="9951" target="10060" cy:directed="1"/>
      <edge id="13376" label="0000010100 (1) 0000110100" source="9951" target="9978" cy:directed="1"/>
      <edge id="13375" label="0000010100 (1) 0001010100" source="9951" target="9949" cy:directed="1"/>
      <edge id="13374" label="0000010100 (1) 0010010100" source="9951" target="9948" cy:directed="1"/>
      <edge id="13373" label="0000010110 (1) 0000010010" source="9950" target="10152" cy:directed="1"/>
      <edge id="13372" label="0000010110 (1) 0000000110" source="9950" target="10059" cy:directed="1"/>
      <edge id="13371" label="0000010110 (1) 0000110110" source="9950" target="9540" cy:directed="1"/>
      <edge id="13370" label="0000010110 (1) 0001010110" source="9950" target="9883" cy:directed="1"/>
      <edge id="13369" label="0000010110 (1) 0010010110" source="9950" target="9921" cy:directed="1"/>
      <edge id="13368" label="0001010100 (1) 0001010110" source="9949" target="9883" cy:directed="1"/>
      <edge id="13367" label="0001010100 (1) 0001010000" source="9949" target="10150" cy:directed="1"/>
      <edge id="13366" label="0001010100 (1) 0001011100" source="9949" target="9965" cy:directed="1"/>
      <edge id="13365" label="0001010100 (1) 0001000100" source="9949" target="10057" cy:directed="1"/>
      <edge id="13364" label="0001010100 (1) 0001110100" source="9949" target="9954" cy:directed="1"/>
      <edge id="13363" label="0001010100 (1) 0011010100" source="9949" target="9882" cy:directed="1"/>
      <edge id="13362" label="0010010100 (1) 0010010110" source="9948" target="9921" cy:directed="1"/>
      <edge id="13361" label="0010010100 (1) 0010010000" source="9948" target="10134" cy:directed="1"/>
      <edge id="13360" label="0010010100 (1) 0010011100" source="9948" target="9979" cy:directed="1"/>
      <edge id="13359" label="0010010100 (1) 0010000100" source="9948" target="10056" cy:directed="1"/>
      <edge id="13358" label="0010010100 (1) 0010110100" source="9948" target="9970" cy:directed="1"/>
      <edge id="13357" label="1000010100 (1) 1000010110" source="9947" target="9946" cy:directed="1"/>
      <edge id="13356" label="1000010100 (1) 1000010000" source="9947" target="10159" cy:directed="1"/>
      <edge id="13355" label="1000010100 (1) 1000011100" source="9947" target="10000" cy:directed="1"/>
      <edge id="13354" label="1000010100 (1) 1000000100" source="9947" target="10069" cy:directed="1"/>
      <edge id="13353" label="1000010100 (1) 1000110100" source="9947" target="9983" cy:directed="1"/>
      <edge id="13352" label="1000010100 (1) 1001010100" source="9947" target="9945" cy:directed="1"/>
      <edge id="13351" label="1000010100 (1) 1010010100" source="9947" target="9944" cy:directed="1"/>
      <edge id="13350" label="1000010110 (1) 1000010010" source="9946" target="10158" cy:directed="1"/>
      <edge id="13349" label="1000010110 (1) 1000000110" source="9946" target="10068" cy:directed="1"/>
      <edge id="13348" label="1000010110 (1) 1000110110" source="9946" target="9541" cy:directed="1"/>
      <edge id="13347" label="1000010110 (1) 1001010110" source="9946" target="9881" cy:directed="1"/>
      <edge id="13346" label="1000010110 (1) 1010010110" source="9946" target="9920" cy:directed="1"/>
      <edge id="13345" label="1001010100 (1) 1001010110" source="9945" target="9881" cy:directed="1"/>
      <edge id="13344" label="1001010100 (1) 1001010000" source="9945" target="10156" cy:directed="1"/>
      <edge id="13343" label="1001010100 (1) 1001011100" source="9945" target="9967" cy:directed="1"/>
      <edge id="13342" label="1001010100 (1) 1001000100" source="9945" target="10066" cy:directed="1"/>
      <edge id="13341" label="1001010100 (1) 1001110100" source="9945" target="9958" cy:directed="1"/>
      <edge id="13340" label="1001010100 (1) 1011010100" source="9945" target="9880" cy:directed="1"/>
      <edge id="13339" label="1010010100 (1) 1010010110" source="9944" target="9920" cy:directed="1"/>
      <edge id="13338" label="1010010100 (1) 1010010000" source="9944" target="10138" cy:directed="1"/>
      <edge id="13337" label="1010010100 (1) 1010011100" source="9944" target="9981" cy:directed="1"/>
      <edge id="13336" label="1010010100 (1) 1010000100" source="9944" target="10065" cy:directed="1"/>
      <edge id="13335" label="1010010100 (1) 1010110100" source="9944" target="9971" cy:directed="1"/>
      <edge id="13334" label="1101110100 (1) 1101110000" source="9943" target="10149" cy:directed="1"/>
      <edge id="13333" label="1101110100 (1) 1101111100" source="9943" target="9839" cy:directed="1"/>
      <edge id="13332" label="1101110100 (1) 1111110100" source="9943" target="9919" cy:directed="1"/>
      <edge id="13331" label="1101110100 (1) 1001110100" source="9943" target="9958" cy:directed="1"/>
      <edge id="13330" label="0101110100 (1) 0101110000" source="9942" target="10144" cy:directed="1"/>
      <edge id="13329" label="0101110100 (1) 0101111100" source="9942" target="9838" cy:directed="1"/>
      <edge id="13328" label="0101110100 (1) 0111110100" source="9942" target="9918" cy:directed="1"/>
      <edge id="13327" label="0101110100 (1) 0001110100" source="9942" target="9954" cy:directed="1"/>
      <edge id="13326" label="0111011010 (1) 0111011110" source="9941" target="9570" cy:directed="1"/>
      <edge id="13325" label="0111011010 (1) 0111010010" source="9941" target="10096" cy:directed="1"/>
      <edge id="13324" label="0111011010 (1) 0111001010" source="9941" target="10039" cy:directed="1"/>
      <edge id="13323" label="0111011010 (1) 0111111010" source="9941" target="9525" cy:directed="1"/>
      <edge id="13322" label="0111011010 (1) 0110011010" source="9941" target="9974" cy:directed="1"/>
      <edge id="13321" label="0111011010 (1) 0101011010" source="9941" target="9961" cy:directed="1"/>
      <edge id="13320" label="0111011010 (1) 0011011010" source="9941" target="9953" cy:directed="1"/>
      <edge id="13319" label="0111011100 (1) 0111011110" source="9940" target="9570" cy:directed="1"/>
      <edge id="13318" label="0111011100 (1) 0111001100" source="9940" target="9789" cy:directed="1"/>
      <edge id="13317" label="0111011100 (1) 0111111100" source="9940" target="9816" cy:directed="1"/>
      <edge id="13316" label="0111011100 (1) 0110011100" source="9940" target="9973" cy:directed="1"/>
      <edge id="13315" label="0111011100 (1) 0011011100" source="9940" target="9952" cy:directed="1"/>
      <edge id="13314" label="1111011010 (1) 1111011110" source="9939" target="9571" cy:directed="1"/>
      <edge id="13313" label="1111011010 (1) 1111010010" source="9939" target="10093" cy:directed="1"/>
      <edge id="13312" label="1111011010 (1) 1111001010" source="9939" target="10048" cy:directed="1"/>
      <edge id="13311" label="1111011010 (1) 1111111010" source="9939" target="9536" cy:directed="1"/>
      <edge id="13310" label="1111011010 (1) 1110011010" source="9939" target="9977" cy:directed="1"/>
      <edge id="13309" label="1111011010 (1) 1101011010" source="9939" target="9963" cy:directed="1"/>
      <edge id="13308" label="1111011010 (1) 1011011010" source="9939" target="9957" cy:directed="1"/>
      <edge id="13307" label="1111011100 (1) 1111011110" source="9938" target="9571" cy:directed="1"/>
      <edge id="13306" label="1111011100 (1) 1111001100" source="9938" target="9792" cy:directed="1"/>
      <edge id="13305" label="1111011100 (1) 1111111100" source="9938" target="9817" cy:directed="1"/>
      <edge id="13304" label="1111011100 (1) 1110011100" source="9938" target="9976" cy:directed="1"/>
      <edge id="13303" label="1111011100 (1) 1011011100" source="9938" target="9956" cy:directed="1"/>
      <edge id="13302" label="0100010100 (1) 0100010110" source="9937" target="9936" cy:directed="1"/>
      <edge id="13301" label="0100010100 (1) 0100010000" source="9937" target="10143" cy:directed="1"/>
      <edge id="13300" label="0100010100 (1) 0100011100" source="9937" target="9988" cy:directed="1"/>
      <edge id="13299" label="0100010100 (1) 0100000100" source="9937" target="10045" cy:directed="1"/>
      <edge id="13298" label="0100010100 (1) 0100110100" source="9937" target="9972" cy:directed="1"/>
      <edge id="13297" label="0100010100 (1) 0101010100" source="9937" target="9935" cy:directed="1"/>
      <edge id="13296" label="0100010100 (1) 0110010100" source="9937" target="9934" cy:directed="1"/>
      <edge id="13295" label="0100010100 (1) 0000010100" source="9937" target="9951" cy:directed="1"/>
      <edge id="13294" label="0100010110 (1) 0100010010" source="9936" target="10142" cy:directed="1"/>
      <edge id="13293" label="0100010110 (1) 0100000110" source="9936" target="10044" cy:directed="1"/>
      <edge id="13292" label="0100010110 (1) 0100110110" source="9936" target="9531" cy:directed="1"/>
      <edge id="13291" label="0100010110 (1) 0101010110" source="9936" target="9876" cy:directed="1"/>
      <edge id="13290" label="0100010110 (1) 0110010110" source="9936" target="9917" cy:directed="1"/>
      <edge id="13289" label="0100010110 (1) 0000010110" source="9936" target="9950" cy:directed="1"/>
      <edge id="13288" label="0101010100 (1) 0101010110" source="9935" target="9876" cy:directed="1"/>
      <edge id="13287" label="0101010100 (1) 0101010000" source="9935" target="10140" cy:directed="1"/>
      <edge id="13286" label="0101010100 (1) 0101011100" source="9935" target="9960" cy:directed="1"/>
      <edge id="13285" label="0101010100 (1) 0101000100" source="9935" target="10042" cy:directed="1"/>
      <edge id="13284" label="0101010100 (1) 0101110100" source="9935" target="9942" cy:directed="1"/>
      <edge id="13283" label="0101010100 (1) 0111010100" source="9935" target="9875" cy:directed="1"/>
      <edge id="13282" label="0101010100 (1) 0001010100" source="9935" target="9949" cy:directed="1"/>
      <edge id="13281" label="0110010100 (1) 0110010110" source="9934" target="9917" cy:directed="1"/>
      <edge id="13280" label="0110010100 (1) 0110010000" source="9934" target="10126" cy:directed="1"/>
      <edge id="13279" label="0110010100 (1) 0110011100" source="9934" target="9973" cy:directed="1"/>
      <edge id="13278" label="0110010100 (1) 0110000100" source="9934" target="10041" cy:directed="1"/>
      <edge id="13277" label="0110010100 (1) 0110110100" source="9934" target="9964" cy:directed="1"/>
      <edge id="13276" label="0110010100 (1) 0010010100" source="9934" target="9948" cy:directed="1"/>
      <edge id="13275" label="1100010100 (1) 1100010110" source="9933" target="9932" cy:directed="1"/>
      <edge id="13274" label="1100010100 (1) 1100010000" source="9933" target="10148" cy:directed="1"/>
      <edge id="13273" label="1100010100 (1) 1100011100" source="9933" target="9994" cy:directed="1"/>
      <edge id="13272" label="1100010100 (1) 1100000100" source="9933" target="10064" cy:directed="1"/>
      <edge id="13271" label="1100010100 (1) 1100110100" source="9933" target="9975" cy:directed="1"/>
      <edge id="13270" label="1100010100 (1) 1101010100" source="9933" target="9931" cy:directed="1"/>
      <edge id="13269" label="1100010100 (1) 1110010100" source="9933" target="9930" cy:directed="1"/>
      <edge id="13268" label="1100010100 (1) 1000010100" source="9933" target="9947" cy:directed="1"/>
      <edge id="13267" label="1100010110 (1) 1100010010" source="9932" target="10147" cy:directed="1"/>
      <edge id="13266" label="1100010110 (1) 1100000110" source="9932" target="10052" cy:directed="1"/>
      <edge id="13265" label="1100010110 (1) 1100110110" source="9932" target="9537" cy:directed="1"/>
      <edge id="13264" label="1100010110 (1) 1101010110" source="9932" target="9874" cy:directed="1"/>
      <edge id="13263" label="1100010110 (1) 1110010110" source="9932" target="9916" cy:directed="1"/>
      <edge id="13262" label="1100010110 (1) 1000010110" source="9932" target="9946" cy:directed="1"/>
      <edge id="13261" label="1101010100 (1) 1101010110" source="9931" target="9874" cy:directed="1"/>
      <edge id="13260" label="1101010100 (1) 1101010000" source="9931" target="10145" cy:directed="1"/>
      <edge id="13259" label="1101010100 (1) 1101011100" source="9931" target="9962" cy:directed="1"/>
      <edge id="13258" label="1101010100 (1) 1101000100" source="9931" target="10050" cy:directed="1"/>
      <edge id="13257" label="1101010100 (1) 1101110100" source="9931" target="9943" cy:directed="1"/>
      <edge id="13256" label="1101010100 (1) 1111010100" source="9931" target="9873" cy:directed="1"/>
      <edge id="13255" label="1101010100 (1) 1001010100" source="9931" target="9945" cy:directed="1"/>
      <edge id="13254" label="1110010100 (1) 1110010110" source="9930" target="9916" cy:directed="1"/>
      <edge id="13253" label="1110010100 (1) 1110010000" source="9930" target="10130" cy:directed="1"/>
      <edge id="13252" label="1110010100 (1) 1110011100" source="9930" target="9976" cy:directed="1"/>
      <edge id="13251" label="1110010100 (1) 1110000100" source="9930" target="10049" cy:directed="1"/>
      <edge id="13250" label="1110010100 (1) 1110110100" source="9930" target="9969" cy:directed="1"/>
      <edge id="13249" label="1110010100 (1) 1010010100" source="9930" target="9944" cy:directed="1"/>
      <edge id="13248" label="1000111100 (1) 1000011100" source="9929" target="10000" cy:directed="1"/>
      <edge id="13247" label="1000111100 (1) 1001111100" source="9929" target="9853" cy:directed="1"/>
      <edge id="13246" label="1000111100 (1) 1010111100" source="9929" target="9906" cy:directed="1"/>
      <edge id="13245" label="0000111100 (1) 0000011100" source="9928" target="9998" cy:directed="1"/>
      <edge id="13244" label="0000111100 (1) 0001111100" source="9928" target="9849" cy:directed="1"/>
      <edge id="13243" label="0000111100 (1) 0010111100" source="9928" target="9904" cy:directed="1"/>
      <edge id="13242" label="1111100010 (1) 1111100000" source="9927" target="10183" cy:directed="1"/>
      <edge id="13241" label="1111100010 (1) 1111110010" source="9927" target="9807" cy:directed="1"/>
      <edge id="13240" label="1111100010 (1) 1110100010" source="9927" target="9878" cy:directed="1"/>
      <edge id="13239" label="1111100010 (1) 1101100010" source="9927" target="9959" cy:directed="1"/>
      <edge id="13238" label="1100111100 (1) 1100011100" source="9926" target="9994" cy:directed="1"/>
      <edge id="13237" label="1100111100 (1) 1101111100" source="9926" target="9839" cy:directed="1"/>
      <edge id="13236" label="1100111100 (1) 1110111100" source="9926" target="9892" cy:directed="1"/>
      <edge id="13235" label="1100111100 (1) 1000111100" source="9926" target="9929" cy:directed="1"/>
      <edge id="13234" label="1011110100 (1) 1011110000" source="9925" target="10139" cy:directed="1"/>
      <edge id="13233" label="1011110100 (1) 1011111100" source="9925" target="9823" cy:directed="1"/>
      <edge id="13232" label="1011110100 (1) 1010110100" source="9925" target="9971" cy:directed="1"/>
      <edge id="13231" label="0011110100 (1) 0011110000" source="9924" target="10135" cy:directed="1"/>
      <edge id="13230" label="0011110100 (1) 0011111100" source="9924" target="9821" cy:directed="1"/>
      <edge id="13229" label="0011110100 (1) 0010110100" source="9924" target="9970" cy:directed="1"/>
      <edge id="13228" label="0100111100 (1) 0100011100" source="9923" target="9988" cy:directed="1"/>
      <edge id="13227" label="0100111100 (1) 0101111100" source="9923" target="9838" cy:directed="1"/>
      <edge id="13226" label="0100111100 (1) 0110111100" source="9923" target="9891" cy:directed="1"/>
      <edge id="13225" label="0100111100 (1) 0000111100" source="9923" target="9928" cy:directed="1"/>
      <edge id="13224" label="0111100010 (1) 0111100000" source="9922" target="10180" cy:directed="1"/>
      <edge id="13223" label="0111100010 (1) 0111110010" source="9922" target="9799" cy:directed="1"/>
      <edge id="13222" label="0111100010 (1) 0110100010" source="9922" target="9862" cy:directed="1"/>
      <edge id="13221" label="0111100010 (1) 0101100010" source="9922" target="9955" cy:directed="1"/>
      <edge id="13220" label="0111100010 (1) 0011100010" source="9922" target="9828" cy:directed="1"/>
      <edge id="13219" label="0010010110 (1) 0010010010" source="9921" target="10133" cy:directed="1"/>
      <edge id="13218" label="0010010110 (1) 0010000110" source="9921" target="10026" cy:directed="1"/>
      <edge id="13217" label="0010010110 (1) 0010110110" source="9921" target="9506" cy:directed="1"/>
      <edge id="13216" label="1010010110 (1) 1010010010" source="9920" target="10137" cy:directed="1"/>
      <edge id="13215" label="1010010110 (1) 1010000110" source="9920" target="10028" cy:directed="1"/>
      <edge id="13214" label="1010010110 (1) 1010110110" source="9920" target="9507" cy:directed="1"/>
      <edge id="13213" label="1111110100 (1) 1111110000" source="9919" target="10131" cy:directed="1"/>
      <edge id="13212" label="1111110100 (1) 1111111100" source="9919" target="9817" cy:directed="1"/>
      <edge id="13211" label="1111110100 (1) 1110110100" source="9919" target="9969" cy:directed="1"/>
      <edge id="13210" label="1111110100 (1) 1011110100" source="9919" target="9925" cy:directed="1"/>
      <edge id="13209" label="0111110100 (1) 0111110000" source="9918" target="10127" cy:directed="1"/>
      <edge id="13208" label="0111110100 (1) 0111111100" source="9918" target="9816" cy:directed="1"/>
      <edge id="13207" label="0111110100 (1) 0110110100" source="9918" target="9964" cy:directed="1"/>
      <edge id="13206" label="0111110100 (1) 0011110100" source="9918" target="9924" cy:directed="1"/>
      <edge id="13205" label="0110010110 (1) 0110010010" source="9917" target="10125" cy:directed="1"/>
      <edge id="13204" label="0110010110 (1) 0110000110" source="9917" target="10019" cy:directed="1"/>
      <edge id="13203" label="0110010110 (1) 0110110110" source="9917" target="9495" cy:directed="1"/>
      <edge id="13202" label="0110010110 (1) 0010010110" source="9917" target="9921" cy:directed="1"/>
      <edge id="13201" label="1110010110 (1) 1110010010" source="9916" target="10129" cy:directed="1"/>
      <edge id="13200" label="1110010110 (1) 1110000110" source="9916" target="10022" cy:directed="1"/>
      <edge id="13199" label="1110010110 (1) 1110110110" source="9916" target="9496" cy:directed="1"/>
      <edge id="13198" label="1110010110 (1) 1010010110" source="9916" target="9920" cy:directed="1"/>
      <edge id="13197" label="1000100010 (1) 1000100000" source="9915" target="10179" cy:directed="1"/>
      <edge id="13196" label="1000100010 (1) 1000110010" source="9915" target="9914" cy:directed="1"/>
      <edge id="13195" label="1000100010 (1) 1000000010" source="9915" target="10211" cy:directed="1"/>
      <edge id="13194" label="1000100010 (1) 1001100010" source="9915" target="9913" cy:directed="1"/>
      <edge id="13193" label="1000100010 (1) 1010100010" source="9915" target="9912" cy:directed="1"/>
      <edge id="13192" label="1000100010 (1) 1100100010" source="9915" target="9911" cy:directed="1"/>
      <edge id="13191" label="1000110010 (1) 1000110000" source="9914" target="10178" cy:directed="1"/>
      <edge id="13190" label="1000110010 (1) 1000010010" source="9914" target="10158" cy:directed="1"/>
      <edge id="13189" label="1000110010 (1) 1001110010" source="9914" target="9832" cy:directed="1"/>
      <edge id="13188" label="1000110010 (1) 1010110010" source="9914" target="9879" cy:directed="1"/>
      <edge id="13187" label="1001100010 (1) 1001100000" source="9913" target="10177" cy:directed="1"/>
      <edge id="13186" label="1001100010 (1) 1001110010" source="9913" target="9832" cy:directed="1"/>
      <edge id="13185" label="1001100010 (1) 1001000010" source="9913" target="10194" cy:directed="1"/>
      <edge id="13184" label="1001100010 (1) 1011100010" source="9913" target="9831" cy:directed="1"/>
      <edge id="13183" label="1001100010 (1) 1101100010" source="9913" target="9959" cy:directed="1"/>
      <edge id="13182" label="1010100010 (1) 1010100000" source="9912" target="10176" cy:directed="1"/>
      <edge id="13181" label="1010100010 (1) 1010110010" source="9912" target="9879" cy:directed="1"/>
      <edge id="13180" label="1010100010 (1) 1010000010" source="9912" target="10202" cy:directed="1"/>
      <edge id="13179" label="1010100010 (1) 1110100010" source="9912" target="9878" cy:directed="1"/>
      <edge id="13178" label="1100100010 (1) 1100100000" source="9911" target="10175" cy:directed="1"/>
      <edge id="13177" label="1100100010 (1) 1100110010" source="9911" target="9905" cy:directed="1"/>
      <edge id="13176" label="1100100010 (1) 1100000010" source="9911" target="10208" cy:directed="1"/>
      <edge id="13175" label="1100100010 (1) 1101100010" source="9911" target="9959" cy:directed="1"/>
      <edge id="13174" label="0000100010 (1) 0000100000" source="9910" target="10174" cy:directed="1"/>
      <edge id="13173" label="0000100010 (1) 0000110010" source="9910" target="9909" cy:directed="1"/>
      <edge id="13172" label="0000100010 (1) 0000000010" source="9910" target="10214" cy:directed="1"/>
      <edge id="13171" label="0000100010 (1) 0001100010" source="9910" target="9908" cy:directed="1"/>
      <edge id="13170" label="0000100010 (1) 0010100010" source="9910" target="9907" cy:directed="1"/>
      <edge id="13169" label="0000110010 (1) 0000110000" source="9909" target="10173" cy:directed="1"/>
      <edge id="13168" label="0000110010 (1) 0000010010" source="9909" target="10152" cy:directed="1"/>
      <edge id="13167" label="0000110010 (1) 0001110010" source="9909" target="9829" cy:directed="1"/>
      <edge id="13166" label="0000110010 (1) 0010110010" source="9909" target="9877" cy:directed="1"/>
      <edge id="13165" label="0001100010 (1) 0001100000" source="9908" target="10172" cy:directed="1"/>
      <edge id="13164" label="0001100010 (1) 0001110010" source="9908" target="9829" cy:directed="1"/>
      <edge id="13163" label="0001100010 (1) 0001000010" source="9908" target="10195" cy:directed="1"/>
      <edge id="13162" label="0001100010 (1) 0011100010" source="9908" target="9828" cy:directed="1"/>
      <edge id="13161" label="0010100010 (1) 0010100000" source="9907" target="10171" cy:directed="1"/>
      <edge id="13160" label="0010100010 (1) 0010110010" source="9907" target="9877" cy:directed="1"/>
      <edge id="13159" label="0010100010 (1) 0010000010" source="9907" target="10199" cy:directed="1"/>
      <edge id="13158" label="1010111100 (1) 1010011100" source="9906" target="9981" cy:directed="1"/>
      <edge id="13157" label="1100110010 (1) 1100110000" source="9905" target="10170" cy:directed="1"/>
      <edge id="13156" label="1100110010 (1) 1100010010" source="9905" target="10147" cy:directed="1"/>
      <edge id="13155" label="1100110010 (1) 1101110010" source="9905" target="9827" cy:directed="1"/>
      <edge id="13154" label="1100110010 (1) 1000110010" source="9905" target="9914" cy:directed="1"/>
      <edge id="13153" label="0010111100 (1) 0010011100" source="9904" target="9979" cy:directed="1"/>
      <edge id="13152" label="0100100010 (1) 0100100000" source="9903" target="10169" cy:directed="1"/>
      <edge id="13151" label="0100100010 (1) 0100110010" source="9903" target="9902" cy:directed="1"/>
      <edge id="13150" label="0100100010 (1) 0100000010" source="9903" target="10205" cy:directed="1"/>
      <edge id="13149" label="0100100010 (1) 0101100010" source="9903" target="9955" cy:directed="1"/>
      <edge id="13148" label="0100100010 (1) 0000100010" source="9903" target="9910" cy:directed="1"/>
      <edge id="13147" label="0100110010 (1) 0100110000" source="9902" target="10168" cy:directed="1"/>
      <edge id="13146" label="0100110010 (1) 0100010010" source="9902" target="10142" cy:directed="1"/>
      <edge id="13145" label="0100110010 (1) 0101110010" source="9902" target="9818" cy:directed="1"/>
      <edge id="13144" label="0100110010 (1) 0000110010" source="9902" target="9909" cy:directed="1"/>
      <edge id="13143" label="0000000001 (1) 0000000011" source="9901" target="9900" cy:directed="1"/>
      <edge id="13142" label="0000000001 (1) 0000000101" source="9901" target="9899" cy:directed="1"/>
      <edge id="13141" label="0000000001 (1) 0001000001" source="9901" target="9898" cy:directed="1"/>
      <edge id="13140" label="0000000011 (1) 0000000111" source="9900" target="9530" cy:directed="1"/>
      <edge id="13139" label="0000000011 (1) 0001000011" source="9900" target="9825" cy:directed="1"/>
      <edge id="13138" label="0000000101 (1) 0000000111" source="9899" target="9530" cy:directed="1"/>
      <edge id="13137" label="0000000101 (1) 0000100101" source="9899" target="9780" cy:directed="1"/>
      <edge id="13136" label="0000000101 (1) 0001000101" source="9899" target="9824" cy:directed="1"/>
      <edge id="13135" label="0000000101 (1) 0010000101" source="9899" target="9854" cy:directed="1"/>
      <edge id="13134" label="0001000001 (1) 0001000011" source="9898" target="9825" cy:directed="1"/>
      <edge id="13133" label="0001000001 (1) 0001000101" source="9898" target="9824" cy:directed="1"/>
      <edge id="13132" label="1000000001 (1) 1000000011" source="9897" target="9896" cy:directed="1"/>
      <edge id="13131" label="1000000001 (1) 1000000101" source="9897" target="9895" cy:directed="1"/>
      <edge id="13130" label="1000000001 (1) 1001000001" source="9897" target="9894" cy:directed="1"/>
      <edge id="13129" label="1000000001 (1) 1100000001" source="9897" target="9893" cy:directed="1"/>
      <edge id="13128" label="1000000011 (1) 1000000111" source="9896" target="9535" cy:directed="1"/>
      <edge id="13127" label="1000000011 (1) 1001000011" source="9896" target="9820" cy:directed="1"/>
      <edge id="13126" label="1000000011 (1) 1100000011" source="9896" target="9890" cy:directed="1"/>
      <edge id="13125" label="1000000101 (1) 1000000111" source="9895" target="9535" cy:directed="1"/>
      <edge id="13124" label="1000000101 (1) 1000100101" source="9895" target="9775" cy:directed="1"/>
      <edge id="13123" label="1000000101 (1) 1001000101" source="9895" target="9819" cy:directed="1"/>
      <edge id="13122" label="1000000101 (1) 1010000101" source="9895" target="9858" cy:directed="1"/>
      <edge id="13121" label="1000000101 (1) 1100000101" source="9895" target="9889" cy:directed="1"/>
      <edge id="13120" label="1001000001 (1) 1001000011" source="9894" target="9820" cy:directed="1"/>
      <edge id="13119" label="1001000001 (1) 1001000101" source="9894" target="9819" cy:directed="1"/>
      <edge id="13118" label="1001000001 (1) 1101000001" source="9894" target="9888" cy:directed="1"/>
      <edge id="13117" label="1100000001 (1) 1100000011" source="9893" target="9890" cy:directed="1"/>
      <edge id="13116" label="1100000001 (1) 1100000101" source="9893" target="9889" cy:directed="1"/>
      <edge id="13115" label="1100000001 (1) 1101000001" source="9893" target="9888" cy:directed="1"/>
      <edge id="13114" label="1110111100 (1) 1110011100" source="9892" target="9976" cy:directed="1"/>
      <edge id="13113" label="1110111100 (1) 1010111100" source="9892" target="9906" cy:directed="1"/>
      <edge id="13112" label="0110111100 (1) 0110011100" source="9891" target="9973" cy:directed="1"/>
      <edge id="13111" label="0110111100 (1) 0010111100" source="9891" target="9904" cy:directed="1"/>
      <edge id="13110" label="1100000011 (1) 1100000111" source="9890" target="9524" cy:directed="1"/>
      <edge id="13109" label="1100000011 (1) 1101000011" source="9890" target="9815" cy:directed="1"/>
      <edge id="13108" label="1100000101 (1) 1100000111" source="9889" target="9524" cy:directed="1"/>
      <edge id="13107" label="1100000101 (1) 1100100101" source="9889" target="9768" cy:directed="1"/>
      <edge id="13106" label="1100000101 (1) 1101000101" source="9889" target="9814" cy:directed="1"/>
      <edge id="13105" label="1100000101 (1) 1110000101" source="9889" target="9843" cy:directed="1"/>
      <edge id="13104" label="1101000001 (1) 1101000011" source="9888" target="9815" cy:directed="1"/>
      <edge id="13103" label="1101000001 (1) 1101000101" source="9888" target="9814" cy:directed="1"/>
      <edge id="13102" label="1101000001 (1) 1101100001" source="9888" target="9813" cy:directed="1"/>
      <edge id="13101" label="0100000001 (1) 0100000011" source="9887" target="9886" cy:directed="1"/>
      <edge id="13100" label="0100000001 (1) 0100000101" source="9887" target="9885" cy:directed="1"/>
      <edge id="13099" label="0100000001 (1) 0101000001" source="9887" target="9884" cy:directed="1"/>
      <edge id="13098" label="0100000001 (1) 0000000001" source="9887" target="9901" cy:directed="1"/>
      <edge id="13097" label="0100000011 (1) 0100000111" source="9886" target="9518" cy:directed="1"/>
      <edge id="13096" label="0100000011 (1) 0101000011" source="9886" target="9812" cy:directed="1"/>
      <edge id="13095" label="0100000011 (1) 0000000011" source="9886" target="9900" cy:directed="1"/>
      <edge id="13094" label="0100000101 (1) 0100000111" source="9885" target="9518" cy:directed="1"/>
      <edge id="13093" label="0100000101 (1) 0100100101" source="9885" target="9765" cy:directed="1"/>
      <edge id="13092" label="0100000101 (1) 0101000101" source="9885" target="9811" cy:directed="1"/>
      <edge id="13091" label="0100000101 (1) 0110000101" source="9885" target="9840" cy:directed="1"/>
      <edge id="13090" label="0100000101 (1) 0000000101" source="9885" target="9899" cy:directed="1"/>
      <edge id="13089" label="0101000001 (1) 0101000011" source="9884" target="9812" cy:directed="1"/>
      <edge id="13088" label="0101000001 (1) 0101000101" source="9884" target="9811" cy:directed="1"/>
      <edge id="13087" label="0101000001 (1) 0101100001" source="9884" target="9810" cy:directed="1"/>
      <edge id="13086" label="0101000001 (1) 0001000001" source="9884" target="9898" cy:directed="1"/>
      <edge id="13085" label="0001010110 (1) 0001010010" source="9883" target="10121" cy:directed="1"/>
      <edge id="13084" label="0001010110 (1) 0001000110" source="9883" target="10010" cy:directed="1"/>
      <edge id="13083" label="0001010110 (1) 0001110110" source="9883" target="9475" cy:directed="1"/>
      <edge id="13082" label="0001010110 (1) 0011010110" source="9883" target="9837" cy:directed="1"/>
      <edge id="13081" label="0011010100 (1) 0011010110" source="9882" target="9837" cy:directed="1"/>
      <edge id="13080" label="0011010100 (1) 0011010000" source="9882" target="10100" cy:directed="1"/>
      <edge id="13079" label="0011010100 (1) 0011011100" source="9882" target="9952" cy:directed="1"/>
      <edge id="13078" label="0011010100 (1) 0011000100" source="9882" target="10008" cy:directed="1"/>
      <edge id="13077" label="0011010100 (1) 0011110100" source="9882" target="9924" cy:directed="1"/>
      <edge id="13076" label="0011010100 (1) 0010010100" source="9882" target="9948" cy:directed="1"/>
      <edge id="13075" label="1001010110 (1) 1001010010" source="9881" target="10123" cy:directed="1"/>
      <edge id="13074" label="1001010110 (1) 1001000110" source="9881" target="10013" cy:directed="1"/>
      <edge id="13073" label="1001010110 (1) 1001110110" source="9881" target="9476" cy:directed="1"/>
      <edge id="13072" label="1001010110 (1) 1011010110" source="9881" target="9836" cy:directed="1"/>
      <edge id="13071" label="1011010100 (1) 1011010110" source="9880" target="9836" cy:directed="1"/>
      <edge id="13070" label="1011010100 (1) 1011010000" source="9880" target="10103" cy:directed="1"/>
      <edge id="13069" label="1011010100 (1) 1011011100" source="9880" target="9956" cy:directed="1"/>
      <edge id="13068" label="1011010100 (1) 1011000100" source="9880" target="10011" cy:directed="1"/>
      <edge id="13067" label="1011010100 (1) 1011110100" source="9880" target="9925" cy:directed="1"/>
      <edge id="13066" label="1011010100 (1) 1010010100" source="9880" target="9944" cy:directed="1"/>
      <edge id="13065" label="1010110010 (1) 1010110000" source="9879" target="10167" cy:directed="1"/>
      <edge id="13064" label="1010110010 (1) 1010010010" source="9879" target="10137" cy:directed="1"/>
      <edge id="13063" label="1110100010 (1) 1110100000" source="9878" target="10166" cy:directed="1"/>
      <edge id="13062" label="1110100010 (1) 1110110010" source="9878" target="9872" cy:directed="1"/>
      <edge id="13061" label="1110100010 (1) 1110000010" source="9878" target="10198" cy:directed="1"/>
      <edge id="13060" label="1110100010 (1) 1100100010" source="9878" target="9911" cy:directed="1"/>
      <edge id="13059" label="0010110010 (1) 0010110000" source="9877" target="10165" cy:directed="1"/>
      <edge id="13058" label="0010110010 (1) 0010010010" source="9877" target="10133" cy:directed="1"/>
      <edge id="13057" label="0101010110 (1) 0101010010" source="9876" target="10117" cy:directed="1"/>
      <edge id="13056" label="0101010110 (1) 0101000110" source="9876" target="10004" cy:directed="1"/>
      <edge id="13055" label="0101010110 (1) 0101110110" source="9876" target="9470" cy:directed="1"/>
      <edge id="13054" label="0101010110 (1) 0111010110" source="9876" target="9835" cy:directed="1"/>
      <edge id="13053" label="0101010110 (1) 0001010110" source="9876" target="9883" cy:directed="1"/>
      <edge id="13052" label="0111010100 (1) 0111010110" source="9875" target="9835" cy:directed="1"/>
      <edge id="13051" label="0111010100 (1) 0111010000" source="9875" target="10097" cy:directed="1"/>
      <edge id="13050" label="0111010100 (1) 0111011100" source="9875" target="9940" cy:directed="1"/>
      <edge id="13049" label="0111010100 (1) 0111000100" source="9875" target="10002" cy:directed="1"/>
      <edge id="13048" label="0111010100 (1) 0111110100" source="9875" target="9918" cy:directed="1"/>
      <edge id="13047" label="0111010100 (1) 0110010100" source="9875" target="9934" cy:directed="1"/>
      <edge id="13046" label="0111010100 (1) 0011010100" source="9875" target="9882" cy:directed="1"/>
      <edge id="13045" label="1101010110 (1) 1101010010" source="9874" target="10119" cy:directed="1"/>
      <edge id="13044" label="1101010110 (1) 1101000110" source="9874" target="10007" cy:directed="1"/>
      <edge id="13043" label="1101010110 (1) 1101110110" source="9874" target="9471" cy:directed="1"/>
      <edge id="13042" label="1101010110 (1) 1111010110" source="9874" target="9834" cy:directed="1"/>
      <edge id="13041" label="1101010110 (1) 1001010110" source="9874" target="9881" cy:directed="1"/>
      <edge id="13040" label="1111010100 (1) 1111010110" source="9873" target="9834" cy:directed="1"/>
      <edge id="13039" label="1111010100 (1) 1111010000" source="9873" target="10094" cy:directed="1"/>
      <edge id="13038" label="1111010100 (1) 1111011100" source="9873" target="9938" cy:directed="1"/>
      <edge id="13037" label="1111010100 (1) 1111000100" source="9873" target="10005" cy:directed="1"/>
      <edge id="13036" label="1111010100 (1) 1111110100" source="9873" target="9919" cy:directed="1"/>
      <edge id="13035" label="1111010100 (1) 1110010100" source="9873" target="9930" cy:directed="1"/>
      <edge id="13034" label="1111010100 (1) 1011010100" source="9873" target="9880" cy:directed="1"/>
      <edge id="13033" label="1110110010 (1) 1110110000" source="9872" target="10164" cy:directed="1"/>
      <edge id="13032" label="1110110010 (1) 1110010010" source="9872" target="10129" cy:directed="1"/>
      <edge id="13031" label="1110110010 (1) 1100110010" source="9872" target="9905" cy:directed="1"/>
      <edge id="13030" label="1110110010 (1) 1010110010" source="9872" target="9879" cy:directed="1"/>
      <edge id="13029" label="1000001100 (1) 1000001110" source="9871" target="9870" cy:directed="1"/>
      <edge id="13028" label="1000001100 (1) 1000001000" source="9871" target="10115" cy:directed="1"/>
      <edge id="13027" label="1000001100 (1) 1000000100" source="9871" target="10069" cy:directed="1"/>
      <edge id="13026" label="1000001100 (1) 1001001100" source="9871" target="9869" cy:directed="1"/>
      <edge id="13025" label="1000001100 (1) 1010001100" source="9871" target="9868" cy:directed="1"/>
      <edge id="13024" label="1000001100 (1) 1100001100" source="9871" target="9867" cy:directed="1"/>
      <edge id="13023" label="1000001110 (1) 1000001010" source="9870" target="10114" cy:directed="1"/>
      <edge id="13022" label="1000001110 (1) 1000000110" source="9870" target="10068" cy:directed="1"/>
      <edge id="13021" label="1000001110 (1) 1001001110" source="9870" target="9806" cy:directed="1"/>
      <edge id="13020" label="1000001110 (1) 1010001110" source="9870" target="9833" cy:directed="1"/>
      <edge id="13019" label="1000001110 (1) 1100001110" source="9870" target="9852" cy:directed="1"/>
      <edge id="13018" label="1001001100 (1) 1001001110" source="9869" target="9806" cy:directed="1"/>
      <edge id="13017" label="1001001100 (1) 1001001000" source="9869" target="10113" cy:directed="1"/>
      <edge id="13016" label="1001001100 (1) 1001000100" source="9869" target="10066" cy:directed="1"/>
      <edge id="13015" label="1001001100 (1) 1011001100" source="9869" target="9805" cy:directed="1"/>
      <edge id="13014" label="1001001100 (1) 1101001100" source="9869" target="9851" cy:directed="1"/>
      <edge id="13013" label="1010001100 (1) 1010001110" source="9868" target="9833" cy:directed="1"/>
      <edge id="13012" label="1010001100 (1) 1010001000" source="9868" target="10091" cy:directed="1"/>
      <edge id="13011" label="1010001100 (1) 1010000100" source="9868" target="10065" cy:directed="1"/>
      <edge id="13010" label="1010001100 (1) 1110001100" source="9868" target="9850" cy:directed="1"/>
      <edge id="13009" label="1100001100 (1) 1100001110" source="9867" target="9852" cy:directed="1"/>
      <edge id="13008" label="1100001100 (1) 1100001000" source="9867" target="10112" cy:directed="1"/>
      <edge id="13007" label="1100001100 (1) 1100000100" source="9867" target="10064" cy:directed="1"/>
      <edge id="13006" label="1100001100 (1) 1101001100" source="9867" target="9851" cy:directed="1"/>
      <edge id="13005" label="1100001100 (1) 1110001100" source="9867" target="9850" cy:directed="1"/>
      <edge id="13004" label="0000001100 (1) 0000001110" source="9866" target="9865" cy:directed="1"/>
      <edge id="13003" label="0000001100 (1) 0000001000" source="9866" target="10111" cy:directed="1"/>
      <edge id="13002" label="0000001100 (1) 0000000100" source="9866" target="10060" cy:directed="1"/>
      <edge id="13001" label="0000001100 (1) 0001001100" source="9866" target="9864" cy:directed="1"/>
      <edge id="13000" label="0000001100 (1) 0010001100" source="9866" target="9863" cy:directed="1"/>
      <edge id="12999" label="0000001110 (1) 0000001010" source="9865" target="10110" cy:directed="1"/>
      <edge id="12998" label="0000001110 (1) 0000000110" source="9865" target="10059" cy:directed="1"/>
      <edge id="12997" label="0000001110 (1) 0001001110" source="9865" target="9801" cy:directed="1"/>
      <edge id="12996" label="0000001110 (1) 0010001110" source="9865" target="9830" cy:directed="1"/>
      <edge id="12995" label="0001001100 (1) 0001001110" source="9864" target="9801" cy:directed="1"/>
      <edge id="12994" label="0001001100 (1) 0001001000" source="9864" target="10109" cy:directed="1"/>
      <edge id="12993" label="0001001100 (1) 0001000100" source="9864" target="10057" cy:directed="1"/>
      <edge id="12992" label="0001001100 (1) 0011001100" source="9864" target="9800" cy:directed="1"/>
      <edge id="12991" label="0010001100 (1) 0010001110" source="9863" target="9830" cy:directed="1"/>
      <edge id="12990" label="0010001100 (1) 0010001000" source="9863" target="10088" cy:directed="1"/>
      <edge id="12989" label="0010001100 (1) 0010000100" source="9863" target="10056" cy:directed="1"/>
      <edge id="12988" label="0110100010 (1) 0110100000" source="9862" target="10163" cy:directed="1"/>
      <edge id="12987" label="0110100010 (1) 0110110010" source="9862" target="9861" cy:directed="1"/>
      <edge id="12986" label="0110100010 (1) 0110000010" source="9862" target="10196" cy:directed="1"/>
      <edge id="12985" label="0110100010 (1) 0100100010" source="9862" target="9903" cy:directed="1"/>
      <edge id="12984" label="0110100010 (1) 0010100010" source="9862" target="9907" cy:directed="1"/>
      <edge id="12983" label="0110110010 (1) 0110110000" source="9861" target="10162" cy:directed="1"/>
      <edge id="12982" label="0110110010 (1) 0110010010" source="9861" target="10125" cy:directed="1"/>
      <edge id="12981" label="0110110010 (1) 0100110010" source="9861" target="9902" cy:directed="1"/>
      <edge id="12980" label="0110110010 (1) 0010110010" source="9861" target="9877" cy:directed="1"/>
      <edge id="12979" label="1010000001 (1) 1010000011" source="9860" target="9859" cy:directed="1"/>
      <edge id="12978" label="1010000001 (1) 1010000101" source="9860" target="9858" cy:directed="1"/>
      <edge id="12977" label="1010000001 (1) 1000000001" source="9860" target="9897" cy:directed="1"/>
      <edge id="12976" label="1010000001 (1) 1110000001" source="9860" target="9857" cy:directed="1"/>
      <edge id="12975" label="1010000011 (1) 1010000111" source="9859" target="9493" cy:directed="1"/>
      <edge id="12974" label="1010000011 (1) 1000000011" source="9859" target="9896" cy:directed="1"/>
      <edge id="12973" label="1010000011 (1) 1110000011" source="9859" target="9844" cy:directed="1"/>
      <edge id="12972" label="1010000101 (1) 1010000111" source="9858" target="9493" cy:directed="1"/>
      <edge id="12971" label="1010000101 (1) 1010100101" source="9858" target="9750" cy:directed="1"/>
      <edge id="12970" label="1010000101 (1) 1110000101" source="9858" target="9843" cy:directed="1"/>
      <edge id="12969" label="1110000001 (1) 1110000011" source="9857" target="9844" cy:directed="1"/>
      <edge id="12968" label="1110000001 (1) 1110000101" source="9857" target="9843" cy:directed="1"/>
      <edge id="12967" label="1110000001 (1) 1100000001" source="9857" target="9893" cy:directed="1"/>
      <edge id="12966" label="0010000001 (1) 0010000011" source="9856" target="9855" cy:directed="1"/>
      <edge id="12965" label="0010000001 (1) 0010000101" source="9856" target="9854" cy:directed="1"/>
      <edge id="12964" label="0010000001 (1) 0000000001" source="9856" target="9901" cy:directed="1"/>
      <edge id="12963" label="0010000011 (1) 0010000111" source="9855" target="9494" cy:directed="1"/>
      <edge id="12962" label="0010000011 (1) 0000000011" source="9855" target="9900" cy:directed="1"/>
      <edge id="12961" label="0010000101 (1) 0010000111" source="9854" target="9494" cy:directed="1"/>
      <edge id="12960" label="0010000101 (1) 0010100101" source="9854" target="9752" cy:directed="1"/>
      <edge id="12959" label="1001111100 (1) 1001011100" source="9853" target="9967" cy:directed="1"/>
      <edge id="12958" label="1001111100 (1) 1011111100" source="9853" target="9823" cy:directed="1"/>
      <edge id="12957" label="1100001110 (1) 1100001010" source="9852" target="10108" cy:directed="1"/>
      <edge id="12956" label="1100001110 (1) 1100000110" source="9852" target="10052" cy:directed="1"/>
      <edge id="12955" label="1100001110 (1) 1101001110" source="9852" target="9794" cy:directed="1"/>
      <edge id="12954" label="1100001110 (1) 1110001110" source="9852" target="9822" cy:directed="1"/>
      <edge id="12953" label="1101001100 (1) 1101001110" source="9851" target="9794" cy:directed="1"/>
      <edge id="12952" label="1101001100 (1) 1101001000" source="9851" target="10107" cy:directed="1"/>
      <edge id="12951" label="1101001100 (1) 1101000100" source="9851" target="10050" cy:directed="1"/>
      <edge id="12950" label="1101001100 (1) 1101101100" source="9851" target="9793" cy:directed="1"/>
      <edge id="12949" label="1101001100 (1) 1111001100" source="9851" target="9792" cy:directed="1"/>
      <edge id="12948" label="1110001100 (1) 1110001110" source="9850" target="9822" cy:directed="1"/>
      <edge id="12947" label="1110001100 (1) 1110001000" source="9850" target="10089" cy:directed="1"/>
      <edge id="12946" label="1110001100 (1) 1110000100" source="9850" target="10049" cy:directed="1"/>
      <edge id="12945" label="0001111100 (1) 0001011100" source="9849" target="9965" cy:directed="1"/>
      <edge id="12944" label="0001111100 (1) 0011111100" source="9849" target="9821" cy:directed="1"/>
      <edge id="12943" label="0100001100 (1) 0100001110" source="9848" target="9847" cy:directed="1"/>
      <edge id="12942" label="0100001100 (1) 0100001000" source="9848" target="10106" cy:directed="1"/>
      <edge id="12941" label="0100001100 (1) 0100000100" source="9848" target="10045" cy:directed="1"/>
      <edge id="12940" label="0100001100 (1) 0101001100" source="9848" target="9846" cy:directed="1"/>
      <edge id="12939" label="0100001100 (1) 0110001100" source="9848" target="9845" cy:directed="1"/>
      <edge id="12938" label="0100001100 (1) 0000001100" source="9848" target="9866" cy:directed="1"/>
      <edge id="12937" label="0100001110 (1) 0100001010" source="9847" target="10105" cy:directed="1"/>
      <edge id="12936" label="0100001110 (1) 0100000110" source="9847" target="10044" cy:directed="1"/>
      <edge id="12935" label="0100001110 (1) 0101001110" source="9847" target="9791" cy:directed="1"/>
      <edge id="12934" label="0100001110 (1) 0110001110" source="9847" target="9826" cy:directed="1"/>
      <edge id="12933" label="0100001110 (1) 0000001110" source="9847" target="9865" cy:directed="1"/>
      <edge id="12932" label="0101001100 (1) 0101001110" source="9846" target="9791" cy:directed="1"/>
      <edge id="12931" label="0101001100 (1) 0101001000" source="9846" target="10104" cy:directed="1"/>
      <edge id="12930" label="0101001100 (1) 0101000100" source="9846" target="10042" cy:directed="1"/>
      <edge id="12929" label="0101001100 (1) 0101101100" source="9846" target="9790" cy:directed="1"/>
      <edge id="12928" label="0101001100 (1) 0111001100" source="9846" target="9789" cy:directed="1"/>
      <edge id="12927" label="0101001100 (1) 0001001100" source="9846" target="9864" cy:directed="1"/>
      <edge id="12926" label="0110001100 (1) 0110001110" source="9845" target="9826" cy:directed="1"/>
      <edge id="12925" label="0110001100 (1) 0110001000" source="9845" target="10083" cy:directed="1"/>
      <edge id="12924" label="0110001100 (1) 0110000100" source="9845" target="10041" cy:directed="1"/>
      <edge id="12923" label="0110001100 (1) 0010001100" source="9845" target="9863" cy:directed="1"/>
      <edge id="12922" label="1110000011 (1) 1110000111" source="9844" target="9489" cy:directed="1"/>
      <edge id="12921" label="1110000011 (1) 1100000011" source="9844" target="9890" cy:directed="1"/>
      <edge id="12920" label="1110000101 (1) 1110000111" source="9843" target="9489" cy:directed="1"/>
      <edge id="12919" label="1110000101 (1) 1110100101" source="9843" target="9744" cy:directed="1"/>
      <edge id="12918" label="0110000001 (1) 0110000011" source="9842" target="9841" cy:directed="1"/>
      <edge id="12917" label="0110000001 (1) 0110000101" source="9842" target="9840" cy:directed="1"/>
      <edge id="12916" label="0110000001 (1) 0100000001" source="9842" target="9887" cy:directed="1"/>
      <edge id="12915" label="0110000001 (1) 0010000001" source="9842" target="9856" cy:directed="1"/>
      <edge id="12914" label="0110000011 (1) 0110000111" source="9841" target="9486" cy:directed="1"/>
      <edge id="12913" label="0110000011 (1) 0100000011" source="9841" target="9886" cy:directed="1"/>
      <edge id="12912" label="0110000011 (1) 0010000011" source="9841" target="9855" cy:directed="1"/>
      <edge id="12911" label="0110000101 (1) 0110000111" source="9840" target="9486" cy:directed="1"/>
      <edge id="12910" label="0110000101 (1) 0110100101" source="9840" target="9741" cy:directed="1"/>
      <edge id="12909" label="0110000101 (1) 0010000101" source="9840" target="9854" cy:directed="1"/>
      <edge id="12908" label="1101111100 (1) 1111111100" source="9839" target="9817" cy:directed="1"/>
      <edge id="12907" label="1101111100 (1) 1001111100" source="9839" target="9853" cy:directed="1"/>
      <edge id="12906" label="0101111100 (1) 0111111100" source="9838" target="9816" cy:directed="1"/>
      <edge id="12905" label="0101111100 (1) 0001111100" source="9838" target="9849" cy:directed="1"/>
      <edge id="12904" label="0011010110 (1) 0011010010" source="9837" target="10099" cy:directed="1"/>
      <edge id="12903" label="0011010110 (1) 0011000110" source="9837" target="9991" cy:directed="1"/>
      <edge id="12902" label="0011010110 (1) 0011110110" source="9837" target="9461" cy:directed="1"/>
      <edge id="12901" label="0011010110 (1) 0010010110" source="9837" target="9921" cy:directed="1"/>
      <edge id="12900" label="1011010110 (1) 1011010010" source="9836" target="10102" cy:directed="1"/>
      <edge id="12899" label="1011010110 (1) 1011000110" source="9836" target="9993" cy:directed="1"/>
      <edge id="12898" label="1011010110 (1) 1011110110" source="9836" target="9463" cy:directed="1"/>
      <edge id="12897" label="1011010110 (1) 1010010110" source="9836" target="9920" cy:directed="1"/>
      <edge id="12896" label="0111010110 (1) 0111010010" source="9835" target="10096" cy:directed="1"/>
      <edge id="12895" label="0111010110 (1) 0111000110" source="9835" target="9985" cy:directed="1"/>
      <edge id="12894" label="0111010110 (1) 0111110110" source="9835" target="9450" cy:directed="1"/>
      <edge id="12893" label="0111010110 (1) 0110010110" source="9835" target="9917" cy:directed="1"/>
      <edge id="12892" label="0111010110 (1) 0011010110" source="9835" target="9837" cy:directed="1"/>
      <edge id="12891" label="1111010110 (1) 1111010010" source="9834" target="10093" cy:directed="1"/>
      <edge id="12890" label="1111010110 (1) 1111000110" source="9834" target="9987" cy:directed="1"/>
      <edge id="12889" label="1111010110 (1) 1111110110" source="9834" target="9451" cy:directed="1"/>
      <edge id="12888" label="1111010110 (1) 1110010110" source="9834" target="9916" cy:directed="1"/>
      <edge id="12887" label="1111010110 (1) 1011010110" source="9834" target="9836" cy:directed="1"/>
      <edge id="12886" label="1010001110 (1) 1010001010" source="9833" target="10090" cy:directed="1"/>
      <edge id="12885" label="1010001110 (1) 1010000110" source="9833" target="10028" cy:directed="1"/>
      <edge id="12884" label="1010001110 (1) 1110001110" source="9833" target="9822" cy:directed="1"/>
      <edge id="12883" label="1001110010 (1) 1001110000" source="9832" target="10161" cy:directed="1"/>
      <edge id="12882" label="1001110010 (1) 1001010010" source="9832" target="10123" cy:directed="1"/>
      <edge id="12881" label="1001110010 (1) 1011110010" source="9832" target="9809" cy:directed="1"/>
      <edge id="12880" label="1011100010 (1) 1011100000" source="9831" target="10160" cy:directed="1"/>
      <edge id="12879" label="1011100010 (1) 1011110010" source="9831" target="9809" cy:directed="1"/>
      <edge id="12878" label="1011100010 (1) 1011000010" source="9831" target="10188" cy:directed="1"/>
      <edge id="12877" label="1011100010 (1) 1010100010" source="9831" target="9912" cy:directed="1"/>
      <edge id="12876" label="1011100010 (1) 1111100010" source="9831" target="9927" cy:directed="1"/>
      <edge id="12875" label="0010001110 (1) 0010001010" source="9830" target="10087" cy:directed="1"/>
      <edge id="12874" label="0010001110 (1) 0010000110" source="9830" target="10026" cy:directed="1"/>
      <edge id="12873" label="0001110010 (1) 0001110000" source="9829" target="10155" cy:directed="1"/>
      <edge id="12872" label="0001110010 (1) 0001010010" source="9829" target="10121" cy:directed="1"/>
      <edge id="12871" label="0001110010 (1) 0011110010" source="9829" target="9808" cy:directed="1"/>
      <edge id="12870" label="0011100010 (1) 0011100000" source="9828" target="10154" cy:directed="1"/>
      <edge id="12869" label="0011100010 (1) 0011110010" source="9828" target="9808" cy:directed="1"/>
      <edge id="12868" label="0011100010 (1) 0011000010" source="9828" target="10185" cy:directed="1"/>
      <edge id="12867" label="0011100010 (1) 0010100010" source="9828" target="9907" cy:directed="1"/>
      <edge id="12866" label="1101110010 (1) 1101110000" source="9827" target="10149" cy:directed="1"/>
      <edge id="12865" label="1101110010 (1) 1001110010" source="9827" target="9832" cy:directed="1"/>
      <edge id="12864" label="0110001110 (1) 0110001010" source="9826" target="10082" cy:directed="1"/>
      <edge id="12863" label="0110001110 (1) 0110000110" source="9826" target="10019" cy:directed="1"/>
      <edge id="12862" label="0110001110 (1) 0010001110" source="9826" target="9830" cy:directed="1"/>
      <edge id="12861" label="0001000011 (1) 0001000111" source="9825" target="9468" cy:directed="1"/>
      <edge id="12860" label="0001000101 (1) 0001000111" source="9824" target="9468" cy:directed="1"/>
      <edge id="12859" label="0001000101 (1) 0001100101" source="9824" target="9729" cy:directed="1"/>
      <edge id="12858" label="0001000101 (1) 0011000101" source="9824" target="9802" cy:directed="1"/>
      <edge id="12857" label="1011111100 (1) 1011011100" source="9823" target="9956" cy:directed="1"/>
      <edge id="12856" label="1011111100 (1) 1010111100" source="9823" target="9906" cy:directed="1"/>
      <edge id="12855" label="1110001110 (1) 1110001010" source="9822" target="10085" cy:directed="1"/>
      <edge id="12854" label="1110001110 (1) 1110000110" source="9822" target="10022" cy:directed="1"/>
      <edge id="12853" label="0011111100 (1) 0011011100" source="9821" target="9952" cy:directed="1"/>
      <edge id="12852" label="0011111100 (1) 0010111100" source="9821" target="9904" cy:directed="1"/>
      <edge id="12851" label="1001000011 (1) 1001000111" source="9820" target="9469" cy:directed="1"/>
      <edge id="12850" label="1001000011 (1) 1101000011" source="9820" target="9815" cy:directed="1"/>
      <edge id="12849" label="1001000101 (1) 1001000111" source="9819" target="9469" cy:directed="1"/>
      <edge id="12848" label="1001000101 (1) 1001100101" source="9819" target="9726" cy:directed="1"/>
      <edge id="12847" label="1001000101 (1) 1011000101" source="9819" target="9796" cy:directed="1"/>
      <edge id="12846" label="1001000101 (1) 1101000101" source="9819" target="9814" cy:directed="1"/>
      <edge id="12845" label="0101110010 (1) 0101110000" source="9818" target="10144" cy:directed="1"/>
      <edge id="12844" label="0101110010 (1) 0001110010" source="9818" target="9829" cy:directed="1"/>
      <edge id="12843" label="1111111100 (1) 1110111100" source="9817" target="9892" cy:directed="1"/>
      <edge id="12842" label="1111111100 (1) 1011111100" source="9817" target="9823" cy:directed="1"/>
      <edge id="12841" label="0111111100 (1) 0110111100" source="9816" target="9891" cy:directed="1"/>
      <edge id="12840" label="0111111100 (1) 0011111100" source="9816" target="9821" cy:directed="1"/>
      <edge id="12839" label="1101000011 (1) 1101000111" source="9815" target="9467" cy:directed="1"/>
      <edge id="12838" label="1101000011 (1) 1101100011" source="9815" target="9402" cy:directed="1"/>
      <edge id="12837" label="1101000101 (1) 1101000111" source="9814" target="9467" cy:directed="1"/>
      <edge id="12836" label="1101000101 (1) 1101100101" source="9814" target="9723" cy:directed="1"/>
      <edge id="12835" label="1101000101 (1) 1111000101" source="9814" target="9787" cy:directed="1"/>
      <edge id="12834" label="1101100001 (1) 1101100101" source="9813" target="9723" cy:directed="1"/>
      <edge id="12833" label="1101100001 (1) 1101110001" source="9813" target="9722" cy:directed="1"/>
      <edge id="12832" label="0101000011 (1) 0101000111" source="9812" target="9466" cy:directed="1"/>
      <edge id="12831" label="0101000011 (1) 0101100011" source="9812" target="9400" cy:directed="1"/>
      <edge id="12830" label="0101000011 (1) 0001000011" source="9812" target="9825" cy:directed="1"/>
      <edge id="12829" label="0101000101 (1) 0101000111" source="9811" target="9466" cy:directed="1"/>
      <edge id="12828" label="0101000101 (1) 0101100101" source="9811" target="9716" cy:directed="1"/>
      <edge id="12827" label="0101000101 (1) 0111000101" source="9811" target="9783" cy:directed="1"/>
      <edge id="12826" label="0101000101 (1) 0001000101" source="9811" target="9824" cy:directed="1"/>
      <edge id="12825" label="0101100001 (1) 0101100101" source="9810" target="9716" cy:directed="1"/>
      <edge id="12824" label="0101100001 (1) 0101110001" source="9810" target="9715" cy:directed="1"/>
      <edge id="12823" label="0101100001 (1) 0001100001" source="9810" target="9778" cy:directed="1"/>
      <edge id="12822" label="1011110010 (1) 1011110000" source="9809" target="10139" cy:directed="1"/>
      <edge id="12821" label="1011110010 (1) 1011010010" source="9809" target="10102" cy:directed="1"/>
      <edge id="12820" label="1011110010 (1) 1010110010" source="9809" target="9879" cy:directed="1"/>
      <edge id="12819" label="0011110010 (1) 0011110000" source="9808" target="10135" cy:directed="1"/>
      <edge id="12818" label="0011110010 (1) 0011010010" source="9808" target="10099" cy:directed="1"/>
      <edge id="12817" label="0011110010 (1) 0010110010" source="9808" target="9877" cy:directed="1"/>
      <edge id="12816" label="1111110010 (1) 1111110000" source="9807" target="10131" cy:directed="1"/>
      <edge id="12815" label="1111110010 (1) 1110110010" source="9807" target="9872" cy:directed="1"/>
      <edge id="12814" label="1111110010 (1) 1101110010" source="9807" target="9827" cy:directed="1"/>
      <edge id="12813" label="1111110010 (1) 1011110010" source="9807" target="9809" cy:directed="1"/>
      <edge id="12812" label="1001001110 (1) 1001001010" source="9806" target="10078" cy:directed="1"/>
      <edge id="12811" label="1001001110 (1) 1001000110" source="9806" target="10013" cy:directed="1"/>
      <edge id="12810" label="1001001110 (1) 1011001110" source="9806" target="9770" cy:directed="1"/>
      <edge id="12809" label="1001001110 (1) 1101001110" source="9806" target="9794" cy:directed="1"/>
      <edge id="12808" label="1011001100 (1) 1011001110" source="9805" target="9770" cy:directed="1"/>
      <edge id="12807" label="1011001100 (1) 1011001000" source="9805" target="10063" cy:directed="1"/>
      <edge id="12806" label="1011001100 (1) 1011000100" source="9805" target="10011" cy:directed="1"/>
      <edge id="12805" label="1011001100 (1) 1010001100" source="9805" target="9868" cy:directed="1"/>
      <edge id="12804" label="1011001100 (1) 1111001100" source="9805" target="9792" cy:directed="1"/>
      <edge id="12803" label="0011000001 (1) 0011000011" source="9804" target="9803" cy:directed="1"/>
      <edge id="12802" label="0011000001 (1) 0011000101" source="9804" target="9802" cy:directed="1"/>
      <edge id="12801" label="0011000001 (1) 0010000001" source="9804" target="9856" cy:directed="1"/>
      <edge id="12800" label="0011000001 (1) 0001000001" source="9804" target="9898" cy:directed="1"/>
      <edge id="12799" label="0011000011 (1) 0011000111" source="9803" target="9447" cy:directed="1"/>
      <edge id="12798" label="0011000011 (1) 0010000011" source="9803" target="9855" cy:directed="1"/>
      <edge id="12797" label="0011000011 (1) 0001000011" source="9803" target="9825" cy:directed="1"/>
      <edge id="12796" label="0011000101 (1) 0011000111" source="9802" target="9447" cy:directed="1"/>
      <edge id="12795" label="0011000101 (1) 0011100101" source="9802" target="9705" cy:directed="1"/>
      <edge id="12794" label="0011000101 (1) 0010000101" source="9802" target="9854" cy:directed="1"/>
      <edge id="12793" label="0001001110 (1) 0001001010" source="9801" target="10076" cy:directed="1"/>
      <edge id="12792" label="0001001110 (1) 0001000110" source="9801" target="10010" cy:directed="1"/>
      <edge id="12791" label="0001001110 (1) 0011001110" source="9801" target="9769" cy:directed="1"/>
      <edge id="12790" label="0011001100 (1) 0011001110" source="9800" target="9769" cy:directed="1"/>
      <edge id="12789" label="0011001100 (1) 0011001000" source="9800" target="10055" cy:directed="1"/>
      <edge id="12788" label="0011001100 (1) 0011000100" source="9800" target="10008" cy:directed="1"/>
      <edge id="12787" label="0011001100 (1) 0010001100" source="9800" target="9863" cy:directed="1"/>
      <edge id="12786" label="0111110010 (1) 0111110000" source="9799" target="10127" cy:directed="1"/>
      <edge id="12785" label="0111110010 (1) 0110110010" source="9799" target="9861" cy:directed="1"/>
      <edge id="12784" label="0111110010 (1) 0101110010" source="9799" target="9818" cy:directed="1"/>
      <edge id="12783" label="0111110010 (1) 0011110010" source="9799" target="9808" cy:directed="1"/>
      <edge id="12782" label="1011000001 (1) 1011000011" source="9798" target="9797" cy:directed="1"/>
      <edge id="12781" label="1011000001 (1) 1011000101" source="9798" target="9796" cy:directed="1"/>
      <edge id="12780" label="1011000001 (1) 1010000001" source="9798" target="9860" cy:directed="1"/>
      <edge id="12779" label="1011000001 (1) 1001000001" source="9798" target="9894" cy:directed="1"/>
      <edge id="12778" label="1011000001 (1) 1111000001" source="9798" target="9795" cy:directed="1"/>
      <edge id="12777" label="1011000011 (1) 1011000111" source="9797" target="9446" cy:directed="1"/>
      <edge id="12776" label="1011000011 (1) 1010000011" source="9797" target="9859" cy:directed="1"/>
      <edge id="12775" label="1011000011 (1) 1001000011" source="9797" target="9820" cy:directed="1"/>
      <edge id="12774" label="1011000011 (1) 1111000011" source="9797" target="9788" cy:directed="1"/>
      <edge id="12773" label="1011000101 (1) 1011000111" source="9796" target="9446" cy:directed="1"/>
      <edge id="12772" label="1011000101 (1) 1011100101" source="9796" target="9698" cy:directed="1"/>
      <edge id="12771" label="1011000101 (1) 1010000101" source="9796" target="9858" cy:directed="1"/>
      <edge id="12770" label="1011000101 (1) 1111000101" source="9796" target="9787" cy:directed="1"/>
      <edge id="12769" label="1111000001 (1) 1111000011" source="9795" target="9788" cy:directed="1"/>
      <edge id="12768" label="1111000001 (1) 1111000101" source="9795" target="9787" cy:directed="1"/>
      <edge id="12767" label="1111000001 (1) 1111100001" source="9795" target="9786" cy:directed="1"/>
      <edge id="12766" label="1111000001 (1) 1110000001" source="9795" target="9857" cy:directed="1"/>
      <edge id="12765" label="1111000001 (1) 1101000001" source="9795" target="9888" cy:directed="1"/>
      <edge id="12764" label="1101001110 (1) 1101001010" source="9794" target="10074" cy:directed="1"/>
      <edge id="12763" label="1101001110 (1) 1101000110" source="9794" target="10007" cy:directed="1"/>
      <edge id="12762" label="1101001110 (1) 1101101110" source="9794" target="9390" cy:directed="1"/>
      <edge id="12761" label="1101001110 (1) 1111001110" source="9794" target="9763" cy:directed="1"/>
      <edge id="12760" label="1101101100 (1) 1101101000" source="9793" target="10073" cy:directed="1"/>
      <edge id="12759" label="1101101100 (1) 1101100100" source="9793" target="10006" cy:directed="1"/>
      <edge id="12758" label="1101101100 (1) 1101111100" source="9793" target="9839" cy:directed="1"/>
      <edge id="12757" label="1101101100 (1) 1111101100" source="9793" target="9762" cy:directed="1"/>
      <edge id="12756" label="1111001100 (1) 1111001110" source="9792" target="9763" cy:directed="1"/>
      <edge id="12755" label="1111001100 (1) 1111001000" source="9792" target="10061" cy:directed="1"/>
      <edge id="12754" label="1111001100 (1) 1111000100" source="9792" target="10005" cy:directed="1"/>
      <edge id="12753" label="1111001100 (1) 1111101100" source="9792" target="9762" cy:directed="1"/>
      <edge id="12752" label="1111001100 (1) 1110001100" source="9792" target="9850" cy:directed="1"/>
      <edge id="12751" label="0101001110 (1) 0101001010" source="9791" target="10071" cy:directed="1"/>
      <edge id="12750" label="0101001110 (1) 0101000110" source="9791" target="10004" cy:directed="1"/>
      <edge id="12749" label="0101001110 (1) 0101101110" source="9791" target="9387" cy:directed="1"/>
      <edge id="12748" label="0101001110 (1) 0111001110" source="9791" target="9761" cy:directed="1"/>
      <edge id="12747" label="0101001110 (1) 0001001110" source="9791" target="9801" cy:directed="1"/>
      <edge id="12746" label="0101101100 (1) 0101101000" source="9790" target="10070" cy:directed="1"/>
      <edge id="12745" label="0101101100 (1) 0101100100" source="9790" target="10003" cy:directed="1"/>
      <edge id="12744" label="0101101100 (1) 0101111100" source="9790" target="9838" cy:directed="1"/>
      <edge id="12743" label="0101101100 (1) 0111101100" source="9790" target="9760" cy:directed="1"/>
      <edge id="12742" label="0101101100 (1) 0001101100" source="9790" target="9758" cy:directed="1"/>
      <edge id="12741" label="0111001100 (1) 0111001110" source="9789" target="9761" cy:directed="1"/>
      <edge id="12740" label="0111001100 (1) 0111001000" source="9789" target="10040" cy:directed="1"/>
      <edge id="12739" label="0111001100 (1) 0111000100" source="9789" target="10002" cy:directed="1"/>
      <edge id="12738" label="0111001100 (1) 0111101100" source="9789" target="9760" cy:directed="1"/>
      <edge id="12737" label="0111001100 (1) 0110001100" source="9789" target="9845" cy:directed="1"/>
      <edge id="12736" label="0111001100 (1) 0011001100" source="9789" target="9800" cy:directed="1"/>
      <edge id="12735" label="1111000011 (1) 1111000111" source="9788" target="9441" cy:directed="1"/>
      <edge id="12734" label="1111000011 (1) 1111100011" source="9788" target="9386" cy:directed="1"/>
      <edge id="12733" label="1111000011 (1) 1110000011" source="9788" target="9844" cy:directed="1"/>
      <edge id="12732" label="1111000011 (1) 1101000011" source="9788" target="9815" cy:directed="1"/>
      <edge id="12731" label="1111000101 (1) 1111000111" source="9787" target="9441" cy:directed="1"/>
      <edge id="12730" label="1111000101 (1) 1111100101" source="9787" target="9689" cy:directed="1"/>
      <edge id="12729" label="1111000101 (1) 1110000101" source="9787" target="9843" cy:directed="1"/>
      <edge id="12728" label="1111100001 (1) 1111100101" source="9786" target="9689" cy:directed="1"/>
      <edge id="12727" label="1111100001 (1) 1111110001" source="9786" target="9688" cy:directed="1"/>
      <edge id="12726" label="1111100001 (1) 1110100001" source="9786" target="9748" cy:directed="1"/>
      <edge id="12725" label="1111100001 (1) 1101100001" source="9786" target="9813" cy:directed="1"/>
      <edge id="12724" label="0111000001 (1) 0111000011" source="9785" target="9784" cy:directed="1"/>
      <edge id="12723" label="0111000001 (1) 0111000101" source="9785" target="9783" cy:directed="1"/>
      <edge id="12722" label="0111000001 (1) 0111100001" source="9785" target="9782" cy:directed="1"/>
      <edge id="12721" label="0111000001 (1) 0110000001" source="9785" target="9842" cy:directed="1"/>
      <edge id="12720" label="0111000001 (1) 0101000001" source="9785" target="9884" cy:directed="1"/>
      <edge id="12719" label="0111000001 (1) 0011000001" source="9785" target="9804" cy:directed="1"/>
      <edge id="12718" label="0111000011 (1) 0111000111" source="9784" target="9440" cy:directed="1"/>
      <edge id="12717" label="0111000011 (1) 0111100011" source="9784" target="9388" cy:directed="1"/>
      <edge id="12716" label="0111000011 (1) 0110000011" source="9784" target="9841" cy:directed="1"/>
      <edge id="12715" label="0111000011 (1) 0101000011" source="9784" target="9812" cy:directed="1"/>
      <edge id="12714" label="0111000011 (1) 0011000011" source="9784" target="9803" cy:directed="1"/>
      <edge id="12713" label="0111000101 (1) 0111000111" source="9783" target="9440" cy:directed="1"/>
      <edge id="12712" label="0111000101 (1) 0111100101" source="9783" target="9683" cy:directed="1"/>
      <edge id="12711" label="0111000101 (1) 0110000101" source="9783" target="9840" cy:directed="1"/>
      <edge id="12710" label="0111000101 (1) 0011000101" source="9783" target="9802" cy:directed="1"/>
      <edge id="12709" label="0111100001 (1) 0111100101" source="9782" target="9683" cy:directed="1"/>
      <edge id="12708" label="0111100001 (1) 0111110001" source="9782" target="9682" cy:directed="1"/>
      <edge id="12707" label="0111100001 (1) 0110100001" source="9782" target="9742" cy:directed="1"/>
      <edge id="12706" label="0111100001 (1) 0101100001" source="9782" target="9810" cy:directed="1"/>
      <edge id="12705" label="0111100001 (1) 0011100001" source="9782" target="9727" cy:directed="1"/>
      <edge id="12704" label="0000100001 (1) 0000100101" source="9781" target="9780" cy:directed="1"/>
      <edge id="12703" label="0000100001 (1) 0000110001" source="9781" target="9779" cy:directed="1"/>
      <edge id="12702" label="0000100001 (1) 0000000001" source="9781" target="9901" cy:directed="1"/>
      <edge id="12701" label="0000100001 (1) 0001100001" source="9781" target="9778" cy:directed="1"/>
      <edge id="12700" label="0000100001 (1) 0010100001" source="9781" target="9777" cy:directed="1"/>
      <edge id="12699" label="0000100101 (1) 0000110101" source="9780" target="9581" cy:directed="1"/>
      <edge id="12698" label="0000100101 (1) 0001100101" source="9780" target="9729" cy:directed="1"/>
      <edge id="12697" label="0000100101 (1) 0010100101" source="9780" target="9752" cy:directed="1"/>
      <edge id="12696" label="0000110001 (1) 0000110101" source="9779" target="9581" cy:directed="1"/>
      <edge id="12695" label="0000110001 (1) 0000111001" source="9779" target="9580" cy:directed="1"/>
      <edge id="12694" label="0000110001 (1) 0000010001" source="9779" target="9734" cy:directed="1"/>
      <edge id="12693" label="0000110001 (1) 0001110001" source="9779" target="9728" cy:directed="1"/>
      <edge id="12692" label="0000110001 (1) 0010110001" source="9779" target="9751" cy:directed="1"/>
      <edge id="12691" label="0001100001 (1) 0001100101" source="9778" target="9729" cy:directed="1"/>
      <edge id="12690" label="0001100001 (1) 0001110001" source="9778" target="9728" cy:directed="1"/>
      <edge id="12689" label="0001100001 (1) 0001000001" source="9778" target="9898" cy:directed="1"/>
      <edge id="12688" label="0001100001 (1) 0011100001" source="9778" target="9727" cy:directed="1"/>
      <edge id="12687" label="0010100001 (1) 0010100101" source="9777" target="9752" cy:directed="1"/>
      <edge id="12686" label="0010100001 (1) 0010110001" source="9777" target="9751" cy:directed="1"/>
      <edge id="12685" label="0010100001 (1) 0010000001" source="9777" target="9856" cy:directed="1"/>
      <edge id="12684" label="1000100001 (1) 1000100101" source="9776" target="9775" cy:directed="1"/>
      <edge id="12683" label="1000100001 (1) 1000110001" source="9776" target="9774" cy:directed="1"/>
      <edge id="12682" label="1000100001 (1) 1000000001" source="9776" target="9897" cy:directed="1"/>
      <edge id="12681" label="1000100001 (1) 1001100001" source="9776" target="9773" cy:directed="1"/>
      <edge id="12680" label="1000100001 (1) 1010100001" source="9776" target="9772" cy:directed="1"/>
      <edge id="12679" label="1000100001 (1) 1100100001" source="9776" target="9771" cy:directed="1"/>
      <edge id="12678" label="1000100101 (1) 1000110101" source="9775" target="9586" cy:directed="1"/>
      <edge id="12677" label="1000100101 (1) 1001100101" source="9775" target="9726" cy:directed="1"/>
      <edge id="12676" label="1000100101 (1) 1010100101" source="9775" target="9750" cy:directed="1"/>
      <edge id="12675" label="1000100101 (1) 1100100101" source="9775" target="9768" cy:directed="1"/>
      <edge id="12674" label="1000110001 (1) 1000110101" source="9774" target="9586" cy:directed="1"/>
      <edge id="12673" label="1000110001 (1) 1000111001" source="9774" target="9585" cy:directed="1"/>
      <edge id="12672" label="1000110001 (1) 1000010001" source="9774" target="9739" cy:directed="1"/>
      <edge id="12671" label="1000110001 (1) 1001110001" source="9774" target="9725" cy:directed="1"/>
      <edge id="12670" label="1000110001 (1) 1010110001" source="9774" target="9749" cy:directed="1"/>
      <edge id="12669" label="1001100001 (1) 1001100101" source="9773" target="9726" cy:directed="1"/>
      <edge id="12668" label="1001100001 (1) 1001110001" source="9773" target="9725" cy:directed="1"/>
      <edge id="12667" label="1001100001 (1) 1001000001" source="9773" target="9894" cy:directed="1"/>
      <edge id="12666" label="1001100001 (1) 1011100001" source="9773" target="9724" cy:directed="1"/>
      <edge id="12665" label="1001100001 (1) 1101100001" source="9773" target="9813" cy:directed="1"/>
      <edge id="12664" label="1010100001 (1) 1010100101" source="9772" target="9750" cy:directed="1"/>
      <edge id="12663" label="1010100001 (1) 1010110001" source="9772" target="9749" cy:directed="1"/>
      <edge id="12662" label="1010100001 (1) 1010000001" source="9772" target="9860" cy:directed="1"/>
      <edge id="12661" label="1010100001 (1) 1110100001" source="9772" target="9748" cy:directed="1"/>
      <edge id="12660" label="1100100001 (1) 1100100101" source="9771" target="9768" cy:directed="1"/>
      <edge id="12659" label="1100100001 (1) 1100110001" source="9771" target="9767" cy:directed="1"/>
      <edge id="12658" label="1100100001 (1) 1100000001" source="9771" target="9893" cy:directed="1"/>
      <edge id="12657" label="1100100001 (1) 1101100001" source="9771" target="9813" cy:directed="1"/>
      <edge id="12656" label="1011001110 (1) 1011001010" source="9770" target="10062" cy:directed="1"/>
      <edge id="12655" label="1011001110 (1) 1011000110" source="9770" target="9993" cy:directed="1"/>
      <edge id="12654" label="1011001110 (1) 1010001110" source="9770" target="9833" cy:directed="1"/>
      <edge id="12653" label="1011001110 (1) 1111001110" source="9770" target="9763" cy:directed="1"/>
      <edge id="12652" label="0011001110 (1) 0011001010" source="9769" target="10054" cy:directed="1"/>
      <edge id="12651" label="0011001110 (1) 0011000110" source="9769" target="9991" cy:directed="1"/>
      <edge id="12650" label="0011001110 (1) 0010001110" source="9769" target="9830" cy:directed="1"/>
      <edge id="12649" label="1100100101 (1) 1100110101" source="9768" target="9575" cy:directed="1"/>
      <edge id="12648" label="1100100101 (1) 1101100101" source="9768" target="9723" cy:directed="1"/>
      <edge id="12647" label="1100100101 (1) 1110100101" source="9768" target="9744" cy:directed="1"/>
      <edge id="12646" label="1100110001 (1) 1100110101" source="9767" target="9575" cy:directed="1"/>
      <edge id="12645" label="1100110001 (1) 1100111001" source="9767" target="9574" cy:directed="1"/>
      <edge id="12644" label="1100110001 (1) 1100010001" source="9767" target="9721" cy:directed="1"/>
      <edge id="12643" label="1100110001 (1) 1101110001" source="9767" target="9722" cy:directed="1"/>
      <edge id="12642" label="1100110001 (1) 1000110001" source="9767" target="9774" cy:directed="1"/>
      <edge id="12641" label="0100100001 (1) 0100100101" source="9766" target="9765" cy:directed="1"/>
      <edge id="12640" label="0100100001 (1) 0100110001" source="9766" target="9764" cy:directed="1"/>
      <edge id="12639" label="0100100001 (1) 0100000001" source="9766" target="9887" cy:directed="1"/>
      <edge id="12638" label="0100100001 (1) 0101100001" source="9766" target="9810" cy:directed="1"/>
      <edge id="12637" label="0100100001 (1) 0000100001" source="9766" target="9781" cy:directed="1"/>
      <edge id="12636" label="0100100101 (1) 0100110101" source="9765" target="9573" cy:directed="1"/>
      <edge id="12635" label="0100100101 (1) 0101100101" source="9765" target="9716" cy:directed="1"/>
      <edge id="12634" label="0100100101 (1) 0110100101" source="9765" target="9741" cy:directed="1"/>
      <edge id="12633" label="0100100101 (1) 0000100101" source="9765" target="9780" cy:directed="1"/>
      <edge id="12632" label="0100110001 (1) 0100110101" source="9764" target="9573" cy:directed="1"/>
      <edge id="12631" label="0100110001 (1) 0100111001" source="9764" target="9572" cy:directed="1"/>
      <edge id="12630" label="0100110001 (1) 0100010001" source="9764" target="9714" cy:directed="1"/>
      <edge id="12629" label="0100110001 (1) 0101110001" source="9764" target="9715" cy:directed="1"/>
      <edge id="12628" label="0100110001 (1) 0000110001" source="9764" target="9779" cy:directed="1"/>
      <edge id="12627" label="1111001110 (1) 1111001010" source="9763" target="10048" cy:directed="1"/>
      <edge id="12626" label="1111001110 (1) 1111000110" source="9763" target="9987" cy:directed="1"/>
      <edge id="12625" label="1111001110 (1) 1111101110" source="9763" target="9363" cy:directed="1"/>
      <edge id="12624" label="1111001110 (1) 1110001110" source="9763" target="9822" cy:directed="1"/>
      <edge id="12623" label="1111101100 (1) 1111101000" source="9762" target="10047" cy:directed="1"/>
      <edge id="12622" label="1111101100 (1) 1111100100" source="9762" target="9986" cy:directed="1"/>
      <edge id="12621" label="1111101100 (1) 1111111100" source="9762" target="9817" cy:directed="1"/>
      <edge id="12620" label="1111101100 (1) 1110101100" source="9762" target="9747" cy:directed="1"/>
      <edge id="12619" label="0111001110 (1) 0111001010" source="9761" target="10039" cy:directed="1"/>
      <edge id="12618" label="0111001110 (1) 0111000110" source="9761" target="9985" cy:directed="1"/>
      <edge id="12617" label="0111001110 (1) 0111101110" source="9761" target="9362" cy:directed="1"/>
      <edge id="12616" label="0111001110 (1) 0110001110" source="9761" target="9826" cy:directed="1"/>
      <edge id="12615" label="0111001110 (1) 0011001110" source="9761" target="9769" cy:directed="1"/>
      <edge id="12614" label="0111101100 (1) 0111101000" source="9760" target="10038" cy:directed="1"/>
      <edge id="12613" label="0111101100 (1) 0111100100" source="9760" target="9984" cy:directed="1"/>
      <edge id="12612" label="0111101100 (1) 0111111100" source="9760" target="9816" cy:directed="1"/>
      <edge id="12611" label="0111101100 (1) 0110101100" source="9760" target="9745" cy:directed="1"/>
      <edge id="12610" label="0111101100 (1) 0011101100" source="9760" target="9692" cy:directed="1"/>
      <edge id="12609" label="0000101100 (1) 0000101000" source="9759" target="10035" cy:directed="1"/>
      <edge id="12608" label="0000101100 (1) 0000100100" source="9759" target="10058" cy:directed="1"/>
      <edge id="12607" label="0000101100 (1) 0000111100" source="9759" target="9928" cy:directed="1"/>
      <edge id="12606" label="0000101100 (1) 0000001100" source="9759" target="9866" cy:directed="1"/>
      <edge id="12605" label="0000101100 (1) 0001101100" source="9759" target="9758" cy:directed="1"/>
      <edge id="12604" label="0000101100 (1) 0010101100" source="9759" target="9757" cy:directed="1"/>
      <edge id="12603" label="0001101100 (1) 0001101000" source="9758" target="10034" cy:directed="1"/>
      <edge id="12602" label="0001101100 (1) 0001100100" source="9758" target="10009" cy:directed="1"/>
      <edge id="12601" label="0001101100 (1) 0001111100" source="9758" target="9849" cy:directed="1"/>
      <edge id="12600" label="0001101100 (1) 0001001100" source="9758" target="9864" cy:directed="1"/>
      <edge id="12599" label="0001101100 (1) 0011101100" source="9758" target="9692" cy:directed="1"/>
      <edge id="12598" label="0010101100 (1) 0010101000" source="9757" target="10033" cy:directed="1"/>
      <edge id="12597" label="0010101100 (1) 0010100100" source="9757" target="10025" cy:directed="1"/>
      <edge id="12596" label="0010101100 (1) 0010111100" source="9757" target="9904" cy:directed="1"/>
      <edge id="12595" label="0010101100 (1) 0010001100" source="9757" target="9863" cy:directed="1"/>
      <edge id="12594" label="1000101100 (1) 1000101000" source="9756" target="10032" cy:directed="1"/>
      <edge id="12593" label="1000101100 (1) 1000100100" source="9756" target="10067" cy:directed="1"/>
      <edge id="12592" label="1000101100 (1) 1000111100" source="9756" target="9929" cy:directed="1"/>
      <edge id="12591" label="1000101100 (1) 1000001100" source="9756" target="9871" cy:directed="1"/>
      <edge id="12590" label="1000101100 (1) 1001101100" source="9756" target="9755" cy:directed="1"/>
      <edge id="12589" label="1000101100 (1) 1010101100" source="9756" target="9754" cy:directed="1"/>
      <edge id="12588" label="1000101100 (1) 1100101100" source="9756" target="9753" cy:directed="1"/>
      <edge id="12587" label="1001101100 (1) 1001101000" source="9755" target="10031" cy:directed="1"/>
      <edge id="12586" label="1001101100 (1) 1001100100" source="9755" target="10012" cy:directed="1"/>
      <edge id="12585" label="1001101100 (1) 1001111100" source="9755" target="9853" cy:directed="1"/>
      <edge id="12584" label="1001101100 (1) 1001001100" source="9755" target="9869" cy:directed="1"/>
      <edge id="12583" label="1001101100 (1) 1011101100" source="9755" target="9706" cy:directed="1"/>
      <edge id="12582" label="1001101100 (1) 1101101100" source="9755" target="9793" cy:directed="1"/>
      <edge id="12581" label="1010101100 (1) 1010101000" source="9754" target="10030" cy:directed="1"/>
      <edge id="12580" label="1010101100 (1) 1010100100" source="9754" target="10027" cy:directed="1"/>
      <edge id="12579" label="1010101100 (1) 1010111100" source="9754" target="9906" cy:directed="1"/>
      <edge id="12578" label="1010101100 (1) 1010001100" source="9754" target="9868" cy:directed="1"/>
      <edge id="12577" label="1010101100 (1) 1110101100" source="9754" target="9747" cy:directed="1"/>
      <edge id="12576" label="1100101100 (1) 1100101000" source="9753" target="10029" cy:directed="1"/>
      <edge id="12575" label="1100101100 (1) 1100100100" source="9753" target="10051" cy:directed="1"/>
      <edge id="12574" label="1100101100 (1) 1100111100" source="9753" target="9926" cy:directed="1"/>
      <edge id="12573" label="1100101100 (1) 1100001100" source="9753" target="9867" cy:directed="1"/>
      <edge id="12572" label="1100101100 (1) 1101101100" source="9753" target="9793" cy:directed="1"/>
      <edge id="12571" label="1100101100 (1) 1110101100" source="9753" target="9747" cy:directed="1"/>
      <edge id="12570" label="0010100101 (1) 0010110101" source="9752" target="9564" cy:directed="1"/>
      <edge id="12569" label="0010110001 (1) 0010110101" source="9751" target="9564" cy:directed="1"/>
      <edge id="12568" label="0010110001 (1) 0010111001" source="9751" target="9563" cy:directed="1"/>
      <edge id="12567" label="0010110001 (1) 0010010001" source="9751" target="9702" cy:directed="1"/>
      <edge id="12566" label="1010100101 (1) 1010110101" source="9750" target="9557" cy:directed="1"/>
      <edge id="12565" label="1010100101 (1) 1110100101" source="9750" target="9744" cy:directed="1"/>
      <edge id="12564" label="1010110001 (1) 1010110101" source="9749" target="9557" cy:directed="1"/>
      <edge id="12563" label="1010110001 (1) 1010111001" source="9749" target="9556" cy:directed="1"/>
      <edge id="12562" label="1010110001 (1) 1010010001" source="9749" target="9696" cy:directed="1"/>
      <edge id="12561" label="1110100001 (1) 1110100101" source="9748" target="9744" cy:directed="1"/>
      <edge id="12560" label="1110100001 (1) 1110110001" source="9748" target="9743" cy:directed="1"/>
      <edge id="12559" label="1110100001 (1) 1110000001" source="9748" target="9857" cy:directed="1"/>
      <edge id="12558" label="1110100001 (1) 1100100001" source="9748" target="9771" cy:directed="1"/>
      <edge id="12557" label="1110101100 (1) 1110101000" source="9747" target="10015" cy:directed="1"/>
      <edge id="12556" label="1110101100 (1) 1110100100" source="9747" target="10021" cy:directed="1"/>
      <edge id="12555" label="1110101100 (1) 1110111100" source="9747" target="9892" cy:directed="1"/>
      <edge id="12554" label="1110101100 (1) 1110001100" source="9747" target="9850" cy:directed="1"/>
      <edge id="12553" label="0100101100 (1) 0100101000" source="9746" target="10024" cy:directed="1"/>
      <edge id="12552" label="0100101100 (1) 0100100100" source="9746" target="10043" cy:directed="1"/>
      <edge id="12551" label="0100101100 (1) 0100111100" source="9746" target="9923" cy:directed="1"/>
      <edge id="12550" label="0100101100 (1) 0100001100" source="9746" target="9848" cy:directed="1"/>
      <edge id="12549" label="0100101100 (1) 0101101100" source="9746" target="9790" cy:directed="1"/>
      <edge id="12548" label="0100101100 (1) 0110101100" source="9746" target="9745" cy:directed="1"/>
      <edge id="12547" label="0100101100 (1) 0000101100" source="9746" target="9759" cy:directed="1"/>
      <edge id="12546" label="0110101100 (1) 0110101000" source="9745" target="10014" cy:directed="1"/>
      <edge id="12545" label="0110101100 (1) 0110100100" source="9745" target="10018" cy:directed="1"/>
      <edge id="12544" label="0110101100 (1) 0110111100" source="9745" target="9891" cy:directed="1"/>
      <edge id="12543" label="0110101100 (1) 0110001100" source="9745" target="9845" cy:directed="1"/>
      <edge id="12542" label="0110101100 (1) 0010101100" source="9745" target="9757" cy:directed="1"/>
      <edge id="12541" label="1110100101 (1) 1110110101" source="9744" target="9548" cy:directed="1"/>
      <edge id="12540" label="1110110001 (1) 1110110101" source="9743" target="9548" cy:directed="1"/>
      <edge id="12539" label="1110110001 (1) 1110111001" source="9743" target="9547" cy:directed="1"/>
      <edge id="12538" label="1110110001 (1) 1110010001" source="9743" target="9687" cy:directed="1"/>
      <edge id="12537" label="1110110001 (1) 1100110001" source="9743" target="9767" cy:directed="1"/>
      <edge id="12536" label="1110110001 (1) 1010110001" source="9743" target="9749" cy:directed="1"/>
      <edge id="12535" label="0110100001 (1) 0110100101" source="9742" target="9741" cy:directed="1"/>
      <edge id="12534" label="0110100001 (1) 0110110001" source="9742" target="9740" cy:directed="1"/>
      <edge id="12533" label="0110100001 (1) 0110000001" source="9742" target="9842" cy:directed="1"/>
      <edge id="12532" label="0110100001 (1) 0100100001" source="9742" target="9766" cy:directed="1"/>
      <edge id="12531" label="0110100001 (1) 0010100001" source="9742" target="9777" cy:directed="1"/>
      <edge id="12530" label="0110100101 (1) 0110110101" source="9741" target="9543" cy:directed="1"/>
      <edge id="12529" label="0110100101 (1) 0010100101" source="9741" target="9752" cy:directed="1"/>
      <edge id="12528" label="0110110001 (1) 0110110101" source="9740" target="9543" cy:directed="1"/>
      <edge id="12527" label="0110110001 (1) 0110111001" source="9740" target="9542" cy:directed="1"/>
      <edge id="12526" label="0110110001 (1) 0110010001" source="9740" target="9681" cy:directed="1"/>
      <edge id="12525" label="0110110001 (1) 0100110001" source="9740" target="9764" cy:directed="1"/>
      <edge id="12524" label="0110110001 (1) 0010110001" source="9740" target="9751" cy:directed="1"/>
      <edge id="12523" label="1000010001 (1) 1000010011" source="9739" target="9738" cy:directed="1"/>
      <edge id="12522" label="1000010001 (1) 1000010101" source="9739" target="9737" cy:directed="1"/>
      <edge id="12521" label="1000010001 (1) 1000011001" source="9739" target="9736" cy:directed="1"/>
      <edge id="12520" label="1000010001 (1) 1000000001" source="9739" target="9897" cy:directed="1"/>
      <edge id="12519" label="1000010001 (1) 1001010001" source="9739" target="9735" cy:directed="1"/>
      <edge id="12518" label="1000010011 (1) 1000010111" source="9738" target="9406" cy:directed="1"/>
      <edge id="12517" label="1000010011 (1) 1000000011" source="9738" target="9896" cy:directed="1"/>
      <edge id="12516" label="1000010011 (1) 1001010011" source="9738" target="9667" cy:directed="1"/>
      <edge id="12515" label="1000010101 (1) 1000010111" source="9737" target="9406" cy:directed="1"/>
      <edge id="12514" label="1000010101 (1) 1000011101" source="9737" target="9458" cy:directed="1"/>
      <edge id="12513" label="1000010101 (1) 1000000101" source="9737" target="9895" cy:directed="1"/>
      <edge id="12512" label="1000010101 (1) 1000110101" source="9737" target="9586" cy:directed="1"/>
      <edge id="12511" label="1000010101 (1) 1001010101" source="9737" target="9666" cy:directed="1"/>
      <edge id="12510" label="1000010101 (1) 1010010101" source="9737" target="9694" cy:directed="1"/>
      <edge id="12509" label="1000011001 (1) 1000011011" source="9736" target="9459" cy:directed="1"/>
      <edge id="12508" label="1000011001 (1) 1000011101" source="9736" target="9458" cy:directed="1"/>
      <edge id="12507" label="1000011001 (1) 1000001001" source="9736" target="9641" cy:directed="1"/>
      <edge id="12506" label="1000011001 (1) 1001011001" source="9736" target="9665" cy:directed="1"/>
      <edge id="12505" label="1001010001 (1) 1001010011" source="9735" target="9667" cy:directed="1"/>
      <edge id="12504" label="1001010001 (1) 1001010101" source="9735" target="9666" cy:directed="1"/>
      <edge id="12503" label="1001010001 (1) 1001011001" source="9735" target="9665" cy:directed="1"/>
      <edge id="12502" label="1001010001 (1) 1001000001" source="9735" target="9894" cy:directed="1"/>
      <edge id="12501" label="0000010001 (1) 0000010011" source="9734" target="9733" cy:directed="1"/>
      <edge id="12500" label="0000010001 (1) 0000010101" source="9734" target="9732" cy:directed="1"/>
      <edge id="12499" label="0000010001 (1) 0000011001" source="9734" target="9731" cy:directed="1"/>
      <edge id="12498" label="0000010001 (1) 0000000001" source="9734" target="9901" cy:directed="1"/>
      <edge id="12497" label="0000010001 (1) 0001010001" source="9734" target="9730" cy:directed="1"/>
      <edge id="12496" label="0000010011 (1) 0000010111" source="9733" target="9401" cy:directed="1"/>
      <edge id="12495" label="0000010011 (1) 0000000011" source="9733" target="9900" cy:directed="1"/>
      <edge id="12494" label="0000010011 (1) 0001010011" source="9733" target="9664" cy:directed="1"/>
      <edge id="12493" label="0000010101 (1) 0000010111" source="9732" target="9401" cy:directed="1"/>
      <edge id="12492" label="0000010101 (1) 0000011101" source="9732" target="9456" cy:directed="1"/>
      <edge id="12491" label="0000010101 (1) 0000000101" source="9732" target="9899" cy:directed="1"/>
      <edge id="12490" label="0000010101 (1) 0000110101" source="9732" target="9581" cy:directed="1"/>
      <edge id="12489" label="0000010101 (1) 0001010101" source="9732" target="9663" cy:directed="1"/>
      <edge id="12488" label="0000010101 (1) 0010010101" source="9732" target="9700" cy:directed="1"/>
      <edge id="12487" label="0000011001 (1) 0000011011" source="9731" target="9457" cy:directed="1"/>
      <edge id="12486" label="0000011001 (1) 0000011101" source="9731" target="9456" cy:directed="1"/>
      <edge id="12485" label="0000011001 (1) 0000001001" source="9731" target="9636" cy:directed="1"/>
      <edge id="12484" label="0000011001 (1) 0001011001" source="9731" target="9662" cy:directed="1"/>
      <edge id="12483" label="0001010001 (1) 0001010011" source="9730" target="9664" cy:directed="1"/>
      <edge id="12482" label="0001010001 (1) 0001010101" source="9730" target="9663" cy:directed="1"/>
      <edge id="12481" label="0001010001 (1) 0001011001" source="9730" target="9662" cy:directed="1"/>
      <edge id="12480" label="0001010001 (1) 0001000001" source="9730" target="9898" cy:directed="1"/>
      <edge id="12479" label="0001100101 (1) 0001110101" source="9729" target="9517" cy:directed="1"/>
      <edge id="12478" label="0001100101 (1) 0011100101" source="9729" target="9705" cy:directed="1"/>
      <edge id="12477" label="0001110001 (1) 0001110101" source="9728" target="9517" cy:directed="1"/>
      <edge id="12476" label="0001110001 (1) 0001111001" source="9728" target="9516" cy:directed="1"/>
      <edge id="12475" label="0001110001 (1) 0001010001" source="9728" target="9730" cy:directed="1"/>
      <edge id="12474" label="0001110001 (1) 0011110001" source="9728" target="9704" cy:directed="1"/>
      <edge id="12473" label="0011100001 (1) 0011100101" source="9727" target="9705" cy:directed="1"/>
      <edge id="12472" label="0011100001 (1) 0011110001" source="9727" target="9704" cy:directed="1"/>
      <edge id="12471" label="0011100001 (1) 0011000001" source="9727" target="9804" cy:directed="1"/>
      <edge id="12470" label="0011100001 (1) 0010100001" source="9727" target="9777" cy:directed="1"/>
      <edge id="12469" label="1001100101 (1) 1001110101" source="9726" target="9523" cy:directed="1"/>
      <edge id="12468" label="1001100101 (1) 1011100101" source="9726" target="9698" cy:directed="1"/>
      <edge id="12467" label="1001100101 (1) 1101100101" source="9726" target="9723" cy:directed="1"/>
      <edge id="12466" label="1001110001 (1) 1001110101" source="9725" target="9523" cy:directed="1"/>
      <edge id="12465" label="1001110001 (1) 1001111001" source="9725" target="9522" cy:directed="1"/>
      <edge id="12464" label="1001110001 (1) 1001010001" source="9725" target="9735" cy:directed="1"/>
      <edge id="12463" label="1001110001 (1) 1011110001" source="9725" target="9697" cy:directed="1"/>
      <edge id="12462" label="1011100001 (1) 1011100101" source="9724" target="9698" cy:directed="1"/>
      <edge id="12461" label="1011100001 (1) 1011110001" source="9724" target="9697" cy:directed="1"/>
      <edge id="12460" label="1011100001 (1) 1011000001" source="9724" target="9798" cy:directed="1"/>
      <edge id="12459" label="1011100001 (1) 1010100001" source="9724" target="9772" cy:directed="1"/>
      <edge id="12458" label="1011100001 (1) 1111100001" source="9724" target="9786" cy:directed="1"/>
      <edge id="12457" label="1101100101 (1) 1101110101" source="9723" target="9511" cy:directed="1"/>
      <edge id="12456" label="1101100101 (1) 1111100101" source="9723" target="9689" cy:directed="1"/>
      <edge id="12455" label="1101110001 (1) 1101110101" source="9722" target="9511" cy:directed="1"/>
      <edge id="12454" label="1101110001 (1) 1101111001" source="9722" target="9510" cy:directed="1"/>
      <edge id="12453" label="1101110001 (1) 1001110001" source="9722" target="9725" cy:directed="1"/>
      <edge id="12452" label="1100010001 (1) 1100010011" source="9721" target="9720" cy:directed="1"/>
      <edge id="12451" label="1100010001 (1) 1100010101" source="9721" target="9719" cy:directed="1"/>
      <edge id="12450" label="1100010001 (1) 1100011001" source="9721" target="9718" cy:directed="1"/>
      <edge id="12449" label="1100010001 (1) 1100000001" source="9721" target="9893" cy:directed="1"/>
      <edge id="12448" label="1100010001 (1) 1101010001" source="9721" target="9717" cy:directed="1"/>
      <edge id="12447" label="1100010001 (1) 1000010001" source="9721" target="9739" cy:directed="1"/>
      <edge id="12446" label="1100010011 (1) 1100010111" source="9720" target="9399" cy:directed="1"/>
      <edge id="12445" label="1100010011 (1) 1100000011" source="9720" target="9890" cy:directed="1"/>
      <edge id="12444" label="1100010011 (1) 1101010011" source="9720" target="9652" cy:directed="1"/>
      <edge id="12443" label="1100010011 (1) 1000010011" source="9720" target="9738" cy:directed="1"/>
      <edge id="12442" label="1100010101 (1) 1100010111" source="9719" target="9399" cy:directed="1"/>
      <edge id="12441" label="1100010101 (1) 1100011101" source="9719" target="9443" cy:directed="1"/>
      <edge id="12440" label="1100010101 (1) 1100000101" source="9719" target="9889" cy:directed="1"/>
      <edge id="12439" label="1100010101 (1) 1100110101" source="9719" target="9575" cy:directed="1"/>
      <edge id="12438" label="1100010101 (1) 1101010101" source="9719" target="9651" cy:directed="1"/>
      <edge id="12437" label="1100010101 (1) 1110010101" source="9719" target="9685" cy:directed="1"/>
      <edge id="12436" label="1100010101 (1) 1000010101" source="9719" target="9737" cy:directed="1"/>
      <edge id="12435" label="1100011001 (1) 1100011011" source="9718" target="9444" cy:directed="1"/>
      <edge id="12434" label="1100011001 (1) 1100011101" source="9718" target="9443" cy:directed="1"/>
      <edge id="12433" label="1100011001 (1) 1100001001" source="9718" target="9637" cy:directed="1"/>
      <edge id="12432" label="1100011001 (1) 1101011001" source="9718" target="9650" cy:directed="1"/>
      <edge id="12431" label="1100011001 (1) 1000011001" source="9718" target="9736" cy:directed="1"/>
      <edge id="12430" label="1101010001 (1) 1101010011" source="9717" target="9652" cy:directed="1"/>
      <edge id="12429" label="1101010001 (1) 1101010101" source="9717" target="9651" cy:directed="1"/>
      <edge id="12428" label="1101010001 (1) 1101011001" source="9717" target="9650" cy:directed="1"/>
      <edge id="12427" label="1101010001 (1) 1101000001" source="9717" target="9888" cy:directed="1"/>
      <edge id="12426" label="1101010001 (1) 1101110001" source="9717" target="9722" cy:directed="1"/>
      <edge id="12425" label="1101010001 (1) 1001010001" source="9717" target="9735" cy:directed="1"/>
      <edge id="12424" label="0101100101 (1) 0101110101" source="9716" target="9509" cy:directed="1"/>
      <edge id="12423" label="0101100101 (1) 0111100101" source="9716" target="9683" cy:directed="1"/>
      <edge id="12422" label="0101100101 (1) 0001100101" source="9716" target="9729" cy:directed="1"/>
      <edge id="12421" label="0101110001 (1) 0101110101" source="9715" target="9509" cy:directed="1"/>
      <edge id="12420" label="0101110001 (1) 0101111001" source="9715" target="9508" cy:directed="1"/>
      <edge id="12419" label="0101110001 (1) 0001110001" source="9715" target="9728" cy:directed="1"/>
      <edge id="12418" label="0100010001 (1) 0100010011" source="9714" target="9713" cy:directed="1"/>
      <edge id="12417" label="0100010001 (1) 0100010101" source="9714" target="9712" cy:directed="1"/>
      <edge id="12416" label="0100010001 (1) 0100011001" source="9714" target="9711" cy:directed="1"/>
      <edge id="12415" label="0100010001 (1) 0100000001" source="9714" target="9887" cy:directed="1"/>
      <edge id="12414" label="0100010001 (1) 0101010001" source="9714" target="9710" cy:directed="1"/>
      <edge id="12413" label="0100010001 (1) 0000010001" source="9714" target="9734" cy:directed="1"/>
      <edge id="12412" label="0100010011 (1) 0100010111" source="9713" target="9398" cy:directed="1"/>
      <edge id="12411" label="0100010011 (1) 0100000011" source="9713" target="9886" cy:directed="1"/>
      <edge id="12410" label="0100010011 (1) 0101010011" source="9713" target="9649" cy:directed="1"/>
      <edge id="12409" label="0100010011 (1) 0000010011" source="9713" target="9733" cy:directed="1"/>
      <edge id="12408" label="0100010101 (1) 0100010111" source="9712" target="9398" cy:directed="1"/>
      <edge id="12407" label="0100010101 (1) 0100011101" source="9712" target="9448" cy:directed="1"/>
      <edge id="12406" label="0100010101 (1) 0100000101" source="9712" target="9885" cy:directed="1"/>
      <edge id="12405" label="0100010101 (1) 0100110101" source="9712" target="9573" cy:directed="1"/>
      <edge id="12404" label="0100010101 (1) 0101010101" source="9712" target="9648" cy:directed="1"/>
      <edge id="12403" label="0100010101 (1) 0110010101" source="9712" target="9679" cy:directed="1"/>
      <edge id="12402" label="0100010101 (1) 0000010101" source="9712" target="9732" cy:directed="1"/>
      <edge id="12401" label="0100011001 (1) 0100011011" source="9711" target="9449" cy:directed="1"/>
      <edge id="12400" label="0100011001 (1) 0100011101" source="9711" target="9448" cy:directed="1"/>
      <edge id="12399" label="0100011001 (1) 0100001001" source="9711" target="9627" cy:directed="1"/>
      <edge id="12398" label="0100011001 (1) 0101011001" source="9711" target="9647" cy:directed="1"/>
      <edge id="12397" label="0100011001 (1) 0000011001" source="9711" target="9731" cy:directed="1"/>
      <edge id="12396" label="0101010001 (1) 0101010011" source="9710" target="9649" cy:directed="1"/>
      <edge id="12395" label="0101010001 (1) 0101010101" source="9710" target="9648" cy:directed="1"/>
      <edge id="12394" label="0101010001 (1) 0101011001" source="9710" target="9647" cy:directed="1"/>
      <edge id="12393" label="0101010001 (1) 0101000001" source="9710" target="9884" cy:directed="1"/>
      <edge id="12392" label="0101010001 (1) 0101110001" source="9710" target="9715" cy:directed="1"/>
      <edge id="12391" label="0101010001 (1) 0001010001" source="9710" target="9730" cy:directed="1"/>
      <edge id="12390" label="0000011110 (1) 0000010110" source="9709" target="9950" cy:directed="1"/>
      <edge id="12389" label="0000011110 (1) 0000001110" source="9709" target="9865" cy:directed="1"/>
      <edge id="12388" label="0000011110 (1) 0001011110" source="9709" target="9622" cy:directed="1"/>
      <edge id="12387" label="0000011110 (1) 0010011110" source="9709" target="9672" cy:directed="1"/>
      <edge id="12386" label="1101101010 (1) 1101101000" source="9708" target="10073" cy:directed="1"/>
      <edge id="12385" label="1101101010 (1) 1101100010" source="9708" target="9959" cy:directed="1"/>
      <edge id="12384" label="1101101010 (1) 1101111010" source="9708" target="9565" cy:directed="1"/>
      <edge id="12383" label="1000011110 (1) 1000010110" source="9707" target="9946" cy:directed="1"/>
      <edge id="12382" label="1000011110 (1) 1000001110" source="9707" target="9870" cy:directed="1"/>
      <edge id="12381" label="1000011110 (1) 1001011110" source="9707" target="9623" cy:directed="1"/>
      <edge id="12380" label="1000011110 (1) 1010011110" source="9707" target="9675" cy:directed="1"/>
      <edge id="12379" label="1011101100 (1) 1011101000" source="9706" target="9996" cy:directed="1"/>
      <edge id="12378" label="1011101100 (1) 1011100100" source="9706" target="9992" cy:directed="1"/>
      <edge id="12377" label="1011101100 (1) 1011111100" source="9706" target="9823" cy:directed="1"/>
      <edge id="12376" label="1011101100 (1) 1011001100" source="9706" target="9805" cy:directed="1"/>
      <edge id="12375" label="1011101100 (1) 1010101100" source="9706" target="9754" cy:directed="1"/>
      <edge id="12374" label="1011101100 (1) 1111101100" source="9706" target="9762" cy:directed="1"/>
      <edge id="12373" label="0011100101 (1) 0011110101" source="9705" target="9485" cy:directed="1"/>
      <edge id="12372" label="0011100101 (1) 0010100101" source="9705" target="9752" cy:directed="1"/>
      <edge id="12371" label="0011110001 (1) 0011110101" source="9704" target="9485" cy:directed="1"/>
      <edge id="12370" label="0011110001 (1) 0011111001" source="9704" target="9484" cy:directed="1"/>
      <edge id="12369" label="0011110001 (1) 0011010001" source="9704" target="9617" cy:directed="1"/>
      <edge id="12368" label="0011110001 (1) 0010110001" source="9704" target="9751" cy:directed="1"/>
      <edge id="12367" label="0101101010 (1) 0101101000" source="9703" target="10070" cy:directed="1"/>
      <edge id="12366" label="0101101010 (1) 0101100010" source="9703" target="9955" cy:directed="1"/>
      <edge id="12365" label="0101101010 (1) 0101111010" source="9703" target="9554" cy:directed="1"/>
      <edge id="12364" label="0101101010 (1) 0001101010" source="9703" target="9659" cy:directed="1"/>
      <edge id="12363" label="0010010001 (1) 0010010011" source="9702" target="9701" cy:directed="1"/>
      <edge id="12362" label="0010010001 (1) 0010010101" source="9702" target="9700" cy:directed="1"/>
      <edge id="12361" label="0010010001 (1) 0010011001" source="9702" target="9699" cy:directed="1"/>
      <edge id="12360" label="0010010001 (1) 0010000001" source="9702" target="9856" cy:directed="1"/>
      <edge id="12359" label="0010010001 (1) 0000010001" source="9702" target="9734" cy:directed="1"/>
      <edge id="12358" label="0010010011 (1) 0010010111" source="9701" target="9391" cy:directed="1"/>
      <edge id="12357" label="0010010011 (1) 0010000011" source="9701" target="9855" cy:directed="1"/>
      <edge id="12356" label="0010010011 (1) 0000010011" source="9701" target="9733" cy:directed="1"/>
      <edge id="12355" label="0010010101 (1) 0010010111" source="9700" target="9391" cy:directed="1"/>
      <edge id="12354" label="0010010101 (1) 0010011101" source="9700" target="9430" cy:directed="1"/>
      <edge id="12353" label="0010010101 (1) 0010000101" source="9700" target="9854" cy:directed="1"/>
      <edge id="12352" label="0010010101 (1) 0010110101" source="9700" target="9564" cy:directed="1"/>
      <edge id="12351" label="0010011001 (1) 0010011011" source="9699" target="9431" cy:directed="1"/>
      <edge id="12350" label="0010011001 (1) 0010011101" source="9699" target="9430" cy:directed="1"/>
      <edge id="12349" label="0010011001 (1) 0010001001" source="9699" target="9593" cy:directed="1"/>
      <edge id="12348" label="0010011001 (1) 0000011001" source="9699" target="9731" cy:directed="1"/>
      <edge id="12347" label="1011100101 (1) 1011110101" source="9698" target="9488" cy:directed="1"/>
      <edge id="12346" label="1011100101 (1) 1010100101" source="9698" target="9750" cy:directed="1"/>
      <edge id="12345" label="1011100101 (1) 1111100101" source="9698" target="9689" cy:directed="1"/>
      <edge id="12344" label="1011110001 (1) 1011110101" source="9697" target="9488" cy:directed="1"/>
      <edge id="12343" label="1011110001 (1) 1011111001" source="9697" target="9487" cy:directed="1"/>
      <edge id="12342" label="1011110001 (1) 1011010001" source="9697" target="9621" cy:directed="1"/>
      <edge id="12341" label="1011110001 (1) 1010110001" source="9697" target="9749" cy:directed="1"/>
      <edge id="12340" label="1010010001 (1) 1010010011" source="9696" target="9695" cy:directed="1"/>
      <edge id="12339" label="1010010001 (1) 1010010101" source="9696" target="9694" cy:directed="1"/>
      <edge id="12338" label="1010010001 (1) 1010011001" source="9696" target="9693" cy:directed="1"/>
      <edge id="12337" label="1010010001 (1) 1010000001" source="9696" target="9860" cy:directed="1"/>
      <edge id="12336" label="1010010001 (1) 1000010001" source="9696" target="9739" cy:directed="1"/>
      <edge id="12335" label="1010010011 (1) 1010010111" source="9695" target="9385" cy:directed="1"/>
      <edge id="12334" label="1010010011 (1) 1010000011" source="9695" target="9859" cy:directed="1"/>
      <edge id="12333" label="1010010011 (1) 1000010011" source="9695" target="9738" cy:directed="1"/>
      <edge id="12332" label="1010010101 (1) 1010010111" source="9694" target="9385" cy:directed="1"/>
      <edge id="12331" label="1010010101 (1) 1010011101" source="9694" target="9434" cy:directed="1"/>
      <edge id="12330" label="1010010101 (1) 1010000101" source="9694" target="9858" cy:directed="1"/>
      <edge id="12329" label="1010010101 (1) 1010110101" source="9694" target="9557" cy:directed="1"/>
      <edge id="12328" label="1010011001 (1) 1010011011" source="9693" target="9435" cy:directed="1"/>
      <edge id="12327" label="1010011001 (1) 1010011101" source="9693" target="9434" cy:directed="1"/>
      <edge id="12326" label="1010011001 (1) 1010001001" source="9693" target="9597" cy:directed="1"/>
      <edge id="12325" label="1010011001 (1) 1000011001" source="9693" target="9736" cy:directed="1"/>
      <edge id="12324" label="0011101100 (1) 0011101000" source="9692" target="9997" cy:directed="1"/>
      <edge id="12323" label="0011101100 (1) 0011100100" source="9692" target="9990" cy:directed="1"/>
      <edge id="12322" label="0011101100 (1) 0011111100" source="9692" target="9821" cy:directed="1"/>
      <edge id="12321" label="0011101100 (1) 0011001100" source="9692" target="9800" cy:directed="1"/>
      <edge id="12320" label="0011101100 (1) 0010101100" source="9692" target="9757" cy:directed="1"/>
      <edge id="12319" label="1100011110 (1) 1100010110" source="9691" target="9932" cy:directed="1"/>
      <edge id="12318" label="1100011110 (1) 1100001110" source="9691" target="9852" cy:directed="1"/>
      <edge id="12317" label="1100011110 (1) 1101011110" source="9691" target="9613" cy:directed="1"/>
      <edge id="12316" label="1100011110 (1) 1110011110" source="9691" target="9669" cy:directed="1"/>
      <edge id="12315" label="1100011110 (1) 1000011110" source="9691" target="9707" cy:directed="1"/>
      <edge id="12314" label="0100011110 (1) 0100010110" source="9690" target="9936" cy:directed="1"/>
      <edge id="12313" label="0100011110 (1) 0100001110" source="9690" target="9847" cy:directed="1"/>
      <edge id="12312" label="0100011110 (1) 0101011110" source="9690" target="9611" cy:directed="1"/>
      <edge id="12311" label="0100011110 (1) 0110011110" source="9690" target="9668" cy:directed="1"/>
      <edge id="12310" label="0100011110 (1) 0000011110" source="9690" target="9709" cy:directed="1"/>
      <edge id="12309" label="1111100101 (1) 1111110101" source="9689" target="9483" cy:directed="1"/>
      <edge id="12308" label="1111100101 (1) 1110100101" source="9689" target="9744" cy:directed="1"/>
      <edge id="12307" label="1111110001 (1) 1111110101" source="9688" target="9483" cy:directed="1"/>
      <edge id="12306" label="1111110001 (1) 1111111001" source="9688" target="9482" cy:directed="1"/>
      <edge id="12305" label="1111110001 (1) 1110110001" source="9688" target="9743" cy:directed="1"/>
      <edge id="12304" label="1111110001 (1) 1101110001" source="9688" target="9722" cy:directed="1"/>
      <edge id="12303" label="1111110001 (1) 1011110001" source="9688" target="9697" cy:directed="1"/>
      <edge id="12302" label="1110010001 (1) 1110010011" source="9687" target="9686" cy:directed="1"/>
      <edge id="12301" label="1110010001 (1) 1110010101" source="9687" target="9685" cy:directed="1"/>
      <edge id="12300" label="1110010001 (1) 1110011001" source="9687" target="9684" cy:directed="1"/>
      <edge id="12299" label="1110010001 (1) 1110000001" source="9687" target="9857" cy:directed="1"/>
      <edge id="12298" label="1110010001 (1) 1100010001" source="9687" target="9721" cy:directed="1"/>
      <edge id="12297" label="1110010001 (1) 1010010001" source="9687" target="9696" cy:directed="1"/>
      <edge id="12296" label="1110010011 (1) 1110010111" source="9686" target="9383" cy:directed="1"/>
      <edge id="12295" label="1110010011 (1) 1110000011" source="9686" target="9844" cy:directed="1"/>
      <edge id="12294" label="1110010011 (1) 1100010011" source="9686" target="9720" cy:directed="1"/>
      <edge id="12293" label="1110010011 (1) 1010010011" source="9686" target="9695" cy:directed="1"/>
      <edge id="12292" label="1110010101 (1) 1110010111" source="9685" target="9383" cy:directed="1"/>
      <edge id="12291" label="1110010101 (1) 1110011101" source="9685" target="9428" cy:directed="1"/>
      <edge id="12290" label="1110010101 (1) 1110000101" source="9685" target="9843" cy:directed="1"/>
      <edge id="12289" label="1110010101 (1) 1110110101" source="9685" target="9548" cy:directed="1"/>
      <edge id="12288" label="1110010101 (1) 1010010101" source="9685" target="9694" cy:directed="1"/>
      <edge id="12287" label="1110011001 (1) 1110011011" source="9684" target="9429" cy:directed="1"/>
      <edge id="12286" label="1110011001 (1) 1110011101" source="9684" target="9428" cy:directed="1"/>
      <edge id="12285" label="1110011001 (1) 1110001001" source="9684" target="9594" cy:directed="1"/>
      <edge id="12284" label="1110011001 (1) 1100011001" source="9684" target="9718" cy:directed="1"/>
      <edge id="12283" label="1110011001 (1) 1010011001" source="9684" target="9693" cy:directed="1"/>
      <edge id="12282" label="0111100101 (1) 0111110101" source="9683" target="9481" cy:directed="1"/>
      <edge id="12281" label="0111100101 (1) 0110100101" source="9683" target="9741" cy:directed="1"/>
      <edge id="12280" label="0111100101 (1) 0011100101" source="9683" target="9705" cy:directed="1"/>
      <edge id="12279" label="0111110001 (1) 0111110101" source="9682" target="9481" cy:directed="1"/>
      <edge id="12278" label="0111110001 (1) 0111111001" source="9682" target="9480" cy:directed="1"/>
      <edge id="12277" label="0111110001 (1) 0110110001" source="9682" target="9740" cy:directed="1"/>
      <edge id="12276" label="0111110001 (1) 0101110001" source="9682" target="9715" cy:directed="1"/>
      <edge id="12275" label="0111110001 (1) 0011110001" source="9682" target="9704" cy:directed="1"/>
      <edge id="12274" label="0110010001 (1) 0110010011" source="9681" target="9680" cy:directed="1"/>
      <edge id="12273" label="0110010001 (1) 0110010101" source="9681" target="9679" cy:directed="1"/>
      <edge id="12272" label="0110010001 (1) 0110011001" source="9681" target="9678" cy:directed="1"/>
      <edge id="12271" label="0110010001 (1) 0110000001" source="9681" target="9842" cy:directed="1"/>
      <edge id="12270" label="0110010001 (1) 0100010001" source="9681" target="9714" cy:directed="1"/>
      <edge id="12269" label="0110010001 (1) 0010010001" source="9681" target="9702" cy:directed="1"/>
      <edge id="12268" label="0110010011 (1) 0110010111" source="9680" target="9382" cy:directed="1"/>
      <edge id="12267" label="0110010011 (1) 0110000011" source="9680" target="9841" cy:directed="1"/>
      <edge id="12266" label="0110010011 (1) 0100010011" source="9680" target="9713" cy:directed="1"/>
      <edge id="12265" label="0110010011 (1) 0010010011" source="9680" target="9701" cy:directed="1"/>
      <edge id="12264" label="0110010101 (1) 0110010111" source="9679" target="9382" cy:directed="1"/>
      <edge id="12263" label="0110010101 (1) 0110011101" source="9679" target="9425" cy:directed="1"/>
      <edge id="12262" label="0110010101 (1) 0110000101" source="9679" target="9840" cy:directed="1"/>
      <edge id="12261" label="0110010101 (1) 0110110101" source="9679" target="9543" cy:directed="1"/>
      <edge id="12260" label="0110010101 (1) 0010010101" source="9679" target="9700" cy:directed="1"/>
      <edge id="12259" label="0110011001 (1) 0110011011" source="9678" target="9426" cy:directed="1"/>
      <edge id="12258" label="0110011001 (1) 0110011101" source="9678" target="9425" cy:directed="1"/>
      <edge id="12257" label="0110011001 (1) 0110001001" source="9678" target="9584" cy:directed="1"/>
      <edge id="12256" label="0110011001 (1) 0100011001" source="9678" target="9711" cy:directed="1"/>
      <edge id="12255" label="0110011001 (1) 0010011001" source="9678" target="9699" cy:directed="1"/>
      <edge id="12254" label="1000100110 (1) 1000100100" source="9677" target="10067" cy:directed="1"/>
      <edge id="12253" label="1000100110 (1) 1000100010" source="9677" target="9915" cy:directed="1"/>
      <edge id="12252" label="1000100110 (1) 1000110110" source="9677" target="9541" cy:directed="1"/>
      <edge id="12251" label="1000100110 (1) 1001100110" source="9677" target="9590" cy:directed="1"/>
      <edge id="12250" label="1000100110 (1) 1010100110" source="9677" target="9646" cy:directed="1"/>
      <edge id="12249" label="1000100110 (1) 1100100110" source="9677" target="9674" cy:directed="1"/>
      <edge id="12248" label="0000100110 (1) 0000100100" source="9676" target="10058" cy:directed="1"/>
      <edge id="12247" label="0000100110 (1) 0000100010" source="9676" target="9910" cy:directed="1"/>
      <edge id="12246" label="0000100110 (1) 0000110110" source="9676" target="9540" cy:directed="1"/>
      <edge id="12245" label="0000100110 (1) 0001100110" source="9676" target="9589" cy:directed="1"/>
      <edge id="12244" label="0000100110 (1) 0010100110" source="9676" target="9644" cy:directed="1"/>
      <edge id="12243" label="1010011110 (1) 1010010110" source="9675" target="9920" cy:directed="1"/>
      <edge id="12242" label="1010011110 (1) 1010001110" source="9675" target="9833" cy:directed="1"/>
      <edge id="12241" label="1100100110 (1) 1100100100" source="9674" target="10051" cy:directed="1"/>
      <edge id="12240" label="1100100110 (1) 1100100010" source="9674" target="9911" cy:directed="1"/>
      <edge id="12239" label="1100100110 (1) 1100110110" source="9674" target="9537" cy:directed="1"/>
      <edge id="12238" label="1100100110 (1) 1101100110" source="9674" target="9578" cy:directed="1"/>
      <edge id="12237" label="1100100110 (1) 1110100110" source="9674" target="9632" cy:directed="1"/>
      <edge id="12236" label="1111101010 (1) 1111101000" source="9673" target="10047" cy:directed="1"/>
      <edge id="12235" label="1111101010 (1) 1111100010" source="9673" target="9927" cy:directed="1"/>
      <edge id="12234" label="1111101010 (1) 1111111010" source="9673" target="9536" cy:directed="1"/>
      <edge id="12233" label="1111101010 (1) 1110101010" source="9673" target="9609" cy:directed="1"/>
      <edge id="12232" label="1111101010 (1) 1101101010" source="9673" target="9708" cy:directed="1"/>
      <edge id="12231" label="0010011110 (1) 0010010110" source="9672" target="9921" cy:directed="1"/>
      <edge id="12230" label="0010011110 (1) 0010001110" source="9672" target="9830" cy:directed="1"/>
      <edge id="12229" label="0111101010 (1) 0111101000" source="9671" target="10038" cy:directed="1"/>
      <edge id="12228" label="0111101010 (1) 0111100010" source="9671" target="9922" cy:directed="1"/>
      <edge id="12227" label="0111101010 (1) 0111111010" source="9671" target="9525" cy:directed="1"/>
      <edge id="12226" label="0111101010 (1) 0110101010" source="9671" target="9599" cy:directed="1"/>
      <edge id="12225" label="0111101010 (1) 0101101010" source="9671" target="9703" cy:directed="1"/>
      <edge id="12224" label="0111101010 (1) 0011101010" source="9671" target="9568" cy:directed="1"/>
      <edge id="12223" label="0100100110 (1) 0100100100" source="9670" target="10043" cy:directed="1"/>
      <edge id="12222" label="0100100110 (1) 0100100010" source="9670" target="9903" cy:directed="1"/>
      <edge id="12221" label="0100100110 (1) 0100110110" source="9670" target="9531" cy:directed="1"/>
      <edge id="12220" label="0100100110 (1) 0101100110" source="9670" target="9576" cy:directed="1"/>
      <edge id="12219" label="0100100110 (1) 0110100110" source="9670" target="9631" cy:directed="1"/>
      <edge id="12218" label="0100100110 (1) 0000100110" source="9670" target="9676" cy:directed="1"/>
      <edge id="12217" label="1110011110 (1) 1110010110" source="9669" target="9916" cy:directed="1"/>
      <edge id="12216" label="1110011110 (1) 1110001110" source="9669" target="9822" cy:directed="1"/>
      <edge id="12215" label="1110011110 (1) 1010011110" source="9669" target="9675" cy:directed="1"/>
      <edge id="12214" label="0110011110 (1) 0110010110" source="9668" target="9917" cy:directed="1"/>
      <edge id="12213" label="0110011110 (1) 0110001110" source="9668" target="9826" cy:directed="1"/>
      <edge id="12212" label="0110011110 (1) 0010011110" source="9668" target="9672" cy:directed="1"/>
      <edge id="12211" label="1001010011 (1) 1001010111" source="9667" target="9359" cy:directed="1"/>
      <edge id="12210" label="1001010011 (1) 1001000011" source="9667" target="9820" cy:directed="1"/>
      <edge id="12209" label="1001010101 (1) 1001010111" source="9666" target="9359" cy:directed="1"/>
      <edge id="12208" label="1001010101 (1) 1001011101" source="9666" target="9418" cy:directed="1"/>
      <edge id="12207" label="1001010101 (1) 1001000101" source="9666" target="9819" cy:directed="1"/>
      <edge id="12206" label="1001010101 (1) 1001110101" source="9666" target="9523" cy:directed="1"/>
      <edge id="12205" label="1001010101 (1) 1011010101" source="9666" target="9619" cy:directed="1"/>
      <edge id="12204" label="1001011001 (1) 1001011011" source="9665" target="9419" cy:directed="1"/>
      <edge id="12203" label="1001011001 (1) 1001011101" source="9665" target="9418" cy:directed="1"/>
      <edge id="12202" label="1001011001 (1) 1001001001" source="9665" target="9638" cy:directed="1"/>
      <edge id="12201" label="0001010011 (1) 0001010111" source="9664" target="9358" cy:directed="1"/>
      <edge id="12200" label="0001010011 (1) 0001000011" source="9664" target="9825" cy:directed="1"/>
      <edge id="12199" label="0001010101 (1) 0001010111" source="9663" target="9358" cy:directed="1"/>
      <edge id="12198" label="0001010101 (1) 0001011101" source="9663" target="9416" cy:directed="1"/>
      <edge id="12197" label="0001010101 (1) 0001000101" source="9663" target="9824" cy:directed="1"/>
      <edge id="12196" label="0001010101 (1) 0001110101" source="9663" target="9517" cy:directed="1"/>
      <edge id="12195" label="0001010101 (1) 0011010101" source="9663" target="9615" cy:directed="1"/>
      <edge id="12194" label="0001011001 (1) 0001011011" source="9662" target="9417" cy:directed="1"/>
      <edge id="12193" label="0001011001 (1) 0001011101" source="9662" target="9416" cy:directed="1"/>
      <edge id="12192" label="0001011001 (1) 0001001001" source="9662" target="9633" cy:directed="1"/>
      <edge id="12191" label="0000101010 (1) 0000101000" source="9661" target="10035" cy:directed="1"/>
      <edge id="12190" label="0000101010 (1) 0000100010" source="9661" target="9910" cy:directed="1"/>
      <edge id="12189" label="0000101010 (1) 0000111010" source="9661" target="9660" cy:directed="1"/>
      <edge id="12188" label="0000101010 (1) 0000001010" source="9661" target="10110" cy:directed="1"/>
      <edge id="12187" label="0000101010 (1) 0001101010" source="9661" target="9659" cy:directed="1"/>
      <edge id="12186" label="0000101010 (1) 0010101010" source="9661" target="9658" cy:directed="1"/>
      <edge id="12185" label="0000111010 (1) 0000111000" source="9660" target="10084" cy:directed="1"/>
      <edge id="12184" label="0000111010 (1) 0000111110" source="9660" target="9464" cy:directed="1"/>
      <edge id="12183" label="0000111010 (1) 0000110010" source="9660" target="9909" cy:directed="1"/>
      <edge id="12182" label="0000111010 (1) 0000011010" source="9660" target="9999" cy:directed="1"/>
      <edge id="12181" label="0000111010 (1) 0001111010" source="9660" target="9569" cy:directed="1"/>
      <edge id="12180" label="0000111010 (1) 0010111010" source="9660" target="9612" cy:directed="1"/>
      <edge id="12179" label="0001101010 (1) 0001101000" source="9659" target="10034" cy:directed="1"/>
      <edge id="12178" label="0001101010 (1) 0001100010" source="9659" target="9908" cy:directed="1"/>
      <edge id="12177" label="0001101010 (1) 0001111010" source="9659" target="9569" cy:directed="1"/>
      <edge id="12176" label="0001101010 (1) 0001001010" source="9659" target="10076" cy:directed="1"/>
      <edge id="12175" label="0001101010 (1) 0011101010" source="9659" target="9568" cy:directed="1"/>
      <edge id="12174" label="0010101010 (1) 0010101000" source="9658" target="10033" cy:directed="1"/>
      <edge id="12173" label="0010101010 (1) 0010100010" source="9658" target="9907" cy:directed="1"/>
      <edge id="12172" label="0010101010 (1) 0010111010" source="9658" target="9612" cy:directed="1"/>
      <edge id="12171" label="0010101010 (1) 0010001010" source="9658" target="10087" cy:directed="1"/>
      <edge id="12170" label="1000101010 (1) 1000101000" source="9657" target="10032" cy:directed="1"/>
      <edge id="12169" label="1000101010 (1) 1000100010" source="9657" target="9915" cy:directed="1"/>
      <edge id="12168" label="1000101010 (1) 1000111010" source="9657" target="9656" cy:directed="1"/>
      <edge id="12167" label="1000101010 (1) 1000001010" source="9657" target="10114" cy:directed="1"/>
      <edge id="12166" label="1000101010 (1) 1001101010" source="9657" target="9655" cy:directed="1"/>
      <edge id="12165" label="1000101010 (1) 1010101010" source="9657" target="9654" cy:directed="1"/>
      <edge id="12164" label="1000101010 (1) 1100101010" source="9657" target="9653" cy:directed="1"/>
      <edge id="12163" label="1000111010 (1) 1000111000" source="9656" target="10086" cy:directed="1"/>
      <edge id="12162" label="1000111010 (1) 1000111110" source="9656" target="9465" cy:directed="1"/>
      <edge id="12161" label="1000111010 (1) 1000110010" source="9656" target="9914" cy:directed="1"/>
      <edge id="12160" label="1000111010 (1) 1000011010" source="9656" target="10001" cy:directed="1"/>
      <edge id="12159" label="1000111010 (1) 1001111010" source="9656" target="9567" cy:directed="1"/>
      <edge id="12158" label="1000111010 (1) 1010111010" source="9656" target="9610" cy:directed="1"/>
      <edge id="12157" label="1001101010 (1) 1001101000" source="9655" target="10031" cy:directed="1"/>
      <edge id="12156" label="1001101010 (1) 1001100010" source="9655" target="9913" cy:directed="1"/>
      <edge id="12155" label="1001101010 (1) 1001111010" source="9655" target="9567" cy:directed="1"/>
      <edge id="12154" label="1001101010 (1) 1001001010" source="9655" target="10078" cy:directed="1"/>
      <edge id="12153" label="1001101010 (1) 1011101010" source="9655" target="9566" cy:directed="1"/>
      <edge id="12152" label="1001101010 (1) 1101101010" source="9655" target="9708" cy:directed="1"/>
      <edge id="12151" label="1010101010 (1) 1010101000" source="9654" target="10030" cy:directed="1"/>
      <edge id="12150" label="1010101010 (1) 1010100010" source="9654" target="9912" cy:directed="1"/>
      <edge id="12149" label="1010101010 (1) 1010111010" source="9654" target="9610" cy:directed="1"/>
      <edge id="12148" label="1010101010 (1) 1010001010" source="9654" target="10090" cy:directed="1"/>
      <edge id="12147" label="1010101010 (1) 1110101010" source="9654" target="9609" cy:directed="1"/>
      <edge id="12146" label="1100101010 (1) 1100101000" source="9653" target="10029" cy:directed="1"/>
      <edge id="12145" label="1100101010 (1) 1100100010" source="9653" target="9911" cy:directed="1"/>
      <edge id="12144" label="1100101010 (1) 1100111010" source="9653" target="9645" cy:directed="1"/>
      <edge id="12143" label="1100101010 (1) 1100001010" source="9653" target="10108" cy:directed="1"/>
      <edge id="12142" label="1100101010 (1) 1101101010" source="9653" target="9708" cy:directed="1"/>
      <edge id="12141" label="1101010011 (1) 1101010111" source="9652" target="9350" cy:directed="1"/>
      <edge id="12140" label="1101010011 (1) 1101000011" source="9652" target="9815" cy:directed="1"/>
      <edge id="12139" label="1101010011 (1) 1101110011" source="9652" target="9314" cy:directed="1"/>
      <edge id="12138" label="1101010011 (1) 1001010011" source="9652" target="9667" cy:directed="1"/>
      <edge id="12137" label="1101010101 (1) 1101010111" source="9651" target="9350" cy:directed="1"/>
      <edge id="12136" label="1101010101 (1) 1101011101" source="9651" target="9414" cy:directed="1"/>
      <edge id="12135" label="1101010101 (1) 1101000101" source="9651" target="9814" cy:directed="1"/>
      <edge id="12134" label="1101010101 (1) 1101110101" source="9651" target="9511" cy:directed="1"/>
      <edge id="12133" label="1101010101 (1) 1111010101" source="9651" target="9602" cy:directed="1"/>
      <edge id="12132" label="1101010101 (1) 1001010101" source="9651" target="9666" cy:directed="1"/>
      <edge id="12131" label="1101011001 (1) 1101011011" source="9650" target="9415" cy:directed="1"/>
      <edge id="12130" label="1101011001 (1) 1101011101" source="9650" target="9414" cy:directed="1"/>
      <edge id="12129" label="1101011001 (1) 1101001001" source="9650" target="9628" cy:directed="1"/>
      <edge id="12128" label="1101011001 (1) 1101111001" source="9650" target="9510" cy:directed="1"/>
      <edge id="12127" label="1101011001 (1) 1001011001" source="9650" target="9665" cy:directed="1"/>
      <edge id="12126" label="0101010011 (1) 0101010111" source="9649" target="9347" cy:directed="1"/>
      <edge id="12125" label="0101010011 (1) 0101000011" source="9649" target="9812" cy:directed="1"/>
      <edge id="12124" label="0101010011 (1) 0101110011" source="9649" target="9308" cy:directed="1"/>
      <edge id="12123" label="0101010011 (1) 0001010011" source="9649" target="9664" cy:directed="1"/>
      <edge id="12122" label="0101010101 (1) 0101010111" source="9648" target="9347" cy:directed="1"/>
      <edge id="12121" label="0101010101 (1) 0101011101" source="9648" target="9412" cy:directed="1"/>
      <edge id="12120" label="0101010101 (1) 0101000101" source="9648" target="9811" cy:directed="1"/>
      <edge id="12119" label="0101010101 (1) 0101110101" source="9648" target="9509" cy:directed="1"/>
      <edge id="12118" label="0101010101 (1) 0111010101" source="9648" target="9606" cy:directed="1"/>
      <edge id="12117" label="0101010101 (1) 0001010101" source="9648" target="9663" cy:directed="1"/>
      <edge id="12116" label="0101011001 (1) 0101011011" source="9647" target="9413" cy:directed="1"/>
      <edge id="12115" label="0101011001 (1) 0101011101" source="9647" target="9412" cy:directed="1"/>
      <edge id="12114" label="0101011001 (1) 0101001001" source="9647" target="9624" cy:directed="1"/>
      <edge id="12113" label="0101011001 (1) 0101111001" source="9647" target="9508" cy:directed="1"/>
      <edge id="12112" label="0101011001 (1) 0001011001" source="9647" target="9662" cy:directed="1"/>
      <edge id="12111" label="1010100110 (1) 1010100100" source="9646" target="10027" cy:directed="1"/>
      <edge id="12110" label="1010100110 (1) 1010100010" source="9646" target="9912" cy:directed="1"/>
      <edge id="12109" label="1010100110 (1) 1010110110" source="9646" target="9507" cy:directed="1"/>
      <edge id="12108" label="1010100110 (1) 1110100110" source="9646" target="9632" cy:directed="1"/>
      <edge id="12107" label="1100111010 (1) 1100111000" source="9645" target="10081" cy:directed="1"/>
      <edge id="12106" label="1100111010 (1) 1100111110" source="9645" target="9462" cy:directed="1"/>
      <edge id="12105" label="1100111010 (1) 1100110010" source="9645" target="9905" cy:directed="1"/>
      <edge id="12104" label="1100111010 (1) 1100011010" source="9645" target="9995" cy:directed="1"/>
      <edge id="12103" label="1100111010 (1) 1101111010" source="9645" target="9565" cy:directed="1"/>
      <edge id="12102" label="1100111010 (1) 1000111010" source="9645" target="9656" cy:directed="1"/>
      <edge id="12101" label="0010100110 (1) 0010100100" source="9644" target="10025" cy:directed="1"/>
      <edge id="12100" label="0010100110 (1) 0010100010" source="9644" target="9907" cy:directed="1"/>
      <edge id="12099" label="0010100110 (1) 0010110110" source="9644" target="9506" cy:directed="1"/>
      <edge id="12098" label="0100101010 (1) 0100101000" source="9643" target="10024" cy:directed="1"/>
      <edge id="12097" label="0100101010 (1) 0100100010" source="9643" target="9903" cy:directed="1"/>
      <edge id="12096" label="0100101010 (1) 0100111010" source="9643" target="9642" cy:directed="1"/>
      <edge id="12095" label="0100101010 (1) 0100001010" source="9643" target="10105" cy:directed="1"/>
      <edge id="12094" label="0100101010 (1) 0101101010" source="9643" target="9703" cy:directed="1"/>
      <edge id="12093" label="0100101010 (1) 0000101010" source="9643" target="9661" cy:directed="1"/>
      <edge id="12092" label="0100111010 (1) 0100111000" source="9642" target="10080" cy:directed="1"/>
      <edge id="12091" label="0100111010 (1) 0100111110" source="9642" target="9460" cy:directed="1"/>
      <edge id="12090" label="0100111010 (1) 0100110010" source="9642" target="9902" cy:directed="1"/>
      <edge id="12089" label="0100111010 (1) 0100011010" source="9642" target="9989" cy:directed="1"/>
      <edge id="12088" label="0100111010 (1) 0101111010" source="9642" target="9554" cy:directed="1"/>
      <edge id="12087" label="0100111010 (1) 0000111010" source="9642" target="9660" cy:directed="1"/>
      <edge id="12086" label="1000001001 (1) 1000001011" source="9641" target="9640" cy:directed="1"/>
      <edge id="12085" label="1000001001 (1) 1000001101" source="9641" target="9639" cy:directed="1"/>
      <edge id="12084" label="1000001001 (1) 1000000001" source="9641" target="9897" cy:directed="1"/>
      <edge id="12083" label="1000001001 (1) 1001001001" source="9641" target="9638" cy:directed="1"/>
      <edge id="12082" label="1000001001 (1) 1100001001" source="9641" target="9637" cy:directed="1"/>
      <edge id="12081" label="1000001011 (1) 1000001111" source="9640" target="9339" cy:directed="1"/>
      <edge id="12080" label="1000001011 (1) 1000000011" source="9640" target="9896" cy:directed="1"/>
      <edge id="12079" label="1000001011 (1) 1001001011" source="9640" target="9562" cy:directed="1"/>
      <edge id="12078" label="1000001011 (1) 1100001011" source="9640" target="9630" cy:directed="1"/>
      <edge id="12077" label="1000001101 (1) 1000001111" source="9639" target="9339" cy:directed="1"/>
      <edge id="12076" label="1000001101 (1) 1000000101" source="9639" target="9895" cy:directed="1"/>
      <edge id="12075" label="1000001101 (1) 1001001101" source="9639" target="9561" cy:directed="1"/>
      <edge id="12074" label="1000001101 (1) 1010001101" source="9639" target="9595" cy:directed="1"/>
      <edge id="12073" label="1000001101 (1) 1100001101" source="9639" target="9629" cy:directed="1"/>
      <edge id="12072" label="1001001001 (1) 1001001011" source="9638" target="9562" cy:directed="1"/>
      <edge id="12071" label="1001001001 (1) 1001001101" source="9638" target="9561" cy:directed="1"/>
      <edge id="12070" label="1001001001 (1) 1001000001" source="9638" target="9894" cy:directed="1"/>
      <edge id="12069" label="1001001001 (1) 1101001001" source="9638" target="9628" cy:directed="1"/>
      <edge id="12068" label="1100001001 (1) 1100001011" source="9637" target="9630" cy:directed="1"/>
      <edge id="12067" label="1100001001 (1) 1100001101" source="9637" target="9629" cy:directed="1"/>
      <edge id="12066" label="1100001001 (1) 1100000001" source="9637" target="9893" cy:directed="1"/>
      <edge id="12065" label="1100001001 (1) 1101001001" source="9637" target="9628" cy:directed="1"/>
      <edge id="12064" label="0000001001 (1) 0000001011" source="9636" target="9635" cy:directed="1"/>
      <edge id="12063" label="0000001001 (1) 0000001101" source="9636" target="9634" cy:directed="1"/>
      <edge id="12062" label="0000001001 (1) 0000000001" source="9636" target="9901" cy:directed="1"/>
      <edge id="12061" label="0000001001 (1) 0001001001" source="9636" target="9633" cy:directed="1"/>
      <edge id="12060" label="0000001011 (1) 0000001111" source="9635" target="9340" cy:directed="1"/>
      <edge id="12059" label="0000001011 (1) 0000000011" source="9635" target="9900" cy:directed="1"/>
      <edge id="12058" label="0000001011 (1) 0001001011" source="9635" target="9559" cy:directed="1"/>
      <edge id="12057" label="0000001101 (1) 0000001111" source="9634" target="9340" cy:directed="1"/>
      <edge id="12056" label="0000001101 (1) 0000000101" source="9634" target="9899" cy:directed="1"/>
      <edge id="12055" label="0000001101 (1) 0001001101" source="9634" target="9558" cy:directed="1"/>
      <edge id="12054" label="0000001101 (1) 0010001101" source="9634" target="9591" cy:directed="1"/>
      <edge id="12053" label="0001001001 (1) 0001001011" source="9633" target="9559" cy:directed="1"/>
      <edge id="12052" label="0001001001 (1) 0001001101" source="9633" target="9558" cy:directed="1"/>
      <edge id="12051" label="0001001001 (1) 0001000001" source="9633" target="9898" cy:directed="1"/>
      <edge id="12050" label="1110100110 (1) 1110100100" source="9632" target="10021" cy:directed="1"/>
      <edge id="12049" label="1110100110 (1) 1110100010" source="9632" target="9878" cy:directed="1"/>
      <edge id="12048" label="1110100110 (1) 1110110110" source="9632" target="9496" cy:directed="1"/>
      <edge id="12047" label="0110100110 (1) 0110100100" source="9631" target="10018" cy:directed="1"/>
      <edge id="12046" label="0110100110 (1) 0110100010" source="9631" target="9862" cy:directed="1"/>
      <edge id="12045" label="0110100110 (1) 0110110110" source="9631" target="9495" cy:directed="1"/>
      <edge id="12044" label="0110100110 (1) 0010100110" source="9631" target="9644" cy:directed="1"/>
      <edge id="12043" label="1100001011 (1) 1100001111" source="9630" target="9333" cy:directed="1"/>
      <edge id="12042" label="1100001011 (1) 1100000011" source="9630" target="9890" cy:directed="1"/>
      <edge id="12041" label="1100001011 (1) 1101001011" source="9630" target="9551" cy:directed="1"/>
      <edge id="12040" label="1100001101 (1) 1100001111" source="9629" target="9333" cy:directed="1"/>
      <edge id="12039" label="1100001101 (1) 1100000101" source="9629" target="9889" cy:directed="1"/>
      <edge id="12038" label="1100001101 (1) 1101001101" source="9629" target="9550" cy:directed="1"/>
      <edge id="12037" label="1100001101 (1) 1110001101" source="9629" target="9587" cy:directed="1"/>
      <edge id="12036" label="1101001001 (1) 1101001011" source="9628" target="9551" cy:directed="1"/>
      <edge id="12035" label="1101001001 (1) 1101001101" source="9628" target="9550" cy:directed="1"/>
      <edge id="12034" label="1101001001 (1) 1101000001" source="9628" target="9888" cy:directed="1"/>
      <edge id="12033" label="1101001001 (1) 1101101001" source="9628" target="9549" cy:directed="1"/>
      <edge id="12032" label="0100001001 (1) 0100001011" source="9627" target="9626" cy:directed="1"/>
      <edge id="12031" label="0100001001 (1) 0100001101" source="9627" target="9625" cy:directed="1"/>
      <edge id="12030" label="0100001001 (1) 0100000001" source="9627" target="9887" cy:directed="1"/>
      <edge id="12029" label="0100001001 (1) 0101001001" source="9627" target="9624" cy:directed="1"/>
      <edge id="12028" label="0100001001 (1) 0000001001" source="9627" target="9636" cy:directed="1"/>
      <edge id="12027" label="0100001011 (1) 0100001111" source="9626" target="9331" cy:directed="1"/>
      <edge id="12026" label="0100001011 (1) 0100000011" source="9626" target="9886" cy:directed="1"/>
      <edge id="12025" label="0100001011 (1) 0101001011" source="9626" target="9546" cy:directed="1"/>
      <edge id="12024" label="0100001011 (1) 0000001011" source="9626" target="9635" cy:directed="1"/>
      <edge id="12023" label="0100001101 (1) 0100001111" source="9625" target="9331" cy:directed="1"/>
      <edge id="12022" label="0100001101 (1) 0100000101" source="9625" target="9885" cy:directed="1"/>
      <edge id="12021" label="0100001101 (1) 0101001101" source="9625" target="9545" cy:directed="1"/>
      <edge id="12020" label="0100001101 (1) 0110001101" source="9625" target="9582" cy:directed="1"/>
      <edge id="12019" label="0100001101 (1) 0000001101" source="9625" target="9634" cy:directed="1"/>
      <edge id="12018" label="0101001001 (1) 0101001011" source="9624" target="9546" cy:directed="1"/>
      <edge id="12017" label="0101001001 (1) 0101001101" source="9624" target="9545" cy:directed="1"/>
      <edge id="12016" label="0101001001 (1) 0101000001" source="9624" target="9884" cy:directed="1"/>
      <edge id="12015" label="0101001001 (1) 0101101001" source="9624" target="9544" cy:directed="1"/>
      <edge id="12014" label="0101001001 (1) 0001001001" source="9624" target="9633" cy:directed="1"/>
      <edge id="12013" label="1001011110 (1) 1001010110" source="9623" target="9881" cy:directed="1"/>
      <edge id="12012" label="1001011110 (1) 1001001110" source="9623" target="9806" cy:directed="1"/>
      <edge id="12011" label="1001011110 (1) 1011011110" source="9623" target="9579" cy:directed="1"/>
      <edge id="12010" label="0001011110 (1) 0001010110" source="9622" target="9883" cy:directed="1"/>
      <edge id="12009" label="0001011110 (1) 0001001110" source="9622" target="9801" cy:directed="1"/>
      <edge id="12008" label="0001011110 (1) 0011011110" source="9622" target="9577" cy:directed="1"/>
      <edge id="12007" label="1011010001 (1) 1011010011" source="9621" target="9620" cy:directed="1"/>
      <edge id="12006" label="1011010001 (1) 1011010101" source="9621" target="9619" cy:directed="1"/>
      <edge id="12005" label="1011010001 (1) 1011011001" source="9621" target="9618" cy:directed="1"/>
      <edge id="12004" label="1011010001 (1) 1011000001" source="9621" target="9798" cy:directed="1"/>
      <edge id="12003" label="1011010001 (1) 1010010001" source="9621" target="9696" cy:directed="1"/>
      <edge id="12002" label="1011010001 (1) 1001010001" source="9621" target="9735" cy:directed="1"/>
      <edge id="12001" label="1011010011 (1) 1011010111" source="9620" target="9328" cy:directed="1"/>
      <edge id="12000" label="1011010011 (1) 1011000011" source="9620" target="9797" cy:directed="1"/>
      <edge id="11999" label="1011010011 (1) 1010010011" source="9620" target="9695" cy:directed="1"/>
      <edge id="11998" label="1011010011 (1) 1001010011" source="9620" target="9667" cy:directed="1"/>
      <edge id="11997" label="1011010101 (1) 1011010111" source="9619" target="9328" cy:directed="1"/>
      <edge id="11996" label="1011010101 (1) 1011011101" source="9619" target="9408" cy:directed="1"/>
      <edge id="11995" label="1011010101 (1) 1011000101" source="9619" target="9796" cy:directed="1"/>
      <edge id="11994" label="1011010101 (1) 1011110101" source="9619" target="9488" cy:directed="1"/>
      <edge id="11993" label="1011010101 (1) 1010010101" source="9619" target="9694" cy:directed="1"/>
      <edge id="11992" label="1011011001 (1) 1011011011" source="9618" target="9409" cy:directed="1"/>
      <edge id="11991" label="1011011001 (1) 1011011101" source="9618" target="9408" cy:directed="1"/>
      <edge id="11990" label="1011011001 (1) 1011001001" source="9618" target="9529" cy:directed="1"/>
      <edge id="11989" label="1011011001 (1) 1010011001" source="9618" target="9693" cy:directed="1"/>
      <edge id="11988" label="1011011001 (1) 1001011001" source="9618" target="9665" cy:directed="1"/>
      <edge id="11987" label="0011010001 (1) 0011010011" source="9617" target="9616" cy:directed="1"/>
      <edge id="11986" label="0011010001 (1) 0011010101" source="9617" target="9615" cy:directed="1"/>
      <edge id="11985" label="0011010001 (1) 0011011001" source="9617" target="9614" cy:directed="1"/>
      <edge id="11984" label="0011010001 (1) 0011000001" source="9617" target="9804" cy:directed="1"/>
      <edge id="11983" label="0011010001 (1) 0010010001" source="9617" target="9702" cy:directed="1"/>
      <edge id="11982" label="0011010001 (1) 0001010001" source="9617" target="9730" cy:directed="1"/>
      <edge id="11981" label="0011010011 (1) 0011010111" source="9616" target="9326" cy:directed="1"/>
      <edge id="11980" label="0011010011 (1) 0011000011" source="9616" target="9803" cy:directed="1"/>
      <edge id="11979" label="0011010011 (1) 0010010011" source="9616" target="9701" cy:directed="1"/>
      <edge id="11978" label="0011010011 (1) 0001010011" source="9616" target="9664" cy:directed="1"/>
      <edge id="11977" label="0011010101 (1) 0011010111" source="9615" target="9326" cy:directed="1"/>
      <edge id="11976" label="0011010101 (1) 0011011101" source="9615" target="9404" cy:directed="1"/>
      <edge id="11975" label="0011010101 (1) 0011000101" source="9615" target="9802" cy:directed="1"/>
      <edge id="11974" label="0011010101 (1) 0011110101" source="9615" target="9485" cy:directed="1"/>
      <edge id="11973" label="0011010101 (1) 0010010101" source="9615" target="9700" cy:directed="1"/>
      <edge id="11972" label="0011011001 (1) 0011011011" source="9614" target="9405" cy:directed="1"/>
      <edge id="11971" label="0011011001 (1) 0011011101" source="9614" target="9404" cy:directed="1"/>
      <edge id="11970" label="0011011001 (1) 0011001001" source="9614" target="9534" cy:directed="1"/>
      <edge id="11969" label="0011011001 (1) 0010011001" source="9614" target="9699" cy:directed="1"/>
      <edge id="11968" label="0011011001 (1) 0001011001" source="9614" target="9662" cy:directed="1"/>
      <edge id="11967" label="1101011110 (1) 1101010110" source="9613" target="9874" cy:directed="1"/>
      <edge id="11966" label="1101011110 (1) 1101001110" source="9613" target="9794" cy:directed="1"/>
      <edge id="11965" label="1101011110 (1) 1101111110" source="9613" target="9421" cy:directed="1"/>
      <edge id="11964" label="1101011110 (1) 1111011110" source="9613" target="9571" cy:directed="1"/>
      <edge id="11963" label="1101011110 (1) 1001011110" source="9613" target="9623" cy:directed="1"/>
      <edge id="11962" label="0010111010 (1) 0010111000" source="9612" target="10077" cy:directed="1"/>
      <edge id="11961" label="0010111010 (1) 0010111110" source="9612" target="9438" cy:directed="1"/>
      <edge id="11960" label="0010111010 (1) 0010110010" source="9612" target="9877" cy:directed="1"/>
      <edge id="11959" label="0010111010 (1) 0010011010" source="9612" target="9980" cy:directed="1"/>
      <edge id="11958" label="0101011110 (1) 0101010110" source="9611" target="9876" cy:directed="1"/>
      <edge id="11957" label="0101011110 (1) 0101001110" source="9611" target="9791" cy:directed="1"/>
      <edge id="11956" label="0101011110 (1) 0101111110" source="9611" target="9420" cy:directed="1"/>
      <edge id="11955" label="0101011110 (1) 0111011110" source="9611" target="9570" cy:directed="1"/>
      <edge id="11954" label="0101011110 (1) 0001011110" source="9611" target="9622" cy:directed="1"/>
      <edge id="11953" label="1010111010 (1) 1010111000" source="9610" target="10079" cy:directed="1"/>
      <edge id="11952" label="1010111010 (1) 1010111110" source="9610" target="9439" cy:directed="1"/>
      <edge id="11951" label="1010111010 (1) 1010110010" source="9610" target="9879" cy:directed="1"/>
      <edge id="11950" label="1010111010 (1) 1010011010" source="9610" target="9982" cy:directed="1"/>
      <edge id="11949" label="1110101010 (1) 1110101000" source="9609" target="10015" cy:directed="1"/>
      <edge id="11948" label="1110101010 (1) 1110100010" source="9609" target="9878" cy:directed="1"/>
      <edge id="11947" label="1110101010 (1) 1110111010" source="9609" target="9600" cy:directed="1"/>
      <edge id="11946" label="1110101010 (1) 1110001010" source="9609" target="10085" cy:directed="1"/>
      <edge id="11945" label="1110101010 (1) 1100101010" source="9609" target="9653" cy:directed="1"/>
      <edge id="11944" label="0111010001 (1) 0111010011" source="9608" target="9607" cy:directed="1"/>
      <edge id="11943" label="0111010001 (1) 0111010101" source="9608" target="9606" cy:directed="1"/>
      <edge id="11942" label="0111010001 (1) 0111011001" source="9608" target="9605" cy:directed="1"/>
      <edge id="11941" label="0111010001 (1) 0111000001" source="9608" target="9785" cy:directed="1"/>
      <edge id="11940" label="0111010001 (1) 0111110001" source="9608" target="9682" cy:directed="1"/>
      <edge id="11939" label="0111010001 (1) 0110010001" source="9608" target="9681" cy:directed="1"/>
      <edge id="11938" label="0111010001 (1) 0101010001" source="9608" target="9710" cy:directed="1"/>
      <edge id="11937" label="0111010001 (1) 0011010001" source="9608" target="9617" cy:directed="1"/>
      <edge id="11936" label="0111010011 (1) 0111010111" source="9607" target="9324" cy:directed="1"/>
      <edge id="11935" label="0111010011 (1) 0111000011" source="9607" target="9784" cy:directed="1"/>
      <edge id="11934" label="0111010011 (1) 0111110011" source="9607" target="9298" cy:directed="1"/>
      <edge id="11933" label="0111010011 (1) 0110010011" source="9607" target="9680" cy:directed="1"/>
      <edge id="11932" label="0111010011 (1) 0101010011" source="9607" target="9649" cy:directed="1"/>
      <edge id="11931" label="0111010011 (1) 0011010011" source="9607" target="9616" cy:directed="1"/>
      <edge id="11930" label="0111010101 (1) 0111010111" source="9606" target="9324" cy:directed="1"/>
      <edge id="11929" label="0111010101 (1) 0111011101" source="9606" target="9396" cy:directed="1"/>
      <edge id="11928" label="0111010101 (1) 0111000101" source="9606" target="9783" cy:directed="1"/>
      <edge id="11927" label="0111010101 (1) 0111110101" source="9606" target="9481" cy:directed="1"/>
      <edge id="11926" label="0111010101 (1) 0110010101" source="9606" target="9679" cy:directed="1"/>
      <edge id="11925" label="0111010101 (1) 0011010101" source="9606" target="9615" cy:directed="1"/>
      <edge id="11924" label="0111011001 (1) 0111011011" source="9605" target="9397" cy:directed="1"/>
      <edge id="11923" label="0111011001 (1) 0111011101" source="9605" target="9396" cy:directed="1"/>
      <edge id="11922" label="0111011001 (1) 0111001001" source="9605" target="9515" cy:directed="1"/>
      <edge id="11921" label="0111011001 (1) 0111111001" source="9605" target="9480" cy:directed="1"/>
      <edge id="11920" label="0111011001 (1) 0110011001" source="9605" target="9678" cy:directed="1"/>
      <edge id="11919" label="0111011001 (1) 0101011001" source="9605" target="9647" cy:directed="1"/>
      <edge id="11918" label="0111011001 (1) 0011011001" source="9605" target="9614" cy:directed="1"/>
      <edge id="11917" label="1111010001 (1) 1111010011" source="9604" target="9603" cy:directed="1"/>
      <edge id="11916" label="1111010001 (1) 1111010101" source="9604" target="9602" cy:directed="1"/>
      <edge id="11915" label="1111010001 (1) 1111011001" source="9604" target="9601" cy:directed="1"/>
      <edge id="11914" label="1111010001 (1) 1111000001" source="9604" target="9795" cy:directed="1"/>
      <edge id="11913" label="1111010001 (1) 1111110001" source="9604" target="9688" cy:directed="1"/>
      <edge id="11912" label="1111010001 (1) 1110010001" source="9604" target="9687" cy:directed="1"/>
      <edge id="11911" label="1111010001 (1) 1101010001" source="9604" target="9717" cy:directed="1"/>
      <edge id="11910" label="1111010001 (1) 1011010001" source="9604" target="9621" cy:directed="1"/>
      <edge id="11909" label="1111010011 (1) 1111010111" source="9603" target="9325" cy:directed="1"/>
      <edge id="11908" label="1111010011 (1) 1111000011" source="9603" target="9788" cy:directed="1"/>
      <edge id="11907" label="1111010011 (1) 1111110011" source="9603" target="9294" cy:directed="1"/>
      <edge id="11906" label="1111010011 (1) 1110010011" source="9603" target="9686" cy:directed="1"/>
      <edge id="11905" label="1111010011 (1) 1101010011" source="9603" target="9652" cy:directed="1"/>
      <edge id="11904" label="1111010011 (1) 1011010011" source="9603" target="9620" cy:directed="1"/>
      <edge id="11903" label="1111010101 (1) 1111010111" source="9602" target="9325" cy:directed="1"/>
      <edge id="11902" label="1111010101 (1) 1111011101" source="9602" target="9394" cy:directed="1"/>
      <edge id="11901" label="1111010101 (1) 1111000101" source="9602" target="9787" cy:directed="1"/>
      <edge id="11900" label="1111010101 (1) 1111110101" source="9602" target="9483" cy:directed="1"/>
      <edge id="11899" label="1111010101 (1) 1110010101" source="9602" target="9685" cy:directed="1"/>
      <edge id="11898" label="1111010101 (1) 1011010101" source="9602" target="9619" cy:directed="1"/>
      <edge id="11897" label="1111011001 (1) 1111011011" source="9601" target="9395" cy:directed="1"/>
      <edge id="11896" label="1111011001 (1) 1111011101" source="9601" target="9394" cy:directed="1"/>
      <edge id="11895" label="1111011001 (1) 1111001001" source="9601" target="9526" cy:directed="1"/>
      <edge id="11894" label="1111011001 (1) 1111111001" source="9601" target="9482" cy:directed="1"/>
      <edge id="11893" label="1111011001 (1) 1110011001" source="9601" target="9684" cy:directed="1"/>
      <edge id="11892" label="1111011001 (1) 1101011001" source="9601" target="9650" cy:directed="1"/>
      <edge id="11891" label="1111011001 (1) 1011011001" source="9601" target="9618" cy:directed="1"/>
      <edge id="11890" label="1110111010 (1) 1110111000" source="9600" target="10075" cy:directed="1"/>
      <edge id="11889" label="1110111010 (1) 1110111110" source="9600" target="9437" cy:directed="1"/>
      <edge id="11888" label="1110111010 (1) 1110110010" source="9600" target="9872" cy:directed="1"/>
      <edge id="11887" label="1110111010 (1) 1110011010" source="9600" target="9977" cy:directed="1"/>
      <edge id="11886" label="1110111010 (1) 1100111010" source="9600" target="9645" cy:directed="1"/>
      <edge id="11885" label="1110111010 (1) 1010111010" source="9600" target="9610" cy:directed="1"/>
      <edge id="11884" label="0110101010 (1) 0110101000" source="9599" target="10014" cy:directed="1"/>
      <edge id="11883" label="0110101010 (1) 0110100010" source="9599" target="9862" cy:directed="1"/>
      <edge id="11882" label="0110101010 (1) 0110111010" source="9599" target="9598" cy:directed="1"/>
      <edge id="11881" label="0110101010 (1) 0110001010" source="9599" target="10082" cy:directed="1"/>
      <edge id="11880" label="0110101010 (1) 0100101010" source="9599" target="9643" cy:directed="1"/>
      <edge id="11879" label="0110101010 (1) 0010101010" source="9599" target="9658" cy:directed="1"/>
      <edge id="11878" label="0110111010 (1) 0110111000" source="9598" target="10072" cy:directed="1"/>
      <edge id="11877" label="0110111010 (1) 0110111110" source="9598" target="9436" cy:directed="1"/>
      <edge id="11876" label="0110111010 (1) 0110110010" source="9598" target="9861" cy:directed="1"/>
      <edge id="11875" label="0110111010 (1) 0110011010" source="9598" target="9974" cy:directed="1"/>
      <edge id="11874" label="0110111010 (1) 0100111010" source="9598" target="9642" cy:directed="1"/>
      <edge id="11873" label="0110111010 (1) 0010111010" source="9598" target="9612" cy:directed="1"/>
      <edge id="11872" label="1010001001 (1) 1010001011" source="9597" target="9596" cy:directed="1"/>
      <edge id="11871" label="1010001001 (1) 1010001101" source="9597" target="9595" cy:directed="1"/>
      <edge id="11870" label="1010001001 (1) 1010000001" source="9597" target="9860" cy:directed="1"/>
      <edge id="11869" label="1010001001 (1) 1000001001" source="9597" target="9641" cy:directed="1"/>
      <edge id="11868" label="1010001001 (1) 1110001001" source="9597" target="9594" cy:directed="1"/>
      <edge id="11867" label="1010001011 (1) 1010001111" source="9596" target="9322" cy:directed="1"/>
      <edge id="11866" label="1010001011 (1) 1010000011" source="9596" target="9859" cy:directed="1"/>
      <edge id="11865" label="1010001011 (1) 1000001011" source="9596" target="9640" cy:directed="1"/>
      <edge id="11864" label="1010001011 (1) 1110001011" source="9596" target="9588" cy:directed="1"/>
      <edge id="11863" label="1010001101 (1) 1010001111" source="9595" target="9322" cy:directed="1"/>
      <edge id="11862" label="1010001101 (1) 1010000101" source="9595" target="9858" cy:directed="1"/>
      <edge id="11861" label="1010001101 (1) 1110001101" source="9595" target="9587" cy:directed="1"/>
      <edge id="11860" label="1110001001 (1) 1110001011" source="9594" target="9588" cy:directed="1"/>
      <edge id="11859" label="1110001001 (1) 1110001101" source="9594" target="9587" cy:directed="1"/>
      <edge id="11858" label="1110001001 (1) 1110000001" source="9594" target="9857" cy:directed="1"/>
      <edge id="11857" label="1110001001 (1) 1100001001" source="9594" target="9637" cy:directed="1"/>
      <edge id="11856" label="0010001001 (1) 0010001011" source="9593" target="9592" cy:directed="1"/>
      <edge id="11855" label="0010001001 (1) 0010001101" source="9593" target="9591" cy:directed="1"/>
      <edge id="11854" label="0010001001 (1) 0010000001" source="9593" target="9856" cy:directed="1"/>
      <edge id="11853" label="0010001001 (1) 0000001001" source="9593" target="9636" cy:directed="1"/>
      <edge id="11852" label="0010001011 (1) 0010001111" source="9592" target="9323" cy:directed="1"/>
      <edge id="11851" label="0010001011 (1) 0010000011" source="9592" target="9855" cy:directed="1"/>
      <edge id="11850" label="0010001011 (1) 0000001011" source="9592" target="9635" cy:directed="1"/>
      <edge id="11849" label="0010001101 (1) 0010001111" source="9591" target="9323" cy:directed="1"/>
      <edge id="11848" label="0010001101 (1) 0010000101" source="9591" target="9854" cy:directed="1"/>
      <edge id="11847" label="1001100110 (1) 1001100100" source="9590" target="10012" cy:directed="1"/>
      <edge id="11846" label="1001100110 (1) 1001100010" source="9590" target="9913" cy:directed="1"/>
      <edge id="11845" label="1001100110 (1) 1001110110" source="9590" target="9476" cy:directed="1"/>
      <edge id="11844" label="1001100110 (1) 1011100110" source="9590" target="9560" cy:directed="1"/>
      <edge id="11843" label="1001100110 (1) 1101100110" source="9590" target="9578" cy:directed="1"/>
      <edge id="11842" label="0001100110 (1) 0001100100" source="9589" target="10009" cy:directed="1"/>
      <edge id="11841" label="0001100110 (1) 0001100010" source="9589" target="9908" cy:directed="1"/>
      <edge id="11840" label="0001100110 (1) 0001110110" source="9589" target="9475" cy:directed="1"/>
      <edge id="11839" label="0001100110 (1) 0011100110" source="9589" target="9555" cy:directed="1"/>
      <edge id="11838" label="1110001011 (1) 1110001111" source="9588" target="9313" cy:directed="1"/>
      <edge id="11837" label="1110001011 (1) 1110000011" source="9588" target="9844" cy:directed="1"/>
      <edge id="11836" label="1110001011 (1) 1100001011" source="9588" target="9630" cy:directed="1"/>
      <edge id="11835" label="1110001101 (1) 1110001111" source="9587" target="9313" cy:directed="1"/>
      <edge id="11834" label="1110001101 (1) 1110000101" source="9587" target="9843" cy:directed="1"/>
      <edge id="11833" label="1000110101 (1) 1000111101" source="9586" target="9393" cy:directed="1"/>
      <edge id="11832" label="1000110101 (1) 1001110101" source="9586" target="9523" cy:directed="1"/>
      <edge id="11831" label="1000110101 (1) 1010110101" source="9586" target="9557" cy:directed="1"/>
      <edge id="11830" label="1000111001 (1) 1000111101" source="9585" target="9393" cy:directed="1"/>
      <edge id="11829" label="1000111001 (1) 1000011001" source="9585" target="9736" cy:directed="1"/>
      <edge id="11828" label="1000111001 (1) 1001111001" source="9585" target="9522" cy:directed="1"/>
      <edge id="11827" label="1000111001 (1) 1010111001" source="9585" target="9556" cy:directed="1"/>
      <edge id="11826" label="0110001001 (1) 0110001011" source="9584" target="9583" cy:directed="1"/>
      <edge id="11825" label="0110001001 (1) 0110001101" source="9584" target="9582" cy:directed="1"/>
      <edge id="11824" label="0110001001 (1) 0110000001" source="9584" target="9842" cy:directed="1"/>
      <edge id="11823" label="0110001001 (1) 0100001001" source="9584" target="9627" cy:directed="1"/>
      <edge id="11822" label="0110001001 (1) 0010001001" source="9584" target="9593" cy:directed="1"/>
      <edge id="11821" label="0110001011 (1) 0110001111" source="9583" target="9310" cy:directed="1"/>
      <edge id="11820" label="0110001011 (1) 0110000011" source="9583" target="9841" cy:directed="1"/>
      <edge id="11819" label="0110001011 (1) 0100001011" source="9583" target="9626" cy:directed="1"/>
      <edge id="11818" label="0110001011 (1) 0010001011" source="9583" target="9592" cy:directed="1"/>
      <edge id="11817" label="0110001101 (1) 0110001111" source="9582" target="9310" cy:directed="1"/>
      <edge id="11816" label="0110001101 (1) 0110000101" source="9582" target="9840" cy:directed="1"/>
      <edge id="11815" label="0110001101 (1) 0010001101" source="9582" target="9591" cy:directed="1"/>
      <edge id="11814" label="0000110101 (1) 0000111101" source="9581" target="9392" cy:directed="1"/>
      <edge id="11813" label="0000110101 (1) 0001110101" source="9581" target="9517" cy:directed="1"/>
      <edge id="11812" label="0000110101 (1) 0010110101" source="9581" target="9564" cy:directed="1"/>
      <edge id="11811" label="0000111001 (1) 0000111101" source="9580" target="9392" cy:directed="1"/>
      <edge id="11810" label="0000111001 (1) 0000011001" source="9580" target="9731" cy:directed="1"/>
      <edge id="11809" label="0000111001 (1) 0001111001" source="9580" target="9516" cy:directed="1"/>
      <edge id="11808" label="0000111001 (1) 0010111001" source="9580" target="9563" cy:directed="1"/>
      <edge id="11807" label="1011011110 (1) 1011010110" source="9579" target="9836" cy:directed="1"/>
      <edge id="11806" label="1011011110 (1) 1011001110" source="9579" target="9770" cy:directed="1"/>
      <edge id="11805" label="1011011110 (1) 1010011110" source="9579" target="9675" cy:directed="1"/>
      <edge id="11804" label="1101100110 (1) 1101100100" source="9578" target="10006" cy:directed="1"/>
      <edge id="11803" label="1101100110 (1) 1101100010" source="9578" target="9959" cy:directed="1"/>
      <edge id="11802" label="1101100110 (1) 1101110110" source="9578" target="9471" cy:directed="1"/>
      <edge id="11801" label="1101100110 (1) 1111100110" source="9578" target="9553" cy:directed="1"/>
      <edge id="11800" label="0011011110 (1) 0011010110" source="9577" target="9837" cy:directed="1"/>
      <edge id="11799" label="0011011110 (1) 0011001110" source="9577" target="9769" cy:directed="1"/>
      <edge id="11798" label="0011011110 (1) 0010011110" source="9577" target="9672" cy:directed="1"/>
      <edge id="11797" label="0101100110 (1) 0101100100" source="9576" target="10003" cy:directed="1"/>
      <edge id="11796" label="0101100110 (1) 0101100010" source="9576" target="9955" cy:directed="1"/>
      <edge id="11795" label="0101100110 (1) 0101110110" source="9576" target="9470" cy:directed="1"/>
      <edge id="11794" label="0101100110 (1) 0111100110" source="9576" target="9552" cy:directed="1"/>
      <edge id="11793" label="0101100110 (1) 0001100110" source="9576" target="9589" cy:directed="1"/>
      <edge id="11792" label="1100110101 (1) 1100111101" source="9575" target="9389" cy:directed="1"/>
      <edge id="11791" label="1100110101 (1) 1101110101" source="9575" target="9511" cy:directed="1"/>
      <edge id="11790" label="1100110101 (1) 1110110101" source="9575" target="9548" cy:directed="1"/>
      <edge id="11789" label="1100110101 (1) 1000110101" source="9575" target="9586" cy:directed="1"/>
      <edge id="11788" label="1100111001 (1) 1100111101" source="9574" target="9389" cy:directed="1"/>
      <edge id="11787" label="1100111001 (1) 1100011001" source="9574" target="9718" cy:directed="1"/>
      <edge id="11786" label="1100111001 (1) 1101111001" source="9574" target="9510" cy:directed="1"/>
      <edge id="11785" label="1100111001 (1) 1000111001" source="9574" target="9585" cy:directed="1"/>
      <edge id="11784" label="0100110101 (1) 0100111101" source="9573" target="9384" cy:directed="1"/>
      <edge id="11783" label="0100110101 (1) 0101110101" source="9573" target="9509" cy:directed="1"/>
      <edge id="11782" label="0100110101 (1) 0110110101" source="9573" target="9543" cy:directed="1"/>
      <edge id="11781" label="0100110101 (1) 0000110101" source="9573" target="9581" cy:directed="1"/>
      <edge id="11780" label="0100111001 (1) 0100111101" source="9572" target="9384" cy:directed="1"/>
      <edge id="11779" label="0100111001 (1) 0100011001" source="9572" target="9711" cy:directed="1"/>
      <edge id="11778" label="0100111001 (1) 0101111001" source="9572" target="9508" cy:directed="1"/>
      <edge id="11777" label="0100111001 (1) 0000111001" source="9572" target="9580" cy:directed="1"/>
      <edge id="11776" label="1111011110 (1) 1111010110" source="9571" target="9834" cy:directed="1"/>
      <edge id="11775" label="1111011110 (1) 1111001110" source="9571" target="9763" cy:directed="1"/>
      <edge id="11774" label="1111011110 (1) 1111111110" source="9571" target="9407" cy:directed="1"/>
      <edge id="11773" label="1111011110 (1) 1110011110" source="9571" target="9669" cy:directed="1"/>
      <edge id="11772" label="1111011110 (1) 1011011110" source="9571" target="9579" cy:directed="1"/>
      <edge id="11771" label="0111011110 (1) 0111010110" source="9570" target="9835" cy:directed="1"/>
      <edge id="11770" label="0111011110 (1) 0111001110" source="9570" target="9761" cy:directed="1"/>
      <edge id="11769" label="0111011110 (1) 0111111110" source="9570" target="9403" cy:directed="1"/>
      <edge id="11768" label="0111011110 (1) 0110011110" source="9570" target="9668" cy:directed="1"/>
      <edge id="11767" label="0111011110 (1) 0011011110" source="9570" target="9577" cy:directed="1"/>
      <edge id="11766" label="0001111010 (1) 0001111000" source="9569" target="10046" cy:directed="1"/>
      <edge id="11765" label="0001111010 (1) 0001111110" source="9569" target="9422" cy:directed="1"/>
      <edge id="11764" label="0001111010 (1) 0001110010" source="9569" target="9829" cy:directed="1"/>
      <edge id="11763" label="0001111010 (1) 0001011010" source="9569" target="9966" cy:directed="1"/>
      <edge id="11762" label="0001111010 (1) 0011111010" source="9569" target="9539" cy:directed="1"/>
      <edge id="11761" label="0011101010 (1) 0011101000" source="9568" target="9997" cy:directed="1"/>
      <edge id="11760" label="0011101010 (1) 0011100010" source="9568" target="9828" cy:directed="1"/>
      <edge id="11759" label="0011101010 (1) 0011111010" source="9568" target="9539" cy:directed="1"/>
      <edge id="11758" label="0011101010 (1) 0011001010" source="9568" target="10054" cy:directed="1"/>
      <edge id="11757" label="0011101010 (1) 0010101010" source="9568" target="9658" cy:directed="1"/>
      <edge id="11756" label="1001111010 (1) 1001111000" source="9567" target="10053" cy:directed="1"/>
      <edge id="11755" label="1001111010 (1) 1001111110" source="9567" target="9423" cy:directed="1"/>
      <edge id="11754" label="1001111010 (1) 1001110010" source="9567" target="9832" cy:directed="1"/>
      <edge id="11753" label="1001111010 (1) 1001011010" source="9567" target="9968" cy:directed="1"/>
      <edge id="11752" label="1001111010 (1) 1011111010" source="9567" target="9538" cy:directed="1"/>
      <edge id="11751" label="1011101010 (1) 1011101000" source="9566" target="9996" cy:directed="1"/>
      <edge id="11750" label="1011101010 (1) 1011100010" source="9566" target="9831" cy:directed="1"/>
      <edge id="11749" label="1011101010 (1) 1011111010" source="9566" target="9538" cy:directed="1"/>
      <edge id="11748" label="1011101010 (1) 1011001010" source="9566" target="10062" cy:directed="1"/>
      <edge id="11747" label="1011101010 (1) 1010101010" source="9566" target="9654" cy:directed="1"/>
      <edge id="11746" label="1011101010 (1) 1111101010" source="9566" target="9673" cy:directed="1"/>
      <edge id="11745" label="1101111010 (1) 1101111000" source="9565" target="10037" cy:directed="1"/>
      <edge id="11744" label="1101111010 (1) 1101111110" source="9565" target="9421" cy:directed="1"/>
      <edge id="11743" label="1101111010 (1) 1101110010" source="9565" target="9827" cy:directed="1"/>
      <edge id="11742" label="1101111010 (1) 1001111010" source="9565" target="9567" cy:directed="1"/>
      <edge id="11741" label="0010110101 (1) 0010111101" source="9564" target="9367" cy:directed="1"/>
      <edge id="11740" label="0010111001 (1) 0010111101" source="9563" target="9367" cy:directed="1"/>
      <edge id="11739" label="0010111001 (1) 0010011001" source="9563" target="9699" cy:directed="1"/>
      <edge id="11738" label="1001001011 (1) 1001001111" source="9562" target="9296" cy:directed="1"/>
      <edge id="11737" label="1001001011 (1) 1001000011" source="9562" target="9820" cy:directed="1"/>
      <edge id="11736" label="1001001011 (1) 1101001011" source="9562" target="9551" cy:directed="1"/>
      <edge id="11735" label="1001001101 (1) 1001001111" source="9561" target="9296" cy:directed="1"/>
      <edge id="11734" label="1001001101 (1) 1001000101" source="9561" target="9819" cy:directed="1"/>
      <edge id="11733" label="1001001101 (1) 1011001101" source="9561" target="9527" cy:directed="1"/>
      <edge id="11732" label="1001001101 (1) 1101001101" source="9561" target="9550" cy:directed="1"/>
      <edge id="11731" label="1011100110 (1) 1011100100" source="9560" target="9992" cy:directed="1"/>
      <edge id="11730" label="1011100110 (1) 1011100010" source="9560" target="9831" cy:directed="1"/>
      <edge id="11729" label="1011100110 (1) 1011110110" source="9560" target="9463" cy:directed="1"/>
      <edge id="11728" label="1011100110 (1) 1010100110" source="9560" target="9646" cy:directed="1"/>
      <edge id="11727" label="1011100110 (1) 1111100110" source="9560" target="9553" cy:directed="1"/>
      <edge id="11726" label="0001001011 (1) 0001001111" source="9559" target="9297" cy:directed="1"/>
      <edge id="11725" label="0001001011 (1) 0001000011" source="9559" target="9825" cy:directed="1"/>
      <edge id="11724" label="0001001101 (1) 0001001111" source="9558" target="9297" cy:directed="1"/>
      <edge id="11723" label="0001001101 (1) 0001000101" source="9558" target="9824" cy:directed="1"/>
      <edge id="11722" label="0001001101 (1) 0011001101" source="9558" target="9532" cy:directed="1"/>
      <edge id="11721" label="1010110101 (1) 1010111101" source="9557" target="9370" cy:directed="1"/>
      <edge id="11720" label="1010111001 (1) 1010111101" source="9556" target="9370" cy:directed="1"/>
      <edge id="11719" label="1010111001 (1) 1010011001" source="9556" target="9693" cy:directed="1"/>
      <edge id="11718" label="0011100110 (1) 0011100100" source="9555" target="9990" cy:directed="1"/>
      <edge id="11717" label="0011100110 (1) 0011100010" source="9555" target="9828" cy:directed="1"/>
      <edge id="11716" label="0011100110 (1) 0011110110" source="9555" target="9461" cy:directed="1"/>
      <edge id="11715" label="0011100110 (1) 0010100110" source="9555" target="9644" cy:directed="1"/>
      <edge id="11714" label="0101111010 (1) 0101111000" source="9554" target="10036" cy:directed="1"/>
      <edge id="11713" label="0101111010 (1) 0101111110" source="9554" target="9420" cy:directed="1"/>
      <edge id="11712" label="0101111010 (1) 0101110010" source="9554" target="9818" cy:directed="1"/>
      <edge id="11711" label="0101111010 (1) 0001111010" source="9554" target="9569" cy:directed="1"/>
      <edge id="11710" label="1111100110 (1) 1111100100" source="9553" target="9986" cy:directed="1"/>
      <edge id="11709" label="1111100110 (1) 1111100010" source="9553" target="9927" cy:directed="1"/>
      <edge id="11708" label="1111100110 (1) 1111110110" source="9553" target="9451" cy:directed="1"/>
      <edge id="11707" label="1111100110 (1) 1110100110" source="9553" target="9632" cy:directed="1"/>
      <edge id="11706" label="0111100110 (1) 0111100100" source="9552" target="9984" cy:directed="1"/>
      <edge id="11705" label="0111100110 (1) 0111100010" source="9552" target="9922" cy:directed="1"/>
      <edge id="11704" label="0111100110 (1) 0111110110" source="9552" target="9450" cy:directed="1"/>
      <edge id="11703" label="0111100110 (1) 0110100110" source="9552" target="9631" cy:directed="1"/>
      <edge id="11702" label="0111100110 (1) 0011100110" source="9552" target="9555" cy:directed="1"/>
      <edge id="11701" label="1101001011 (1) 1101001111" source="9551" target="9293" cy:directed="1"/>
      <edge id="11700" label="1101001011 (1) 1101000011" source="9551" target="9815" cy:directed="1"/>
      <edge id="11699" label="1101001011 (1) 1101101011" source="9551" target="9279" cy:directed="1"/>
      <edge id="11698" label="1101001101 (1) 1101001111" source="9550" target="9293" cy:directed="1"/>
      <edge id="11697" label="1101001101 (1) 1101000101" source="9550" target="9814" cy:directed="1"/>
      <edge id="11696" label="1101001101 (1) 1101101101" source="9550" target="9445" cy:directed="1"/>
      <edge id="11695" label="1101001101 (1) 1111001101" source="9550" target="9520" cy:directed="1"/>
      <edge id="11694" label="1101101001 (1) 1101101101" source="9549" target="9445" cy:directed="1"/>
      <edge id="11693" label="1101101001 (1) 1101100001" source="9549" target="9813" cy:directed="1"/>
      <edge id="11692" label="1101101001 (1) 1101111001" source="9549" target="9510" cy:directed="1"/>
      <edge id="11691" label="1110110101 (1) 1110111101" source="9548" target="9361" cy:directed="1"/>
      <edge id="11690" label="1110110101 (1) 1010110101" source="9548" target="9557" cy:directed="1"/>
      <edge id="11689" label="1110111001 (1) 1110111101" source="9547" target="9361" cy:directed="1"/>
      <edge id="11688" label="1110111001 (1) 1110011001" source="9547" target="9684" cy:directed="1"/>
      <edge id="11687" label="1110111001 (1) 1100111001" source="9547" target="9574" cy:directed="1"/>
      <edge id="11686" label="1110111001 (1) 1010111001" source="9547" target="9556" cy:directed="1"/>
      <edge id="11685" label="0101001011 (1) 0101001111" source="9546" target="9292" cy:directed="1"/>
      <edge id="11684" label="0101001011 (1) 0101000011" source="9546" target="9812" cy:directed="1"/>
      <edge id="11683" label="0101001011 (1) 0101101011" source="9546" target="9276" cy:directed="1"/>
      <edge id="11682" label="0101001011 (1) 0001001011" source="9546" target="9559" cy:directed="1"/>
      <edge id="11681" label="0101001101 (1) 0101001111" source="9545" target="9292" cy:directed="1"/>
      <edge id="11680" label="0101001101 (1) 0101000101" source="9545" target="9811" cy:directed="1"/>
      <edge id="11679" label="0101001101 (1) 0101101101" source="9545" target="9442" cy:directed="1"/>
      <edge id="11678" label="0101001101 (1) 0111001101" source="9545" target="9513" cy:directed="1"/>
      <edge id="11677" label="0101001101 (1) 0001001101" source="9545" target="9558" cy:directed="1"/>
      <edge id="11676" label="0101101001 (1) 0101101101" source="9544" target="9442" cy:directed="1"/>
      <edge id="11675" label="0101101001 (1) 0101100001" source="9544" target="9810" cy:directed="1"/>
      <edge id="11674" label="0101101001 (1) 0101111001" source="9544" target="9508" cy:directed="1"/>
      <edge id="11673" label="0101101001 (1) 0001101001" source="9544" target="9503" cy:directed="1"/>
      <edge id="11672" label="0110110101 (1) 0110111101" source="9543" target="9360" cy:directed="1"/>
      <edge id="11671" label="0110110101 (1) 0010110101" source="9543" target="9564" cy:directed="1"/>
      <edge id="11670" label="0110111001 (1) 0110111101" source="9542" target="9360" cy:directed="1"/>
      <edge id="11669" label="0110111001 (1) 0110011001" source="9542" target="9678" cy:directed="1"/>
      <edge id="11668" label="0110111001 (1) 0100111001" source="9542" target="9572" cy:directed="1"/>
      <edge id="11667" label="0110111001 (1) 0010111001" source="9542" target="9563" cy:directed="1"/>
      <edge id="11666" label="1000110110 (1) 1000110100" source="9541" target="9983" cy:directed="1"/>
      <edge id="11665" label="1000110110 (1) 1000110010" source="9541" target="9914" cy:directed="1"/>
      <edge id="11664" label="1000110110 (1) 1001110110" source="9541" target="9476" cy:directed="1"/>
      <edge id="11663" label="1000110110 (1) 1010110110" source="9541" target="9507" cy:directed="1"/>
      <edge id="11662" label="0000110110 (1) 0000110100" source="9540" target="9978" cy:directed="1"/>
      <edge id="11661" label="0000110110 (1) 0000110010" source="9540" target="9909" cy:directed="1"/>
      <edge id="11660" label="0000110110 (1) 0001110110" source="9540" target="9475" cy:directed="1"/>
      <edge id="11659" label="0000110110 (1) 0010110110" source="9540" target="9506" cy:directed="1"/>
      <edge id="11658" label="0011111010 (1) 0011111000" source="9539" target="10020" cy:directed="1"/>
      <edge id="11657" label="0011111010 (1) 0011111110" source="9539" target="9410" cy:directed="1"/>
      <edge id="11656" label="0011111010 (1) 0011110010" source="9539" target="9808" cy:directed="1"/>
      <edge id="11655" label="0011111010 (1) 0011011010" source="9539" target="9953" cy:directed="1"/>
      <edge id="11654" label="0011111010 (1) 0010111010" source="9539" target="9612" cy:directed="1"/>
      <edge id="11653" label="1011111010 (1) 1011111000" source="9538" target="10023" cy:directed="1"/>
      <edge id="11652" label="1011111010 (1) 1011111110" source="9538" target="9411" cy:directed="1"/>
      <edge id="11651" label="1011111010 (1) 1011110010" source="9538" target="9809" cy:directed="1"/>
      <edge id="11650" label="1011111010 (1) 1011011010" source="9538" target="9957" cy:directed="1"/>
      <edge id="11649" label="1011111010 (1) 1010111010" source="9538" target="9610" cy:directed="1"/>
      <edge id="11648" label="1100110110 (1) 1100110100" source="9537" target="9975" cy:directed="1"/>
      <edge id="11647" label="1100110110 (1) 1100110010" source="9537" target="9905" cy:directed="1"/>
      <edge id="11646" label="1100110110 (1) 1101110110" source="9537" target="9471" cy:directed="1"/>
      <edge id="11645" label="1100110110 (1) 1110110110" source="9537" target="9496" cy:directed="1"/>
      <edge id="11644" label="1100110110 (1) 1000110110" source="9537" target="9541" cy:directed="1"/>
      <edge id="11643" label="1111111010 (1) 1111111000" source="9536" target="10017" cy:directed="1"/>
      <edge id="11642" label="1111111010 (1) 1111111110" source="9536" target="9407" cy:directed="1"/>
      <edge id="11641" label="1111111010 (1) 1111110010" source="9536" target="9807" cy:directed="1"/>
      <edge id="11640" label="1111111010 (1) 1110111010" source="9536" target="9600" cy:directed="1"/>
      <edge id="11639" label="1111111010 (1) 1101111010" source="9536" target="9565" cy:directed="1"/>
      <edge id="11638" label="1111111010 (1) 1011111010" source="9536" target="9538" cy:directed="1"/>
      <edge id="11637" label="1000000111 (1) 1000100111" source="9535" target="9375" cy:directed="1"/>
      <edge id="11636" label="1000000111 (1) 1001000111" source="9535" target="9469" cy:directed="1"/>
      <edge id="11635" label="1000000111 (1) 1010000111" source="9535" target="9493" cy:directed="1"/>
      <edge id="11634" label="1000000111 (1) 1100000111" source="9535" target="9524" cy:directed="1"/>
      <edge id="11633" label="0011001001 (1) 0011001011" source="9534" target="9533" cy:directed="1"/>
      <edge id="11632" label="0011001001 (1) 0011001101" source="9534" target="9532" cy:directed="1"/>
      <edge id="11631" label="0011001001 (1) 0011000001" source="9534" target="9804" cy:directed="1"/>
      <edge id="11630" label="0011001001 (1) 0010001001" source="9534" target="9593" cy:directed="1"/>
      <edge id="11629" label="0011001001 (1) 0001001001" source="9534" target="9633" cy:directed="1"/>
      <edge id="11628" label="0011001011 (1) 0011001111" source="9533" target="9291" cy:directed="1"/>
      <edge id="11627" label="0011001011 (1) 0011000011" source="9533" target="9803" cy:directed="1"/>
      <edge id="11626" label="0011001011 (1) 0010001011" source="9533" target="9592" cy:directed="1"/>
      <edge id="11625" label="0011001011 (1) 0001001011" source="9533" target="9559" cy:directed="1"/>
      <edge id="11624" label="0011001101 (1) 0011001111" source="9532" target="9291" cy:directed="1"/>
      <edge id="11623" label="0011001101 (1) 0011000101" source="9532" target="9802" cy:directed="1"/>
      <edge id="11622" label="0011001101 (1) 0010001101" source="9532" target="9591" cy:directed="1"/>
      <edge id="11621" label="0100110110 (1) 0100110100" source="9531" target="9972" cy:directed="1"/>
      <edge id="11620" label="0100110110 (1) 0100110010" source="9531" target="9902" cy:directed="1"/>
      <edge id="11619" label="0100110110 (1) 0101110110" source="9531" target="9470" cy:directed="1"/>
      <edge id="11618" label="0100110110 (1) 0110110110" source="9531" target="9495" cy:directed="1"/>
      <edge id="11617" label="0100110110 (1) 0000110110" source="9531" target="9540" cy:directed="1"/>
      <edge id="11616" label="0000000111 (1) 0000100111" source="9530" target="9380" cy:directed="1"/>
      <edge id="11615" label="0000000111 (1) 0001000111" source="9530" target="9468" cy:directed="1"/>
      <edge id="11614" label="0000000111 (1) 0010000111" source="9530" target="9494" cy:directed="1"/>
      <edge id="11613" label="1011001001 (1) 1011001011" source="9529" target="9528" cy:directed="1"/>
      <edge id="11612" label="1011001001 (1) 1011001101" source="9529" target="9527" cy:directed="1"/>
      <edge id="11611" label="1011001001 (1) 1011000001" source="9529" target="9798" cy:directed="1"/>
      <edge id="11610" label="1011001001 (1) 1010001001" source="9529" target="9597" cy:directed="1"/>
      <edge id="11609" label="1011001001 (1) 1001001001" source="9529" target="9638" cy:directed="1"/>
      <edge id="11608" label="1011001001 (1) 1111001001" source="9529" target="9526" cy:directed="1"/>
      <edge id="11607" label="1011001011 (1) 1011001111" source="9528" target="9290" cy:directed="1"/>
      <edge id="11606" label="1011001011 (1) 1011000011" source="9528" target="9797" cy:directed="1"/>
      <edge id="11605" label="1011001011 (1) 1010001011" source="9528" target="9596" cy:directed="1"/>
      <edge id="11604" label="1011001011 (1) 1001001011" source="9528" target="9562" cy:directed="1"/>
      <edge id="11603" label="1011001011 (1) 1111001011" source="9528" target="9521" cy:directed="1"/>
      <edge id="11602" label="1011001101 (1) 1011001111" source="9527" target="9290" cy:directed="1"/>
      <edge id="11601" label="1011001101 (1) 1011000101" source="9527" target="9796" cy:directed="1"/>
      <edge id="11600" label="1011001101 (1) 1010001101" source="9527" target="9595" cy:directed="1"/>
      <edge id="11599" label="1011001101 (1) 1111001101" source="9527" target="9520" cy:directed="1"/>
      <edge id="11598" label="1111001001 (1) 1111001011" source="9526" target="9521" cy:directed="1"/>
      <edge id="11597" label="1111001001 (1) 1111001101" source="9526" target="9520" cy:directed="1"/>
      <edge id="11596" label="1111001001 (1) 1111000001" source="9526" target="9795" cy:directed="1"/>
      <edge id="11595" label="1111001001 (1) 1111101001" source="9526" target="9519" cy:directed="1"/>
      <edge id="11594" label="1111001001 (1) 1110001001" source="9526" target="9594" cy:directed="1"/>
      <edge id="11593" label="1111001001 (1) 1101001001" source="9526" target="9628" cy:directed="1"/>
      <edge id="11592" label="0111111010 (1) 0111111000" source="9525" target="10016" cy:directed="1"/>
      <edge id="11591" label="0111111010 (1) 0111111110" source="9525" target="9403" cy:directed="1"/>
      <edge id="11590" label="0111111010 (1) 0111110010" source="9525" target="9799" cy:directed="1"/>
      <edge id="11589" label="0111111010 (1) 0110111010" source="9525" target="9598" cy:directed="1"/>
      <edge id="11588" label="0111111010 (1) 0101111010" source="9525" target="9554" cy:directed="1"/>
      <edge id="11587" label="0111111010 (1) 0011111010" source="9525" target="9539" cy:directed="1"/>
      <edge id="11586" label="1100000111 (1) 1100100111" source="9524" target="9369" cy:directed="1"/>
      <edge id="11585" label="1100000111 (1) 1101000111" source="9524" target="9467" cy:directed="1"/>
      <edge id="11584" label="1100000111 (1) 1110000111" source="9524" target="9489" cy:directed="1"/>
      <edge id="11583" label="1001110101 (1) 1001111101" source="9523" target="9332" cy:directed="1"/>
      <edge id="11582" label="1001110101 (1) 1011110101" source="9523" target="9488" cy:directed="1"/>
      <edge id="11581" label="1001111001 (1) 1001111101" source="9522" target="9332" cy:directed="1"/>
      <edge id="11580" label="1001111001 (1) 1001011001" source="9522" target="9665" cy:directed="1"/>
      <edge id="11579" label="1001111001 (1) 1011111001" source="9522" target="9487" cy:directed="1"/>
      <edge id="11578" label="1111001011 (1) 1111001111" source="9521" target="9289" cy:directed="1"/>
      <edge id="11577" label="1111001011 (1) 1111000011" source="9521" target="9788" cy:directed="1"/>
      <edge id="11576" label="1111001011 (1) 1111101011" source="9521" target="9269" cy:directed="1"/>
      <edge id="11575" label="1111001011 (1) 1110001011" source="9521" target="9588" cy:directed="1"/>
      <edge id="11574" label="1111001011 (1) 1101001011" source="9521" target="9551" cy:directed="1"/>
      <edge id="11573" label="1111001101 (1) 1111001111" source="9520" target="9289" cy:directed="1"/>
      <edge id="11572" label="1111001101 (1) 1111000101" source="9520" target="9787" cy:directed="1"/>
      <edge id="11571" label="1111001101 (1) 1111101101" source="9520" target="9427" cy:directed="1"/>
      <edge id="11570" label="1111001101 (1) 1110001101" source="9520" target="9587" cy:directed="1"/>
      <edge id="11569" label="1111101001 (1) 1111101101" source="9519" target="9427" cy:directed="1"/>
      <edge id="11568" label="1111101001 (1) 1111100001" source="9519" target="9786" cy:directed="1"/>
      <edge id="11567" label="1111101001 (1) 1111111001" source="9519" target="9482" cy:directed="1"/>
      <edge id="11566" label="1111101001 (1) 1110101001" source="9519" target="9477" cy:directed="1"/>
      <edge id="11565" label="1111101001 (1) 1101101001" source="9519" target="9549" cy:directed="1"/>
      <edge id="11564" label="0100000111 (1) 0100100111" source="9518" target="9365" cy:directed="1"/>
      <edge id="11563" label="0100000111 (1) 0101000111" source="9518" target="9466" cy:directed="1"/>
      <edge id="11562" label="0100000111 (1) 0110000111" source="9518" target="9486" cy:directed="1"/>
      <edge id="11561" label="0100000111 (1) 0000000111" source="9518" target="9530" cy:directed="1"/>
      <edge id="11560" label="0001110101 (1) 0001111101" source="9517" target="9330" cy:directed="1"/>
      <edge id="11559" label="0001110101 (1) 0011110101" source="9517" target="9485" cy:directed="1"/>
      <edge id="11558" label="0001111001 (1) 0001111101" source="9516" target="9330" cy:directed="1"/>
      <edge id="11557" label="0001111001 (1) 0001011001" source="9516" target="9662" cy:directed="1"/>
      <edge id="11556" label="0001111001 (1) 0011111001" source="9516" target="9484" cy:directed="1"/>
      <edge id="11555" label="0111001001 (1) 0111001011" source="9515" target="9514" cy:directed="1"/>
      <edge id="11554" label="0111001001 (1) 0111001101" source="9515" target="9513" cy:directed="1"/>
      <edge id="11553" label="0111001001 (1) 0111000001" source="9515" target="9785" cy:directed="1"/>
      <edge id="11552" label="0111001001 (1) 0111101001" source="9515" target="9512" cy:directed="1"/>
      <edge id="11551" label="0111001001 (1) 0110001001" source="9515" target="9584" cy:directed="1"/>
      <edge id="11550" label="0111001001 (1) 0101001001" source="9515" target="9624" cy:directed="1"/>
      <edge id="11549" label="0111001001 (1) 0011001001" source="9515" target="9534" cy:directed="1"/>
      <edge id="11548" label="0111001011 (1) 0111001111" source="9514" target="9288" cy:directed="1"/>
      <edge id="11547" label="0111001011 (1) 0111000011" source="9514" target="9784" cy:directed="1"/>
      <edge id="11546" label="0111001011 (1) 0111101011" source="9514" target="9272" cy:directed="1"/>
      <edge id="11545" label="0111001011 (1) 0110001011" source="9514" target="9583" cy:directed="1"/>
      <edge id="11544" label="0111001011 (1) 0101001011" source="9514" target="9546" cy:directed="1"/>
      <edge id="11543" label="0111001011 (1) 0011001011" source="9514" target="9533" cy:directed="1"/>
      <edge id="11542" label="0111001101 (1) 0111001111" source="9513" target="9288" cy:directed="1"/>
      <edge id="11541" label="0111001101 (1) 0111000101" source="9513" target="9783" cy:directed="1"/>
      <edge id="11540" label="0111001101 (1) 0111101101" source="9513" target="9424" cy:directed="1"/>
      <edge id="11539" label="0111001101 (1) 0110001101" source="9513" target="9582" cy:directed="1"/>
      <edge id="11538" label="0111001101 (1) 0011001101" source="9513" target="9532" cy:directed="1"/>
      <edge id="11537" label="0111101001 (1) 0111101101" source="9512" target="9424" cy:directed="1"/>
      <edge id="11536" label="0111101001 (1) 0111100001" source="9512" target="9782" cy:directed="1"/>
      <edge id="11535" label="0111101001 (1) 0111111001" source="9512" target="9480" cy:directed="1"/>
      <edge id="11534" label="0111101001 (1) 0110101001" source="9512" target="9473" cy:directed="1"/>
      <edge id="11533" label="0111101001 (1) 0101101001" source="9512" target="9544" cy:directed="1"/>
      <edge id="11532" label="0111101001 (1) 0011101001" source="9512" target="9454" cy:directed="1"/>
      <edge id="11531" label="1101110101 (1) 1101111101" source="9511" target="9329" cy:directed="1"/>
      <edge id="11530" label="1101110101 (1) 1111110101" source="9511" target="9483" cy:directed="1"/>
      <edge id="11529" label="1101110101 (1) 1001110101" source="9511" target="9523" cy:directed="1"/>
      <edge id="11528" label="1101111001 (1) 1101111101" source="9510" target="9329" cy:directed="1"/>
      <edge id="11527" label="1101111001 (1) 1001111001" source="9510" target="9522" cy:directed="1"/>
      <edge id="11526" label="0101110101 (1) 0101111101" source="9509" target="9327" cy:directed="1"/>
      <edge id="11525" label="0101110101 (1) 0111110101" source="9509" target="9481" cy:directed="1"/>
      <edge id="11524" label="0101110101 (1) 0001110101" source="9509" target="9517" cy:directed="1"/>
      <edge id="11523" label="0101111001 (1) 0101111101" source="9508" target="9327" cy:directed="1"/>
      <edge id="11522" label="0101111001 (1) 0001111001" source="9508" target="9516" cy:directed="1"/>
      <edge id="11521" label="1010110110 (1) 1010110100" source="9507" target="9971" cy:directed="1"/>
      <edge id="11520" label="1010110110 (1) 1010110010" source="9507" target="9879" cy:directed="1"/>
      <edge id="11519" label="0010110110 (1) 0010110100" source="9506" target="9970" cy:directed="1"/>
      <edge id="11518" label="0010110110 (1) 0010110010" source="9506" target="9877" cy:directed="1"/>
      <edge id="11517" label="0000101001 (1) 0000101101" source="9505" target="9504" cy:directed="1"/>
      <edge id="11516" label="0000101001 (1) 0000100001" source="9505" target="9781" cy:directed="1"/>
      <edge id="11515" label="0000101001 (1) 0000111001" source="9505" target="9580" cy:directed="1"/>
      <edge id="11514" label="0000101001 (1) 0000001001" source="9505" target="9636" cy:directed="1"/>
      <edge id="11513" label="0000101001 (1) 0001101001" source="9505" target="9503" cy:directed="1"/>
      <edge id="11512" label="0000101001 (1) 0010101001" source="9505" target="9502" cy:directed="1"/>
      <edge id="11511" label="0000101101 (1) 0000100101" source="9504" target="9780" cy:directed="1"/>
      <edge id="11510" label="0000101101 (1) 0000111101" source="9504" target="9392" cy:directed="1"/>
      <edge id="11509" label="0000101101 (1) 0000001101" source="9504" target="9634" cy:directed="1"/>
      <edge id="11508" label="0000101101 (1) 0001101101" source="9504" target="9455" cy:directed="1"/>
      <edge id="11507" label="0000101101 (1) 0010101101" source="9504" target="9479" cy:directed="1"/>
      <edge id="11506" label="0001101001 (1) 0001101101" source="9503" target="9455" cy:directed="1"/>
      <edge id="11505" label="0001101001 (1) 0001100001" source="9503" target="9778" cy:directed="1"/>
      <edge id="11504" label="0001101001 (1) 0001111001" source="9503" target="9516" cy:directed="1"/>
      <edge id="11503" label="0001101001 (1) 0001001001" source="9503" target="9633" cy:directed="1"/>
      <edge id="11502" label="0001101001 (1) 0011101001" source="9503" target="9454" cy:directed="1"/>
      <edge id="11501" label="0010101001 (1) 0010101101" source="9502" target="9479" cy:directed="1"/>
      <edge id="11500" label="0010101001 (1) 0010100001" source="9502" target="9777" cy:directed="1"/>
      <edge id="11499" label="0010101001 (1) 0010111001" source="9502" target="9563" cy:directed="1"/>
      <edge id="11498" label="0010101001 (1) 0010001001" source="9502" target="9593" cy:directed="1"/>
      <edge id="11497" label="1000101001 (1) 1000101101" source="9501" target="9500" cy:directed="1"/>
      <edge id="11496" label="1000101001 (1) 1000100001" source="9501" target="9776" cy:directed="1"/>
      <edge id="11495" label="1000101001 (1) 1000111001" source="9501" target="9585" cy:directed="1"/>
      <edge id="11494" label="1000101001 (1) 1000001001" source="9501" target="9641" cy:directed="1"/>
      <edge id="11493" label="1000101001 (1) 1001101001" source="9501" target="9499" cy:directed="1"/>
      <edge id="11492" label="1000101001 (1) 1010101001" source="9501" target="9498" cy:directed="1"/>
      <edge id="11491" label="1000101001 (1) 1100101001" source="9501" target="9497" cy:directed="1"/>
      <edge id="11490" label="1000101101 (1) 1000100101" source="9500" target="9775" cy:directed="1"/>
      <edge id="11489" label="1000101101 (1) 1000111101" source="9500" target="9393" cy:directed="1"/>
      <edge id="11488" label="1000101101 (1) 1000001101" source="9500" target="9639" cy:directed="1"/>
      <edge id="11487" label="1000101101 (1) 1001101101" source="9500" target="9453" cy:directed="1"/>
      <edge id="11486" label="1000101101 (1) 1010101101" source="9500" target="9478" cy:directed="1"/>
      <edge id="11485" label="1000101101 (1) 1100101101" source="9500" target="9492" cy:directed="1"/>
      <edge id="11484" label="1001101001 (1) 1001101101" source="9499" target="9453" cy:directed="1"/>
      <edge id="11483" label="1001101001 (1) 1001100001" source="9499" target="9773" cy:directed="1"/>
      <edge id="11482" label="1001101001 (1) 1001111001" source="9499" target="9522" cy:directed="1"/>
      <edge id="11481" label="1001101001 (1) 1001001001" source="9499" target="9638" cy:directed="1"/>
      <edge id="11480" label="1001101001 (1) 1011101001" source="9499" target="9452" cy:directed="1"/>
      <edge id="11479" label="1001101001 (1) 1101101001" source="9499" target="9549" cy:directed="1"/>
      <edge id="11478" label="1010101001 (1) 1010101101" source="9498" target="9478" cy:directed="1"/>
      <edge id="11477" label="1010101001 (1) 1010100001" source="9498" target="9772" cy:directed="1"/>
      <edge id="11476" label="1010101001 (1) 1010111001" source="9498" target="9556" cy:directed="1"/>
      <edge id="11475" label="1010101001 (1) 1010001001" source="9498" target="9597" cy:directed="1"/>
      <edge id="11474" label="1010101001 (1) 1110101001" source="9498" target="9477" cy:directed="1"/>
      <edge id="11473" label="1100101001 (1) 1100101101" source="9497" target="9492" cy:directed="1"/>
      <edge id="11472" label="1100101001 (1) 1100100001" source="9497" target="9771" cy:directed="1"/>
      <edge id="11471" label="1100101001 (1) 1100111001" source="9497" target="9574" cy:directed="1"/>
      <edge id="11470" label="1100101001 (1) 1100001001" source="9497" target="9637" cy:directed="1"/>
      <edge id="11469" label="1100101001 (1) 1101101001" source="9497" target="9549" cy:directed="1"/>
      <edge id="11468" label="1110110110 (1) 1110110100" source="9496" target="9969" cy:directed="1"/>
      <edge id="11467" label="1110110110 (1) 1110110010" source="9496" target="9872" cy:directed="1"/>
      <edge id="11466" label="1110110110 (1) 1010110110" source="9496" target="9507" cy:directed="1"/>
      <edge id="11465" label="0110110110 (1) 0110110100" source="9495" target="9964" cy:directed="1"/>
      <edge id="11464" label="0110110110 (1) 0110110010" source="9495" target="9861" cy:directed="1"/>
      <edge id="11463" label="0110110110 (1) 0010110110" source="9495" target="9506" cy:directed="1"/>
      <edge id="11462" label="0010000111 (1) 0010100111" source="9494" target="9349" cy:directed="1"/>
      <edge id="11461" label="1010000111 (1) 1010100111" source="9493" target="9346" cy:directed="1"/>
      <edge id="11460" label="1010000111 (1) 1110000111" source="9493" target="9489" cy:directed="1"/>
      <edge id="11459" label="1100101101 (1) 1100100101" source="9492" target="9768" cy:directed="1"/>
      <edge id="11458" label="1100101101 (1) 1100111101" source="9492" target="9389" cy:directed="1"/>
      <edge id="11457" label="1100101101 (1) 1100001101" source="9492" target="9629" cy:directed="1"/>
      <edge id="11456" label="1100101101 (1) 1101101101" source="9492" target="9445" cy:directed="1"/>
      <edge id="11455" label="1100101101 (1) 1110101101" source="9492" target="9474" cy:directed="1"/>
      <edge id="11454" label="0100101001 (1) 0100101101" source="9491" target="9490" cy:directed="1"/>
      <edge id="11453" label="0100101001 (1) 0100100001" source="9491" target="9766" cy:directed="1"/>
      <edge id="11452" label="0100101001 (1) 0100111001" source="9491" target="9572" cy:directed="1"/>
      <edge id="11451" label="0100101001 (1) 0100001001" source="9491" target="9627" cy:directed="1"/>
      <edge id="11450" label="0100101001 (1) 0101101001" source="9491" target="9544" cy:directed="1"/>
      <edge id="11449" label="0100101001 (1) 0000101001" source="9491" target="9505" cy:directed="1"/>
      <edge id="11448" label="0100101101 (1) 0100100101" source="9490" target="9765" cy:directed="1"/>
      <edge id="11447" label="0100101101 (1) 0100111101" source="9490" target="9384" cy:directed="1"/>
      <edge id="11446" label="0100101101 (1) 0100001101" source="9490" target="9625" cy:directed="1"/>
      <edge id="11445" label="0100101101 (1) 0101101101" source="9490" target="9442" cy:directed="1"/>
      <edge id="11444" label="0100101101 (1) 0110101101" source="9490" target="9472" cy:directed="1"/>
      <edge id="11443" label="0100101101 (1) 0000101101" source="9490" target="9504" cy:directed="1"/>
      <edge id="11442" label="1110000111 (1) 1110100111" source="9489" target="9338" cy:directed="1"/>
      <edge id="11441" label="1011110101 (1) 1011111101" source="9488" target="9311" cy:directed="1"/>
      <edge id="11440" label="1011110101 (1) 1010110101" source="9488" target="9557" cy:directed="1"/>
      <edge id="11439" label="1011111001 (1) 1011111101" source="9487" target="9311" cy:directed="1"/>
      <edge id="11438" label="1011111001 (1) 1011011001" source="9487" target="9618" cy:directed="1"/>
      <edge id="11437" label="1011111001 (1) 1010111001" source="9487" target="9556" cy:directed="1"/>
      <edge id="11436" label="0110000111 (1) 0110100111" source="9486" target="9335" cy:directed="1"/>
      <edge id="11435" label="0110000111 (1) 0010000111" source="9486" target="9494" cy:directed="1"/>
      <edge id="11434" label="0011110101 (1) 0011111101" source="9485" target="9312" cy:directed="1"/>
      <edge id="11433" label="0011110101 (1) 0010110101" source="9485" target="9564" cy:directed="1"/>
      <edge id="11432" label="0011111001 (1) 0011111101" source="9484" target="9312" cy:directed="1"/>
      <edge id="11431" label="0011111001 (1) 0011011001" source="9484" target="9614" cy:directed="1"/>
      <edge id="11430" label="0011111001 (1) 0010111001" source="9484" target="9563" cy:directed="1"/>
      <edge id="11429" label="1111110101 (1) 1111111101" source="9483" target="9307" cy:directed="1"/>
      <edge id="11428" label="1111110101 (1) 1110110101" source="9483" target="9548" cy:directed="1"/>
      <edge id="11427" label="1111110101 (1) 1011110101" source="9483" target="9488" cy:directed="1"/>
      <edge id="11426" label="1111111001 (1) 1111111101" source="9482" target="9307" cy:directed="1"/>
      <edge id="11425" label="1111111001 (1) 1110111001" source="9482" target="9547" cy:directed="1"/>
      <edge id="11424" label="1111111001 (1) 1101111001" source="9482" target="9510" cy:directed="1"/>
      <edge id="11423" label="1111111001 (1) 1011111001" source="9482" target="9487" cy:directed="1"/>
      <edge id="11422" label="0111110101 (1) 0111111101" source="9481" target="9306" cy:directed="1"/>
      <edge id="11421" label="0111110101 (1) 0110110101" source="9481" target="9543" cy:directed="1"/>
      <edge id="11420" label="0111110101 (1) 0011110101" source="9481" target="9485" cy:directed="1"/>
      <edge id="11419" label="0111111001 (1) 0111111101" source="9480" target="9306" cy:directed="1"/>
      <edge id="11418" label="0111111001 (1) 0110111001" source="9480" target="9542" cy:directed="1"/>
      <edge id="11417" label="0111111001 (1) 0101111001" source="9480" target="9508" cy:directed="1"/>
      <edge id="11416" label="0111111001 (1) 0011111001" source="9480" target="9484" cy:directed="1"/>
      <edge id="11415" label="0010101101 (1) 0010100101" source="9479" target="9752" cy:directed="1"/>
      <edge id="11414" label="0010101101 (1) 0010111101" source="9479" target="9367" cy:directed="1"/>
      <edge id="11413" label="0010101101 (1) 0010001101" source="9479" target="9591" cy:directed="1"/>
      <edge id="11412" label="1010101101 (1) 1010100101" source="9478" target="9750" cy:directed="1"/>
      <edge id="11411" label="1010101101 (1) 1010111101" source="9478" target="9370" cy:directed="1"/>
      <edge id="11410" label="1010101101 (1) 1010001101" source="9478" target="9595" cy:directed="1"/>
      <edge id="11409" label="1010101101 (1) 1110101101" source="9478" target="9474" cy:directed="1"/>
      <edge id="11408" label="1110101001 (1) 1110101101" source="9477" target="9474" cy:directed="1"/>
      <edge id="11407" label="1110101001 (1) 1110100001" source="9477" target="9748" cy:directed="1"/>
      <edge id="11406" label="1110101001 (1) 1110111001" source="9477" target="9547" cy:directed="1"/>
      <edge id="11405" label="1110101001 (1) 1110001001" source="9477" target="9594" cy:directed="1"/>
      <edge id="11404" label="1110101001 (1) 1100101001" source="9477" target="9497" cy:directed="1"/>
      <edge id="11403" label="1001110110 (1) 1001110100" source="9476" target="9958" cy:directed="1"/>
      <edge id="11402" label="1001110110 (1) 1001110010" source="9476" target="9832" cy:directed="1"/>
      <edge id="11401" label="1001110110 (1) 1011110110" source="9476" target="9463" cy:directed="1"/>
      <edge id="11400" label="0001110110 (1) 0001110100" source="9475" target="9954" cy:directed="1"/>
      <edge id="11399" label="0001110110 (1) 0001110010" source="9475" target="9829" cy:directed="1"/>
      <edge id="11398" label="0001110110 (1) 0011110110" source="9475" target="9461" cy:directed="1"/>
      <edge id="11397" label="1110101101 (1) 1110100101" source="9474" target="9744" cy:directed="1"/>
      <edge id="11396" label="1110101101 (1) 1110111101" source="9474" target="9361" cy:directed="1"/>
      <edge id="11395" label="1110101101 (1) 1110001101" source="9474" target="9587" cy:directed="1"/>
      <edge id="11394" label="0110101001 (1) 0110101101" source="9473" target="9472" cy:directed="1"/>
      <edge id="11393" label="0110101001 (1) 0110100001" source="9473" target="9742" cy:directed="1"/>
      <edge id="11392" label="0110101001 (1) 0110111001" source="9473" target="9542" cy:directed="1"/>
      <edge id="11391" label="0110101001 (1) 0110001001" source="9473" target="9584" cy:directed="1"/>
      <edge id="11390" label="0110101001 (1) 0100101001" source="9473" target="9491" cy:directed="1"/>
      <edge id="11389" label="0110101001 (1) 0010101001" source="9473" target="9502" cy:directed="1"/>
      <edge id="11388" label="0110101101 (1) 0110100101" source="9472" target="9741" cy:directed="1"/>
      <edge id="11387" label="0110101101 (1) 0110111101" source="9472" target="9360" cy:directed="1"/>
      <edge id="11386" label="0110101101 (1) 0110001101" source="9472" target="9582" cy:directed="1"/>
      <edge id="11385" label="0110101101 (1) 0010101101" source="9472" target="9479" cy:directed="1"/>
      <edge id="11384" label="1101110110 (1) 1101110100" source="9471" target="9943" cy:directed="1"/>
      <edge id="11383" label="1101110110 (1) 1101110010" source="9471" target="9827" cy:directed="1"/>
      <edge id="11382" label="1101110110 (1) 1111110110" source="9471" target="9451" cy:directed="1"/>
      <edge id="11381" label="1101110110 (1) 1001110110" source="9471" target="9476" cy:directed="1"/>
      <edge id="11380" label="0101110110 (1) 0101110100" source="9470" target="9942" cy:directed="1"/>
      <edge id="11379" label="0101110110 (1) 0101110010" source="9470" target="9818" cy:directed="1"/>
      <edge id="11378" label="0101110110 (1) 0111110110" source="9470" target="9450" cy:directed="1"/>
      <edge id="11377" label="0101110110 (1) 0001110110" source="9470" target="9475" cy:directed="1"/>
      <edge id="11376" label="1001000111 (1) 1001100111" source="9469" target="9318" cy:directed="1"/>
      <edge id="11375" label="1001000111 (1) 1011000111" source="9469" target="9446" cy:directed="1"/>
      <edge id="11374" label="1001000111 (1) 1101000111" source="9469" target="9467" cy:directed="1"/>
      <edge id="11373" label="0001000111 (1) 0001100111" source="9468" target="9321" cy:directed="1"/>
      <edge id="11372" label="0001000111 (1) 0011000111" source="9468" target="9447" cy:directed="1"/>
      <edge id="11371" label="1101000111 (1) 1101100111" source="9467" target="9315" cy:directed="1"/>
      <edge id="11370" label="1101000111 (1) 1111000111" source="9467" target="9441" cy:directed="1"/>
      <edge id="11369" label="0101000111 (1) 0101100111" source="9466" target="9309" cy:directed="1"/>
      <edge id="11368" label="0101000111 (1) 0111000111" source="9466" target="9440" cy:directed="1"/>
      <edge id="11367" label="0101000111 (1) 0001000111" source="9466" target="9468" cy:directed="1"/>
      <edge id="11366" label="1000111110 (1) 1000111100" source="9465" target="9929" cy:directed="1"/>
      <edge id="11365" label="1000111110 (1) 1000110110" source="9465" target="9541" cy:directed="1"/>
      <edge id="11364" label="1000111110 (1) 1000011110" source="9465" target="9707" cy:directed="1"/>
      <edge id="11363" label="1000111110 (1) 1001111110" source="9465" target="9423" cy:directed="1"/>
      <edge id="11362" label="1000111110 (1) 1010111110" source="9465" target="9439" cy:directed="1"/>
      <edge id="11361" label="0000111110 (1) 0000111100" source="9464" target="9928" cy:directed="1"/>
      <edge id="11360" label="0000111110 (1) 0000110110" source="9464" target="9540" cy:directed="1"/>
      <edge id="11359" label="0000111110 (1) 0000011110" source="9464" target="9709" cy:directed="1"/>
      <edge id="11358" label="0000111110 (1) 0001111110" source="9464" target="9422" cy:directed="1"/>
      <edge id="11357" label="0000111110 (1) 0010111110" source="9464" target="9438" cy:directed="1"/>
      <edge id="11356" label="1011110110 (1) 1011110100" source="9463" target="9925" cy:directed="1"/>
      <edge id="11355" label="1011110110 (1) 1011110010" source="9463" target="9809" cy:directed="1"/>
      <edge id="11354" label="1011110110 (1) 1010110110" source="9463" target="9507" cy:directed="1"/>
      <edge id="11353" label="1100111110 (1) 1100111100" source="9462" target="9926" cy:directed="1"/>
      <edge id="11352" label="1100111110 (1) 1100110110" source="9462" target="9537" cy:directed="1"/>
      <edge id="11351" label="1100111110 (1) 1100011110" source="9462" target="9691" cy:directed="1"/>
      <edge id="11350" label="1100111110 (1) 1101111110" source="9462" target="9421" cy:directed="1"/>
      <edge id="11349" label="1100111110 (1) 1110111110" source="9462" target="9437" cy:directed="1"/>
      <edge id="11348" label="1100111110 (1) 1000111110" source="9462" target="9465" cy:directed="1"/>
      <edge id="11347" label="0011110110 (1) 0011110100" source="9461" target="9924" cy:directed="1"/>
      <edge id="11346" label="0011110110 (1) 0011110010" source="9461" target="9808" cy:directed="1"/>
      <edge id="11345" label="0011110110 (1) 0010110110" source="9461" target="9506" cy:directed="1"/>
      <edge id="11344" label="0100111110 (1) 0100111100" source="9460" target="9923" cy:directed="1"/>
      <edge id="11343" label="0100111110 (1) 0100110110" source="9460" target="9531" cy:directed="1"/>
      <edge id="11342" label="0100111110 (1) 0100011110" source="9460" target="9690" cy:directed="1"/>
      <edge id="11341" label="0100111110 (1) 0101111110" source="9460" target="9420" cy:directed="1"/>
      <edge id="11340" label="0100111110 (1) 0110111110" source="9460" target="9436" cy:directed="1"/>
      <edge id="11339" label="0100111110 (1) 0000111110" source="9460" target="9464" cy:directed="1"/>
      <edge id="11338" label="1000011011 (1) 1000011111" source="9459" target="9280" cy:directed="1"/>
      <edge id="11337" label="1000011011 (1) 1000010011" source="9459" target="9738" cy:directed="1"/>
      <edge id="11336" label="1000011011 (1) 1000001011" source="9459" target="9640" cy:directed="1"/>
      <edge id="11335" label="1000011011 (1) 1001011011" source="9459" target="9419" cy:directed="1"/>
      <edge id="11334" label="1000011101 (1) 1000011111" source="9458" target="9280" cy:directed="1"/>
      <edge id="11333" label="1000011101 (1) 1000001101" source="9458" target="9639" cy:directed="1"/>
      <edge id="11332" label="1000011101 (1) 1001011101" source="9458" target="9418" cy:directed="1"/>
      <edge id="11331" label="1000011101 (1) 1010011101" source="9458" target="9434" cy:directed="1"/>
      <edge id="11330" label="0000011011 (1) 0000011111" source="9457" target="9281" cy:directed="1"/>
      <edge id="11329" label="0000011011 (1) 0000010011" source="9457" target="9733" cy:directed="1"/>
      <edge id="11328" label="0000011011 (1) 0000001011" source="9457" target="9635" cy:directed="1"/>
      <edge id="11327" label="0000011011 (1) 0001011011" source="9457" target="9417" cy:directed="1"/>
      <edge id="11326" label="0000011101 (1) 0000011111" source="9456" target="9281" cy:directed="1"/>
      <edge id="11325" label="0000011101 (1) 0000001101" source="9456" target="9634" cy:directed="1"/>
      <edge id="11324" label="0000011101 (1) 0001011101" source="9456" target="9416" cy:directed="1"/>
      <edge id="11323" label="0000011101 (1) 0010011101" source="9456" target="9430" cy:directed="1"/>
      <edge id="11322" label="0001101101 (1) 0001100101" source="9455" target="9729" cy:directed="1"/>
      <edge id="11321" label="0001101101 (1) 0001111101" source="9455" target="9330" cy:directed="1"/>
      <edge id="11320" label="0001101101 (1) 0001001101" source="9455" target="9558" cy:directed="1"/>
      <edge id="11319" label="0001101101 (1) 0011101101" source="9455" target="9432" cy:directed="1"/>
      <edge id="11318" label="0011101001 (1) 0011101101" source="9454" target="9432" cy:directed="1"/>
      <edge id="11317" label="0011101001 (1) 0011100001" source="9454" target="9727" cy:directed="1"/>
      <edge id="11316" label="0011101001 (1) 0011111001" source="9454" target="9484" cy:directed="1"/>
      <edge id="11315" label="0011101001 (1) 0011001001" source="9454" target="9534" cy:directed="1"/>
      <edge id="11314" label="0011101001 (1) 0010101001" source="9454" target="9502" cy:directed="1"/>
      <edge id="11313" label="1001101101 (1) 1001100101" source="9453" target="9726" cy:directed="1"/>
      <edge id="11312" label="1001101101 (1) 1001111101" source="9453" target="9332" cy:directed="1"/>
      <edge id="11311" label="1001101101 (1) 1001001101" source="9453" target="9561" cy:directed="1"/>
      <edge id="11310" label="1001101101 (1) 1011101101" source="9453" target="9433" cy:directed="1"/>
      <edge id="11309" label="1001101101 (1) 1101101101" source="9453" target="9445" cy:directed="1"/>
      <edge id="11308" label="1011101001 (1) 1011101101" source="9452" target="9433" cy:directed="1"/>
      <edge id="11307" label="1011101001 (1) 1011100001" source="9452" target="9724" cy:directed="1"/>
      <edge id="11306" label="1011101001 (1) 1011111001" source="9452" target="9487" cy:directed="1"/>
      <edge id="11305" label="1011101001 (1) 1011001001" source="9452" target="9529" cy:directed="1"/>
      <edge id="11304" label="1011101001 (1) 1010101001" source="9452" target="9498" cy:directed="1"/>
      <edge id="11303" label="1011101001 (1) 1111101001" source="9452" target="9519" cy:directed="1"/>
      <edge id="11302" label="1111110110 (1) 1111110100" source="9451" target="9919" cy:directed="1"/>
      <edge id="11301" label="1111110110 (1) 1111110010" source="9451" target="9807" cy:directed="1"/>
      <edge id="11300" label="1111110110 (1) 1110110110" source="9451" target="9496" cy:directed="1"/>
      <edge id="11299" label="1111110110 (1) 1011110110" source="9451" target="9463" cy:directed="1"/>
      <edge id="11298" label="0111110110 (1) 0111110100" source="9450" target="9918" cy:directed="1"/>
      <edge id="11297" label="0111110110 (1) 0111110010" source="9450" target="9799" cy:directed="1"/>
      <edge id="11296" label="0111110110 (1) 0110110110" source="9450" target="9495" cy:directed="1"/>
      <edge id="11295" label="0111110110 (1) 0011110110" source="9450" target="9461" cy:directed="1"/>
      <edge id="11294" label="0100011011 (1) 0100011111" source="9449" target="9274" cy:directed="1"/>
      <edge id="11293" label="0100011011 (1) 0100010011" source="9449" target="9713" cy:directed="1"/>
      <edge id="11292" label="0100011011 (1) 0100001011" source="9449" target="9626" cy:directed="1"/>
      <edge id="11291" label="0100011011 (1) 0101011011" source="9449" target="9413" cy:directed="1"/>
      <edge id="11290" label="0100011011 (1) 0000011011" source="9449" target="9457" cy:directed="1"/>
      <edge id="11289" label="0100011101 (1) 0100011111" source="9448" target="9274" cy:directed="1"/>
      <edge id="11288" label="0100011101 (1) 0100001101" source="9448" target="9625" cy:directed="1"/>
      <edge id="11287" label="0100011101 (1) 0101011101" source="9448" target="9412" cy:directed="1"/>
      <edge id="11286" label="0100011101 (1) 0110011101" source="9448" target="9425" cy:directed="1"/>
      <edge id="11285" label="0100011101 (1) 0000011101" source="9448" target="9456" cy:directed="1"/>
      <edge id="11284" label="0011000111 (1) 0011100111" source="9447" target="9303" cy:directed="1"/>
      <edge id="11283" label="0011000111 (1) 0010000111" source="9447" target="9494" cy:directed="1"/>
      <edge id="11282" label="1011000111 (1) 1011100111" source="9446" target="9301" cy:directed="1"/>
      <edge id="11281" label="1011000111 (1) 1010000111" source="9446" target="9493" cy:directed="1"/>
      <edge id="11280" label="1011000111 (1) 1111000111" source="9446" target="9441" cy:directed="1"/>
      <edge id="11279" label="1101101101 (1) 1101100101" source="9445" target="9723" cy:directed="1"/>
      <edge id="11278" label="1101101101 (1) 1101111101" source="9445" target="9329" cy:directed="1"/>
      <edge id="11277" label="1101101101 (1) 1111101101" source="9445" target="9427" cy:directed="1"/>
      <edge id="11276" label="1100011011 (1) 1100011111" source="9444" target="9275" cy:directed="1"/>
      <edge id="11275" label="1100011011 (1) 1100010011" source="9444" target="9720" cy:directed="1"/>
      <edge id="11274" label="1100011011 (1) 1100001011" source="9444" target="9630" cy:directed="1"/>
      <edge id="11273" label="1100011011 (1) 1101011011" source="9444" target="9415" cy:directed="1"/>
      <edge id="11272" label="1100011011 (1) 1000011011" source="9444" target="9459" cy:directed="1"/>
      <edge id="11271" label="1100011101 (1) 1100011111" source="9443" target="9275" cy:directed="1"/>
      <edge id="11270" label="1100011101 (1) 1100001101" source="9443" target="9629" cy:directed="1"/>
      <edge id="11269" label="1100011101 (1) 1101011101" source="9443" target="9414" cy:directed="1"/>
      <edge id="11268" label="1100011101 (1) 1110011101" source="9443" target="9428" cy:directed="1"/>
      <edge id="11267" label="1100011101 (1) 1000011101" source="9443" target="9458" cy:directed="1"/>
      <edge id="11266" label="0101101101 (1) 0101100101" source="9442" target="9716" cy:directed="1"/>
      <edge id="11265" label="0101101101 (1) 0101111101" source="9442" target="9327" cy:directed="1"/>
      <edge id="11264" label="0101101101 (1) 0111101101" source="9442" target="9424" cy:directed="1"/>
      <edge id="11263" label="0101101101 (1) 0001101101" source="9442" target="9455" cy:directed="1"/>
      <edge id="11262" label="1111000111 (1) 1111100111" source="9441" target="9295" cy:directed="1"/>
      <edge id="11261" label="1111000111 (1) 1110000111" source="9441" target="9489" cy:directed="1"/>
      <edge id="11260" label="0111000111 (1) 0111100111" source="9440" target="9299" cy:directed="1"/>
      <edge id="11259" label="0111000111 (1) 0110000111" source="9440" target="9486" cy:directed="1"/>
      <edge id="11258" label="0111000111 (1) 0011000111" source="9440" target="9447" cy:directed="1"/>
      <edge id="11257" label="1010111110 (1) 1010111100" source="9439" target="9906" cy:directed="1"/>
      <edge id="11256" label="1010111110 (1) 1010110110" source="9439" target="9507" cy:directed="1"/>
      <edge id="11255" label="1010111110 (1) 1010011110" source="9439" target="9675" cy:directed="1"/>
      <edge id="11254" label="0010111110 (1) 0010111100" source="9438" target="9904" cy:directed="1"/>
      <edge id="11253" label="0010111110 (1) 0010110110" source="9438" target="9506" cy:directed="1"/>
      <edge id="11252" label="0010111110 (1) 0010011110" source="9438" target="9672" cy:directed="1"/>
      <edge id="11251" label="1110111110 (1) 1110111100" source="9437" target="9892" cy:directed="1"/>
      <edge id="11250" label="1110111110 (1) 1110110110" source="9437" target="9496" cy:directed="1"/>
      <edge id="11249" label="1110111110 (1) 1110011110" source="9437" target="9669" cy:directed="1"/>
      <edge id="11248" label="1110111110 (1) 1010111110" source="9437" target="9439" cy:directed="1"/>
      <edge id="11247" label="0110111110 (1) 0110111100" source="9436" target="9891" cy:directed="1"/>
      <edge id="11246" label="0110111110 (1) 0110110110" source="9436" target="9495" cy:directed="1"/>
      <edge id="11245" label="0110111110 (1) 0110011110" source="9436" target="9668" cy:directed="1"/>
      <edge id="11244" label="0110111110 (1) 0010111110" source="9436" target="9438" cy:directed="1"/>
      <edge id="11243" label="1010011011 (1) 1010011111" source="9435" target="9271" cy:directed="1"/>
      <edge id="11242" label="1010011011 (1) 1010010011" source="9435" target="9695" cy:directed="1"/>
      <edge id="11241" label="1010011011 (1) 1010001011" source="9435" target="9596" cy:directed="1"/>
      <edge id="11240" label="1010011011 (1) 1000011011" source="9435" target="9459" cy:directed="1"/>
      <edge id="11239" label="1010011101 (1) 1010011111" source="9434" target="9271" cy:directed="1"/>
      <edge id="11238" label="1010011101 (1) 1010001101" source="9434" target="9595" cy:directed="1"/>
      <edge id="11237" label="1011101101 (1) 1011100101" source="9433" target="9698" cy:directed="1"/>
      <edge id="11236" label="1011101101 (1) 1011111101" source="9433" target="9311" cy:directed="1"/>
      <edge id="11235" label="1011101101 (1) 1011001101" source="9433" target="9527" cy:directed="1"/>
      <edge id="11234" label="1011101101 (1) 1010101101" source="9433" target="9478" cy:directed="1"/>
      <edge id="11233" label="1011101101 (1) 1111101101" source="9433" target="9427" cy:directed="1"/>
      <edge id="11232" label="0011101101 (1) 0011100101" source="9432" target="9705" cy:directed="1"/>
      <edge id="11231" label="0011101101 (1) 0011111101" source="9432" target="9312" cy:directed="1"/>
      <edge id="11230" label="0011101101 (1) 0011001101" source="9432" target="9532" cy:directed="1"/>
      <edge id="11229" label="0011101101 (1) 0010101101" source="9432" target="9479" cy:directed="1"/>
      <edge id="11228" label="0010011011 (1) 0010011111" source="9431" target="9273" cy:directed="1"/>
      <edge id="11227" label="0010011011 (1) 0010010011" source="9431" target="9701" cy:directed="1"/>
      <edge id="11226" label="0010011011 (1) 0010001011" source="9431" target="9592" cy:directed="1"/>
      <edge id="11225" label="0010011011 (1) 0000011011" source="9431" target="9457" cy:directed="1"/>
      <edge id="11224" label="0010011101 (1) 0010011111" source="9430" target="9273" cy:directed="1"/>
      <edge id="11223" label="0010011101 (1) 0010001101" source="9430" target="9591" cy:directed="1"/>
      <edge id="11222" label="1110011011 (1) 1110011111" source="9429" target="9267" cy:directed="1"/>
      <edge id="11221" label="1110011011 (1) 1110010011" source="9429" target="9686" cy:directed="1"/>
      <edge id="11220" label="1110011011 (1) 1110001011" source="9429" target="9588" cy:directed="1"/>
      <edge id="11219" label="1110011011 (1) 1100011011" source="9429" target="9444" cy:directed="1"/>
      <edge id="11218" label="1110011011 (1) 1010011011" source="9429" target="9435" cy:directed="1"/>
      <edge id="11217" label="1110011101 (1) 1110011111" source="9428" target="9267" cy:directed="1"/>
      <edge id="11216" label="1110011101 (1) 1110001101" source="9428" target="9587" cy:directed="1"/>
      <edge id="11215" label="1110011101 (1) 1010011101" source="9428" target="9434" cy:directed="1"/>
      <edge id="11214" label="1111101101 (1) 1111100101" source="9427" target="9689" cy:directed="1"/>
      <edge id="11213" label="1111101101 (1) 1111111101" source="9427" target="9307" cy:directed="1"/>
      <edge id="11212" label="1111101101 (1) 1110101101" source="9427" target="9474" cy:directed="1"/>
      <edge id="11211" label="0110011011 (1) 0110011111" source="9426" target="9265" cy:directed="1"/>
      <edge id="11210" label="0110011011 (1) 0110010011" source="9426" target="9680" cy:directed="1"/>
      <edge id="11209" label="0110011011 (1) 0110001011" source="9426" target="9583" cy:directed="1"/>
      <edge id="11208" label="0110011011 (1) 0100011011" source="9426" target="9449" cy:directed="1"/>
      <edge id="11207" label="0110011011 (1) 0010011011" source="9426" target="9431" cy:directed="1"/>
      <edge id="11206" label="0110011101 (1) 0110011111" source="9425" target="9265" cy:directed="1"/>
      <edge id="11205" label="0110011101 (1) 0110001101" source="9425" target="9582" cy:directed="1"/>
      <edge id="11204" label="0110011101 (1) 0010011101" source="9425" target="9430" cy:directed="1"/>
      <edge id="11203" label="0111101101 (1) 0111100101" source="9424" target="9683" cy:directed="1"/>
      <edge id="11202" label="0111101101 (1) 0111111101" source="9424" target="9306" cy:directed="1"/>
      <edge id="11201" label="0111101101 (1) 0110101101" source="9424" target="9472" cy:directed="1"/>
      <edge id="11200" label="0111101101 (1) 0011101101" source="9424" target="9432" cy:directed="1"/>
      <edge id="11199" label="1001111110 (1) 1001111100" source="9423" target="9853" cy:directed="1"/>
      <edge id="11198" label="1001111110 (1) 1001110110" source="9423" target="9476" cy:directed="1"/>
      <edge id="11197" label="1001111110 (1) 1001011110" source="9423" target="9623" cy:directed="1"/>
      <edge id="11196" label="1001111110 (1) 1011111110" source="9423" target="9411" cy:directed="1"/>
      <edge id="11195" label="0001111110 (1) 0001111100" source="9422" target="9849" cy:directed="1"/>
      <edge id="11194" label="0001111110 (1) 0001110110" source="9422" target="9475" cy:directed="1"/>
      <edge id="11193" label="0001111110 (1) 0001011110" source="9422" target="9622" cy:directed="1"/>
      <edge id="11192" label="0001111110 (1) 0011111110" source="9422" target="9410" cy:directed="1"/>
      <edge id="11191" label="1101111110 (1) 1101111100" source="9421" target="9839" cy:directed="1"/>
      <edge id="11190" label="1101111110 (1) 1101110110" source="9421" target="9471" cy:directed="1"/>
      <edge id="11189" label="1101111110 (1) 1111111110" source="9421" target="9407" cy:directed="1"/>
      <edge id="11188" label="1101111110 (1) 1001111110" source="9421" target="9423" cy:directed="1"/>
      <edge id="11187" label="0101111110 (1) 0101111100" source="9420" target="9838" cy:directed="1"/>
      <edge id="11186" label="0101111110 (1) 0101110110" source="9420" target="9470" cy:directed="1"/>
      <edge id="11185" label="0101111110 (1) 0111111110" source="9420" target="9403" cy:directed="1"/>
      <edge id="11184" label="0101111110 (1) 0001111110" source="9420" target="9422" cy:directed="1"/>
      <edge id="11183" label="1001011011 (1) 1001011111" source="9419" target="9244" cy:directed="1"/>
      <edge id="11182" label="1001011011 (1) 1001010011" source="9419" target="9667" cy:directed="1"/>
      <edge id="11181" label="1001011011 (1) 1001001011" source="9419" target="9562" cy:directed="1"/>
      <edge id="11180" label="1001011101 (1) 1001011111" source="9418" target="9244" cy:directed="1"/>
      <edge id="11179" label="1001011101 (1) 1001001101" source="9418" target="9561" cy:directed="1"/>
      <edge id="11178" label="1001011101 (1) 1011011101" source="9418" target="9408" cy:directed="1"/>
      <edge id="11177" label="0001011011 (1) 0001011111" source="9417" target="9245" cy:directed="1"/>
      <edge id="11176" label="0001011011 (1) 0001010011" source="9417" target="9664" cy:directed="1"/>
      <edge id="11175" label="0001011011 (1) 0001001011" source="9417" target="9559" cy:directed="1"/>
      <edge id="11174" label="0001011101 (1) 0001011111" source="9416" target="9245" cy:directed="1"/>
      <edge id="11173" label="0001011101 (1) 0001001101" source="9416" target="9558" cy:directed="1"/>
      <edge id="11172" label="0001011101 (1) 0011011101" source="9416" target="9404" cy:directed="1"/>
      <edge id="11171" label="1101011011 (1) 1101011111" source="9415" target="9241" cy:directed="1"/>
      <edge id="11170" label="1101011011 (1) 1101010011" source="9415" target="9652" cy:directed="1"/>
      <edge id="11169" label="1101011011 (1) 1101001011" source="9415" target="9551" cy:directed="1"/>
      <edge id="11168" label="1101011011 (1) 1101111011" source="9415" target="9218" cy:directed="1"/>
      <edge id="11167" label="1101011011 (1) 1001011011" source="9415" target="9419" cy:directed="1"/>
      <edge id="11166" label="1101011101 (1) 1101011111" source="9414" target="9241" cy:directed="1"/>
      <edge id="11165" label="1101011101 (1) 1101001101" source="9414" target="9550" cy:directed="1"/>
      <edge id="11164" label="1101011101 (1) 1101111101" source="9414" target="9329" cy:directed="1"/>
      <edge id="11163" label="1101011101 (1) 1111011101" source="9414" target="9394" cy:directed="1"/>
      <edge id="11162" label="1101011101 (1) 1001011101" source="9414" target="9418" cy:directed="1"/>
      <edge id="11161" label="0101011011 (1) 0101011111" source="9413" target="9240" cy:directed="1"/>
      <edge id="11160" label="0101011011 (1) 0101010011" source="9413" target="9649" cy:directed="1"/>
      <edge id="11159" label="0101011011 (1) 0101001011" source="9413" target="9546" cy:directed="1"/>
      <edge id="11158" label="0101011011 (1) 0101111011" source="9413" target="9216" cy:directed="1"/>
      <edge id="11157" label="0101011011 (1) 0001011011" source="9413" target="9417" cy:directed="1"/>
      <edge id="11156" label="0101011101 (1) 0101011111" source="9412" target="9240" cy:directed="1"/>
      <edge id="11155" label="0101011101 (1) 0101001101" source="9412" target="9545" cy:directed="1"/>
      <edge id="11154" label="0101011101 (1) 0101111101" source="9412" target="9327" cy:directed="1"/>
      <edge id="11153" label="0101011101 (1) 0111011101" source="9412" target="9396" cy:directed="1"/>
      <edge id="11152" label="0101011101 (1) 0001011101" source="9412" target="9416" cy:directed="1"/>
      <edge id="11151" label="1011111110 (1) 1011111100" source="9411" target="9823" cy:directed="1"/>
      <edge id="11150" label="1011111110 (1) 1011110110" source="9411" target="9463" cy:directed="1"/>
      <edge id="11149" label="1011111110 (1) 1011011110" source="9411" target="9579" cy:directed="1"/>
      <edge id="11148" label="1011111110 (1) 1010111110" source="9411" target="9439" cy:directed="1"/>
      <edge id="11147" label="0011111110 (1) 0011111100" source="9410" target="9821" cy:directed="1"/>
      <edge id="11146" label="0011111110 (1) 0011110110" source="9410" target="9461" cy:directed="1"/>
      <edge id="11145" label="0011111110 (1) 0011011110" source="9410" target="9577" cy:directed="1"/>
      <edge id="11144" label="0011111110 (1) 0010111110" source="9410" target="9438" cy:directed="1"/>
      <edge id="11143" label="1011011011 (1) 1011011111" source="9409" target="9228" cy:directed="1"/>
      <edge id="11142" label="1011011011 (1) 1011010011" source="9409" target="9620" cy:directed="1"/>
      <edge id="11141" label="1011011011 (1) 1011001011" source="9409" target="9528" cy:directed="1"/>
      <edge id="11140" label="1011011011 (1) 1010011011" source="9409" target="9435" cy:directed="1"/>
      <edge id="11139" label="1011011011 (1) 1001011011" source="9409" target="9419" cy:directed="1"/>
      <edge id="11138" label="1011011101 (1) 1011011111" source="9408" target="9228" cy:directed="1"/>
      <edge id="11137" label="1011011101 (1) 1011001101" source="9408" target="9527" cy:directed="1"/>
      <edge id="11136" label="1011011101 (1) 1010011101" source="9408" target="9434" cy:directed="1"/>
      <edge id="11135" label="1111111110 (1) 1111111100" source="9407" target="9817" cy:directed="1"/>
      <edge id="11134" label="1111111110 (1) 1111110110" source="9407" target="9451" cy:directed="1"/>
      <edge id="11133" label="1111111110 (1) 1110111110" source="9407" target="9437" cy:directed="1"/>
      <edge id="11132" label="1111111110 (1) 1011111110" source="9407" target="9411" cy:directed="1"/>
      <edge id="11131" label="1000010111 (1) 1000000111" source="9406" target="9535" cy:directed="1"/>
      <edge id="11130" label="1000010111 (1) 1000110111" source="9406" target="9287" cy:directed="1"/>
      <edge id="11129" label="1000010111 (1) 1001010111" source="9406" target="9359" cy:directed="1"/>
      <edge id="11128" label="1000010111 (1) 1010010111" source="9406" target="9385" cy:directed="1"/>
      <edge id="11127" label="0011011011 (1) 0011011111" source="9405" target="9229" cy:directed="1"/>
      <edge id="11126" label="0011011011 (1) 0011010011" source="9405" target="9616" cy:directed="1"/>
      <edge id="11125" label="0011011011 (1) 0011001011" source="9405" target="9533" cy:directed="1"/>
      <edge id="11124" label="0011011011 (1) 0010011011" source="9405" target="9431" cy:directed="1"/>
      <edge id="11123" label="0011011011 (1) 0001011011" source="9405" target="9417" cy:directed="1"/>
      <edge id="11122" label="0011011101 (1) 0011011111" source="9404" target="9229" cy:directed="1"/>
      <edge id="11121" label="0011011101 (1) 0011001101" source="9404" target="9532" cy:directed="1"/>
      <edge id="11120" label="0011011101 (1) 0010011101" source="9404" target="9430" cy:directed="1"/>
      <edge id="11119" label="0111111110 (1) 0111111100" source="9403" target="9816" cy:directed="1"/>
      <edge id="11118" label="0111111110 (1) 0111110110" source="9403" target="9450" cy:directed="1"/>
      <edge id="11117" label="0111111110 (1) 0110111110" source="9403" target="9436" cy:directed="1"/>
      <edge id="11116" label="0111111110 (1) 0011111110" source="9403" target="9410" cy:directed="1"/>
      <edge id="11115" label="1101100011 (1) 1101100001" source="9402" target="9813" cy:directed="1"/>
      <edge id="11114" label="1101100011 (1) 1101100111" source="9402" target="9315" cy:directed="1"/>
      <edge id="11113" label="1101100011 (1) 1101110011" source="9402" target="9314" cy:directed="1"/>
      <edge id="11112" label="0000010111 (1) 0000000111" source="9401" target="9530" cy:directed="1"/>
      <edge id="11111" label="0000010111 (1) 0000110111" source="9401" target="9286" cy:directed="1"/>
      <edge id="11110" label="0000010111 (1) 0001010111" source="9401" target="9358" cy:directed="1"/>
      <edge id="11109" label="0000010111 (1) 0010010111" source="9401" target="9391" cy:directed="1"/>
      <edge id="11108" label="0101100011 (1) 0101100001" source="9400" target="9810" cy:directed="1"/>
      <edge id="11107" label="0101100011 (1) 0101100111" source="9400" target="9309" cy:directed="1"/>
      <edge id="11106" label="0101100011 (1) 0101110011" source="9400" target="9308" cy:directed="1"/>
      <edge id="11105" label="0101100011 (1) 0001100011" source="9400" target="9378" cy:directed="1"/>
      <edge id="11104" label="1100010111 (1) 1100000111" source="9399" target="9524" cy:directed="1"/>
      <edge id="11103" label="1100010111 (1) 1100110111" source="9399" target="9285" cy:directed="1"/>
      <edge id="11102" label="1100010111 (1) 1101010111" source="9399" target="9350" cy:directed="1"/>
      <edge id="11101" label="1100010111 (1) 1110010111" source="9399" target="9383" cy:directed="1"/>
      <edge id="11100" label="1100010111 (1) 1000010111" source="9399" target="9406" cy:directed="1"/>
      <edge id="11099" label="0100010111 (1) 0100000111" source="9398" target="9518" cy:directed="1"/>
      <edge id="11098" label="0100010111 (1) 0100110111" source="9398" target="9284" cy:directed="1"/>
      <edge id="11097" label="0100010111 (1) 0101010111" source="9398" target="9347" cy:directed="1"/>
      <edge id="11096" label="0100010111 (1) 0110010111" source="9398" target="9382" cy:directed="1"/>
      <edge id="11095" label="0100010111 (1) 0000010111" source="9398" target="9401" cy:directed="1"/>
      <edge id="11094" label="0111011011 (1) 0111011111" source="9397" target="9226" cy:directed="1"/>
      <edge id="11093" label="0111011011 (1) 0111010011" source="9397" target="9607" cy:directed="1"/>
      <edge id="11092" label="0111011011 (1) 0111001011" source="9397" target="9514" cy:directed="1"/>
      <edge id="11091" label="0111011011 (1) 0111111011" source="9397" target="9208" cy:directed="1"/>
      <edge id="11090" label="0111011011 (1) 0110011011" source="9397" target="9426" cy:directed="1"/>
      <edge id="11089" label="0111011011 (1) 0101011011" source="9397" target="9413" cy:directed="1"/>
      <edge id="11088" label="0111011011 (1) 0011011011" source="9397" target="9405" cy:directed="1"/>
      <edge id="11087" label="0111011101 (1) 0111011111" source="9396" target="9226" cy:directed="1"/>
      <edge id="11086" label="0111011101 (1) 0111001101" source="9396" target="9513" cy:directed="1"/>
      <edge id="11085" label="0111011101 (1) 0111111101" source="9396" target="9306" cy:directed="1"/>
      <edge id="11084" label="0111011101 (1) 0110011101" source="9396" target="9425" cy:directed="1"/>
      <edge id="11083" label="0111011101 (1) 0011011101" source="9396" target="9404" cy:directed="1"/>
      <edge id="11082" label="1111011011 (1) 1111011111" source="9395" target="9227" cy:directed="1"/>
      <edge id="11081" label="1111011011 (1) 1111010011" source="9395" target="9603" cy:directed="1"/>
      <edge id="11080" label="1111011011 (1) 1111001011" source="9395" target="9521" cy:directed="1"/>
      <edge id="11079" label="1111011011 (1) 1111111011" source="9395" target="9210" cy:directed="1"/>
      <edge id="11078" label="1111011011 (1) 1110011011" source="9395" target="9429" cy:directed="1"/>
      <edge id="11077" label="1111011011 (1) 1101011011" source="9395" target="9415" cy:directed="1"/>
      <edge id="11076" label="1111011011 (1) 1011011011" source="9395" target="9409" cy:directed="1"/>
      <edge id="11075" label="1111011101 (1) 1111011111" source="9394" target="9227" cy:directed="1"/>
      <edge id="11074" label="1111011101 (1) 1111001101" source="9394" target="9520" cy:directed="1"/>
      <edge id="11073" label="1111011101 (1) 1111111101" source="9394" target="9307" cy:directed="1"/>
      <edge id="11072" label="1111011101 (1) 1110011101" source="9394" target="9428" cy:directed="1"/>
      <edge id="11071" label="1111011101 (1) 1011011101" source="9394" target="9408" cy:directed="1"/>
      <edge id="11070" label="1000111101 (1) 1000011101" source="9393" target="9458" cy:directed="1"/>
      <edge id="11069" label="1000111101 (1) 1001111101" source="9393" target="9332" cy:directed="1"/>
      <edge id="11068" label="1000111101 (1) 1010111101" source="9393" target="9370" cy:directed="1"/>
      <edge id="11067" label="0000111101 (1) 0000011101" source="9392" target="9456" cy:directed="1"/>
      <edge id="11066" label="0000111101 (1) 0001111101" source="9392" target="9330" cy:directed="1"/>
      <edge id="11065" label="0000111101 (1) 0010111101" source="9392" target="9367" cy:directed="1"/>
      <edge id="11064" label="0010010111 (1) 0010000111" source="9391" target="9494" cy:directed="1"/>
      <edge id="11063" label="0010010111 (1) 0010110111" source="9391" target="9282" cy:directed="1"/>
      <edge id="11062" label="1101101110 (1) 1101101100" source="9390" target="9793" cy:directed="1"/>
      <edge id="11061" label="1101101110 (1) 1101101010" source="9390" target="9708" cy:directed="1"/>
      <edge id="11060" label="1101101110 (1) 1101100110" source="9390" target="9578" cy:directed="1"/>
      <edge id="11059" label="1101101110 (1) 1101111110" source="9390" target="9421" cy:directed="1"/>
      <edge id="11058" label="1101101110 (1) 1111101110" source="9390" target="9363" cy:directed="1"/>
      <edge id="11057" label="1100111101 (1) 1100011101" source="9389" target="9443" cy:directed="1"/>
      <edge id="11056" label="1100111101 (1) 1101111101" source="9389" target="9329" cy:directed="1"/>
      <edge id="11055" label="1100111101 (1) 1110111101" source="9389" target="9361" cy:directed="1"/>
      <edge id="11054" label="1100111101 (1) 1000111101" source="9389" target="9393" cy:directed="1"/>
      <edge id="11053" label="0111100011 (1) 0111100001" source="9388" target="9782" cy:directed="1"/>
      <edge id="11052" label="0111100011 (1) 0111100111" source="9388" target="9299" cy:directed="1"/>
      <edge id="11051" label="0111100011 (1) 0111110011" source="9388" target="9298" cy:directed="1"/>
      <edge id="11050" label="0111100011 (1) 0110100011" source="9388" target="9336" cy:directed="1"/>
      <edge id="11049" label="0111100011 (1) 0101100011" source="9388" target="9400" cy:directed="1"/>
      <edge id="11048" label="0111100011 (1) 0011100011" source="9388" target="9319" cy:directed="1"/>
      <edge id="11047" label="0101101110 (1) 0101101100" source="9387" target="9790" cy:directed="1"/>
      <edge id="11046" label="0101101110 (1) 0101101010" source="9387" target="9703" cy:directed="1"/>
      <edge id="11045" label="0101101110 (1) 0101100110" source="9387" target="9576" cy:directed="1"/>
      <edge id="11044" label="0101101110 (1) 0101111110" source="9387" target="9420" cy:directed="1"/>
      <edge id="11043" label="0101101110 (1) 0111101110" source="9387" target="9362" cy:directed="1"/>
      <edge id="11042" label="0101101110 (1) 0001101110" source="9387" target="9356" cy:directed="1"/>
      <edge id="11041" label="1111100011 (1) 1111100001" source="9386" target="9786" cy:directed="1"/>
      <edge id="11040" label="1111100011 (1) 1111100111" source="9386" target="9295" cy:directed="1"/>
      <edge id="11039" label="1111100011 (1) 1111110011" source="9386" target="9294" cy:directed="1"/>
      <edge id="11038" label="1111100011 (1) 1110100011" source="9386" target="9344" cy:directed="1"/>
      <edge id="11037" label="1111100011 (1) 1101100011" source="9386" target="9402" cy:directed="1"/>
      <edge id="11036" label="1010010111 (1) 1010000111" source="9385" target="9493" cy:directed="1"/>
      <edge id="11035" label="1010010111 (1) 1010110111" source="9385" target="9283" cy:directed="1"/>
      <edge id="11034" label="0100111101 (1) 0100011101" source="9384" target="9448" cy:directed="1"/>
      <edge id="11033" label="0100111101 (1) 0101111101" source="9384" target="9327" cy:directed="1"/>
      <edge id="11032" label="0100111101 (1) 0110111101" source="9384" target="9360" cy:directed="1"/>
      <edge id="11031" label="0100111101 (1) 0000111101" source="9384" target="9392" cy:directed="1"/>
      <edge id="11030" label="1110010111 (1) 1110000111" source="9383" target="9489" cy:directed="1"/>
      <edge id="11029" label="1110010111 (1) 1110110111" source="9383" target="9277" cy:directed="1"/>
      <edge id="11028" label="1110010111 (1) 1010010111" source="9383" target="9385" cy:directed="1"/>
      <edge id="11027" label="0110010111 (1) 0110000111" source="9382" target="9486" cy:directed="1"/>
      <edge id="11026" label="0110010111 (1) 0110110111" source="9382" target="9278" cy:directed="1"/>
      <edge id="11025" label="0110010111 (1) 0010010111" source="9382" target="9391" cy:directed="1"/>
      <edge id="11024" label="0000100011 (1) 0000100001" source="9381" target="9781" cy:directed="1"/>
      <edge id="11023" label="0000100011 (1) 0000100111" source="9381" target="9380" cy:directed="1"/>
      <edge id="11022" label="0000100011 (1) 0000110011" source="9381" target="9379" cy:directed="1"/>
      <edge id="11021" label="0000100011 (1) 0000000011" source="9381" target="9900" cy:directed="1"/>
      <edge id="11020" label="0000100011 (1) 0001100011" source="9381" target="9378" cy:directed="1"/>
      <edge id="11019" label="0000100011 (1) 0010100011" source="9381" target="9377" cy:directed="1"/>
      <edge id="11018" label="0000100111 (1) 0000100101" source="9380" target="9780" cy:directed="1"/>
      <edge id="11017" label="0000100111 (1) 0000110111" source="9380" target="9286" cy:directed="1"/>
      <edge id="11016" label="0000100111 (1) 0001100111" source="9380" target="9321" cy:directed="1"/>
      <edge id="11015" label="0000100111 (1) 0010100111" source="9380" target="9349" cy:directed="1"/>
      <edge id="11014" label="0000110011 (1) 0000110001" source="9379" target="9779" cy:directed="1"/>
      <edge id="11013" label="0000110011 (1) 0000110111" source="9379" target="9286" cy:directed="1"/>
      <edge id="11012" label="0000110011 (1) 0000010011" source="9379" target="9733" cy:directed="1"/>
      <edge id="11011" label="0000110011 (1) 0001110011" source="9379" target="9320" cy:directed="1"/>
      <edge id="11010" label="0000110011 (1) 0010110011" source="9379" target="9348" cy:directed="1"/>
      <edge id="11009" label="0001100011 (1) 0001100001" source="9378" target="9778" cy:directed="1"/>
      <edge id="11008" label="0001100011 (1) 0001100111" source="9378" target="9321" cy:directed="1"/>
      <edge id="11007" label="0001100011 (1) 0001110011" source="9378" target="9320" cy:directed="1"/>
      <edge id="11006" label="0001100011 (1) 0001000011" source="9378" target="9825" cy:directed="1"/>
      <edge id="11005" label="0001100011 (1) 0011100011" source="9378" target="9319" cy:directed="1"/>
      <edge id="11004" label="0010100011 (1) 0010100001" source="9377" target="9777" cy:directed="1"/>
      <edge id="11003" label="0010100011 (1) 0010100111" source="9377" target="9349" cy:directed="1"/>
      <edge id="11002" label="0010100011 (1) 0010110011" source="9377" target="9348" cy:directed="1"/>
      <edge id="11001" label="0010100011 (1) 0010000011" source="9377" target="9855" cy:directed="1"/>
      <edge id="11000" label="1000100011 (1) 1000100001" source="9376" target="9776" cy:directed="1"/>
      <edge id="10999" label="1000100011 (1) 1000100111" source="9376" target="9375" cy:directed="1"/>
      <edge id="10998" label="1000100011 (1) 1000110011" source="9376" target="9374" cy:directed="1"/>
      <edge id="10997" label="1000100011 (1) 1000000011" source="9376" target="9896" cy:directed="1"/>
      <edge id="10996" label="1000100011 (1) 1001100011" source="9376" target="9373" cy:directed="1"/>
      <edge id="10995" label="1000100011 (1) 1010100011" source="9376" target="9372" cy:directed="1"/>
      <edge id="10994" label="1000100011 (1) 1100100011" source="9376" target="9371" cy:directed="1"/>
      <edge id="10993" label="1000100111 (1) 1000100101" source="9375" target="9775" cy:directed="1"/>
      <edge id="10992" label="1000100111 (1) 1000110111" source="9375" target="9287" cy:directed="1"/>
      <edge id="10991" label="1000100111 (1) 1001100111" source="9375" target="9318" cy:directed="1"/>
      <edge id="10990" label="1000100111 (1) 1010100111" source="9375" target="9346" cy:directed="1"/>
      <edge id="10989" label="1000100111 (1) 1100100111" source="9375" target="9369" cy:directed="1"/>
      <edge id="10988" label="1000110011 (1) 1000110001" source="9374" target="9774" cy:directed="1"/>
      <edge id="10987" label="1000110011 (1) 1000110111" source="9374" target="9287" cy:directed="1"/>
      <edge id="10986" label="1000110011 (1) 1000010011" source="9374" target="9738" cy:directed="1"/>
      <edge id="10985" label="1000110011 (1) 1001110011" source="9374" target="9317" cy:directed="1"/>
      <edge id="10984" label="1000110011 (1) 1010110011" source="9374" target="9345" cy:directed="1"/>
      <edge id="10983" label="1001100011 (1) 1001100001" source="9373" target="9773" cy:directed="1"/>
      <edge id="10982" label="1001100011 (1) 1001100111" source="9373" target="9318" cy:directed="1"/>
      <edge id="10981" label="1001100011 (1) 1001110011" source="9373" target="9317" cy:directed="1"/>
      <edge id="10980" label="1001100011 (1) 1001000011" source="9373" target="9820" cy:directed="1"/>
      <edge id="10979" label="1001100011 (1) 1011100011" source="9373" target="9316" cy:directed="1"/>
      <edge id="10978" label="1001100011 (1) 1101100011" source="9373" target="9402" cy:directed="1"/>
      <edge id="10977" label="1010100011 (1) 1010100001" source="9372" target="9772" cy:directed="1"/>
      <edge id="10976" label="1010100011 (1) 1010100111" source="9372" target="9346" cy:directed="1"/>
      <edge id="10975" label="1010100011 (1) 1010110011" source="9372" target="9345" cy:directed="1"/>
      <edge id="10974" label="1010100011 (1) 1010000011" source="9372" target="9859" cy:directed="1"/>
      <edge id="10973" label="1010100011 (1) 1110100011" source="9372" target="9344" cy:directed="1"/>
      <edge id="10972" label="1100100011 (1) 1100100001" source="9371" target="9771" cy:directed="1"/>
      <edge id="10971" label="1100100011 (1) 1100100111" source="9371" target="9369" cy:directed="1"/>
      <edge id="10970" label="1100100011 (1) 1100110011" source="9371" target="9368" cy:directed="1"/>
      <edge id="10969" label="1100100011 (1) 1100000011" source="9371" target="9890" cy:directed="1"/>
      <edge id="10968" label="1100100011 (1) 1101100011" source="9371" target="9402" cy:directed="1"/>
      <edge id="10967" label="1010111101 (1) 1010011101" source="9370" target="9434" cy:directed="1"/>
      <edge id="10966" label="1100100111 (1) 1100100101" source="9369" target="9768" cy:directed="1"/>
      <edge id="10965" label="1100100111 (1) 1100110111" source="9369" target="9285" cy:directed="1"/>
      <edge id="10964" label="1100100111 (1) 1101100111" source="9369" target="9315" cy:directed="1"/>
      <edge id="10963" label="1100100111 (1) 1110100111" source="9369" target="9338" cy:directed="1"/>
      <edge id="10962" label="1100110011 (1) 1100110001" source="9368" target="9767" cy:directed="1"/>
      <edge id="10961" label="1100110011 (1) 1100110111" source="9368" target="9285" cy:directed="1"/>
      <edge id="10960" label="1100110011 (1) 1100010011" source="9368" target="9720" cy:directed="1"/>
      <edge id="10959" label="1100110011 (1) 1101110011" source="9368" target="9314" cy:directed="1"/>
      <edge id="10958" label="1100110011 (1) 1000110011" source="9368" target="9374" cy:directed="1"/>
      <edge id="10957" label="0010111101 (1) 0010011101" source="9367" target="9430" cy:directed="1"/>
      <edge id="10956" label="0100100011 (1) 0100100001" source="9366" target="9766" cy:directed="1"/>
      <edge id="10955" label="0100100011 (1) 0100100111" source="9366" target="9365" cy:directed="1"/>
      <edge id="10954" label="0100100011 (1) 0100110011" source="9366" target="9364" cy:directed="1"/>
      <edge id="10953" label="0100100011 (1) 0100000011" source="9366" target="9886" cy:directed="1"/>
      <edge id="10952" label="0100100011 (1) 0101100011" source="9366" target="9400" cy:directed="1"/>
      <edge id="10951" label="0100100011 (1) 0000100011" source="9366" target="9381" cy:directed="1"/>
      <edge id="10950" label="0100100111 (1) 0100100101" source="9365" target="9765" cy:directed="1"/>
      <edge id="10949" label="0100100111 (1) 0100110111" source="9365" target="9284" cy:directed="1"/>
      <edge id="10948" label="0100100111 (1) 0101100111" source="9365" target="9309" cy:directed="1"/>
      <edge id="10947" label="0100100111 (1) 0110100111" source="9365" target="9335" cy:directed="1"/>
      <edge id="10946" label="0100100111 (1) 0000100111" source="9365" target="9380" cy:directed="1"/>
      <edge id="10945" label="0100110011 (1) 0100110001" source="9364" target="9764" cy:directed="1"/>
      <edge id="10944" label="0100110011 (1) 0100110111" source="9364" target="9284" cy:directed="1"/>
      <edge id="10943" label="0100110011 (1) 0100010011" source="9364" target="9713" cy:directed="1"/>
      <edge id="10942" label="0100110011 (1) 0101110011" source="9364" target="9308" cy:directed="1"/>
      <edge id="10941" label="0100110011 (1) 0000110011" source="9364" target="9379" cy:directed="1"/>
      <edge id="10940" label="1111101110 (1) 1111101100" source="9363" target="9762" cy:directed="1"/>
      <edge id="10939" label="1111101110 (1) 1111101010" source="9363" target="9673" cy:directed="1"/>
      <edge id="10938" label="1111101110 (1) 1111100110" source="9363" target="9553" cy:directed="1"/>
      <edge id="10937" label="1111101110 (1) 1111111110" source="9363" target="9407" cy:directed="1"/>
      <edge id="10936" label="1111101110 (1) 1110101110" source="9363" target="9343" cy:directed="1"/>
      <edge id="10935" label="0111101110 (1) 0111101100" source="9362" target="9760" cy:directed="1"/>
      <edge id="10934" label="0111101110 (1) 0111101010" source="9362" target="9671" cy:directed="1"/>
      <edge id="10933" label="0111101110 (1) 0111100110" source="9362" target="9552" cy:directed="1"/>
      <edge id="10932" label="0111101110 (1) 0111111110" source="9362" target="9403" cy:directed="1"/>
      <edge id="10931" label="0111101110 (1) 0110101110" source="9362" target="9341" cy:directed="1"/>
      <edge id="10930" label="0111101110 (1) 0011101110" source="9362" target="9305" cy:directed="1"/>
      <edge id="10929" label="1110111101 (1) 1110011101" source="9361" target="9428" cy:directed="1"/>
      <edge id="10928" label="1110111101 (1) 1010111101" source="9361" target="9370" cy:directed="1"/>
      <edge id="10927" label="0110111101 (1) 0110011101" source="9360" target="9425" cy:directed="1"/>
      <edge id="10926" label="0110111101 (1) 0010111101" source="9360" target="9367" cy:directed="1"/>
      <edge id="10925" label="1001010111 (1) 1001000111" source="9359" target="9469" cy:directed="1"/>
      <edge id="10924" label="1001010111 (1) 1001110111" source="9359" target="9270" cy:directed="1"/>
      <edge id="10923" label="1001010111 (1) 1011010111" source="9359" target="9328" cy:directed="1"/>
      <edge id="10922" label="0001010111 (1) 0001000111" source="9358" target="9468" cy:directed="1"/>
      <edge id="10921" label="0001010111 (1) 0001110111" source="9358" target="9268" cy:directed="1"/>
      <edge id="10920" label="0001010111 (1) 0011010111" source="9358" target="9326" cy:directed="1"/>
      <edge id="10919" label="0000101110 (1) 0000101100" source="9357" target="9759" cy:directed="1"/>
      <edge id="10918" label="0000101110 (1) 0000101010" source="9357" target="9661" cy:directed="1"/>
      <edge id="10917" label="0000101110 (1) 0000100110" source="9357" target="9676" cy:directed="1"/>
      <edge id="10916" label="0000101110 (1) 0000111110" source="9357" target="9464" cy:directed="1"/>
      <edge id="10915" label="0000101110 (1) 0000001110" source="9357" target="9865" cy:directed="1"/>
      <edge id="10914" label="0000101110 (1) 0001101110" source="9357" target="9356" cy:directed="1"/>
      <edge id="10913" label="0000101110 (1) 0010101110" source="9357" target="9355" cy:directed="1"/>
      <edge id="10912" label="0001101110 (1) 0001101100" source="9356" target="9758" cy:directed="1"/>
      <edge id="10911" label="0001101110 (1) 0001101010" source="9356" target="9659" cy:directed="1"/>
      <edge id="10910" label="0001101110 (1) 0001100110" source="9356" target="9589" cy:directed="1"/>
      <edge id="10909" label="0001101110 (1) 0001111110" source="9356" target="9422" cy:directed="1"/>
      <edge id="10908" label="0001101110 (1) 0001001110" source="9356" target="9801" cy:directed="1"/>
      <edge id="10907" label="0001101110 (1) 0011101110" source="9356" target="9305" cy:directed="1"/>
      <edge id="10906" label="0010101110 (1) 0010101100" source="9355" target="9757" cy:directed="1"/>
      <edge id="10905" label="0010101110 (1) 0010101010" source="9355" target="9658" cy:directed="1"/>
      <edge id="10904" label="0010101110 (1) 0010100110" source="9355" target="9644" cy:directed="1"/>
      <edge id="10903" label="0010101110 (1) 0010111110" source="9355" target="9438" cy:directed="1"/>
      <edge id="10902" label="0010101110 (1) 0010001110" source="9355" target="9830" cy:directed="1"/>
      <edge id="10901" label="1000101110 (1) 1000101100" source="9354" target="9756" cy:directed="1"/>
      <edge id="10900" label="1000101110 (1) 1000101010" source="9354" target="9657" cy:directed="1"/>
      <edge id="10899" label="1000101110 (1) 1000100110" source="9354" target="9677" cy:directed="1"/>
      <edge id="10898" label="1000101110 (1) 1000111110" source="9354" target="9465" cy:directed="1"/>
      <edge id="10897" label="1000101110 (1) 1000001110" source="9354" target="9870" cy:directed="1"/>
      <edge id="10896" label="1000101110 (1) 1001101110" source="9354" target="9353" cy:directed="1"/>
      <edge id="10895" label="1000101110 (1) 1010101110" source="9354" target="9352" cy:directed="1"/>
      <edge id="10894" label="1000101110 (1) 1100101110" source="9354" target="9351" cy:directed="1"/>
      <edge id="10893" label="1001101110 (1) 1001101100" source="9353" target="9755" cy:directed="1"/>
      <edge id="10892" label="1001101110 (1) 1001101010" source="9353" target="9655" cy:directed="1"/>
      <edge id="10891" label="1001101110 (1) 1001100110" source="9353" target="9590" cy:directed="1"/>
      <edge id="10890" label="1001101110 (1) 1001111110" source="9353" target="9423" cy:directed="1"/>
      <edge id="10889" label="1001101110 (1) 1001001110" source="9353" target="9806" cy:directed="1"/>
      <edge id="10888" label="1001101110 (1) 1011101110" source="9353" target="9304" cy:directed="1"/>
      <edge id="10887" label="1001101110 (1) 1101101110" source="9353" target="9390" cy:directed="1"/>
      <edge id="10886" label="1010101110 (1) 1010101100" source="9352" target="9754" cy:directed="1"/>
      <edge id="10885" label="1010101110 (1) 1010101010" source="9352" target="9654" cy:directed="1"/>
      <edge id="10884" label="1010101110 (1) 1010100110" source="9352" target="9646" cy:directed="1"/>
      <edge id="10883" label="1010101110 (1) 1010111110" source="9352" target="9439" cy:directed="1"/>
      <edge id="10882" label="1010101110 (1) 1010001110" source="9352" target="9833" cy:directed="1"/>
      <edge id="10881" label="1010101110 (1) 1110101110" source="9352" target="9343" cy:directed="1"/>
      <edge id="10880" label="1100101110 (1) 1100101100" source="9351" target="9753" cy:directed="1"/>
[truncated: 68,424 more chars]
