# Supplementary material
Source: publisher figshare collection journal article supplement (https://springernature.figshare.com/ndownloader/files/17562821)
Supplement: Supplementary file 1 [file 17562821 › CytoscapeSession-2018_09_25-21_15/networks/14312-STG%2C+Model+1%2C+Fluctuating+Inputs.xgmml]

<?xml version="1.0" encoding="UTF-8" standalone="yes"?>
<graph id="14312" label="STG, Model 1, Fluctuating Inputs" cy:view="0" cy:registered="0" cy:documentVersion="3.0" xmlns:dc="http://purl.org/dc/elements/1.1/" xmlns:xlink="http://www.w3.org/1999/xlink" xmlns:rdf="http://www.w3.org/1999/02/22-rdf-syntax-ns#" xmlns:cy="http://www.cytoscape.org" xmlns="http://www.cs.rpi.edu/XGMML">
  <att>
    <graph id="14328" label="STG, Model 1, Fluctuating Inputs" cy:registered="1">
      <node id="15361" label="0000000000"/>
      <node id="15360" label="0000000001"/>
      <node id="15359" label="0000000010"/>
      <node id="15358" label="0001000000"/>
      <node id="15357" label="1000000000"/>
      <node id="15356" label="1000000001"/>
      <node id="15355" label="1000000010"/>
      <node id="15354" label="1001000000"/>
      <node id="15353" label="1100000000"/>
      <node id="15352" label="0100000000"/>
      <node id="15351" label="0100000001"/>
      <node id="15350" label="0100000010"/>
      <node id="15349" label="0101000000"/>
      <node id="15348" label="1100000001"/>
      <node id="15347" label="1100000010"/>
      <node id="15346" label="1101000000"/>
      <node id="15345" label="1010000000"/>
      <node id="15344" label="1010000001"/>
      <node id="15343" label="1010000010"/>
      <node id="15342" label="1110000000"/>
      <node id="15341" label="0010000000"/>
      <node id="15340" label="0010000001"/>
      <node id="15339" label="0010000010"/>
      <node id="15338" label="1110000001"/>
      <node id="15337" label="1110000010"/>
      <node id="15336" label="0110000000"/>
      <node id="15335" label="0110000001"/>
      <node id="15334" label="0110000010"/>
      <node id="15333" label="1001000001"/>
      <node id="15332" label="1001000010"/>
      <node id="15331" label="0001000001"/>
      <node id="15330" label="0001000010"/>
      <node id="15329" label="1101000001"/>
      <node id="15328" label="1101000010"/>
      <node id="15327" label="1101100000"/>
      <node id="15326" label="0101000001"/>
      <node id="15325" label="0101000010"/>
      <node id="15324" label="0101100000"/>
      <node id="15323" label="0011000000"/>
      <node id="15322" label="0011000001"/>
      <node id="15321" label="0011000010"/>
      <node id="15320" label="1011000000"/>
      <node id="15319" label="1011000001"/>
      <node id="15318" label="1011000010"/>
      <node id="15317" label="1111000000"/>
      <node id="15316" label="1111000001"/>
      <node id="15315" label="1111000010"/>
      <node id="15314" label="1111100000"/>
      <node id="15313" label="0111000000"/>
      <node id="15312" label="0111000001"/>
      <node id="15311" label="0111000010"/>
      <node id="15310" label="0111100000"/>
      <node id="15309" label="1000100000"/>
      <node id="15308" label="1000100001"/>
      <node id="15307" label="1000110000"/>
      <node id="15306" label="1001100000"/>
      <node id="15305" label="1010100000"/>
      <node id="15304" label="1100100000"/>
      <node id="15303" label="0000100000"/>
      <node id="15302" label="0000100001"/>
      <node id="15301" label="0000110000"/>
      <node id="15300" label="0001100000"/>
      <node id="15299" label="0010100000"/>
      <node id="15298" label="0100100000"/>
      <node id="15297" label="0100100001"/>
      <node id="15296" label="0100110000"/>
      <node id="15295" label="1100100001"/>
      <node id="15294" label="1100110000"/>
      <node id="15293" label="0010100001"/>
      <node id="15292" label="0010110000"/>
      <node id="15291" label="1010100001"/>
      <node id="15290" label="1010110000"/>
      <node id="15289" label="1110100000"/>
      <node id="15288" label="1110100001"/>
      <node id="15287" label="1110110000"/>
      <node id="15286" label="0110100000"/>
      <node id="15285" label="0110100001"/>
      <node id="15284" label="0110110000"/>
      <node id="15283" label="0001100001"/>
      <node id="15282" label="0001110000"/>
      <node id="15281" label="0011100000"/>
      <node id="15280" label="1001100001"/>
      <node id="15279" label="1001110000"/>
      <node id="15278" label="1011100000"/>
      <node id="15277" label="1000010000"/>
      <node id="15276" label="1000010001"/>
      <node id="15275" label="1000010010"/>
      <node id="15274" label="1000011000"/>
      <node id="15273" label="1001010000"/>
      <node id="15272" label="0000010000"/>
      <node id="15271" label="0000010001"/>
      <node id="15270" label="0000010010"/>
      <node id="15269" label="0000011000"/>
      <node id="15268" label="0001010000"/>
      <node id="15267" label="1101100001"/>
      <node id="15266" label="1101110000"/>
      <node id="15265" label="0101100001"/>
      <node id="15264" label="0101110000"/>
      <node id="15263" label="1100010000"/>
      <node id="15262" label="1100010001"/>
      <node id="15261" label="1100010010"/>
      <node id="15260" label="1100011000"/>
      <node id="15259" label="1101010000"/>
      <node id="15258" label="0100010000"/>
      <node id="15257" label="0100010001"/>
      <node id="15256" label="0100010010"/>
      <node id="15255" label="0100011000"/>
      <node id="15254" label="0101010000"/>
      <node id="15253" label="0011100001"/>
      <node id="15252" label="0011110000"/>
      <node id="15251" label="1011100001"/>
      <node id="15250" label="1011110000"/>
      <node id="15249" label="1010010000"/>
      <node id="15248" label="1010010001"/>
      <node id="15247" label="1010010010"/>
      <node id="15246" label="1010011000"/>
      <node id="15245" label="0010010000"/>
      <node id="15244" label="0010010001"/>
      <node id="15243" label="0010010010"/>
      <node id="15242" label="0010011000"/>
      <node id="15241" label="1111100001"/>
      <node id="15240" label="1111110000"/>
      <node id="15239" label="0111100001"/>
      <node id="15238" label="0111110000"/>
      <node id="15237" label="0110010000"/>
      <node id="15236" label="0110010001"/>
      <node id="15235" label="0110010010"/>
      <node id="15234" label="0110011000"/>
      <node id="15233" label="1110010000"/>
      <node id="15232" label="1110010001"/>
      <node id="15231" label="1110010010"/>
      <node id="15230" label="1110011000"/>
      <node id="15229" label="0001010001"/>
      <node id="15228" label="0001010010"/>
      <node id="15227" label="0001011000"/>
      <node id="15226" label="1001010001"/>
      <node id="15225" label="1001010010"/>
      <node id="15224" label="1001011000"/>
      <node id="15223" label="0101010001"/>
      <node id="15222" label="0101010010"/>
      <node id="15221" label="0101011000"/>
      <node id="15220" label="1101010001"/>
      <node id="15219" label="1101010010"/>
      <node id="15218" label="1101011000"/>
      <node id="15217" label="1000001000"/>
      <node id="15216" label="1000001001"/>
      <node id="15215" label="1000001010"/>
      <node id="15214" label="1001001000"/>
      <node id="15213" label="1100001000"/>
      <node id="15212" label="0000001000"/>
      <node id="15211" label="0000001001"/>
      <node id="15210" label="0000001010"/>
      <node id="15209" label="0001001000"/>
      <node id="15208" label="1100001001"/>
      <node id="15207" label="1100001010"/>
      <node id="15206" label="1101001000"/>
      <node id="15205" label="0100001000"/>
      <node id="15204" label="0100001001"/>
      <node id="15203" label="0100001010"/>
      <node id="15202" label="0101001000"/>
      <node id="15201" label="0011010000"/>
      <node id="15200" label="0011010001"/>
      <node id="15199" label="0011010010"/>
      <node id="15198" label="0011011000"/>
      <node id="15197" label="1011010000"/>
      <node id="15196" label="1011010001"/>
      <node id="15195" label="1011010010"/>
      <node id="15194" label="1011011000"/>
      <node id="15193" label="0111010000"/>
      <node id="15192" label="0111010001"/>
      <node id="15191" label="0111010010"/>
      <node id="15190" label="0111011000"/>
      <node id="15189" label="1111010000"/>
      <node id="15188" label="1111010001"/>
      <node id="15187" label="1111010010"/>
      <node id="15186" label="1111011000"/>
      <node id="15185" label="1010001000"/>
      <node id="15184" label="1010001001"/>
      <node id="15183" label="1010001010"/>
      <node id="15182" label="1110001000"/>
      <node id="15181" label="0010001000"/>
      <node id="15180" label="0010001001"/>
      <node id="15179" label="0010001010"/>
      <node id="15178" label="1000110001"/>
      <node id="15177" label="1000111000"/>
      <node id="15176" label="0000110001"/>
      <node id="15175" label="0000111000"/>
      <node id="15174" label="1110001001"/>
      <node id="15173" label="1110001010"/>
      <node id="15172" label="0110001000"/>
      <node id="15171" label="0110001001"/>
      <node id="15170" label="0110001010"/>
      <node id="15169" label="0100110001"/>
      <node id="15168" label="0100111000"/>
      <node id="15167" label="1100110001"/>
      <node id="15166" label="1100111000"/>
      <node id="15165" label="0010110001"/>
      <node id="15164" label="0010111000"/>
      <node id="15163" label="1010110001"/>
      <node id="15162" label="1010111000"/>
      <node id="15161" label="0001001001"/>
      <node id="15160" label="0001001010"/>
      <node id="15159" label="1001001001"/>
      <node id="15158" label="1001001010"/>
      <node id="15157" label="1110110001"/>
      <node id="15156" label="1110111000"/>
      <node id="15155" label="0110110001"/>
      <node id="15154" label="0110111000"/>
      <node id="15153" label="0101001001"/>
      <node id="15152" label="0101001010"/>
      <node id="15151" label="0101101000"/>
      <node id="15150" label="1101001001"/>
      <node id="15149" label="1101001010"/>
      <node id="15148" label="1101101000"/>
      <node id="15147" label="0000000100"/>
      <node id="15146" label="0000000101"/>
      <node id="15145" label="0000000110"/>
      <node id="15144" label="0000100100"/>
      <node id="15143" label="0001000100"/>
      <node id="15142" label="0010000100"/>
      <node id="15141" label="1000000100"/>
      <node id="15140" label="1000000101"/>
      <node id="15139" label="1000000110"/>
      <node id="15138" label="1000100100"/>
      <node id="15137" label="1001000100"/>
      <node id="15136" label="1010000100"/>
      <node id="15135" label="1100000100"/>
      <node id="15134" label="0011001000"/>
      <node id="15133" label="0011001001"/>
      <node id="15132" label="0011001010"/>
      <node id="15131" label="1011001000"/>
      <node id="15130" label="1011001001"/>
      <node id="15129" label="1011001010"/>
      <node id="15128" label="1111001000"/>
      <node id="15127" label="0001110001"/>
      <node id="15126" label="0001111000"/>
      <node id="15125" label="1001110001"/>
      <node id="15124" label="1001111000"/>
      <node id="15123" label="1100000101"/>
      <node id="15122" label="1100000110"/>
      <node id="15121" label="1100100100"/>
      <node id="15120" label="1101000100"/>
      <node id="15119" label="0100000100"/>
      <node id="15118" label="0100000101"/>
      <node id="15117" label="0100000110"/>
      <node id="15116" label="0100100100"/>
      <node id="15115" label="0101000100"/>
      <node id="15114" label="1111001001"/>
      <node id="15113" label="1111001010"/>
      <node id="15112" label="1111101000"/>
      <node id="15111" label="0111001000"/>
      <node id="15110" label="0111001001"/>
      <node id="15109" label="0111001010"/>
      <node id="15108" label="0111101000"/>
      <node id="15107" label="1101110001"/>
      <node id="15106" label="1101111000"/>
      <node id="15105" label="0101110001"/>
      <node id="15104" label="0101111000"/>
      <node id="15103" label="0000101000"/>
      <node id="15102" label="0000101001"/>
      <node id="15101" label="0001101000"/>
      <node id="15100" label="0010101000"/>
      <node id="15099" label="1000101000"/>
      <node id="15098" label="1000101001"/>
      <node id="15097" label="1001101000"/>
      <node id="15096" label="1010101000"/>
      <node id="15095" label="1100101000"/>
      <node id="15094" label="1010000101"/>
      <node id="15093" label="1010000110"/>
      <node id="15092" label="1010100100"/>
      <node id="15091" label="1110000100"/>
      <node id="15090" label="0010000101"/>
      <node id="15089" label="0010000110"/>
      <node id="15088" label="0010100100"/>
      <node id="15087" label="0100101000"/>
      <node id="15086" label="0100101001"/>
      <node id="15085" label="1100101001"/>
      <node id="15084" label="0011110001"/>
      <node id="15083" label="0011111000"/>
      <node id="15082" label="1011110001"/>
      <node id="15081" label="1011111000"/>
      <node id="15080" label="1110000101"/>
      <node id="15079" label="1110000110"/>
      <node id="15078" label="1110100100"/>
      <node id="15077" label="0110000100"/>
      <node id="15076" label="0110000101"/>
      <node id="15075" label="0110000110"/>
      <node id="15074" label="0110100100"/>
      <node id="15073" label="1111110001"/>
      <node id="15072" label="1111111000"/>
      <node id="15071" label="0111110001"/>
      <node id="15070" label="0111111000"/>
      <node id="15069" label="0010101001"/>
      <node id="15068" label="1010101001"/>
      <node id="15067" label="1110101000"/>
      <node id="15066" label="1110101001"/>
      <node id="15065" label="0110101000"/>
      <node id="15064" label="0110101001"/>
      <node id="15063" label="0001000101"/>
      <node id="15062" label="0001000110"/>
      <node id="15061" label="0001100100"/>
      <node id="15060" label="0011000100"/>
      <node id="15059" label="1001000101"/>
      <node id="15058" label="1001000110"/>
      <node id="15057" label="1001100100"/>
      <node id="15056" label="1011000100"/>
      <node id="15055" label="1101000101"/>
      <node id="15054" label="1101000110"/>
      <node id="15053" label="1101100100"/>
      <node id="15052" label="0101000101"/>
      <node id="15051" label="0101000110"/>
      <node id="15050" label="0101100100"/>
      <node id="15049" label="0001101001"/>
      <node id="15048" label="0011101000"/>
      <node id="15047" label="1001101001"/>
      <node id="15046" label="1011101000"/>
      <node id="15045" label="0000011001"/>
      <node id="15044" label="0000011010"/>
      <node id="15043" label="0000011100"/>
      <node id="15042" label="1000011001"/>
      <node id="15041" label="1000011010"/>
      <node id="15040" label="1000011100"/>
      <node id="15039" label="0011000101"/>
      <node id="15038" label="0011000110"/>
      <node id="15037" label="0011100100"/>
      <node id="15036" label="1101101001"/>
      <node id="15035" label="0101101001"/>
      <node id="15034" label="1011000101"/>
      <node id="15033" label="1011000110"/>
      <node id="15032" label="1011100100"/>
      <node id="15031" label="1111000100"/>
      <node id="15030" label="0100011001"/>
      <node id="15029" label="0100011010"/>
      <node id="15028" label="0100011100"/>
      <node id="15027" label="1100011001"/>
      <node id="15026" label="1100011010"/>
      <node id="15025" label="1100011100"/>
      <node id="15024" label="1111000101"/>
      <node id="15023" label="1111000110"/>
      <node id="15022" label="1111100100"/>
      <node id="15021" label="0111000100"/>
      <node id="15020" label="0111000101"/>
      <node id="15019" label="0111000110"/>
      <node id="15018" label="0111100100"/>
      <node id="15017" label="0000000011"/>
      <node id="15016" label="1000000011"/>
      <node id="15015" label="1000100101"/>
      <node id="15014" label="1000110100"/>
      <node id="15013" label="1100000011"/>
      <node id="15012" label="0100000011"/>
      <node id="15011" label="0000100101"/>
      <node id="15010" label="0000110100"/>
      <node id="15009" label="0011101001"/>
      <node id="15008" label="1011101001"/>
      <node id="15007" label="0010011001"/>
      <node id="15006" label="0010011010"/>
      <node id="15005" label="0010011100"/>
      <node id="15004" label="1010011001"/>
      <node id="15003" label="1010011010"/>
      <node id="15002" label="1010011100"/>
      <node id="15001" label="0100100101"/>
      <node id="15000" label="0100110100"/>
      <node id="14999" label="1110011001"/>
      <node id="14998" label="1110011010"/>
      <node id="14997" label="1110011100"/>
      <node id="14996" label="1100100101"/>
      <node id="14995" label="1100110100"/>
      <node id="14994" label="0110011001"/>
      <node id="14993" label="0110011010"/>
      <node id="14992" label="0110011100"/>
      <node id="14991" label="1111101001"/>
      <node id="14990" label="0111101001"/>
      <node id="14989" label="0010000011"/>
      <node id="14988" label="1010000011"/>
      <node id="14987" label="0010100101"/>
      <node id="14986" label="0010110100"/>
      <node id="14985" label="1110000011"/>
      <node id="14984" label="1010100101"/>
      <node id="14983" label="1010110100"/>
      <node id="14982" label="0110000011"/>
      <node id="14981" label="1110100101"/>
      <node id="14980" label="1110110100"/>
      <node id="14979" label="0110100101"/>
      <node id="14978" label="0110110100"/>
      <node id="14977" label="0001011001"/>
      <node id="14976" label="0001011010"/>
      <node id="14975" label="0001011100"/>
      <node id="14974" label="1001011001"/>
      <node id="14973" label="1001011010"/>
      <node id="14972" label="1001011100"/>
      <node id="14971" label="0101011001"/>
      <node id="14970" label="0101011010"/>
      <node id="14969" label="0101011100"/>
      <node id="14968" label="1101011001"/>
      <node id="14967" label="1101011010"/>
      <node id="14966" label="1101011100"/>
      <node id="14965" label="0001000011"/>
      <node id="14964" label="1001000011"/>
      <node id="14963" label="0001100101"/>
      <node id="14962" label="0001110100"/>
      <node id="14961" label="1101000011"/>
      <node id="14960" label="1101100010"/>
      <node id="14959" label="1001100101"/>
      <node id="14958" label="1001110100"/>
      <node id="14957" label="0101000011"/>
      <node id="14956" label="0101100010"/>
      <node id="14955" label="0000010100"/>
      <node id="14954" label="0000010101"/>
      <node id="14953" label="0000010110"/>
      <node id="14952" label="0001010100"/>
      <node id="14951" label="0010010100"/>
      <node id="14950" label="1000010100"/>
      <node id="14949" label="0011011001"/>
      <node id="14948" label="0011011010"/>
      <node id="14947" label="0011011100"/>
      <node id="14946" label="1011011001"/>
      <node id="14945" label="1011011010"/>
      <node id="14944" label="1011011100"/>
      <node id="14943" label="1000010101"/>
      <node id="14942" label="1000010110"/>
      <node id="14941" label="1001010100"/>
      <node id="14940" label="1010010100"/>
      <node id="14939" label="1101100101"/>
      <node id="14938" label="1101110100"/>
      <node id="14937" label="0101100101"/>
      <node id="14936" label="0101110100"/>
      <node id="14935" label="0100010100"/>
      <node id="14934" label="0100010101"/>
      <node id="14933" label="0100010110"/>
      <node id="14932" label="0101010100"/>
      <node id="14931" label="1100010100"/>
      <node id="14930" label="1100010101"/>
      <node id="14929" label="1100010110"/>
      <node id="14928" label="1101010100"/>
      <node id="14927" label="1111011001"/>
      <node id="14926" label="1111011010"/>
      <node id="14925" label="1111011100"/>
      <node id="14924" label="0111011001"/>
      <node id="14923" label="0111011010"/>
      <node id="14922" label="0111011100"/>
      <node id="14921" label="0011000011"/>
      <node id="14920" label="1000111001"/>
      <node id="14919" label="1000111100"/>
      <node id="14918" label="1011000011"/>
      <node id="14917" label="0000111001"/>
      <node id="14916" label="0000111100"/>
      <node id="14915" label="1111000011"/>
      <node id="14914" label="1111100010"/>
      <node id="14913" label="0100111001"/>
      <node id="14912" label="0100111100"/>
      <node id="14911" label="0011100101"/>
      <node id="14910" label="0011110100"/>
      <node id="14909" label="1011100101"/>
      <node id="14908" label="1011110100"/>
      <node id="14907" label="1100111001"/>
      <node id="14906" label="1100111100"/>
      <node id="14905" label="0111000011"/>
      <node id="14904" label="0111100010"/>
      <node id="14903" label="1010010101"/>
      <node id="14902" label="1010010110"/>
      <node id="14901" label="0010010101"/>
      <node id="14900" label="0010010110"/>
      <node id="14899" label="1111100101"/>
      <node id="14898" label="1111110100"/>
      <node id="14897" label="0111100101"/>
      <node id="14896" label="0111110100"/>
      <node id="14895" label="0110010100"/>
      <node id="14894" label="0110010101"/>
      <node id="14893" label="0110010110"/>
      <node id="14892" label="1110010100"/>
      <node id="14891" label="1110010101"/>
      <node id="14890" label="1110010110"/>
      <node id="14889" label="0000100010"/>
      <node id="14888" label="0000100011"/>
      <node id="14887" label="0000110010"/>
      <node id="14886" label="0001100010"/>
      <node id="14885" label="0010100010"/>
      <node id="14884" label="1000100010"/>
      <node id="14883" label="1000100011"/>
      <node id="14882" label="1000110010"/>
      <node id="14881" label="1001100010"/>
      <node id="14880" label="1010100010"/>
      <node id="14879" label="1100100010"/>
      <node id="14878" label="0010111001"/>
      <node id="14877" label="0010111100"/>
      <node id="14876" label="1010111001"/>
      <node id="14875" label="1010111100"/>
      <node id="14874" label="1100100011"/>
      <node id="14873" label="1100110010"/>
      <node id="14872" label="0100100010"/>
      <node id="14871" label="0100100011"/>
      <node id="14870" label="0100110010"/>
      <node id="14869" label="1110111001"/>
      <node id="14868" label="1110111100"/>
      <node id="14867" label="0110111001"/>
      <node id="14866" label="0110111100"/>
      <node id="14865" label="1001010101"/>
      <node id="14864" label="1001010110"/>
      <node id="14863" label="1011010100"/>
      <node id="14862" label="0001010101"/>
      <node id="14861" label="0001010110"/>
      <node id="14860" label="0011010100"/>
      <node id="14859" label="0010100011"/>
      <node id="14858" label="0010110010"/>
      <node id="14857" label="1010100011"/>
      <node id="14856" label="1010110010"/>
      <node id="14855" label="1110100010"/>
      <node id="14854" label="0101010101"/>
      <node id="14853" label="0101010110"/>
      <node id="14852" label="1101010101"/>
      <node id="14851" label="1101010110"/>
      <node id="14850" label="0000001100"/>
      <node id="14849" label="0000001101"/>
      <node id="14848" label="0000001110"/>
      <node id="14847" label="0001001100"/>
      <node id="14846" label="0010001100"/>
      <node id="14845" label="1000001100"/>
      <node id="14844" label="1000001101"/>
      <node id="14843" label="1000001110"/>
      <node id="14842" label="1001001100"/>
      <node id="14841" label="1010001100"/>
      <node id="14840" label="1100001100"/>
      <node id="14839" label="1110100011"/>
      <node id="14838" label="1110110010"/>
      <node id="14837" label="0110100010"/>
      <node id="14836" label="0110100011"/>
      <node id="14835" label="0110110010"/>
      <node id="14834" label="0001111001"/>
      <node id="14833" label="0001111100"/>
      <node id="14832" label="1001111001"/>
      <node id="14831" label="1001111100"/>
      <node id="14830" label="1100001101"/>
      <node id="14829" label="1100001110"/>
      <node id="14828" label="1101001100"/>
      <node id="14827" label="0100001100"/>
      <node id="14826" label="0100001101"/>
      <node id="14825" label="0100001110"/>
      <node id="14824" label="0101001100"/>
      <node id="14823" label="1101111001"/>
      <node id="14822" label="1101111100"/>
      <node id="14821" label="0101111001"/>
      <node id="14820" label="0101111100"/>
      <node id="14819" label="1011010101"/>
      <node id="14818" label="1011010110"/>
      <node id="14817" label="0011010101"/>
      <node id="14816" label="0011010110"/>
      <node id="14815" label="0111010100"/>
      <node id="14814" label="0111010101"/>
      <node id="14813" label="0111010110"/>
      <node id="14812" label="1111010100"/>
      <node id="14811" label="1111010101"/>
      <node id="14810" label="1111010110"/>
      <node id="14809" label="0000010011"/>
      <node id="14808" label="1000010011"/>
      <node id="14807" label="0001100011"/>
      <node id="14806" label="0001110010"/>
      <node id="14805" label="0011100010"/>
      <node id="14804" label="1010001101"/>
      <node id="14803" label="1010001110"/>
      <node id="14802" label="1110001100"/>
      <node id="14801" label="0010001101"/>
      <node id="14800" label="0010001110"/>
      <node id="14799" label="1001100011"/>
      <node id="14798" label="1001110010"/>
      <node id="14797" label="1011100010"/>
      <node id="14796" label="1000110101"/>
      <node id="14795" label="0011111001"/>
      <node id="14794" label="0011111100"/>
      <node id="14793" label="1011111001"/>
      <node id="14792" label="1011111100"/>
      <node id="14791" label="0100010011"/>
      <node id="14790" label="0000110101"/>
      <node id="14789" label="1100010011"/>
      <node id="14788" label="0101100011"/>
      <node id="14787" label="0101110010"/>
      <node id="14786" label="1101100011"/>
      <node id="14785" label="1101110010"/>
      <node id="14784" label="1110001101"/>
      <node id="14783" label="1110001110"/>
      <node id="14782" label="0110001100"/>
      <node id="14781" label="0110001101"/>
      <node id="14780" label="0110001110"/>
      <node id="14779" label="0100110101"/>
      <node id="14778" label="1100110101"/>
      <node id="14777" label="0111111001"/>
      <node id="14776" label="0111111100"/>
      <node id="14775" label="1111111001"/>
      <node id="14774" label="1111111100"/>
      <node id="14773" label="1010010011"/>
      <node id="14772" label="0010010011"/>
      <node id="14771" label="0011100011"/>
      <node id="14770" label="0011110010"/>
      <node id="14769" label="1011100011"/>
      <node id="14768" label="1011110010"/>
      <node id="14767" label="1010110101"/>
      <node id="14766" label="0010110101"/>
      <node id="14765" label="1111100011"/>
      <node id="14764" label="1111110010"/>
      <node id="14763" label="1110010011"/>
      <node id="14762" label="0001001101"/>
      <node id="14761" label="0001001110"/>
      <node id="14760" label="0011001100"/>
      <node id="14759" label="0110010011"/>
      <node id="14758" label="0111100011"/>
      <node id="14757" label="0111110010"/>
      <node id="14756" label="1001001101"/>
      <node id="14755" label="1001001110"/>
      <node id="14754" label="1011001100"/>
      <node id="14753" label="1101001101"/>
      <node id="14752" label="1101001110"/>
      <node id="14751" label="1101101100"/>
      <node id="14750" label="0101001101"/>
      <node id="14749" label="0101001110"/>
      <node id="14748" label="0101101100"/>
      <node id="14747" label="0110110101"/>
      <node id="14746" label="1110110101"/>
      <node id="14745" label="1001010011"/>
      <node id="14744" label="0001010011"/>
      <node id="14743" label="1011001101"/>
      <node id="14742" label="1011001110"/>
      <node id="14741" label="1111001100"/>
      <node id="14740" label="0011001101"/>
      <node id="14739" label="0011001110"/>
      <node id="14738" label="0001110101"/>
      <node id="14737" label="1001110101"/>
      <node id="14736" label="0101010011"/>
      <node id="14735" label="1101010011"/>
      <node id="14734" label="1111001101"/>
      <node id="14733" label="1111001110"/>
      <node id="14732" label="1111101100"/>
      <node id="14731" label="0111001100"/>
      <node id="14730" label="0111001101"/>
      <node id="14729" label="0111001110"/>
      <node id="14728" label="0111101100"/>
      <node id="14727" label="0101110101"/>
      <node id="14726" label="1101110101"/>
      <node id="14725" label="0000001011"/>
      <node id="14724" label="1000001011"/>
      <node id="14723" label="1100001011"/>
      <node id="14722" label="0100001011"/>
      <node id="14721" label="1000101100"/>
      <node id="14720" label="1000101101"/>
      <node id="14719" label="1001101100"/>
      <node id="14718" label="1010101100"/>
      <node id="14717" label="1100101100"/>
      <node id="14716" label="0000101100"/>
      <node id="14715" label="0000101101"/>
      <node id="14714" label="0001101100"/>
      <node id="14713" label="0010101100"/>
      <node id="14712" label="0011010011"/>
      <node id="14711" label="1011010011"/>
      <node id="14710" label="0100101100"/>
      <node id="14709" label="0100101101"/>
      <node id="14708" label="1100101101"/>
      <node id="14707" label="0011110101"/>
      <node id="14706" label="1011110101"/>
      <node id="14705" label="0111010011"/>
      <node id="14704" label="1111010011"/>
      <node id="14703" label="1111110101"/>
      <node id="14702" label="0010001011"/>
      <node id="14701" label="1010001011"/>
      <node id="14700" label="0111110101"/>
      <node id="14699" label="0000110011"/>
      <node id="14698" label="1000110011"/>
      <node id="14697" label="0110001011"/>
      <node id="14696" label="1110001011"/>
      <node id="14695" label="0010101101"/>
      <node id="14694" label="1010101101"/>
      <node id="14693" label="1110101100"/>
      <node id="14692" label="1110101101"/>
      <node id="14691" label="0110101100"/>
      <node id="14690" label="0110101101"/>
      <node id="14689" label="1100110011"/>
      <node id="14688" label="0100110011"/>
      <node id="14687" label="0010110011"/>
      <node id="14686" label="1010110011"/>
      <node id="14685" label="1001001011"/>
      <node id="14684" label="0001001011"/>
      <node id="14683" label="0001101101"/>
      <node id="14682" label="0011101100"/>
      <node id="14681" label="1000011101"/>
      <node id="14680" label="1000011110"/>
      <node id="14679" label="0000011101"/>
      <node id="14678" label="0000011110"/>
      <node id="14677" label="1101001011"/>
      <node id="14676" label="1101101010"/>
      <node id="14675" label="0101001011"/>
      <node id="14674" label="0101101010"/>
      <node id="14673" label="1001101101"/>
      <node id="14672" label="1011101100"/>
      <node id="14671" label="1110110011"/>
      <node id="14670" label="0110110011"/>
      <node id="14669" label="0100011101"/>
      <node id="14668" label="0100011110"/>
      <node id="14667" label="1100011101"/>
      <node id="14666" label="1100011110"/>
      <node id="14665" label="0101101101"/>
      <node id="14664" label="1101101101"/>
      <node id="14663" label="1000000111"/>
      <node id="14662" label="1000100110"/>
      <node id="14661" label="0000000111"/>
      <node id="14660" label="0000100110"/>
      <node id="14659" label="0011001011"/>
      <node id="14658" label="1011001011"/>
      <node id="14657" label="1111001011"/>
      <node id="14656" label="1111101010"/>
      <node id="14655" label="0010011101"/>
      <node id="14654" label="0010011110"/>
      <node id="14653" label="0111001011"/>
      <node id="14652" label="0111101010"/>
      <node id="14651" label="1010011101"/>
      <node id="14650" label="1010011110"/>
      <node id="14649" label="1001110011"/>
      <node id="14648" label="0100000111"/>
      <node id="14647" label="0100100110"/>
      <node id="14646" label="0001110011"/>
      <node id="14645" label="1100000111"/>
      <node id="14644" label="1100100110"/>
      <node id="14643" label="1011101101"/>
      <node id="14642" label="0011101101"/>
      <node id="14641" label="1101110011"/>
      <node id="14640" label="1110011101"/>
      <node id="14639" label="1110011110"/>
      <node id="14638" label="0101110011"/>
      <node id="14637" label="0110011101"/>
      <node id="14636" label="0110011110"/>
      <node id="14635" label="1111101101"/>
      <node id="14634" label="0111101101"/>
      <node id="14633" label="0000101010"/>
      <node id="14632" label="0000101011"/>
      <node id="14631" label="0000111010"/>
      <node id="14630" label="0001101010"/>
      <node id="14629" label="0010101010"/>
      <node id="14628" label="1000101010"/>
      <node id="14627" label="1000101011"/>
      <node id="14626" label="1000111010"/>
      <node id="14625" label="1001101010"/>
      <node id="14624" label="1010101010"/>
      <node id="14623" label="1100101010"/>
      <node id="14622" label="0010000111"/>
      <node id="14621" label="0010100110"/>
      <node id="14620" label="1010000111"/>
      <node id="14619" label="1010100110"/>
      <node id="14618" label="1100101011"/>
      <node id="14617" label="1100111010"/>
      <node id="14616" label="0100101010"/>
      <node id="14615" label="0100101011"/>
      <node id="14614" label="0100111010"/>
      <node id="14613" label="1011110011"/>
      <node id="14612" label="1110000111"/>
      <node id="14611" label="1110100110"/>
      <node id="14610" label="0011110011"/>
      <node id="14609" label="0110000111"/>
      <node id="14608" label="0110100110"/>
      <node id="14607" label="0001011101"/>
      <node id="14606" label="0001011110"/>
      <node id="14605" label="1001011101"/>
      <node id="14604" label="1001011110"/>
      <node id="14603" label="1111110011"/>
      <node id="14602" label="0111110011"/>
      <node id="14601" label="1010101011"/>
      <node id="14600" label="1010111010"/>
      <node id="14599" label="1110101010"/>
      <node id="14598" label="0010101011"/>
      <node id="14597" label="0010111010"/>
      <node id="14596" label="0101011101"/>
      <node id="14595" label="0101011110"/>
      <node id="14594" label="1101011101"/>
      <node id="14593" label="1101011110"/>
      <node id="14592" label="1110101011"/>
      <node id="14591" label="1110111010"/>
      <node id="14590" label="0110101010"/>
      <node id="14589" label="0110101011"/>
      <node id="14588" label="0110111010"/>
      <node id="14587" label="0001000111"/>
      <node id="14586" label="0001100110"/>
      <node id="14585" label="1001000111"/>
      <node id="14584" label="1001100110"/>
      <node id="14583" label="0011011101"/>
      <node id="14582" label="0011011110"/>
      <node id="14581" label="1101000111"/>
      <node id="14580" label="1101100110"/>
      <node id="14579" label="1011011101"/>
      <node id="14578" label="1011011110"/>
      <node id="14577" label="0101000111"/>
      <node id="14576" label="0101100110"/>
      <node id="14575" label="0111011101"/>
      <node id="14574" label="0111011110"/>
      <node id="14573" label="1111011101"/>
      <node id="14572" label="1111011110"/>
      <node id="14571" label="0000011011"/>
      <node id="14570" label="1000011011"/>
      <node id="14569" label="0001101011"/>
      <node id="14568" label="0001111010"/>
      <node id="14567" label="0011101010"/>
      <node id="14566" label="1001101011"/>
      <node id="14565" label="1001111010"/>
      <node id="14564" label="1011101010"/>
      <node id="14563" label="1011000111"/>
      <node id="14562" label="1011100110"/>
      <node id="14561" label="1000111101"/>
      <node id="14560" label="0000111101"/>
      <node id="14559" label="0011000111"/>
      <node id="14558" label="0011100110"/>
      <node id="14557" label="0100011011"/>
      <node id="14556" label="1101101011"/>
      <node id="14555" label="1101111010"/>
      <node id="14554" label="1100011011"/>
      <node id="14553" label="0101101011"/>
      <node id="14552" label="0101111010"/>
      <node id="14551" label="0100111101"/>
      <node id="14550" label="1100111101"/>
      <node id="14549" label="1111000111"/>
      <node id="14548" label="1111100110"/>
      <node id="14547" label="0111000111"/>
      <node id="14546" label="0111100110"/>
      <node id="14545" label="1000100111"/>
      <node id="14544" label="1000110110"/>
      <node id="14543" label="0000100111"/>
      <node id="14542" label="0000110110"/>
      <node id="14541" label="0010011011"/>
      <node id="14540" label="1010011011"/>
      <node id="14539" label="0011101011"/>
      <node id="14538" label="0011111010"/>
      <node id="14537" label="1011101011"/>
      <node id="14536" label="1011111010"/>
      <node id="14535" label="0010111101"/>
      <node id="14534" label="1010111101"/>
      <node id="14533" label="0100100111"/>
      <node id="14532" label="0100110110"/>
      <node id="14531" label="1110011011"/>
      <node id="14530" label="1100100111"/>
      <node id="14529" label="1100110110"/>
      <node id="14528" label="0110011011"/>
      <node id="14527" label="1111101011"/>
      <node id="14526" label="1111111010"/>
      <node id="14525" label="0111101011"/>
      <node id="14524" label="0111111010"/>
      <node id="14523" label="1110111101"/>
      <node id="14522" label="0110111101"/>
      <node id="14521" label="0010100111"/>
      <node id="14520" label="0010110110"/>
      <node id="14519" label="1010100111"/>
      <node id="14518" label="1010110110"/>
      <node id="14517" label="0110100111"/>
      <node id="14516" label="0110110110"/>
      <node id="14515" label="0001011011"/>
      <node id="14514" label="1001011011"/>
      <node id="14513" label="1110100111"/>
      <node id="14512" label="1110110110"/>
      <node id="14511" label="0001111101"/>
      <node id="14510" label="1001111101"/>
      <node id="14509" label="1101011011"/>
      <node id="14508" label="0101011011"/>
      <node id="14507" label="1101111101"/>
      <node id="14506" label="0101111101"/>
      <node id="14505" label="0001100111"/>
      <node id="14504" label="0001110110"/>
      <node id="14503" label="1000010111"/>
      <node id="14502" label="0000010111"/>
      <node id="14501" label="1001100111"/>
      <node id="14500" label="1001110110"/>
      <node id="14499" label="0011011011"/>
      <node id="14498" label="1011011011"/>
      <node id="14497" label="0011111101"/>
      <node id="14496" label="1101100111"/>
      <node id="14495" label="1101110110"/>
      <node id="14494" label="1011111101"/>
      <node id="14493" label="0100010111"/>
      <node id="14492" label="1100010111"/>
      <node id="14491" label="0101100111"/>
      <node id="14490" label="0101110110"/>
      <node id="14489" label="0111011011"/>
      <node id="14488" label="1111011011"/>
      <node id="14487" label="1111111101"/>
      <node id="14486" label="0111111101"/>
      <node id="14485" label="1000111011"/>
      <node id="14484" label="1000111110"/>
      <node id="14483" label="0000111011"/>
      <node id="14482" label="0000111110"/>
      <node id="14481" label="0011100111"/>
      <node id="14480" label="0011110110"/>
      <node id="14479" label="0010010111"/>
      <node id="14478" label="1010010111"/>
      <node id="14477" label="1100111011"/>
      <node id="14476" label="1100111110"/>
      <node id="14475" label="0100111011"/>
      <node id="14474" label="0100111110"/>
      <node id="14473" label="1011100111"/>
      <node id="14472" label="1011110110"/>
      <node id="14471" label="1110010111"/>
      <node id="14470" label="1111100111"/>
      <node id="14469" label="1111110110"/>
      <node id="14468" label="0110010111"/>
      <node id="14467" label="0111100111"/>
      <node id="14466" label="0111110110"/>
      <node id="14465" label="1010111011"/>
      <node id="14464" label="1010111110"/>
      <node id="14463" label="0010111011"/>
      <node id="14462" label="0010111110"/>
      <node id="14461" label="1110111011"/>
      <node id="14460" label="1110111110"/>
      <node id="14459" label="0110111011"/>
      <node id="14458" label="0110111110"/>
      <node id="14457" label="0001010111"/>
      <node id="14456" label="1001010111"/>
      <node id="14455" label="1101010111"/>
      <node id="14454" label="0101010111"/>
      <node id="14453" label="0000001111"/>
      <node id="14452" label="1000001111"/>
      <node id="14451" label="1100001111"/>
      <node id="14450" label="0100001111"/>
      <node id="14449" label="0001111011"/>
      <node id="14448" label="0001111110"/>
      <node id="14447" label="1001111011"/>
      <node id="14446" label="1001111110"/>
      <node id="14445" label="0011010111"/>
      <node id="14444" label="1011010111"/>
      <node id="14443" label="0101111011"/>
      <node id="14442" label="0101111110"/>
      <node id="14441" label="1101111011"/>
      <node id="14440" label="1101111110"/>
      <node id="14439" label="1111010111"/>
      <node id="14438" label="0111010111"/>
      <node id="14437" label="0010001111"/>
      <node id="14436" label="1010001111"/>
      <node id="14435" label="1000110111"/>
      <node id="14434" label="0000110111"/>
      <node id="14433" label="0011111011"/>
      <node id="14432" label="0011111110"/>
      <node id="14431" label="1110001111"/>
      <node id="14430" label="0110001111"/>
      <node id="14429" label="1011111011"/>
      <node id="14428" label="1011111110"/>
      <node id="14427" label="0111111011"/>
      <node id="14426" label="0111111110"/>
      <node id="14425" label="0100110111"/>
      <node id="14424" label="1111111011"/>
      <node id="14423" label="1111111110"/>
      <node id="14422" label="1100110111"/>
      <node id="14421" label="0010110111"/>
      <node id="14420" label="1010110111"/>
      <node id="14419" label="0001001111"/>
      <node id="14418" label="1001001111"/>
      <node id="14417" label="0101001111"/>
      <node id="14416" label="0101101110"/>
      <node id="14415" label="1101001111"/>
      <node id="14414" label="1101101110"/>
      <node id="14413" label="0110110111"/>
      <node id="14412" label="1110110111"/>
      <node id="14411" label="0011001111"/>
      <node id="14410" label="1011001111"/>
      <node id="14409" label="0001110111"/>
      <node id="14408" label="1001110111"/>
      <node id="14407" label="1111001111"/>
      <node id="14406" label="1111101110"/>
      <node id="14405" label="0111001111"/>
      <node id="14404" label="0111101110"/>
      <node id="14403" label="1101110111"/>
      <node id="14402" label="0101110111"/>
      <node id="14401" label="0000101110"/>
      <node id="14400" label="0000101111"/>
      <node id="14399" label="0001101110"/>
      <node id="14398" label="0010101110"/>
      <node id="14397" label="1000101110"/>
      <node id="14396" label="1000101111"/>
      <node id="14395" label="1001101110"/>
      <node id="14394" label="1010101110"/>
      <node id="14393" label="1100101110"/>
      <node id="14392" label="1100101111"/>
      <node id="14391" label="0100101110"/>
      <node id="14390" label="0100101111"/>
      <node id="14389" label="0011110111"/>
      <node id="14388" label="1011110111"/>
      <node id="14387" label="1111110111"/>
      <node id="14386" label="0111110111"/>
      <node id="14385" label="0010101111"/>
      <node id="14384" label="1010101111"/>
      <node id="14383" label="1110101110"/>
      <node id="14382" label="1110101111"/>
      <node id="14381" label="0110101110"/>
      <node id="14380" label="0110101111"/>
      <node id="14379" label="1000011111"/>
      <node id="14378" label="0000011111"/>
      <node id="14377" label="1001101111"/>
      <node id="14376" label="1011101110"/>
      <node id="14375" label="0001101111"/>
      <node id="14374" label="0011101110"/>
      <node id="14373" label="0100011111"/>
      <node id="14372" label="1100011111"/>
      <node id="14371" label="1101101111"/>
      <node id="14370" label="0101101111"/>
      <node id="14369" label="0010011111"/>
      <node id="14368" label="1010011111"/>
      <node id="14367" label="0011101111"/>
      <node id="14366" label="1011101111"/>
      <node id="14365" label="1110011111"/>
      <node id="14364" label="0110011111"/>
      <node id="14363" label="1111101111"/>
      <node id="14362" label="0111101111"/>
      <node id="14361" label="0001011111"/>
      <node id="14360" label="1001011111"/>
      <node id="14359" label="1101011111"/>
      <node id="14358" label="0101011111"/>
      <node id="14357" label="0011011111"/>
      <node id="14356" label="1011011111"/>
      <node id="14355" label="0111011111"/>
      <node id="14354" label="1111011111"/>
      <node id="14353" label="1000111111"/>
      <node id="14352" label="0000111111"/>
      <node id="14351" label="0100111111"/>
      <node id="14350" label="1100111111"/>
      <node id="14349" label="0010111111"/>
      <node id="14348" label="1010111111"/>
      <node id="14347" label="1110111111"/>
      <node id="14346" label="0110111111"/>
      <node id="14345" label="0001111111"/>
      <node id="14344" label="1001111111"/>
      <node id="14343" label="0101111111"/>
      <node id="14342" label="1101111111"/>
      <node id="14341" label="0011111111"/>
      <node id="14340" label="1011111111"/>
      <node id="14339" label="1111111111"/>
      <node id="14338" label="0111111111"/>
      <edge id="21505" label="0000000000 (1) 0000000001" source="15361" target="15360" cy:directed="1"/>
      <edge id="21504" label="0000000000 (1) 0000000010" source="15361" target="15359" cy:directed="1"/>
      <edge id="21503" label="0000000000 (1) 0001000000" source="15361" target="15358" cy:directed="1"/>
      <edge id="21502" label="0000000000 (1) 1000000000" source="15361" target="15357" cy:directed="1"/>
      <edge id="21501" label="0000000001 (1) 0000000000" source="15360" target="15361" cy:directed="1"/>
      <edge id="21500" label="0000000001 (1) 0000000011" source="15360" target="15017" cy:directed="1"/>
      <edge id="21499" label="0000000001 (1) 0000000101" source="15360" target="15146" cy:directed="1"/>
      <edge id="21498" label="0000000001 (1) 0001000001" source="15360" target="15331" cy:directed="1"/>
      <edge id="21497" label="0000000001 (1) 1000000001" source="15360" target="15356" cy:directed="1"/>
      <edge id="21496" label="0000000010 (1) 0000000011" source="15359" target="15017" cy:directed="1"/>
      <edge id="21495" label="0000000010 (1) 0001000010" source="15359" target="15330" cy:directed="1"/>
      <edge id="21494" label="0000000010 (1) 1000000010" source="15359" target="15355" cy:directed="1"/>
      <edge id="21493" label="0001000000 (1) 0001000001" source="15358" target="15331" cy:directed="1"/>
      <edge id="21492" label="0001000000 (1) 0001000010" source="15358" target="15330" cy:directed="1"/>
      <edge id="21491" label="0001000000 (1) 1001000000" source="15358" target="15354" cy:directed="1"/>
      <edge id="21490" label="1000000000 (1) 1000000001" source="15357" target="15356" cy:directed="1"/>
      <edge id="21489" label="1000000000 (1) 1000000010" source="15357" target="15355" cy:directed="1"/>
      <edge id="21488" label="1000000000 (1) 1001000000" source="15357" target="15354" cy:directed="1"/>
      <edge id="21487" label="1000000000 (1) 1100000000" source="15357" target="15353" cy:directed="1"/>
      <edge id="21486" label="1000000000 (1) 0000000000" source="15357" target="15361" cy:directed="1"/>
      <edge id="21485" label="1000000001 (1) 1000000000" source="15356" target="15357" cy:directed="1"/>
      <edge id="21484" label="1000000001 (1) 1000000011" source="15356" target="15016" cy:directed="1"/>
      <edge id="21483" label="1000000001 (1) 1000000101" source="15356" target="15140" cy:directed="1"/>
      <edge id="21482" label="1000000001 (1) 1001000001" source="15356" target="15333" cy:directed="1"/>
      <edge id="21481" label="1000000001 (1) 1100000001" source="15356" target="15348" cy:directed="1"/>
      <edge id="21480" label="1000000001 (1) 0000000001" source="15356" target="15360" cy:directed="1"/>
      <edge id="21479" label="1000000010 (1) 1000000011" source="15355" target="15016" cy:directed="1"/>
      <edge id="21478" label="1000000010 (1) 1001000010" source="15355" target="15332" cy:directed="1"/>
      <edge id="21477" label="1000000010 (1) 1100000010" source="15355" target="15347" cy:directed="1"/>
      <edge id="21476" label="1000000010 (1) 0000000010" source="15355" target="15359" cy:directed="1"/>
      <edge id="21475" label="1001000000 (1) 1001000001" source="15354" target="15333" cy:directed="1"/>
      <edge id="21474" label="1001000000 (1) 1001000010" source="15354" target="15332" cy:directed="1"/>
      <edge id="21473" label="1001000000 (1) 1101000000" source="15354" target="15346" cy:directed="1"/>
      <edge id="21472" label="1001000000 (1) 0001000000" source="15354" target="15358" cy:directed="1"/>
      <edge id="21471" label="1100000000 (1) 1100000001" source="15353" target="15348" cy:directed="1"/>
      <edge id="21470" label="1100000000 (1) 1100000010" source="15353" target="15347" cy:directed="1"/>
      <edge id="21469" label="1100000000 (1) 1101000000" source="15353" target="15346" cy:directed="1"/>
      <edge id="21468" label="1100000000 (1) 0100000000" source="15353" target="15352" cy:directed="1"/>
      <edge id="21467" label="0100000000 (1) 0100000001" source="15352" target="15351" cy:directed="1"/>
      <edge id="21466" label="0100000000 (1) 0100000010" source="15352" target="15350" cy:directed="1"/>
      <edge id="21465" label="0100000000 (1) 0101000000" source="15352" target="15349" cy:directed="1"/>
      <edge id="21464" label="0100000000 (1) 0000000000" source="15352" target="15361" cy:directed="1"/>
      <edge id="21463" label="0100000000 (1) 1100000000" source="15352" target="15353" cy:directed="1"/>
      <edge id="21462" label="0100000001 (1) 0100000000" source="15351" target="15352" cy:directed="1"/>
      <edge id="21461" label="0100000001 (1) 0100000011" source="15351" target="15012" cy:directed="1"/>
      <edge id="21460" label="0100000001 (1) 0100000101" source="15351" target="15118" cy:directed="1"/>
      <edge id="21459" label="0100000001 (1) 0101000001" source="15351" target="15326" cy:directed="1"/>
      <edge id="21458" label="0100000001 (1) 0000000001" source="15351" target="15360" cy:directed="1"/>
      <edge id="21457" label="0100000001 (1) 1100000001" source="15351" target="15348" cy:directed="1"/>
      <edge id="21456" label="0100000010 (1) 0100000011" source="15350" target="15012" cy:directed="1"/>
      <edge id="21455" label="0100000010 (1) 0101000010" source="15350" target="15325" cy:directed="1"/>
      <edge id="21454" label="0100000010 (1) 0000000010" source="15350" target="15359" cy:directed="1"/>
      <edge id="21453" label="0100000010 (1) 1100000010" source="15350" target="15347" cy:directed="1"/>
      <edge id="21452" label="0101000000 (1) 0101000001" source="15349" target="15326" cy:directed="1"/>
      <edge id="21451" label="0101000000 (1) 0101000010" source="15349" target="15325" cy:directed="1"/>
      <edge id="21450" label="0101000000 (1) 0101100000" source="15349" target="15324" cy:directed="1"/>
      <edge id="21449" label="0101000000 (1) 0001000000" source="15349" target="15358" cy:directed="1"/>
      <edge id="21448" label="0101000000 (1) 1101000000" source="15349" target="15346" cy:directed="1"/>
      <edge id="21447" label="1100000001 (1) 1100000000" source="15348" target="15353" cy:directed="1"/>
      <edge id="21446" label="1100000001 (1) 1100000011" source="15348" target="15013" cy:directed="1"/>
      <edge id="21445" label="1100000001 (1) 1100000101" source="15348" target="15123" cy:directed="1"/>
      <edge id="21444" label="1100000001 (1) 1101000001" source="15348" target="15329" cy:directed="1"/>
      <edge id="21443" label="1100000001 (1) 0100000001" source="15348" target="15351" cy:directed="1"/>
      <edge id="21442" label="1100000010 (1) 1100000011" source="15347" target="15013" cy:directed="1"/>
      <edge id="21441" label="1100000010 (1) 1101000010" source="15347" target="15328" cy:directed="1"/>
      <edge id="21440" label="1100000010 (1) 0100000010" source="15347" target="15350" cy:directed="1"/>
      <edge id="21439" label="1101000000 (1) 1101000001" source="15346" target="15329" cy:directed="1"/>
      <edge id="21438" label="1101000000 (1) 1101000010" source="15346" target="15328" cy:directed="1"/>
      <edge id="21437" label="1101000000 (1) 1101100000" source="15346" target="15327" cy:directed="1"/>
      <edge id="21436" label="1101000000 (1) 0101000000" source="15346" target="15349" cy:directed="1"/>
      <edge id="21435" label="1010000000 (1) 1010000001" source="15345" target="15344" cy:directed="1"/>
      <edge id="21434" label="1010000000 (1) 1010000010" source="15345" target="15343" cy:directed="1"/>
      <edge id="21433" label="1010000000 (1) 1000000000" source="15345" target="15357" cy:directed="1"/>
      <edge id="21432" label="1010000000 (1) 1110000000" source="15345" target="15342" cy:directed="1"/>
      <edge id="21431" label="1010000000 (1) 0010000000" source="15345" target="15341" cy:directed="1"/>
      <edge id="21430" label="1010000001 (1) 1010000000" source="15344" target="15345" cy:directed="1"/>
      <edge id="21429" label="1010000001 (1) 1010000011" source="15344" target="14988" cy:directed="1"/>
      <edge id="21428" label="1010000001 (1) 1010000101" source="15344" target="15094" cy:directed="1"/>
      <edge id="21427" label="1010000001 (1) 1000000001" source="15344" target="15356" cy:directed="1"/>
      <edge id="21426" label="1010000001 (1) 1110000001" source="15344" target="15338" cy:directed="1"/>
      <edge id="21425" label="1010000001 (1) 0010000001" source="15344" target="15340" cy:directed="1"/>
      <edge id="21424" label="1010000010 (1) 1010000011" source="15343" target="14988" cy:directed="1"/>
      <edge id="21423" label="1010000010 (1) 1000000010" source="15343" target="15355" cy:directed="1"/>
      <edge id="21422" label="1010000010 (1) 1110000010" source="15343" target="15337" cy:directed="1"/>
      <edge id="21421" label="1010000010 (1) 0010000010" source="15343" target="15339" cy:directed="1"/>
      <edge id="21420" label="1110000000 (1) 1110000001" source="15342" target="15338" cy:directed="1"/>
      <edge id="21419" label="1110000000 (1) 1110000010" source="15342" target="15337" cy:directed="1"/>
      <edge id="21418" label="1110000000 (1) 1100000000" source="15342" target="15353" cy:directed="1"/>
      <edge id="21417" label="1110000000 (1) 0110000000" source="15342" target="15336" cy:directed="1"/>
      <edge id="21416" label="0010000000 (1) 0010000001" source="15341" target="15340" cy:directed="1"/>
      <edge id="21415" label="0010000000 (1) 0010000010" source="15341" target="15339" cy:directed="1"/>
      <edge id="21414" label="0010000000 (1) 0000000000" source="15341" target="15361" cy:directed="1"/>
      <edge id="21413" label="0010000000 (1) 1010000000" source="15341" target="15345" cy:directed="1"/>
      <edge id="21412" label="0010000001 (1) 0010000000" source="15340" target="15341" cy:directed="1"/>
      <edge id="21411" label="0010000001 (1) 0010000011" source="15340" target="14989" cy:directed="1"/>
      <edge id="21410" label="0010000001 (1) 0010000101" source="15340" target="15090" cy:directed="1"/>
      <edge id="21409" label="0010000001 (1) 0000000001" source="15340" target="15360" cy:directed="1"/>
      <edge id="21408" label="0010000001 (1) 1010000001" source="15340" target="15344" cy:directed="1"/>
      <edge id="21407" label="0010000010 (1) 0010000011" source="15339" target="14989" cy:directed="1"/>
      <edge id="21406" label="0010000010 (1) 0000000010" source="15339" target="15359" cy:directed="1"/>
      <edge id="21405" label="0010000010 (1) 1010000010" source="15339" target="15343" cy:directed="1"/>
      <edge id="21404" label="1110000001 (1) 1110000000" source="15338" target="15342" cy:directed="1"/>
      <edge id="21403" label="1110000001 (1) 1110000011" source="15338" target="14985" cy:directed="1"/>
      <edge id="21402" label="1110000001 (1) 1110000101" source="15338" target="15080" cy:directed="1"/>
      <edge id="21401" label="1110000001 (1) 1100000001" source="15338" target="15348" cy:directed="1"/>
      <edge id="21400" label="1110000001 (1) 0110000001" source="15338" target="15335" cy:directed="1"/>
      <edge id="21399" label="1110000010 (1) 1110000011" source="15337" target="14985" cy:directed="1"/>
      <edge id="21398" label="1110000010 (1) 1100000010" source="15337" target="15347" cy:directed="1"/>
      <edge id="21397" label="1110000010 (1) 0110000010" source="15337" target="15334" cy:directed="1"/>
      <edge id="21396" label="0110000000 (1) 0110000001" source="15336" target="15335" cy:directed="1"/>
      <edge id="21395" label="0110000000 (1) 0110000010" source="15336" target="15334" cy:directed="1"/>
      <edge id="21394" label="0110000000 (1) 0100000000" source="15336" target="15352" cy:directed="1"/>
      <edge id="21393" label="0110000000 (1) 0010000000" source="15336" target="15341" cy:directed="1"/>
      <edge id="21392" label="0110000000 (1) 1110000000" source="15336" target="15342" cy:directed="1"/>
      <edge id="21391" label="0110000001 (1) 0110000000" source="15335" target="15336" cy:directed="1"/>
      <edge id="21390" label="0110000001 (1) 0110000011" source="15335" target="14982" cy:directed="1"/>
      <edge id="21389" label="0110000001 (1) 0110000101" source="15335" target="15076" cy:directed="1"/>
      <edge id="21388" label="0110000001 (1) 0100000001" source="15335" target="15351" cy:directed="1"/>
      <edge id="21387" label="0110000001 (1) 0010000001" source="15335" target="15340" cy:directed="1"/>
      <edge id="21386" label="0110000001 (1) 1110000001" source="15335" target="15338" cy:directed="1"/>
      <edge id="21385" label="0110000010 (1) 0110000011" source="15334" target="14982" cy:directed="1"/>
      <edge id="21384" label="0110000010 (1) 0100000010" source="15334" target="15350" cy:directed="1"/>
      <edge id="21383" label="0110000010 (1) 0010000010" source="15334" target="15339" cy:directed="1"/>
      <edge id="21382" label="0110000010 (1) 1110000010" source="15334" target="15337" cy:directed="1"/>
      <edge id="21381" label="1001000001 (1) 1001000000" source="15333" target="15354" cy:directed="1"/>
      <edge id="21380" label="1001000001 (1) 1001000011" source="15333" target="14964" cy:directed="1"/>
      <edge id="21379" label="1001000001 (1) 1001000101" source="15333" target="15059" cy:directed="1"/>
      <edge id="21378" label="1001000001 (1) 1101000001" source="15333" target="15329" cy:directed="1"/>
      <edge id="21377" label="1001000001 (1) 0001000001" source="15333" target="15331" cy:directed="1"/>
      <edge id="21376" label="1001000010 (1) 1001000011" source="15332" target="14964" cy:directed="1"/>
      <edge id="21375" label="1001000010 (1) 1101000010" source="15332" target="15328" cy:directed="1"/>
      <edge id="21374" label="1001000010 (1) 0001000010" source="15332" target="15330" cy:directed="1"/>
      <edge id="21373" label="0001000001 (1) 0001000000" source="15331" target="15358" cy:directed="1"/>
      <edge id="21372" label="0001000001 (1) 0001000011" source="15331" target="14965" cy:directed="1"/>
      <edge id="21371" label="0001000001 (1) 0001000101" source="15331" target="15063" cy:directed="1"/>
      <edge id="21370" label="0001000001 (1) 1001000001" source="15331" target="15333" cy:directed="1"/>
      <edge id="21369" label="0001000010 (1) 0001000011" source="15330" target="14965" cy:directed="1"/>
      <edge id="21368" label="0001000010 (1) 1001000010" source="15330" target="15332" cy:directed="1"/>
      <edge id="21367" label="1101000001 (1) 1101000000" source="15329" target="15346" cy:directed="1"/>
      <edge id="21366" label="1101000001 (1) 1101000011" source="15329" target="14961" cy:directed="1"/>
      <edge id="21365" label="1101000001 (1) 1101000101" source="15329" target="15055" cy:directed="1"/>
      <edge id="21364" label="1101000001 (1) 1101100001" source="15329" target="15267" cy:directed="1"/>
      <edge id="21363" label="1101000001 (1) 0101000001" source="15329" target="15326" cy:directed="1"/>
      <edge id="21362" label="1101000010 (1) 1101000011" source="15328" target="14961" cy:directed="1"/>
      <edge id="21361" label="1101000010 (1) 1101100010" source="15328" target="14960" cy:directed="1"/>
      <edge id="21360" label="1101000010 (1) 0101000010" source="15328" target="15325" cy:directed="1"/>
      <edge id="21359" label="1101100000 (1) 1101100001" source="15327" target="15267" cy:directed="1"/>
      <edge id="21358" label="1101100000 (1) 1101110000" source="15327" target="15266" cy:directed="1"/>
      <edge id="21357" label="1101100000 (1) 0101100000" source="15327" target="15324" cy:directed="1"/>
      <edge id="21356" label="0101000001 (1) 0101000000" source="15326" target="15349" cy:directed="1"/>
      <edge id="21355" label="0101000001 (1) 0101000011" source="15326" target="14957" cy:directed="1"/>
      <edge id="21354" label="0101000001 (1) 0101000101" source="15326" target="15052" cy:directed="1"/>
      <edge id="21353" label="0101000001 (1) 0101100001" source="15326" target="15265" cy:directed="1"/>
      <edge id="21352" label="0101000001 (1) 0001000001" source="15326" target="15331" cy:directed="1"/>
      <edge id="21351" label="0101000001 (1) 1101000001" source="15326" target="15329" cy:directed="1"/>
      <edge id="21350" label="0101000010 (1) 0101000011" source="15325" target="14957" cy:directed="1"/>
      <edge id="21349" label="0101000010 (1) 0101100010" source="15325" target="14956" cy:directed="1"/>
      <edge id="21348" label="0101000010 (1) 0001000010" source="15325" target="15330" cy:directed="1"/>
      <edge id="21347" label="0101000010 (1) 1101000010" source="15325" target="15328" cy:directed="1"/>
      <edge id="21346" label="0101100000 (1) 0101100001" source="15324" target="15265" cy:directed="1"/>
      <edge id="21345" label="0101100000 (1) 0101110000" source="15324" target="15264" cy:directed="1"/>
      <edge id="21344" label="0101100000 (1) 0001100000" source="15324" target="15300" cy:directed="1"/>
      <edge id="21343" label="0101100000 (1) 1101100000" source="15324" target="15327" cy:directed="1"/>
      <edge id="21342" label="0011000000 (1) 0011000001" source="15323" target="15322" cy:directed="1"/>
      <edge id="21341" label="0011000000 (1) 0011000010" source="15323" target="15321" cy:directed="1"/>
      <edge id="21340" label="0011000000 (1) 0010000000" source="15323" target="15341" cy:directed="1"/>
      <edge id="21339" label="0011000000 (1) 0001000000" source="15323" target="15358" cy:directed="1"/>
      <edge id="21338" label="0011000000 (1) 1011000000" source="15323" target="15320" cy:directed="1"/>
      <edge id="21337" label="0011000001 (1) 0011000000" source="15322" target="15323" cy:directed="1"/>
      <edge id="21336" label="0011000001 (1) 0011000011" source="15322" target="14921" cy:directed="1"/>
      <edge id="21335" label="0011000001 (1) 0011000101" source="15322" target="15039" cy:directed="1"/>
      <edge id="21334" label="0011000001 (1) 0010000001" source="15322" target="15340" cy:directed="1"/>
      <edge id="21333" label="0011000001 (1) 0001000001" source="15322" target="15331" cy:directed="1"/>
      <edge id="21332" label="0011000001 (1) 1011000001" source="15322" target="15319" cy:directed="1"/>
      <edge id="21331" label="0011000010 (1) 0011000011" source="15321" target="14921" cy:directed="1"/>
      <edge id="21330" label="0011000010 (1) 0010000010" source="15321" target="15339" cy:directed="1"/>
      <edge id="21329" label="0011000010 (1) 0001000010" source="15321" target="15330" cy:directed="1"/>
      <edge id="21328" label="0011000010 (1) 1011000010" source="15321" target="15318" cy:directed="1"/>
      <edge id="21327" label="1011000000 (1) 1011000001" source="15320" target="15319" cy:directed="1"/>
      <edge id="21326" label="1011000000 (1) 1011000010" source="15320" target="15318" cy:directed="1"/>
      <edge id="21325" label="1011000000 (1) 1010000000" source="15320" target="15345" cy:directed="1"/>
      <edge id="21324" label="1011000000 (1) 1001000000" source="15320" target="15354" cy:directed="1"/>
      <edge id="21323" label="1011000000 (1) 1111000000" source="15320" target="15317" cy:directed="1"/>
      <edge id="21322" label="1011000000 (1) 0011000000" source="15320" target="15323" cy:directed="1"/>
      <edge id="21321" label="1011000001 (1) 1011000000" source="15319" target="15320" cy:directed="1"/>
      <edge id="21320" label="1011000001 (1) 1011000011" source="15319" target="14918" cy:directed="1"/>
      <edge id="21319" label="1011000001 (1) 1011000101" source="15319" target="15034" cy:directed="1"/>
      <edge id="21318" label="1011000001 (1) 1010000001" source="15319" target="15344" cy:directed="1"/>
      <edge id="21317" label="1011000001 (1) 1001000001" source="15319" target="15333" cy:directed="1"/>
      <edge id="21316" label="1011000001 (1) 1111000001" source="15319" target="15316" cy:directed="1"/>
      <edge id="21315" label="1011000001 (1) 0011000001" source="15319" target="15322" cy:directed="1"/>
      <edge id="21314" label="1011000010 (1) 1011000011" source="15318" target="14918" cy:directed="1"/>
      <edge id="21313" label="1011000010 (1) 1010000010" source="15318" target="15343" cy:directed="1"/>
      <edge id="21312" label="1011000010 (1) 1001000010" source="15318" target="15332" cy:directed="1"/>
      <edge id="21311" label="1011000010 (1) 1111000010" source="15318" target="15315" cy:directed="1"/>
      <edge id="21310" label="1011000010 (1) 0011000010" source="15318" target="15321" cy:directed="1"/>
      <edge id="21309" label="1111000000 (1) 1111000001" source="15317" target="15316" cy:directed="1"/>
      <edge id="21308" label="1111000000 (1) 1111000010" source="15317" target="15315" cy:directed="1"/>
      <edge id="21307" label="1111000000 (1) 1111100000" source="15317" target="15314" cy:directed="1"/>
      <edge id="21306" label="1111000000 (1) 1110000000" source="15317" target="15342" cy:directed="1"/>
      <edge id="21305" label="1111000000 (1) 1101000000" source="15317" target="15346" cy:directed="1"/>
      <edge id="21304" label="1111000000 (1) 0111000000" source="15317" target="15313" cy:directed="1"/>
      <edge id="21303" label="1111000001 (1) 1111000000" source="15316" target="15317" cy:directed="1"/>
      <edge id="21302" label="1111000001 (1) 1111000011" source="15316" target="14915" cy:directed="1"/>
      <edge id="21301" label="1111000001 (1) 1111000101" source="15316" target="15024" cy:directed="1"/>
      <edge id="21300" label="1111000001 (1) 1111100001" source="15316" target="15241" cy:directed="1"/>
      <edge id="21299" label="1111000001 (1) 1110000001" source="15316" target="15338" cy:directed="1"/>
      <edge id="21298" label="1111000001 (1) 1101000001" source="15316" target="15329" cy:directed="1"/>
      <edge id="21297" label="1111000001 (1) 0111000001" source="15316" target="15312" cy:directed="1"/>
      <edge id="21296" label="1111000010 (1) 1111000011" source="15315" target="14915" cy:directed="1"/>
      <edge id="21295" label="1111000010 (1) 1111100010" source="15315" target="14914" cy:directed="1"/>
      <edge id="21294" label="1111000010 (1) 1110000010" source="15315" target="15337" cy:directed="1"/>
      <edge id="21293" label="1111000010 (1) 1101000010" source="15315" target="15328" cy:directed="1"/>
      <edge id="21292" label="1111000010 (1) 0111000010" source="15315" target="15311" cy:directed="1"/>
      <edge id="21291" label="1111100000 (1) 1111100001" source="15314" target="15241" cy:directed="1"/>
      <edge id="21290" label="1111100000 (1) 1111110000" source="15314" target="15240" cy:directed="1"/>
      <edge id="21289" label="1111100000 (1) 1110100000" source="15314" target="15289" cy:directed="1"/>
      <edge id="21288" label="1111100000 (1) 1101100000" source="15314" target="15327" cy:directed="1"/>
      <edge id="21287" label="1111100000 (1) 0111100000" source="15314" target="15310" cy:directed="1"/>
      <edge id="21286" label="0111000000 (1) 0111000001" source="15313" target="15312" cy:directed="1"/>
      <edge id="21285" label="0111000000 (1) 0111000010" source="15313" target="15311" cy:directed="1"/>
      <edge id="21284" label="0111000000 (1) 0111100000" source="15313" target="15310" cy:directed="1"/>
      <edge id="21283" label="0111000000 (1) 0110000000" source="15313" target="15336" cy:directed="1"/>
      <edge id="21282" label="0111000000 (1) 0101000000" source="15313" target="15349" cy:directed="1"/>
      <edge id="21281" label="0111000000 (1) 0011000000" source="15313" target="15323" cy:directed="1"/>
      <edge id="21280" label="0111000000 (1) 1111000000" source="15313" target="15317" cy:directed="1"/>
      <edge id="21279" label="0111000001 (1) 0111000000" source="15312" target="15313" cy:directed="1"/>
      <edge id="21278" label="0111000001 (1) 0111000011" source="15312" target="14905" cy:directed="1"/>
      <edge id="21277" label="0111000001 (1) 0111000101" source="15312" target="15020" cy:directed="1"/>
      <edge id="21276" label="0111000001 (1) 0111100001" source="15312" target="15239" cy:directed="1"/>
      <edge id="21275" label="0111000001 (1) 0110000001" source="15312" target="15335" cy:directed="1"/>
      <edge id="21274" label="0111000001 (1) 0101000001" source="15312" target="15326" cy:directed="1"/>
      <edge id="21273" label="0111000001 (1) 0011000001" source="15312" target="15322" cy:directed="1"/>
      <edge id="21272" label="0111000001 (1) 1111000001" source="15312" target="15316" cy:directed="1"/>
      <edge id="21271" label="0111000010 (1) 0111000011" source="15311" target="14905" cy:directed="1"/>
      <edge id="21270" label="0111000010 (1) 0111100010" source="15311" target="14904" cy:directed="1"/>
      <edge id="21269" label="0111000010 (1) 0110000010" source="15311" target="15334" cy:directed="1"/>
      <edge id="21268" label="0111000010 (1) 0101000010" source="15311" target="15325" cy:directed="1"/>
      <edge id="21267" label="0111000010 (1) 0011000010" source="15311" target="15321" cy:directed="1"/>
      <edge id="21266" label="0111000010 (1) 1111000010" source="15311" target="15315" cy:directed="1"/>
      <edge id="21265" label="0111100000 (1) 0111100001" source="15310" target="15239" cy:directed="1"/>
      <edge id="21264" label="0111100000 (1) 0111110000" source="15310" target="15238" cy:directed="1"/>
      <edge id="21263" label="0111100000 (1) 0110100000" source="15310" target="15286" cy:directed="1"/>
      <edge id="21262" label="0111100000 (1) 0101100000" source="15310" target="15324" cy:directed="1"/>
      <edge id="21261" label="0111100000 (1) 0011100000" source="15310" target="15281" cy:directed="1"/>
      <edge id="21260" label="0111100000 (1) 1111100000" source="15310" target="15314" cy:directed="1"/>
      <edge id="21259" label="1000100000 (1) 1000100001" source="15309" target="15308" cy:directed="1"/>
      <edge id="21258" label="1000100000 (1) 1000110000" source="15309" target="15307" cy:directed="1"/>
      <edge id="21257" label="1000100000 (1) 1000000000" source="15309" target="15357" cy:directed="1"/>
      <edge id="21256" label="1000100000 (1) 1001100000" source="15309" target="15306" cy:directed="1"/>
      <edge id="21255" label="1000100000 (1) 1010100000" source="15309" target="15305" cy:directed="1"/>
      <edge id="21254" label="1000100000 (1) 1100100000" source="15309" target="15304" cy:directed="1"/>
      <edge id="21253" label="1000100000 (1) 0000100000" source="15309" target="15303" cy:directed="1"/>
      <edge id="21252" label="1000100001 (1) 1000100000" source="15308" target="15309" cy:directed="1"/>
      <edge id="21251" label="1000100001 (1) 1000100101" source="15308" target="15015" cy:directed="1"/>
      <edge id="21250" label="1000100001 (1) 1000110001" source="15308" target="15178" cy:directed="1"/>
      <edge id="21249" label="1000100001 (1) 1000000001" source="15308" target="15356" cy:directed="1"/>
      <edge id="21248" label="1000100001 (1) 1001100001" source="15308" target="15280" cy:directed="1"/>
      <edge id="21247" label="1000100001 (1) 1010100001" source="15308" target="15291" cy:directed="1"/>
      <edge id="21246" label="1000100001 (1) 1100100001" source="15308" target="15295" cy:directed="1"/>
      <edge id="21245" label="1000100001 (1) 0000100001" source="15308" target="15302" cy:directed="1"/>
      <edge id="21244" label="1000110000 (1) 1000110001" source="15307" target="15178" cy:directed="1"/>
      <edge id="21243" label="1000110000 (1) 1000111000" source="15307" target="15177" cy:directed="1"/>
      <edge id="21242" label="1000110000 (1) 1000010000" source="15307" target="15277" cy:directed="1"/>
      <edge id="21241" label="1000110000 (1) 1001110000" source="15307" target="15279" cy:directed="1"/>
      <edge id="21240" label="1000110000 (1) 1010110000" source="15307" target="15290" cy:directed="1"/>
      <edge id="21239" label="1000110000 (1) 0000110000" source="15307" target="15301" cy:directed="1"/>
      <edge id="21238" label="1001100000 (1) 1001100001" source="15306" target="15280" cy:directed="1"/>
      <edge id="21237" label="1001100000 (1) 1001110000" source="15306" target="15279" cy:directed="1"/>
      <edge id="21236" label="1001100000 (1) 1001000000" source="15306" target="15354" cy:directed="1"/>
      <edge id="21235" label="1001100000 (1) 1011100000" source="15306" target="15278" cy:directed="1"/>
      <edge id="21234" label="1001100000 (1) 1101100000" source="15306" target="15327" cy:directed="1"/>
      <edge id="21233" label="1001100000 (1) 0001100000" source="15306" target="15300" cy:directed="1"/>
      <edge id="21232" label="1010100000 (1) 1010100001" source="15305" target="15291" cy:directed="1"/>
      <edge id="21231" label="1010100000 (1) 1010110000" source="15305" target="15290" cy:directed="1"/>
      <edge id="21230" label="1010100000 (1) 1010000000" source="15305" target="15345" cy:directed="1"/>
      <edge id="21229" label="1010100000 (1) 1110100000" source="15305" target="15289" cy:directed="1"/>
      <edge id="21228" label="1010100000 (1) 0010100000" source="15305" target="15299" cy:directed="1"/>
      <edge id="21227" label="1100100000 (1) 1100100001" source="15304" target="15295" cy:directed="1"/>
      <edge id="21226" label="1100100000 (1) 1100110000" source="15304" target="15294" cy:directed="1"/>
      <edge id="21225" label="1100100000 (1) 1100000000" source="15304" target="15353" cy:directed="1"/>
      <edge id="21224" label="1100100000 (1) 1101100000" source="15304" target="15327" cy:directed="1"/>
      <edge id="21223" label="1100100000 (1) 0100100000" source="15304" target="15298" cy:directed="1"/>
      <edge id="21222" label="0000100000 (1) 0000100001" source="15303" target="15302" cy:directed="1"/>
      <edge id="21221" label="0000100000 (1) 0000110000" source="15303" target="15301" cy:directed="1"/>
      <edge id="21220" label="0000100000 (1) 0000000000" source="15303" target="15361" cy:directed="1"/>
      <edge id="21219" label="0000100000 (1) 0001100000" source="15303" target="15300" cy:directed="1"/>
      <edge id="21218" label="0000100000 (1) 0010100000" source="15303" target="15299" cy:directed="1"/>
      <edge id="21217" label="0000100000 (1) 1000100000" source="15303" target="15309" cy:directed="1"/>
      <edge id="21216" label="0000100001 (1) 0000100000" source="15302" target="15303" cy:directed="1"/>
      <edge id="21215" label="0000100001 (1) 0000100101" source="15302" target="15011" cy:directed="1"/>
      <edge id="21214" label="0000100001 (1) 0000110001" source="15302" target="15176" cy:directed="1"/>
      <edge id="21213" label="0000100001 (1) 0000000001" source="15302" target="15360" cy:directed="1"/>
      <edge id="21212" label="0000100001 (1) 0001100001" source="15302" target="15283" cy:directed="1"/>
      <edge id="21211" label="0000100001 (1) 0010100001" source="15302" target="15293" cy:directed="1"/>
      <edge id="21210" label="0000100001 (1) 1000100001" source="15302" target="15308" cy:directed="1"/>
      <edge id="21209" label="0000110000 (1) 0000110001" source="15301" target="15176" cy:directed="1"/>
      <edge id="21208" label="0000110000 (1) 0000111000" source="15301" target="15175" cy:directed="1"/>
      <edge id="21207" label="0000110000 (1) 0000010000" source="15301" target="15272" cy:directed="1"/>
      <edge id="21206" label="0000110000 (1) 0001110000" source="15301" target="15282" cy:directed="1"/>
      <edge id="21205" label="0000110000 (1) 0010110000" source="15301" target="15292" cy:directed="1"/>
      <edge id="21204" label="0000110000 (1) 1000110000" source="15301" target="15307" cy:directed="1"/>
      <edge id="21203" label="0001100000 (1) 0001100001" source="15300" target="15283" cy:directed="1"/>
      <edge id="21202" label="0001100000 (1) 0001110000" source="15300" target="15282" cy:directed="1"/>
      <edge id="21201" label="0001100000 (1) 0001000000" source="15300" target="15358" cy:directed="1"/>
      <edge id="21200" label="0001100000 (1) 0011100000" source="15300" target="15281" cy:directed="1"/>
      <edge id="21199" label="0001100000 (1) 1001100000" source="15300" target="15306" cy:directed="1"/>
      <edge id="21198" label="0010100000 (1) 0010100001" source="15299" target="15293" cy:directed="1"/>
      <edge id="21197" label="0010100000 (1) 0010110000" source="15299" target="15292" cy:directed="1"/>
      <edge id="21196" label="0010100000 (1) 0010000000" source="15299" target="15341" cy:directed="1"/>
      <edge id="21195" label="0010100000 (1) 1010100000" source="15299" target="15305" cy:directed="1"/>
      <edge id="21194" label="0100100000 (1) 0100100001" source="15298" target="15297" cy:directed="1"/>
      <edge id="21193" label="0100100000 (1) 0100110000" source="15298" target="15296" cy:directed="1"/>
      <edge id="21192" label="0100100000 (1) 0100000000" source="15298" target="15352" cy:directed="1"/>
      <edge id="21191" label="0100100000 (1) 0101100000" source="15298" target="15324" cy:directed="1"/>
      <edge id="21190" label="0100100000 (1) 0000100000" source="15298" target="15303" cy:directed="1"/>
      <edge id="21189" label="0100100000 (1) 1100100000" source="15298" target="15304" cy:directed="1"/>
      <edge id="21188" label="0100100001 (1) 0100100000" source="15297" target="15298" cy:directed="1"/>
      <edge id="21187" label="0100100001 (1) 0100100101" source="15297" target="15001" cy:directed="1"/>
      <edge id="21186" label="0100100001 (1) 0100110001" source="15297" target="15169" cy:directed="1"/>
      <edge id="21185" label="0100100001 (1) 0100000001" source="15297" target="15351" cy:directed="1"/>
      <edge id="21184" label="0100100001 (1) 0101100001" source="15297" target="15265" cy:directed="1"/>
      <edge id="21183" label="0100100001 (1) 0000100001" source="15297" target="15302" cy:directed="1"/>
      <edge id="21182" label="0100100001 (1) 1100100001" source="15297" target="15295" cy:directed="1"/>
      <edge id="21181" label="0100110000 (1) 0100110001" source="15296" target="15169" cy:directed="1"/>
      <edge id="21180" label="0100110000 (1) 0100111000" source="15296" target="15168" cy:directed="1"/>
      <edge id="21179" label="0100110000 (1) 0100010000" source="15296" target="15258" cy:directed="1"/>
      <edge id="21178" label="0100110000 (1) 0101110000" source="15296" target="15264" cy:directed="1"/>
      <edge id="21177" label="0100110000 (1) 0000110000" source="15296" target="15301" cy:directed="1"/>
      <edge id="21176" label="0100110000 (1) 1100110000" source="15296" target="15294" cy:directed="1"/>
      <edge id="21175" label="1100100001 (1) 1100100000" source="15295" target="15304" cy:directed="1"/>
      <edge id="21174" label="1100100001 (1) 1100100101" source="15295" target="14996" cy:directed="1"/>
      <edge id="21173" label="1100100001 (1) 1100110001" source="15295" target="15167" cy:directed="1"/>
      <edge id="21172" label="1100100001 (1) 1100000001" source="15295" target="15348" cy:directed="1"/>
      <edge id="21171" label="1100100001 (1) 1101100001" source="15295" target="15267" cy:directed="1"/>
      <edge id="21170" label="1100100001 (1) 0100100001" source="15295" target="15297" cy:directed="1"/>
      <edge id="21169" label="1100110000 (1) 1100110001" source="15294" target="15167" cy:directed="1"/>
      <edge id="21168" label="1100110000 (1) 1100111000" source="15294" target="15166" cy:directed="1"/>
      <edge id="21167" label="1100110000 (1) 1100010000" source="15294" target="15263" cy:directed="1"/>
      <edge id="21166" label="1100110000 (1) 1101110000" source="15294" target="15266" cy:directed="1"/>
      <edge id="21165" label="1100110000 (1) 1000110000" source="15294" target="15307" cy:directed="1"/>
      <edge id="21164" label="1100110000 (1) 0100110000" source="15294" target="15296" cy:directed="1"/>
      <edge id="21163" label="0010100001 (1) 0010100000" source="15293" target="15299" cy:directed="1"/>
      <edge id="21162" label="0010100001 (1) 0010100101" source="15293" target="14987" cy:directed="1"/>
      <edge id="21161" label="0010100001 (1) 0010110001" source="15293" target="15165" cy:directed="1"/>
      <edge id="21160" label="0010100001 (1) 0010000001" source="15293" target="15340" cy:directed="1"/>
      <edge id="21159" label="0010100001 (1) 1010100001" source="15293" target="15291" cy:directed="1"/>
      <edge id="21158" label="0010110000 (1) 0010110001" source="15292" target="15165" cy:directed="1"/>
      <edge id="21157" label="0010110000 (1) 0010111000" source="15292" target="15164" cy:directed="1"/>
      <edge id="21156" label="0010110000 (1) 0010010000" source="15292" target="15245" cy:directed="1"/>
      <edge id="21155" label="0010110000 (1) 1010110000" source="15292" target="15290" cy:directed="1"/>
      <edge id="21154" label="1010100001 (1) 1010100000" source="15291" target="15305" cy:directed="1"/>
      <edge id="21153" label="1010100001 (1) 1010100101" source="15291" target="14984" cy:directed="1"/>
      <edge id="21152" label="1010100001 (1) 1010110001" source="15291" target="15163" cy:directed="1"/>
      <edge id="21151" label="1010100001 (1) 1010000001" source="15291" target="15344" cy:directed="1"/>
      <edge id="21150" label="1010100001 (1) 1110100001" source="15291" target="15288" cy:directed="1"/>
      <edge id="21149" label="1010100001 (1) 0010100001" source="15291" target="15293" cy:directed="1"/>
      <edge id="21148" label="1010110000 (1) 1010110001" source="15290" target="15163" cy:directed="1"/>
      <edge id="21147" label="1010110000 (1) 1010111000" source="15290" target="15162" cy:directed="1"/>
      <edge id="21146" label="1010110000 (1) 1010010000" source="15290" target="15249" cy:directed="1"/>
      <edge id="21145" label="1010110000 (1) 0010110000" source="15290" target="15292" cy:directed="1"/>
      <edge id="21144" label="1110100000 (1) 1110100001" source="15289" target="15288" cy:directed="1"/>
      <edge id="21143" label="1110100000 (1) 1110110000" source="15289" target="15287" cy:directed="1"/>
      <edge id="21142" label="1110100000 (1) 1110000000" source="15289" target="15342" cy:directed="1"/>
      <edge id="21141" label="1110100000 (1) 1100100000" source="15289" target="15304" cy:directed="1"/>
      <edge id="21140" label="1110100000 (1) 0110100000" source="15289" target="15286" cy:directed="1"/>
      <edge id="21139" label="1110100001 (1) 1110100000" source="15288" target="15289" cy:directed="1"/>
      <edge id="21138" label="1110100001 (1) 1110100101" source="15288" target="14981" cy:directed="1"/>
      <edge id="21137" label="1110100001 (1) 1110110001" source="15288" target="15157" cy:directed="1"/>
      <edge id="21136" label="1110100001 (1) 1110000001" source="15288" target="15338" cy:directed="1"/>
      <edge id="21135" label="1110100001 (1) 1100100001" source="15288" target="15295" cy:directed="1"/>
      <edge id="21134" label="1110100001 (1) 0110100001" source="15288" target="15285" cy:directed="1"/>
      <edge id="21133" label="1110110000 (1) 1110110001" source="15287" target="15157" cy:directed="1"/>
      <edge id="21132" label="1110110000 (1) 1110111000" source="15287" target="15156" cy:directed="1"/>
      <edge id="21131" label="1110110000 (1) 1110010000" source="15287" target="15233" cy:directed="1"/>
      <edge id="21130" label="1110110000 (1) 1100110000" source="15287" target="15294" cy:directed="1"/>
      <edge id="21129" label="1110110000 (1) 1010110000" source="15287" target="15290" cy:directed="1"/>
      <edge id="21128" label="1110110000 (1) 0110110000" source="15287" target="15284" cy:directed="1"/>
      <edge id="21127" label="0110100000 (1) 0110100001" source="15286" target="15285" cy:directed="1"/>
      <edge id="21126" label="0110100000 (1) 0110110000" source="15286" target="15284" cy:directed="1"/>
      <edge id="21125" label="0110100000 (1) 0110000000" source="15286" target="15336" cy:directed="1"/>
      <edge id="21124" label="0110100000 (1) 0100100000" source="15286" target="15298" cy:directed="1"/>
      <edge id="21123" label="0110100000 (1) 0010100000" source="15286" target="15299" cy:directed="1"/>
      <edge id="21122" label="0110100000 (1) 1110100000" source="15286" target="15289" cy:directed="1"/>
      <edge id="21121" label="0110100001 (1) 0110100000" source="15285" target="15286" cy:directed="1"/>
      <edge id="21120" label="0110100001 (1) 0110100101" source="15285" target="14979" cy:directed="1"/>
      <edge id="21119" label="0110100001 (1) 0110110001" source="15285" target="15155" cy:directed="1"/>
      <edge id="21118" label="0110100001 (1) 0110000001" source="15285" target="15335" cy:directed="1"/>
      <edge id="21117" label="0110100001 (1) 0100100001" source="15285" target="15297" cy:directed="1"/>
      <edge id="21116" label="0110100001 (1) 0010100001" source="15285" target="15293" cy:directed="1"/>
      <edge id="21115" label="0110100001 (1) 1110100001" source="15285" target="15288" cy:directed="1"/>
      <edge id="21114" label="0110110000 (1) 0110110001" source="15284" target="15155" cy:directed="1"/>
      <edge id="21113" label="0110110000 (1) 0110111000" source="15284" target="15154" cy:directed="1"/>
      <edge id="21112" label="0110110000 (1) 0110010000" source="15284" target="15237" cy:directed="1"/>
      <edge id="21111" label="0110110000 (1) 0100110000" source="15284" target="15296" cy:directed="1"/>
      <edge id="21110" label="0110110000 (1) 0010110000" source="15284" target="15292" cy:directed="1"/>
      <edge id="21109" label="0110110000 (1) 1110110000" source="15284" target="15287" cy:directed="1"/>
      <edge id="21108" label="0001100001 (1) 0001100000" source="15283" target="15300" cy:directed="1"/>
      <edge id="21107" label="0001100001 (1) 0001100101" source="15283" target="14963" cy:directed="1"/>
      <edge id="21106" label="0001100001 (1) 0001110001" source="15283" target="15127" cy:directed="1"/>
      <edge id="21105" label="0001100001 (1) 0001000001" source="15283" target="15331" cy:directed="1"/>
      <edge id="21104" label="0001100001 (1) 0011100001" source="15283" target="15253" cy:directed="1"/>
      <edge id="21103" label="0001100001 (1) 1001100001" source="15283" target="15280" cy:directed="1"/>
      <edge id="21102" label="0001110000 (1) 0001110001" source="15282" target="15127" cy:directed="1"/>
      <edge id="21101" label="0001110000 (1) 0001111000" source="15282" target="15126" cy:directed="1"/>
      <edge id="21100" label="0001110000 (1) 0001010000" source="15282" target="15268" cy:directed="1"/>
      <edge id="21099" label="0001110000 (1) 0011110000" source="15282" target="15252" cy:directed="1"/>
      <edge id="21098" label="0001110000 (1) 1001110000" source="15282" target="15279" cy:directed="1"/>
      <edge id="21097" label="0011100000 (1) 0011100001" source="15281" target="15253" cy:directed="1"/>
      <edge id="21096" label="0011100000 (1) 0011110000" source="15281" target="15252" cy:directed="1"/>
      <edge id="21095" label="0011100000 (1) 0011000000" source="15281" target="15323" cy:directed="1"/>
      <edge id="21094" label="0011100000 (1) 0010100000" source="15281" target="15299" cy:directed="1"/>
      <edge id="21093" label="0011100000 (1) 1011100000" source="15281" target="15278" cy:directed="1"/>
      <edge id="21092" label="1001100001 (1) 1001100000" source="15280" target="15306" cy:directed="1"/>
      <edge id="21091" label="1001100001 (1) 1001100101" source="15280" target="14959" cy:directed="1"/>
      <edge id="21090" label="1001100001 (1) 1001110001" source="15280" target="15125" cy:directed="1"/>
      <edge id="21089" label="1001100001 (1) 1001000001" source="15280" target="15333" cy:directed="1"/>
      <edge id="21088" label="1001100001 (1) 1011100001" source="15280" target="15251" cy:directed="1"/>
      <edge id="21087" label="1001100001 (1) 1101100001" source="15280" target="15267" cy:directed="1"/>
      <edge id="21086" label="1001100001 (1) 0001100001" source="15280" target="15283" cy:directed="1"/>
      <edge id="21085" label="1001110000 (1) 1001110001" source="15279" target="15125" cy:directed="1"/>
      <edge id="21084" label="1001110000 (1) 1001111000" source="15279" target="15124" cy:directed="1"/>
      <edge id="21083" label="1001110000 (1) 1001010000" source="15279" target="15273" cy:directed="1"/>
      <edge id="21082" label="1001110000 (1) 1011110000" source="15279" target="15250" cy:directed="1"/>
      <edge id="21081" label="1001110000 (1) 0001110000" source="15279" target="15282" cy:directed="1"/>
      <edge id="21080" label="1011100000 (1) 1011100001" source="15278" target="15251" cy:directed="1"/>
      <edge id="21079" label="1011100000 (1) 1011110000" source="15278" target="15250" cy:directed="1"/>
      <edge id="21078" label="1011100000 (1) 1011000000" source="15278" target="15320" cy:directed="1"/>
      <edge id="21077" label="1011100000 (1) 1010100000" source="15278" target="15305" cy:directed="1"/>
      <edge id="21076" label="1011100000 (1) 1111100000" source="15278" target="15314" cy:directed="1"/>
      <edge id="21075" label="1011100000 (1) 0011100000" source="15278" target="15281" cy:directed="1"/>
      <edge id="21074" label="1000010000 (1) 1000010001" source="15277" target="15276" cy:directed="1"/>
      <edge id="21073" label="1000010000 (1) 1000010010" source="15277" target="15275" cy:directed="1"/>
      <edge id="21072" label="1000010000 (1) 1000011000" source="15277" target="15274" cy:directed="1"/>
      <edge id="21071" label="1000010000 (1) 1000000000" source="15277" target="15357" cy:directed="1"/>
      <edge id="21070" label="1000010000 (1) 1001010000" source="15277" target="15273" cy:directed="1"/>
      <edge id="21069" label="1000010000 (1) 0000010000" source="15277" target="15272" cy:directed="1"/>
      <edge id="21068" label="1000010001 (1) 1000010000" source="15276" target="15277" cy:directed="1"/>
      <edge id="21067" label="1000010001 (1) 1000010011" source="15276" target="14808" cy:directed="1"/>
      <edge id="21066" label="1000010001 (1) 1000010101" source="15276" target="14943" cy:directed="1"/>
      <edge id="21065" label="1000010001 (1) 1000011001" source="15276" target="15042" cy:directed="1"/>
      <edge id="21064" label="1000010001 (1) 1000000001" source="15276" target="15356" cy:directed="1"/>
      <edge id="21063" label="1000010001 (1) 1001010001" source="15276" target="15226" cy:directed="1"/>
      <edge id="21062" label="1000010001 (1) 0000010001" source="15276" target="15271" cy:directed="1"/>
      <edge id="21061" label="1000010010 (1) 1000010011" source="15275" target="14808" cy:directed="1"/>
      <edge id="21060" label="1000010010 (1) 1000000010" source="15275" target="15355" cy:directed="1"/>
      <edge id="21059" label="1000010010 (1) 1001010010" source="15275" target="15225" cy:directed="1"/>
      <edge id="21058" label="1000010010 (1) 0000010010" source="15275" target="15270" cy:directed="1"/>
      <edge id="21057" label="1000011000 (1) 1000011001" source="15274" target="15042" cy:directed="1"/>
      <edge id="21056" label="1000011000 (1) 1000011010" source="15274" target="15041" cy:directed="1"/>
      <edge id="21055" label="1000011000 (1) 1000011100" source="15274" target="15040" cy:directed="1"/>
      <edge id="21054" label="1000011000 (1) 1000001000" source="15274" target="15217" cy:directed="1"/>
      <edge id="21053" label="1000011000 (1) 1001011000" source="15274" target="15224" cy:directed="1"/>
      <edge id="21052" label="1000011000 (1) 0000011000" source="15274" target="15269" cy:directed="1"/>
      <edge id="21051" label="1001010000 (1) 1001010001" source="15273" target="15226" cy:directed="1"/>
      <edge id="21050" label="1001010000 (1) 1001010010" source="15273" target="15225" cy:directed="1"/>
      <edge id="21049" label="1001010000 (1) 1001011000" source="15273" target="15224" cy:directed="1"/>
      <edge id="21048" label="1001010000 (1) 1001000000" source="15273" target="15354" cy:directed="1"/>
      <edge id="21047" label="1001010000 (1) 0001010000" source="15273" target="15268" cy:directed="1"/>
      <edge id="21046" label="0000010000 (1) 0000010001" source="15272" target="15271" cy:directed="1"/>
      <edge id="21045" label="0000010000 (1) 0000010010" source="15272" target="15270" cy:directed="1"/>
      <edge id="21044" label="0000010000 (1) 0000011000" source="15272" target="15269" cy:directed="1"/>
      <edge id="21043" label="0000010000 (1) 0000000000" source="15272" target="15361" cy:directed="1"/>
      <edge id="21042" label="0000010000 (1) 0001010000" source="15272" target="15268" cy:directed="1"/>
      <edge id="21041" label="0000010000 (1) 1000010000" source="15272" target="15277" cy:directed="1"/>
      <edge id="21040" label="0000010001 (1) 0000010000" source="15271" target="15272" cy:directed="1"/>
      <edge id="21039" label="0000010001 (1) 0000010011" source="15271" target="14809" cy:directed="1"/>
      <edge id="21038" label="0000010001 (1) 0000010101" source="15271" target="14954" cy:directed="1"/>
      <edge id="21037" label="0000010001 (1) 0000011001" source="15271" target="15045" cy:directed="1"/>
      <edge id="21036" label="0000010001 (1) 0000000001" source="15271" target="15360" cy:directed="1"/>
      <edge id="21035" label="0000010001 (1) 0001010001" source="15271" target="15229" cy:directed="1"/>
      <edge id="21034" label="0000010001 (1) 1000010001" source="15271" target="15276" cy:directed="1"/>
      <edge id="21033" label="0000010010 (1) 0000010011" source="15270" target="14809" cy:directed="1"/>
      <edge id="21032" label="0000010010 (1) 0000000010" source="15270" target="15359" cy:directed="1"/>
      <edge id="21031" label="0000010010 (1) 0001010010" source="15270" target="15228" cy:directed="1"/>
      <edge id="21030" label="0000010010 (1) 1000010010" source="15270" target="15275" cy:directed="1"/>
      <edge id="21029" label="0000011000 (1) 0000011001" source="15269" target="15045" cy:directed="1"/>
      <edge id="21028" label="0000011000 (1) 0000011010" source="15269" target="15044" cy:directed="1"/>
      <edge id="21027" label="0000011000 (1) 0000011100" source="15269" target="15043" cy:directed="1"/>
      <edge id="21026" label="0000011000 (1) 0000001000" source="15269" target="15212" cy:directed="1"/>
      <edge id="21025" label="0000011000 (1) 0001011000" source="15269" target="15227" cy:directed="1"/>
      <edge id="21024" label="0000011000 (1) 1000011000" source="15269" target="15274" cy:directed="1"/>
      <edge id="21023" label="0001010000 (1) 0001010001" source="15268" target="15229" cy:directed="1"/>
      <edge id="21022" label="0001010000 (1) 0001010010" source="15268" target="15228" cy:directed="1"/>
      <edge id="21021" label="0001010000 (1) 0001011000" source="15268" target="15227" cy:directed="1"/>
      <edge id="21020" label="0001010000 (1) 0001000000" source="15268" target="15358" cy:directed="1"/>
      <edge id="21019" label="0001010000 (1) 1001010000" source="15268" target="15273" cy:directed="1"/>
      <edge id="21018" label="1101100001 (1) 1101100000" source="15267" target="15327" cy:directed="1"/>
      <edge id="21017" label="1101100001 (1) 1101100101" source="15267" target="14939" cy:directed="1"/>
      <edge id="21016" label="1101100001 (1) 1101110001" source="15267" target="15107" cy:directed="1"/>
      <edge id="21015" label="1101100001 (1) 0101100001" source="15267" target="15265" cy:directed="1"/>
      <edge id="21014" label="1101110000 (1) 1101110001" source="15266" target="15107" cy:directed="1"/>
      <edge id="21013" label="1101110000 (1) 1101111000" source="15266" target="15106" cy:directed="1"/>
      <edge id="21012" label="1101110000 (1) 1001110000" source="15266" target="15279" cy:directed="1"/>
      <edge id="21011" label="1101110000 (1) 0101110000" source="15266" target="15264" cy:directed="1"/>
      <edge id="21010" label="0101100001 (1) 0101100000" source="15265" target="15324" cy:directed="1"/>
      <edge id="21009" label="0101100001 (1) 0101100101" source="15265" target="14937" cy:directed="1"/>
      <edge id="21008" label="0101100001 (1) 0101110001" source="15265" target="15105" cy:directed="1"/>
      <edge id="21007" label="0101100001 (1) 0001100001" source="15265" target="15283" cy:directed="1"/>
      <edge id="21006" label="0101100001 (1) 1101100001" source="15265" target="15267" cy:directed="1"/>
      <edge id="21005" label="0101110000 (1) 0101110001" source="15264" target="15105" cy:directed="1"/>
      <edge id="21004" label="0101110000 (1) 0101111000" source="15264" target="15104" cy:directed="1"/>
      <edge id="21003" label="0101110000 (1) 0001110000" source="15264" target="15282" cy:directed="1"/>
      <edge id="21002" label="0101110000 (1) 1101110000" source="15264" target="15266" cy:directed="1"/>
      <edge id="21001" label="1100010000 (1) 1100010001" source="15263" target="15262" cy:directed="1"/>
      <edge id="21000" label="1100010000 (1) 1100010010" source="15263" target="15261" cy:directed="1"/>
      <edge id="20999" label="1100010000 (1) 1100011000" source="15263" target="15260" cy:directed="1"/>
      <edge id="20998" label="1100010000 (1) 1100000000" source="15263" target="15353" cy:directed="1"/>
      <edge id="20997" label="1100010000 (1) 1101010000" source="15263" target="15259" cy:directed="1"/>
      <edge id="20996" label="1100010000 (1) 1000010000" source="15263" target="15277" cy:directed="1"/>
      <edge id="20995" label="1100010000 (1) 0100010000" source="15263" target="15258" cy:directed="1"/>
      <edge id="20994" label="1100010001 (1) 1100010000" source="15262" target="15263" cy:directed="1"/>
      <edge id="20993" label="1100010001 (1) 1100010011" source="15262" target="14789" cy:directed="1"/>
      <edge id="20992" label="1100010001 (1) 1100010101" source="15262" target="14930" cy:directed="1"/>
      <edge id="20991" label="1100010001 (1) 1100011001" source="15262" target="15027" cy:directed="1"/>
      <edge id="20990" label="1100010001 (1) 1100000001" source="15262" target="15348" cy:directed="1"/>
      <edge id="20989" label="1100010001 (1) 1101010001" source="15262" target="15220" cy:directed="1"/>
      <edge id="20988" label="1100010001 (1) 1000010001" source="15262" target="15276" cy:directed="1"/>
      <edge id="20987" label="1100010001 (1) 0100010001" source="15262" target="15257" cy:directed="1"/>
      <edge id="20986" label="1100010010 (1) 1100010011" source="15261" target="14789" cy:directed="1"/>
      <edge id="20985" label="1100010010 (1) 1100000010" source="15261" target="15347" cy:directed="1"/>
      <edge id="20984" label="1100010010 (1) 1101010010" source="15261" target="15219" cy:directed="1"/>
      <edge id="20983" label="1100010010 (1) 1000010010" source="15261" target="15275" cy:directed="1"/>
      <edge id="20982" label="1100010010 (1) 0100010010" source="15261" target="15256" cy:directed="1"/>
      <edge id="20981" label="1100011000 (1) 1100011001" source="15260" target="15027" cy:directed="1"/>
      <edge id="20980" label="1100011000 (1) 1100011010" source="15260" target="15026" cy:directed="1"/>
      <edge id="20979" label="1100011000 (1) 1100011100" source="15260" target="15025" cy:directed="1"/>
      <edge id="20978" label="1100011000 (1) 1100001000" source="15260" target="15213" cy:directed="1"/>
      <edge id="20977" label="1100011000 (1) 1101011000" source="15260" target="15218" cy:directed="1"/>
      <edge id="20976" label="1100011000 (1) 1000011000" source="15260" target="15274" cy:directed="1"/>
      <edge id="20975" label="1100011000 (1) 0100011000" source="15260" target="15255" cy:directed="1"/>
      <edge id="20974" label="1101010000 (1) 1101010001" source="15259" target="15220" cy:directed="1"/>
      <edge id="20973" label="1101010000 (1) 1101010010" source="15259" target="15219" cy:directed="1"/>
      <edge id="20972" label="1101010000 (1) 1101011000" source="15259" target="15218" cy:directed="1"/>
      <edge id="20971" label="1101010000 (1) 1101000000" source="15259" target="15346" cy:directed="1"/>
      <edge id="20970" label="1101010000 (1) 1101110000" source="15259" target="15266" cy:directed="1"/>
      <edge id="20969" label="1101010000 (1) 1001010000" source="15259" target="15273" cy:directed="1"/>
      <edge id="20968" label="1101010000 (1) 0101010000" source="15259" target="15254" cy:directed="1"/>
      <edge id="20967" label="0100010000 (1) 0100010001" source="15258" target="15257" cy:directed="1"/>
      <edge id="20966" label="0100010000 (1) 0100010010" source="15258" target="15256" cy:directed="1"/>
      <edge id="20965" label="0100010000 (1) 0100011000" source="15258" target="15255" cy:directed="1"/>
      <edge id="20964" label="0100010000 (1) 0100000000" source="15258" target="15352" cy:directed="1"/>
      <edge id="20963" label="0100010000 (1) 0101010000" source="15258" target="15254" cy:directed="1"/>
      <edge id="20962" label="0100010000 (1) 0000010000" source="15258" target="15272" cy:directed="1"/>
      <edge id="20961" label="0100010000 (1) 1100010000" source="15258" target="15263" cy:directed="1"/>
      <edge id="20960" label="0100010001 (1) 0100010000" source="15257" target="15258" cy:directed="1"/>
      <edge id="20959" label="0100010001 (1) 0100010011" source="15257" target="14791" cy:directed="1"/>
      <edge id="20958" label="0100010001 (1) 0100010101" source="15257" target="14934" cy:directed="1"/>
      <edge id="20957" label="0100010001 (1) 0100011001" source="15257" target="15030" cy:directed="1"/>
      <edge id="20956" label="0100010001 (1) 0100000001" source="15257" target="15351" cy:directed="1"/>
      <edge id="20955" label="0100010001 (1) 0101010001" source="15257" target="15223" cy:directed="1"/>
      <edge id="20954" label="0100010001 (1) 0000010001" source="15257" target="15271" cy:directed="1"/>
      <edge id="20953" label="0100010001 (1) 1100010001" source="15257" target="15262" cy:directed="1"/>
      <edge id="20952" label="0100010010 (1) 0100010011" source="15256" target="14791" cy:directed="1"/>
      <edge id="20951" label="0100010010 (1) 0100000010" source="15256" target="15350" cy:directed="1"/>
      <edge id="20950" label="0100010010 (1) 0101010010" source="15256" target="15222" cy:directed="1"/>
      <edge id="20949" label="0100010010 (1) 0000010010" source="15256" target="15270" cy:directed="1"/>
      <edge id="20948" label="0100010010 (1) 1100010010" source="15256" target="15261" cy:directed="1"/>
      <edge id="20947" label="0100011000 (1) 0100011001" source="15255" target="15030" cy:directed="1"/>
      <edge id="20946" label="0100011000 (1) 0100011010" source="15255" target="15029" cy:directed="1"/>
      <edge id="20945" label="0100011000 (1) 0100011100" source="15255" target="15028" cy:directed="1"/>
      <edge id="20944" label="0100011000 (1) 0100001000" source="15255" target="15205" cy:directed="1"/>
      <edge id="20943" label="0100011000 (1) 0101011000" source="15255" target="15221" cy:directed="1"/>
      <edge id="20942" label="0100011000 (1) 0000011000" source="15255" target="15269" cy:directed="1"/>
      <edge id="20941" label="0100011000 (1) 1100011000" source="15255" target="15260" cy:directed="1"/>
      <edge id="20940" label="0101010000 (1) 0101010001" source="15254" target="15223" cy:directed="1"/>
      <edge id="20939" label="0101010000 (1) 0101010010" source="15254" target="15222" cy:directed="1"/>
      <edge id="20938" label="0101010000 (1) 0101011000" source="15254" target="15221" cy:directed="1"/>
      <edge id="20937" label="0101010000 (1) 0101000000" source="15254" target="15349" cy:directed="1"/>
      <edge id="20936" label="0101010000 (1) 0101110000" source="15254" target="15264" cy:directed="1"/>
      <edge id="20935" label="0101010000 (1) 0001010000" source="15254" target="15268" cy:directed="1"/>
      <edge id="20934" label="0101010000 (1) 1101010000" source="15254" target="15259" cy:directed="1"/>
      <edge id="20933" label="0011100001 (1) 0011100000" source="15253" target="15281" cy:directed="1"/>
      <edge id="20932" label="0011100001 (1) 0011100101" source="15253" target="14911" cy:directed="1"/>
      <edge id="20931" label="0011100001 (1) 0011110001" source="15253" target="15084" cy:directed="1"/>
      <edge id="20930" label="0011100001 (1) 0011000001" source="15253" target="15322" cy:directed="1"/>
      <edge id="20929" label="0011100001 (1) 0010100001" source="15253" target="15293" cy:directed="1"/>
      <edge id="20928" label="0011100001 (1) 1011100001" source="15253" target="15251" cy:directed="1"/>
      <edge id="20927" label="0011110000 (1) 0011110001" source="15252" target="15084" cy:directed="1"/>
      <edge id="20926" label="0011110000 (1) 0011111000" source="15252" target="15083" cy:directed="1"/>
      <edge id="20925" label="0011110000 (1) 0011010000" source="15252" target="15201" cy:directed="1"/>
      <edge id="20924" label="0011110000 (1) 0010110000" source="15252" target="15292" cy:directed="1"/>
      <edge id="20923" label="0011110000 (1) 1011110000" source="15252" target="15250" cy:directed="1"/>
      <edge id="20922" label="1011100001 (1) 1011100000" source="15251" target="15278" cy:directed="1"/>
      <edge id="20921" label="1011100001 (1) 1011100101" source="15251" target="14909" cy:directed="1"/>
      <edge id="20920" label="1011100001 (1) 1011110001" source="15251" target="15082" cy:directed="1"/>
      <edge id="20919" label="1011100001 (1) 1011000001" source="15251" target="15319" cy:directed="1"/>
      <edge id="20918" label="1011100001 (1) 1010100001" source="15251" target="15291" cy:directed="1"/>
      <edge id="20917" label="1011100001 (1) 1111100001" source="15251" target="15241" cy:directed="1"/>
      <edge id="20916" label="1011100001 (1) 0011100001" source="15251" target="15253" cy:directed="1"/>
      <edge id="20915" label="1011110000 (1) 1011110001" source="15250" target="15082" cy:directed="1"/>
      <edge id="20914" label="1011110000 (1) 1011111000" source="15250" target="15081" cy:directed="1"/>
      <edge id="20913" label="1011110000 (1) 1011010000" source="15250" target="15197" cy:directed="1"/>
      <edge id="20912" label="1011110000 (1) 1010110000" source="15250" target="15290" cy:directed="1"/>
      <edge id="20911" label="1011110000 (1) 0011110000" source="15250" target="15252" cy:directed="1"/>
      <edge id="20910" label="1010010000 (1) 1010010001" source="15249" target="15248" cy:directed="1"/>
      <edge id="20909" label="1010010000 (1) 1010010010" source="15249" target="15247" cy:directed="1"/>
      <edge id="20908" label="1010010000 (1) 1010011000" source="15249" target="15246" cy:directed="1"/>
      <edge id="20907" label="1010010000 (1) 1010000000" source="15249" target="15345" cy:directed="1"/>
      <edge id="20906" label="1010010000 (1) 1000010000" source="15249" target="15277" cy:directed="1"/>
      <edge id="20905" label="1010010000 (1) 0010010000" source="15249" target="15245" cy:directed="1"/>
      <edge id="20904" label="1010010001 (1) 1010010000" source="15248" target="15249" cy:directed="1"/>
      <edge id="20903" label="1010010001 (1) 1010010011" source="15248" target="14773" cy:directed="1"/>
      <edge id="20902" label="1010010001 (1) 1010010101" source="15248" target="14903" cy:directed="1"/>
      <edge id="20901" label="1010010001 (1) 1010011001" source="15248" target="15004" cy:directed="1"/>
      <edge id="20900" label="1010010001 (1) 1010000001" source="15248" target="15344" cy:directed="1"/>
      <edge id="20899" label="1010010001 (1) 1000010001" source="15248" target="15276" cy:directed="1"/>
      <edge id="20898" label="1010010001 (1) 0010010001" source="15248" target="15244" cy:directed="1"/>
      <edge id="20897" label="1010010010 (1) 1010010011" source="15247" target="14773" cy:directed="1"/>
      <edge id="20896" label="1010010010 (1) 1010000010" source="15247" target="15343" cy:directed="1"/>
      <edge id="20895" label="1010010010 (1) 1000010010" source="15247" target="15275" cy:directed="1"/>
      <edge id="20894" label="1010010010 (1) 0010010010" source="15247" target="15243" cy:directed="1"/>
      <edge id="20893" label="1010011000 (1) 1010011001" source="15246" target="15004" cy:directed="1"/>
      <edge id="20892" label="1010011000 (1) 1010011010" source="15246" target="15003" cy:directed="1"/>
      <edge id="20891" label="1010011000 (1) 1010011100" source="15246" target="15002" cy:directed="1"/>
      <edge id="20890" label="1010011000 (1) 1010001000" source="15246" target="15185" cy:directed="1"/>
      <edge id="20889" label="1010011000 (1) 1000011000" source="15246" target="15274" cy:directed="1"/>
      <edge id="20888" label="1010011000 (1) 0010011000" source="15246" target="15242" cy:directed="1"/>
      <edge id="20887" label="0010010000 (1) 0010010001" source="15245" target="15244" cy:directed="1"/>
      <edge id="20886" label="0010010000 (1) 0010010010" source="15245" target="15243" cy:directed="1"/>
      <edge id="20885" label="0010010000 (1) 0010011000" source="15245" target="15242" cy:directed="1"/>
      <edge id="20884" label="0010010000 (1) 0010000000" source="15245" target="15341" cy:directed="1"/>
      <edge id="20883" label="0010010000 (1) 0000010000" source="15245" target="15272" cy:directed="1"/>
      <edge id="20882" label="0010010000 (1) 1010010000" source="15245" target="15249" cy:directed="1"/>
      <edge id="20881" label="0010010001 (1) 0010010000" source="15244" target="15245" cy:directed="1"/>
      <edge id="20880" label="0010010001 (1) 0010010011" source="15244" target="14772" cy:directed="1"/>
      <edge id="20879" label="0010010001 (1) 0010010101" source="15244" target="14901" cy:directed="1"/>
      <edge id="20878" label="0010010001 (1) 0010011001" source="15244" target="15007" cy:directed="1"/>
      <edge id="20877" label="0010010001 (1) 0010000001" source="15244" target="15340" cy:directed="1"/>
      <edge id="20876" label="0010010001 (1) 0000010001" source="15244" target="15271" cy:directed="1"/>
      <edge id="20875" label="0010010001 (1) 1010010001" source="15244" target="15248" cy:directed="1"/>
      <edge id="20874" label="0010010010 (1) 0010010011" source="15243" target="14772" cy:directed="1"/>
      <edge id="20873" label="0010010010 (1) 0010000010" source="15243" target="15339" cy:directed="1"/>
      <edge id="20872" label="0010010010 (1) 0000010010" source="15243" target="15270" cy:directed="1"/>
      <edge id="20871" label="0010010010 (1) 1010010010" source="15243" target="15247" cy:directed="1"/>
      <edge id="20870" label="0010011000 (1) 0010011001" source="15242" target="15007" cy:directed="1"/>
      <edge id="20869" label="0010011000 (1) 0010011010" source="15242" target="15006" cy:directed="1"/>
      <edge id="20868" label="0010011000 (1) 0010011100" source="15242" target="15005" cy:directed="1"/>
      <edge id="20867" label="0010011000 (1) 0010001000" source="15242" target="15181" cy:directed="1"/>
      <edge id="20866" label="0010011000 (1) 0000011000" source="15242" target="15269" cy:directed="1"/>
      <edge id="20865" label="0010011000 (1) 1010011000" source="15242" target="15246" cy:directed="1"/>
      <edge id="20864" label="1111100001 (1) 1111100000" source="15241" target="15314" cy:directed="1"/>
      <edge id="20863" label="1111100001 (1) 1111100101" source="15241" target="14899" cy:directed="1"/>
      <edge id="20862" label="1111100001 (1) 1111110001" source="15241" target="15073" cy:directed="1"/>
      <edge id="20861" label="1111100001 (1) 1110100001" source="15241" target="15288" cy:directed="1"/>
      <edge id="20860" label="1111100001 (1) 1101100001" source="15241" target="15267" cy:directed="1"/>
      <edge id="20859" label="1111100001 (1) 0111100001" source="15241" target="15239" cy:directed="1"/>
      <edge id="20858" label="1111110000 (1) 1111110001" source="15240" target="15073" cy:directed="1"/>
      <edge id="20857" label="1111110000 (1) 1111111000" source="15240" target="15072" cy:directed="1"/>
      <edge id="20856" label="1111110000 (1) 1110110000" source="15240" target="15287" cy:directed="1"/>
      <edge id="20855" label="1111110000 (1) 1101110000" source="15240" target="15266" cy:directed="1"/>
      <edge id="20854" label="1111110000 (1) 1011110000" source="15240" target="15250" cy:directed="1"/>
      <edge id="20853" label="1111110000 (1) 0111110000" source="15240" target="15238" cy:directed="1"/>
      <edge id="20852" label="0111100001 (1) 0111100000" source="15239" target="15310" cy:directed="1"/>
      <edge id="20851" label="0111100001 (1) 0111100101" source="15239" target="14897" cy:directed="1"/>
      <edge id="20850" label="0111100001 (1) 0111110001" source="15239" target="15071" cy:directed="1"/>
      <edge id="20849" label="0111100001 (1) 0110100001" source="15239" target="15285" cy:directed="1"/>
      <edge id="20848" label="0111100001 (1) 0101100001" source="15239" target="15265" cy:directed="1"/>
      <edge id="20847" label="0111100001 (1) 0011100001" source="15239" target="15253" cy:directed="1"/>
      <edge id="20846" label="0111100001 (1) 1111100001" source="15239" target="15241" cy:directed="1"/>
      <edge id="20845" label="0111110000 (1) 0111110001" source="15238" target="15071" cy:directed="1"/>
      <edge id="20844" label="0111110000 (1) 0111111000" source="15238" target="15070" cy:directed="1"/>
      <edge id="20843" label="0111110000 (1) 0110110000" source="15238" target="15284" cy:directed="1"/>
      <edge id="20842" label="0111110000 (1) 0101110000" source="15238" target="15264" cy:directed="1"/>
      <edge id="20841" label="0111110000 (1) 0011110000" source="15238" target="15252" cy:directed="1"/>
      <edge id="20840" label="0111110000 (1) 1111110000" source="15238" target="15240" cy:directed="1"/>
      <edge id="20839" label="0110010000 (1) 0110010001" source="15237" target="15236" cy:directed="1"/>
      <edge id="20838" label="0110010000 (1) 0110010010" source="15237" target="15235" cy:directed="1"/>
      <edge id="20837" label="0110010000 (1) 0110011000" source="15237" target="15234" cy:directed="1"/>
      <edge id="20836" label="0110010000 (1) 0110000000" source="15237" target="15336" cy:directed="1"/>
      <edge id="20835" label="0110010000 (1) 0100010000" source="15237" target="15258" cy:directed="1"/>
      <edge id="20834" label="0110010000 (1) 0010010000" source="15237" target="15245" cy:directed="1"/>
      <edge id="20833" label="0110010000 (1) 1110010000" source="15237" target="15233" cy:directed="1"/>
      <edge id="20832" label="0110010001 (1) 0110010000" source="15236" target="15237" cy:directed="1"/>
      <edge id="20831" label="0110010001 (1) 0110010011" source="15236" target="14759" cy:directed="1"/>
      <edge id="20830" label="0110010001 (1) 0110010101" source="15236" target="14894" cy:directed="1"/>
      <edge id="20829" label="0110010001 (1) 0110011001" source="15236" target="14994" cy:directed="1"/>
      <edge id="20828" label="0110010001 (1) 0110000001" source="15236" target="15335" cy:directed="1"/>
      <edge id="20827" label="0110010001 (1) 0100010001" source="15236" target="15257" cy:directed="1"/>
      <edge id="20826" label="0110010001 (1) 0010010001" source="15236" target="15244" cy:directed="1"/>
      <edge id="20825" label="0110010001 (1) 1110010001" source="15236" target="15232" cy:directed="1"/>
      <edge id="20824" label="0110010010 (1) 0110010011" source="15235" target="14759" cy:directed="1"/>
      <edge id="20823" label="0110010010 (1) 0110000010" source="15235" target="15334" cy:directed="1"/>
      <edge id="20822" label="0110010010 (1) 0100010010" source="15235" target="15256" cy:directed="1"/>
      <edge id="20821" label="0110010010 (1) 0010010010" source="15235" target="15243" cy:directed="1"/>
      <edge id="20820" label="0110010010 (1) 1110010010" source="15235" target="15231" cy:directed="1"/>
      <edge id="20819" label="0110011000 (1) 0110011001" source="15234" target="14994" cy:directed="1"/>
      <edge id="20818" label="0110011000 (1) 0110011010" source="15234" target="14993" cy:directed="1"/>
      <edge id="20817" label="0110011000 (1) 0110011100" source="15234" target="14992" cy:directed="1"/>
      <edge id="20816" label="0110011000 (1) 0110001000" source="15234" target="15172" cy:directed="1"/>
      <edge id="20815" label="0110011000 (1) 0100011000" source="15234" target="15255" cy:directed="1"/>
      <edge id="20814" label="0110011000 (1) 0010011000" source="15234" target="15242" cy:directed="1"/>
      <edge id="20813" label="0110011000 (1) 1110011000" source="15234" target="15230" cy:directed="1"/>
      <edge id="20812" label="1110010000 (1) 1110010001" source="15233" target="15232" cy:directed="1"/>
      <edge id="20811" label="1110010000 (1) 1110010010" source="15233" target="15231" cy:directed="1"/>
      <edge id="20810" label="1110010000 (1) 1110011000" source="15233" target="15230" cy:directed="1"/>
      <edge id="20809" label="1110010000 (1) 1110000000" source="15233" target="15342" cy:directed="1"/>
      <edge id="20808" label="1110010000 (1) 1100010000" source="15233" target="15263" cy:directed="1"/>
      <edge id="20807" label="1110010000 (1) 1010010000" source="15233" target="15249" cy:directed="1"/>
      <edge id="20806" label="1110010000 (1) 0110010000" source="15233" target="15237" cy:directed="1"/>
      <edge id="20805" label="1110010001 (1) 1110010000" source="15232" target="15233" cy:directed="1"/>
      <edge id="20804" label="1110010001 (1) 1110010011" source="15232" target="14763" cy:directed="1"/>
      <edge id="20803" label="1110010001 (1) 1110010101" source="15232" target="14891" cy:directed="1"/>
      <edge id="20802" label="1110010001 (1) 1110011001" source="15232" target="14999" cy:directed="1"/>
      <edge id="20801" label="1110010001 (1) 1110000001" source="15232" target="15338" cy:directed="1"/>
      <edge id="20800" label="1110010001 (1) 1100010001" source="15232" target="15262" cy:directed="1"/>
      <edge id="20799" label="1110010001 (1) 1010010001" source="15232" target="15248" cy:directed="1"/>
      <edge id="20798" label="1110010001 (1) 0110010001" source="15232" target="15236" cy:directed="1"/>
      <edge id="20797" label="1110010010 (1) 1110010011" source="15231" target="14763" cy:directed="1"/>
      <edge id="20796" label="1110010010 (1) 1110000010" source="15231" target="15337" cy:directed="1"/>
      <edge id="20795" label="1110010010 (1) 1100010010" source="15231" target="15261" cy:directed="1"/>
      <edge id="20794" label="1110010010 (1) 1010010010" source="15231" target="15247" cy:directed="1"/>
      <edge id="20793" label="1110010010 (1) 0110010010" source="15231" target="15235" cy:directed="1"/>
      <edge id="20792" label="1110011000 (1) 1110011001" source="15230" target="14999" cy:directed="1"/>
      <edge id="20791" label="1110011000 (1) 1110011010" source="15230" target="14998" cy:directed="1"/>
      <edge id="20790" label="1110011000 (1) 1110011100" source="15230" target="14997" cy:directed="1"/>
      <edge id="20789" label="1110011000 (1) 1110001000" source="15230" target="15182" cy:directed="1"/>
      <edge id="20788" label="1110011000 (1) 1100011000" source="15230" target="15260" cy:directed="1"/>
      <edge id="20787" label="1110011000 (1) 1010011000" source="15230" target="15246" cy:directed="1"/>
      <edge id="20786" label="1110011000 (1) 0110011000" source="15230" target="15234" cy:directed="1"/>
      <edge id="20785" label="0001010001 (1) 0001010000" source="15229" target="15268" cy:directed="1"/>
      <edge id="20784" label="0001010001 (1) 0001010011" source="15229" target="14744" cy:directed="1"/>
      <edge id="20783" label="0001010001 (1) 0001010101" source="15229" target="14862" cy:directed="1"/>
      <edge id="20782" label="0001010001 (1) 0001011001" source="15229" target="14977" cy:directed="1"/>
      <edge id="20781" label="0001010001 (1) 0001000001" source="15229" target="15331" cy:directed="1"/>
      <edge id="20780" label="0001010001 (1) 1001010001" source="15229" target="15226" cy:directed="1"/>
      <edge id="20779" label="0001010010 (1) 0001010011" source="15228" target="14744" cy:directed="1"/>
      <edge id="20778" label="0001010010 (1) 0001000010" source="15228" target="15330" cy:directed="1"/>
      <edge id="20777" label="0001010010 (1) 1001010010" source="15228" target="15225" cy:directed="1"/>
      <edge id="20776" label="0001011000 (1) 0001011001" source="15227" target="14977" cy:directed="1"/>
      <edge id="20775" label="0001011000 (1) 0001011010" source="15227" target="14976" cy:directed="1"/>
      <edge id="20774" label="0001011000 (1) 0001011100" source="15227" target="14975" cy:directed="1"/>
      <edge id="20773" label="0001011000 (1) 0001001000" source="15227" target="15209" cy:directed="1"/>
      <edge id="20772" label="0001011000 (1) 1001011000" source="15227" target="15224" cy:directed="1"/>
      <edge id="20771" label="1001010001 (1) 1001010000" source="15226" target="15273" cy:directed="1"/>
      <edge id="20770" label="1001010001 (1) 1001010011" source="15226" target="14745" cy:directed="1"/>
      <edge id="20769" label="1001010001 (1) 1001010101" source="15226" target="14865" cy:directed="1"/>
      <edge id="20768" label="1001010001 (1) 1001011001" source="15226" target="14974" cy:directed="1"/>
      <edge id="20767" label="1001010001 (1) 1001000001" source="15226" target="15333" cy:directed="1"/>
      <edge id="20766" label="1001010001 (1) 0001010001" source="15226" target="15229" cy:directed="1"/>
      <edge id="20765" label="1001010010 (1) 1001010011" source="15225" target="14745" cy:directed="1"/>
      <edge id="20764" label="1001010010 (1) 1001000010" source="15225" target="15332" cy:directed="1"/>
      <edge id="20763" label="1001010010 (1) 0001010010" source="15225" target="15228" cy:directed="1"/>
      <edge id="20762" label="1001011000 (1) 1001011001" source="15224" target="14974" cy:directed="1"/>
      <edge id="20761" label="1001011000 (1) 1001011010" source="15224" target="14973" cy:directed="1"/>
      <edge id="20760" label="1001011000 (1) 1001011100" source="15224" target="14972" cy:directed="1"/>
      <edge id="20759" label="1001011000 (1) 1001001000" source="15224" target="15214" cy:directed="1"/>
      <edge id="20758" label="1001011000 (1) 0001011000" source="15224" target="15227" cy:directed="1"/>
      <edge id="20757" label="0101010001 (1) 0101010000" source="15223" target="15254" cy:directed="1"/>
      <edge id="20756" label="0101010001 (1) 0101010011" source="15223" target="14736" cy:directed="1"/>
      <edge id="20755" label="0101010001 (1) 0101010101" source="15223" target="14854" cy:directed="1"/>
      <edge id="20754" label="0101010001 (1) 0101011001" source="15223" target="14971" cy:directed="1"/>
      <edge id="20753" label="0101010001 (1) 0101000001" source="15223" target="15326" cy:directed="1"/>
      <edge id="20752" label="0101010001 (1) 0101110001" source="15223" target="15105" cy:directed="1"/>
      <edge id="20751" label="0101010001 (1) 0001010001" source="15223" target="15229" cy:directed="1"/>
      <edge id="20750" label="0101010001 (1) 1101010001" source="15223" target="15220" cy:directed="1"/>
      <edge id="20749" label="0101010010 (1) 0101010011" source="15222" target="14736" cy:directed="1"/>
      <edge id="20748" label="0101010010 (1) 0101000010" source="15222" target="15325" cy:directed="1"/>
      <edge id="20747" label="0101010010 (1) 0101110010" source="15222" target="14787" cy:directed="1"/>
      <edge id="20746" label="0101010010 (1) 0001010010" source="15222" target="15228" cy:directed="1"/>
      <edge id="20745" label="0101010010 (1) 1101010010" source="15222" target="15219" cy:directed="1"/>
      <edge id="20744" label="0101011000 (1) 0101011001" source="15221" target="14971" cy:directed="1"/>
      <edge id="20743" label="0101011000 (1) 0101011010" source="15221" target="14970" cy:directed="1"/>
      <edge id="20742" label="0101011000 (1) 0101011100" source="15221" target="14969" cy:directed="1"/>
      <edge id="20741" label="0101011000 (1) 0101001000" source="15221" target="15202" cy:directed="1"/>
      <edge id="20740" label="0101011000 (1) 0101111000" source="15221" target="15104" cy:directed="1"/>
      <edge id="20739" label="0101011000 (1) 0001011000" source="15221" target="15227" cy:directed="1"/>
      <edge id="20738" label="0101011000 (1) 1101011000" source="15221" target="15218" cy:directed="1"/>
      <edge id="20737" label="1101010001 (1) 1101010000" source="15220" target="15259" cy:directed="1"/>
      <edge id="20736" label="1101010001 (1) 1101010011" source="15220" target="14735" cy:directed="1"/>
      <edge id="20735" label="1101010001 (1) 1101010101" source="15220" target="14852" cy:directed="1"/>
      <edge id="20734" label="1101010001 (1) 1101011001" source="15220" target="14968" cy:directed="1"/>
      <edge id="20733" label="1101010001 (1) 1101000001" source="15220" target="15329" cy:directed="1"/>
      <edge id="20732" label="1101010001 (1) 1101110001" source="15220" target="15107" cy:directed="1"/>
      <edge id="20731" label="1101010001 (1) 1001010001" source="15220" target="15226" cy:directed="1"/>
      <edge id="20730" label="1101010001 (1) 0101010001" source="15220" target="15223" cy:directed="1"/>
      <edge id="20729" label="1101010010 (1) 1101010011" source="15219" target="14735" cy:directed="1"/>
      <edge id="20728" label="1101010010 (1) 1101000010" source="15219" target="15328" cy:directed="1"/>
      <edge id="20727" label="1101010010 (1) 1101110010" source="15219" target="14785" cy:directed="1"/>
      <edge id="20726" label="1101010010 (1) 1001010010" source="15219" target="15225" cy:directed="1"/>
      <edge id="20725" label="1101010010 (1) 0101010010" source="15219" target="15222" cy:directed="1"/>
      <edge id="20724" label="1101011000 (1) 1101011001" source="15218" target="14968" cy:directed="1"/>
      <edge id="20723" label="1101011000 (1) 1101011010" source="15218" target="14967" cy:directed="1"/>
      <edge id="20722" label="1101011000 (1) 1101011100" source="15218" target="14966" cy:directed="1"/>
      <edge id="20721" label="1101011000 (1) 1101001000" source="15218" target="15206" cy:directed="1"/>
      <edge id="20720" label="1101011000 (1) 1101111000" source="15218" target="15106" cy:directed="1"/>
      <edge id="20719" label="1101011000 (1) 1001011000" source="15218" target="15224" cy:directed="1"/>
      <edge id="20718" label="1101011000 (1) 0101011000" source="15218" target="15221" cy:directed="1"/>
      <edge id="20717" label="1000001000 (1) 1000001001" source="15217" target="15216" cy:directed="1"/>
      <edge id="20716" label="1000001000 (1) 1000001010" source="15217" target="15215" cy:directed="1"/>
      <edge id="20715" label="1000001000 (1) 1000000000" source="15217" target="15357" cy:directed="1"/>
      <edge id="20714" label="1000001000 (1) 1001001000" source="15217" target="15214" cy:directed="1"/>
      <edge id="20713" label="1000001000 (1) 1100001000" source="15217" target="15213" cy:directed="1"/>
      <edge id="20712" label="1000001000 (1) 0000001000" source="15217" target="15212" cy:directed="1"/>
      <edge id="20711" label="1000001001 (1) 1000001000" source="15216" target="15217" cy:directed="1"/>
      <edge id="20710" label="1000001001 (1) 1000001011" source="15216" target="14724" cy:directed="1"/>
      <edge id="20709" label="1000001001 (1) 1000001101" source="15216" target="14844" cy:directed="1"/>
      <edge id="20708" label="1000001001 (1) 1000000001" source="15216" target="15356" cy:directed="1"/>
      <edge id="20707" label="1000001001 (1) 1001001001" source="15216" target="15159" cy:directed="1"/>
      <edge id="20706" label="1000001001 (1) 1100001001" source="15216" target="15208" cy:directed="1"/>
      <edge id="20705" label="1000001001 (1) 0000001001" source="15216" target="15211" cy:directed="1"/>
      <edge id="20704" label="1000001010 (1) 1000001011" source="15215" target="14724" cy:directed="1"/>
      <edge id="20703" label="1000001010 (1) 1000000010" source="15215" target="15355" cy:directed="1"/>
      <edge id="20702" label="1000001010 (1) 1001001010" source="15215" target="15158" cy:directed="1"/>
      <edge id="20701" label="1000001010 (1) 1100001010" source="15215" target="15207" cy:directed="1"/>
      <edge id="20700" label="1000001010 (1) 0000001010" source="15215" target="15210" cy:directed="1"/>
      <edge id="20699" label="1001001000 (1) 1001001001" source="15214" target="15159" cy:directed="1"/>
      <edge id="20698" label="1001001000 (1) 1001001010" source="15214" target="15158" cy:directed="1"/>
      <edge id="20697" label="1001001000 (1) 1001000000" source="15214" target="15354" cy:directed="1"/>
      <edge id="20696" label="1001001000 (1) 1101001000" source="15214" target="15206" cy:directed="1"/>
      <edge id="20695" label="1001001000 (1) 0001001000" source="15214" target="15209" cy:directed="1"/>
      <edge id="20694" label="1100001000 (1) 1100001001" source="15213" target="15208" cy:directed="1"/>
      <edge id="20693" label="1100001000 (1) 1100001010" source="15213" target="15207" cy:directed="1"/>
      <edge id="20692" label="1100001000 (1) 1100000000" source="15213" target="15353" cy:directed="1"/>
      <edge id="20691" label="1100001000 (1) 1101001000" source="15213" target="15206" cy:directed="1"/>
      <edge id="20690" label="1100001000 (1) 0100001000" source="15213" target="15205" cy:directed="1"/>
      <edge id="20689" label="0000001000 (1) 0000001001" source="15212" target="15211" cy:directed="1"/>
      <edge id="20688" label="0000001000 (1) 0000001010" source="15212" target="15210" cy:directed="1"/>
      <edge id="20687" label="0000001000 (1) 0000000000" source="15212" target="15361" cy:directed="1"/>
      <edge id="20686" label="0000001000 (1) 0001001000" source="15212" target="15209" cy:directed="1"/>
      <edge id="20685" label="0000001000 (1) 1000001000" source="15212" target="15217" cy:directed="1"/>
      <edge id="20684" label="0000001001 (1) 0000001000" source="15211" target="15212" cy:directed="1"/>
      <edge id="20683" label="0000001001 (1) 0000001011" source="15211" target="14725" cy:directed="1"/>
      <edge id="20682" label="0000001001 (1) 0000001101" source="15211" target="14849" cy:directed="1"/>
      <edge id="20681" label="0000001001 (1) 0000000001" source="15211" target="15360" cy:directed="1"/>
      <edge id="20680" label="0000001001 (1) 0001001001" source="15211" target="15161" cy:directed="1"/>
      <edge id="20679" label="0000001001 (1) 1000001001" source="15211" target="15216" cy:directed="1"/>
      <edge id="20678" label="0000001010 (1) 0000001011" source="15210" target="14725" cy:directed="1"/>
      <edge id="20677" label="0000001010 (1) 0000000010" source="15210" target="15359" cy:directed="1"/>
      <edge id="20676" label="0000001010 (1) 0001001010" source="15210" target="15160" cy:directed="1"/>
      <edge id="20675" label="0000001010 (1) 1000001010" source="15210" target="15215" cy:directed="1"/>
      <edge id="20674" label="0001001000 (1) 0001001001" source="15209" target="15161" cy:directed="1"/>
      <edge id="20673" label="0001001000 (1) 0001001010" source="15209" target="15160" cy:directed="1"/>
      <edge id="20672" label="0001001000 (1) 0001000000" source="15209" target="15358" cy:directed="1"/>
      <edge id="20671" label="0001001000 (1) 1001001000" source="15209" target="15214" cy:directed="1"/>
      <edge id="20670" label="1100001001 (1) 1100001000" source="15208" target="15213" cy:directed="1"/>
      <edge id="20669" label="1100001001 (1) 1100001011" source="15208" target="14723" cy:directed="1"/>
      <edge id="20668" label="1100001001 (1) 1100001101" source="15208" target="14830" cy:directed="1"/>
      <edge id="20667" label="1100001001 (1) 1100000001" source="15208" target="15348" cy:directed="1"/>
      <edge id="20666" label="1100001001 (1) 1101001001" source="15208" target="15150" cy:directed="1"/>
      <edge id="20665" label="1100001001 (1) 0100001001" source="15208" target="15204" cy:directed="1"/>
      <edge id="20664" label="1100001010 (1) 1100001011" source="15207" target="14723" cy:directed="1"/>
      <edge id="20663" label="1100001010 (1) 1100000010" source="15207" target="15347" cy:directed="1"/>
      <edge id="20662" label="1100001010 (1) 1101001010" source="15207" target="15149" cy:directed="1"/>
      <edge id="20661" label="1100001010 (1) 0100001010" source="15207" target="15203" cy:directed="1"/>
      <edge id="20660" label="1101001000 (1) 1101001001" source="15206" target="15150" cy:directed="1"/>
      <edge id="20659" label="1101001000 (1) 1101001010" source="15206" target="15149" cy:directed="1"/>
      <edge id="20658" label="1101001000 (1) 1101000000" source="15206" target="15346" cy:directed="1"/>
      <edge id="20657" label="1101001000 (1) 1101101000" source="15206" target="15148" cy:directed="1"/>
      <edge id="20656" label="1101001000 (1) 0101001000" source="15206" target="15202" cy:directed="1"/>
      <edge id="20655" label="0100001000 (1) 0100001001" source="15205" target="15204" cy:directed="1"/>
      <edge id="20654" label="0100001000 (1) 0100001010" source="15205" target="15203" cy:directed="1"/>
      <edge id="20653" label="0100001000 (1) 0100000000" source="15205" target="15352" cy:directed="1"/>
      <edge id="20652" label="0100001000 (1) 0101001000" source="15205" target="15202" cy:directed="1"/>
      <edge id="20651" label="0100001000 (1) 0000001000" source="15205" target="15212" cy:directed="1"/>
      <edge id="20650" label="0100001000 (1) 1100001000" source="15205" target="15213" cy:directed="1"/>
      <edge id="20649" label="0100001001 (1) 0100001000" source="15204" target="15205" cy:directed="1"/>
      <edge id="20648" label="0100001001 (1) 0100001011" source="15204" target="14722" cy:directed="1"/>
      <edge id="20647" label="0100001001 (1) 0100001101" source="15204" target="14826" cy:directed="1"/>
      <edge id="20646" label="0100001001 (1) 0100000001" source="15204" target="15351" cy:directed="1"/>
      <edge id="20645" label="0100001001 (1) 0101001001" source="15204" target="15153" cy:directed="1"/>
      <edge id="20644" label="0100001001 (1) 0000001001" source="15204" target="15211" cy:directed="1"/>
      <edge id="20643" label="0100001001 (1) 1100001001" source="15204" target="15208" cy:directed="1"/>
      <edge id="20642" label="0100001010 (1) 0100001011" source="15203" target="14722" cy:directed="1"/>
      <edge id="20641" label="0100001010 (1) 0100000010" source="15203" target="15350" cy:directed="1"/>
      <edge id="20640" label="0100001010 (1) 0101001010" source="15203" target="15152" cy:directed="1"/>
      <edge id="20639" label="0100001010 (1) 0000001010" source="15203" target="15210" cy:directed="1"/>
      <edge id="20638" label="0100001010 (1) 1100001010" source="15203" target="15207" cy:directed="1"/>
      <edge id="20637" label="0101001000 (1) 0101001001" source="15202" target="15153" cy:directed="1"/>
      <edge id="20636" label="0101001000 (1) 0101001010" source="15202" target="15152" cy:directed="1"/>
      <edge id="20635" label="0101001000 (1) 0101000000" source="15202" target="15349" cy:directed="1"/>
      <edge id="20634" label="0101001000 (1) 0101101000" source="15202" target="15151" cy:directed="1"/>
      <edge id="20633" label="0101001000 (1) 0001001000" source="15202" target="15209" cy:directed="1"/>
      <edge id="20632" label="0101001000 (1) 1101001000" source="15202" target="15206" cy:directed="1"/>
      <edge id="20631" label="0011010000 (1) 0011010001" source="15201" target="15200" cy:directed="1"/>
      <edge id="20630" label="0011010000 (1) 0011010010" source="15201" target="15199" cy:directed="1"/>
      <edge id="20629" label="0011010000 (1) 0011011000" source="15201" target="15198" cy:directed="1"/>
      <edge id="20628" label="0011010000 (1) 0011000000" source="15201" target="15323" cy:directed="1"/>
      <edge id="20627" label="0011010000 (1) 0010010000" source="15201" target="15245" cy:directed="1"/>
      <edge id="20626" label="0011010000 (1) 0001010000" source="15201" target="15268" cy:directed="1"/>
      <edge id="20625" label="0011010000 (1) 1011010000" source="15201" target="15197" cy:directed="1"/>
      <edge id="20624" label="0011010001 (1) 0011010000" source="15200" target="15201" cy:directed="1"/>
      <edge id="20623" label="0011010001 (1) 0011010011" source="15200" target="14712" cy:directed="1"/>
      <edge id="20622" label="0011010001 (1) 0011010101" source="15200" target="14817" cy:directed="1"/>
      <edge id="20621" label="0011010001 (1) 0011011001" source="15200" target="14949" cy:directed="1"/>
      <edge id="20620" label="0011010001 (1) 0011000001" source="15200" target="15322" cy:directed="1"/>
      <edge id="20619" label="0011010001 (1) 0010010001" source="15200" target="15244" cy:directed="1"/>
      <edge id="20618" label="0011010001 (1) 0001010001" source="15200" target="15229" cy:directed="1"/>
      <edge id="20617" label="0011010001 (1) 1011010001" source="15200" target="15196" cy:directed="1"/>
      <edge id="20616" label="0011010010 (1) 0011010011" source="15199" target="14712" cy:directed="1"/>
      <edge id="20615" label="0011010010 (1) 0011000010" source="15199" target="15321" cy:directed="1"/>
      <edge id="20614" label="0011010010 (1) 0010010010" source="15199" target="15243" cy:directed="1"/>
      <edge id="20613" label="0011010010 (1) 0001010010" source="15199" target="15228" cy:directed="1"/>
      <edge id="20612" label="0011010010 (1) 1011010010" source="15199" target="15195" cy:directed="1"/>
      <edge id="20611" label="0011011000 (1) 0011011001" source="15198" target="14949" cy:directed="1"/>
      <edge id="20610" label="0011011000 (1) 0011011010" source="15198" target="14948" cy:directed="1"/>
      <edge id="20609" label="0011011000 (1) 0011011100" source="15198" target="14947" cy:directed="1"/>
      <edge id="20608" label="0011011000 (1) 0011001000" source="15198" target="15134" cy:directed="1"/>
      <edge id="20607" label="0011011000 (1) 0010011000" source="15198" target="15242" cy:directed="1"/>
      <edge id="20606" label="0011011000 (1) 0001011000" source="15198" target="15227" cy:directed="1"/>
      <edge id="20605" label="0011011000 (1) 1011011000" source="15198" target="15194" cy:directed="1"/>
      <edge id="20604" label="1011010000 (1) 1011010001" source="15197" target="15196" cy:directed="1"/>
      <edge id="20603" label="1011010000 (1) 1011010010" source="15197" target="15195" cy:directed="1"/>
      <edge id="20602" label="1011010000 (1) 1011011000" source="15197" target="15194" cy:directed="1"/>
      <edge id="20601" label="1011010000 (1) 1011000000" source="15197" target="15320" cy:directed="1"/>
      <edge id="20600" label="1011010000 (1) 1010010000" source="15197" target="15249" cy:directed="1"/>
      <edge id="20599" label="1011010000 (1) 1001010000" source="15197" target="15273" cy:directed="1"/>
      <edge id="20598" label="1011010000 (1) 0011010000" source="15197" target="15201" cy:directed="1"/>
      <edge id="20597" label="1011010001 (1) 1011010000" source="15196" target="15197" cy:directed="1"/>
      <edge id="20596" label="1011010001 (1) 1011010011" source="15196" target="14711" cy:directed="1"/>
      <edge id="20595" label="1011010001 (1) 1011010101" source="15196" target="14819" cy:directed="1"/>
      <edge id="20594" label="1011010001 (1) 1011011001" source="15196" target="14946" cy:directed="1"/>
      <edge id="20593" label="1011010001 (1) 1011000001" source="15196" target="15319" cy:directed="1"/>
      <edge id="20592" label="1011010001 (1) 1010010001" source="15196" target="15248" cy:directed="1"/>
      <edge id="20591" label="1011010001 (1) 1001010001" source="15196" target="15226" cy:directed="1"/>
      <edge id="20590" label="1011010001 (1) 0011010001" source="15196" target="15200" cy:directed="1"/>
      <edge id="20589" label="1011010010 (1) 1011010011" source="15195" target="14711" cy:directed="1"/>
      <edge id="20588" label="1011010010 (1) 1011000010" source="15195" target="15318" cy:directed="1"/>
      <edge id="20587" label="1011010010 (1) 1010010010" source="15195" target="15247" cy:directed="1"/>
      <edge id="20586" label="1011010010 (1) 1001010010" source="15195" target="15225" cy:directed="1"/>
      <edge id="20585" label="1011010010 (1) 0011010010" source="15195" target="15199" cy:directed="1"/>
      <edge id="20584" label="1011011000 (1) 1011011001" source="15194" target="14946" cy:directed="1"/>
      <edge id="20583" label="1011011000 (1) 1011011010" source="15194" target="14945" cy:directed="1"/>
      <edge id="20582" label="1011011000 (1) 1011011100" source="15194" target="14944" cy:directed="1"/>
      <edge id="20581" label="1011011000 (1) 1011001000" source="15194" target="15131" cy:directed="1"/>
      <edge id="20580" label="1011011000 (1) 1010011000" source="15194" target="15246" cy:directed="1"/>
      <edge id="20579" label="1011011000 (1) 1001011000" source="15194" target="15224" cy:directed="1"/>
      <edge id="20578" label="1011011000 (1) 0011011000" source="15194" target="15198" cy:directed="1"/>
      <edge id="20577" label="0111010000 (1) 0111010001" source="15193" target="15192" cy:directed="1"/>
      <edge id="20576" label="0111010000 (1) 0111010010" source="15193" target="15191" cy:directed="1"/>
      <edge id="20575" label="0111010000 (1) 0111011000" source="15193" target="15190" cy:directed="1"/>
      <edge id="20574" label="0111010000 (1) 0111000000" source="15193" target="15313" cy:directed="1"/>
      <edge id="20573" label="0111010000 (1) 0111110000" source="15193" target="15238" cy:directed="1"/>
      <edge id="20572" label="0111010000 (1) 0110010000" source="15193" target="15237" cy:directed="1"/>
      <edge id="20571" label="0111010000 (1) 0101010000" source="15193" target="15254" cy:directed="1"/>
      <edge id="20570" label="0111010000 (1) 0011010000" source="15193" target="15201" cy:directed="1"/>
      <edge id="20569" label="0111010000 (1) 1111010000" source="15193" target="15189" cy:directed="1"/>
      <edge id="20568" label="0111010001 (1) 0111010000" source="15192" target="15193" cy:directed="1"/>
      <edge id="20567" label="0111010001 (1) 0111010011" source="15192" target="14705" cy:directed="1"/>
      <edge id="20566" label="0111010001 (1) 0111010101" source="15192" target="14814" cy:directed="1"/>
      <edge id="20565" label="0111010001 (1) 0111011001" source="15192" target="14924" cy:directed="1"/>
      <edge id="20564" label="0111010001 (1) 0111000001" source="15192" target="15312" cy:directed="1"/>
      <edge id="20563" label="0111010001 (1) 0111110001" source="15192" target="15071" cy:directed="1"/>
      <edge id="20562" label="0111010001 (1) 0110010001" source="15192" target="15236" cy:directed="1"/>
      <edge id="20561" label="0111010001 (1) 0101010001" source="15192" target="15223" cy:directed="1"/>
      <edge id="20560" label="0111010001 (1) 0011010001" source="15192" target="15200" cy:directed="1"/>
      <edge id="20559" label="0111010001 (1) 1111010001" source="15192" target="15188" cy:directed="1"/>
      <edge id="20558" label="0111010010 (1) 0111010011" source="15191" target="14705" cy:directed="1"/>
      <edge id="20557" label="0111010010 (1) 0111000010" source="15191" target="15311" cy:directed="1"/>
      <edge id="20556" label="0111010010 (1) 0111110010" source="15191" target="14757" cy:directed="1"/>
      <edge id="20555" label="0111010010 (1) 0110010010" source="15191" target="15235" cy:directed="1"/>
      <edge id="20554" label="0111010010 (1) 0101010010" source="15191" target="15222" cy:directed="1"/>
      <edge id="20553" label="0111010010 (1) 0011010010" source="15191" target="15199" cy:directed="1"/>
      <edge id="20552" label="0111010010 (1) 1111010010" source="15191" target="15187" cy:directed="1"/>
      <edge id="20551" label="0111011000 (1) 0111011001" source="15190" target="14924" cy:directed="1"/>
      <edge id="20550" label="0111011000 (1) 0111011010" source="15190" target="14923" cy:directed="1"/>
      <edge id="20549" label="0111011000 (1) 0111011100" source="15190" target="14922" cy:directed="1"/>
      <edge id="20548" label="0111011000 (1) 0111001000" source="15190" target="15111" cy:directed="1"/>
      <edge id="20547" label="0111011000 (1) 0111111000" source="15190" target="15070" cy:directed="1"/>
      <edge id="20546" label="0111011000 (1) 0110011000" source="15190" target="15234" cy:directed="1"/>
      <edge id="20545" label="0111011000 (1) 0101011000" source="15190" target="15221" cy:directed="1"/>
      <edge id="20544" label="0111011000 (1) 0011011000" source="15190" target="15198" cy:directed="1"/>
      <edge id="20543" label="0111011000 (1) 1111011000" source="15190" target="15186" cy:directed="1"/>
      <edge id="20542" label="1111010000 (1) 1111010001" source="15189" target="15188" cy:directed="1"/>
      <edge id="20541" label="1111010000 (1) 1111010010" source="15189" target="15187" cy:directed="1"/>
      <edge id="20540" label="1111010000 (1) 1111011000" source="15189" target="15186" cy:directed="1"/>
      <edge id="20539" label="1111010000 (1) 1111000000" source="15189" target="15317" cy:directed="1"/>
      <edge id="20538" label="1111010000 (1) 1111110000" source="15189" target="15240" cy:directed="1"/>
      <edge id="20537" label="1111010000 (1) 1110010000" source="15189" target="15233" cy:directed="1"/>
      <edge id="20536" label="1111010000 (1) 1101010000" source="15189" target="15259" cy:directed="1"/>
      <edge id="20535" label="1111010000 (1) 1011010000" source="15189" target="15197" cy:directed="1"/>
      <edge id="20534" label="1111010000 (1) 0111010000" source="15189" target="15193" cy:directed="1"/>
      <edge id="20533" label="1111010001 (1) 1111010000" source="15188" target="15189" cy:directed="1"/>
      <edge id="20532" label="1111010001 (1) 1111010011" source="15188" target="14704" cy:directed="1"/>
      <edge id="20531" label="1111010001 (1) 1111010101" source="15188" target="14811" cy:directed="1"/>
      <edge id="20530" label="1111010001 (1) 1111011001" source="15188" target="14927" cy:directed="1"/>
      <edge id="20529" label="1111010001 (1) 1111000001" source="15188" target="15316" cy:directed="1"/>
      <edge id="20528" label="1111010001 (1) 1111110001" source="15188" target="15073" cy:directed="1"/>
      <edge id="20527" label="1111010001 (1) 1110010001" source="15188" target="15232" cy:directed="1"/>
      <edge id="20526" label="1111010001 (1) 1101010001" source="15188" target="15220" cy:directed="1"/>
      <edge id="20525" label="1111010001 (1) 1011010001" source="15188" target="15196" cy:directed="1"/>
      <edge id="20524" label="1111010001 (1) 0111010001" source="15188" target="15192" cy:directed="1"/>
      <edge id="20523" label="1111010010 (1) 1111010011" source="15187" target="14704" cy:directed="1"/>
      <edge id="20522" label="1111010010 (1) 1111000010" source="15187" target="15315" cy:directed="1"/>
      <edge id="20521" label="1111010010 (1) 1111110010" source="15187" target="14764" cy:directed="1"/>
      <edge id="20520" label="1111010010 (1) 1110010010" source="15187" target="15231" cy:directed="1"/>
      <edge id="20519" label="1111010010 (1) 1101010010" source="15187" target="15219" cy:directed="1"/>
      <edge id="20518" label="1111010010 (1) 1011010010" source="15187" target="15195" cy:directed="1"/>
      <edge id="20517" label="1111010010 (1) 0111010010" source="15187" target="15191" cy:directed="1"/>
      <edge id="20516" label="1111011000 (1) 1111011001" source="15186" target="14927" cy:directed="1"/>
      <edge id="20515" label="1111011000 (1) 1111011010" source="15186" target="14926" cy:directed="1"/>
      <edge id="20514" label="1111011000 (1) 1111011100" source="15186" target="14925" cy:directed="1"/>
      <edge id="20513" label="1111011000 (1) 1111001000" source="15186" target="15128" cy:directed="1"/>
      <edge id="20512" label="1111011000 (1) 1111111000" source="15186" target="15072" cy:directed="1"/>
      <edge id="20511" label="1111011000 (1) 1110011000" source="15186" target="15230" cy:directed="1"/>
      <edge id="20510" label="1111011000 (1) 1101011000" source="15186" target="15218" cy:directed="1"/>
      <edge id="20509" label="1111011000 (1) 1011011000" source="15186" target="15194" cy:directed="1"/>
      <edge id="20508" label="1111011000 (1) 0111011000" source="15186" target="15190" cy:directed="1"/>
      <edge id="20507" label="1010001000 (1) 1010001001" source="15185" target="15184" cy:directed="1"/>
      <edge id="20506" label="1010001000 (1) 1010001010" source="15185" target="15183" cy:directed="1"/>
      <edge id="20505" label="1010001000 (1) 1010000000" source="15185" target="15345" cy:directed="1"/>
      <edge id="20504" label="1010001000 (1) 1000001000" source="15185" target="15217" cy:directed="1"/>
      <edge id="20503" label="1010001000 (1) 1110001000" source="15185" target="15182" cy:directed="1"/>
      <edge id="20502" label="1010001000 (1) 0010001000" source="15185" target="15181" cy:directed="1"/>
      <edge id="20501" label="1010001001 (1) 1010001000" source="15184" target="15185" cy:directed="1"/>
      <edge id="20500" label="1010001001 (1) 1010001011" source="15184" target="14701" cy:directed="1"/>
      <edge id="20499" label="1010001001 (1) 1010001101" source="15184" target="14804" cy:directed="1"/>
      <edge id="20498" label="1010001001 (1) 1010000001" source="15184" target="15344" cy:directed="1"/>
      <edge id="20497" label="1010001001 (1) 1000001001" source="15184" target="15216" cy:directed="1"/>
      <edge id="20496" label="1010001001 (1) 1110001001" source="15184" target="15174" cy:directed="1"/>
      <edge id="20495" label="1010001001 (1) 0010001001" source="15184" target="15180" cy:directed="1"/>
      <edge id="20494" label="1010001010 (1) 1010001011" source="15183" target="14701" cy:directed="1"/>
      <edge id="20493" label="1010001010 (1) 1010000010" source="15183" target="15343" cy:directed="1"/>
      <edge id="20492" label="1010001010 (1) 1000001010" source="15183" target="15215" cy:directed="1"/>
      <edge id="20491" label="1010001010 (1) 1110001010" source="15183" target="15173" cy:directed="1"/>
      <edge id="20490" label="1010001010 (1) 0010001010" source="15183" target="15179" cy:directed="1"/>
      <edge id="20489" label="1110001000 (1) 1110001001" source="15182" target="15174" cy:directed="1"/>
      <edge id="20488" label="1110001000 (1) 1110001010" source="15182" target="15173" cy:directed="1"/>
      <edge id="20487" label="1110001000 (1) 1110000000" source="15182" target="15342" cy:directed="1"/>
      <edge id="20486" label="1110001000 (1) 1100001000" source="15182" target="15213" cy:directed="1"/>
      <edge id="20485" label="1110001000 (1) 0110001000" source="15182" target="15172" cy:directed="1"/>
      <edge id="20484" label="0010001000 (1) 0010001001" source="15181" target="15180" cy:directed="1"/>
      <edge id="20483" label="0010001000 (1) 0010001010" source="15181" target="15179" cy:directed="1"/>
      <edge id="20482" label="0010001000 (1) 0010000000" source="15181" target="15341" cy:directed="1"/>
      <edge id="20481" label="0010001000 (1) 0000001000" source="15181" target="15212" cy:directed="1"/>
      <edge id="20480" label="0010001000 (1) 1010001000" source="15181" target="15185" cy:directed="1"/>
      <edge id="20479" label="0010001001 (1) 0010001000" source="15180" target="15181" cy:directed="1"/>
      <edge id="20478" label="0010001001 (1) 0010001011" source="15180" target="14702" cy:directed="1"/>
      <edge id="20477" label="0010001001 (1) 0010001101" source="15180" target="14801" cy:directed="1"/>
      <edge id="20476" label="0010001001 (1) 0010000001" source="15180" target="15340" cy:directed="1"/>
      <edge id="20475" label="0010001001 (1) 0000001001" source="15180" target="15211" cy:directed="1"/>
      <edge id="20474" label="0010001001 (1) 1010001001" source="15180" target="15184" cy:directed="1"/>
      <edge id="20473" label="0010001010 (1) 0010001011" source="15179" target="14702" cy:directed="1"/>
      <edge id="20472" label="0010001010 (1) 0010000010" source="15179" target="15339" cy:directed="1"/>
      <edge id="20471" label="0010001010 (1) 0000001010" source="15179" target="15210" cy:directed="1"/>
      <edge id="20470" label="0010001010 (1) 1010001010" source="15179" target="15183" cy:directed="1"/>
      <edge id="20469" label="1000110001 (1) 1000110000" source="15178" target="15307" cy:directed="1"/>
      <edge id="20468" label="1000110001 (1) 1000110101" source="15178" target="14796" cy:directed="1"/>
      <edge id="20467" label="1000110001 (1) 1000111001" source="15178" target="14920" cy:directed="1"/>
      <edge id="20466" label="1000110001 (1) 1000010001" source="15178" target="15276" cy:directed="1"/>
      <edge id="20465" label="1000110001 (1) 1001110001" source="15178" target="15125" cy:directed="1"/>
      <edge id="20464" label="1000110001 (1) 1010110001" source="15178" target="15163" cy:directed="1"/>
      <edge id="20463" label="1000110001 (1) 0000110001" source="15178" target="15176" cy:directed="1"/>
      <edge id="20462" label="1000111000 (1) 1000111001" source="15177" target="14920" cy:directed="1"/>
      <edge id="20461" label="1000111000 (1) 1000111100" source="15177" target="14919" cy:directed="1"/>
      <edge id="20460" label="1000111000 (1) 1000011000" source="15177" target="15274" cy:directed="1"/>
      <edge id="20459" label="1000111000 (1) 1001111000" source="15177" target="15124" cy:directed="1"/>
      <edge id="20458" label="1000111000 (1) 1010111000" source="15177" target="15162" cy:directed="1"/>
      <edge id="20457" label="1000111000 (1) 0000111000" source="15177" target="15175" cy:directed="1"/>
      <edge id="20456" label="0000110001 (1) 0000110000" source="15176" target="15301" cy:directed="1"/>
      <edge id="20455" label="0000110001 (1) 0000110101" source="15176" target="14790" cy:directed="1"/>
      <edge id="20454" label="0000110001 (1) 0000111001" source="15176" target="14917" cy:directed="1"/>
      <edge id="20453" label="0000110001 (1) 0000010001" source="15176" target="15271" cy:directed="1"/>
      <edge id="20452" label="0000110001 (1) 0001110001" source="15176" target="15127" cy:directed="1"/>
      <edge id="20451" label="0000110001 (1) 0010110001" source="15176" target="15165" cy:directed="1"/>
      <edge id="20450" label="0000110001 (1) 1000110001" source="15176" target="15178" cy:directed="1"/>
      <edge id="20449" label="0000111000 (1) 0000111001" source="15175" target="14917" cy:directed="1"/>
      <edge id="20448" label="0000111000 (1) 0000111100" source="15175" target="14916" cy:directed="1"/>
      <edge id="20447" label="0000111000 (1) 0000011000" source="15175" target="15269" cy:directed="1"/>
      <edge id="20446" label="0000111000 (1) 0001111000" source="15175" target="15126" cy:directed="1"/>
      <edge id="20445" label="0000111000 (1) 0010111000" source="15175" target="15164" cy:directed="1"/>
      <edge id="20444" label="0000111000 (1) 1000111000" source="15175" target="15177" cy:directed="1"/>
      <edge id="20443" label="1110001001 (1) 1110001000" source="15174" target="15182" cy:directed="1"/>
      <edge id="20442" label="1110001001 (1) 1110001011" source="15174" target="14696" cy:directed="1"/>
      <edge id="20441" label="1110001001 (1) 1110001101" source="15174" target="14784" cy:directed="1"/>
      <edge id="20440" label="1110001001 (1) 1110000001" source="15174" target="15338" cy:directed="1"/>
      <edge id="20439" label="1110001001 (1) 1100001001" source="15174" target="15208" cy:directed="1"/>
      <edge id="20438" label="1110001001 (1) 0110001001" source="15174" target="15171" cy:directed="1"/>
      <edge id="20437" label="1110001010 (1) 1110001011" source="15173" target="14696" cy:directed="1"/>
      <edge id="20436" label="1110001010 (1) 1110000010" source="15173" target="15337" cy:directed="1"/>
      <edge id="20435" label="1110001010 (1) 1100001010" source="15173" target="15207" cy:directed="1"/>
      <edge id="20434" label="1110001010 (1) 0110001010" source="15173" target="15170" cy:directed="1"/>
      <edge id="20433" label="0110001000 (1) 0110001001" source="15172" target="15171" cy:directed="1"/>
      <edge id="20432" label="0110001000 (1) 0110001010" source="15172" target="15170" cy:directed="1"/>
      <edge id="20431" label="0110001000 (1) 0110000000" source="15172" target="15336" cy:directed="1"/>
      <edge id="20430" label="0110001000 (1) 0100001000" source="15172" target="15205" cy:directed="1"/>
      <edge id="20429" label="0110001000 (1) 0010001000" source="15172" target="15181" cy:directed="1"/>
      <edge id="20428" label="0110001000 (1) 1110001000" source="15172" target="15182" cy:directed="1"/>
      <edge id="20427" label="0110001001 (1) 0110001000" source="15171" target="15172" cy:directed="1"/>
      <edge id="20426" label="0110001001 (1) 0110001011" source="15171" target="14697" cy:directed="1"/>
      <edge id="20425" label="0110001001 (1) 0110001101" source="15171" target="14781" cy:directed="1"/>
      <edge id="20424" label="0110001001 (1) 0110000001" source="15171" target="15335" cy:directed="1"/>
      <edge id="20423" label="0110001001 (1) 0100001001" source="15171" target="15204" cy:directed="1"/>
      <edge id="20422" label="0110001001 (1) 0010001001" source="15171" target="15180" cy:directed="1"/>
      <edge id="20421" label="0110001001 (1) 1110001001" source="15171" target="15174" cy:directed="1"/>
      <edge id="20420" label="0110001010 (1) 0110001011" source="15170" target="14697" cy:directed="1"/>
      <edge id="20419" label="0110001010 (1) 0110000010" source="15170" target="15334" cy:directed="1"/>
      <edge id="20418" label="0110001010 (1) 0100001010" source="15170" target="15203" cy:directed="1"/>
      <edge id="20417" label="0110001010 (1) 0010001010" source="15170" target="15179" cy:directed="1"/>
      <edge id="20416" label="0110001010 (1) 1110001010" source="15170" target="15173" cy:directed="1"/>
      <edge id="20415" label="0100110001 (1) 0100110000" source="15169" target="15296" cy:directed="1"/>
      <edge id="20414" label="0100110001 (1) 0100110101" source="15169" target="14779" cy:directed="1"/>
      <edge id="20413" label="0100110001 (1) 0100111001" source="15169" target="14913" cy:directed="1"/>
      <edge id="20412" label="0100110001 (1) 0100010001" source="15169" target="15257" cy:directed="1"/>
      <edge id="20411" label="0100110001 (1) 0101110001" source="15169" target="15105" cy:directed="1"/>
      <edge id="20410" label="0100110001 (1) 0000110001" source="15169" target="15176" cy:directed="1"/>
      <edge id="20409" label="0100110001 (1) 1100110001" source="15169" target="15167" cy:directed="1"/>
      <edge id="20408" label="0100111000 (1) 0100111001" source="15168" target="14913" cy:directed="1"/>
      <edge id="20407" label="0100111000 (1) 0100111100" source="15168" target="14912" cy:directed="1"/>
      <edge id="20406" label="0100111000 (1) 0100011000" source="15168" target="15255" cy:directed="1"/>
      <edge id="20405" label="0100111000 (1) 0101111000" source="15168" target="15104" cy:directed="1"/>
      <edge id="20404" label="0100111000 (1) 0000111000" source="15168" target="15175" cy:directed="1"/>
      <edge id="20403" label="0100111000 (1) 1100111000" source="15168" target="15166" cy:directed="1"/>
      <edge id="20402" label="1100110001 (1) 1100110000" source="15167" target="15294" cy:directed="1"/>
      <edge id="20401" label="1100110001 (1) 1100110101" source="15167" target="14778" cy:directed="1"/>
      <edge id="20400" label="1100110001 (1) 1100111001" source="15167" target="14907" cy:directed="1"/>
      <edge id="20399" label="1100110001 (1) 1100010001" source="15167" target="15262" cy:directed="1"/>
      <edge id="20398" label="1100110001 (1) 1101110001" source="15167" target="15107" cy:directed="1"/>
      <edge id="20397" label="1100110001 (1) 1000110001" source="15167" target="15178" cy:directed="1"/>
      <edge id="20396" label="1100110001 (1) 0100110001" source="15167" target="15169" cy:directed="1"/>
      <edge id="20395" label="1100111000 (1) 1100111001" source="15166" target="14907" cy:directed="1"/>
      <edge id="20394" label="1100111000 (1) 1100111100" source="15166" target="14906" cy:directed="1"/>
      <edge id="20393" label="1100111000 (1) 1100011000" source="15166" target="15260" cy:directed="1"/>
      <edge id="20392" label="1100111000 (1) 1101111000" source="15166" target="15106" cy:directed="1"/>
      <edge id="20391" label="1100111000 (1) 1000111000" source="15166" target="15177" cy:directed="1"/>
      <edge id="20390" label="1100111000 (1) 0100111000" source="15166" target="15168" cy:directed="1"/>
      <edge id="20389" label="0010110001 (1) 0010110000" source="15165" target="15292" cy:directed="1"/>
      <edge id="20388" label="0010110001 (1) 0010110101" source="15165" target="14766" cy:directed="1"/>
      <edge id="20387" label="0010110001 (1) 0010111001" source="15165" target="14878" cy:directed="1"/>
      <edge id="20386" label="0010110001 (1) 0010010001" source="15165" target="15244" cy:directed="1"/>
      <edge id="20385" label="0010110001 (1) 1010110001" source="15165" target="15163" cy:directed="1"/>
      <edge id="20384" label="0010111000 (1) 0010111001" source="15164" target="14878" cy:directed="1"/>
      <edge id="20383" label="0010111000 (1) 0010111100" source="15164" target="14877" cy:directed="1"/>
      <edge id="20382" label="0010111000 (1) 0010011000" source="15164" target="15242" cy:directed="1"/>
      <edge id="20381" label="0010111000 (1) 1010111000" source="15164" target="15162" cy:directed="1"/>
      <edge id="20380" label="1010110001 (1) 1010110000" source="15163" target="15290" cy:directed="1"/>
      <edge id="20379" label="1010110001 (1) 1010110101" source="15163" target="14767" cy:directed="1"/>
      <edge id="20378" label="1010110001 (1) 1010111001" source="15163" target="14876" cy:directed="1"/>
      <edge id="20377" label="1010110001 (1) 1010010001" source="15163" target="15248" cy:directed="1"/>
      <edge id="20376" label="1010110001 (1) 0010110001" source="15163" target="15165" cy:directed="1"/>
      <edge id="20375" label="1010111000 (1) 1010111001" source="15162" target="14876" cy:directed="1"/>
      <edge id="20374" label="1010111000 (1) 1010111100" source="15162" target="14875" cy:directed="1"/>
      <edge id="20373" label="1010111000 (1) 1010011000" source="15162" target="15246" cy:directed="1"/>
      <edge id="20372" label="1010111000 (1) 0010111000" source="15162" target="15164" cy:directed="1"/>
      <edge id="20371" label="0001001001 (1) 0001001000" source="15161" target="15209" cy:directed="1"/>
      <edge id="20370" label="0001001001 (1) 0001001011" source="15161" target="14684" cy:directed="1"/>
      <edge id="20369" label="0001001001 (1) 0001001101" source="15161" target="14762" cy:directed="1"/>
      <edge id="20368" label="0001001001 (1) 0001000001" source="15161" target="15331" cy:directed="1"/>
      <edge id="20367" label="0001001001 (1) 1001001001" source="15161" target="15159" cy:directed="1"/>
      <edge id="20366" label="0001001010 (1) 0001001011" source="15160" target="14684" cy:directed="1"/>
      <edge id="20365" label="0001001010 (1) 0001000010" source="15160" target="15330" cy:directed="1"/>
      <edge id="20364" label="0001001010 (1) 1001001010" source="15160" target="15158" cy:directed="1"/>
      <edge id="20363" label="1001001001 (1) 1001001000" source="15159" target="15214" cy:directed="1"/>
      <edge id="20362" label="1001001001 (1) 1001001011" source="15159" target="14685" cy:directed="1"/>
      <edge id="20361" label="1001001001 (1) 1001001101" source="15159" target="14756" cy:directed="1"/>
      <edge id="20360" label="1001001001 (1) 1001000001" source="15159" target="15333" cy:directed="1"/>
      <edge id="20359" label="1001001001 (1) 1101001001" source="15159" target="15150" cy:directed="1"/>
      <edge id="20358" label="1001001001 (1) 0001001001" source="15159" target="15161" cy:directed="1"/>
      <edge id="20357" label="1001001010 (1) 1001001011" source="15158" target="14685" cy:directed="1"/>
      <edge id="20356" label="1001001010 (1) 1001000010" source="15158" target="15332" cy:directed="1"/>
      <edge id="20355" label="1001001010 (1) 1101001010" source="15158" target="15149" cy:directed="1"/>
      <edge id="20354" label="1001001010 (1) 0001001010" source="15158" target="15160" cy:directed="1"/>
      <edge id="20353" label="1110110001 (1) 1110110000" source="15157" target="15287" cy:directed="1"/>
      <edge id="20352" label="1110110001 (1) 1110110101" source="15157" target="14746" cy:directed="1"/>
      <edge id="20351" label="1110110001 (1) 1110111001" source="15157" target="14869" cy:directed="1"/>
      <edge id="20350" label="1110110001 (1) 1110010001" source="15157" target="15232" cy:directed="1"/>
      <edge id="20349" label="1110110001 (1) 1100110001" source="15157" target="15167" cy:directed="1"/>
      <edge id="20348" label="1110110001 (1) 1010110001" source="15157" target="15163" cy:directed="1"/>
      <edge id="20347" label="1110110001 (1) 0110110001" source="15157" target="15155" cy:directed="1"/>
      <edge id="20346" label="1110111000 (1) 1110111001" source="15156" target="14869" cy:directed="1"/>
      <edge id="20345" label="1110111000 (1) 1110111100" source="15156" target="14868" cy:directed="1"/>
      <edge id="20344" label="1110111000 (1) 1110011000" source="15156" target="15230" cy:directed="1"/>
      <edge id="20343" label="1110111000 (1) 1100111000" source="15156" target="15166" cy:directed="1"/>
      <edge id="20342" label="1110111000 (1) 1010111000" source="15156" target="15162" cy:directed="1"/>
      <edge id="20341" label="1110111000 (1) 0110111000" source="15156" target="15154" cy:directed="1"/>
      <edge id="20340" label="0110110001 (1) 0110110000" source="15155" target="15284" cy:directed="1"/>
      <edge id="20339" label="0110110001 (1) 0110110101" source="15155" target="14747" cy:directed="1"/>
      <edge id="20338" label="0110110001 (1) 0110111001" source="15155" target="14867" cy:directed="1"/>
      <edge id="20337" label="0110110001 (1) 0110010001" source="15155" target="15236" cy:directed="1"/>
      <edge id="20336" label="0110110001 (1) 0100110001" source="15155" target="15169" cy:directed="1"/>
      <edge id="20335" label="0110110001 (1) 0010110001" source="15155" target="15165" cy:directed="1"/>
      <edge id="20334" label="0110110001 (1) 1110110001" source="15155" target="15157" cy:directed="1"/>
      <edge id="20333" label="0110111000 (1) 0110111001" source="15154" target="14867" cy:directed="1"/>
      <edge id="20332" label="0110111000 (1) 0110111100" source="15154" target="14866" cy:directed="1"/>
      <edge id="20331" label="0110111000 (1) 0110011000" source="15154" target="15234" cy:directed="1"/>
      <edge id="20330" label="0110111000 (1) 0100111000" source="15154" target="15168" cy:directed="1"/>
      <edge id="20329" label="0110111000 (1) 0010111000" source="15154" target="15164" cy:directed="1"/>
      <edge id="20328" label="0110111000 (1) 1110111000" source="15154" target="15156" cy:directed="1"/>
      <edge id="20327" label="0101001001 (1) 0101001000" source="15153" target="15202" cy:directed="1"/>
      <edge id="20326" label="0101001001 (1) 0101001011" source="15153" target="14675" cy:directed="1"/>
      <edge id="20325" label="0101001001 (1) 0101001101" source="15153" target="14750" cy:directed="1"/>
      <edge id="20324" label="0101001001 (1) 0101000001" source="15153" target="15326" cy:directed="1"/>
      <edge id="20323" label="0101001001 (1) 0101101001" source="15153" target="15035" cy:directed="1"/>
      <edge id="20322" label="0101001001 (1) 0001001001" source="15153" target="15161" cy:directed="1"/>
      <edge id="20321" label="0101001001 (1) 1101001001" source="15153" target="15150" cy:directed="1"/>
      <edge id="20320" label="0101001010 (1) 0101001011" source="15152" target="14675" cy:directed="1"/>
      <edge id="20319" label="0101001010 (1) 0101000010" source="15152" target="15325" cy:directed="1"/>
      <edge id="20318" label="0101001010 (1) 0101101010" source="15152" target="14674" cy:directed="1"/>
      <edge id="20317" label="0101001010 (1) 0001001010" source="15152" target="15160" cy:directed="1"/>
      <edge id="20316" label="0101001010 (1) 1101001010" source="15152" target="15149" cy:directed="1"/>
      <edge id="20315" label="0101101000 (1) 0101101001" source="15151" target="15035" cy:directed="1"/>
      <edge id="20314" label="0101101000 (1) 0101100000" source="15151" target="15324" cy:directed="1"/>
      <edge id="20313" label="0101101000 (1) 0101111000" source="15151" target="15104" cy:directed="1"/>
      <edge id="20312" label="0101101000 (1) 0001101000" source="15151" target="15101" cy:directed="1"/>
      <edge id="20311" label="0101101000 (1) 1101101000" source="15151" target="15148" cy:directed="1"/>
      <edge id="20310" label="1101001001 (1) 1101001000" source="15150" target="15206" cy:directed="1"/>
      <edge id="20309" label="1101001001 (1) 1101001011" source="15150" target="14677" cy:directed="1"/>
      <edge id="20308" label="1101001001 (1) 1101001101" source="15150" target="14753" cy:directed="1"/>
      <edge id="20307" label="1101001001 (1) 1101000001" source="15150" target="15329" cy:directed="1"/>
      <edge id="20306" label="1101001001 (1) 1101101001" source="15150" target="15036" cy:directed="1"/>
      <edge id="20305" label="1101001001 (1) 0101001001" source="15150" target="15153" cy:directed="1"/>
      <edge id="20304" label="1101001010 (1) 1101001011" source="15149" target="14677" cy:directed="1"/>
      <edge id="20303" label="1101001010 (1) 1101000010" source="15149" target="15328" cy:directed="1"/>
      <edge id="20302" label="1101001010 (1) 1101101010" source="15149" target="14676" cy:directed="1"/>
      <edge id="20301" label="1101001010 (1) 0101001010" source="15149" target="15152" cy:directed="1"/>
      <edge id="20300" label="1101101000 (1) 1101101001" source="15148" target="15036" cy:directed="1"/>
      <edge id="20299" label="1101101000 (1) 1101100000" source="15148" target="15327" cy:directed="1"/>
      <edge id="20298" label="1101101000 (1) 1101111000" source="15148" target="15106" cy:directed="1"/>
      <edge id="20297" label="1101101000 (1) 0101101000" source="15148" target="15151" cy:directed="1"/>
      <edge id="20296" label="0000000100 (1) 0000000101" source="15147" target="15146" cy:directed="1"/>
      <edge id="20295" label="0000000100 (1) 0000000110" source="15147" target="15145" cy:directed="1"/>
      <edge id="20294" label="0000000100 (1) 0000000000" source="15147" target="15361" cy:directed="1"/>
      <edge id="20293" label="0000000100 (1) 0000100100" source="15147" target="15144" cy:directed="1"/>
      <edge id="20292" label="0000000100 (1) 0001000100" source="15147" target="15143" cy:directed="1"/>
      <edge id="20291" label="0000000100 (1) 0010000100" source="15147" target="15142" cy:directed="1"/>
      <edge id="20290" label="0000000100 (1) 1000000100" source="15147" target="15141" cy:directed="1"/>
      <edge id="20289" label="0000000101 (1) 0000000100" source="15146" target="15147" cy:directed="1"/>
      <edge id="20288" label="0000000101 (1) 0000000111" source="15146" target="14661" cy:directed="1"/>
      <edge id="20287" label="0000000101 (1) 0000100101" source="15146" target="15011" cy:directed="1"/>
      <edge id="20286" label="0000000101 (1) 0001000101" source="15146" target="15063" cy:directed="1"/>
      <edge id="20285" label="0000000101 (1) 0010000101" source="15146" target="15090" cy:directed="1"/>
      <edge id="20284" label="0000000101 (1) 1000000101" source="15146" target="15140" cy:directed="1"/>
      <edge id="20283" label="0000000110 (1) 0000000111" source="15145" target="14661" cy:directed="1"/>
      <edge id="20282" label="0000000110 (1) 0000000010" source="15145" target="15359" cy:directed="1"/>
      <edge id="20281" label="0000000110 (1) 0000100110" source="15145" target="14660" cy:directed="1"/>
      <edge id="20280" label="0000000110 (1) 0001000110" source="15145" target="15062" cy:directed="1"/>
      <edge id="20279" label="0000000110 (1) 0010000110" source="15145" target="15089" cy:directed="1"/>
      <edge id="20278" label="0000000110 (1) 1000000110" source="15145" target="15139" cy:directed="1"/>
      <edge id="20277" label="0000100100 (1) 0000100101" source="15144" target="15011" cy:directed="1"/>
      <edge id="20276" label="0000100100 (1) 0000100000" source="15144" target="15303" cy:directed="1"/>
      <edge id="20275" label="0000100100 (1) 0000110100" source="15144" target="15010" cy:directed="1"/>
      <edge id="20274" label="0000100100 (1) 0001100100" source="15144" target="15061" cy:directed="1"/>
      <edge id="20273" label="0000100100 (1) 0010100100" source="15144" target="15088" cy:directed="1"/>
      <edge id="20272" label="0000100100 (1) 1000100100" source="15144" target="15138" cy:directed="1"/>
      <edge id="20271" label="0001000100 (1) 0001000101" source="15143" target="15063" cy:directed="1"/>
      <edge id="20270" label="0001000100 (1) 0001000110" source="15143" target="15062" cy:directed="1"/>
      <edge id="20269" label="0001000100 (1) 0001000000" source="15143" target="15358" cy:directed="1"/>
      <edge id="20268" label="0001000100 (1) 0001100100" source="15143" target="15061" cy:directed="1"/>
      <edge id="20267" label="0001000100 (1) 0011000100" source="15143" target="15060" cy:directed="1"/>
      <edge id="20266" label="0001000100 (1) 1001000100" source="15143" target="15137" cy:directed="1"/>
      <edge id="20265" label="0010000100 (1) 0010000101" source="15142" target="15090" cy:directed="1"/>
      <edge id="20264" label="0010000100 (1) 0010000110" source="15142" target="15089" cy:directed="1"/>
      <edge id="20263" label="0010000100 (1) 0010000000" source="15142" target="15341" cy:directed="1"/>
      <edge id="20262" label="0010000100 (1) 0010100100" source="15142" target="15088" cy:directed="1"/>
      <edge id="20261" label="0010000100 (1) 1010000100" source="15142" target="15136" cy:directed="1"/>
      <edge id="20260" label="1000000100 (1) 1000000101" source="15141" target="15140" cy:directed="1"/>
      <edge id="20259" label="1000000100 (1) 1000000110" source="15141" target="15139" cy:directed="1"/>
      <edge id="20258" label="1000000100 (1) 1000000000" source="15141" target="15357" cy:directed="1"/>
      <edge id="20257" label="1000000100 (1) 1000100100" source="15141" target="15138" cy:directed="1"/>
      <edge id="20256" label="1000000100 (1) 1001000100" source="15141" target="15137" cy:directed="1"/>
      <edge id="20255" label="1000000100 (1) 1010000100" source="15141" target="15136" cy:directed="1"/>
      <edge id="20254" label="1000000100 (1) 1100000100" source="15141" target="15135" cy:directed="1"/>
      <edge id="20253" label="1000000100 (1) 0000000100" source="15141" target="15147" cy:directed="1"/>
      <edge id="20252" label="1000000101 (1) 1000000100" source="15140" target="15141" cy:directed="1"/>
      <edge id="20251" label="1000000101 (1) 1000000111" source="15140" target="14663" cy:directed="1"/>
      <edge id="20250" label="1000000101 (1) 1000100101" source="15140" target="15015" cy:directed="1"/>
      <edge id="20249" label="1000000101 (1) 1001000101" source="15140" target="15059" cy:directed="1"/>
      <edge id="20248" label="1000000101 (1) 1010000101" source="15140" target="15094" cy:directed="1"/>
      <edge id="20247" label="1000000101 (1) 1100000101" source="15140" target="15123" cy:directed="1"/>
      <edge id="20246" label="1000000101 (1) 0000000101" source="15140" target="15146" cy:directed="1"/>
      <edge id="20245" label="1000000110 (1) 1000000111" source="15139" target="14663" cy:directed="1"/>
      <edge id="20244" label="1000000110 (1) 1000000010" source="15139" target="15355" cy:directed="1"/>
      <edge id="20243" label="1000000110 (1) 1000100110" source="15139" target="14662" cy:directed="1"/>
      <edge id="20242" label="1000000110 (1) 1001000110" source="15139" target="15058" cy:directed="1"/>
      <edge id="20241" label="1000000110 (1) 1010000110" source="15139" target="15093" cy:directed="1"/>
      <edge id="20240" label="1000000110 (1) 1100000110" source="15139" target="15122" cy:directed="1"/>
      <edge id="20239" label="1000000110 (1) 0000000110" source="15139" target="15145" cy:directed="1"/>
      <edge id="20238" label="1000100100 (1) 1000100101" source="15138" target="15015" cy:directed="1"/>
      <edge id="20237" label="1000100100 (1) 1000100000" source="15138" target="15309" cy:directed="1"/>
      <edge id="20236" label="1000100100 (1) 1000110100" source="15138" target="15014" cy:directed="1"/>
      <edge id="20235" label="1000100100 (1) 1001100100" source="15138" target="15057" cy:directed="1"/>
      <edge id="20234" label="1000100100 (1) 1010100100" source="15138" target="15092" cy:directed="1"/>
      <edge id="20233" label="1000100100 (1) 1100100100" source="15138" target="15121" cy:directed="1"/>
      <edge id="20232" label="1000100100 (1) 0000100100" source="15138" target="15144" cy:directed="1"/>
      <edge id="20231" label="1001000100 (1) 1001000101" source="15137" target="15059" cy:directed="1"/>
      <edge id="20230" label="1001000100 (1) 1001000110" source="15137" target="15058" cy:directed="1"/>
      <edge id="20229" label="1001000100 (1) 1001000000" source="15137" target="15354" cy:directed="1"/>
      <edge id="20228" label="1001000100 (1) 1001100100" source="15137" target="15057" cy:directed="1"/>
      <edge id="20227" label="1001000100 (1) 1011000100" source="15137" target="15056" cy:directed="1"/>
      <edge id="20226" label="1001000100 (1) 1101000100" source="15137" target="15120" cy:directed="1"/>
      <edge id="20225" label="1001000100 (1) 0001000100" source="15137" target="15143" cy:directed="1"/>
      <edge id="20224" label="1010000100 (1) 1010000101" source="15136" target="15094" cy:directed="1"/>
      <edge id="20223" label="1010000100 (1) 1010000110" source="15136" target="15093" cy:directed="1"/>
      <edge id="20222" label="1010000100 (1) 1010000000" source="15136" target="15345" cy:directed="1"/>
      <edge id="20221" label="1010000100 (1) 1010100100" source="15136" target="15092" cy:directed="1"/>
      <edge id="20220" label="1010000100 (1) 1110000100" source="15136" target="15091" cy:directed="1"/>
      <edge id="20219" label="1010000100 (1) 0010000100" source="15136" target="15142" cy:directed="1"/>
      <edge id="20218" label="1100000100 (1) 1100000101" source="15135" target="15123" cy:directed="1"/>
      <edge id="20217" label="1100000100 (1) 1100000110" source="15135" target="15122" cy:directed="1"/>
      <edge id="20216" label="1100000100 (1) 1100000000" source="15135" target="15353" cy:directed="1"/>
      <edge id="20215" label="1100000100 (1) 1100100100" source="15135" target="15121" cy:directed="1"/>
      <edge id="20214" label="1100000100 (1) 1101000100" source="15135" target="15120" cy:directed="1"/>
      <edge id="20213" label="1100000100 (1) 0100000100" source="15135" target="15119" cy:directed="1"/>
      <edge id="20212" label="0011001000 (1) 0011001001" source="15134" target="15133" cy:directed="1"/>
      <edge id="20211" label="0011001000 (1) 0011001010" source="15134" target="15132" cy:directed="1"/>
      <edge id="20210" label="0011001000 (1) 0011000000" source="15134" target="15323" cy:directed="1"/>
      <edge id="20209" label="0011001000 (1) 0010001000" source="15134" target="15181" cy:directed="1"/>
      <edge id="20208" label="0011001000 (1) 0001001000" source="15134" target="15209" cy:directed="1"/>
      <edge id="20207" label="0011001000 (1) 1011001000" source="15134" target="15131" cy:directed="1"/>
      <edge id="20206" label="0011001001 (1) 0011001000" source="15133" target="15134" cy:directed="1"/>
      <edge id="20205" label="0011001001 (1) 0011001011" source="15133" target="14659" cy:directed="1"/>
      <edge id="20204" label="0011001001 (1) 0011001101" source="15133" target="14740" cy:directed="1"/>
      <edge id="20203" label="0011001001 (1) 0011000001" source="15133" target="15322" cy:directed="1"/>
      <edge id="20202" label="0011001001 (1) 0010001001" source="15133" target="15180" cy:directed="1"/>
      <edge id="20201" label="0011001001 (1) 0001001001" source="15133" target="15161" cy:directed="1"/>
      <edge id="20200" label="0011001001 (1) 1011001001" source="15133" target="15130" cy:directed="1"/>
      <edge id="20199" label="0011001010 (1) 0011001011" source="15132" target="14659" cy:directed="1"/>
      <edge id="20198" label="0011001010 (1) 0011000010" source="15132" target="15321" cy:directed="1"/>
      <edge id="20197" label="0011001010 (1) 0010001010" source="15132" target="15179" cy:directed="1"/>
      <edge id="20196" label="0011001010 (1) 0001001010" source="15132" target="15160" cy:directed="1"/>
      <edge id="20195" label="0011001010 (1) 1011001010" source="15132" target="15129" cy:directed="1"/>
      <edge id="20194" label="1011001000 (1) 1011001001" source="15131" target="15130" cy:directed="1"/>
      <edge id="20193" label="1011001000 (1) 1011001010" source="15131" target="15129" cy:directed="1"/>
      <edge id="20192" label="1011001000 (1) 1011000000" source="15131" target="15320" cy:directed="1"/>
      <edge id="20191" label="1011001000 (1) 1010001000" source="15131" target="15185" cy:directed="1"/>
      <edge id="20190" label="1011001000 (1) 1001001000" source="15131" target="15214" cy:directed="1"/>
      <edge id="20189" label="1011001000 (1) 1111001000" source="15131" target="15128" cy:directed="1"/>
      <edge id="20188" label="1011001000 (1) 0011001000" source="15131" target="15134" cy:directed="1"/>
      <edge id="20187" label="1011001001 (1) 1011001000" source="15130" target="15131" cy:directed="1"/>
      <edge id="20186" label="1011001001 (1) 1011001011" source="15130" target="14658" cy:directed="1"/>
      <edge id="20185" label="1011001001 (1) 1011001101" source="15130" target="14743" cy:directed="1"/>
      <edge id="20184" label="1011001001 (1) 1011000001" source="15130" target="15319" cy:directed="1"/>
      <edge id="20183" label="1011001001 (1) 1010001001" source="15130" target="15184" cy:directed="1"/>
      <edge id="20182" label="1011001001 (1) 1001001001" source="15130" target="15159" cy:directed="1"/>
      <edge id="20181" label="1011001001 (1) 1111001001" source="15130" target="15114" cy:directed="1"/>
      <edge id="20180" label="1011001001 (1) 0011001001" source="15130" target="15133" cy:directed="1"/>
      <edge id="20179" label="1011001010 (1) 1011001011" source="15129" target="14658" cy:directed="1"/>
      <edge id="20178" label="1011001010 (1) 1011000010" source="15129" target="15318" cy:directed="1"/>
      <edge id="20177" label="1011001010 (1) 1010001010" source="15129" target="15183" cy:directed="1"/>
      <edge id="20176" label="1011001010 (1) 1001001010" source="15129" target="15158" cy:directed="1"/>
      <edge id="20175" label="1011001010 (1) 1111001010" source="15129" target="15113" cy:directed="1"/>
      <edge id="20174" label="1011001010 (1) 0011001010" source="15129" target="15132" cy:directed="1"/>
      <edge id="20173" label="1111001000 (1) 1111001001" source="15128" target="15114" cy:directed="1"/>
      <edge id="20172" label="1111001000 (1) 1111001010" source="15128" target="15113" cy:directed="1"/>
      <edge id="20171" label="1111001000 (1) 1111000000" source="15128" target="15317" cy:directed="1"/>
      <edge id="20170" label="1111001000 (1) 1111101000" source="15128" target="15112" cy:directed="1"/>
      <edge id="20169" label="1111001000 (1) 1110001000" source="15128" target="15182" cy:directed="1"/>
      <edge id="20168" label="1111001000 (1) 1101001000" source="15128" target="15206" cy:directed="1"/>
      <edge id="20167" label="1111001000 (1) 0111001000" source="15128" target="15111" cy:directed="1"/>
      <edge id="20166" label="0001110001 (1) 0001110000" source="15127" target="15282" cy:directed="1"/>
      <edge id="20165" label="0001110001 (1) 0001110101" source="15127" target="14738" cy:directed="1"/>
      <edge id="20164" label="0001110001 (1) 0001111001" source="15127" target="14834" cy:directed="1"/>
      <edge id="20163" label="0001110001 (1) 0001010001" source="15127" target="15229" cy:directed="1"/>
      <edge id="20162" label="0001110001 (1) 0011110001" source="15127" target="15084" cy:directed="1"/>
      <edge id="20161" label="0001110001 (1) 1001110001" source="15127" target="15125" cy:directed="1"/>
      <edge id="20160" label="0001111000 (1) 0001111001" source="15126" target="14834" cy:directed="1"/>
      <edge id="20159" label="0001111000 (1) 0001111100" source="15126" target="14833" cy:directed="1"/>
      <edge id="20158" label="0001111000 (1) 0001011000" source="15126" target="15227" cy:directed="1"/>
      <edge id="20157" label="0001111000 (1) 0011111000" source="15126" target="15083" cy:directed="1"/>
      <edge id="20156" label="0001111000 (1) 1001111000" source="15126" target="15124" cy:directed="1"/>
      <edge id="20155" label="1001110001 (1) 1001110000" source="15125" target="15279" cy:directed="1"/>
      <edge id="20154" label="1001110001 (1) 1001110101" source="15125" target="14737" cy:directed="1"/>
      <edge id="20153" label="1001110001 (1) 1001111001" source="15125" target="14832" cy:directed="1"/>
      <edge id="20152" label="1001110001 (1) 1001010001" source="15125" target="15226" cy:directed="1"/>
      <edge id="20151" label="1001110001 (1) 1011110001" source="15125" target="15082" cy:directed="1"/>
      <edge id="20150" label="1001110001 (1) 0001110001" source="15125" target="15127" cy:directed="1"/>
      <edge id="20149" label="1001111000 (1) 1001111001" source="15124" target="14832" cy:directed="1"/>
      <edge id="20148" label="1001111000 (1) 1001111100" source="15124" target="14831" cy:directed="1"/>
      <edge id="20147" label="1001111000 (1) 1001011000" source="15124" target="15224" cy:directed="1"/>
      <edge id="20146" label="1001111000 (1) 1011111000" source="15124" target="15081" cy:directed="1"/>
      <edge id="20145" label="1001111000 (1) 0001111000" source="15124" target="15126" cy:directed="1"/>
      <edge id="20144" label="1100000101 (1) 1100000100" source="15123" target="15135" cy:directed="1"/>
      <edge id="20143" label="1100000101 (1) 1100000111" source="15123" target="14645" cy:directed="1"/>
      <edge id="20142" label="1100000101 (1) 1100100101" source="15123" target="14996" cy:directed="1"/>
      <edge id="20141" label="1100000101 (1) 1101000101" source="15123" target="15055" cy:directed="1"/>
      <edge id="20140" label="1100000101 (1) 0100000101" source="15123" target="15118" cy:directed="1"/>
      <edge id="20139" label="1100000110 (1) 1100000111" source="15122" target="14645" cy:directed="1"/>
      <edge id="20138" label="1100000110 (1) 1100000010" source="15122" target="15347" cy:directed="1"/>
      <edge id="20137" label="1100000110 (1) 1100100110" source="15122" target="14644" cy:directed="1"/>
      <edge id="20136" label="1100000110 (1) 1101000110" source="15122" target="15054" cy:directed="1"/>
      <edge id="20135" label="1100000110 (1) 0100000110" source="15122" target="15117" cy:directed="1"/>
      <edge id="20134" label="1100100100 (1) 1100100101" source="15121" target="14996" cy:directed="1"/>
      <edge id="20133" label="1100100100 (1) 1100100000" source="15121" target="15304" cy:directed="1"/>
      <edge id="20132" label="1100100100 (1) 1100110100" source="15121" target="14995" cy:directed="1"/>
      <edge id="20131" label="1100100100 (1) 1101100100" source="15121" target="15053" cy:directed="1"/>
      <edge id="20130" label="1100100100 (1) 0100100100" source="15121" target="15116" cy:directed="1"/>
      <edge id="20129" label="1101000100 (1) 1101000101" source="15120" target="15055" cy:directed="1"/>
      <edge id="20128" label="1101000100 (1) 1101000110" source="15120" target="15054" cy:directed="1"/>
      <edge id="20127" label="1101000100 (1) 1101000000" source="15120" target="15346" cy:directed="1"/>
      <edge id="20126" label="1101000100 (1) 1101100100" source="15120" target="15053" cy:directed="1"/>
      <edge id="20125" label="1101000100 (1) 0101000100" source="15120" target="15115" cy:directed="1"/>
      <edge id="20124" label="0100000100 (1) 0100000101" source="15119" target="15118" cy:directed="1"/>
      <edge id="20123" label="0100000100 (1) 0100000110" source="15119" target="15117" cy:directed="1"/>
      <edge id="20122" label="0100000100 (1) 0100000000" source="15119" target="15352" cy:directed="1"/>
      <edge id="20121" label="0100000100 (1) 0100100100" source="15119" target="15116" cy:directed="1"/>
      <edge id="20120" label="0100000100 (1) 0101000100" source="15119" target="15115" cy:directed="1"/>
      <edge id="20119" label="0100000100 (1) 0000000100" source="15119" target="15147" cy:directed="1"/>
      <edge id="20118" label="0100000100 (1) 1100000100" source="15119" target="15135" cy:directed="1"/>
      <edge id="20117" label="0100000101 (1) 0100000100" source="15118" target="15119" cy:directed="1"/>
      <edge id="20116" label="0100000101 (1) 0100000111" source="15118" target="14648" cy:directed="1"/>
      <edge id="20115" label="0100000101 (1) 0100100101" source="15118" target="15001" cy:directed="1"/>
      <edge id="20114" label="0100000101 (1) 0101000101" source="15118" target="15052" cy:directed="1"/>
      <edge id="20113" label="0100000101 (1) 0000000101" source="15118" target="15146" cy:directed="1"/>
      <edge id="20112" label="0100000101 (1) 1100000101" source="15118" target="15123" cy:directed="1"/>
      <edge id="20111" label="0100000110 (1) 0100000111" source="15117" target="14648" cy:directed="1"/>
      <edge id="20110" label="0100000110 (1) 0100000010" source="15117" target="15350" cy:directed="1"/>
      <edge id="20109" label="0100000110 (1) 0100100110" source="15117" target="14647" cy:directed="1"/>
      <edge id="20108" label="0100000110 (1) 0101000110" source="15117" target="15051" cy:directed="1"/>
      <edge id="20107" label="0100000110 (1) 0000000110" source="15117" target="15145" cy:directed="1"/>
      <edge id="20106" label="0100000110 (1) 1100000110" source="15117" target="15122" cy:directed="1"/>
      <edge id="20105" label="0100100100 (1) 0100100101" source="15116" target="15001" cy:directed="1"/>
      <edge id="20104" label="0100100100 (1) 0100100000" source="15116" target="15298" cy:directed="1"/>
      <edge id="20103" label="0100100100 (1) 0100110100" source="15116" target="15000" cy:directed="1"/>
      <edge id="20102" label="0100100100 (1) 0101100100" source="15116" target="15050" cy:directed="1"/>
      <edge id="20101" label="0100100100 (1) 0000100100" source="15116" target="15144" cy:directed="1"/>
      <edge id="20100" label="0100100100 (1) 1100100100" source="15116" target="15121" cy:directed="1"/>
      <edge id="20099" label="0101000100 (1) 0101000101" source="15115" target="15052" cy:directed="1"/>
      <edge id="20098" label="0101000100 (1) 0101000110" source="15115" target="15051" cy:directed="1"/>
      <edge id="20097" label="0101000100 (1) 0101000000" source="15115" target="15349" cy:directed="1"/>
      <edge id="20096" label="0101000100 (1) 0101100100" source="15115" target="15050" cy:directed="1"/>
      <edge id="20095" label="0101000100 (1) 0001000100" source="15115" target="15143" cy:directed="1"/>
      <edge id="20094" label="0101000100 (1) 1101000100" source="15115" target="15120" cy:directed="1"/>
      <edge id="20093" label="1111001001 (1) 1111001000" source="15114" target="15128" cy:directed="1"/>
      <edge id="20092" label="1111001001 (1) 1111001011" source="15114" target="14657" cy:directed="1"/>
      <edge id="20091" label="1111001001 (1) 1111001101" source="15114" target="14734" cy:directed="1"/>
      <edge id="20090" label="1111001001 (1) 1111000001" source="15114" target="15316" cy:directed="1"/>
      <edge id="20089" label="1111001001 (1) 1111101001" source="15114" target="14991" cy:directed="1"/>
      <edge id="20088" label="1111001001 (1) 1110001001" source="15114" target="15174" cy:directed="1"/>
      <edge id="20087" label="1111001001 (1) 1101001001" source="15114" target="15150" cy:directed="1"/>
      <edge id="20086" label="1111001001 (1) 0111001001" source="15114" target="15110" cy:directed="1"/>
      <edge id="20085" label="1111001010 (1) 1111001011" source="15113" target="14657" cy:directed="1"/>
      <edge id="20084" label="1111001010 (1) 1111000010" source="15113" target="15315" cy:directed="1"/>
      <edge id="20083" label="1111001010 (1) 1111101010" source="15113" target="14656" cy:directed="1"/>
      <edge id="20082" label="1111001010 (1) 1110001010" source="15113" target="15173" cy:directed="1"/>
      <edge id="20081" label="1111001010 (1) 1101001010" source="15113" target="15149" cy:directed="1"/>
      <edge id="20080" label="1111001010 (1) 0111001010" source="15113" target="15109" cy:directed="1"/>
      <edge id="20079" label="1111101000 (1) 1111101001" source="15112" target="14991" cy:directed="1"/>
      <edge id="20078" label="1111101000 (1) 1111100000" source="15112" target="15314" cy:directed="1"/>
      <edge id="20077" label="1111101000 (1) 1111111000" source="15112" target="15072" cy:directed="1"/>
      <edge id="20076" label="1111101000 (1) 1110101000" source="15112" target="15067" cy:directed="1"/>
      <edge id="20075" label="1111101000 (1) 1101101000" source="15112" target="15148" cy:directed="1"/>
      <edge id="20074" label="1111101000 (1) 0111101000" source="15112" target="15108" cy:directed="1"/>
      <edge id="20073" label="0111001000 (1) 0111001001" source="15111" target="15110" cy:directed="1"/>
      <edge id="20072" label="0111001000 (1) 0111001010" source="15111" target="15109" cy:directed="1"/>
      <edge id="20071" label="0111001000 (1) 0111000000" source="15111" target="15313" cy:directed="1"/>
      <edge id="20070" label="0111001000 (1) 0111101000" source="15111" target="15108" cy:directed="1"/>
      <edge id="20069" label="0111001000 (1) 0110001000" source="15111" target="15172" cy:directed="1"/>
      <edge id="20068" label="0111001000 (1) 0101001000" source="15111" target="15202" cy:directed="1"/>
      <edge id="20067" label="0111001000 (1) 0011001000" source="15111" target="15134" cy:directed="1"/>
      <edge id="20066" label="0111001000 (1) 1111001000" source="15111" target="15128" cy:directed="1"/>
      <edge id="20065" label="0111001001 (1) 0111001000" source="15110" target="15111" cy:directed="1"/>
      <edge id="20064" label="0111001001 (1) 0111001011" source="15110" target="14653" cy:directed="1"/>
      <edge id="20063" label="0111001001 (1) 0111001101" source="15110" target="14730" cy:directed="1"/>
      <edge id="20062" label="0111001001 (1) 0111000001" source="15110" target="15312" cy:directed="1"/>
      <edge id="20061" label="0111001001 (1) 0111101001" source="15110" target="14990" cy:directed="1"/>
      <edge id="20060" label="0111001001 (1) 0110001001" source="15110" target="15171" cy:directed="1"/>
      <edge id="20059" label="0111001001 (1) 0101001001" source="15110" target="15153" cy:directed="1"/>
      <edge id="20058" label="0111001001 (1) 0011001001" source="15110" target="15133" cy:directed="1"/>
      <edge id="20057" label="0111001001 (1) 1111001001" source="15110" target="15114" cy:directed="1"/>
      <edge id="20056" label="0111001010 (1) 0111001011" source="15109" target="14653" cy:directed="1"/>
      <edge id="20055" label="0111001010 (1) 0111000010" source="15109" target="15311" cy:directed="1"/>
      <edge id="20054" label="0111001010 (1) 0111101010" source="15109" target="14652" cy:directed="1"/>
      <edge id="20053" label="0111001010 (1) 0110001010" source="15109" target="15170" cy:directed="1"/>
      <edge id="20052" label="0111001010 (1) 0101001010" source="15109" target="15152" cy:directed="1"/>
      <edge id="20051" label="0111001010 (1) 0011001010" source="15109" target="15132" cy:directed="1"/>
      <edge id="20050" label="0111001010 (1) 1111001010" source="15109" target="15113" cy:directed="1"/>
      <edge id="20049" label="0111101000 (1) 0111101001" source="15108" target="14990" cy:directed="1"/>
      <edge id="20048" label="0111101000 (1) 0111100000" source="15108" target="15310" cy:directed="1"/>
      <edge id="20047" label="0111101000 (1) 0111111000" source="15108" target="15070" cy:directed="1"/>
      <edge id="20046" label="0111101000 (1) 0110101000" source="15108" target="15065" cy:directed="1"/>
      <edge id="20045" label="0111101000 (1) 0101101000" source="15108" target="15151" cy:directed="1"/>
      <edge id="20044" label="0111101000 (1) 0011101000" source="15108" target="15048" cy:directed="1"/>
      <edge id="20043" label="0111101000 (1) 1111101000" source="15108" target="15112" cy:directed="1"/>
      <edge id="20042" label="1101110001 (1) 1101110000" source="15107" target="15266" cy:directed="1"/>
      <edge id="20041" label="1101110001 (1) 1101110101" source="15107" target="14726" cy:directed="1"/>
      <edge id="20040" label="1101110001 (1) 1101111001" source="15107" target="14823" cy:directed="1"/>
      <edge id="20039" label="1101110001 (1) 1001110001" source="15107" target="15125" cy:directed="1"/>
      <edge id="20038" label="1101110001 (1) 0101110001" source="15107" target="15105" cy:directed="1"/>
      <edge id="20037" label="1101111000 (1) 1101111001" source="15106" target="14823" cy:directed="1"/>
      <edge id="20036" label="1101111000 (1) 1101111100" source="15106" target="14822" cy:directed="1"/>
      <edge id="20035" label="1101111000 (1) 1001111000" source="15106" target="15124" cy:directed="1"/>
      <edge id="20034" label="1101111000 (1) 0101111000" source="15106" target="15104" cy:directed="1"/>
      <edge id="20033" label="0101110001 (1) 0101110000" source="15105" target="15264" cy:directed="1"/>
      <edge id="20032" label="0101110001 (1) 0101110101" source="15105" target="14727" cy:directed="1"/>
      <edge id="20031" label="0101110001 (1) 0101111001" source="15105" target="14821" cy:directed="1"/>
      <edge id="20030" label="0101110001 (1) 0001110001" source="15105" target="15127" cy:directed="1"/>
      <edge id="20029" label="0101110001 (1) 1101110001" source="15105" target="15107" cy:directed="1"/>
      <edge id="20028" label="0101111000 (1) 0101111001" source="15104" target="14821" cy:directed="1"/>
      <edge id="20027" label="0101111000 (1) 0101111100" source="15104" target="14820" cy:directed="1"/>
      <edge id="20026" label="0101111000 (1) 0001111000" source="15104" target="15126" cy:directed="1"/>
      <edge id="20025" label="0101111000 (1) 1101111000" source="15104" target="15106" cy:directed="1"/>
      <edge id="20024" label="0000101000 (1) 0000101001" source="15103" target="15102" cy:directed="1"/>
      <edge id="20023" label="0000101000 (1) 0000100000" source="15103" target="15303" cy:directed="1"/>
      <edge id="20022" label="0000101000 (1) 0000111000" source="15103" target="15175" cy:directed="1"/>
      <edge id="20021" label="0000101000 (1) 0000001000" source="15103" target="15212" cy:directed="1"/>
      <edge id="20020" label="0000101000 (1) 0001101000" source="15103" target="15101" cy:directed="1"/>
      <edge id="20019" label="0000101000 (1) 0010101000" source="15103" target="15100" cy:directed="1"/>
      <edge id="20018" label="0000101000 (1) 1000101000" source="15103" target="15099" cy:directed="1"/>
      <edge id="20017" label="0000101001 (1) 0000101000" source="15102" target="15103" cy:directed="1"/>
      <edge id="20016" label="0000101001 (1) 0000101101" source="15102" target="14715" cy:directed="1"/>
      <edge id="20015" label="0000101001 (1) 0000100001" source="15102" target="15302" cy:directed="1"/>
      <edge id="20014" label="0000101001 (1) 0000111001" source="15102" target="14917" cy:directed="1"/>
      <edge id="20013" label="0000101001 (1) 0000001001" source="15102" target="15211" cy:directed="1"/>
      <edge id="20012" label="0000101001 (1) 0001101001" source="15102" target="15049" cy:directed="1"/>
      <edge id="20011" label="0000101001 (1) 0010101001" source="15102" target="15069" cy:directed="1"/>
      <edge id="20010" label="0000101001 (1) 1000101001" source="15102" target="15098" cy:directed="1"/>
      <edge id="20009" label="0001101000 (1) 0001101001" source="15101" target="15049" cy:directed="1"/>
      <edge id="20008" label="0001101000 (1) 0001100000" source="15101" target="15300" cy:directed="1"/>
      <edge id="20007" label="0001101000 (1) 0001111000" source="15101" target="15126" cy:directed="1"/>
      <edge id="20006" label="0001101000 (1) 0001001000" source="15101" target="15209" cy:directed="1"/>
      <edge id="20005" label="0001101000 (1) 0011101000" source="15101" target="15048" cy:directed="1"/>
      <edge id="20004" label="0001101000 (1) 1001101000" source="15101" target="15097" cy:directed="1"/>
      <edge id="20003" label="0010101000 (1) 0010101001" source="15100" target="15069" cy:directed="1"/>
      <edge id="20002" label="0010101000 (1) 0010100000" source="15100" target="15299" cy:directed="1"/>
      <edge id="20001" label="0010101000 (1) 0010111000" source="15100" target="15164" cy:directed="1"/>
      <edge id="20000" label="0010101000 (1) 0010001000" source="15100" target="15181" cy:directed="1"/>
      <edge id="19999" label="0010101000 (1) 1010101000" source="15100" target="15096" cy:directed="1"/>
      <edge id="19998" label="1000101000 (1) 1000101001" source="15099" target="15098" cy:directed="1"/>
      <edge id="19997" label="1000101000 (1) 1000100000" source="15099" target="15309" cy:directed="1"/>
      <edge id="19996" label="1000101000 (1) 1000111000" source="15099" target="15177" cy:directed="1"/>
      <edge id="19995" label="1000101000 (1) 1000001000" source="15099" target="15217" cy:directed="1"/>
      <edge id="19994" label="1000101000 (1) 1001101000" source="15099" target="15097" cy:directed="1"/>
      <edge id="19993" label="1000101000 (1) 1010101000" source="15099" target="15096" cy:directed="1"/>
      <edge id="19992" label="1000101000 (1) 1100101000" source="15099" target="15095" cy:directed="1"/>
      <edge id="19991" label="1000101000 (1) 0000101000" source="15099" target="15103" cy:directed="1"/>
      <edge id="19990" label="1000101001 (1) 1000101000" source="15098" target="15099" cy:directed="1"/>
      <edge id="19989" label="1000101001 (1) 1000101101" source="15098" target="14720" cy:directed="1"/>
      <edge id="19988" label="1000101001 (1) 1000100001" source="15098" target="15308" cy:directed="1"/>
      <edge id="19987" label="1000101001 (1) 1000111001" source="15098" target="14920" cy:directed="1"/>
      <edge id="19986" label="1000101001 (1) 1000001001" source="15098" target="15216" cy:directed="1"/>
      <edge id="19985" label="1000101001 (1) 1001101001" source="15098" target="15047" cy:directed="1"/>
      <edge id="19984" label="1000101001 (1) 1010101001" source="15098" target="15068" cy:directed="1"/>
      <edge id="19983" label="1000101001 (1) 1100101001" source="15098" target="15085" cy:directed="1"/>
      <edge id="19982" label="1000101001 (1) 0000101001" source="15098" target="15102" cy:directed="1"/>
      <edge id="19981" label="1001101000 (1) 1001101001" source="15097" target="15047" cy:directed="1"/>
      <edge id="19980" label="1001101000 (1) 1001100000" source="15097" target="15306" cy:directed="1"/>
      <edge id="19979" label="1001101000 (1) 1001111000" source="15097" target="15124" cy:directed="1"/>
      <edge id="19978" label="1001101000 (1) 1001001000" source="15097" target="15214" cy:directed="1"/>
      <edge id="19977" label="1001101000 (1) 1011101000" source="15097" target="15046" cy:directed="1"/>
      <edge id="19976" label="1001101000 (1) 1101101000" source="15097" target="15148" cy:directed="1"/>
      <edge id="19975" label="1001101000 (1) 0001101000" source="15097" target="15101" cy:directed="1"/>
      <edge id="19974" label="1010101000 (1) 1010101001" source="15096" target="15068" cy:directed="1"/>
      <edge id="19973" label="1010101000 (1) 1010100000" source="15096" target="15305" cy:directed="1"/>
      <edge id="19972" label="1010101000 (1) 1010111000" source="15096" target="15162" cy:directed="1"/>
      <edge id="19971" label="1010101000 (1) 1010001000" source="15096" target="15185" cy:directed="1"/>
      <edge id="19970" label="1010101000 (1) 1110101000" source="15096" target="15067" cy:directed="1"/>
      <edge id="19969" label="1010101000 (1) 0010101000" source="15096" target="15100" cy:directed="1"/>
      <edge id="19968" label="1100101000 (1) 1100101001" source="15095" target="15085" cy:directed="1"/>
      <edge id="19967" label="1100101000 (1) 1100100000" source="15095" target="15304" cy:directed="1"/>
      <edge id="19966" label="1100101000 (1) 1100111000" source="15095" target="15166" cy:directed="1"/>
      <edge id="19965" label="1100101000 (1) 1100001000" source="15095" target="15213" cy:directed="1"/>
      <edge id="19964" label="1100101000 (1) 1101101000" source="15095" target="15148" cy:directed="1"/>
      <edge id="19963" label="1100101000 (1) 0100101000" source="15095" target="15087" cy:directed="1"/>
      <edge id="19962" label="1010000101 (1) 1010000100" source="15094" target="15136" cy:directed="1"/>
      <edge id="19961" label="1010000101 (1) 1010000111" source="15094" target="14620" cy:directed="1"/>
      <edge id="19960" label="1010000101 (1) 1010100101" source="15094" target="14984" cy:directed="1"/>
      <edge id="19959" label="1010000101 (1) 1110000101" source="15094" target="15080" cy:directed="1"/>
      <edge id="19958" label="1010000101 (1) 0010000101" source="15094" target="15090" cy:directed="1"/>
      <edge id="19957" label="1010000110 (1) 1010000111" source="15093" target="14620" cy:directed="1"/>
      <edge id="19956" label="1010000110 (1) 1010000010" source="15093" target="15343" cy:directed="1"/>
      <edge id="19955" label="1010000110 (1) 1010100110" source="15093" target="14619" cy:directed="1"/>
      <edge id="19954" label="1010000110 (1) 1110000110" source="15093" target="15079" cy:directed="1"/>
      <edge id="19953" label="1010000110 (1) 0010000110" source="15093" target="15089" cy:directed="1"/>
      <edge id="19952" label="1010100100 (1) 1010100101" source="15092" target="14984" cy:directed="1"/>
      <edge id="19951" label="1010100100 (1) 1010100000" source="15092" target="15305" cy:directed="1"/>
      <edge id="19950" label="1010100100 (1) 1010110100" source="15092" target="14983" cy:directed="1"/>
      <edge id="19949" label="1010100100 (1) 1110100100" source="15092" target="15078" cy:directed="1"/>
      <edge id="19948" label="1010100100 (1) 0010100100" source="15092" target="15088" cy:directed="1"/>
      <edge id="19947" label="1110000100 (1) 1110000101" source="15091" target="15080" cy:directed="1"/>
      <edge id="19946" label="1110000100 (1) 1110000110" source="15091" target="15079" cy:directed="1"/>
      <edge id="19945" label="1110000100 (1) 1110000000" source="15091" target="15342" cy:directed="1"/>
      <edge id="19944" label="1110000100 (1) 1110100100" source="15091" target="15078" cy:directed="1"/>
      <edge id="19943" label="1110000100 (1) 1100000100" source="15091" target="15135" cy:directed="1"/>
      <edge id="19942" label="1110000100 (1) 0110000100" source="15091" target="15077" cy:directed="1"/>
      <edge id="19941" label="0010000101 (1) 0010000100" source="15090" target="15142" cy:directed="1"/>
      <edge id="19940" label="0010000101 (1) 0010000111" source="15090" target="14622" cy:directed="1"/>
      <edge id="19939" label="0010000101 (1) 0010100101" source="15090" target="14987" cy:directed="1"/>
      <edge id="19938" label="0010000101 (1) 1010000101" source="15090" target="15094" cy:directed="1"/>
      <edge id="19937" label="0010000110 (1) 0010000111" source="15089" target="14622" cy:directed="1"/>
      <edge id="19936" label="0010000110 (1) 0010000010" source="15089" target="15339" cy:directed="1"/>
      <edge id="19935" label="0010000110 (1) 0010100110" source="15089" target="14621" cy:directed="1"/>
      <edge id="19934" label="0010000110 (1) 1010000110" source="15089" target="15093" cy:directed="1"/>
      <edge id="19933" label="0010100100 (1) 0010100101" source="15088" target="14987" cy:directed="1"/>
      <edge id="19932" label="0010100100 (1) 0010100000" source="15088" target="15299" cy:directed="1"/>
      <edge id="19931" label="0010100100 (1) 0010110100" source="15088" target="14986" cy:directed="1"/>
      <edge id="19930" label="0010100100 (1) 1010100100" source="15088" target="15092" cy:directed="1"/>
      <edge id="19929" label="0100101000 (1) 0100101001" source="15087" target="15086" cy:directed="1"/>
      <edge id="19928" label="0100101000 (1) 0100100000" source="15087" target="15298" cy:directed="1"/>
      <edge id="19927" label="0100101000 (1) 0100111000" source="15087" target="15168" cy:directed="1"/>
      <edge id="19926" label="0100101000 (1) 0100001000" source="15087" target="15205" cy:directed="1"/>
      <edge id="19925" label="0100101000 (1) 0101101000" source="15087" target="15151" cy:directed="1"/>
      <edge id="19924" label="0100101000 (1) 0000101000" source="15087" target="15103" cy:directed="1"/>
      <edge id="19923" label="0100101000 (1) 1100101000" source="15087" target="15095" cy:directed="1"/>
      <edge id="19922" label="0100101001 (1) 0100101000" source="15086" target="15087" cy:directed="1"/>
      <edge id="19921" label="0100101001 (1) 0100101101" source="15086" target="14709" cy:directed="1"/>
      <edge id="19920" label="0100101001 (1) 0100100001" source="15086" target="15297" cy:directed="1"/>
      <edge id="19919" label="0100101001 (1) 0100111001" source="15086" target="14913" cy:directed="1"/>
      <edge id="19918" label="0100101001 (1) 0100001001" source="15086" target="15204" cy:directed="1"/>
      <edge id="19917" label="0100101001 (1) 0101101001" source="15086" target="15035" cy:directed="1"/>
      <edge id="19916" label="0100101001 (1) 0000101001" source="15086" target="15102" cy:directed="1"/>
      <edge id="19915" label="0100101001 (1) 1100101001" source="15086" target="15085" cy:directed="1"/>
      <edge id="19914" label="1100101001 (1) 1100101000" source="15085" target="15095" cy:directed="1"/>
      <edge id="19913" label="1100101001 (1) 1100101101" source="15085" target="14708" cy:directed="1"/>
      <edge id="19912" label="1100101001 (1) 1100100001" source="15085" target="15295" cy:directed="1"/>
      <edge id="19911" label="1100101001 (1) 1100111001" source="15085" target="14907" cy:directed="1"/>
      <edge id="19910" label="1100101001 (1) 1100001001" source="15085" target="15208" cy:directed="1"/>
      <edge id="19909" label="1100101001 (1) 1101101001" source="15085" target="15036" cy:directed="1"/>
      <edge id="19908" label="1100101001 (1) 0100101001" source="15085" target="15086" cy:directed="1"/>
      <edge id="19907" label="0011110001 (1) 0011110000" source="15084" target="15252" cy:directed="1"/>
      <edge id="19906" label="0011110001 (1) 0011110101" source="15084" target="14707" cy:directed="1"/>
      <edge id="19905" label="0011110001 (1) 0011111001" source="15084" target="14795" cy:directed="1"/>
      <edge id="19904" label="0011110001 (1) 0011010001" source="15084" target="15200" cy:directed="1"/>
      <edge id="19903" label="0011110001 (1) 0010110001" source="15084" target="15165" cy:directed="1"/>
      <edge id="19902" label="0011110001 (1) 1011110001" source="15084" target="15082" cy:directed="1"/>
      <edge id="19901" label="0011111000 (1) 0011111001" source="15083" target="14795" cy:directed="1"/>
      <edge id="19900" label="0011111000 (1) 0011111100" source="15083" target="14794" cy:directed="1"/>
      <edge id="19899" label="0011111000 (1) 0011011000" source="15083" target="15198" cy:directed="1"/>
      <edge id="19898" label="0011111000 (1) 0010111000" source="15083" target="15164" cy:directed="1"/>
      <edge id="19897" label="0011111000 (1) 1011111000" source="15083" target="15081" cy:directed="1"/>
      <edge id="19896" label="1011110001 (1) 1011110000" source="15082" target="15250" cy:directed="1"/>
      <edge id="19895" label="1011110001 (1) 1011110101" source="15082" target="14706" cy:directed="1"/>
      <edge id="19894" label="1011110001 (1) 1011111001" source="15082" target="14793" cy:directed="1"/>
      <edge id="19893" label="1011110001 (1) 1011010001" source="15082" target="15196" cy:directed="1"/>
      <edge id="19892" label="1011110001 (1) 1010110001" source="15082" target="15163" cy:directed="1"/>
      <edge id="19891" label="1011110001 (1) 0011110001" source="15082" target="15084" cy:directed="1"/>
      <edge id="19890" label="1011111000 (1) 1011111001" source="15081" target="14793" cy:directed="1"/>
      <edge id="19889" label="1011111000 (1) 1011111100" source="15081" target="14792" cy:directed="1"/>
      <edge id="19888" label="1011111000 (1) 1011011000" source="15081" target="15194" cy:directed="1"/>
      <edge id="19887" label="1011111000 (1) 1010111000" source="15081" target="15162" cy:directed="1"/>
      <edge id="19886" label="1011111000 (1) 0011111000" source="15081" target="15083" cy:directed="1"/>
      <edge id="19885" label="1110000101 (1) 1110000100" source="15080" target="15091" cy:directed="1"/>
      <edge id="19884" label="1110000101 (1) 1110000111" source="15080" target="14612" cy:directed="1"/>
      <edge id="19883" label="1110000101 (1) 1110100101" source="15080" target="14981" cy:directed="1"/>
      <edge id="19882" label="1110000101 (1) 1100000101" source="15080" target="15123" cy:directed="1"/>
      <edge id="19881" label="1110000101 (1) 0110000101" source="15080" target="15076" cy:directed="1"/>
      <edge id="19880" label="1110000110 (1) 1110000111" source="15079" target="14612" cy:directed="1"/>
      <edge id="19879" label="1110000110 (1) 1110000010" source="15079" target="15337" cy:directed="1"/>
      <edge id="19878" label="1110000110 (1) 1110100110" source="15079" target="14611" cy:directed="1"/>
      <edge id="19877" label="1110000110 (1) 1100000110" source="15079" target="15122" cy:directed="1"/>
      <edge id="19876" label="1110000110 (1) 0110000110" source="15079" target="15075" cy:directed="1"/>
      <edge id="19875" label="1110100100 (1) 1110100101" source="15078" target="14981" cy:directed="1"/>
      <edge id="19874" label="1110100100 (1) 1110100000" source="15078" target="15289" cy:directed="1"/>
      <edge id="19873" label="1110100100 (1) 1110110100" source="15078" target="14980" cy:directed="1"/>
      <edge id="19872" label="1110100100 (1) 1100100100" source="15078" target="15121" cy:directed="1"/>
      <edge id="19871" label="1110100100 (1) 0110100100" source="15078" target="15074" cy:directed="1"/>
      <edge id="19870" label="0110000100 (1) 0110000101" source="15077" target="15076" cy:directed="1"/>
      <edge id="19869" label="0110000100 (1) 0110000110" source="15077" target="15075" cy:directed="1"/>
      <edge id="19868" label="0110000100 (1) 0110000000" source="15077" target="15336" cy:directed="1"/>
      <edge id="19867" label="0110000100 (1) 0110100100" source="15077" target="15074" cy:directed="1"/>
      <edge id="19866" label="0110000100 (1) 0100000100" source="15077" target="15119" cy:directed="1"/>
      <edge id="19865" label="0110000100 (1) 0010000100" source="15077" target="15142" cy:directed="1"/>
      <edge id="19864" label="0110000100 (1) 1110000100" source="15077" target="15091" cy:directed="1"/>
      <edge id="19863" label="0110000101 (1) 0110000100" source="15076" target="15077" cy:directed="1"/>
      <edge id="19862" label="0110000101 (1) 0110000111" source="15076" target="14609" cy:directed="1"/>
      <edge id="19861" label="0110000101 (1) 0110100101" source="15076" target="14979" cy:directed="1"/>
      <edge id="19860" label="0110000101 (1) 0100000101" source="15076" target="15118" cy:directed="1"/>
      <edge id="19859" label="0110000101 (1) 0010000101" source="15076" target="15090" cy:directed="1"/>
      <edge id="19858" label="0110000101 (1) 1110000101" source="15076" target="15080" cy:directed="1"/>
      <edge id="19857" label="0110000110 (1) 0110000111" source="15075" target="14609" cy:directed="1"/>
      <edge id="19856" label="0110000110 (1) 0110000010" source="15075" target="15334" cy:directed="1"/>
      <edge id="19855" label="0110000110 (1) 0110100110" source="15075" target="14608" cy:directed="1"/>
      <edge id="19854" label="0110000110 (1) 0100000110" source="15075" target="15117" cy:directed="1"/>
      <edge id="19853" label="0110000110 (1) 0010000110" source="15075" target="15089" cy:directed="1"/>
      <edge id="19852" label="0110000110 (1) 1110000110" source="15075" target="15079" cy:directed="1"/>
      <edge id="19851" label="0110100100 (1) 0110100101" source="15074" target="14979" cy:directed="1"/>
      <edge id="19850" label="0110100100 (1) 0110100000" source="15074" target="15286" cy:directed="1"/>
      <edge id="19849" label="0110100100 (1) 0110110100" source="15074" target="14978" cy:directed="1"/>
      <edge id="19848" label="0110100100 (1) 0100100100" source="15074" target="15116" cy:directed="1"/>
      <edge id="19847" label="0110100100 (1) 0010100100" source="15074" target="15088" cy:directed="1"/>
      <edge id="19846" label="0110100100 (1) 1110100100" source="15074" target="15078" cy:directed="1"/>
      <edge id="19845" label="1111110001 (1) 1111110000" source="15073" target="15240" cy:directed="1"/>
      <edge id="19844" label="1111110001 (1) 1111110101" source="15073" target="14703" cy:directed="1"/>
      <edge id="19843" label="1111110001 (1) 1111111001" source="15073" target="14775" cy:directed="1"/>
      <edge id="19842" label="1111110001 (1) 1110110001" source="15073" target="15157" cy:directed="1"/>
      <edge id="19841" label="1111110001 (1) 1101110001" source="15073" target="15107" cy:directed="1"/>
      <edge id="19840" label="1111110001 (1) 1011110001" source="15073" target="15082" cy:directed="1"/>
      <edge id="19839" label="1111110001 (1) 0111110001" source="15073" target="15071" cy:directed="1"/>
      <edge id="19838" label="1111111000 (1) 1111111001" source="15072" target="14775" cy:directed="1"/>
      <edge id="19837" label="1111111000 (1) 1111111100" source="15072" target="14774" cy:directed="1"/>
      <edge id="19836" label="1111111000 (1) 1110111000" source="15072" target="15156" cy:directed="1"/>
      <edge id="19835" label="1111111000 (1) 1101111000" source="15072" target="15106" cy:directed="1"/>
      <edge id="19834" label="1111111000 (1) 1011111000" source="15072" target="15081" cy:directed="1"/>
      <edge id="19833" label="1111111000 (1) 0111111000" source="15072" target="15070" cy:directed="1"/>
      <edge id="19832" label="0111110001 (1) 0111110000" source="15071" target="15238" cy:directed="1"/>
      <edge id="19831" label="0111110001 (1) 0111110101" source="15071" target="14700" cy:directed="1"/>
      <edge id="19830" label="0111110001 (1) 0111111001" source="15071" target="14777" cy:directed="1"/>
      <edge id="19829" label="0111110001 (1) 0110110001" source="15071" target="15155" cy:directed="1"/>
      <edge id="19828" label="0111110001 (1) 0101110001" source="15071" target="15105" cy:directed="1"/>
      <edge id="19827" label="0111110001 (1) 0011110001" source="15071" target="15084" cy:directed="1"/>
      <edge id="19826" label="0111110001 (1) 1111110001" source="15071" target="15073" cy:directed="1"/>
      <edge id="19825" label="0111111000 (1) 0111111001" source="15070" target="14777" cy:directed="1"/>
      <edge id="19824" label="0111111000 (1) 0111111100" source="15070" target="14776" cy:directed="1"/>
      <edge id="19823" label="0111111000 (1) 0110111000" source="15070" target="15154" cy:directed="1"/>
      <edge id="19822" label="0111111000 (1) 0101111000" source="15070" target="15104" cy:directed="1"/>
      <edge id="19821" label="0111111000 (1) 0011111000" source="15070" target="15083" cy:directed="1"/>
      <edge id="19820" label="0111111000 (1) 1111111000" source="15070" target="15072" cy:directed="1"/>
      <edge id="19819" label="0010101001 (1) 0010101000" source="15069" target="15100" cy:directed="1"/>
      <edge id="19818" label="0010101001 (1) 0010101101" source="15069" target="14695" cy:directed="1"/>
      <edge id="19817" label="0010101001 (1) 0010100001" source="15069" target="15293" cy:directed="1"/>
      <edge id="19816" label="0010101001 (1) 0010111001" source="15069" target="14878" cy:directed="1"/>
      <edge id="19815" label="0010101001 (1) 0010001001" source="15069" target="15180" cy:directed="1"/>
      <edge id="19814" label="0010101001 (1) 1010101001" source="15069" target="15068" cy:directed="1"/>
      <edge id="19813" label="1010101001 (1) 1010101000" source="15068" target="15096" cy:directed="1"/>
      <edge id="19812" label="1010101001 (1) 1010101101" source="15068" target="14694" cy:directed="1"/>
      <edge id="19811" label="1010101001 (1) 1010100001" source="15068" target="15291" cy:directed="1"/>
      <edge id="19810" label="1010101001 (1) 1010111001" source="15068" target="14876" cy:directed="1"/>
      <edge id="19809" label="1010101001 (1) 1010001001" source="15068" target="15184" cy:directed="1"/>
      <edge id="19808" label="1010101001 (1) 1110101001" source="15068" target="15066" cy:directed="1"/>
      <edge id="19807" label="1010101001 (1) 0010101001" source="15068" target="15069" cy:directed="1"/>
      <edge id="19806" label="1110101000 (1) 1110101001" source="15067" target="15066" cy:directed="1"/>
      <edge id="19805" label="1110101000 (1) 1110100000" source="15067" target="15289" cy:directed="1"/>
      <edge id="19804" label="1110101000 (1) 1110111000" source="15067" target="15156" cy:directed="1"/>
      <edge id="19803" label="1110101000 (1) 1110001000" source="15067" target="15182" cy:directed="1"/>
      <edge id="19802" label="1110101000 (1) 1100101000" source="15067" target="15095" cy:directed="1"/>
      <edge id="19801" label="1110101000 (1) 0110101000" source="15067" target="15065" cy:directed="1"/>
      <edge id="19800" label="1110101001 (1) 1110101000" source="15066" target="15067" cy:directed="1"/>
      <edge id="19799" label="1110101001 (1) 1110101101" source="15066" target="14692" cy:directed="1"/>
      <edge id="19798" label="1110101001 (1) 1110100001" source="15066" target="15288" cy:directed="1"/>
      <edge id="19797" label="1110101001 (1) 1110111001" source="15066" target="14869" cy:directed="1"/>
      <edge id="19796" label="1110101001 (1) 1110001001" source="15066" target="15174" cy:directed="1"/>
      <edge id="19795" label="1110101001 (1) 1100101001" source="15066" target="15085" cy:directed="1"/>
      <edge id="19794" label="1110101001 (1) 0110101001" source="15066" target="15064" cy:directed="1"/>
      <edge id="19793" label="0110101000 (1) 0110101001" source="15065" target="15064" cy:directed="1"/>
      <edge id="19792" label="0110101000 (1) 0110100000" source="15065" target="15286" cy:directed="1"/>
      <edge id="19791" label="0110101000 (1) 0110111000" source="15065" target="15154" cy:directed="1"/>
      <edge id="19790" label="0110101000 (1) 0110001000" source="15065" target="15172" cy:directed="1"/>
      <edge id="19789" label="0110101000 (1) 0100101000" source="15065" target="15087" cy:directed="1"/>
      <edge id="19788" label="0110101000 (1) 0010101000" source="15065" target="15100" cy:directed="1"/>
      <edge id="19787" label="0110101000 (1) 1110101000" source="15065" target="15067" cy:directed="1"/>
      <edge id="19786" label="0110101001 (1) 0110101000" source="15064" target="15065" cy:directed="1"/>
      <edge id="19785" label="0110101001 (1) 0110101101" source="15064" target="14690" cy:directed="1"/>
      <edge id="19784" label="0110101001 (1) 0110100001" source="15064" target="15285" cy:directed="1"/>
      <edge id="19783" label="0110101001 (1) 0110111001" source="15064" target="14867" cy:directed="1"/>
      <edge id="19782" label="0110101001 (1) 0110001001" source="15064" target="15171" cy:directed="1"/>
      <edge id="19781" label="0110101001 (1) 0100101001" source="15064" target="15086" cy:directed="1"/>
      <edge id="19780" label="0110101001 (1) 0010101001" source="15064" target="15069" cy:directed="1"/>
      <edge id="19779" label="0110101001 (1) 1110101001" source="15064" target="15066" cy:directed="1"/>
      <edge id="19778" label="0001000101 (1) 0001000100" source="15063" target="15143" cy:directed="1"/>
      <edge id="19777" label="0001000101 (1) 0001000111" source="15063" target="14587" cy:directed="1"/>
      <edge id="19776" label="0001000101 (1) 0001100101" source="15063" target="14963" cy:directed="1"/>
      <edge id="19775" label="0001000101 (1) 0011000101" source="15063" target="15039" cy:directed="1"/>
      <edge id="19774" label="0001000101 (1) 1001000101" source="15063" target="15059" cy:directed="1"/>
      <edge id="19773" label="0001000110 (1) 0001000111" source="15062" target="14587" cy:directed="1"/>
      <edge id="19772" label="0001000110 (1) 0001000010" source="15062" target="15330" cy:directed="1"/>
      <edge id="19771" label="0001000110 (1) 0001100110" source="15062" target="14586" cy:directed="1"/>
      <edge id="19770" label="0001000110 (1) 0011000110" source="15062" target="15038" cy:directed="1"/>
      <edge id="19769" label="0001000110 (1) 1001000110" source="15062" target="15058" cy:directed="1"/>
      <edge id="19768" label="0001100100 (1) 0001100101" source="15061" target="14963" cy:directed="1"/>
      <edge id="19767" label="0001100100 (1) 0001100000" source="15061" target="15300" cy:directed="1"/>
      <edge id="19766" label="0001100100 (1) 0001110100" source="15061" target="14962" cy:directed="1"/>
      <edge id="19765" label="0001100100 (1) 0011100100" source="15061" target="15037" cy:directed="1"/>
      <edge id="19764" label="0001100100 (1) 1001100100" source="15061" target="15057" cy:directed="1"/>
      <edge id="19763" label="0011000100 (1) 0011000101" source="15060" target="15039" cy:directed="1"/>
      <edge id="19762" label="0011000100 (1) 0011000110" source="15060" target="15038" cy:directed="1"/>
      <edge id="19761" label="0011000100 (1) 0011000000" source="15060" target="15323" cy:directed="1"/>
      <edge id="19760" label="0011000100 (1) 0011100100" source="15060" target="15037" cy:directed="1"/>
      <edge id="19759" label="0011000100 (1) 0010000100" source="15060" target="15142" cy:directed="1"/>
      <edge id="19758" label="0011000100 (1) 1011000100" source="15060" target="15056" cy:directed="1"/>
      <edge id="19757" label="1001000101 (1) 1001000100" source="15059" target="15137" cy:directed="1"/>
      <edge id="19756" label="1001000101 (1) 1001000111" source="15059" target="14585" cy:directed="1"/>
      <edge id="19755" label="1001000101 (1) 1001100101" source="15059" target="14959" cy:directed="1"/>
      <edge id="19754" label="1001000101 (1) 1011000101" source="15059" target="15034" cy:directed="1"/>
      <edge id="19753" label="1001000101 (1) 1101000101" source="15059" target="15055" cy:directed="1"/>
      <edge id="19752" label="1001000101 (1) 0001000101" source="15059" target="15063" cy:directed="1"/>
      <edge id="19751" label="1001000110 (1) 1001000111" source="15058" target="14585" cy:directed="1"/>
      <edge id="19750" label="1001000110 (1) 1001000010" source="15058" target="15332" cy:directed="1"/>
      <edge id="19749" label="1001000110 (1) 1001100110" source="15058" target="14584" cy:directed="1"/>
      <edge id="19748" label="1001000110 (1) 1011000110" source="15058" target="15033" cy:directed="1"/>
      <edge id="19747" label="1001000110 (1) 1101000110" source="15058" target="15054" cy:directed="1"/>
      <edge id="19746" label="1001000110 (1) 0001000110" source="15058" target="15062" cy:directed="1"/>
      <edge id="19745" label="1001100100 (1) 1001100101" source="15057" target="14959" cy:directed="1"/>
      <edge id="19744" label="1001100100 (1) 1001100000" source="15057" target="15306" cy:directed="1"/>
      <edge id="19743" label="1001100100 (1) 1001110100" source="15057" target="14958" cy:directed="1"/>
      <edge id="19742" label="1001100100 (1) 1011100100" source="15057" target="15032" cy:directed="1"/>
      <edge id="19741" label="1001100100 (1) 1101100100" source="15057" target="15053" cy:directed="1"/>
      <edge id="19740" label="1001100100 (1) 0001100100" source="15057" target="15061" cy:directed="1"/>
      <edge id="19739" label="1011000100 (1) 1011000101" source="15056" target="15034" cy:directed="1"/>
      <edge id="19738" label="1011000100 (1) 1011000110" source="15056" target="15033" cy:directed="1"/>
      <edge id="19737" label="1011000100 (1) 1011000000" source="15056" target="15320" cy:directed="1"/>
      <edge id="19736" label="1011000100 (1) 1011100100" source="15056" target="15032" cy:directed="1"/>
      <edge id="19735" label="1011000100 (1) 1010000100" source="15056" target="15136" cy:directed="1"/>
      <edge id="19734" label="1011000100 (1) 1111000100" source="15056" target="15031" cy:directed="1"/>
      <edge id="19733" label="1011000100 (1) 0011000100" source="15056" target="15060" cy:directed="1"/>
      <edge id="19732" label="1101000101 (1) 1101000100" source="15055" target="15120" cy:directed="1"/>
      <edge id="19731" label="1101000101 (1) 1101000111" source="15055" target="14581" cy:directed="1"/>
      <edge id="19730" label="1101000101 (1) 1101100101" source="15055" target="14939" cy:directed="1"/>
      <edge id="19729" label="1101000101 (1) 0101000101" source="15055" target="15052" cy:directed="1"/>
      <edge id="19728" label="1101000110 (1) 1101000111" source="15054" target="14581" cy:directed="1"/>
      <edge id="19727" label="1101000110 (1) 1101000010" source="15054" target="15328" cy:directed="1"/>
      <edge id="19726" label="1101000110 (1) 1101100110" source="15054" target="14580" cy:directed="1"/>
      <edge id="19725" label="1101000110 (1) 0101000110" source="15054" target="15051" cy:directed="1"/>
      <edge id="19724" label="1101100100 (1) 1101100101" source="15053" target="14939" cy:directed="1"/>
      <edge id="19723" label="1101100100 (1) 1101100000" source="15053" target="15327" cy:directed="1"/>
      <edge id="19722" label="1101100100 (1) 1101110100" source="15053" target="14938" cy:directed="1"/>
      <edge id="19721" label="1101100100 (1) 0101100100" source="15053" target="15050" cy:directed="1"/>
      <edge id="19720" label="0101000101 (1) 0101000100" source="15052" target="15115" cy:directed="1"/>
      <edge id="19719" label="0101000101 (1) 0101000111" source="15052" target="14577" cy:directed="1"/>
      <edge id="19718" label="0101000101 (1) 0101100101" source="15052" target="14937" cy:directed="1"/>
      <edge id="19717" label="0101000101 (1) 0001000101" source="15052" target="15063" cy:directed="1"/>
      <edge id="19716" label="0101000101 (1) 1101000101" source="15052" target="15055" cy:directed="1"/>
      <edge id="19715" label="0101000110 (1) 0101000111" source="15051" target="14577" cy:directed="1"/>
      <edge id="19714" label="0101000110 (1) 0101000010" source="15051" target="15325" cy:directed="1"/>
      <edge id="19713" label="0101000110 (1) 0101100110" source="15051" target="14576" cy:directed="1"/>
      <edge id="19712" label="0101000110 (1) 0001000110" source="15051" target="15062" cy:directed="1"/>
      <edge id="19711" label="0101000110 (1) 1101000110" source="15051" target="15054" cy:directed="1"/>
      <edge id="19710" label="0101100100 (1) 0101100101" source="15050" target="14937" cy:directed="1"/>
      <edge id="19709" label="0101100100 (1) 0101100000" source="15050" target="15324" cy:directed="1"/>
      <edge id="19708" label="0101100100 (1) 0101110100" source="15050" target="14936" cy:directed="1"/>
      <edge id="19707" label="0101100100 (1) 0001100100" source="15050" target="15061" cy:directed="1"/>
      <edge id="19706" label="0101100100 (1) 1101100100" source="15050" target="15053" cy:directed="1"/>
      <edge id="19705" label="0001101001 (1) 0001101000" source="15049" target="15101" cy:directed="1"/>
      <edge id="19704" label="0001101001 (1) 0001101101" source="15049" target="14683" cy:directed="1"/>
      <edge id="19703" label="0001101001 (1) 0001100001" source="15049" target="15283" cy:directed="1"/>
      <edge id="19702" label="0001101001 (1) 0001111001" source="15049" target="14834" cy:directed="1"/>
      <edge id="19701" label="0001101001 (1) 0001001001" source="15049" target="15161" cy:directed="1"/>
      <edge id="19700" label="0001101001 (1) 0011101001" source="15049" target="15009" cy:directed="1"/>
      <edge id="19699" label="0001101001 (1) 1001101001" source="15049" target="15047" cy:directed="1"/>
      <edge id="19698" label="0011101000 (1) 0011101001" source="15048" target="15009" cy:directed="1"/>
      <edge id="19697" label="0011101000 (1) 0011100000" source="15048" target="15281" cy:directed="1"/>
      <edge id="19696" label="0011101000 (1) 0011111000" source="15048" target="15083" cy:directed="1"/>
      <edge id="19695" label="0011101000 (1) 0011001000" source="15048" target="15134" cy:directed="1"/>
      <edge id="19694" label="0011101000 (1) 0010101000" source="15048" target="15100" cy:directed="1"/>
      <edge id="19693" label="0011101000 (1) 1011101000" source="15048" target="15046" cy:directed="1"/>
      <edge id="19692" label="1001101001 (1) 1001101000" source="15047" target="15097" cy:directed="1"/>
      <edge id="19691" label="1001101001 (1) 1001101101" source="15047" target="14673" cy:directed="1"/>
      <edge id="19690" label="1001101001 (1) 1001100001" source="15047" target="15280" cy:directed="1"/>
      <edge id="19689" label="1001101001 (1) 1001111001" source="15047" target="14832" cy:directed="1"/>
      <edge id="19688" label="1001101001 (1) 1001001001" source="15047" target="15159" cy:directed="1"/>
      <edge id="19687" label="1001101001 (1) 1011101001" source="15047" target="15008" cy:directed="1"/>
      <edge id="19686" label="1001101001 (1) 1101101001" source="15047" target="15036" cy:directed="1"/>
      <edge id="19685" label="1001101001 (1) 0001101001" source="15047" target="15049" cy:directed="1"/>
      <edge id="19684" label="1011101000 (1) 1011101001" source="15046" target="15008" cy:directed="1"/>
      <edge id="19683" label="1011101000 (1) 1011100000" source="15046" target="15278" cy:directed="1"/>
      <edge id="19682" label="1011101000 (1) 1011111000" source="15046" target="15081" cy:directed="1"/>
      <edge id="19681" label="1011101000 (1) 1011001000" source="15046" target="15131" cy:directed="1"/>
      <edge id="19680" label="1011101000 (1) 1010101000" source="15046" target="15096" cy:directed="1"/>
      <edge id="19679" label="1011101000 (1) 1111101000" source="15046" target="15112" cy:directed="1"/>
      <edge id="19678" label="1011101000 (1) 0011101000" source="15046" target="15048" cy:directed="1"/>
      <edge id="19677" label="0000011001 (1) 0000011000" source="15045" target="15269" cy:directed="1"/>
      <edge id="19676" label="0000011001 (1) 0000011011" source="15045" target="14571" cy:directed="1"/>
      <edge id="19675" label="0000011001 (1) 0000011101" source="15045" target="14679" cy:directed="1"/>
      <edge id="19674" label="0000011001 (1) 0000001001" source="15045" target="15211" cy:directed="1"/>
      <edge id="19673" label="0000011001 (1) 0001011001" source="15045" target="14977" cy:directed="1"/>
      <edge id="19672" label="0000011001 (1) 1000011001" source="15045" target="15042" cy:directed="1"/>
      <edge id="19671" label="0000011010 (1) 0000011011" source="15044" target="14571" cy:directed="1"/>
      <edge id="19670" label="0000011010 (1) 0000011110" source="15044" target="14678" cy:directed="1"/>
      <edge id="19669" label="0000011010 (1) 0000010010" source="15044" target="15270" cy:directed="1"/>
      <edge id="19668" label="0000011010 (1) 0000001010" source="15044" target="15210" cy:directed="1"/>
      <edge id="19667" label="0000011010 (1) 0001011010" source="15044" target="14976" cy:directed="1"/>
      <edge id="19666" label="0000011010 (1) 1000011010" source="15044" target="15041" cy:directed="1"/>
      <edge id="19665" label="0000011100 (1) 0000011101" source="15043" target="14679" cy:directed="1"/>
      <edge id="19664" label="0000011100 (1) 0000011110" source="15043" target="14678" cy:directed="1"/>
      <edge id="19663" label="0000011100 (1) 0000001100" source="15043" target="14850" cy:directed="1"/>
      <edge id="19662" label="0000011100 (1) 0001011100" source="15043" target="14975" cy:directed="1"/>
      <edge id="19661" label="0000011100 (1) 0010011100" source="15043" target="15005" cy:directed="1"/>
      <edge id="19660" label="0000011100 (1) 1000011100" source="15043" target="15040" cy:directed="1"/>
      <edge id="19659" label="1000011001 (1) 1000011000" source="15042" target="15274" cy:directed="1"/>
      <edge id="19658" label="1000011001 (1) 1000011011" source="15042" target="14570" cy:directed="1"/>
      <edge id="19657" label="1000011001 (1) 1000011101" source="15042" target="14681" cy:directed="1"/>
      <edge id="19656" label="1000011001 (1) 1000001001" source="15042" target="15216" cy:directed="1"/>
      <edge id="19655" label="1000011001 (1) 1001011001" source="15042" target="14974" cy:directed="1"/>
      <edge id="19654" label="1000011001 (1) 0000011001" source="15042" target="15045" cy:directed="1"/>
      <edge id="19653" label="1000011010 (1) 1000011011" source="15041" target="14570" cy:directed="1"/>
      <edge id="19652" label="1000011010 (1) 1000011110" source="15041" target="14680" cy:directed="1"/>
      <edge id="19651" label="1000011010 (1) 1000010010" source="15041" target="15275" cy:directed="1"/>
      <edge id="19650" label="1000011010 (1) 1000001010" source="15041" target="15215" cy:directed="1"/>
      <edge id="19649" label="1000011010 (1) 1001011010" source="15041" target="14973" cy:directed="1"/>
      <edge id="19648" label="1000011010 (1) 0000011010" source="15041" target="15044" cy:directed="1"/>
      <edge id="19647" label="1000011100 (1) 1000011101" source="15040" target="14681" cy:directed="1"/>
      <edge id="19646" label="1000011100 (1) 1000011110" source="15040" target="14680" cy:directed="1"/>
      <edge id="19645" label="1000011100 (1) 1000001100" source="15040" target="14845" cy:directed="1"/>
      <edge id="19644" label="1000011100 (1) 1001011100" source="15040" target="14972" cy:directed="1"/>
      <edge id="19643" label="1000011100 (1) 1010011100" source="15040" target="15002" cy:directed="1"/>
      <edge id="19642" label="1000011100 (1) 0000011100" source="15040" target="15043" cy:directed="1"/>
      <edge id="19641" label="0011000101 (1) 0011000100" source="15039" target="15060" cy:directed="1"/>
      <edge id="19640" label="0011000101 (1) 0011000111" source="15039" target="14559" cy:directed="1"/>
      <edge id="19639" label="0011000101 (1) 0011100101" source="15039" target="14911" cy:directed="1"/>
      <edge id="19638" label="0011000101 (1) 0010000101" source="15039" target="15090" cy:directed="1"/>
      <edge id="19637" label="0011000101 (1) 1011000101" source="15039" target="15034" cy:directed="1"/>
      <edge id="19636" label="0011000110 (1) 0011000111" source="15038" target="14559" cy:directed="1"/>
      <edge id="19635" label="0011000110 (1) 0011000010" source="15038" target="15321" cy:directed="1"/>
      <edge id="19634" label="0011000110 (1) 0011100110" source="15038" target="14558" cy:directed="1"/>
      <edge id="19633" label="0011000110 (1) 0010000110" source="15038" target="15089" cy:directed="1"/>
      <edge id="19632" label="0011000110 (1) 1011000110" source="15038" target="15033" cy:directed="1"/>
      <edge id="19631" label="0011100100 (1) 0011100101" source="15037" target="14911" cy:directed="1"/>
      <edge id="19630" label="0011100100 (1) 0011100000" source="15037" target="15281" cy:directed="1"/>
      <edge id="19629" label="0011100100 (1) 0011110100" source="15037" target="14910" cy:directed="1"/>
      <edge id="19628" label="0011100100 (1) 0010100100" source="15037" target="15088" cy:directed="1"/>
      <edge id="19627" label="0011100100 (1) 1011100100" source="15037" target="15032" cy:directed="1"/>
      <edge id="19626" label="1101101001 (1) 1101101000" source="15036" target="15148" cy:directed="1"/>
      <edge id="19625" label="1101101001 (1) 1101101101" source="15036" target="14664" cy:directed="1"/>
      <edge id="19624" label="1101101001 (1) 1101100001" source="15036" target="15267" cy:directed="1"/>
      <edge id="19623" label="1101101001 (1) 1101111001" source="15036" target="14823" cy:directed="1"/>
      <edge id="19622" label="1101101001 (1) 0101101001" source="15036" target="15035" cy:directed="1"/>
      <edge id="19621" label="0101101001 (1) 0101101000" source="15035" target="15151" cy:directed="1"/>
      <edge id="19620" label="0101101001 (1) 0101101101" source="15035" target="14665" cy:directed="1"/>
      <edge id="19619" label="0101101001 (1) 0101100001" source="15035" target="15265" cy:directed="1"/>
      <edge id="19618" label="0101101001 (1) 0101111001" source="15035" target="14821" cy:directed="1"/>
      <edge id="19617" label="0101101001 (1) 0001101001" source="15035" target="15049" cy:directed="1"/>
      <edge id="19616" label="0101101001 (1) 1101101001" source="15035" target="15036" cy:directed="1"/>
      <edge id="19615" label="1011000101 (1) 1011000100" source="15034" target="15056" cy:directed="1"/>
      <edge id="19614" label="1011000101 (1) 1011000111" source="15034" target="14563" cy:directed="1"/>
      <edge id="19613" label="1011000101 (1) 1011100101" source="15034" target="14909" cy:directed="1"/>
      <edge id="19612" label="1011000101 (1) 1010000101" source="15034" target="15094" cy:directed="1"/>
      <edge id="19611" label="1011000101 (1) 1111000101" source="15034" target="15024" cy:directed="1"/>
      <edge id="19610" label="1011000101 (1) 0011000101" source="15034" target="15039" cy:directed="1"/>
      <edge id="19609" label="1011000110 (1) 1011000111" source="15033" target="14563" cy:directed="1"/>
      <edge id="19608" label="1011000110 (1) 1011000010" source="15033" target="15318" cy:directed="1"/>
      <edge id="19607" label="1011000110 (1) 1011100110" source="15033" target="14562" cy:directed="1"/>
      <edge id="19606" label="1011000110 (1) 1010000110" source="15033" target="15093" cy:directed="1"/>
      <edge id="19605" label="1011000110 (1) 1111000110" source="15033" target="15023" cy:directed="1"/>
      <edge id="19604" label="1011000110 (1) 0011000110" source="15033" target="15038" cy:directed="1"/>
      <edge id="19603" label="1011100100 (1) 1011100101" source="15032" target="14909" cy:directed="1"/>
      <edge id="19602" label="1011100100 (1) 1011100000" source="15032" target="15278" cy:directed="1"/>
      <edge id="19601" label="1011100100 (1) 1011110100" source="15032" target="14908" cy:directed="1"/>
      <edge id="19600" label="1011100100 (1) 1010100100" source="15032" target="15092" cy:directed="1"/>
      <edge id="19599" label="1011100100 (1) 1111100100" source="15032" target="15022" cy:directed="1"/>
      <edge id="19598" label="1011100100 (1) 0011100100" source="15032" target="15037" cy:directed="1"/>
      <edge id="19597" label="1111000100 (1) 1111000101" source="15031" target="15024" cy:directed="1"/>
      <edge id="19596" label="1111000100 (1) 1111000110" source="15031" target="15023" cy:directed="1"/>
      <edge id="19595" label="1111000100 (1) 1111000000" source="15031" target="15317" cy:directed="1"/>
      <edge id="19594" label="1111000100 (1) 1111100100" source="15031" target="15022" cy:directed="1"/>
      <edge id="19593" label="1111000100 (1) 1110000100" source="15031" target="15091" cy:directed="1"/>
      <edge id="19592" label="1111000100 (1) 1101000100" source="15031" target="15120" cy:directed="1"/>
      <edge id="19591" label="1111000100 (1) 0111000100" source="15031" target="15021" cy:directed="1"/>
      <edge id="19590" label="0100011001 (1) 0100011000" source="15030" target="15255" cy:directed="1"/>
      <edge id="19589" label="0100011001 (1) 0100011011" source="15030" target="14557" cy:directed="1"/>
      <edge id="19588" label="0100011001 (1) 0100011101" source="15030" target="14669" cy:directed="1"/>
      <edge id="19587" label="0100011001 (1) 0100001001" source="15030" target="15204" cy:directed="1"/>
      <edge id="19586" label="0100011001 (1) 0101011001" source="15030" target="14971" cy:directed="1"/>
      <edge id="19585" label="0100011001 (1) 0000011001" source="15030" target="15045" cy:directed="1"/>
      <edge id="19584" label="0100011001 (1) 1100011001" source="15030" target="15027" cy:directed="1"/>
      <edge id="19583" label="0100011010 (1) 0100011011" source="15029" target="14557" cy:directed="1"/>
      <edge id="19582" label="0100011010 (1) 0100011110" source="15029" target="14668" cy:directed="1"/>
      <edge id="19581" label="0100011010 (1) 0100010010" source="15029" target="15256" cy:directed="1"/>
      <edge id="19580" label="0100011010 (1) 0100001010" source="15029" target="15203" cy:directed="1"/>
      <edge id="19579" label="0100011010 (1) 0101011010" source="15029" target="14970" cy:directed="1"/>
      <edge id="19578" label="0100011010 (1) 0000011010" source="15029" target="15044" cy:directed="1"/>
      <edge id="19577" label="0100011010 (1) 1100011010" source="15029" target="15026" cy:directed="1"/>
      <edge id="19576" label="0100011100 (1) 0100011101" source="15028" target="14669" cy:directed="1"/>
      <edge id="19575" label="0100011100 (1) 0100011110" source="15028" target="14668" cy:directed="1"/>
      <edge id="19574" label="0100011100 (1) 0100001100" source="15028" target="14827" cy:directed="1"/>
      <edge id="19573" label="0100011100 (1) 0101011100" source="15028" target="14969" cy:directed="1"/>
      <edge id="19572" label="0100011100 (1) 0000011100" source="15028" target="15043" cy:directed="1"/>
      <edge id="19571" label="0100011100 (1) 1100011100" source="15028" target="15025" cy:directed="1"/>
      <edge id="19570" label="1100011001 (1) 1100011000" source="15027" target="15260" cy:directed="1"/>
      <edge id="19569" label="1100011001 (1) 1100011011" source="15027" target="14554" cy:directed="1"/>
      <edge id="19568" label="1100011001 (1) 1100011101" source="15027" target="14667" cy:directed="1"/>
      <edge id="19567" label="1100011001 (1) 1100001001" source="15027" target="15208" cy:directed="1"/>
      <edge id="19566" label="1100011001 (1) 1101011001" source="15027" target="14968" cy:directed="1"/>
      <edge id="19565" label="1100011001 (1) 1000011001" source="15027" target="15042" cy:directed="1"/>
      <edge id="19564" label="1100011001 (1) 0100011001" source="15027" target="15030" cy:directed="1"/>
      <edge id="19563" label="1100011010 (1) 1100011011" source="15026" target="14554" cy:directed="1"/>
      <edge id="19562" label="1100011010 (1) 1100011110" source="15026" target="14666" cy:directed="1"/>
      <edge id="19561" label="1100011010 (1) 1100010010" source="15026" target="15261" cy:directed="1"/>
      <edge id="19560" label="1100011010 (1) 1100001010" source="15026" target="15207" cy:directed="1"/>
      <edge id="19559" label="1100011010 (1) 1101011010" source="15026" target="14967" cy:directed="1"/>
      <edge id="19558" label="1100011010 (1) 1000011010" source="15026" target="15041" cy:directed="1"/>
      <edge id="19557" label="1100011010 (1) 0100011010" source="15026" target="15029" cy:directed="1"/>
      <edge id="19556" label="1100011100 (1) 1100011101" source="15025" target="14667" cy:directed="1"/>
      <edge id="19555" label="1100011100 (1) 1100011110" source="15025" target="14666" cy:directed="1"/>
      <edge id="19554" label="1100011100 (1) 1100001100" source="15025" target="14840" cy:directed="1"/>
      <edge id="19553" label="1100011100 (1) 1101011100" source="15025" target="14966" cy:directed="1"/>
      <edge id="19552" label="1100011100 (1) 1000011100" source="15025" target="15040" cy:directed="1"/>
      <edge id="19551" label="1100011100 (1) 0100011100" source="15025" target="15028" cy:directed="1"/>
      <edge id="19550" label="1111000101 (1) 1111000100" source="15024" target="15031" cy:directed="1"/>
      <edge id="19549" label="1111000101 (1) 1111000111" source="15024" target="14549" cy:directed="1"/>
      <edge id="19548" label="1111000101 (1) 1111100101" source="15024" target="14899" cy:directed="1"/>
      <edge id="19547" label="1111000101 (1) 1110000101" source="15024" target="15080" cy:directed="1"/>
      <edge id="19546" label="1111000101 (1) 1101000101" source="15024" target="15055" cy:directed="1"/>
      <edge id="19545" label="1111000101 (1) 0111000101" source="15024" target="15020" cy:directed="1"/>
      <edge id="19544" label="1111000110 (1) 1111000111" source="15023" target="14549" cy:directed="1"/>
      <edge id="19543" label="1111000110 (1) 1111000010" source="15023" target="15315" cy:directed="1"/>
      <edge id="19542" label="1111000110 (1) 1111100110" source="15023" target="14548" cy:directed="1"/>
      <edge id="19541" label="1111000110 (1) 1110000110" source="15023" target="15079" cy:directed="1"/>
      <edge id="19540" label="1111000110 (1) 1101000110" source="15023" target="15054" cy:directed="1"/>
      <edge id="19539" label="1111000110 (1) 0111000110" source="15023" target="15019" cy:directed="1"/>
      <edge id="19538" label="1111100100 (1) 1111100101" source="15022" target="14899" cy:directed="1"/>
      <edge id="19537" label="1111100100 (1) 1111100000" source="15022" target="15314" cy:directed="1"/>
      <edge id="19536" label="1111100100 (1) 1111110100" source="15022" target="14898" cy:directed="1"/>
      <edge id="19535" label="1111100100 (1) 1110100100" source="15022" target="15078" cy:directed="1"/>
      <edge id="19534" label="1111100100 (1) 1101100100" source="15022" target="15053" cy:directed="1"/>
      <edge id="19533" label="1111100100 (1) 0111100100" source="15022" target="15018" cy:directed="1"/>
      <edge id="19532" label="0111000100 (1) 0111000101" source="15021" target="15020" cy:directed="1"/>
      <edge id="19531" label="0111000100 (1) 0111000110" source="15021" target="15019" cy:directed="1"/>
      <edge id="19530" label="0111000100 (1) 0111000000" source="15021" target="15313" cy:directed="1"/>
      <edge id="19529" label="0111000100 (1) 0111100100" source="15021" target="15018" cy:directed="1"/>
      <edge id="19528" label="0111000100 (1) 0110000100" source="15021" target="15077" cy:directed="1"/>
      <edge id="19527" label="0111000100 (1) 0101000100" source="15021" target="15115" cy:directed="1"/>
      <edge id="19526" label="0111000100 (1) 0011000100" source="15021" target="15060" cy:directed="1"/>
      <edge id="19525" label="0111000100 (1) 1111000100" source="15021" target="15031" cy:directed="1"/>
      <edge id="19524" label="0111000101 (1) 0111000100" source="15020" target="15021" cy:directed="1"/>
      <edge id="19523" label="0111000101 (1) 0111000111" source="15020" target="14547" cy:directed="1"/>
      <edge id="19522" label="0111000101 (1) 0111100101" source="15020" target="14897" cy:directed="1"/>
      <edge id="19521" label="0111000101 (1) 0110000101" source="15020" target="15076" cy:directed="1"/>
      <edge id="19520" label="0111000101 (1) 0101000101" source="15020" target="15052" cy:directed="1"/>
      <edge id="19519" label="0111000101 (1) 0011000101" source="15020" target="15039" cy:directed="1"/>
      <edge id="19518" label="0111000101 (1) 1111000101" source="15020" target="15024" cy:directed="1"/>
      <edge id="19517" label="0111000110 (1) 0111000111" source="15019" target="14547" cy:directed="1"/>
      <edge id="19516" label="0111000110 (1) 0111000010" source="15019" target="15311" cy:directed="1"/>
      <edge id="19515" label="0111000110 (1) 0111100110" source="15019" target="14546" cy:directed="1"/>
      <edge id="19514" label="0111000110 (1) 0110000110" source="15019" target="15075" cy:directed="1"/>
      <edge id="19513" label="0111000110 (1) 0101000110" source="15019" target="15051" cy:directed="1"/>
      <edge id="19512" label="0111000110 (1) 0011000110" source="15019" target="15038" cy:directed="1"/>
      <edge id="19511" label="0111000110 (1) 1111000110" source="15019" target="15023" cy:directed="1"/>
      <edge id="19510" label="0111100100 (1) 0111100101" source="15018" target="14897" cy:directed="1"/>
      <edge id="19509" label="0111100100 (1) 0111100000" source="15018" target="15310" cy:directed="1"/>
      <edge id="19508" label="0111100100 (1) 0111110100" source="15018" target="14896" cy:directed="1"/>
      <edge id="19507" label="0111100100 (1) 0110100100" source="15018" target="15074" cy:directed="1"/>
      <edge id="19506" label="0111100100 (1) 0101100100" source="15018" target="15050" cy:directed="1"/>
      <edge id="19505" label="0111100100 (1) 0011100100" source="15018" target="15037" cy:directed="1"/>
      <edge id="19504" label="0111100100 (1) 1111100100" source="15018" target="15022" cy:directed="1"/>
      <edge id="19503" label="0000000011 (1) 0000000010" source="15017" target="15359" cy:directed="1"/>
      <edge id="19502" label="0000000011 (1) 0000000111" source="15017" target="14661" cy:directed="1"/>
      <edge id="19501" label="0000000011 (1) 0001000011" source="15017" target="14965" cy:directed="1"/>
      <edge id="19500" label="0000000011 (1) 1000000011" source="15017" target="15016" cy:directed="1"/>
      <edge id="19499" label="1000000011 (1) 1000000010" source="15016" target="15355" cy:directed="1"/>
      <edge id="19498" label="1000000011 (1) 1000000111" source="15016" target="14663" cy:directed="1"/>
      <edge id="19497" label="1000000011 (1) 1001000011" source="15016" target="14964" cy:directed="1"/>
      <edge id="19496" label="1000000011 (1) 1100000011" source="15016" target="15013" cy:directed="1"/>
      <edge id="19495" label="1000000011 (1) 0000000011" source="15016" target="15017" cy:directed="1"/>
      <edge id="19494" label="1000100101 (1) 1000100100" source="15015" target="15138" cy:directed="1"/>
      <edge id="19493" label="1000100101 (1) 1000110101" source="15015" target="14796" cy:directed="1"/>
      <edge id="19492" label="1000100101 (1) 1001100101" source="15015" target="14959" cy:directed="1"/>
      <edge id="19491" label="1000100101 (1) 1010100101" source="15015" target="14984" cy:directed="1"/>
      <edge id="19490" label="1000100101 (1) 1100100101" source="15015" target="14996" cy:directed="1"/>
      <edge id="19489" label="1000100101 (1) 0000100101" source="15015" target="15011" cy:directed="1"/>
      <edge id="19488" label="1000110100 (1) 1000110101" source="15014" target="14796" cy:directed="1"/>
      <edge id="19487" label="1000110100 (1) 1000110000" source="15014" target="15307" cy:directed="1"/>
      <edge id="19486" label="1000110100 (1) 1000111100" source="15014" target="14919" cy:directed="1"/>
      <edge id="19485" label="1000110100 (1) 1001110100" source="15014" target="14958" cy:directed="1"/>
      <edge id="19484" label="1000110100 (1) 1010110100" source="15014" target="14983" cy:directed="1"/>
      <edge id="19483" label="1000110100 (1) 0000110100" source="15014" target="15010" cy:directed="1"/>
      <edge id="19482" label="1100000011 (1) 1100000010" source="15013" target="15347" cy:directed="1"/>
      <edge id="19481" label="1100000011 (1) 1100000111" source="15013" target="14645" cy:directed="1"/>
      <edge id="19480" label="1100000011 (1) 1101000011" source="15013" target="14961" cy:directed="1"/>
      <edge id="19479" label="1100000011 (1) 0100000011" source="15013" target="15012" cy:directed="1"/>
      <edge id="19478" label="0100000011 (1) 0100000010" source="15012" target="15350" cy:directed="1"/>
      <edge id="19477" label="0100000011 (1) 0100000111" source="15012" target="14648" cy:directed="1"/>
      <edge id="19476" label="0100000011 (1) 0101000011" source="15012" target="14957" cy:directed="1"/>
      <edge id="19475" label="0100000011 (1) 0000000011" source="15012" target="15017" cy:directed="1"/>
      <edge id="19474" label="0100000011 (1) 1100000011" source="15012" target="15013" cy:directed="1"/>
      <edge id="19473" label="0000100101 (1) 0000100100" source="15011" target="15144" cy:directed="1"/>
      <edge id="19472" label="0000100101 (1) 0000110101" source="15011" target="14790" cy:directed="1"/>
      <edge id="19471" label="0000100101 (1) 0001100101" source="15011" target="14963" cy:directed="1"/>
      <edge id="19470" label="0000100101 (1) 0010100101" source="15011" target="14987" cy:directed="1"/>
      <edge id="19469" label="0000100101 (1) 1000100101" source="15011" target="15015" cy:directed="1"/>
      <edge id="19468" label="0000110100 (1) 0000110101" source="15010" target="14790" cy:directed="1"/>
      <edge id="19467" label="0000110100 (1) 0000110000" source="15010" target="15301" cy:directed="1"/>
      <edge id="19466" label="0000110100 (1) 0000111100" source="15010" target="14916" cy:directed="1"/>
      <edge id="19465" label="0000110100 (1) 0001110100" source="15010" target="14962" cy:directed="1"/>
      <edge id="19464" label="0000110100 (1) 0010110100" source="15010" target="14986" cy:directed="1"/>
      <edge id="19463" label="0000110100 (1) 1000110100" source="15010" target="15014" cy:directed="1"/>
      <edge id="19462" label="0011101001 (1) 0011101000" source="15009" target="15048" cy:directed="1"/>
      <edge id="19461" label="0011101001 (1) 0011101101" source="15009" target="14642" cy:directed="1"/>
      <edge id="19460" label="0011101001 (1) 0011100001" source="15009" target="15253" cy:directed="1"/>
      <edge id="19459" label="0011101001 (1) 0011111001" source="15009" target="14795" cy:directed="1"/>
      <edge id="19458" label="0011101001 (1) 0011001001" source="15009" target="15133" cy:directed="1"/>
      <edge id="19457" label="0011101001 (1) 0010101001" source="15009" target="15069" cy:directed="1"/>
      <edge id="19456" label="0011101001 (1) 1011101001" source="15009" target="15008" cy:directed="1"/>
      <edge id="19455" label="1011101001 (1) 1011101000" source="15008" target="15046" cy:directed="1"/>
      <edge id="19454" label="1011101001 (1) 1011101101" source="15008" target="14643" cy:directed="1"/>
      <edge id="19453" label="1011101001 (1) 1011100001" source="15008" target="15251" cy:directed="1"/>
      <edge id="19452" label="1011101001 (1) 1011111001" source="15008" target="14793" cy:directed="1"/>
      <edge id="19451" label="1011101001 (1) 1011001001" source="15008" target="15130" cy:directed="1"/>
      <edge id="19450" label="1011101001 (1) 1010101001" source="15008" target="15068" cy:directed="1"/>
      <edge id="19449" label="1011101001 (1) 1111101001" source="15008" target="14991" cy:directed="1"/>
      <edge id="19448" label="1011101001 (1) 0011101001" source="15008" target="15009" cy:directed="1"/>
      <edge id="19447" label="0010011001 (1) 0010011000" source="15007" target="15242" cy:directed="1"/>
      <edge id="19446" label="0010011001 (1) 0010011011" source="15007" target="14541" cy:directed="1"/>
      <edge id="19445" label="0010011001 (1) 0010011101" source="15007" target="14655" cy:directed="1"/>
      <edge id="19444" label="0010011001 (1) 0010001001" source="15007" target="15180" cy:directed="1"/>
      <edge id="19443" label="0010011001 (1) 0000011001" source="15007" target="15045" cy:directed="1"/>
      <edge id="19442" label="0010011001 (1) 1010011001" source="15007" target="15004" cy:directed="1"/>
      <edge id="19441" label="0010011010 (1) 0010011011" source="15006" target="14541" cy:directed="1"/>
      <edge id="19440" label="0010011010 (1) 0010011110" source="15006" target="14654" cy:directed="1"/>
      <edge id="19439" label="0010011010 (1) 0010010010" source="15006" target="15243" cy:directed="1"/>
      <edge id="19438" label="0010011010 (1) 0010001010" source="15006" target="15179" cy:directed="1"/>
      <edge id="19437" label="0010011010 (1) 0000011010" source="15006" target="15044" cy:directed="1"/>
      <edge id="19436" label="0010011010 (1) 1010011010" source="15006" target="15003" cy:directed="1"/>
      <edge id="19435" label="0010011100 (1) 0010011101" source="15005" target="14655" cy:directed="1"/>
      <edge id="19434" label="0010011100 (1) 0010011110" source="15005" target="14654" cy:directed="1"/>
      <edge id="19433" label="0010011100 (1) 0010001100" source="15005" target="14846" cy:directed="1"/>
      <edge id="19432" label="0010011100 (1) 1010011100" source="15005" target="15002" cy:directed="1"/>
      <edge id="19431" label="1010011001 (1) 1010011000" source="15004" target="15246" cy:directed="1"/>
      <edge id="19430" label="1010011001 (1) 1010011011" source="15004" target="14540" cy:directed="1"/>
      <edge id="19429" label="1010011001 (1) 1010011101" source="15004" target="14651" cy:directed="1"/>
      <edge id="19428" label="1010011001 (1) 1010001001" source="15004" target="15184" cy:directed="1"/>
      <edge id="19427" label="1010011001 (1) 1000011001" source="15004" target="15042" cy:directed="1"/>
      <edge id="19426" label="1010011001 (1) 0010011001" source="15004" target="15007" cy:directed="1"/>
      <edge id="19425" label="1010011010 (1) 1010011011" source="15003" target="14540" cy:directed="1"/>
      <edge id="19424" label="1010011010 (1) 1010011110" source="15003" target="14650" cy:directed="1"/>
      <edge id="19423" label="1010011010 (1) 1010010010" source="15003" target="15247" cy:directed="1"/>
      <edge id="19422" label="1010011010 (1) 1010001010" source="15003" target="15183" cy:directed="1"/>
      <edge id="19421" label="1010011010 (1) 1000011010" source="15003" target="15041" cy:directed="1"/>
      <edge id="19420" label="1010011010 (1) 0010011010" source="15003" target="15006" cy:directed="1"/>
      <edge id="19419" label="1010011100 (1) 1010011101" source="15002" target="14651" cy:directed="1"/>
      <edge id="19418" label="1010011100 (1) 1010011110" source="15002" target="14650" cy:directed="1"/>
      <edge id="19417" label="1010011100 (1) 1010001100" source="15002" target="14841" cy:directed="1"/>
      <edge id="19416" label="1010011100 (1) 0010011100" source="15002" target="15005" cy:directed="1"/>
      <edge id="19415" label="0100100101 (1) 0100100100" source="15001" target="15116" cy:directed="1"/>
      <edge id="19414" label="0100100101 (1) 0100110101" source="15001" target="14779" cy:directed="1"/>
      <edge id="19413" label="0100100101 (1) 0101100101" source="15001" target="14937" cy:directed="1"/>
      <edge id="19412" label="0100100101 (1) 0000100101" source="15001" target="15011" cy:directed="1"/>
      <edge id="19411" label="0100100101 (1) 1100100101" source="15001" target="14996" cy:directed="1"/>
      <edge id="19410" label="0100110100 (1) 0100110101" source="15000" target="14779" cy:directed="1"/>
      <edge id="19409" label="0100110100 (1) 0100110000" source="15000" target="15296" cy:directed="1"/>
      <edge id="19408" label="0100110100 (1) 0100111100" source="15000" target="14912" cy:directed="1"/>
      <edge id="19407" label="0100110100 (1) 0101110100" source="15000" target="14936" cy:directed="1"/>
      <edge id="19406" label="0100110100 (1) 0000110100" source="15000" target="15010" cy:directed="1"/>
      <edge id="19405" label="0100110100 (1) 1100110100" source="15000" target="14995" cy:directed="1"/>
      <edge id="19404" label="1110011001 (1) 1110011000" source="14999" target="15230" cy:directed="1"/>
      <edge id="19403" label="1110011001 (1) 1110011011" source="14999" target="14531" cy:directed="1"/>
      <edge id="19402" label="1110011001 (1) 1110011101" source="14999" target="14640" cy:directed="1"/>
      <edge id="19401" label="1110011001 (1) 1110001001" source="14999" target="15174" cy:directed="1"/>
      <edge id="19400" label="1110011001 (1) 1100011001" source="14999" target="15027" cy:directed="1"/>
      <edge id="19399" label="1110011001 (1) 1010011001" source="14999" target="15004" cy:directed="1"/>
      <edge id="19398" label="1110011001 (1) 0110011001" source="14999" target="14994" cy:directed="1"/>
      <edge id="19397" label="1110011010 (1) 1110011011" source="14998" target="14531" cy:directed="1"/>
      <edge id="19396" label="1110011010 (1) 1110011110" source="14998" target="14639" cy:directed="1"/>
      <edge id="19395" label="1110011010 (1) 1110010010" source="14998" target="15231" cy:directed="1"/>
      <edge id="19394" label="1110011010 (1) 1110001010" source="14998" target="15173" cy:directed="1"/>
      <edge id="19393" label="1110011010 (1) 1100011010" source="14998" target="15026" cy:directed="1"/>
      <edge id="19392" label="1110011010 (1) 1010011010" source="14998" target="15003" cy:directed="1"/>
      <edge id="19391" label="1110011010 (1) 0110011010" source="14998" target="14993" cy:directed="1"/>
      <edge id="19390" label="1110011100 (1) 1110011101" source="14997" target="14640" cy:directed="1"/>
      <edge id="19389" label="1110011100 (1) 1110011110" source="14997" target="14639" cy:directed="1"/>
      <edge id="19388" label="1110011100 (1) 1110001100" source="14997" target="14802" cy:directed="1"/>
      <edge id="19387" label="1110011100 (1) 1100011100" source="14997" target="15025" cy:directed="1"/>
      <edge id="19386" label="1110011100 (1) 1010011100" source="14997" target="15002" cy:directed="1"/>
      <edge id="19385" label="1110011100 (1) 0110011100" source="14997" target="14992" cy:directed="1"/>
      <edge id="19384" label="1100100101 (1) 1100100100" source="14996" target="15121" cy:directed="1"/>
      <edge id="19383" label="1100100101 (1) 1100110101" source="14996" target="14778" cy:directed="1"/>
      <edge id="19382" label="1100100101 (1) 1101100101" source="14996" target="14939" cy:directed="1"/>
      <edge id="19381" label="1100100101 (1) 0100100101" source="14996" target="15001" cy:directed="1"/>
      <edge id="19380" label="1100110100 (1) 1100110101" source="14995" target="14778" cy:directed="1"/>
      <edge id="19379" label="1100110100 (1) 1100110000" source="14995" target="15294" cy:directed="1"/>
      <edge id="19378" label="1100110100 (1) 1100111100" source="14995" target="14906" cy:directed="1"/>
      <edge id="19377" label="1100110100 (1) 1101110100" source="14995" target="14938" cy:directed="1"/>
      <edge id="19376" label="1100110100 (1) 1000110100" source="14995" target="15014" cy:directed="1"/>
      <edge id="19375" label="1100110100 (1) 0100110100" source="14995" target="15000" cy:directed="1"/>
      <edge id="19374" label="0110011001 (1) 0110011000" source="14994" target="15234" cy:directed="1"/>
      <edge id="19373" label="0110011001 (1) 0110011011" source="14994" target="14528" cy:directed="1"/>
      <edge id="19372" label="0110011001 (1) 0110011101" source="14994" target="14637" cy:directed="1"/>
      <edge id="19371" label="0110011001 (1) 0110001001" source="14994" target="15171" cy:directed="1"/>
      <edge id="19370" label="0110011001 (1) 0100011001" source="14994" target="15030" cy:directed="1"/>
      <edge id="19369" label="0110011001 (1) 0010011001" source="14994" target="15007" cy:directed="1"/>
      <edge id="19368" label="0110011001 (1) 1110011001" source="14994" target="14999" cy:directed="1"/>
      <edge id="19367" label="0110011010 (1) 0110011011" source="14993" target="14528" cy:directed="1"/>
      <edge id="19366" label="0110011010 (1) 0110011110" source="14993" target="14636" cy:directed="1"/>
      <edge id="19365" label="0110011010 (1) 0110010010" source="14993" target="15235" cy:directed="1"/>
      <edge id="19364" label="0110011010 (1) 0110001010" source="14993" target="15170" cy:directed="1"/>
      <edge id="19363" label="0110011010 (1) 0100011010" source="14993" target="15029" cy:directed="1"/>
      <edge id="19362" label="0110011010 (1) 0010011010" source="14993" target="15006" cy:directed="1"/>
      <edge id="19361" label="0110011010 (1) 1110011010" source="14993" target="14998" cy:directed="1"/>
      <edge id="19360" label="0110011100 (1) 0110011101" source="14992" target="14637" cy:directed="1"/>
      <edge id="19359" label="0110011100 (1) 0110011110" source="14992" target="14636" cy:directed="1"/>
      <edge id="19358" label="0110011100 (1) 0110001100" source="14992" target="14782" cy:directed="1"/>
      <edge id="19357" label="0110011100 (1) 0100011100" source="14992" target="15028" cy:directed="1"/>
      <edge id="19356" label="0110011100 (1) 0010011100" source="14992" target="15005" cy:directed="1"/>
      <edge id="19355" label="0110011100 (1) 1110011100" source="14992" target="14997" cy:directed="1"/>
      <edge id="19354" label="1111101001 (1) 1111101000" source="14991" target="15112" cy:directed="1"/>
      <edge id="19353" label="1111101001 (1) 1111101101" source="14991" target="14635" cy:directed="1"/>
      <edge id="19352" label="1111101001 (1) 1111100001" source="14991" target="15241" cy:directed="1"/>
      <edge id="19351" label="1111101001 (1) 1111111001" source="14991" target="14775" cy:directed="1"/>
      <edge id="19350" label="1111101001 (1) 1110101001" source="14991" target="15066" cy:directed="1"/>
      <edge id="19349" label="1111101001 (1) 1101101001" source="14991" target="15036" cy:directed="1"/>
      <edge id="19348" label="1111101001 (1) 0111101001" source="14991" target="14990" cy:directed="1"/>
      <edge id="19347" label="0111101001 (1) 0111101000" source="14990" target="15108" cy:directed="1"/>
      <edge id="19346" label="0111101001 (1) 0111101101" source="14990" target="14634" cy:directed="1"/>
      <edge id="19345" label="0111101001 (1) 0111100001" source="14990" target="15239" cy:directed="1"/>
      <edge id="19344" label="0111101001 (1) 0111111001" source="14990" target="14777" cy:directed="1"/>
      <edge id="19343" label="0111101001 (1) 0110101001" source="14990" target="15064" cy:directed="1"/>
      <edge id="19342" label="0111101001 (1) 0101101001" source="14990" target="15035" cy:directed="1"/>
      <edge id="19341" label="0111101001 (1) 0011101001" source="14990" target="15009" cy:directed="1"/>
      <edge id="19340" label="0111101001 (1) 1111101001" source="14990" target="14991" cy:directed="1"/>
      <edge id="19339" label="0010000011 (1) 0010000010" source="14989" target="15339" cy:directed="1"/>
      <edge id="19338" label="0010000011 (1) 0010000111" source="14989" target="14622" cy:directed="1"/>
      <edge id="19337" label="0010000011 (1) 0000000011" source="14989" target="15017" cy:directed="1"/>
      <edge id="19336" label="0010000011 (1) 1010000011" source="14989" target="14988" cy:directed="1"/>
      <edge id="19335" label="1010000011 (1) 1010000010" source="14988" target="15343" cy:directed="1"/>
      <edge id="19334" label="1010000011 (1) 1010000111" source="14988" target="14620" cy:directed="1"/>
      <edge id="19333" label="1010000011 (1) 1000000011" source="14988" target="15016" cy:directed="1"/>
      <edge id="19332" label="1010000011 (1) 1110000011" source="14988" target="14985" cy:directed="1"/>
      <edge id="19331" label="1010000011 (1) 0010000011" source="14988" target="14989" cy:directed="1"/>
      <edge id="19330" label="0010100101 (1) 0010100100" source="14987" target="15088" cy:directed="1"/>
      <edge id="19329" label="0010100101 (1) 0010110101" source="14987" target="14766" cy:directed="1"/>
      <edge id="19328" label="0010100101 (1) 1010100101" source="14987" target="14984" cy:directed="1"/>
      <edge id="19327" label="0010110100 (1) 0010110101" source="14986" target="14766" cy:directed="1"/>
      <edge id="19326" label="0010110100 (1) 0010110000" source="14986" target="15292" cy:directed="1"/>
      <edge id="19325" label="0010110100 (1) 0010111100" source="14986" target="14877" cy:directed="1"/>
      <edge id="19324" label="0010110100 (1) 1010110100" source="14986" target="14983" cy:directed="1"/>
      <edge id="19323" label="1110000011 (1) 1110000010" source="14985" target="15337" cy:directed="1"/>
      <edge id="19322" label="1110000011 (1) 1110000111" source="14985" target="14612" cy:directed="1"/>
      <edge id="19321" label="1110000011 (1) 1100000011" source="14985" target="15013" cy:directed="1"/>
      <edge id="19320" label="1110000011 (1) 0110000011" source="14985" target="14982" cy:directed="1"/>
      <edge id="19319" label="1010100101 (1) 1010100100" source="14984" target="15092" cy:directed="1"/>
      <edge id="19318" label="1010100101 (1) 1010110101" source="14984" target="14767" cy:directed="1"/>
      <edge id="19317" label="1010100101 (1) 1110100101" source="14984" target="14981" cy:directed="1"/>
      <edge id="19316" label="1010100101 (1) 0010100101" source="14984" target="14987" cy:directed="1"/>
      <edge id="19315" label="1010110100 (1) 1010110101" source="14983" target="14767" cy:directed="1"/>
      <edge id="19314" label="1010110100 (1) 1010110000" source="14983" target="15290" cy:directed="1"/>
      <edge id="19313" label="1010110100 (1) 1010111100" source="14983" target="14875" cy:directed="1"/>
      <edge id="19312" label="1010110100 (1) 0010110100" source="14983" target="14986" cy:directed="1"/>
      <edge id="19311" label="0110000011 (1) 0110000010" source="14982" target="15334" cy:directed="1"/>
      <edge id="19310" label="0110000011 (1) 0110000111" source="14982" target="14609" cy:directed="1"/>
      <edge id="19309" label="0110000011 (1) 0100000011" source="14982" target="15012" cy:directed="1"/>
      <edge id="19308" label="0110000011 (1) 0010000011" source="14982" target="14989" cy:directed="1"/>
      <edge id="19307" label="0110000011 (1) 1110000011" source="14982" target="14985" cy:directed="1"/>
      <edge id="19306" label="1110100101 (1) 1110100100" source="14981" target="15078" cy:directed="1"/>
      <edge id="19305" label="1110100101 (1) 1110110101" source="14981" target="14746" cy:directed="1"/>
      <edge id="19304" label="1110100101 (1) 1100100101" source="14981" target="14996" cy:directed="1"/>
      <edge id="19303" label="1110100101 (1) 0110100101" source="14981" target="14979" cy:directed="1"/>
      <edge id="19302" label="1110110100 (1) 1110110101" source="14980" target="14746" cy:directed="1"/>
      <edge id="19301" label="1110110100 (1) 1110110000" source="14980" target="15287" cy:directed="1"/>
      <edge id="19300" label="1110110100 (1) 1110111100" source="14980" target="14868" cy:directed="1"/>
      <edge id="19299" label="1110110100 (1) 1100110100" source="14980" target="14995" cy:directed="1"/>
      <edge id="19298" label="1110110100 (1) 1010110100" source="14980" target="14983" cy:directed="1"/>
      <edge id="19297" label="1110110100 (1) 0110110100" source="14980" target="14978" cy:directed="1"/>
      <edge id="19296" label="0110100101 (1) 0110100100" source="14979" target="15074" cy:directed="1"/>
      <edge id="19295" label="0110100101 (1) 0110110101" source="14979" target="14747" cy:directed="1"/>
      <edge id="19294" label="0110100101 (1) 0100100101" source="14979" target="15001" cy:directed="1"/>
      <edge id="19293" label="0110100101 (1) 0010100101" source="14979" target="14987" cy:directed="1"/>
      <edge id="19292" label="0110100101 (1) 1110100101" source="14979" target="14981" cy:directed="1"/>
      <edge id="19291" label="0110110100 (1) 0110110101" source="14978" target="14747" cy:directed="1"/>
      <edge id="19290" label="0110110100 (1) 0110110000" source="14978" target="15284" cy:directed="1"/>
      <edge id="19289" label="0110110100 (1) 0110111100" source="14978" target="14866" cy:directed="1"/>
      <edge id="19288" label="0110110100 (1) 0100110100" source="14978" target="15000" cy:directed="1"/>
      <edge id="19287" label="0110110100 (1) 0010110100" source="14978" target="14986" cy:directed="1"/>
      <edge id="19286" label="0110110100 (1) 1110110100" source="14978" target="14980" cy:directed="1"/>
      <edge id="19285" label="0001011001 (1) 0001011000" source="14977" target="15227" cy:directed="1"/>
      <edge id="19284" label="0001011001 (1) 0001011011" source="14977" target="14515" cy:directed="1"/>
      <edge id="19283" label="0001011001 (1) 0001011101" source="14977" target="14607" cy:directed="1"/>
      <edge id="19282" label="0001011001 (1) 0001001001" source="14977" target="15161" cy:directed="1"/>
      <edge id="19281" label="0001011001 (1) 1001011001" source="14977" target="14974" cy:directed="1"/>
      <edge id="19280" label="0001011010 (1) 0001011011" source="14976" target="14515" cy:directed="1"/>
      <edge id="19279" label="0001011010 (1) 0001011110" source="14976" target="14606" cy:directed="1"/>
      <edge id="19278" label="0001011010 (1) 0001010010" source="14976" target="15228" cy:directed="1"/>
      <edge id="19277" label="0001011010 (1) 0001001010" source="14976" target="15160" cy:directed="1"/>
      <edge id="19276" label="0001011010 (1) 1001011010" source="14976" target="14973" cy:directed="1"/>
      <edge id="19275" label="0001011100 (1) 0001011101" source="14975" target="14607" cy:directed="1"/>
      <edge id="19274" label="0001011100 (1) 0001011110" source="14975" target="14606" cy:directed="1"/>
      <edge id="19273" label="0001011100 (1) 0001001100" source="14975" target="14847" cy:directed="1"/>
      <edge id="19272" label="0001011100 (1) 0011011100" source="14975" target="14947" cy:directed="1"/>
      <edge id="19271" label="0001011100 (1) 1001011100" source="14975" target="14972" cy:directed="1"/>
      <edge id="19270" label="1001011001 (1) 1001011000" source="14974" target="15224" cy:directed="1"/>
      <edge id="19269" label="1001011001 (1) 1001011011" source="14974" target="14514" cy:directed="1"/>
      <edge id="19268" label="1001011001 (1) 1001011101" source="14974" target="14605" cy:directed="1"/>
      <edge id="19267" label="1001011001 (1) 1001001001" source="14974" target="15159" cy:directed="1"/>
      <edge id="19266" label="1001011001 (1) 0001011001" source="14974" target="14977" cy:directed="1"/>
      <edge id="19265" label="1001011010 (1) 1001011011" source="14973" target="14514" cy:directed="1"/>
      <edge id="19264" label="1001011010 (1) 1001011110" source="14973" target="14604" cy:directed="1"/>
      <edge id="19263" label="1001011010 (1) 1001010010" source="14973" target="15225" cy:directed="1"/>
      <edge id="19262" label="1001011010 (1) 1001001010" source="14973" target="15158" cy:directed="1"/>
      <edge id="19261" label="1001011010 (1) 0001011010" source="14973" target="14976" cy:directed="1"/>
      <edge id="19260" label="1001011100 (1) 1001011101" source="14972" target="14605" cy:directed="1"/>
      <edge id="19259" label="1001011100 (1) 1001011110" source="14972" target="14604" cy:directed="1"/>
      <edge id="19258" label="1001011100 (1) 1001001100" source="14972" target="14842" cy:directed="1"/>
      <edge id="19257" label="1001011100 (1) 1011011100" source="14972" target="14944" cy:directed="1"/>
      <edge id="19256" label="1001011100 (1) 0001011100" source="14972" target="14975" cy:directed="1"/>
      <edge id="19255" label="0101011001 (1) 0101011000" source="14971" target="15221" cy:directed="1"/>
      <edge id="19254" label="0101011001 (1) 0101011011" source="14971" target="14508" cy:directed="1"/>
      <edge id="19253" label="0101011001 (1) 0101011101" source="14971" target="14596" cy:directed="1"/>
      <edge id="19252" label="0101011001 (1) 0101001001" source="14971" target="15153" cy:directed="1"/>
      <edge id="19251" label="0101011001 (1) 0101111001" source="14971" target="14821" cy:directed="1"/>
      <edge id="19250" label="0101011001 (1) 0001011001" source="14971" target="14977" cy:directed="1"/>
      <edge id="19249" label="0101011001 (1) 1101011001" source="14971" target="14968" cy:directed="1"/>
      <edge id="19248" label="0101011010 (1) 0101011011" source="14970" target="14508" cy:directed="1"/>
      <edge id="19247" label="0101011010 (1) 0101011110" source="14970" target="14595" cy:directed="1"/>
      <edge id="19246" label="0101011010 (1) 0101010010" source="14970" target="15222" cy:directed="1"/>
      <edge id="19245" label="0101011010 (1) 0101001010" source="14970" target="15152" cy:directed="1"/>
      <edge id="19244" label="0101011010 (1) 0101111010" source="14970" target="14552" cy:directed="1"/>
      <edge id="19243" label="0101011010 (1) 0001011010" source="14970" target="14976" cy:directed="1"/>
      <edge id="19242" label="0101011010 (1) 1101011010" source="14970" target="14967" cy:directed="1"/>
      <edge id="19241" label="0101011100 (1) 0101011101" source="14969" target="14596" cy:directed="1"/>
      <edge id="19240" label="0101011100 (1) 0101011110" source="14969" target="14595" cy:directed="1"/>
      <edge id="19239" label="0101011100 (1) 0101001100" source="14969" target="14824" cy:directed="1"/>
      <edge id="19238" label="0101011100 (1) 0101111100" source="14969" target="14820" cy:directed="1"/>
      <edge id="19237" label="0101011100 (1) 0001011100" source="14969" target="14975" cy:directed="1"/>
      <edge id="19236" label="0101011100 (1) 1101011100" source="14969" target="14966" cy:directed="1"/>
      <edge id="19235" label="1101011001 (1) 1101011000" source="14968" target="15218" cy:directed="1"/>
      <edge id="19234" label="1101011001 (1) 1101011011" source="14968" target="14509" cy:directed="1"/>
      <edge id="19233" label="1101011001 (1) 1101011101" source="14968" target="14594" cy:directed="1"/>
      <edge id="19232" label="1101011001 (1) 1101001001" source="14968" target="15150" cy:directed="1"/>
      <edge id="19231" label="1101011001 (1) 1101111001" source="14968" target="14823" cy:directed="1"/>
      <edge id="19230" label="1101011001 (1) 1001011001" source="14968" target="14974" cy:directed="1"/>
      <edge id="19229" label="1101011001 (1) 0101011001" source="14968" target="14971" cy:directed="1"/>
      <edge id="19228" label="1101011010 (1) 1101011011" source="14967" target="14509" cy:directed="1"/>
      <edge id="19227" label="1101011010 (1) 1101011110" source="14967" target="14593" cy:directed="1"/>
      <edge id="19226" label="1101011010 (1) 1101010010" source="14967" target="15219" cy:directed="1"/>
      <edge id="19225" label="1101011010 (1) 1101001010" source="14967" target="15149" cy:directed="1"/>
      <edge id="19224" label="1101011010 (1) 1101111010" source="14967" target="14555" cy:directed="1"/>
      <edge id="19223" label="1101011010 (1) 1001011010" source="14967" target="14973" cy:directed="1"/>
      <edge id="19222" label="1101011010 (1) 0101011010" source="14967" target="14970" cy:directed="1"/>
      <edge id="19221" label="1101011100 (1) 1101011101" source="14966" target="14594" cy:directed="1"/>
      <edge id="19220" label="1101011100 (1) 1101011110" source="14966" target="14593" cy:directed="1"/>
      <edge id="19219" label="1101011100 (1) 1101001100" source="14966" target="14828" cy:directed="1"/>
      <edge id="19218" label="1101011100 (1) 1101111100" source="14966" target="14822" cy:directed="1"/>
      <edge id="19217" label="1101011100 (1) 1001011100" source="14966" target="14972" cy:directed="1"/>
      <edge id="19216" label="1101011100 (1) 0101011100" source="14966" target="14969" cy:directed="1"/>
      <edge id="19215" label="0001000011 (1) 0001000010" source="14965" target="15330" cy:directed="1"/>
      <edge id="19214" label="0001000011 (1) 0001000111" source="14965" target="14587" cy:directed="1"/>
      <edge id="19213" label="0001000011 (1) 1001000011" source="14965" target="14964" cy:directed="1"/>
      <edge id="19212" label="1001000011 (1) 1001000010" source="14964" target="15332" cy:directed="1"/>
      <edge id="19211" label="1001000011 (1) 1001000111" source="14964" target="14585" cy:directed="1"/>
      <edge id="19210" label="1001000011 (1) 1101000011" source="14964" target="14961" cy:directed="1"/>
      <edge id="19209" label="1001000011 (1) 0001000011" source="14964" target="14965" cy:directed="1"/>
      <edge id="19208" label="0001100101 (1) 0001100100" source="14963" target="15061" cy:directed="1"/>
      <edge id="19207" label="0001100101 (1) 0001110101" source="14963" target="14738" cy:directed="1"/>
      <edge id="19206" label="0001100101 (1) 0011100101" source="14963" target="14911" cy:directed="1"/>
      <edge id="19205" label="0001100101 (1) 1001100101" source="14963" target="14959" cy:directed="1"/>
      <edge id="19204" label="0001110100 (1) 0001110101" source="14962" target="14738" cy:directed="1"/>
      <edge id="19203" label="0001110100 (1) 0001110000" source="14962" target="15282" cy:directed="1"/>
      <edge id="19202" label="0001110100 (1) 0001111100" source="14962" target="14833" cy:directed="1"/>
      <edge id="19201" label="0001110100 (1) 0011110100" source="14962" target="14910" cy:directed="1"/>
      <edge id="19200" label="0001110100 (1) 1001110100" source="14962" target="14958" cy:directed="1"/>
      <edge id="19199" label="1101000011 (1) 1101000010" source="14961" target="15328" cy:directed="1"/>
      <edge id="19198" label="1101000011 (1) 1101000111" source="14961" target="14581" cy:directed="1"/>
      <edge id="19197" label="1101000011 (1) 1101100011" source="14961" target="14786" cy:directed="1"/>
      <edge id="19196" label="1101000011 (1) 0101000011" source="14961" target="14957" cy:directed="1"/>
      <edge id="19195" label="1101100010 (1) 1101100011" source="14960" target="14786" cy:directed="1"/>
      <edge id="19194" label="1101100010 (1) 1101100000" source="14960" target="15327" cy:directed="1"/>
      <edge id="19193" label="1101100010 (1) 1101110010" source="14960" target="14785" cy:directed="1"/>
      <edge id="19192" label="1101100010 (1) 0101100010" source="14960" target="14956" cy:directed="1"/>
      <edge id="19191" label="1001100101 (1) 1001100100" source="14959" target="15057" cy:directed="1"/>
      <edge id="19190" label="1001100101 (1) 1001110101" source="14959" target="14737" cy:directed="1"/>
      <edge id="19189" label="1001100101 (1) 1011100101" source="14959" target="14909" cy:directed="1"/>
      <edge id="19188" label="1001100101 (1) 1101100101" source="14959" target="14939" cy:directed="1"/>
      <edge id="19187" label="1001100101 (1) 0001100101" source="14959" target="14963" cy:directed="1"/>
      <edge id="19186" label="1001110100 (1) 1001110101" source="14958" target="14737" cy:directed="1"/>
      <edge id="19185" label="1001110100 (1) 1001110000" source="14958" target="15279" cy:directed="1"/>
      <edge id="19184" label="1001110100 (1) 1001111100" source="14958" target="14831" cy:directed="1"/>
      <edge id="19183" label="1001110100 (1) 1011110100" source="14958" target="14908" cy:directed="1"/>
      <edge id="19182" label="1001110100 (1) 0001110100" source="14958" target="14962" cy:directed="1"/>
      <edge id="19181" label="0101000011 (1) 0101000010" source="14957" target="15325" cy:directed="1"/>
      <edge id="19180" label="0101000011 (1) 0101000111" source="14957" target="14577" cy:directed="1"/>
      <edge id="19179" label="0101000011 (1) 0101100011" source="14957" target="14788" cy:directed="1"/>
      <edge id="19178" label="0101000011 (1) 0001000011" source="14957" target="14965" cy:directed="1"/>
      <edge id="19177" label="0101000011 (1) 1101000011" source="14957" target="14961" cy:directed="1"/>
      <edge id="19176" label="0101100010 (1) 0101100011" source="14956" target="14788" cy:directed="1"/>
      <edge id="19175" label="0101100010 (1) 0101100000" source="14956" target="15324" cy:directed="1"/>
      <edge id="19174" label="0101100010 (1) 0101110010" source="14956" target="14787" cy:directed="1"/>
      <edge id="19173" label="0101100010 (1) 0001100010" source="14956" target="14886" cy:directed="1"/>
      <edge id="19172" label="0101100010 (1) 1101100010" source="14956" target="14960" cy:directed="1"/>
      <edge id="19171" label="0000010100 (1) 0000010101" source="14955" target="14954" cy:directed="1"/>
      <edge id="19170" label="0000010100 (1) 0000010110" source="14955" target="14953" cy:directed="1"/>
      <edge id="19169" label="0000010100 (1) 0000010000" source="14955" target="15272" cy:directed="1"/>
      <edge id="19168" label="0000010100 (1) 0000011100" source="14955" target="15043" cy:directed="1"/>
      <edge id="19167" label="0000010100 (1) 0000000100" source="14955" target="15147" cy:directed="1"/>
      <edge id="19166" label="0000010100 (1) 0000110100" source="14955" target="15010" cy:directed="1"/>
      <edge id="19165" label="0000010100 (1) 0001010100" source="14955" target="14952" cy:directed="1"/>
      <edge id="19164" label="0000010100 (1) 0010010100" source="14955" target="14951" cy:directed="1"/>
      <edge id="19163" label="0000010100 (1) 1000010100" source="14955" target="14950" cy:directed="1"/>
      <edge id="19162" label="0000010101 (1) 0000010100" source="14954" target="14955" cy:directed="1"/>
      <edge id="19161" label="0000010101 (1) 0000010111" source="14954" target="14502" cy:directed="1"/>
      <edge id="19160" label="0000010101 (1) 0000011101" source="14954" target="14679" cy:directed="1"/>
      <edge id="19159" label="0000010101 (1) 0000000101" source="14954" target="15146" cy:directed="1"/>
      <edge id="19158" label="0000010101 (1) 0000110101" source="14954" target="14790" cy:directed="1"/>
      <edge id="19157" label="0000010101 (1) 0001010101" source="14954" target="14862" cy:directed="1"/>
      <edge id="19156" label="0000010101 (1) 0010010101" source="14954" target="14901" cy:directed="1"/>
      <edge id="19155" label="0000010101 (1) 1000010101" source="14954" target="14943" cy:directed="1"/>
      <edge id="19154" label="0000010110 (1) 0000010111" source="14953" target="14502" cy:directed="1"/>
      <edge id="19153" label="0000010110 (1) 0000010010" source="14953" target="15270" cy:directed="1"/>
      <edge id="19152" label="0000010110 (1) 0000000110" source="14953" target="15145" cy:directed="1"/>
      <edge id="19151" label="0000010110 (1) 0000110110" source="14953" target="14542" cy:directed="1"/>
      <edge id="19150" label="0000010110 (1) 0001010110" source="14953" target="14861" cy:directed="1"/>
      <edge id="19149" label="0000010110 (1) 0010010110" source="14953" target="14900" cy:directed="1"/>
      <edge id="19148" label="0000010110 (1) 1000010110" source="14953" target="14942" cy:directed="1"/>
      <edge id="19147" label="0001010100 (1) 0001010101" source="14952" target="14862" cy:directed="1"/>
      <edge id="19146" label="0001010100 (1) 0001010110" source="14952" target="14861" cy:directed="1"/>
      <edge id="19145" label="0001010100 (1) 0001010000" source="14952" target="15268" cy:directed="1"/>
      <edge id="19144" label="0001010100 (1) 0001011100" source="14952" target="14975" cy:directed="1"/>
      <edge id="19143" label="0001010100 (1) 0001000100" source="14952" target="15143" cy:directed="1"/>
      <edge id="19142" label="0001010100 (1) 0001110100" source="14952" target="14962" cy:directed="1"/>
      <edge id="19141" label="0001010100 (1) 0011010100" source="14952" target="14860" cy:directed="1"/>
      <edge id="19140" label="0001010100 (1) 1001010100" source="14952" target="14941" cy:directed="1"/>
      <edge id="19139" label="0010010100 (1) 0010010101" source="14951" target="14901" cy:directed="1"/>
      <edge id="19138" label="0010010100 (1) 0010010110" source="14951" target="14900" cy:directed="1"/>
      <edge id="19137" label="0010010100 (1) 0010010000" source="14951" target="15245" cy:directed="1"/>
      <edge id="19136" label="0010010100 (1) 0010011100" source="14951" target="15005" cy:directed="1"/>
      <edge id="19135" label="0010010100 (1) 0010000100" source="14951" target="15142" cy:directed="1"/>
      <edge id="19134" label="0010010100 (1) 0010110100" source="14951" target="14986" cy:directed="1"/>
      <edge id="19133" label="0010010100 (1) 1010010100" source="14951" target="14940" cy:directed="1"/>
      <edge id="19132" label="1000010100 (1) 1000010101" source="14950" target="14943" cy:directed="1"/>
      <edge id="19131" label="1000010100 (1) 1000010110" source="14950" target="14942" cy:directed="1"/>
      <edge id="19130" label="1000010100 (1) 1000010000" source="14950" target="15277" cy:directed="1"/>
      <edge id="19129" label="1000010100 (1) 1000011100" source="14950" target="15040" cy:directed="1"/>
      <edge id="19128" label="1000010100 (1) 1000000100" source="14950" target="15141" cy:directed="1"/>
      <edge id="19127" label="1000010100 (1) 1000110100" source="14950" target="15014" cy:directed="1"/>
      <edge id="19126" label="1000010100 (1) 1001010100" source="14950" target="14941" cy:directed="1"/>
      <edge id="19125" label="1000010100 (1) 1010010100" source="14950" target="14940" cy:directed="1"/>
      <edge id="19124" label="1000010100 (1) 0000010100" source="14950" target="14955" cy:directed="1"/>
      <edge id="19123" label="0011011001 (1) 0011011000" source="14949" target="15198" cy:directed="1"/>
      <edge id="19122" label="0011011001 (1) 0011011011" source="14949" target="14499" cy:directed="1"/>
      <edge id="19121" label="0011011001 (1) 0011011101" source="14949" target="14583" cy:directed="1"/>
      <edge id="19120" label="0011011001 (1) 0011001001" source="14949" target="15133" cy:directed="1"/>
      <edge id="19119" label="0011011001 (1) 0010011001" source="14949" target="15007" cy:directed="1"/>
      <edge id="19118" label="0011011001 (1) 0001011001" source="14949" target="14977" cy:directed="1"/>
      <edge id="19117" label="0011011001 (1) 1011011001" source="14949" target="14946" cy:directed="1"/>
      <edge id="19116" label="0011011010 (1) 0011011011" source="14948" target="14499" cy:directed="1"/>
      <edge id="19115" label="0011011010 (1) 0011011110" source="14948" target="14582" cy:directed="1"/>
      <edge id="19114" label="0011011010 (1) 0011010010" source="14948" target="15199" cy:directed="1"/>
      <edge id="19113" label="0011011010 (1) 0011001010" source="14948" target="15132" cy:directed="1"/>
      <edge id="19112" label="0011011010 (1) 0010011010" source="14948" target="15006" cy:directed="1"/>
      <edge id="19111" label="0011011010 (1) 0001011010" source="14948" target="14976" cy:directed="1"/>
      <edge id="19110" label="0011011010 (1) 1011011010" source="14948" target="14945" cy:directed="1"/>
      <edge id="19109" label="0011011100 (1) 0011011101" source="14947" target="14583" cy:directed="1"/>
      <edge id="19108" label="0011011100 (1) 0011011110" source="14947" target="14582" cy:directed="1"/>
      <edge id="19107" label="0011011100 (1) 0011001100" source="14947" target="14760" cy:directed="1"/>
      <edge id="19106" label="0011011100 (1) 0010011100" source="14947" target="15005" cy:directed="1"/>
      <edge id="19105" label="0011011100 (1) 1011011100" source="14947" target="14944" cy:directed="1"/>
      <edge id="19104" label="1011011001 (1) 1011011000" source="14946" target="15194" cy:directed="1"/>
      <edge id="19103" label="1011011001 (1) 1011011011" source="14946" target="14498" cy:directed="1"/>
      <edge id="19102" label="1011011001 (1) 1011011101" source="14946" target="14579" cy:directed="1"/>
      <edge id="19101" label="1011011001 (1) 1011001001" source="14946" target="15130" cy:directed="1"/>
      <edge id="19100" label="1011011001 (1) 1010011001" source="14946" target="15004" cy:directed="1"/>
      <edge id="19099" label="1011011001 (1) 1001011001" source="14946" target="14974" cy:directed="1"/>
      <edge id="19098" label="1011011001 (1) 0011011001" source="14946" target="14949" cy:directed="1"/>
      <edge id="19097" label="1011011010 (1) 1011011011" source="14945" target="14498" cy:directed="1"/>
      <edge id="19096" label="1011011010 (1) 1011011110" source="14945" target="14578" cy:directed="1"/>
      <edge id="19095" label="1011011010 (1) 1011010010" source="14945" target="15195" cy:directed="1"/>
      <edge id="19094" label="1011011010 (1) 1011001010" source="14945" target="15129" cy:directed="1"/>
      <edge id="19093" label="1011011010 (1) 1010011010" source="14945" target="15003" cy:directed="1"/>
      <edge id="19092" label="1011011010 (1) 1001011010" source="14945" target="14973" cy:directed="1"/>
      <edge id="19091" label="1011011010 (1) 0011011010" source="14945" target="14948" cy:directed="1"/>
      <edge id="19090" label="1011011100 (1) 1011011101" source="14944" target="14579" cy:directed="1"/>
      <edge id="19089" label="1011011100 (1) 1011011110" source="14944" target="14578" cy:directed="1"/>
      <edge id="19088" label="1011011100 (1) 1011001100" source="14944" target="14754" cy:directed="1"/>
      <edge id="19087" label="1011011100 (1) 1010011100" source="14944" target="15002" cy:directed="1"/>
      <edge id="19086" label="1011011100 (1) 0011011100" source="14944" target="14947" cy:directed="1"/>
      <edge id="19085" label="1000010101 (1) 1000010100" source="14943" target="14950" cy:directed="1"/>
      <edge id="19084" label="1000010101 (1) 1000010111" source="14943" target="14503" cy:directed="1"/>
      <edge id="19083" label="1000010101 (1) 1000011101" source="14943" target="14681" cy:directed="1"/>
      <edge id="19082" label="1000010101 (1) 1000000101" source="14943" target="15140" cy:directed="1"/>
      <edge id="19081" label="1000010101 (1) 1000110101" source="14943" target="14796" cy:directed="1"/>
      <edge id="19080" label="1000010101 (1) 1001010101" source="14943" target="14865" cy:directed="1"/>
      <edge id="19079" label="1000010101 (1) 1010010101" source="14943" target="14903" cy:directed="1"/>
      <edge id="19078" label="1000010101 (1) 0000010101" source="14943" target="14954" cy:directed="1"/>
      <edge id="19077" label="1000010110 (1) 1000010111" source="14942" target="14503" cy:directed="1"/>
      <edge id="19076" label="1000010110 (1) 1000010010" source="14942" target="15275" cy:directed="1"/>
      <edge id="19075" label="1000010110 (1) 1000000110" source="14942" target="15139" cy:directed="1"/>
      <edge id="19074" label="1000010110 (1) 1000110110" source="14942" target="14544" cy:directed="1"/>
      <edge id="19073" label="1000010110 (1) 1001010110" source="14942" target="14864" cy:directed="1"/>
      <edge id="19072" label="1000010110 (1) 1010010110" source="14942" target="14902" cy:directed="1"/>
      <edge id="19071" label="1000010110 (1) 0000010110" source="14942" target="14953" cy:directed="1"/>
      <edge id="19070" label="1001010100 (1) 1001010101" source="14941" target="14865" cy:directed="1"/>
      <edge id="19069" label="1001010100 (1) 1001010110" source="14941" target="14864" cy:directed="1"/>
      <edge id="19068" label="1001010100 (1) 1001010000" source="14941" target="15273" cy:directed="1"/>
      <edge id="19067" label="1001010100 (1) 1001011100" source="14941" target="14972" cy:directed="1"/>
      <edge id="19066" label="1001010100 (1) 1001000100" source="14941" target="15137" cy:directed="1"/>
      <edge id="19065" label="1001010100 (1) 1001110100" source="14941" target="14958" cy:directed="1"/>
      <edge id="19064" label="1001010100 (1) 1011010100" source="14941" target="14863" cy:directed="1"/>
      <edge id="19063" label="1001010100 (1) 0001010100" source="14941" target="14952" cy:directed="1"/>
      <edge id="19062" label="1010010100 (1) 1010010101" source="14940" target="14903" cy:directed="1"/>
      <edge id="19061" label="1010010100 (1) 1010010110" source="14940" target="14902" cy:directed="1"/>
      <edge id="19060" label="1010010100 (1) 1010010000" source="14940" target="15249" cy:directed="1"/>
      <edge id="19059" label="1010010100 (1) 1010011100" source="14940" target="15002" cy:directed="1"/>
      <edge id="19058" label="1010010100 (1) 1010000100" source="14940" target="15136" cy:directed="1"/>
      <edge id="19057" label="1010010100 (1) 1010110100" source="14940" target="14983" cy:directed="1"/>
      <edge id="19056" label="1010010100 (1) 0010010100" source="14940" target="14951" cy:directed="1"/>
      <edge id="19055" label="1101100101 (1) 1101100100" source="14939" target="15053" cy:directed="1"/>
      <edge id="19054" label="1101100101 (1) 1101110101" source="14939" target="14726" cy:directed="1"/>
      <edge id="19053" label="1101100101 (1) 0101100101" source="14939" target="14937" cy:directed="1"/>
      <edge id="19052" label="1101110100 (1) 1101110101" source="14938" target="14726" cy:directed="1"/>
      <edge id="19051" label="1101110100 (1) 1101110000" source="14938" target="15266" cy:directed="1"/>
      <edge id="19050" label="1101110100 (1) 1101111100" source="14938" target="14822" cy:directed="1"/>
      <edge id="19049" label="1101110100 (1) 1001110100" source="14938" target="14958" cy:directed="1"/>
      <edge id="19048" label="1101110100 (1) 0101110100" source="14938" target="14936" cy:directed="1"/>
      <edge id="19047" label="0101100101 (1) 0101100100" source="14937" target="15050" cy:directed="1"/>
      <edge id="19046" label="0101100101 (1) 0101110101" source="14937" target="14727" cy:directed="1"/>
      <edge id="19045" label="0101100101 (1) 0001100101" source="14937" target="14963" cy:directed="1"/>
      <edge id="19044" label="0101100101 (1) 1101100101" source="14937" target="14939" cy:directed="1"/>
      <edge id="19043" label="0101110100 (1) 0101110101" source="14936" target="14727" cy:directed="1"/>
      <edge id="19042" label="0101110100 (1) 0101110000" source="14936" target="15264" cy:directed="1"/>
      <edge id="19041" label="0101110100 (1) 0101111100" source="14936" target="14820" cy:directed="1"/>
      <edge id="19040" label="0101110100 (1) 0001110100" source="14936" target="14962" cy:directed="1"/>
      <edge id="19039" label="0101110100 (1) 1101110100" source="14936" target="14938" cy:directed="1"/>
      <edge id="19038" label="0100010100 (1) 0100010101" source="14935" target="14934" cy:directed="1"/>
      <edge id="19037" label="0100010100 (1) 0100010110" source="14935" target="14933" cy:directed="1"/>
      <edge id="19036" label="0100010100 (1) 0100010000" source="14935" target="15258" cy:directed="1"/>
      <edge id="19035" label="0100010100 (1) 0100011100" source="14935" target="15028" cy:directed="1"/>
      <edge id="19034" label="0100010100 (1) 0100000100" source="14935" target="15119" cy:directed="1"/>
      <edge id="19033" label="0100010100 (1) 0100110100" source="14935" target="15000" cy:directed="1"/>
      <edge id="19032" label="0100010100 (1) 0101010100" source="14935" target="14932" cy:directed="1"/>
      <edge id="19031" label="0100010100 (1) 0000010100" source="14935" target="14955" cy:directed="1"/>
      <edge id="19030" label="0100010100 (1) 1100010100" source="14935" target="14931" cy:directed="1"/>
      <edge id="19029" label="0100010101 (1) 0100010100" source="14934" target="14935" cy:directed="1"/>
      <edge id="19028" label="0100010101 (1) 0100010111" source="14934" target="14493" cy:directed="1"/>
      <edge id="19027" label="0100010101 (1) 0100011101" source="14934" target="14669" cy:directed="1"/>
      <edge id="19026" label="0100010101 (1) 0100000101" source="14934" target="15118" cy:directed="1"/>
      <edge id="19025" label="0100010101 (1) 0100110101" source="14934" target="14779" cy:directed="1"/>
      <edge id="19024" label="0100010101 (1) 0101010101" source="14934" target="14854" cy:directed="1"/>
      <edge id="19023" label="0100010101 (1) 0000010101" source="14934" target="14954" cy:directed="1"/>
      <edge id="19022" label="0100010101 (1) 1100010101" source="14934" target="14930" cy:directed="1"/>
      <edge id="19021" label="0100010110 (1) 0100010111" source="14933" target="14493" cy:directed="1"/>
      <edge id="19020" label="0100010110 (1) 0100010010" source="14933" target="15256" cy:directed="1"/>
      <edge id="19019" label="0100010110 (1) 0100000110" source="14933" target="15117" cy:directed="1"/>
      <edge id="19018" label="0100010110 (1) 0100110110" source="14933" target="14532" cy:directed="1"/>
      <edge id="19017" label="0100010110 (1) 0101010110" source="14933" target="14853" cy:directed="1"/>
      <edge id="19016" label="0100010110 (1) 0000010110" source="14933" target="14953" cy:directed="1"/>
      <edge id="19015" label="0100010110 (1) 1100010110" source="14933" target="14929" cy:directed="1"/>
      <edge id="19014" label="0101010100 (1) 0101010101" source="14932" target="14854" cy:directed="1"/>
      <edge id="19013" label="0101010100 (1) 0101010110" source="14932" target="14853" cy:directed="1"/>
      <edge id="19012" label="0101010100 (1) 0101010000" source="14932" target="15254" cy:directed="1"/>
      <edge id="19011" label="0101010100 (1) 0101011100" source="14932" target="14969" cy:directed="1"/>
      <edge id="19010" label="0101010100 (1) 0101000100" source="14932" target="15115" cy:directed="1"/>
      <edge id="19009" label="0101010100 (1) 0101110100" source="14932" target="14936" cy:directed="1"/>
      <edge id="19008" label="0101010100 (1) 0001010100" source="14932" target="14952" cy:directed="1"/>
      <edge id="19007" label="0101010100 (1) 1101010100" source="14932" target="14928" cy:directed="1"/>
      <edge id="19006" label="1100010100 (1) 1100010101" source="14931" target="14930" cy:directed="1"/>
      <edge id="19005" label="1100010100 (1) 1100010110" source="14931" target="14929" cy:directed="1"/>
      <edge id="19004" label="1100010100 (1) 1100010000" source="14931" target="15263" cy:directed="1"/>
      <edge id="19003" label="1100010100 (1) 1100011100" source="14931" target="15025" cy:directed="1"/>
      <edge id="19002" label="1100010100 (1) 1100000100" source="14931" target="15135" cy:directed="1"/>
      <edge id="19001" label="1100010100 (1) 1100110100" source="14931" target="14995" cy:directed="1"/>
      <edge id="19000" label="1100010100 (1) 1101010100" source="14931" target="14928" cy:directed="1"/>
      <edge id="18999" label="1100010100 (1) 1000010100" source="14931" target="14950" cy:directed="1"/>
      <edge id="18998" label="1100010100 (1) 0100010100" source="14931" target="14935" cy:directed="1"/>
      <edge id="18997" label="1100010101 (1) 1100010100" source="14930" target="14931" cy:directed="1"/>
      <edge id="18996" label="1100010101 (1) 1100010111" source="14930" target="14492" cy:directed="1"/>
      <edge id="18995" label="1100010101 (1) 1100011101" source="14930" target="14667" cy:directed="1"/>
      <edge id="18994" label="1100010101 (1) 1100000101" source="14930" target="15123" cy:directed="1"/>
      <edge id="18993" label="1100010101 (1) 1100110101" source="14930" target="14778" cy:directed="1"/>
      <edge id="18992" label="1100010101 (1) 1101010101" source="14930" target="14852" cy:directed="1"/>
      <edge id="18991" label="1100010101 (1) 1000010101" source="14930" target="14943" cy:directed="1"/>
      <edge id="18990" label="1100010101 (1) 0100010101" source="14930" target="14934" cy:directed="1"/>
      <edge id="18989" label="1100010110 (1) 1100010111" source="14929" target="14492" cy:directed="1"/>
      <edge id="18988" label="1100010110 (1) 1100010010" source="14929" target="15261" cy:directed="1"/>
      <edge id="18987" label="1100010110 (1) 1100000110" source="14929" target="15122" cy:directed="1"/>
      <edge id="18986" label="1100010110 (1) 1100110110" source="14929" target="14529" cy:directed="1"/>
      <edge id="18985" label="1100010110 (1) 1101010110" source="14929" target="14851" cy:directed="1"/>
      <edge id="18984" label="1100010110 (1) 1000010110" source="14929" target="14942" cy:directed="1"/>
      <edge id="18983" label="1100010110 (1) 0100010110" source="14929" target="14933" cy:directed="1"/>
      <edge id="18982" label="1101010100 (1) 1101010101" source="14928" target="14852" cy:directed="1"/>
      <edge id="18981" label="1101010100 (1) 1101010110" source="14928" target="14851" cy:directed="1"/>
      <edge id="18980" label="1101010100 (1) 1101010000" source="14928" target="15259" cy:directed="1"/>
      <edge id="18979" label="1101010100 (1) 1101011100" source="14928" target="14966" cy:directed="1"/>
      <edge id="18978" label="1101010100 (1) 1101000100" source="14928" target="15120" cy:directed="1"/>
      <edge id="18977" label="1101010100 (1) 1101110100" source="14928" target="14938" cy:directed="1"/>
      <edge id="18976" label="1101010100 (1) 1001010100" source="14928" target="14941" cy:directed="1"/>
      <edge id="18975" label="1101010100 (1) 0101010100" source="14928" target="14932" cy:directed="1"/>
      <edge id="18974" label="1111011001 (1) 1111011000" source="14927" target="15186" cy:directed="1"/>
      <edge id="18973" label="1111011001 (1) 1111011011" source="14927" target="14488" cy:directed="1"/>
      <edge id="18972" label="1111011001 (1) 1111011101" source="14927" target="14573" cy:directed="1"/>
      <edge id="18971" label="1111011001 (1) 1111001001" source="14927" target="15114" cy:directed="1"/>
      <edge id="18970" label="1111011001 (1) 1111111001" source="14927" target="14775" cy:directed="1"/>
      <edge id="18969" label="1111011001 (1) 1110011001" source="14927" target="14999" cy:directed="1"/>
      <edge id="18968" label="1111011001 (1) 1101011001" source="14927" target="14968" cy:directed="1"/>
      <edge id="18967" label="1111011001 (1) 1011011001" source="14927" target="14946" cy:directed="1"/>
      <edge id="18966" label="1111011001 (1) 0111011001" source="14927" target="14924" cy:directed="1"/>
      <edge id="18965" label="1111011010 (1) 1111011011" source="14926" target="14488" cy:directed="1"/>
      <edge id="18964" label="1111011010 (1) 1111011110" source="14926" target="14572" cy:directed="1"/>
      <edge id="18963" label="1111011010 (1) 1111010010" source="14926" target="15187" cy:directed="1"/>
      <edge id="18962" label="1111011010 (1) 1111001010" source="14926" target="15113" cy:directed="1"/>
      <edge id="18961" label="1111011010 (1) 1111111010" source="14926" target="14526" cy:directed="1"/>
      <edge id="18960" label="1111011010 (1) 1110011010" source="14926" target="14998" cy:directed="1"/>
      <edge id="18959" label="1111011010 (1) 1101011010" source="14926" target="14967" cy:directed="1"/>
      <edge id="18958" label="1111011010 (1) 1011011010" source="14926" target="14945" cy:directed="1"/>
      <edge id="18957" label="1111011010 (1) 0111011010" source="14926" target="14923" cy:directed="1"/>
      <edge id="18956" label="1111011100 (1) 1111011101" source="14925" target="14573" cy:directed="1"/>
      <edge id="18955" label="1111011100 (1) 1111011110" source="14925" target="14572" cy:directed="1"/>
      <edge id="18954" label="1111011100 (1) 1111001100" source="14925" target="14741" cy:directed="1"/>
      <edge id="18953" label="1111011100 (1) 1111111100" source="14925" target="14774" cy:directed="1"/>
      <edge id="18952" label="1111011100 (1) 1110011100" source="14925" target="14997" cy:directed="1"/>
      <edge id="18951" label="1111011100 (1) 1101011100" source="14925" target="14966" cy:directed="1"/>
      <edge id="18950" label="1111011100 (1) 1011011100" source="14925" target="14944" cy:directed="1"/>
      <edge id="18949" label="1111011100 (1) 0111011100" source="14925" target="14922" cy:directed="1"/>
      <edge id="18948" label="0111011001 (1) 0111011000" source="14924" target="15190" cy:directed="1"/>
      <edge id="18947" label="0111011001 (1) 0111011011" source="14924" target="14489" cy:directed="1"/>
      <edge id="18946" label="0111011001 (1) 0111011101" source="14924" target="14575" cy:directed="1"/>
      <edge id="18945" label="0111011001 (1) 0111001001" source="14924" target="15110" cy:directed="1"/>
      <edge id="18944" label="0111011001 (1) 0111111001" source="14924" target="14777" cy:directed="1"/>
      <edge id="18943" label="0111011001 (1) 0110011001" source="14924" target="14994" cy:directed="1"/>
      <edge id="18942" label="0111011001 (1) 0101011001" source="14924" target="14971" cy:directed="1"/>
      <edge id="18941" label="0111011001 (1) 0011011001" source="14924" target="14949" cy:directed="1"/>
      <edge id="18940" label="0111011001 (1) 1111011001" source="14924" target="14927" cy:directed="1"/>
      <edge id="18939" label="0111011010 (1) 0111011011" source="14923" target="14489" cy:directed="1"/>
      <edge id="18938" label="0111011010 (1) 0111011110" source="14923" target="14574" cy:directed="1"/>
      <edge id="18937" label="0111011010 (1) 0111010010" source="14923" target="15191" cy:directed="1"/>
      <edge id="18936" label="0111011010 (1) 0111001010" source="14923" target="15109" cy:directed="1"/>
      <edge id="18935" label="0111011010 (1) 0111111010" source="14923" target="14524" cy:directed="1"/>
      <edge id="18934" label="0111011010 (1) 0110011010" source="14923" target="14993" cy:directed="1"/>
      <edge id="18933" label="0111011010 (1) 0101011010" source="14923" target="14970" cy:directed="1"/>
      <edge id="18932" label="0111011010 (1) 0011011010" source="14923" target="14948" cy:directed="1"/>
      <edge id="18931" label="0111011010 (1) 1111011010" source="14923" target="14926" cy:directed="1"/>
      <edge id="18930" label="0111011100 (1) 0111011101" source="14922" target="14575" cy:directed="1"/>
      <edge id="18929" label="0111011100 (1) 0111011110" source="14922" target="14574" cy:directed="1"/>
      <edge id="18928" label="0111011100 (1) 0111001100" source="14922" target="14731" cy:directed="1"/>
      <edge id="18927" label="0111011100 (1) 0111111100" source="14922" target="14776" cy:directed="1"/>
      <edge id="18926" label="0111011100 (1) 0110011100" source="14922" target="14992" cy:directed="1"/>
      <edge id="18925" label="0111011100 (1) 0101011100" source="14922" target="14969" cy:directed="1"/>
      <edge id="18924" label="0111011100 (1) 0011011100" source="14922" target="14947" cy:directed="1"/>
      <edge id="18923" label="0111011100 (1) 1111011100" source="14922" target="14925" cy:directed="1"/>
      <edge id="18922" label="0011000011 (1) 0011000010" source="14921" target="15321" cy:directed="1"/>
      <edge id="18921" label="0011000011 (1) 0011000111" source="14921" target="14559" cy:directed="1"/>
      <edge id="18920" label="0011000011 (1) 0010000011" source="14921" target="14989" cy:directed="1"/>
      <edge id="18919" label="0011000011 (1) 0001000011" source="14921" target="14965" cy:directed="1"/>
      <edge id="18918" label="0011000011 (1) 1011000011" source="14921" target="14918" cy:directed="1"/>
      <edge id="18917" label="1000111001 (1) 1000111000" source="14920" target="15177" cy:directed="1"/>
      <edge id="18916" label="1000111001 (1) 1000111101" source="14920" target="14561" cy:directed="1"/>
      <edge id="18915" label="1000111001 (1) 1000011001" source="14920" target="15042" cy:directed="1"/>
      <edge id="18914" label="1000111001 (1) 1001111001" source="14920" target="14832" cy:directed="1"/>
      <edge id="18913" label="1000111001 (1) 1010111001" source="14920" target="14876" cy:directed="1"/>
      <edge id="18912" label="1000111001 (1) 0000111001" source="14920" target="14917" cy:directed="1"/>
      <edge id="18911" label="1000111100 (1) 1000111101" source="14919" target="14561" cy:directed="1"/>
      <edge id="18910" label="1000111100 (1) 1000011100" source="14919" target="15040" cy:directed="1"/>
      <edge id="18909" label="1000111100 (1) 1001111100" source="14919" target="14831" cy:directed="1"/>
      <edge id="18908" label="1000111100 (1) 1010111100" source="14919" target="14875" cy:directed="1"/>
      <edge id="18907" label="1000111100 (1) 0000111100" source="14919" target="14916" cy:directed="1"/>
      <edge id="18906" label="1011000011 (1) 1011000010" source="14918" target="15318" cy:directed="1"/>
      <edge id="18905" label="1011000011 (1) 1011000111" source="14918" target="14563" cy:directed="1"/>
      <edge id="18904" label="1011000011 (1) 1010000011" source="14918" target="14988" cy:directed="1"/>
      <edge id="18903" label="1011000011 (1) 1001000011" source="14918" target="14964" cy:directed="1"/>
      <edge id="18902" label="1011000011 (1) 1111000011" source="14918" target="14915" cy:directed="1"/>
      <edge id="18901" label="1011000011 (1) 0011000011" source="14918" target="14921" cy:directed="1"/>
      <edge id="18900" label="0000111001 (1) 0000111000" source="14917" target="15175" cy:directed="1"/>
      <edge id="18899" label="0000111001 (1) 0000111101" source="14917" target="14560" cy:directed="1"/>
      <edge id="18898" label="0000111001 (1) 0000011001" source="14917" target="15045" cy:directed="1"/>
      <edge id="18897" label="0000111001 (1) 0001111001" source="14917" target="14834" cy:directed="1"/>
      <edge id="18896" label="0000111001 (1) 0010111001" source="14917" target="14878" cy:directed="1"/>
      <edge id="18895" label="0000111001 (1) 1000111001" source="14917" target="14920" cy:directed="1"/>
      <edge id="18894" label="0000111100 (1) 0000111101" source="14916" target="14560" cy:directed="1"/>
      <edge id="18893" label="0000111100 (1) 0000011100" source="14916" target="15043" cy:directed="1"/>
      <edge id="18892" label="0000111100 (1) 0001111100" source="14916" target="14833" cy:directed="1"/>
      <edge id="18891" label="0000111100 (1) 0010111100" source="14916" target="14877" cy:directed="1"/>
      <edge id="18890" label="0000111100 (1) 1000111100" source="14916" target="14919" cy:directed="1"/>
      <edge id="18889" label="1111000011 (1) 1111000010" source="14915" target="15315" cy:directed="1"/>
      <edge id="18888" label="1111000011 (1) 1111000111" source="14915" target="14549" cy:directed="1"/>
      <edge id="18887" label="1111000011 (1) 1111100011" source="14915" target="14765" cy:directed="1"/>
      <edge id="18886" label="1111000011 (1) 1110000011" source="14915" target="14985" cy:directed="1"/>
      <edge id="18885" label="1111000011 (1) 1101000011" source="14915" target="14961" cy:directed="1"/>
      <edge id="18884" label="1111000011 (1) 0111000011" source="14915" target="14905" cy:directed="1"/>
      <edge id="18883" label="1111100010 (1) 1111100011" source="14914" target="14765" cy:directed="1"/>
      <edge id="18882" label="1111100010 (1) 1111100000" source="14914" target="15314" cy:directed="1"/>
      <edge id="18881" label="1111100010 (1) 1111110010" source="14914" target="14764" cy:directed="1"/>
      <edge id="18880" label="1111100010 (1) 1110100010" source="14914" target="14855" cy:directed="1"/>
      <edge id="18879" label="1111100010 (1) 1101100010" source="14914" target="14960" cy:directed="1"/>
      <edge id="18878" label="1111100010 (1) 0111100010" source="14914" target="14904" cy:directed="1"/>
      <edge id="18877" label="0100111001 (1) 0100111000" source="14913" target="15168" cy:directed="1"/>
      <edge id="18876" label="0100111001 (1) 0100111101" source="14913" target="14551" cy:directed="1"/>
      <edge id="18875" label="0100111001 (1) 0100011001" source="14913" target="15030" cy:directed="1"/>
      <edge id="18874" label="0100111001 (1) 0101111001" source="14913" target="14821" cy:directed="1"/>
      <edge id="18873" label="0100111001 (1) 0000111001" source="14913" target="14917" cy:directed="1"/>
      <edge id="18872" label="0100111001 (1) 1100111001" source="14913" target="14907" cy:directed="1"/>
      <edge id="18871" label="0100111100 (1) 0100111101" source="14912" target="14551" cy:directed="1"/>
      <edge id="18870" label="0100111100 (1) 0100011100" source="14912" target="15028" cy:directed="1"/>
      <edge id="18869" label="0100111100 (1) 0101111100" source="14912" target="14820" cy:directed="1"/>
      <edge id="18868" label="0100111100 (1) 0000111100" source="14912" target="14916" cy:directed="1"/>
      <edge id="18867" label="0100111100 (1) 1100111100" source="14912" target="14906" cy:directed="1"/>
      <edge id="18866" label="0011100101 (1) 0011100100" source="14911" target="15037" cy:directed="1"/>
      <edge id="18865" label="0011100101 (1) 0011110101" source="14911" target="14707" cy:directed="1"/>
      <edge id="18864" label="0011100101 (1) 0010100101" source="14911" target="14987" cy:directed="1"/>
      <edge id="18863" label="0011100101 (1) 1011100101" source="14911" target="14909" cy:directed="1"/>
      <edge id="18862" label="0011110100 (1) 0011110101" source="14910" target="14707" cy:directed="1"/>
      <edge id="18861" label="0011110100 (1) 0011110000" source="14910" target="15252" cy:directed="1"/>
      <edge id="18860" label="0011110100 (1) 0011111100" source="14910" target="14794" cy:directed="1"/>
      <edge id="18859" label="0011110100 (1) 0010110100" source="14910" target="14986" cy:directed="1"/>
      <edge id="18858" label="0011110100 (1) 1011110100" source="14910" target="14908" cy:directed="1"/>
      <edge id="18857" label="1011100101 (1) 1011100100" source="14909" target="15032" cy:directed="1"/>
      <edge id="18856" label="1011100101 (1) 1011110101" source="14909" target="14706" cy:directed="1"/>
      <edge id="18855" label="1011100101 (1) 1010100101" source="14909" target="14984" cy:directed="1"/>
      <edge id="18854" label="1011100101 (1) 1111100101" source="14909" target="14899" cy:directed="1"/>
      <edge id="18853" label="1011100101 (1) 0011100101" source="14909" target="14911" cy:directed="1"/>
      <edge id="18852" label="1011110100 (1) 1011110101" source="14908" target="14706" cy:directed="1"/>
      <edge id="18851" label="1011110100 (1) 1011110000" source="14908" target="15250" cy:directed="1"/>
      <edge id="18850" label="1011110100 (1) 1011111100" source="14908" target="14792" cy:directed="1"/>
      <edge id="18849" label="1011110100 (1) 1010110100" source="14908" target="14983" cy:directed="1"/>
      <edge id="18848" label="1011110100 (1) 0011110100" source="14908" target="14910" cy:directed="1"/>
      <edge id="18847" label="1100111001 (1) 1100111000" source="14907" target="15166" cy:directed="1"/>
      <edge id="18846" label="1100111001 (1) 1100111101" source="14907" target="14550" cy:directed="1"/>
      <edge id="18845" label="1100111001 (1) 1100011001" source="14907" target="15027" cy:directed="1"/>
      <edge id="18844" label="1100111001 (1) 1101111001" source="14907" target="14823" cy:directed="1"/>
      <edge id="18843" label="1100111001 (1) 1000111001" source="14907" target="14920" cy:directed="1"/>
      <edge id="18842" label="1100111001 (1) 0100111001" source="14907" target="14913" cy:directed="1"/>
      <edge id="18841" label="1100111100 (1) 1100111101" source="14906" target="14550" cy:directed="1"/>
      <edge id="18840" label="1100111100 (1) 1100011100" source="14906" target="15025" cy:directed="1"/>
      <edge id="18839" label="1100111100 (1) 1101111100" source="14906" target="14822" cy:directed="1"/>
      <edge id="18838" label="1100111100 (1) 1000111100" source="14906" target="14919" cy:directed="1"/>
      <edge id="18837" label="1100111100 (1) 0100111100" source="14906" target="14912" cy:directed="1"/>
      <edge id="18836" label="0111000011 (1) 0111000010" source="14905" target="15311" cy:directed="1"/>
      <edge id="18835" label="0111000011 (1) 0111000111" source="14905" target="14547" cy:directed="1"/>
      <edge id="18834" label="0111000011 (1) 0111100011" source="14905" target="14758" cy:directed="1"/>
      <edge id="18833" label="0111000011 (1) 0110000011" source="14905" target="14982" cy:directed="1"/>
      <edge id="18832" label="0111000011 (1) 0101000011" source="14905" target="14957" cy:directed="1"/>
      <edge id="18831" label="0111000011 (1) 0011000011" source="14905" target="14921" cy:directed="1"/>
      <edge id="18830" label="0111000011 (1) 1111000011" source="14905" target="14915" cy:directed="1"/>
      <edge id="18829" label="0111100010 (1) 0111100011" source="14904" target="14758" cy:directed="1"/>
      <edge id="18828" label="0111100010 (1) 0111100000" source="14904" target="15310" cy:directed="1"/>
      <edge id="18827" label="0111100010 (1) 0111110010" source="14904" target="14757" cy:directed="1"/>
      <edge id="18826" label="0111100010 (1) 0110100010" source="14904" target="14837" cy:directed="1"/>
      <edge id="18825" label="0111100010 (1) 0101100010" source="14904" target="14956" cy:directed="1"/>
      <edge id="18824" label="0111100010 (1) 0011100010" source="14904" target="14805" cy:directed="1"/>
      <edge id="18823" label="0111100010 (1) 1111100010" source="14904" target="14914" cy:directed="1"/>
      <edge id="18822" label="1010010101 (1) 1010010100" source="14903" target="14940" cy:directed="1"/>
      <edge id="18821" label="1010010101 (1) 1010010111" source="14903" target="14478" cy:directed="1"/>
      <edge id="18820" label="1010010101 (1) 1010011101" source="14903" target="14651" cy:directed="1"/>
      <edge id="18819" label="1010010101 (1) 1010000101" source="14903" target="15094" cy:directed="1"/>
      <edge id="18818" label="1010010101 (1) 1010110101" source="14903" target="14767" cy:directed="1"/>
      <edge id="18817" label="1010010101 (1) 0010010101" source="14903" target="14901" cy:directed="1"/>
      <edge id="18816" label="1010010110 (1) 1010010111" source="14902" target="14478" cy:directed="1"/>
      <edge id="18815" label="1010010110 (1) 1010010010" source="14902" target="15247" cy:directed="1"/>
      <edge id="18814" label="1010010110 (1) 1010000110" source="14902" target="15093" cy:directed="1"/>
      <edge id="18813" label="1010010110 (1) 1010110110" source="14902" target="14518" cy:directed="1"/>
      <edge id="18812" label="1010010110 (1) 0010010110" source="14902" target="14900" cy:directed="1"/>
      <edge id="18811" label="0010010101 (1) 0010010100" source="14901" target="14951" cy:directed="1"/>
      <edge id="18810" label="0010010101 (1) 0010010111" source="14901" target="14479" cy:directed="1"/>
      <edge id="18809" label="0010010101 (1) 0010011101" source="14901" target="14655" cy:directed="1"/>
      <edge id="18808" label="0010010101 (1) 0010000101" source="14901" target="15090" cy:directed="1"/>
      <edge id="18807" label="0010010101 (1) 0010110101" source="14901" target="14766" cy:directed="1"/>
      <edge id="18806" label="0010010101 (1) 1010010101" source="14901" target="14903" cy:directed="1"/>
      <edge id="18805" label="0010010110 (1) 0010010111" source="14900" target="14479" cy:directed="1"/>
      <edge id="18804" label="0010010110 (1) 0010010010" source="14900" target="15243" cy:directed="1"/>
      <edge id="18803" label="0010010110 (1) 0010000110" source="14900" target="15089" cy:directed="1"/>
      <edge id="18802" label="0010010110 (1) 0010110110" source="14900" target="14520" cy:directed="1"/>
      <edge id="18801" label="0010010110 (1) 1010010110" source="14900" target="14902" cy:directed="1"/>
      <edge id="18800" label="1111100101 (1) 1111100100" source="14899" target="15022" cy:directed="1"/>
      <edge id="18799" label="1111100101 (1) 1111110101" source="14899" target="14703" cy:directed="1"/>
      <edge id="18798" label="1111100101 (1) 1110100101" source="14899" target="14981" cy:directed="1"/>
      <edge id="18797" label="1111100101 (1) 1101100101" source="14899" target="14939" cy:directed="1"/>
      <edge id="18796" label="1111100101 (1) 0111100101" source="14899" target="14897" cy:directed="1"/>
      <edge id="18795" label="1111110100 (1) 1111110101" source="14898" target="14703" cy:directed="1"/>
      <edge id="18794" label="1111110100 (1) 1111110000" source="14898" target="15240" cy:directed="1"/>
      <edge id="18793" label="1111110100 (1) 1111111100" source="14898" target="14774" cy:directed="1"/>
      <edge id="18792" label="1111110100 (1) 1110110100" source="14898" target="14980" cy:directed="1"/>
      <edge id="18791" label="1111110100 (1) 1101110100" source="14898" target="14938" cy:directed="1"/>
      <edge id="18790" label="1111110100 (1) 1011110100" source="14898" target="14908" cy:directed="1"/>
      <edge id="18789" label="1111110100 (1) 0111110100" source="14898" target="14896" cy:directed="1"/>
      <edge id="18788" label="0111100101 (1) 0111100100" source="14897" target="15018" cy:directed="1"/>
      <edge id="18787" label="0111100101 (1) 0111110101" source="14897" target="14700" cy:directed="1"/>
      <edge id="18786" label="0111100101 (1) 0110100101" source="14897" target="14979" cy:directed="1"/>
      <edge id="18785" label="0111100101 (1) 0101100101" source="14897" target="14937" cy:directed="1"/>
      <edge id="18784" label="0111100101 (1) 0011100101" source="14897" target="14911" cy:directed="1"/>
      <edge id="18783" label="0111100101 (1) 1111100101" source="14897" target="14899" cy:directed="1"/>
      <edge id="18782" label="0111110100 (1) 0111110101" source="14896" target="14700" cy:directed="1"/>
      <edge id="18781" label="0111110100 (1) 0111110000" source="14896" target="15238" cy:directed="1"/>
      <edge id="18780" label="0111110100 (1) 0111111100" source="14896" target="14776" cy:directed="1"/>
      <edge id="18779" label="0111110100 (1) 0110110100" source="14896" target="14978" cy:directed="1"/>
      <edge id="18778" label="0111110100 (1) 0101110100" source="14896" target="14936" cy:directed="1"/>
      <edge id="18777" label="0111110100 (1) 0011110100" source="14896" target="14910" cy:directed="1"/>
      <edge id="18776" label="0111110100 (1) 1111110100" source="14896" target="14898" cy:directed="1"/>
      <edge id="18775" label="0110010100 (1) 0110010101" source="14895" target="14894" cy:directed="1"/>
      <edge id="18774" label="0110010100 (1) 0110010110" source="14895" target="14893" cy:directed="1"/>
      <edge id="18773" label="0110010100 (1) 0110010000" source="14895" target="15237" cy:directed="1"/>
      <edge id="18772" label="0110010100 (1) 0110011100" source="14895" target="14992" cy:directed="1"/>
      <edge id="18771" label="0110010100 (1) 0110000100" source="14895" target="15077" cy:directed="1"/>
      <edge id="18770" label="0110010100 (1) 0110110100" source="14895" target="14978" cy:directed="1"/>
      <edge id="18769" label="0110010100 (1) 0100010100" source="14895" target="14935" cy:directed="1"/>
      <edge id="18768" label="0110010100 (1) 0010010100" source="14895" target="14951" cy:directed="1"/>
      <edge id="18767" label="0110010100 (1) 1110010100" source="14895" target="14892" cy:directed="1"/>
      <edge id="18766" label="0110010101 (1) 0110010100" source="14894" target="14895" cy:directed="1"/>
      <edge id="18765" label="0110010101 (1) 0110010111" source="14894" target="14468" cy:directed="1"/>
      <edge id="18764" label="0110010101 (1) 0110011101" source="14894" target="14637" cy:directed="1"/>
      <edge id="18763" label="0110010101 (1) 0110000101" source="14894" target="15076" cy:directed="1"/>
      <edge id="18762" label="0110010101 (1) 0110110101" source="14894" target="14747" cy:directed="1"/>
      <edge id="18761" label="0110010101 (1) 0100010101" source="14894" target="14934" cy:directed="1"/>
      <edge id="18760" label="0110010101 (1) 0010010101" source="14894" target="14901" cy:directed="1"/>
      <edge id="18759" label="0110010101 (1) 1110010101" source="14894" target="14891" cy:directed="1"/>
      <edge id="18758" label="0110010110 (1) 0110010111" source="14893" target="14468" cy:directed="1"/>
      <edge id="18757" label="0110010110 (1) 0110010010" source="14893" target="15235" cy:directed="1"/>
      <edge id="18756" label="0110010110 (1) 0110000110" source="14893" target="15075" cy:directed="1"/>
      <edge id="18755" label="0110010110 (1) 0110110110" source="14893" target="14516" cy:directed="1"/>
      <edge id="18754" label="0110010110 (1) 0100010110" source="14893" target="14933" cy:directed="1"/>
      <edge id="18753" label="0110010110 (1) 0010010110" source="14893" target="14900" cy:directed="1"/>
      <edge id="18752" label="0110010110 (1) 1110010110" source="14893" target="14890" cy:directed="1"/>
      <edge id="18751" label="1110010100 (1) 1110010101" source="14892" target="14891" cy:directed="1"/>
      <edge id="18750" label="1110010100 (1) 1110010110" source="14892" target="14890" cy:directed="1"/>
      <edge id="18749" label="1110010100 (1) 1110010000" source="14892" target="15233" cy:directed="1"/>
      <edge id="18748" label="1110010100 (1) 1110011100" source="14892" target="14997" cy:directed="1"/>
      <edge id="18747" label="1110010100 (1) 1110000100" source="14892" target="15091" cy:directed="1"/>
      <edge id="18746" label="1110010100 (1) 1110110100" source="14892" target="14980" cy:directed="1"/>
      <edge id="18745" label="1110010100 (1) 1100010100" source="14892" target="14931" cy:directed="1"/>
      <edge id="18744" label="1110010100 (1) 1010010100" source="14892" target="14940" cy:directed="1"/>
      <edge id="18743" label="1110010100 (1) 0110010100" source="14892" target="14895" cy:directed="1"/>
      <edge id="18742" label="1110010101 (1) 1110010100" source="14891" target="14892" cy:directed="1"/>
      <edge id="18741" label="1110010101 (1) 1110010111" source="14891" target="14471" cy:directed="1"/>
      <edge id="18740" label="1110010101 (1) 1110011101" source="14891" target="14640" cy:directed="1"/>
      <edge id="18739" label="1110010101 (1) 1110000101" source="14891" target="15080" cy:directed="1"/>
      <edge id="18738" label="1110010101 (1) 1110110101" source="14891" target="14746" cy:directed="1"/>
      <edge id="18737" label="1110010101 (1) 1100010101" source="14891" target="14930" cy:directed="1"/>
      <edge id="18736" label="1110010101 (1) 1010010101" source="14891" target="14903" cy:directed="1"/>
      <edge id="18735" label="1110010101 (1) 0110010101" source="14891" target="14894" cy:directed="1"/>
      <edge id="18734" label="1110010110 (1) 1110010111" source="14890" target="14471" cy:directed="1"/>
      <edge id="18733" label="1110010110 (1) 1110010010" source="14890" target="15231" cy:directed="1"/>
      <edge id="18732" label="1110010110 (1) 1110000110" source="14890" target="15079" cy:directed="1"/>
      <edge id="18731" label="1110010110 (1) 1110110110" source="14890" target="14512" cy:directed="1"/>
      <edge id="18730" label="1110010110 (1) 1100010110" source="14890" target="14929" cy:directed="1"/>
      <edge id="18729" label="1110010110 (1) 1010010110" source="14890" target="14902" cy:directed="1"/>
      <edge id="18728" label="1110010110 (1) 0110010110" source="14890" target="14893" cy:directed="1"/>
      <edge id="18727" label="0000100010 (1) 0000100011" source="14889" target="14888" cy:directed="1"/>
      <edge id="18726" label="0000100010 (1) 0000100000" source="14889" target="15303" cy:directed="1"/>
      <edge id="18725" label="0000100010 (1) 0000110010" source="14889" target="14887" cy:directed="1"/>
      <edge id="18724" label="0000100010 (1) 0000000010" source="14889" target="15359" cy:directed="1"/>
      <edge id="18723" label="0000100010 (1) 0001100010" source="14889" target="14886" cy:directed="1"/>
      <edge id="18722" label="0000100010 (1) 0010100010" source="14889" target="14885" cy:directed="1"/>
      <edge id="18721" label="0000100010 (1) 1000100010" source="14889" target="14884" cy:directed="1"/>
      <edge id="18720" label="0000100011 (1) 0000100010" source="14888" target="14889" cy:directed="1"/>
      <edge id="18719" label="0000100011 (1) 0000100001" source="14888" target="15302" cy:directed="1"/>
      <edge id="18718" label="0000100011 (1) 0000100111" source="14888" target="14543" cy:directed="1"/>
      <edge id="18717" label="0000100011 (1) 0000110011" source="14888" target="14699" cy:directed="1"/>
      <edge id="18716" label="0000100011 (1) 0000000011" source="14888" target="15017" cy:directed="1"/>
      <edge id="18715" label="0000100011 (1) 0001100011" source="14888" target="14807" cy:directed="1"/>
      <edge id="18714" label="0000100011 (1) 0010100011" source="14888" target="14859" cy:directed="1"/>
      <edge id="18713" label="0000100011 (1) 1000100011" source="14888" target="14883" cy:directed="1"/>
      <edge id="18712" label="0000110010 (1) 0000110011" source="14887" target="14699" cy:directed="1"/>
      <edge id="18711" label="0000110010 (1) 0000110000" source="14887" target="15301" cy:directed="1"/>
      <edge id="18710" label="0000110010 (1) 0000010010" source="14887" target="15270" cy:directed="1"/>
      <edge id="18709" label="0000110010 (1) 0001110010" source="14887" target="14806" cy:directed="1"/>
      <edge id="18708" label="0000110010 (1) 0010110010" source="14887" target="14858" cy:directed="1"/>
      <edge id="18707" label="0000110010 (1) 1000110010" source="14887" target="14882" cy:directed="1"/>
      <edge id="18706" label="0001100010 (1) 0001100011" source="14886" target="14807" cy:directed="1"/>
      <edge id="18705" label="0001100010 (1) 0001100000" source="14886" target="15300" cy:directed="1"/>
      <edge id="18704" label="0001100010 (1) 0001110010" source="14886" target="14806" cy:directed="1"/>
      <edge id="18703" label="0001100010 (1) 0001000010" source="14886" target="15330" cy:directed="1"/>
      <edge id="18702" label="0001100010 (1) 0011100010" source="14886" target="14805" cy:directed="1"/>
      <edge id="18701" label="0001100010 (1) 1001100010" source="14886" target="14881" cy:directed="1"/>
      <edge id="18700" label="0010100010 (1) 0010100011" source="14885" target="14859" cy:directed="1"/>
      <edge id="18699" label="0010100010 (1) 0010100000" source="14885" target="15299" cy:directed="1"/>
      <edge id="18698" label="0010100010 (1) 0010110010" source="14885" target="14858" cy:directed="1"/>
      <edge id="18697" label="0010100010 (1) 0010000010" source="14885" target="15339" cy:directed="1"/>
      <edge id="18696" label="0010100010 (1) 1010100010" source="14885" target="14880" cy:directed="1"/>
      <edge id="18695" label="1000100010 (1) 1000100011" source="14884" target="14883" cy:directed="1"/>
      <edge id="18694" label="1000100010 (1) 1000100000" source="14884" target="15309" cy:directed="1"/>
      <edge id="18693" label="1000100010 (1) 1000110010" source="14884" target="14882" cy:directed="1"/>
      <edge id="18692" label="1000100010 (1) 1000000010" source="14884" target="15355" cy:directed="1"/>
      <edge id="18691" label="1000100010 (1) 1001100010" source="14884" target="14881" cy:directed="1"/>
      <edge id="18690" label="1000100010 (1) 1010100010" source="14884" target="14880" cy:directed="1"/>
      <edge id="18689" label="1000100010 (1) 1100100010" source="14884" target="14879" cy:directed="1"/>
      <edge id="18688" label="1000100010 (1) 0000100010" source="14884" target="14889" cy:directed="1"/>
      <edge id="18687" label="1000100011 (1) 1000100010" source="14883" target="14884" cy:directed="1"/>
      <edge id="18686" label="1000100011 (1) 1000100001" source="14883" target="15308" cy:directed="1"/>
      <edge id="18685" label="1000100011 (1) 1000100111" source="14883" target="14545" cy:directed="1"/>
      <edge id="18684" label="1000100011 (1) 1000110011" source="14883" target="14698" cy:directed="1"/>
      <edge id="18683" label="1000100011 (1) 1000000011" source="14883" target="15016" cy:directed="1"/>
      <edge id="18682" label="1000100011 (1) 1001100011" source="14883" target="14799" cy:directed="1"/>
      <edge id="18681" label="1000100011 (1) 1010100011" source="14883" target="14857" cy:directed="1"/>
      <edge id="18680" label="1000100011 (1) 1100100011" source="14883" target="14874" cy:directed="1"/>
      <edge id="18679" label="1000100011 (1) 0000100011" source="14883" target="14888" cy:directed="1"/>
      <edge id="18678" label="1000110010 (1) 1000110011" source="14882" target="14698" cy:directed="1"/>
      <edge id="18677" label="1000110010 (1) 1000110000" source="14882" target="15307" cy:directed="1"/>
      <edge id="18676" label="1000110010 (1) 1000010010" source="14882" target="15275" cy:directed="1"/>
      <edge id="18675" label="1000110010 (1) 1001110010" source="14882" target="14798" cy:directed="1"/>
      <edge id="18674" label="1000110010 (1) 1010110010" source="14882" target="14856" cy:directed="1"/>
      <edge id="18673" label="1000110010 (1) 0000110010" source="14882" target="14887" cy:directed="1"/>
      <edge id="18672" label="1001100010 (1) 1001100011" source="14881" target="14799" cy:directed="1"/>
      <edge id="18671" label="1001100010 (1) 1001100000" source="14881" target="15306" cy:directed="1"/>
      <edge id="18670" label="1001100010 (1) 1001110010" source="14881" target="14798" cy:directed="1"/>
      <edge id="18669" label="1001100010 (1) 1001000010" source="14881" target="15332" cy:directed="1"/>
      <edge id="18668" label="1001100010 (1) 1011100010" source="14881" target="14797" cy:directed="1"/>
      <edge id="18667" label="1001100010 (1) 1101100010" source="14881" target="14960" cy:directed="1"/>
      <edge id="18666" label="1001100010 (1) 0001100010" source="14881" target="14886" cy:directed="1"/>
      <edge id="18665" label="1010100010 (1) 1010100011" source="14880" target="14857" cy:directed="1"/>
      <edge id="18664" label="1010100010 (1) 1010100000" source="14880" target="15305" cy:directed="1"/>
      <edge id="18663" label="1010100010 (1) 1010110010" source="14880" target="14856" cy:directed="1"/>
      <edge id="18662" label="1010100010 (1) 1010000010" source="14880" target="15343" cy:directed="1"/>
      <edge id="18661" label="1010100010 (1) 1110100010" source="14880" target="14855" cy:directed="1"/>
      <edge id="18660" label="1010100010 (1) 0010100010" source="14880" target="14885" cy:directed="1"/>
      <edge id="18659" label="1100100010 (1) 1100100011" source="14879" target="14874" cy:directed="1"/>
      <edge id="18658" label="1100100010 (1) 1100100000" source="14879" target="15304" cy:directed="1"/>
      <edge id="18657" label="1100100010 (1) 1100110010" source="14879" target="14873" cy:directed="1"/>
      <edge id="18656" label="1100100010 (1) 1100000010" source="14879" target="15347" cy:directed="1"/>
      <edge id="18655" label="1100100010 (1) 1101100010" source="14879" target="14960" cy:directed="1"/>
      <edge id="18654" label="1100100010 (1) 0100100010" source="14879" target="14872" cy:directed="1"/>
      <edge id="18653" label="0010111001 (1) 0010111000" source="14878" target="15164" cy:directed="1"/>
      <edge id="18652" label="0010111001 (1) 0010111101" source="14878" target="14535" cy:directed="1"/>
      <edge id="18651" label="0010111001 (1) 0010011001" source="14878" target="15007" cy:directed="1"/>
      <edge id="18650" label="0010111001 (1) 1010111001" source="14878" target="14876" cy:directed="1"/>
      <edge id="18649" label="0010111100 (1) 0010111101" source="14877" target="14535" cy:directed="1"/>
      <edge id="18648" label="0010111100 (1) 0010011100" source="14877" target="15005" cy:directed="1"/>
      <edge id="18647" label="0010111100 (1) 1010111100" source="14877" target="14875" cy:directed="1"/>
      <edge id="18646" label="1010111001 (1) 1010111000" source="14876" target="15162" cy:directed="1"/>
      <edge id="18645" label="1010111001 (1) 1010111101" source="14876" target="14534" cy:directed="1"/>
      <edge id="18644" label="1010111001 (1) 1010011001" source="14876" target="15004" cy:directed="1"/>
      <edge id="18643" label="1010111001 (1) 0010111001" source="14876" target="14878" cy:directed="1"/>
      <edge id="18642" label="1010111100 (1) 1010111101" source="14875" target="14534" cy:directed="1"/>
      <edge id="18641" label="1010111100 (1) 1010011100" source="14875" target="15002" cy:directed="1"/>
      <edge id="18640" label="1010111100 (1) 0010111100" source="14875" target="14877" cy:directed="1"/>
      <edge id="18639" label="1100100011 (1) 1100100010" source="14874" target="14879" cy:directed="1"/>
      <edge id="18638" label="1100100011 (1) 1100100001" source="14874" target="15295" cy:directed="1"/>
      <edge id="18637" label="1100100011 (1) 1100100111" source="14874" target="14530" cy:directed="1"/>
      <edge id="18636" label="1100100011 (1) 1100110011" source="14874" target="14689" cy:directed="1"/>
      <edge id="18635" label="1100100011 (1) 1100000011" source="14874" target="15013" cy:directed="1"/>
      <edge id="18634" label="1100100011 (1) 1101100011" source="14874" target="14786" cy:directed="1"/>
      <edge id="18633" label="1100100011 (1) 0100100011" source="14874" target="14871" cy:directed="1"/>
      <edge id="18632" label="1100110010 (1) 1100110011" source="14873" target="14689" cy:directed="1"/>
      <edge id="18631" label="1100110010 (1) 1100110000" source="14873" target="15294" cy:directed="1"/>
      <edge id="18630" label="1100110010 (1) 1100010010" source="14873" target="15261" cy:directed="1"/>
      <edge id="18629" label="1100110010 (1) 1101110010" source="14873" target="14785" cy:directed="1"/>
      <edge id="18628" label="1100110010 (1) 1000110010" source="14873" target="14882" cy:directed="1"/>
      <edge id="18627" label="1100110010 (1) 0100110010" source="14873" target="14870" cy:directed="1"/>
      <edge id="18626" label="0100100010 (1) 0100100011" source="14872" target="14871" cy:directed="1"/>
      <edge id="18625" label="0100100010 (1) 0100100000" source="14872" target="15298" cy:directed="1"/>
      <edge id="18624" label="0100100010 (1) 0100110010" source="14872" target="14870" cy:directed="1"/>
      <edge id="18623" label="0100100010 (1) 0100000010" source="14872" target="15350" cy:directed="1"/>
      <edge id="18622" label="0100100010 (1) 0101100010" source="14872" target="14956" cy:directed="1"/>
      <edge id="18621" label="0100100010 (1) 0000100010" source="14872" target="14889" cy:directed="1"/>
      <edge id="18620" label="0100100010 (1) 1100100010" source="14872" target="14879" cy:directed="1"/>
      <edge id="18619" label="0100100011 (1) 0100100010" source="14871" target="14872" cy:directed="1"/>
      <edge id="18618" label="0100100011 (1) 0100100001" source="14871" target="15297" cy:directed="1"/>
      <edge id="18617" label="0100100011 (1) 0100100111" source="14871" target="14533" cy:directed="1"/>
      <edge id="18616" label="0100100011 (1) 0100110011" source="14871" target="14688" cy:directed="1"/>
      <edge id="18615" label="0100100011 (1) 0100000011" source="14871" target="15012" cy:directed="1"/>
      <edge id="18614" label="0100100011 (1) 0101100011" source="14871" target="14788" cy:directed="1"/>
      <edge id="18613" label="0100100011 (1) 0000100011" source="14871" target="14888" cy:directed="1"/>
      <edge id="18612" label="0100100011 (1) 1100100011" source="14871" target="14874" cy:directed="1"/>
      <edge id="18611" label="0100110010 (1) 0100110011" source="14870" target="14688" cy:directed="1"/>
      <edge id="18610" label="0100110010 (1) 0100110000" source="14870" target="15296" cy:directed="1"/>
      <edge id="18609" label="0100110010 (1) 0100010010" source="14870" target="15256" cy:directed="1"/>
      <edge id="18608" label="0100110010 (1) 0101110010" source="14870" target="14787" cy:directed="1"/>
      <edge id="18607" label="0100110010 (1) 0000110010" source="14870" target="14887" cy:directed="1"/>
      <edge id="18606" label="0100110010 (1) 1100110010" source="14870" target="14873" cy:directed="1"/>
      <edge id="18605" label="1110111001 (1) 1110111000" source="14869" target="15156" cy:directed="1"/>
      <edge id="18604" label="1110111001 (1) 1110111101" source="14869" target="14523" cy:directed="1"/>
      <edge id="18603" label="1110111001 (1) 1110011001" source="14869" target="14999" cy:directed="1"/>
      <edge id="18602" label="1110111001 (1) 1100111001" source="14869" target="14907" cy:directed="1"/>
      <edge id="18601" label="1110111001 (1) 1010111001" source="14869" target="14876" cy:directed="1"/>
      <edge id="18600" label="1110111001 (1) 0110111001" source="14869" target="14867" cy:directed="1"/>
      <edge id="18599" label="1110111100 (1) 1110111101" source="14868" target="14523" cy:directed="1"/>
      <edge id="18598" label="1110111100 (1) 1110011100" source="14868" target="14997" cy:directed="1"/>
      <edge id="18597" label="1110111100 (1) 1100111100" source="14868" target="14906" cy:directed="1"/>
      <edge id="18596" label="1110111100 (1) 1010111100" source="14868" target="14875" cy:directed="1"/>
      <edge id="18595" label="1110111100 (1) 0110111100" source="14868" target="14866" cy:directed="1"/>
      <edge id="18594" label="0110111001 (1) 0110111000" source="14867" target="15154" cy:directed="1"/>
      <edge id="18593" label="0110111001 (1) 0110111101" source="14867" target="14522" cy:directed="1"/>
      <edge id="18592" label="0110111001 (1) 0110011001" source="14867" target="14994" cy:directed="1"/>
      <edge id="18591" label="0110111001 (1) 0100111001" source="14867" target="14913" cy:directed="1"/>
      <edge id="18590" label="0110111001 (1) 0010111001" source="14867" target="14878" cy:directed="1"/>
      <edge id="18589" label="0110111001 (1) 1110111001" source="14867" target="14869" cy:directed="1"/>
      <edge id="18588" label="0110111100 (1) 0110111101" source="14866" target="14522" cy:directed="1"/>
      <edge id="18587" label="0110111100 (1) 0110011100" source="14866" target="14992" cy:directed="1"/>
      <edge id="18586" label="0110111100 (1) 0100111100" source="14866" target="14912" cy:directed="1"/>
      <edge id="18585" label="0110111100 (1) 0010111100" source="14866" target="14877" cy:directed="1"/>
      <edge id="18584" label="0110111100 (1) 1110111100" source="14866" target="14868" cy:directed="1"/>
      <edge id="18583" label="1001010101 (1) 1001010100" source="14865" target="14941" cy:directed="1"/>
      <edge id="18582" label="1001010101 (1) 1001010111" source="14865" target="14456" cy:directed="1"/>
      <edge id="18581" label="1001010101 (1) 1001011101" source="14865" target="14605" cy:directed="1"/>
      <edge id="18580" label="1001010101 (1) 1001000101" source="14865" target="15059" cy:directed="1"/>
      <edge id="18579" label="1001010101 (1) 1001110101" source="14865" target="14737" cy:directed="1"/>
      <edge id="18578" label="1001010101 (1) 1011010101" source="14865" target="14819" cy:directed="1"/>
      <edge id="18577" label="1001010101 (1) 0001010101" source="14865" target="14862" cy:directed="1"/>
      <edge id="18576" label="1001010110 (1) 1001010111" source="14864" target="14456" cy:directed="1"/>
      <edge id="18575" label="1001010110 (1) 1001010010" source="14864" target="15225" cy:directed="1"/>
      <edge id="18574" label="1001010110 (1) 1001000110" source="14864" target="15058" cy:directed="1"/>
      <edge id="18573" label="1001010110 (1) 1001110110" source="14864" target="14500" cy:directed="1"/>
      <edge id="18572" label="1001010110 (1) 1011010110" source="14864" target="14818" cy:directed="1"/>
      <edge id="18571" label="1001010110 (1) 0001010110" source="14864" target="14861" cy:directed="1"/>
      <edge id="18570" label="1011010100 (1) 1011010101" source="14863" target="14819" cy:directed="1"/>
      <edge id="18569" label="1011010100 (1) 1011010110" source="14863" target="14818" cy:directed="1"/>
      <edge id="18568" label="1011010100 (1) 1011010000" source="14863" target="15197" cy:directed="1"/>
      <edge id="18567" label="1011010100 (1) 1011011100" source="14863" target="14944" cy:directed="1"/>
      <edge id="18566" label="1011010100 (1) 1011000100" source="14863" target="15056" cy:directed="1"/>
      <edge id="18565" label="1011010100 (1) 1011110100" source="14863" target="14908" cy:directed="1"/>
      <edge id="18564" label="1011010100 (1) 1010010100" source="14863" target="14940" cy:directed="1"/>
      <edge id="18563" label="1011010100 (1) 0011010100" source="14863" target="14860" cy:directed="1"/>
      <edge id="18562" label="0001010101 (1) 0001010100" source="14862" target="14952" cy:directed="1"/>
      <edge id="18561" label="0001010101 (1) 0001010111" source="14862" target="14457" cy:directed="1"/>
      <edge id="18560" label="0001010101 (1) 0001011101" source="14862" target="14607" cy:directed="1"/>
      <edge id="18559" label="0001010101 (1) 0001000101" source="14862" target="15063" cy:directed="1"/>
      <edge id="18558" label="0001010101 (1) 0001110101" source="14862" target="14738" cy:directed="1"/>
      <edge id="18557" label="0001010101 (1) 0011010101" source="14862" target="14817" cy:directed="1"/>
      <edge id="18556" label="0001010101 (1) 1001010101" source="14862" target="14865" cy:directed="1"/>
      <edge id="18555" label="0001010110 (1) 0001010111" source="14861" target="14457" cy:directed="1"/>
      <edge id="18554" label="0001010110 (1) 0001010010" source="14861" target="15228" cy:directed="1"/>
      <edge id="18553" label="0001010110 (1) 0001000110" source="14861" target="15062" cy:directed="1"/>
      <edge id="18552" label="0001010110 (1) 0001110110" source="14861" target="14504" cy:directed="1"/>
      <edge id="18551" label="0001010110 (1) 0011010110" source="14861" target="14816" cy:directed="1"/>
      <edge id="18550" label="0001010110 (1) 1001010110" source="14861" target="14864" cy:directed="1"/>
      <edge id="18549" label="0011010100 (1) 0011010101" source="14860" target="14817" cy:directed="1"/>
      <edge id="18548" label="0011010100 (1) 0011010110" source="14860" target="14816" cy:directed="1"/>
      <edge id="18547" label="0011010100 (1) 0011010000" source="14860" target="15201" cy:directed="1"/>
      <edge id="18546" label="0011010100 (1) 0011011100" source="14860" target="14947" cy:directed="1"/>
      <edge id="18545" label="0011010100 (1) 0011000100" source="14860" target="15060" cy:directed="1"/>
      <edge id="18544" label="0011010100 (1) 0011110100" source="14860" target="14910" cy:directed="1"/>
      <edge id="18543" label="0011010100 (1) 0010010100" source="14860" target="14951" cy:directed="1"/>
      <edge id="18542" label="0011010100 (1) 1011010100" source="14860" target="14863" cy:directed="1"/>
      <edge id="18541" label="0010100011 (1) 0010100010" source="14859" target="14885" cy:directed="1"/>
      <edge id="18540" label="0010100011 (1) 0010100001" source="14859" target="15293" cy:directed="1"/>
      <edge id="18539" label="0010100011 (1) 0010100111" source="14859" target="14521" cy:directed="1"/>
      <edge id="18538" label="0010100011 (1) 0010110011" source="14859" target="14687" cy:directed="1"/>
      <edge id="18537" label="0010100011 (1) 0010000011" source="14859" target="14989" cy:directed="1"/>
      <edge id="18536" label="0010100011 (1) 1010100011" source="14859" target="14857" cy:directed="1"/>
      <edge id="18535" label="0010110010 (1) 0010110011" source="14858" target="14687" cy:directed="1"/>
      <edge id="18534" label="0010110010 (1) 0010110000" source="14858" target="15292" cy:directed="1"/>
      <edge id="18533" label="0010110010 (1) 0010010010" source="14858" target="15243" cy:directed="1"/>
      <edge id="18532" label="0010110010 (1) 1010110010" source="14858" target="14856" cy:directed="1"/>
      <edge id="18531" label="1010100011 (1) 1010100010" source="14857" target="14880" cy:directed="1"/>
      <edge id="18530" label="1010100011 (1) 1010100001" source="14857" target="15291" cy:directed="1"/>
      <edge id="18529" label="1010100011 (1) 1010100111" source="14857" target="14519" cy:directed="1"/>
      <edge id="18528" label="1010100011 (1) 1010110011" source="14857" target="14686" cy:directed="1"/>
      <edge id="18527" label="1010100011 (1) 1010000011" source="14857" target="14988" cy:directed="1"/>
      <edge id="18526" label="1010100011 (1) 1110100011" source="14857" target="14839" cy:directed="1"/>
      <edge id="18525" label="1010100011 (1) 0010100011" source="14857" target="14859" cy:directed="1"/>
      <edge id="18524" label="1010110010 (1) 1010110011" source="14856" target="14686" cy:directed="1"/>
      <edge id="18523" label="1010110010 (1) 1010110000" source="14856" target="15290" cy:directed="1"/>
      <edge id="18522" label="1010110010 (1) 1010010010" source="14856" target="15247" cy:directed="1"/>
      <edge id="18521" label="1010110010 (1) 0010110010" source="14856" target="14858" cy:directed="1"/>
      <edge id="18520" label="1110100010 (1) 1110100011" source="14855" target="14839" cy:directed="1"/>
      <edge id="18519" label="1110100010 (1) 1110100000" source="14855" target="15289" cy:directed="1"/>
      <edge id="18518" label="1110100010 (1) 1110110010" source="14855" target="14838" cy:directed="1"/>
      <edge id="18517" label="1110100010 (1) 1110000010" source="14855" target="15337" cy:directed="1"/>
      <edge id="18516" label="1110100010 (1) 1100100010" source="14855" target="14879" cy:directed="1"/>
      <edge id="18515" label="1110100010 (1) 0110100010" source="14855" target="14837" cy:directed="1"/>
      <edge id="18514" label="0101010101 (1) 0101010100" source="14854" target="14932" cy:directed="1"/>
      <edge id="18513" label="0101010101 (1) 0101010111" source="14854" target="14454" cy:directed="1"/>
      <edge id="18512" label="0101010101 (1) 0101011101" source="14854" target="14596" cy:directed="1"/>
      <edge id="18511" label="0101010101 (1) 0101000101" source="14854" target="15052" cy:directed="1"/>
      <edge id="18510" label="0101010101 (1) 0101110101" source="14854" target="14727" cy:directed="1"/>
      <edge id="18509" label="0101010101 (1) 0001010101" source="14854" target="14862" cy:directed="1"/>
      <edge id="18508" label="0101010101 (1) 1101010101" source="14854" target="14852" cy:directed="1"/>
      <edge id="18507" label="0101010110 (1) 0101010111" source="14853" target="14454" cy:directed="1"/>
      <edge id="18506" label="0101010110 (1) 0101010010" source="14853" target="15222" cy:directed="1"/>
      <edge id="18505" label="0101010110 (1) 0101000110" source="14853" target="15051" cy:directed="1"/>
      <edge id="18504" label="0101010110 (1) 0101110110" source="14853" target="14490" cy:directed="1"/>
      <edge id="18503" label="0101010110 (1) 0001010110" source="14853" target="14861" cy:directed="1"/>
      <edge id="18502" label="0101010110 (1) 1101010110" source="14853" target="14851" cy:directed="1"/>
      <edge id="18501" label="1101010101 (1) 1101010100" source="14852" target="14928" cy:directed="1"/>
      <edge id="18500" label="1101010101 (1) 1101010111" source="14852" target="14455" cy:directed="1"/>
      <edge id="18499" label="1101010101 (1) 1101011101" source="14852" target="14594" cy:directed="1"/>
      <edge id="18498" label="1101010101 (1) 1101000101" source="14852" target="15055" cy:directed="1"/>
      <edge id="18497" label="1101010101 (1) 1101110101" source="14852" target="14726" cy:directed="1"/>
      <edge id="18496" label="1101010101 (1) 1001010101" source="14852" target="14865" cy:directed="1"/>
      <edge id="18495" label="1101010101 (1) 0101010101" source="14852" target="14854" cy:directed="1"/>
      <edge id="18494" label="1101010110 (1) 1101010111" source="14851" target="14455" cy:directed="1"/>
      <edge id="18493" label="1101010110 (1) 1101010010" source="14851" target="15219" cy:directed="1"/>
      <edge id="18492" label="1101010110 (1) 1101000110" source="14851" target="15054" cy:directed="1"/>
      <edge id="18491" label="1101010110 (1) 1101110110" source="14851" target="14495" cy:directed="1"/>
      <edge id="18490" label="1101010110 (1) 1001010110" source="14851" target="14864" cy:directed="1"/>
      <edge id="18489" label="1101010110 (1) 0101010110" source="14851" target="14853" cy:directed="1"/>
      <edge id="18488" label="0000001100 (1) 0000001101" source="14850" target="14849" cy:directed="1"/>
      <edge id="18487" label="0000001100 (1) 0000001110" source="14850" target="14848" cy:directed="1"/>
      <edge id="18486" label="0000001100 (1) 0000001000" source="14850" target="15212" cy:directed="1"/>
      <edge id="18485" label="0000001100 (1) 0000000100" source="14850" target="15147" cy:directed="1"/>
      <edge id="18484" label="0000001100 (1) 0001001100" source="14850" target="14847" cy:directed="1"/>
      <edge id="18483" label="0000001100 (1) 0010001100" source="14850" target="14846" cy:directed="1"/>
      <edge id="18482" label="0000001100 (1) 1000001100" source="14850" target="14845" cy:directed="1"/>
      <edge id="18481" label="0000001101 (1) 0000001100" source="14849" target="14850" cy:directed="1"/>
      <edge id="18480" label="0000001101 (1) 0000001111" source="14849" target="14453" cy:directed="1"/>
      <edge id="18479" label="0000001101 (1) 0000000101" source="14849" target="15146" cy:directed="1"/>
      <edge id="18478" label="0000001101 (1) 0001001101" source="14849" target="14762" cy:directed="1"/>
      <edge id="18477" label="0000001101 (1) 0010001101" source="14849" target="14801" cy:directed="1"/>
      <edge id="18476" label="0000001101 (1) 1000001101" source="14849" target="14844" cy:directed="1"/>
      <edge id="18475" label="0000001110 (1) 0000001111" source="14848" target="14453" cy:directed="1"/>
      <edge id="18474" label="0000001110 (1) 0000001010" source="14848" target="15210" cy:directed="1"/>
      <edge id="18473" label="0000001110 (1) 0000000110" source="14848" target="15145" cy:directed="1"/>
      <edge id="18472" label="0000001110 (1) 0001001110" source="14848" target="14761" cy:directed="1"/>
      <edge id="18471" label="0000001110 (1) 0010001110" source="14848" target="14800" cy:directed="1"/>
      <edge id="18470" label="0000001110 (1) 1000001110" source="14848" target="14843" cy:directed="1"/>
      <edge id="18469" label="0001001100 (1) 0001001101" source="14847" target="14762" cy:directed="1"/>
      <edge id="18468" label="0001001100 (1) 0001001110" source="14847" target="14761" cy:directed="1"/>
      <edge id="18467" label="0001001100 (1) 0001001000" source="14847" target="15209" cy:directed="1"/>
      <edge id="18466" label="0001001100 (1) 0001000100" source="14847" target="15143" cy:directed="1"/>
      <edge id="18465" label="0001001100 (1) 0011001100" source="14847" target="14760" cy:directed="1"/>
      <edge id="18464" label="0001001100 (1) 1001001100" source="14847" target="14842" cy:directed="1"/>
      <edge id="18463" label="0010001100 (1) 0010001101" source="14846" target="14801" cy:directed="1"/>
      <edge id="18462" label="0010001100 (1) 0010001110" source="14846" target="14800" cy:directed="1"/>
      <edge id="18461" label="0010001100 (1) 0010001000" source="14846" target="15181" cy:directed="1"/>
      <edge id="18460" label="0010001100 (1) 0010000100" source="14846" target="15142" cy:directed="1"/>
      <edge id="18459" label="0010001100 (1) 1010001100" source="14846" target="14841" cy:directed="1"/>
      <edge id="18458" label="1000001100 (1) 1000001101" source="14845" target="14844" cy:directed="1"/>
      <edge id="18457" label="1000001100 (1) 1000001110" source="14845" target="14843" cy:directed="1"/>
      <edge id="18456" label="1000001100 (1) 1000001000" source="14845" target="15217" cy:directed="1"/>
      <edge id="18455" label="1000001100 (1) 1000000100" source="14845" target="15141" cy:directed="1"/>
      <edge id="18454" label="1000001100 (1) 1001001100" source="14845" target="14842" cy:directed="1"/>
      <edge id="18453" label="1000001100 (1) 1010001100" source="14845" target="14841" cy:directed="1"/>
      <edge id="18452" label="1000001100 (1) 1100001100" source="14845" target="14840" cy:directed="1"/>
      <edge id="18451" label="1000001100 (1) 0000001100" source="14845" target="14850" cy:directed="1"/>
      <edge id="18450" label="1000001101 (1) 1000001100" source="14844" target="14845" cy:directed="1"/>
      <edge id="18449" label="1000001101 (1) 1000001111" source="14844" target="14452" cy:directed="1"/>
      <edge id="18448" label="1000001101 (1) 1000000101" source="14844" target="15140" cy:directed="1"/>
      <edge id="18447" label="1000001101 (1) 1001001101" source="14844" target="14756" cy:directed="1"/>
      <edge id="18446" label="1000001101 (1) 1010001101" source="14844" target="14804" cy:directed="1"/>
      <edge id="18445" label="1000001101 (1) 1100001101" source="14844" target="14830" cy:directed="1"/>
      <edge id="18444" label="1000001101 (1) 0000001101" source="14844" target="14849" cy:directed="1"/>
      <edge id="18443" label="1000001110 (1) 1000001111" source="14843" target="14452" cy:directed="1"/>
      <edge id="18442" label="1000001110 (1) 1000001010" source="14843" target="15215" cy:directed="1"/>
      <edge id="18441" label="1000001110 (1) 1000000110" source="14843" target="15139" cy:directed="1"/>
      <edge id="18440" label="1000001110 (1) 1001001110" source="14843" target="14755" cy:directed="1"/>
      <edge id="18439" label="1000001110 (1) 1010001110" source="14843" target="14803" cy:directed="1"/>
      <edge id="18438" label="1000001110 (1) 1100001110" source="14843" target="14829" cy:directed="1"/>
      <edge id="18437" label="1000001110 (1) 0000001110" source="14843" target="14848" cy:directed="1"/>
      <edge id="18436" label="1001001100 (1) 1001001101" source="14842" target="14756" cy:directed="1"/>
      <edge id="18435" label="1001001100 (1) 1001001110" source="14842" target="14755" cy:directed="1"/>
      <edge id="18434" label="1001001100 (1) 1001001000" source="14842" target="15214" cy:directed="1"/>
      <edge id="18433" label="1001001100 (1) 1001000100" source="14842" target="15137" cy:directed="1"/>
      <edge id="18432" label="1001001100 (1) 1011001100" source="14842" target="14754" cy:directed="1"/>
      <edge id="18431" label="1001001100 (1) 1101001100" source="14842" target="14828" cy:directed="1"/>
      <edge id="18430" label="1001001100 (1) 0001001100" source="14842" target="14847" cy:directed="1"/>
      <edge id="18429" label="1010001100 (1) 1010001101" source="14841" target="14804" cy:directed="1"/>
      <edge id="18428" label="1010001100 (1) 1010001110" source="14841" target="14803" cy:directed="1"/>
      <edge id="18427" label="1010001100 (1) 1010001000" source="14841" target="15185" cy:directed="1"/>
      <edge id="18426" label="1010001100 (1) 1010000100" source="14841" target="15136" cy:directed="1"/>
      <edge id="18425" label="1010001100 (1) 1110001100" source="14841" target="14802" cy:directed="1"/>
      <edge id="18424" label="1010001100 (1) 0010001100" source="14841" target="14846" cy:directed="1"/>
      <edge id="18423" label="1100001100 (1) 1100001101" source="14840" target="14830" cy:directed="1"/>
      <edge id="18422" label="1100001100 (1) 1100001110" source="14840" target="14829" cy:directed="1"/>
      <edge id="18421" label="1100001100 (1) 1100001000" source="14840" target="15213" cy:directed="1"/>
      <edge id="18420" label="1100001100 (1) 1100000100" source="14840" target="15135" cy:directed="1"/>
      <edge id="18419" label="1100001100 (1) 1101001100" source="14840" target="14828" cy:directed="1"/>
      <edge id="18418" label="1100001100 (1) 0100001100" source="14840" target="14827" cy:directed="1"/>
      <edge id="18417" label="1110100011 (1) 1110100010" source="14839" target="14855" cy:directed="1"/>
      <edge id="18416" label="1110100011 (1) 1110100001" source="14839" target="15288" cy:directed="1"/>
      <edge id="18415" label="1110100011 (1) 1110100111" source="14839" target="14513" cy:directed="1"/>
      <edge id="18414" label="1110100011 (1) 1110110011" source="14839" target="14671" cy:directed="1"/>
      <edge id="18413" label="1110100011 (1) 1110000011" source="14839" target="14985" cy:directed="1"/>
      <edge id="18412" label="1110100011 (1) 1100100011" source="14839" target="14874" cy:directed="1"/>
      <edge id="18411" label="1110100011 (1) 0110100011" source="14839" target="14836" cy:directed="1"/>
      <edge id="18410" label="1110110010 (1) 1110110011" source="14838" target="14671" cy:directed="1"/>
      <edge id="18409" label="1110110010 (1) 1110110000" source="14838" target="15287" cy:directed="1"/>
      <edge id="18408" label="1110110010 (1) 1110010010" source="14838" target="15231" cy:directed="1"/>
      <edge id="18407" label="1110110010 (1) 1100110010" source="14838" target="14873" cy:directed="1"/>
      <edge id="18406" label="1110110010 (1) 1010110010" source="14838" target="14856" cy:directed="1"/>
      <edge id="18405" label="1110110010 (1) 0110110010" source="14838" target="14835" cy:directed="1"/>
      <edge id="18404" label="0110100010 (1) 0110100011" source="14837" target="14836" cy:directed="1"/>
      <edge id="18403" label="0110100010 (1) 0110100000" source="14837" target="15286" cy:directed="1"/>
      <edge id="18402" label="0110100010 (1) 0110110010" source="14837" target="14835" cy:directed="1"/>
      <edge id="18401" label="0110100010 (1) 0110000010" source="14837" target="15334" cy:directed="1"/>
      <edge id="18400" label="0110100010 (1) 0100100010" source="14837" target="14872" cy:directed="1"/>
      <edge id="18399" label="0110100010 (1) 0010100010" source="14837" target="14885" cy:directed="1"/>
      <edge id="18398" label="0110100010 (1) 1110100010" source="14837" target="14855" cy:directed="1"/>
      <edge id="18397" label="0110100011 (1) 0110100010" source="14836" target="14837" cy:directed="1"/>
      <edge id="18396" label="0110100011 (1) 0110100001" source="14836" target="15285" cy:directed="1"/>
      <edge id="18395" label="0110100011 (1) 0110100111" source="14836" target="14517" cy:directed="1"/>
      <edge id="18394" label="0110100011 (1) 0110110011" source="14836" target="14670" cy:directed="1"/>
      <edge id="18393" label="0110100011 (1) 0110000011" source="14836" target="14982" cy:directed="1"/>
      <edge id="18392" label="0110100011 (1) 0100100011" source="14836" target="14871" cy:directed="1"/>
      <edge id="18391" label="0110100011 (1) 0010100011" source="14836" target="14859" cy:directed="1"/>
      <edge id="18390" label="0110100011 (1) 1110100011" source="14836" target="14839" cy:directed="1"/>
      <edge id="18389" label="0110110010 (1) 0110110011" source="14835" target="14670" cy:directed="1"/>
      <edge id="18388" label="0110110010 (1) 0110110000" source="14835" target="15284" cy:directed="1"/>
      <edge id="18387" label="0110110010 (1) 0110010010" source="14835" target="15235" cy:directed="1"/>
      <edge id="18386" label="0110110010 (1) 0100110010" source="14835" target="14870" cy:directed="1"/>
      <edge id="18385" label="0110110010 (1) 0010110010" source="14835" target="14858" cy:directed="1"/>
      <edge id="18384" label="0110110010 (1) 1110110010" source="14835" target="14838" cy:directed="1"/>
      <edge id="18383" label="0001111001 (1) 0001111000" source="14834" target="15126" cy:directed="1"/>
      <edge id="18382" label="0001111001 (1) 0001111101" source="14834" target="14511" cy:directed="1"/>
      <edge id="18381" label="0001111001 (1) 0001011001" source="14834" target="14977" cy:directed="1"/>
      <edge id="18380" label="0001111001 (1) 0011111001" source="14834" target="14795" cy:directed="1"/>
      <edge id="18379" label="0001111001 (1) 1001111001" source="14834" target="14832" cy:directed="1"/>
      <edge id="18378" label="0001111100 (1) 0001111101" source="14833" target="14511" cy:directed="1"/>
      <edge id="18377" label="0001111100 (1) 0001011100" source="14833" target="14975" cy:directed="1"/>
      <edge id="18376" label="0001111100 (1) 0011111100" source="14833" target="14794" cy:directed="1"/>
      <edge id="18375" label="0001111100 (1) 1001111100" source="14833" target="14831" cy:directed="1"/>
      <edge id="18374" label="1001111001 (1) 1001111000" source="14832" target="15124" cy:directed="1"/>
      <edge id="18373" label="1001111001 (1) 1001111101" source="14832" target="14510" cy:directed="1"/>
      <edge id="18372" label="1001111001 (1) 1001011001" source="14832" target="14974" cy:directed="1"/>
      <edge id="18371" label="1001111001 (1) 1011111001" source="14832" target="14793" cy:directed="1"/>
      <edge id="18370" label="1001111001 (1) 0001111001" source="14832" target="14834" cy:directed="1"/>
      <edge id="18369" label="1001111100 (1) 1001111101" source="14831" target="14510" cy:directed="1"/>
      <edge id="18368" label="1001111100 (1) 1001011100" source="14831" target="14972" cy:directed="1"/>
      <edge id="18367" label="1001111100 (1) 1011111100" source="14831" target="14792" cy:directed="1"/>
      <edge id="18366" label="1001111100 (1) 0001111100" source="14831" target="14833" cy:directed="1"/>
      <edge id="18365" label="1100001101 (1) 1100001100" source="14830" target="14840" cy:directed="1"/>
      <edge id="18364" label="1100001101 (1) 1100001111" source="14830" target="14451" cy:directed="1"/>
      <edge id="18363" label="1100001101 (1) 1100000101" source="14830" target="15123" cy:directed="1"/>
      <edge id="18362" label="1100001101 (1) 1101001101" source="14830" target="14753" cy:directed="1"/>
      <edge id="18361" label="1100001101 (1) 0100001101" source="14830" target="14826" cy:directed="1"/>
      <edge id="18360" label="1100001110 (1) 1100001111" source="14829" target="14451" cy:directed="1"/>
      <edge id="18359" label="1100001110 (1) 1100001010" source="14829" target="15207" cy:directed="1"/>
      <edge id="18358" label="1100001110 (1) 1100000110" source="14829" target="15122" cy:directed="1"/>
      <edge id="18357" label="1100001110 (1) 1101001110" source="14829" target="14752" cy:directed="1"/>
      <edge id="18356" label="1100001110 (1) 0100001110" source="14829" target="14825" cy:directed="1"/>
      <edge id="18355" label="1101001100 (1) 1101001101" source="14828" target="14753" cy:directed="1"/>
      <edge id="18354" label="1101001100 (1) 1101001110" source="14828" target="14752" cy:directed="1"/>
      <edge id="18353" label="1101001100 (1) 1101001000" source="14828" target="15206" cy:directed="1"/>
      <edge id="18352" label="1101001100 (1) 1101000100" source="14828" target="15120" cy:directed="1"/>
      <edge id="18351" label="1101001100 (1) 1101101100" source="14828" target="14751" cy:directed="1"/>
      <edge id="18350" label="1101001100 (1) 0101001100" source="14828" target="14824" cy:directed="1"/>
      <edge id="18349" label="0100001100 (1) 0100001101" source="14827" target="14826" cy:directed="1"/>
      <edge id="18348" label="0100001100 (1) 0100001110" source="14827" target="14825" cy:directed="1"/>
      <edge id="18347" label="0100001100 (1) 0100001000" source="14827" target="15205" cy:directed="1"/>
      <edge id="18346" label="0100001100 (1) 0100000100" source="14827" target="15119" cy:directed="1"/>
      <edge id="18345" label="0100001100 (1) 0101001100" source="14827" target="14824" cy:directed="1"/>
      <edge id="18344" label="0100001100 (1) 0000001100" source="14827" target="14850" cy:directed="1"/>
      <edge id="18343" label="0100001100 (1) 1100001100" source="14827" target="14840" cy:directed="1"/>
      <edge id="18342" label="0100001101 (1) 0100001100" source="14826" target="14827" cy:directed="1"/>
      <edge id="18341" label="0100001101 (1) 0100001111" source="14826" target="14450" cy:directed="1"/>
      <edge id="18340" label="0100001101 (1) 0100000101" source="14826" target="15118" cy:directed="1"/>
      <edge id="18339" label="0100001101 (1) 0101001101" source="14826" target="14750" cy:directed="1"/>
      <edge id="18338" label="0100001101 (1) 0000001101" source="14826" target="14849" cy:directed="1"/>
      <edge id="18337" label="0100001101 (1) 1100001101" source="14826" target="14830" cy:directed="1"/>
      <edge id="18336" label="0100001110 (1) 0100001111" source="14825" target="14450" cy:directed="1"/>
      <edge id="18335" label="0100001110 (1) 0100001010" source="14825" target="15203" cy:directed="1"/>
      <edge id="18334" label="0100001110 (1) 0100000110" source="14825" target="15117" cy:directed="1"/>
      <edge id="18333" label="0100001110 (1) 0101001110" source="14825" target="14749" cy:directed="1"/>
      <edge id="18332" label="0100001110 (1) 0000001110" source="14825" target="14848" cy:directed="1"/>
      <edge id="18331" label="0100001110 (1) 1100001110" source="14825" target="14829" cy:directed="1"/>
      <edge id="18330" label="0101001100 (1) 0101001101" source="14824" target="14750" cy:directed="1"/>
      <edge id="18329" label="0101001100 (1) 0101001110" source="14824" target="14749" cy:directed="1"/>
      <edge id="18328" label="0101001100 (1) 0101001000" source="14824" target="15202" cy:directed="1"/>
      <edge id="18327" label="0101001100 (1) 0101000100" source="14824" target="15115" cy:directed="1"/>
      <edge id="18326" label="0101001100 (1) 0101101100" source="14824" target="14748" cy:directed="1"/>
      <edge id="18325" label="0101001100 (1) 0001001100" source="14824" target="14847" cy:directed="1"/>
      <edge id="18324" label="0101001100 (1) 1101001100" source="14824" target="14828" cy:directed="1"/>
      <edge id="18323" label="1101111001 (1) 1101111000" source="14823" target="15106" cy:directed="1"/>
      <edge id="18322" label="1101111001 (1) 1101111101" source="14823" target="14507" cy:directed="1"/>
      <edge id="18321" label="1101111001 (1) 1001111001" source="14823" target="14832" cy:directed="1"/>
      <edge id="18320" label="1101111001 (1) 0101111001" source="14823" target="14821" cy:directed="1"/>
      <edge id="18319" label="1101111100 (1) 1101111101" source="14822" target="14507" cy:directed="1"/>
      <edge id="18318" label="1101111100 (1) 1001111100" source="14822" target="14831" cy:directed="1"/>
      <edge id="18317" label="1101111100 (1) 0101111100" source="14822" target="14820" cy:directed="1"/>
      <edge id="18316" label="0101111001 (1) 0101111000" source="14821" target="15104" cy:directed="1"/>
      <edge id="18315" label="0101111001 (1) 0101111101" source="14821" target="14506" cy:directed="1"/>
      <edge id="18314" label="0101111001 (1) 0001111001" source="14821" target="14834" cy:directed="1"/>
      <edge id="18313" label="0101111001 (1) 1101111001" source="14821" target="14823" cy:directed="1"/>
      <edge id="18312" label="0101111100 (1) 0101111101" source="14820" target="14506" cy:directed="1"/>
      <edge id="18311" label="0101111100 (1) 0001111100" source="14820" target="14833" cy:directed="1"/>
      <edge id="18310" label="0101111100 (1) 1101111100" source="14820" target="14822" cy:directed="1"/>
      <edge id="18309" label="1011010101 (1) 1011010100" source="14819" target="14863" cy:directed="1"/>
      <edge id="18308" label="1011010101 (1) 1011010111" source="14819" target="14444" cy:directed="1"/>
      <edge id="18307" label="1011010101 (1) 1011011101" source="14819" target="14579" cy:directed="1"/>
      <edge id="18306" label="1011010101 (1) 1011000101" source="14819" target="15034" cy:directed="1"/>
      <edge id="18305" label="1011010101 (1) 1011110101" source="14819" target="14706" cy:directed="1"/>
      <edge id="18304" label="1011010101 (1) 1010010101" source="14819" target="14903" cy:directed="1"/>
      <edge id="18303" label="1011010101 (1) 0011010101" source="14819" target="14817" cy:directed="1"/>
      <edge id="18302" label="1011010110 (1) 1011010111" source="14818" target="14444" cy:directed="1"/>
      <edge id="18301" label="1011010110 (1) 1011010010" source="14818" target="15195" cy:directed="1"/>
      <edge id="18300" label="1011010110 (1) 1011000110" source="14818" target="15033" cy:directed="1"/>
      <edge id="18299" label="1011010110 (1) 1011110110" source="14818" target="14472" cy:directed="1"/>
      <edge id="18298" label="1011010110 (1) 1010010110" source="14818" target="14902" cy:directed="1"/>
      <edge id="18297" label="1011010110 (1) 0011010110" source="14818" target="14816" cy:directed="1"/>
      <edge id="18296" label="0011010101 (1) 0011010100" source="14817" target="14860" cy:directed="1"/>
      <edge id="18295" label="0011010101 (1) 0011010111" source="14817" target="14445" cy:directed="1"/>
      <edge id="18294" label="0011010101 (1) 0011011101" source="14817" target="14583" cy:directed="1"/>
      <edge id="18293" label="0011010101 (1) 0011000101" source="14817" target="15039" cy:directed="1"/>
      <edge id="18292" label="0011010101 (1) 0011110101" source="14817" target="14707" cy:directed="1"/>
      <edge id="18291" label="0011010101 (1) 0010010101" source="14817" target="14901" cy:directed="1"/>
      <edge id="18290" label="0011010101 (1) 1011010101" source="14817" target="14819" cy:directed="1"/>
      <edge id="18289" label="0011010110 (1) 0011010111" source="14816" target="14445" cy:directed="1"/>
      <edge id="18288" label="0011010110 (1) 0011010010" source="14816" target="15199" cy:directed="1"/>
      <edge id="18287" label="0011010110 (1) 0011000110" source="14816" target="15038" cy:directed="1"/>
      <edge id="18286" label="0011010110 (1) 0011110110" source="14816" target="14480" cy:directed="1"/>
      <edge id="18285" label="0011010110 (1) 0010010110" source="14816" target="14900" cy:directed="1"/>
      <edge id="18284" label="0011010110 (1) 1011010110" source="14816" target="14818" cy:directed="1"/>
      <edge id="18283" label="0111010100 (1) 0111010101" source="14815" target="14814" cy:directed="1"/>
      <edge id="18282" label="0111010100 (1) 0111010110" source="14815" target="14813" cy:directed="1"/>
      <edge id="18281" label="0111010100 (1) 0111010000" source="14815" target="15193" cy:directed="1"/>
      <edge id="18280" label="0111010100 (1) 0111011100" source="14815" target="14922" cy:directed="1"/>
      <edge id="18279" label="0111010100 (1) 0111000100" source="14815" target="15021" cy:directed="1"/>
      <edge id="18278" label="0111010100 (1) 0111110100" source="14815" target="14896" cy:directed="1"/>
      <edge id="18277" label="0111010100 (1) 0110010100" source="14815" target="14895" cy:directed="1"/>
      <edge id="18276" label="0111010100 (1) 0101010100" source="14815" target="14932" cy:directed="1"/>
      <edge id="18275" label="0111010100 (1) 0011010100" source="14815" target="14860" cy:directed="1"/>
      <edge id="18274" label="0111010100 (1) 1111010100" source="14815" target="14812" cy:directed="1"/>
      <edge id="18273" label="0111010101 (1) 0111010100" source="14814" target="14815" cy:directed="1"/>
      <edge id="18272" label="0111010101 (1) 0111010111" source="14814" target="14438" cy:directed="1"/>
      <edge id="18271" label="0111010101 (1) 0111011101" source="14814" target="14575" cy:directed="1"/>
      <edge id="18270" label="0111010101 (1) 0111000101" source="14814" target="15020" cy:directed="1"/>
      <edge id="18269" label="0111010101 (1) 0111110101" source="14814" target="14700" cy:directed="1"/>
      <edge id="18268" label="0111010101 (1) 0110010101" source="14814" target="14894" cy:directed="1"/>
      <edge id="18267" label="0111010101 (1) 0101010101" source="14814" target="14854" cy:directed="1"/>
      <edge id="18266" label="0111010101 (1) 0011010101" source="14814" target="14817" cy:directed="1"/>
      <edge id="18265" label="0111010101 (1) 1111010101" source="14814" target="14811" cy:directed="1"/>
      <edge id="18264" label="0111010110 (1) 0111010111" source="14813" target="14438" cy:directed="1"/>
      <edge id="18263" label="0111010110 (1) 0111010010" source="14813" target="15191" cy:directed="1"/>
      <edge id="18262" label="0111010110 (1) 0111000110" source="14813" target="15019" cy:directed="1"/>
      <edge id="18261" label="0111010110 (1) 0111110110" source="14813" target="14466" cy:directed="1"/>
      <edge id="18260" label="0111010110 (1) 0110010110" source="14813" target="14893" cy:directed="1"/>
      <edge id="18259" label="0111010110 (1) 0101010110" source="14813" target="14853" cy:directed="1"/>
      <edge id="18258" label="0111010110 (1) 0011010110" source="14813" target="14816" cy:directed="1"/>
      <edge id="18257" label="0111010110 (1) 1111010110" source="14813" target="14810" cy:directed="1"/>
      <edge id="18256" label="1111010100 (1) 1111010101" source="14812" target="14811" cy:directed="1"/>
      <edge id="18255" label="1111010100 (1) 1111010110" source="14812" target="14810" cy:directed="1"/>
      <edge id="18254" label="1111010100 (1) 1111010000" source="14812" target="15189" cy:directed="1"/>
      <edge id="18253" label="1111010100 (1) 1111011100" source="14812" target="14925" cy:directed="1"/>
      <edge id="18252" label="1111010100 (1) 1111000100" source="14812" target="15031" cy:directed="1"/>
      <edge id="18251" label="1111010100 (1) 1111110100" source="14812" target="14898" cy:directed="1"/>
      <edge id="18250" label="1111010100 (1) 1110010100" source="14812" target="14892" cy:directed="1"/>
      <edge id="18249" label="1111010100 (1) 1101010100" source="14812" target="14928" cy:directed="1"/>
      <edge id="18248" label="1111010100 (1) 1011010100" source="14812" target="14863" cy:directed="1"/>
      <edge id="18247" label="1111010100 (1) 0111010100" source="14812" target="14815" cy:directed="1"/>
      <edge id="18246" label="1111010101 (1) 1111010100" source="14811" target="14812" cy:directed="1"/>
      <edge id="18245" label="1111010101 (1) 1111010111" source="14811" target="14439" cy:directed="1"/>
      <edge id="18244" label="1111010101 (1) 1111011101" source="14811" target="14573" cy:directed="1"/>
      <edge id="18243" label="1111010101 (1) 1111000101" source="14811" target="15024" cy:directed="1"/>
      <edge id="18242" label="1111010101 (1) 1111110101" source="14811" target="14703" cy:directed="1"/>
      <edge id="18241" label="1111010101 (1) 1110010101" source="14811" target="14891" cy:directed="1"/>
      <edge id="18240" label="1111010101 (1) 1101010101" source="14811" target="14852" cy:directed="1"/>
      <edge id="18239" label="1111010101 (1) 1011010101" source="14811" target="14819" cy:directed="1"/>
      <edge id="18238" label="1111010101 (1) 0111010101" source="14811" target="14814" cy:directed="1"/>
      <edge id="18237" label="1111010110 (1) 1111010111" source="14810" target="14439" cy:directed="1"/>
      <edge id="18236" label="1111010110 (1) 1111010010" source="14810" target="15187" cy:directed="1"/>
      <edge id="18235" label="1111010110 (1) 1111000110" source="14810" target="15023" cy:directed="1"/>
      <edge id="18234" label="1111010110 (1) 1111110110" source="14810" target="14469" cy:directed="1"/>
      <edge id="18233" label="1111010110 (1) 1110010110" source="14810" target="14890" cy:directed="1"/>
      <edge id="18232" label="1111010110 (1) 1101010110" source="14810" target="14851" cy:directed="1"/>
      <edge id="18231" label="1111010110 (1) 1011010110" source="14810" target="14818" cy:directed="1"/>
      <edge id="18230" label="1111010110 (1) 0111010110" source="14810" target="14813" cy:directed="1"/>
      <edge id="18229" label="0000010011 (1) 0000010010" source="14809" target="15270" cy:directed="1"/>
      <edge id="18228" label="0000010011 (1) 0000010111" source="14809" target="14502" cy:directed="1"/>
      <edge id="18227" label="0000010011 (1) 0000000011" source="14809" target="15017" cy:directed="1"/>
      <edge id="18226" label="0000010011 (1) 0001010011" source="14809" target="14744" cy:directed="1"/>
      <edge id="18225" label="0000010011 (1) 1000010011" source="14809" target="14808" cy:directed="1"/>
      <edge id="18224" label="1000010011 (1) 1000010010" source="14808" target="15275" cy:directed="1"/>
      <edge id="18223" label="1000010011 (1) 1000010111" source="14808" target="14503" cy:directed="1"/>
      <edge id="18222" label="1000010011 (1) 1000000011" source="14808" target="15016" cy:directed="1"/>
      <edge id="18221" label="1000010011 (1) 1001010011" source="14808" target="14745" cy:directed="1"/>
      <edge id="18220" label="1000010011 (1) 0000010011" source="14808" target="14809" cy:directed="1"/>
      <edge id="18219" label="0001100011 (1) 0001100010" source="14807" target="14886" cy:directed="1"/>
      <edge id="18218" label="0001100011 (1) 0001100001" source="14807" target="15283" cy:directed="1"/>
      <edge id="18217" label="0001100011 (1) 0001100111" source="14807" target="14505" cy:directed="1"/>
      <edge id="18216" label="0001100011 (1) 0001110011" source="14807" target="14646" cy:directed="1"/>
      <edge id="18215" label="0001100011 (1) 0001000011" source="14807" target="14965" cy:directed="1"/>
      <edge id="18214" label="0001100011 (1) 0011100011" source="14807" target="14771" cy:directed="1"/>
      <edge id="18213" label="0001100011 (1) 1001100011" source="14807" target="14799" cy:directed="1"/>
      <edge id="18212" label="0001110010 (1) 0001110011" source="14806" target="14646" cy:directed="1"/>
      <edge id="18211" label="0001110010 (1) 0001110000" source="14806" target="15282" cy:directed="1"/>
      <edge id="18210" label="0001110010 (1) 0001010010" source="14806" target="15228" cy:directed="1"/>
      <edge id="18209" label="0001110010 (1) 0011110010" source="14806" target="14770" cy:directed="1"/>
      <edge id="18208" label="0001110010 (1) 1001110010" source="14806" target="14798" cy:directed="1"/>
      <edge id="18207" label="0011100010 (1) 0011100011" source="14805" target="14771" cy:directed="1"/>
      <edge id="18206" label="0011100010 (1) 0011100000" source="14805" target="15281" cy:directed="1"/>
      <edge id="18205" label="0011100010 (1) 0011110010" source="14805" target="14770" cy:directed="1"/>
      <edge id="18204" label="0011100010 (1) 0011000010" source="14805" target="15321" cy:directed="1"/>
      <edge id="18203" label="0011100010 (1) 0010100010" source="14805" target="14885" cy:directed="1"/>
      <edge id="18202" label="0011100010 (1) 1011100010" source="14805" target="14797" cy:directed="1"/>
      <edge id="18201" label="1010001101 (1) 1010001100" source="14804" target="14841" cy:directed="1"/>
      <edge id="18200" label="1010001101 (1) 1010001111" source="14804" target="14436" cy:directed="1"/>
      <edge id="18199" label="1010001101 (1) 1010000101" source="14804" target="15094" cy:directed="1"/>
      <edge id="18198" label="1010001101 (1) 1110001101" source="14804" target="14784" cy:directed="1"/>
      <edge id="18197" label="1010001101 (1) 0010001101" source="14804" target="14801" cy:directed="1"/>
      <edge id="18196" label="1010001110 (1) 1010001111" source="14803" target="14436" cy:directed="1"/>
      <edge id="18195" label="1010001110 (1) 1010001010" source="14803" target="15183" cy:directed="1"/>
      <edge id="18194" label="1010001110 (1) 1010000110" source="14803" target="15093" cy:directed="1"/>
      <edge id="18193" label="1010001110 (1) 1110001110" source="14803" target="14783" cy:directed="1"/>
      <edge id="18192" label="1010001110 (1) 0010001110" source="14803" target="14800" cy:directed="1"/>
      <edge id="18191" label="1110001100 (1) 1110001101" source="14802" target="14784" cy:directed="1"/>
      <edge id="18190" label="1110001100 (1) 1110001110" source="14802" target="14783" cy:directed="1"/>
      <edge id="18189" label="1110001100 (1) 1110001000" source="14802" target="15182" cy:directed="1"/>
      <edge id="18188" label="1110001100 (1) 1110000100" source="14802" target="15091" cy:directed="1"/>
      <edge id="18187" label="1110001100 (1) 1100001100" source="14802" target="14840" cy:directed="1"/>
      <edge id="18186" label="1110001100 (1) 0110001100" source="14802" target="14782" cy:directed="1"/>
      <edge id="18185" label="0010001101 (1) 0010001100" source="14801" target="14846" cy:directed="1"/>
      <edge id="18184" label="0010001101 (1) 0010001111" source="14801" target="14437" cy:directed="1"/>
      <edge id="18183" label="0010001101 (1) 0010000101" source="14801" target="15090" cy:directed="1"/>
      <edge id="18182" label="0010001101 (1) 1010001101" source="14801" target="14804" cy:directed="1"/>
      <edge id="18181" label="0010001110 (1) 0010001111" source="14800" target="14437" cy:directed="1"/>
      <edge id="18180" label="0010001110 (1) 0010001010" source="14800" target="15179" cy:directed="1"/>
      <edge id="18179" label="0010001110 (1) 0010000110" source="14800" target="15089" cy:directed="1"/>
      <edge id="18178" label="0010001110 (1) 1010001110" source="14800" target="14803" cy:directed="1"/>
      <edge id="18177" label="1001100011 (1) 1001100010" source="14799" target="14881" cy:directed="1"/>
      <edge id="18176" label="1001100011 (1) 1001100001" source="14799" target="15280" cy:directed="1"/>
      <edge id="18175" label="1001100011 (1) 1001100111" source="14799" target="14501" cy:directed="1"/>
      <edge id="18174" label="1001100011 (1) 1001110011" source="14799" target="14649" cy:directed="1"/>
      <edge id="18173" label="1001100011 (1) 1001000011" source="14799" target="14964" cy:directed="1"/>
      <edge id="18172" label="1001100011 (1) 1011100011" source="14799" target="14769" cy:directed="1"/>
      <edge id="18171" label="1001100011 (1) 1101100011" source="14799" target="14786" cy:directed="1"/>
      <edge id="18170" label="1001100011 (1) 0001100011" source="14799" target="14807" cy:directed="1"/>
      <edge id="18169" label="1001110010 (1) 1001110011" source="14798" target="14649" cy:directed="1"/>
      <edge id="18168" label="1001110010 (1) 1001110000" source="14798" target="15279" cy:directed="1"/>
      <edge id="18167" label="1001110010 (1) 1001010010" source="14798" target="15225" cy:directed="1"/>
      <edge id="18166" label="1001110010 (1) 1011110010" source="14798" target="14768" cy:directed="1"/>
      <edge id="18165" label="1001110010 (1) 0001110010" source="14798" target="14806" cy:directed="1"/>
      <edge id="18164" label="1011100010 (1) 1011100011" source="14797" target="14769" cy:directed="1"/>
      <edge id="18163" label="1011100010 (1) 1011100000" source="14797" target="15278" cy:directed="1"/>
      <edge id="18162" label="1011100010 (1) 1011110010" source="14797" target="14768" cy:directed="1"/>
      <edge id="18161" label="1011100010 (1) 1011000010" source="14797" target="15318" cy:directed="1"/>
      <edge id="18160" label="1011100010 (1) 1010100010" source="14797" target="14880" cy:directed="1"/>
      <edge id="18159" label="1011100010 (1) 1111100010" source="14797" target="14914" cy:directed="1"/>
      <edge id="18158" label="1011100010 (1) 0011100010" source="14797" target="14805" cy:directed="1"/>
      <edge id="18157" label="1000110101 (1) 1000110100" source="14796" target="15014" cy:directed="1"/>
      <edge id="18156" label="1000110101 (1) 1000111101" source="14796" target="14561" cy:directed="1"/>
      <edge id="18155" label="1000110101 (1) 1001110101" source="14796" target="14737" cy:directed="1"/>
      <edge id="18154" label="1000110101 (1) 1010110101" source="14796" target="14767" cy:directed="1"/>
      <edge id="18153" label="1000110101 (1) 0000110101" source="14796" target="14790" cy:directed="1"/>
      <edge id="18152" label="0011111001 (1) 0011111000" source="14795" target="15083" cy:directed="1"/>
      <edge id="18151" label="0011111001 (1) 0011111101" source="14795" target="14497" cy:directed="1"/>
      <edge id="18150" label="0011111001 (1) 0011011001" source="14795" target="14949" cy:directed="1"/>
      <edge id="18149" label="0011111001 (1) 0010111001" source="14795" target="14878" cy:directed="1"/>
      <edge id="18148" label="0011111001 (1) 1011111001" source="14795" target="14793" cy:directed="1"/>
      <edge id="18147" label="0011111100 (1) 0011111101" source="14794" target="14497" cy:directed="1"/>
      <edge id="18146" label="0011111100 (1) 0011011100" source="14794" target="14947" cy:directed="1"/>
      <edge id="18145" label="0011111100 (1) 0010111100" source="14794" target="14877" cy:directed="1"/>
      <edge id="18144" label="0011111100 (1) 1011111100" source="14794" target="14792" cy:directed="1"/>
      <edge id="18143" label="1011111001 (1) 1011111000" source="14793" target="15081" cy:directed="1"/>
      <edge id="18142" label="1011111001 (1) 1011111101" source="14793" target="14494" cy:directed="1"/>
      <edge id="18141" label="1011111001 (1) 1011011001" source="14793" target="14946" cy:directed="1"/>
      <edge id="18140" label="1011111001 (1) 1010111001" source="14793" target="14876" cy:directed="1"/>
      <edge id="18139" label="1011111001 (1) 0011111001" source="14793" target="14795" cy:directed="1"/>
      <edge id="18138" label="1011111100 (1) 1011111101" source="14792" target="14494" cy:directed="1"/>
      <edge id="18137" label="1011111100 (1) 1011011100" source="14792" target="14944" cy:directed="1"/>
      <edge id="18136" label="1011111100 (1) 1010111100" source="14792" target="14875" cy:directed="1"/>
      <edge id="18135" label="1011111100 (1) 0011111100" source="14792" target="14794" cy:directed="1"/>
      <edge id="18134" label="0100010011 (1) 0100010010" source="14791" target="15256" cy:directed="1"/>
      <edge id="18133" label="0100010011 (1) 0100010111" source="14791" target="14493" cy:directed="1"/>
      <edge id="18132" label="0100010011 (1) 0100000011" source="14791" target="15012" cy:directed="1"/>
      <edge id="18131" label="0100010011 (1) 0101010011" source="14791" target="14736" cy:directed="1"/>
[truncated: 290,777 more chars]
