# Supplementary material
Source: publisher figshare collection journal article supplement (https://springernature.figshare.com/ndownloader/files/17562821)
Supplement: Supplementary file 1 [file 17562821 › CytoscapeSession-2018_09_25-21_15/networks/21506-STG%2C+Model+3.xgmml]

<?xml version="1.0" encoding="UTF-8" standalone="yes"?>
<graph id="21506" label="STG, Model 3" cy:view="0" cy:registered="0" cy:documentVersion="3.0" xmlns:dc="http://purl.org/dc/elements/1.1/" xmlns:xlink="http://www.w3.org/1999/xlink" xmlns:rdf="http://www.w3.org/1999/02/22-rdf-syntax-ns#" xmlns:cy="http://www.cytoscape.org" xmlns="http://www.cs.rpi.edu/XGMML">
  <att>
    <graph id="21522" label="STG, Model 3" cy:registered="1">
      <node id="22555" label="0000000000"/>
      <node id="22554" label="0000000010"/>
      <node id="22553" label="0001000000"/>
      <node id="22552" label="1000000000"/>
      <node id="22551" label="1000000010"/>
      <node id="22550" label="1001000000"/>
      <node id="22549" label="1100000000"/>
      <node id="22548" label="1100000010"/>
      <node id="22547" label="1101000000"/>
      <node id="22546" label="0100000000"/>
      <node id="22545" label="0100000010"/>
      <node id="22544" label="0101000000"/>
      <node id="22543" label="1010000000"/>
      <node id="22542" label="1010000010"/>
      <node id="22541" label="1110000000"/>
      <node id="22540" label="0010000000"/>
      <node id="22539" label="0010000010"/>
      <node id="22538" label="1110000010"/>
      <node id="22537" label="0110000000"/>
      <node id="22536" label="0110000010"/>
      <node id="22535" label="0001000010"/>
      <node id="22534" label="1001000010"/>
      <node id="22533" label="1101000010"/>
      <node id="22532" label="1101100000"/>
      <node id="22531" label="0101000010"/>
      <node id="22530" label="0101100000"/>
      <node id="22529" label="1011000000"/>
      <node id="22528" label="1011000010"/>
      <node id="22527" label="1111000000"/>
      <node id="22526" label="0011000000"/>
      <node id="22525" label="0011000010"/>
      <node id="22524" label="1111000010"/>
      <node id="22523" label="1111100000"/>
      <node id="22522" label="0111000000"/>
      <node id="22521" label="0111000010"/>
      <node id="22520" label="0111100000"/>
      <node id="22519" label="1000100000"/>
      <node id="22518" label="1000110000"/>
      <node id="22517" label="1001100000"/>
      <node id="22516" label="1010100000"/>
      <node id="22515" label="1100100000"/>
      <node id="22514" label="0000100000"/>
      <node id="22513" label="0000110000"/>
      <node id="22512" label="0001100000"/>
      <node id="22511" label="0010100000"/>
      <node id="22510" label="1100110000"/>
      <node id="22509" label="1110100000"/>
      <node id="22508" label="0100100000"/>
      <node id="22507" label="0100110000"/>
      <node id="22506" label="0110100000"/>
      <node id="22505" label="1010110000"/>
      <node id="22504" label="0010110000"/>
      <node id="22503" label="1110110000"/>
      <node id="22502" label="0110110000"/>
      <node id="22501" label="1001110000"/>
      <node id="22500" label="1011100000"/>
      <node id="22499" label="1000010000"/>
      <node id="22498" label="1000010010"/>
      <node id="22497" label="1000011000"/>
      <node id="22496" label="1001010000"/>
      <node id="22495" label="0001110000"/>
      <node id="22494" label="0011100000"/>
      <node id="22493" label="0000010000"/>
      <node id="22492" label="0000010010"/>
      <node id="22491" label="0000011000"/>
      <node id="22490" label="0001010000"/>
      <node id="22489" label="1101110000"/>
      <node id="22488" label="1100010000"/>
      <node id="22487" label="1100010010"/>
      <node id="22486" label="1100011000"/>
      <node id="22485" label="1101010000"/>
      <node id="22484" label="0101110000"/>
      <node id="22483" label="0100010000"/>
      <node id="22482" label="0100010010"/>
      <node id="22481" label="0100011000"/>
      <node id="22480" label="0101010000"/>
      <node id="22479" label="1011110000"/>
      <node id="22478" label="1010010000"/>
      <node id="22477" label="1010010010"/>
      <node id="22476" label="1010011000"/>
      <node id="22475" label="0011110000"/>
      <node id="22474" label="0010010000"/>
      <node id="22473" label="0010010010"/>
      <node id="22472" label="0010011000"/>
      <node id="22471" label="1111110000"/>
      <node id="22470" label="1110010000"/>
      <node id="22469" label="1110010010"/>
      <node id="22468" label="1110011000"/>
      <node id="22467" label="0111110000"/>
      <node id="22466" label="0110010000"/>
      <node id="22465" label="0110010010"/>
      <node id="22464" label="0110011000"/>
      <node id="22463" label="1001010010"/>
      <node id="22462" label="1001011000"/>
      <node id="22461" label="0001010010"/>
      <node id="22460" label="0001011000"/>
      <node id="22459" label="1101010010"/>
      <node id="22458" label="1101011000"/>
      <node id="22457" label="0101010010"/>
      <node id="22456" label="0101011000"/>
      <node id="22455" label="1000001000"/>
      <node id="22454" label="1000001010"/>
      <node id="22453" label="1001001000"/>
      <node id="22452" label="1100001000"/>
      <node id="22451" label="0000001000"/>
      <node id="22450" label="0000001010"/>
      <node id="22449" label="0001001000"/>
      <node id="22448" label="1100001010"/>
      <node id="22447" label="1101001000"/>
      <node id="22446" label="0100001000"/>
      <node id="22445" label="0100001010"/>
      <node id="22444" label="0101001000"/>
      <node id="22443" label="1011010000"/>
      <node id="22442" label="1011010010"/>
      <node id="22441" label="1011011000"/>
      <node id="22440" label="0011010000"/>
      <node id="22439" label="0011010010"/>
      <node id="22438" label="0011011000"/>
      <node id="22437" label="0111010000"/>
      <node id="22436" label="0111010010"/>
      <node id="22435" label="0111011000"/>
      <node id="22434" label="1111010000"/>
      <node id="22433" label="1111010010"/>
      <node id="22432" label="1111011000"/>
      <node id="22431" label="1010001000"/>
      <node id="22430" label="1010001010"/>
      <node id="22429" label="1110001000"/>
      <node id="22428" label="0010001000"/>
      <node id="22427" label="0010001010"/>
      <node id="22426" label="1110001010"/>
      <node id="22425" label="1000111000"/>
      <node id="22424" label="0000111000"/>
      <node id="22423" label="0110001000"/>
      <node id="22422" label="0110001010"/>
      <node id="22421" label="1100111000"/>
      <node id="22420" label="0100111000"/>
      <node id="22419" label="1010111000"/>
      <node id="22418" label="1001001010"/>
      <node id="22417" label="0010111000"/>
      <node id="22416" label="0001001010"/>
      <node id="22415" label="1110111000"/>
      <node id="22414" label="1101001010"/>
      <node id="22413" label="1101101000"/>
      <node id="22412" label="0110111000"/>
      <node id="22411" label="0101001010"/>
      <node id="22410" label="0101101000"/>
      <node id="22409" label="1011001000"/>
      <node id="22408" label="1011001010"/>
      <node id="22407" label="1111001000"/>
      <node id="22406" label="1000000100"/>
      <node id="22405" label="1000000110"/>
      <node id="22404" label="1000100100"/>
      <node id="22403" label="1001000100"/>
      <node id="22402" label="1010000100"/>
      <node id="22401" label="1100000100"/>
      <node id="22400" label="0011001000"/>
      <node id="22399" label="0011001010"/>
      <node id="22398" label="0000000100"/>
      <node id="22397" label="0000000110"/>
      <node id="22396" label="0000100100"/>
      <node id="22395" label="0001000100"/>
      <node id="22394" label="0010000100"/>
      <node id="22393" label="1100000110"/>
      <node id="22392" label="1100100100"/>
      <node id="22391" label="1101000100"/>
      <node id="22390" label="1001111000"/>
      <node id="22389" label="1111001010"/>
      <node id="22388" label="1111101000"/>
      <node id="22387" label="0001111000"/>
      <node id="22386" label="0100000100"/>
      <node id="22385" label="0100000110"/>
      <node id="22384" label="0100100100"/>
      <node id="22383" label="0101000100"/>
      <node id="22382" label="0111001000"/>
      <node id="22381" label="0111001010"/>
      <node id="22380" label="0111101000"/>
      <node id="22379" label="1101111000"/>
      <node id="22378" label="0101111000"/>
      <node id="22377" label="0000101000"/>
      <node id="22376" label="0001101000"/>
      <node id="22375" label="0010101000"/>
      <node id="22374" label="1000101000"/>
      <node id="22373" label="1001101000"/>
      <node id="22372" label="1010101000"/>
      <node id="22371" label="1100101000"/>
      <node id="22370" label="1010000110"/>
      <node id="22369" label="1010100100"/>
      <node id="22368" label="1110000100"/>
      <node id="22367" label="0010000110"/>
      <node id="22366" label="0010100100"/>
      <node id="22365" label="1110101000"/>
      <node id="22364" label="0100101000"/>
      <node id="22363" label="0110101000"/>
      <node id="22362" label="1110000110"/>
      <node id="22361" label="1110100100"/>
      <node id="22360" label="1011111000"/>
      <node id="22359" label="0011111000"/>
      <node id="22358" label="0110000100"/>
      <node id="22357" label="0110000110"/>
      <node id="22356" label="0110100100"/>
      <node id="22355" label="1111111000"/>
      <node id="22354" label="0111111000"/>
      <node id="22353" label="1001000110"/>
      <node id="22352" label="1001100100"/>
      <node id="22351" label="1011000100"/>
      <node id="22350" label="0001000110"/>
      <node id="22349" label="0001100100"/>
      <node id="22348" label="0011000100"/>
      <node id="22347" label="1101000110"/>
      <node id="22346" label="1101100100"/>
      <node id="22345" label="0101000110"/>
      <node id="22344" label="0101100100"/>
      <node id="22343" label="1000011010"/>
      <node id="22342" label="1000011100"/>
      <node id="22341" label="0000011010"/>
      <node id="22340" label="0000011100"/>
      <node id="22339" label="0011101000"/>
      <node id="22338" label="1011101000"/>
      <node id="22337" label="1100011010"/>
      <node id="22336" label="1100011100"/>
      <node id="22335" label="1011000110"/>
      <node id="22334" label="1011100100"/>
      <node id="22333" label="1111000100"/>
      <node id="22332" label="0100011010"/>
      <node id="22331" label="0100011100"/>
      <node id="22330" label="0011000110"/>
      <node id="22329" label="0011100100"/>
      <node id="22328" label="1111000110"/>
      <node id="22327" label="1111100100"/>
      <node id="22326" label="0111000100"/>
      <node id="22325" label="0111000110"/>
      <node id="22324" label="0111100100"/>
      <node id="22323" label="1010011010"/>
      <node id="22322" label="1010011100"/>
      <node id="22321" label="1000110100"/>
      <node id="22320" label="0010011010"/>
      <node id="22319" label="0010011100"/>
      <node id="22318" label="0000110100"/>
      <node id="22317" label="1110011010"/>
      <node id="22316" label="1110011100"/>
      <node id="22315" label="1100110100"/>
      <node id="22314" label="0110011010"/>
      <node id="22313" label="0110011100"/>
      <node id="22312" label="0100110100"/>
      <node id="22311" label="1010110100"/>
      <node id="22310" label="0010110100"/>
      <node id="22309" label="1110110100"/>
      <node id="22308" label="1001011010"/>
      <node id="22307" label="1001011100"/>
      <node id="22306" label="0001011010"/>
      <node id="22305" label="0001011100"/>
      <node id="22304" label="0110110100"/>
      <node id="22303" label="1101011010"/>
      <node id="22302" label="1101011100"/>
      <node id="22301" label="0101011010"/>
      <node id="22300" label="0101011100"/>
      <node id="22299" label="1101100010"/>
      <node id="22298" label="1001110100"/>
      <node id="22297" label="1011011010"/>
      <node id="22296" label="1011011100"/>
      <node id="22295" label="0101100010"/>
      <node id="22294" label="0001110100"/>
      <node id="22293" label="0011011010"/>
      <node id="22292" label="0011011100"/>
      <node id="22291" label="0000010100"/>
      <node id="22290" label="0000010110"/>
      <node id="22289" label="0001010100"/>
      <node id="22288" label="0010010100"/>
      <node id="22287" label="1000010100"/>
      <node id="22286" label="1000010110"/>
      <node id="22285" label="1001010100"/>
      <node id="22284" label="1010010100"/>
      <node id="22283" label="1101110100"/>
      <node id="22282" label="0101110100"/>
      <node id="22281" label="0111011010"/>
      <node id="22280" label="0111011100"/>
      <node id="22279" label="1111011010"/>
      <node id="22278" label="1111011100"/>
      <node id="22277" label="0100010100"/>
      <node id="22276" label="0100010110"/>
      <node id="22275" label="0101010100"/>
      <node id="22274" label="1100010100"/>
      <node id="22273" label="1100010110"/>
      <node id="22272" label="1101010100"/>
      <node id="22271" label="1000111100"/>
      <node id="22270" label="0000111100"/>
      <node id="22269" label="1100111100"/>
      <node id="22268" label="1111100010"/>
      <node id="22267" label="1011110100"/>
      <node id="22266" label="0100111100"/>
      <node id="22265" label="0011110100"/>
      <node id="22264" label="0111100010"/>
      <node id="22263" label="0010010110"/>
      <node id="22262" label="1010010110"/>
      <node id="22261" label="1111110100"/>
      <node id="22260" label="0111110100"/>
      <node id="22259" label="0110010100"/>
      <node id="22258" label="0110010110"/>
      <node id="22257" label="1110010100"/>
      <node id="22256" label="1110010110"/>
      <node id="22255" label="1000100010"/>
      <node id="22254" label="1000110010"/>
      <node id="22253" label="1001100010"/>
      <node id="22252" label="1010100010"/>
      <node id="22251" label="1100100010"/>
      <node id="22250" label="0000100010"/>
      <node id="22249" label="0000110010"/>
      <node id="22248" label="0001100010"/>
      <node id="22247" label="0010100010"/>
      <node id="22246" label="1010111100"/>
      <node id="22245" label="1100110010"/>
      <node id="22244" label="1110100010"/>
      <node id="22243" label="0010111100"/>
      <node id="22242" label="0100100010"/>
      <node id="22241" label="0100110010"/>
      <node id="22240" label="0110100010"/>
      <node id="22239" label="0000000001"/>
      <node id="22238" label="0000000011"/>
      <node id="22237" label="0000000101"/>
      <node id="22236" label="0001000001"/>
      <node id="22235" label="1000000001"/>
      <node id="22234" label="1000000011"/>
      <node id="22233" label="1000000101"/>
      <node id="22232" label="1001000001"/>
      <node id="22231" label="1100000001"/>
      <node id="22230" label="1110111100"/>
      <node id="22229" label="0110111100"/>
      <node id="22228" label="1100000011"/>
      <node id="22227" label="1100000101"/>
      <node id="22226" label="1101000001"/>
      <node id="22225" label="0100000001"/>
      <node id="22224" label="0100000011"/>
      <node id="22223" label="0100000101"/>
      <node id="22222" label="0101000001"/>
      <node id="22221" label="0001010110"/>
      <node id="22220" label="0011010100"/>
      <node id="22219" label="1001010110"/>
      <node id="22218" label="1011010100"/>
      <node id="22217" label="1010110010"/>
      <node id="22216" label="0010110010"/>
      <node id="22215" label="0101010110"/>
      <node id="22214" label="1101010110"/>
      <node id="22213" label="1110110010"/>
      <node id="22212" label="1000001100"/>
      <node id="22211" label="1000001110"/>
      <node id="22210" label="1001001100"/>
      <node id="22209" label="1010001100"/>
      <node id="22208" label="1100001100"/>
      <node id="22207" label="0000001100"/>
      <node id="22206" label="0000001110"/>
      <node id="22205" label="0001001100"/>
      <node id="22204" label="0010001100"/>
      <node id="22203" label="0110110010"/>
      <node id="22202" label="1010000001"/>
      <node id="22201" label="1010000011"/>
      <node id="22200" label="1010000101"/>
      <node id="22199" label="1110000001"/>
      <node id="22198" label="0010000001"/>
      <node id="22197" label="0010000011"/>
      <node id="22196" label="0010000101"/>
      <node id="22195" label="1100001110"/>
      <node id="22194" label="1101001100"/>
      <node id="22193" label="1001111100"/>
      <node id="22192" label="0100001100"/>
      <node id="22191" label="0100001110"/>
      <node id="22190" label="0101001100"/>
      <node id="22189" label="0001111100"/>
      <node id="22188" label="1110000011"/>
      <node id="22187" label="1110000101"/>
      <node id="22186" label="0110000001"/>
      <node id="22185" label="0110000011"/>
      <node id="22184" label="0110000101"/>
      <node id="22183" label="1101111100"/>
      <node id="22182" label="0101111100"/>
      <node id="22181" label="0011010110"/>
      <node id="22180" label="1011010110"/>
      <node id="22179" label="0111010100"/>
      <node id="22178" label="0111010110"/>
      <node id="22177" label="1111010100"/>
      <node id="22176" label="1111010110"/>
      <node id="22175" label="1010001110"/>
      <node id="22174" label="1110001100"/>
      <node id="22173" label="1001110010"/>
      <node id="22172" label="1011100010"/>
      <node id="22171" label="0010001110"/>
      <node id="22170" label="0001110010"/>
      <node id="22169" label="0011100010"/>
      <node id="22168" label="1110001110"/>
      <node id="22167" label="1101110010"/>
      <node id="22166" label="0001000011"/>
      <node id="22165" label="0001000101"/>
      <node id="22164" label="1001000011"/>
      <node id="22163" label="1001000101"/>
      <node id="22162" label="1011111100"/>
      <node id="22161" label="0101110010"/>
      <node id="22160" label="0110001100"/>
      <node id="22159" label="0110001110"/>
      <node id="22158" label="0011111100"/>
      <node id="22157" label="1111111100"/>
      <node id="22156" label="0111111100"/>
      <node id="22155" label="1101000011"/>
      <node id="22154" label="1101000101"/>
      <node id="22153" label="1101100001"/>
      <node id="22152" label="0101000011"/>
      <node id="22151" label="0101000101"/>
      <node id="22150" label="0101100001"/>
      <node id="22149" label="1011110010"/>
      <node id="22148" label="0011110010"/>
      <node id="22147" label="0011000001"/>
      <node id="22146" label="0011000011"/>
      <node id="22145" label="0011000101"/>
      <node id="22144" label="1111110010"/>
      <node id="22143" label="1001001110"/>
      <node id="22142" label="1011001100"/>
      <node id="22141" label="0001001110"/>
      <node id="22140" label="0011001100"/>
      <node id="22139" label="0111110010"/>
      <node id="22138" label="1011000001"/>
      <node id="22137" label="1011000011"/>
      <node id="22136" label="1011000101"/>
      <node id="22135" label="1111000001"/>
      <node id="22134" label="1101001110"/>
      <node id="22133" label="1101101100"/>
      <node id="22132" label="0101001110"/>
      <node id="22131" label="0101101100"/>
      <node id="22130" label="1111000011"/>
      <node id="22129" label="1111000101"/>
      <node id="22128" label="1111100001"/>
      <node id="22127" label="0111000001"/>
      <node id="22126" label="0111000011"/>
      <node id="22125" label="0111000101"/>
      <node id="22124" label="0111100001"/>
      <node id="22123" label="0000100001"/>
      <node id="22122" label="0000100101"/>
      <node id="22121" label="0000110001"/>
      <node id="22120" label="0001100001"/>
      <node id="22119" label="0010100001"/>
      <node id="22118" label="1000100001"/>
      <node id="22117" label="1000100101"/>
      <node id="22116" label="1000110001"/>
      <node id="22115" label="1001100001"/>
      <node id="22114" label="1010100001"/>
      <node id="22113" label="1100100001"/>
      <node id="22112" label="1011001110"/>
      <node id="22111" label="1111001100"/>
      <node id="22110" label="0011001110"/>
      <node id="22109" label="1100100101"/>
      <node id="22108" label="1100110001"/>
      <node id="22107" label="1110100001"/>
      <node id="22106" label="0100100001"/>
      <node id="22105" label="0100100101"/>
      <node id="22104" label="0100110001"/>
      <node id="22103" label="0110100001"/>
      <node id="22102" label="1111001110"/>
      <node id="22101" label="1111101100"/>
      <node id="22100" label="0111001100"/>
      <node id="22099" label="0111001110"/>
      <node id="22098" label="0111101100"/>
      <node id="22097" label="0000101100"/>
      <node id="22096" label="0001101100"/>
      <node id="22095" label="0010101100"/>
      <node id="22094" label="1000101100"/>
      <node id="22093" label="1001101100"/>
      <node id="22092" label="1010101100"/>
      <node id="22091" label="1100101100"/>
      <node id="22090" label="0010100101"/>
      <node id="22089" label="0010110001"/>
      <node id="22088" label="1010100101"/>
      <node id="22087" label="1010110001"/>
      <node id="22086" label="1110101100"/>
      <node id="22085" label="0100101100"/>
      <node id="22084" label="0110101100"/>
      <node id="22083" label="1110100101"/>
      <node id="22082" label="1110110001"/>
      <node id="22081" label="0110100101"/>
      <node id="22080" label="0110110001"/>
      <node id="22079" label="1000010001"/>
      <node id="22078" label="1000010011"/>
      <node id="22077" label="1000010101"/>
      <node id="22076" label="1000011001"/>
      <node id="22075" label="1001010001"/>
      <node id="22074" label="0000010001"/>
      <node id="22073" label="0000010011"/>
      <node id="22072" label="0000010101"/>
      <node id="22071" label="0000011001"/>
      <node id="22070" label="0001010001"/>
      <node id="22069" label="0001100101"/>
      <node id="22068" label="0001110001"/>
      <node id="22067" label="0011100001"/>
      <node id="22066" label="1001100101"/>
      <node id="22065" label="1001110001"/>
      <node id="22064" label="1011100001"/>
      <node id="22063" label="1101100101"/>
      <node id="22062" label="1101110001"/>
      <node id="22061" label="1100010001"/>
      <node id="22060" label="1100010011"/>
      <node id="22059" label="1100010101"/>
      <node id="22058" label="1100011001"/>
      <node id="22057" label="1101010001"/>
      <node id="22056" label="0101100101"/>
      <node id="22055" label="0101110001"/>
      <node id="22054" label="0100010001"/>
      <node id="22053" label="0100010011"/>
      <node id="22052" label="0100010101"/>
      <node id="22051" label="0100011001"/>
      <node id="22050" label="0101010001"/>
      <node id="22049" label="1000011110"/>
      <node id="22048" label="1101101010"/>
      <node id="22047" label="0101101010"/>
      <node id="22046" label="0000011110"/>
      <node id="22045" label="0011101100"/>
      <node id="22044" label="1011101100"/>
      <node id="22043" label="1010010001"/>
      <node id="22042" label="1010010011"/>
      <node id="22041" label="1010010101"/>
      <node id="22040" label="1010011001"/>
      <node id="22039" label="0010010001"/>
      <node id="22038" label="0010010011"/>
      <node id="22037" label="0010010101"/>
      <node id="22036" label="0010011001"/>
      <node id="22035" label="1011100101"/>
      <node id="22034" label="1011110001"/>
      <node id="22033" label="0011100101"/>
      <node id="22032" label="0011110001"/>
      <node id="22031" label="1100011110"/>
      <node id="22030" label="0100011110"/>
      <node id="22029" label="1110010001"/>
      <node id="22028" label="1110010011"/>
      <node id="22027" label="1110010101"/>
      <node id="22026" label="1110011001"/>
      <node id="22025" label="1111100101"/>
      <node id="22024" label="1111110001"/>
      <node id="22023" label="0110010001"/>
      <node id="22022" label="0110010011"/>
      <node id="22021" label="0110010101"/>
      <node id="22020" label="0110011001"/>
      <node id="22019" label="0111100101"/>
      <node id="22018" label="0111110001"/>
      <node id="22017" label="1000100110"/>
      <node id="22016" label="0000100110"/>
      <node id="22015" label="1100100110"/>
      <node id="22014" label="1010011110"/>
      <node id="22013" label="1111101010"/>
      <node id="22012" label="0100100110"/>
      <node id="22011" label="0010011110"/>
      <node id="22010" label="0111101010"/>
      <node id="22009" label="1110011110"/>
      <node id="22008" label="0110011110"/>
      <node id="22007" label="1001010011"/>
      <node id="22006" label="1001010101"/>
      <node id="22005" label="1001011001"/>
      <node id="22004" label="0001010011"/>
      <node id="22003" label="0001010101"/>
      <node id="22002" label="0001011001"/>
      <node id="22001" label="0000101010"/>
      <node id="22000" label="0000111010"/>
      <node id="21999" label="0001101010"/>
      <node id="21998" label="0010101010"/>
      <node id="21997" label="1000101010"/>
      <node id="21996" label="1000111010"/>
      <node id="21995" label="1001101010"/>
      <node id="21994" label="1010101010"/>
      <node id="21993" label="1100101010"/>
      <node id="21992" label="1101010011"/>
      <node id="21991" label="1101010101"/>
      <node id="21990" label="1101011001"/>
      <node id="21989" label="0101010011"/>
      <node id="21988" label="0101010101"/>
      <node id="21987" label="0101011001"/>
      <node id="21986" label="1010100110"/>
      <node id="21985" label="0010100110"/>
      <node id="21984" label="1100111010"/>
      <node id="21983" label="1110101010"/>
      <node id="21982" label="0100101010"/>
      <node id="21981" label="0100111010"/>
      <node id="21980" label="0110101010"/>
      <node id="21979" label="1000001001"/>
      <node id="21978" label="1000001011"/>
      <node id="21977" label="1000001101"/>
      <node id="21976" label="1001001001"/>
      <node id="21975" label="1100001001"/>
      <node id="21974" label="0000001001"/>
      <node id="21973" label="0000001011"/>
      <node id="21972" label="0000001101"/>
      <node id="21971" label="0001001001"/>
      <node id="21970" label="1110100110"/>
      <node id="21969" label="0110100110"/>
      <node id="21968" label="1100001011"/>
      <node id="21967" label="1100001101"/>
      <node id="21966" label="1101001001"/>
      <node id="21965" label="0100001001"/>
      <node id="21964" label="0100001011"/>
      <node id="21963" label="0100001101"/>
      <node id="21962" label="0101001001"/>
      <node id="21961" label="1001011110"/>
      <node id="21960" label="0001011110"/>
      <node id="21959" label="1011010001"/>
      <node id="21958" label="1011010011"/>
      <node id="21957" label="1011010101"/>
      <node id="21956" label="1011011001"/>
      <node id="21955" label="0011010001"/>
      <node id="21954" label="0011010011"/>
      <node id="21953" label="0011010101"/>
      <node id="21952" label="0011011001"/>
      <node id="21951" label="1101011110"/>
      <node id="21950" label="0010111010"/>
      <node id="21949" label="0101011110"/>
      <node id="21948" label="1010111010"/>
      <node id="21947" label="0111010001"/>
      <node id="21946" label="0111010011"/>
      <node id="21945" label="0111010101"/>
      <node id="21944" label="0111011001"/>
      <node id="21943" label="1111010001"/>
      <node id="21942" label="1111010011"/>
      <node id="21941" label="1111010101"/>
      <node id="21940" label="1111011001"/>
      <node id="21939" label="1110111010"/>
      <node id="21938" label="0110111010"/>
      <node id="21937" label="1010001001"/>
      <node id="21936" label="1010001011"/>
      <node id="21935" label="1010001101"/>
      <node id="21934" label="1110001001"/>
      <node id="21933" label="0010001001"/>
      <node id="21932" label="0010001011"/>
      <node id="21931" label="0010001101"/>
      <node id="21930" label="1001100110"/>
      <node id="21929" label="0001100110"/>
      <node id="21928" label="1110001011"/>
      <node id="21927" label="1110001101"/>
      <node id="21926" label="0110001001"/>
      <node id="21925" label="0110001011"/>
      <node id="21924" label="0110001101"/>
      <node id="21923" label="0000110101"/>
      <node id="21922" label="0000111001"/>
      <node id="21921" label="1000110101"/>
      <node id="21920" label="1000111001"/>
      <node id="21919" label="1101100110"/>
      <node id="21918" label="1011011110"/>
      <node id="21917" label="0101100110"/>
      <node id="21916" label="0011011110"/>
      <node id="21915" label="1100110101"/>
      <node id="21914" label="1100111001"/>
      <node id="21913" label="0100110101"/>
      <node id="21912" label="0100111001"/>
      <node id="21911" label="0111011110"/>
      <node id="21910" label="1111011110"/>
      <node id="21909" label="0001111010"/>
      <node id="21908" label="0011101010"/>
      <node id="21907" label="1001111010"/>
      <node id="21906" label="1011101010"/>
      <node id="21905" label="1101111010"/>
      <node id="21904" label="1001001011"/>
      <node id="21903" label="1001001101"/>
      <node id="21902" label="1011100110"/>
      <node id="21901" label="0101111010"/>
      <node id="21900" label="0011100110"/>
      <node id="21899" label="0001001011"/>
      <node id="21898" label="0001001101"/>
      <node id="21897" label="1010110101"/>
      <node id="21896" label="1010111001"/>
      <node id="21895" label="0010110101"/>
      <node id="21894" label="0010111001"/>
      <node id="21893" label="1111100110"/>
      <node id="21892" label="0111100110"/>
      <node id="21891" label="1110110101"/>
      <node id="21890" label="1110111001"/>
      <node id="21889" label="1101001011"/>
      <node id="21888" label="1101001101"/>
      <node id="21887" label="1101101001"/>
      <node id="21886" label="0110110101"/>
      <node id="21885" label="0110111001"/>
      <node id="21884" label="0101001011"/>
      <node id="21883" label="0101001101"/>
      <node id="21882" label="0101101001"/>
      <node id="21881" label="1000110110"/>
      <node id="21880" label="0000110110"/>
      <node id="21879" label="0011111010"/>
      <node id="21878" label="1011111010"/>
      <node id="21877" label="1100110110"/>
      <node id="21876" label="1111111010"/>
      <node id="21875" label="0100110110"/>
      <node id="21874" label="1011001001"/>
      <node id="21873" label="1011001011"/>
      <node id="21872" label="1011001101"/>
      <node id="21871" label="1111001001"/>
      <node id="21870" label="1000000111"/>
      <node id="21869" label="0011001001"/>
      <node id="21868" label="0011001011"/>
      <node id="21867" label="0011001101"/>
      <node id="21866" label="0111111010"/>
      <node id="21865" label="0000000111"/>
      <node id="21864" label="1100000111"/>
      <node id="21863" label="1111001011"/>
      <node id="21862" label="1111001101"/>
      <node id="21861" label="1111101001"/>
      <node id="21860" label="1001110101"/>
      <node id="21859" label="1001111001"/>
      <node id="21858" label="0100000111"/>
      <node id="21857" label="0001110101"/>
      <node id="21856" label="0001111001"/>
      <node id="21855" label="0111001001"/>
      <node id="21854" label="0111001011"/>
      <node id="21853" label="0111001101"/>
      <node id="21852" label="0111101001"/>
      <node id="21851" label="1101110101"/>
      <node id="21850" label="1101111001"/>
      <node id="21849" label="0101110101"/>
      <node id="21848" label="0101111001"/>
      <node id="21847" label="1010110110"/>
      <node id="21846" label="0010110110"/>
      <node id="21845" label="0000101001"/>
      <node id="21844" label="0000101101"/>
      <node id="21843" label="0001101001"/>
      <node id="21842" label="0010101001"/>
      <node id="21841" label="1000101001"/>
      <node id="21840" label="1000101101"/>
      <node id="21839" label="1001101001"/>
      <node id="21838" label="1010101001"/>
      <node id="21837" label="1100101001"/>
      <node id="21836" label="1110110110"/>
      <node id="21835" label="0110110110"/>
      <node id="21834" label="0010000111"/>
      <node id="21833" label="1010000111"/>
      <node id="21832" label="1100101101"/>
      <node id="21831" label="1110101001"/>
      <node id="21830" label="0100101001"/>
      <node id="21829" label="0100101101"/>
      <node id="21828" label="0110101001"/>
      <node id="21827" label="1110000111"/>
      <node id="21826" label="1011110101"/>
      <node id="21825" label="1011111001"/>
      <node id="21824" label="0110000111"/>
      <node id="21823" label="0011110101"/>
      <node id="21822" label="0011111001"/>
      <node id="21821" label="1111110101"/>
      <node id="21820" label="1111111001"/>
      <node id="21819" label="0111110101"/>
      <node id="21818" label="0111111001"/>
      <node id="21817" label="0010101101"/>
      <node id="21816" label="1010101101"/>
      <node id="21815" label="1001110110"/>
      <node id="21814" label="0001110110"/>
      <node id="21813" label="1110101101"/>
      <node id="21812" label="0110101101"/>
      <node id="21811" label="1101110110"/>
      <node id="21810" label="1001000111"/>
      <node id="21809" label="0101110110"/>
      <node id="21808" label="0001000111"/>
      <node id="21807" label="1101000111"/>
      <node id="21806" label="0101000111"/>
      <node id="21805" label="0000111110"/>
      <node id="21804" label="1000111110"/>
      <node id="21803" label="0000011011"/>
      <node id="21802" label="0000011101"/>
      <node id="21801" label="1011110110"/>
      <node id="21800" label="0011110110"/>
      <node id="21799" label="1100111110"/>
      <node id="21798" label="0100111110"/>
      <node id="21797" label="1000011011"/>
      <node id="21796" label="1000011101"/>
      <node id="21795" label="0001101101"/>
      <node id="21794" label="0011101001"/>
      <node id="21793" label="1001101101"/>
      <node id="21792" label="1011101001"/>
      <node id="21791" label="1111110110"/>
      <node id="21790" label="0111110110"/>
      <node id="21789" label="0011000111"/>
      <node id="21788" label="1011000111"/>
      <node id="21787" label="1100011011"/>
      <node id="21786" label="1100011101"/>
      <node id="21785" label="1101101101"/>
      <node id="21784" label="0101101101"/>
      <node id="21783" label="0100011011"/>
      <node id="21782" label="0100011101"/>
      <node id="21781" label="1111000111"/>
      <node id="21780" label="0111000111"/>
      <node id="21779" label="1010111110"/>
      <node id="21778" label="0010111110"/>
      <node id="21777" label="0110111110"/>
      <node id="21776" label="1110111110"/>
      <node id="21775" label="1011101101"/>
      <node id="21774" label="1010011011"/>
      <node id="21773" label="1010011101"/>
      <node id="21772" label="0010011011"/>
      <node id="21771" label="0010011101"/>
      <node id="21770" label="0011101101"/>
      <node id="21769" label="1110011011"/>
      <node id="21768" label="1110011101"/>
      <node id="21767" label="1111101101"/>
      <node id="21766" label="0110011011"/>
      <node id="21765" label="0110011101"/>
      <node id="21764" label="0111101101"/>
      <node id="21763" label="1001111110"/>
      <node id="21762" label="0001111110"/>
      <node id="21761" label="1101111110"/>
      <node id="21760" label="0101111110"/>
      <node id="21759" label="1001011011"/>
      <node id="21758" label="1001011101"/>
      <node id="21757" label="0001011011"/>
      <node id="21756" label="0001011101"/>
      <node id="21755" label="1101011011"/>
      <node id="21754" label="1101011101"/>
      <node id="21753" label="0101011011"/>
      <node id="21752" label="0101011101"/>
      <node id="21751" label="1011111110"/>
      <node id="21750" label="0011111110"/>
      <node id="21749" label="1111111110"/>
      <node id="21748" label="0111111110"/>
      <node id="21747" label="0000010111"/>
      <node id="21746" label="1101100011"/>
      <node id="21745" label="0101100011"/>
      <node id="21744" label="1000010111"/>
      <node id="21743" label="1011011011"/>
      <node id="21742" label="1011011101"/>
      <node id="21741" label="0011011011"/>
      <node id="21740" label="0011011101"/>
      <node id="21739" label="1100010111"/>
      <node id="21738" label="0100010111"/>
      <node id="21737" label="0111011011"/>
      <node id="21736" label="0111011101"/>
      <node id="21735" label="1111011011"/>
      <node id="21734" label="1111011101"/>
      <node id="21733" label="0000111101"/>
      <node id="21732" label="1000111101"/>
      <node id="21731" label="1101101110"/>
      <node id="21730" label="0101101110"/>
      <node id="21729" label="0100111101"/>
      <node id="21728" label="1100111101"/>
      <node id="21727" label="0111100011"/>
      <node id="21726" label="1010010111"/>
      <node id="21725" label="1111100011"/>
      <node id="21724" label="0010010111"/>
      <node id="21723" label="1110010111"/>
      <node id="21722" label="0110010111"/>
      <node id="21721" label="0000100011"/>
      <node id="21720" label="0000100111"/>
      <node id="21719" label="0000110011"/>
      <node id="21718" label="0001100011"/>
      <node id="21717" label="0010100011"/>
      <node id="21716" label="1000100011"/>
      <node id="21715" label="1000100111"/>
      <node id="21714" label="1000110011"/>
      <node id="21713" label="1001100011"/>
      <node id="21712" label="1010100011"/>
      <node id="21711" label="1100100011"/>
      <node id="21710" label="1010111101"/>
      <node id="21709" label="0010111101"/>
      <node id="21708" label="1100100111"/>
      <node id="21707" label="1100110011"/>
      <node id="21706" label="1110100011"/>
      <node id="21705" label="0100100011"/>
      <node id="21704" label="0100100111"/>
      <node id="21703" label="0100110011"/>
      <node id="21702" label="0110100011"/>
      <node id="21701" label="1111101110"/>
      <node id="21700" label="0111101110"/>
      <node id="21699" label="1110111101"/>
      <node id="21698" label="0110111101"/>
      <node id="21697" label="1001010111"/>
      <node id="21696" label="0001010111"/>
      <node id="21695" label="0000101110"/>
      <node id="21694" label="0001101110"/>
      <node id="21693" label="0010101110"/>
      <node id="21692" label="1000101110"/>
      <node id="21691" label="1001101110"/>
      <node id="21690" label="1010101110"/>
      <node id="21689" label="1100101110"/>
      <node id="21688" label="1101010111"/>
      <node id="21687" label="0101010111"/>
      <node id="21686" label="0010100111"/>
      <node id="21685" label="0010110011"/>
      <node id="21684" label="1010100111"/>
      <node id="21683" label="1010110011"/>
      <node id="21682" label="1110101110"/>
      <node id="21681" label="0100101110"/>
      <node id="21680" label="0110101110"/>
      <node id="21679" label="0000001111"/>
      <node id="21678" label="1000001111"/>
      <node id="21677" label="1110100111"/>
      <node id="21676" label="1110110011"/>
      <node id="21675" label="0110100111"/>
      <node id="21674" label="0110110011"/>
      <node id="21673" label="1100001111"/>
      <node id="21672" label="1001111101"/>
      <node id="21671" label="0100001111"/>
      <node id="21670" label="0001111101"/>
      <node id="21669" label="1101111101"/>
      <node id="21668" label="1011010111"/>
      <node id="21667" label="0101111101"/>
      <node id="21666" label="0011010111"/>
      <node id="21665" label="0111010111"/>
      <node id="21664" label="1111010111"/>
      <node id="21663" label="0010001111"/>
      <node id="21662" label="1010001111"/>
      <node id="21661" label="0001100111"/>
      <node id="21660" label="0001110011"/>
      <node id="21659" label="0011100011"/>
      <node id="21658" label="1001100111"/>
      <node id="21657" label="1001110011"/>
      <node id="21656" label="1011100011"/>
      <node id="21655" label="1110001111"/>
      <node id="21654" label="1101100111"/>
      <node id="21653" label="1101110011"/>
      <node id="21652" label="1011111101"/>
      <node id="21651" label="0110001111"/>
      <node id="21650" label="0101100111"/>
      <node id="21649" label="0101110011"/>
      <node id="21648" label="0011111101"/>
      <node id="21647" label="1111111101"/>
      <node id="21646" label="0111111101"/>
      <node id="21645" label="0011101110"/>
      <node id="21644" label="1011101110"/>
      <node id="21643" label="0011100111"/>
      <node id="21642" label="0011110011"/>
      <node id="21641" label="1011100111"/>
      <node id="21640" label="1011110011"/>
      <node id="21639" label="0001001111"/>
      <node id="21638" label="1001001111"/>
      <node id="21637" label="1111100111"/>
      <node id="21636" label="1111110011"/>
      <node id="21635" label="0111100111"/>
      <node id="21634" label="0111110011"/>
      <node id="21633" label="1101001111"/>
      <node id="21632" label="0101001111"/>
      <node id="21631" label="0011001111"/>
      <node id="21630" label="1011001111"/>
      <node id="21629" label="1111001111"/>
      <node id="21628" label="0111001111"/>
      <node id="21627" label="0000110111"/>
      <node id="21626" label="1000110111"/>
      <node id="21625" label="1100110111"/>
      <node id="21624" label="0100110111"/>
      <node id="21623" label="1010110111"/>
      <node id="21622" label="0010110111"/>
      <node id="21621" label="0000011111"/>
      <node id="21620" label="1000011111"/>
      <node id="21619" label="1101101011"/>
      <node id="21618" label="1110110111"/>
      <node id="21617" label="0101101011"/>
      <node id="21616" label="0110110111"/>
      <node id="21615" label="1100011111"/>
      <node id="21614" label="0100011111"/>
      <node id="21613" label="0010011111"/>
      <node id="21612" label="1010011111"/>
      <node id="21611" label="1111101011"/>
      <node id="21610" label="1001110111"/>
      <node id="21609" label="0001110111"/>
      <node id="21608" label="0111101011"/>
      <node id="21607" label="1110011111"/>
      <node id="21606" label="1101110111"/>
      <node id="21605" label="0110011111"/>
      <node id="21604" label="0101110111"/>
      <node id="21603" label="0000101011"/>
      <node id="21602" label="0000101111"/>
      <node id="21601" label="0000111011"/>
      <node id="21600" label="0001101011"/>
      <node id="21599" label="0010101011"/>
      <node id="21598" label="1000101011"/>
      <node id="21597" label="1000101111"/>
      <node id="21596" label="1000111011"/>
      <node id="21595" label="1001101011"/>
      <node id="21594" label="1010101011"/>
      <node id="21593" label="1100101011"/>
      <node id="21592" label="1100101111"/>
      <node id="21591" label="1100111011"/>
      <node id="21590" label="1110101011"/>
      <node id="21589" label="0100101011"/>
      <node id="21588" label="0100101111"/>
      <node id="21587" label="0100111011"/>
      <node id="21586" label="0110101011"/>
      <node id="21585" label="1011110111"/>
      <node id="21584" label="0011110111"/>
      <node id="21583" label="0001011111"/>
      <node id="21582" label="1001011111"/>
      <node id="21581" label="1111110111"/>
      <node id="21580" label="0111110111"/>
      <node id="21579" label="1101011111"/>
      <node id="21578" label="0101011111"/>
      <node id="21577" label="0010101111"/>
      <node id="21576" label="0010111011"/>
      <node id="21575" label="1010101111"/>
      <node id="21574" label="1010111011"/>
      <node id="21573" label="1110101111"/>
      <node id="21572" label="1110111011"/>
      <node id="21571" label="0110101111"/>
      <node id="21570" label="0110111011"/>
      <node id="21569" label="0011011111"/>
      <node id="21568" label="1011011111"/>
      <node id="21567" label="0111011111"/>
      <node id="21566" label="1111011111"/>
      <node id="21565" label="0001101111"/>
      <node id="21564" label="0001111011"/>
      <node id="21563" label="0011101011"/>
      <node id="21562" label="1001101111"/>
      <node id="21561" label="1001111011"/>
      <node id="21560" label="1011101011"/>
      <node id="21559" label="1101101111"/>
      <node id="21558" label="1101111011"/>
      <node id="21557" label="0101101111"/>
      <node id="21556" label="0101111011"/>
      <node id="21555" label="0011101111"/>
      <node id="21554" label="0011111011"/>
      <node id="21553" label="1011101111"/>
      <node id="21552" label="1011111011"/>
      <node id="21551" label="1111101111"/>
      <node id="21550" label="1111111011"/>
      <node id="21549" label="0111101111"/>
      <node id="21548" label="0111111011"/>
      <node id="21547" label="0000111111"/>
      <node id="21546" label="1000111111"/>
      <node id="21545" label="1100111111"/>
      <node id="21544" label="0100111111"/>
      <node id="21543" label="1010111111"/>
      <node id="21542" label="0010111111"/>
      <node id="21541" label="1110111111"/>
      <node id="21540" label="0110111111"/>
      <node id="21539" label="1001111111"/>
      <node id="21538" label="0001111111"/>
      <node id="21537" label="1101111111"/>
      <node id="21536" label="0101111111"/>
      <node id="21535" label="1011111111"/>
      <node id="21534" label="0011111111"/>
      <node id="21533" label="1111111111"/>
      <node id="21532" label="0111111111"/>
      <edge id="26651" label="0000000000 (1) 0000000010" source="22555" target="22554" cy:directed="1"/>
      <edge id="26650" label="0000000000 (1) 0001000000" source="22555" target="22553" cy:directed="1"/>
      <edge id="26649" label="0000000010 (1) 0001000010" source="22554" target="22535" cy:directed="1"/>
      <edge id="26648" label="0001000000 (1) 0001000010" source="22553" target="22535" cy:directed="1"/>
      <edge id="26647" label="1000000000 (1) 1000000010" source="22552" target="22551" cy:directed="1"/>
      <edge id="26646" label="1000000000 (1) 1001000000" source="22552" target="22550" cy:directed="1"/>
      <edge id="26645" label="1000000000 (1) 1100000000" source="22552" target="22549" cy:directed="1"/>
      <edge id="26644" label="1000000010 (1) 1001000010" source="22551" target="22534" cy:directed="1"/>
      <edge id="26643" label="1000000010 (1) 1100000010" source="22551" target="22548" cy:directed="1"/>
      <edge id="26642" label="1001000000 (1) 1001000010" source="22550" target="22534" cy:directed="1"/>
      <edge id="26641" label="1001000000 (1) 1101000000" source="22550" target="22547" cy:directed="1"/>
      <edge id="26640" label="1100000000 (1) 1100000010" source="22549" target="22548" cy:directed="1"/>
      <edge id="26639" label="1100000000 (1) 1101000000" source="22549" target="22547" cy:directed="1"/>
      <edge id="26638" label="1100000010 (1) 1101000010" source="22548" target="22533" cy:directed="1"/>
      <edge id="26637" label="1101000000 (1) 1101000010" source="22547" target="22533" cy:directed="1"/>
      <edge id="26636" label="1101000000 (1) 1101100000" source="22547" target="22532" cy:directed="1"/>
      <edge id="26635" label="0100000000 (1) 0100000010" source="22546" target="22545" cy:directed="1"/>
      <edge id="26634" label="0100000000 (1) 0101000000" source="22546" target="22544" cy:directed="1"/>
      <edge id="26633" label="0100000000 (1) 0000000000" source="22546" target="22555" cy:directed="1"/>
      <edge id="26632" label="0100000010 (1) 0101000010" source="22545" target="22531" cy:directed="1"/>
      <edge id="26631" label="0100000010 (1) 0000000010" source="22545" target="22554" cy:directed="1"/>
      <edge id="26630" label="0101000000 (1) 0101000010" source="22544" target="22531" cy:directed="1"/>
      <edge id="26629" label="0101000000 (1) 0101100000" source="22544" target="22530" cy:directed="1"/>
      <edge id="26628" label="0101000000 (1) 0001000000" source="22544" target="22553" cy:directed="1"/>
      <edge id="26627" label="1010000000 (1) 1010000010" source="22543" target="22542" cy:directed="1"/>
      <edge id="26626" label="1010000000 (1) 1000000000" source="22543" target="22552" cy:directed="1"/>
      <edge id="26625" label="1010000000 (1) 1110000000" source="22543" target="22541" cy:directed="1"/>
      <edge id="26624" label="1010000010 (1) 1000000010" source="22542" target="22551" cy:directed="1"/>
      <edge id="26623" label="1010000010 (1) 1110000010" source="22542" target="22538" cy:directed="1"/>
      <edge id="26622" label="1110000000 (1) 1110000010" source="22541" target="22538" cy:directed="1"/>
      <edge id="26621" label="1110000000 (1) 1100000000" source="22541" target="22549" cy:directed="1"/>
      <edge id="26620" label="0010000000 (1) 0010000010" source="22540" target="22539" cy:directed="1"/>
      <edge id="26619" label="0010000000 (1) 0000000000" source="22540" target="22555" cy:directed="1"/>
      <edge id="26618" label="0010000010 (1) 0000000010" source="22539" target="22554" cy:directed="1"/>
      <edge id="26617" label="1110000010 (1) 1100000010" source="22538" target="22548" cy:directed="1"/>
      <edge id="26616" label="0110000000 (1) 0110000010" source="22537" target="22536" cy:directed="1"/>
      <edge id="26615" label="0110000000 (1) 0100000000" source="22537" target="22546" cy:directed="1"/>
      <edge id="26614" label="0110000000 (1) 0010000000" source="22537" target="22540" cy:directed="1"/>
      <edge id="26613" label="0110000010 (1) 0100000010" source="22536" target="22545" cy:directed="1"/>
      <edge id="26612" label="0110000010 (1) 0010000010" source="22536" target="22539" cy:directed="1"/>
      <edge id="26611" label="1001000010 (1) 1101000010" source="22534" target="22533" cy:directed="1"/>
      <edge id="26610" label="1101000010 (1) 1101100010" source="22533" target="22299" cy:directed="1"/>
      <edge id="26609" label="1101100000 (1) 1101110000" source="22532" target="22489" cy:directed="1"/>
      <edge id="26608" label="1101100000 (1) 1111100000" source="22532" target="22523" cy:directed="1"/>
      <edge id="26607" label="0101000010 (1) 0101100010" source="22531" target="22295" cy:directed="1"/>
      <edge id="26606" label="0101000010 (1) 0001000010" source="22531" target="22535" cy:directed="1"/>
      <edge id="26605" label="0101100000 (1) 0101110000" source="22530" target="22484" cy:directed="1"/>
      <edge id="26604" label="0101100000 (1) 0111100000" source="22530" target="22520" cy:directed="1"/>
      <edge id="26603" label="0101100000 (1) 0001100000" source="22530" target="22512" cy:directed="1"/>
      <edge id="26602" label="1011000000 (1) 1011000010" source="22529" target="22528" cy:directed="1"/>
      <edge id="26601" label="1011000000 (1) 1010000000" source="22529" target="22543" cy:directed="1"/>
      <edge id="26600" label="1011000000 (1) 1001000000" source="22529" target="22550" cy:directed="1"/>
      <edge id="26599" label="1011000000 (1) 1111000000" source="22529" target="22527" cy:directed="1"/>
      <edge id="26598" label="1011000010 (1) 1010000010" source="22528" target="22542" cy:directed="1"/>
      <edge id="26597" label="1011000010 (1) 1001000010" source="22528" target="22534" cy:directed="1"/>
      <edge id="26596" label="1011000010 (1) 1111000010" source="22528" target="22524" cy:directed="1"/>
      <edge id="26595" label="1111000000 (1) 1111000010" source="22527" target="22524" cy:directed="1"/>
      <edge id="26594" label="1111000000 (1) 1111100000" source="22527" target="22523" cy:directed="1"/>
      <edge id="26593" label="1111000000 (1) 1110000000" source="22527" target="22541" cy:directed="1"/>
      <edge id="26592" label="1111000000 (1) 1101000000" source="22527" target="22547" cy:directed="1"/>
      <edge id="26591" label="0011000000 (1) 0011000010" source="22526" target="22525" cy:directed="1"/>
      <edge id="26590" label="0011000000 (1) 0010000000" source="22526" target="22540" cy:directed="1"/>
      <edge id="26589" label="0011000000 (1) 0001000000" source="22526" target="22553" cy:directed="1"/>
      <edge id="26588" label="0011000010 (1) 0010000010" source="22525" target="22539" cy:directed="1"/>
      <edge id="26587" label="0011000010 (1) 0001000010" source="22525" target="22535" cy:directed="1"/>
      <edge id="26586" label="1111000010 (1) 1111100010" source="22524" target="22268" cy:directed="1"/>
      <edge id="26585" label="1111000010 (1) 1110000010" source="22524" target="22538" cy:directed="1"/>
      <edge id="26584" label="1111000010 (1) 1101000010" source="22524" target="22533" cy:directed="1"/>
      <edge id="26583" label="1111100000 (1) 1111110000" source="22523" target="22471" cy:directed="1"/>
      <edge id="26582" label="1111100000 (1) 1110100000" source="22523" target="22509" cy:directed="1"/>
      <edge id="26581" label="0111000000 (1) 0111000010" source="22522" target="22521" cy:directed="1"/>
      <edge id="26580" label="0111000000 (1) 0111100000" source="22522" target="22520" cy:directed="1"/>
      <edge id="26579" label="0111000000 (1) 0110000000" source="22522" target="22537" cy:directed="1"/>
      <edge id="26578" label="0111000000 (1) 0101000000" source="22522" target="22544" cy:directed="1"/>
      <edge id="26577" label="0111000000 (1) 0011000000" source="22522" target="22526" cy:directed="1"/>
      <edge id="26576" label="0111000010 (1) 0111100010" source="22521" target="22264" cy:directed="1"/>
      <edge id="26575" label="0111000010 (1) 0110000010" source="22521" target="22536" cy:directed="1"/>
      <edge id="26574" label="0111000010 (1) 0101000010" source="22521" target="22531" cy:directed="1"/>
      <edge id="26573" label="0111000010 (1) 0011000010" source="22521" target="22525" cy:directed="1"/>
      <edge id="26572" label="0111100000 (1) 0111110000" source="22520" target="22467" cy:directed="1"/>
      <edge id="26571" label="0111100000 (1) 0110100000" source="22520" target="22506" cy:directed="1"/>
      <edge id="26570" label="0111100000 (1) 0011100000" source="22520" target="22494" cy:directed="1"/>
      <edge id="26569" label="1000100000 (1) 1000110000" source="22519" target="22518" cy:directed="1"/>
      <edge id="26568" label="1000100000 (1) 1000000000" source="22519" target="22552" cy:directed="1"/>
      <edge id="26567" label="1000100000 (1) 1001100000" source="22519" target="22517" cy:directed="1"/>
      <edge id="26566" label="1000100000 (1) 1010100000" source="22519" target="22516" cy:directed="1"/>
      <edge id="26565" label="1000100000 (1) 1100100000" source="22519" target="22515" cy:directed="1"/>
      <edge id="26564" label="1000110000 (1) 1000111000" source="22518" target="22425" cy:directed="1"/>
      <edge id="26563" label="1000110000 (1) 1000010000" source="22518" target="22499" cy:directed="1"/>
      <edge id="26562" label="1000110000 (1) 1001110000" source="22518" target="22501" cy:directed="1"/>
      <edge id="26561" label="1000110000 (1) 1010110000" source="22518" target="22505" cy:directed="1"/>
      <edge id="26560" label="1001100000 (1) 1001110000" source="22517" target="22501" cy:directed="1"/>
      <edge id="26559" label="1001100000 (1) 1001000000" source="22517" target="22550" cy:directed="1"/>
      <edge id="26558" label="1001100000 (1) 1011100000" source="22517" target="22500" cy:directed="1"/>
      <edge id="26557" label="1001100000 (1) 1101100000" source="22517" target="22532" cy:directed="1"/>
      <edge id="26556" label="1010100000 (1) 1010110000" source="22516" target="22505" cy:directed="1"/>
      <edge id="26555" label="1010100000 (1) 1010000000" source="22516" target="22543" cy:directed="1"/>
      <edge id="26554" label="1010100000 (1) 1110100000" source="22516" target="22509" cy:directed="1"/>
      <edge id="26553" label="1100100000 (1) 1100110000" source="22515" target="22510" cy:directed="1"/>
      <edge id="26552" label="1100100000 (1) 1100000000" source="22515" target="22549" cy:directed="1"/>
      <edge id="26551" label="1100100000 (1) 1101100000" source="22515" target="22532" cy:directed="1"/>
      <edge id="26550" label="1100100000 (1) 1110100000" source="22515" target="22509" cy:directed="1"/>
      <edge id="26549" label="0000100000 (1) 0000110000" source="22514" target="22513" cy:directed="1"/>
      <edge id="26548" label="0000100000 (1) 0000000000" source="22514" target="22555" cy:directed="1"/>
      <edge id="26547" label="0000100000 (1) 0001100000" source="22514" target="22512" cy:directed="1"/>
      <edge id="26546" label="0000100000 (1) 0010100000" source="22514" target="22511" cy:directed="1"/>
      <edge id="26545" label="0000110000 (1) 0000111000" source="22513" target="22424" cy:directed="1"/>
      <edge id="26544" label="0000110000 (1) 0000010000" source="22513" target="22493" cy:directed="1"/>
      <edge id="26543" label="0000110000 (1) 0001110000" source="22513" target="22495" cy:directed="1"/>
      <edge id="26542" label="0000110000 (1) 0010110000" source="22513" target="22504" cy:directed="1"/>
      <edge id="26541" label="0001100000 (1) 0001110000" source="22512" target="22495" cy:directed="1"/>
      <edge id="26540" label="0001100000 (1) 0001000000" source="22512" target="22553" cy:directed="1"/>
      <edge id="26539" label="0001100000 (1) 0011100000" source="22512" target="22494" cy:directed="1"/>
      <edge id="26538" label="0010100000 (1) 0010110000" source="22511" target="22504" cy:directed="1"/>
      <edge id="26537" label="0010100000 (1) 0010000000" source="22511" target="22540" cy:directed="1"/>
      <edge id="26536" label="1100110000 (1) 1100111000" source="22510" target="22421" cy:directed="1"/>
      <edge id="26535" label="1100110000 (1) 1100010000" source="22510" target="22488" cy:directed="1"/>
      <edge id="26534" label="1100110000 (1) 1101110000" source="22510" target="22489" cy:directed="1"/>
      <edge id="26533" label="1100110000 (1) 1110110000" source="22510" target="22503" cy:directed="1"/>
      <edge id="26532" label="1100110000 (1) 1000110000" source="22510" target="22518" cy:directed="1"/>
      <edge id="26531" label="1110100000 (1) 1110110000" source="22509" target="22503" cy:directed="1"/>
      <edge id="26530" label="1110100000 (1) 1110000000" source="22509" target="22541" cy:directed="1"/>
      <edge id="26529" label="0100100000 (1) 0100110000" source="22508" target="22507" cy:directed="1"/>
      <edge id="26528" label="0100100000 (1) 0100000000" source="22508" target="22546" cy:directed="1"/>
      <edge id="26527" label="0100100000 (1) 0101100000" source="22508" target="22530" cy:directed="1"/>
      <edge id="26526" label="0100100000 (1) 0110100000" source="22508" target="22506" cy:directed="1"/>
      <edge id="26525" label="0100100000 (1) 0000100000" source="22508" target="22514" cy:directed="1"/>
      <edge id="26524" label="0100110000 (1) 0100111000" source="22507" target="22420" cy:directed="1"/>
      <edge id="26523" label="0100110000 (1) 0100010000" source="22507" target="22483" cy:directed="1"/>
      <edge id="26522" label="0100110000 (1) 0101110000" source="22507" target="22484" cy:directed="1"/>
      <edge id="26521" label="0100110000 (1) 0110110000" source="22507" target="22502" cy:directed="1"/>
      <edge id="26520" label="0100110000 (1) 0000110000" source="22507" target="22513" cy:directed="1"/>
      <edge id="26519" label="0110100000 (1) 0110110000" source="22506" target="22502" cy:directed="1"/>
      <edge id="26518" label="0110100000 (1) 0110000000" source="22506" target="22537" cy:directed="1"/>
      <edge id="26517" label="0110100000 (1) 0010100000" source="22506" target="22511" cy:directed="1"/>
      <edge id="26516" label="1010110000 (1) 1010111000" source="22505" target="22419" cy:directed="1"/>
      <edge id="26515" label="1010110000 (1) 1010010000" source="22505" target="22478" cy:directed="1"/>
      <edge id="26514" label="0010110000 (1) 0010111000" source="22504" target="22417" cy:directed="1"/>
      <edge id="26513" label="0010110000 (1) 0010010000" source="22504" target="22474" cy:directed="1"/>
      <edge id="26512" label="1110110000 (1) 1110111000" source="22503" target="22415" cy:directed="1"/>
      <edge id="26511" label="1110110000 (1) 1110010000" source="22503" target="22470" cy:directed="1"/>
      <edge id="26510" label="1110110000 (1) 1010110000" source="22503" target="22505" cy:directed="1"/>
      <edge id="26509" label="0110110000 (1) 0110111000" source="22502" target="22412" cy:directed="1"/>
      <edge id="26508" label="0110110000 (1) 0110010000" source="22502" target="22466" cy:directed="1"/>
      <edge id="26507" label="0110110000 (1) 0010110000" source="22502" target="22504" cy:directed="1"/>
      <edge id="26506" label="1001110000 (1) 1001111000" source="22501" target="22390" cy:directed="1"/>
      <edge id="26505" label="1001110000 (1) 1001010000" source="22501" target="22496" cy:directed="1"/>
      <edge id="26504" label="1001110000 (1) 1011110000" source="22501" target="22479" cy:directed="1"/>
      <edge id="26503" label="1011100000 (1) 1011110000" source="22500" target="22479" cy:directed="1"/>
      <edge id="26502" label="1011100000 (1) 1011000000" source="22500" target="22529" cy:directed="1"/>
      <edge id="26501" label="1011100000 (1) 1010100000" source="22500" target="22516" cy:directed="1"/>
      <edge id="26500" label="1011100000 (1) 1111100000" source="22500" target="22523" cy:directed="1"/>
      <edge id="26499" label="1000010000 (1) 1000010010" source="22499" target="22498" cy:directed="1"/>
      <edge id="26498" label="1000010000 (1) 1000011000" source="22499" target="22497" cy:directed="1"/>
      <edge id="26497" label="1000010000 (1) 1000000000" source="22499" target="22552" cy:directed="1"/>
      <edge id="26496" label="1000010000 (1) 1001010000" source="22499" target="22496" cy:directed="1"/>
      <edge id="26495" label="1000010010 (1) 1000000010" source="22498" target="22551" cy:directed="1"/>
      <edge id="26494" label="1000010010 (1) 1001010010" source="22498" target="22463" cy:directed="1"/>
      <edge id="26493" label="1000011000 (1) 1000011010" source="22497" target="22343" cy:directed="1"/>
      <edge id="26492" label="1000011000 (1) 1000011100" source="22497" target="22342" cy:directed="1"/>
      <edge id="26491" label="1000011000 (1) 1000001000" source="22497" target="22455" cy:directed="1"/>
      <edge id="26490" label="1000011000 (1) 1001011000" source="22497" target="22462" cy:directed="1"/>
      <edge id="26489" label="1001010000 (1) 1001010010" source="22496" target="22463" cy:directed="1"/>
      <edge id="26488" label="1001010000 (1) 1001011000" source="22496" target="22462" cy:directed="1"/>
      <edge id="26487" label="1001010000 (1) 1001000000" source="22496" target="22550" cy:directed="1"/>
      <edge id="26486" label="0001110000 (1) 0001111000" source="22495" target="22387" cy:directed="1"/>
      <edge id="26485" label="0001110000 (1) 0001010000" source="22495" target="22490" cy:directed="1"/>
      <edge id="26484" label="0001110000 (1) 0011110000" source="22495" target="22475" cy:directed="1"/>
      <edge id="26483" label="0011100000 (1) 0011110000" source="22494" target="22475" cy:directed="1"/>
      <edge id="26482" label="0011100000 (1) 0011000000" source="22494" target="22526" cy:directed="1"/>
      <edge id="26481" label="0011100000 (1) 0010100000" source="22494" target="22511" cy:directed="1"/>
      <edge id="26480" label="0000010000 (1) 0000010010" source="22493" target="22492" cy:directed="1"/>
      <edge id="26479" label="0000010000 (1) 0000011000" source="22493" target="22491" cy:directed="1"/>
      <edge id="26478" label="0000010000 (1) 0000000000" source="22493" target="22555" cy:directed="1"/>
      <edge id="26477" label="0000010000 (1) 0001010000" source="22493" target="22490" cy:directed="1"/>
      <edge id="26476" label="0000010010 (1) 0000000010" source="22492" target="22554" cy:directed="1"/>
      <edge id="26475" label="0000010010 (1) 0001010010" source="22492" target="22461" cy:directed="1"/>
      <edge id="26474" label="0000011000 (1) 0000011010" source="22491" target="22341" cy:directed="1"/>
      <edge id="26473" label="0000011000 (1) 0000011100" source="22491" target="22340" cy:directed="1"/>
      <edge id="26472" label="0000011000 (1) 0000001000" source="22491" target="22451" cy:directed="1"/>
      <edge id="26471" label="0000011000 (1) 0001011000" source="22491" target="22460" cy:directed="1"/>
      <edge id="26470" label="0001010000 (1) 0001010010" source="22490" target="22461" cy:directed="1"/>
      <edge id="26469" label="0001010000 (1) 0001011000" source="22490" target="22460" cy:directed="1"/>
      <edge id="26468" label="0001010000 (1) 0001000000" source="22490" target="22553" cy:directed="1"/>
      <edge id="26467" label="1101110000 (1) 1101111000" source="22489" target="22379" cy:directed="1"/>
      <edge id="26466" label="1101110000 (1) 1111110000" source="22489" target="22471" cy:directed="1"/>
      <edge id="26465" label="1101110000 (1) 1001110000" source="22489" target="22501" cy:directed="1"/>
      <edge id="26464" label="1100010000 (1) 1100010010" source="22488" target="22487" cy:directed="1"/>
      <edge id="26463" label="1100010000 (1) 1100011000" source="22488" target="22486" cy:directed="1"/>
      <edge id="26462" label="1100010000 (1) 1100000000" source="22488" target="22549" cy:directed="1"/>
      <edge id="26461" label="1100010000 (1) 1101010000" source="22488" target="22485" cy:directed="1"/>
      <edge id="26460" label="1100010000 (1) 1000010000" source="22488" target="22499" cy:directed="1"/>
      <edge id="26459" label="1100010010 (1) 1100000010" source="22487" target="22548" cy:directed="1"/>
      <edge id="26458" label="1100010010 (1) 1101010010" source="22487" target="22459" cy:directed="1"/>
      <edge id="26457" label="1100010010 (1) 1000010010" source="22487" target="22498" cy:directed="1"/>
      <edge id="26456" label="1100011000 (1) 1100011010" source="22486" target="22337" cy:directed="1"/>
      <edge id="26455" label="1100011000 (1) 1100011100" source="22486" target="22336" cy:directed="1"/>
      <edge id="26454" label="1100011000 (1) 1100001000" source="22486" target="22452" cy:directed="1"/>
      <edge id="26453" label="1100011000 (1) 1101011000" source="22486" target="22458" cy:directed="1"/>
      <edge id="26452" label="1100011000 (1) 1000011000" source="22486" target="22497" cy:directed="1"/>
      <edge id="26451" label="1101010000 (1) 1101010010" source="22485" target="22459" cy:directed="1"/>
      <edge id="26450" label="1101010000 (1) 1101011000" source="22485" target="22458" cy:directed="1"/>
      <edge id="26449" label="1101010000 (1) 1101000000" source="22485" target="22547" cy:directed="1"/>
      <edge id="26448" label="1101010000 (1) 1101110000" source="22485" target="22489" cy:directed="1"/>
      <edge id="26447" label="1101010000 (1) 1001010000" source="22485" target="22496" cy:directed="1"/>
      <edge id="26446" label="0101110000 (1) 0101111000" source="22484" target="22378" cy:directed="1"/>
      <edge id="26445" label="0101110000 (1) 0111110000" source="22484" target="22467" cy:directed="1"/>
      <edge id="26444" label="0101110000 (1) 0001110000" source="22484" target="22495" cy:directed="1"/>
      <edge id="26443" label="0100010000 (1) 0100010010" source="22483" target="22482" cy:directed="1"/>
      <edge id="26442" label="0100010000 (1) 0100011000" source="22483" target="22481" cy:directed="1"/>
      <edge id="26441" label="0100010000 (1) 0100000000" source="22483" target="22546" cy:directed="1"/>
      <edge id="26440" label="0100010000 (1) 0101010000" source="22483" target="22480" cy:directed="1"/>
      <edge id="26439" label="0100010000 (1) 0000010000" source="22483" target="22493" cy:directed="1"/>
      <edge id="26438" label="0100010010 (1) 0100000010" source="22482" target="22545" cy:directed="1"/>
      <edge id="26437" label="0100010010 (1) 0101010010" source="22482" target="22457" cy:directed="1"/>
      <edge id="26436" label="0100010010 (1) 0000010010" source="22482" target="22492" cy:directed="1"/>
      <edge id="26435" label="0100011000 (1) 0100011010" source="22481" target="22332" cy:directed="1"/>
      <edge id="26434" label="0100011000 (1) 0100011100" source="22481" target="22331" cy:directed="1"/>
      <edge id="26433" label="0100011000 (1) 0100001000" source="22481" target="22446" cy:directed="1"/>
      <edge id="26432" label="0100011000 (1) 0101011000" source="22481" target="22456" cy:directed="1"/>
      <edge id="26431" label="0100011000 (1) 0000011000" source="22481" target="22491" cy:directed="1"/>
      <edge id="26430" label="0101010000 (1) 0101010010" source="22480" target="22457" cy:directed="1"/>
      <edge id="26429" label="0101010000 (1) 0101011000" source="22480" target="22456" cy:directed="1"/>
      <edge id="26428" label="0101010000 (1) 0101000000" source="22480" target="22544" cy:directed="1"/>
      <edge id="26427" label="0101010000 (1) 0101110000" source="22480" target="22484" cy:directed="1"/>
      <edge id="26426" label="0101010000 (1) 0001010000" source="22480" target="22490" cy:directed="1"/>
      <edge id="26425" label="1011110000 (1) 1011111000" source="22479" target="22360" cy:directed="1"/>
      <edge id="26424" label="1011110000 (1) 1011010000" source="22479" target="22443" cy:directed="1"/>
      <edge id="26423" label="1011110000 (1) 1010110000" source="22479" target="22505" cy:directed="1"/>
      <edge id="26422" label="1010010000 (1) 1010010010" source="22478" target="22477" cy:directed="1"/>
      <edge id="26421" label="1010010000 (1) 1010011000" source="22478" target="22476" cy:directed="1"/>
      <edge id="26420" label="1010010000 (1) 1010000000" source="22478" target="22543" cy:directed="1"/>
      <edge id="26419" label="1010010000 (1) 1000010000" source="22478" target="22499" cy:directed="1"/>
      <edge id="26418" label="1010010010 (1) 1010000010" source="22477" target="22542" cy:directed="1"/>
      <edge id="26417" label="1010010010 (1) 1000010010" source="22477" target="22498" cy:directed="1"/>
      <edge id="26416" label="1010011000 (1) 1010011010" source="22476" target="22323" cy:directed="1"/>
      <edge id="26415" label="1010011000 (1) 1010011100" source="22476" target="22322" cy:directed="1"/>
      <edge id="26414" label="1010011000 (1) 1010001000" source="22476" target="22431" cy:directed="1"/>
      <edge id="26413" label="1010011000 (1) 1000011000" source="22476" target="22497" cy:directed="1"/>
      <edge id="26412" label="0011110000 (1) 0011111000" source="22475" target="22359" cy:directed="1"/>
      <edge id="26411" label="0011110000 (1) 0011010000" source="22475" target="22440" cy:directed="1"/>
      <edge id="26410" label="0011110000 (1) 0010110000" source="22475" target="22504" cy:directed="1"/>
      <edge id="26409" label="0010010000 (1) 0010010010" source="22474" target="22473" cy:directed="1"/>
      <edge id="26408" label="0010010000 (1) 0010011000" source="22474" target="22472" cy:directed="1"/>
      <edge id="26407" label="0010010000 (1) 0010000000" source="22474" target="22540" cy:directed="1"/>
      <edge id="26406" label="0010010000 (1) 0000010000" source="22474" target="22493" cy:directed="1"/>
      <edge id="26405" label="0010010010 (1) 0010000010" source="22473" target="22539" cy:directed="1"/>
      <edge id="26404" label="0010010010 (1) 0000010010" source="22473" target="22492" cy:directed="1"/>
      <edge id="26403" label="0010011000 (1) 0010011010" source="22472" target="22320" cy:directed="1"/>
      <edge id="26402" label="0010011000 (1) 0010011100" source="22472" target="22319" cy:directed="1"/>
      <edge id="26401" label="0010011000 (1) 0010001000" source="22472" target="22428" cy:directed="1"/>
      <edge id="26400" label="0010011000 (1) 0000011000" source="22472" target="22491" cy:directed="1"/>
      <edge id="26399" label="1111110000 (1) 1111111000" source="22471" target="22355" cy:directed="1"/>
      <edge id="26398" label="1111110000 (1) 1110110000" source="22471" target="22503" cy:directed="1"/>
      <edge id="26397" label="1111110000 (1) 1011110000" source="22471" target="22479" cy:directed="1"/>
      <edge id="26396" label="1110010000 (1) 1110010010" source="22470" target="22469" cy:directed="1"/>
      <edge id="26395" label="1110010000 (1) 1110011000" source="22470" target="22468" cy:directed="1"/>
      <edge id="26394" label="1110010000 (1) 1110000000" source="22470" target="22541" cy:directed="1"/>
      <edge id="26393" label="1110010000 (1) 1100010000" source="22470" target="22488" cy:directed="1"/>
      <edge id="26392" label="1110010000 (1) 1010010000" source="22470" target="22478" cy:directed="1"/>
      <edge id="26391" label="1110010010 (1) 1110000010" source="22469" target="22538" cy:directed="1"/>
      <edge id="26390" label="1110010010 (1) 1100010010" source="22469" target="22487" cy:directed="1"/>
      <edge id="26389" label="1110010010 (1) 1010010010" source="22469" target="22477" cy:directed="1"/>
      <edge id="26388" label="1110011000 (1) 1110011010" source="22468" target="22317" cy:directed="1"/>
      <edge id="26387" label="1110011000 (1) 1110011100" source="22468" target="22316" cy:directed="1"/>
      <edge id="26386" label="1110011000 (1) 1110001000" source="22468" target="22429" cy:directed="1"/>
      <edge id="26385" label="1110011000 (1) 1100011000" source="22468" target="22486" cy:directed="1"/>
      <edge id="26384" label="1110011000 (1) 1010011000" source="22468" target="22476" cy:directed="1"/>
      <edge id="26383" label="0111110000 (1) 0111111000" source="22467" target="22354" cy:directed="1"/>
      <edge id="26382" label="0111110000 (1) 0110110000" source="22467" target="22502" cy:directed="1"/>
      <edge id="26381" label="0111110000 (1) 0011110000" source="22467" target="22475" cy:directed="1"/>
      <edge id="26380" label="0110010000 (1) 0110010010" source="22466" target="22465" cy:directed="1"/>
      <edge id="26379" label="0110010000 (1) 0110011000" source="22466" target="22464" cy:directed="1"/>
      <edge id="26378" label="0110010000 (1) 0110000000" source="22466" target="22537" cy:directed="1"/>
      <edge id="26377" label="0110010000 (1) 0100010000" source="22466" target="22483" cy:directed="1"/>
      <edge id="26376" label="0110010000 (1) 0010010000" source="22466" target="22474" cy:directed="1"/>
      <edge id="26375" label="0110010010 (1) 0110000010" source="22465" target="22536" cy:directed="1"/>
      <edge id="26374" label="0110010010 (1) 0100010010" source="22465" target="22482" cy:directed="1"/>
      <edge id="26373" label="0110010010 (1) 0010010010" source="22465" target="22473" cy:directed="1"/>
      <edge id="26372" label="0110011000 (1) 0110011010" source="22464" target="22314" cy:directed="1"/>
      <edge id="26371" label="0110011000 (1) 0110011100" source="22464" target="22313" cy:directed="1"/>
      <edge id="26370" label="0110011000 (1) 0110001000" source="22464" target="22423" cy:directed="1"/>
      <edge id="26369" label="0110011000 (1) 0100011000" source="22464" target="22481" cy:directed="1"/>
      <edge id="26368" label="0110011000 (1) 0010011000" source="22464" target="22472" cy:directed="1"/>
      <edge id="26367" label="1001010010 (1) 1001000010" source="22463" target="22534" cy:directed="1"/>
      <edge id="26366" label="1001011000 (1) 1001011010" source="22462" target="22308" cy:directed="1"/>
      <edge id="26365" label="1001011000 (1) 1001011100" source="22462" target="22307" cy:directed="1"/>
      <edge id="26364" label="1001011000 (1) 1001001000" source="22462" target="22453" cy:directed="1"/>
      <edge id="26363" label="0001010010 (1) 0001000010" source="22461" target="22535" cy:directed="1"/>
      <edge id="26362" label="0001011000 (1) 0001011010" source="22460" target="22306" cy:directed="1"/>
      <edge id="26361" label="0001011000 (1) 0001011100" source="22460" target="22305" cy:directed="1"/>
      <edge id="26360" label="0001011000 (1) 0001001000" source="22460" target="22449" cy:directed="1"/>
      <edge id="26359" label="1101010010 (1) 1101000010" source="22459" target="22533" cy:directed="1"/>
      <edge id="26358" label="1101010010 (1) 1101110010" source="22459" target="22167" cy:directed="1"/>
      <edge id="26357" label="1101010010 (1) 1001010010" source="22459" target="22463" cy:directed="1"/>
      <edge id="26356" label="1101011000 (1) 1101011010" source="22458" target="22303" cy:directed="1"/>
      <edge id="26355" label="1101011000 (1) 1101011100" source="22458" target="22302" cy:directed="1"/>
      <edge id="26354" label="1101011000 (1) 1101001000" source="22458" target="22447" cy:directed="1"/>
      <edge id="26353" label="1101011000 (1) 1101111000" source="22458" target="22379" cy:directed="1"/>
      <edge id="26352" label="1101011000 (1) 1001011000" source="22458" target="22462" cy:directed="1"/>
      <edge id="26351" label="0101010010 (1) 0101000010" source="22457" target="22531" cy:directed="1"/>
      <edge id="26350" label="0101010010 (1) 0101110010" source="22457" target="22161" cy:directed="1"/>
      <edge id="26349" label="0101010010 (1) 0001010010" source="22457" target="22461" cy:directed="1"/>
      <edge id="26348" label="0101011000 (1) 0101011010" source="22456" target="22301" cy:directed="1"/>
      <edge id="26347" label="0101011000 (1) 0101011100" source="22456" target="22300" cy:directed="1"/>
      <edge id="26346" label="0101011000 (1) 0101001000" source="22456" target="22444" cy:directed="1"/>
      <edge id="26345" label="0101011000 (1) 0101111000" source="22456" target="22378" cy:directed="1"/>
      <edge id="26344" label="0101011000 (1) 0001011000" source="22456" target="22460" cy:directed="1"/>
      <edge id="26343" label="1000001000 (1) 1000001010" source="22455" target="22454" cy:directed="1"/>
      <edge id="26342" label="1000001000 (1) 1000000000" source="22455" target="22552" cy:directed="1"/>
      <edge id="26341" label="1000001000 (1) 1001001000" source="22455" target="22453" cy:directed="1"/>
      <edge id="26340" label="1000001000 (1) 1100001000" source="22455" target="22452" cy:directed="1"/>
      <edge id="26339" label="1000001010 (1) 1000000010" source="22454" target="22551" cy:directed="1"/>
      <edge id="26338" label="1000001010 (1) 1001001010" source="22454" target="22418" cy:directed="1"/>
      <edge id="26337" label="1000001010 (1) 1100001010" source="22454" target="22448" cy:directed="1"/>
      <edge id="26336" label="1001001000 (1) 1001001010" source="22453" target="22418" cy:directed="1"/>
      <edge id="26335" label="1001001000 (1) 1001000000" source="22453" target="22550" cy:directed="1"/>
      <edge id="26334" label="1001001000 (1) 1101001000" source="22453" target="22447" cy:directed="1"/>
      <edge id="26333" label="1100001000 (1) 1100001010" source="22452" target="22448" cy:directed="1"/>
      <edge id="26332" label="1100001000 (1) 1100000000" source="22452" target="22549" cy:directed="1"/>
      <edge id="26331" label="1100001000 (1) 1101001000" source="22452" target="22447" cy:directed="1"/>
      <edge id="26330" label="0000001000 (1) 0000001010" source="22451" target="22450" cy:directed="1"/>
      <edge id="26329" label="0000001000 (1) 0000000000" source="22451" target="22555" cy:directed="1"/>
      <edge id="26328" label="0000001000 (1) 0001001000" source="22451" target="22449" cy:directed="1"/>
      <edge id="26327" label="0000001010 (1) 0000000010" source="22450" target="22554" cy:directed="1"/>
      <edge id="26326" label="0000001010 (1) 0001001010" source="22450" target="22416" cy:directed="1"/>
      <edge id="26325" label="0001001000 (1) 0001001010" source="22449" target="22416" cy:directed="1"/>
      <edge id="26324" label="0001001000 (1) 0001000000" source="22449" target="22553" cy:directed="1"/>
      <edge id="26323" label="1100001010 (1) 1100000010" source="22448" target="22548" cy:directed="1"/>
      <edge id="26322" label="1100001010 (1) 1101001010" source="22448" target="22414" cy:directed="1"/>
      <edge id="26321" label="1101001000 (1) 1101001010" source="22447" target="22414" cy:directed="1"/>
      <edge id="26320" label="1101001000 (1) 1101000000" source="22447" target="22547" cy:directed="1"/>
      <edge id="26319" label="1101001000 (1) 1101101000" source="22447" target="22413" cy:directed="1"/>
      <edge id="26318" label="0100001000 (1) 0100001010" source="22446" target="22445" cy:directed="1"/>
      <edge id="26317" label="0100001000 (1) 0100000000" source="22446" target="22546" cy:directed="1"/>
      <edge id="26316" label="0100001000 (1) 0101001000" source="22446" target="22444" cy:directed="1"/>
      <edge id="26315" label="0100001000 (1) 0000001000" source="22446" target="22451" cy:directed="1"/>
      <edge id="26314" label="0100001010 (1) 0100000010" source="22445" target="22545" cy:directed="1"/>
      <edge id="26313" label="0100001010 (1) 0101001010" source="22445" target="22411" cy:directed="1"/>
      <edge id="26312" label="0100001010 (1) 0000001010" source="22445" target="22450" cy:directed="1"/>
      <edge id="26311" label="0101001000 (1) 0101001010" source="22444" target="22411" cy:directed="1"/>
      <edge id="26310" label="0101001000 (1) 0101000000" source="22444" target="22544" cy:directed="1"/>
      <edge id="26309" label="0101001000 (1) 0101101000" source="22444" target="22410" cy:directed="1"/>
      <edge id="26308" label="0101001000 (1) 0001001000" source="22444" target="22449" cy:directed="1"/>
      <edge id="26307" label="1011010000 (1) 1011010010" source="22443" target="22442" cy:directed="1"/>
      <edge id="26306" label="1011010000 (1) 1011011000" source="22443" target="22441" cy:directed="1"/>
      <edge id="26305" label="1011010000 (1) 1011000000" source="22443" target="22529" cy:directed="1"/>
      <edge id="26304" label="1011010000 (1) 1010010000" source="22443" target="22478" cy:directed="1"/>
      <edge id="26303" label="1011010000 (1) 1001010000" source="22443" target="22496" cy:directed="1"/>
      <edge id="26302" label="1011010010 (1) 1011000010" source="22442" target="22528" cy:directed="1"/>
      <edge id="26301" label="1011010010 (1) 1010010010" source="22442" target="22477" cy:directed="1"/>
      <edge id="26300" label="1011010010 (1) 1001010010" source="22442" target="22463" cy:directed="1"/>
      <edge id="26299" label="1011011000 (1) 1011011010" source="22441" target="22297" cy:directed="1"/>
      <edge id="26298" label="1011011000 (1) 1011011100" source="22441" target="22296" cy:directed="1"/>
      <edge id="26297" label="1011011000 (1) 1011001000" source="22441" target="22409" cy:directed="1"/>
      <edge id="26296" label="1011011000 (1) 1010011000" source="22441" target="22476" cy:directed="1"/>
      <edge id="26295" label="1011011000 (1) 1001011000" source="22441" target="22462" cy:directed="1"/>
      <edge id="26294" label="0011010000 (1) 0011010010" source="22440" target="22439" cy:directed="1"/>
      <edge id="26293" label="0011010000 (1) 0011011000" source="22440" target="22438" cy:directed="1"/>
      <edge id="26292" label="0011010000 (1) 0011000000" source="22440" target="22526" cy:directed="1"/>
      <edge id="26291" label="0011010000 (1) 0010010000" source="22440" target="22474" cy:directed="1"/>
      <edge id="26290" label="0011010000 (1) 0001010000" source="22440" target="22490" cy:directed="1"/>
      <edge id="26289" label="0011010010 (1) 0011000010" source="22439" target="22525" cy:directed="1"/>
      <edge id="26288" label="0011010010 (1) 0010010010" source="22439" target="22473" cy:directed="1"/>
      <edge id="26287" label="0011010010 (1) 0001010010" source="22439" target="22461" cy:directed="1"/>
      <edge id="26286" label="0011011000 (1) 0011011010" source="22438" target="22293" cy:directed="1"/>
      <edge id="26285" label="0011011000 (1) 0011011100" source="22438" target="22292" cy:directed="1"/>
      <edge id="26284" label="0011011000 (1) 0011001000" source="22438" target="22400" cy:directed="1"/>
      <edge id="26283" label="0011011000 (1) 0010011000" source="22438" target="22472" cy:directed="1"/>
      <edge id="26282" label="0011011000 (1) 0001011000" source="22438" target="22460" cy:directed="1"/>
      <edge id="26281" label="0111010000 (1) 0111010010" source="22437" target="22436" cy:directed="1"/>
      <edge id="26280" label="0111010000 (1) 0111011000" source="22437" target="22435" cy:directed="1"/>
      <edge id="26279" label="0111010000 (1) 0111000000" source="22437" target="22522" cy:directed="1"/>
      <edge id="26278" label="0111010000 (1) 0111110000" source="22437" target="22467" cy:directed="1"/>
      <edge id="26277" label="0111010000 (1) 0110010000" source="22437" target="22466" cy:directed="1"/>
      <edge id="26276" label="0111010000 (1) 0101010000" source="22437" target="22480" cy:directed="1"/>
      <edge id="26275" label="0111010000 (1) 0011010000" source="22437" target="22440" cy:directed="1"/>
      <edge id="26274" label="0111010010 (1) 0111000010" source="22436" target="22521" cy:directed="1"/>
      <edge id="26273" label="0111010010 (1) 0111110010" source="22436" target="22139" cy:directed="1"/>
      <edge id="26272" label="0111010010 (1) 0110010010" source="22436" target="22465" cy:directed="1"/>
      <edge id="26271" label="0111010010 (1) 0101010010" source="22436" target="22457" cy:directed="1"/>
      <edge id="26270" label="0111010010 (1) 0011010010" source="22436" target="22439" cy:directed="1"/>
      <edge id="26269" label="0111011000 (1) 0111011010" source="22435" target="22281" cy:directed="1"/>
      <edge id="26268" label="0111011000 (1) 0111011100" source="22435" target="22280" cy:directed="1"/>
      <edge id="26267" label="0111011000 (1) 0111001000" source="22435" target="22382" cy:directed="1"/>
      <edge id="26266" label="0111011000 (1) 0111111000" source="22435" target="22354" cy:directed="1"/>
      <edge id="26265" label="0111011000 (1) 0110011000" source="22435" target="22464" cy:directed="1"/>
      <edge id="26264" label="0111011000 (1) 0101011000" source="22435" target="22456" cy:directed="1"/>
      <edge id="26263" label="0111011000 (1) 0011011000" source="22435" target="22438" cy:directed="1"/>
      <edge id="26262" label="1111010000 (1) 1111010010" source="22434" target="22433" cy:directed="1"/>
      <edge id="26261" label="1111010000 (1) 1111011000" source="22434" target="22432" cy:directed="1"/>
      <edge id="26260" label="1111010000 (1) 1111000000" source="22434" target="22527" cy:directed="1"/>
      <edge id="26259" label="1111010000 (1) 1111110000" source="22434" target="22471" cy:directed="1"/>
      <edge id="26258" label="1111010000 (1) 1110010000" source="22434" target="22470" cy:directed="1"/>
      <edge id="26257" label="1111010000 (1) 1101010000" source="22434" target="22485" cy:directed="1"/>
      <edge id="26256" label="1111010000 (1) 1011010000" source="22434" target="22443" cy:directed="1"/>
      <edge id="26255" label="1111010010 (1) 1111000010" source="22433" target="22524" cy:directed="1"/>
      <edge id="26254" label="1111010010 (1) 1111110010" source="22433" target="22144" cy:directed="1"/>
      <edge id="26253" label="1111010010 (1) 1110010010" source="22433" target="22469" cy:directed="1"/>
      <edge id="26252" label="1111010010 (1) 1101010010" source="22433" target="22459" cy:directed="1"/>
      <edge id="26251" label="1111010010 (1) 1011010010" source="22433" target="22442" cy:directed="1"/>
      <edge id="26250" label="1111011000 (1) 1111011010" source="22432" target="22279" cy:directed="1"/>
      <edge id="26249" label="1111011000 (1) 1111011100" source="22432" target="22278" cy:directed="1"/>
      <edge id="26248" label="1111011000 (1) 1111001000" source="22432" target="22407" cy:directed="1"/>
      <edge id="26247" label="1111011000 (1) 1111111000" source="22432" target="22355" cy:directed="1"/>
      <edge id="26246" label="1111011000 (1) 1110011000" source="22432" target="22468" cy:directed="1"/>
      <edge id="26245" label="1111011000 (1) 1101011000" source="22432" target="22458" cy:directed="1"/>
      <edge id="26244" label="1111011000 (1) 1011011000" source="22432" target="22441" cy:directed="1"/>
      <edge id="26243" label="1010001000 (1) 1010001010" source="22431" target="22430" cy:directed="1"/>
      <edge id="26242" label="1010001000 (1) 1010000000" source="22431" target="22543" cy:directed="1"/>
      <edge id="26241" label="1010001000 (1) 1000001000" source="22431" target="22455" cy:directed="1"/>
      <edge id="26240" label="1010001000 (1) 1110001000" source="22431" target="22429" cy:directed="1"/>
      <edge id="26239" label="1010001010 (1) 1010000010" source="22430" target="22542" cy:directed="1"/>
      <edge id="26238" label="1010001010 (1) 1000001010" source="22430" target="22454" cy:directed="1"/>
      <edge id="26237" label="1010001010 (1) 1110001010" source="22430" target="22426" cy:directed="1"/>
      <edge id="26236" label="1110001000 (1) 1110001010" source="22429" target="22426" cy:directed="1"/>
      <edge id="26235" label="1110001000 (1) 1110000000" source="22429" target="22541" cy:directed="1"/>
      <edge id="26234" label="1110001000 (1) 1100001000" source="22429" target="22452" cy:directed="1"/>
      <edge id="26233" label="0010001000 (1) 0010001010" source="22428" target="22427" cy:directed="1"/>
      <edge id="26232" label="0010001000 (1) 0010000000" source="22428" target="22540" cy:directed="1"/>
      <edge id="26231" label="0010001000 (1) 0000001000" source="22428" target="22451" cy:directed="1"/>
      <edge id="26230" label="0010001010 (1) 0010000010" source="22427" target="22539" cy:directed="1"/>
      <edge id="26229" label="0010001010 (1) 0000001010" source="22427" target="22450" cy:directed="1"/>
      <edge id="26228" label="1110001010 (1) 1110000010" source="22426" target="22538" cy:directed="1"/>
      <edge id="26227" label="1110001010 (1) 1100001010" source="22426" target="22448" cy:directed="1"/>
      <edge id="26226" label="1000111000 (1) 1000111100" source="22425" target="22271" cy:directed="1"/>
      <edge id="26225" label="1000111000 (1) 1000011000" source="22425" target="22497" cy:directed="1"/>
      <edge id="26224" label="1000111000 (1) 1001111000" source="22425" target="22390" cy:directed="1"/>
      <edge id="26223" label="1000111000 (1) 1010111000" source="22425" target="22419" cy:directed="1"/>
      <edge id="26222" label="0000111000 (1) 0000111100" source="22424" target="22270" cy:directed="1"/>
      <edge id="26221" label="0000111000 (1) 0000011000" source="22424" target="22491" cy:directed="1"/>
      <edge id="26220" label="0000111000 (1) 0001111000" source="22424" target="22387" cy:directed="1"/>
      <edge id="26219" label="0000111000 (1) 0010111000" source="22424" target="22417" cy:directed="1"/>
      <edge id="26218" label="0110001000 (1) 0110001010" source="22423" target="22422" cy:directed="1"/>
      <edge id="26217" label="0110001000 (1) 0110000000" source="22423" target="22537" cy:directed="1"/>
      <edge id="26216" label="0110001000 (1) 0100001000" source="22423" target="22446" cy:directed="1"/>
      <edge id="26215" label="0110001000 (1) 0010001000" source="22423" target="22428" cy:directed="1"/>
      <edge id="26214" label="0110001010 (1) 0110000010" source="22422" target="22536" cy:directed="1"/>
      <edge id="26213" label="0110001010 (1) 0100001010" source="22422" target="22445" cy:directed="1"/>
      <edge id="26212" label="0110001010 (1) 0010001010" source="22422" target="22427" cy:directed="1"/>
      <edge id="26211" label="1100111000 (1) 1100111100" source="22421" target="22269" cy:directed="1"/>
      <edge id="26210" label="1100111000 (1) 1100011000" source="22421" target="22486" cy:directed="1"/>
      <edge id="26209" label="1100111000 (1) 1101111000" source="22421" target="22379" cy:directed="1"/>
      <edge id="26208" label="1100111000 (1) 1110111000" source="22421" target="22415" cy:directed="1"/>
      <edge id="26207" label="1100111000 (1) 1000111000" source="22421" target="22425" cy:directed="1"/>
      <edge id="26206" label="0100111000 (1) 0100111100" source="22420" target="22266" cy:directed="1"/>
      <edge id="26205" label="0100111000 (1) 0100011000" source="22420" target="22481" cy:directed="1"/>
      <edge id="26204" label="0100111000 (1) 0101111000" source="22420" target="22378" cy:directed="1"/>
      <edge id="26203" label="0100111000 (1) 0110111000" source="22420" target="22412" cy:directed="1"/>
      <edge id="26202" label="0100111000 (1) 0000111000" source="22420" target="22424" cy:directed="1"/>
      <edge id="26201" label="1010111000 (1) 1010111100" source="22419" target="22246" cy:directed="1"/>
      <edge id="26200" label="1010111000 (1) 1010011000" source="22419" target="22476" cy:directed="1"/>
      <edge id="26199" label="1001001010 (1) 1001000010" source="22418" target="22534" cy:directed="1"/>
      <edge id="26198" label="1001001010 (1) 1101001010" source="22418" target="22414" cy:directed="1"/>
      <edge id="26197" label="0010111000 (1) 0010111100" source="22417" target="22243" cy:directed="1"/>
      <edge id="26196" label="0010111000 (1) 0010011000" source="22417" target="22472" cy:directed="1"/>
      <edge id="26195" label="0001001010 (1) 0001000010" source="22416" target="22535" cy:directed="1"/>
      <edge id="26194" label="1110111000 (1) 1110111100" source="22415" target="22230" cy:directed="1"/>
      <edge id="26193" label="1110111000 (1) 1110011000" source="22415" target="22468" cy:directed="1"/>
      <edge id="26192" label="1110111000 (1) 1010111000" source="22415" target="22419" cy:directed="1"/>
      <edge id="26191" label="1101001010 (1) 1101000010" source="22414" target="22533" cy:directed="1"/>
      <edge id="26190" label="1101001010 (1) 1101101010" source="22414" target="22048" cy:directed="1"/>
      <edge id="26189" label="1101101000 (1) 1101100000" source="22413" target="22532" cy:directed="1"/>
      <edge id="26188" label="1101101000 (1) 1101111000" source="22413" target="22379" cy:directed="1"/>
      <edge id="26187" label="1101101000 (1) 1111101000" source="22413" target="22388" cy:directed="1"/>
      <edge id="26186" label="0110111000 (1) 0110111100" source="22412" target="22229" cy:directed="1"/>
      <edge id="26185" label="0110111000 (1) 0110011000" source="22412" target="22464" cy:directed="1"/>
      <edge id="26184" label="0110111000 (1) 0010111000" source="22412" target="22417" cy:directed="1"/>
      <edge id="26183" label="0101001010 (1) 0101000010" source="22411" target="22531" cy:directed="1"/>
      <edge id="26182" label="0101001010 (1) 0101101010" source="22411" target="22047" cy:directed="1"/>
      <edge id="26181" label="0101001010 (1) 0001001010" source="22411" target="22416" cy:directed="1"/>
      <edge id="26180" label="0101101000 (1) 0101100000" source="22410" target="22530" cy:directed="1"/>
      <edge id="26179" label="0101101000 (1) 0101111000" source="22410" target="22378" cy:directed="1"/>
      <edge id="26178" label="0101101000 (1) 0111101000" source="22410" target="22380" cy:directed="1"/>
      <edge id="26177" label="0101101000 (1) 0001101000" source="22410" target="22376" cy:directed="1"/>
      <edge id="26176" label="1011001000 (1) 1011001010" source="22409" target="22408" cy:directed="1"/>
      <edge id="26175" label="1011001000 (1) 1011000000" source="22409" target="22529" cy:directed="1"/>
      <edge id="26174" label="1011001000 (1) 1010001000" source="22409" target="22431" cy:directed="1"/>
      <edge id="26173" label="1011001000 (1) 1001001000" source="22409" target="22453" cy:directed="1"/>
      <edge id="26172" label="1011001000 (1) 1111001000" source="22409" target="22407" cy:directed="1"/>
      <edge id="26171" label="1011001010 (1) 1011000010" source="22408" target="22528" cy:directed="1"/>
      <edge id="26170" label="1011001010 (1) 1010001010" source="22408" target="22430" cy:directed="1"/>
      <edge id="26169" label="1011001010 (1) 1001001010" source="22408" target="22418" cy:directed="1"/>
      <edge id="26168" label="1011001010 (1) 1111001010" source="22408" target="22389" cy:directed="1"/>
      <edge id="26167" label="1111001000 (1) 1111001010" source="22407" target="22389" cy:directed="1"/>
      <edge id="26166" label="1111001000 (1) 1111000000" source="22407" target="22527" cy:directed="1"/>
      <edge id="26165" label="1111001000 (1) 1111101000" source="22407" target="22388" cy:directed="1"/>
      <edge id="26164" label="1111001000 (1) 1110001000" source="22407" target="22429" cy:directed="1"/>
      <edge id="26163" label="1111001000 (1) 1101001000" source="22407" target="22447" cy:directed="1"/>
      <edge id="26162" label="1000000100 (1) 1000000110" source="22406" target="22405" cy:directed="1"/>
      <edge id="26161" label="1000000100 (1) 1000000000" source="22406" target="22552" cy:directed="1"/>
      <edge id="26160" label="1000000100 (1) 1000100100" source="22406" target="22404" cy:directed="1"/>
      <edge id="26159" label="1000000100 (1) 1001000100" source="22406" target="22403" cy:directed="1"/>
      <edge id="26158" label="1000000100 (1) 1010000100" source="22406" target="22402" cy:directed="1"/>
      <edge id="26157" label="1000000100 (1) 1100000100" source="22406" target="22401" cy:directed="1"/>
      <edge id="26156" label="1000000110 (1) 1000000010" source="22405" target="22551" cy:directed="1"/>
      <edge id="26155" label="1000000110 (1) 1000100110" source="22405" target="22017" cy:directed="1"/>
      <edge id="26154" label="1000000110 (1) 1001000110" source="22405" target="22353" cy:directed="1"/>
      <edge id="26153" label="1000000110 (1) 1010000110" source="22405" target="22370" cy:directed="1"/>
      <edge id="26152" label="1000000110 (1) 1100000110" source="22405" target="22393" cy:directed="1"/>
      <edge id="26151" label="1000100100 (1) 1000100000" source="22404" target="22519" cy:directed="1"/>
      <edge id="26150" label="1000100100 (1) 1000110100" source="22404" target="22321" cy:directed="1"/>
      <edge id="26149" label="1000100100 (1) 1001100100" source="22404" target="22352" cy:directed="1"/>
      <edge id="26148" label="1000100100 (1) 1010100100" source="22404" target="22369" cy:directed="1"/>
      <edge id="26147" label="1000100100 (1) 1100100100" source="22404" target="22392" cy:directed="1"/>
      <edge id="26146" label="1001000100 (1) 1001000110" source="22403" target="22353" cy:directed="1"/>
      <edge id="26145" label="1001000100 (1) 1001000000" source="22403" target="22550" cy:directed="1"/>
      <edge id="26144" label="1001000100 (1) 1001100100" source="22403" target="22352" cy:directed="1"/>
      <edge id="26143" label="1001000100 (1) 1011000100" source="22403" target="22351" cy:directed="1"/>
      <edge id="26142" label="1001000100 (1) 1101000100" source="22403" target="22391" cy:directed="1"/>
      <edge id="26141" label="1010000100 (1) 1010000110" source="22402" target="22370" cy:directed="1"/>
      <edge id="26140" label="1010000100 (1) 1010000000" source="22402" target="22543" cy:directed="1"/>
      <edge id="26139" label="1010000100 (1) 1010100100" source="22402" target="22369" cy:directed="1"/>
      <edge id="26138" label="1010000100 (1) 1110000100" source="22402" target="22368" cy:directed="1"/>
      <edge id="26137" label="1100000100 (1) 1100000110" source="22401" target="22393" cy:directed="1"/>
      <edge id="26136" label="1100000100 (1) 1100000000" source="22401" target="22549" cy:directed="1"/>
      <edge id="26135" label="1100000100 (1) 1100100100" source="22401" target="22392" cy:directed="1"/>
      <edge id="26134" label="1100000100 (1) 1101000100" source="22401" target="22391" cy:directed="1"/>
      <edge id="26133" label="0011001000 (1) 0011001010" source="22400" target="22399" cy:directed="1"/>
      <edge id="26132" label="0011001000 (1) 0011000000" source="22400" target="22526" cy:directed="1"/>
      <edge id="26131" label="0011001000 (1) 0010001000" source="22400" target="22428" cy:directed="1"/>
      <edge id="26130" label="0011001000 (1) 0001001000" source="22400" target="22449" cy:directed="1"/>
      <edge id="26129" label="0011001010 (1) 0011000010" source="22399" target="22525" cy:directed="1"/>
      <edge id="26128" label="0011001010 (1) 0010001010" source="22399" target="22427" cy:directed="1"/>
      <edge id="26127" label="0011001010 (1) 0001001010" source="22399" target="22416" cy:directed="1"/>
      <edge id="26126" label="0000000100 (1) 0000000110" source="22398" target="22397" cy:directed="1"/>
      <edge id="26125" label="0000000100 (1) 0000000000" source="22398" target="22555" cy:directed="1"/>
      <edge id="26124" label="0000000100 (1) 0000100100" source="22398" target="22396" cy:directed="1"/>
      <edge id="26123" label="0000000100 (1) 0001000100" source="22398" target="22395" cy:directed="1"/>
      <edge id="26122" label="0000000100 (1) 0010000100" source="22398" target="22394" cy:directed="1"/>
      <edge id="26121" label="0000000110 (1) 0000000010" source="22397" target="22554" cy:directed="1"/>
      <edge id="26120" label="0000000110 (1) 0000100110" source="22397" target="22016" cy:directed="1"/>
      <edge id="26119" label="0000000110 (1) 0001000110" source="22397" target="22350" cy:directed="1"/>
      <edge id="26118" label="0000000110 (1) 0010000110" source="22397" target="22367" cy:directed="1"/>
      <edge id="26117" label="0000100100 (1) 0000100000" source="22396" target="22514" cy:directed="1"/>
      <edge id="26116" label="0000100100 (1) 0000110100" source="22396" target="22318" cy:directed="1"/>
      <edge id="26115" label="0000100100 (1) 0001100100" source="22396" target="22349" cy:directed="1"/>
      <edge id="26114" label="0000100100 (1) 0010100100" source="22396" target="22366" cy:directed="1"/>
      <edge id="26113" label="0001000100 (1) 0001000110" source="22395" target="22350" cy:directed="1"/>
      <edge id="26112" label="0001000100 (1) 0001000000" source="22395" target="22553" cy:directed="1"/>
      <edge id="26111" label="0001000100 (1) 0001100100" source="22395" target="22349" cy:directed="1"/>
      <edge id="26110" label="0001000100 (1) 0011000100" source="22395" target="22348" cy:directed="1"/>
      <edge id="26109" label="0010000100 (1) 0010000110" source="22394" target="22367" cy:directed="1"/>
      <edge id="26108" label="0010000100 (1) 0010000000" source="22394" target="22540" cy:directed="1"/>
      <edge id="26107" label="0010000100 (1) 0010100100" source="22394" target="22366" cy:directed="1"/>
      <edge id="26106" label="1100000110 (1) 1100000010" source="22393" target="22548" cy:directed="1"/>
      <edge id="26105" label="1100000110 (1) 1100100110" source="22393" target="22015" cy:directed="1"/>
      <edge id="26104" label="1100000110 (1) 1101000110" source="22393" target="22347" cy:directed="1"/>
      <edge id="26103" label="1100100100 (1) 1100100000" source="22392" target="22515" cy:directed="1"/>
      <edge id="26102" label="1100100100 (1) 1100110100" source="22392" target="22315" cy:directed="1"/>
      <edge id="26101" label="1100100100 (1) 1101100100" source="22392" target="22346" cy:directed="1"/>
      <edge id="26100" label="1100100100 (1) 1110100100" source="22392" target="22361" cy:directed="1"/>
      <edge id="26099" label="1101000100 (1) 1101000110" source="22391" target="22347" cy:directed="1"/>
      <edge id="26098" label="1101000100 (1) 1101000000" source="22391" target="22547" cy:directed="1"/>
      <edge id="26097" label="1101000100 (1) 1101100100" source="22391" target="22346" cy:directed="1"/>
      <edge id="26096" label="1001111000 (1) 1001111100" source="22390" target="22193" cy:directed="1"/>
      <edge id="26095" label="1001111000 (1) 1001011000" source="22390" target="22462" cy:directed="1"/>
      <edge id="26094" label="1001111000 (1) 1011111000" source="22390" target="22360" cy:directed="1"/>
      <edge id="26093" label="1111001010 (1) 1111000010" source="22389" target="22524" cy:directed="1"/>
      <edge id="26092" label="1111001010 (1) 1111101010" source="22389" target="22013" cy:directed="1"/>
      <edge id="26091" label="1111001010 (1) 1110001010" source="22389" target="22426" cy:directed="1"/>
      <edge id="26090" label="1111001010 (1) 1101001010" source="22389" target="22414" cy:directed="1"/>
      <edge id="26089" label="1111101000 (1) 1111100000" source="22388" target="22523" cy:directed="1"/>
      <edge id="26088" label="1111101000 (1) 1111111000" source="22388" target="22355" cy:directed="1"/>
      <edge id="26087" label="1111101000 (1) 1110101000" source="22388" target="22365" cy:directed="1"/>
      <edge id="26086" label="0001111000 (1) 0001111100" source="22387" target="22189" cy:directed="1"/>
      <edge id="26085" label="0001111000 (1) 0001011000" source="22387" target="22460" cy:directed="1"/>
      <edge id="26084" label="0001111000 (1) 0011111000" source="22387" target="22359" cy:directed="1"/>
      <edge id="26083" label="0100000100 (1) 0100000110" source="22386" target="22385" cy:directed="1"/>
      <edge id="26082" label="0100000100 (1) 0100000000" source="22386" target="22546" cy:directed="1"/>
      <edge id="26081" label="0100000100 (1) 0100100100" source="22386" target="22384" cy:directed="1"/>
      <edge id="26080" label="0100000100 (1) 0101000100" source="22386" target="22383" cy:directed="1"/>
      <edge id="26079" label="0100000100 (1) 0000000100" source="22386" target="22398" cy:directed="1"/>
      <edge id="26078" label="0100000110 (1) 0100000010" source="22385" target="22545" cy:directed="1"/>
      <edge id="26077" label="0100000110 (1) 0100100110" source="22385" target="22012" cy:directed="1"/>
      <edge id="26076" label="0100000110 (1) 0101000110" source="22385" target="22345" cy:directed="1"/>
      <edge id="26075" label="0100000110 (1) 0000000110" source="22385" target="22397" cy:directed="1"/>
      <edge id="26074" label="0100100100 (1) 0100100000" source="22384" target="22508" cy:directed="1"/>
      <edge id="26073" label="0100100100 (1) 0100110100" source="22384" target="22312" cy:directed="1"/>
      <edge id="26072" label="0100100100 (1) 0101100100" source="22384" target="22344" cy:directed="1"/>
      <edge id="26071" label="0100100100 (1) 0110100100" source="22384" target="22356" cy:directed="1"/>
      <edge id="26070" label="0100100100 (1) 0000100100" source="22384" target="22396" cy:directed="1"/>
      <edge id="26069" label="0101000100 (1) 0101000110" source="22383" target="22345" cy:directed="1"/>
      <edge id="26068" label="0101000100 (1) 0101000000" source="22383" target="22544" cy:directed="1"/>
      <edge id="26067" label="0101000100 (1) 0101100100" source="22383" target="22344" cy:directed="1"/>
      <edge id="26066" label="0101000100 (1) 0001000100" source="22383" target="22395" cy:directed="1"/>
      <edge id="26065" label="0111001000 (1) 0111001010" source="22382" target="22381" cy:directed="1"/>
      <edge id="26064" label="0111001000 (1) 0111000000" source="22382" target="22522" cy:directed="1"/>
      <edge id="26063" label="0111001000 (1) 0111101000" source="22382" target="22380" cy:directed="1"/>
      <edge id="26062" label="0111001000 (1) 0110001000" source="22382" target="22423" cy:directed="1"/>
      <edge id="26061" label="0111001000 (1) 0101001000" source="22382" target="22444" cy:directed="1"/>
      <edge id="26060" label="0111001000 (1) 0011001000" source="22382" target="22400" cy:directed="1"/>
      <edge id="26059" label="0111001010 (1) 0111000010" source="22381" target="22521" cy:directed="1"/>
      <edge id="26058" label="0111001010 (1) 0111101010" source="22381" target="22010" cy:directed="1"/>
      <edge id="26057" label="0111001010 (1) 0110001010" source="22381" target="22422" cy:directed="1"/>
      <edge id="26056" label="0111001010 (1) 0101001010" source="22381" target="22411" cy:directed="1"/>
      <edge id="26055" label="0111001010 (1) 0011001010" source="22381" target="22399" cy:directed="1"/>
      <edge id="26054" label="0111101000 (1) 0111100000" source="22380" target="22520" cy:directed="1"/>
      <edge id="26053" label="0111101000 (1) 0111111000" source="22380" target="22354" cy:directed="1"/>
      <edge id="26052" label="0111101000 (1) 0110101000" source="22380" target="22363" cy:directed="1"/>
      <edge id="26051" label="0111101000 (1) 0011101000" source="22380" target="22339" cy:directed="1"/>
      <edge id="26050" label="1101111000 (1) 1101111100" source="22379" target="22183" cy:directed="1"/>
      <edge id="26049" label="1101111000 (1) 1111111000" source="22379" target="22355" cy:directed="1"/>
      <edge id="26048" label="1101111000 (1) 1001111000" source="22379" target="22390" cy:directed="1"/>
      <edge id="26047" label="0101111000 (1) 0101111100" source="22378" target="22182" cy:directed="1"/>
      <edge id="26046" label="0101111000 (1) 0111111000" source="22378" target="22354" cy:directed="1"/>
      <edge id="26045" label="0101111000 (1) 0001111000" source="22378" target="22387" cy:directed="1"/>
      <edge id="26044" label="0000101000 (1) 0000100000" source="22377" target="22514" cy:directed="1"/>
      <edge id="26043" label="0000101000 (1) 0000111000" source="22377" target="22424" cy:directed="1"/>
      <edge id="26042" label="0000101000 (1) 0000001000" source="22377" target="22451" cy:directed="1"/>
      <edge id="26041" label="0000101000 (1) 0001101000" source="22377" target="22376" cy:directed="1"/>
      <edge id="26040" label="0000101000 (1) 0010101000" source="22377" target="22375" cy:directed="1"/>
      <edge id="26039" label="0001101000 (1) 0001100000" source="22376" target="22512" cy:directed="1"/>
      <edge id="26038" label="0001101000 (1) 0001111000" source="22376" target="22387" cy:directed="1"/>
      <edge id="26037" label="0001101000 (1) 0001001000" source="22376" target="22449" cy:directed="1"/>
      <edge id="26036" label="0001101000 (1) 0011101000" source="22376" target="22339" cy:directed="1"/>
      <edge id="26035" label="0010101000 (1) 0010100000" source="22375" target="22511" cy:directed="1"/>
      <edge id="26034" label="0010101000 (1) 0010111000" source="22375" target="22417" cy:directed="1"/>
      <edge id="26033" label="0010101000 (1) 0010001000" source="22375" target="22428" cy:directed="1"/>
      <edge id="26032" label="1000101000 (1) 1000100000" source="22374" target="22519" cy:directed="1"/>
      <edge id="26031" label="1000101000 (1) 1000111000" source="22374" target="22425" cy:directed="1"/>
      <edge id="26030" label="1000101000 (1) 1000001000" source="22374" target="22455" cy:directed="1"/>
      <edge id="26029" label="1000101000 (1) 1001101000" source="22374" target="22373" cy:directed="1"/>
      <edge id="26028" label="1000101000 (1) 1010101000" source="22374" target="22372" cy:directed="1"/>
      <edge id="26027" label="1000101000 (1) 1100101000" source="22374" target="22371" cy:directed="1"/>
      <edge id="26026" label="1001101000 (1) 1001100000" source="22373" target="22517" cy:directed="1"/>
      <edge id="26025" label="1001101000 (1) 1001111000" source="22373" target="22390" cy:directed="1"/>
      <edge id="26024" label="1001101000 (1) 1001001000" source="22373" target="22453" cy:directed="1"/>
      <edge id="26023" label="1001101000 (1) 1011101000" source="22373" target="22338" cy:directed="1"/>
      <edge id="26022" label="1001101000 (1) 1101101000" source="22373" target="22413" cy:directed="1"/>
      <edge id="26021" label="1010101000 (1) 1010100000" source="22372" target="22516" cy:directed="1"/>
      <edge id="26020" label="1010101000 (1) 1010111000" source="22372" target="22419" cy:directed="1"/>
      <edge id="26019" label="1010101000 (1) 1010001000" source="22372" target="22431" cy:directed="1"/>
      <edge id="26018" label="1010101000 (1) 1110101000" source="22372" target="22365" cy:directed="1"/>
      <edge id="26017" label="1100101000 (1) 1100100000" source="22371" target="22515" cy:directed="1"/>
      <edge id="26016" label="1100101000 (1) 1100111000" source="22371" target="22421" cy:directed="1"/>
      <edge id="26015" label="1100101000 (1) 1100001000" source="22371" target="22452" cy:directed="1"/>
      <edge id="26014" label="1100101000 (1) 1101101000" source="22371" target="22413" cy:directed="1"/>
      <edge id="26013" label="1100101000 (1) 1110101000" source="22371" target="22365" cy:directed="1"/>
      <edge id="26012" label="1010000110 (1) 1010000010" source="22370" target="22542" cy:directed="1"/>
      <edge id="26011" label="1010000110 (1) 1010100110" source="22370" target="21986" cy:directed="1"/>
      <edge id="26010" label="1010000110 (1) 1110000110" source="22370" target="22362" cy:directed="1"/>
      <edge id="26009" label="1010100100 (1) 1010100000" source="22369" target="22516" cy:directed="1"/>
      <edge id="26008" label="1010100100 (1) 1010110100" source="22369" target="22311" cy:directed="1"/>
      <edge id="26007" label="1010100100 (1) 1110100100" source="22369" target="22361" cy:directed="1"/>
      <edge id="26006" label="1110000100 (1) 1110000110" source="22368" target="22362" cy:directed="1"/>
      <edge id="26005" label="1110000100 (1) 1110000000" source="22368" target="22541" cy:directed="1"/>
      <edge id="26004" label="1110000100 (1) 1110100100" source="22368" target="22361" cy:directed="1"/>
      <edge id="26003" label="1110000100 (1) 1100000100" source="22368" target="22401" cy:directed="1"/>
      <edge id="26002" label="0010000110 (1) 0010000010" source="22367" target="22539" cy:directed="1"/>
      <edge id="26001" label="0010000110 (1) 0010100110" source="22367" target="21985" cy:directed="1"/>
      <edge id="26000" label="0010100100 (1) 0010100000" source="22366" target="22511" cy:directed="1"/>
      <edge id="25999" label="0010100100 (1) 0010110100" source="22366" target="22310" cy:directed="1"/>
      <edge id="25998" label="1110101000 (1) 1110100000" source="22365" target="22509" cy:directed="1"/>
      <edge id="25997" label="1110101000 (1) 1110111000" source="22365" target="22415" cy:directed="1"/>
      <edge id="25996" label="1110101000 (1) 1110001000" source="22365" target="22429" cy:directed="1"/>
      <edge id="25995" label="0100101000 (1) 0100100000" source="22364" target="22508" cy:directed="1"/>
      <edge id="25994" label="0100101000 (1) 0100111000" source="22364" target="22420" cy:directed="1"/>
      <edge id="25993" label="0100101000 (1) 0100001000" source="22364" target="22446" cy:directed="1"/>
      <edge id="25992" label="0100101000 (1) 0101101000" source="22364" target="22410" cy:directed="1"/>
      <edge id="25991" label="0100101000 (1) 0110101000" source="22364" target="22363" cy:directed="1"/>
      <edge id="25990" label="0100101000 (1) 0000101000" source="22364" target="22377" cy:directed="1"/>
      <edge id="25989" label="0110101000 (1) 0110100000" source="22363" target="22506" cy:directed="1"/>
      <edge id="25988" label="0110101000 (1) 0110111000" source="22363" target="22412" cy:directed="1"/>
      <edge id="25987" label="0110101000 (1) 0110001000" source="22363" target="22423" cy:directed="1"/>
      <edge id="25986" label="0110101000 (1) 0010101000" source="22363" target="22375" cy:directed="1"/>
      <edge id="25985" label="1110000110 (1) 1110000010" source="22362" target="22538" cy:directed="1"/>
      <edge id="25984" label="1110000110 (1) 1110100110" source="22362" target="21970" cy:directed="1"/>
      <edge id="25983" label="1110000110 (1) 1100000110" source="22362" target="22393" cy:directed="1"/>
      <edge id="25982" label="1110100100 (1) 1110100000" source="22361" target="22509" cy:directed="1"/>
      <edge id="25981" label="1110100100 (1) 1110110100" source="22361" target="22309" cy:directed="1"/>
      <edge id="25980" label="1011111000 (1) 1011111100" source="22360" target="22162" cy:directed="1"/>
      <edge id="25979" label="1011111000 (1) 1011011000" source="22360" target="22441" cy:directed="1"/>
      <edge id="25978" label="1011111000 (1) 1010111000" source="22360" target="22419" cy:directed="1"/>
      <edge id="25977" label="0011111000 (1) 0011111100" source="22359" target="22158" cy:directed="1"/>
      <edge id="25976" label="0011111000 (1) 0011011000" source="22359" target="22438" cy:directed="1"/>
      <edge id="25975" label="0011111000 (1) 0010111000" source="22359" target="22417" cy:directed="1"/>
      <edge id="25974" label="0110000100 (1) 0110000110" source="22358" target="22357" cy:directed="1"/>
      <edge id="25973" label="0110000100 (1) 0110000000" source="22358" target="22537" cy:directed="1"/>
      <edge id="25972" label="0110000100 (1) 0110100100" source="22358" target="22356" cy:directed="1"/>
      <edge id="25971" label="0110000100 (1) 0100000100" source="22358" target="22386" cy:directed="1"/>
      <edge id="25970" label="0110000100 (1) 0010000100" source="22358" target="22394" cy:directed="1"/>
      <edge id="25969" label="0110000110 (1) 0110000010" source="22357" target="22536" cy:directed="1"/>
      <edge id="25968" label="0110000110 (1) 0110100110" source="22357" target="21969" cy:directed="1"/>
      <edge id="25967" label="0110000110 (1) 0100000110" source="22357" target="22385" cy:directed="1"/>
      <edge id="25966" label="0110000110 (1) 0010000110" source="22357" target="22367" cy:directed="1"/>
      <edge id="25965" label="0110100100 (1) 0110100000" source="22356" target="22506" cy:directed="1"/>
      <edge id="25964" label="0110100100 (1) 0110110100" source="22356" target="22304" cy:directed="1"/>
      <edge id="25963" label="0110100100 (1) 0010100100" source="22356" target="22366" cy:directed="1"/>
      <edge id="25962" label="1111111000 (1) 1111111100" source="22355" target="22157" cy:directed="1"/>
      <edge id="25961" label="1111111000 (1) 1110111000" source="22355" target="22415" cy:directed="1"/>
      <edge id="25960" label="1111111000 (1) 1011111000" source="22355" target="22360" cy:directed="1"/>
      <edge id="25959" label="0111111000 (1) 0111111100" source="22354" target="22156" cy:directed="1"/>
      <edge id="25958" label="0111111000 (1) 0110111000" source="22354" target="22412" cy:directed="1"/>
      <edge id="25957" label="0111111000 (1) 0011111000" source="22354" target="22359" cy:directed="1"/>
      <edge id="25956" label="1001000110 (1) 1001000010" source="22353" target="22534" cy:directed="1"/>
      <edge id="25955" label="1001000110 (1) 1001100110" source="22353" target="21930" cy:directed="1"/>
      <edge id="25954" label="1001000110 (1) 1011000110" source="22353" target="22335" cy:directed="1"/>
      <edge id="25953" label="1001000110 (1) 1101000110" source="22353" target="22347" cy:directed="1"/>
      <edge id="25952" label="1001100100 (1) 1001100000" source="22352" target="22517" cy:directed="1"/>
      <edge id="25951" label="1001100100 (1) 1001110100" source="22352" target="22298" cy:directed="1"/>
      <edge id="25950" label="1001100100 (1) 1011100100" source="22352" target="22334" cy:directed="1"/>
      <edge id="25949" label="1001100100 (1) 1101100100" source="22352" target="22346" cy:directed="1"/>
      <edge id="25948" label="1011000100 (1) 1011000110" source="22351" target="22335" cy:directed="1"/>
      <edge id="25947" label="1011000100 (1) 1011000000" source="22351" target="22529" cy:directed="1"/>
      <edge id="25946" label="1011000100 (1) 1011100100" source="22351" target="22334" cy:directed="1"/>
      <edge id="25945" label="1011000100 (1) 1010000100" source="22351" target="22402" cy:directed="1"/>
      <edge id="25944" label="1011000100 (1) 1111000100" source="22351" target="22333" cy:directed="1"/>
      <edge id="25943" label="0001000110 (1) 0001000010" source="22350" target="22535" cy:directed="1"/>
      <edge id="25942" label="0001000110 (1) 0001100110" source="22350" target="21929" cy:directed="1"/>
      <edge id="25941" label="0001000110 (1) 0011000110" source="22350" target="22330" cy:directed="1"/>
      <edge id="25940" label="0001100100 (1) 0001100000" source="22349" target="22512" cy:directed="1"/>
      <edge id="25939" label="0001100100 (1) 0001110100" source="22349" target="22294" cy:directed="1"/>
      <edge id="25938" label="0001100100 (1) 0011100100" source="22349" target="22329" cy:directed="1"/>
      <edge id="25937" label="0011000100 (1) 0011000110" source="22348" target="22330" cy:directed="1"/>
      <edge id="25936" label="0011000100 (1) 0011000000" source="22348" target="22526" cy:directed="1"/>
      <edge id="25935" label="0011000100 (1) 0011100100" source="22348" target="22329" cy:directed="1"/>
      <edge id="25934" label="0011000100 (1) 0010000100" source="22348" target="22394" cy:directed="1"/>
      <edge id="25933" label="1101000110 (1) 1101000010" source="22347" target="22533" cy:directed="1"/>
      <edge id="25932" label="1101000110 (1) 1101100110" source="22347" target="21919" cy:directed="1"/>
      <edge id="25931" label="1101100100 (1) 1101100000" source="22346" target="22532" cy:directed="1"/>
      <edge id="25930" label="1101100100 (1) 1101110100" source="22346" target="22283" cy:directed="1"/>
      <edge id="25929" label="1101100100 (1) 1111100100" source="22346" target="22327" cy:directed="1"/>
      <edge id="25928" label="0101000110 (1) 0101000010" source="22345" target="22531" cy:directed="1"/>
      <edge id="25927" label="0101000110 (1) 0101100110" source="22345" target="21917" cy:directed="1"/>
      <edge id="25926" label="0101000110 (1) 0001000110" source="22345" target="22350" cy:directed="1"/>
      <edge id="25925" label="0101100100 (1) 0101100000" source="22344" target="22530" cy:directed="1"/>
      <edge id="25924" label="0101100100 (1) 0101110100" source="22344" target="22282" cy:directed="1"/>
      <edge id="25923" label="0101100100 (1) 0111100100" source="22344" target="22324" cy:directed="1"/>
      <edge id="25922" label="0101100100 (1) 0001100100" source="22344" target="22349" cy:directed="1"/>
      <edge id="25921" label="1000011010 (1) 1000011110" source="22343" target="22049" cy:directed="1"/>
      <edge id="25920" label="1000011010 (1) 1000010010" source="22343" target="22498" cy:directed="1"/>
      <edge id="25919" label="1000011010 (1) 1000001010" source="22343" target="22454" cy:directed="1"/>
      <edge id="25918" label="1000011010 (1) 1001011010" source="22343" target="22308" cy:directed="1"/>
      <edge id="25917" label="1000011100 (1) 1000011110" source="22342" target="22049" cy:directed="1"/>
      <edge id="25916" label="1000011100 (1) 1000001100" source="22342" target="22212" cy:directed="1"/>
      <edge id="25915" label="1000011100 (1) 1001011100" source="22342" target="22307" cy:directed="1"/>
      <edge id="25914" label="1000011100 (1) 1010011100" source="22342" target="22322" cy:directed="1"/>
      <edge id="25913" label="0000011010 (1) 0000011110" source="22341" target="22046" cy:directed="1"/>
      <edge id="25912" label="0000011010 (1) 0000010010" source="22341" target="22492" cy:directed="1"/>
      <edge id="25911" label="0000011010 (1) 0000001010" source="22341" target="22450" cy:directed="1"/>
      <edge id="25910" label="0000011010 (1) 0001011010" source="22341" target="22306" cy:directed="1"/>
      <edge id="25909" label="0000011100 (1) 0000011110" source="22340" target="22046" cy:directed="1"/>
      <edge id="25908" label="0000011100 (1) 0000001100" source="22340" target="22207" cy:directed="1"/>
      <edge id="25907" label="0000011100 (1) 0001011100" source="22340" target="22305" cy:directed="1"/>
      <edge id="25906" label="0000011100 (1) 0010011100" source="22340" target="22319" cy:directed="1"/>
      <edge id="25905" label="0011101000 (1) 0011100000" source="22339" target="22494" cy:directed="1"/>
      <edge id="25904" label="0011101000 (1) 0011111000" source="22339" target="22359" cy:directed="1"/>
      <edge id="25903" label="0011101000 (1) 0011001000" source="22339" target="22400" cy:directed="1"/>
      <edge id="25902" label="0011101000 (1) 0010101000" source="22339" target="22375" cy:directed="1"/>
      <edge id="25901" label="1011101000 (1) 1011100000" source="22338" target="22500" cy:directed="1"/>
      <edge id="25900" label="1011101000 (1) 1011111000" source="22338" target="22360" cy:directed="1"/>
      <edge id="25899" label="1011101000 (1) 1011001000" source="22338" target="22409" cy:directed="1"/>
      <edge id="25898" label="1011101000 (1) 1010101000" source="22338" target="22372" cy:directed="1"/>
      <edge id="25897" label="1011101000 (1) 1111101000" source="22338" target="22388" cy:directed="1"/>
      <edge id="25896" label="1100011010 (1) 1100011110" source="22337" target="22031" cy:directed="1"/>
      <edge id="25895" label="1100011010 (1) 1100010010" source="22337" target="22487" cy:directed="1"/>
      <edge id="25894" label="1100011010 (1) 1100001010" source="22337" target="22448" cy:directed="1"/>
      <edge id="25893" label="1100011010 (1) 1101011010" source="22337" target="22303" cy:directed="1"/>
      <edge id="25892" label="1100011010 (1) 1000011010" source="22337" target="22343" cy:directed="1"/>
      <edge id="25891" label="1100011100 (1) 1100011110" source="22336" target="22031" cy:directed="1"/>
      <edge id="25890" label="1100011100 (1) 1100001100" source="22336" target="22208" cy:directed="1"/>
      <edge id="25889" label="1100011100 (1) 1101011100" source="22336" target="22302" cy:directed="1"/>
      <edge id="25888" label="1100011100 (1) 1000011100" source="22336" target="22342" cy:directed="1"/>
      <edge id="25887" label="1011000110 (1) 1011000010" source="22335" target="22528" cy:directed="1"/>
      <edge id="25886" label="1011000110 (1) 1011100110" source="22335" target="21902" cy:directed="1"/>
      <edge id="25885" label="1011000110 (1) 1010000110" source="22335" target="22370" cy:directed="1"/>
      <edge id="25884" label="1011000110 (1) 1111000110" source="22335" target="22328" cy:directed="1"/>
      <edge id="25883" label="1011100100 (1) 1011100000" source="22334" target="22500" cy:directed="1"/>
      <edge id="25882" label="1011100100 (1) 1011110100" source="22334" target="22267" cy:directed="1"/>
      <edge id="25881" label="1011100100 (1) 1010100100" source="22334" target="22369" cy:directed="1"/>
      <edge id="25880" label="1011100100 (1) 1111100100" source="22334" target="22327" cy:directed="1"/>
      <edge id="25879" label="1111000100 (1) 1111000110" source="22333" target="22328" cy:directed="1"/>
      <edge id="25878" label="1111000100 (1) 1111000000" source="22333" target="22527" cy:directed="1"/>
      <edge id="25877" label="1111000100 (1) 1111100100" source="22333" target="22327" cy:directed="1"/>
      <edge id="25876" label="1111000100 (1) 1110000100" source="22333" target="22368" cy:directed="1"/>
      <edge id="25875" label="1111000100 (1) 1101000100" source="22333" target="22391" cy:directed="1"/>
      <edge id="25874" label="0100011010 (1) 0100011110" source="22332" target="22030" cy:directed="1"/>
      <edge id="25873" label="0100011010 (1) 0100010010" source="22332" target="22482" cy:directed="1"/>
      <edge id="25872" label="0100011010 (1) 0100001010" source="22332" target="22445" cy:directed="1"/>
      <edge id="25871" label="0100011010 (1) 0101011010" source="22332" target="22301" cy:directed="1"/>
      <edge id="25870" label="0100011010 (1) 0000011010" source="22332" target="22341" cy:directed="1"/>
      <edge id="25869" label="0100011100 (1) 0100011110" source="22331" target="22030" cy:directed="1"/>
      <edge id="25868" label="0100011100 (1) 0100001100" source="22331" target="22192" cy:directed="1"/>
      <edge id="25867" label="0100011100 (1) 0101011100" source="22331" target="22300" cy:directed="1"/>
      <edge id="25866" label="0100011100 (1) 0000011100" source="22331" target="22340" cy:directed="1"/>
      <edge id="25865" label="0011000110 (1) 0011000010" source="22330" target="22525" cy:directed="1"/>
      <edge id="25864" label="0011000110 (1) 0011100110" source="22330" target="21900" cy:directed="1"/>
      <edge id="25863" label="0011000110 (1) 0010000110" source="22330" target="22367" cy:directed="1"/>
      <edge id="25862" label="0011100100 (1) 0011100000" source="22329" target="22494" cy:directed="1"/>
      <edge id="25861" label="0011100100 (1) 0011110100" source="22329" target="22265" cy:directed="1"/>
      <edge id="25860" label="0011100100 (1) 0010100100" source="22329" target="22366" cy:directed="1"/>
      <edge id="25859" label="1111000110 (1) 1111000010" source="22328" target="22524" cy:directed="1"/>
      <edge id="25858" label="1111000110 (1) 1111100110" source="22328" target="21893" cy:directed="1"/>
      <edge id="25857" label="1111000110 (1) 1110000110" source="22328" target="22362" cy:directed="1"/>
      <edge id="25856" label="1111000110 (1) 1101000110" source="22328" target="22347" cy:directed="1"/>
      <edge id="25855" label="1111100100 (1) 1111100000" source="22327" target="22523" cy:directed="1"/>
      <edge id="25854" label="1111100100 (1) 1111110100" source="22327" target="22261" cy:directed="1"/>
      <edge id="25853" label="1111100100 (1) 1110100100" source="22327" target="22361" cy:directed="1"/>
      <edge id="25852" label="0111000100 (1) 0111000110" source="22326" target="22325" cy:directed="1"/>
      <edge id="25851" label="0111000100 (1) 0111000000" source="22326" target="22522" cy:directed="1"/>
      <edge id="25850" label="0111000100 (1) 0111100100" source="22326" target="22324" cy:directed="1"/>
      <edge id="25849" label="0111000100 (1) 0110000100" source="22326" target="22358" cy:directed="1"/>
      <edge id="25848" label="0111000100 (1) 0101000100" source="22326" target="22383" cy:directed="1"/>
      <edge id="25847" label="0111000100 (1) 0011000100" source="22326" target="22348" cy:directed="1"/>
      <edge id="25846" label="0111000110 (1) 0111000010" source="22325" target="22521" cy:directed="1"/>
      <edge id="25845" label="0111000110 (1) 0111100110" source="22325" target="21892" cy:directed="1"/>
      <edge id="25844" label="0111000110 (1) 0110000110" source="22325" target="22357" cy:directed="1"/>
      <edge id="25843" label="0111000110 (1) 0101000110" source="22325" target="22345" cy:directed="1"/>
      <edge id="25842" label="0111000110 (1) 0011000110" source="22325" target="22330" cy:directed="1"/>
      <edge id="25841" label="0111100100 (1) 0111100000" source="22324" target="22520" cy:directed="1"/>
      <edge id="25840" label="0111100100 (1) 0111110100" source="22324" target="22260" cy:directed="1"/>
      <edge id="25839" label="0111100100 (1) 0110100100" source="22324" target="22356" cy:directed="1"/>
      <edge id="25838" label="0111100100 (1) 0011100100" source="22324" target="22329" cy:directed="1"/>
      <edge id="25837" label="1010011010 (1) 1010011110" source="22323" target="22014" cy:directed="1"/>
      <edge id="25836" label="1010011010 (1) 1010010010" source="22323" target="22477" cy:directed="1"/>
      <edge id="25835" label="1010011010 (1) 1010001010" source="22323" target="22430" cy:directed="1"/>
      <edge id="25834" label="1010011010 (1) 1000011010" source="22323" target="22343" cy:directed="1"/>
      <edge id="25833" label="1010011100 (1) 1010011110" source="22322" target="22014" cy:directed="1"/>
      <edge id="25832" label="1010011100 (1) 1010001100" source="22322" target="22209" cy:directed="1"/>
      <edge id="25831" label="1000110100 (1) 1000110000" source="22321" target="22518" cy:directed="1"/>
      <edge id="25830" label="1000110100 (1) 1000111100" source="22321" target="22271" cy:directed="1"/>
      <edge id="25829" label="1000110100 (1) 1001110100" source="22321" target="22298" cy:directed="1"/>
      <edge id="25828" label="1000110100 (1) 1010110100" source="22321" target="22311" cy:directed="1"/>
      <edge id="25827" label="0010011010 (1) 0010011110" source="22320" target="22011" cy:directed="1"/>
      <edge id="25826" label="0010011010 (1) 0010010010" source="22320" target="22473" cy:directed="1"/>
      <edge id="25825" label="0010011010 (1) 0010001010" source="22320" target="22427" cy:directed="1"/>
      <edge id="25824" label="0010011010 (1) 0000011010" source="22320" target="22341" cy:directed="1"/>
      <edge id="25823" label="0010011100 (1) 0010011110" source="22319" target="22011" cy:directed="1"/>
      <edge id="25822" label="0010011100 (1) 0010001100" source="22319" target="22204" cy:directed="1"/>
      <edge id="25821" label="0000110100 (1) 0000110000" source="22318" target="22513" cy:directed="1"/>
      <edge id="25820" label="0000110100 (1) 0000111100" source="22318" target="22270" cy:directed="1"/>
      <edge id="25819" label="0000110100 (1) 0001110100" source="22318" target="22294" cy:directed="1"/>
      <edge id="25818" label="0000110100 (1) 0010110100" source="22318" target="22310" cy:directed="1"/>
      <edge id="25817" label="1110011010 (1) 1110011110" source="22317" target="22009" cy:directed="1"/>
      <edge id="25816" label="1110011010 (1) 1110010010" source="22317" target="22469" cy:directed="1"/>
      <edge id="25815" label="1110011010 (1) 1110001010" source="22317" target="22426" cy:directed="1"/>
      <edge id="25814" label="1110011010 (1) 1100011010" source="22317" target="22337" cy:directed="1"/>
      <edge id="25813" label="1110011010 (1) 1010011010" source="22317" target="22323" cy:directed="1"/>
      <edge id="25812" label="1110011100 (1) 1110011110" source="22316" target="22009" cy:directed="1"/>
      <edge id="25811" label="1110011100 (1) 1110001100" source="22316" target="22174" cy:directed="1"/>
      <edge id="25810" label="1110011100 (1) 1100011100" source="22316" target="22336" cy:directed="1"/>
      <edge id="25809" label="1110011100 (1) 1010011100" source="22316" target="22322" cy:directed="1"/>
      <edge id="25808" label="1100110100 (1) 1100110000" source="22315" target="22510" cy:directed="1"/>
      <edge id="25807" label="1100110100 (1) 1100111100" source="22315" target="22269" cy:directed="1"/>
      <edge id="25806" label="1100110100 (1) 1101110100" source="22315" target="22283" cy:directed="1"/>
      <edge id="25805" label="1100110100 (1) 1110110100" source="22315" target="22309" cy:directed="1"/>
      <edge id="25804" label="1100110100 (1) 1000110100" source="22315" target="22321" cy:directed="1"/>
      <edge id="25803" label="0110011010 (1) 0110011110" source="22314" target="22008" cy:directed="1"/>
      <edge id="25802" label="0110011010 (1) 0110010010" source="22314" target="22465" cy:directed="1"/>
      <edge id="25801" label="0110011010 (1) 0110001010" source="22314" target="22422" cy:directed="1"/>
      <edge id="25800" label="0110011010 (1) 0100011010" source="22314" target="22332" cy:directed="1"/>
      <edge id="25799" label="0110011010 (1) 0010011010" source="22314" target="22320" cy:directed="1"/>
      <edge id="25798" label="0110011100 (1) 0110011110" source="22313" target="22008" cy:directed="1"/>
      <edge id="25797" label="0110011100 (1) 0110001100" source="22313" target="22160" cy:directed="1"/>
      <edge id="25796" label="0110011100 (1) 0100011100" source="22313" target="22331" cy:directed="1"/>
      <edge id="25795" label="0110011100 (1) 0010011100" source="22313" target="22319" cy:directed="1"/>
      <edge id="25794" label="0100110100 (1) 0100110000" source="22312" target="22507" cy:directed="1"/>
      <edge id="25793" label="0100110100 (1) 0100111100" source="22312" target="22266" cy:directed="1"/>
      <edge id="25792" label="0100110100 (1) 0101110100" source="22312" target="22282" cy:directed="1"/>
      <edge id="25791" label="0100110100 (1) 0110110100" source="22312" target="22304" cy:directed="1"/>
      <edge id="25790" label="0100110100 (1) 0000110100" source="22312" target="22318" cy:directed="1"/>
      <edge id="25789" label="1010110100 (1) 1010110000" source="22311" target="22505" cy:directed="1"/>
      <edge id="25788" label="1010110100 (1) 1010111100" source="22311" target="22246" cy:directed="1"/>
      <edge id="25787" label="0010110100 (1) 0010110000" source="22310" target="22504" cy:directed="1"/>
      <edge id="25786" label="0010110100 (1) 0010111100" source="22310" target="22243" cy:directed="1"/>
      <edge id="25785" label="1110110100 (1) 1110110000" source="22309" target="22503" cy:directed="1"/>
      <edge id="25784" label="1110110100 (1) 1110111100" source="22309" target="22230" cy:directed="1"/>
      <edge id="25783" label="1110110100 (1) 1010110100" source="22309" target="22311" cy:directed="1"/>
      <edge id="25782" label="1001011010 (1) 1001011110" source="22308" target="21961" cy:directed="1"/>
      <edge id="25781" label="1001011010 (1) 1001010010" source="22308" target="22463" cy:directed="1"/>
      <edge id="25780" label="1001011010 (1) 1001001010" source="22308" target="22418" cy:directed="1"/>
      <edge id="25779" label="1001011100 (1) 1001011110" source="22307" target="21961" cy:directed="1"/>
      <edge id="25778" label="1001011100 (1) 1001001100" source="22307" target="22210" cy:directed="1"/>
      <edge id="25777" label="1001011100 (1) 1011011100" source="22307" target="22296" cy:directed="1"/>
      <edge id="25776" label="0001011010 (1) 0001011110" source="22306" target="21960" cy:directed="1"/>
      <edge id="25775" label="0001011010 (1) 0001010010" source="22306" target="22461" cy:directed="1"/>
      <edge id="25774" label="0001011010 (1) 0001001010" source="22306" target="22416" cy:directed="1"/>
      <edge id="25773" label="0001011100 (1) 0001011110" source="22305" target="21960" cy:directed="1"/>
      <edge id="25772" label="0001011100 (1) 0001001100" source="22305" target="22205" cy:directed="1"/>
      <edge id="25771" label="0001011100 (1) 0011011100" source="22305" target="22292" cy:directed="1"/>
      <edge id="25770" label="0110110100 (1) 0110110000" source="22304" target="22502" cy:directed="1"/>
      <edge id="25769" label="0110110100 (1) 0110111100" source="22304" target="22229" cy:directed="1"/>
      <edge id="25768" label="0110110100 (1) 0010110100" source="22304" target="22310" cy:directed="1"/>
      <edge id="25767" label="1101011010 (1) 1101011110" source="22303" target="21951" cy:directed="1"/>
      <edge id="25766" label="1101011010 (1) 1101010010" source="22303" target="22459" cy:directed="1"/>
      <edge id="25765" label="1101011010 (1) 1101001010" source="22303" target="22414" cy:directed="1"/>
      <edge id="25764" label="1101011010 (1) 1101111010" source="22303" target="21905" cy:directed="1"/>
      <edge id="25763" label="1101011010 (1) 1001011010" source="22303" target="22308" cy:directed="1"/>
      <edge id="25762" label="1101011100 (1) 1101011110" source="22302" target="21951" cy:directed="1"/>
      <edge id="25761" label="1101011100 (1) 1101001100" source="22302" target="22194" cy:directed="1"/>
      <edge id="25760" label="1101011100 (1) 1101111100" source="22302" target="22183" cy:directed="1"/>
      <edge id="25759" label="1101011100 (1) 1001011100" source="22302" target="22307" cy:directed="1"/>
      <edge id="25758" label="0101011010 (1) 0101011110" source="22301" target="21949" cy:directed="1"/>
      <edge id="25757" label="0101011010 (1) 0101010010" source="22301" target="22457" cy:directed="1"/>
      <edge id="25756" label="0101011010 (1) 0101001010" source="22301" target="22411" cy:directed="1"/>
      <edge id="25755" label="0101011010 (1) 0101111010" source="22301" target="21901" cy:directed="1"/>
      <edge id="25754" label="0101011010 (1) 0001011010" source="22301" target="22306" cy:directed="1"/>
      <edge id="25753" label="0101011100 (1) 0101011110" source="22300" target="21949" cy:directed="1"/>
      <edge id="25752" label="0101011100 (1) 0101001100" source="22300" target="22190" cy:directed="1"/>
      <edge id="25751" label="0101011100 (1) 0101111100" source="22300" target="22182" cy:directed="1"/>
      <edge id="25750" label="0101011100 (1) 0001011100" source="22300" target="22305" cy:directed="1"/>
      <edge id="25749" label="1101100010 (1) 1101100000" source="22299" target="22532" cy:directed="1"/>
      <edge id="25748" label="1101100010 (1) 1101110010" source="22299" target="22167" cy:directed="1"/>
      <edge id="25747" label="1101100010 (1) 1111100010" source="22299" target="22268" cy:directed="1"/>
      <edge id="25746" label="1001110100 (1) 1001110000" source="22298" target="22501" cy:directed="1"/>
      <edge id="25745" label="1001110100 (1) 1001111100" source="22298" target="22193" cy:directed="1"/>
      <edge id="25744" label="1001110100 (1) 1011110100" source="22298" target="22267" cy:directed="1"/>
      <edge id="25743" label="1011011010 (1) 1011011110" source="22297" target="21918" cy:directed="1"/>
      <edge id="25742" label="1011011010 (1) 1011010010" source="22297" target="22442" cy:directed="1"/>
      <edge id="25741" label="1011011010 (1) 1011001010" source="22297" target="22408" cy:directed="1"/>
      <edge id="25740" label="1011011010 (1) 1010011010" source="22297" target="22323" cy:directed="1"/>
      <edge id="25739" label="1011011010 (1) 1001011010" source="22297" target="22308" cy:directed="1"/>
      <edge id="25738" label="1011011100 (1) 1011011110" source="22296" target="21918" cy:directed="1"/>
      <edge id="25737" label="1011011100 (1) 1011001100" source="22296" target="22142" cy:directed="1"/>
      <edge id="25736" label="1011011100 (1) 1010011100" source="22296" target="22322" cy:directed="1"/>
      <edge id="25735" label="0101100010 (1) 0101100000" source="22295" target="22530" cy:directed="1"/>
      <edge id="25734" label="0101100010 (1) 0101110010" source="22295" target="22161" cy:directed="1"/>
      <edge id="25733" label="0101100010 (1) 0111100010" source="22295" target="22264" cy:directed="1"/>
      <edge id="25732" label="0101100010 (1) 0001100010" source="22295" target="22248" cy:directed="1"/>
      <edge id="25731" label="0001110100 (1) 0001110000" source="22294" target="22495" cy:directed="1"/>
      <edge id="25730" label="0001110100 (1) 0001111100" source="22294" target="22189" cy:directed="1"/>
      <edge id="25729" label="0001110100 (1) 0011110100" source="22294" target="22265" cy:directed="1"/>
      <edge id="25728" label="0011011010 (1) 0011011110" source="22293" target="21916" cy:directed="1"/>
      <edge id="25727" label="0011011010 (1) 0011010010" source="22293" target="22439" cy:directed="1"/>
      <edge id="25726" label="0011011010 (1) 0011001010" source="22293" target="22399" cy:directed="1"/>
      <edge id="25725" label="0011011010 (1) 0010011010" source="22293" target="22320" cy:directed="1"/>
      <edge id="25724" label="0011011010 (1) 0001011010" source="22293" target="22306" cy:directed="1"/>
      <edge id="25723" label="0011011100 (1) 0011011110" source="22292" target="21916" cy:directed="1"/>
      <edge id="25722" label="0011011100 (1) 0011001100" source="22292" target="22140" cy:directed="1"/>
      <edge id="25721" label="0011011100 (1) 0010011100" source="22292" target="22319" cy:directed="1"/>
      <edge id="25720" label="0000010100 (1) 0000010110" source="22291" target="22290" cy:directed="1"/>
      <edge id="25719" label="0000010100 (1) 0000010000" source="22291" target="22493" cy:directed="1"/>
      <edge id="25718" label="0000010100 (1) 0000011100" source="22291" target="22340" cy:directed="1"/>
      <edge id="25717" label="0000010100 (1) 0000000100" source="22291" target="22398" cy:directed="1"/>
      <edge id="25716" label="0000010100 (1) 0000110100" source="22291" target="22318" cy:directed="1"/>
      <edge id="25715" label="0000010100 (1) 0001010100" source="22291" target="22289" cy:directed="1"/>
      <edge id="25714" label="0000010100 (1) 0010010100" source="22291" target="22288" cy:directed="1"/>
      <edge id="25713" label="0000010110 (1) 0000010010" source="22290" target="22492" cy:directed="1"/>
      <edge id="25712" label="0000010110 (1) 0000000110" source="22290" target="22397" cy:directed="1"/>
      <edge id="25711" label="0000010110 (1) 0000110110" source="22290" target="21880" cy:directed="1"/>
      <edge id="25710" label="0000010110 (1) 0001010110" source="22290" target="22221" cy:directed="1"/>
      <edge id="25709" label="0000010110 (1) 0010010110" source="22290" target="22263" cy:directed="1"/>
      <edge id="25708" label="0001010100 (1) 0001010110" source="22289" target="22221" cy:directed="1"/>
      <edge id="25707" label="0001010100 (1) 0001010000" source="22289" target="22490" cy:directed="1"/>
      <edge id="25706" label="0001010100 (1) 0001011100" source="22289" target="22305" cy:directed="1"/>
      <edge id="25705" label="0001010100 (1) 0001000100" source="22289" target="22395" cy:directed="1"/>
      <edge id="25704" label="0001010100 (1) 0001110100" source="22289" target="22294" cy:directed="1"/>
      <edge id="25703" label="0001010100 (1) 0011010100" source="22289" target="22220" cy:directed="1"/>
      <edge id="25702" label="0010010100 (1) 0010010110" source="22288" target="22263" cy:directed="1"/>
      <edge id="25701" label="0010010100 (1) 0010010000" source="22288" target="22474" cy:directed="1"/>
      <edge id="25700" label="0010010100 (1) 0010011100" source="22288" target="22319" cy:directed="1"/>
      <edge id="25699" label="0010010100 (1) 0010000100" source="22288" target="22394" cy:directed="1"/>
      <edge id="25698" label="0010010100 (1) 0010110100" source="22288" target="22310" cy:directed="1"/>
      <edge id="25697" label="1000010100 (1) 1000010110" source="22287" target="22286" cy:directed="1"/>
      <edge id="25696" label="1000010100 (1) 1000010000" source="22287" target="22499" cy:directed="1"/>
      <edge id="25695" label="1000010100 (1) 1000011100" source="22287" target="22342" cy:directed="1"/>
      <edge id="25694" label="1000010100 (1) 1000000100" source="22287" target="22406" cy:directed="1"/>
      <edge id="25693" label="1000010100 (1) 1000110100" source="22287" target="22321" cy:directed="1"/>
      <edge id="25692" label="1000010100 (1) 1001010100" source="22287" target="22285" cy:directed="1"/>
      <edge id="25691" label="1000010100 (1) 1010010100" source="22287" target="22284" cy:directed="1"/>
      <edge id="25690" label="1000010110 (1) 1000010010" source="22286" target="22498" cy:directed="1"/>
      <edge id="25689" label="1000010110 (1) 1000000110" source="22286" target="22405" cy:directed="1"/>
      <edge id="25688" label="1000010110 (1) 1000110110" source="22286" target="21881" cy:directed="1"/>
      <edge id="25687" label="1000010110 (1) 1001010110" source="22286" target="22219" cy:directed="1"/>
      <edge id="25686" label="1000010110 (1) 1010010110" source="22286" target="22262" cy:directed="1"/>
      <edge id="25685" label="1001010100 (1) 1001010110" source="22285" target="22219" cy:directed="1"/>
      <edge id="25684" label="1001010100 (1) 1001010000" source="22285" target="22496" cy:directed="1"/>
      <edge id="25683" label="1001010100 (1) 1001011100" source="22285" target="22307" cy:directed="1"/>
      <edge id="25682" label="1001010100 (1) 1001000100" source="22285" target="22403" cy:directed="1"/>
      <edge id="25681" label="1001010100 (1) 1001110100" source="22285" target="22298" cy:directed="1"/>
      <edge id="25680" label="1001010100 (1) 1011010100" source="22285" target="22218" cy:directed="1"/>
      <edge id="25679" label="1010010100 (1) 1010010110" source="22284" target="22262" cy:directed="1"/>
      <edge id="25678" label="1010010100 (1) 1010010000" source="22284" target="22478" cy:directed="1"/>
      <edge id="25677" label="1010010100 (1) 1010011100" source="22284" target="22322" cy:directed="1"/>
      <edge id="25676" label="1010010100 (1) 1010000100" source="22284" target="22402" cy:directed="1"/>
      <edge id="25675" label="1010010100 (1) 1010110100" source="22284" target="22311" cy:directed="1"/>
      <edge id="25674" label="1101110100 (1) 1101110000" source="22283" target="22489" cy:directed="1"/>
      <edge id="25673" label="1101110100 (1) 1101111100" source="22283" target="22183" cy:directed="1"/>
      <edge id="25672" label="1101110100 (1) 1111110100" source="22283" target="22261" cy:directed="1"/>
      <edge id="25671" label="1101110100 (1) 1001110100" source="22283" target="22298" cy:directed="1"/>
      <edge id="25670" label="0101110100 (1) 0101110000" source="22282" target="22484" cy:directed="1"/>
      <edge id="25669" label="0101110100 (1) 0101111100" source="22282" target="22182" cy:directed="1"/>
      <edge id="25668" label="0101110100 (1) 0111110100" source="22282" target="22260" cy:directed="1"/>
      <edge id="25667" label="0101110100 (1) 0001110100" source="22282" target="22294" cy:directed="1"/>
      <edge id="25666" label="0111011010 (1) 0111011110" source="22281" target="21911" cy:directed="1"/>
      <edge id="25665" label="0111011010 (1) 0111010010" source="22281" target="22436" cy:directed="1"/>
      <edge id="25664" label="0111011010 (1) 0111001010" source="22281" target="22381" cy:directed="1"/>
      <edge id="25663" label="0111011010 (1) 0111111010" source="22281" target="21866" cy:directed="1"/>
      <edge id="25662" label="0111011010 (1) 0110011010" source="22281" target="22314" cy:directed="1"/>
      <edge id="25661" label="0111011010 (1) 0101011010" source="22281" target="22301" cy:directed="1"/>
      <edge id="25660" label="0111011010 (1) 0011011010" source="22281" target="22293" cy:directed="1"/>
      <edge id="25659" label="0111011100 (1) 0111011110" source="22280" target="21911" cy:directed="1"/>
      <edge id="25658" label="0111011100 (1) 0111001100" source="22280" target="22100" cy:directed="1"/>
      <edge id="25657" label="0111011100 (1) 0111111100" source="22280" target="22156" cy:directed="1"/>
      <edge id="25656" label="0111011100 (1) 0110011100" source="22280" target="22313" cy:directed="1"/>
      <edge id="25655" label="0111011100 (1) 0101011100" source="22280" target="22300" cy:directed="1"/>
      <edge id="25654" label="0111011100 (1) 0011011100" source="22280" target="22292" cy:directed="1"/>
      <edge id="25653" label="1111011010 (1) 1111011110" source="22279" target="21910" cy:directed="1"/>
      <edge id="25652" label="1111011010 (1) 1111010010" source="22279" target="22433" cy:directed="1"/>
      <edge id="25651" label="1111011010 (1) 1111001010" source="22279" target="22389" cy:directed="1"/>
      <edge id="25650" label="1111011010 (1) 1111111010" source="22279" target="21876" cy:directed="1"/>
      <edge id="25649" label="1111011010 (1) 1110011010" source="22279" target="22317" cy:directed="1"/>
      <edge id="25648" label="1111011010 (1) 1101011010" source="22279" target="22303" cy:directed="1"/>
      <edge id="25647" label="1111011010 (1) 1011011010" source="22279" target="22297" cy:directed="1"/>
      <edge id="25646" label="1111011100 (1) 1111011110" source="22278" target="21910" cy:directed="1"/>
      <edge id="25645" label="1111011100 (1) 1111001100" source="22278" target="22111" cy:directed="1"/>
      <edge id="25644" label="1111011100 (1) 1111111100" source="22278" target="22157" cy:directed="1"/>
      <edge id="25643" label="1111011100 (1) 1110011100" source="22278" target="22316" cy:directed="1"/>
      <edge id="25642" label="1111011100 (1) 1101011100" source="22278" target="22302" cy:directed="1"/>
      <edge id="25641" label="1111011100 (1) 1011011100" source="22278" target="22296" cy:directed="1"/>
      <edge id="25640" label="0100010100 (1) 0100010110" source="22277" target="22276" cy:directed="1"/>
      <edge id="25639" label="0100010100 (1) 0100010000" source="22277" target="22483" cy:directed="1"/>
      <edge id="25638" label="0100010100 (1) 0100011100" source="22277" target="22331" cy:directed="1"/>
      <edge id="25637" label="0100010100 (1) 0100000100" source="22277" target="22386" cy:directed="1"/>
      <edge id="25636" label="0100010100 (1) 0100110100" source="22277" target="22312" cy:directed="1"/>
      <edge id="25635" label="0100010100 (1) 0101010100" source="22277" target="22275" cy:directed="1"/>
      <edge id="25634" label="0100010100 (1) 0000010100" source="22277" target="22291" cy:directed="1"/>
      <edge id="25633" label="0100010110 (1) 0100010010" source="22276" target="22482" cy:directed="1"/>
      <edge id="25632" label="0100010110 (1) 0100000110" source="22276" target="22385" cy:directed="1"/>
      <edge id="25631" label="0100010110 (1) 0100110110" source="22276" target="21875" cy:directed="1"/>
      <edge id="25630" label="0100010110 (1) 0101010110" source="22276" target="22215" cy:directed="1"/>
      <edge id="25629" label="0100010110 (1) 0000010110" source="22276" target="22290" cy:directed="1"/>
      <edge id="25628" label="0101010100 (1) 0101010110" source="22275" target="22215" cy:directed="1"/>
      <edge id="25627" label="0101010100 (1) 0101010000" source="22275" target="22480" cy:directed="1"/>
      <edge id="25626" label="0101010100 (1) 0101011100" source="22275" target="22300" cy:directed="1"/>
      <edge id="25625" label="0101010100 (1) 0101000100" source="22275" target="22383" cy:directed="1"/>
      <edge id="25624" label="0101010100 (1) 0101110100" source="22275" target="22282" cy:directed="1"/>
      <edge id="25623" label="0101010100 (1) 0001010100" source="22275" target="22289" cy:directed="1"/>
      <edge id="25622" label="1100010100 (1) 1100010110" source="22274" target="22273" cy:directed="1"/>
      <edge id="25621" label="1100010100 (1) 1100010000" source="22274" target="22488" cy:directed="1"/>
      <edge id="25620" label="1100010100 (1) 1100011100" source="22274" target="22336" cy:directed="1"/>
      <edge id="25619" label="1100010100 (1) 1100000100" source="22274" target="22401" cy:directed="1"/>
      <edge id="25618" label="1100010100 (1) 1100110100" source="22274" target="22315" cy:directed="1"/>
      <edge id="25617" label="1100010100 (1) 1101010100" source="22274" target="22272" cy:directed="1"/>
      <edge id="25616" label="1100010100 (1) 1000010100" source="22274" target="22287" cy:directed="1"/>
      <edge id="25615" label="1100010110 (1) 1100010010" source="22273" target="22487" cy:directed="1"/>
      <edge id="25614" label="1100010110 (1) 1100000110" source="22273" target="22393" cy:directed="1"/>
      <edge id="25613" label="1100010110 (1) 1100110110" source="22273" target="21877" cy:directed="1"/>
      <edge id="25612" label="1100010110 (1) 1101010110" source="22273" target="22214" cy:directed="1"/>
      <edge id="25611" label="1100010110 (1) 1000010110" source="22273" target="22286" cy:directed="1"/>
      <edge id="25610" label="1101010100 (1) 1101010110" source="22272" target="22214" cy:directed="1"/>
      <edge id="25609" label="1101010100 (1) 1101010000" source="22272" target="22485" cy:directed="1"/>
      <edge id="25608" label="1101010100 (1) 1101011100" source="22272" target="22302" cy:directed="1"/>
      <edge id="25607" label="1101010100 (1) 1101000100" source="22272" target="22391" cy:directed="1"/>
      <edge id="25606" label="1101010100 (1) 1101110100" source="22272" target="22283" cy:directed="1"/>
      <edge id="25605" label="1101010100 (1) 1001010100" source="22272" target="22285" cy:directed="1"/>
      <edge id="25604" label="1000111100 (1) 1000011100" source="22271" target="22342" cy:directed="1"/>
      <edge id="25603" label="1000111100 (1) 1001111100" source="22271" target="22193" cy:directed="1"/>
      <edge id="25602" label="1000111100 (1) 1010111100" source="22271" target="22246" cy:directed="1"/>
      <edge id="25601" label="0000111100 (1) 0000011100" source="22270" target="22340" cy:directed="1"/>
      <edge id="25600" label="0000111100 (1) 0001111100" source="22270" target="22189" cy:directed="1"/>
      <edge id="25599" label="0000111100 (1) 0010111100" source="22270" target="22243" cy:directed="1"/>
      <edge id="25598" label="1100111100 (1) 1100011100" source="22269" target="22336" cy:directed="1"/>
      <edge id="25597" label="1100111100 (1) 1101111100" source="22269" target="22183" cy:directed="1"/>
      <edge id="25596" label="1100111100 (1) 1110111100" source="22269" target="22230" cy:directed="1"/>
      <edge id="25595" label="1100111100 (1) 1000111100" source="22269" target="22271" cy:directed="1"/>
      <edge id="25594" label="1111100010 (1) 1111100000" source="22268" target="22523" cy:directed="1"/>
      <edge id="25593" label="1111100010 (1) 1111110010" source="22268" target="22144" cy:directed="1"/>
      <edge id="25592" label="1111100010 (1) 1110100010" source="22268" target="22244" cy:directed="1"/>
      <edge id="25591" label="1011110100 (1) 1011110000" source="22267" target="22479" cy:directed="1"/>
      <edge id="25590" label="1011110100 (1) 1011111100" source="22267" target="22162" cy:directed="1"/>
      <edge id="25589" label="1011110100 (1) 1010110100" source="22267" target="22311" cy:directed="1"/>
      <edge id="25588" label="0100111100 (1) 0100011100" source="22266" target="22331" cy:directed="1"/>
      <edge id="25587" label="0100111100 (1) 0101111100" source="22266" target="22182" cy:directed="1"/>
      <edge id="25586" label="0100111100 (1) 0110111100" source="22266" target="22229" cy:directed="1"/>
      <edge id="25585" label="0100111100 (1) 0000111100" source="22266" target="22270" cy:directed="1"/>
      <edge id="25584" label="0011110100 (1) 0011110000" source="22265" target="22475" cy:directed="1"/>
      <edge id="25583" label="0011110100 (1) 0011111100" source="22265" target="22158" cy:directed="1"/>
      <edge id="25582" label="0011110100 (1) 0010110100" source="22265" target="22310" cy:directed="1"/>
      <edge id="25581" label="0111100010 (1) 0111100000" source="22264" target="22520" cy:directed="1"/>
      <edge id="25580" label="0111100010 (1) 0111110010" source="22264" target="22139" cy:directed="1"/>
      <edge id="25579" label="0111100010 (1) 0110100010" source="22264" target="22240" cy:directed="1"/>
      <edge id="25578" label="0111100010 (1) 0011100010" source="22264" target="22169" cy:directed="1"/>
      <edge id="25577" label="0010010110 (1) 0010010010" source="22263" target="22473" cy:directed="1"/>
      <edge id="25576" label="0010010110 (1) 0010000110" source="22263" target="22367" cy:directed="1"/>
      <edge id="25575" label="0010010110 (1) 0010110110" source="22263" target="21846" cy:directed="1"/>
      <edge id="25574" label="1010010110 (1) 1010010010" source="22262" target="22477" cy:directed="1"/>
      <edge id="25573" label="1010010110 (1) 1010000110" source="22262" target="22370" cy:directed="1"/>
      <edge id="25572" label="1010010110 (1) 1010110110" source="22262" target="21847" cy:directed="1"/>
      <edge id="25571" label="1111110100 (1) 1111110000" source="22261" target="22471" cy:directed="1"/>
      <edge id="25570" label="1111110100 (1) 1111111100" source="22261" target="22157" cy:directed="1"/>
      <edge id="25569" label="1111110100 (1) 1110110100" source="22261" target="22309" cy:directed="1"/>
      <edge id="25568" label="1111110100 (1) 1011110100" source="22261" target="22267" cy:directed="1"/>
      <edge id="25567" label="0111110100 (1) 0111110000" source="22260" target="22467" cy:directed="1"/>
      <edge id="25566" label="0111110100 (1) 0111111100" source="22260" target="22156" cy:directed="1"/>
      <edge id="25565" label="0111110100 (1) 0110110100" source="22260" target="22304" cy:directed="1"/>
      <edge id="25564" label="0111110100 (1) 0011110100" source="22260" target="22265" cy:directed="1"/>
      <edge id="25563" label="0110010100 (1) 0110010110" source="22259" target="22258" cy:directed="1"/>
      <edge id="25562" label="0110010100 (1) 0110010000" source="22259" target="22466" cy:directed="1"/>
      <edge id="25561" label="0110010100 (1) 0110011100" source="22259" target="22313" cy:directed="1"/>
      <edge id="25560" label="0110010100 (1) 0110000100" source="22259" target="22358" cy:directed="1"/>
      <edge id="25559" label="0110010100 (1) 0110110100" source="22259" target="22304" cy:directed="1"/>
      <edge id="25558" label="0110010100 (1) 0100010100" source="22259" target="22277" cy:directed="1"/>
      <edge id="25557" label="0110010100 (1) 0010010100" source="22259" target="22288" cy:directed="1"/>
      <edge id="25556" label="0110010110 (1) 0110010010" source="22258" target="22465" cy:directed="1"/>
      <edge id="25555" label="0110010110 (1) 0110000110" source="22258" target="22357" cy:directed="1"/>
      <edge id="25554" label="0110010110 (1) 0110110110" source="22258" target="21835" cy:directed="1"/>
      <edge id="25553" label="0110010110 (1) 0100010110" source="22258" target="22276" cy:directed="1"/>
      <edge id="25552" label="0110010110 (1) 0010010110" source="22258" target="22263" cy:directed="1"/>
      <edge id="25551" label="1110010100 (1) 1110010110" source="22257" target="22256" cy:directed="1"/>
      <edge id="25550" label="1110010100 (1) 1110010000" source="22257" target="22470" cy:directed="1"/>
      <edge id="25549" label="1110010100 (1) 1110011100" source="22257" target="22316" cy:directed="1"/>
      <edge id="25548" label="1110010100 (1) 1110000100" source="22257" target="22368" cy:directed="1"/>
      <edge id="25547" label="1110010100 (1) 1110110100" source="22257" target="22309" cy:directed="1"/>
      <edge id="25546" label="1110010100 (1) 1100010100" source="22257" target="22274" cy:directed="1"/>
      <edge id="25545" label="1110010100 (1) 1010010100" source="22257" target="22284" cy:directed="1"/>
      <edge id="25544" label="1110010110 (1) 1110010010" source="22256" target="22469" cy:directed="1"/>
      <edge id="25543" label="1110010110 (1) 1110000110" source="22256" target="22362" cy:directed="1"/>
      <edge id="25542" label="1110010110 (1) 1110110110" source="22256" target="21836" cy:directed="1"/>
      <edge id="25541" label="1110010110 (1) 1100010110" source="22256" target="22273" cy:directed="1"/>
      <edge id="25540" label="1110010110 (1) 1010010110" source="22256" target="22262" cy:directed="1"/>
      <edge id="25539" label="1000100010 (1) 1000100000" source="22255" target="22519" cy:directed="1"/>
      <edge id="25538" label="1000100010 (1) 1000110010" source="22255" target="22254" cy:directed="1"/>
      <edge id="25537" label="1000100010 (1) 1000000010" source="22255" target="22551" cy:directed="1"/>
      <edge id="25536" label="1000100010 (1) 1001100010" source="22255" target="22253" cy:directed="1"/>
      <edge id="25535" label="1000100010 (1) 1010100010" source="22255" target="22252" cy:directed="1"/>
      <edge id="25534" label="1000100010 (1) 1100100010" source="22255" target="22251" cy:directed="1"/>
      <edge id="25533" label="1000110010 (1) 1000110000" source="22254" target="22518" cy:directed="1"/>
      <edge id="25532" label="1000110010 (1) 1000010010" source="22254" target="22498" cy:directed="1"/>
      <edge id="25531" label="1000110010 (1) 1001110010" source="22254" target="22173" cy:directed="1"/>
      <edge id="25530" label="1000110010 (1) 1010110010" source="22254" target="22217" cy:directed="1"/>
      <edge id="25529" label="1001100010 (1) 1001100000" source="22253" target="22517" cy:directed="1"/>
      <edge id="25528" label="1001100010 (1) 1001110010" source="22253" target="22173" cy:directed="1"/>
      <edge id="25527" label="1001100010 (1) 1001000010" source="22253" target="22534" cy:directed="1"/>
      <edge id="25526" label="1001100010 (1) 1011100010" source="22253" target="22172" cy:directed="1"/>
      <edge id="25525" label="1001100010 (1) 1101100010" source="22253" target="22299" cy:directed="1"/>
      <edge id="25524" label="1010100010 (1) 1010100000" source="22252" target="22516" cy:directed="1"/>
      <edge id="25523" label="1010100010 (1) 1010110010" source="22252" target="22217" cy:directed="1"/>
      <edge id="25522" label="1010100010 (1) 1010000010" source="22252" target="22542" cy:directed="1"/>
      <edge id="25521" label="1010100010 (1) 1110100010" source="22252" target="22244" cy:directed="1"/>
      <edge id="25520" label="1100100010 (1) 1100100000" source="22251" target="22515" cy:directed="1"/>
      <edge id="25519" label="1100100010 (1) 1100110010" source="22251" target="22245" cy:directed="1"/>
      <edge id="25518" label="1100100010 (1) 1100000010" source="22251" target="22548" cy:directed="1"/>
      <edge id="25517" label="1100100010 (1) 1101100010" source="22251" target="22299" cy:directed="1"/>
      <edge id="25516" label="1100100010 (1) 1110100010" source="22251" target="22244" cy:directed="1"/>
      <edge id="25515" label="0000100010 (1) 0000100000" source="22250" target="22514" cy:directed="1"/>
      <edge id="25514" label="0000100010 (1) 0000110010" source="22250" target="22249" cy:directed="1"/>
      <edge id="25513" label="0000100010 (1) 0000000010" source="22250" target="22554" cy:directed="1"/>
      <edge id="25512" label="0000100010 (1) 0001100010" source="22250" target="22248" cy:directed="1"/>
      <edge id="25511" label="0000100010 (1) 0010100010" source="22250" target="22247" cy:directed="1"/>
      <edge id="25510" label="0000110010 (1) 0000110000" source="22249" target="22513" cy:directed="1"/>
      <edge id="25509" label="0000110010 (1) 0000010010" source="22249" target="22492" cy:directed="1"/>
      <edge id="25508" label="0000110010 (1) 0001110010" source="22249" target="22170" cy:directed="1"/>
      <edge id="25507" label="0000110010 (1) 0010110010" source="22249" target="22216" cy:directed="1"/>
      <edge id="25506" label="0001100010 (1) 0001100000" source="22248" target="22512" cy:directed="1"/>
      <edge id="25505" label="0001100010 (1) 0001110010" source="22248" target="22170" cy:directed="1"/>
      <edge id="25504" label="0001100010 (1) 0001000010" source="22248" target="22535" cy:directed="1"/>
      <edge id="25503" label="0001100010 (1) 0011100010" source="22248" target="22169" cy:directed="1"/>
      <edge id="25502" label="0010100010 (1) 0010100000" source="22247" target="22511" cy:directed="1"/>
      <edge id="25501" label="0010100010 (1) 0010110010" source="22247" target="22216" cy:directed="1"/>
      <edge id="25500" label="0010100010 (1) 0010000010" source="22247" target="22539" cy:directed="1"/>
      <edge id="25499" label="1010111100 (1) 1010011100" source="22246" target="22322" cy:directed="1"/>
      <edge id="25498" label="1100110010 (1) 1100110000" source="22245" target="22510" cy:directed="1"/>
      <edge id="25497" label="1100110010 (1) 1100010010" source="22245" target="22487" cy:directed="1"/>
      <edge id="25496" label="1100110010 (1) 1101110010" source="22245" target="22167" cy:directed="1"/>
      <edge id="25495" label="1100110010 (1) 1110110010" source="22245" target="22213" cy:directed="1"/>
      <edge id="25494" label="1100110010 (1) 1000110010" source="22245" target="22254" cy:directed="1"/>
      <edge id="25493" label="1110100010 (1) 1110100000" source="22244" target="22509" cy:directed="1"/>
      <edge id="25492" label="1110100010 (1) 1110110010" source="22244" target="22213" cy:directed="1"/>
      <edge id="25491" label="1110100010 (1) 1110000010" source="22244" target="22538" cy:directed="1"/>
      <edge id="25490" label="0010111100 (1) 0010011100" source="22243" target="22319" cy:directed="1"/>
      <edge id="25489" label="0100100010 (1) 0100100000" source="22242" target="22508" cy:directed="1"/>
      <edge id="25488" label="0100100010 (1) 0100110010" source="22242" target="22241" cy:directed="1"/>
      <edge id="25487" label="0100100010 (1) 0100000010" source="22242" target="22545" cy:directed="1"/>
      <edge id="25486" label="0100100010 (1) 0101100010" source="22242" target="22295" cy:directed="1"/>
      <edge id="25485" label="0100100010 (1) 0110100010" source="22242" target="22240" cy:directed="1"/>
      <edge id="25484" label="0100100010 (1) 0000100010" source="22242" target="22250" cy:directed="1"/>
      <edge id="25483" label="0100110010 (1) 0100110000" source="22241" target="22507" cy:directed="1"/>
      <edge id="25482" label="0100110010 (1) 0100010010" source="22241" target="22482" cy:directed="1"/>
      <edge id="25481" label="0100110010 (1) 0101110010" source="22241" target="22161" cy:directed="1"/>
      <edge id="25480" label="0100110010 (1) 0110110010" source="22241" target="22203" cy:directed="1"/>
      <edge id="25479" label="0100110010 (1) 0000110010" source="22241" target="22249" cy:directed="1"/>
      <edge id="25478" label="0110100010 (1) 0110100000" source="22240" target="22506" cy:directed="1"/>
      <edge id="25477" label="0110100010 (1) 0110110010" source="22240" target="22203" cy:directed="1"/>
      <edge id="25476" label="0110100010 (1) 0110000010" source="22240" target="22536" cy:directed="1"/>
      <edge id="25475" label="0110100010 (1) 0010100010" source="22240" target="22247" cy:directed="1"/>
      <edge id="25474" label="0000000001 (1) 0000000011" source="22239" target="22238" cy:directed="1"/>
      <edge id="25473" label="0000000001 (1) 0000000101" source="22239" target="22237" cy:directed="1"/>
      <edge id="25472" label="0000000001 (1) 0001000001" source="22239" target="22236" cy:directed="1"/>
      <edge id="25471" label="0000000011 (1) 0000000111" source="22238" target="21865" cy:directed="1"/>
      <edge id="25470" label="0000000011 (1) 0001000011" source="22238" target="22166" cy:directed="1"/>
      <edge id="25469" label="0000000101 (1) 0000000111" source="22237" target="21865" cy:directed="1"/>
      <edge id="25468" label="0000000101 (1) 0000100101" source="22237" target="22122" cy:directed="1"/>
      <edge id="25467" label="0000000101 (1) 0001000101" source="22237" target="22165" cy:directed="1"/>
      <edge id="25466" label="0000000101 (1) 0010000101" source="22237" target="22196" cy:directed="1"/>
      <edge id="25465" label="0001000001 (1) 0001000011" source="22236" target="22166" cy:directed="1"/>
      <edge id="25464" label="0001000001 (1) 0001000101" source="22236" target="22165" cy:directed="1"/>
      <edge id="25463" label="1000000001 (1) 1000000011" source="22235" target="22234" cy:directed="1"/>
      <edge id="25462" label="1000000001 (1) 1000000101" source="22235" target="22233" cy:directed="1"/>
      <edge id="25461" label="1000000001 (1) 1001000001" source="22235" target="22232" cy:directed="1"/>
      <edge id="25460" label="1000000001 (1) 1100000001" source="22235" target="22231" cy:directed="1"/>
      <edge id="25459" label="1000000011 (1) 1000000111" source="22234" target="21870" cy:directed="1"/>
      <edge id="25458" label="1000000011 (1) 1001000011" source="22234" target="22164" cy:directed="1"/>
      <edge id="25457" label="1000000011 (1) 1100000011" source="22234" target="22228" cy:directed="1"/>
      <edge id="25456" label="1000000101 (1) 1000000111" source="22233" target="21870" cy:directed="1"/>
      <edge id="25455" label="1000000101 (1) 1000100101" source="22233" target="22117" cy:directed="1"/>
      <edge id="25454" label="1000000101 (1) 1001000101" source="22233" target="22163" cy:directed="1"/>
      <edge id="25453" label="1000000101 (1) 1010000101" source="22233" target="22200" cy:directed="1"/>
      <edge id="25452" label="1000000101 (1) 1100000101" source="22233" target="22227" cy:directed="1"/>
      <edge id="25451" label="1001000001 (1) 1001000011" source="22232" target="22164" cy:directed="1"/>
      <edge id="25450" label="1001000001 (1) 1001000101" source="22232" target="22163" cy:directed="1"/>
      <edge id="25449" label="1001000001 (1) 1101000001" source="22232" target="22226" cy:directed="1"/>
      <edge id="25448" label="1100000001 (1) 1100000011" source="22231" target="22228" cy:directed="1"/>
      <edge id="25447" label="1100000001 (1) 1100000101" source="22231" target="22227" cy:directed="1"/>
      <edge id="25446" label="1100000001 (1) 1101000001" source="22231" target="22226" cy:directed="1"/>
      <edge id="25445" label="1110111100 (1) 1110011100" source="22230" target="22316" cy:directed="1"/>
      <edge id="25444" label="1110111100 (1) 1010111100" source="22230" target="22246" cy:directed="1"/>
      <edge id="25443" label="0110111100 (1) 0110011100" source="22229" target="22313" cy:directed="1"/>
      <edge id="25442" label="0110111100 (1) 0010111100" source="22229" target="22243" cy:directed="1"/>
      <edge id="25441" label="1100000011 (1) 1100000111" source="22228" target="21864" cy:directed="1"/>
      <edge id="25440" label="1100000011 (1) 1101000011" source="22228" target="22155" cy:directed="1"/>
      <edge id="25439" label="1100000101 (1) 1100000111" source="22227" target="21864" cy:directed="1"/>
      <edge id="25438" label="1100000101 (1) 1100100101" source="22227" target="22109" cy:directed="1"/>
      <edge id="25437" label="1100000101 (1) 1101000101" source="22227" target="22154" cy:directed="1"/>
      <edge id="25436" label="1101000001 (1) 1101000011" source="22226" target="22155" cy:directed="1"/>
      <edge id="25435" label="1101000001 (1) 1101000101" source="22226" target="22154" cy:directed="1"/>
      <edge id="25434" label="1101000001 (1) 1101100001" source="22226" target="22153" cy:directed="1"/>
      <edge id="25433" label="0100000001 (1) 0100000011" source="22225" target="22224" cy:directed="1"/>
      <edge id="25432" label="0100000001 (1) 0100000101" source="22225" target="22223" cy:directed="1"/>
      <edge id="25431" label="0100000001 (1) 0101000001" source="22225" target="22222" cy:directed="1"/>
      <edge id="25430" label="0100000001 (1) 0000000001" source="22225" target="22239" cy:directed="1"/>
      <edge id="25429" label="0100000011 (1) 0100000111" source="22224" target="21858" cy:directed="1"/>
      <edge id="25428" label="0100000011 (1) 0101000011" source="22224" target="22152" cy:directed="1"/>
      <edge id="25427" label="0100000011 (1) 0000000011" source="22224" target="22238" cy:directed="1"/>
      <edge id="25426" label="0100000101 (1) 0100000111" source="22223" target="21858" cy:directed="1"/>
      <edge id="25425" label="0100000101 (1) 0100100101" source="22223" target="22105" cy:directed="1"/>
      <edge id="25424" label="0100000101 (1) 0101000101" source="22223" target="22151" cy:directed="1"/>
      <edge id="25423" label="0100000101 (1) 0000000101" source="22223" target="22237" cy:directed="1"/>
      <edge id="25422" label="0101000001 (1) 0101000011" source="22222" target="22152" cy:directed="1"/>
      <edge id="25421" label="0101000001 (1) 0101000101" source="22222" target="22151" cy:directed="1"/>
      <edge id="25420" label="0101000001 (1) 0101100001" source="22222" target="22150" cy:directed="1"/>
      <edge id="25419" label="0101000001 (1) 0001000001" source="22222" target="22236" cy:directed="1"/>
      <edge id="25418" label="0001010110 (1) 0001010010" source="22221" target="22461" cy:directed="1"/>
      <edge id="25417" label="0001010110 (1) 0001000110" source="22221" target="22350" cy:directed="1"/>
      <edge id="25416" label="0001010110 (1) 0001110110" source="22221" target="21814" cy:directed="1"/>
      <edge id="25415" label="0001010110 (1) 0011010110" source="22221" target="22181" cy:directed="1"/>
      <edge id="25414" label="0011010100 (1) 0011010110" source="22220" target="22181" cy:directed="1"/>
      <edge id="25413" label="0011010100 (1) 0011010000" source="22220" target="22440" cy:directed="1"/>
      <edge id="25412" label="0011010100 (1) 0011011100" source="22220" target="22292" cy:directed="1"/>
      <edge id="25411" label="0011010100 (1) 0011000100" source="22220" target="22348" cy:directed="1"/>
      <edge id="25410" label="0011010100 (1) 0011110100" source="22220" target="22265" cy:directed="1"/>
      <edge id="25409" label="0011010100 (1) 0010010100" source="22220" target="22288" cy:directed="1"/>
      <edge id="25408" label="1001010110 (1) 1001010010" source="22219" target="22463" cy:directed="1"/>
      <edge id="25407" label="1001010110 (1) 1001000110" source="22219" target="22353" cy:directed="1"/>
      <edge id="25406" label="1001010110 (1) 1001110110" source="22219" target="21815" cy:directed="1"/>
      <edge id="25405" label="1001010110 (1) 1011010110" source="22219" target="22180" cy:directed="1"/>
      <edge id="25404" label="1011010100 (1) 1011010110" source="22218" target="22180" cy:directed="1"/>
      <edge id="25403" label="1011010100 (1) 1011010000" source="22218" target="22443" cy:directed="1"/>
      <edge id="25402" label="1011010100 (1) 1011011100" source="22218" target="22296" cy:directed="1"/>
      <edge id="25401" label="1011010100 (1) 1011000100" source="22218" target="22351" cy:directed="1"/>
      <edge id="25400" label="1011010100 (1) 1011110100" source="22218" target="22267" cy:directed="1"/>
      <edge id="25399" label="1011010100 (1) 1010010100" source="22218" target="22284" cy:directed="1"/>
      <edge id="25398" label="1010110010 (1) 1010110000" source="22217" target="22505" cy:directed="1"/>
      <edge id="25397" label="1010110010 (1) 1010010010" source="22217" target="22477" cy:directed="1"/>
      <edge id="25396" label="0010110010 (1) 0010110000" source="22216" target="22504" cy:directed="1"/>
      <edge id="25395" label="0010110010 (1) 0010010010" source="22216" target="22473" cy:directed="1"/>
      <edge id="25394" label="0101010110 (1) 0101010010" source="22215" target="22457" cy:directed="1"/>
      <edge id="25393" label="0101010110 (1) 0101000110" source="22215" target="22345" cy:directed="1"/>
      <edge id="25392" label="0101010110 (1) 0101110110" source="22215" target="21809" cy:directed="1"/>
      <edge id="25391" label="0101010110 (1) 0001010110" source="22215" target="22221" cy:directed="1"/>
      <edge id="25390" label="1101010110 (1) 1101010010" source="22214" target="22459" cy:directed="1"/>
      <edge id="25389" label="1101010110 (1) 1101000110" source="22214" target="22347" cy:directed="1"/>
      <edge id="25388" label="1101010110 (1) 1101110110" source="22214" target="21811" cy:directed="1"/>
      <edge id="25387" label="1101010110 (1) 1001010110" source="22214" target="22219" cy:directed="1"/>
      <edge id="25386" label="1110110010 (1) 1110110000" source="22213" target="22503" cy:directed="1"/>
      <edge id="25385" label="1110110010 (1) 1110010010" source="22213" target="22469" cy:directed="1"/>
      <edge id="25384" label="1110110010 (1) 1010110010" source="22213" target="22217" cy:directed="1"/>
      <edge id="25383" label="1000001100 (1) 1000001110" source="22212" target="22211" cy:directed="1"/>
      <edge id="25382" label="1000001100 (1) 1000001000" source="22212" target="22455" cy:directed="1"/>
      <edge id="25381" label="1000001100 (1) 1000000100" source="22212" target="22406" cy:directed="1"/>
      <edge id="25380" label="1000001100 (1) 1001001100" source="22212" target="22210" cy:directed="1"/>
      <edge id="25379" label="1000001100 (1) 1010001100" source="22212" target="22209" cy:directed="1"/>
      <edge id="25378" label="1000001100 (1) 1100001100" source="22212" target="22208" cy:directed="1"/>
      <edge id="25377" label="1000001110 (1) 1000001010" source="22211" target="22454" cy:directed="1"/>
      <edge id="25376" label="1000001110 (1) 1000000110" source="22211" target="22405" cy:directed="1"/>
      <edge id="25375" label="1000001110 (1) 1001001110" source="22211" target="22143" cy:directed="1"/>
      <edge id="25374" label="1000001110 (1) 1010001110" source="22211" target="22175" cy:directed="1"/>
      <edge id="25373" label="1000001110 (1) 1100001110" source="22211" target="22195" cy:directed="1"/>
      <edge id="25372" label="1001001100 (1) 1001001110" source="22210" target="22143" cy:directed="1"/>
      <edge id="25371" label="1001001100 (1) 1001001000" source="22210" target="22453" cy:directed="1"/>
      <edge id="25370" label="1001001100 (1) 1001000100" source="22210" target="22403" cy:directed="1"/>
      <edge id="25369" label="1001001100 (1) 1011001100" source="22210" target="22142" cy:directed="1"/>
      <edge id="25368" label="1001001100 (1) 1101001100" source="22210" target="22194" cy:directed="1"/>
      <edge id="25367" label="1010001100 (1) 1010001110" source="22209" target="22175" cy:directed="1"/>
      <edge id="25366" label="1010001100 (1) 1010001000" source="22209" target="22431" cy:directed="1"/>
      <edge id="25365" label="1010001100 (1) 1010000100" source="22209" target="22402" cy:directed="1"/>
      <edge id="25364" label="1010001100 (1) 1110001100" source="22209" target="22174" cy:directed="1"/>
      <edge id="25363" label="1100001100 (1) 1100001110" source="22208" target="22195" cy:directed="1"/>
      <edge id="25362" label="1100001100 (1) 1100001000" source="22208" target="22452" cy:directed="1"/>
      <edge id="25361" label="1100001100 (1) 1100000100" source="22208" target="22401" cy:directed="1"/>
      <edge id="25360" label="1100001100 (1) 1101001100" source="22208" target="22194" cy:directed="1"/>
      <edge id="25359" label="0000001100 (1) 0000001110" source="22207" target="22206" cy:directed="1"/>
      <edge id="25358" label="0000001100 (1) 0000001000" source="22207" target="22451" cy:directed="1"/>
      <edge id="25357" label="0000001100 (1) 0000000100" source="22207" target="22398" cy:directed="1"/>
      <edge id="25356" label="0000001100 (1) 0001001100" source="22207" target="22205" cy:directed="1"/>
      <edge id="25355" label="0000001100 (1) 0010001100" source="22207" target="22204" cy:directed="1"/>
      <edge id="25354" label="0000001110 (1) 0000001010" source="22206" target="22450" cy:directed="1"/>
      <edge id="25353" label="0000001110 (1) 0000000110" source="22206" target="22397" cy:directed="1"/>
      <edge id="25352" label="0000001110 (1) 0001001110" source="22206" target="22141" cy:directed="1"/>
      <edge id="25351" label="0000001110 (1) 0010001110" source="22206" target="22171" cy:directed="1"/>
      <edge id="25350" label="0001001100 (1) 0001001110" source="22205" target="22141" cy:directed="1"/>
      <edge id="25349" label="0001001100 (1) 0001001000" source="22205" target="22449" cy:directed="1"/>
      <edge id="25348" label="0001001100 (1) 0001000100" source="22205" target="22395" cy:directed="1"/>
      <edge id="25347" label="0001001100 (1) 0011001100" source="22205" target="22140" cy:directed="1"/>
      <edge id="25346" label="0010001100 (1) 0010001110" source="22204" target="22171" cy:directed="1"/>
      <edge id="25345" label="0010001100 (1) 0010001000" source="22204" target="22428" cy:directed="1"/>
      <edge id="25344" label="0010001100 (1) 0010000100" source="22204" target="22394" cy:directed="1"/>
      <edge id="25343" label="0110110010 (1) 0110110000" source="22203" target="22502" cy:directed="1"/>
      <edge id="25342" label="0110110010 (1) 0110010010" source="22203" target="22465" cy:directed="1"/>
      <edge id="25341" label="0110110010 (1) 0010110010" source="22203" target="22216" cy:directed="1"/>
      <edge id="25340" label="1010000001 (1) 1010000011" source="22202" target="22201" cy:directed="1"/>
      <edge id="25339" label="1010000001 (1) 1010000101" source="22202" target="22200" cy:directed="1"/>
      <edge id="25338" label="1010000001 (1) 1000000001" source="22202" target="22235" cy:directed="1"/>
      <edge id="25337" label="1010000001 (1) 1110000001" source="22202" target="22199" cy:directed="1"/>
      <edge id="25336" label="1010000011 (1) 1010000111" source="22201" target="21833" cy:directed="1"/>
      <edge id="25335" label="1010000011 (1) 1000000011" source="22201" target="22234" cy:directed="1"/>
      <edge id="25334" label="1010000011 (1) 1110000011" source="22201" target="22188" cy:directed="1"/>
      <edge id="25333" label="1010000101 (1) 1010000111" source="22200" target="21833" cy:directed="1"/>
      <edge id="25332" label="1010000101 (1) 1010100101" source="22200" target="22088" cy:directed="1"/>
      <edge id="25331" label="1010000101 (1) 1110000101" source="22200" target="22187" cy:directed="1"/>
      <edge id="25330" label="1110000001 (1) 1110000011" source="22199" target="22188" cy:directed="1"/>
      <edge id="25329" label="1110000001 (1) 1110000101" source="22199" target="22187" cy:directed="1"/>
      <edge id="25328" label="1110000001 (1) 1100000001" source="22199" target="22231" cy:directed="1"/>
      <edge id="25327" label="0010000001 (1) 0010000011" source="22198" target="22197" cy:directed="1"/>
      <edge id="25326" label="0010000001 (1) 0010000101" source="22198" target="22196" cy:directed="1"/>
      <edge id="25325" label="0010000001 (1) 0000000001" source="22198" target="22239" cy:directed="1"/>
      <edge id="25324" label="0010000011 (1) 0010000111" source="22197" target="21834" cy:directed="1"/>
      <edge id="25323" label="0010000011 (1) 0000000011" source="22197" target="22238" cy:directed="1"/>
      <edge id="25322" label="0010000101 (1) 0010000111" source="22196" target="21834" cy:directed="1"/>
      <edge id="25321" label="0010000101 (1) 0010100101" source="22196" target="22090" cy:directed="1"/>
      <edge id="25320" label="1100001110 (1) 1100001010" source="22195" target="22448" cy:directed="1"/>
      <edge id="25319" label="1100001110 (1) 1100000110" source="22195" target="22393" cy:directed="1"/>
      <edge id="25318" label="1100001110 (1) 1101001110" source="22195" target="22134" cy:directed="1"/>
      <edge id="25317" label="1101001100 (1) 1101001110" source="22194" target="22134" cy:directed="1"/>
      <edge id="25316" label="1101001100 (1) 1101001000" source="22194" target="22447" cy:directed="1"/>
      <edge id="25315" label="1101001100 (1) 1101000100" source="22194" target="22391" cy:directed="1"/>
      <edge id="25314" label="1101001100 (1) 1101101100" source="22194" target="22133" cy:directed="1"/>
      <edge id="25313" label="1001111100 (1) 1001011100" source="22193" target="22307" cy:directed="1"/>
      <edge id="25312" label="1001111100 (1) 1011111100" source="22193" target="22162" cy:directed="1"/>
      <edge id="25311" label="0100001100 (1) 0100001110" source="22192" target="22191" cy:directed="1"/>
      <edge id="25310" label="0100001100 (1) 0100001000" source="22192" target="22446" cy:directed="1"/>
      <edge id="25309" label="0100001100 (1) 0100000100" source="22192" target="22386" cy:directed="1"/>
      <edge id="25308" label="0100001100 (1) 0101001100" source="22192" target="22190" cy:directed="1"/>
      <edge id="25307" label="0100001100 (1) 0000001100" source="22192" target="22207" cy:directed="1"/>
      <edge id="25306" label="0100001110 (1) 0100001010" source="22191" target="22445" cy:directed="1"/>
      <edge id="25305" label="0100001110 (1) 0100000110" source="22191" target="22385" cy:directed="1"/>
      <edge id="25304" label="0100001110 (1) 0101001110" source="22191" target="22132" cy:directed="1"/>
      <edge id="25303" label="0100001110 (1) 0000001110" source="22191" target="22206" cy:directed="1"/>
      <edge id="25302" label="0101001100 (1) 0101001110" source="22190" target="22132" cy:directed="1"/>
      <edge id="25301" label="0101001100 (1) 0101001000" source="22190" target="22444" cy:directed="1"/>
      <edge id="25300" label="0101001100 (1) 0101000100" source="22190" target="22383" cy:directed="1"/>
      <edge id="25299" label="0101001100 (1) 0101101100" source="22190" target="22131" cy:directed="1"/>
      <edge id="25298" label="0101001100 (1) 0001001100" source="22190" target="22205" cy:directed="1"/>
      <edge id="25297" label="0001111100 (1) 0001011100" source="22189" target="22305" cy:directed="1"/>
      <edge id="25296" label="0001111100 (1) 0011111100" source="22189" target="22158" cy:directed="1"/>
      <edge id="25295" label="1110000011 (1) 1110000111" source="22188" target="21827" cy:directed="1"/>
      <edge id="25294" label="1110000011 (1) 1100000011" source="22188" target="22228" cy:directed="1"/>
      <edge id="25293" label="1110000101 (1) 1110000111" source="22187" target="21827" cy:directed="1"/>
      <edge id="25292" label="1110000101 (1) 1110100101" source="22187" target="22083" cy:directed="1"/>
      <edge id="25291" label="1110000101 (1) 1100000101" source="22187" target="22227" cy:directed="1"/>
      <edge id="25290" label="0110000001 (1) 0110000011" source="22186" target="22185" cy:directed="1"/>
      <edge id="25289" label="0110000001 (1) 0110000101" source="22186" target="22184" cy:directed="1"/>
      <edge id="25288" label="0110000001 (1) 0100000001" source="22186" target="22225" cy:directed="1"/>
      <edge id="25287" label="0110000001 (1) 0010000001" source="22186" target="22198" cy:directed="1"/>
      <edge id="25286" label="0110000011 (1) 0110000111" source="22185" target="21824" cy:directed="1"/>
      <edge id="25285" label="0110000011 (1) 0100000011" source="22185" target="22224" cy:directed="1"/>
      <edge id="25284" label="0110000011 (1) 0010000011" source="22185" target="22197" cy:directed="1"/>
      <edge id="25283" label="0110000101 (1) 0110000111" source="22184" target="21824" cy:directed="1"/>
      <edge id="25282" label="0110000101 (1) 0110100101" source="22184" target="22081" cy:directed="1"/>
      <edge id="25281" label="0110000101 (1) 0100000101" source="22184" target="22223" cy:directed="1"/>
      <edge id="25280" label="0110000101 (1) 0010000101" source="22184" target="22196" cy:directed="1"/>
      <edge id="25279" label="1101111100 (1) 1111111100" source="22183" target="22157" cy:directed="1"/>
      <edge id="25278" label="1101111100 (1) 1001111100" source="22183" target="22193" cy:directed="1"/>
      <edge id="25277" label="0101111100 (1) 0111111100" source="22182" target="22156" cy:directed="1"/>
      <edge id="25276" label="0101111100 (1) 0001111100" source="22182" target="22189" cy:directed="1"/>
      <edge id="25275" label="0011010110 (1) 0011010010" source="22181" target="22439" cy:directed="1"/>
      <edge id="25274" label="0011010110 (1) 0011000110" source="22181" target="22330" cy:directed="1"/>
      <edge id="25273" label="0011010110 (1) 0011110110" source="22181" target="21800" cy:directed="1"/>
      <edge id="25272" label="0011010110 (1) 0010010110" source="22181" target="22263" cy:directed="1"/>
      <edge id="25271" label="1011010110 (1) 1011010010" source="22180" target="22442" cy:directed="1"/>
      <edge id="25270" label="1011010110 (1) 1011000110" source="22180" target="22335" cy:directed="1"/>
      <edge id="25269" label="1011010110 (1) 1011110110" source="22180" target="21801" cy:directed="1"/>
      <edge id="25268" label="1011010110 (1) 1010010110" source="22180" target="22262" cy:directed="1"/>
      <edge id="25267" label="0111010100 (1) 0111010110" source="22179" target="22178" cy:directed="1"/>
      <edge id="25266" label="0111010100 (1) 0111010000" source="22179" target="22437" cy:directed="1"/>
      <edge id="25265" label="0111010100 (1) 0111011100" source="22179" target="22280" cy:directed="1"/>
      <edge id="25264" label="0111010100 (1) 0111000100" source="22179" target="22326" cy:directed="1"/>
      <edge id="25263" label="0111010100 (1) 0111110100" source="22179" target="22260" cy:directed="1"/>
      <edge id="25262" label="0111010100 (1) 0110010100" source="22179" target="22259" cy:directed="1"/>
      <edge id="25261" label="0111010100 (1) 0101010100" source="22179" target="22275" cy:directed="1"/>
      <edge id="25260" label="0111010100 (1) 0011010100" source="22179" target="22220" cy:directed="1"/>
      <edge id="25259" label="0111010110 (1) 0111010010" source="22178" target="22436" cy:directed="1"/>
      <edge id="25258" label="0111010110 (1) 0111000110" source="22178" target="22325" cy:directed="1"/>
      <edge id="25257" label="0111010110 (1) 0111110110" source="22178" target="21790" cy:directed="1"/>
      <edge id="25256" label="0111010110 (1) 0110010110" source="22178" target="22258" cy:directed="1"/>
      <edge id="25255" label="0111010110 (1) 0101010110" source="22178" target="22215" cy:directed="1"/>
      <edge id="25254" label="0111010110 (1) 0011010110" source="22178" target="22181" cy:directed="1"/>
      <edge id="25253" label="1111010100 (1) 1111010110" source="22177" target="22176" cy:directed="1"/>
      <edge id="25252" label="1111010100 (1) 1111010000" source="22177" target="22434" cy:directed="1"/>
      <edge id="25251" label="1111010100 (1) 1111011100" source="22177" target="22278" cy:directed="1"/>
      <edge id="25250" label="1111010100 (1) 1111000100" source="22177" target="22333" cy:directed="1"/>
      <edge id="25249" label="1111010100 (1) 1111110100" source="22177" target="22261" cy:directed="1"/>
      <edge id="25248" label="1111010100 (1) 1110010100" source="22177" target="22257" cy:directed="1"/>
      <edge id="25247" label="1111010100 (1) 1101010100" source="22177" target="22272" cy:directed="1"/>
      <edge id="25246" label="1111010100 (1) 1011010100" source="22177" target="22218" cy:directed="1"/>
      <edge id="25245" label="1111010110 (1) 1111010010" source="22176" target="22433" cy:directed="1"/>
      <edge id="25244" label="1111010110 (1) 1111000110" source="22176" target="22328" cy:directed="1"/>
      <edge id="25243" label="1111010110 (1) 1111110110" source="22176" target="21791" cy:directed="1"/>
      <edge id="25242" label="1111010110 (1) 1110010110" source="22176" target="22256" cy:directed="1"/>
      <edge id="25241" label="1111010110 (1) 1101010110" source="22176" target="22214" cy:directed="1"/>
      <edge id="25240" label="1111010110 (1) 1011010110" source="22176" target="22180" cy:directed="1"/>
      <edge id="25239" label="1010001110 (1) 1010001010" source="22175" target="22430" cy:directed="1"/>
      <edge id="25238" label="1010001110 (1) 1010000110" source="22175" target="22370" cy:directed="1"/>
      <edge id="25237" label="1010001110 (1) 1110001110" source="22175" target="22168" cy:directed="1"/>
      <edge id="25236" label="1110001100 (1) 1110001110" source="22174" target="22168" cy:directed="1"/>
      <edge id="25235" label="1110001100 (1) 1110001000" source="22174" target="22429" cy:directed="1"/>
      <edge id="25234" label="1110001100 (1) 1110000100" source="22174" target="22368" cy:directed="1"/>
      <edge id="25233" label="1110001100 (1) 1100001100" source="22174" target="22208" cy:directed="1"/>
      <edge id="25232" label="1001110010 (1) 1001110000" source="22173" target="22501" cy:directed="1"/>
      <edge id="25231" label="1001110010 (1) 1001010010" source="22173" target="22463" cy:directed="1"/>
      <edge id="25230" label="1001110010 (1) 1011110010" source="22173" target="22149" cy:directed="1"/>
      <edge id="25229" label="1011100010 (1) 1011100000" source="22172" target="22500" cy:directed="1"/>
      <edge id="25228" label="1011100010 (1) 1011110010" source="22172" target="22149" cy:directed="1"/>
      <edge id="25227" label="1011100010 (1) 1011000010" source="22172" target="22528" cy:directed="1"/>
      <edge id="25226" label="1011100010 (1) 1010100010" source="22172" target="22252" cy:directed="1"/>
      <edge id="25225" label="1011100010 (1) 1111100010" source="22172" target="22268" cy:directed="1"/>
      <edge id="25224" label="0010001110 (1) 0010001010" source="22171" target="22427" cy:directed="1"/>
      <edge id="25223" label="0010001110 (1) 0010000110" source="22171" target="22367" cy:directed="1"/>
      <edge id="25222" label="0001110010 (1) 0001110000" source="22170" target="22495" cy:directed="1"/>
      <edge id="25221" label="0001110010 (1) 0001010010" source="22170" target="22461" cy:directed="1"/>
      <edge id="25220" label="0001110010 (1) 0011110010" source="22170" target="22148" cy:directed="1"/>
      <edge id="25219" label="0011100010 (1) 0011100000" source="22169" target="22494" cy:directed="1"/>
      <edge id="25218" label="0011100010 (1) 0011110010" source="22169" target="22148" cy:directed="1"/>
      <edge id="25217" label="0011100010 (1) 0011000010" source="22169" target="22525" cy:directed="1"/>
      <edge id="25216" label="0011100010 (1) 0010100010" source="22169" target="22247" cy:directed="1"/>
      <edge id="25215" label="1110001110 (1) 1110001010" source="22168" target="22426" cy:directed="1"/>
      <edge id="25214" label="1110001110 (1) 1110000110" source="22168" target="22362" cy:directed="1"/>
      <edge id="25213" label="1110001110 (1) 1100001110" source="22168" target="22195" cy:directed="1"/>
      <edge id="25212" label="1101110010 (1) 1101110000" source="22167" target="22489" cy:directed="1"/>
      <edge id="25211" label="1101110010 (1) 1111110010" source="22167" target="22144" cy:directed="1"/>
      <edge id="25210" label="1101110010 (1) 1001110010" source="22167" target="22173" cy:directed="1"/>
      <edge id="25209" label="0001000011 (1) 0001000111" source="22166" target="21808" cy:directed="1"/>
      <edge id="25208" label="0001000101 (1) 0001000111" source="22165" target="21808" cy:directed="1"/>
      <edge id="25207" label="0001000101 (1) 0001100101" source="22165" target="22069" cy:directed="1"/>
      <edge id="25206" label="0001000101 (1) 0011000101" source="22165" target="22145" cy:directed="1"/>
      <edge id="25205" label="1001000011 (1) 1001000111" source="22164" target="21810" cy:directed="1"/>
      <edge id="25204" label="1001000011 (1) 1101000011" source="22164" target="22155" cy:directed="1"/>
      <edge id="25203" label="1001000101 (1) 1001000111" source="22163" target="21810" cy:directed="1"/>
      <edge id="25202" label="1001000101 (1) 1001100101" source="22163" target="22066" cy:directed="1"/>
      <edge id="25201" label="1001000101 (1) 1011000101" source="22163" target="22136" cy:directed="1"/>
      <edge id="25200" label="1001000101 (1) 1101000101" source="22163" target="22154" cy:directed="1"/>
      <edge id="25199" label="1011111100 (1) 1011011100" source="22162" target="22296" cy:directed="1"/>
      <edge id="25198" label="1011111100 (1) 1010111100" source="22162" target="22246" cy:directed="1"/>
      <edge id="25197" label="0101110010 (1) 0101110000" source="22161" target="22484" cy:directed="1"/>
      <edge id="25196" label="0101110010 (1) 0111110010" source="22161" target="22139" cy:directed="1"/>
      <edge id="25195" label="0101110010 (1) 0001110010" source="22161" target="22170" cy:directed="1"/>
      <edge id="25194" label="0110001100 (1) 0110001110" source="22160" target="22159" cy:directed="1"/>
      <edge id="25193" label="0110001100 (1) 0110001000" source="22160" target="22423" cy:directed="1"/>
      <edge id="25192" label="0110001100 (1) 0110000100" source="22160" target="22358" cy:directed="1"/>
      <edge id="25191" label="0110001100 (1) 0100001100" source="22160" target="22192" cy:directed="1"/>
      <edge id="25190" label="0110001100 (1) 0010001100" source="22160" target="22204" cy:directed="1"/>
      <edge id="25189" label="0110001110 (1) 0110001010" source="22159" target="22422" cy:directed="1"/>
      <edge id="25188" label="0110001110 (1) 0110000110" source="22159" target="22357" cy:directed="1"/>
      <edge id="25187" label="0110001110 (1) 0100001110" source="22159" target="22191" cy:directed="1"/>
      <edge id="25186" label="0110001110 (1) 0010001110" source="22159" target="22171" cy:directed="1"/>
      <edge id="25185" label="0011111100 (1) 0011011100" source="22158" target="22292" cy:directed="1"/>
      <edge id="25184" label="0011111100 (1) 0010111100" source="22158" target="22243" cy:directed="1"/>
      <edge id="25183" label="1111111100 (1) 1110111100" source="22157" target="22230" cy:directed="1"/>
      <edge id="25182" label="1111111100 (1) 1011111100" source="22157" target="22162" cy:directed="1"/>
      <edge id="25181" label="0111111100 (1) 0110111100" source="22156" target="22229" cy:directed="1"/>
      <edge id="25180" label="0111111100 (1) 0011111100" source="22156" target="22158" cy:directed="1"/>
      <edge id="25179" label="1101000011 (1) 1101000111" source="22155" target="21807" cy:directed="1"/>
      <edge id="25178" label="1101000011 (1) 1101100011" source="22155" target="21746" cy:directed="1"/>
      <edge id="25177" label="1101000101 (1) 1101000111" source="22154" target="21807" cy:directed="1"/>
      <edge id="25176" label="1101000101 (1) 1101100101" source="22154" target="22063" cy:directed="1"/>
      <edge id="25175" label="1101100001 (1) 1101100101" source="22153" target="22063" cy:directed="1"/>
      <edge id="25174" label="1101100001 (1) 1101110001" source="22153" target="22062" cy:directed="1"/>
      <edge id="25173" label="1101100001 (1) 1111100001" source="22153" target="22128" cy:directed="1"/>
      <edge id="25172" label="0101000011 (1) 0101000111" source="22152" target="21806" cy:directed="1"/>
      <edge id="25171" label="0101000011 (1) 0101100011" source="22152" target="21745" cy:directed="1"/>
      <edge id="25170" label="0101000011 (1) 0001000011" source="22152" target="22166" cy:directed="1"/>
      <edge id="25169" label="0101000101 (1) 0101000111" source="22151" target="21806" cy:directed="1"/>
      <edge id="25168" label="0101000101 (1) 0101100101" source="22151" target="22056" cy:directed="1"/>
      <edge id="25167" label="0101000101 (1) 0001000101" source="22151" target="22165" cy:directed="1"/>
      <edge id="25166" label="0101100001 (1) 0101100101" source="22150" target="22056" cy:directed="1"/>
      <edge id="25165" label="0101100001 (1) 0101110001" source="22150" target="22055" cy:directed="1"/>
      <edge id="25164" label="0101100001 (1) 0111100001" source="22150" target="22124" cy:directed="1"/>
      <edge id="25163" label="0101100001 (1) 0001100001" source="22150" target="22120" cy:directed="1"/>
      <edge id="25162" label="1011110010 (1) 1011110000" source="22149" target="22479" cy:directed="1"/>
      <edge id="25161" label="1011110010 (1) 1011010010" source="22149" target="22442" cy:directed="1"/>
      <edge id="25160" label="1011110010 (1) 1010110010" source="22149" target="22217" cy:directed="1"/>
      <edge id="25159" label="0011110010 (1) 0011110000" source="22148" target="22475" cy:directed="1"/>
      <edge id="25158" label="0011110010 (1) 0011010010" source="22148" target="22439" cy:directed="1"/>
      <edge id="25157" label="0011110010 (1) 0010110010" source="22148" target="22216" cy:directed="1"/>
      <edge id="25156" label="0011000001 (1) 0011000011" source="22147" target="22146" cy:directed="1"/>
      <edge id="25155" label="0011000001 (1) 0011000101" source="22147" target="22145" cy:directed="1"/>
      <edge id="25154" label="0011000001 (1) 0010000001" source="22147" target="22198" cy:directed="1"/>
      <edge id="25153" label="0011000001 (1) 0001000001" source="22147" target="22236" cy:directed="1"/>
      <edge id="25152" label="0011000011 (1) 0011000111" source="22146" target="21789" cy:directed="1"/>
      <edge id="25151" label="0011000011 (1) 0010000011" source="22146" target="22197" cy:directed="1"/>
      <edge id="25150" label="0011000011 (1) 0001000011" source="22146" target="22166" cy:directed="1"/>
      <edge id="25149" label="0011000101 (1) 0011000111" source="22145" target="21789" cy:directed="1"/>
      <edge id="25148" label="0011000101 (1) 0011100101" source="22145" target="22033" cy:directed="1"/>
      <edge id="25147" label="0011000101 (1) 0010000101" source="22145" target="22196" cy:directed="1"/>
      <edge id="25146" label="1111110010 (1) 1111110000" source="22144" target="22471" cy:directed="1"/>
      <edge id="25145" label="1111110010 (1) 1110110010" source="22144" target="22213" cy:directed="1"/>
      <edge id="25144" label="1111110010 (1) 1011110010" source="22144" target="22149" cy:directed="1"/>
      <edge id="25143" label="1001001110 (1) 1001001010" source="22143" target="22418" cy:directed="1"/>
      <edge id="25142" label="1001001110 (1) 1001000110" source="22143" target="22353" cy:directed="1"/>
      <edge id="25141" label="1001001110 (1) 1011001110" source="22143" target="22112" cy:directed="1"/>
      <edge id="25140" label="1001001110 (1) 1101001110" source="22143" target="22134" cy:directed="1"/>
      <edge id="25139" label="1011001100 (1) 1011001110" source="22142" target="22112" cy:directed="1"/>
      <edge id="25138" label="1011001100 (1) 1011001000" source="22142" target="22409" cy:directed="1"/>
      <edge id="25137" label="1011001100 (1) 1011000100" source="22142" target="22351" cy:directed="1"/>
      <edge id="25136" label="1011001100 (1) 1010001100" source="22142" target="22209" cy:directed="1"/>
      <edge id="25135" label="1011001100 (1) 1111001100" source="22142" target="22111" cy:directed="1"/>
      <edge id="25134" label="0001001110 (1) 0001001010" source="22141" target="22416" cy:directed="1"/>
      <edge id="25133" label="0001001110 (1) 0001000110" source="22141" target="22350" cy:directed="1"/>
      <edge id="25132" label="0001001110 (1) 0011001110" source="22141" target="22110" cy:directed="1"/>
      <edge id="25131" label="0011001100 (1) 0011001110" source="22140" target="22110" cy:directed="1"/>
      <edge id="25130" label="0011001100 (1) 0011001000" source="22140" target="22400" cy:directed="1"/>
      <edge id="25129" label="0011001100 (1) 0011000100" source="22140" target="22348" cy:directed="1"/>
      <edge id="25128" label="0011001100 (1) 0010001100" source="22140" target="22204" cy:directed="1"/>
      <edge id="25127" label="0111110010 (1) 0111110000" source="22139" target="22467" cy:directed="1"/>
      <edge id="25126" label="0111110010 (1) 0110110010" source="22139" target="22203" cy:directed="1"/>
      <edge id="25125" label="0111110010 (1) 0011110010" source="22139" target="22148" cy:directed="1"/>
      <edge id="25124" label="1011000001 (1) 1011000011" source="22138" target="22137" cy:directed="1"/>
      <edge id="25123" label="1011000001 (1) 1011000101" source="22138" target="22136" cy:directed="1"/>
      <edge id="25122" label="1011000001 (1) 1010000001" source="22138" target="22202" cy:directed="1"/>
      <edge id="25121" label="1011000001 (1) 1001000001" source="22138" target="22232" cy:directed="1"/>
      <edge id="25120" label="1011000001 (1) 1111000001" source="22138" target="22135" cy:directed="1"/>
      <edge id="25119" label="1011000011 (1) 1011000111" source="22137" target="21788" cy:directed="1"/>
      <edge id="25118" label="1011000011 (1) 1010000011" source="22137" target="22201" cy:directed="1"/>
      <edge id="25117" label="1011000011 (1) 1001000011" source="22137" target="22164" cy:directed="1"/>
      <edge id="25116" label="1011000011 (1) 1111000011" source="22137" target="22130" cy:directed="1"/>
      <edge id="25115" label="1011000101 (1) 1011000111" source="22136" target="21788" cy:directed="1"/>
      <edge id="25114" label="1011000101 (1) 1011100101" source="22136" target="22035" cy:directed="1"/>
      <edge id="25113" label="1011000101 (1) 1010000101" source="22136" target="22200" cy:directed="1"/>
      <edge id="25112" label="1011000101 (1) 1111000101" source="22136" target="22129" cy:directed="1"/>
      <edge id="25111" label="1111000001 (1) 1111000011" source="22135" target="22130" cy:directed="1"/>
      <edge id="25110" label="1111000001 (1) 1111000101" source="22135" target="22129" cy:directed="1"/>
      <edge id="25109" label="1111000001 (1) 1111100001" source="22135" target="22128" cy:directed="1"/>
      <edge id="25108" label="1111000001 (1) 1110000001" source="22135" target="22199" cy:directed="1"/>
      <edge id="25107" label="1111000001 (1) 1101000001" source="22135" target="22226" cy:directed="1"/>
      <edge id="25106" label="1101001110 (1) 1101001010" source="22134" target="22414" cy:directed="1"/>
      <edge id="25105" label="1101001110 (1) 1101000110" source="22134" target="22347" cy:directed="1"/>
      <edge id="25104" label="1101001110 (1) 1101101110" source="22134" target="21731" cy:directed="1"/>
      <edge id="25103" label="1101101100 (1) 1101101000" source="22133" target="22413" cy:directed="1"/>
      <edge id="25102" label="1101101100 (1) 1101100100" source="22133" target="22346" cy:directed="1"/>
      <edge id="25101" label="1101101100 (1) 1101111100" source="22133" target="22183" cy:directed="1"/>
      <edge id="25100" label="1101101100 (1) 1111101100" source="22133" target="22101" cy:directed="1"/>
      <edge id="25099" label="0101001110 (1) 0101001010" source="22132" target="22411" cy:directed="1"/>
      <edge id="25098" label="0101001110 (1) 0101000110" source="22132" target="22345" cy:directed="1"/>
      <edge id="25097" label="0101001110 (1) 0101101110" source="22132" target="21730" cy:directed="1"/>
      <edge id="25096" label="0101001110 (1) 0001001110" source="22132" target="22141" cy:directed="1"/>
      <edge id="25095" label="0101101100 (1) 0101101000" source="22131" target="22410" cy:directed="1"/>
      <edge id="25094" label="0101101100 (1) 0101100100" source="22131" target="22344" cy:directed="1"/>
      <edge id="25093" label="0101101100 (1) 0101111100" source="22131" target="22182" cy:directed="1"/>
      <edge id="25092" label="0101101100 (1) 0111101100" source="22131" target="22098" cy:directed="1"/>
      <edge id="25091" label="0101101100 (1) 0001101100" source="22131" target="22096" cy:directed="1"/>
      <edge id="25090" label="1111000011 (1) 1111000111" source="22130" target="21781" cy:directed="1"/>
      <edge id="25089" label="1111000011 (1) 1111100011" source="22130" target="21725" cy:directed="1"/>
      <edge id="25088" label="1111000011 (1) 1110000011" source="22130" target="22188" cy:directed="1"/>
      <edge id="25087" label="1111000011 (1) 1101000011" source="22130" target="22155" cy:directed="1"/>
      <edge id="25086" label="1111000101 (1) 1111000111" source="22129" target="21781" cy:directed="1"/>
      <edge id="25085" label="1111000101 (1) 1111100101" source="22129" target="22025" cy:directed="1"/>
      <edge id="25084" label="1111000101 (1) 1110000101" source="22129" target="22187" cy:directed="1"/>
      <edge id="25083" label="1111000101 (1) 1101000101" source="22129" target="22154" cy:directed="1"/>
      <edge id="25082" label="1111100001 (1) 1111100101" source="22128" target="22025" cy:directed="1"/>
      <edge id="25081" label="1111100001 (1) 1111110001" source="22128" target="22024" cy:directed="1"/>
      <edge id="25080" label="1111100001 (1) 1110100001" source="22128" target="22107" cy:directed="1"/>
      <edge id="25079" label="0111000001 (1) 0111000011" source="22127" target="22126" cy:directed="1"/>
      <edge id="25078" label="0111000001 (1) 0111000101" source="22127" target="22125" cy:directed="1"/>
      <edge id="25077" label="0111000001 (1) 0111100001" source="22127" target="22124" cy:directed="1"/>
      <edge id="25076" label="0111000001 (1) 0110000001" source="22127" target="22186" cy:directed="1"/>
      <edge id="25075" label="0111000001 (1) 0101000001" source="22127" target="22222" cy:directed="1"/>
      <edge id="25074" label="0111000001 (1) 0011000001" source="22127" target="22147" cy:directed="1"/>
      <edge id="25073" label="0111000011 (1) 0111000111" source="22126" target="21780" cy:directed="1"/>
      <edge id="25072" label="0111000011 (1) 0111100011" source="22126" target="21727" cy:directed="1"/>
      <edge id="25071" label="0111000011 (1) 0110000011" source="22126" target="22185" cy:directed="1"/>
      <edge id="25070" label="0111000011 (1) 0101000011" source="22126" target="22152" cy:directed="1"/>
      <edge id="25069" label="0111000011 (1) 0011000011" source="22126" target="22146" cy:directed="1"/>
      <edge id="25068" label="0111000101 (1) 0111000111" source="22125" target="21780" cy:directed="1"/>
      <edge id="25067" label="0111000101 (1) 0111100101" source="22125" target="22019" cy:directed="1"/>
      <edge id="25066" label="0111000101 (1) 0110000101" source="22125" target="22184" cy:directed="1"/>
      <edge id="25065" label="0111000101 (1) 0101000101" source="22125" target="22151" cy:directed="1"/>
      <edge id="25064" label="0111000101 (1) 0011000101" source="22125" target="22145" cy:directed="1"/>
      <edge id="25063" label="0111100001 (1) 0111100101" source="22124" target="22019" cy:directed="1"/>
      <edge id="25062" label="0111100001 (1) 0111110001" source="22124" target="22018" cy:directed="1"/>
      <edge id="25061" label="0111100001 (1) 0110100001" source="22124" target="22103" cy:directed="1"/>
      <edge id="25060" label="0111100001 (1) 0011100001" source="22124" target="22067" cy:directed="1"/>
      <edge id="25059" label="0000100001 (1) 0000100101" source="22123" target="22122" cy:directed="1"/>
      <edge id="25058" label="0000100001 (1) 0000110001" source="22123" target="22121" cy:directed="1"/>
      <edge id="25057" label="0000100001 (1) 0000000001" source="22123" target="22239" cy:directed="1"/>
      <edge id="25056" label="0000100001 (1) 0001100001" source="22123" target="22120" cy:directed="1"/>
      <edge id="25055" label="0000100001 (1) 0010100001" source="22123" target="22119" cy:directed="1"/>
      <edge id="25054" label="0000100101 (1) 0000110101" source="22122" target="21923" cy:directed="1"/>
      <edge id="25053" label="0000100101 (1) 0001100101" source="22122" target="22069" cy:directed="1"/>
      <edge id="25052" label="0000100101 (1) 0010100101" source="22122" target="22090" cy:directed="1"/>
      <edge id="25051" label="0000110001 (1) 0000110101" source="22121" target="21923" cy:directed="1"/>
      <edge id="25050" label="0000110001 (1) 0000111001" source="22121" target="21922" cy:directed="1"/>
      <edge id="25049" label="0000110001 (1) 0000010001" source="22121" target="22074" cy:directed="1"/>
      <edge id="25048" label="0000110001 (1) 0001110001" source="22121" target="22068" cy:directed="1"/>
      <edge id="25047" label="0000110001 (1) 0010110001" source="22121" target="22089" cy:directed="1"/>
      <edge id="25046" label="0001100001 (1) 0001100101" source="22120" target="22069" cy:directed="1"/>
      <edge id="25045" label="0001100001 (1) 0001110001" source="22120" target="22068" cy:directed="1"/>
      <edge id="25044" label="0001100001 (1) 0001000001" source="22120" target="22236" cy:directed="1"/>
      <edge id="25043" label="0001100001 (1) 0011100001" source="22120" target="22067" cy:directed="1"/>
      <edge id="25042" label="0010100001 (1) 0010100101" source="22119" target="22090" cy:directed="1"/>
      <edge id="25041" label="0010100001 (1) 0010110001" source="22119" target="22089" cy:directed="1"/>
      <edge id="25040" label="0010100001 (1) 0010000001" source="22119" target="22198" cy:directed="1"/>
      <edge id="25039" label="1000100001 (1) 1000100101" source="22118" target="22117" cy:directed="1"/>
      <edge id="25038" label="1000100001 (1) 1000110001" source="22118" target="22116" cy:directed="1"/>
      <edge id="25037" label="1000100001 (1) 1000000001" source="22118" target="22235" cy:directed="1"/>
      <edge id="25036" label="1000100001 (1) 1001100001" source="22118" target="22115" cy:directed="1"/>
      <edge id="25035" label="1000100001 (1) 1010100001" source="22118" target="22114" cy:directed="1"/>
      <edge id="25034" label="1000100001 (1) 1100100001" source="22118" target="22113" cy:directed="1"/>
      <edge id="25033" label="1000100101 (1) 1000110101" source="22117" target="21921" cy:directed="1"/>
      <edge id="25032" label="1000100101 (1) 1001100101" source="22117" target="22066" cy:directed="1"/>
      <edge id="25031" label="1000100101 (1) 1010100101" source="22117" target="22088" cy:directed="1"/>
      <edge id="25030" label="1000100101 (1) 1100100101" source="22117" target="22109" cy:directed="1"/>
      <edge id="25029" label="1000110001 (1) 1000110101" source="22116" target="21921" cy:directed="1"/>
      <edge id="25028" label="1000110001 (1) 1000111001" source="22116" target="21920" cy:directed="1"/>
      <edge id="25027" label="1000110001 (1) 1000010001" source="22116" target="22079" cy:directed="1"/>
      <edge id="25026" label="1000110001 (1) 1001110001" source="22116" target="22065" cy:directed="1"/>
      <edge id="25025" label="1000110001 (1) 1010110001" source="22116" target="22087" cy:directed="1"/>
      <edge id="25024" label="1001100001 (1) 1001100101" source="22115" target="22066" cy:directed="1"/>
      <edge id="25023" label="1001100001 (1) 1001110001" source="22115" target="22065" cy:directed="1"/>
      <edge id="25022" label="1001100001 (1) 1001000001" source="22115" target="22232" cy:directed="1"/>
      <edge id="25021" label="1001100001 (1) 1011100001" source="22115" target="22064" cy:directed="1"/>
      <edge id="25020" label="1001100001 (1) 1101100001" source="22115" target="22153" cy:directed="1"/>
      <edge id="25019" label="1010100001 (1) 1010100101" source="22114" target="22088" cy:directed="1"/>
      <edge id="25018" label="1010100001 (1) 1010110001" source="22114" target="22087" cy:directed="1"/>
      <edge id="25017" label="1010100001 (1) 1010000001" source="22114" target="22202" cy:directed="1"/>
      <edge id="25016" label="1010100001 (1) 1110100001" source="22114" target="22107" cy:directed="1"/>
      <edge id="25015" label="1100100001 (1) 1100100101" source="22113" target="22109" cy:directed="1"/>
      <edge id="25014" label="1100100001 (1) 1100110001" source="22113" target="22108" cy:directed="1"/>
      <edge id="25013" label="1100100001 (1) 1100000001" source="22113" target="22231" cy:directed="1"/>
      <edge id="25012" label="1100100001 (1) 1101100001" source="22113" target="22153" cy:directed="1"/>
      <edge id="25011" label="1100100001 (1) 1110100001" source="22113" target="22107" cy:directed="1"/>
      <edge id="25010" label="1011001110 (1) 1011001010" source="22112" target="22408" cy:directed="1"/>
      <edge id="25009" label="1011001110 (1) 1011000110" source="22112" target="22335" cy:directed="1"/>
      <edge id="25008" label="1011001110 (1) 1010001110" source="22112" target="22175" cy:directed="1"/>
      <edge id="25007" label="1011001110 (1) 1111001110" source="22112" target="22102" cy:directed="1"/>
      <edge id="25006" label="1111001100 (1) 1111001110" source="22111" target="22102" cy:directed="1"/>
      <edge id="25005" label="1111001100 (1) 1111001000" source="22111" target="22407" cy:directed="1"/>
      <edge id="25004" label="1111001100 (1) 1111000100" source="22111" target="22333" cy:directed="1"/>
      <edge id="25003" label="1111001100 (1) 1111101100" source="22111" target="22101" cy:directed="1"/>
      <edge id="25002" label="1111001100 (1) 1110001100" source="22111" target="22174" cy:directed="1"/>
      <edge id="25001" label="1111001100 (1) 1101001100" source="22111" target="22194" cy:directed="1"/>
      <edge id="25000" label="0011001110 (1) 0011001010" source="22110" target="22399" cy:directed="1"/>
      <edge id="24999" label="0011001110 (1) 0011000110" source="22110" target="22330" cy:directed="1"/>
      <edge id="24998" label="0011001110 (1) 0010001110" source="22110" target="22171" cy:directed="1"/>
      <edge id="24997" label="1100100101 (1) 1100110101" source="22109" target="21915" cy:directed="1"/>
      <edge id="24996" label="1100100101 (1) 1101100101" source="22109" target="22063" cy:directed="1"/>
      <edge id="24995" label="1100100101 (1) 1110100101" source="22109" target="22083" cy:directed="1"/>
      <edge id="24994" label="1100110001 (1) 1100110101" source="22108" target="21915" cy:directed="1"/>
      <edge id="24993" label="1100110001 (1) 1100111001" source="22108" target="21914" cy:directed="1"/>
      <edge id="24992" label="1100110001 (1) 1100010001" source="22108" target="22061" cy:directed="1"/>
      <edge id="24991" label="1100110001 (1) 1101110001" source="22108" target="22062" cy:directed="1"/>
      <edge id="24990" label="1100110001 (1) 1110110001" source="22108" target="22082" cy:directed="1"/>
      <edge id="24989" label="1100110001 (1) 1000110001" source="22108" target="22116" cy:directed="1"/>
      <edge id="24988" label="1110100001 (1) 1110100101" source="22107" target="22083" cy:directed="1"/>
      <edge id="24987" label="1110100001 (1) 1110110001" source="22107" target="22082" cy:directed="1"/>
      <edge id="24986" label="1110100001 (1) 1110000001" source="22107" target="22199" cy:directed="1"/>
      <edge id="24985" label="0100100001 (1) 0100100101" source="22106" target="22105" cy:directed="1"/>
      <edge id="24984" label="0100100001 (1) 0100110001" source="22106" target="22104" cy:directed="1"/>
      <edge id="24983" label="0100100001 (1) 0100000001" source="22106" target="22225" cy:directed="1"/>
      <edge id="24982" label="0100100001 (1) 0101100001" source="22106" target="22150" cy:directed="1"/>
      <edge id="24981" label="0100100001 (1) 0110100001" source="22106" target="22103" cy:directed="1"/>
      <edge id="24980" label="0100100001 (1) 0000100001" source="22106" target="22123" cy:directed="1"/>
      <edge id="24979" label="0100100101 (1) 0100110101" source="22105" target="21913" cy:directed="1"/>
      <edge id="24978" label="0100100101 (1) 0101100101" source="22105" target="22056" cy:directed="1"/>
      <edge id="24977" label="0100100101 (1) 0110100101" source="22105" target="22081" cy:directed="1"/>
      <edge id="24976" label="0100100101 (1) 0000100101" source="22105" target="22122" cy:directed="1"/>
      <edge id="24975" label="0100110001 (1) 0100110101" source="22104" target="21913" cy:directed="1"/>
      <edge id="24974" label="0100110001 (1) 0100111001" source="22104" target="21912" cy:directed="1"/>
      <edge id="24973" label="0100110001 (1) 0100010001" source="22104" target="22054" cy:directed="1"/>
      <edge id="24972" label="0100110001 (1) 0101110001" source="22104" target="22055" cy:directed="1"/>
      <edge id="24971" label="0100110001 (1) 0110110001" source="22104" target="22080" cy:directed="1"/>
      <edge id="24970" label="0100110001 (1) 0000110001" source="22104" target="22121" cy:directed="1"/>
      <edge id="24969" label="0110100001 (1) 0110100101" source="22103" target="22081" cy:directed="1"/>
      <edge id="24968" label="0110100001 (1) 0110110001" source="22103" target="22080" cy:directed="1"/>
      <edge id="24967" label="0110100001 (1) 0110000001" source="22103" target="22186" cy:directed="1"/>
      <edge id="24966" label="0110100001 (1) 0010100001" source="22103" target="22119" cy:directed="1"/>
      <edge id="24965" label="1111001110 (1) 1111001010" source="22102" target="22389" cy:directed="1"/>
      <edge id="24964" label="1111001110 (1) 1111000110" source="22102" target="22328" cy:directed="1"/>
      <edge id="24963" label="1111001110 (1) 1111101110" source="22102" target="21701" cy:directed="1"/>
      <edge id="24962" label="1111001110 (1) 1110001110" source="22102" target="22168" cy:directed="1"/>
      <edge id="24961" label="1111001110 (1) 1101001110" source="22102" target="22134" cy:directed="1"/>
      <edge id="24960" label="1111101100 (1) 1111101000" source="22101" target="22388" cy:directed="1"/>
      <edge id="24959" label="1111101100 (1) 1111100100" source="22101" target="22327" cy:directed="1"/>
      <edge id="24958" label="1111101100 (1) 1111111100" source="22101" target="22157" cy:directed="1"/>
      <edge id="24957" label="1111101100 (1) 1110101100" source="22101" target="22086" cy:directed="1"/>
      <edge id="24956" label="0111001100 (1) 0111001110" source="22100" target="22099" cy:directed="1"/>
      <edge id="24955" label="0111001100 (1) 0111001000" source="22100" target="22382" cy:directed="1"/>
      <edge id="24954" label="0111001100 (1) 0111000100" source="22100" target="22326" cy:directed="1"/>
      <edge id="24953" label="0111001100 (1) 0111101100" source="22100" target="22098" cy:directed="1"/>
      <edge id="24952" label="0111001100 (1) 0110001100" source="22100" target="22160" cy:directed="1"/>
      <edge id="24951" label="0111001100 (1) 0101001100" source="22100" target="22190" cy:directed="1"/>
      <edge id="24950" label="0111001100 (1) 0011001100" source="22100" target="22140" cy:directed="1"/>
      <edge id="24949" label="0111001110 (1) 0111001010" source="22099" target="22381" cy:directed="1"/>
      <edge id="24948" label="0111001110 (1) 0111000110" source="22099" target="22325" cy:directed="1"/>
      <edge id="24947" label="0111001110 (1) 0111101110" source="22099" target="21700" cy:directed="1"/>
      <edge id="24946" label="0111001110 (1) 0110001110" source="22099" target="22159" cy:directed="1"/>
      <edge id="24945" label="0111001110 (1) 0101001110" source="22099" target="22132" cy:directed="1"/>
      <edge id="24944" label="0111001110 (1) 0011001110" source="22099" target="22110" cy:directed="1"/>
      <edge id="24943" label="0111101100 (1) 0111101000" source="22098" target="22380" cy:directed="1"/>
      <edge id="24942" label="0111101100 (1) 0111100100" source="22098" target="22324" cy:directed="1"/>
      <edge id="24941" label="0111101100 (1) 0111111100" source="22098" target="22156" cy:directed="1"/>
      <edge id="24940" label="0111101100 (1) 0110101100" source="22098" target="22084" cy:directed="1"/>
      <edge id="24939" label="0111101100 (1) 0011101100" source="22098" target="22045" cy:directed="1"/>
      <edge id="24938" label="0000101100 (1) 0000101000" source="22097" target="22377" cy:directed="1"/>
      <edge id="24937" label="0000101100 (1) 0000100100" source="22097" target="22396" cy:directed="1"/>
      <edge id="24936" label="0000101100 (1) 0000111100" source="22097" target="22270" cy:directed="1"/>
      <edge id="24935" label="0000101100 (1) 0000001100" source="22097" target="22207" cy:directed="1"/>
      <edge id="24934" label="0000101100 (1) 0001101100" source="22097" target="22096" cy:directed="1"/>
      <edge id="24933" label="0000101100 (1) 0010101100" source="22097" target="22095" cy:directed="1"/>
      <edge id="24932" label="0001101100 (1) 0001101000" source="22096" target="22376" cy:directed="1"/>
      <edge id="24931" label="0001101100 (1) 0001100100" source="22096" target="22349" cy:directed="1"/>
      <edge id="24930" label="0001101100 (1) 0001111100" source="22096" target="22189" cy:directed="1"/>
      <edge id="24929" label="0001101100 (1) 0001001100" source="22096" target="22205" cy:directed="1"/>
      <edge id="24928" label="0001101100 (1) 0011101100" source="22096" target="22045" cy:directed="1"/>
      <edge id="24927" label="0010101100 (1) 0010101000" source="22095" target="22375" cy:directed="1"/>
      <edge id="24926" label="0010101100 (1) 0010100100" source="22095" target="22366" cy:directed="1"/>
      <edge id="24925" label="0010101100 (1) 0010111100" source="22095" target="22243" cy:directed="1"/>
      <edge id="24924" label="0010101100 (1) 0010001100" source="22095" target="22204" cy:directed="1"/>
      <edge id="24923" label="1000101100 (1) 1000101000" source="22094" target="22374" cy:directed="1"/>
      <edge id="24922" label="1000101100 (1) 1000100100" source="22094" target="22404" cy:directed="1"/>
      <edge id="24921" label="1000101100 (1) 1000111100" source="22094" target="22271" cy:directed="1"/>
      <edge id="24920" label="1000101100 (1) 1000001100" source="22094" target="22212" cy:directed="1"/>
      <edge id="24919" label="1000101100 (1) 1001101100" source="22094" target="22093" cy:directed="1"/>
      <edge id="24918" label="1000101100 (1) 1010101100" source="22094" target="22092" cy:directed="1"/>
      <edge id="24917" label="1000101100 (1) 1100101100" source="22094" target="22091" cy:directed="1"/>
      <edge id="24916" label="1001101100 (1) 1001101000" source="22093" target="22373" cy:directed="1"/>
      <edge id="24915" label="1001101100 (1) 1001100100" source="22093" target="22352" cy:directed="1"/>
      <edge id="24914" label="1001101100 (1) 1001111100" source="22093" target="22193" cy:directed="1"/>
      <edge id="24913" label="1001101100 (1) 1001001100" source="22093" target="22210" cy:directed="1"/>
      <edge id="24912" label="1001101100 (1) 1011101100" source="22093" target="22044" cy:directed="1"/>
      <edge id="24911" label="1001101100 (1) 1101101100" source="22093" target="22133" cy:directed="1"/>
      <edge id="24910" label="1010101100 (1) 1010101000" source="22092" target="22372" cy:directed="1"/>
      <edge id="24909" label="1010101100 (1) 1010100100" source="22092" target="22369" cy:directed="1"/>
      <edge id="24908" label="1010101100 (1) 1010111100" source="22092" target="22246" cy:directed="1"/>
      <edge id="24907" label="1010101100 (1) 1010001100" source="22092" target="22209" cy:directed="1"/>
      <edge id="24906" label="1010101100 (1) 1110101100" source="22092" target="22086" cy:directed="1"/>
      <edge id="24905" label="1100101100 (1) 1100101000" source="22091" target="22371" cy:directed="1"/>
      <edge id="24904" label="1100101100 (1) 1100100100" source="22091" target="22392" cy:directed="1"/>
      <edge id="24903" label="1100101100 (1) 1100111100" source="22091" target="22269" cy:directed="1"/>
      <edge id="24902" label="1100101100 (1) 1100001100" source="22091" target="22208" cy:directed="1"/>
      <edge id="24901" label="1100101100 (1) 1101101100" source="22091" target="22133" cy:directed="1"/>
      <edge id="24900" label="1100101100 (1) 1110101100" source="22091" target="22086" cy:directed="1"/>
      <edge id="24899" label="0010100101 (1) 0010110101" source="22090" target="21895" cy:directed="1"/>
      <edge id="24898" label="0010110001 (1) 0010110101" source="22089" target="21895" cy:directed="1"/>
      <edge id="24897" label="0010110001 (1) 0010111001" source="22089" target="21894" cy:directed="1"/>
      <edge id="24896" label="0010110001 (1) 0010010001" source="22089" target="22039" cy:directed="1"/>
      <edge id="24895" label="1010100101 (1) 1010110101" source="22088" target="21897" cy:directed="1"/>
      <edge id="24894" label="1010100101 (1) 1110100101" source="22088" target="22083" cy:directed="1"/>
      <edge id="24893" label="1010110001 (1) 1010110101" source="22087" target="21897" cy:directed="1"/>
      <edge id="24892" label="1010110001 (1) 1010111001" source="22087" target="21896" cy:directed="1"/>
      <edge id="24891" label="1010110001 (1) 1010010001" source="22087" target="22043" cy:directed="1"/>
      <edge id="24890" label="1110101100 (1) 1110101000" source="22086" target="22365" cy:directed="1"/>
      <edge id="24889" label="1110101100 (1) 1110100100" source="22086" target="22361" cy:directed="1"/>
      <edge id="24888" label="1110101100 (1) 1110111100" source="22086" target="22230" cy:directed="1"/>
      <edge id="24887" label="1110101100 (1) 1110001100" source="22086" target="22174" cy:directed="1"/>
      <edge id="24886" label="0100101100 (1) 0100101000" source="22085" target="22364" cy:directed="1"/>
      <edge id="24885" label="0100101100 (1) 0100100100" source="22085" target="22384" cy:directed="1"/>
      <edge id="24884" label="0100101100 (1) 0100111100" source="22085" target="22266" cy:directed="1"/>
      <edge id="24883" label="0100101100 (1) 0100001100" source="22085" target="22192" cy:directed="1"/>
      <edge id="24882" label="0100101100 (1) 0101101100" source="22085" target="22131" cy:directed="1"/>
      <edge id="24881" label="0100101100 (1) 0110101100" source="22085" target="22084" cy:directed="1"/>
      <edge id="24880" label="0100101100 (1) 0000101100" source="22085" target="22097" cy:directed="1"/>
      <edge id="24879" label="0110101100 (1) 0110101000" source="22084" target="22363" cy:directed="1"/>
      <edge id="24878" label="0110101100 (1) 0110100100" source="22084" target="22356" cy:directed="1"/>
      <edge id="24877" label="0110101100 (1) 0110111100" source="22084" target="22229" cy:directed="1"/>
      <edge id="24876" label="0110101100 (1) 0110001100" source="22084" target="22160" cy:directed="1"/>
      <edge id="24875" label="0110101100 (1) 0010101100" source="22084" target="22095" cy:directed="1"/>
      <edge id="24874" label="1110100101 (1) 1110110101" source="22083" target="21891" cy:directed="1"/>
      <edge id="24873" label="1110110001 (1) 1110110101" source="22082" target="21891" cy:directed="1"/>
      <edge id="24872" label="1110110001 (1) 1110111001" source="22082" target="21890" cy:directed="1"/>
      <edge id="24871" label="1110110001 (1) 1110010001" source="22082" target="22029" cy:directed="1"/>
      <edge id="24870" label="1110110001 (1) 1010110001" source="22082" target="22087" cy:directed="1"/>
      <edge id="24869" label="0110100101 (1) 0110110101" source="22081" target="21886" cy:directed="1"/>
      <edge id="24868" label="0110100101 (1) 0010100101" source="22081" target="22090" cy:directed="1"/>
      <edge id="24867" label="0110110001 (1) 0110110101" source="22080" target="21886" cy:directed="1"/>
      <edge id="24866" label="0110110001 (1) 0110111001" source="22080" target="21885" cy:directed="1"/>
      <edge id="24865" label="0110110001 (1) 0110010001" source="22080" target="22023" cy:directed="1"/>
      <edge id="24864" label="0110110001 (1) 0010110001" source="22080" target="22089" cy:directed="1"/>
      <edge id="24863" label="1000010001 (1) 1000010011" source="22079" target="22078" cy:directed="1"/>
      <edge id="24862" label="1000010001 (1) 1000010101" source="22079" target="22077" cy:directed="1"/>
      <edge id="24861" label="1000010001 (1) 1000011001" source="22079" target="22076" cy:directed="1"/>
      <edge id="24860" label="1000010001 (1) 1000000001" source="22079" target="22235" cy:directed="1"/>
      <edge id="24859" label="1000010001 (1) 1001010001" source="22079" target="22075" cy:directed="1"/>
      <edge id="24858" label="1000010011 (1) 1000010111" source="22078" target="21744" cy:directed="1"/>
      <edge id="24857" label="1000010011 (1) 1000000011" source="22078" target="22234" cy:directed="1"/>
      <edge id="24856" label="1000010011 (1) 1001010011" source="22078" target="22007" cy:directed="1"/>
      <edge id="24855" label="1000010101 (1) 1000010111" source="22077" target="21744" cy:directed="1"/>
      <edge id="24854" label="1000010101 (1) 1000011101" source="22077" target="21796" cy:directed="1"/>
      <edge id="24853" label="1000010101 (1) 1000000101" source="22077" target="22233" cy:directed="1"/>
      <edge id="24852" label="1000010101 (1) 1000110101" source="22077" target="21921" cy:directed="1"/>
      <edge id="24851" label="1000010101 (1) 1001010101" source="22077" target="22006" cy:directed="1"/>
      <edge id="24850" label="1000010101 (1) 1010010101" source="22077" target="22041" cy:directed="1"/>
      <edge id="24849" label="1000011001 (1) 1000011011" source="22076" target="21797" cy:directed="1"/>
      <edge id="24848" label="1000011001 (1) 1000011101" source="22076" target="21796" cy:directed="1"/>
      <edge id="24847" label="1000011001 (1) 1000001001" source="22076" target="21979" cy:directed="1"/>
      <edge id="24846" label="1000011001 (1) 1001011001" source="22076" target="22005" cy:directed="1"/>
      <edge id="24845" label="1001010001 (1) 1001010011" source="22075" target="22007" cy:directed="1"/>
      <edge id="24844" label="1001010001 (1) 1001010101" source="22075" target="22006" cy:directed="1"/>
      <edge id="24843" label="1001010001 (1) 1001011001" source="22075" target="22005" cy:directed="1"/>
      <edge id="24842" label="1001010001 (1) 1001000001" source="22075" target="22232" cy:directed="1"/>
      <edge id="24841" label="0000010001 (1) 0000010011" source="22074" target="22073" cy:directed="1"/>
      <edge id="24840" label="0000010001 (1) 0000010101" source="22074" target="22072" cy:directed="1"/>
      <edge id="24839" label="0000010001 (1) 0000011001" source="22074" target="22071" cy:directed="1"/>
      <edge id="24838" label="0000010001 (1) 0000000001" source="22074" target="22239" cy:directed="1"/>
      <edge id="24837" label="0000010001 (1) 0001010001" source="22074" target="22070" cy:directed="1"/>
      <edge id="24836" label="0000010011 (1) 0000010111" source="22073" target="21747" cy:directed="1"/>
      <edge id="24835" label="0000010011 (1) 0000000011" source="22073" target="22238" cy:directed="1"/>
      <edge id="24834" label="0000010011 (1) 0001010011" source="22073" target="22004" cy:directed="1"/>
      <edge id="24833" label="0000010101 (1) 0000010111" source="22072" target="21747" cy:directed="1"/>
      <edge id="24832" label="0000010101 (1) 0000011101" source="22072" target="21802" cy:directed="1"/>
      <edge id="24831" label="0000010101 (1) 0000000101" source="22072" target="22237" cy:directed="1"/>
      <edge id="24830" label="0000010101 (1) 0000110101" source="22072" target="21923" cy:directed="1"/>
      <edge id="24829" label="0000010101 (1) 0001010101" source="22072" target="22003" cy:directed="1"/>
      <edge id="24828" label="0000010101 (1) 0010010101" source="22072" target="22037" cy:directed="1"/>
      <edge id="24827" label="0000011001 (1) 0000011011" source="22071" target="21803" cy:directed="1"/>
      <edge id="24826" label="0000011001 (1) 0000011101" source="22071" target="21802" cy:directed="1"/>
      <edge id="24825" label="0000011001 (1) 0000001001" source="22071" target="21974" cy:directed="1"/>
      <edge id="24824" label="0000011001 (1) 0001011001" source="22071" target="22002" cy:directed="1"/>
      <edge id="24823" label="0001010001 (1) 0001010011" source="22070" target="22004" cy:directed="1"/>
      <edge id="24822" label="0001010001 (1) 0001010101" source="22070" target="22003" cy:directed="1"/>
      <edge id="24821" label="0001010001 (1) 0001011001" source="22070" target="22002" cy:directed="1"/>
      <edge id="24820" label="0001010001 (1) 0001000001" source="22070" target="22236" cy:directed="1"/>
      <edge id="24819" label="0001100101 (1) 0001110101" source="22069" target="21857" cy:directed="1"/>
      <edge id="24818" label="0001100101 (1) 0011100101" source="22069" target="22033" cy:directed="1"/>
      <edge id="24817" label="0001110001 (1) 0001110101" source="22068" target="21857" cy:directed="1"/>
      <edge id="24816" label="0001110001 (1) 0001111001" source="22068" target="21856" cy:directed="1"/>
      <edge id="24815" label="0001110001 (1) 0001010001" source="22068" target="22070" cy:directed="1"/>
      <edge id="24814" label="0001110001 (1) 0011110001" source="22068" target="22032" cy:directed="1"/>
      <edge id="24813" label="0011100001 (1) 0011100101" source="22067" target="22033" cy:directed="1"/>
      <edge id="24812" label="0011100001 (1) 0011110001" source="22067" target="22032" cy:directed="1"/>
      <edge id="24811" label="0011100001 (1) 0011000001" source="22067" target="22147" cy:directed="1"/>
      <edge id="24810" label="0011100001 (1) 0010100001" source="22067" target="22119" cy:directed="1"/>
      <edge id="24809" label="1001100101 (1) 1001110101" source="22066" target="21860" cy:directed="1"/>
      <edge id="24808" label="1001100101 (1) 1011100101" source="22066" target="22035" cy:directed="1"/>
      <edge id="24807" label="1001100101 (1) 1101100101" source="22066" target="22063" cy:directed="1"/>
      <edge id="24806" label="1001110001 (1) 1001110101" source="22065" target="21860" cy:directed="1"/>
      <edge id="24805" label="1001110001 (1) 1001111001" source="22065" target="21859" cy:directed="1"/>
      <edge id="24804" label="1001110001 (1) 1001010001" source="22065" target="22075" cy:directed="1"/>
      <edge id="24803" label="1001110001 (1) 1011110001" source="22065" target="22034" cy:directed="1"/>
      <edge id="24802" label="1011100001 (1) 1011100101" source="22064" target="22035" cy:directed="1"/>
      <edge id="24801" label="1011100001 (1) 1011110001" source="22064" target="22034" cy:directed="1"/>
      <edge id="24800" label="1011100001 (1) 1011000001" source="22064" target="22138" cy:directed="1"/>
      <edge id="24799" label="1011100001 (1) 1010100001" source="22064" target="22114" cy:directed="1"/>
      <edge id="24798" label="1011100001 (1) 1111100001" source="22064" target="22128" cy:directed="1"/>
      <edge id="24797" label="1101100101 (1) 1101110101" source="22063" target="21851" cy:directed="1"/>
      <edge id="24796" label="1101100101 (1) 1111100101" source="22063" target="22025" cy:directed="1"/>
      <edge id="24795" label="1101110001 (1) 1101110101" source="22062" target="21851" cy:directed="1"/>
      <edge id="24794" label="1101110001 (1) 1101111001" source="22062" target="21850" cy:directed="1"/>
      <edge id="24793" label="1101110001 (1) 1111110001" source="22062" target="22024" cy:directed="1"/>
      <edge id="24792" label="1101110001 (1) 1001110001" source="22062" target="22065" cy:directed="1"/>
      <edge id="24791" label="1100010001 (1) 1100010011" source="22061" target="22060" cy:directed="1"/>
      <edge id="24790" label="1100010001 (1) 1100010101" source="22061" target="22059" cy:directed="1"/>
      <edge id="24789" label="1100010001 (1) 1100011001" source="22061" target="22058" cy:directed="1"/>
      <edge id="24788" label="1100010001 (1) 1100000001" source="22061" target="22231" cy:directed="1"/>
      <edge id="24787" label="1100010001 (1) 1101010001" source="22061" target="22057" cy:directed="1"/>
      <edge id="24786" label="1100010001 (1) 1000010001" source="22061" target="22079" cy:directed="1"/>
      <edge id="24785" label="1100010011 (1) 1100010111" source="22060" target="21739" cy:directed="1"/>
      <edge id="24784" label="1100010011 (1) 1100000011" source="22060" target="22228" cy:directed="1"/>
      <edge id="24783" label="1100010011 (1) 1101010011" source="22060" target="21992" cy:directed="1"/>
      <edge id="24782" label="1100010011 (1) 1000010011" source="22060" target="22078" cy:directed="1"/>
      <edge id="24781" label="1100010101 (1) 1100010111" source="22059" target="21739" cy:directed="1"/>
      <edge id="24780" label="1100010101 (1) 1100011101" source="22059" target="21786" cy:directed="1"/>
      <edge id="24779" label="1100010101 (1) 1100000101" source="22059" target="22227" cy:directed="1"/>
      <edge id="24778" label="1100010101 (1) 1100110101" source="22059" target="21915" cy:directed="1"/>
      <edge id="24777" label="1100010101 (1) 1101010101" source="22059" target="21991" cy:directed="1"/>
      <edge id="24776" label="1100010101 (1) 1000010101" source="22059" target="22077" cy:directed="1"/>
      <edge id="24775" label="1100011001 (1) 1100011011" source="22058" target="21787" cy:directed="1"/>
      <edge id="24774" label="1100011001 (1) 1100011101" source="22058" target="21786" cy:directed="1"/>
      <edge id="24773" label="1100011001 (1) 1100001001" source="22058" target="21975" cy:directed="1"/>
      <edge id="24772" label="1100011001 (1) 1101011001" source="22058" target="21990" cy:directed="1"/>
      <edge id="24771" label="1100011001 (1) 1000011001" source="22058" target="22076" cy:directed="1"/>
      <edge id="24770" label="1101010001 (1) 1101010011" source="22057" target="21992" cy:directed="1"/>
      <edge id="24769" label="1101010001 (1) 1101010101" source="22057" target="21991" cy:directed="1"/>
      <edge id="24768" label="1101010001 (1) 1101011001" source="22057" target="21990" cy:directed="1"/>
      <edge id="24767" label="1101010001 (1) 1101000001" source="22057" target="22226" cy:directed="1"/>
      <edge id="24766" label="1101010001 (1) 1101110001" source="22057" target="22062" cy:directed="1"/>
      <edge id="24765" label="1101010001 (1) 1001010001" source="22057" target="22075" cy:directed="1"/>
      <edge id="24764" label="0101100101 (1) 0101110101" source="22056" target="21849" cy:directed="1"/>
      <edge id="24763" label="0101100101 (1) 0111100101" source="22056" target="22019" cy:directed="1"/>
      <edge id="24762" label="0101100101 (1) 0001100101" source="22056" target="22069" cy:directed="1"/>
      <edge id="24761" label="0101110001 (1) 0101110101" source="22055" target="21849" cy:directed="1"/>
      <edge id="24760" label="0101110001 (1) 0101111001" source="22055" target="21848" cy:directed="1"/>
      <edge id="24759" label="0101110001 (1) 0111110001" source="22055" target="22018" cy:directed="1"/>
      <edge id="24758" label="0101110001 (1) 0001110001" source="22055" target="22068" cy:directed="1"/>
      <edge id="24757" label="0100010001 (1) 0100010011" source="22054" target="22053" cy:directed="1"/>
      <edge id="24756" label="0100010001 (1) 0100010101" source="22054" target="22052" cy:directed="1"/>
      <edge id="24755" label="0100010001 (1) 0100011001" source="22054" target="22051" cy:directed="1"/>
      <edge id="24754" label="0100010001 (1) 0100000001" source="22054" target="22225" cy:directed="1"/>
      <edge id="24753" label="0100010001 (1) 0101010001" source="22054" target="22050" cy:directed="1"/>
      <edge id="24752" label="0100010001 (1) 0000010001" source="22054" target="22074" cy:directed="1"/>
      <edge id="24751" label="0100010011 (1) 0100010111" source="22053" target="21738" cy:directed="1"/>
      <edge id="24750" label="0100010011 (1) 0100000011" source="22053" target="22224" cy:directed="1"/>
      <edge id="24749" label="0100010011 (1) 0101010011" source="22053" target="21989" cy:directed="1"/>
      <edge id="24748" label="0100010011 (1) 0000010011" source="22053" target="22073" cy:directed="1"/>
      <edge id="24747" label="0100010101 (1) 0100010111" source="22052" target="21738" cy:directed="1"/>
      <edge id="24746" label="0100010101 (1) 0100011101" source="22052" target="21782" cy:directed="1"/>
      <edge id="24745" label="0100010101 (1) 0100000101" source="22052" target="22223" cy:directed="1"/>
      <edge id="24744" label="0100010101 (1) 0100110101" source="22052" target="21913" cy:directed="1"/>
      <edge id="24743" label="0100010101 (1) 0101010101" source="22052" target="21988" cy:directed="1"/>
      <edge id="24742" label="0100010101 (1) 0000010101" source="22052" target="22072" cy:directed="1"/>
      <edge id="24741" label="0100011001 (1) 0100011011" source="22051" target="21783" cy:directed="1"/>
      <edge id="24740" label="0100011001 (1) 0100011101" source="22051" target="21782" cy:directed="1"/>
      <edge id="24739" label="0100011001 (1) 0100001001" source="22051" target="21965" cy:directed="1"/>
      <edge id="24738" label="0100011001 (1) 0101011001" source="22051" target="21987" cy:directed="1"/>
      <edge id="24737" label="0100011001 (1) 0000011001" source="22051" target="22071" cy:directed="1"/>
      <edge id="24736" label="0101010001 (1) 0101010011" source="22050" target="21989" cy:directed="1"/>
      <edge id="24735" label="0101010001 (1) 0101010101" source="22050" target="21988" cy:directed="1"/>
      <edge id="24734" label="0101010001 (1) 0101011001" source="22050" target="21987" cy:directed="1"/>
      <edge id="24733" label="0101010001 (1) 0101000001" source="22050" target="22222" cy:directed="1"/>
      <edge id="24732" label="0101010001 (1) 0101110001" source="22050" target="22055" cy:directed="1"/>
      <edge id="24731" label="0101010001 (1) 0001010001" source="22050" target="22070" cy:directed="1"/>
      <edge id="24730" label="1000011110 (1) 1000010110" source="22049" target="22286" cy:directed="1"/>
      <edge id="24729" label="1000011110 (1) 1000001110" source="22049" target="22211" cy:directed="1"/>
      <edge id="24728" label="1000011110 (1) 1001011110" source="22049" target="21961" cy:directed="1"/>
      <edge id="24727" label="1000011110 (1) 1010011110" source="22049" target="22014" cy:directed="1"/>
      <edge id="24726" label="1101101010 (1) 1101101000" source="22048" target="22413" cy:directed="1"/>
      <edge id="24725" label="1101101010 (1) 1101100010" source="22048" target="22299" cy:directed="1"/>
      <edge id="24724" label="1101101010 (1) 1101111010" source="22048" target="21905" cy:directed="1"/>
      <edge id="24723" label="1101101010 (1) 1111101010" source="22048" target="22013" cy:directed="1"/>
      <edge id="24722" label="0101101010 (1) 0101101000" source="22047" target="22410" cy:directed="1"/>
      <edge id="24721" label="0101101010 (1) 0101100010" source="22047" target="22295" cy:directed="1"/>
      <edge id="24720" label="0101101010 (1) 0101111010" source="22047" target="21901" cy:directed="1"/>
      <edge id="24719" label="0101101010 (1) 0111101010" source="22047" target="22010" cy:directed="1"/>
      <edge id="24718" label="0101101010 (1) 0001101010" source="22047" target="21999" cy:directed="1"/>
      <edge id="24717" label="0000011110 (1) 0000010110" source="22046" target="22290" cy:directed="1"/>
      <edge id="24716" label="0000011110 (1) 0000001110" source="22046" target="22206" cy:directed="1"/>
      <edge id="24715" label="0000011110 (1) 0001011110" source="22046" target="21960" cy:directed="1"/>
      <edge id="24714" label="0000011110 (1) 0010011110" source="22046" target="22011" cy:directed="1"/>
      <edge id="24713" label="0011101100 (1) 0011101000" source="22045" target="22339" cy:directed="1"/>
      <edge id="24712" label="0011101100 (1) 0011100100" source="22045" target="22329" cy:directed="1"/>
      <edge id="24711" label="0011101100 (1) 0011111100" source="22045" target="22158" cy:directed="1"/>
      <edge id="24710" label="0011101100 (1) 0011001100" source="22045" target="22140" cy:directed="1"/>
      <edge id="24709" label="0011101100 (1) 0010101100" source="22045" target="22095" cy:directed="1"/>
      <edge id="24708" label="1011101100 (1) 1011101000" source="22044" target="22338" cy:directed="1"/>
      <edge id="24707" label="1011101100 (1) 1011100100" source="22044" target="22334" cy:directed="1"/>
      <edge id="24706" label="1011101100 (1) 1011111100" source="22044" target="22162" cy:directed="1"/>
      <edge id="24705" label="1011101100 (1) 1011001100" source="22044" target="22142" cy:directed="1"/>
      <edge id="24704" label="1011101100 (1) 1010101100" source="22044" target="22092" cy:directed="1"/>
      <edge id="24703" label="1011101100 (1) 1111101100" source="22044" target="22101" cy:directed="1"/>
      <edge id="24702" label="1010010001 (1) 1010010011" source="22043" target="22042" cy:directed="1"/>
      <edge id="24701" label="1010010001 (1) 1010010101" source="22043" target="22041" cy:directed="1"/>
      <edge id="24700" label="1010010001 (1) 1010011001" source="22043" target="22040" cy:directed="1"/>
      <edge id="24699" label="1010010001 (1) 1010000001" source="22043" target="22202" cy:directed="1"/>
      <edge id="24698" label="1010010001 (1) 1000010001" source="22043" target="22079" cy:directed="1"/>
      <edge id="24697" label="1010010011 (1) 1010010111" source="22042" target="21726" cy:directed="1"/>
      <edge id="24696" label="1010010011 (1) 1010000011" source="22042" target="22201" cy:directed="1"/>
      <edge id="24695" label="1010010011 (1) 1000010011" source="22042" target="22078" cy:directed="1"/>
      <edge id="24694" label="1010010101 (1) 1010010111" source="22041" target="21726" cy:directed="1"/>
      <edge id="24693" label="1010010101 (1) 1010011101" source="22041" target="21773" cy:directed="1"/>
      <edge id="24692" label="1010010101 (1) 1010000101" source="22041" target="22200" cy:directed="1"/>
      <edge id="24691" label="1010010101 (1) 1010110101" source="22041" target="21897" cy:directed="1"/>
      <edge id="24690" label="1010011001 (1) 1010011011" source="22040" target="21774" cy:directed="1"/>
      <edge id="24689" label="1010011001 (1) 1010011101" source="22040" target="21773" cy:directed="1"/>
      <edge id="24688" label="1010011001 (1) 1010001001" source="22040" target="21937" cy:directed="1"/>
      <edge id="24687" label="1010011001 (1) 1000011001" source="22040" target="22076" cy:directed="1"/>
      <edge id="24686" label="0010010001 (1) 0010010011" source="22039" target="22038" cy:directed="1"/>
      <edge id="24685" label="0010010001 (1) 0010010101" source="22039" target="22037" cy:directed="1"/>
      <edge id="24684" label="0010010001 (1) 0010011001" source="22039" target="22036" cy:directed="1"/>
      <edge id="24683" label="0010010001 (1) 0010000001" source="22039" target="22198" cy:directed="1"/>
      <edge id="24682" label="0010010001 (1) 0000010001" source="22039" target="22074" cy:directed="1"/>
      <edge id="24681" label="0010010011 (1) 0010010111" source="22038" target="21724" cy:directed="1"/>
      <edge id="24680" label="0010010011 (1) 0010000011" source="22038" target="22197" cy:directed="1"/>
      <edge id="24679" label="0010010011 (1) 0000010011" source="22038" target="22073" cy:directed="1"/>
      <edge id="24678" label="0010010101 (1) 0010010111" source="22037" target="21724" cy:directed="1"/>
      <edge id="24677" label="0010010101 (1) 0010011101" source="22037" target="21771" cy:directed="1"/>
      <edge id="24676" label="0010010101 (1) 0010000101" source="22037" target="22196" cy:directed="1"/>
      <edge id="24675" label="0010010101 (1) 0010110101" source="22037" target="21895" cy:directed="1"/>
      <edge id="24674" label="0010011001 (1) 0010011011" source="22036" target="21772" cy:directed="1"/>
      <edge id="24673" label="0010011001 (1) 0010011101" source="22036" target="21771" cy:directed="1"/>
      <edge id="24672" label="0010011001 (1) 0010001001" source="22036" target="21933" cy:directed="1"/>
      <edge id="24671" label="0010011001 (1) 0000011001" source="22036" target="22071" cy:directed="1"/>
      <edge id="24670" label="1011100101 (1) 1011110101" source="22035" target="21826" cy:directed="1"/>
      <edge id="24669" label="1011100101 (1) 1010100101" source="22035" target="22088" cy:directed="1"/>
      <edge id="24668" label="1011100101 (1) 1111100101" source="22035" target="22025" cy:directed="1"/>
      <edge id="24667" label="1011110001 (1) 1011110101" source="22034" target="21826" cy:directed="1"/>
      <edge id="24666" label="1011110001 (1) 1011111001" source="22034" target="21825" cy:directed="1"/>
      <edge id="24665" label="1011110001 (1) 1011010001" source="22034" target="21959" cy:directed="1"/>
      <edge id="24664" label="1011110001 (1) 1010110001" source="22034" target="22087" cy:directed="1"/>
      <edge id="24663" label="0011100101 (1) 0011110101" source="22033" target="21823" cy:directed="1"/>
      <edge id="24662" label="0011100101 (1) 0010100101" source="22033" target="22090" cy:directed="1"/>
      <edge id="24661" label="0011110001 (1) 0011110101" source="22032" target="21823" cy:directed="1"/>
      <edge id="24660" label="0011110001 (1) 0011111001" source="22032" target="21822" cy:directed="1"/>
      <edge id="24659" label="0011110001 (1) 0011010001" source="22032" target="21955" cy:directed="1"/>
      <edge id="24658" label="0011110001 (1) 0010110001" source="22032" target="22089" cy:directed="1"/>
      <edge id="24657" label="1100011110 (1) 1100010110" source="22031" target="22273" cy:directed="1"/>
      <edge id="24656" label="1100011110 (1) 1100001110" source="22031" target="22195" cy:directed="1"/>
      <edge id="24655" label="1100011110 (1) 1101011110" source="22031" target="21951" cy:directed="1"/>
      <edge id="24654" label="1100011110 (1) 1000011110" source="22031" target="22049" cy:directed="1"/>
      <edge id="24653" label="0100011110 (1) 0100010110" source="22030" target="22276" cy:directed="1"/>
      <edge id="24652" label="0100011110 (1) 0100001110" source="22030" target="22191" cy:directed="1"/>
      <edge id="24651" label="0100011110 (1) 0101011110" source="22030" target="21949" cy:directed="1"/>
      <edge id="24650" label="0100011110 (1) 0000011110" source="22030" target="22046" cy:directed="1"/>
      <edge id="24649" label="1110010001 (1) 1110010011" source="22029" target="22028" cy:directed="1"/>
      <edge id="24648" label="1110010001 (1) 1110010101" source="22029" target="22027" cy:directed="1"/>
      <edge id="24647" label="1110010001 (1) 1110011001" source="22029" target="22026" cy:directed="1"/>
      <edge id="24646" label="1110010001 (1) 1110000001" source="22029" target="22199" cy:directed="1"/>
      <edge id="24645" label="1110010001 (1) 1100010001" source="22029" target="22061" cy:directed="1"/>
      <edge id="24644" label="1110010001 (1) 1010010001" source="22029" target="22043" cy:directed="1"/>
      <edge id="24643" label="1110010011 (1) 1110010111" source="22028" target="21723" cy:directed="1"/>
      <edge id="24642" label="1110010011 (1) 1110000011" source="22028" target="22188" cy:directed="1"/>
      <edge id="24641" label="1110010011 (1) 1100010011" source="22028" target="22060" cy:directed="1"/>
      <edge id="24640" label="1110010011 (1) 1010010011" source="22028" target="22042" cy:directed="1"/>
      <edge id="24639" label="1110010101 (1) 1110010111" source="22027" target="21723" cy:directed="1"/>
      <edge id="24638" label="1110010101 (1) 1110011101" source="22027" target="21768" cy:directed="1"/>
      <edge id="24637" label="1110010101 (1) 1110000101" source="22027" target="22187" cy:directed="1"/>
      <edge id="24636" label="1110010101 (1) 1110110101" source="22027" target="21891" cy:directed="1"/>
      <edge id="24635" label="1110010101 (1) 1100010101" source="22027" target="22059" cy:directed="1"/>
      <edge id="24634" label="1110010101 (1) 1010010101" source="22027" target="22041" cy:directed="1"/>
      <edge id="24633" label="1110011001 (1) 1110011011" source="22026" target="21769" cy:directed="1"/>
      <edge id="24632" label="1110011001 (1) 1110011101" source="22026" target="21768" cy:directed="1"/>
      <edge id="24631" label="1110011001 (1) 1110001001" source="22026" target="21934" cy:directed="1"/>
      <edge id="24630" label="1110011001 (1) 1100011001" source="22026" target="22058" cy:directed="1"/>
      <edge id="24629" label="1110011001 (1) 1010011001" source="22026" target="22040" cy:directed="1"/>
      <edge id="24628" label="1111100101 (1) 1111110101" source="22025" target="21821" cy:directed="1"/>
      <edge id="24627" label="1111100101 (1) 1110100101" source="22025" target="22083" cy:directed="1"/>
      <edge id="24626" label="1111110001 (1) 1111110101" source="22024" target="21821" cy:directed="1"/>
      <edge id="24625" label="1111110001 (1) 1111111001" source="22024" target="21820" cy:directed="1"/>
      <edge id="24624" label="1111110001 (1) 1110110001" source="22024" target="22082" cy:directed="1"/>
      <edge id="24623" label="1111110001 (1) 1011110001" source="22024" target="22034" cy:directed="1"/>
      <edge id="24622" label="0110010001 (1) 0110010011" source="22023" target="22022" cy:directed="1"/>
      <edge id="24621" label="0110010001 (1) 0110010101" source="22023" target="22021" cy:directed="1"/>
      <edge id="24620" label="0110010001 (1) 0110011001" source="22023" target="22020" cy:directed="1"/>
      <edge id="24619" label="0110010001 (1) 0110000001" source="22023" target="22186" cy:directed="1"/>
      <edge id="24618" label="0110010001 (1) 0100010001" source="22023" target="22054" cy:directed="1"/>
      <edge id="24617" label="0110010001 (1) 0010010001" source="22023" target="22039" cy:directed="1"/>
      <edge id="24616" label="0110010011 (1) 0110010111" source="22022" target="21722" cy:directed="1"/>
      <edge id="24615" label="0110010011 (1) 0110000011" source="22022" target="22185" cy:directed="1"/>
      <edge id="24614" label="0110010011 (1) 0100010011" source="22022" target="22053" cy:directed="1"/>
      <edge id="24613" label="0110010011 (1) 0010010011" source="22022" target="22038" cy:directed="1"/>
      <edge id="24612" label="0110010101 (1) 0110010111" source="22021" target="21722" cy:directed="1"/>
      <edge id="24611" label="0110010101 (1) 0110011101" source="22021" target="21765" cy:directed="1"/>
      <edge id="24610" label="0110010101 (1) 0110000101" source="22021" target="22184" cy:directed="1"/>
      <edge id="24609" label="0110010101 (1) 0110110101" source="22021" target="21886" cy:directed="1"/>
      <edge id="24608" label="0110010101 (1) 0100010101" source="22021" target="22052" cy:directed="1"/>
      <edge id="24607" label="0110010101 (1) 0010010101" source="22021" target="22037" cy:directed="1"/>
      <edge id="24606" label="0110011001 (1) 0110011011" source="22020" target="21766" cy:directed="1"/>
      <edge id="24605" label="0110011001 (1) 0110011101" source="22020" target="21765" cy:directed="1"/>
      <edge id="24604" label="0110011001 (1) 0110001001" source="22020" target="21926" cy:directed="1"/>
      <edge id="24603" label="0110011001 (1) 0100011001" source="22020" target="22051" cy:directed="1"/>
      <edge id="24602" label="0110011001 (1) 0010011001" source="22020" target="22036" cy:directed="1"/>
      <edge id="24601" label="0111100101 (1) 0111110101" source="22019" target="21819" cy:directed="1"/>
      <edge id="24600" label="0111100101 (1) 0110100101" source="22019" target="22081" cy:directed="1"/>
      <edge id="24599" label="0111100101 (1) 0011100101" source="22019" target="22033" cy:directed="1"/>
      <edge id="24598" label="0111110001 (1) 0111110101" source="22018" target="21819" cy:directed="1"/>
      <edge id="24597" label="0111110001 (1) 0111111001" source="22018" target="21818" cy:directed="1"/>
      <edge id="24596" label="0111110001 (1) 0110110001" source="22018" target="22080" cy:directed="1"/>
      <edge id="24595" label="0111110001 (1) 0011110001" source="22018" target="22032" cy:directed="1"/>
      <edge id="24594" label="1000100110 (1) 1000100100" source="22017" target="22404" cy:directed="1"/>
      <edge id="24593" label="1000100110 (1) 1000100010" source="22017" target="22255" cy:directed="1"/>
      <edge id="24592" label="1000100110 (1) 1000110110" source="22017" target="21881" cy:directed="1"/>
      <edge id="24591" label="1000100110 (1) 1001100110" source="22017" target="21930" cy:directed="1"/>
      <edge id="24590" label="1000100110 (1) 1010100110" source="22017" target="21986" cy:directed="1"/>
      <edge id="24589" label="1000100110 (1) 1100100110" source="22017" target="22015" cy:directed="1"/>
      <edge id="24588" label="0000100110 (1) 0000100100" source="22016" target="22396" cy:directed="1"/>
      <edge id="24587" label="0000100110 (1) 0000100010" source="22016" target="22250" cy:directed="1"/>
      <edge id="24586" label="0000100110 (1) 0000110110" source="22016" target="21880" cy:directed="1"/>
      <edge id="24585" label="0000100110 (1) 0001100110" source="22016" target="21929" cy:directed="1"/>
      <edge id="24584" label="0000100110 (1) 0010100110" source="22016" target="21985" cy:directed="1"/>
      <edge id="24583" label="1100100110 (1) 1100100100" source="22015" target="22392" cy:directed="1"/>
      <edge id="24582" label="1100100110 (1) 1100100010" source="22015" target="22251" cy:directed="1"/>
      <edge id="24581" label="1100100110 (1) 1100110110" source="22015" target="21877" cy:directed="1"/>
      <edge id="24580" label="1100100110 (1) 1101100110" source="22015" target="21919" cy:directed="1"/>
      <edge id="24579" label="1100100110 (1) 1110100110" source="22015" target="21970" cy:directed="1"/>
      <edge id="24578" label="1010011110 (1) 1010010110" source="22014" target="22262" cy:directed="1"/>
      <edge id="24577" label="1010011110 (1) 1010001110" source="22014" target="22175" cy:directed="1"/>
      <edge id="24576" label="1111101010 (1) 1111101000" source="22013" target="22388" cy:directed="1"/>
      <edge id="24575" label="1111101010 (1) 1111100010" source="22013" target="22268" cy:directed="1"/>
      <edge id="24574" label="1111101010 (1) 1111111010" source="22013" target="21876" cy:directed="1"/>
      <edge id="24573" label="1111101010 (1) 1110101010" source="22013" target="21983" cy:directed="1"/>
      <edge id="24572" label="0100100110 (1) 0100100100" source="22012" target="22384" cy:directed="1"/>
      <edge id="24571" label="0100100110 (1) 0100100010" source="22012" target="22242" cy:directed="1"/>
      <edge id="24570" label="0100100110 (1) 0100110110" source="22012" target="21875" cy:directed="1"/>
      <edge id="24569" label="0100100110 (1) 0101100110" source="22012" target="21917" cy:directed="1"/>
      <edge id="24568" label="0100100110 (1) 0110100110" source="22012" target="21969" cy:directed="1"/>
      <edge id="24567" label="0100100110 (1) 0000100110" source="22012" target="22016" cy:directed="1"/>
      <edge id="24566" label="0010011110 (1) 0010010110" source="22011" target="22263" cy:directed="1"/>
      <edge id="24565" label="0010011110 (1) 0010001110" source="22011" target="22171" cy:directed="1"/>
      <edge id="24564" label="0111101010 (1) 0111101000" source="22010" target="22380" cy:directed="1"/>
      <edge id="24563" label="0111101010 (1) 0111100010" source="22010" target="22264" cy:directed="1"/>
      <edge id="24562" label="0111101010 (1) 0111111010" source="22010" target="21866" cy:directed="1"/>
      <edge id="24561" label="0111101010 (1) 0110101010" source="22010" target="21980" cy:directed="1"/>
      <edge id="24560" label="0111101010 (1) 0011101010" source="22010" target="21908" cy:directed="1"/>
      <edge id="24559" label="1110011110 (1) 1110010110" source="22009" target="22256" cy:directed="1"/>
      <edge id="24558" label="1110011110 (1) 1110001110" source="22009" target="22168" cy:directed="1"/>
      <edge id="24557" label="1110011110 (1) 1100011110" source="22009" target="22031" cy:directed="1"/>
      <edge id="24556" label="1110011110 (1) 1010011110" source="22009" target="22014" cy:directed="1"/>
      <edge id="24555" label="0110011110 (1) 0110010110" source="22008" target="22258" cy:directed="1"/>
      <edge id="24554" label="0110011110 (1) 0110001110" source="22008" target="22159" cy:directed="1"/>
      <edge id="24553" label="0110011110 (1) 0100011110" source="22008" target="22030" cy:directed="1"/>
      <edge id="24552" label="0110011110 (1) 0010011110" source="22008" target="22011" cy:directed="1"/>
      <edge id="24551" label="1001010011 (1) 1001010111" source="22007" target="21697" cy:directed="1"/>
      <edge id="24550" label="1001010011 (1) 1001000011" source="22007" target="22164" cy:directed="1"/>
      <edge id="24549" label="1001010101 (1) 1001010111" source="22006" target="21697" cy:directed="1"/>
      <edge id="24548" label="1001010101 (1) 1001011101" source="22006" target="21758" cy:directed="1"/>
      <edge id="24547" label="1001010101 (1) 1001000101" source="22006" target="22163" cy:directed="1"/>
      <edge id="24546" label="1001010101 (1) 1001110101" source="22006" target="21860" cy:directed="1"/>
      <edge id="24545" label="1001010101 (1) 1011010101" source="22006" target="21957" cy:directed="1"/>
      <edge id="24544" label="1001011001 (1) 1001011011" source="22005" target="21759" cy:directed="1"/>
      <edge id="24543" label="1001011001 (1) 1001011101" source="22005" target="21758" cy:directed="1"/>
      <edge id="24542" label="1001011001 (1) 1001001001" source="22005" target="21976" cy:directed="1"/>
      <edge id="24541" label="0001010011 (1) 0001010111" source="22004" target="21696" cy:directed="1"/>
      <edge id="24540" label="0001010011 (1) 0001000011" source="22004" target="22166" cy:directed="1"/>
      <edge id="24539" label="0001010101 (1) 0001010111" source="22003" target="21696" cy:directed="1"/>
      <edge id="24538" label="0001010101 (1) 0001011101" source="22003" target="21756" cy:directed="1"/>
      <edge id="24537" label="0001010101 (1) 0001000101" source="22003" target="22165" cy:directed="1"/>
      <edge id="24536" label="0001010101 (1) 0001110101" source="22003" target="21857" cy:directed="1"/>
      <edge id="24535" label="0001010101 (1) 0011010101" source="22003" target="21953" cy:directed="1"/>
      <edge id="24534" label="0001011001 (1) 0001011011" source="22002" target="21757" cy:directed="1"/>
      <edge id="24533" label="0001011001 (1) 0001011101" source="22002" target="21756" cy:directed="1"/>
      <edge id="24532" label="0001011001 (1) 0001001001" source="22002" target="21971" cy:directed="1"/>
      <edge id="24531" label="0000101010 (1) 0000101000" source="22001" target="22377" cy:directed="1"/>
      <edge id="24530" label="0000101010 (1) 0000100010" source="22001" target="22250" cy:directed="1"/>
      <edge id="24529" label="0000101010 (1) 0000111010" source="22001" target="22000" cy:directed="1"/>
      <edge id="24528" label="0000101010 (1) 0000001010" source="22001" target="22450" cy:directed="1"/>
      <edge id="24527" label="0000101010 (1) 0001101010" source="22001" target="21999" cy:directed="1"/>
      <edge id="24526" label="0000101010 (1) 0010101010" source="22001" target="21998" cy:directed="1"/>
      <edge id="24525" label="0000111010 (1) 0000111000" source="22000" target="22424" cy:directed="1"/>
      <edge id="24524" label="0000111010 (1) 0000111110" source="22000" target="21805" cy:directed="1"/>
      <edge id="24523" label="0000111010 (1) 0000110010" source="22000" target="22249" cy:directed="1"/>
      <edge id="24522" label="0000111010 (1) 0000011010" source="22000" target="22341" cy:directed="1"/>
      <edge id="24521" label="0000111010 (1) 0001111010" source="22000" target="21909" cy:directed="1"/>
      <edge id="24520" label="0000111010 (1) 0010111010" source="22000" target="21950" cy:directed="1"/>
      <edge id="24519" label="0001101010 (1) 0001101000" source="21999" target="22376" cy:directed="1"/>
      <edge id="24518" label="0001101010 (1) 0001100010" source="21999" target="22248" cy:directed="1"/>
      <edge id="24517" label="0001101010 (1) 0001111010" source="21999" target="21909" cy:directed="1"/>
      <edge id="24516" label="0001101010 (1) 0001001010" source="21999" target="22416" cy:directed="1"/>
      <edge id="24515" label="0001101010 (1) 0011101010" source="21999" target="21908" cy:directed="1"/>
      <edge id="24514" label="0010101010 (1) 0010101000" source="21998" target="22375" cy:directed="1"/>
      <edge id="24513" label="0010101010 (1) 0010100010" source="21998" target="22247" cy:directed="1"/>
      <edge id="24512" label="0010101010 (1) 0010111010" source="21998" target="21950" cy:directed="1"/>
      <edge id="24511" label="0010101010 (1) 0010001010" source="21998" target="22427" cy:directed="1"/>
      <edge id="24510" label="1000101010 (1) 1000101000" source="21997" target="22374" cy:directed="1"/>
      <edge id="24509" label="1000101010 (1) 1000100010" source="21997" target="22255" cy:directed="1"/>
      <edge id="24508" label="1000101010 (1) 1000111010" source="21997" target="21996" cy:directed="1"/>
      <edge id="24507" label="1000101010 (1) 1000001010" source="21997" target="22454" cy:directed="1"/>
      <edge id="24506" label="1000101010 (1) 1001101010" source="21997" target="21995" cy:directed="1"/>
      <edge id="24505" label="1000101010 (1) 1010101010" source="21997" target="21994" cy:directed="1"/>
      <edge id="24504" label="1000101010 (1) 1100101010" source="21997" target="21993" cy:directed="1"/>
      <edge id="24503" label="1000111010 (1) 1000111000" source="21996" target="22425" cy:directed="1"/>
      <edge id="24502" label="1000111010 (1) 1000111110" source="21996" target="21804" cy:directed="1"/>
      <edge id="24501" label="1000111010 (1) 1000110010" source="21996" target="22254" cy:directed="1"/>
      <edge id="24500" label="1000111010 (1) 1000011010" source="21996" target="22343" cy:directed="1"/>
      <edge id="24499" label="1000111010 (1) 1001111010" source="21996" target="21907" cy:directed="1"/>
      <edge id="24498" label="1000111010 (1) 1010111010" source="21996" target="21948" cy:directed="1"/>
      <edge id="24497" label="1001101010 (1) 1001101000" source="21995" target="22373" cy:directed="1"/>
      <edge id="24496" label="1001101010 (1) 1001100010" source="21995" target="22253" cy:directed="1"/>
      <edge id="24495" label="1001101010 (1) 1001111010" source="21995" target="21907" cy:directed="1"/>
      <edge id="24494" label="1001101010 (1) 1001001010" source="21995" target="22418" cy:directed="1"/>
      <edge id="24493" label="1001101010 (1) 1011101010" source="21995" target="21906" cy:directed="1"/>
      <edge id="24492" label="1001101010 (1) 1101101010" source="21995" target="22048" cy:directed="1"/>
      <edge id="24491" label="1010101010 (1) 1010101000" source="21994" target="22372" cy:directed="1"/>
      <edge id="24490" label="1010101010 (1) 1010100010" source="21994" target="22252" cy:directed="1"/>
      <edge id="24489" label="1010101010 (1) 1010111010" source="21994" target="21948" cy:directed="1"/>
      <edge id="24488" label="1010101010 (1) 1010001010" source="21994" target="22430" cy:directed="1"/>
      <edge id="24487" label="1010101010 (1) 1110101010" source="21994" target="21983" cy:directed="1"/>
      <edge id="24486" label="1100101010 (1) 1100101000" source="21993" target="22371" cy:directed="1"/>
      <edge id="24485" label="1100101010 (1) 1100100010" source="21993" target="22251" cy:directed="1"/>
      <edge id="24484" label="1100101010 (1) 1100111010" source="21993" target="21984" cy:directed="1"/>
      <edge id="24483" label="1100101010 (1) 1100001010" source="21993" target="22448" cy:directed="1"/>
      <edge id="24482" label="1100101010 (1) 1101101010" source="21993" target="22048" cy:directed="1"/>
      <edge id="24481" label="1100101010 (1) 1110101010" source="21993" target="21983" cy:directed="1"/>
      <edge id="24480" label="1101010011 (1) 1101010111" source="21992" target="21688" cy:directed="1"/>
      <edge id="24479" label="1101010011 (1) 1101000011" source="21992" target="22155" cy:directed="1"/>
      <edge id="24478" label="1101010011 (1) 1101110011" source="21992" target="21653" cy:directed="1"/>
      <edge id="24477" label="1101010011 (1) 1001010011" source="21992" target="22007" cy:directed="1"/>
      <edge id="24476" label="1101010101 (1) 1101010111" source="21991" target="21688" cy:directed="1"/>
      <edge id="24475" label="1101010101 (1) 1101011101" source="21991" target="21754" cy:directed="1"/>
      <edge id="24474" label="1101010101 (1) 1101000101" source="21991" target="22154" cy:directed="1"/>
      <edge id="24473" label="1101010101 (1) 1101110101" source="21991" target="21851" cy:directed="1"/>
      <edge id="24472" label="1101010101 (1) 1001010101" source="21991" target="22006" cy:directed="1"/>
      <edge id="24471" label="1101011001 (1) 1101011011" source="21990" target="21755" cy:directed="1"/>
      <edge id="24470" label="1101011001 (1) 1101011101" source="21990" target="21754" cy:directed="1"/>
      <edge id="24469" label="1101011001 (1) 1101001001" source="21990" target="21966" cy:directed="1"/>
      <edge id="24468" label="1101011001 (1) 1101111001" source="21990" target="21850" cy:directed="1"/>
      <edge id="24467" label="1101011001 (1) 1001011001" source="21990" target="22005" cy:directed="1"/>
      <edge id="24466" label="0101010011 (1) 0101010111" source="21989" target="21687" cy:directed="1"/>
      <edge id="24465" label="0101010011 (1) 0101000011" source="21989" target="22152" cy:directed="1"/>
      <edge id="24464" label="0101010011 (1) 0101110011" source="21989" target="21649" cy:directed="1"/>
      <edge id="24463" label="0101010011 (1) 0001010011" source="21989" target="22004" cy:directed="1"/>
      <edge id="24462" label="0101010101 (1) 0101010111" source="21988" target="21687" cy:directed="1"/>
      <edge id="24461" label="0101010101 (1) 0101011101" source="21988" target="21752" cy:directed="1"/>
      <edge id="24460" label="0101010101 (1) 0101000101" source="21988" target="22151" cy:directed="1"/>
      <edge id="24459" label="0101010101 (1) 0101110101" source="21988" target="21849" cy:directed="1"/>
      <edge id="24458" label="0101010101 (1) 0001010101" source="21988" target="22003" cy:directed="1"/>
      <edge id="24457" label="0101011001 (1) 0101011011" source="21987" target="21753" cy:directed="1"/>
      <edge id="24456" label="0101011001 (1) 0101011101" source="21987" target="21752" cy:directed="1"/>
      <edge id="24455" label="0101011001 (1) 0101001001" source="21987" target="21962" cy:directed="1"/>
      <edge id="24454" label="0101011001 (1) 0101111001" source="21987" target="21848" cy:directed="1"/>
      <edge id="24453" label="0101011001 (1) 0001011001" source="21987" target="22002" cy:directed="1"/>
      <edge id="24452" label="1010100110 (1) 1010100100" source="21986" target="22369" cy:directed="1"/>
      <edge id="24451" label="1010100110 (1) 1010100010" source="21986" target="22252" cy:directed="1"/>
      <edge id="24450" label="1010100110 (1) 1010110110" source="21986" target="21847" cy:directed="1"/>
      <edge id="24449" label="1010100110 (1) 1110100110" source="21986" target="21970" cy:directed="1"/>
      <edge id="24448" label="0010100110 (1) 0010100100" source="21985" target="22366" cy:directed="1"/>
      <edge id="24447" label="0010100110 (1) 0010100010" source="21985" target="22247" cy:directed="1"/>
      <edge id="24446" label="0010100110 (1) 0010110110" source="21985" target="21846" cy:directed="1"/>
      <edge id="24445" label="1100111010 (1) 1100111000" source="21984" target="22421" cy:directed="1"/>
      <edge id="24444" label="1100111010 (1) 1100111110" source="21984" target="21799" cy:directed="1"/>
      <edge id="24443" label="1100111010 (1) 1100110010" source="21984" target="22245" cy:directed="1"/>
      <edge id="24442" label="1100111010 (1) 1100011010" source="21984" target="22337" cy:directed="1"/>
      <edge id="24441" label="1100111010 (1) 1101111010" source="21984" target="21905" cy:directed="1"/>
      <edge id="24440" label="1100111010 (1) 1110111010" source="21984" target="21939" cy:directed="1"/>
      <edge id="24439" label="1100111010 (1) 1000111010" source="21984" target="21996" cy:directed="1"/>
      <edge id="24438" label="1110101010 (1) 1110101000" source="21983" target="22365" cy:directed="1"/>
      <edge id="24437" label="1110101010 (1) 1110100010" source="21983" target="22244" cy:directed="1"/>
      <edge id="24436" label="1110101010 (1) 1110111010" source="21983" target="21939" cy:directed="1"/>
      <edge id="24435" label="1110101010 (1) 1110001010" source="21983" target="22426" cy:directed="1"/>
      <edge id="24434" label="0100101010 (1) 0100101000" source="21982" target="22364" cy:directed="1"/>
      <edge id="24433" label="0100101010 (1) 0100100010" source="21982" target="22242" cy:directed="1"/>
      <edge id="24432" label="0100101010 (1) 0100111010" source="21982" target="21981" cy:directed="1"/>
      <edge id="24431" label="0100101010 (1) 0100001010" source="21982" target="22445" cy:directed="1"/>
      <edge id="24430" label="0100101010 (1) 0101101010" source="21982" target="22047" cy:directed="1"/>
      <edge id="24429" label="0100101010 (1) 0110101010" source="21982" target="21980" cy:directed="1"/>
      <edge id="24428" label="0100101010 (1) 0000101010" source="21982" target="22001" cy:directed="1"/>
      <edge id="24427" label="0100111010 (1) 0100111000" source="21981" target="22420" cy:directed="1"/>
      <edge id="24426" label="0100111010 (1) 0100111110" source="21981" target="21798" cy:directed="1"/>
      <edge id="24425" label="0100111010 (1) 0100110010" source="21981" target="22241" cy:directed="1"/>
      <edge id="24424" label="0100111010 (1) 0100011010" source="21981" target="22332" cy:directed="1"/>
      <edge id="24423" label="0100111010 (1) 0101111010" source="21981" target="21901" cy:directed="1"/>
      <edge id="24422" label="0100111010 (1) 0110111010" source="21981" target="21938" cy:directed="1"/>
      <edge id="24421" label="0100111010 (1) 0000111010" source="21981" target="22000" cy:directed="1"/>
      <edge id="24420" label="0110101010 (1) 0110101000" source="21980" target="22363" cy:directed="1"/>
      <edge id="24419" label="0110101010 (1) 0110100010" source="21980" target="22240" cy:directed="1"/>
      <edge id="24418" label="0110101010 (1) 0110111010" source="21980" target="21938" cy:directed="1"/>
      <edge id="24417" label="0110101010 (1) 0110001010" source="21980" target="22422" cy:directed="1"/>
      <edge id="24416" label="0110101010 (1) 0010101010" source="21980" target="21998" cy:directed="1"/>
      <edge id="24415" label="1000001001 (1) 1000001011" source="21979" target="21978" cy:directed="1"/>
      <edge id="24414" label="1000001001 (1) 1000001101" source="21979" target="21977" cy:directed="1"/>
      <edge id="24413" label="1000001001 (1) 1000000001" source="21979" target="22235" cy:directed="1"/>
      <edge id="24412" label="1000001001 (1) 1001001001" source="21979" target="21976" cy:directed="1"/>
      <edge id="24411" label="1000001001 (1) 1100001001" source="21979" target="21975" cy:directed="1"/>
      <edge id="24410" label="1000001011 (1) 1000001111" source="21978" target="21678" cy:directed="1"/>
      <edge id="24409" label="1000001011 (1) 1000000011" source="21978" target="22234" cy:directed="1"/>
      <edge id="24408" label="1000001011 (1) 1001001011" source="21978" target="21904" cy:directed="1"/>
      <edge id="24407" label="1000001011 (1) 1100001011" source="21978" target="21968" cy:directed="1"/>
      <edge id="24406" label="1000001101 (1) 1000001111" source="21977" target="21678" cy:directed="1"/>
      <edge id="24405" label="1000001101 (1) 1000000101" source="21977" target="22233" cy:directed="1"/>
      <edge id="24404" label="1000001101 (1) 1001001101" source="21977" target="21903" cy:directed="1"/>
      <edge id="24403" label="1000001101 (1) 1010001101" source="21977" target="21935" cy:directed="1"/>
      <edge id="24402" label="1000001101 (1) 1100001101" source="21977" target="21967" cy:directed="1"/>
      <edge id="24401" label="1001001001 (1) 1001001011" source="21976" target="21904" cy:directed="1"/>
      <edge id="24400" label="1001001001 (1) 1001001101" source="21976" target="21903" cy:directed="1"/>
      <edge id="24399" label="1001001001 (1) 1001000001" source="21976" target="22232" cy:directed="1"/>
      <edge id="24398" label="1001001001 (1) 1101001001" source="21976" target="21966" cy:directed="1"/>
      <edge id="24397" label="1100001001 (1) 1100001011" source="21975" target="21968" cy:directed="1"/>
      <edge id="24396" label="1100001001 (1) 1100001101" source="21975" target="21967" cy:directed="1"/>
      <edge id="24395" label="1100001001 (1) 1100000001" source="21975" target="22231" cy:directed="1"/>
      <edge id="24394" label="1100001001 (1) 1101001001" source="21975" target="21966" cy:directed="1"/>
      <edge id="24393" label="0000001001 (1) 0000001011" source="21974" target="21973" cy:directed="1"/>
      <edge id="24392" label="0000001001 (1) 0000001101" source="21974" target="21972" cy:directed="1"/>
      <edge id="24391" label="0000001001 (1) 0000000001" source="21974" target="22239" cy:directed="1"/>
      <edge id="24390" label="0000001001 (1) 0001001001" source="21974" target="21971" cy:directed="1"/>
      <edge id="24389" label="0000001011 (1) 0000001111" source="21973" target="21679" cy:directed="1"/>
      <edge id="24388" label="0000001011 (1) 0000000011" source="21973" target="22238" cy:directed="1"/>
      <edge id="24387" label="0000001011 (1) 0001001011" source="21973" target="21899" cy:directed="1"/>
      <edge id="24386" label="0000001101 (1) 0000001111" source="21972" target="21679" cy:directed="1"/>
      <edge id="24385" label="0000001101 (1) 0000000101" source="21972" target="22237" cy:directed="1"/>
      <edge id="24384" label="0000001101 (1) 0001001101" source="21972" target="21898" cy:directed="1"/>
      <edge id="24383" label="0000001101 (1) 0010001101" source="21972" target="21931" cy:directed="1"/>
      <edge id="24382" label="0001001001 (1) 0001001011" source="21971" target="21899" cy:directed="1"/>
      <edge id="24381" label="0001001001 (1) 0001001101" source="21971" target="21898" cy:directed="1"/>
      <edge id="24380" label="0001001001 (1) 0001000001" source="21971" target="22236" cy:directed="1"/>
      <edge id="24379" label="1110100110 (1) 1110100100" source="21970" target="22361" cy:directed="1"/>
      <edge id="24378" label="1110100110 (1) 1110100010" source="21970" target="22244" cy:directed="1"/>
      <edge id="24377" label="1110100110 (1) 1110110110" source="21970" target="21836" cy:directed="1"/>
      <edge id="24376" label="0110100110 (1) 0110100100" source="21969" target="22356" cy:directed="1"/>
      <edge id="24375" label="0110100110 (1) 0110100010" source="21969" target="22240" cy:directed="1"/>
      <edge id="24374" label="0110100110 (1) 0110110110" source="21969" target="21835" cy:directed="1"/>
      <edge id="24373" label="0110100110 (1) 0010100110" source="21969" target="21985" cy:directed="1"/>
      <edge id="24372" label="1100001011 (1) 1100001111" source="21968" target="21673" cy:directed="1"/>
      <edge id="24371" label="1100001011 (1) 1100000011" source="21968" target="22228" cy:directed="1"/>
      <edge id="24370" label="1100001011 (1) 1101001011" source="21968" target="21889" cy:directed="1"/>
      <edge id="24369" label="1100001101 (1) 1100001111" source="21967" target="21673" cy:directed="1"/>
      <edge id="24368" label="1100001101 (1) 1100000101" source="21967" target="22227" cy:directed="1"/>
      <edge id="24367" label="1100001101 (1) 1101001101" source="21967" target="21888" cy:directed="1"/>
      <edge id="24366" label="1101001001 (1) 1101001011" source="21966" target="21889" cy:directed="1"/>
      <edge id="24365" label="1101001001 (1) 1101001101" source="21966" target="21888" cy:directed="1"/>
      <edge id="24364" label="1101001001 (1) 1101000001" source="21966" target="22226" cy:directed="1"/>
      <edge id="24363" label="1101001001 (1) 1101101001" source="21966" target="21887" cy:directed="1"/>
      <edge id="24362" label="0100001001 (1) 0100001011" source="21965" target="21964" cy:directed="1"/>
      <edge id="24361" label="0100001001 (1) 0100001101" source="21965" target="21963" cy:directed="1"/>
      <edge id="24360" label="0100001001 (1) 0100000001" source="21965" target="22225" cy:directed="1"/>
      <edge id="24359" label="0100001001 (1) 0101001001" source="21965" target="21962" cy:directed="1"/>
      <edge id="24358" label="0100001001 (1) 0000001001" source="21965" target="21974" cy:directed="1"/>
      <edge id="24357" label="0100001011 (1) 0100001111" source="21964" target="21671" cy:directed="1"/>
      <edge id="24356" label="0100001011 (1) 0100000011" source="21964" target="22224" cy:directed="1"/>
      <edge id="24355" label="0100001011 (1) 0101001011" source="21964" target="21884" cy:directed="1"/>
      <edge id="24354" label="0100001011 (1) 0000001011" source="21964" target="21973" cy:directed="1"/>
      <edge id="24353" label="0100001101 (1) 0100001111" source="21963" target="21671" cy:directed="1"/>
      <edge id="24352" label="0100001101 (1) 0100000101" source="21963" target="22223" cy:directed="1"/>
      <edge id="24351" label="0100001101 (1) 0101001101" source="21963" target="21883" cy:directed="1"/>
      <edge id="24350" label="0100001101 (1) 0000001101" source="21963" target="21972" cy:directed="1"/>
      <edge id="24349" label="0101001001 (1) 0101001011" source="21962" target="21884" cy:directed="1"/>
      <edge id="24348" label="0101001001 (1) 0101001101" source="21962" target="21883" cy:directed="1"/>
      <edge id="24347" label="0101001001 (1) 0101000001" source="21962" target="22222" cy:directed="1"/>
      <edge id="24346" label="0101001001 (1) 0101101001" source="21962" target="21882" cy:directed="1"/>
      <edge id="24345" label="0101001001 (1) 0001001001" source="21962" target="21971" cy:directed="1"/>
      <edge id="24344" label="1001011110 (1) 1001010110" source="21961" target="22219" cy:directed="1"/>
      <edge id="24343" label="1001011110 (1) 1001001110" source="21961" target="22143" cy:directed="1"/>
      <edge id="24342" label="1001011110 (1) 1011011110" source="21961" target="21918" cy:directed="1"/>
      <edge id="24341" label="0001011110 (1) 0001010110" source="21960" target="22221" cy:directed="1"/>
      <edge id="24340" label="0001011110 (1) 0001001110" source="21960" target="22141" cy:directed="1"/>
      <edge id="24339" label="0001011110 (1) 0011011110" source="21960" target="21916" cy:directed="1"/>
      <edge id="24338" label="1011010001 (1) 1011010011" source="21959" target="21958" cy:directed="1"/>
      <edge id="24337" label="1011010001 (1) 1011010101" source="21959" target="21957" cy:directed="1"/>
      <edge id="24336" label="1011010001 (1) 1011011001" source="21959" target="21956" cy:directed="1"/>
      <edge id="24335" label="1011010001 (1) 1011000001" source="21959" target="22138" cy:directed="1"/>
      <edge id="24334" label="1011010001 (1) 1010010001" source="21959" target="22043" cy:directed="1"/>
      <edge id="24333" label="1011010001 (1) 1001010001" source="21959" target="22075" cy:directed="1"/>
      <edge id="24332" label="1011010011 (1) 1011010111" source="21958" target="21668" cy:directed="1"/>
      <edge id="24331" label="1011010011 (1) 1011000011" source="21958" target="22137" cy:directed="1"/>
      <edge id="24330" label="1011010011 (1) 1010010011" source="21958" target="22042" cy:directed="1"/>
      <edge id="24329" label="1011010011 (1) 1001010011" source="21958" target="22007" cy:directed="1"/>
      <edge id="24328" label="1011010101 (1) 1011010111" source="21957" target="21668" cy:directed="1"/>
      <edge id="24327" label="1011010101 (1) 1011011101" source="21957" target="21742" cy:directed="1"/>
      <edge id="24326" label="1011010101 (1) 1011000101" source="21957" target="22136" cy:directed="1"/>
      <edge id="24325" label="1011010101 (1) 1011110101" source="21957" target="21826" cy:directed="1"/>
      <edge id="24324" label="1011010101 (1) 1010010101" source="21957" target="22041" cy:directed="1"/>
      <edge id="24323" label="1011011001 (1) 1011011011" source="21956" target="21743" cy:directed="1"/>
      <edge id="24322" label="1011011001 (1) 1011011101" source="21956" target="21742" cy:directed="1"/>
      <edge id="24321" label="1011011001 (1) 1011001001" source="21956" target="21874" cy:directed="1"/>
      <edge id="24320" label="1011011001 (1) 1010011001" source="21956" target="22040" cy:directed="1"/>
      <edge id="24319" label="1011011001 (1) 1001011001" source="21956" target="22005" cy:directed="1"/>
      <edge id="24318" label="0011010001 (1) 0011010011" source="21955" target="21954" cy:directed="1"/>
      <edge id="24317" label="0011010001 (1) 0011010101" source="21955" target="21953" cy:directed="1"/>
      <edge id="24316" label="0011010001 (1) 0011011001" source="21955" target="21952" cy:directed="1"/>
      <edge id="24315" label="0011010001 (1) 0011000001" source="21955" target="22147" cy:directed="1"/>
      <edge id="24314" label="0011010001 (1) 0010010001" source="21955" target="22039" cy:directed="1"/>
      <edge id="24313" label="0011010001 (1) 0001010001" source="21955" target="22070" cy:directed="1"/>
      <edge id="24312" label="0011010011 (1) 0011010111" source="21954" target="21666" cy:directed="1"/>
      <edge id="24311" label="0011010011 (1) 0011000011" source="21954" target="22146" cy:directed="1"/>
      <edge id="24310" label="0011010011 (1) 0010010011" source="21954" target="22038" cy:directed="1"/>
      <edge id="24309" label="0011010011 (1) 0001010011" source="21954" target="22004" cy:directed="1"/>
      <edge id="24308" label="0011010101 (1) 0011010111" source="21953" target="21666" cy:directed="1"/>
      <edge id="24307" label="0011010101 (1) 0011011101" source="21953" target="21740" cy:directed="1"/>
      <edge id="24306" label="0011010101 (1) 0011000101" source="21953" target="22145" cy:directed="1"/>
      <edge id="24305" label="0011010101 (1) 0011110101" source="21953" target="21823" cy:directed="1"/>
      <edge id="24304" label="0011010101 (1) 0010010101" source="21953" target="22037" cy:directed="1"/>
      <edge id="24303" label="0011011001 (1) 0011011011" source="21952" target="21741" cy:directed="1"/>
      <edge id="24302" label="0011011001 (1) 0011011101" source="21952" target="21740" cy:directed="1"/>
      <edge id="24301" label="0011011001 (1) 0011001001" source="21952" target="21869" cy:directed="1"/>
      <edge id="24300" label="0011011001 (1) 0010011001" source="21952" target="22036" cy:directed="1"/>
      <edge id="24299" label="0011011001 (1) 0001011001" source="21952" target="22002" cy:directed="1"/>
      <edge id="24298" label="1101011110 (1) 1101010110" source="21951" target="22214" cy:directed="1"/>
      <edge id="24297" label="1101011110 (1) 1101001110" source="21951" target="22134" cy:directed="1"/>
      <edge id="24296" label="1101011110 (1) 1101111110" source="21951" target="21761" cy:directed="1"/>
      <edge id="24295" label="1101011110 (1) 1001011110" source="21951" target="21961" cy:directed="1"/>
      <edge id="24294" label="0010111010 (1) 0010111000" source="21950" target="22417" cy:directed="1"/>
      <edge id="24293" label="0010111010 (1) 0010111110" source="21950" target="21778" cy:directed="1"/>
      <edge id="24292" label="0010111010 (1) 0010110010" source="21950" target="22216" cy:directed="1"/>
      <edge id="24291" label="0010111010 (1) 0010011010" source="21950" target="22320" cy:directed="1"/>
      <edge id="24290" label="0101011110 (1) 0101010110" source="21949" target="22215" cy:directed="1"/>
      <edge id="24289" label="0101011110 (1) 0101001110" source="21949" target="22132" cy:directed="1"/>
      <edge id="24288" label="0101011110 (1) 0101111110" source="21949" target="21760" cy:directed="1"/>
      <edge id="24287" label="0101011110 (1) 0001011110" source="21949" target="21960" cy:directed="1"/>
      <edge id="24286" label="1010111010 (1) 1010111000" source="21948" target="22419" cy:directed="1"/>
      <edge id="24285" label="1010111010 (1) 1010111110" source="21948" target="21779" cy:directed="1"/>
      <edge id="24284" label="1010111010 (1) 1010110010" source="21948" target="22217" cy:directed="1"/>
      <edge id="24283" label="1010111010 (1) 1010011010" source="21948" target="22323" cy:directed="1"/>
      <edge id="24282" label="0111010001 (1) 0111010011" source="21947" target="21946" cy:directed="1"/>
      <edge id="24281" label="0111010001 (1) 0111010101" source="21947" target="21945" cy:directed="1"/>
      <edge id="24280" label="0111010001 (1) 0111011001" source="21947" target="21944" cy:directed="1"/>
      <edge id="24279" label="0111010001 (1) 0111000001" source="21947" target="22127" cy:directed="1"/>
      <edge id="24278" label="0111010001 (1) 0111110001" source="21947" target="22018" cy:directed="1"/>
      <edge id="24277" label="0111010001 (1) 0110010001" source="21947" target="22023" cy:directed="1"/>
      <edge id="24276" label="0111010001 (1) 0101010001" source="21947" target="22050" cy:directed="1"/>
      <edge id="24275" label="0111010001 (1) 0011010001" source="21947" target="21955" cy:directed="1"/>
      <edge id="24274" label="0111010011 (1) 0111010111" source="21946" target="21665" cy:directed="1"/>
      <edge id="24273" label="0111010011 (1) 0111000011" source="21946" target="22126" cy:directed="1"/>
      <edge id="24272" label="0111010011 (1) 0111110011" source="21946" target="21634" cy:directed="1"/>
      <edge id="24271" label="0111010011 (1) 0110010011" source="21946" target="22022" cy:directed="1"/>
      <edge id="24270" label="0111010011 (1) 0101010011" source="21946" target="21989" cy:directed="1"/>
      <edge id="24269" label="0111010011 (1) 0011010011" source="21946" target="21954" cy:directed="1"/>
      <edge id="24268" label="0111010101 (1) 0111010111" source="21945" target="21665" cy:directed="1"/>
      <edge id="24267" label="0111010101 (1) 0111011101" source="21945" target="21736" cy:directed="1"/>
      <edge id="24266" label="0111010101 (1) 0111000101" source="21945" target="22125" cy:directed="1"/>
      <edge id="24265" label="0111010101 (1) 0111110101" source="21945" target="21819" cy:directed="1"/>
      <edge id="24264" label="0111010101 (1) 0110010101" source="21945" target="22021" cy:directed="1"/>
      <edge id="24263" label="0111010101 (1) 0101010101" source="21945" target="21988" cy:directed="1"/>
      <edge id="24262" label="0111010101 (1) 0011010101" source="21945" target="21953" cy:directed="1"/>
      <edge id="24261" label="0111011001 (1) 0111011011" source="21944" target="21737" cy:directed="1"/>
      <edge id="24260" label="0111011001 (1) 0111011101" source="21944" target="21736" cy:directed="1"/>
      <edge id="24259" label="0111011001 (1) 0111001001" source="21944" target="21855" cy:directed="1"/>
      <edge id="24258" label="0111011001 (1) 0111111001" source="21944" target="21818" cy:directed="1"/>
      <edge id="24257" label="0111011001 (1) 0110011001" source="21944" target="22020" cy:directed="1"/>
      <edge id="24256" label="0111011001 (1) 0101011001" source="21944" target="21987" cy:directed="1"/>
      <edge id="24255" label="0111011001 (1) 0011011001" source="21944" target="21952" cy:directed="1"/>
      <edge id="24254" label="1111010001 (1) 1111010011" source="21943" target="21942" cy:directed="1"/>
      <edge id="24253" label="1111010001 (1) 1111010101" source="21943" target="21941" cy:directed="1"/>
      <edge id="24252" label="1111010001 (1) 1111011001" source="21943" target="21940" cy:directed="1"/>
      <edge id="24251" label="1111010001 (1) 1111000001" source="21943" target="22135" cy:directed="1"/>
      <edge id="24250" label="1111010001 (1) 1111110001" source="21943" target="22024" cy:directed="1"/>
      <edge id="24249" label="1111010001 (1) 1110010001" source="21943" target="22029" cy:directed="1"/>
      <edge id="24248" label="1111010001 (1) 1101010001" source="21943" target="22057" cy:directed="1"/>
      <edge id="24247" label="1111010001 (1) 1011010001" source="21943" target="21959" cy:directed="1"/>
      <edge id="24246" label="1111010011 (1) 1111010111" source="21942" target="21664" cy:directed="1"/>
      <edge id="24245" label="1111010011 (1) 1111000011" source="21942" target="22130" cy:directed="1"/>
      <edge id="24244" label="1111010011 (1) 1111110011" source="21942" target="21636" cy:directed="1"/>
      <edge id="24243" label="1111010011 (1) 1110010011" source="21942" target="22028" cy:directed="1"/>
      <edge id="24242" label="1111010011 (1) 1101010011" source="21942" target="21992" cy:directed="1"/>
      <edge id="24241" label="1111010011 (1) 1011010011" source="21942" target="21958" cy:directed="1"/>
      <edge id="24240" label="1111010101 (1) 1111010111" source="21941" target="21664" cy:directed="1"/>
      <edge id="24239" label="1111010101 (1) 1111011101" source="21941" target="21734" cy:directed="1"/>
      <edge id="24238" label="1111010101 (1) 1111000101" source="21941" target="22129" cy:directed="1"/>
      <edge id="24237" label="1111010101 (1) 1111110101" source="21941" target="21821" cy:directed="1"/>
      <edge id="24236" label="1111010101 (1) 1110010101" source="21941" target="22027" cy:directed="1"/>
      <edge id="24235" label="1111010101 (1) 1101010101" source="21941" target="21991" cy:directed="1"/>
      <edge id="24234" label="1111010101 (1) 1011010101" source="21941" target="21957" cy:directed="1"/>
      <edge id="24233" label="1111011001 (1) 1111011011" source="21940" target="21735" cy:directed="1"/>
      <edge id="24232" label="1111011001 (1) 1111011101" source="21940" target="21734" cy:directed="1"/>
      <edge id="24231" label="1111011001 (1) 1111001001" source="21940" target="21871" cy:directed="1"/>
      <edge id="24230" label="1111011001 (1) 1111111001" source="21940" target="21820" cy:directed="1"/>
      <edge id="24229" label="1111011001 (1) 1110011001" source="21940" target="22026" cy:directed="1"/>
      <edge id="24228" label="1111011001 (1) 1101011001" source="21940" target="21990" cy:directed="1"/>
      <edge id="24227" label="1111011001 (1) 1011011001" source="21940" target="21956" cy:directed="1"/>
      <edge id="24226" label="1110111010 (1) 1110111000" source="21939" target="22415" cy:directed="1"/>
      <edge id="24225" label="1110111010 (1) 1110111110" source="21939" target="21776" cy:directed="1"/>
      <edge id="24224" label="1110111010 (1) 1110110010" source="21939" target="22213" cy:directed="1"/>
      <edge id="24223" label="1110111010 (1) 1110011010" source="21939" target="22317" cy:directed="1"/>
      <edge id="24222" label="1110111010 (1) 1010111010" source="21939" target="21948" cy:directed="1"/>
      <edge id="24221" label="0110111010 (1) 0110111000" source="21938" target="22412" cy:directed="1"/>
      <edge id="24220" label="0110111010 (1) 0110111110" source="21938" target="21777" cy:directed="1"/>
      <edge id="24219" label="0110111010 (1) 0110110010" source="21938" target="22203" cy:directed="1"/>
      <edge id="24218" label="0110111010 (1) 0110011010" source="21938" target="22314" cy:directed="1"/>
      <edge id="24217" label="0110111010 (1) 0010111010" source="21938" target="21950" cy:directed="1"/>
      <edge id="24216" label="1010001001 (1) 1010001011" source="21937" target="21936" cy:directed="1"/>
      <edge id="24215" label="1010001001 (1) 1010001101" source="21937" target="21935" cy:directed="1"/>
      <edge id="24214" label="1010001001 (1) 1010000001" source="21937" target="22202" cy:directed="1"/>
      <edge id="24213" label="1010001001 (1) 1000001001" source="21937" target="21979" cy:directed="1"/>
      <edge id="24212" label="1010001001 (1) 1110001001" source="21937" target="21934" cy:directed="1"/>
      <edge id="24211" label="1010001011 (1) 1010001111" source="21936" target="21662" cy:directed="1"/>
      <edge id="24210" label="1010001011 (1) 1010000011" source="21936" target="22201" cy:directed="1"/>
      <edge id="24209" label="1010001011 (1) 1000001011" source="21936" target="21978" cy:directed="1"/>
      <edge id="24208" label="1010001011 (1) 1110001011" source="21936" target="21928" cy:directed="1"/>
      <edge id="24207" label="1010001101 (1) 1010001111" source="21935" target="21662" cy:directed="1"/>
      <edge id="24206" label="1010001101 (1) 1010000101" source="21935" target="22200" cy:directed="1"/>
      <edge id="24205" label="1010001101 (1) 1110001101" source="21935" target="21927" cy:directed="1"/>
      <edge id="24204" label="1110001001 (1) 1110001011" source="21934" target="21928" cy:directed="1"/>
      <edge id="24203" label="1110001001 (1) 1110001101" source="21934" target="21927" cy:directed="1"/>
      <edge id="24202" label="1110001001 (1) 1110000001" source="21934" target="22199" cy:directed="1"/>
      <edge id="24201" label="1110001001 (1) 1100001001" source="21934" target="21975" cy:directed="1"/>
      <edge id="24200" label="0010001001 (1) 0010001011" source="21933" target="21932" cy:directed="1"/>
      <edge id="24199" label="0010001001 (1) 0010001101" source="21933" target="21931" cy:directed="1"/>
      <edge id="24198" label="0010001001 (1) 0010000001" source="21933" target="22198" cy:directed="1"/>
      <edge id="24197" label="0010001001 (1) 0000001001" source="21933" target="21974" cy:directed="1"/>
      <edge id="24196" label="0010001011 (1) 0010001111" source="21932" target="21663" cy:directed="1"/>
      <edge id="24195" label="0010001011 (1) 0010000011" source="21932" target="22197" cy:directed="1"/>
      <edge id="24194" label="0010001011 (1) 0000001011" source="21932" target="21973" cy:directed="1"/>
      <edge id="24193" label="0010001101 (1) 0010001111" source="21931" target="21663" cy:directed="1"/>
      <edge id="24192" label="0010001101 (1) 0010000101" source="21931" target="22196" cy:directed="1"/>
      <edge id="24191" label="1001100110 (1) 1001100100" source="21930" target="22352" cy:directed="1"/>
      <edge id="24190" label="1001100110 (1) 1001100010" source="21930" target="22253" cy:directed="1"/>
      <edge id="24189" label="1001100110 (1) 1001110110" source="21930" target="21815" cy:directed="1"/>
      <edge id="24188" label="1001100110 (1) 1011100110" source="21930" target="21902" cy:directed="1"/>
      <edge id="24187" label="1001100110 (1) 1101100110" source="21930" target="21919" cy:directed="1"/>
      <edge id="24186" label="0001100110 (1) 0001100100" source="21929" target="22349" cy:directed="1"/>
      <edge id="24185" label="0001100110 (1) 0001100010" source="21929" target="22248" cy:directed="1"/>
      <edge id="24184" label="0001100110 (1) 0001110110" source="21929" target="21814" cy:directed="1"/>
      <edge id="24183" label="0001100110 (1) 0011100110" source="21929" target="21900" cy:directed="1"/>
      <edge id="24182" label="1110001011 (1) 1110001111" source="21928" target="21655" cy:directed="1"/>
      <edge id="24181" label="1110001011 (1) 1110000011" source="21928" target="22188" cy:directed="1"/>
      <edge id="24180" label="1110001011 (1) 1100001011" source="21928" target="21968" cy:directed="1"/>
      <edge id="24179" label="1110001101 (1) 1110001111" source="21927" target="21655" cy:directed="1"/>
      <edge id="24178" label="1110001101 (1) 1110000101" source="21927" target="22187" cy:directed="1"/>
      <edge id="24177" label="1110001101 (1) 1100001101" source="21927" target="21967" cy:directed="1"/>
      <edge id="24176" label="0110001001 (1) 0110001011" source="21926" target="21925" cy:directed="1"/>
      <edge id="24175" label="0110001001 (1) 0110001101" source="21926" target="21924" cy:directed="1"/>
      <edge id="24174" label="0110001001 (1) 0110000001" source="21926" target="22186" cy:directed="1"/>
      <edge id="24173" label="0110001001 (1) 0100001001" source="21926" target="21965" cy:directed="1"/>
      <edge id="24172" label="0110001001 (1) 0010001001" source="21926" target="21933" cy:directed="1"/>
      <edge id="24171" label="0110001011 (1) 0110001111" source="21925" target="21651" cy:directed="1"/>
      <edge id="24170" label="0110001011 (1) 0110000011" source="21925" target="22185" cy:directed="1"/>
      <edge id="24169" label="0110001011 (1) 0100001011" source="21925" target="21964" cy:directed="1"/>
      <edge id="24168" label="0110001011 (1) 0010001011" source="21925" target="21932" cy:directed="1"/>
      <edge id="24167" label="0110001101 (1) 0110001111" source="21924" target="21651" cy:directed="1"/>
      <edge id="24166" label="0110001101 (1) 0110000101" source="21924" target="22184" cy:directed="1"/>
      <edge id="24165" label="0110001101 (1) 0100001101" source="21924" target="21963" cy:directed="1"/>
      <edge id="24164" label="0110001101 (1) 0010001101" source="21924" target="21931" cy:directed="1"/>
      <edge id="24163" label="0000110101 (1) 0000111101" source="21923" target="21733" cy:directed="1"/>
      <edge id="24162" label="0000110101 (1) 0001110101" source="21923" target="21857" cy:directed="1"/>
      <edge id="24161" label="0000110101 (1) 0010110101" source="21923" target="21895" cy:directed="1"/>
      <edge id="24160" label="0000111001 (1) 0000111101" source="21922" target="21733" cy:directed="1"/>
      <edge id="24159" label="0000111001 (1) 0000011001" source="21922" target="22071" cy:directed="1"/>
      <edge id="24158" label="0000111001 (1) 0001111001" source="21922" target="21856" cy:directed="1"/>
      <edge id="24157" label="0000111001 (1) 0010111001" source="21922" target="21894" cy:directed="1"/>
      <edge id="24156" label="1000110101 (1) 1000111101" source="21921" target="21732" cy:directed="1"/>
      <edge id="24155" label="1000110101 (1) 1001110101" source="21921" target="21860" cy:directed="1"/>
      <edge id="24154" label="1000110101 (1) 1010110101" source="21921" target="21897" cy:directed="1"/>
      <edge id="24153" label="1000111001 (1) 1000111101" source="21920" target="21732" cy:directed="1"/>
      <edge id="24152" label="1000111001 (1) 1000011001" source="21920" target="22076" cy:directed="1"/>
      <edge id="24151" label="1000111001 (1) 1001111001" source="21920" target="21859" cy:directed="1"/>
      <edge id="24150" label="1000111001 (1) 1010111001" source="21920" target="21896" cy:directed="1"/>
      <edge id="24149" label="1101100110 (1) 1101100100" source="21919" target="22346" cy:directed="1"/>
      <edge id="24148" label="1101100110 (1) 1101100010" source="21919" target="22299" cy:directed="1"/>
      <edge id="24147" label="1101100110 (1) 1101110110" source="21919" target="21811" cy:directed="1"/>
      <edge id="24146" label="1101100110 (1) 1111100110" source="21919" target="21893" cy:directed="1"/>
      <edge id="24145" label="1011011110 (1) 1011010110" source="21918" target="22180" cy:directed="1"/>
      <edge id="24144" label="1011011110 (1) 1011001110" source="21918" target="22112" cy:directed="1"/>
      <edge id="24143" label="1011011110 (1) 1010011110" source="21918" target="22014" cy:directed="1"/>
      <edge id="24142" label="0101100110 (1) 0101100100" source="21917" target="22344" cy:directed="1"/>
      <edge id="24141" label="0101100110 (1) 0101100010" source="21917" target="22295" cy:directed="1"/>
      <edge id="24140" label="0101100110 (1) 0101110110" source="21917" target="21809" cy:directed="1"/>
      <edge id="24139" label="0101100110 (1) 0111100110" source="21917" target="21892" cy:directed="1"/>
      <edge id="24138" label="0101100110 (1) 0001100110" source="21917" target="21929" cy:directed="1"/>
      <edge id="24137" label="0011011110 (1) 0011010110" source="21916" target="22181" cy:directed="1"/>
      <edge id="24136" label="0011011110 (1) 0011001110" source="21916" target="22110" cy:directed="1"/>
      <edge id="24135" label="0011011110 (1) 0010011110" source="21916" target="22011" cy:directed="1"/>
      <edge id="24134" label="1100110101 (1) 1100111101" source="21915" target="21728" cy:directed="1"/>
      <edge id="24133" label="1100110101 (1) 1101110101" source="21915" target="21851" cy:directed="1"/>
      <edge id="24132" label="1100110101 (1) 1110110101" source="21915" target="21891" cy:directed="1"/>
      <edge id="24131" label="1100110101 (1) 1000110101" source="21915" target="21921" cy:directed="1"/>
      <edge id="24130" label="1100111001 (1) 1100111101" source="21914" target="21728" cy:directed="1"/>
      <edge id="24129" label="1100111001 (1) 1100011001" source="21914" target="22058" cy:directed="1"/>
      <edge id="24128" label="1100111001 (1) 1101111001" source="21914" target="21850" cy:directed="1"/>
      <edge id="24127" label="1100111001 (1) 1110111001" source="21914" target="21890" cy:directed="1"/>
      <edge id="24126" label="1100111001 (1) 1000111001" source="21914" target="21920" cy:directed="1"/>
      <edge id="24125" label="0100110101 (1) 0100111101" source="21913" target="21729" cy:directed="1"/>
      <edge id="24124" label="0100110101 (1) 0101110101" source="21913" target="21849" cy:directed="1"/>
      <edge id="24123" label="0100110101 (1) 0110110101" source="21913" target="21886" cy:directed="1"/>
      <edge id="24122" label="0100110101 (1) 0000110101" source="21913" target="21923" cy:directed="1"/>
      <edge id="24121" label="0100111001 (1) 0100111101" source="21912" target="21729" cy:directed="1"/>
      <edge id="24120" label="0100111001 (1) 0100011001" source="21912" target="22051" cy:directed="1"/>
      <edge id="24119" label="0100111001 (1) 0101111001" source="21912" target="21848" cy:directed="1"/>
      <edge id="24118" label="0100111001 (1) 0110111001" source="21912" target="21885" cy:directed="1"/>
      <edge id="24117" label="0100111001 (1) 0000111001" source="21912" target="21922" cy:directed="1"/>
      <edge id="24116" label="0111011110 (1) 0111010110" source="21911" target="22178" cy:directed="1"/>
      <edge id="24115" label="0111011110 (1) 0111001110" source="21911" target="22099" cy:directed="1"/>
      <edge id="24114" label="0111011110 (1) 0111111110" source="21911" target="21748" cy:directed="1"/>
      <edge id="24113" label="0111011110 (1) 0110011110" source="21911" target="22008" cy:directed="1"/>
      <edge id="24112" label="0111011110 (1) 0101011110" source="21911" target="21949" cy:directed="1"/>
      <edge id="24111" label="0111011110 (1) 0011011110" source="21911" target="21916" cy:directed="1"/>
      <edge id="24110" label="1111011110 (1) 1111010110" source="21910" target="22176" cy:directed="1"/>
      <edge id="24109" label="1111011110 (1) 1111001110" source="21910" target="22102" cy:directed="1"/>
      <edge id="24108" label="1111011110 (1) 1111111110" source="21910" target="21749" cy:directed="1"/>
      <edge id="24107" label="1111011110 (1) 1110011110" source="21910" target="22009" cy:directed="1"/>
      <edge id="24106" label="1111011110 (1) 1101011110" source="21910" target="21951" cy:directed="1"/>
      <edge id="24105" label="1111011110 (1) 1011011110" source="21910" target="21918" cy:directed="1"/>
      <edge id="24104" label="0001111010 (1) 0001111000" source="21909" target="22387" cy:directed="1"/>
      <edge id="24103" label="0001111010 (1) 0001111110" source="21909" target="21762" cy:directed="1"/>
      <edge id="24102" label="0001111010 (1) 0001110010" source="21909" target="22170" cy:directed="1"/>
      <edge id="24101" label="0001111010 (1) 0001011010" source="21909" target="22306" cy:directed="1"/>
      <edge id="24100" label="0001111010 (1) 0011111010" source="21909" target="21879" cy:directed="1"/>
      <edge id="24099" label="0011101010 (1) 0011101000" source="21908" target="22339" cy:directed="1"/>
      <edge id="24098" label="0011101010 (1) 0011100010" source="21908" target="22169" cy:directed="1"/>
      <edge id="24097" label="0011101010 (1) 0011111010" source="21908" target="21879" cy:directed="1"/>
      <edge id="24096" label="0011101010 (1) 0011001010" source="21908" target="22399" cy:directed="1"/>
      <edge id="24095" label="0011101010 (1) 0010101010" source="21908" target="21998" cy:directed="1"/>
      <edge id="24094" label="1001111010 (1) 1001111000" source="21907" target="22390" cy:directed="1"/>
      <edge id="24093" label="1001111010 (1) 1001111110" source="21907" target="21763" cy:directed="1"/>
      <edge id="24092" label="1001111010 (1) 1001110010" source="21907" target="22173" cy:directed="1"/>
      <edge id="24091" label="1001111010 (1) 1001011010" source="21907" target="22308" cy:directed="1"/>
      <edge id="24090" label="1001111010 (1) 1011111010" source="21907" target="21878" cy:directed="1"/>
      <edge id="24089" label="1011101010 (1) 1011101000" source="21906" target="22338" cy:directed="1"/>
      <edge id="24088" label="1011101010 (1) 1011100010" source="21906" target="22172" cy:directed="1"/>
      <edge id="24087" label="1011101010 (1) 1011111010" source="21906" target="21878" cy:directed="1"/>
      <edge id="24086" label="1011101010 (1) 1011001010" source="21906" target="22408" cy:directed="1"/>
      <edge id="24085" label="1011101010 (1) 1010101010" source="21906" target="21994" cy:directed="1"/>
      <edge id="24084" label="1011101010 (1) 1111101010" source="21906" target="22013" cy:directed="1"/>
      <edge id="24083" label="1101111010 (1) 1101111000" source="21905" target="22379" cy:directed="1"/>
      <edge id="24082" label="1101111010 (1) 1101111110" source="21905" target="21761" cy:directed="1"/>
      <edge id="24081" label="1101111010 (1) 1101110010" source="21905" target="22167" cy:directed="1"/>
      <edge id="24080" label="1101111010 (1) 1111111010" source="21905" target="21876" cy:directed="1"/>
      <edge id="24079" label="1101111010 (1) 1001111010" source="21905" target="21907" cy:directed="1"/>
      <edge id="24078" label="1001001011 (1) 1001001111" source="21904" target="21638" cy:directed="1"/>
      <edge id="24077" label="1001001011 (1) 1001000011" source="21904" target="22164" cy:directed="1"/>
      <edge id="24076" label="1001001011 (1) 1101001011" source="21904" target="21889" cy:directed="1"/>
      <edge id="24075" label="1001001101 (1) 1001001111" source="21903" target="21638" cy:directed="1"/>
      <edge id="24074" label="1001001101 (1) 1001000101" source="21903" target="22163" cy:directed="1"/>
      <edge id="24073" label="1001001101 (1) 1011001101" source="21903" target="21872" cy:directed="1"/>
      <edge id="24072" label="1001001101 (1) 1101001101" source="21903" target="21888" cy:directed="1"/>
      <edge id="24071" label="1011100110 (1) 1011100100" source="21902" target="22334" cy:directed="1"/>
      <edge id="24070" label="1011100110 (1) 1011100010" source="21902" target="22172" cy:directed="1"/>
      <edge id="24069" label="1011100110 (1) 1011110110" source="21902" target="21801" cy:directed="1"/>
      <edge id="24068" label="1011100110 (1) 1010100110" source="21902" target="21986" cy:directed="1"/>
      <edge id="24067" label="1011100110 (1) 1111100110" source="21902" target="21893" cy:directed="1"/>
      <edge id="24066" label="0101111010 (1) 0101111000" source="21901" target="22378" cy:directed="1"/>
      <edge id="24065" label="0101111010 (1) 0101111110" source="21901" target="21760" cy:directed="1"/>
      <edge id="24064" label="0101111010 (1) 0101110010" source="21901" target="22161" cy:directed="1"/>
      <edge id="24063" label="0101111010 (1) 0111111010" source="21901" target="21866" cy:directed="1"/>
      <edge id="24062" label="0101111010 (1) 0001111010" source="21901" target="21909" cy:directed="1"/>
      <edge id="24061" label="0011100110 (1) 0011100100" source="21900" target="22329" cy:directed="1"/>
      <edge id="24060" label="0011100110 (1) 0011100010" source="21900" target="22169" cy:directed="1"/>
      <edge id="24059" label="0011100110 (1) 0011110110" source="21900" target="21800" cy:directed="1"/>
      <edge id="24058" label="0011100110 (1) 0010100110" source="21900" target="21985" cy:directed="1"/>
      <edge id="24057" label="0001001011 (1) 0001001111" source="21899" target="21639" cy:directed="1"/>
      <edge id="24056" label="0001001011 (1) 0001000011" source="21899" target="22166" cy:directed="1"/>
      <edge id="24055" label="0001001101 (1) 0001001111" source="21898" target="21639" cy:directed="1"/>
      <edge id="24054" label="0001001101 (1) 0001000101" source="21898" target="22165" cy:directed="1"/>
      <edge id="24053" label="0001001101 (1) 0011001101" source="21898" target="21867" cy:directed="1"/>
      <edge id="24052" label="1010110101 (1) 1010111101" source="21897" target="21710" cy:directed="1"/>
      <edge id="24051" label="1010111001 (1) 1010111101" source="21896" target="21710" cy:directed="1"/>
      <edge id="24050" label="1010111001 (1) 1010011001" source="21896" target="22040" cy:directed="1"/>
      <edge id="24049" label="0010110101 (1) 0010111101" source="21895" target="21709" cy:directed="1"/>
      <edge id="24048" label="0010111001 (1) 0010111101" source="21894" target="21709" cy:directed="1"/>
      <edge id="24047" label="0010111001 (1) 0010011001" source="21894" target="22036" cy:directed="1"/>
      <edge id="24046" label="1111100110 (1) 1111100100" source="21893" target="22327" cy:directed="1"/>
      <edge id="24045" label="1111100110 (1) 1111100010" source="21893" target="22268" cy:directed="1"/>
      <edge id="24044" label="1111100110 (1) 1111110110" source="21893" target="21791" cy:directed="1"/>
      <edge id="24043" label="1111100110 (1) 1110100110" source="21893" target="21970" cy:directed="1"/>
      <edge id="24042" label="0111100110 (1) 0111100100" source="21892" target="22324" cy:directed="1"/>
      <edge id="24041" label="0111100110 (1) 0111100010" source="21892" target="22264" cy:directed="1"/>
      <edge id="24040" label="0111100110 (1) 0111110110" source="21892" target="21790" cy:directed="1"/>
      <edge id="24039" label="0111100110 (1) 0110100110" source="21892" target="21969" cy:directed="1"/>
      <edge id="24038" label="0111100110 (1) 0011100110" source="21892" target="21900" cy:directed="1"/>
      <edge id="24037" label="1110110101 (1) 1110111101" source="21891" target="21699" cy:directed="1"/>
      <edge id="24036" label="1110110101 (1) 1010110101" source="21891" target="21897" cy:directed="1"/>
      <edge id="24035" label="1110111001 (1) 1110111101" source="21890" target="21699" cy:directed="1"/>
      <edge id="24034" label="1110111001 (1) 1110011001" source="21890" target="22026" cy:directed="1"/>
      <edge id="24033" label="1110111001 (1) 1010111001" source="21890" target="21896" cy:directed="1"/>
      <edge id="24032" label="1101001011 (1) 1101001111" source="21889" target="21633" cy:directed="1"/>
      <edge id="24031" label="1101001011 (1) 1101000011" source="21889" target="22155" cy:directed="1"/>
      <edge id="24030" label="1101001011 (1) 1101101011" source="21889" target="21619" cy:directed="1"/>
      <edge id="24029" label="1101001101 (1) 1101001111" source="21888" target="21633" cy:directed="1"/>
      <edge id="24028" label="1101001101 (1) 1101000101" source="21888" target="22154" cy:directed="1"/>
      <edge id="24027" label="1101001101 (1) 1101101101" source="21888" target="21785" cy:directed="1"/>
      <edge id="24026" label="1101101001 (1) 1101101101" source="21887" target="21785" cy:directed="1"/>
      <edge id="24025" label="1101101001 (1) 1101100001" source="21887" target="22153" cy:directed="1"/>
      <edge id="24024" label="1101101001 (1) 1101111001" source="21887" target="21850" cy:directed="1"/>
      <edge id="24023" label="1101101001 (1) 1111101001" source="21887" target="21861" cy:directed="1"/>
      <edge id="24022" label="0110110101 (1) 0110111101" source="21886" target="21698" cy:directed="1"/>
      <edge id="24021" label="0110110101 (1) 0010110101" source="21886" target="21895" cy:directed="1"/>
      <edge id="24020" label="0110111001 (1) 0110111101" source="21885" target="21698" cy:directed="1"/>
      <edge id="24019" label="0110111001 (1) 0110011001" source="21885" target="22020" cy:directed="1"/>
      <edge id="24018" label="0110111001 (1) 0010111001" source="21885" target="21894" cy:directed="1"/>
      <edge id="24017" label="0101001011 (1) 0101001111" source="21884" target="21632" cy:directed="1"/>
      <edge id="24016" label="0101001011 (1) 0101000011" source="21884" target="22152" cy:directed="1"/>
      <edge id="24015" label="0101001011 (1) 0101101011" source="21884" target="21617" cy:directed="1"/>
      <edge id="24014" label="0101001011 (1) 0001001011" source="21884" target="21899" cy:directed="1"/>
      <edge id="24013" label="0101001101 (1) 0101001111" source="21883" target="21632" cy:directed="1"/>
      <edge id="24012" label="0101001101 (1) 0101000101" source="21883" target="22151" cy:directed="1"/>
      <edge id="24011" label="0101001101 (1) 0101101101" source="21883" target="21784" cy:directed="1"/>
      <edge id="24010" label="0101001101 (1) 0001001101" source="21883" target="21898" cy:directed="1"/>
      <edge id="24009" label="0101101001 (1) 0101101101" source="21882" target="21784" cy:directed="1"/>
      <edge id="24008" label="0101101001 (1) 0101100001" source="21882" target="22150" cy:directed="1"/>
      <edge id="24007" label="0101101001 (1) 0101111001" source="21882" target="21848" cy:directed="1"/>
      <edge id="24006" label="0101101001 (1) 0111101001" source="21882" target="21852" cy:directed="1"/>
      <edge id="24005" label="0101101001 (1) 0001101001" source="21882" target="21843" cy:directed="1"/>
      <edge id="24004" label="1000110110 (1) 1000110100" source="21881" target="22321" cy:directed="1"/>
      <edge id="24003" label="1000110110 (1) 1000110010" source="21881" target="22254" cy:directed="1"/>
      <edge id="24002" label="1000110110 (1) 1001110110" source="21881" target="21815" cy:directed="1"/>
      <edge id="24001" label="1000110110 (1) 1010110110" source="21881" target="21847" cy:directed="1"/>
      <edge id="24000" label="0000110110 (1) 0000110100" source="21880" target="22318" cy:directed="1"/>
      <edge id="23999" label="0000110110 (1) 0000110010" source="21880" target="22249" cy:directed="1"/>
      <edge id="23998" label="0000110110 (1) 0001110110" source="21880" target="21814" cy:directed="1"/>
      <edge id="23997" label="0000110110 (1) 0010110110" source="21880" target="21846" cy:directed="1"/>
      <edge id="23996" label="0011111010 (1) 0011111000" source="21879" target="22359" cy:directed="1"/>
      <edge id="23995" label="0011111010 (1) 0011111110" source="21879" target="21750" cy:directed="1"/>
      <edge id="23994" label="0011111010 (1) 0011110010" source="21879" target="22148" cy:directed="1"/>
      <edge id="23993" label="0011111010 (1) 0011011010" source="21879" target="22293" cy:directed="1"/>
      <edge id="23992" label="0011111010 (1) 0010111010" source="21879" target="21950" cy:directed="1"/>
      <edge id="23991" label="1011111010 (1) 1011111000" source="21878" target="22360" cy:directed="1"/>
      <edge id="23990" label="1011111010 (1) 1011111110" source="21878" target="21751" cy:directed="1"/>
      <edge id="23989" label="1011111010 (1) 1011110010" source="21878" target="22149" cy:directed="1"/>
      <edge id="23988" label="1011111010 (1) 1011011010" source="21878" target="22297" cy:directed="1"/>
      <edge id="23987" label="1011111010 (1) 1010111010" source="21878" target="21948" cy:directed="1"/>
      <edge id="23986" label="1100110110 (1) 1100110100" source="21877" target="22315" cy:directed="1"/>
      <edge id="23985" label="1100110110 (1) 1100110010" source="21877" target="22245" cy:directed="1"/>
      <edge id="23984" label="1100110110 (1) 1101110110" source="21877" target="21811" cy:directed="1"/>
      <edge id="23983" label="1100110110 (1) 1110110110" source="21877" target="21836" cy:directed="1"/>
      <edge id="23982" label="1100110110 (1) 1000110110" source="21877" target="21881" cy:directed="1"/>
      <edge id="23981" label="1111111010 (1) 1111111000" source="21876" target="22355" cy:directed="1"/>
      <edge id="23980" label="1111111010 (1) 1111111110" source="21876" target="21749" cy:directed="1"/>
      <edge id="23979" label="1111111010 (1) 1111110010" source="21876" target="22144" cy:directed="1"/>
      <edge id="23978" label="1111111010 (1) 1110111010" source="21876" target="21939" cy:directed="1"/>
      <edge id="23977" label="1111111010 (1) 1011111010" source="21876" target="21878" cy:directed="1"/>
      <edge id="23976" label="0100110110 (1) 0100110100" source="21875" target="22312" cy:directed="1"/>
      <edge id="23975" label="0100110110 (1) 0100110010" source="21875" target="22241" cy:directed="1"/>
      <edge id="23974" label="0100110110 (1) 0101110110" source="21875" target="21809" cy:directed="1"/>
      <edge id="23973" label="0100110110 (1) 0110110110" source="21875" target="21835" cy:directed="1"/>
      <edge id="23972" label="0100110110 (1) 0000110110" source="21875" target="21880" cy:directed="1"/>
      <edge id="23971" label="1011001001 (1) 1011001011" source="21874" target="21873" cy:directed="1"/>
      <edge id="23970" label="1011001001 (1) 1011001101" source="21874" target="21872" cy:directed="1"/>
      <edge id="23969" label="1011001001 (1) 1011000001" source="21874" target="22138" cy:directed="1"/>
      <edge id="23968" label="1011001001 (1) 1010001001" source="21874" target="21937" cy:directed="1"/>
      <edge id="23967" label="1011001001 (1) 1001001001" source="21874" target="21976" cy:directed="1"/>
      <edge id="23966" label="1011001001 (1) 1111001001" source="21874" target="21871" cy:directed="1"/>
      <edge id="23965" label="1011001011 (1) 1011001111" source="21873" target="21630" cy:directed="1"/>
      <edge id="23964" label="1011001011 (1) 1011000011" source="21873" target="22137" cy:directed="1"/>
      <edge id="23963" label="1011001011 (1) 1010001011" source="21873" target="21936" cy:directed="1"/>
      <edge id="23962" label="1011001011 (1) 1001001011" source="21873" target="21904" cy:directed="1"/>
      <edge id="23961" label="1011001011 (1) 1111001011" source="21873" target="21863" cy:directed="1"/>
      <edge id="23960" label="1011001101 (1) 1011001111" source="21872" target="21630" cy:directed="1"/>
      <edge id="23959" label="1011001101 (1) 1011000101" source="21872" target="22136" cy:directed="1"/>
      <edge id="23958" label="1011001101 (1) 1010001101" source="21872" target="21935" cy:directed="1"/>
      <edge id="23957" label="1011001101 (1) 1111001101" source="21872" target="21862" cy:directed="1"/>
      <edge id="23956" label="1111001001 (1) 1111001011" source="21871" target="21863" cy:directed="1"/>
      <edge id="23955" label="1111001001 (1) 1111001101" source="21871" target="21862" cy:directed="1"/>
      <edge id="23954" label="1111001001 (1) 1111000001" source="21871" target="22135" cy:directed="1"/>
      <edge id="23953" label="1111001001 (1) 1111101001" source="21871" target="21861" cy:directed="1"/>
      <edge id="23952" label="1111001001 (1) 1110001001" source="21871" target="21934" cy:directed="1"/>
      <edge id="23951" label="1111001001 (1) 1101001001" source="21871" target="21966" cy:directed="1"/>
      <edge id="23950" label="1000000111 (1) 1000100111" source="21870" target="21715" cy:directed="1"/>
      <edge id="23949" label="1000000111 (1) 1001000111" source="21870" target="21810" cy:directed="1"/>
      <edge id="23948" label="1000000111 (1) 1010000111" source="21870" target="21833" cy:directed="1"/>
      <edge id="23947" label="1000000111 (1) 1100000111" source="21870" target="21864" cy:directed="1"/>
      <edge id="23946" label="0011001001 (1) 0011001011" source="21869" target="21868" cy:directed="1"/>
      <edge id="23945" label="0011001001 (1) 0011001101" source="21869" target="21867" cy:directed="1"/>
      <edge id="23944" label="0011001001 (1) 0011000001" source="21869" target="22147" cy:directed="1"/>
      <edge id="23943" label="0011001001 (1) 0010001001" source="21869" target="21933" cy:directed="1"/>
      <edge id="23942" label="0011001001 (1) 0001001001" source="21869" target="21971" cy:directed="1"/>
      <edge id="23941" label="0011001011 (1) 0011001111" source="21868" target="21631" cy:directed="1"/>
      <edge id="23940" label="0011001011 (1) 0011000011" source="21868" target="22146" cy:directed="1"/>
      <edge id="23939" label="0011001011 (1) 0010001011" source="21868" target="21932" cy:directed="1"/>
      <edge id="23938" label="0011001011 (1) 0001001011" source="21868" target="21899" cy:directed="1"/>
      <edge id="23937" label="0011001101 (1) 0011001111" source="21867" target="21631" cy:directed="1"/>
      <edge id="23936" label="0011001101 (1) 0011000101" source="21867" target="22145" cy:directed="1"/>
      <edge id="23935" label="0011001101 (1) 0010001101" source="21867" target="21931" cy:directed="1"/>
      <edge id="23934" label="0111111010 (1) 0111111000" source="21866" target="22354" cy:directed="1"/>
      <edge id="23933" label="0111111010 (1) 0111111110" source="21866" target="21748" cy:directed="1"/>
      <edge id="23932" label="0111111010 (1) 0111110010" source="21866" target="22139" cy:directed="1"/>
      <edge id="23931" label="0111111010 (1) 0110111010" source="21866" target="21938" cy:directed="1"/>
      <edge id="23930" label="0111111010 (1) 0011111010" source="21866" target="21879" cy:directed="1"/>
      <edge id="23929" label="0000000111 (1) 0000100111" source="21865" target="21720" cy:directed="1"/>
      <edge id="23928" label="0000000111 (1) 0001000111" source="21865" target="21808" cy:directed="1"/>
      <edge id="23927" label="0000000111 (1) 0010000111" source="21865" target="21834" cy:directed="1"/>
      <edge id="23926" label="1100000111 (1) 1100100111" source="21864" target="21708" cy:directed="1"/>
      <edge id="23925" label="1100000111 (1) 1101000111" source="21864" target="21807" cy:directed="1"/>
      <edge id="23924" label="1111001011 (1) 1111001111" source="21863" target="21629" cy:directed="1"/>
      <edge id="23923" label="1111001011 (1) 1111000011" source="21863" target="22130" cy:directed="1"/>
      <edge id="23922" label="1111001011 (1) 1111101011" source="21863" target="21611" cy:directed="1"/>
      <edge id="23921" label="1111001011 (1) 1110001011" source="21863" target="21928" cy:directed="1"/>
      <edge id="23920" label="1111001011 (1) 1101001011" source="21863" target="21889" cy:directed="1"/>
      <edge id="23919" label="1111001101 (1) 1111001111" source="21862" target="21629" cy:directed="1"/>
      <edge id="23918" label="1111001101 (1) 1111000101" source="21862" target="22129" cy:directed="1"/>
      <edge id="23917" label="1111001101 (1) 1111101101" source="21862" target="21767" cy:directed="1"/>
      <edge id="23916" label="1111001101 (1) 1110001101" source="21862" target="21927" cy:directed="1"/>
      <edge id="23915" label="1111001101 (1) 1101001101" source="21862" target="21888" cy:directed="1"/>
      <edge id="23914" label="1111101001 (1) 1111101101" source="21861" target="21767" cy:directed="1"/>
      <edge id="23913" label="1111101001 (1) 1111100001" source="21861" target="22128" cy:directed="1"/>
      <edge id="23912" label="1111101001 (1) 1111111001" source="21861" target="21820" cy:directed="1"/>
      <edge id="23911" label="1111101001 (1) 1110101001" source="21861" target="21831" cy:directed="1"/>
      <edge id="23910" label="1001110101 (1) 1001111101" source="21860" target="21672" cy:directed="1"/>
      <edge id="23909" label="1001110101 (1) 1011110101" source="21860" target="21826" cy:directed="1"/>
      <edge id="23908" label="1001111001 (1) 1001111101" source="21859" target="21672" cy:directed="1"/>
      <edge id="23907" label="1001111001 (1) 1001011001" source="21859" target="22005" cy:directed="1"/>
      <edge id="23906" label="1001111001 (1) 1011111001" source="21859" target="21825" cy:directed="1"/>
      <edge id="23905" label="0100000111 (1) 0100100111" source="21858" target="21704" cy:directed="1"/>
      <edge id="23904" label="0100000111 (1) 0101000111" source="21858" target="21806" cy:directed="1"/>
      <edge id="23903" label="0100000111 (1) 0000000111" source="21858" target="21865" cy:directed="1"/>
      <edge id="23902" label="0001110101 (1) 0001111101" source="21857" target="21670" cy:directed="1"/>
      <edge id="23901" label="0001110101 (1) 0011110101" source="21857" target="21823" cy:directed="1"/>
      <edge id="23900" label="0001111001 (1) 0001111101" source="21856" target="21670" cy:directed="1"/>
      <edge id="23899" label="0001111001 (1) 0001011001" source="21856" target="22002" cy:directed="1"/>
      <edge id="23898" label="0001111001 (1) 0011111001" source="21856" target="21822" cy:directed="1"/>
      <edge id="23897" label="0111001001 (1) 0111001011" source="21855" target="21854" cy:directed="1"/>
      <edge id="23896" label="0111001001 (1) 0111001101" source="21855" target="21853" cy:directed="1"/>
      <edge id="23895" label="0111001001 (1) 0111000001" source="21855" target="22127" cy:directed="1"/>
      <edge id="23894" label="0111001001 (1) 0111101001" source="21855" target="21852" cy:directed="1"/>
      <edge id="23893" label="0111001001 (1) 0110001001" source="21855" target="21926" cy:directed="1"/>
      <edge id="23892" label="0111001001 (1) 0101001001" source="21855" target="21962" cy:directed="1"/>
      <edge id="23891" label="0111001001 (1) 0011001001" source="21855" target="21869" cy:directed="1"/>
      <edge id="23890" label="0111001011 (1) 0111001111" source="21854" target="21628" cy:directed="1"/>
      <edge id="23889" label="0111001011 (1) 0111000011" source="21854" target="22126" cy:directed="1"/>
      <edge id="23888" label="0111001011 (1) 0111101011" source="21854" target="21608" cy:directed="1"/>
      <edge id="23887" label="0111001011 (1) 0110001011" source="21854" target="21925" cy:directed="1"/>
      <edge id="23886" label="0111001011 (1) 0101001011" source="21854" target="21884" cy:directed="1"/>
      <edge id="23885" label="0111001011 (1) 0011001011" source="21854" target="21868" cy:directed="1"/>
      <edge id="23884" label="0111001101 (1) 0111001111" source="21853" target="21628" cy:directed="1"/>
      <edge id="23883" label="0111001101 (1) 0111000101" source="21853" target="22125" cy:directed="1"/>
      <edge id="23882" label="0111001101 (1) 0111101101" source="21853" target="21764" cy:directed="1"/>
      <edge id="23881" label="0111001101 (1) 0110001101" source="21853" target="21924" cy:directed="1"/>
      <edge id="23880" label="0111001101 (1) 0101001101" source="21853" target="21883" cy:directed="1"/>
      <edge id="23879" label="0111001101 (1) 0011001101" source="21853" target="21867" cy:directed="1"/>
      <edge id="23878" label="0111101001 (1) 0111101101" source="21852" target="21764" cy:directed="1"/>
      <edge id="23877" label="0111101001 (1) 0111100001" source="21852" target="22124" cy:directed="1"/>
      <edge id="23876" label="0111101001 (1) 0111111001" source="21852" target="21818" cy:directed="1"/>
      <edge id="23875" label="0111101001 (1) 0110101001" source="21852" target="21828" cy:directed="1"/>
      <edge id="23874" label="0111101001 (1) 0011101001" source="21852" target="21794" cy:directed="1"/>
      <edge id="23873" label="1101110101 (1) 1101111101" source="21851" target="21669" cy:directed="1"/>
      <edge id="23872" label="1101110101 (1) 1111110101" source="21851" target="21821" cy:directed="1"/>
      <edge id="23871" label="1101110101 (1) 1001110101" source="21851" target="21860" cy:directed="1"/>
      <edge id="23870" label="1101111001 (1) 1101111101" source="21850" target="21669" cy:directed="1"/>
      <edge id="23869" label="1101111001 (1) 1111111001" source="21850" target="21820" cy:directed="1"/>
      <edge id="23868" label="1101111001 (1) 1001111001" source="21850" target="21859" cy:directed="1"/>
      <edge id="23867" label="0101110101 (1) 0101111101" source="21849" target="21667" cy:directed="1"/>
      <edge id="23866" label="0101110101 (1) 0111110101" source="21849" target="21819" cy:directed="1"/>
      <edge id="23865" label="0101110101 (1) 0001110101" source="21849" target="21857" cy:directed="1"/>
      <edge id="23864" label="0101111001 (1) 0101111101" source="21848" target="21667" cy:directed="1"/>
      <edge id="23863" label="0101111001 (1) 0111111001" source="21848" target="21818" cy:directed="1"/>
      <edge id="23862" label="0101111001 (1) 0001111001" source="21848" target="21856" cy:directed="1"/>
      <edge id="23861" label="1010110110 (1) 1010110100" source="21847" target="22311" cy:directed="1"/>
      <edge id="23860" label="1010110110 (1) 1010110010" source="21847" target="22217" cy:directed="1"/>
      <edge id="23859" label="0010110110 (1) 0010110100" source="21846" target="22310" cy:directed="1"/>
      <edge id="23858" label="0010110110 (1) 0010110010" source="21846" target="22216" cy:directed="1"/>
      <edge id="23857" label="0000101001 (1) 0000101101" source="21845" target="21844" cy:directed="1"/>
      <edge id="23856" label="0000101001 (1) 0000100001" source="21845" target="22123" cy:directed="1"/>
      <edge id="23855" label="0000101001 (1) 0000111001" source="21845" target="21922" cy:directed="1"/>
      <edge id="23854" label="0000101001 (1) 0000001001" source="21845" target="21974" cy:directed="1"/>
      <edge id="23853" label="0000101001 (1) 0001101001" source="21845" target="21843" cy:directed="1"/>
      <edge id="23852" label="0000101001 (1) 0010101001" source="21845" target="21842" cy:directed="1"/>
      <edge id="23851" label="0000101101 (1) 0000100101" source="21844" target="22122" cy:directed="1"/>
      <edge id="23850" label="0000101101 (1) 0000111101" source="21844" target="21733" cy:directed="1"/>
      <edge id="23849" label="0000101101 (1) 0000001101" source="21844" target="21972" cy:directed="1"/>
      <edge id="23848" label="0000101101 (1) 0001101101" source="21844" target="21795" cy:directed="1"/>
      <edge id="23847" label="0000101101 (1) 0010101101" source="21844" target="21817" cy:directed="1"/>
      <edge id="23846" label="0001101001 (1) 0001101101" source="21843" target="21795" cy:directed="1"/>
      <edge id="23845" label="0001101001 (1) 0001100001" source="21843" target="22120" cy:directed="1"/>
      <edge id="23844" label="0001101001 (1) 0001111001" source="21843" target="21856" cy:directed="1"/>
      <edge id="23843" label="0001101001 (1) 0001001001" source="21843" target="21971" cy:directed="1"/>
      <edge id="23842" label="0001101001 (1) 0011101001" source="21843" target="21794" cy:directed="1"/>
      <edge id="23841" label="0010101001 (1) 0010101101" source="21842" target="21817" cy:directed="1"/>
      <edge id="23840" label="0010101001 (1) 0010100001" source="21842" target="22119" cy:directed="1"/>
      <edge id="23839" label="0010101001 (1) 0010111001" source="21842" target="21894" cy:directed="1"/>
      <edge id="23838" label="0010101001 (1) 0010001001" source="21842" target="21933" cy:directed="1"/>
      <edge id="23837" label="1000101001 (1) 1000101101" source="21841" target="21840" cy:directed="1"/>
      <edge id="23836" label="1000101001 (1) 1000100001" source="21841" target="22118" cy:directed="1"/>
      <edge id="23835" label="1000101001 (1) 1000111001" source="21841" target="21920" cy:directed="1"/>
      <edge id="23834" label="1000101001 (1) 1000001001" source="21841" target="21979" cy:directed="1"/>
      <edge id="23833" label="1000101001 (1) 1001101001" source="21841" target="21839" cy:directed="1"/>
      <edge id="23832" label="1000101001 (1) 1010101001" source="21841" target="21838" cy:directed="1"/>
      <edge id="23831" label="1000101001 (1) 1100101001" source="21841" target="21837" cy:directed="1"/>
      <edge id="23830" label="1000101101 (1) 1000100101" source="21840" target="22117" cy:directed="1"/>
      <edge id="23829" label="1000101101 (1) 1000111101" source="21840" target="21732" cy:directed="1"/>
      <edge id="23828" label="1000101101 (1) 1000001101" source="21840" target="21977" cy:directed="1"/>
      <edge id="23827" label="1000101101 (1) 1001101101" source="21840" target="21793" cy:directed="1"/>
      <edge id="23826" label="1000101101 (1) 1010101101" source="21840" target="21816" cy:directed="1"/>
      <edge id="23825" label="1000101101 (1) 1100101101" source="21840" target="21832" cy:directed="1"/>
      <edge id="23824" label="1001101001 (1) 1001101101" source="21839" target="21793" cy:directed="1"/>
      <edge id="23823" label="1001101001 (1) 1001100001" source="21839" target="22115" cy:directed="1"/>
      <edge id="23822" label="1001101001 (1) 1001111001" source="21839" target="21859" cy:directed="1"/>
      <edge id="23821" label="1001101001 (1) 1001001001" source="21839" target="21976" cy:directed="1"/>
      <edge id="23820" label="1001101001 (1) 1011101001" source="21839" target="21792" cy:directed="1"/>
      <edge id="23819" label="1001101001 (1) 1101101001" source="21839" target="21887" cy:directed="1"/>
      <edge id="23818" label="1010101001 (1) 1010101101" source="21838" target="21816" cy:directed="1"/>
      <edge id="23817" label="1010101001 (1) 1010100001" source="21838" target="22114" cy:directed="1"/>
      <edge id="23816" label="1010101001 (1) 1010111001" source="21838" target="21896" cy:directed="1"/>
      <edge id="23815" label="1010101001 (1) 1010001001" source="21838" target="21937" cy:directed="1"/>
      <edge id="23814" label="1010101001 (1) 1110101001" source="21838" target="21831" cy:directed="1"/>
      <edge id="23813" label="1100101001 (1) 1100101101" source="21837" target="21832" cy:directed="1"/>
      <edge id="23812" label="1100101001 (1) 1100100001" source="21837" target="22113" cy:directed="1"/>
      <edge id="23811" label="1100101001 (1) 1100111001" source="21837" target="21914" cy:directed="1"/>
      <edge id="23810" label="1100101001 (1) 1100001001" source="21837" target="21975" cy:directed="1"/>
      <edge id="23809" label="1100101001 (1) 1101101001" source="21837" target="21887" cy:directed="1"/>
      <edge id="23808" label="1100101001 (1) 1110101001" source="21837" target="21831" cy:directed="1"/>
      <edge id="23807" label="1110110110 (1) 1110110100" source="21836" target="22309" cy:directed="1"/>
      <edge id="23806" label="1110110110 (1) 1110110010" source="21836" target="22213" cy:directed="1"/>
      <edge id="23805" label="1110110110 (1) 1010110110" source="21836" target="21847" cy:directed="1"/>
      <edge id="23804" label="0110110110 (1) 0110110100" source="21835" target="22304" cy:directed="1"/>
      <edge id="23803" label="0110110110 (1) 0110110010" source="21835" target="22203" cy:directed="1"/>
      <edge id="23802" label="0110110110 (1) 0010110110" source="21835" target="21846" cy:directed="1"/>
      <edge id="23801" label="0010000111 (1) 0010100111" source="21834" target="21686" cy:directed="1"/>
      <edge id="23800" label="1010000111 (1) 1010100111" source="21833" target="21684" cy:directed="1"/>
      <edge id="23799" label="1010000111 (1) 1110000111" source="21833" target="21827" cy:directed="1"/>
      <edge id="23798" label="1100101101 (1) 1100100101" source="21832" target="22109" cy:directed="1"/>
      <edge id="23797" label="1100101101 (1) 1100111101" source="21832" target="21728" cy:directed="1"/>
      <edge id="23796" label="1100101101 (1) 1100001101" source="21832" target="21967" cy:directed="1"/>
      <edge id="23795" label="1100101101 (1) 1101101101" source="21832" target="21785" cy:directed="1"/>
      <edge id="23794" label="1100101101 (1) 1110101101" source="21832" target="21813" cy:directed="1"/>
      <edge id="23793" label="1110101001 (1) 1110101101" source="21831" target="21813" cy:directed="1"/>
      <edge id="23792" label="1110101001 (1) 1110100001" source="21831" target="22107" cy:directed="1"/>
      <edge id="23791" label="1110101001 (1) 1110111001" source="21831" target="21890" cy:directed="1"/>
      <edge id="23790" label="1110101001 (1) 1110001001" source="21831" target="21934" cy:directed="1"/>
      <edge id="23789" label="0100101001 (1) 0100101101" source="21830" target="21829" cy:directed="1"/>
      <edge id="23788" label="0100101001 (1) 0100100001" source="21830" target="22106" cy:directed="1"/>
      <edge id="23787" label="0100101001 (1) 0100111001" source="21830" target="21912" cy:directed="1"/>
      <edge id="23786" label="0100101001 (1) 0100001001" source="21830" target="21965" cy:directed="1"/>
      <edge id="23785" label="0100101001 (1) 0101101001" source="21830" target="21882" cy:directed="1"/>
      <edge id="23784" label="0100101001 (1) 0110101001" source="21830" target="21828" cy:directed="1"/>
      <edge id="23783" label="0100101001 (1) 0000101001" source="21830" target="21845" cy:directed="1"/>
      <edge id="23782" label="0100101101 (1) 0100100101" source="21829" target="22105" cy:directed="1"/>
      <edge id="23781" label="0100101101 (1) 0100111101" source="21829" target="21729" cy:directed="1"/>
      <edge id="23780" label="0100101101 (1) 0100001101" source="21829" target="21963" cy:directed="1"/>
      <edge id="23779" label="0100101101 (1) 0101101101" source="21829" target="21784" cy:directed="1"/>
      <edge id="23778" label="0100101101 (1) 0110101101" source="21829" target="21812" cy:directed="1"/>
      <edge id="23777" label="0100101101 (1) 0000101101" source="21829" target="21844" cy:directed="1"/>
      <edge id="23776" label="0110101001 (1) 0110101101" source="21828" target="21812" cy:directed="1"/>
      <edge id="23775" label="0110101001 (1) 0110100001" source="21828" target="22103" cy:directed="1"/>
      <edge id="23774" label="0110101001 (1) 0110111001" source="21828" target="21885" cy:directed="1"/>
      <edge id="23773" label="0110101001 (1) 0110001001" source="21828" target="21926" cy:directed="1"/>
      <edge id="23772" label="0110101001 (1) 0010101001" source="21828" target="21842" cy:directed="1"/>
      <edge id="23771" label="1110000111 (1) 1110100111" source="21827" target="21677" cy:directed="1"/>
      <edge id="23770" label="1110000111 (1) 1100000111" source="21827" target="21864" cy:directed="1"/>
      <edge id="23769" label="1011110101 (1) 1011111101" source="21826" target="21652" cy:directed="1"/>
      <edge id="23768" label="1011110101 (1) 1010110101" source="21826" target="21897" cy:directed="1"/>
      <edge id="23767" label="1011111001 (1) 1011111101" source="21825" target="21652" cy:directed="1"/>
      <edge id="23766" label="1011111001 (1) 1011011001" source="21825" target="21956" cy:directed="1"/>
      <edge id="23765" label="1011111001 (1) 1010111001" source="21825" target="21896" cy:directed="1"/>
      <edge id="23764" label="0110000111 (1) 0110100111" source="21824" target="21675" cy:directed="1"/>
      <edge id="23763" label="0110000111 (1) 0100000111" source="21824" target="21858" cy:directed="1"/>
      <edge id="23762" label="0110000111 (1) 0010000111" source="21824" target="21834" cy:directed="1"/>
      <edge id="23761" label="0011110101 (1) 0011111101" source="21823" target="21648" cy:directed="1"/>
      <edge id="23760" label="0011110101 (1) 0010110101" source="21823" target="21895" cy:directed="1"/>
      <edge id="23759" label="0011111001 (1) 0011111101" source="21822" target="21648" cy:directed="1"/>
      <edge id="23758" label="0011111001 (1) 0011011001" source="21822" target="21952" cy:directed="1"/>
      <edge id="23757" label="0011111001 (1) 0010111001" source="21822" target="21894" cy:directed="1"/>
      <edge id="23756" label="1111110101 (1) 1111111101" source="21821" target="21647" cy:directed="1"/>
      <edge id="23755" label="1111110101 (1) 1110110101" source="21821" target="21891" cy:directed="1"/>
      <edge id="23754" label="1111110101 (1) 1011110101" source="21821" target="21826" cy:directed="1"/>
      <edge id="23753" label="1111111001 (1) 1111111101" source="21820" target="21647" cy:directed="1"/>
      <edge id="23752" label="1111111001 (1) 1110111001" source="21820" target="21890" cy:directed="1"/>
      <edge id="23751" label="1111111001 (1) 1011111001" source="21820" target="21825" cy:directed="1"/>
      <edge id="23750" label="0111110101 (1) 0111111101" source="21819" target="21646" cy:directed="1"/>
      <edge id="23749" label="0111110101 (1) 0110110101" source="21819" target="21886" cy:directed="1"/>
      <edge id="23748" label="0111110101 (1) 0011110101" source="21819" target="21823" cy:directed="1"/>
      <edge id="23747" label="0111111001 (1) 0111111101" source="21818" target="21646" cy:directed="1"/>
      <edge id="23746" label="0111111001 (1) 0110111001" source="21818" target="21885" cy:directed="1"/>
      <edge id="23745" label="0111111001 (1) 0011111001" source="21818" target="21822" cy:directed="1"/>
      <edge id="23744" label="0010101101 (1) 0010100101" source="21817" target="22090" cy:directed="1"/>
      <edge id="23743" label="0010101101 (1) 0010111101" source="21817" target="21709" cy:directed="1"/>
      <edge id="23742" label="0010101101 (1) 0010001101" source="21817" target="21931" cy:directed="1"/>
      <edge id="23741" label="1010101101 (1) 1010100101" source="21816" target="22088" cy:directed="1"/>
      <edge id="23740" label="1010101101 (1) 1010111101" source="21816" target="21710" cy:directed="1"/>
      <edge id="23739" label="1010101101 (1) 1010001101" source="21816" target="21935" cy:directed="1"/>
      <edge id="23738" label="1010101101 (1) 1110101101" source="21816" target="21813" cy:directed="1"/>
      <edge id="23737" label="1001110110 (1) 1001110100" source="21815" target="22298" cy:directed="1"/>
      <edge id="23736" label="1001110110 (1) 1001110010" source="21815" target="22173" cy:directed="1"/>
      <edge id="23735" label="1001110110 (1) 1011110110" source="21815" target="21801" cy:directed="1"/>
      <edge id="23734" label="0001110110 (1) 0001110100" source="21814" target="22294" cy:directed="1"/>
      <edge id="23733" label="0001110110 (1) 0001110010" source="21814" target="22170" cy:directed="1"/>
      <edge id="23732" label="0001110110 (1) 0011110110" source="21814" target="21800" cy:directed="1"/>
      <edge id="23731" label="1110101101 (1) 1110100101" source="21813" target="22083" cy:directed="1"/>
      <edge id="23730" label="1110101101 (1) 1110111101" source="21813" target="21699" cy:directed="1"/>
      <edge id="23729" label="1110101101 (1) 1110001101" source="21813" target="21927" cy:directed="1"/>
      <edge id="23728" label="0110101101 (1) 0110100101" source="21812" target="22081" cy:directed="1"/>
      <edge id="23727" label="0110101101 (1) 0110111101" source="21812" target="21698" cy:directed="1"/>
      <edge id="23726" label="0110101101 (1) 0110001101" source="21812" target="21924" cy:directed="1"/>
      <edge id="23725" label="0110101101 (1) 0010101101" source="21812" target="21817" cy:directed="1"/>
      <edge id="23724" label="1101110110 (1) 1101110100" source="21811" target="22283" cy:directed="1"/>
      <edge id="23723" label="1101110110 (1) 1101110010" source="21811" target="22167" cy:directed="1"/>
      <edge id="23722" label="1101110110 (1) 1111110110" source="21811" target="21791" cy:directed="1"/>
      <edge id="23721" label="1101110110 (1) 1001110110" source="21811" target="21815" cy:directed="1"/>
      <edge id="23720" label="1001000111 (1) 1001100111" source="21810" target="21658" cy:directed="1"/>
      <edge id="23719" label="1001000111 (1) 1011000111" source="21810" target="21788" cy:directed="1"/>
      <edge id="23718" label="1001000111 (1) 1101000111" source="21810" target="21807" cy:directed="1"/>
      <edge id="23717" label="0101110110 (1) 0101110100" source="21809" target="22282" cy:directed="1"/>
      <edge id="23716" label="0101110110 (1) 0101110010" source="21809" target="22161" cy:directed="1"/>
      <edge id="23715" label="0101110110 (1) 0111110110" source="21809" target="21790" cy:directed="1"/>
      <edge id="23714" label="0101110110 (1) 0001110110" source="21809" target="21814" cy:directed="1"/>
      <edge id="23713" label="0001000111 (1) 0001100111" source="21808" target="21661" cy:directed="1"/>
      <edge id="23712" label="0001000111 (1) 0011000111" source="21808" target="21789" cy:directed="1"/>
      <edge id="23711" label="1101000111 (1) 1101100111" source="21807" target="21654" cy:directed="1"/>
      <edge id="23710" label="0101000111 (1) 0101100111" source="21806" target="21650" cy:directed="1"/>
      <edge id="23709" label="0101000111 (1) 0001000111" source="21806" target="21808" cy:directed="1"/>
      <edge id="23708" label="0000111110 (1) 0000111100" source="21805" target="22270" cy:directed="1"/>
      <edge id="23707" label="0000111110 (1) 0000110110" source="21805" target="21880" cy:directed="1"/>
      <edge id="23706" label="0000111110 (1) 0000011110" source="21805" target="22046" cy:directed="1"/>
      <edge id="23705" label="0000111110 (1) 0001111110" source="21805" target="21762" cy:directed="1"/>
      <edge id="23704" label="0000111110 (1) 0010111110" source="21805" target="21778" cy:directed="1"/>
      <edge id="23703" label="1000111110 (1) 1000111100" source="21804" target="22271" cy:directed="1"/>
      <edge id="23702" label="1000111110 (1) 1000110110" source="21804" target="21881" cy:directed="1"/>
      <edge id="23701" label="1000111110 (1) 1000011110" source="21804" target="22049" cy:directed="1"/>
      <edge id="23700" label="1000111110 (1) 1001111110" source="21804" target="21763" cy:directed="1"/>
      <edge id="23699" label="1000111110 (1) 1010111110" source="21804" target="21779" cy:directed="1"/>
      <edge id="23698" label="0000011011 (1) 0000011111" source="21803" target="21621" cy:directed="1"/>
      <edge id="23697" label="0000011011 (1) 0000010011" source="21803" target="22073" cy:directed="1"/>
      <edge id="23696" label="0000011011 (1) 0000001011" source="21803" target="21973" cy:directed="1"/>
      <edge id="23695" label="0000011011 (1) 0001011011" source="21803" target="21757" cy:directed="1"/>
      <edge id="23694" label="0000011101 (1) 0000011111" source="21802" target="21621" cy:directed="1"/>
      <edge id="23693" label="0000011101 (1) 0000001101" source="21802" target="21972" cy:directed="1"/>
      <edge id="23692" label="0000011101 (1) 0001011101" source="21802" target="21756" cy:directed="1"/>
      <edge id="23691" label="0000011101 (1) 0010011101" source="21802" target="21771" cy:directed="1"/>
      <edge id="23690" label="1011110110 (1) 1011110100" source="21801" target="22267" cy:directed="1"/>
      <edge id="23689" label="1011110110 (1) 1011110010" source="21801" target="22149" cy:directed="1"/>
      <edge id="23688" label="1011110110 (1) 1010110110" source="21801" target="21847" cy:directed="1"/>
      <edge id="23687" label="0011110110 (1) 0011110100" source="21800" target="22265" cy:directed="1"/>
      <edge id="23686" label="0011110110 (1) 0011110010" source="21800" target="22148" cy:directed="1"/>
      <edge id="23685" label="0011110110 (1) 0010110110" source="21800" target="21846" cy:directed="1"/>
      <edge id="23684" label="1100111110 (1) 1100111100" source="21799" target="22269" cy:directed="1"/>
      <edge id="23683" label="1100111110 (1) 1100110110" source="21799" target="21877" cy:directed="1"/>
      <edge id="23682" label="1100111110 (1) 1100011110" source="21799" target="22031" cy:directed="1"/>
      <edge id="23681" label="1100111110 (1) 1101111110" source="21799" target="21761" cy:directed="1"/>
      <edge id="23680" label="1100111110 (1) 1110111110" source="21799" target="21776" cy:directed="1"/>
      <edge id="23679" label="1100111110 (1) 1000111110" source="21799" target="21804" cy:directed="1"/>
      <edge id="23678" label="0100111110 (1) 0100111100" source="21798" target="22266" cy:directed="1"/>
      <edge id="23677" label="0100111110 (1) 0100110110" source="21798" target="21875" cy:directed="1"/>
      <edge id="23676" label="0100111110 (1) 0100011110" source="21798" target="22030" cy:directed="1"/>
      <edge id="23675" label="0100111110 (1) 0101111110" source="21798" target="21760" cy:directed="1"/>
      <edge id="23674" label="0100111110 (1) 0110111110" source="21798" target="21777" cy:directed="1"/>
      <edge id="23673" label="0100111110 (1) 0000111110" source="21798" target="21805" cy:directed="1"/>
      <edge id="23672" label="1000011011 (1) 1000011111" source="21797" target="21620" cy:directed="1"/>
      <edge id="23671" label="1000011011 (1) 1000010011" source="21797" target="22078" cy:directed="1"/>
      <edge id="23670" label="1000011011 (1) 1000001011" source="21797" target="21978" cy:directed="1"/>
      <edge id="23669" label="1000011011 (1) 1001011011" source="21797" target="21759" cy:directed="1"/>
      <edge id="23668" label="1000011101 (1) 1000011111" source="21796" target="21620" cy:directed="1"/>
      <edge id="23667" label="1000011101 (1) 1000001101" source="21796" target="21977" cy:directed="1"/>
      <edge id="23666" label="1000011101 (1) 1001011101" source="21796" target="21758" cy:directed="1"/>
      <edge id="23665" label="1000011101 (1) 1010011101" source="21796" target="21773" cy:directed="1"/>
      <edge id="23664" label="0001101101 (1) 0001100101" source="21795" target="22069" cy:directed="1"/>
      <edge id="23663" label="0001101101 (1) 0001111101" source="21795" target="21670" cy:directed="1"/>
      <edge id="23662" label="0001101101 (1) 0001001101" source="21795" target="21898" cy:directed="1"/>
      <edge id="23661" label="0001101101 (1) 0011101101" source="21795" target="21770" cy:directed="1"/>
      <edge id="23660" label="0011101001 (1) 0011101101" source="21794" target="21770" cy:directed="1"/>
      <edge id="23659" label="0011101001 (1) 0011100001" source="21794" target="22067" cy:directed="1"/>
      <edge id="23658" label="0011101001 (1) 0011111001" source="21794" target="21822" cy:directed="1"/>
      <edge id="23657" label="0011101001 (1) 0011001001" source="21794" target="21869" cy:directed="1"/>
      <edge id="23656" label="0011101001 (1) 0010101001" source="21794" target="21842" cy:directed="1"/>
      <edge id="23655" label="1001101101 (1) 1001100101" source="21793" target="22066" cy:directed="1"/>
      <edge id="23654" label="1001101101 (1) 1001111101" source="21793" target="21672" cy:directed="1"/>
      <edge id="23653" label="1001101101 (1) 1001001101" source="21793" target="21903" cy:directed="1"/>
      <edge id="23652" label="1001101101 (1) 1011101101" source="21793" target="21775" cy:directed="1"/>
      <edge id="23651" label="1001101101 (1) 1101101101" source="21793" target="21785" cy:directed="1"/>
      <edge id="23650" label="1011101001 (1) 1011101101" source="21792" target="21775" cy:directed="1"/>
      <edge id="23649" label="1011101001 (1) 1011100001" source="21792" target="22064" cy:directed="1"/>
      <edge id="23648" label="1011101001 (1) 1011111001" source="21792" target="21825" cy:directed="1"/>
      <edge id="23647" label="1011101001 (1) 1011001001" source="21792" target="21874" cy:directed="1"/>
      <edge id="23646" label="1011101001 (1) 1010101001" source="21792" target="21838" cy:directed="1"/>
      <edge id="23645" label="1011101001 (1) 1111101001" source="21792" target="21861" cy:directed="1"/>
      <edge id="23644" label="1111110110 (1) 1111110100" source="21791" target="22261" cy:directed="1"/>
      <edge id="23643" label="1111110110 (1) 1111110010" source="21791" target="22144" cy:directed="1"/>
      <edge id="23642" label="1111110110 (1) 1110110110" source="21791" target="21836" cy:directed="1"/>
      <edge id="23641" label="1111110110 (1) 1011110110" source="21791" target="21801" cy:directed="1"/>
      <edge id="23640" label="0111110110 (1) 0111110100" source="21790" target="22260" cy:directed="1"/>
      <edge id="23639" label="0111110110 (1) 0111110010" source="21790" target="22139" cy:directed="1"/>
      <edge id="23638" label="0111110110 (1) 0110110110" source="21790" target="21835" cy:directed="1"/>
      <edge id="23637" label="0111110110 (1) 0011110110" source="21790" target="21800" cy:directed="1"/>
      <edge id="23636" label="0011000111 (1) 0011100111" source="21789" target="21643" cy:directed="1"/>
      <edge id="23635" label="0011000111 (1) 0010000111" source="21789" target="21834" cy:directed="1"/>
      <edge id="23634" label="1011000111 (1) 1011100111" source="21788" target="21641" cy:directed="1"/>
      <edge id="23633" label="1011000111 (1) 1010000111" source="21788" target="21833" cy:directed="1"/>
      <edge id="23632" label="1011000111 (1) 1111000111" source="21788" target="21781" cy:directed="1"/>
      <edge id="23631" label="1100011011 (1) 1100011111" source="21787" target="21615" cy:directed="1"/>
      <edge id="23630" label="1100011011 (1) 1100010011" source="21787" target="22060" cy:directed="1"/>
      <edge id="23629" label="1100011011 (1) 1100001011" source="21787" target="21968" cy:directed="1"/>
      <edge id="23628" label="1100011011 (1) 1101011011" source="21787" target="21755" cy:directed="1"/>
      <edge id="23627" label="1100011011 (1) 1000011011" source="21787" target="21797" cy:directed="1"/>
      <edge id="23626" label="1100011101 (1) 1100011111" source="21786" target="21615" cy:directed="1"/>
      <edge id="23625" label="1100011101 (1) 1100001101" source="21786" target="21967" cy:directed="1"/>
      <edge id="23624" label="1100011101 (1) 1101011101" source="21786" target="21754" cy:directed="1"/>
      <edge id="23623" label="1100011101 (1) 1000011101" source="21786" target="21796" cy:directed="1"/>
      <edge id="23622" label="1101101101 (1) 1101100101" source="21785" target="22063" cy:directed="1"/>
      <edge id="23621" label="1101101101 (1) 1101111101" source="21785" target="21669" cy:directed="1"/>
      <edge id="23620" label="1101101101 (1) 1111101101" source="21785" target="21767" cy:directed="1"/>
      <edge id="23619" label="0101101101 (1) 0101100101" source="21784" target="22056" cy:directed="1"/>
      <edge id="23618" label="0101101101 (1) 0101111101" source="21784" target="21667" cy:directed="1"/>
      <edge id="23617" label="0101101101 (1) 0111101101" source="21784" target="21764" cy:directed="1"/>
      <edge id="23616" label="0101101101 (1) 0001101101" source="21784" target="21795" cy:directed="1"/>
      <edge id="23615" label="0100011011 (1) 0100011111" source="21783" target="21614" cy:directed="1"/>
      <edge id="23614" label="0100011011 (1) 0100010011" source="21783" target="22053" cy:directed="1"/>
      <edge id="23613" label="0100011011 (1) 0100001011" source="21783" target="21964" cy:directed="1"/>
      <edge id="23612" label="0100011011 (1) 0101011011" source="21783" target="21753" cy:directed="1"/>
      <edge id="23611" label="0100011011 (1) 0000011011" source="21783" target="21803" cy:directed="1"/>
      <edge id="23610" label="0100011101 (1) 0100011111" source="21782" target="21614" cy:directed="1"/>
      <edge id="23609" label="0100011101 (1) 0100001101" source="21782" target="21963" cy:directed="1"/>
      <edge id="23608" label="0100011101 (1) 0101011101" source="21782" target="21752" cy:directed="1"/>
      <edge id="23607" label="0100011101 (1) 0000011101" source="21782" target="21802" cy:directed="1"/>
      <edge id="23606" label="1111000111 (1) 1111100111" source="21781" target="21637" cy:directed="1"/>
      <edge id="23605" label="1111000111 (1) 1110000111" source="21781" target="21827" cy:directed="1"/>
      <edge id="23604" label="1111000111 (1) 1101000111" source="21781" target="21807" cy:directed="1"/>
      <edge id="23603" label="0111000111 (1) 0111100111" source="21780" target="21635" cy:directed="1"/>
      <edge id="23602" label="0111000111 (1) 0110000111" source="21780" target="21824" cy:directed="1"/>
      <edge id="23601" label="0111000111 (1) 0101000111" source="21780" target="21806" cy:directed="1"/>
      <edge id="23600" label="0111000111 (1) 0011000111" source="21780" target="21789" cy:directed="1"/>
      <edge id="23599" label="1010111110 (1) 1010111100" source="21779" target="22246" cy:directed="1"/>
      <edge id="23598" label="1010111110 (1) 1010110110" source="21779" target="21847" cy:directed="1"/>
      <edge id="23597" label="1010111110 (1) 1010011110" source="21779" target="22014" cy:directed="1"/>
      <edge id="23596" label="0010111110 (1) 0010111100" source="21778" target="22243" cy:directed="1"/>
      <edge id="23595" label="0010111110 (1) 0010110110" source="21778" target="21846" cy:directed="1"/>
      <edge id="23594" label="0010111110 (1) 0010011110" source="21778" target="22011" cy:directed="1"/>
      <edge id="23593" label="0110111110 (1) 0110111100" source="21777" target="22229" cy:directed="1"/>
      <edge id="23592" label="0110111110 (1) 0110110110" source="21777" target="21835" cy:directed="1"/>
      <edge id="23591" label="0110111110 (1) 0110011110" source="21777" target="22008" cy:directed="1"/>
      <edge id="23590" label="0110111110 (1) 0010111110" source="21777" target="21778" cy:directed="1"/>
      <edge id="23589" label="1110111110 (1) 1110111100" source="21776" target="22230" cy:directed="1"/>
      <edge id="23588" label="1110111110 (1) 1110110110" source="21776" target="21836" cy:directed="1"/>
      <edge id="23587" label="1110111110 (1) 1110011110" source="21776" target="22009" cy:directed="1"/>
      <edge id="23586" label="1110111110 (1) 1010111110" source="21776" target="21779" cy:directed="1"/>
      <edge id="23585" label="1011101101 (1) 1011100101" source="21775" target="22035" cy:directed="1"/>
      <edge id="23584" label="1011101101 (1) 1011111101" source="21775" target="21652" cy:directed="1"/>
      <edge id="23583" label="1011101101 (1) 1011001101" source="21775" target="21872" cy:directed="1"/>
      <edge id="23582" label="1011101101 (1) 1010101101" source="21775" target="21816" cy:directed="1"/>
      <edge id="23581" label="1011101101 (1) 1111101101" source="21775" target="21767" cy:directed="1"/>
      <edge id="23580" label="1010011011 (1) 1010011111" source="21774" target="21612" cy:directed="1"/>
      <edge id="23579" label="1010011011 (1) 1010010011" source="21774" target="22042" cy:directed="1"/>
      <edge id="23578" label="1010011011 (1) 1010001011" source="21774" target="21936" cy:directed="1"/>
      <edge id="23577" label="1010011011 (1) 1000011011" source="21774" target="21797" cy:directed="1"/>
      <edge id="23576" label="1010011101 (1) 1010011111" source="21773" target="21612" cy:directed="1"/>
      <edge id="23575" label="1010011101 (1) 1010001101" source="21773" target="21935" cy:directed="1"/>
      <edge id="23574" label="0010011011 (1) 0010011111" source="21772" target="21613" cy:directed="1"/>
      <edge id="23573" label="0010011011 (1) 0010010011" source="21772" target="22038" cy:directed="1"/>
      <edge id="23572" label="0010011011 (1) 0010001011" source="21772" target="21932" cy:directed="1"/>
      <edge id="23571" label="0010011011 (1) 0000011011" source="21772" target="21803" cy:directed="1"/>
      <edge id="23570" label="0010011101 (1) 0010011111" source="21771" target="21613" cy:directed="1"/>
      <edge id="23569" label="0010011101 (1) 0010001101" source="21771" target="21931" cy:directed="1"/>
      <edge id="23568" label="0011101101 (1) 0011100101" source="21770" target="22033" cy:directed="1"/>
      <edge id="23567" label="0011101101 (1) 0011111101" source="21770" target="21648" cy:directed="1"/>
      <edge id="23566" label="0011101101 (1) 0011001101" source="21770" target="21867" cy:directed="1"/>
      <edge id="23565" label="0011101101 (1) 0010101101" source="21770" target="21817" cy:directed="1"/>
      <edge id="23564" label="1110011011 (1) 1110011111" source="21769" target="21607" cy:directed="1"/>
      <edge id="23563" label="1110011011 (1) 1110010011" source="21769" target="22028" cy:directed="1"/>
      <edge id="23562" label="1110011011 (1) 1110001011" source="21769" target="21928" cy:directed="1"/>
      <edge id="23561" label="1110011011 (1) 1100011011" source="21769" target="21787" cy:directed="1"/>
      <edge id="23560" label="1110011011 (1) 1010011011" source="21769" target="21774" cy:directed="1"/>
      <edge id="23559" label="1110011101 (1) 1110011111" source="21768" target="21607" cy:directed="1"/>
      <edge id="23558" label="1110011101 (1) 1110001101" source="21768" target="21927" cy:directed="1"/>
      <edge id="23557" label="1110011101 (1) 1100011101" source="21768" target="21786" cy:directed="1"/>
      <edge id="23556" label="1110011101 (1) 1010011101" source="21768" target="21773" cy:directed="1"/>
      <edge id="23555" label="1111101101 (1) 1111100101" source="21767" target="22025" cy:directed="1"/>
      <edge id="23554" label="1111101101 (1) 1111111101" source="21767" target="21647" cy:directed="1"/>
      <edge id="23553" label="1111101101 (1) 1110101101" source="21767" target="21813" cy:directed="1"/>
      <edge id="23552" label="0110011011 (1) 0110011111" source="21766" target="21605" cy:directed="1"/>
      <edge id="23551" label="0110011011 (1) 0110010011" source="21766" target="22022" cy:directed="1"/>
      <edge id="23550" label="0110011011 (1) 0110001011" source="21766" target="21925" cy:directed="1"/>
      <edge id="23549" label="0110011011 (1) 0100011011" source="21766" target="21783" cy:directed="1"/>
      <edge id="23548" label="0110011011 (1) 0010011011" source="21766" target="21772" cy:directed="1"/>
      <edge id="23547" label="0110011101 (1) 0110011111" source="21765" target="21605" cy:directed="1"/>
      <edge id="23546" label="0110011101 (1) 0110001101" source="21765" target="21924" cy:directed="1"/>
      <edge id="23545" label="0110011101 (1) 0100011101" source="21765" target="21782" cy:directed="1"/>
      <edge id="23544" label="0110011101 (1) 0010011101" source="21765" target="21771" cy:directed="1"/>
      <edge id="23543" label="0111101101 (1) 0111100101" source="21764" target="22019" cy:directed="1"/>
      <edge id="23542" label="0111101101 (1) 0111111101" source="21764" target="21646" cy:directed="1"/>
      <edge id="23541" label="0111101101 (1) 0110101101" source="21764" target="21812" cy:directed="1"/>
      <edge id="23540" label="0111101101 (1) 0011101101" source="21764" target="21770" cy:directed="1"/>
      <edge id="23539" label="1001111110 (1) 1001111100" source="21763" target="22193" cy:directed="1"/>
      <edge id="23538" label="1001111110 (1) 1001110110" source="21763" target="21815" cy:directed="1"/>
      <edge id="23537" label="1001111110 (1) 1001011110" source="21763" target="21961" cy:directed="1"/>
      <edge id="23536" label="1001111110 (1) 1011111110" source="21763" target="21751" cy:directed="1"/>
      <edge id="23535" label="0001111110 (1) 0001111100" source="21762" target="22189" cy:directed="1"/>
      <edge id="23534" label="0001111110 (1) 0001110110" source="21762" target="21814" cy:directed="1"/>
      <edge id="23533" label="0001111110 (1) 0001011110" source="21762" target="21960" cy:directed="1"/>
      <edge id="23532" label="0001111110 (1) 0011111110" source="21762" target="21750" cy:directed="1"/>
      <edge id="23531" label="1101111110 (1) 1101111100" source="21761" target="22183" cy:directed="1"/>
      <edge id="23530" label="1101111110 (1) 1101110110" source="21761" target="21811" cy:directed="1"/>
      <edge id="23529" label="1101111110 (1) 1111111110" source="21761" target="21749" cy:directed="1"/>
      <edge id="23528" label="1101111110 (1) 1001111110" source="21761" target="21763" cy:directed="1"/>
      <edge id="23527" label="0101111110 (1) 0101111100" source="21760" target="22182" cy:directed="1"/>
      <edge id="23526" label="0101111110 (1) 0101110110" source="21760" target="21809" cy:directed="1"/>
      <edge id="23525" label="0101111110 (1) 0111111110" source="21760" target="21748" cy:directed="1"/>
      <edge id="23524" label="0101111110 (1) 0001111110" source="21760" target="21762" cy:directed="1"/>
      <edge id="23523" label="1001011011 (1) 1001011111" source="21759" target="21582" cy:directed="1"/>
      <edge id="23522" label="1001011011 (1) 1001010011" source="21759" target="22007" cy:directed="1"/>
      <edge id="23521" label="1001011011 (1) 1001001011" source="21759" target="21904" cy:directed="1"/>
      <edge id="23520" label="1001011101 (1) 1001011111" source="21758" target="21582" cy:directed="1"/>
      <edge id="23519" label="1001011101 (1) 1001001101" source="21758" target="21903" cy:directed="1"/>
      <edge id="23518" label="1001011101 (1) 1011011101" source="21758" target="21742" cy:directed="1"/>
      <edge id="23517" label="0001011011 (1) 0001011111" source="21757" target="21583" cy:directed="1"/>
      <edge id="23516" label="0001011011 (1) 0001010011" source="21757" target="22004" cy:directed="1"/>
      <edge id="23515" label="0001011011 (1) 0001001011" source="21757" target="21899" cy:directed="1"/>
      <edge id="23514" label="0001011101 (1) 0001011111" source="21756" target="21583" cy:directed="1"/>
      <edge id="23513" label="0001011101 (1) 0001001101" source="21756" target="21898" cy:directed="1"/>
      <edge id="23512" label="0001011101 (1) 0011011101" source="21756" target="21740" cy:directed="1"/>
      <edge id="23511" label="1101011011 (1) 1101011111" source="21755" target="21579" cy:directed="1"/>
      <edge id="23510" label="1101011011 (1) 1101010011" source="21755" target="21992" cy:directed="1"/>
      <edge id="23509" label="1101011011 (1) 1101001011" source="21755" target="21889" cy:directed="1"/>
      <edge id="23508" label="1101011011 (1) 1101111011" source="21755" target="21558" cy:directed="1"/>
      <edge id="23507" label="1101011011 (1) 1001011011" source="21755" target="21759" cy:directed="1"/>
      <edge id="23506" label="1101011101 (1) 1101011111" source="21754" target="21579" cy:directed="1"/>
      <edge id="23505" label="1101011101 (1) 1101001101" source="21754" target="21888" cy:directed="1"/>
      <edge id="23504" label="1101011101 (1) 1101111101" source="21754" target="21669" cy:directed="1"/>
      <edge id="23503" label="1101011101 (1) 1001011101" source="21754" target="21758" cy:directed="1"/>
      <edge id="23502" label="0101011011 (1) 0101011111" source="21753" target="21578" cy:directed="1"/>
      <edge id="23501" label="0101011011 (1) 0101010011" source="21753" target="21989" cy:directed="1"/>
      <edge id="23500" label="0101011011 (1) 0101001011" source="21753" target="21884" cy:directed="1"/>
      <edge id="23499" label="0101011011 (1) 0101111011" source="21753" target="21556" cy:directed="1"/>
      <edge id="23498" label="0101011011 (1) 0001011011" source="21753" target="21757" cy:directed="1"/>
      <edge id="23497" label="0101011101 (1) 0101011111" source="21752" target="21578" cy:directed="1"/>
      <edge id="23496" label="0101011101 (1) 0101001101" source="21752" target="21883" cy:directed="1"/>
      <edge id="23495" label="0101011101 (1) 0101111101" source="21752" target="21667" cy:directed="1"/>
      <edge id="23494" label="0101011101 (1) 0001011101" source="21752" target="21756" cy:directed="1"/>
      <edge id="23493" label="1011111110 (1) 1011111100" source="21751" target="22162" cy:directed="1"/>
      <edge id="23492" label="1011111110 (1) 1011110110" source="21751" target="21801" cy:directed="1"/>
      <edge id="23491" label="1011111110 (1) 1011011110" source="21751" target="21918" cy:directed="1"/>
      <edge id="23490" label="1011111110 (1) 1010111110" source="21751" target="21779" cy:directed="1"/>
      <edge id="23489" label="0011111110 (1) 0011111100" source="21750" target="22158" cy:directed="1"/>
      <edge id="23488" label="0011111110 (1) 0011110110" source="21750" target="21800" cy:directed="1"/>
      <edge id="23487" label="0011111110 (1) 0011011110" source="21750" target="21916" cy:directed="1"/>
      <edge id="23486" label="0011111110 (1) 0010111110" source="21750" target="21778" cy:directed="1"/>
      <edge id="23485" label="1111111110 (1) 1111111100" source="21749" target="22157" cy:directed="1"/>
      <edge id="23484" label="1111111110 (1) 1111110110" source="21749" target="21791" cy:directed="1"/>
      <edge id="23483" label="1111111110 (1) 1110111110" source="21749" target="21776" cy:directed="1"/>
      <edge id="23482" label="1111111110 (1) 1011111110" source="21749" target="21751" cy:directed="1"/>
      <edge id="23481" label="0111111110 (1) 0111111100" source="21748" target="22156" cy:directed="1"/>
      <edge id="23480" label="0111111110 (1) 0111110110" source="21748" target="21790" cy:directed="1"/>
      <edge id="23479" label="0111111110 (1) 0110111110" source="21748" target="21777" cy:directed="1"/>
      <edge id="23478" label="0111111110 (1) 0011111110" source="21748" target="21750" cy:directed="1"/>
      <edge id="23477" label="0000010111 (1) 0000000111" source="21747" target="21865" cy:directed="1"/>
      <edge id="23476" label="0000010111 (1) 0000110111" source="21747" target="21627" cy:directed="1"/>
      <edge id="23475" label="0000010111 (1) 0001010111" source="21747" target="21696" cy:directed="1"/>
      <edge id="23474" label="0000010111 (1) 0010010111" source="21747" target="21724" cy:directed="1"/>
      <edge id="23473" label="1101100011 (1) 1101100001" source="21746" target="22153" cy:directed="1"/>
      <edge id="23472" label="1101100011 (1) 1101100111" source="21746" target="21654" cy:directed="1"/>
      <edge id="23471" label="1101100011 (1) 1101110011" source="21746" target="21653" cy:directed="1"/>
      <edge id="23470" label="1101100011 (1) 1111100011" source="21746" target="21725" cy:directed="1"/>
      <edge id="23469" label="0101100011 (1) 0101100001" source="21745" target="22150" cy:directed="1"/>
      <edge id="23468" label="0101100011 (1) 0101100111" source="21745" target="21650" cy:directed="1"/>
      <edge id="23467" label="0101100011 (1) 0101110011" source="21745" target="21649" cy:directed="1"/>
      <edge id="23466" label="0101100011 (1) 0111100011" source="21745" target="21727" cy:directed="1"/>
      <edge id="23465" label="0101100011 (1) 0001100011" source="21745" target="21718" cy:directed="1"/>
      <edge id="23464" label="1000010111 (1) 1000000111" source="21744" target="21870" cy:directed="1"/>
      <edge id="23463" label="1000010111 (1) 1000110111" source="21744" target="21626" cy:directed="1"/>
      <edge id="23462" label="1000010111 (1) 1001010111" source="21744" target="21697" cy:directed="1"/>
      <edge id="23461" label="1000010111 (1) 1010010111" source="21744" target="21726" cy:directed="1"/>
      <edge id="23460" label="1011011011 (1) 1011011111" source="21743" target="21568" cy:directed="1"/>
      <edge id="23459" label="1011011011 (1) 1011010011" source="21743" target="21958" cy:directed="1"/>
      <edge id="23458" label="1011011011 (1) 1011001011" source="21743" target="21873" cy:directed="1"/>
      <edge id="23457" label="1011011011 (1) 1010011011" source="21743" target="21774" cy:directed="1"/>
      <edge id="23456" label="1011011011 (1) 1001011011" source="21743" target="21759" cy:directed="1"/>
      <edge id="23455" label="1011011101 (1) 1011011111" source="21742" target="21568" cy:directed="1"/>
      <edge id="23454" label="1011011101 (1) 1011001101" source="21742" target="21872" cy:directed="1"/>
      <edge id="23453" label="1011011101 (1) 1010011101" source="21742" target="21773" cy:directed="1"/>
      <edge id="23452" label="0011011011 (1) 0011011111" source="21741" target="21569" cy:directed="1"/>
      <edge id="23451" label="0011011011 (1) 0011010011" source="21741" target="21954" cy:directed="1"/>
      <edge id="23450" label="0011011011 (1) 0011001011" source="21741" target="21868" cy:directed="1"/>
      <edge id="23449" label="0011011011 (1) 0010011011" source="21741" target="21772" cy:directed="1"/>
      <edge id="23448" label="0011011011 (1) 0001011011" source="21741" target="21757" cy:directed="1"/>
      <edge id="23447" label="0011011101 (1) 0011011111" source="21740" target="21569" cy:directed="1"/>
      <edge id="23446" label="0011011101 (1) 0011001101" source="21740" target="21867" cy:directed="1"/>
      <edge id="23445" label="0011011101 (1) 0010011101" source="21740" target="21771" cy:directed="1"/>
      <edge id="23444" label="1100010111 (1) 1100000111" source="21739" target="21864" cy:directed="1"/>
      <edge id="23443" label="1100010111 (1) 1100110111" source="21739" target="21625" cy:directed="1"/>
      <edge id="23442" label="1100010111 (1) 1101010111" source="21739" target="21688" cy:directed="1"/>
      <edge id="23441" label="1100010111 (1) 1000010111" source="21739" target="21744" cy:directed="1"/>
      <edge id="23440" label="0100010111 (1) 0100000111" source="21738" target="21858" cy:directed="1"/>
      <edge id="23439" label="0100010111 (1) 0100110111" source="21738" target="21624" cy:directed="1"/>
      <edge id="23438" label="0100010111 (1) 0101010111" source="21738" target="21687" cy:directed="1"/>
      <edge id="23437" label="0100010111 (1) 0000010111" source="21738" target="21747" cy:directed="1"/>
      <edge id="23436" label="0111011011 (1) 0111011111" source="21737" target="21567" cy:directed="1"/>
      <edge id="23435" label="0111011011 (1) 0111010011" source="21737" target="21946" cy:directed="1"/>
      <edge id="23434" label="0111011011 (1) 0111001011" source="21737" target="21854" cy:directed="1"/>
      <edge id="23433" label="0111011011 (1) 0111111011" source="21737" target="21548" cy:directed="1"/>
      <edge id="23432" label="0111011011 (1) 0110011011" source="21737" target="21766" cy:directed="1"/>
      <edge id="23431" label="0111011011 (1) 0101011011" source="21737" target="21753" cy:directed="1"/>
      <edge id="23430" label="0111011011 (1) 0011011011" source="21737" target="21741" cy:directed="1"/>
      <edge id="23429" label="0111011101 (1) 0111011111" source="21736" target="21567" cy:directed="1"/>
      <edge id="23428" label="0111011101 (1) 0111001101" source="21736" target="21853" cy:directed="1"/>
      <edge id="23427" label="0111011101 (1) 0111111101" source="21736" target="21646" cy:directed="1"/>
      <edge id="23426" label="0111011101 (1) 0110011101" source="21736" target="21765" cy:directed="1"/>
      <edge id="23425" label="0111011101 (1) 0101011101" source="21736" target="21752" cy:directed="1"/>
      <edge id="23424" label="0111011101 (1) 0011011101" source="21736" target="21740" cy:directed="1"/>
      <edge id="23423" label="1111011011 (1) 1111011111" source="21735" target="21566" cy:directed="1"/>
      <edge id="23422" label="1111011011 (1) 1111010011" source="21735" target="21942" cy:directed="1"/>
      <edge id="23421" label="1111011011 (1) 1111001011" source="21735" target="21863" cy:directed="1"/>
      <edge id="23420" label="1111011011 (1) 1111111011" source="21735" target="21550" cy:directed="1"/>
      <edge id="23419" label="1111011011 (1) 1110011011" source="21735" target="21769" cy:directed="1"/>
      <edge id="23418" label="1111011011 (1) 1101011011" source="21735" target="21755" cy:directed="1"/>
      <edge id="23417" label="1111011011 (1) 1011011011" source="21735" target="21743" cy:directed="1"/>
      <edge id="23416" label="1111011101 (1) 1111011111" source="21734" target="21566" cy:directed="1"/>
      <edge id="23415" label="1111011101 (1) 1111001101" source="21734" target="21862" cy:directed="1"/>
      <edge id="23414" label="1111011101 (1) 1111111101" source="21734" target="21647" cy:directed="1"/>
      <edge id="23413" label="1111011101 (1) 1110011101" source="21734" target="21768" cy:directed="1"/>
      <edge id="23412" label="1111011101 (1) 1101011101" source="21734" target="21754" cy:directed="1"/>
      <edge id="23411" label="1111011101 (1) 1011011101" source="21734" target="21742" cy:directed="1"/>
      <edge id="23410" label="0000111101 (1) 0000011101" source="21733" target="21802" cy:directed="1"/>
      <edge id="23409" label="0000111101 (1) 0001111101" source="21733" target="21670" cy:directed="1"/>
      <edge id="23408" label="0000111101 (1) 0010111101" source="21733" target="21709" cy:directed="1"/>
      <edge id="23407" label="1000111101 (1) 1000011101" source="21732" target="21796" cy:directed="1"/>
      <edge id="23406" label="1000111101 (1) 1001111101" source="21732" target="21672" cy:directed="1"/>
      <edge id="23405" label="1000111101 (1) 1010111101" source="21732" target="21710" cy:directed="1"/>
      <edge id="23404" label="1101101110 (1) 1101101100" source="21731" target="22133" cy:directed="1"/>
      <edge id="23403" label="1101101110 (1) 1101101010" source="21731" target="22048" cy:directed="1"/>
      <edge id="23402" label="1101101110 (1) 1101100110" source="21731" target="21919" cy:directed="1"/>
      <edge id="23401" label="1101101110 (1) 1101111110" source="21731" target="21761" cy:directed="1"/>
      <edge id="23400" label="1101101110 (1) 1111101110" source="21731" target="21701" cy:directed="1"/>
      <edge id="23399" label="0101101110 (1) 0101101100" source="21730" target="22131" cy:directed="1"/>
      <edge id="23398" label="0101101110 (1) 0101101010" source="21730" target="22047" cy:directed="1"/>
      <edge id="23397" label="0101101110 (1) 0101100110" source="21730" target="21917" cy:directed="1"/>
      <edge id="23396" label="0101101110 (1) 0101111110" source="21730" target="21760" cy:directed="1"/>
      <edge id="23395" label="0101101110 (1) 0111101110" source="21730" target="21700" cy:directed="1"/>
      <edge id="23394" label="0101101110 (1) 0001101110" source="21730" target="21694" cy:directed="1"/>
      <edge id="23393" label="0100111101 (1) 0100011101" source="21729" target="21782" cy:directed="1"/>
      <edge id="23392" label="0100111101 (1) 0101111101" source="21729" target="21667" cy:directed="1"/>
      <edge id="23391" label="0100111101 (1) 0110111101" source="21729" target="21698" cy:directed="1"/>
      <edge id="23390" label="0100111101 (1) 0000111101" source="21729" target="21733" cy:directed="1"/>
      <edge id="23389" label="1100111101 (1) 1100011101" source="21728" target="21786" cy:directed="1"/>
      <edge id="23388" label="1100111101 (1) 1101111101" source="21728" target="21669" cy:directed="1"/>
      <edge id="23387" label="1100111101 (1) 1110111101" source="21728" target="21699" cy:directed="1"/>
      <edge id="23386" label="1100111101 (1) 1000111101" source="21728" target="21732" cy:directed="1"/>
      <edge id="23385" label="0111100011 (1) 0111100001" source="21727" target="22124" cy:directed="1"/>
      <edge id="23384" label="0111100011 (1) 0111100111" source="21727" target="21635" cy:directed="1"/>
      <edge id="23383" label="0111100011 (1) 0111110011" source="21727" target="21634" cy:directed="1"/>
      <edge id="23382" label="0111100011 (1) 0110100011" source="21727" target="21702" cy:directed="1"/>
      <edge id="23381" label="0111100011 (1) 0011100011" source="21727" target="21659" cy:directed="1"/>
      <edge id="23380" label="1010010111 (1) 1010000111" source="21726" target="21833" cy:directed="1"/>
      <edge id="23379" label="1010010111 (1) 1010110111" source="21726" target="21623" cy:directed="1"/>
      <edge id="23378" label="1111100011 (1) 1111100001" source="21725" target="22128" cy:directed="1"/>
      <edge id="23377" label="1111100011 (1) 1111100111" source="21725" target="21637" cy:directed="1"/>
      <edge id="23376" label="1111100011 (1) 1111110011" source="21725" target="21636" cy:directed="1"/>
      <edge id="23375" label="1111100011 (1) 1110100011" source="21725" target="21706" cy:directed="1"/>
      <edge id="23374" label="0010010111 (1) 0010000111" source="21724" target="21834" cy:directed="1"/>
      <edge id="23373" label="0010010111 (1) 0010110111" source="21724" target="21622" cy:directed="1"/>
      <edge id="23372" label="1110010111 (1) 1110000111" source="21723" target="21827" cy:directed="1"/>
      <edge id="23371" label="1110010111 (1) 1110110111" source="21723" target="21618" cy:directed="1"/>
      <edge id="23370" label="1110010111 (1) 1100010111" source="21723" target="21739" cy:directed="1"/>
      <edge id="23369" label="1110010111 (1) 1010010111" source="21723" target="21726" cy:directed="1"/>
      <edge id="23368" label="0110010111 (1) 0110000111" source="21722" target="21824" cy:directed="1"/>
      <edge id="23367" label="0110010111 (1) 0110110111" source="21722" target="21616" cy:directed="1"/>
      <edge id="23366" label="0110010111 (1) 0100010111" source="21722" target="21738" cy:directed="1"/>
      <edge id="23365" label="0110010111 (1) 0010010111" source="21722" target="21724" cy:directed="1"/>
      <edge id="23364" label="0000100011 (1) 0000100001" source="21721" target="22123" cy:directed="1"/>
      <edge id="23363" label="0000100011 (1) 0000100111" source="21721" target="21720" cy:directed="1"/>
      <edge id="23362" label="0000100011 (1) 0000110011" source="21721" target="21719" cy:directed="1"/>
      <edge id="23361" label="0000100011 (1) 0000000011" source="21721" target="22238" cy:directed="1"/>
      <edge id="23360" label="0000100011 (1) 0001100011" source="21721" target="21718" cy:directed="1"/>
      <edge id="23359" label="0000100011 (1) 0010100011" source="21721" target="21717" cy:directed="1"/>
      <edge id="23358" label="0000100111 (1) 0000100101" source="21720" target="22122" cy:directed="1"/>
      <edge id="23357" label="0000100111 (1) 0000110111" source="21720" target="21627" cy:directed="1"/>
      <edge id="23356" label="0000100111 (1) 0001100111" source="21720" target="21661" cy:directed="1"/>
      <edge id="23355" label="0000100111 (1) 0010100111" source="21720" target="21686" cy:directed="1"/>
      <edge id="23354" label="0000110011 (1) 0000110001" source="21719" target="22121" cy:directed="1"/>
      <edge id="23353" label="0000110011 (1) 0000110111" source="21719" target="21627" cy:directed="1"/>
      <edge id="23352" label="0000110011 (1) 0000010011" source="21719" target="22073" cy:directed="1"/>
      <edge id="23351" label="0000110011 (1) 0001110011" source="21719" target="21660" cy:directed="1"/>
      <edge id="23350" label="0000110011 (1) 0010110011" source="21719" target="21685" cy:directed="1"/>
      <edge id="23349" label="0001100011 (1) 0001100001" source="21718" target="22120" cy:directed="1"/>
      <edge id="23348" label="0001100011 (1) 0001100111" source="21718" target="21661" cy:directed="1"/>
      <edge id="23347" label="0001100011 (1) 0001110011" source="21718" target="21660" cy:directed="1"/>
      <edge id="23346" label="0001100011 (1) 0001000011" source="21718" target="22166" cy:directed="1"/>
      <edge id="23345" label="0001100011 (1) 0011100011" source="21718" target="21659" cy:directed="1"/>
      <edge id="23344" label="0010100011 (1) 0010100001" source="21717" target="22119" cy:directed="1"/>
      <edge id="23343" label="0010100011 (1) 0010100111" source="21717" target="21686" cy:directed="1"/>
      <edge id="23342" label="0010100011 (1) 0010110011" source="21717" target="21685" cy:directed="1"/>
      <edge id="23341" label="0010100011 (1) 0010000011" source="21717" target="22197" cy:directed="1"/>
      <edge id="23340" label="1000100011 (1) 1000100001" source="21716" target="22118" cy:directed="1"/>
      <edge id="23339" label="1000100011 (1) 1000100111" source="21716" target="21715" cy:directed="1"/>
      <edge id="23338" label="1000100011 (1) 1000110011" source="21716" target="21714" cy:directed="1"/>
      <edge id="23337" label="1000100011 (1) 1000000011" source="21716" target="22234" cy:directed="1"/>
      <edge id="23336" label="1000100011 (1) 1001100011" source="21716" target="21713" cy:directed="1"/>
      <edge id="23335" label="1000100011 (1) 1010100011" source="21716" target="21712" cy:directed="1"/>
      <edge id="23334" label="1000100011 (1) 1100100011" source="21716" target="21711" cy:directed="1"/>
      <edge id="23333" label="1000100111 (1) 1000100101" source="21715" target="22117" cy:directed="1"/>
      <edge id="23332" label="1000100111 (1) 1000110111" source="21715" target="21626" cy:directed="1"/>
      <edge id="23331" label="1000100111 (1) 1001100111" source="21715" target="21658" cy:directed="1"/>
      <edge id="23330" label="1000100111 (1) 1010100111" source="21715" target="21684" cy:directed="1"/>
      <edge id="23329" label="1000100111 (1) 1100100111" source="21715" target="21708" cy:directed="1"/>
      <edge id="23328" label="1000110011 (1) 1000110001" source="21714" target="22116" cy:directed="1"/>
      <edge id="23327" label="1000110011 (1) 1000110111" source="21714" target="21626" cy:directed="1"/>
      <edge id="23326" label="1000110011 (1) 1000010011" source="21714" target="22078" cy:directed="1"/>
      <edge id="23325" label="1000110011 (1) 1001110011" source="21714" target="21657" cy:directed="1"/>
      <edge id="23324" label="1000110011 (1) 1010110011" source="21714" target="21683" cy:directed="1"/>
      <edge id="23323" label="1001100011 (1) 1001100001" source="21713" target="22115" cy:directed="1"/>
      <edge id="23322" label="1001100011 (1) 1001100111" source="21713" target="21658" cy:directed="1"/>
      <edge id="23321" label="1001100011 (1) 1001110011" source="21713" target="21657" cy:directed="1"/>
      <edge id="23320" label="1001100011 (1) 1001000011" source="21713" target="22164" cy:directed="1"/>
      <edge id="23319" label="1001100011 (1) 1011100011" source="21713" target="21656" cy:directed="1"/>
      <edge id="23318" label="1001100011 (1) 1101100011" source="21713" target="21746" cy:directed="1"/>
      <edge id="23317" label="1010100011 (1) 1010100001" source="21712" target="22114" cy:directed="1"/>
      <edge id="23316" label="1010100011 (1) 1010100111" source="21712" target="21684" cy:directed="1"/>
      <edge id="23315" label="1010100011 (1) 1010110011" source="21712" target="21683" cy:directed="1"/>
      <edge id="23314" label="1010100011 (1) 1010000011" source="21712" target="22201" cy:directed="1"/>
      <edge id="23313" label="1010100011 (1) 1110100011" source="21712" target="21706" cy:directed="1"/>
      <edge id="23312" label="1100100011 (1) 1100100001" source="21711" target="22113" cy:directed="1"/>
      <edge id="23311" label="1100100011 (1) 1100100111" source="21711" target="21708" cy:directed="1"/>
      <edge id="23310" label="1100100011 (1) 1100110011" source="21711" target="21707" cy:directed="1"/>
      <edge id="23309" label="1100100011 (1) 1100000011" source="21711" target="22228" cy:directed="1"/>
      <edge id="23308" label="1100100011 (1) 1101100011" source="21711" target="21746" cy:directed="1"/>
      <edge id="23307" label="1100100011 (1) 1110100011" source="21711" target="21706" cy:directed="1"/>
      <edge id="23306" label="1010111101 (1) 1010011101" source="21710" target="21773" cy:directed="1"/>
      <edge id="23305" label="0010111101 (1) 0010011101" source="21709" target="21771" cy:directed="1"/>
      <edge id="23304" label="1100100111 (1) 1100100101" source="21708" target="22109" cy:directed="1"/>
      <edge id="23303" label="1100100111 (1) 1100110111" source="21708" target="21625" cy:directed="1"/>
      <edge id="23302" label="1100100111 (1) 1101100111" source="21708" target="21654" cy:directed="1"/>
      <edge id="23301" label="1100100111 (1) 1110100111" source="21708" target="21677" cy:directed="1"/>
      <edge id="23300" label="1100110011 (1) 1100110001" source="21707" target="22108" cy:directed="1"/>
      <edge id="23299" label="1100110011 (1) 1100110111" source="21707" target="21625" cy:directed="1"/>
      <edge id="23298" label="1100110011 (1) 1100010011" source="21707" target="22060" cy:directed="1"/>
      <edge id="23297" label="1100110011 (1) 1101110011" source="21707" target="21653" cy:directed="1"/>
      <edge id="23296" label="1100110011 (1) 1110110011" source="21707" target="21676" cy:directed="1"/>
      <edge id="23295" label="1100110011 (1) 1000110011" source="21707" target="21714" cy:directed="1"/>
      <edge id="23294" label="1110100011 (1) 1110100001" source="21706" target="22107" cy:directed="1"/>
      <edge id="23293" label="1110100011 (1) 1110100111" source="21706" target="21677" cy:directed="1"/>
      <edge id="23292" label="1110100011 (1) 1110110011" source="21706" target="21676" cy:directed="1"/>
      <edge id="23291" label="1110100011 (1) 1110000011" source="21706" target="22188" cy:directed="1"/>
      <edge id="23290" label="0100100011 (1) 0100100001" source="21705" target="22106" cy:directed="1"/>
      <edge id="23289" label="0100100011 (1) 0100100111" source="21705" target="21704" cy:directed="1"/>
      <edge id="23288" label="0100100011 (1) 0100110011" source="21705" target="21703" cy:directed="1"/>
      <edge id="23287" label="0100100011 (1) 0100000011" source="21705" target="22224" cy:directed="1"/>
      <edge id="23286" label="0100100011 (1) 0101100011" source="21705" target="21745" cy:directed="1"/>
      <edge id="23285" label="0100100011 (1) 0110100011" source="21705" target="21702" cy:directed="1"/>
      <edge id="23284" label="0100100011 (1) 0000100011" source="21705" target="21721" cy:directed="1"/>
      <edge id="23283" label="0100100111 (1) 0100100101" source="21704" target="22105" cy:directed="1"/>
      <edge id="23282" label="0100100111 (1) 0100110111" source="21704" target="21624" cy:directed="1"/>
      <edge id="23281" label="0100100111 (1) 0101100111" source="21704" target="21650" cy:directed="1"/>
      <edge id="23280" label="0100100111 (1) 0110100111" source="21704" target="21675" cy:directed="1"/>
      <edge id="23279" label="0100100111 (1) 0000100111" source="21704" target="21720" cy:directed="1"/>
      <edge id="23278" label="0100110011 (1) 0100110001" source="21703" target="22104" cy:directed="1"/>
      <edge id="23277" label="0100110011 (1) 0100110111" source="21703" target="21624" cy:directed="1"/>
      <edge id="23276" label="0100110011 (1) 0100010011" source="21703" target="22053" cy:directed="1"/>
[truncated: 75,632 more chars]
