# Supplementary material
Source: publisher figshare collection journal article supplement (https://springernature.figshare.com/ndownloader/files/17562821)
Supplement: Supplementary file 1 [file 17562821 › CytoscapeSession-2018_09_25-21_15/networks/26652-STG%2C+Model+2.xgmml]

<?xml version="1.0" encoding="UTF-8" standalone="yes"?>
<graph id="26652" label="STG, Model 2" cy:view="0" cy:registered="0" cy:documentVersion="3.0" xmlns:dc="http://purl.org/dc/elements/1.1/" xmlns:xlink="http://www.w3.org/1999/xlink" xmlns:rdf="http://www.w3.org/1999/02/22-rdf-syntax-ns#" xmlns:cy="http://www.cytoscape.org" xmlns="http://www.cs.rpi.edu/XGMML">
  <att>
    <graph id="26668" label="STG, Model 2" cy:registered="1">
      <node id="27701" label="0000000000"/>
      <node id="27700" label="0000000010"/>
      <node id="27699" label="0001000000"/>
      <node id="27698" label="1000000000"/>
      <node id="27697" label="1000000010"/>
      <node id="27696" label="1001000000"/>
      <node id="27695" label="1100000000"/>
      <node id="27694" label="1100000010"/>
      <node id="27693" label="1101000000"/>
      <node id="27692" label="0100000000"/>
      <node id="27691" label="0100000010"/>
      <node id="27690" label="0101000000"/>
      <node id="27689" label="1010000000"/>
      <node id="27688" label="1010000010"/>
      <node id="27687" label="1110000000"/>
      <node id="27686" label="0010000000"/>
      <node id="27685" label="0010000010"/>
      <node id="27684" label="1110000010"/>
      <node id="27683" label="0110000000"/>
      <node id="27682" label="0110000010"/>
      <node id="27681" label="0001000010"/>
      <node id="27680" label="1001000010"/>
      <node id="27679" label="1101000010"/>
      <node id="27678" label="1101100000"/>
      <node id="27677" label="0101000010"/>
      <node id="27676" label="0101100000"/>
      <node id="27675" label="1011000000"/>
      <node id="27674" label="1011000010"/>
      <node id="27673" label="1111000000"/>
      <node id="27672" label="0011000000"/>
      <node id="27671" label="0011000010"/>
      <node id="27670" label="1111000010"/>
      <node id="27669" label="1111100000"/>
      <node id="27668" label="0111000000"/>
      <node id="27667" label="0111000010"/>
      <node id="27666" label="0111100000"/>
      <node id="27665" label="1000100000"/>
      <node id="27664" label="1000110000"/>
      <node id="27663" label="1001100000"/>
      <node id="27662" label="1010100000"/>
      <node id="27661" label="1100100000"/>
      <node id="27660" label="0000100000"/>
      <node id="27659" label="0000110000"/>
      <node id="27658" label="0001100000"/>
      <node id="27657" label="0010100000"/>
      <node id="27656" label="1100110000"/>
      <node id="27655" label="0100100000"/>
      <node id="27654" label="0100110000"/>
      <node id="27653" label="1010110000"/>
      <node id="27652" label="1110100000"/>
      <node id="27651" label="0010110000"/>
      <node id="27650" label="1110110000"/>
      <node id="27649" label="0110100000"/>
      <node id="27648" label="0110110000"/>
      <node id="27647" label="1001110000"/>
      <node id="27646" label="1011100000"/>
      <node id="27645" label="1000010000"/>
      <node id="27644" label="1000010010"/>
      <node id="27643" label="1000011000"/>
      <node id="27642" label="1001010000"/>
      <node id="27641" label="0001110000"/>
      <node id="27640" label="0011100000"/>
      <node id="27639" label="0000010000"/>
      <node id="27638" label="0000010010"/>
      <node id="27637" label="0000011000"/>
      <node id="27636" label="0001010000"/>
      <node id="27635" label="1101110000"/>
      <node id="27634" label="1100010000"/>
      <node id="27633" label="1100010010"/>
      <node id="27632" label="1100011000"/>
      <node id="27631" label="1101010000"/>
      <node id="27630" label="0101110000"/>
      <node id="27629" label="0100010000"/>
      <node id="27628" label="0100010010"/>
      <node id="27627" label="0100011000"/>
      <node id="27626" label="0101010000"/>
      <node id="27625" label="1011110000"/>
      <node id="27624" label="1010010000"/>
      <node id="27623" label="1010010010"/>
      <node id="27622" label="1010011000"/>
      <node id="27621" label="0011110000"/>
      <node id="27620" label="0010010000"/>
      <node id="27619" label="0010010010"/>
      <node id="27618" label="0010011000"/>
      <node id="27617" label="1111110000"/>
      <node id="27616" label="1110010000"/>
      <node id="27615" label="1110010010"/>
      <node id="27614" label="1110011000"/>
      <node id="27613" label="0111110000"/>
      <node id="27612" label="0110010000"/>
      <node id="27611" label="0110010010"/>
      <node id="27610" label="0110011000"/>
      <node id="27609" label="1001010010"/>
      <node id="27608" label="1001011000"/>
      <node id="27607" label="0001010010"/>
      <node id="27606" label="0001011000"/>
      <node id="27605" label="1101010010"/>
      <node id="27604" label="1101011000"/>
      <node id="27603" label="0101010010"/>
      <node id="27602" label="0101011000"/>
      <node id="27601" label="1000001000"/>
      <node id="27600" label="1000001010"/>
      <node id="27599" label="1001001000"/>
      <node id="27598" label="1100001000"/>
      <node id="27597" label="0000001000"/>
      <node id="27596" label="0000001010"/>
      <node id="27595" label="0001001000"/>
      <node id="27594" label="1100001010"/>
      <node id="27593" label="1101001000"/>
      <node id="27592" label="0100001000"/>
      <node id="27591" label="0100001010"/>
      <node id="27590" label="0101001000"/>
      <node id="27589" label="1011010000"/>
      <node id="27588" label="1011010010"/>
      <node id="27587" label="1011011000"/>
      <node id="27586" label="0011010000"/>
      <node id="27585" label="0011010010"/>
      <node id="27584" label="0011011000"/>
      <node id="27583" label="0111010000"/>
      <node id="27582" label="0111010010"/>
      <node id="27581" label="0111011000"/>
      <node id="27580" label="1111010000"/>
      <node id="27579" label="1111010010"/>
      <node id="27578" label="1111011000"/>
      <node id="27577" label="1010001000"/>
      <node id="27576" label="1010001010"/>
      <node id="27575" label="1110001000"/>
      <node id="27574" label="0010001000"/>
      <node id="27573" label="0010001010"/>
      <node id="27572" label="1000111000"/>
      <node id="27571" label="1110001010"/>
      <node id="27570" label="0000111000"/>
      <node id="27569" label="0110001000"/>
      <node id="27568" label="0110001010"/>
      <node id="27567" label="1100111000"/>
      <node id="27566" label="0100111000"/>
      <node id="27565" label="1010111000"/>
      <node id="27564" label="1001001010"/>
      <node id="27563" label="0010111000"/>
      <node id="27562" label="0001001010"/>
      <node id="27561" label="1110111000"/>
      <node id="27560" label="1101001010"/>
      <node id="27559" label="1101101000"/>
      <node id="27558" label="0110111000"/>
      <node id="27557" label="0101001010"/>
      <node id="27556" label="0101101000"/>
      <node id="27555" label="1000000100"/>
      <node id="27554" label="1000000110"/>
      <node id="27553" label="1000100100"/>
      <node id="27552" label="1001000100"/>
      <node id="27551" label="1010000100"/>
      <node id="27550" label="1100000100"/>
      <node id="27549" label="1011001000"/>
      <node id="27548" label="1011001010"/>
      <node id="27547" label="1111001000"/>
      <node id="27546" label="0000000100"/>
      <node id="27545" label="0000000110"/>
      <node id="27544" label="0000100100"/>
      <node id="27543" label="0001000100"/>
      <node id="27542" label="0010000100"/>
      <node id="27541" label="0011001000"/>
      <node id="27540" label="0011001010"/>
      <node id="27539" label="1001111000"/>
      <node id="27538" label="1100000110"/>
      <node id="27537" label="1100100100"/>
      <node id="27536" label="1101000100"/>
      <node id="27535" label="1111001010"/>
      <node id="27534" label="1111101000"/>
      <node id="27533" label="0001111000"/>
      <node id="27532" label="0100000100"/>
      <node id="27531" label="0100000110"/>
      <node id="27530" label="0100100100"/>
      <node id="27529" label="0101000100"/>
      <node id="27528" label="0111001000"/>
      <node id="27527" label="0111001010"/>
      <node id="27526" label="0111101000"/>
      <node id="27525" label="1101111000"/>
      <node id="27524" label="0101111000"/>
      <node id="27523" label="0000101000"/>
      <node id="27522" label="0001101000"/>
      <node id="27521" label="0010101000"/>
      <node id="27520" label="1000101000"/>
      <node id="27519" label="1001101000"/>
      <node id="27518" label="1010101000"/>
      <node id="27517" label="1100101000"/>
      <node id="27516" label="1010000110"/>
      <node id="27515" label="1010100100"/>
      <node id="27514" label="1110000100"/>
      <node id="27513" label="0010000110"/>
      <node id="27512" label="0010100100"/>
      <node id="27511" label="0100101000"/>
      <node id="27510" label="1011111000"/>
      <node id="27509" label="1110000110"/>
      <node id="27508" label="1110100100"/>
      <node id="27507" label="0011111000"/>
      <node id="27506" label="0110000100"/>
      <node id="27505" label="0110000110"/>
      <node id="27504" label="0110100100"/>
      <node id="27503" label="1111111000"/>
      <node id="27502" label="0111111000"/>
      <node id="27501" label="1110101000"/>
      <node id="27500" label="0110101000"/>
      <node id="27499" label="1001000110"/>
      <node id="27498" label="1001100100"/>
      <node id="27497" label="1011000100"/>
      <node id="27496" label="0001000110"/>
      <node id="27495" label="0001100100"/>
      <node id="27494" label="0011000100"/>
      <node id="27493" label="1101000110"/>
      <node id="27492" label="1101100100"/>
      <node id="27491" label="0101000110"/>
      <node id="27490" label="0101100100"/>
      <node id="27489" label="1000011010"/>
      <node id="27488" label="1000011100"/>
      <node id="27487" label="0000011010"/>
      <node id="27486" label="0000011100"/>
      <node id="27485" label="0011101000"/>
      <node id="27484" label="1011101000"/>
      <node id="27483" label="1100011010"/>
      <node id="27482" label="1100011100"/>
      <node id="27481" label="1011000110"/>
      <node id="27480" label="1011100100"/>
      <node id="27479" label="1111000100"/>
      <node id="27478" label="0011000110"/>
      <node id="27477" label="0011100100"/>
      <node id="27476" label="0100011010"/>
      <node id="27475" label="0100011100"/>
      <node id="27474" label="1111000110"/>
      <node id="27473" label="1111100100"/>
      <node id="27472" label="0111000100"/>
      <node id="27471" label="0111000110"/>
      <node id="27470" label="0111100100"/>
      <node id="27469" label="1000110100"/>
      <node id="27468" label="1010011010"/>
      <node id="27467" label="1010011100"/>
      <node id="27466" label="0010011010"/>
      <node id="27465" label="0010011100"/>
      <node id="27464" label="0000110100"/>
      <node id="27463" label="1110011010"/>
      <node id="27462" label="1110011100"/>
      <node id="27461" label="1100110100"/>
      <node id="27460" label="0110011010"/>
      <node id="27459" label="0110011100"/>
      <node id="27458" label="0100110100"/>
      <node id="27457" label="1010110100"/>
      <node id="27456" label="0010110100"/>
      <node id="27455" label="1110110100"/>
      <node id="27454" label="1001011010"/>
      <node id="27453" label="1001011100"/>
      <node id="27452" label="0001011010"/>
      <node id="27451" label="0001011100"/>
      <node id="27450" label="0110110100"/>
      <node id="27449" label="1101011010"/>
      <node id="27448" label="1101011100"/>
      <node id="27447" label="0101011010"/>
      <node id="27446" label="0101011100"/>
      <node id="27445" label="1101100010"/>
      <node id="27444" label="1001110100"/>
      <node id="27443" label="1011011010"/>
      <node id="27442" label="1011011100"/>
      <node id="27441" label="0101100010"/>
      <node id="27440" label="0001110100"/>
      <node id="27439" label="0011011010"/>
      <node id="27438" label="0011011100"/>
      <node id="27437" label="0000010100"/>
      <node id="27436" label="0000010110"/>
      <node id="27435" label="0001010100"/>
      <node id="27434" label="0010010100"/>
      <node id="27433" label="1000010100"/>
      <node id="27432" label="1000010110"/>
      <node id="27431" label="1001010100"/>
      <node id="27430" label="1010010100"/>
      <node id="27429" label="1101110100"/>
      <node id="27428" label="0101110100"/>
      <node id="27427" label="0111011010"/>
      <node id="27426" label="0111011100"/>
      <node id="27425" label="1111011010"/>
      <node id="27424" label="1111011100"/>
      <node id="27423" label="0100010100"/>
      <node id="27422" label="0100010110"/>
      <node id="27421" label="0101010100"/>
      <node id="27420" label="1100010100"/>
      <node id="27419" label="1100010110"/>
      <node id="27418" label="1101010100"/>
      <node id="27417" label="1000111100"/>
      <node id="27416" label="0000111100"/>
      <node id="27415" label="1111100010"/>
      <node id="27414" label="1100111100"/>
      <node id="27413" label="1011110100"/>
      <node id="27412" label="0011110100"/>
      <node id="27411" label="0100111100"/>
      <node id="27410" label="0111100010"/>
      <node id="27409" label="0010010110"/>
      <node id="27408" label="1010010110"/>
      <node id="27407" label="1111110100"/>
      <node id="27406" label="0111110100"/>
      <node id="27405" label="0110010100"/>
      <node id="27404" label="0110010110"/>
      <node id="27403" label="1110010100"/>
      <node id="27402" label="1110010110"/>
      <node id="27401" label="1000100010"/>
      <node id="27400" label="1000110010"/>
      <node id="27399" label="1001100010"/>
      <node id="27398" label="1010100010"/>
      <node id="27397" label="1100100010"/>
      <node id="27396" label="0000100010"/>
      <node id="27395" label="0000110010"/>
      <node id="27394" label="0001100010"/>
      <node id="27393" label="0010100010"/>
      <node id="27392" label="1010111100"/>
      <node id="27391" label="1100110010"/>
      <node id="27390" label="0010111100"/>
      <node id="27389" label="0100100010"/>
      <node id="27388" label="0100110010"/>
      <node id="27387" label="0000000001"/>
      <node id="27386" label="0000000011"/>
      <node id="27385" label="0000000101"/>
      <node id="27384" label="0001000001"/>
      <node id="27383" label="1000000001"/>
      <node id="27382" label="1000000011"/>
      <node id="27381" label="1000000101"/>
      <node id="27380" label="1001000001"/>
      <node id="27379" label="1100000001"/>
      <node id="27378" label="1110111100"/>
      <node id="27377" label="0110111100"/>
      <node id="27376" label="1100000011"/>
      <node id="27375" label="1100000101"/>
      <node id="27374" label="1101000001"/>
      <node id="27373" label="0100000001"/>
      <node id="27372" label="0100000011"/>
      <node id="27371" label="0100000101"/>
      <node id="27370" label="0101000001"/>
      <node id="27369" label="0001010110"/>
      <node id="27368" label="0011010100"/>
      <node id="27367" label="1001010110"/>
      <node id="27366" label="1011010100"/>
      <node id="27365" label="1010110010"/>
      <node id="27364" label="1110100010"/>
      <node id="27363" label="0010110010"/>
      <node id="27362" label="0101010110"/>
      <node id="27361" label="1101010110"/>
      <node id="27360" label="1110110010"/>
      <node id="27359" label="1000001100"/>
      <node id="27358" label="1000001110"/>
      <node id="27357" label="1001001100"/>
      <node id="27356" label="1010001100"/>
      <node id="27355" label="1100001100"/>
      <node id="27354" label="0000001100"/>
      <node id="27353" label="0000001110"/>
      <node id="27352" label="0001001100"/>
      <node id="27351" label="0010001100"/>
      <node id="27350" label="0110100010"/>
      <node id="27349" label="0110110010"/>
      <node id="27348" label="1010000001"/>
      <node id="27347" label="1010000011"/>
      <node id="27346" label="1010000101"/>
      <node id="27345" label="1110000001"/>
      <node id="27344" label="0010000001"/>
      <node id="27343" label="0010000011"/>
      <node id="27342" label="0010000101"/>
      <node id="27341" label="1001111100"/>
      <node id="27340" label="1100001110"/>
      <node id="27339" label="1101001100"/>
      <node id="27338" label="0001111100"/>
      <node id="27337" label="0100001100"/>
      <node id="27336" label="0100001110"/>
      <node id="27335" label="0101001100"/>
      <node id="27334" label="1110000011"/>
      <node id="27333" label="1110000101"/>
      <node id="27332" label="0110000001"/>
      <node id="27331" label="0110000011"/>
      <node id="27330" label="0110000101"/>
      <node id="27329" label="1101111100"/>
      <node id="27328" label="0101111100"/>
      <node id="27327" label="0011010110"/>
      <node id="27326" label="1011010110"/>
      <node id="27325" label="0111010100"/>
      <node id="27324" label="0111010110"/>
      <node id="27323" label="1111010100"/>
      <node id="27322" label="1111010110"/>
      <node id="27321" label="1010001110"/>
      <node id="27320" label="1110001100"/>
      <node id="27319" label="1001110010"/>
      <node id="27318" label="1011100010"/>
      <node id="27317" label="0010001110"/>
      <node id="27316" label="0001110010"/>
      <node id="27315" label="0011100010"/>
      <node id="27314" label="0110001100"/>
      <node id="27313" label="0110001110"/>
      <node id="27312" label="0001000011"/>
      <node id="27311" label="0001000101"/>
      <node id="27310" label="1101110010"/>
      <node id="27309" label="0011111100"/>
      <node id="27308" label="1001000011"/>
      <node id="27307" label="1001000101"/>
      <node id="27306" label="1011111100"/>
      <node id="27305" label="1110001110"/>
      <node id="27304" label="0101110010"/>
      <node id="27303" label="1111111100"/>
      <node id="27302" label="0111111100"/>
      <node id="27301" label="1101000011"/>
      <node id="27300" label="1101000101"/>
      <node id="27299" label="1101100001"/>
      <node id="27298" label="0101000011"/>
      <node id="27297" label="0101000101"/>
      <node id="27296" label="0101100001"/>
      <node id="27295" label="1011110010"/>
      <node id="27294" label="0011110010"/>
      <node id="27293" label="0111110010"/>
      <node id="27292" label="1111110010"/>
      <node id="27291" label="1001001110"/>
      <node id="27290" label="1011001100"/>
      <node id="27289" label="0001001110"/>
      <node id="27288" label="0011001100"/>
      <node id="27287" label="0011000001"/>
      <node id="27286" label="0011000011"/>
      <node id="27285" label="0011000101"/>
      <node id="27284" label="1011000001"/>
      <node id="27283" label="1011000011"/>
      <node id="27282" label="1011000101"/>
      <node id="27281" label="1111000001"/>
      <node id="27280" label="1101001110"/>
      <node id="27279" label="1101101100"/>
      <node id="27278" label="0101001110"/>
      <node id="27277" label="0101101100"/>
      <node id="27276" label="1111000011"/>
      <node id="27275" label="1111000101"/>
      <node id="27274" label="1111100001"/>
      <node id="27273" label="0111000001"/>
      <node id="27272" label="0111000011"/>
      <node id="27271" label="0111000101"/>
      <node id="27270" label="0111100001"/>
      <node id="27269" label="0000100001"/>
      <node id="27268" label="0000100101"/>
      <node id="27267" label="0000110001"/>
      <node id="27266" label="0001100001"/>
      <node id="27265" label="0010100001"/>
      <node id="27264" label="1000100001"/>
      <node id="27263" label="1000100101"/>
      <node id="27262" label="1000110001"/>
      <node id="27261" label="1001100001"/>
      <node id="27260" label="1010100001"/>
      <node id="27259" label="1100100001"/>
      <node id="27258" label="1011001110"/>
      <node id="27257" label="1111001100"/>
      <node id="27256" label="0011001110"/>
      <node id="27255" label="1100100101"/>
      <node id="27254" label="1100110001"/>
      <node id="27253" label="0100100001"/>
      <node id="27252" label="0100100101"/>
      <node id="27251" label="0100110001"/>
      <node id="27250" label="1111001110"/>
      <node id="27249" label="1111101100"/>
      <node id="27248" label="0111001100"/>
      <node id="27247" label="0111001110"/>
      <node id="27246" label="0111101100"/>
      <node id="27245" label="0000101100"/>
      <node id="27244" label="0001101100"/>
      <node id="27243" label="0010101100"/>
      <node id="27242" label="1000101100"/>
      <node id="27241" label="1001101100"/>
      <node id="27240" label="1010101100"/>
      <node id="27239" label="1100101100"/>
      <node id="27238" label="0010100101"/>
      <node id="27237" label="0010110001"/>
      <node id="27236" label="1010100101"/>
      <node id="27235" label="1010110001"/>
      <node id="27234" label="1110100001"/>
      <node id="27233" label="1110101100"/>
      <node id="27232" label="0100101100"/>
      <node id="27231" label="0110101100"/>
      <node id="27230" label="1110100101"/>
      <node id="27229" label="1110110001"/>
      <node id="27228" label="0110100001"/>
      <node id="27227" label="0110100101"/>
      <node id="27226" label="0110110001"/>
      <node id="27225" label="1000010001"/>
      <node id="27224" label="1000010011"/>
      <node id="27223" label="1000010101"/>
      <node id="27222" label="1000011001"/>
      <node id="27221" label="1001010001"/>
      <node id="27220" label="0000010001"/>
      <node id="27219" label="0000010011"/>
      <node id="27218" label="0000010101"/>
      <node id="27217" label="0000011001"/>
      <node id="27216" label="0001010001"/>
      <node id="27215" label="0001100101"/>
      <node id="27214" label="0001110001"/>
      <node id="27213" label="0011100001"/>
      <node id="27212" label="1001100101"/>
      <node id="27211" label="1001110001"/>
      <node id="27210" label="1011100001"/>
      <node id="27209" label="1101100101"/>
      <node id="27208" label="1101110001"/>
      <node id="27207" label="1100010001"/>
      <node id="27206" label="1100010011"/>
      <node id="27205" label="1100010101"/>
      <node id="27204" label="1100011001"/>
      <node id="27203" label="1101010001"/>
      <node id="27202" label="0101100101"/>
      <node id="27201" label="0101110001"/>
      <node id="27200" label="0100010001"/>
      <node id="27199" label="0100010011"/>
      <node id="27198" label="0100010101"/>
      <node id="27197" label="0100011001"/>
      <node id="27196" label="0101010001"/>
      <node id="27195" label="1000011110"/>
      <node id="27194" label="1101101010"/>
      <node id="27193" label="1011101100"/>
      <node id="27192" label="1010010001"/>
      <node id="27191" label="1010010011"/>
      <node id="27190" label="1010010101"/>
      <node id="27189" label="1010011001"/>
      <node id="27188" label="0000011110"/>
      <node id="27187" label="0101101010"/>
      <node id="27186" label="1011100101"/>
      <node id="27185" label="1011110001"/>
      <node id="27184" label="0011101100"/>
      <node id="27183" label="0010010001"/>
      <node id="27182" label="0010010011"/>
      <node id="27181" label="0010010101"/>
      <node id="27180" label="0010011001"/>
      <node id="27179" label="0011100101"/>
      <node id="27178" label="0011110001"/>
      <node id="27177" label="1100011110"/>
      <node id="27176" label="0100011110"/>
      <node id="27175" label="1111100101"/>
      <node id="27174" label="1111110001"/>
      <node id="27173" label="1110010001"/>
      <node id="27172" label="1110010011"/>
      <node id="27171" label="1110010101"/>
      <node id="27170" label="1110011001"/>
      <node id="27169" label="0111100101"/>
      <node id="27168" label="0111110001"/>
      <node id="27167" label="0110010001"/>
      <node id="27166" label="0110010011"/>
      <node id="27165" label="0110010101"/>
      <node id="27164" label="0110011001"/>
      <node id="27163" label="1000100110"/>
      <node id="27162" label="0000100110"/>
      <node id="27161" label="0010011110"/>
      <node id="27160" label="1010011110"/>
      <node id="27159" label="0111101010"/>
      <node id="27158" label="1100100110"/>
      <node id="27157" label="1111101010"/>
      <node id="27156" label="0100100110"/>
      <node id="27155" label="1110011110"/>
      <node id="27154" label="0110011110"/>
      <node id="27153" label="1001010011"/>
      <node id="27152" label="1001010101"/>
      <node id="27151" label="1001011001"/>
      <node id="27150" label="0001010011"/>
      <node id="27149" label="0001010101"/>
      <node id="27148" label="0001011001"/>
      <node id="27147" label="0000101010"/>
      <node id="27146" label="0000111010"/>
      <node id="27145" label="0001101010"/>
      <node id="27144" label="0010101010"/>
      <node id="27143" label="1000101010"/>
      <node id="27142" label="1000111010"/>
      <node id="27141" label="1001101010"/>
      <node id="27140" label="1010101010"/>
      <node id="27139" label="1100101010"/>
      <node id="27138" label="1101010011"/>
      <node id="27137" label="1101010101"/>
      <node id="27136" label="1101011001"/>
      <node id="27135" label="0101010011"/>
      <node id="27134" label="0101010101"/>
      <node id="27133" label="0101011001"/>
      <node id="27132" label="1010100110"/>
      <node id="27131" label="1100111010"/>
      <node id="27130" label="0010100110"/>
      <node id="27129" label="0100101010"/>
      <node id="27128" label="0100111010"/>
      <node id="27127" label="1000001001"/>
      <node id="27126" label="1000001011"/>
      <node id="27125" label="1000001101"/>
      <node id="27124" label="1001001001"/>
      <node id="27123" label="1100001001"/>
      <node id="27122" label="0000001001"/>
      <node id="27121" label="0000001011"/>
      <node id="27120" label="0000001101"/>
      <node id="27119" label="0001001001"/>
      <node id="27118" label="1110100110"/>
      <node id="27117" label="0110100110"/>
      <node id="27116" label="1100001011"/>
      <node id="27115" label="1100001101"/>
      <node id="27114" label="1101001001"/>
      <node id="27113" label="0100001001"/>
      <node id="27112" label="0100001011"/>
      <node id="27111" label="0100001101"/>
      <node id="27110" label="0101001001"/>
      <node id="27109" label="1001011110"/>
      <node id="27108" label="0001011110"/>
      <node id="27107" label="1011010001"/>
      <node id="27106" label="1011010011"/>
      <node id="27105" label="1011010101"/>
      <node id="27104" label="1011011001"/>
      <node id="27103" label="0011010001"/>
      <node id="27102" label="0011010011"/>
      <node id="27101" label="0011010101"/>
      <node id="27100" label="0011011001"/>
      <node id="27099" label="1101011110"/>
      <node id="27098" label="0010111010"/>
      <node id="27097" label="0101011110"/>
      <node id="27096" label="1010111010"/>
      <node id="27095" label="1110101010"/>
      <node id="27094" label="0111010001"/>
      <node id="27093" label="0111010011"/>
      <node id="27092" label="0111010101"/>
      <node id="27091" label="0111011001"/>
      <node id="27090" label="1111010001"/>
      <node id="27089" label="1111010011"/>
      <node id="27088" label="1111010101"/>
      <node id="27087" label="1111011001"/>
      <node id="27086" label="1110111010"/>
      <node id="27085" label="0110101010"/>
      <node id="27084" label="0110111010"/>
      <node id="27083" label="1010001001"/>
      <node id="27082" label="1010001011"/>
      <node id="27081" label="1010001101"/>
      <node id="27080" label="1110001001"/>
      <node id="27079" label="0010001001"/>
      <node id="27078" label="0010001011"/>
      <node id="27077" label="0010001101"/>
      <node id="27076" label="1001100110"/>
      <node id="27075" label="0001100110"/>
      <node id="27074" label="1110001011"/>
      <node id="27073" label="1110001101"/>
      <node id="27072" label="1000110101"/>
      <node id="27071" label="1000111001"/>
      <node id="27070" label="0110001001"/>
      <node id="27069" label="0110001011"/>
      <node id="27068" label="0110001101"/>
      <node id="27067" label="0000110101"/>
      <node id="27066" label="0000111001"/>
      <node id="27065" label="1011011110"/>
      <node id="27064" label="1101100110"/>
      <node id="27063" label="0011011110"/>
      <node id="27062" label="0101100110"/>
      <node id="27061" label="1100110101"/>
      <node id="27060" label="1100111001"/>
      <node id="27059" label="0100110101"/>
      <node id="27058" label="0100111001"/>
      <node id="27057" label="0111011110"/>
      <node id="27056" label="1111011110"/>
      <node id="27055" label="0001111010"/>
      <node id="27054" label="0011101010"/>
      <node id="27053" label="1001111010"/>
      <node id="27052" label="1011101010"/>
      <node id="27051" label="1101111010"/>
      <node id="27050" label="1010110101"/>
      <node id="27049" label="1010111001"/>
      <node id="27048" label="1011100110"/>
      <node id="27047" label="0010110101"/>
      <node id="27046" label="0010111001"/>
      <node id="27045" label="1001001011"/>
      <node id="27044" label="1001001101"/>
      <node id="27043" label="0011100110"/>
      <node id="27042" label="0001001011"/>
      <node id="27041" label="0001001101"/>
      <node id="27040" label="0101111010"/>
      <node id="27039" label="1111100110"/>
      <node id="27038" label="0111100110"/>
      <node id="27037" label="1101001011"/>
      <node id="27036" label="1101001101"/>
      <node id="27035" label="1101101001"/>
      <node id="27034" label="1110110101"/>
      <node id="27033" label="1110111001"/>
      <node id="27032" label="0101001011"/>
      <node id="27031" label="0101001101"/>
      <node id="27030" label="0101101001"/>
      <node id="27029" label="0110110101"/>
      <node id="27028" label="0110111001"/>
      <node id="27027" label="1000110110"/>
      <node id="27026" label="0000110110"/>
      <node id="27025" label="0011111010"/>
      <node id="27024" label="1011111010"/>
      <node id="27023" label="1100110110"/>
      <node id="27022" label="1111111010"/>
      <node id="27021" label="1000000111"/>
      <node id="27020" label="0111111010"/>
      <node id="27019" label="1011001001"/>
      <node id="27018" label="1011001011"/>
      <node id="27017" label="1011001101"/>
      <node id="27016" label="1111001001"/>
      <node id="27015" label="0000000111"/>
      <node id="27014" label="0100110110"/>
      <node id="27013" label="0011001001"/>
      <node id="27012" label="0011001011"/>
      <node id="27011" label="0011001101"/>
      <node id="27010" label="1100000111"/>
      <node id="27009" label="1001110101"/>
      <node id="27008" label="1001111001"/>
      <node id="27007" label="1111001011"/>
      <node id="27006" label="1111001101"/>
      <node id="27005" label="1111101001"/>
      <node id="27004" label="0100000111"/>
      <node id="27003" label="0001110101"/>
      <node id="27002" label="0001111001"/>
      <node id="27001" label="0111001001"/>
      <node id="27000" label="0111001011"/>
      <node id="26999" label="0111001101"/>
      <node id="26998" label="0111101001"/>
      <node id="26997" label="1101110101"/>
      <node id="26996" label="1101111001"/>
      <node id="26995" label="0101110101"/>
      <node id="26994" label="0101111001"/>
      <node id="26993" label="1010110110"/>
      <node id="26992" label="0010110110"/>
      <node id="26991" label="0000101001"/>
      <node id="26990" label="0000101101"/>
      <node id="26989" label="0001101001"/>
      <node id="26988" label="0010101001"/>
      <node id="26987" label="1000101001"/>
      <node id="26986" label="1000101101"/>
      <node id="26985" label="1001101001"/>
      <node id="26984" label="1010101001"/>
      <node id="26983" label="1100101001"/>
      <node id="26982" label="1110110110"/>
      <node id="26981" label="0110110110"/>
      <node id="26980" label="0010000111"/>
      <node id="26979" label="1010000111"/>
      <node id="26978" label="1100101101"/>
      <node id="26977" label="0100101001"/>
      <node id="26976" label="0100101101"/>
      <node id="26975" label="1110000111"/>
      <node id="26974" label="1011110101"/>
      <node id="26973" label="1011111001"/>
      <node id="26972" label="0110000111"/>
      <node id="26971" label="0011110101"/>
      <node id="26970" label="0011111001"/>
      <node id="26969" label="1111110101"/>
      <node id="26968" label="1111111001"/>
      <node id="26967" label="0111110101"/>
      <node id="26966" label="0111111001"/>
      <node id="26965" label="0010101101"/>
      <node id="26964" label="1010101101"/>
      <node id="26963" label="1110101001"/>
      <node id="26962" label="1001110110"/>
      <node id="26961" label="0001110110"/>
      <node id="26960" label="1110101101"/>
      <node id="26959" label="0110101001"/>
      <node id="26958" label="0110101101"/>
      <node id="26957" label="0001000111"/>
      <node id="26956" label="1101110110"/>
      <node id="26955" label="1001000111"/>
      <node id="26954" label="0101110110"/>
      <node id="26953" label="1101000111"/>
      <node id="26952" label="0101000111"/>
      <node id="26951" label="1000111110"/>
      <node id="26950" label="0000111110"/>
      <node id="26949" label="1011110110"/>
      <node id="26948" label="1100111110"/>
      <node id="26947" label="0011110110"/>
      <node id="26946" label="0100111110"/>
      <node id="26945" label="0001101101"/>
      <node id="26944" label="0011101001"/>
      <node id="26943" label="1000011011"/>
      <node id="26942" label="1000011101"/>
      <node id="26941" label="0000011011"/>
      <node id="26940" label="0000011101"/>
      <node id="26939" label="1001101101"/>
      <node id="26938" label="1011101001"/>
      <node id="26937" label="1100011011"/>
      <node id="26936" label="1100011101"/>
      <node id="26935" label="0111110110"/>
      <node id="26934" label="1111110110"/>
      <node id="26933" label="0011000111"/>
      <node id="26932" label="1011000111"/>
      <node id="26931" label="1101101101"/>
      <node id="26930" label="0101101101"/>
      <node id="26929" label="0100011011"/>
      <node id="26928" label="0100011101"/>
      <node id="26927" label="1111000111"/>
      <node id="26926" label="0111000111"/>
      <node id="26925" label="1010111110"/>
      <node id="26924" label="0010111110"/>
      <node id="26923" label="0110111110"/>
      <node id="26922" label="1110111110"/>
      <node id="26921" label="1010011011"/>
      <node id="26920" label="1010011101"/>
      <node id="26919" label="0011101101"/>
      <node id="26918" label="0010011011"/>
      <node id="26917" label="0010011101"/>
      <node id="26916" label="1011101101"/>
      <node id="26915" label="1110011011"/>
      <node id="26914" label="1110011101"/>
      <node id="26913" label="1111101101"/>
      <node id="26912" label="0110011011"/>
      <node id="26911" label="0110011101"/>
      <node id="26910" label="0111101101"/>
      <node id="26909" label="1001111110"/>
      <node id="26908" label="0001111110"/>
      <node id="26907" label="1101111110"/>
      <node id="26906" label="0101111110"/>
      <node id="26905" label="1001011011"/>
      <node id="26904" label="1001011101"/>
      <node id="26903" label="0001011011"/>
      <node id="26902" label="0001011101"/>
      <node id="26901" label="1101011011"/>
      <node id="26900" label="1101011101"/>
      <node id="26899" label="0101011011"/>
      <node id="26898" label="0101011101"/>
      <node id="26897" label="1011111110"/>
      <node id="26896" label="0011111110"/>
      <node id="26895" label="1111111110"/>
      <node id="26894" label="0111111110"/>
      <node id="26893" label="1000010111"/>
      <node id="26892" label="0011011011"/>
      <node id="26891" label="0011011101"/>
      <node id="26890" label="0000010111"/>
      <node id="26889" label="0101100011"/>
      <node id="26888" label="1011011011"/>
      <node id="26887" label="1011011101"/>
      <node id="26886" label="1101100011"/>
      <node id="26885" label="1100010111"/>
      <node id="26884" label="0100010111"/>
      <node id="26883" label="0111011011"/>
      <node id="26882" label="0111011101"/>
      <node id="26881" label="1111011011"/>
      <node id="26880" label="1111011101"/>
      <node id="26879" label="1000111101"/>
      <node id="26878" label="0000111101"/>
      <node id="26877" label="1010010111"/>
      <node id="26876" label="1101101110"/>
      <node id="26875" label="0101101110"/>
      <node id="26874" label="0111100011"/>
      <node id="26873" label="1100111101"/>
      <node id="26872" label="0100111101"/>
      <node id="26871" label="0010010111"/>
      <node id="26870" label="1111100011"/>
      <node id="26869" label="1110010111"/>
      <node id="26868" label="0110010111"/>
      <node id="26867" label="0000100011"/>
      <node id="26866" label="0000100111"/>
      <node id="26865" label="0000110011"/>
      <node id="26864" label="0001100011"/>
      <node id="26863" label="0010100011"/>
      <node id="26862" label="1000100011"/>
      <node id="26861" label="1000100111"/>
      <node id="26860" label="1000110011"/>
      <node id="26859" label="1001100011"/>
      <node id="26858" label="1010100011"/>
      <node id="26857" label="1100100011"/>
      <node id="26856" label="1010111101"/>
      <node id="26855" label="1100100111"/>
      <node id="26854" label="1100110011"/>
      <node id="26853" label="0010111101"/>
      <node id="26852" label="0100100011"/>
      <node id="26851" label="0100100111"/>
      <node id="26850" label="0100110011"/>
      <node id="26849" label="1111101110"/>
      <node id="26848" label="0111101110"/>
      <node id="26847" label="1110111101"/>
      <node id="26846" label="0110111101"/>
      <node id="26845" label="1001010111"/>
      <node id="26844" label="0001010111"/>
      <node id="26843" label="0000101110"/>
      <node id="26842" label="0001101110"/>
      <node id="26841" label="0010101110"/>
      <node id="26840" label="1000101110"/>
      <node id="26839" label="1001101110"/>
      <node id="26838" label="1010101110"/>
      <node id="26837" label="1100101110"/>
      <node id="26836" label="1101010111"/>
      <node id="26835" label="0010100111"/>
      <node id="26834" label="0010110011"/>
      <node id="26833" label="0101010111"/>
      <node id="26832" label="1010100111"/>
      <node id="26831" label="1010110011"/>
      <node id="26830" label="1110100011"/>
      <node id="26829" label="1110101110"/>
      <node id="26828" label="0100101110"/>
      <node id="26827" label="0110101110"/>
      <node id="26826" label="0000001111"/>
      <node id="26825" label="1000001111"/>
      <node id="26824" label="1110100111"/>
      <node id="26823" label="1110110011"/>
      <node id="26822" label="0110100011"/>
      <node id="26821" label="0110100111"/>
      <node id="26820" label="0110110011"/>
      <node id="26819" label="1100001111"/>
      <node id="26818" label="1001111101"/>
      <node id="26817" label="0100001111"/>
      <node id="26816" label="0001111101"/>
      <node id="26815" label="1101111101"/>
      <node id="26814" label="1011010111"/>
      <node id="26813" label="0101111101"/>
      <node id="26812" label="0011010111"/>
      <node id="26811" label="0111010111"/>
      <node id="26810" label="1111010111"/>
      <node id="26809" label="0010001111"/>
      <node id="26808" label="1010001111"/>
      <node id="26807" label="0001100111"/>
      <node id="26806" label="0001110011"/>
      <node id="26805" label="0011100011"/>
      <node id="26804" label="1001100111"/>
      <node id="26803" label="1001110011"/>
      <node id="26802" label="1011100011"/>
      <node id="26801" label="1011111101"/>
      <node id="26800" label="1110001111"/>
      <node id="26799" label="0011111101"/>
      <node id="26798" label="1101100111"/>
      <node id="26797" label="1101110011"/>
      <node id="26796" label="0110001111"/>
      <node id="26795" label="0101100111"/>
      <node id="26794" label="0101110011"/>
      <node id="26793" label="1111111101"/>
      <node id="26792" label="0111111101"/>
      <node id="26791" label="0011101110"/>
      <node id="26790" label="1011101110"/>
      <node id="26789" label="0011100111"/>
      <node id="26788" label="0011110011"/>
      <node id="26787" label="1011100111"/>
      <node id="26786" label="1011110011"/>
      <node id="26785" label="1111100111"/>
      <node id="26784" label="1111110011"/>
      <node id="26783" label="1001001111"/>
      <node id="26782" label="0111100111"/>
      <node id="26781" label="0111110011"/>
      <node id="26780" label="0001001111"/>
      <node id="26779" label="1101001111"/>
      <node id="26778" label="0101001111"/>
      <node id="26777" label="0011001111"/>
      <node id="26776" label="1011001111"/>
      <node id="26775" label="1111001111"/>
      <node id="26774" label="0111001111"/>
      <node id="26773" label="1000110111"/>
      <node id="26772" label="0000110111"/>
      <node id="26771" label="1100110111"/>
      <node id="26770" label="0100110111"/>
      <node id="26769" label="1010110111"/>
      <node id="26768" label="0010110111"/>
      <node id="26767" label="0000011111"/>
      <node id="26766" label="1000011111"/>
      <node id="26765" label="1101101011"/>
      <node id="26764" label="1110110111"/>
      <node id="26763" label="0110110111"/>
      <node id="26762" label="0101101011"/>
      <node id="26761" label="1100011111"/>
      <node id="26760" label="0100011111"/>
      <node id="26759" label="0010011111"/>
      <node id="26758" label="1010011111"/>
      <node id="26757" label="1001110111"/>
      <node id="26756" label="1111101011"/>
      <node id="26755" label="0111101011"/>
      <node id="26754" label="0001110111"/>
      <node id="26753" label="1110011111"/>
      <node id="26752" label="1101110111"/>
      <node id="26751" label="0110011111"/>
      <node id="26750" label="0101110111"/>
      <node id="26749" label="0000101011"/>
      <node id="26748" label="0000101111"/>
      <node id="26747" label="0000111011"/>
      <node id="26746" label="0001101011"/>
      <node id="26745" label="0010101011"/>
      <node id="26744" label="1000101011"/>
      <node id="26743" label="1000101111"/>
      <node id="26742" label="1000111011"/>
      <node id="26741" label="1001101011"/>
      <node id="26740" label="1010101011"/>
      <node id="26739" label="1100101011"/>
      <node id="26738" label="1100101111"/>
      <node id="26737" label="1100111011"/>
      <node id="26736" label="0100101011"/>
      <node id="26735" label="0100101111"/>
      <node id="26734" label="0100111011"/>
      <node id="26733" label="1011110111"/>
      <node id="26732" label="0011110111"/>
      <node id="26731" label="0001011111"/>
      <node id="26730" label="1001011111"/>
      <node id="26729" label="1111110111"/>
      <node id="26728" label="0111110111"/>
      <node id="26727" label="1101011111"/>
      <node id="26726" label="0101011111"/>
      <node id="26725" label="0010101111"/>
      <node id="26724" label="0010111011"/>
      <node id="26723" label="1010101111"/>
      <node id="26722" label="1010111011"/>
      <node id="26721" label="1110101011"/>
      <node id="26720" label="1110101111"/>
      <node id="26719" label="1110111011"/>
      <node id="26718" label="0110101011"/>
      <node id="26717" label="0110101111"/>
      <node id="26716" label="0110111011"/>
      <node id="26715" label="0011011111"/>
      <node id="26714" label="1011011111"/>
      <node id="26713" label="0111011111"/>
      <node id="26712" label="1111011111"/>
      <node id="26711" label="0001101111"/>
      <node id="26710" label="0001111011"/>
      <node id="26709" label="0011101011"/>
      <node id="26708" label="1001101111"/>
      <node id="26707" label="1001111011"/>
      <node id="26706" label="1011101011"/>
      <node id="26705" label="1101101111"/>
      <node id="26704" label="1101111011"/>
      <node id="26703" label="0101101111"/>
      <node id="26702" label="0101111011"/>
      <node id="26701" label="0011101111"/>
      <node id="26700" label="0011111011"/>
      <node id="26699" label="1011101111"/>
      <node id="26698" label="1011111011"/>
      <node id="26697" label="1111101111"/>
      <node id="26696" label="1111111011"/>
      <node id="26695" label="0111101111"/>
      <node id="26694" label="0111111011"/>
      <node id="26693" label="1000111111"/>
      <node id="26692" label="0000111111"/>
      <node id="26691" label="1100111111"/>
      <node id="26690" label="0100111111"/>
      <node id="26689" label="1010111111"/>
      <node id="26688" label="0010111111"/>
      <node id="26687" label="1110111111"/>
      <node id="26686" label="0110111111"/>
      <node id="26685" label="1001111111"/>
      <node id="26684" label="0001111111"/>
      <node id="26683" label="1101111111"/>
      <node id="26682" label="0101111111"/>
      <node id="26681" label="1011111111"/>
      <node id="26680" label="0011111111"/>
      <node id="26679" label="1111111111"/>
      <node id="26678" label="0111111111"/>
      <edge id="31797" label="0000000000 (1) 0000000010" source="27701" target="27700" cy:directed="1"/>
      <edge id="31796" label="0000000000 (1) 0001000000" source="27701" target="27699" cy:directed="1"/>
      <edge id="31795" label="0000000010 (1) 0001000010" source="27700" target="27681" cy:directed="1"/>
      <edge id="31794" label="0001000000 (1) 0001000010" source="27699" target="27681" cy:directed="1"/>
      <edge id="31793" label="1000000000 (1) 1000000010" source="27698" target="27697" cy:directed="1"/>
      <edge id="31792" label="1000000000 (1) 1001000000" source="27698" target="27696" cy:directed="1"/>
      <edge id="31791" label="1000000000 (1) 1100000000" source="27698" target="27695" cy:directed="1"/>
      <edge id="31790" label="1000000010 (1) 1001000010" source="27697" target="27680" cy:directed="1"/>
      <edge id="31789" label="1000000010 (1) 1100000010" source="27697" target="27694" cy:directed="1"/>
      <edge id="31788" label="1001000000 (1) 1001000010" source="27696" target="27680" cy:directed="1"/>
      <edge id="31787" label="1001000000 (1) 1101000000" source="27696" target="27693" cy:directed="1"/>
      <edge id="31786" label="1100000000 (1) 1100000010" source="27695" target="27694" cy:directed="1"/>
      <edge id="31785" label="1100000000 (1) 1101000000" source="27695" target="27693" cy:directed="1"/>
      <edge id="31784" label="1100000010 (1) 1101000010" source="27694" target="27679" cy:directed="1"/>
      <edge id="31783" label="1101000000 (1) 1101000010" source="27693" target="27679" cy:directed="1"/>
      <edge id="31782" label="1101000000 (1) 1101100000" source="27693" target="27678" cy:directed="1"/>
      <edge id="31781" label="0100000000 (1) 0100000010" source="27692" target="27691" cy:directed="1"/>
      <edge id="31780" label="0100000000 (1) 0101000000" source="27692" target="27690" cy:directed="1"/>
      <edge id="31779" label="0100000000 (1) 0000000000" source="27692" target="27701" cy:directed="1"/>
      <edge id="31778" label="0100000010 (1) 0101000010" source="27691" target="27677" cy:directed="1"/>
      <edge id="31777" label="0100000010 (1) 0000000010" source="27691" target="27700" cy:directed="1"/>
      <edge id="31776" label="0101000000 (1) 0101000010" source="27690" target="27677" cy:directed="1"/>
      <edge id="31775" label="0101000000 (1) 0101100000" source="27690" target="27676" cy:directed="1"/>
      <edge id="31774" label="0101000000 (1) 0001000000" source="27690" target="27699" cy:directed="1"/>
      <edge id="31773" label="1010000000 (1) 1010000010" source="27689" target="27688" cy:directed="1"/>
      <edge id="31772" label="1010000000 (1) 1000000000" source="27689" target="27698" cy:directed="1"/>
      <edge id="31771" label="1010000000 (1) 1110000000" source="27689" target="27687" cy:directed="1"/>
      <edge id="31770" label="1010000010 (1) 1000000010" source="27688" target="27697" cy:directed="1"/>
      <edge id="31769" label="1010000010 (1) 1110000010" source="27688" target="27684" cy:directed="1"/>
      <edge id="31768" label="1110000000 (1) 1110000010" source="27687" target="27684" cy:directed="1"/>
      <edge id="31767" label="1110000000 (1) 1100000000" source="27687" target="27695" cy:directed="1"/>
      <edge id="31766" label="0010000000 (1) 0010000010" source="27686" target="27685" cy:directed="1"/>
      <edge id="31765" label="0010000000 (1) 0000000000" source="27686" target="27701" cy:directed="1"/>
      <edge id="31764" label="0010000010 (1) 0000000010" source="27685" target="27700" cy:directed="1"/>
      <edge id="31763" label="1110000010 (1) 1100000010" source="27684" target="27694" cy:directed="1"/>
      <edge id="31762" label="0110000000 (1) 0110000010" source="27683" target="27682" cy:directed="1"/>
      <edge id="31761" label="0110000000 (1) 0100000000" source="27683" target="27692" cy:directed="1"/>
      <edge id="31760" label="0110000000 (1) 0010000000" source="27683" target="27686" cy:directed="1"/>
      <edge id="31759" label="0110000010 (1) 0100000010" source="27682" target="27691" cy:directed="1"/>
      <edge id="31758" label="0110000010 (1) 0010000010" source="27682" target="27685" cy:directed="1"/>
      <edge id="31757" label="1001000010 (1) 1101000010" source="27680" target="27679" cy:directed="1"/>
      <edge id="31756" label="1101000010 (1) 1101100010" source="27679" target="27445" cy:directed="1"/>
      <edge id="31755" label="1101100000 (1) 1101110000" source="27678" target="27635" cy:directed="1"/>
      <edge id="31754" label="0101000010 (1) 0101100010" source="27677" target="27441" cy:directed="1"/>
      <edge id="31753" label="0101000010 (1) 0001000010" source="27677" target="27681" cy:directed="1"/>
      <edge id="31752" label="0101100000 (1) 0101110000" source="27676" target="27630" cy:directed="1"/>
      <edge id="31751" label="0101100000 (1) 0001100000" source="27676" target="27658" cy:directed="1"/>
      <edge id="31750" label="1011000000 (1) 1011000010" source="27675" target="27674" cy:directed="1"/>
      <edge id="31749" label="1011000000 (1) 1010000000" source="27675" target="27689" cy:directed="1"/>
      <edge id="31748" label="1011000000 (1) 1001000000" source="27675" target="27696" cy:directed="1"/>
      <edge id="31747" label="1011000000 (1) 1111000000" source="27675" target="27673" cy:directed="1"/>
      <edge id="31746" label="1011000010 (1) 1010000010" source="27674" target="27688" cy:directed="1"/>
      <edge id="31745" label="1011000010 (1) 1001000010" source="27674" target="27680" cy:directed="1"/>
      <edge id="31744" label="1011000010 (1) 1111000010" source="27674" target="27670" cy:directed="1"/>
      <edge id="31743" label="1111000000 (1) 1111000010" source="27673" target="27670" cy:directed="1"/>
      <edge id="31742" label="1111000000 (1) 1111100000" source="27673" target="27669" cy:directed="1"/>
      <edge id="31741" label="1111000000 (1) 1110000000" source="27673" target="27687" cy:directed="1"/>
      <edge id="31740" label="1111000000 (1) 1101000000" source="27673" target="27693" cy:directed="1"/>
      <edge id="31739" label="0011000000 (1) 0011000010" source="27672" target="27671" cy:directed="1"/>
      <edge id="31738" label="0011000000 (1) 0010000000" source="27672" target="27686" cy:directed="1"/>
      <edge id="31737" label="0011000000 (1) 0001000000" source="27672" target="27699" cy:directed="1"/>
      <edge id="31736" label="0011000010 (1) 0010000010" source="27671" target="27685" cy:directed="1"/>
      <edge id="31735" label="0011000010 (1) 0001000010" source="27671" target="27681" cy:directed="1"/>
      <edge id="31734" label="1111000010 (1) 1111100010" source="27670" target="27415" cy:directed="1"/>
      <edge id="31733" label="1111000010 (1) 1110000010" source="27670" target="27684" cy:directed="1"/>
      <edge id="31732" label="1111000010 (1) 1101000010" source="27670" target="27679" cy:directed="1"/>
      <edge id="31731" label="1111100000 (1) 1111110000" source="27669" target="27617" cy:directed="1"/>
      <edge id="31730" label="1111100000 (1) 1110100000" source="27669" target="27652" cy:directed="1"/>
      <edge id="31729" label="1111100000 (1) 1101100000" source="27669" target="27678" cy:directed="1"/>
      <edge id="31728" label="0111000000 (1) 0111000010" source="27668" target="27667" cy:directed="1"/>
      <edge id="31727" label="0111000000 (1) 0111100000" source="27668" target="27666" cy:directed="1"/>
      <edge id="31726" label="0111000000 (1) 0110000000" source="27668" target="27683" cy:directed="1"/>
      <edge id="31725" label="0111000000 (1) 0101000000" source="27668" target="27690" cy:directed="1"/>
      <edge id="31724" label="0111000000 (1) 0011000000" source="27668" target="27672" cy:directed="1"/>
      <edge id="31723" label="0111000010 (1) 0111100010" source="27667" target="27410" cy:directed="1"/>
      <edge id="31722" label="0111000010 (1) 0110000010" source="27667" target="27682" cy:directed="1"/>
      <edge id="31721" label="0111000010 (1) 0101000010" source="27667" target="27677" cy:directed="1"/>
      <edge id="31720" label="0111000010 (1) 0011000010" source="27667" target="27671" cy:directed="1"/>
      <edge id="31719" label="0111100000 (1) 0111110000" source="27666" target="27613" cy:directed="1"/>
      <edge id="31718" label="0111100000 (1) 0110100000" source="27666" target="27649" cy:directed="1"/>
      <edge id="31717" label="0111100000 (1) 0101100000" source="27666" target="27676" cy:directed="1"/>
      <edge id="31716" label="0111100000 (1) 0011100000" source="27666" target="27640" cy:directed="1"/>
      <edge id="31715" label="1000100000 (1) 1000110000" source="27665" target="27664" cy:directed="1"/>
      <edge id="31714" label="1000100000 (1) 1000000000" source="27665" target="27698" cy:directed="1"/>
      <edge id="31713" label="1000100000 (1) 1001100000" source="27665" target="27663" cy:directed="1"/>
      <edge id="31712" label="1000100000 (1) 1010100000" source="27665" target="27662" cy:directed="1"/>
      <edge id="31711" label="1000100000 (1) 1100100000" source="27665" target="27661" cy:directed="1"/>
      <edge id="31710" label="1000110000 (1) 1000111000" source="27664" target="27572" cy:directed="1"/>
      <edge id="31709" label="1000110000 (1) 1000010000" source="27664" target="27645" cy:directed="1"/>
      <edge id="31708" label="1000110000 (1) 1001110000" source="27664" target="27647" cy:directed="1"/>
      <edge id="31707" label="1000110000 (1) 1010110000" source="27664" target="27653" cy:directed="1"/>
      <edge id="31706" label="1001100000 (1) 1001110000" source="27663" target="27647" cy:directed="1"/>
      <edge id="31705" label="1001100000 (1) 1001000000" source="27663" target="27696" cy:directed="1"/>
      <edge id="31704" label="1001100000 (1) 1011100000" source="27663" target="27646" cy:directed="1"/>
      <edge id="31703" label="1001100000 (1) 1101100000" source="27663" target="27678" cy:directed="1"/>
      <edge id="31702" label="1010100000 (1) 1010110000" source="27662" target="27653" cy:directed="1"/>
      <edge id="31701" label="1010100000 (1) 1010000000" source="27662" target="27689" cy:directed="1"/>
      <edge id="31700" label="1010100000 (1) 1110100000" source="27662" target="27652" cy:directed="1"/>
      <edge id="31699" label="1100100000 (1) 1100110000" source="27661" target="27656" cy:directed="1"/>
      <edge id="31698" label="1100100000 (1) 1100000000" source="27661" target="27695" cy:directed="1"/>
      <edge id="31697" label="1100100000 (1) 1101100000" source="27661" target="27678" cy:directed="1"/>
      <edge id="31696" label="0000100000 (1) 0000110000" source="27660" target="27659" cy:directed="1"/>
      <edge id="31695" label="0000100000 (1) 0000000000" source="27660" target="27701" cy:directed="1"/>
      <edge id="31694" label="0000100000 (1) 0001100000" source="27660" target="27658" cy:directed="1"/>
      <edge id="31693" label="0000100000 (1) 0010100000" source="27660" target="27657" cy:directed="1"/>
      <edge id="31692" label="0000110000 (1) 0000111000" source="27659" target="27570" cy:directed="1"/>
      <edge id="31691" label="0000110000 (1) 0000010000" source="27659" target="27639" cy:directed="1"/>
      <edge id="31690" label="0000110000 (1) 0001110000" source="27659" target="27641" cy:directed="1"/>
      <edge id="31689" label="0000110000 (1) 0010110000" source="27659" target="27651" cy:directed="1"/>
      <edge id="31688" label="0001100000 (1) 0001110000" source="27658" target="27641" cy:directed="1"/>
      <edge id="31687" label="0001100000 (1) 0001000000" source="27658" target="27699" cy:directed="1"/>
      <edge id="31686" label="0001100000 (1) 0011100000" source="27658" target="27640" cy:directed="1"/>
      <edge id="31685" label="0010100000 (1) 0010110000" source="27657" target="27651" cy:directed="1"/>
      <edge id="31684" label="0010100000 (1) 0010000000" source="27657" target="27686" cy:directed="1"/>
      <edge id="31683" label="1100110000 (1) 1100111000" source="27656" target="27567" cy:directed="1"/>
      <edge id="31682" label="1100110000 (1) 1100010000" source="27656" target="27634" cy:directed="1"/>
      <edge id="31681" label="1100110000 (1) 1101110000" source="27656" target="27635" cy:directed="1"/>
      <edge id="31680" label="1100110000 (1) 1000110000" source="27656" target="27664" cy:directed="1"/>
      <edge id="31679" label="0100100000 (1) 0100110000" source="27655" target="27654" cy:directed="1"/>
      <edge id="31678" label="0100100000 (1) 0100000000" source="27655" target="27692" cy:directed="1"/>
      <edge id="31677" label="0100100000 (1) 0101100000" source="27655" target="27676" cy:directed="1"/>
      <edge id="31676" label="0100100000 (1) 0000100000" source="27655" target="27660" cy:directed="1"/>
      <edge id="31675" label="0100110000 (1) 0100111000" source="27654" target="27566" cy:directed="1"/>
      <edge id="31674" label="0100110000 (1) 0100010000" source="27654" target="27629" cy:directed="1"/>
      <edge id="31673" label="0100110000 (1) 0101110000" source="27654" target="27630" cy:directed="1"/>
      <edge id="31672" label="0100110000 (1) 0000110000" source="27654" target="27659" cy:directed="1"/>
      <edge id="31671" label="1010110000 (1) 1010111000" source="27653" target="27565" cy:directed="1"/>
      <edge id="31670" label="1010110000 (1) 1010010000" source="27653" target="27624" cy:directed="1"/>
      <edge id="31669" label="1110100000 (1) 1110110000" source="27652" target="27650" cy:directed="1"/>
      <edge id="31668" label="1110100000 (1) 1110000000" source="27652" target="27687" cy:directed="1"/>
      <edge id="31667" label="1110100000 (1) 1100100000" source="27652" target="27661" cy:directed="1"/>
      <edge id="31666" label="0010110000 (1) 0010111000" source="27651" target="27563" cy:directed="1"/>
      <edge id="31665" label="0010110000 (1) 0010010000" source="27651" target="27620" cy:directed="1"/>
      <edge id="31664" label="1110110000 (1) 1110111000" source="27650" target="27561" cy:directed="1"/>
      <edge id="31663" label="1110110000 (1) 1110010000" source="27650" target="27616" cy:directed="1"/>
      <edge id="31662" label="1110110000 (1) 1100110000" source="27650" target="27656" cy:directed="1"/>
      <edge id="31661" label="1110110000 (1) 1010110000" source="27650" target="27653" cy:directed="1"/>
      <edge id="31660" label="0110100000 (1) 0110110000" source="27649" target="27648" cy:directed="1"/>
      <edge id="31659" label="0110100000 (1) 0110000000" source="27649" target="27683" cy:directed="1"/>
      <edge id="31658" label="0110100000 (1) 0100100000" source="27649" target="27655" cy:directed="1"/>
      <edge id="31657" label="0110100000 (1) 0010100000" source="27649" target="27657" cy:directed="1"/>
      <edge id="31656" label="0110110000 (1) 0110111000" source="27648" target="27558" cy:directed="1"/>
      <edge id="31655" label="0110110000 (1) 0110010000" source="27648" target="27612" cy:directed="1"/>
      <edge id="31654" label="0110110000 (1) 0100110000" source="27648" target="27654" cy:directed="1"/>
      <edge id="31653" label="0110110000 (1) 0010110000" source="27648" target="27651" cy:directed="1"/>
      <edge id="31652" label="1001110000 (1) 1001111000" source="27647" target="27539" cy:directed="1"/>
      <edge id="31651" label="1001110000 (1) 1001010000" source="27647" target="27642" cy:directed="1"/>
      <edge id="31650" label="1001110000 (1) 1011110000" source="27647" target="27625" cy:directed="1"/>
      <edge id="31649" label="1011100000 (1) 1011110000" source="27646" target="27625" cy:directed="1"/>
      <edge id="31648" label="1011100000 (1) 1011000000" source="27646" target="27675" cy:directed="1"/>
      <edge id="31647" label="1011100000 (1) 1010100000" source="27646" target="27662" cy:directed="1"/>
      <edge id="31646" label="1011100000 (1) 1111100000" source="27646" target="27669" cy:directed="1"/>
      <edge id="31645" label="1000010000 (1) 1000010010" source="27645" target="27644" cy:directed="1"/>
      <edge id="31644" label="1000010000 (1) 1000011000" source="27645" target="27643" cy:directed="1"/>
      <edge id="31643" label="1000010000 (1) 1000000000" source="27645" target="27698" cy:directed="1"/>
      <edge id="31642" label="1000010000 (1) 1001010000" source="27645" target="27642" cy:directed="1"/>
      <edge id="31641" label="1000010010 (1) 1000000010" source="27644" target="27697" cy:directed="1"/>
      <edge id="31640" label="1000010010 (1) 1001010010" source="27644" target="27609" cy:directed="1"/>
      <edge id="31639" label="1000011000 (1) 1000011010" source="27643" target="27489" cy:directed="1"/>
      <edge id="31638" label="1000011000 (1) 1000011100" source="27643" target="27488" cy:directed="1"/>
      <edge id="31637" label="1000011000 (1) 1000001000" source="27643" target="27601" cy:directed="1"/>
      <edge id="31636" label="1000011000 (1) 1001011000" source="27643" target="27608" cy:directed="1"/>
      <edge id="31635" label="1001010000 (1) 1001010010" source="27642" target="27609" cy:directed="1"/>
      <edge id="31634" label="1001010000 (1) 1001011000" source="27642" target="27608" cy:directed="1"/>
      <edge id="31633" label="1001010000 (1) 1001000000" source="27642" target="27696" cy:directed="1"/>
      <edge id="31632" label="0001110000 (1) 0001111000" source="27641" target="27533" cy:directed="1"/>
      <edge id="31631" label="0001110000 (1) 0001010000" source="27641" target="27636" cy:directed="1"/>
      <edge id="31630" label="0001110000 (1) 0011110000" source="27641" target="27621" cy:directed="1"/>
      <edge id="31629" label="0011100000 (1) 0011110000" source="27640" target="27621" cy:directed="1"/>
      <edge id="31628" label="0011100000 (1) 0011000000" source="27640" target="27672" cy:directed="1"/>
      <edge id="31627" label="0011100000 (1) 0010100000" source="27640" target="27657" cy:directed="1"/>
      <edge id="31626" label="0000010000 (1) 0000010010" source="27639" target="27638" cy:directed="1"/>
      <edge id="31625" label="0000010000 (1) 0000011000" source="27639" target="27637" cy:directed="1"/>
      <edge id="31624" label="0000010000 (1) 0000000000" source="27639" target="27701" cy:directed="1"/>
      <edge id="31623" label="0000010000 (1) 0001010000" source="27639" target="27636" cy:directed="1"/>
      <edge id="31622" label="0000010010 (1) 0000000010" source="27638" target="27700" cy:directed="1"/>
      <edge id="31621" label="0000010010 (1) 0001010010" source="27638" target="27607" cy:directed="1"/>
      <edge id="31620" label="0000011000 (1) 0000011010" source="27637" target="27487" cy:directed="1"/>
      <edge id="31619" label="0000011000 (1) 0000011100" source="27637" target="27486" cy:directed="1"/>
      <edge id="31618" label="0000011000 (1) 0000001000" source="27637" target="27597" cy:directed="1"/>
      <edge id="31617" label="0000011000 (1) 0001011000" source="27637" target="27606" cy:directed="1"/>
      <edge id="31616" label="0001010000 (1) 0001010010" source="27636" target="27607" cy:directed="1"/>
      <edge id="31615" label="0001010000 (1) 0001011000" source="27636" target="27606" cy:directed="1"/>
      <edge id="31614" label="0001010000 (1) 0001000000" source="27636" target="27699" cy:directed="1"/>
      <edge id="31613" label="1101110000 (1) 1101111000" source="27635" target="27525" cy:directed="1"/>
      <edge id="31612" label="1101110000 (1) 1001110000" source="27635" target="27647" cy:directed="1"/>
      <edge id="31611" label="1100010000 (1) 1100010010" source="27634" target="27633" cy:directed="1"/>
      <edge id="31610" label="1100010000 (1) 1100011000" source="27634" target="27632" cy:directed="1"/>
      <edge id="31609" label="1100010000 (1) 1100000000" source="27634" target="27695" cy:directed="1"/>
      <edge id="31608" label="1100010000 (1) 1101010000" source="27634" target="27631" cy:directed="1"/>
      <edge id="31607" label="1100010000 (1) 1000010000" source="27634" target="27645" cy:directed="1"/>
      <edge id="31606" label="1100010010 (1) 1100000010" source="27633" target="27694" cy:directed="1"/>
      <edge id="31605" label="1100010010 (1) 1101010010" source="27633" target="27605" cy:directed="1"/>
      <edge id="31604" label="1100010010 (1) 1000010010" source="27633" target="27644" cy:directed="1"/>
      <edge id="31603" label="1100011000 (1) 1100011010" source="27632" target="27483" cy:directed="1"/>
      <edge id="31602" label="1100011000 (1) 1100011100" source="27632" target="27482" cy:directed="1"/>
      <edge id="31601" label="1100011000 (1) 1100001000" source="27632" target="27598" cy:directed="1"/>
      <edge id="31600" label="1100011000 (1) 1101011000" source="27632" target="27604" cy:directed="1"/>
      <edge id="31599" label="1100011000 (1) 1000011000" source="27632" target="27643" cy:directed="1"/>
      <edge id="31598" label="1101010000 (1) 1101010010" source="27631" target="27605" cy:directed="1"/>
      <edge id="31597" label="1101010000 (1) 1101011000" source="27631" target="27604" cy:directed="1"/>
      <edge id="31596" label="1101010000 (1) 1101000000" source="27631" target="27693" cy:directed="1"/>
      <edge id="31595" label="1101010000 (1) 1101110000" source="27631" target="27635" cy:directed="1"/>
      <edge id="31594" label="1101010000 (1) 1001010000" source="27631" target="27642" cy:directed="1"/>
      <edge id="31593" label="0101110000 (1) 0101111000" source="27630" target="27524" cy:directed="1"/>
      <edge id="31592" label="0101110000 (1) 0001110000" source="27630" target="27641" cy:directed="1"/>
      <edge id="31591" label="0100010000 (1) 0100010010" source="27629" target="27628" cy:directed="1"/>
      <edge id="31590" label="0100010000 (1) 0100011000" source="27629" target="27627" cy:directed="1"/>
      <edge id="31589" label="0100010000 (1) 0100000000" source="27629" target="27692" cy:directed="1"/>
      <edge id="31588" label="0100010000 (1) 0101010000" source="27629" target="27626" cy:directed="1"/>
      <edge id="31587" label="0100010000 (1) 0000010000" source="27629" target="27639" cy:directed="1"/>
      <edge id="31586" label="0100010010 (1) 0100000010" source="27628" target="27691" cy:directed="1"/>
      <edge id="31585" label="0100010010 (1) 0101010010" source="27628" target="27603" cy:directed="1"/>
      <edge id="31584" label="0100010010 (1) 0000010010" source="27628" target="27638" cy:directed="1"/>
      <edge id="31583" label="0100011000 (1) 0100011010" source="27627" target="27476" cy:directed="1"/>
      <edge id="31582" label="0100011000 (1) 0100011100" source="27627" target="27475" cy:directed="1"/>
      <edge id="31581" label="0100011000 (1) 0100001000" source="27627" target="27592" cy:directed="1"/>
      <edge id="31580" label="0100011000 (1) 0101011000" source="27627" target="27602" cy:directed="1"/>
      <edge id="31579" label="0100011000 (1) 0000011000" source="27627" target="27637" cy:directed="1"/>
      <edge id="31578" label="0101010000 (1) 0101010010" source="27626" target="27603" cy:directed="1"/>
      <edge id="31577" label="0101010000 (1) 0101011000" source="27626" target="27602" cy:directed="1"/>
      <edge id="31576" label="0101010000 (1) 0101000000" source="27626" target="27690" cy:directed="1"/>
      <edge id="31575" label="0101010000 (1) 0101110000" source="27626" target="27630" cy:directed="1"/>
      <edge id="31574" label="0101010000 (1) 0001010000" source="27626" target="27636" cy:directed="1"/>
      <edge id="31573" label="1011110000 (1) 1011111000" source="27625" target="27510" cy:directed="1"/>
      <edge id="31572" label="1011110000 (1) 1011010000" source="27625" target="27589" cy:directed="1"/>
      <edge id="31571" label="1011110000 (1) 1010110000" source="27625" target="27653" cy:directed="1"/>
      <edge id="31570" label="1010010000 (1) 1010010010" source="27624" target="27623" cy:directed="1"/>
      <edge id="31569" label="1010010000 (1) 1010011000" source="27624" target="27622" cy:directed="1"/>
      <edge id="31568" label="1010010000 (1) 1010000000" source="27624" target="27689" cy:directed="1"/>
      <edge id="31567" label="1010010000 (1) 1000010000" source="27624" target="27645" cy:directed="1"/>
      <edge id="31566" label="1010010010 (1) 1010000010" source="27623" target="27688" cy:directed="1"/>
      <edge id="31565" label="1010010010 (1) 1000010010" source="27623" target="27644" cy:directed="1"/>
      <edge id="31564" label="1010011000 (1) 1010011010" source="27622" target="27468" cy:directed="1"/>
      <edge id="31563" label="1010011000 (1) 1010011100" source="27622" target="27467" cy:directed="1"/>
      <edge id="31562" label="1010011000 (1) 1010001000" source="27622" target="27577" cy:directed="1"/>
      <edge id="31561" label="1010011000 (1) 1000011000" source="27622" target="27643" cy:directed="1"/>
      <edge id="31560" label="0011110000 (1) 0011111000" source="27621" target="27507" cy:directed="1"/>
      <edge id="31559" label="0011110000 (1) 0011010000" source="27621" target="27586" cy:directed="1"/>
      <edge id="31558" label="0011110000 (1) 0010110000" source="27621" target="27651" cy:directed="1"/>
      <edge id="31557" label="0010010000 (1) 0010010010" source="27620" target="27619" cy:directed="1"/>
      <edge id="31556" label="0010010000 (1) 0010011000" source="27620" target="27618" cy:directed="1"/>
      <edge id="31555" label="0010010000 (1) 0010000000" source="27620" target="27686" cy:directed="1"/>
      <edge id="31554" label="0010010000 (1) 0000010000" source="27620" target="27639" cy:directed="1"/>
      <edge id="31553" label="0010010010 (1) 0010000010" source="27619" target="27685" cy:directed="1"/>
      <edge id="31552" label="0010010010 (1) 0000010010" source="27619" target="27638" cy:directed="1"/>
      <edge id="31551" label="0010011000 (1) 0010011010" source="27618" target="27466" cy:directed="1"/>
      <edge id="31550" label="0010011000 (1) 0010011100" source="27618" target="27465" cy:directed="1"/>
      <edge id="31549" label="0010011000 (1) 0010001000" source="27618" target="27574" cy:directed="1"/>
      <edge id="31548" label="0010011000 (1) 0000011000" source="27618" target="27637" cy:directed="1"/>
      <edge id="31547" label="1111110000 (1) 1111111000" source="27617" target="27503" cy:directed="1"/>
      <edge id="31546" label="1111110000 (1) 1110110000" source="27617" target="27650" cy:directed="1"/>
      <edge id="31545" label="1111110000 (1) 1101110000" source="27617" target="27635" cy:directed="1"/>
      <edge id="31544" label="1111110000 (1) 1011110000" source="27617" target="27625" cy:directed="1"/>
      <edge id="31543" label="1110010000 (1) 1110010010" source="27616" target="27615" cy:directed="1"/>
      <edge id="31542" label="1110010000 (1) 1110011000" source="27616" target="27614" cy:directed="1"/>
      <edge id="31541" label="1110010000 (1) 1110000000" source="27616" target="27687" cy:directed="1"/>
      <edge id="31540" label="1110010000 (1) 1100010000" source="27616" target="27634" cy:directed="1"/>
      <edge id="31539" label="1110010000 (1) 1010010000" source="27616" target="27624" cy:directed="1"/>
      <edge id="31538" label="1110010010 (1) 1110000010" source="27615" target="27684" cy:directed="1"/>
      <edge id="31537" label="1110010010 (1) 1100010010" source="27615" target="27633" cy:directed="1"/>
      <edge id="31536" label="1110010010 (1) 1010010010" source="27615" target="27623" cy:directed="1"/>
      <edge id="31535" label="1110011000 (1) 1110011010" source="27614" target="27463" cy:directed="1"/>
      <edge id="31534" label="1110011000 (1) 1110011100" source="27614" target="27462" cy:directed="1"/>
      <edge id="31533" label="1110011000 (1) 1110001000" source="27614" target="27575" cy:directed="1"/>
      <edge id="31532" label="1110011000 (1) 1100011000" source="27614" target="27632" cy:directed="1"/>
      <edge id="31531" label="1110011000 (1) 1010011000" source="27614" target="27622" cy:directed="1"/>
      <edge id="31530" label="0111110000 (1) 0111111000" source="27613" target="27502" cy:directed="1"/>
      <edge id="31529" label="0111110000 (1) 0110110000" source="27613" target="27648" cy:directed="1"/>
      <edge id="31528" label="0111110000 (1) 0101110000" source="27613" target="27630" cy:directed="1"/>
      <edge id="31527" label="0111110000 (1) 0011110000" source="27613" target="27621" cy:directed="1"/>
      <edge id="31526" label="0110010000 (1) 0110010010" source="27612" target="27611" cy:directed="1"/>
      <edge id="31525" label="0110010000 (1) 0110011000" source="27612" target="27610" cy:directed="1"/>
      <edge id="31524" label="0110010000 (1) 0110000000" source="27612" target="27683" cy:directed="1"/>
      <edge id="31523" label="0110010000 (1) 0100010000" source="27612" target="27629" cy:directed="1"/>
      <edge id="31522" label="0110010000 (1) 0010010000" source="27612" target="27620" cy:directed="1"/>
      <edge id="31521" label="0110010010 (1) 0110000010" source="27611" target="27682" cy:directed="1"/>
      <edge id="31520" label="0110010010 (1) 0100010010" source="27611" target="27628" cy:directed="1"/>
      <edge id="31519" label="0110010010 (1) 0010010010" source="27611" target="27619" cy:directed="1"/>
      <edge id="31518" label="0110011000 (1) 0110011010" source="27610" target="27460" cy:directed="1"/>
      <edge id="31517" label="0110011000 (1) 0110011100" source="27610" target="27459" cy:directed="1"/>
      <edge id="31516" label="0110011000 (1) 0110001000" source="27610" target="27569" cy:directed="1"/>
      <edge id="31515" label="0110011000 (1) 0100011000" source="27610" target="27627" cy:directed="1"/>
      <edge id="31514" label="0110011000 (1) 0010011000" source="27610" target="27618" cy:directed="1"/>
      <edge id="31513" label="1001010010 (1) 1001000010" source="27609" target="27680" cy:directed="1"/>
      <edge id="31512" label="1001011000 (1) 1001011010" source="27608" target="27454" cy:directed="1"/>
      <edge id="31511" label="1001011000 (1) 1001011100" source="27608" target="27453" cy:directed="1"/>
      <edge id="31510" label="1001011000 (1) 1001001000" source="27608" target="27599" cy:directed="1"/>
      <edge id="31509" label="0001010010 (1) 0001000010" source="27607" target="27681" cy:directed="1"/>
      <edge id="31508" label="0001011000 (1) 0001011010" source="27606" target="27452" cy:directed="1"/>
      <edge id="31507" label="0001011000 (1) 0001011100" source="27606" target="27451" cy:directed="1"/>
      <edge id="31506" label="0001011000 (1) 0001001000" source="27606" target="27595" cy:directed="1"/>
      <edge id="31505" label="1101010010 (1) 1101000010" source="27605" target="27679" cy:directed="1"/>
      <edge id="31504" label="1101010010 (1) 1101110010" source="27605" target="27310" cy:directed="1"/>
      <edge id="31503" label="1101010010 (1) 1001010010" source="27605" target="27609" cy:directed="1"/>
      <edge id="31502" label="1101011000 (1) 1101011010" source="27604" target="27449" cy:directed="1"/>
      <edge id="31501" label="1101011000 (1) 1101011100" source="27604" target="27448" cy:directed="1"/>
      <edge id="31500" label="1101011000 (1) 1101001000" source="27604" target="27593" cy:directed="1"/>
      <edge id="31499" label="1101011000 (1) 1101111000" source="27604" target="27525" cy:directed="1"/>
      <edge id="31498" label="1101011000 (1) 1001011000" source="27604" target="27608" cy:directed="1"/>
      <edge id="31497" label="0101010010 (1) 0101000010" source="27603" target="27677" cy:directed="1"/>
      <edge id="31496" label="0101010010 (1) 0101110010" source="27603" target="27304" cy:directed="1"/>
      <edge id="31495" label="0101010010 (1) 0001010010" source="27603" target="27607" cy:directed="1"/>
      <edge id="31494" label="0101011000 (1) 0101011010" source="27602" target="27447" cy:directed="1"/>
      <edge id="31493" label="0101011000 (1) 0101011100" source="27602" target="27446" cy:directed="1"/>
      <edge id="31492" label="0101011000 (1) 0101001000" source="27602" target="27590" cy:directed="1"/>
      <edge id="31491" label="0101011000 (1) 0101111000" source="27602" target="27524" cy:directed="1"/>
      <edge id="31490" label="0101011000 (1) 0001011000" source="27602" target="27606" cy:directed="1"/>
      <edge id="31489" label="1000001000 (1) 1000001010" source="27601" target="27600" cy:directed="1"/>
      <edge id="31488" label="1000001000 (1) 1000000000" source="27601" target="27698" cy:directed="1"/>
      <edge id="31487" label="1000001000 (1) 1001001000" source="27601" target="27599" cy:directed="1"/>
      <edge id="31486" label="1000001000 (1) 1100001000" source="27601" target="27598" cy:directed="1"/>
      <edge id="31485" label="1000001010 (1) 1000000010" source="27600" target="27697" cy:directed="1"/>
      <edge id="31484" label="1000001010 (1) 1001001010" source="27600" target="27564" cy:directed="1"/>
      <edge id="31483" label="1000001010 (1) 1100001010" source="27600" target="27594" cy:directed="1"/>
      <edge id="31482" label="1001001000 (1) 1001001010" source="27599" target="27564" cy:directed="1"/>
      <edge id="31481" label="1001001000 (1) 1001000000" source="27599" target="27696" cy:directed="1"/>
      <edge id="31480" label="1001001000 (1) 1101001000" source="27599" target="27593" cy:directed="1"/>
      <edge id="31479" label="1100001000 (1) 1100001010" source="27598" target="27594" cy:directed="1"/>
      <edge id="31478" label="1100001000 (1) 1100000000" source="27598" target="27695" cy:directed="1"/>
      <edge id="31477" label="1100001000 (1) 1101001000" source="27598" target="27593" cy:directed="1"/>
      <edge id="31476" label="0000001000 (1) 0000001010" source="27597" target="27596" cy:directed="1"/>
      <edge id="31475" label="0000001000 (1) 0000000000" source="27597" target="27701" cy:directed="1"/>
      <edge id="31474" label="0000001000 (1) 0001001000" source="27597" target="27595" cy:directed="1"/>
      <edge id="31473" label="0000001010 (1) 0000000010" source="27596" target="27700" cy:directed="1"/>
      <edge id="31472" label="0000001010 (1) 0001001010" source="27596" target="27562" cy:directed="1"/>
      <edge id="31471" label="0001001000 (1) 0001001010" source="27595" target="27562" cy:directed="1"/>
      <edge id="31470" label="0001001000 (1) 0001000000" source="27595" target="27699" cy:directed="1"/>
      <edge id="31469" label="1100001010 (1) 1100000010" source="27594" target="27694" cy:directed="1"/>
      <edge id="31468" label="1100001010 (1) 1101001010" source="27594" target="27560" cy:directed="1"/>
      <edge id="31467" label="1101001000 (1) 1101001010" source="27593" target="27560" cy:directed="1"/>
      <edge id="31466" label="1101001000 (1) 1101000000" source="27593" target="27693" cy:directed="1"/>
      <edge id="31465" label="1101001000 (1) 1101101000" source="27593" target="27559" cy:directed="1"/>
      <edge id="31464" label="0100001000 (1) 0100001010" source="27592" target="27591" cy:directed="1"/>
      <edge id="31463" label="0100001000 (1) 0100000000" source="27592" target="27692" cy:directed="1"/>
      <edge id="31462" label="0100001000 (1) 0101001000" source="27592" target="27590" cy:directed="1"/>
      <edge id="31461" label="0100001000 (1) 0000001000" source="27592" target="27597" cy:directed="1"/>
      <edge id="31460" label="0100001010 (1) 0100000010" source="27591" target="27691" cy:directed="1"/>
      <edge id="31459" label="0100001010 (1) 0101001010" source="27591" target="27557" cy:directed="1"/>
      <edge id="31458" label="0100001010 (1) 0000001010" source="27591" target="27596" cy:directed="1"/>
      <edge id="31457" label="0101001000 (1) 0101001010" source="27590" target="27557" cy:directed="1"/>
      <edge id="31456" label="0101001000 (1) 0101000000" source="27590" target="27690" cy:directed="1"/>
      <edge id="31455" label="0101001000 (1) 0101101000" source="27590" target="27556" cy:directed="1"/>
      <edge id="31454" label="0101001000 (1) 0001001000" source="27590" target="27595" cy:directed="1"/>
      <edge id="31453" label="1011010000 (1) 1011010010" source="27589" target="27588" cy:directed="1"/>
      <edge id="31452" label="1011010000 (1) 1011011000" source="27589" target="27587" cy:directed="1"/>
      <edge id="31451" label="1011010000 (1) 1011000000" source="27589" target="27675" cy:directed="1"/>
      <edge id="31450" label="1011010000 (1) 1010010000" source="27589" target="27624" cy:directed="1"/>
      <edge id="31449" label="1011010000 (1) 1001010000" source="27589" target="27642" cy:directed="1"/>
      <edge id="31448" label="1011010010 (1) 1011000010" source="27588" target="27674" cy:directed="1"/>
      <edge id="31447" label="1011010010 (1) 1010010010" source="27588" target="27623" cy:directed="1"/>
      <edge id="31446" label="1011010010 (1) 1001010010" source="27588" target="27609" cy:directed="1"/>
      <edge id="31445" label="1011011000 (1) 1011011010" source="27587" target="27443" cy:directed="1"/>
      <edge id="31444" label="1011011000 (1) 1011011100" source="27587" target="27442" cy:directed="1"/>
      <edge id="31443" label="1011011000 (1) 1011001000" source="27587" target="27549" cy:directed="1"/>
      <edge id="31442" label="1011011000 (1) 1010011000" source="27587" target="27622" cy:directed="1"/>
      <edge id="31441" label="1011011000 (1) 1001011000" source="27587" target="27608" cy:directed="1"/>
      <edge id="31440" label="0011010000 (1) 0011010010" source="27586" target="27585" cy:directed="1"/>
      <edge id="31439" label="0011010000 (1) 0011011000" source="27586" target="27584" cy:directed="1"/>
      <edge id="31438" label="0011010000 (1) 0011000000" source="27586" target="27672" cy:directed="1"/>
      <edge id="31437" label="0011010000 (1) 0010010000" source="27586" target="27620" cy:directed="1"/>
      <edge id="31436" label="0011010000 (1) 0001010000" source="27586" target="27636" cy:directed="1"/>
      <edge id="31435" label="0011010010 (1) 0011000010" source="27585" target="27671" cy:directed="1"/>
      <edge id="31434" label="0011010010 (1) 0010010010" source="27585" target="27619" cy:directed="1"/>
      <edge id="31433" label="0011010010 (1) 0001010010" source="27585" target="27607" cy:directed="1"/>
      <edge id="31432" label="0011011000 (1) 0011011010" source="27584" target="27439" cy:directed="1"/>
      <edge id="31431" label="0011011000 (1) 0011011100" source="27584" target="27438" cy:directed="1"/>
      <edge id="31430" label="0011011000 (1) 0011001000" source="27584" target="27541" cy:directed="1"/>
      <edge id="31429" label="0011011000 (1) 0010011000" source="27584" target="27618" cy:directed="1"/>
      <edge id="31428" label="0011011000 (1) 0001011000" source="27584" target="27606" cy:directed="1"/>
      <edge id="31427" label="0111010000 (1) 0111010010" source="27583" target="27582" cy:directed="1"/>
      <edge id="31426" label="0111010000 (1) 0111011000" source="27583" target="27581" cy:directed="1"/>
      <edge id="31425" label="0111010000 (1) 0111000000" source="27583" target="27668" cy:directed="1"/>
      <edge id="31424" label="0111010000 (1) 0111110000" source="27583" target="27613" cy:directed="1"/>
      <edge id="31423" label="0111010000 (1) 0110010000" source="27583" target="27612" cy:directed="1"/>
      <edge id="31422" label="0111010000 (1) 0101010000" source="27583" target="27626" cy:directed="1"/>
      <edge id="31421" label="0111010000 (1) 0011010000" source="27583" target="27586" cy:directed="1"/>
      <edge id="31420" label="0111010010 (1) 0111000010" source="27582" target="27667" cy:directed="1"/>
      <edge id="31419" label="0111010010 (1) 0111110010" source="27582" target="27293" cy:directed="1"/>
      <edge id="31418" label="0111010010 (1) 0110010010" source="27582" target="27611" cy:directed="1"/>
      <edge id="31417" label="0111010010 (1) 0101010010" source="27582" target="27603" cy:directed="1"/>
      <edge id="31416" label="0111010010 (1) 0011010010" source="27582" target="27585" cy:directed="1"/>
      <edge id="31415" label="0111011000 (1) 0111011010" source="27581" target="27427" cy:directed="1"/>
      <edge id="31414" label="0111011000 (1) 0111011100" source="27581" target="27426" cy:directed="1"/>
      <edge id="31413" label="0111011000 (1) 0111001000" source="27581" target="27528" cy:directed="1"/>
      <edge id="31412" label="0111011000 (1) 0111111000" source="27581" target="27502" cy:directed="1"/>
      <edge id="31411" label="0111011000 (1) 0110011000" source="27581" target="27610" cy:directed="1"/>
      <edge id="31410" label="0111011000 (1) 0101011000" source="27581" target="27602" cy:directed="1"/>
      <edge id="31409" label="0111011000 (1) 0011011000" source="27581" target="27584" cy:directed="1"/>
      <edge id="31408" label="1111010000 (1) 1111010010" source="27580" target="27579" cy:directed="1"/>
      <edge id="31407" label="1111010000 (1) 1111011000" source="27580" target="27578" cy:directed="1"/>
      <edge id="31406" label="1111010000 (1) 1111000000" source="27580" target="27673" cy:directed="1"/>
      <edge id="31405" label="1111010000 (1) 1111110000" source="27580" target="27617" cy:directed="1"/>
      <edge id="31404" label="1111010000 (1) 1110010000" source="27580" target="27616" cy:directed="1"/>
      <edge id="31403" label="1111010000 (1) 1101010000" source="27580" target="27631" cy:directed="1"/>
      <edge id="31402" label="1111010000 (1) 1011010000" source="27580" target="27589" cy:directed="1"/>
      <edge id="31401" label="1111010010 (1) 1111000010" source="27579" target="27670" cy:directed="1"/>
      <edge id="31400" label="1111010010 (1) 1111110010" source="27579" target="27292" cy:directed="1"/>
      <edge id="31399" label="1111010010 (1) 1110010010" source="27579" target="27615" cy:directed="1"/>
      <edge id="31398" label="1111010010 (1) 1101010010" source="27579" target="27605" cy:directed="1"/>
      <edge id="31397" label="1111010010 (1) 1011010010" source="27579" target="27588" cy:directed="1"/>
      <edge id="31396" label="1111011000 (1) 1111011010" source="27578" target="27425" cy:directed="1"/>
      <edge id="31395" label="1111011000 (1) 1111011100" source="27578" target="27424" cy:directed="1"/>
      <edge id="31394" label="1111011000 (1) 1111001000" source="27578" target="27547" cy:directed="1"/>
      <edge id="31393" label="1111011000 (1) 1111111000" source="27578" target="27503" cy:directed="1"/>
      <edge id="31392" label="1111011000 (1) 1110011000" source="27578" target="27614" cy:directed="1"/>
      <edge id="31391" label="1111011000 (1) 1101011000" source="27578" target="27604" cy:directed="1"/>
      <edge id="31390" label="1111011000 (1) 1011011000" source="27578" target="27587" cy:directed="1"/>
      <edge id="31389" label="1010001000 (1) 1010001010" source="27577" target="27576" cy:directed="1"/>
      <edge id="31388" label="1010001000 (1) 1010000000" source="27577" target="27689" cy:directed="1"/>
      <edge id="31387" label="1010001000 (1) 1000001000" source="27577" target="27601" cy:directed="1"/>
      <edge id="31386" label="1010001000 (1) 1110001000" source="27577" target="27575" cy:directed="1"/>
      <edge id="31385" label="1010001010 (1) 1010000010" source="27576" target="27688" cy:directed="1"/>
      <edge id="31384" label="1010001010 (1) 1000001010" source="27576" target="27600" cy:directed="1"/>
      <edge id="31383" label="1010001010 (1) 1110001010" source="27576" target="27571" cy:directed="1"/>
      <edge id="31382" label="1110001000 (1) 1110001010" source="27575" target="27571" cy:directed="1"/>
      <edge id="31381" label="1110001000 (1) 1110000000" source="27575" target="27687" cy:directed="1"/>
      <edge id="31380" label="1110001000 (1) 1100001000" source="27575" target="27598" cy:directed="1"/>
      <edge id="31379" label="0010001000 (1) 0010001010" source="27574" target="27573" cy:directed="1"/>
      <edge id="31378" label="0010001000 (1) 0010000000" source="27574" target="27686" cy:directed="1"/>
      <edge id="31377" label="0010001000 (1) 0000001000" source="27574" target="27597" cy:directed="1"/>
      <edge id="31376" label="0010001010 (1) 0010000010" source="27573" target="27685" cy:directed="1"/>
      <edge id="31375" label="0010001010 (1) 0000001010" source="27573" target="27596" cy:directed="1"/>
      <edge id="31374" label="1000111000 (1) 1000111100" source="27572" target="27417" cy:directed="1"/>
      <edge id="31373" label="1000111000 (1) 1000011000" source="27572" target="27643" cy:directed="1"/>
      <edge id="31372" label="1000111000 (1) 1001111000" source="27572" target="27539" cy:directed="1"/>
      <edge id="31371" label="1000111000 (1) 1010111000" source="27572" target="27565" cy:directed="1"/>
      <edge id="31370" label="1110001010 (1) 1110000010" source="27571" target="27684" cy:directed="1"/>
      <edge id="31369" label="1110001010 (1) 1100001010" source="27571" target="27594" cy:directed="1"/>
      <edge id="31368" label="0000111000 (1) 0000111100" source="27570" target="27416" cy:directed="1"/>
      <edge id="31367" label="0000111000 (1) 0000011000" source="27570" target="27637" cy:directed="1"/>
      <edge id="31366" label="0000111000 (1) 0001111000" source="27570" target="27533" cy:directed="1"/>
      <edge id="31365" label="0000111000 (1) 0010111000" source="27570" target="27563" cy:directed="1"/>
      <edge id="31364" label="0110001000 (1) 0110001010" source="27569" target="27568" cy:directed="1"/>
      <edge id="31363" label="0110001000 (1) 0110000000" source="27569" target="27683" cy:directed="1"/>
      <edge id="31362" label="0110001000 (1) 0100001000" source="27569" target="27592" cy:directed="1"/>
      <edge id="31361" label="0110001000 (1) 0010001000" source="27569" target="27574" cy:directed="1"/>
      <edge id="31360" label="0110001010 (1) 0110000010" source="27568" target="27682" cy:directed="1"/>
      <edge id="31359" label="0110001010 (1) 0100001010" source="27568" target="27591" cy:directed="1"/>
      <edge id="31358" label="0110001010 (1) 0010001010" source="27568" target="27573" cy:directed="1"/>
      <edge id="31357" label="1100111000 (1) 1100111100" source="27567" target="27414" cy:directed="1"/>
      <edge id="31356" label="1100111000 (1) 1100011000" source="27567" target="27632" cy:directed="1"/>
      <edge id="31355" label="1100111000 (1) 1101111000" source="27567" target="27525" cy:directed="1"/>
      <edge id="31354" label="1100111000 (1) 1000111000" source="27567" target="27572" cy:directed="1"/>
      <edge id="31353" label="0100111000 (1) 0100111100" source="27566" target="27411" cy:directed="1"/>
      <edge id="31352" label="0100111000 (1) 0100011000" source="27566" target="27627" cy:directed="1"/>
      <edge id="31351" label="0100111000 (1) 0101111000" source="27566" target="27524" cy:directed="1"/>
      <edge id="31350" label="0100111000 (1) 0000111000" source="27566" target="27570" cy:directed="1"/>
      <edge id="31349" label="1010111000 (1) 1010111100" source="27565" target="27392" cy:directed="1"/>
      <edge id="31348" label="1010111000 (1) 1010011000" source="27565" target="27622" cy:directed="1"/>
      <edge id="31347" label="1001001010 (1) 1001000010" source="27564" target="27680" cy:directed="1"/>
      <edge id="31346" label="1001001010 (1) 1101001010" source="27564" target="27560" cy:directed="1"/>
      <edge id="31345" label="0010111000 (1) 0010111100" source="27563" target="27390" cy:directed="1"/>
      <edge id="31344" label="0010111000 (1) 0010011000" source="27563" target="27618" cy:directed="1"/>
      <edge id="31343" label="0001001010 (1) 0001000010" source="27562" target="27681" cy:directed="1"/>
      <edge id="31342" label="1110111000 (1) 1110111100" source="27561" target="27378" cy:directed="1"/>
      <edge id="31341" label="1110111000 (1) 1110011000" source="27561" target="27614" cy:directed="1"/>
      <edge id="31340" label="1110111000 (1) 1100111000" source="27561" target="27567" cy:directed="1"/>
      <edge id="31339" label="1110111000 (1) 1010111000" source="27561" target="27565" cy:directed="1"/>
      <edge id="31338" label="1101001010 (1) 1101000010" source="27560" target="27679" cy:directed="1"/>
      <edge id="31337" label="1101001010 (1) 1101101010" source="27560" target="27194" cy:directed="1"/>
      <edge id="31336" label="1101101000 (1) 1101100000" source="27559" target="27678" cy:directed="1"/>
      <edge id="31335" label="1101101000 (1) 1101111000" source="27559" target="27525" cy:directed="1"/>
      <edge id="31334" label="0110111000 (1) 0110111100" source="27558" target="27377" cy:directed="1"/>
      <edge id="31333" label="0110111000 (1) 0110011000" source="27558" target="27610" cy:directed="1"/>
      <edge id="31332" label="0110111000 (1) 0100111000" source="27558" target="27566" cy:directed="1"/>
      <edge id="31331" label="0110111000 (1) 0010111000" source="27558" target="27563" cy:directed="1"/>
      <edge id="31330" label="0101001010 (1) 0101000010" source="27557" target="27677" cy:directed="1"/>
      <edge id="31329" label="0101001010 (1) 0101101010" source="27557" target="27187" cy:directed="1"/>
      <edge id="31328" label="0101001010 (1) 0001001010" source="27557" target="27562" cy:directed="1"/>
      <edge id="31327" label="0101101000 (1) 0101100000" source="27556" target="27676" cy:directed="1"/>
      <edge id="31326" label="0101101000 (1) 0101111000" source="27556" target="27524" cy:directed="1"/>
      <edge id="31325" label="0101101000 (1) 0001101000" source="27556" target="27522" cy:directed="1"/>
      <edge id="31324" label="1000000100 (1) 1000000110" source="27555" target="27554" cy:directed="1"/>
      <edge id="31323" label="1000000100 (1) 1000000000" source="27555" target="27698" cy:directed="1"/>
      <edge id="31322" label="1000000100 (1) 1000100100" source="27555" target="27553" cy:directed="1"/>
      <edge id="31321" label="1000000100 (1) 1001000100" source="27555" target="27552" cy:directed="1"/>
      <edge id="31320" label="1000000100 (1) 1010000100" source="27555" target="27551" cy:directed="1"/>
      <edge id="31319" label="1000000100 (1) 1100000100" source="27555" target="27550" cy:directed="1"/>
      <edge id="31318" label="1000000110 (1) 1000000010" source="27554" target="27697" cy:directed="1"/>
      <edge id="31317" label="1000000110 (1) 1000100110" source="27554" target="27163" cy:directed="1"/>
      <edge id="31316" label="1000000110 (1) 1001000110" source="27554" target="27499" cy:directed="1"/>
      <edge id="31315" label="1000000110 (1) 1010000110" source="27554" target="27516" cy:directed="1"/>
      <edge id="31314" label="1000000110 (1) 1100000110" source="27554" target="27538" cy:directed="1"/>
      <edge id="31313" label="1000100100 (1) 1000100000" source="27553" target="27665" cy:directed="1"/>
      <edge id="31312" label="1000100100 (1) 1000110100" source="27553" target="27469" cy:directed="1"/>
      <edge id="31311" label="1000100100 (1) 1001100100" source="27553" target="27498" cy:directed="1"/>
      <edge id="31310" label="1000100100 (1) 1010100100" source="27553" target="27515" cy:directed="1"/>
      <edge id="31309" label="1000100100 (1) 1100100100" source="27553" target="27537" cy:directed="1"/>
      <edge id="31308" label="1001000100 (1) 1001000110" source="27552" target="27499" cy:directed="1"/>
      <edge id="31307" label="1001000100 (1) 1001000000" source="27552" target="27696" cy:directed="1"/>
      <edge id="31306" label="1001000100 (1) 1001100100" source="27552" target="27498" cy:directed="1"/>
      <edge id="31305" label="1001000100 (1) 1011000100" source="27552" target="27497" cy:directed="1"/>
      <edge id="31304" label="1001000100 (1) 1101000100" source="27552" target="27536" cy:directed="1"/>
      <edge id="31303" label="1010000100 (1) 1010000110" source="27551" target="27516" cy:directed="1"/>
      <edge id="31302" label="1010000100 (1) 1010000000" source="27551" target="27689" cy:directed="1"/>
      <edge id="31301" label="1010000100 (1) 1010100100" source="27551" target="27515" cy:directed="1"/>
      <edge id="31300" label="1010000100 (1) 1110000100" source="27551" target="27514" cy:directed="1"/>
      <edge id="31299" label="1100000100 (1) 1100000110" source="27550" target="27538" cy:directed="1"/>
      <edge id="31298" label="1100000100 (1) 1100000000" source="27550" target="27695" cy:directed="1"/>
      <edge id="31297" label="1100000100 (1) 1100100100" source="27550" target="27537" cy:directed="1"/>
      <edge id="31296" label="1100000100 (1) 1101000100" source="27550" target="27536" cy:directed="1"/>
      <edge id="31295" label="1011001000 (1) 1011001010" source="27549" target="27548" cy:directed="1"/>
      <edge id="31294" label="1011001000 (1) 1011000000" source="27549" target="27675" cy:directed="1"/>
      <edge id="31293" label="1011001000 (1) 1010001000" source="27549" target="27577" cy:directed="1"/>
      <edge id="31292" label="1011001000 (1) 1001001000" source="27549" target="27599" cy:directed="1"/>
      <edge id="31291" label="1011001000 (1) 1111001000" source="27549" target="27547" cy:directed="1"/>
      <edge id="31290" label="1011001010 (1) 1011000010" source="27548" target="27674" cy:directed="1"/>
      <edge id="31289" label="1011001010 (1) 1010001010" source="27548" target="27576" cy:directed="1"/>
      <edge id="31288" label="1011001010 (1) 1001001010" source="27548" target="27564" cy:directed="1"/>
      <edge id="31287" label="1011001010 (1) 1111001010" source="27548" target="27535" cy:directed="1"/>
      <edge id="31286" label="1111001000 (1) 1111001010" source="27547" target="27535" cy:directed="1"/>
      <edge id="31285" label="1111001000 (1) 1111000000" source="27547" target="27673" cy:directed="1"/>
      <edge id="31284" label="1111001000 (1) 1111101000" source="27547" target="27534" cy:directed="1"/>
      <edge id="31283" label="1111001000 (1) 1110001000" source="27547" target="27575" cy:directed="1"/>
      <edge id="31282" label="1111001000 (1) 1101001000" source="27547" target="27593" cy:directed="1"/>
      <edge id="31281" label="0000000100 (1) 0000000110" source="27546" target="27545" cy:directed="1"/>
      <edge id="31280" label="0000000100 (1) 0000000000" source="27546" target="27701" cy:directed="1"/>
      <edge id="31279" label="0000000100 (1) 0000100100" source="27546" target="27544" cy:directed="1"/>
      <edge id="31278" label="0000000100 (1) 0001000100" source="27546" target="27543" cy:directed="1"/>
      <edge id="31277" label="0000000100 (1) 0010000100" source="27546" target="27542" cy:directed="1"/>
      <edge id="31276" label="0000000110 (1) 0000000010" source="27545" target="27700" cy:directed="1"/>
      <edge id="31275" label="0000000110 (1) 0000100110" source="27545" target="27162" cy:directed="1"/>
      <edge id="31274" label="0000000110 (1) 0001000110" source="27545" target="27496" cy:directed="1"/>
      <edge id="31273" label="0000000110 (1) 0010000110" source="27545" target="27513" cy:directed="1"/>
      <edge id="31272" label="0000100100 (1) 0000100000" source="27544" target="27660" cy:directed="1"/>
      <edge id="31271" label="0000100100 (1) 0000110100" source="27544" target="27464" cy:directed="1"/>
      <edge id="31270" label="0000100100 (1) 0001100100" source="27544" target="27495" cy:directed="1"/>
      <edge id="31269" label="0000100100 (1) 0010100100" source="27544" target="27512" cy:directed="1"/>
      <edge id="31268" label="0001000100 (1) 0001000110" source="27543" target="27496" cy:directed="1"/>
      <edge id="31267" label="0001000100 (1) 0001000000" source="27543" target="27699" cy:directed="1"/>
      <edge id="31266" label="0001000100 (1) 0001100100" source="27543" target="27495" cy:directed="1"/>
      <edge id="31265" label="0001000100 (1) 0011000100" source="27543" target="27494" cy:directed="1"/>
      <edge id="31264" label="0010000100 (1) 0010000110" source="27542" target="27513" cy:directed="1"/>
      <edge id="31263" label="0010000100 (1) 0010000000" source="27542" target="27686" cy:directed="1"/>
      <edge id="31262" label="0010000100 (1) 0010100100" source="27542" target="27512" cy:directed="1"/>
      <edge id="31261" label="0011001000 (1) 0011001010" source="27541" target="27540" cy:directed="1"/>
      <edge id="31260" label="0011001000 (1) 0011000000" source="27541" target="27672" cy:directed="1"/>
      <edge id="31259" label="0011001000 (1) 0010001000" source="27541" target="27574" cy:directed="1"/>
      <edge id="31258" label="0011001000 (1) 0001001000" source="27541" target="27595" cy:directed="1"/>
      <edge id="31257" label="0011001010 (1) 0011000010" source="27540" target="27671" cy:directed="1"/>
      <edge id="31256" label="0011001010 (1) 0010001010" source="27540" target="27573" cy:directed="1"/>
      <edge id="31255" label="0011001010 (1) 0001001010" source="27540" target="27562" cy:directed="1"/>
      <edge id="31254" label="1001111000 (1) 1001111100" source="27539" target="27341" cy:directed="1"/>
      <edge id="31253" label="1001111000 (1) 1001011000" source="27539" target="27608" cy:directed="1"/>
      <edge id="31252" label="1001111000 (1) 1011111000" source="27539" target="27510" cy:directed="1"/>
      <edge id="31251" label="1100000110 (1) 1100000010" source="27538" target="27694" cy:directed="1"/>
      <edge id="31250" label="1100000110 (1) 1100100110" source="27538" target="27158" cy:directed="1"/>
      <edge id="31249" label="1100000110 (1) 1101000110" source="27538" target="27493" cy:directed="1"/>
      <edge id="31248" label="1100100100 (1) 1100100000" source="27537" target="27661" cy:directed="1"/>
      <edge id="31247" label="1100100100 (1) 1100110100" source="27537" target="27461" cy:directed="1"/>
      <edge id="31246" label="1100100100 (1) 1101100100" source="27537" target="27492" cy:directed="1"/>
      <edge id="31245" label="1100100100 (1) 1110100100" source="27537" target="27508" cy:directed="1"/>
      <edge id="31244" label="1101000100 (1) 1101000110" source="27536" target="27493" cy:directed="1"/>
      <edge id="31243" label="1101000100 (1) 1101000000" source="27536" target="27693" cy:directed="1"/>
      <edge id="31242" label="1101000100 (1) 1101100100" source="27536" target="27492" cy:directed="1"/>
      <edge id="31241" label="1111001010 (1) 1111000010" source="27535" target="27670" cy:directed="1"/>
      <edge id="31240" label="1111001010 (1) 1111101010" source="27535" target="27157" cy:directed="1"/>
      <edge id="31239" label="1111001010 (1) 1110001010" source="27535" target="27571" cy:directed="1"/>
      <edge id="31238" label="1111001010 (1) 1101001010" source="27535" target="27560" cy:directed="1"/>
      <edge id="31237" label="1111101000 (1) 1111100000" source="27534" target="27669" cy:directed="1"/>
      <edge id="31236" label="1111101000 (1) 1111111000" source="27534" target="27503" cy:directed="1"/>
      <edge id="31235" label="1111101000 (1) 1110101000" source="27534" target="27501" cy:directed="1"/>
      <edge id="31234" label="1111101000 (1) 1101101000" source="27534" target="27559" cy:directed="1"/>
      <edge id="31233" label="0001111000 (1) 0001111100" source="27533" target="27338" cy:directed="1"/>
      <edge id="31232" label="0001111000 (1) 0001011000" source="27533" target="27606" cy:directed="1"/>
      <edge id="31231" label="0001111000 (1) 0011111000" source="27533" target="27507" cy:directed="1"/>
      <edge id="31230" label="0100000100 (1) 0100000110" source="27532" target="27531" cy:directed="1"/>
      <edge id="31229" label="0100000100 (1) 0100000000" source="27532" target="27692" cy:directed="1"/>
      <edge id="31228" label="0100000100 (1) 0100100100" source="27532" target="27530" cy:directed="1"/>
      <edge id="31227" label="0100000100 (1) 0101000100" source="27532" target="27529" cy:directed="1"/>
      <edge id="31226" label="0100000100 (1) 0000000100" source="27532" target="27546" cy:directed="1"/>
      <edge id="31225" label="0100000110 (1) 0100000010" source="27531" target="27691" cy:directed="1"/>
      <edge id="31224" label="0100000110 (1) 0100100110" source="27531" target="27156" cy:directed="1"/>
      <edge id="31223" label="0100000110 (1) 0101000110" source="27531" target="27491" cy:directed="1"/>
      <edge id="31222" label="0100000110 (1) 0000000110" source="27531" target="27545" cy:directed="1"/>
      <edge id="31221" label="0100100100 (1) 0100100000" source="27530" target="27655" cy:directed="1"/>
      <edge id="31220" label="0100100100 (1) 0100110100" source="27530" target="27458" cy:directed="1"/>
      <edge id="31219" label="0100100100 (1) 0101100100" source="27530" target="27490" cy:directed="1"/>
      <edge id="31218" label="0100100100 (1) 0110100100" source="27530" target="27504" cy:directed="1"/>
      <edge id="31217" label="0100100100 (1) 0000100100" source="27530" target="27544" cy:directed="1"/>
      <edge id="31216" label="0101000100 (1) 0101000110" source="27529" target="27491" cy:directed="1"/>
      <edge id="31215" label="0101000100 (1) 0101000000" source="27529" target="27690" cy:directed="1"/>
      <edge id="31214" label="0101000100 (1) 0101100100" source="27529" target="27490" cy:directed="1"/>
      <edge id="31213" label="0101000100 (1) 0001000100" source="27529" target="27543" cy:directed="1"/>
      <edge id="31212" label="0111001000 (1) 0111001010" source="27528" target="27527" cy:directed="1"/>
      <edge id="31211" label="0111001000 (1) 0111000000" source="27528" target="27668" cy:directed="1"/>
      <edge id="31210" label="0111001000 (1) 0111101000" source="27528" target="27526" cy:directed="1"/>
      <edge id="31209" label="0111001000 (1) 0110001000" source="27528" target="27569" cy:directed="1"/>
      <edge id="31208" label="0111001000 (1) 0101001000" source="27528" target="27590" cy:directed="1"/>
      <edge id="31207" label="0111001000 (1) 0011001000" source="27528" target="27541" cy:directed="1"/>
      <edge id="31206" label="0111001010 (1) 0111000010" source="27527" target="27667" cy:directed="1"/>
      <edge id="31205" label="0111001010 (1) 0111101010" source="27527" target="27159" cy:directed="1"/>
      <edge id="31204" label="0111001010 (1) 0110001010" source="27527" target="27568" cy:directed="1"/>
      <edge id="31203" label="0111001010 (1) 0101001010" source="27527" target="27557" cy:directed="1"/>
      <edge id="31202" label="0111001010 (1) 0011001010" source="27527" target="27540" cy:directed="1"/>
      <edge id="31201" label="0111101000 (1) 0111100000" source="27526" target="27666" cy:directed="1"/>
      <edge id="31200" label="0111101000 (1) 0111111000" source="27526" target="27502" cy:directed="1"/>
      <edge id="31199" label="0111101000 (1) 0110101000" source="27526" target="27500" cy:directed="1"/>
      <edge id="31198" label="0111101000 (1) 0101101000" source="27526" target="27556" cy:directed="1"/>
      <edge id="31197" label="0111101000 (1) 0011101000" source="27526" target="27485" cy:directed="1"/>
      <edge id="31196" label="1101111000 (1) 1101111100" source="27525" target="27329" cy:directed="1"/>
      <edge id="31195" label="1101111000 (1) 1001111000" source="27525" target="27539" cy:directed="1"/>
      <edge id="31194" label="0101111000 (1) 0101111100" source="27524" target="27328" cy:directed="1"/>
      <edge id="31193" label="0101111000 (1) 0001111000" source="27524" target="27533" cy:directed="1"/>
      <edge id="31192" label="0000101000 (1) 0000100000" source="27523" target="27660" cy:directed="1"/>
      <edge id="31191" label="0000101000 (1) 0000111000" source="27523" target="27570" cy:directed="1"/>
      <edge id="31190" label="0000101000 (1) 0000001000" source="27523" target="27597" cy:directed="1"/>
      <edge id="31189" label="0000101000 (1) 0001101000" source="27523" target="27522" cy:directed="1"/>
      <edge id="31188" label="0000101000 (1) 0010101000" source="27523" target="27521" cy:directed="1"/>
      <edge id="31187" label="0001101000 (1) 0001100000" source="27522" target="27658" cy:directed="1"/>
      <edge id="31186" label="0001101000 (1) 0001111000" source="27522" target="27533" cy:directed="1"/>
      <edge id="31185" label="0001101000 (1) 0001001000" source="27522" target="27595" cy:directed="1"/>
      <edge id="31184" label="0001101000 (1) 0011101000" source="27522" target="27485" cy:directed="1"/>
      <edge id="31183" label="0010101000 (1) 0010100000" source="27521" target="27657" cy:directed="1"/>
      <edge id="31182" label="0010101000 (1) 0010111000" source="27521" target="27563" cy:directed="1"/>
      <edge id="31181" label="0010101000 (1) 0010001000" source="27521" target="27574" cy:directed="1"/>
      <edge id="31180" label="1000101000 (1) 1000100000" source="27520" target="27665" cy:directed="1"/>
      <edge id="31179" label="1000101000 (1) 1000111000" source="27520" target="27572" cy:directed="1"/>
      <edge id="31178" label="1000101000 (1) 1000001000" source="27520" target="27601" cy:directed="1"/>
      <edge id="31177" label="1000101000 (1) 1001101000" source="27520" target="27519" cy:directed="1"/>
      <edge id="31176" label="1000101000 (1) 1010101000" source="27520" target="27518" cy:directed="1"/>
      <edge id="31175" label="1000101000 (1) 1100101000" source="27520" target="27517" cy:directed="1"/>
      <edge id="31174" label="1001101000 (1) 1001100000" source="27519" target="27663" cy:directed="1"/>
      <edge id="31173" label="1001101000 (1) 1001111000" source="27519" target="27539" cy:directed="1"/>
      <edge id="31172" label="1001101000 (1) 1001001000" source="27519" target="27599" cy:directed="1"/>
      <edge id="31171" label="1001101000 (1) 1011101000" source="27519" target="27484" cy:directed="1"/>
      <edge id="31170" label="1001101000 (1) 1101101000" source="27519" target="27559" cy:directed="1"/>
      <edge id="31169" label="1010101000 (1) 1010100000" source="27518" target="27662" cy:directed="1"/>
      <edge id="31168" label="1010101000 (1) 1010111000" source="27518" target="27565" cy:directed="1"/>
      <edge id="31167" label="1010101000 (1) 1010001000" source="27518" target="27577" cy:directed="1"/>
      <edge id="31166" label="1010101000 (1) 1110101000" source="27518" target="27501" cy:directed="1"/>
      <edge id="31165" label="1100101000 (1) 1100100000" source="27517" target="27661" cy:directed="1"/>
      <edge id="31164" label="1100101000 (1) 1100111000" source="27517" target="27567" cy:directed="1"/>
      <edge id="31163" label="1100101000 (1) 1100001000" source="27517" target="27598" cy:directed="1"/>
      <edge id="31162" label="1100101000 (1) 1101101000" source="27517" target="27559" cy:directed="1"/>
      <edge id="31161" label="1010000110 (1) 1010000010" source="27516" target="27688" cy:directed="1"/>
      <edge id="31160" label="1010000110 (1) 1010100110" source="27516" target="27132" cy:directed="1"/>
      <edge id="31159" label="1010000110 (1) 1110000110" source="27516" target="27509" cy:directed="1"/>
      <edge id="31158" label="1010100100 (1) 1010100000" source="27515" target="27662" cy:directed="1"/>
      <edge id="31157" label="1010100100 (1) 1010110100" source="27515" target="27457" cy:directed="1"/>
      <edge id="31156" label="1010100100 (1) 1110100100" source="27515" target="27508" cy:directed="1"/>
      <edge id="31155" label="1110000100 (1) 1110000110" source="27514" target="27509" cy:directed="1"/>
      <edge id="31154" label="1110000100 (1) 1110000000" source="27514" target="27687" cy:directed="1"/>
      <edge id="31153" label="1110000100 (1) 1110100100" source="27514" target="27508" cy:directed="1"/>
      <edge id="31152" label="1110000100 (1) 1100000100" source="27514" target="27550" cy:directed="1"/>
      <edge id="31151" label="0010000110 (1) 0010000010" source="27513" target="27685" cy:directed="1"/>
      <edge id="31150" label="0010000110 (1) 0010100110" source="27513" target="27130" cy:directed="1"/>
      <edge id="31149" label="0010100100 (1) 0010100000" source="27512" target="27657" cy:directed="1"/>
      <edge id="31148" label="0010100100 (1) 0010110100" source="27512" target="27456" cy:directed="1"/>
      <edge id="31147" label="0100101000 (1) 0100100000" source="27511" target="27655" cy:directed="1"/>
      <edge id="31146" label="0100101000 (1) 0100111000" source="27511" target="27566" cy:directed="1"/>
      <edge id="31145" label="0100101000 (1) 0100001000" source="27511" target="27592" cy:directed="1"/>
      <edge id="31144" label="0100101000 (1) 0101101000" source="27511" target="27556" cy:directed="1"/>
      <edge id="31143" label="0100101000 (1) 0000101000" source="27511" target="27523" cy:directed="1"/>
      <edge id="31142" label="1011111000 (1) 1011111100" source="27510" target="27306" cy:directed="1"/>
      <edge id="31141" label="1011111000 (1) 1011011000" source="27510" target="27587" cy:directed="1"/>
      <edge id="31140" label="1011111000 (1) 1010111000" source="27510" target="27565" cy:directed="1"/>
      <edge id="31139" label="1110000110 (1) 1110000010" source="27509" target="27684" cy:directed="1"/>
      <edge id="31138" label="1110000110 (1) 1110100110" source="27509" target="27118" cy:directed="1"/>
      <edge id="31137" label="1110000110 (1) 1100000110" source="27509" target="27538" cy:directed="1"/>
      <edge id="31136" label="1110100100 (1) 1110100000" source="27508" target="27652" cy:directed="1"/>
      <edge id="31135" label="1110100100 (1) 1110110100" source="27508" target="27455" cy:directed="1"/>
      <edge id="31134" label="0011111000 (1) 0011111100" source="27507" target="27309" cy:directed="1"/>
      <edge id="31133" label="0011111000 (1) 0011011000" source="27507" target="27584" cy:directed="1"/>
      <edge id="31132" label="0011111000 (1) 0010111000" source="27507" target="27563" cy:directed="1"/>
      <edge id="31131" label="0110000100 (1) 0110000110" source="27506" target="27505" cy:directed="1"/>
      <edge id="31130" label="0110000100 (1) 0110000000" source="27506" target="27683" cy:directed="1"/>
      <edge id="31129" label="0110000100 (1) 0110100100" source="27506" target="27504" cy:directed="1"/>
      <edge id="31128" label="0110000100 (1) 0100000100" source="27506" target="27532" cy:directed="1"/>
      <edge id="31127" label="0110000100 (1) 0010000100" source="27506" target="27542" cy:directed="1"/>
      <edge id="31126" label="0110000110 (1) 0110000010" source="27505" target="27682" cy:directed="1"/>
      <edge id="31125" label="0110000110 (1) 0110100110" source="27505" target="27117" cy:directed="1"/>
      <edge id="31124" label="0110000110 (1) 0100000110" source="27505" target="27531" cy:directed="1"/>
      <edge id="31123" label="0110000110 (1) 0010000110" source="27505" target="27513" cy:directed="1"/>
      <edge id="31122" label="0110100100 (1) 0110100000" source="27504" target="27649" cy:directed="1"/>
      <edge id="31121" label="0110100100 (1) 0110110100" source="27504" target="27450" cy:directed="1"/>
      <edge id="31120" label="0110100100 (1) 0010100100" source="27504" target="27512" cy:directed="1"/>
      <edge id="31119" label="1111111000 (1) 1111111100" source="27503" target="27303" cy:directed="1"/>
      <edge id="31118" label="1111111000 (1) 1110111000" source="27503" target="27561" cy:directed="1"/>
      <edge id="31117" label="1111111000 (1) 1101111000" source="27503" target="27525" cy:directed="1"/>
      <edge id="31116" label="1111111000 (1) 1011111000" source="27503" target="27510" cy:directed="1"/>
      <edge id="31115" label="0111111000 (1) 0111111100" source="27502" target="27302" cy:directed="1"/>
      <edge id="31114" label="0111111000 (1) 0110111000" source="27502" target="27558" cy:directed="1"/>
      <edge id="31113" label="0111111000 (1) 0101111000" source="27502" target="27524" cy:directed="1"/>
      <edge id="31112" label="0111111000 (1) 0011111000" source="27502" target="27507" cy:directed="1"/>
      <edge id="31111" label="1110101000 (1) 1110100000" source="27501" target="27652" cy:directed="1"/>
      <edge id="31110" label="1110101000 (1) 1110111000" source="27501" target="27561" cy:directed="1"/>
      <edge id="31109" label="1110101000 (1) 1110001000" source="27501" target="27575" cy:directed="1"/>
      <edge id="31108" label="1110101000 (1) 1100101000" source="27501" target="27517" cy:directed="1"/>
      <edge id="31107" label="0110101000 (1) 0110100000" source="27500" target="27649" cy:directed="1"/>
      <edge id="31106" label="0110101000 (1) 0110111000" source="27500" target="27558" cy:directed="1"/>
      <edge id="31105" label="0110101000 (1) 0110001000" source="27500" target="27569" cy:directed="1"/>
      <edge id="31104" label="0110101000 (1) 0100101000" source="27500" target="27511" cy:directed="1"/>
      <edge id="31103" label="0110101000 (1) 0010101000" source="27500" target="27521" cy:directed="1"/>
      <edge id="31102" label="1001000110 (1) 1001000010" source="27499" target="27680" cy:directed="1"/>
      <edge id="31101" label="1001000110 (1) 1001100110" source="27499" target="27076" cy:directed="1"/>
      <edge id="31100" label="1001000110 (1) 1011000110" source="27499" target="27481" cy:directed="1"/>
      <edge id="31099" label="1001000110 (1) 1101000110" source="27499" target="27493" cy:directed="1"/>
      <edge id="31098" label="1001100100 (1) 1001100000" source="27498" target="27663" cy:directed="1"/>
      <edge id="31097" label="1001100100 (1) 1001110100" source="27498" target="27444" cy:directed="1"/>
      <edge id="31096" label="1001100100 (1) 1011100100" source="27498" target="27480" cy:directed="1"/>
      <edge id="31095" label="1001100100 (1) 1101100100" source="27498" target="27492" cy:directed="1"/>
      <edge id="31094" label="1011000100 (1) 1011000110" source="27497" target="27481" cy:directed="1"/>
      <edge id="31093" label="1011000100 (1) 1011000000" source="27497" target="27675" cy:directed="1"/>
      <edge id="31092" label="1011000100 (1) 1011100100" source="27497" target="27480" cy:directed="1"/>
      <edge id="31091" label="1011000100 (1) 1010000100" source="27497" target="27551" cy:directed="1"/>
      <edge id="31090" label="1011000100 (1) 1111000100" source="27497" target="27479" cy:directed="1"/>
      <edge id="31089" label="0001000110 (1) 0001000010" source="27496" target="27681" cy:directed="1"/>
      <edge id="31088" label="0001000110 (1) 0001100110" source="27496" target="27075" cy:directed="1"/>
      <edge id="31087" label="0001000110 (1) 0011000110" source="27496" target="27478" cy:directed="1"/>
      <edge id="31086" label="0001100100 (1) 0001100000" source="27495" target="27658" cy:directed="1"/>
      <edge id="31085" label="0001100100 (1) 0001110100" source="27495" target="27440" cy:directed="1"/>
      <edge id="31084" label="0001100100 (1) 0011100100" source="27495" target="27477" cy:directed="1"/>
      <edge id="31083" label="0011000100 (1) 0011000110" source="27494" target="27478" cy:directed="1"/>
      <edge id="31082" label="0011000100 (1) 0011000000" source="27494" target="27672" cy:directed="1"/>
      <edge id="31081" label="0011000100 (1) 0011100100" source="27494" target="27477" cy:directed="1"/>
      <edge id="31080" label="0011000100 (1) 0010000100" source="27494" target="27542" cy:directed="1"/>
      <edge id="31079" label="1101000110 (1) 1101000010" source="27493" target="27679" cy:directed="1"/>
      <edge id="31078" label="1101000110 (1) 1101100110" source="27493" target="27064" cy:directed="1"/>
      <edge id="31077" label="1101100100 (1) 1101100000" source="27492" target="27678" cy:directed="1"/>
      <edge id="31076" label="1101100100 (1) 1101110100" source="27492" target="27429" cy:directed="1"/>
      <edge id="31075" label="1101100100 (1) 1111100100" source="27492" target="27473" cy:directed="1"/>
      <edge id="31074" label="0101000110 (1) 0101000010" source="27491" target="27677" cy:directed="1"/>
      <edge id="31073" label="0101000110 (1) 0101100110" source="27491" target="27062" cy:directed="1"/>
      <edge id="31072" label="0101000110 (1) 0001000110" source="27491" target="27496" cy:directed="1"/>
      <edge id="31071" label="0101100100 (1) 0101100000" source="27490" target="27676" cy:directed="1"/>
      <edge id="31070" label="0101100100 (1) 0101110100" source="27490" target="27428" cy:directed="1"/>
      <edge id="31069" label="0101100100 (1) 0111100100" source="27490" target="27470" cy:directed="1"/>
      <edge id="31068" label="0101100100 (1) 0001100100" source="27490" target="27495" cy:directed="1"/>
      <edge id="31067" label="1000011010 (1) 1000011110" source="27489" target="27195" cy:directed="1"/>
      <edge id="31066" label="1000011010 (1) 1000010010" source="27489" target="27644" cy:directed="1"/>
      <edge id="31065" label="1000011010 (1) 1000001010" source="27489" target="27600" cy:directed="1"/>
      <edge id="31064" label="1000011010 (1) 1001011010" source="27489" target="27454" cy:directed="1"/>
      <edge id="31063" label="1000011100 (1) 1000011110" source="27488" target="27195" cy:directed="1"/>
      <edge id="31062" label="1000011100 (1) 1000001100" source="27488" target="27359" cy:directed="1"/>
      <edge id="31061" label="1000011100 (1) 1001011100" source="27488" target="27453" cy:directed="1"/>
      <edge id="31060" label="1000011100 (1) 1010011100" source="27488" target="27467" cy:directed="1"/>
      <edge id="31059" label="0000011010 (1) 0000011110" source="27487" target="27188" cy:directed="1"/>
      <edge id="31058" label="0000011010 (1) 0000010010" source="27487" target="27638" cy:directed="1"/>
      <edge id="31057" label="0000011010 (1) 0000001010" source="27487" target="27596" cy:directed="1"/>
      <edge id="31056" label="0000011010 (1) 0001011010" source="27487" target="27452" cy:directed="1"/>
      <edge id="31055" label="0000011100 (1) 0000011110" source="27486" target="27188" cy:directed="1"/>
      <edge id="31054" label="0000011100 (1) 0000001100" source="27486" target="27354" cy:directed="1"/>
      <edge id="31053" label="0000011100 (1) 0001011100" source="27486" target="27451" cy:directed="1"/>
      <edge id="31052" label="0000011100 (1) 0010011100" source="27486" target="27465" cy:directed="1"/>
      <edge id="31051" label="0011101000 (1) 0011100000" source="27485" target="27640" cy:directed="1"/>
      <edge id="31050" label="0011101000 (1) 0011111000" source="27485" target="27507" cy:directed="1"/>
      <edge id="31049" label="0011101000 (1) 0011001000" source="27485" target="27541" cy:directed="1"/>
      <edge id="31048" label="0011101000 (1) 0010101000" source="27485" target="27521" cy:directed="1"/>
      <edge id="31047" label="1011101000 (1) 1011100000" source="27484" target="27646" cy:directed="1"/>
      <edge id="31046" label="1011101000 (1) 1011111000" source="27484" target="27510" cy:directed="1"/>
      <edge id="31045" label="1011101000 (1) 1011001000" source="27484" target="27549" cy:directed="1"/>
      <edge id="31044" label="1011101000 (1) 1010101000" source="27484" target="27518" cy:directed="1"/>
      <edge id="31043" label="1011101000 (1) 1111101000" source="27484" target="27534" cy:directed="1"/>
      <edge id="31042" label="1100011010 (1) 1100011110" source="27483" target="27177" cy:directed="1"/>
      <edge id="31041" label="1100011010 (1) 1100010010" source="27483" target="27633" cy:directed="1"/>
      <edge id="31040" label="1100011010 (1) 1100001010" source="27483" target="27594" cy:directed="1"/>
      <edge id="31039" label="1100011010 (1) 1101011010" source="27483" target="27449" cy:directed="1"/>
      <edge id="31038" label="1100011010 (1) 1000011010" source="27483" target="27489" cy:directed="1"/>
      <edge id="31037" label="1100011100 (1) 1100011110" source="27482" target="27177" cy:directed="1"/>
      <edge id="31036" label="1100011100 (1) 1100001100" source="27482" target="27355" cy:directed="1"/>
      <edge id="31035" label="1100011100 (1) 1101011100" source="27482" target="27448" cy:directed="1"/>
      <edge id="31034" label="1100011100 (1) 1000011100" source="27482" target="27488" cy:directed="1"/>
      <edge id="31033" label="1011000110 (1) 1011000010" source="27481" target="27674" cy:directed="1"/>
      <edge id="31032" label="1011000110 (1) 1011100110" source="27481" target="27048" cy:directed="1"/>
      <edge id="31031" label="1011000110 (1) 1010000110" source="27481" target="27516" cy:directed="1"/>
      <edge id="31030" label="1011000110 (1) 1111000110" source="27481" target="27474" cy:directed="1"/>
      <edge id="31029" label="1011100100 (1) 1011100000" source="27480" target="27646" cy:directed="1"/>
      <edge id="31028" label="1011100100 (1) 1011110100" source="27480" target="27413" cy:directed="1"/>
      <edge id="31027" label="1011100100 (1) 1010100100" source="27480" target="27515" cy:directed="1"/>
      <edge id="31026" label="1011100100 (1) 1111100100" source="27480" target="27473" cy:directed="1"/>
      <edge id="31025" label="1111000100 (1) 1111000110" source="27479" target="27474" cy:directed="1"/>
      <edge id="31024" label="1111000100 (1) 1111000000" source="27479" target="27673" cy:directed="1"/>
      <edge id="31023" label="1111000100 (1) 1111100100" source="27479" target="27473" cy:directed="1"/>
      <edge id="31022" label="1111000100 (1) 1110000100" source="27479" target="27514" cy:directed="1"/>
      <edge id="31021" label="1111000100 (1) 1101000100" source="27479" target="27536" cy:directed="1"/>
      <edge id="31020" label="0011000110 (1) 0011000010" source="27478" target="27671" cy:directed="1"/>
      <edge id="31019" label="0011000110 (1) 0011100110" source="27478" target="27043" cy:directed="1"/>
      <edge id="31018" label="0011000110 (1) 0010000110" source="27478" target="27513" cy:directed="1"/>
      <edge id="31017" label="0011100100 (1) 0011100000" source="27477" target="27640" cy:directed="1"/>
      <edge id="31016" label="0011100100 (1) 0011110100" source="27477" target="27412" cy:directed="1"/>
      <edge id="31015" label="0011100100 (1) 0010100100" source="27477" target="27512" cy:directed="1"/>
      <edge id="31014" label="0100011010 (1) 0100011110" source="27476" target="27176" cy:directed="1"/>
      <edge id="31013" label="0100011010 (1) 0100010010" source="27476" target="27628" cy:directed="1"/>
      <edge id="31012" label="0100011010 (1) 0100001010" source="27476" target="27591" cy:directed="1"/>
      <edge id="31011" label="0100011010 (1) 0101011010" source="27476" target="27447" cy:directed="1"/>
      <edge id="31010" label="0100011010 (1) 0000011010" source="27476" target="27487" cy:directed="1"/>
      <edge id="31009" label="0100011100 (1) 0100011110" source="27475" target="27176" cy:directed="1"/>
      <edge id="31008" label="0100011100 (1) 0100001100" source="27475" target="27337" cy:directed="1"/>
      <edge id="31007" label="0100011100 (1) 0101011100" source="27475" target="27446" cy:directed="1"/>
      <edge id="31006" label="0100011100 (1) 0000011100" source="27475" target="27486" cy:directed="1"/>
      <edge id="31005" label="1111000110 (1) 1111000010" source="27474" target="27670" cy:directed="1"/>
      <edge id="31004" label="1111000110 (1) 1111100110" source="27474" target="27039" cy:directed="1"/>
      <edge id="31003" label="1111000110 (1) 1110000110" source="27474" target="27509" cy:directed="1"/>
      <edge id="31002" label="1111000110 (1) 1101000110" source="27474" target="27493" cy:directed="1"/>
      <edge id="31001" label="1111100100 (1) 1111100000" source="27473" target="27669" cy:directed="1"/>
      <edge id="31000" label="1111100100 (1) 1111110100" source="27473" target="27407" cy:directed="1"/>
      <edge id="30999" label="1111100100 (1) 1110100100" source="27473" target="27508" cy:directed="1"/>
      <edge id="30998" label="0111000100 (1) 0111000110" source="27472" target="27471" cy:directed="1"/>
      <edge id="30997" label="0111000100 (1) 0111000000" source="27472" target="27668" cy:directed="1"/>
      <edge id="30996" label="0111000100 (1) 0111100100" source="27472" target="27470" cy:directed="1"/>
      <edge id="30995" label="0111000100 (1) 0110000100" source="27472" target="27506" cy:directed="1"/>
      <edge id="30994" label="0111000100 (1) 0101000100" source="27472" target="27529" cy:directed="1"/>
      <edge id="30993" label="0111000100 (1) 0011000100" source="27472" target="27494" cy:directed="1"/>
      <edge id="30992" label="0111000110 (1) 0111000010" source="27471" target="27667" cy:directed="1"/>
      <edge id="30991" label="0111000110 (1) 0111100110" source="27471" target="27038" cy:directed="1"/>
      <edge id="30990" label="0111000110 (1) 0110000110" source="27471" target="27505" cy:directed="1"/>
      <edge id="30989" label="0111000110 (1) 0101000110" source="27471" target="27491" cy:directed="1"/>
      <edge id="30988" label="0111000110 (1) 0011000110" source="27471" target="27478" cy:directed="1"/>
      <edge id="30987" label="0111100100 (1) 0111100000" source="27470" target="27666" cy:directed="1"/>
      <edge id="30986" label="0111100100 (1) 0111110100" source="27470" target="27406" cy:directed="1"/>
      <edge id="30985" label="0111100100 (1) 0110100100" source="27470" target="27504" cy:directed="1"/>
      <edge id="30984" label="0111100100 (1) 0011100100" source="27470" target="27477" cy:directed="1"/>
      <edge id="30983" label="1000110100 (1) 1000110000" source="27469" target="27664" cy:directed="1"/>
      <edge id="30982" label="1000110100 (1) 1000111100" source="27469" target="27417" cy:directed="1"/>
      <edge id="30981" label="1000110100 (1) 1001110100" source="27469" target="27444" cy:directed="1"/>
      <edge id="30980" label="1000110100 (1) 1010110100" source="27469" target="27457" cy:directed="1"/>
      <edge id="30979" label="1010011010 (1) 1010011110" source="27468" target="27160" cy:directed="1"/>
      <edge id="30978" label="1010011010 (1) 1010010010" source="27468" target="27623" cy:directed="1"/>
      <edge id="30977" label="1010011010 (1) 1010001010" source="27468" target="27576" cy:directed="1"/>
      <edge id="30976" label="1010011010 (1) 1000011010" source="27468" target="27489" cy:directed="1"/>
      <edge id="30975" label="1010011100 (1) 1010011110" source="27467" target="27160" cy:directed="1"/>
      <edge id="30974" label="1010011100 (1) 1010001100" source="27467" target="27356" cy:directed="1"/>
      <edge id="30973" label="0010011010 (1) 0010011110" source="27466" target="27161" cy:directed="1"/>
      <edge id="30972" label="0010011010 (1) 0010010010" source="27466" target="27619" cy:directed="1"/>
      <edge id="30971" label="0010011010 (1) 0010001010" source="27466" target="27573" cy:directed="1"/>
      <edge id="30970" label="0010011010 (1) 0000011010" source="27466" target="27487" cy:directed="1"/>
      <edge id="30969" label="0010011100 (1) 0010011110" source="27465" target="27161" cy:directed="1"/>
      <edge id="30968" label="0010011100 (1) 0010001100" source="27465" target="27351" cy:directed="1"/>
      <edge id="30967" label="0000110100 (1) 0000110000" source="27464" target="27659" cy:directed="1"/>
      <edge id="30966" label="0000110100 (1) 0000111100" source="27464" target="27416" cy:directed="1"/>
      <edge id="30965" label="0000110100 (1) 0001110100" source="27464" target="27440" cy:directed="1"/>
      <edge id="30964" label="0000110100 (1) 0010110100" source="27464" target="27456" cy:directed="1"/>
      <edge id="30963" label="1110011010 (1) 1110011110" source="27463" target="27155" cy:directed="1"/>
      <edge id="30962" label="1110011010 (1) 1110010010" source="27463" target="27615" cy:directed="1"/>
      <edge id="30961" label="1110011010 (1) 1110001010" source="27463" target="27571" cy:directed="1"/>
      <edge id="30960" label="1110011010 (1) 1100011010" source="27463" target="27483" cy:directed="1"/>
      <edge id="30959" label="1110011010 (1) 1010011010" source="27463" target="27468" cy:directed="1"/>
      <edge id="30958" label="1110011100 (1) 1110011110" source="27462" target="27155" cy:directed="1"/>
      <edge id="30957" label="1110011100 (1) 1110001100" source="27462" target="27320" cy:directed="1"/>
      <edge id="30956" label="1110011100 (1) 1100011100" source="27462" target="27482" cy:directed="1"/>
      <edge id="30955" label="1110011100 (1) 1010011100" source="27462" target="27467" cy:directed="1"/>
      <edge id="30954" label="1100110100 (1) 1100110000" source="27461" target="27656" cy:directed="1"/>
      <edge id="30953" label="1100110100 (1) 1100111100" source="27461" target="27414" cy:directed="1"/>
      <edge id="30952" label="1100110100 (1) 1101110100" source="27461" target="27429" cy:directed="1"/>
      <edge id="30951" label="1100110100 (1) 1110110100" source="27461" target="27455" cy:directed="1"/>
      <edge id="30950" label="1100110100 (1) 1000110100" source="27461" target="27469" cy:directed="1"/>
      <edge id="30949" label="0110011010 (1) 0110011110" source="27460" target="27154" cy:directed="1"/>
      <edge id="30948" label="0110011010 (1) 0110010010" source="27460" target="27611" cy:directed="1"/>
      <edge id="30947" label="0110011010 (1) 0110001010" source="27460" target="27568" cy:directed="1"/>
      <edge id="30946" label="0110011010 (1) 0100011010" source="27460" target="27476" cy:directed="1"/>
      <edge id="30945" label="0110011010 (1) 0010011010" source="27460" target="27466" cy:directed="1"/>
      <edge id="30944" label="0110011100 (1) 0110011110" source="27459" target="27154" cy:directed="1"/>
      <edge id="30943" label="0110011100 (1) 0110001100" source="27459" target="27314" cy:directed="1"/>
      <edge id="30942" label="0110011100 (1) 0100011100" source="27459" target="27475" cy:directed="1"/>
      <edge id="30941" label="0110011100 (1) 0010011100" source="27459" target="27465" cy:directed="1"/>
      <edge id="30940" label="0100110100 (1) 0100110000" source="27458" target="27654" cy:directed="1"/>
      <edge id="30939" label="0100110100 (1) 0100111100" source="27458" target="27411" cy:directed="1"/>
      <edge id="30938" label="0100110100 (1) 0101110100" source="27458" target="27428" cy:directed="1"/>
      <edge id="30937" label="0100110100 (1) 0110110100" source="27458" target="27450" cy:directed="1"/>
      <edge id="30936" label="0100110100 (1) 0000110100" source="27458" target="27464" cy:directed="1"/>
      <edge id="30935" label="1010110100 (1) 1010110000" source="27457" target="27653" cy:directed="1"/>
      <edge id="30934" label="1010110100 (1) 1010111100" source="27457" target="27392" cy:directed="1"/>
      <edge id="30933" label="0010110100 (1) 0010110000" source="27456" target="27651" cy:directed="1"/>
      <edge id="30932" label="0010110100 (1) 0010111100" source="27456" target="27390" cy:directed="1"/>
      <edge id="30931" label="1110110100 (1) 1110110000" source="27455" target="27650" cy:directed="1"/>
      <edge id="30930" label="1110110100 (1) 1110111100" source="27455" target="27378" cy:directed="1"/>
      <edge id="30929" label="1110110100 (1) 1010110100" source="27455" target="27457" cy:directed="1"/>
      <edge id="30928" label="1001011010 (1) 1001011110" source="27454" target="27109" cy:directed="1"/>
      <edge id="30927" label="1001011010 (1) 1001010010" source="27454" target="27609" cy:directed="1"/>
      <edge id="30926" label="1001011010 (1) 1001001010" source="27454" target="27564" cy:directed="1"/>
      <edge id="30925" label="1001011100 (1) 1001011110" source="27453" target="27109" cy:directed="1"/>
      <edge id="30924" label="1001011100 (1) 1001001100" source="27453" target="27357" cy:directed="1"/>
      <edge id="30923" label="1001011100 (1) 1011011100" source="27453" target="27442" cy:directed="1"/>
      <edge id="30922" label="0001011010 (1) 0001011110" source="27452" target="27108" cy:directed="1"/>
      <edge id="30921" label="0001011010 (1) 0001010010" source="27452" target="27607" cy:directed="1"/>
      <edge id="30920" label="0001011010 (1) 0001001010" source="27452" target="27562" cy:directed="1"/>
      <edge id="30919" label="0001011100 (1) 0001011110" source="27451" target="27108" cy:directed="1"/>
      <edge id="30918" label="0001011100 (1) 0001001100" source="27451" target="27352" cy:directed="1"/>
      <edge id="30917" label="0001011100 (1) 0011011100" source="27451" target="27438" cy:directed="1"/>
      <edge id="30916" label="0110110100 (1) 0110110000" source="27450" target="27648" cy:directed="1"/>
      <edge id="30915" label="0110110100 (1) 0110111100" source="27450" target="27377" cy:directed="1"/>
      <edge id="30914" label="0110110100 (1) 0010110100" source="27450" target="27456" cy:directed="1"/>
      <edge id="30913" label="1101011010 (1) 1101011110" source="27449" target="27099" cy:directed="1"/>
      <edge id="30912" label="1101011010 (1) 1101010010" source="27449" target="27605" cy:directed="1"/>
      <edge id="30911" label="1101011010 (1) 1101001010" source="27449" target="27560" cy:directed="1"/>
      <edge id="30910" label="1101011010 (1) 1101111010" source="27449" target="27051" cy:directed="1"/>
      <edge id="30909" label="1101011010 (1) 1001011010" source="27449" target="27454" cy:directed="1"/>
      <edge id="30908" label="1101011100 (1) 1101011110" source="27448" target="27099" cy:directed="1"/>
      <edge id="30907" label="1101011100 (1) 1101001100" source="27448" target="27339" cy:directed="1"/>
      <edge id="30906" label="1101011100 (1) 1101111100" source="27448" target="27329" cy:directed="1"/>
      <edge id="30905" label="1101011100 (1) 1001011100" source="27448" target="27453" cy:directed="1"/>
      <edge id="30904" label="0101011010 (1) 0101011110" source="27447" target="27097" cy:directed="1"/>
      <edge id="30903" label="0101011010 (1) 0101010010" source="27447" target="27603" cy:directed="1"/>
      <edge id="30902" label="0101011010 (1) 0101001010" source="27447" target="27557" cy:directed="1"/>
      <edge id="30901" label="0101011010 (1) 0101111010" source="27447" target="27040" cy:directed="1"/>
      <edge id="30900" label="0101011010 (1) 0001011010" source="27447" target="27452" cy:directed="1"/>
      <edge id="30899" label="0101011100 (1) 0101011110" source="27446" target="27097" cy:directed="1"/>
      <edge id="30898" label="0101011100 (1) 0101001100" source="27446" target="27335" cy:directed="1"/>
      <edge id="30897" label="0101011100 (1) 0101111100" source="27446" target="27328" cy:directed="1"/>
      <edge id="30896" label="0101011100 (1) 0001011100" source="27446" target="27451" cy:directed="1"/>
      <edge id="30895" label="1101100010 (1) 1101100000" source="27445" target="27678" cy:directed="1"/>
      <edge id="30894" label="1101100010 (1) 1101110010" source="27445" target="27310" cy:directed="1"/>
      <edge id="30893" label="1001110100 (1) 1001110000" source="27444" target="27647" cy:directed="1"/>
      <edge id="30892" label="1001110100 (1) 1001111100" source="27444" target="27341" cy:directed="1"/>
      <edge id="30891" label="1001110100 (1) 1011110100" source="27444" target="27413" cy:directed="1"/>
      <edge id="30890" label="1011011010 (1) 1011011110" source="27443" target="27065" cy:directed="1"/>
      <edge id="30889" label="1011011010 (1) 1011010010" source="27443" target="27588" cy:directed="1"/>
      <edge id="30888" label="1011011010 (1) 1011001010" source="27443" target="27548" cy:directed="1"/>
      <edge id="30887" label="1011011010 (1) 1010011010" source="27443" target="27468" cy:directed="1"/>
      <edge id="30886" label="1011011010 (1) 1001011010" source="27443" target="27454" cy:directed="1"/>
      <edge id="30885" label="1011011100 (1) 1011011110" source="27442" target="27065" cy:directed="1"/>
      <edge id="30884" label="1011011100 (1) 1011001100" source="27442" target="27290" cy:directed="1"/>
      <edge id="30883" label="1011011100 (1) 1010011100" source="27442" target="27467" cy:directed="1"/>
      <edge id="30882" label="0101100010 (1) 0101100000" source="27441" target="27676" cy:directed="1"/>
      <edge id="30881" label="0101100010 (1) 0101110010" source="27441" target="27304" cy:directed="1"/>
      <edge id="30880" label="0101100010 (1) 0001100010" source="27441" target="27394" cy:directed="1"/>
      <edge id="30879" label="0001110100 (1) 0001110000" source="27440" target="27641" cy:directed="1"/>
      <edge id="30878" label="0001110100 (1) 0001111100" source="27440" target="27338" cy:directed="1"/>
      <edge id="30877" label="0001110100 (1) 0011110100" source="27440" target="27412" cy:directed="1"/>
      <edge id="30876" label="0011011010 (1) 0011011110" source="27439" target="27063" cy:directed="1"/>
      <edge id="30875" label="0011011010 (1) 0011010010" source="27439" target="27585" cy:directed="1"/>
      <edge id="30874" label="0011011010 (1) 0011001010" source="27439" target="27540" cy:directed="1"/>
      <edge id="30873" label="0011011010 (1) 0010011010" source="27439" target="27466" cy:directed="1"/>
      <edge id="30872" label="0011011010 (1) 0001011010" source="27439" target="27452" cy:directed="1"/>
      <edge id="30871" label="0011011100 (1) 0011011110" source="27438" target="27063" cy:directed="1"/>
      <edge id="30870" label="0011011100 (1) 0011001100" source="27438" target="27288" cy:directed="1"/>
      <edge id="30869" label="0011011100 (1) 0010011100" source="27438" target="27465" cy:directed="1"/>
      <edge id="30868" label="0000010100 (1) 0000010110" source="27437" target="27436" cy:directed="1"/>
      <edge id="30867" label="0000010100 (1) 0000010000" source="27437" target="27639" cy:directed="1"/>
      <edge id="30866" label="0000010100 (1) 0000011100" source="27437" target="27486" cy:directed="1"/>
      <edge id="30865" label="0000010100 (1) 0000000100" source="27437" target="27546" cy:directed="1"/>
      <edge id="30864" label="0000010100 (1) 0000110100" source="27437" target="27464" cy:directed="1"/>
      <edge id="30863" label="0000010100 (1) 0001010100" source="27437" target="27435" cy:directed="1"/>
      <edge id="30862" label="0000010100 (1) 0010010100" source="27437" target="27434" cy:directed="1"/>
      <edge id="30861" label="0000010110 (1) 0000010010" source="27436" target="27638" cy:directed="1"/>
      <edge id="30860" label="0000010110 (1) 0000000110" source="27436" target="27545" cy:directed="1"/>
      <edge id="30859" label="0000010110 (1) 0000110110" source="27436" target="27026" cy:directed="1"/>
      <edge id="30858" label="0000010110 (1) 0001010110" source="27436" target="27369" cy:directed="1"/>
      <edge id="30857" label="0000010110 (1) 0010010110" source="27436" target="27409" cy:directed="1"/>
      <edge id="30856" label="0001010100 (1) 0001010110" source="27435" target="27369" cy:directed="1"/>
      <edge id="30855" label="0001010100 (1) 0001010000" source="27435" target="27636" cy:directed="1"/>
      <edge id="30854" label="0001010100 (1) 0001011100" source="27435" target="27451" cy:directed="1"/>
      <edge id="30853" label="0001010100 (1) 0001000100" source="27435" target="27543" cy:directed="1"/>
      <edge id="30852" label="0001010100 (1) 0001110100" source="27435" target="27440" cy:directed="1"/>
      <edge id="30851" label="0001010100 (1) 0011010100" source="27435" target="27368" cy:directed="1"/>
      <edge id="30850" label="0010010100 (1) 0010010110" source="27434" target="27409" cy:directed="1"/>
      <edge id="30849" label="0010010100 (1) 0010010000" source="27434" target="27620" cy:directed="1"/>
      <edge id="30848" label="0010010100 (1) 0010011100" source="27434" target="27465" cy:directed="1"/>
      <edge id="30847" label="0010010100 (1) 0010000100" source="27434" target="27542" cy:directed="1"/>
      <edge id="30846" label="0010010100 (1) 0010110100" source="27434" target="27456" cy:directed="1"/>
      <edge id="30845" label="1000010100 (1) 1000010110" source="27433" target="27432" cy:directed="1"/>
      <edge id="30844" label="1000010100 (1) 1000010000" source="27433" target="27645" cy:directed="1"/>
      <edge id="30843" label="1000010100 (1) 1000011100" source="27433" target="27488" cy:directed="1"/>
      <edge id="30842" label="1000010100 (1) 1000000100" source="27433" target="27555" cy:directed="1"/>
      <edge id="30841" label="1000010100 (1) 1000110100" source="27433" target="27469" cy:directed="1"/>
      <edge id="30840" label="1000010100 (1) 1001010100" source="27433" target="27431" cy:directed="1"/>
      <edge id="30839" label="1000010100 (1) 1010010100" source="27433" target="27430" cy:directed="1"/>
      <edge id="30838" label="1000010110 (1) 1000010010" source="27432" target="27644" cy:directed="1"/>
      <edge id="30837" label="1000010110 (1) 1000000110" source="27432" target="27554" cy:directed="1"/>
      <edge id="30836" label="1000010110 (1) 1000110110" source="27432" target="27027" cy:directed="1"/>
      <edge id="30835" label="1000010110 (1) 1001010110" source="27432" target="27367" cy:directed="1"/>
      <edge id="30834" label="1000010110 (1) 1010010110" source="27432" target="27408" cy:directed="1"/>
      <edge id="30833" label="1001010100 (1) 1001010110" source="27431" target="27367" cy:directed="1"/>
      <edge id="30832" label="1001010100 (1) 1001010000" source="27431" target="27642" cy:directed="1"/>
      <edge id="30831" label="1001010100 (1) 1001011100" source="27431" target="27453" cy:directed="1"/>
      <edge id="30830" label="1001010100 (1) 1001000100" source="27431" target="27552" cy:directed="1"/>
      <edge id="30829" label="1001010100 (1) 1001110100" source="27431" target="27444" cy:directed="1"/>
      <edge id="30828" label="1001010100 (1) 1011010100" source="27431" target="27366" cy:directed="1"/>
      <edge id="30827" label="1010010100 (1) 1010010110" source="27430" target="27408" cy:directed="1"/>
      <edge id="30826" label="1010010100 (1) 1010010000" source="27430" target="27624" cy:directed="1"/>
      <edge id="30825" label="1010010100 (1) 1010011100" source="27430" target="27467" cy:directed="1"/>
      <edge id="30824" label="1010010100 (1) 1010000100" source="27430" target="27551" cy:directed="1"/>
      <edge id="30823" label="1010010100 (1) 1010110100" source="27430" target="27457" cy:directed="1"/>
      <edge id="30822" label="1101110100 (1) 1101110000" source="27429" target="27635" cy:directed="1"/>
      <edge id="30821" label="1101110100 (1) 1101111100" source="27429" target="27329" cy:directed="1"/>
      <edge id="30820" label="1101110100 (1) 1111110100" source="27429" target="27407" cy:directed="1"/>
      <edge id="30819" label="1101110100 (1) 1001110100" source="27429" target="27444" cy:directed="1"/>
      <edge id="30818" label="0101110100 (1) 0101110000" source="27428" target="27630" cy:directed="1"/>
      <edge id="30817" label="0101110100 (1) 0101111100" source="27428" target="27328" cy:directed="1"/>
      <edge id="30816" label="0101110100 (1) 0111110100" source="27428" target="27406" cy:directed="1"/>
      <edge id="30815" label="0101110100 (1) 0001110100" source="27428" target="27440" cy:directed="1"/>
      <edge id="30814" label="0111011010 (1) 0111011110" source="27427" target="27057" cy:directed="1"/>
      <edge id="30813" label="0111011010 (1) 0111010010" source="27427" target="27582" cy:directed="1"/>
      <edge id="30812" label="0111011010 (1) 0111001010" source="27427" target="27527" cy:directed="1"/>
      <edge id="30811" label="0111011010 (1) 0111111010" source="27427" target="27020" cy:directed="1"/>
      <edge id="30810" label="0111011010 (1) 0110011010" source="27427" target="27460" cy:directed="1"/>
      <edge id="30809" label="0111011010 (1) 0101011010" source="27427" target="27447" cy:directed="1"/>
      <edge id="30808" label="0111011010 (1) 0011011010" source="27427" target="27439" cy:directed="1"/>
      <edge id="30807" label="0111011100 (1) 0111011110" source="27426" target="27057" cy:directed="1"/>
      <edge id="30806" label="0111011100 (1) 0111001100" source="27426" target="27248" cy:directed="1"/>
      <edge id="30805" label="0111011100 (1) 0111111100" source="27426" target="27302" cy:directed="1"/>
      <edge id="30804" label="0111011100 (1) 0110011100" source="27426" target="27459" cy:directed="1"/>
      <edge id="30803" label="0111011100 (1) 0101011100" source="27426" target="27446" cy:directed="1"/>
      <edge id="30802" label="0111011100 (1) 0011011100" source="27426" target="27438" cy:directed="1"/>
      <edge id="30801" label="1111011010 (1) 1111011110" source="27425" target="27056" cy:directed="1"/>
      <edge id="30800" label="1111011010 (1) 1111010010" source="27425" target="27579" cy:directed="1"/>
      <edge id="30799" label="1111011010 (1) 1111001010" source="27425" target="27535" cy:directed="1"/>
      <edge id="30798" label="1111011010 (1) 1111111010" source="27425" target="27022" cy:directed="1"/>
      <edge id="30797" label="1111011010 (1) 1110011010" source="27425" target="27463" cy:directed="1"/>
      <edge id="30796" label="1111011010 (1) 1101011010" source="27425" target="27449" cy:directed="1"/>
      <edge id="30795" label="1111011010 (1) 1011011010" source="27425" target="27443" cy:directed="1"/>
      <edge id="30794" label="1111011100 (1) 1111011110" source="27424" target="27056" cy:directed="1"/>
      <edge id="30793" label="1111011100 (1) 1111001100" source="27424" target="27257" cy:directed="1"/>
      <edge id="30792" label="1111011100 (1) 1111111100" source="27424" target="27303" cy:directed="1"/>
      <edge id="30791" label="1111011100 (1) 1110011100" source="27424" target="27462" cy:directed="1"/>
      <edge id="30790" label="1111011100 (1) 1101011100" source="27424" target="27448" cy:directed="1"/>
      <edge id="30789" label="1111011100 (1) 1011011100" source="27424" target="27442" cy:directed="1"/>
      <edge id="30788" label="0100010100 (1) 0100010110" source="27423" target="27422" cy:directed="1"/>
      <edge id="30787" label="0100010100 (1) 0100010000" source="27423" target="27629" cy:directed="1"/>
      <edge id="30786" label="0100010100 (1) 0100011100" source="27423" target="27475" cy:directed="1"/>
      <edge id="30785" label="0100010100 (1) 0100000100" source="27423" target="27532" cy:directed="1"/>
      <edge id="30784" label="0100010100 (1) 0100110100" source="27423" target="27458" cy:directed="1"/>
      <edge id="30783" label="0100010100 (1) 0101010100" source="27423" target="27421" cy:directed="1"/>
      <edge id="30782" label="0100010100 (1) 0000010100" source="27423" target="27437" cy:directed="1"/>
      <edge id="30781" label="0100010110 (1) 0100010010" source="27422" target="27628" cy:directed="1"/>
      <edge id="30780" label="0100010110 (1) 0100000110" source="27422" target="27531" cy:directed="1"/>
      <edge id="30779" label="0100010110 (1) 0100110110" source="27422" target="27014" cy:directed="1"/>
      <edge id="30778" label="0100010110 (1) 0101010110" source="27422" target="27362" cy:directed="1"/>
      <edge id="30777" label="0100010110 (1) 0000010110" source="27422" target="27436" cy:directed="1"/>
      <edge id="30776" label="0101010100 (1) 0101010110" source="27421" target="27362" cy:directed="1"/>
      <edge id="30775" label="0101010100 (1) 0101010000" source="27421" target="27626" cy:directed="1"/>
      <edge id="30774" label="0101010100 (1) 0101011100" source="27421" target="27446" cy:directed="1"/>
      <edge id="30773" label="0101010100 (1) 0101000100" source="27421" target="27529" cy:directed="1"/>
      <edge id="30772" label="0101010100 (1) 0101110100" source="27421" target="27428" cy:directed="1"/>
      <edge id="30771" label="0101010100 (1) 0001010100" source="27421" target="27435" cy:directed="1"/>
      <edge id="30770" label="1100010100 (1) 1100010110" source="27420" target="27419" cy:directed="1"/>
      <edge id="30769" label="1100010100 (1) 1100010000" source="27420" target="27634" cy:directed="1"/>
      <edge id="30768" label="1100010100 (1) 1100011100" source="27420" target="27482" cy:directed="1"/>
      <edge id="30767" label="1100010100 (1) 1100000100" source="27420" target="27550" cy:directed="1"/>
      <edge id="30766" label="1100010100 (1) 1100110100" source="27420" target="27461" cy:directed="1"/>
      <edge id="30765" label="1100010100 (1) 1101010100" source="27420" target="27418" cy:directed="1"/>
      <edge id="30764" label="1100010100 (1) 1000010100" source="27420" target="27433" cy:directed="1"/>
      <edge id="30763" label="1100010110 (1) 1100010010" source="27419" target="27633" cy:directed="1"/>
      <edge id="30762" label="1100010110 (1) 1100000110" source="27419" target="27538" cy:directed="1"/>
      <edge id="30761" label="1100010110 (1) 1100110110" source="27419" target="27023" cy:directed="1"/>
      <edge id="30760" label="1100010110 (1) 1101010110" source="27419" target="27361" cy:directed="1"/>
      <edge id="30759" label="1100010110 (1) 1000010110" source="27419" target="27432" cy:directed="1"/>
      <edge id="30758" label="1101010100 (1) 1101010110" source="27418" target="27361" cy:directed="1"/>
      <edge id="30757" label="1101010100 (1) 1101010000" source="27418" target="27631" cy:directed="1"/>
      <edge id="30756" label="1101010100 (1) 1101011100" source="27418" target="27448" cy:directed="1"/>
      <edge id="30755" label="1101010100 (1) 1101000100" source="27418" target="27536" cy:directed="1"/>
      <edge id="30754" label="1101010100 (1) 1101110100" source="27418" target="27429" cy:directed="1"/>
      <edge id="30753" label="1101010100 (1) 1001010100" source="27418" target="27431" cy:directed="1"/>
      <edge id="30752" label="1000111100 (1) 1000011100" source="27417" target="27488" cy:directed="1"/>
      <edge id="30751" label="1000111100 (1) 1001111100" source="27417" target="27341" cy:directed="1"/>
      <edge id="30750" label="1000111100 (1) 1010111100" source="27417" target="27392" cy:directed="1"/>
      <edge id="30749" label="0000111100 (1) 0000011100" source="27416" target="27486" cy:directed="1"/>
      <edge id="30748" label="0000111100 (1) 0001111100" source="27416" target="27338" cy:directed="1"/>
      <edge id="30747" label="0000111100 (1) 0010111100" source="27416" target="27390" cy:directed="1"/>
      <edge id="30746" label="1111100010 (1) 1111100000" source="27415" target="27669" cy:directed="1"/>
      <edge id="30745" label="1111100010 (1) 1111110010" source="27415" target="27292" cy:directed="1"/>
      <edge id="30744" label="1111100010 (1) 1110100010" source="27415" target="27364" cy:directed="1"/>
      <edge id="30743" label="1111100010 (1) 1101100010" source="27415" target="27445" cy:directed="1"/>
      <edge id="30742" label="1100111100 (1) 1100011100" source="27414" target="27482" cy:directed="1"/>
      <edge id="30741" label="1100111100 (1) 1101111100" source="27414" target="27329" cy:directed="1"/>
      <edge id="30740" label="1100111100 (1) 1110111100" source="27414" target="27378" cy:directed="1"/>
      <edge id="30739" label="1100111100 (1) 1000111100" source="27414" target="27417" cy:directed="1"/>
      <edge id="30738" label="1011110100 (1) 1011110000" source="27413" target="27625" cy:directed="1"/>
      <edge id="30737" label="1011110100 (1) 1011111100" source="27413" target="27306" cy:directed="1"/>
      <edge id="30736" label="1011110100 (1) 1010110100" source="27413" target="27457" cy:directed="1"/>
      <edge id="30735" label="0011110100 (1) 0011110000" source="27412" target="27621" cy:directed="1"/>
      <edge id="30734" label="0011110100 (1) 0011111100" source="27412" target="27309" cy:directed="1"/>
      <edge id="30733" label="0011110100 (1) 0010110100" source="27412" target="27456" cy:directed="1"/>
      <edge id="30732" label="0100111100 (1) 0100011100" source="27411" target="27475" cy:directed="1"/>
      <edge id="30731" label="0100111100 (1) 0101111100" source="27411" target="27328" cy:directed="1"/>
      <edge id="30730" label="0100111100 (1) 0110111100" source="27411" target="27377" cy:directed="1"/>
      <edge id="30729" label="0100111100 (1) 0000111100" source="27411" target="27416" cy:directed="1"/>
      <edge id="30728" label="0111100010 (1) 0111100000" source="27410" target="27666" cy:directed="1"/>
      <edge id="30727" label="0111100010 (1) 0111110010" source="27410" target="27293" cy:directed="1"/>
      <edge id="30726" label="0111100010 (1) 0110100010" source="27410" target="27350" cy:directed="1"/>
      <edge id="30725" label="0111100010 (1) 0101100010" source="27410" target="27441" cy:directed="1"/>
      <edge id="30724" label="0111100010 (1) 0011100010" source="27410" target="27315" cy:directed="1"/>
      <edge id="30723" label="0010010110 (1) 0010010010" source="27409" target="27619" cy:directed="1"/>
      <edge id="30722" label="0010010110 (1) 0010000110" source="27409" target="27513" cy:directed="1"/>
      <edge id="30721" label="0010010110 (1) 0010110110" source="27409" target="26992" cy:directed="1"/>
      <edge id="30720" label="1010010110 (1) 1010010010" source="27408" target="27623" cy:directed="1"/>
      <edge id="30719" label="1010010110 (1) 1010000110" source="27408" target="27516" cy:directed="1"/>
      <edge id="30718" label="1010010110 (1) 1010110110" source="27408" target="26993" cy:directed="1"/>
      <edge id="30717" label="1111110100 (1) 1111110000" source="27407" target="27617" cy:directed="1"/>
      <edge id="30716" label="1111110100 (1) 1111111100" source="27407" target="27303" cy:directed="1"/>
      <edge id="30715" label="1111110100 (1) 1110110100" source="27407" target="27455" cy:directed="1"/>
      <edge id="30714" label="1111110100 (1) 1011110100" source="27407" target="27413" cy:directed="1"/>
      <edge id="30713" label="0111110100 (1) 0111110000" source="27406" target="27613" cy:directed="1"/>
      <edge id="30712" label="0111110100 (1) 0111111100" source="27406" target="27302" cy:directed="1"/>
      <edge id="30711" label="0111110100 (1) 0110110100" source="27406" target="27450" cy:directed="1"/>
      <edge id="30710" label="0111110100 (1) 0011110100" source="27406" target="27412" cy:directed="1"/>
      <edge id="30709" label="0110010100 (1) 0110010110" source="27405" target="27404" cy:directed="1"/>
      <edge id="30708" label="0110010100 (1) 0110010000" source="27405" target="27612" cy:directed="1"/>
      <edge id="30707" label="0110010100 (1) 0110011100" source="27405" target="27459" cy:directed="1"/>
      <edge id="30706" label="0110010100 (1) 0110000100" source="27405" target="27506" cy:directed="1"/>
      <edge id="30705" label="0110010100 (1) 0110110100" source="27405" target="27450" cy:directed="1"/>
      <edge id="30704" label="0110010100 (1) 0100010100" source="27405" target="27423" cy:directed="1"/>
      <edge id="30703" label="0110010100 (1) 0010010100" source="27405" target="27434" cy:directed="1"/>
      <edge id="30702" label="0110010110 (1) 0110010010" source="27404" target="27611" cy:directed="1"/>
      <edge id="30701" label="0110010110 (1) 0110000110" source="27404" target="27505" cy:directed="1"/>
      <edge id="30700" label="0110010110 (1) 0110110110" source="27404" target="26981" cy:directed="1"/>
      <edge id="30699" label="0110010110 (1) 0100010110" source="27404" target="27422" cy:directed="1"/>
      <edge id="30698" label="0110010110 (1) 0010010110" source="27404" target="27409" cy:directed="1"/>
      <edge id="30697" label="1110010100 (1) 1110010110" source="27403" target="27402" cy:directed="1"/>
      <edge id="30696" label="1110010100 (1) 1110010000" source="27403" target="27616" cy:directed="1"/>
      <edge id="30695" label="1110010100 (1) 1110011100" source="27403" target="27462" cy:directed="1"/>
      <edge id="30694" label="1110010100 (1) 1110000100" source="27403" target="27514" cy:directed="1"/>
      <edge id="30693" label="1110010100 (1) 1110110100" source="27403" target="27455" cy:directed="1"/>
      <edge id="30692" label="1110010100 (1) 1100010100" source="27403" target="27420" cy:directed="1"/>
      <edge id="30691" label="1110010100 (1) 1010010100" source="27403" target="27430" cy:directed="1"/>
      <edge id="30690" label="1110010110 (1) 1110010010" source="27402" target="27615" cy:directed="1"/>
      <edge id="30689" label="1110010110 (1) 1110000110" source="27402" target="27509" cy:directed="1"/>
      <edge id="30688" label="1110010110 (1) 1110110110" source="27402" target="26982" cy:directed="1"/>
      <edge id="30687" label="1110010110 (1) 1100010110" source="27402" target="27419" cy:directed="1"/>
      <edge id="30686" label="1110010110 (1) 1010010110" source="27402" target="27408" cy:directed="1"/>
      <edge id="30685" label="1000100010 (1) 1000100000" source="27401" target="27665" cy:directed="1"/>
      <edge id="30684" label="1000100010 (1) 1000110010" source="27401" target="27400" cy:directed="1"/>
      <edge id="30683" label="1000100010 (1) 1000000010" source="27401" target="27697" cy:directed="1"/>
      <edge id="30682" label="1000100010 (1) 1001100010" source="27401" target="27399" cy:directed="1"/>
      <edge id="30681" label="1000100010 (1) 1010100010" source="27401" target="27398" cy:directed="1"/>
      <edge id="30680" label="1000100010 (1) 1100100010" source="27401" target="27397" cy:directed="1"/>
      <edge id="30679" label="1000110010 (1) 1000110000" source="27400" target="27664" cy:directed="1"/>
      <edge id="30678" label="1000110010 (1) 1000010010" source="27400" target="27644" cy:directed="1"/>
      <edge id="30677" label="1000110010 (1) 1001110010" source="27400" target="27319" cy:directed="1"/>
      <edge id="30676" label="1000110010 (1) 1010110010" source="27400" target="27365" cy:directed="1"/>
      <edge id="30675" label="1001100010 (1) 1001100000" source="27399" target="27663" cy:directed="1"/>
      <edge id="30674" label="1001100010 (1) 1001110010" source="27399" target="27319" cy:directed="1"/>
      <edge id="30673" label="1001100010 (1) 1001000010" source="27399" target="27680" cy:directed="1"/>
      <edge id="30672" label="1001100010 (1) 1011100010" source="27399" target="27318" cy:directed="1"/>
      <edge id="30671" label="1001100010 (1) 1101100010" source="27399" target="27445" cy:directed="1"/>
      <edge id="30670" label="1010100010 (1) 1010100000" source="27398" target="27662" cy:directed="1"/>
      <edge id="30669" label="1010100010 (1) 1010110010" source="27398" target="27365" cy:directed="1"/>
      <edge id="30668" label="1010100010 (1) 1010000010" source="27398" target="27688" cy:directed="1"/>
      <edge id="30667" label="1010100010 (1) 1110100010" source="27398" target="27364" cy:directed="1"/>
      <edge id="30666" label="1100100010 (1) 1100100000" source="27397" target="27661" cy:directed="1"/>
      <edge id="30665" label="1100100010 (1) 1100110010" source="27397" target="27391" cy:directed="1"/>
      <edge id="30664" label="1100100010 (1) 1100000010" source="27397" target="27694" cy:directed="1"/>
      <edge id="30663" label="1100100010 (1) 1101100010" source="27397" target="27445" cy:directed="1"/>
      <edge id="30662" label="0000100010 (1) 0000100000" source="27396" target="27660" cy:directed="1"/>
      <edge id="30661" label="0000100010 (1) 0000110010" source="27396" target="27395" cy:directed="1"/>
      <edge id="30660" label="0000100010 (1) 0000000010" source="27396" target="27700" cy:directed="1"/>
      <edge id="30659" label="0000100010 (1) 0001100010" source="27396" target="27394" cy:directed="1"/>
      <edge id="30658" label="0000100010 (1) 0010100010" source="27396" target="27393" cy:directed="1"/>
      <edge id="30657" label="0000110010 (1) 0000110000" source="27395" target="27659" cy:directed="1"/>
      <edge id="30656" label="0000110010 (1) 0000010010" source="27395" target="27638" cy:directed="1"/>
      <edge id="30655" label="0000110010 (1) 0001110010" source="27395" target="27316" cy:directed="1"/>
      <edge id="30654" label="0000110010 (1) 0010110010" source="27395" target="27363" cy:directed="1"/>
      <edge id="30653" label="0001100010 (1) 0001100000" source="27394" target="27658" cy:directed="1"/>
      <edge id="30652" label="0001100010 (1) 0001110010" source="27394" target="27316" cy:directed="1"/>
      <edge id="30651" label="0001100010 (1) 0001000010" source="27394" target="27681" cy:directed="1"/>
      <edge id="30650" label="0001100010 (1) 0011100010" source="27394" target="27315" cy:directed="1"/>
      <edge id="30649" label="0010100010 (1) 0010100000" source="27393" target="27657" cy:directed="1"/>
      <edge id="30648" label="0010100010 (1) 0010110010" source="27393" target="27363" cy:directed="1"/>
      <edge id="30647" label="0010100010 (1) 0010000010" source="27393" target="27685" cy:directed="1"/>
      <edge id="30646" label="1010111100 (1) 1010011100" source="27392" target="27467" cy:directed="1"/>
      <edge id="30645" label="1100110010 (1) 1100110000" source="27391" target="27656" cy:directed="1"/>
      <edge id="30644" label="1100110010 (1) 1100010010" source="27391" target="27633" cy:directed="1"/>
      <edge id="30643" label="1100110010 (1) 1101110010" source="27391" target="27310" cy:directed="1"/>
      <edge id="30642" label="1100110010 (1) 1000110010" source="27391" target="27400" cy:directed="1"/>
      <edge id="30641" label="0010111100 (1) 0010011100" source="27390" target="27465" cy:directed="1"/>
      <edge id="30640" label="0100100010 (1) 0100100000" source="27389" target="27655" cy:directed="1"/>
      <edge id="30639" label="0100100010 (1) 0100110010" source="27389" target="27388" cy:directed="1"/>
      <edge id="30638" label="0100100010 (1) 0100000010" source="27389" target="27691" cy:directed="1"/>
      <edge id="30637" label="0100100010 (1) 0101100010" source="27389" target="27441" cy:directed="1"/>
      <edge id="30636" label="0100100010 (1) 0000100010" source="27389" target="27396" cy:directed="1"/>
      <edge id="30635" label="0100110010 (1) 0100110000" source="27388" target="27654" cy:directed="1"/>
      <edge id="30634" label="0100110010 (1) 0100010010" source="27388" target="27628" cy:directed="1"/>
      <edge id="30633" label="0100110010 (1) 0101110010" source="27388" target="27304" cy:directed="1"/>
      <edge id="30632" label="0100110010 (1) 0000110010" source="27388" target="27395" cy:directed="1"/>
      <edge id="30631" label="0000000001 (1) 0000000011" source="27387" target="27386" cy:directed="1"/>
      <edge id="30630" label="0000000001 (1) 0000000101" source="27387" target="27385" cy:directed="1"/>
      <edge id="30629" label="0000000001 (1) 0001000001" source="27387" target="27384" cy:directed="1"/>
      <edge id="30628" label="0000000011 (1) 0000000111" source="27386" target="27015" cy:directed="1"/>
      <edge id="30627" label="0000000011 (1) 0001000011" source="27386" target="27312" cy:directed="1"/>
      <edge id="30626" label="0000000101 (1) 0000000111" source="27385" target="27015" cy:directed="1"/>
      <edge id="30625" label="0000000101 (1) 0000100101" source="27385" target="27268" cy:directed="1"/>
      <edge id="30624" label="0000000101 (1) 0001000101" source="27385" target="27311" cy:directed="1"/>
      <edge id="30623" label="0000000101 (1) 0010000101" source="27385" target="27342" cy:directed="1"/>
      <edge id="30622" label="0001000001 (1) 0001000011" source="27384" target="27312" cy:directed="1"/>
      <edge id="30621" label="0001000001 (1) 0001000101" source="27384" target="27311" cy:directed="1"/>
      <edge id="30620" label="1000000001 (1) 1000000011" source="27383" target="27382" cy:directed="1"/>
      <edge id="30619" label="1000000001 (1) 1000000101" source="27383" target="27381" cy:directed="1"/>
      <edge id="30618" label="1000000001 (1) 1001000001" source="27383" target="27380" cy:directed="1"/>
      <edge id="30617" label="1000000001 (1) 1100000001" source="27383" target="27379" cy:directed="1"/>
      <edge id="30616" label="1000000011 (1) 1000000111" source="27382" target="27021" cy:directed="1"/>
      <edge id="30615" label="1000000011 (1) 1001000011" source="27382" target="27308" cy:directed="1"/>
      <edge id="30614" label="1000000011 (1) 1100000011" source="27382" target="27376" cy:directed="1"/>
      <edge id="30613" label="1000000101 (1) 1000000111" source="27381" target="27021" cy:directed="1"/>
      <edge id="30612" label="1000000101 (1) 1000100101" source="27381" target="27263" cy:directed="1"/>
      <edge id="30611" label="1000000101 (1) 1001000101" source="27381" target="27307" cy:directed="1"/>
      <edge id="30610" label="1000000101 (1) 1010000101" source="27381" target="27346" cy:directed="1"/>
      <edge id="30609" label="1000000101 (1) 1100000101" source="27381" target="27375" cy:directed="1"/>
      <edge id="30608" label="1001000001 (1) 1001000011" source="27380" target="27308" cy:directed="1"/>
      <edge id="30607" label="1001000001 (1) 1001000101" source="27380" target="27307" cy:directed="1"/>
      <edge id="30606" label="1001000001 (1) 1101000001" source="27380" target="27374" cy:directed="1"/>
      <edge id="30605" label="1100000001 (1) 1100000011" source="27379" target="27376" cy:directed="1"/>
      <edge id="30604" label="1100000001 (1) 1100000101" source="27379" target="27375" cy:directed="1"/>
      <edge id="30603" label="1100000001 (1) 1101000001" source="27379" target="27374" cy:directed="1"/>
      <edge id="30602" label="1110111100 (1) 1110011100" source="27378" target="27462" cy:directed="1"/>
      <edge id="30601" label="1110111100 (1) 1010111100" source="27378" target="27392" cy:directed="1"/>
      <edge id="30600" label="0110111100 (1) 0110011100" source="27377" target="27459" cy:directed="1"/>
      <edge id="30599" label="0110111100 (1) 0010111100" source="27377" target="27390" cy:directed="1"/>
      <edge id="30598" label="1100000011 (1) 1100000111" source="27376" target="27010" cy:directed="1"/>
      <edge id="30597" label="1100000011 (1) 1101000011" source="27376" target="27301" cy:directed="1"/>
      <edge id="30596" label="1100000101 (1) 1100000111" source="27375" target="27010" cy:directed="1"/>
      <edge id="30595" label="1100000101 (1) 1100100101" source="27375" target="27255" cy:directed="1"/>
      <edge id="30594" label="1100000101 (1) 1101000101" source="27375" target="27300" cy:directed="1"/>
      <edge id="30593" label="1101000001 (1) 1101000011" source="27374" target="27301" cy:directed="1"/>
      <edge id="30592" label="1101000001 (1) 1101000101" source="27374" target="27300" cy:directed="1"/>
      <edge id="30591" label="1101000001 (1) 1101100001" source="27374" target="27299" cy:directed="1"/>
      <edge id="30590" label="0100000001 (1) 0100000011" source="27373" target="27372" cy:directed="1"/>
      <edge id="30589" label="0100000001 (1) 0100000101" source="27373" target="27371" cy:directed="1"/>
      <edge id="30588" label="0100000001 (1) 0101000001" source="27373" target="27370" cy:directed="1"/>
      <edge id="30587" label="0100000001 (1) 0000000001" source="27373" target="27387" cy:directed="1"/>
      <edge id="30586" label="0100000011 (1) 0100000111" source="27372" target="27004" cy:directed="1"/>
      <edge id="30585" label="0100000011 (1) 0101000011" source="27372" target="27298" cy:directed="1"/>
      <edge id="30584" label="0100000011 (1) 0000000011" source="27372" target="27386" cy:directed="1"/>
      <edge id="30583" label="0100000101 (1) 0100000111" source="27371" target="27004" cy:directed="1"/>
      <edge id="30582" label="0100000101 (1) 0100100101" source="27371" target="27252" cy:directed="1"/>
      <edge id="30581" label="0100000101 (1) 0101000101" source="27371" target="27297" cy:directed="1"/>
      <edge id="30580" label="0100000101 (1) 0000000101" source="27371" target="27385" cy:directed="1"/>
      <edge id="30579" label="0101000001 (1) 0101000011" source="27370" target="27298" cy:directed="1"/>
      <edge id="30578" label="0101000001 (1) 0101000101" source="27370" target="27297" cy:directed="1"/>
      <edge id="30577" label="0101000001 (1) 0101100001" source="27370" target="27296" cy:directed="1"/>
      <edge id="30576" label="0101000001 (1) 0001000001" source="27370" target="27384" cy:directed="1"/>
      <edge id="30575" label="0001010110 (1) 0001010010" source="27369" target="27607" cy:directed="1"/>
      <edge id="30574" label="0001010110 (1) 0001000110" source="27369" target="27496" cy:directed="1"/>
      <edge id="30573" label="0001010110 (1) 0001110110" source="27369" target="26961" cy:directed="1"/>
      <edge id="30572" label="0001010110 (1) 0011010110" source="27369" target="27327" cy:directed="1"/>
      <edge id="30571" label="0011010100 (1) 0011010110" source="27368" target="27327" cy:directed="1"/>
      <edge id="30570" label="0011010100 (1) 0011010000" source="27368" target="27586" cy:directed="1"/>
      <edge id="30569" label="0011010100 (1) 0011011100" source="27368" target="27438" cy:directed="1"/>
      <edge id="30568" label="0011010100 (1) 0011000100" source="27368" target="27494" cy:directed="1"/>
      <edge id="30567" label="0011010100 (1) 0011110100" source="27368" target="27412" cy:directed="1"/>
      <edge id="30566" label="0011010100 (1) 0010010100" source="27368" target="27434" cy:directed="1"/>
      <edge id="30565" label="1001010110 (1) 1001010010" source="27367" target="27609" cy:directed="1"/>
      <edge id="30564" label="1001010110 (1) 1001000110" source="27367" target="27499" cy:directed="1"/>
      <edge id="30563" label="1001010110 (1) 1001110110" source="27367" target="26962" cy:directed="1"/>
      <edge id="30562" label="1001010110 (1) 1011010110" source="27367" target="27326" cy:directed="1"/>
      <edge id="30561" label="1011010100 (1) 1011010110" source="27366" target="27326" cy:directed="1"/>
      <edge id="30560" label="1011010100 (1) 1011010000" source="27366" target="27589" cy:directed="1"/>
      <edge id="30559" label="1011010100 (1) 1011011100" source="27366" target="27442" cy:directed="1"/>
      <edge id="30558" label="1011010100 (1) 1011000100" source="27366" target="27497" cy:directed="1"/>
      <edge id="30557" label="1011010100 (1) 1011110100" source="27366" target="27413" cy:directed="1"/>
      <edge id="30556" label="1011010100 (1) 1010010100" source="27366" target="27430" cy:directed="1"/>
      <edge id="30555" label="1010110010 (1) 1010110000" source="27365" target="27653" cy:directed="1"/>
      <edge id="30554" label="1010110010 (1) 1010010010" source="27365" target="27623" cy:directed="1"/>
      <edge id="30553" label="1110100010 (1) 1110100000" source="27364" target="27652" cy:directed="1"/>
      <edge id="30552" label="1110100010 (1) 1110110010" source="27364" target="27360" cy:directed="1"/>
      <edge id="30551" label="1110100010 (1) 1110000010" source="27364" target="27684" cy:directed="1"/>
      <edge id="30550" label="1110100010 (1) 1100100010" source="27364" target="27397" cy:directed="1"/>
      <edge id="30549" label="0010110010 (1) 0010110000" source="27363" target="27651" cy:directed="1"/>
      <edge id="30548" label="0010110010 (1) 0010010010" source="27363" target="27619" cy:directed="1"/>
      <edge id="30547" label="0101010110 (1) 0101010010" source="27362" target="27603" cy:directed="1"/>
      <edge id="30546" label="0101010110 (1) 0101000110" source="27362" target="27491" cy:directed="1"/>
      <edge id="30545" label="0101010110 (1) 0101110110" source="27362" target="26954" cy:directed="1"/>
      <edge id="30544" label="0101010110 (1) 0001010110" source="27362" target="27369" cy:directed="1"/>
      <edge id="30543" label="1101010110 (1) 1101010010" source="27361" target="27605" cy:directed="1"/>
      <edge id="30542" label="1101010110 (1) 1101000110" source="27361" target="27493" cy:directed="1"/>
      <edge id="30541" label="1101010110 (1) 1101110110" source="27361" target="26956" cy:directed="1"/>
      <edge id="30540" label="1101010110 (1) 1001010110" source="27361" target="27367" cy:directed="1"/>
      <edge id="30539" label="1110110010 (1) 1110110000" source="27360" target="27650" cy:directed="1"/>
      <edge id="30538" label="1110110010 (1) 1110010010" source="27360" target="27615" cy:directed="1"/>
      <edge id="30537" label="1110110010 (1) 1100110010" source="27360" target="27391" cy:directed="1"/>
      <edge id="30536" label="1110110010 (1) 1010110010" source="27360" target="27365" cy:directed="1"/>
      <edge id="30535" label="1000001100 (1) 1000001110" source="27359" target="27358" cy:directed="1"/>
      <edge id="30534" label="1000001100 (1) 1000001000" source="27359" target="27601" cy:directed="1"/>
      <edge id="30533" label="1000001100 (1) 1000000100" source="27359" target="27555" cy:directed="1"/>
      <edge id="30532" label="1000001100 (1) 1001001100" source="27359" target="27357" cy:directed="1"/>
      <edge id="30531" label="1000001100 (1) 1010001100" source="27359" target="27356" cy:directed="1"/>
      <edge id="30530" label="1000001100 (1) 1100001100" source="27359" target="27355" cy:directed="1"/>
      <edge id="30529" label="1000001110 (1) 1000001010" source="27358" target="27600" cy:directed="1"/>
      <edge id="30528" label="1000001110 (1) 1000000110" source="27358" target="27554" cy:directed="1"/>
      <edge id="30527" label="1000001110 (1) 1001001110" source="27358" target="27291" cy:directed="1"/>
      <edge id="30526" label="1000001110 (1) 1010001110" source="27358" target="27321" cy:directed="1"/>
      <edge id="30525" label="1000001110 (1) 1100001110" source="27358" target="27340" cy:directed="1"/>
      <edge id="30524" label="1001001100 (1) 1001001110" source="27357" target="27291" cy:directed="1"/>
      <edge id="30523" label="1001001100 (1) 1001001000" source="27357" target="27599" cy:directed="1"/>
      <edge id="30522" label="1001001100 (1) 1001000100" source="27357" target="27552" cy:directed="1"/>
      <edge id="30521" label="1001001100 (1) 1011001100" source="27357" target="27290" cy:directed="1"/>
      <edge id="30520" label="1001001100 (1) 1101001100" source="27357" target="27339" cy:directed="1"/>
      <edge id="30519" label="1010001100 (1) 1010001110" source="27356" target="27321" cy:directed="1"/>
      <edge id="30518" label="1010001100 (1) 1010001000" source="27356" target="27577" cy:directed="1"/>
      <edge id="30517" label="1010001100 (1) 1010000100" source="27356" target="27551" cy:directed="1"/>
      <edge id="30516" label="1010001100 (1) 1110001100" source="27356" target="27320" cy:directed="1"/>
      <edge id="30515" label="1100001100 (1) 1100001110" source="27355" target="27340" cy:directed="1"/>
      <edge id="30514" label="1100001100 (1) 1100001000" source="27355" target="27598" cy:directed="1"/>
      <edge id="30513" label="1100001100 (1) 1100000100" source="27355" target="27550" cy:directed="1"/>
      <edge id="30512" label="1100001100 (1) 1101001100" source="27355" target="27339" cy:directed="1"/>
      <edge id="30511" label="0000001100 (1) 0000001110" source="27354" target="27353" cy:directed="1"/>
      <edge id="30510" label="0000001100 (1) 0000001000" source="27354" target="27597" cy:directed="1"/>
      <edge id="30509" label="0000001100 (1) 0000000100" source="27354" target="27546" cy:directed="1"/>
      <edge id="30508" label="0000001100 (1) 0001001100" source="27354" target="27352" cy:directed="1"/>
      <edge id="30507" label="0000001100 (1) 0010001100" source="27354" target="27351" cy:directed="1"/>
      <edge id="30506" label="0000001110 (1) 0000001010" source="27353" target="27596" cy:directed="1"/>
      <edge id="30505" label="0000001110 (1) 0000000110" source="27353" target="27545" cy:directed="1"/>
      <edge id="30504" label="0000001110 (1) 0001001110" source="27353" target="27289" cy:directed="1"/>
      <edge id="30503" label="0000001110 (1) 0010001110" source="27353" target="27317" cy:directed="1"/>
      <edge id="30502" label="0001001100 (1) 0001001110" source="27352" target="27289" cy:directed="1"/>
      <edge id="30501" label="0001001100 (1) 0001001000" source="27352" target="27595" cy:directed="1"/>
      <edge id="30500" label="0001001100 (1) 0001000100" source="27352" target="27543" cy:directed="1"/>
      <edge id="30499" label="0001001100 (1) 0011001100" source="27352" target="27288" cy:directed="1"/>
      <edge id="30498" label="0010001100 (1) 0010001110" source="27351" target="27317" cy:directed="1"/>
      <edge id="30497" label="0010001100 (1) 0010001000" source="27351" target="27574" cy:directed="1"/>
      <edge id="30496" label="0010001100 (1) 0010000100" source="27351" target="27542" cy:directed="1"/>
      <edge id="30495" label="0110100010 (1) 0110100000" source="27350" target="27649" cy:directed="1"/>
      <edge id="30494" label="0110100010 (1) 0110110010" source="27350" target="27349" cy:directed="1"/>
      <edge id="30493" label="0110100010 (1) 0110000010" source="27350" target="27682" cy:directed="1"/>
      <edge id="30492" label="0110100010 (1) 0100100010" source="27350" target="27389" cy:directed="1"/>
      <edge id="30491" label="0110100010 (1) 0010100010" source="27350" target="27393" cy:directed="1"/>
      <edge id="30490" label="0110110010 (1) 0110110000" source="27349" target="27648" cy:directed="1"/>
      <edge id="30489" label="0110110010 (1) 0110010010" source="27349" target="27611" cy:directed="1"/>
      <edge id="30488" label="0110110010 (1) 0100110010" source="27349" target="27388" cy:directed="1"/>
      <edge id="30487" label="0110110010 (1) 0010110010" source="27349" target="27363" cy:directed="1"/>
      <edge id="30486" label="1010000001 (1) 1010000011" source="27348" target="27347" cy:directed="1"/>
      <edge id="30485" label="1010000001 (1) 1010000101" source="27348" target="27346" cy:directed="1"/>
      <edge id="30484" label="1010000001 (1) 1000000001" source="27348" target="27383" cy:directed="1"/>
      <edge id="30483" label="1010000001 (1) 1110000001" source="27348" target="27345" cy:directed="1"/>
      <edge id="30482" label="1010000011 (1) 1010000111" source="27347" target="26979" cy:directed="1"/>
      <edge id="30481" label="1010000011 (1) 1000000011" source="27347" target="27382" cy:directed="1"/>
      <edge id="30480" label="1010000011 (1) 1110000011" source="27347" target="27334" cy:directed="1"/>
      <edge id="30479" label="1010000101 (1) 1010000111" source="27346" target="26979" cy:directed="1"/>
      <edge id="30478" label="1010000101 (1) 1010100101" source="27346" target="27236" cy:directed="1"/>
      <edge id="30477" label="1010000101 (1) 1110000101" source="27346" target="27333" cy:directed="1"/>
      <edge id="30476" label="1110000001 (1) 1110000011" source="27345" target="27334" cy:directed="1"/>
      <edge id="30475" label="1110000001 (1) 1110000101" source="27345" target="27333" cy:directed="1"/>
      <edge id="30474" label="1110000001 (1) 1100000001" source="27345" target="27379" cy:directed="1"/>
      <edge id="30473" label="0010000001 (1) 0010000011" source="27344" target="27343" cy:directed="1"/>
      <edge id="30472" label="0010000001 (1) 0010000101" source="27344" target="27342" cy:directed="1"/>
      <edge id="30471" label="0010000001 (1) 0000000001" source="27344" target="27387" cy:directed="1"/>
      <edge id="30470" label="0010000011 (1) 0010000111" source="27343" target="26980" cy:directed="1"/>
      <edge id="30469" label="0010000011 (1) 0000000011" source="27343" target="27386" cy:directed="1"/>
      <edge id="30468" label="0010000101 (1) 0010000111" source="27342" target="26980" cy:directed="1"/>
      <edge id="30467" label="0010000101 (1) 0010100101" source="27342" target="27238" cy:directed="1"/>
      <edge id="30466" label="1001111100 (1) 1001011100" source="27341" target="27453" cy:directed="1"/>
      <edge id="30465" label="1001111100 (1) 1011111100" source="27341" target="27306" cy:directed="1"/>
      <edge id="30464" label="1100001110 (1) 1100001010" source="27340" target="27594" cy:directed="1"/>
      <edge id="30463" label="1100001110 (1) 1100000110" source="27340" target="27538" cy:directed="1"/>
      <edge id="30462" label="1100001110 (1) 1101001110" source="27340" target="27280" cy:directed="1"/>
      <edge id="30461" label="1101001100 (1) 1101001110" source="27339" target="27280" cy:directed="1"/>
      <edge id="30460" label="1101001100 (1) 1101001000" source="27339" target="27593" cy:directed="1"/>
      <edge id="30459" label="1101001100 (1) 1101000100" source="27339" target="27536" cy:directed="1"/>
      <edge id="30458" label="1101001100 (1) 1101101100" source="27339" target="27279" cy:directed="1"/>
      <edge id="30457" label="0001111100 (1) 0001011100" source="27338" target="27451" cy:directed="1"/>
      <edge id="30456" label="0001111100 (1) 0011111100" source="27338" target="27309" cy:directed="1"/>
      <edge id="30455" label="0100001100 (1) 0100001110" source="27337" target="27336" cy:directed="1"/>
      <edge id="30454" label="0100001100 (1) 0100001000" source="27337" target="27592" cy:directed="1"/>
      <edge id="30453" label="0100001100 (1) 0100000100" source="27337" target="27532" cy:directed="1"/>
      <edge id="30452" label="0100001100 (1) 0101001100" source="27337" target="27335" cy:directed="1"/>
      <edge id="30451" label="0100001100 (1) 0000001100" source="27337" target="27354" cy:directed="1"/>
      <edge id="30450" label="0100001110 (1) 0100001010" source="27336" target="27591" cy:directed="1"/>
      <edge id="30449" label="0100001110 (1) 0100000110" source="27336" target="27531" cy:directed="1"/>
      <edge id="30448" label="0100001110 (1) 0101001110" source="27336" target="27278" cy:directed="1"/>
      <edge id="30447" label="0100001110 (1) 0000001110" source="27336" target="27353" cy:directed="1"/>
      <edge id="30446" label="0101001100 (1) 0101001110" source="27335" target="27278" cy:directed="1"/>
      <edge id="30445" label="0101001100 (1) 0101001000" source="27335" target="27590" cy:directed="1"/>
      <edge id="30444" label="0101001100 (1) 0101000100" source="27335" target="27529" cy:directed="1"/>
      <edge id="30443" label="0101001100 (1) 0101101100" source="27335" target="27277" cy:directed="1"/>
      <edge id="30442" label="0101001100 (1) 0001001100" source="27335" target="27352" cy:directed="1"/>
      <edge id="30441" label="1110000011 (1) 1110000111" source="27334" target="26975" cy:directed="1"/>
      <edge id="30440" label="1110000011 (1) 1100000011" source="27334" target="27376" cy:directed="1"/>
      <edge id="30439" label="1110000101 (1) 1110000111" source="27333" target="26975" cy:directed="1"/>
      <edge id="30438" label="1110000101 (1) 1110100101" source="27333" target="27230" cy:directed="1"/>
      <edge id="30437" label="1110000101 (1) 1100000101" source="27333" target="27375" cy:directed="1"/>
      <edge id="30436" label="0110000001 (1) 0110000011" source="27332" target="27331" cy:directed="1"/>
      <edge id="30435" label="0110000001 (1) 0110000101" source="27332" target="27330" cy:directed="1"/>
      <edge id="30434" label="0110000001 (1) 0100000001" source="27332" target="27373" cy:directed="1"/>
      <edge id="30433" label="0110000001 (1) 0010000001" source="27332" target="27344" cy:directed="1"/>
      <edge id="30432" label="0110000011 (1) 0110000111" source="27331" target="26972" cy:directed="1"/>
      <edge id="30431" label="0110000011 (1) 0100000011" source="27331" target="27372" cy:directed="1"/>
      <edge id="30430" label="0110000011 (1) 0010000011" source="27331" target="27343" cy:directed="1"/>
      <edge id="30429" label="0110000101 (1) 0110000111" source="27330" target="26972" cy:directed="1"/>
      <edge id="30428" label="0110000101 (1) 0110100101" source="27330" target="27227" cy:directed="1"/>
      <edge id="30427" label="0110000101 (1) 0100000101" source="27330" target="27371" cy:directed="1"/>
      <edge id="30426" label="0110000101 (1) 0010000101" source="27330" target="27342" cy:directed="1"/>
      <edge id="30425" label="1101111100 (1) 1111111100" source="27329" target="27303" cy:directed="1"/>
      <edge id="30424" label="1101111100 (1) 1001111100" source="27329" target="27341" cy:directed="1"/>
      <edge id="30423" label="0101111100 (1) 0111111100" source="27328" target="27302" cy:directed="1"/>
      <edge id="30422" label="0101111100 (1) 0001111100" source="27328" target="27338" cy:directed="1"/>
      <edge id="30421" label="0011010110 (1) 0011010010" source="27327" target="27585" cy:directed="1"/>
      <edge id="30420" label="0011010110 (1) 0011000110" source="27327" target="27478" cy:directed="1"/>
      <edge id="30419" label="0011010110 (1) 0011110110" source="27327" target="26947" cy:directed="1"/>
      <edge id="30418" label="0011010110 (1) 0010010110" source="27327" target="27409" cy:directed="1"/>
      <edge id="30417" label="1011010110 (1) 1011010010" source="27326" target="27588" cy:directed="1"/>
      <edge id="30416" label="1011010110 (1) 1011000110" source="27326" target="27481" cy:directed="1"/>
      <edge id="30415" label="1011010110 (1) 1011110110" source="27326" target="26949" cy:directed="1"/>
      <edge id="30414" label="1011010110 (1) 1010010110" source="27326" target="27408" cy:directed="1"/>
      <edge id="30413" label="0111010100 (1) 0111010110" source="27325" target="27324" cy:directed="1"/>
      <edge id="30412" label="0111010100 (1) 0111010000" source="27325" target="27583" cy:directed="1"/>
      <edge id="30411" label="0111010100 (1) 0111011100" source="27325" target="27426" cy:directed="1"/>
      <edge id="30410" label="0111010100 (1) 0111000100" source="27325" target="27472" cy:directed="1"/>
      <edge id="30409" label="0111010100 (1) 0111110100" source="27325" target="27406" cy:directed="1"/>
      <edge id="30408" label="0111010100 (1) 0110010100" source="27325" target="27405" cy:directed="1"/>
      <edge id="30407" label="0111010100 (1) 0101010100" source="27325" target="27421" cy:directed="1"/>
      <edge id="30406" label="0111010100 (1) 0011010100" source="27325" target="27368" cy:directed="1"/>
      <edge id="30405" label="0111010110 (1) 0111010010" source="27324" target="27582" cy:directed="1"/>
      <edge id="30404" label="0111010110 (1) 0111000110" source="27324" target="27471" cy:directed="1"/>
      <edge id="30403" label="0111010110 (1) 0111110110" source="27324" target="26935" cy:directed="1"/>
      <edge id="30402" label="0111010110 (1) 0110010110" source="27324" target="27404" cy:directed="1"/>
      <edge id="30401" label="0111010110 (1) 0101010110" source="27324" target="27362" cy:directed="1"/>
      <edge id="30400" label="0111010110 (1) 0011010110" source="27324" target="27327" cy:directed="1"/>
      <edge id="30399" label="1111010100 (1) 1111010110" source="27323" target="27322" cy:directed="1"/>
      <edge id="30398" label="1111010100 (1) 1111010000" source="27323" target="27580" cy:directed="1"/>
      <edge id="30397" label="1111010100 (1) 1111011100" source="27323" target="27424" cy:directed="1"/>
      <edge id="30396" label="1111010100 (1) 1111000100" source="27323" target="27479" cy:directed="1"/>
      <edge id="30395" label="1111010100 (1) 1111110100" source="27323" target="27407" cy:directed="1"/>
      <edge id="30394" label="1111010100 (1) 1110010100" source="27323" target="27403" cy:directed="1"/>
      <edge id="30393" label="1111010100 (1) 1101010100" source="27323" target="27418" cy:directed="1"/>
      <edge id="30392" label="1111010100 (1) 1011010100" source="27323" target="27366" cy:directed="1"/>
      <edge id="30391" label="1111010110 (1) 1111010010" source="27322" target="27579" cy:directed="1"/>
      <edge id="30390" label="1111010110 (1) 1111000110" source="27322" target="27474" cy:directed="1"/>
      <edge id="30389" label="1111010110 (1) 1111110110" source="27322" target="26934" cy:directed="1"/>
      <edge id="30388" label="1111010110 (1) 1110010110" source="27322" target="27402" cy:directed="1"/>
      <edge id="30387" label="1111010110 (1) 1101010110" source="27322" target="27361" cy:directed="1"/>
      <edge id="30386" label="1111010110 (1) 1011010110" source="27322" target="27326" cy:directed="1"/>
      <edge id="30385" label="1010001110 (1) 1010001010" source="27321" target="27576" cy:directed="1"/>
      <edge id="30384" label="1010001110 (1) 1010000110" source="27321" target="27516" cy:directed="1"/>
      <edge id="30383" label="1010001110 (1) 1110001110" source="27321" target="27305" cy:directed="1"/>
      <edge id="30382" label="1110001100 (1) 1110001110" source="27320" target="27305" cy:directed="1"/>
      <edge id="30381" label="1110001100 (1) 1110001000" source="27320" target="27575" cy:directed="1"/>
      <edge id="30380" label="1110001100 (1) 1110000100" source="27320" target="27514" cy:directed="1"/>
      <edge id="30379" label="1110001100 (1) 1100001100" source="27320" target="27355" cy:directed="1"/>
      <edge id="30378" label="1001110010 (1) 1001110000" source="27319" target="27647" cy:directed="1"/>
      <edge id="30377" label="1001110010 (1) 1001010010" source="27319" target="27609" cy:directed="1"/>
      <edge id="30376" label="1001110010 (1) 1011110010" source="27319" target="27295" cy:directed="1"/>
      <edge id="30375" label="1011100010 (1) 1011100000" source="27318" target="27646" cy:directed="1"/>
      <edge id="30374" label="1011100010 (1) 1011110010" source="27318" target="27295" cy:directed="1"/>
      <edge id="30373" label="1011100010 (1) 1011000010" source="27318" target="27674" cy:directed="1"/>
      <edge id="30372" label="1011100010 (1) 1010100010" source="27318" target="27398" cy:directed="1"/>
      <edge id="30371" label="1011100010 (1) 1111100010" source="27318" target="27415" cy:directed="1"/>
      <edge id="30370" label="0010001110 (1) 0010001010" source="27317" target="27573" cy:directed="1"/>
      <edge id="30369" label="0010001110 (1) 0010000110" source="27317" target="27513" cy:directed="1"/>
      <edge id="30368" label="0001110010 (1) 0001110000" source="27316" target="27641" cy:directed="1"/>
      <edge id="30367" label="0001110010 (1) 0001010010" source="27316" target="27607" cy:directed="1"/>
      <edge id="30366" label="0001110010 (1) 0011110010" source="27316" target="27294" cy:directed="1"/>
      <edge id="30365" label="0011100010 (1) 0011100000" source="27315" target="27640" cy:directed="1"/>
      <edge id="30364" label="0011100010 (1) 0011110010" source="27315" target="27294" cy:directed="1"/>
      <edge id="30363" label="0011100010 (1) 0011000010" source="27315" target="27671" cy:directed="1"/>
      <edge id="30362" label="0011100010 (1) 0010100010" source="27315" target="27393" cy:directed="1"/>
      <edge id="30361" label="0110001100 (1) 0110001110" source="27314" target="27313" cy:directed="1"/>
      <edge id="30360" label="0110001100 (1) 0110001000" source="27314" target="27569" cy:directed="1"/>
      <edge id="30359" label="0110001100 (1) 0110000100" source="27314" target="27506" cy:directed="1"/>
      <edge id="30358" label="0110001100 (1) 0100001100" source="27314" target="27337" cy:directed="1"/>
      <edge id="30357" label="0110001100 (1) 0010001100" source="27314" target="27351" cy:directed="1"/>
      <edge id="30356" label="0110001110 (1) 0110001010" source="27313" target="27568" cy:directed="1"/>
      <edge id="30355" label="0110001110 (1) 0110000110" source="27313" target="27505" cy:directed="1"/>
      <edge id="30354" label="0110001110 (1) 0100001110" source="27313" target="27336" cy:directed="1"/>
      <edge id="30353" label="0110001110 (1) 0010001110" source="27313" target="27317" cy:directed="1"/>
      <edge id="30352" label="0001000011 (1) 0001000111" source="27312" target="26957" cy:directed="1"/>
      <edge id="30351" label="0001000101 (1) 0001000111" source="27311" target="26957" cy:directed="1"/>
      <edge id="30350" label="0001000101 (1) 0001100101" source="27311" target="27215" cy:directed="1"/>
      <edge id="30349" label="0001000101 (1) 0011000101" source="27311" target="27285" cy:directed="1"/>
      <edge id="30348" label="1101110010 (1) 1101110000" source="27310" target="27635" cy:directed="1"/>
      <edge id="30347" label="1101110010 (1) 1001110010" source="27310" target="27319" cy:directed="1"/>
      <edge id="30346" label="0011111100 (1) 0011011100" source="27309" target="27438" cy:directed="1"/>
      <edge id="30345" label="0011111100 (1) 0010111100" source="27309" target="27390" cy:directed="1"/>
      <edge id="30344" label="1001000011 (1) 1001000111" source="27308" target="26955" cy:directed="1"/>
      <edge id="30343" label="1001000011 (1) 1101000011" source="27308" target="27301" cy:directed="1"/>
      <edge id="30342" label="1001000101 (1) 1001000111" source="27307" target="26955" cy:directed="1"/>
      <edge id="30341" label="1001000101 (1) 1001100101" source="27307" target="27212" cy:directed="1"/>
      <edge id="30340" label="1001000101 (1) 1011000101" source="27307" target="27282" cy:directed="1"/>
      <edge id="30339" label="1001000101 (1) 1101000101" source="27307" target="27300" cy:directed="1"/>
      <edge id="30338" label="1011111100 (1) 1011011100" source="27306" target="27442" cy:directed="1"/>
      <edge id="30337" label="1011111100 (1) 1010111100" source="27306" target="27392" cy:directed="1"/>
      <edge id="30336" label="1110001110 (1) 1110001010" source="27305" target="27571" cy:directed="1"/>
      <edge id="30335" label="1110001110 (1) 1110000110" source="27305" target="27509" cy:directed="1"/>
      <edge id="30334" label="1110001110 (1) 1100001110" source="27305" target="27340" cy:directed="1"/>
      <edge id="30333" label="0101110010 (1) 0101110000" source="27304" target="27630" cy:directed="1"/>
      <edge id="30332" label="0101110010 (1) 0001110010" source="27304" target="27316" cy:directed="1"/>
      <edge id="30331" label="1111111100 (1) 1110111100" source="27303" target="27378" cy:directed="1"/>
      <edge id="30330" label="1111111100 (1) 1011111100" source="27303" target="27306" cy:directed="1"/>
      <edge id="30329" label="0111111100 (1) 0110111100" source="27302" target="27377" cy:directed="1"/>
      <edge id="30328" label="0111111100 (1) 0011111100" source="27302" target="27309" cy:directed="1"/>
      <edge id="30327" label="1101000011 (1) 1101000111" source="27301" target="26953" cy:directed="1"/>
      <edge id="30326" label="1101000011 (1) 1101100011" source="27301" target="26886" cy:directed="1"/>
      <edge id="30325" label="1101000101 (1) 1101000111" source="27300" target="26953" cy:directed="1"/>
      <edge id="30324" label="1101000101 (1) 1101100101" source="27300" target="27209" cy:directed="1"/>
      <edge id="30323" label="1101100001 (1) 1101100101" source="27299" target="27209" cy:directed="1"/>
      <edge id="30322" label="1101100001 (1) 1101110001" source="27299" target="27208" cy:directed="1"/>
      <edge id="30321" label="0101000011 (1) 0101000111" source="27298" target="26952" cy:directed="1"/>
      <edge id="30320" label="0101000011 (1) 0101100011" source="27298" target="26889" cy:directed="1"/>
      <edge id="30319" label="0101000011 (1) 0001000011" source="27298" target="27312" cy:directed="1"/>
      <edge id="30318" label="0101000101 (1) 0101000111" source="27297" target="26952" cy:directed="1"/>
      <edge id="30317" label="0101000101 (1) 0101100101" source="27297" target="27202" cy:directed="1"/>
      <edge id="30316" label="0101000101 (1) 0001000101" source="27297" target="27311" cy:directed="1"/>
      <edge id="30315" label="0101100001 (1) 0101100101" source="27296" target="27202" cy:directed="1"/>
      <edge id="30314" label="0101100001 (1) 0101110001" source="27296" target="27201" cy:directed="1"/>
      <edge id="30313" label="0101100001 (1) 0001100001" source="27296" target="27266" cy:directed="1"/>
      <edge id="30312" label="1011110010 (1) 1011110000" source="27295" target="27625" cy:directed="1"/>
      <edge id="30311" label="1011110010 (1) 1011010010" source="27295" target="27588" cy:directed="1"/>
      <edge id="30310" label="1011110010 (1) 1010110010" source="27295" target="27365" cy:directed="1"/>
      <edge id="30309" label="0011110010 (1) 0011110000" source="27294" target="27621" cy:directed="1"/>
      <edge id="30308" label="0011110010 (1) 0011010010" source="27294" target="27585" cy:directed="1"/>
      <edge id="30307" label="0011110010 (1) 0010110010" source="27294" target="27363" cy:directed="1"/>
      <edge id="30306" label="0111110010 (1) 0111110000" source="27293" target="27613" cy:directed="1"/>
      <edge id="30305" label="0111110010 (1) 0110110010" source="27293" target="27349" cy:directed="1"/>
      <edge id="30304" label="0111110010 (1) 0101110010" source="27293" target="27304" cy:directed="1"/>
      <edge id="30303" label="0111110010 (1) 0011110010" source="27293" target="27294" cy:directed="1"/>
      <edge id="30302" label="1111110010 (1) 1111110000" source="27292" target="27617" cy:directed="1"/>
      <edge id="30301" label="1111110010 (1) 1110110010" source="27292" target="27360" cy:directed="1"/>
      <edge id="30300" label="1111110010 (1) 1101110010" source="27292" target="27310" cy:directed="1"/>
      <edge id="30299" label="1111110010 (1) 1011110010" source="27292" target="27295" cy:directed="1"/>
      <edge id="30298" label="1001001110 (1) 1001001010" source="27291" target="27564" cy:directed="1"/>
      <edge id="30297" label="1001001110 (1) 1001000110" source="27291" target="27499" cy:directed="1"/>
      <edge id="30296" label="1001001110 (1) 1011001110" source="27291" target="27258" cy:directed="1"/>
      <edge id="30295" label="1001001110 (1) 1101001110" source="27291" target="27280" cy:directed="1"/>
      <edge id="30294" label="1011001100 (1) 1011001110" source="27290" target="27258" cy:directed="1"/>
      <edge id="30293" label="1011001100 (1) 1011001000" source="27290" target="27549" cy:directed="1"/>
      <edge id="30292" label="1011001100 (1) 1011000100" source="27290" target="27497" cy:directed="1"/>
      <edge id="30291" label="1011001100 (1) 1010001100" source="27290" target="27356" cy:directed="1"/>
      <edge id="30290" label="1011001100 (1) 1111001100" source="27290" target="27257" cy:directed="1"/>
      <edge id="30289" label="0001001110 (1) 0001001010" source="27289" target="27562" cy:directed="1"/>
      <edge id="30288" label="0001001110 (1) 0001000110" source="27289" target="27496" cy:directed="1"/>
      <edge id="30287" label="0001001110 (1) 0011001110" source="27289" target="27256" cy:directed="1"/>
      <edge id="30286" label="0011001100 (1) 0011001110" source="27288" target="27256" cy:directed="1"/>
      <edge id="30285" label="0011001100 (1) 0011001000" source="27288" target="27541" cy:directed="1"/>
      <edge id="30284" label="0011001100 (1) 0011000100" source="27288" target="27494" cy:directed="1"/>
      <edge id="30283" label="0011001100 (1) 0010001100" source="27288" target="27351" cy:directed="1"/>
      <edge id="30282" label="0011000001 (1) 0011000011" source="27287" target="27286" cy:directed="1"/>
      <edge id="30281" label="0011000001 (1) 0011000101" source="27287" target="27285" cy:directed="1"/>
      <edge id="30280" label="0011000001 (1) 0010000001" source="27287" target="27344" cy:directed="1"/>
      <edge id="30279" label="0011000001 (1) 0001000001" source="27287" target="27384" cy:directed="1"/>
      <edge id="30278" label="0011000011 (1) 0011000111" source="27286" target="26933" cy:directed="1"/>
      <edge id="30277" label="0011000011 (1) 0010000011" source="27286" target="27343" cy:directed="1"/>
      <edge id="30276" label="0011000011 (1) 0001000011" source="27286" target="27312" cy:directed="1"/>
      <edge id="30275" label="0011000101 (1) 0011000111" source="27285" target="26933" cy:directed="1"/>
      <edge id="30274" label="0011000101 (1) 0011100101" source="27285" target="27179" cy:directed="1"/>
      <edge id="30273" label="0011000101 (1) 0010000101" source="27285" target="27342" cy:directed="1"/>
      <edge id="30272" label="1011000001 (1) 1011000011" source="27284" target="27283" cy:directed="1"/>
      <edge id="30271" label="1011000001 (1) 1011000101" source="27284" target="27282" cy:directed="1"/>
      <edge id="30270" label="1011000001 (1) 1010000001" source="27284" target="27348" cy:directed="1"/>
      <edge id="30269" label="1011000001 (1) 1001000001" source="27284" target="27380" cy:directed="1"/>
      <edge id="30268" label="1011000001 (1) 1111000001" source="27284" target="27281" cy:directed="1"/>
      <edge id="30267" label="1011000011 (1) 1011000111" source="27283" target="26932" cy:directed="1"/>
      <edge id="30266" label="1011000011 (1) 1010000011" source="27283" target="27347" cy:directed="1"/>
      <edge id="30265" label="1011000011 (1) 1001000011" source="27283" target="27308" cy:directed="1"/>
      <edge id="30264" label="1011000011 (1) 1111000011" source="27283" target="27276" cy:directed="1"/>
      <edge id="30263" label="1011000101 (1) 1011000111" source="27282" target="26932" cy:directed="1"/>
      <edge id="30262" label="1011000101 (1) 1011100101" source="27282" target="27186" cy:directed="1"/>
      <edge id="30261" label="1011000101 (1) 1010000101" source="27282" target="27346" cy:directed="1"/>
      <edge id="30260" label="1011000101 (1) 1111000101" source="27282" target="27275" cy:directed="1"/>
      <edge id="30259" label="1111000001 (1) 1111000011" source="27281" target="27276" cy:directed="1"/>
      <edge id="30258" label="1111000001 (1) 1111000101" source="27281" target="27275" cy:directed="1"/>
      <edge id="30257" label="1111000001 (1) 1111100001" source="27281" target="27274" cy:directed="1"/>
      <edge id="30256" label="1111000001 (1) 1110000001" source="27281" target="27345" cy:directed="1"/>
      <edge id="30255" label="1111000001 (1) 1101000001" source="27281" target="27374" cy:directed="1"/>
      <edge id="30254" label="1101001110 (1) 1101001010" source="27280" target="27560" cy:directed="1"/>
      <edge id="30253" label="1101001110 (1) 1101000110" source="27280" target="27493" cy:directed="1"/>
      <edge id="30252" label="1101001110 (1) 1101101110" source="27280" target="26876" cy:directed="1"/>
      <edge id="30251" label="1101101100 (1) 1101101000" source="27279" target="27559" cy:directed="1"/>
      <edge id="30250" label="1101101100 (1) 1101100100" source="27279" target="27492" cy:directed="1"/>
      <edge id="30249" label="1101101100 (1) 1101111100" source="27279" target="27329" cy:directed="1"/>
      <edge id="30248" label="1101101100 (1) 1111101100" source="27279" target="27249" cy:directed="1"/>
      <edge id="30247" label="0101001110 (1) 0101001010" source="27278" target="27557" cy:directed="1"/>
      <edge id="30246" label="0101001110 (1) 0101000110" source="27278" target="27491" cy:directed="1"/>
      <edge id="30245" label="0101001110 (1) 0101101110" source="27278" target="26875" cy:directed="1"/>
      <edge id="30244" label="0101001110 (1) 0001001110" source="27278" target="27289" cy:directed="1"/>
      <edge id="30243" label="0101101100 (1) 0101101000" source="27277" target="27556" cy:directed="1"/>
      <edge id="30242" label="0101101100 (1) 0101100100" source="27277" target="27490" cy:directed="1"/>
      <edge id="30241" label="0101101100 (1) 0101111100" source="27277" target="27328" cy:directed="1"/>
      <edge id="30240" label="0101101100 (1) 0111101100" source="27277" target="27246" cy:directed="1"/>
      <edge id="30239" label="0101101100 (1) 0001101100" source="27277" target="27244" cy:directed="1"/>
      <edge id="30238" label="1111000011 (1) 1111000111" source="27276" target="26927" cy:directed="1"/>
      <edge id="30237" label="1111000011 (1) 1111100011" source="27276" target="26870" cy:directed="1"/>
      <edge id="30236" label="1111000011 (1) 1110000011" source="27276" target="27334" cy:directed="1"/>
      <edge id="30235" label="1111000011 (1) 1101000011" source="27276" target="27301" cy:directed="1"/>
      <edge id="30234" label="1111000101 (1) 1111000111" source="27275" target="26927" cy:directed="1"/>
      <edge id="30233" label="1111000101 (1) 1111100101" source="27275" target="27175" cy:directed="1"/>
      <edge id="30232" label="1111000101 (1) 1110000101" source="27275" target="27333" cy:directed="1"/>
      <edge id="30231" label="1111000101 (1) 1101000101" source="27275" target="27300" cy:directed="1"/>
      <edge id="30230" label="1111100001 (1) 1111100101" source="27274" target="27175" cy:directed="1"/>
      <edge id="30229" label="1111100001 (1) 1111110001" source="27274" target="27174" cy:directed="1"/>
      <edge id="30228" label="1111100001 (1) 1110100001" source="27274" target="27234" cy:directed="1"/>
      <edge id="30227" label="1111100001 (1) 1101100001" source="27274" target="27299" cy:directed="1"/>
      <edge id="30226" label="0111000001 (1) 0111000011" source="27273" target="27272" cy:directed="1"/>
      <edge id="30225" label="0111000001 (1) 0111000101" source="27273" target="27271" cy:directed="1"/>
      <edge id="30224" label="0111000001 (1) 0111100001" source="27273" target="27270" cy:directed="1"/>
      <edge id="30223" label="0111000001 (1) 0110000001" source="27273" target="27332" cy:directed="1"/>
      <edge id="30222" label="0111000001 (1) 0101000001" source="27273" target="27370" cy:directed="1"/>
      <edge id="30221" label="0111000001 (1) 0011000001" source="27273" target="27287" cy:directed="1"/>
      <edge id="30220" label="0111000011 (1) 0111000111" source="27272" target="26926" cy:directed="1"/>
      <edge id="30219" label="0111000011 (1) 0111100011" source="27272" target="26874" cy:directed="1"/>
      <edge id="30218" label="0111000011 (1) 0110000011" source="27272" target="27331" cy:directed="1"/>
      <edge id="30217" label="0111000011 (1) 0101000011" source="27272" target="27298" cy:directed="1"/>
      <edge id="30216" label="0111000011 (1) 0011000011" source="27272" target="27286" cy:directed="1"/>
      <edge id="30215" label="0111000101 (1) 0111000111" source="27271" target="26926" cy:directed="1"/>
      <edge id="30214" label="0111000101 (1) 0111100101" source="27271" target="27169" cy:directed="1"/>
      <edge id="30213" label="0111000101 (1) 0110000101" source="27271" target="27330" cy:directed="1"/>
      <edge id="30212" label="0111000101 (1) 0101000101" source="27271" target="27297" cy:directed="1"/>
      <edge id="30211" label="0111000101 (1) 0011000101" source="27271" target="27285" cy:directed="1"/>
      <edge id="30210" label="0111100001 (1) 0111100101" source="27270" target="27169" cy:directed="1"/>
      <edge id="30209" label="0111100001 (1) 0111110001" source="27270" target="27168" cy:directed="1"/>
      <edge id="30208" label="0111100001 (1) 0110100001" source="27270" target="27228" cy:directed="1"/>
      <edge id="30207" label="0111100001 (1) 0101100001" source="27270" target="27296" cy:directed="1"/>
      <edge id="30206" label="0111100001 (1) 0011100001" source="27270" target="27213" cy:directed="1"/>
      <edge id="30205" label="0000100001 (1) 0000100101" source="27269" target="27268" cy:directed="1"/>
      <edge id="30204" label="0000100001 (1) 0000110001" source="27269" target="27267" cy:directed="1"/>
      <edge id="30203" label="0000100001 (1) 0000000001" source="27269" target="27387" cy:directed="1"/>
      <edge id="30202" label="0000100001 (1) 0001100001" source="27269" target="27266" cy:directed="1"/>
      <edge id="30201" label="0000100001 (1) 0010100001" source="27269" target="27265" cy:directed="1"/>
      <edge id="30200" label="0000100101 (1) 0000110101" source="27268" target="27067" cy:directed="1"/>
      <edge id="30199" label="0000100101 (1) 0001100101" source="27268" target="27215" cy:directed="1"/>
      <edge id="30198" label="0000100101 (1) 0010100101" source="27268" target="27238" cy:directed="1"/>
      <edge id="30197" label="0000110001 (1) 0000110101" source="27267" target="27067" cy:directed="1"/>
      <edge id="30196" label="0000110001 (1) 0000111001" source="27267" target="27066" cy:directed="1"/>
      <edge id="30195" label="0000110001 (1) 0000010001" source="27267" target="27220" cy:directed="1"/>
      <edge id="30194" label="0000110001 (1) 0001110001" source="27267" target="27214" cy:directed="1"/>
      <edge id="30193" label="0000110001 (1) 0010110001" source="27267" target="27237" cy:directed="1"/>
      <edge id="30192" label="0001100001 (1) 0001100101" source="27266" target="27215" cy:directed="1"/>
      <edge id="30191" label="0001100001 (1) 0001110001" source="27266" target="27214" cy:directed="1"/>
      <edge id="30190" label="0001100001 (1) 0001000001" source="27266" target="27384" cy:directed="1"/>
      <edge id="30189" label="0001100001 (1) 0011100001" source="27266" target="27213" cy:directed="1"/>
      <edge id="30188" label="0010100001 (1) 0010100101" source="27265" target="27238" cy:directed="1"/>
      <edge id="30187" label="0010100001 (1) 0010110001" source="27265" target="27237" cy:directed="1"/>
      <edge id="30186" label="0010100001 (1) 0010000001" source="27265" target="27344" cy:directed="1"/>
      <edge id="30185" label="1000100001 (1) 1000100101" source="27264" target="27263" cy:directed="1"/>
      <edge id="30184" label="1000100001 (1) 1000110001" source="27264" target="27262" cy:directed="1"/>
      <edge id="30183" label="1000100001 (1) 1000000001" source="27264" target="27383" cy:directed="1"/>
      <edge id="30182" label="1000100001 (1) 1001100001" source="27264" target="27261" cy:directed="1"/>
      <edge id="30181" label="1000100001 (1) 1010100001" source="27264" target="27260" cy:directed="1"/>
      <edge id="30180" label="1000100001 (1) 1100100001" source="27264" target="27259" cy:directed="1"/>
      <edge id="30179" label="1000100101 (1) 1000110101" source="27263" target="27072" cy:directed="1"/>
      <edge id="30178" label="1000100101 (1) 1001100101" source="27263" target="27212" cy:directed="1"/>
      <edge id="30177" label="1000100101 (1) 1010100101" source="27263" target="27236" cy:directed="1"/>
      <edge id="30176" label="1000100101 (1) 1100100101" source="27263" target="27255" cy:directed="1"/>
      <edge id="30175" label="1000110001 (1) 1000110101" source="27262" target="27072" cy:directed="1"/>
      <edge id="30174" label="1000110001 (1) 1000111001" source="27262" target="27071" cy:directed="1"/>
      <edge id="30173" label="1000110001 (1) 1000010001" source="27262" target="27225" cy:directed="1"/>
      <edge id="30172" label="1000110001 (1) 1001110001" source="27262" target="27211" cy:directed="1"/>
      <edge id="30171" label="1000110001 (1) 1010110001" source="27262" target="27235" cy:directed="1"/>
      <edge id="30170" label="1001100001 (1) 1001100101" source="27261" target="27212" cy:directed="1"/>
      <edge id="30169" label="1001100001 (1) 1001110001" source="27261" target="27211" cy:directed="1"/>
      <edge id="30168" label="1001100001 (1) 1001000001" source="27261" target="27380" cy:directed="1"/>
      <edge id="30167" label="1001100001 (1) 1011100001" source="27261" target="27210" cy:directed="1"/>
      <edge id="30166" label="1001100001 (1) 1101100001" source="27261" target="27299" cy:directed="1"/>
      <edge id="30165" label="1010100001 (1) 1010100101" source="27260" target="27236" cy:directed="1"/>
      <edge id="30164" label="1010100001 (1) 1010110001" source="27260" target="27235" cy:directed="1"/>
      <edge id="30163" label="1010100001 (1) 1010000001" source="27260" target="27348" cy:directed="1"/>
      <edge id="30162" label="1010100001 (1) 1110100001" source="27260" target="27234" cy:directed="1"/>
      <edge id="30161" label="1100100001 (1) 1100100101" source="27259" target="27255" cy:directed="1"/>
      <edge id="30160" label="1100100001 (1) 1100110001" source="27259" target="27254" cy:directed="1"/>
      <edge id="30159" label="1100100001 (1) 1100000001" source="27259" target="27379" cy:directed="1"/>
      <edge id="30158" label="1100100001 (1) 1101100001" source="27259" target="27299" cy:directed="1"/>
      <edge id="30157" label="1011001110 (1) 1011001010" source="27258" target="27548" cy:directed="1"/>
      <edge id="30156" label="1011001110 (1) 1011000110" source="27258" target="27481" cy:directed="1"/>
      <edge id="30155" label="1011001110 (1) 1010001110" source="27258" target="27321" cy:directed="1"/>
      <edge id="30154" label="1011001110 (1) 1111001110" source="27258" target="27250" cy:directed="1"/>
      <edge id="30153" label="1111001100 (1) 1111001110" source="27257" target="27250" cy:directed="1"/>
      <edge id="30152" label="1111001100 (1) 1111001000" source="27257" target="27547" cy:directed="1"/>
      <edge id="30151" label="1111001100 (1) 1111000100" source="27257" target="27479" cy:directed="1"/>
      <edge id="30150" label="1111001100 (1) 1111101100" source="27257" target="27249" cy:directed="1"/>
      <edge id="30149" label="1111001100 (1) 1110001100" source="27257" target="27320" cy:directed="1"/>
      <edge id="30148" label="1111001100 (1) 1101001100" source="27257" target="27339" cy:directed="1"/>
      <edge id="30147" label="0011001110 (1) 0011001010" source="27256" target="27540" cy:directed="1"/>
      <edge id="30146" label="0011001110 (1) 0011000110" source="27256" target="27478" cy:directed="1"/>
      <edge id="30145" label="0011001110 (1) 0010001110" source="27256" target="27317" cy:directed="1"/>
      <edge id="30144" label="1100100101 (1) 1100110101" source="27255" target="27061" cy:directed="1"/>
      <edge id="30143" label="1100100101 (1) 1101100101" source="27255" target="27209" cy:directed="1"/>
      <edge id="30142" label="1100100101 (1) 1110100101" source="27255" target="27230" cy:directed="1"/>
      <edge id="30141" label="1100110001 (1) 1100110101" source="27254" target="27061" cy:directed="1"/>
      <edge id="30140" label="1100110001 (1) 1100111001" source="27254" target="27060" cy:directed="1"/>
      <edge id="30139" label="1100110001 (1) 1100010001" source="27254" target="27207" cy:directed="1"/>
      <edge id="30138" label="1100110001 (1) 1101110001" source="27254" target="27208" cy:directed="1"/>
      <edge id="30137" label="1100110001 (1) 1000110001" source="27254" target="27262" cy:directed="1"/>
      <edge id="30136" label="0100100001 (1) 0100100101" source="27253" target="27252" cy:directed="1"/>
      <edge id="30135" label="0100100001 (1) 0100110001" source="27253" target="27251" cy:directed="1"/>
      <edge id="30134" label="0100100001 (1) 0100000001" source="27253" target="27373" cy:directed="1"/>
      <edge id="30133" label="0100100001 (1) 0101100001" source="27253" target="27296" cy:directed="1"/>
      <edge id="30132" label="0100100001 (1) 0000100001" source="27253" target="27269" cy:directed="1"/>
      <edge id="30131" label="0100100101 (1) 0100110101" source="27252" target="27059" cy:directed="1"/>
      <edge id="30130" label="0100100101 (1) 0101100101" source="27252" target="27202" cy:directed="1"/>
      <edge id="30129" label="0100100101 (1) 0110100101" source="27252" target="27227" cy:directed="1"/>
      <edge id="30128" label="0100100101 (1) 0000100101" source="27252" target="27268" cy:directed="1"/>
      <edge id="30127" label="0100110001 (1) 0100110101" source="27251" target="27059" cy:directed="1"/>
      <edge id="30126" label="0100110001 (1) 0100111001" source="27251" target="27058" cy:directed="1"/>
      <edge id="30125" label="0100110001 (1) 0100010001" source="27251" target="27200" cy:directed="1"/>
      <edge id="30124" label="0100110001 (1) 0101110001" source="27251" target="27201" cy:directed="1"/>
      <edge id="30123" label="0100110001 (1) 0000110001" source="27251" target="27267" cy:directed="1"/>
      <edge id="30122" label="1111001110 (1) 1111001010" source="27250" target="27535" cy:directed="1"/>
      <edge id="30121" label="1111001110 (1) 1111000110" source="27250" target="27474" cy:directed="1"/>
      <edge id="30120" label="1111001110 (1) 1111101110" source="27250" target="26849" cy:directed="1"/>
      <edge id="30119" label="1111001110 (1) 1110001110" source="27250" target="27305" cy:directed="1"/>
      <edge id="30118" label="1111001110 (1) 1101001110" source="27250" target="27280" cy:directed="1"/>
      <edge id="30117" label="1111101100 (1) 1111101000" source="27249" target="27534" cy:directed="1"/>
      <edge id="30116" label="1111101100 (1) 1111100100" source="27249" target="27473" cy:directed="1"/>
      <edge id="30115" label="1111101100 (1) 1111111100" source="27249" target="27303" cy:directed="1"/>
      <edge id="30114" label="1111101100 (1) 1110101100" source="27249" target="27233" cy:directed="1"/>
      <edge id="30113" label="0111001100 (1) 0111001110" source="27248" target="27247" cy:directed="1"/>
      <edge id="30112" label="0111001100 (1) 0111001000" source="27248" target="27528" cy:directed="1"/>
      <edge id="30111" label="0111001100 (1) 0111000100" source="27248" target="27472" cy:directed="1"/>
      <edge id="30110" label="0111001100 (1) 0111101100" source="27248" target="27246" cy:directed="1"/>
      <edge id="30109" label="0111001100 (1) 0110001100" source="27248" target="27314" cy:directed="1"/>
      <edge id="30108" label="0111001100 (1) 0101001100" source="27248" target="27335" cy:directed="1"/>
      <edge id="30107" label="0111001100 (1) 0011001100" source="27248" target="27288" cy:directed="1"/>
      <edge id="30106" label="0111001110 (1) 0111001010" source="27247" target="27527" cy:directed="1"/>
      <edge id="30105" label="0111001110 (1) 0111000110" source="27247" target="27471" cy:directed="1"/>
      <edge id="30104" label="0111001110 (1) 0111101110" source="27247" target="26848" cy:directed="1"/>
      <edge id="30103" label="0111001110 (1) 0110001110" source="27247" target="27313" cy:directed="1"/>
      <edge id="30102" label="0111001110 (1) 0101001110" source="27247" target="27278" cy:directed="1"/>
      <edge id="30101" label="0111001110 (1) 0011001110" source="27247" target="27256" cy:directed="1"/>
      <edge id="30100" label="0111101100 (1) 0111101000" source="27246" target="27526" cy:directed="1"/>
      <edge id="30099" label="0111101100 (1) 0111100100" source="27246" target="27470" cy:directed="1"/>
      <edge id="30098" label="0111101100 (1) 0111111100" source="27246" target="27302" cy:directed="1"/>
      <edge id="30097" label="0111101100 (1) 0110101100" source="27246" target="27231" cy:directed="1"/>
      <edge id="30096" label="0111101100 (1) 0011101100" source="27246" target="27184" cy:directed="1"/>
      <edge id="30095" label="0000101100 (1) 0000101000" source="27245" target="27523" cy:directed="1"/>
      <edge id="30094" label="0000101100 (1) 0000100100" source="27245" target="27544" cy:directed="1"/>
      <edge id="30093" label="0000101100 (1) 0000111100" source="27245" target="27416" cy:directed="1"/>
      <edge id="30092" label="0000101100 (1) 0000001100" source="27245" target="27354" cy:directed="1"/>
      <edge id="30091" label="0000101100 (1) 0001101100" source="27245" target="27244" cy:directed="1"/>
      <edge id="30090" label="0000101100 (1) 0010101100" source="27245" target="27243" cy:directed="1"/>
      <edge id="30089" label="0001101100 (1) 0001101000" source="27244" target="27522" cy:directed="1"/>
      <edge id="30088" label="0001101100 (1) 0001100100" source="27244" target="27495" cy:directed="1"/>
      <edge id="30087" label="0001101100 (1) 0001111100" source="27244" target="27338" cy:directed="1"/>
      <edge id="30086" label="0001101100 (1) 0001001100" source="27244" target="27352" cy:directed="1"/>
      <edge id="30085" label="0001101100 (1) 0011101100" source="27244" target="27184" cy:directed="1"/>
      <edge id="30084" label="0010101100 (1) 0010101000" source="27243" target="27521" cy:directed="1"/>
      <edge id="30083" label="0010101100 (1) 0010100100" source="27243" target="27512" cy:directed="1"/>
      <edge id="30082" label="0010101100 (1) 0010111100" source="27243" target="27390" cy:directed="1"/>
      <edge id="30081" label="0010101100 (1) 0010001100" source="27243" target="27351" cy:directed="1"/>
      <edge id="30080" label="1000101100 (1) 1000101000" source="27242" target="27520" cy:directed="1"/>
      <edge id="30079" label="1000101100 (1) 1000100100" source="27242" target="27553" cy:directed="1"/>
      <edge id="30078" label="1000101100 (1) 1000111100" source="27242" target="27417" cy:directed="1"/>
      <edge id="30077" label="1000101100 (1) 1000001100" source="27242" target="27359" cy:directed="1"/>
      <edge id="30076" label="1000101100 (1) 1001101100" source="27242" target="27241" cy:directed="1"/>
      <edge id="30075" label="1000101100 (1) 1010101100" source="27242" target="27240" cy:directed="1"/>
      <edge id="30074" label="1000101100 (1) 1100101100" source="27242" target="27239" cy:directed="1"/>
      <edge id="30073" label="1001101100 (1) 1001101000" source="27241" target="27519" cy:directed="1"/>
      <edge id="30072" label="1001101100 (1) 1001100100" source="27241" target="27498" cy:directed="1"/>
      <edge id="30071" label="1001101100 (1) 1001111100" source="27241" target="27341" cy:directed="1"/>
      <edge id="30070" label="1001101100 (1) 1001001100" source="27241" target="27357" cy:directed="1"/>
      <edge id="30069" label="1001101100 (1) 1011101100" source="27241" target="27193" cy:directed="1"/>
      <edge id="30068" label="1001101100 (1) 1101101100" source="27241" target="27279" cy:directed="1"/>
      <edge id="30067" label="1010101100 (1) 1010101000" source="27240" target="27518" cy:directed="1"/>
      <edge id="30066" label="1010101100 (1) 1010100100" source="27240" target="27515" cy:directed="1"/>
      <edge id="30065" label="1010101100 (1) 1010111100" source="27240" target="27392" cy:directed="1"/>
      <edge id="30064" label="1010101100 (1) 1010001100" source="27240" target="27356" cy:directed="1"/>
      <edge id="30063" label="1010101100 (1) 1110101100" source="27240" target="27233" cy:directed="1"/>
      <edge id="30062" label="1100101100 (1) 1100101000" source="27239" target="27517" cy:directed="1"/>
      <edge id="30061" label="1100101100 (1) 1100100100" source="27239" target="27537" cy:directed="1"/>
      <edge id="30060" label="1100101100 (1) 1100111100" source="27239" target="27414" cy:directed="1"/>
      <edge id="30059" label="1100101100 (1) 1100001100" source="27239" target="27355" cy:directed="1"/>
      <edge id="30058" label="1100101100 (1) 1101101100" source="27239" target="27279" cy:directed="1"/>
      <edge id="30057" label="1100101100 (1) 1110101100" source="27239" target="27233" cy:directed="1"/>
      <edge id="30056" label="0010100101 (1) 0010110101" source="27238" target="27047" cy:directed="1"/>
      <edge id="30055" label="0010110001 (1) 0010110101" source="27237" target="27047" cy:directed="1"/>
      <edge id="30054" label="0010110001 (1) 0010111001" source="27237" target="27046" cy:directed="1"/>
      <edge id="30053" label="0010110001 (1) 0010010001" source="27237" target="27183" cy:directed="1"/>
      <edge id="30052" label="1010100101 (1) 1010110101" source="27236" target="27050" cy:directed="1"/>
      <edge id="30051" label="1010100101 (1) 1110100101" source="27236" target="27230" cy:directed="1"/>
      <edge id="30050" label="1010110001 (1) 1010110101" source="27235" target="27050" cy:directed="1"/>
      <edge id="30049" label="1010110001 (1) 1010111001" source="27235" target="27049" cy:directed="1"/>
      <edge id="30048" label="1010110001 (1) 1010010001" source="27235" target="27192" cy:directed="1"/>
      <edge id="30047" label="1110100001 (1) 1110100101" source="27234" target="27230" cy:directed="1"/>
      <edge id="30046" label="1110100001 (1) 1110110001" source="27234" target="27229" cy:directed="1"/>
      <edge id="30045" label="1110100001 (1) 1110000001" source="27234" target="27345" cy:directed="1"/>
      <edge id="30044" label="1110100001 (1) 1100100001" source="27234" target="27259" cy:directed="1"/>
      <edge id="30043" label="1110101100 (1) 1110101000" source="27233" target="27501" cy:directed="1"/>
      <edge id="30042" label="1110101100 (1) 1110100100" source="27233" target="27508" cy:directed="1"/>
      <edge id="30041" label="1110101100 (1) 1110111100" source="27233" target="27378" cy:directed="1"/>
      <edge id="30040" label="1110101100 (1) 1110001100" source="27233" target="27320" cy:directed="1"/>
      <edge id="30039" label="0100101100 (1) 0100101000" source="27232" target="27511" cy:directed="1"/>
      <edge id="30038" label="0100101100 (1) 0100100100" source="27232" target="27530" cy:directed="1"/>
      <edge id="30037" label="0100101100 (1) 0100111100" source="27232" target="27411" cy:directed="1"/>
      <edge id="30036" label="0100101100 (1) 0100001100" source="27232" target="27337" cy:directed="1"/>
      <edge id="30035" label="0100101100 (1) 0101101100" source="27232" target="27277" cy:directed="1"/>
      <edge id="30034" label="0100101100 (1) 0110101100" source="27232" target="27231" cy:directed="1"/>
      <edge id="30033" label="0100101100 (1) 0000101100" source="27232" target="27245" cy:directed="1"/>
      <edge id="30032" label="0110101100 (1) 0110101000" source="27231" target="27500" cy:directed="1"/>
      <edge id="30031" label="0110101100 (1) 0110100100" source="27231" target="27504" cy:directed="1"/>
      <edge id="30030" label="0110101100 (1) 0110111100" source="27231" target="27377" cy:directed="1"/>
      <edge id="30029" label="0110101100 (1) 0110001100" source="27231" target="27314" cy:directed="1"/>
      <edge id="30028" label="0110101100 (1) 0010101100" source="27231" target="27243" cy:directed="1"/>
      <edge id="30027" label="1110100101 (1) 1110110101" source="27230" target="27034" cy:directed="1"/>
      <edge id="30026" label="1110110001 (1) 1110110101" source="27229" target="27034" cy:directed="1"/>
      <edge id="30025" label="1110110001 (1) 1110111001" source="27229" target="27033" cy:directed="1"/>
      <edge id="30024" label="1110110001 (1) 1110010001" source="27229" target="27173" cy:directed="1"/>
      <edge id="30023" label="1110110001 (1) 1100110001" source="27229" target="27254" cy:directed="1"/>
      <edge id="30022" label="1110110001 (1) 1010110001" source="27229" target="27235" cy:directed="1"/>
      <edge id="30021" label="0110100001 (1) 0110100101" source="27228" target="27227" cy:directed="1"/>
      <edge id="30020" label="0110100001 (1) 0110110001" source="27228" target="27226" cy:directed="1"/>
      <edge id="30019" label="0110100001 (1) 0110000001" source="27228" target="27332" cy:directed="1"/>
      <edge id="30018" label="0110100001 (1) 0100100001" source="27228" target="27253" cy:directed="1"/>
      <edge id="30017" label="0110100001 (1) 0010100001" source="27228" target="27265" cy:directed="1"/>
      <edge id="30016" label="0110100101 (1) 0110110101" source="27227" target="27029" cy:directed="1"/>
      <edge id="30015" label="0110100101 (1) 0010100101" source="27227" target="27238" cy:directed="1"/>
      <edge id="30014" label="0110110001 (1) 0110110101" source="27226" target="27029" cy:directed="1"/>
      <edge id="30013" label="0110110001 (1) 0110111001" source="27226" target="27028" cy:directed="1"/>
      <edge id="30012" label="0110110001 (1) 0110010001" source="27226" target="27167" cy:directed="1"/>
      <edge id="30011" label="0110110001 (1) 0100110001" source="27226" target="27251" cy:directed="1"/>
      <edge id="30010" label="0110110001 (1) 0010110001" source="27226" target="27237" cy:directed="1"/>
      <edge id="30009" label="1000010001 (1) 1000010011" source="27225" target="27224" cy:directed="1"/>
      <edge id="30008" label="1000010001 (1) 1000010101" source="27225" target="27223" cy:directed="1"/>
      <edge id="30007" label="1000010001 (1) 1000011001" source="27225" target="27222" cy:directed="1"/>
      <edge id="30006" label="1000010001 (1) 1000000001" source="27225" target="27383" cy:directed="1"/>
      <edge id="30005" label="1000010001 (1) 1001010001" source="27225" target="27221" cy:directed="1"/>
      <edge id="30004" label="1000010011 (1) 1000010111" source="27224" target="26893" cy:directed="1"/>
      <edge id="30003" label="1000010011 (1) 1000000011" source="27224" target="27382" cy:directed="1"/>
      <edge id="30002" label="1000010011 (1) 1001010011" source="27224" target="27153" cy:directed="1"/>
      <edge id="30001" label="1000010101 (1) 1000010111" source="27223" target="26893" cy:directed="1"/>
      <edge id="30000" label="1000010101 (1) 1000011101" source="27223" target="26942" cy:directed="1"/>
      <edge id="29999" label="1000010101 (1) 1000000101" source="27223" target="27381" cy:directed="1"/>
      <edge id="29998" label="1000010101 (1) 1000110101" source="27223" target="27072" cy:directed="1"/>
      <edge id="29997" label="1000010101 (1) 1001010101" source="27223" target="27152" cy:directed="1"/>
      <edge id="29996" label="1000010101 (1) 1010010101" source="27223" target="27190" cy:directed="1"/>
      <edge id="29995" label="1000011001 (1) 1000011011" source="27222" target="26943" cy:directed="1"/>
      <edge id="29994" label="1000011001 (1) 1000011101" source="27222" target="26942" cy:directed="1"/>
      <edge id="29993" label="1000011001 (1) 1000001001" source="27222" target="27127" cy:directed="1"/>
      <edge id="29992" label="1000011001 (1) 1001011001" source="27222" target="27151" cy:directed="1"/>
      <edge id="29991" label="1001010001 (1) 1001010011" source="27221" target="27153" cy:directed="1"/>
      <edge id="29990" label="1001010001 (1) 1001010101" source="27221" target="27152" cy:directed="1"/>
      <edge id="29989" label="1001010001 (1) 1001011001" source="27221" target="27151" cy:directed="1"/>
      <edge id="29988" label="1001010001 (1) 1001000001" source="27221" target="27380" cy:directed="1"/>
      <edge id="29987" label="0000010001 (1) 0000010011" source="27220" target="27219" cy:directed="1"/>
      <edge id="29986" label="0000010001 (1) 0000010101" source="27220" target="27218" cy:directed="1"/>
      <edge id="29985" label="0000010001 (1) 0000011001" source="27220" target="27217" cy:directed="1"/>
      <edge id="29984" label="0000010001 (1) 0000000001" source="27220" target="27387" cy:directed="1"/>
      <edge id="29983" label="0000010001 (1) 0001010001" source="27220" target="27216" cy:directed="1"/>
      <edge id="29982" label="0000010011 (1) 0000010111" source="27219" target="26890" cy:directed="1"/>
      <edge id="29981" label="0000010011 (1) 0000000011" source="27219" target="27386" cy:directed="1"/>
      <edge id="29980" label="0000010011 (1) 0001010011" source="27219" target="27150" cy:directed="1"/>
      <edge id="29979" label="0000010101 (1) 0000010111" source="27218" target="26890" cy:directed="1"/>
      <edge id="29978" label="0000010101 (1) 0000011101" source="27218" target="26940" cy:directed="1"/>
      <edge id="29977" label="0000010101 (1) 0000000101" source="27218" target="27385" cy:directed="1"/>
      <edge id="29976" label="0000010101 (1) 0000110101" source="27218" target="27067" cy:directed="1"/>
      <edge id="29975" label="0000010101 (1) 0001010101" source="27218" target="27149" cy:directed="1"/>
      <edge id="29974" label="0000010101 (1) 0010010101" source="27218" target="27181" cy:directed="1"/>
      <edge id="29973" label="0000011001 (1) 0000011011" source="27217" target="26941" cy:directed="1"/>
      <edge id="29972" label="0000011001 (1) 0000011101" source="27217" target="26940" cy:directed="1"/>
      <edge id="29971" label="0000011001 (1) 0000001001" source="27217" target="27122" cy:directed="1"/>
      <edge id="29970" label="0000011001 (1) 0001011001" source="27217" target="27148" cy:directed="1"/>
      <edge id="29969" label="0001010001 (1) 0001010011" source="27216" target="27150" cy:directed="1"/>
      <edge id="29968" label="0001010001 (1) 0001010101" source="27216" target="27149" cy:directed="1"/>
      <edge id="29967" label="0001010001 (1) 0001011001" source="27216" target="27148" cy:directed="1"/>
      <edge id="29966" label="0001010001 (1) 0001000001" source="27216" target="27384" cy:directed="1"/>
      <edge id="29965" label="0001100101 (1) 0001110101" source="27215" target="27003" cy:directed="1"/>
      <edge id="29964" label="0001100101 (1) 0011100101" source="27215" target="27179" cy:directed="1"/>
      <edge id="29963" label="0001110001 (1) 0001110101" source="27214" target="27003" cy:directed="1"/>
      <edge id="29962" label="0001110001 (1) 0001111001" source="27214" target="27002" cy:directed="1"/>
      <edge id="29961" label="0001110001 (1) 0001010001" source="27214" target="27216" cy:directed="1"/>
      <edge id="29960" label="0001110001 (1) 0011110001" source="27214" target="27178" cy:directed="1"/>
      <edge id="29959" label="0011100001 (1) 0011100101" source="27213" target="27179" cy:directed="1"/>
      <edge id="29958" label="0011100001 (1) 0011110001" source="27213" target="27178" cy:directed="1"/>
      <edge id="29957" label="0011100001 (1) 0011000001" source="27213" target="27287" cy:directed="1"/>
      <edge id="29956" label="0011100001 (1) 0010100001" source="27213" target="27265" cy:directed="1"/>
      <edge id="29955" label="1001100101 (1) 1001110101" source="27212" target="27009" cy:directed="1"/>
      <edge id="29954" label="1001100101 (1) 1011100101" source="27212" target="27186" cy:directed="1"/>
      <edge id="29953" label="1001100101 (1) 1101100101" source="27212" target="27209" cy:directed="1"/>
      <edge id="29952" label="1001110001 (1) 1001110101" source="27211" target="27009" cy:directed="1"/>
      <edge id="29951" label="1001110001 (1) 1001111001" source="27211" target="27008" cy:directed="1"/>
      <edge id="29950" label="1001110001 (1) 1001010001" source="27211" target="27221" cy:directed="1"/>
      <edge id="29949" label="1001110001 (1) 1011110001" source="27211" target="27185" cy:directed="1"/>
      <edge id="29948" label="1011100001 (1) 1011100101" source="27210" target="27186" cy:directed="1"/>
      <edge id="29947" label="1011100001 (1) 1011110001" source="27210" target="27185" cy:directed="1"/>
      <edge id="29946" label="1011100001 (1) 1011000001" source="27210" target="27284" cy:directed="1"/>
      <edge id="29945" label="1011100001 (1) 1010100001" source="27210" target="27260" cy:directed="1"/>
      <edge id="29944" label="1011100001 (1) 1111100001" source="27210" target="27274" cy:directed="1"/>
      <edge id="29943" label="1101100101 (1) 1101110101" source="27209" target="26997" cy:directed="1"/>
      <edge id="29942" label="1101100101 (1) 1111100101" source="27209" target="27175" cy:directed="1"/>
      <edge id="29941" label="1101110001 (1) 1101110101" source="27208" target="26997" cy:directed="1"/>
      <edge id="29940" label="1101110001 (1) 1101111001" source="27208" target="26996" cy:directed="1"/>
      <edge id="29939" label="1101110001 (1) 1001110001" source="27208" target="27211" cy:directed="1"/>
      <edge id="29938" label="1100010001 (1) 1100010011" source="27207" target="27206" cy:directed="1"/>
      <edge id="29937" label="1100010001 (1) 1100010101" source="27207" target="27205" cy:directed="1"/>
      <edge id="29936" label="1100010001 (1) 1100011001" source="27207" target="27204" cy:directed="1"/>
      <edge id="29935" label="1100010001 (1) 1100000001" source="27207" target="27379" cy:directed="1"/>
      <edge id="29934" label="1100010001 (1) 1101010001" source="27207" target="27203" cy:directed="1"/>
      <edge id="29933" label="1100010001 (1) 1000010001" source="27207" target="27225" cy:directed="1"/>
      <edge id="29932" label="1100010011 (1) 1100010111" source="27206" target="26885" cy:directed="1"/>
      <edge id="29931" label="1100010011 (1) 1100000011" source="27206" target="27376" cy:directed="1"/>
      <edge id="29930" label="1100010011 (1) 1101010011" source="27206" target="27138" cy:directed="1"/>
      <edge id="29929" label="1100010011 (1) 1000010011" source="27206" target="27224" cy:directed="1"/>
      <edge id="29928" label="1100010101 (1) 1100010111" source="27205" target="26885" cy:directed="1"/>
      <edge id="29927" label="1100010101 (1) 1100011101" source="27205" target="26936" cy:directed="1"/>
      <edge id="29926" label="1100010101 (1) 1100000101" source="27205" target="27375" cy:directed="1"/>
      <edge id="29925" label="1100010101 (1) 1100110101" source="27205" target="27061" cy:directed="1"/>
      <edge id="29924" label="1100010101 (1) 1101010101" source="27205" target="27137" cy:directed="1"/>
      <edge id="29923" label="1100010101 (1) 1000010101" source="27205" target="27223" cy:directed="1"/>
      <edge id="29922" label="1100011001 (1) 1100011011" source="27204" target="26937" cy:directed="1"/>
      <edge id="29921" label="1100011001 (1) 1100011101" source="27204" target="26936" cy:directed="1"/>
      <edge id="29920" label="1100011001 (1) 1100001001" source="27204" target="27123" cy:directed="1"/>
      <edge id="29919" label="1100011001 (1) 1101011001" source="27204" target="27136" cy:directed="1"/>
      <edge id="29918" label="1100011001 (1) 1000011001" source="27204" target="27222" cy:directed="1"/>
      <edge id="29917" label="1101010001 (1) 1101010011" source="27203" target="27138" cy:directed="1"/>
      <edge id="29916" label="1101010001 (1) 1101010101" source="27203" target="27137" cy:directed="1"/>
      <edge id="29915" label="1101010001 (1) 1101011001" source="27203" target="27136" cy:directed="1"/>
      <edge id="29914" label="1101010001 (1) 1101000001" source="27203" target="27374" cy:directed="1"/>
      <edge id="29913" label="1101010001 (1) 1101110001" source="27203" target="27208" cy:directed="1"/>
      <edge id="29912" label="1101010001 (1) 1001010001" source="27203" target="27221" cy:directed="1"/>
      <edge id="29911" label="0101100101 (1) 0101110101" source="27202" target="26995" cy:directed="1"/>
      <edge id="29910" label="0101100101 (1) 0111100101" source="27202" target="27169" cy:directed="1"/>
      <edge id="29909" label="0101100101 (1) 0001100101" source="27202" target="27215" cy:directed="1"/>
      <edge id="29908" label="0101110001 (1) 0101110101" source="27201" target="26995" cy:directed="1"/>
      <edge id="29907" label="0101110001 (1) 0101111001" source="27201" target="26994" cy:directed="1"/>
      <edge id="29906" label="0101110001 (1) 0001110001" source="27201" target="27214" cy:directed="1"/>
      <edge id="29905" label="0100010001 (1) 0100010011" source="27200" target="27199" cy:directed="1"/>
      <edge id="29904" label="0100010001 (1) 0100010101" source="27200" target="27198" cy:directed="1"/>
      <edge id="29903" label="0100010001 (1) 0100011001" source="27200" target="27197" cy:directed="1"/>
      <edge id="29902" label="0100010001 (1) 0100000001" source="27200" target="27373" cy:directed="1"/>
      <edge id="29901" label="0100010001 (1) 0101010001" source="27200" target="27196" cy:directed="1"/>
      <edge id="29900" label="0100010001 (1) 0000010001" source="27200" target="27220" cy:directed="1"/>
      <edge id="29899" label="0100010011 (1) 0100010111" source="27199" target="26884" cy:directed="1"/>
      <edge id="29898" label="0100010011 (1) 0100000011" source="27199" target="27372" cy:directed="1"/>
      <edge id="29897" label="0100010011 (1) 0101010011" source="27199" target="27135" cy:directed="1"/>
      <edge id="29896" label="0100010011 (1) 0000010011" source="27199" target="27219" cy:directed="1"/>
      <edge id="29895" label="0100010101 (1) 0100010111" source="27198" target="26884" cy:directed="1"/>
      <edge id="29894" label="0100010101 (1) 0100011101" source="27198" target="26928" cy:directed="1"/>
      <edge id="29893" label="0100010101 (1) 0100000101" source="27198" target="27371" cy:directed="1"/>
      <edge id="29892" label="0100010101 (1) 0100110101" source="27198" target="27059" cy:directed="1"/>
      <edge id="29891" label="0100010101 (1) 0101010101" source="27198" target="27134" cy:directed="1"/>
      <edge id="29890" label="0100010101 (1) 0000010101" source="27198" target="27218" cy:directed="1"/>
      <edge id="29889" label="0100011001 (1) 0100011011" source="27197" target="26929" cy:directed="1"/>
      <edge id="29888" label="0100011001 (1) 0100011101" source="27197" target="26928" cy:directed="1"/>
      <edge id="29887" label="0100011001 (1) 0100001001" source="27197" target="27113" cy:directed="1"/>
      <edge id="29886" label="0100011001 (1) 0101011001" source="27197" target="27133" cy:directed="1"/>
      <edge id="29885" label="0100011001 (1) 0000011001" source="27197" target="27217" cy:directed="1"/>
      <edge id="29884" label="0101010001 (1) 0101010011" source="27196" target="27135" cy:directed="1"/>
      <edge id="29883" label="0101010001 (1) 0101010101" source="27196" target="27134" cy:directed="1"/>
      <edge id="29882" label="0101010001 (1) 0101011001" source="27196" target="27133" cy:directed="1"/>
      <edge id="29881" label="0101010001 (1) 0101000001" source="27196" target="27370" cy:directed="1"/>
      <edge id="29880" label="0101010001 (1) 0101110001" source="27196" target="27201" cy:directed="1"/>
      <edge id="29879" label="0101010001 (1) 0001010001" source="27196" target="27216" cy:directed="1"/>
      <edge id="29878" label="1000011110 (1) 1000010110" source="27195" target="27432" cy:directed="1"/>
      <edge id="29877" label="1000011110 (1) 1000001110" source="27195" target="27358" cy:directed="1"/>
      <edge id="29876" label="1000011110 (1) 1001011110" source="27195" target="27109" cy:directed="1"/>
      <edge id="29875" label="1000011110 (1) 1010011110" source="27195" target="27160" cy:directed="1"/>
      <edge id="29874" label="1101101010 (1) 1101101000" source="27194" target="27559" cy:directed="1"/>
      <edge id="29873" label="1101101010 (1) 1101100010" source="27194" target="27445" cy:directed="1"/>
      <edge id="29872" label="1101101010 (1) 1101111010" source="27194" target="27051" cy:directed="1"/>
      <edge id="29871" label="1011101100 (1) 1011101000" source="27193" target="27484" cy:directed="1"/>
      <edge id="29870" label="1011101100 (1) 1011100100" source="27193" target="27480" cy:directed="1"/>
      <edge id="29869" label="1011101100 (1) 1011111100" source="27193" target="27306" cy:directed="1"/>
      <edge id="29868" label="1011101100 (1) 1011001100" source="27193" target="27290" cy:directed="1"/>
      <edge id="29867" label="1011101100 (1) 1010101100" source="27193" target="27240" cy:directed="1"/>
      <edge id="29866" label="1011101100 (1) 1111101100" source="27193" target="27249" cy:directed="1"/>
      <edge id="29865" label="1010010001 (1) 1010010011" source="27192" target="27191" cy:directed="1"/>
      <edge id="29864" label="1010010001 (1) 1010010101" source="27192" target="27190" cy:directed="1"/>
      <edge id="29863" label="1010010001 (1) 1010011001" source="27192" target="27189" cy:directed="1"/>
      <edge id="29862" label="1010010001 (1) 1010000001" source="27192" target="27348" cy:directed="1"/>
      <edge id="29861" label="1010010001 (1) 1000010001" source="27192" target="27225" cy:directed="1"/>
      <edge id="29860" label="1010010011 (1) 1010010111" source="27191" target="26877" cy:directed="1"/>
      <edge id="29859" label="1010010011 (1) 1010000011" source="27191" target="27347" cy:directed="1"/>
      <edge id="29858" label="1010010011 (1) 1000010011" source="27191" target="27224" cy:directed="1"/>
      <edge id="29857" label="1010010101 (1) 1010010111" source="27190" target="26877" cy:directed="1"/>
      <edge id="29856" label="1010010101 (1) 1010011101" source="27190" target="26920" cy:directed="1"/>
      <edge id="29855" label="1010010101 (1) 1010000101" source="27190" target="27346" cy:directed="1"/>
      <edge id="29854" label="1010010101 (1) 1010110101" source="27190" target="27050" cy:directed="1"/>
      <edge id="29853" label="1010011001 (1) 1010011011" source="27189" target="26921" cy:directed="1"/>
      <edge id="29852" label="1010011001 (1) 1010011101" source="27189" target="26920" cy:directed="1"/>
      <edge id="29851" label="1010011001 (1) 1010001001" source="27189" target="27083" cy:directed="1"/>
      <edge id="29850" label="1010011001 (1) 1000011001" source="27189" target="27222" cy:directed="1"/>
      <edge id="29849" label="0000011110 (1) 0000010110" source="27188" target="27436" cy:directed="1"/>
      <edge id="29848" label="0000011110 (1) 0000001110" source="27188" target="27353" cy:directed="1"/>
      <edge id="29847" label="0000011110 (1) 0001011110" source="27188" target="27108" cy:directed="1"/>
      <edge id="29846" label="0000011110 (1) 0010011110" source="27188" target="27161" cy:directed="1"/>
      <edge id="29845" label="0101101010 (1) 0101101000" source="27187" target="27556" cy:directed="1"/>
      <edge id="29844" label="0101101010 (1) 0101100010" source="27187" target="27441" cy:directed="1"/>
      <edge id="29843" label="0101101010 (1) 0101111010" source="27187" target="27040" cy:directed="1"/>
      <edge id="29842" label="0101101010 (1) 0001101010" source="27187" target="27145" cy:directed="1"/>
      <edge id="29841" label="1011100101 (1) 1011110101" source="27186" target="26974" cy:directed="1"/>
      <edge id="29840" label="1011100101 (1) 1010100101" source="27186" target="27236" cy:directed="1"/>
      <edge id="29839" label="1011100101 (1) 1111100101" source="27186" target="27175" cy:directed="1"/>
      <edge id="29838" label="1011110001 (1) 1011110101" source="27185" target="26974" cy:directed="1"/>
      <edge id="29837" label="1011110001 (1) 1011111001" source="27185" target="26973" cy:directed="1"/>
      <edge id="29836" label="1011110001 (1) 1011010001" source="27185" target="27107" cy:directed="1"/>
      <edge id="29835" label="1011110001 (1) 1010110001" source="27185" target="27235" cy:directed="1"/>
      <edge id="29834" label="0011101100 (1) 0011101000" source="27184" target="27485" cy:directed="1"/>
      <edge id="29833" label="0011101100 (1) 0011100100" source="27184" target="27477" cy:directed="1"/>
      <edge id="29832" label="0011101100 (1) 0011111100" source="27184" target="27309" cy:directed="1"/>
      <edge id="29831" label="0011101100 (1) 0011001100" source="27184" target="27288" cy:directed="1"/>
      <edge id="29830" label="0011101100 (1) 0010101100" source="27184" target="27243" cy:directed="1"/>
      <edge id="29829" label="0010010001 (1) 0010010011" source="27183" target="27182" cy:directed="1"/>
      <edge id="29828" label="0010010001 (1) 0010010101" source="27183" target="27181" cy:directed="1"/>
      <edge id="29827" label="0010010001 (1) 0010011001" source="27183" target="27180" cy:directed="1"/>
      <edge id="29826" label="0010010001 (1) 0010000001" source="27183" target="27344" cy:directed="1"/>
      <edge id="29825" label="0010010001 (1) 0000010001" source="27183" target="27220" cy:directed="1"/>
      <edge id="29824" label="0010010011 (1) 0010010111" source="27182" target="26871" cy:directed="1"/>
      <edge id="29823" label="0010010011 (1) 0010000011" source="27182" target="27343" cy:directed="1"/>
      <edge id="29822" label="0010010011 (1) 0000010011" source="27182" target="27219" cy:directed="1"/>
      <edge id="29821" label="0010010101 (1) 0010010111" source="27181" target="26871" cy:directed="1"/>
      <edge id="29820" label="0010010101 (1) 0010011101" source="27181" target="26917" cy:directed="1"/>
      <edge id="29819" label="0010010101 (1) 0010000101" source="27181" target="27342" cy:directed="1"/>
      <edge id="29818" label="0010010101 (1) 0010110101" source="27181" target="27047" cy:directed="1"/>
      <edge id="29817" label="0010011001 (1) 0010011011" source="27180" target="26918" cy:directed="1"/>
      <edge id="29816" label="0010011001 (1) 0010011101" source="27180" target="26917" cy:directed="1"/>
      <edge id="29815" label="0010011001 (1) 0010001001" source="27180" target="27079" cy:directed="1"/>
      <edge id="29814" label="0010011001 (1) 0000011001" source="27180" target="27217" cy:directed="1"/>
      <edge id="29813" label="0011100101 (1) 0011110101" source="27179" target="26971" cy:directed="1"/>
      <edge id="29812" label="0011100101 (1) 0010100101" source="27179" target="27238" cy:directed="1"/>
      <edge id="29811" label="0011110001 (1) 0011110101" source="27178" target="26971" cy:directed="1"/>
      <edge id="29810" label="0011110001 (1) 0011111001" source="27178" target="26970" cy:directed="1"/>
      <edge id="29809" label="0011110001 (1) 0011010001" source="27178" target="27103" cy:directed="1"/>
      <edge id="29808" label="0011110001 (1) 0010110001" source="27178" target="27237" cy:directed="1"/>
      <edge id="29807" label="1100011110 (1) 1100010110" source="27177" target="27419" cy:directed="1"/>
      <edge id="29806" label="1100011110 (1) 1100001110" source="27177" target="27340" cy:directed="1"/>
      <edge id="29805" label="1100011110 (1) 1101011110" source="27177" target="27099" cy:directed="1"/>
      <edge id="29804" label="1100011110 (1) 1000011110" source="27177" target="27195" cy:directed="1"/>
      <edge id="29803" label="0100011110 (1) 0100010110" source="27176" target="27422" cy:directed="1"/>
      <edge id="29802" label="0100011110 (1) 0100001110" source="27176" target="27336" cy:directed="1"/>
      <edge id="29801" label="0100011110 (1) 0101011110" source="27176" target="27097" cy:directed="1"/>
      <edge id="29800" label="0100011110 (1) 0000011110" source="27176" target="27188" cy:directed="1"/>
      <edge id="29799" label="1111100101 (1) 1111110101" source="27175" target="26969" cy:directed="1"/>
      <edge id="29798" label="1111100101 (1) 1110100101" source="27175" target="27230" cy:directed="1"/>
      <edge id="29797" label="1111110001 (1) 1111110101" source="27174" target="26969" cy:directed="1"/>
      <edge id="29796" label="1111110001 (1) 1111111001" source="27174" target="26968" cy:directed="1"/>
      <edge id="29795" label="1111110001 (1) 1110110001" source="27174" target="27229" cy:directed="1"/>
      <edge id="29794" label="1111110001 (1) 1101110001" source="27174" target="27208" cy:directed="1"/>
      <edge id="29793" label="1111110001 (1) 1011110001" source="27174" target="27185" cy:directed="1"/>
      <edge id="29792" label="1110010001 (1) 1110010011" source="27173" target="27172" cy:directed="1"/>
      <edge id="29791" label="1110010001 (1) 1110010101" source="27173" target="27171" cy:directed="1"/>
      <edge id="29790" label="1110010001 (1) 1110011001" source="27173" target="27170" cy:directed="1"/>
      <edge id="29789" label="1110010001 (1) 1110000001" source="27173" target="27345" cy:directed="1"/>
      <edge id="29788" label="1110010001 (1) 1100010001" source="27173" target="27207" cy:directed="1"/>
      <edge id="29787" label="1110010001 (1) 1010010001" source="27173" target="27192" cy:directed="1"/>
      <edge id="29786" label="1110010011 (1) 1110010111" source="27172" target="26869" cy:directed="1"/>
      <edge id="29785" label="1110010011 (1) 1110000011" source="27172" target="27334" cy:directed="1"/>
      <edge id="29784" label="1110010011 (1) 1100010011" source="27172" target="27206" cy:directed="1"/>
      <edge id="29783" label="1110010011 (1) 1010010011" source="27172" target="27191" cy:directed="1"/>
      <edge id="29782" label="1110010101 (1) 1110010111" source="27171" target="26869" cy:directed="1"/>
      <edge id="29781" label="1110010101 (1) 1110011101" source="27171" target="26914" cy:directed="1"/>
      <edge id="29780" label="1110010101 (1) 1110000101" source="27171" target="27333" cy:directed="1"/>
      <edge id="29779" label="1110010101 (1) 1110110101" source="27171" target="27034" cy:directed="1"/>
      <edge id="29778" label="1110010101 (1) 1100010101" source="27171" target="27205" cy:directed="1"/>
      <edge id="29777" label="1110010101 (1) 1010010101" source="27171" target="27190" cy:directed="1"/>
      <edge id="29776" label="1110011001 (1) 1110011011" source="27170" target="26915" cy:directed="1"/>
      <edge id="29775" label="1110011001 (1) 1110011101" source="27170" target="26914" cy:directed="1"/>
      <edge id="29774" label="1110011001 (1) 1110001001" source="27170" target="27080" cy:directed="1"/>
      <edge id="29773" label="1110011001 (1) 1100011001" source="27170" target="27204" cy:directed="1"/>
      <edge id="29772" label="1110011001 (1) 1010011001" source="27170" target="27189" cy:directed="1"/>
      <edge id="29771" label="0111100101 (1) 0111110101" source="27169" target="26967" cy:directed="1"/>
      <edge id="29770" label="0111100101 (1) 0110100101" source="27169" target="27227" cy:directed="1"/>
      <edge id="29769" label="0111100101 (1) 0011100101" source="27169" target="27179" cy:directed="1"/>
      <edge id="29768" label="0111110001 (1) 0111110101" source="27168" target="26967" cy:directed="1"/>
      <edge id="29767" label="0111110001 (1) 0111111001" source="27168" target="26966" cy:directed="1"/>
      <edge id="29766" label="0111110001 (1) 0110110001" source="27168" target="27226" cy:directed="1"/>
      <edge id="29765" label="0111110001 (1) 0101110001" source="27168" target="27201" cy:directed="1"/>
      <edge id="29764" label="0111110001 (1) 0011110001" source="27168" target="27178" cy:directed="1"/>
      <edge id="29763" label="0110010001 (1) 0110010011" source="27167" target="27166" cy:directed="1"/>
      <edge id="29762" label="0110010001 (1) 0110010101" source="27167" target="27165" cy:directed="1"/>
      <edge id="29761" label="0110010001 (1) 0110011001" source="27167" target="27164" cy:directed="1"/>
      <edge id="29760" label="0110010001 (1) 0110000001" source="27167" target="27332" cy:directed="1"/>
      <edge id="29759" label="0110010001 (1) 0100010001" source="27167" target="27200" cy:directed="1"/>
      <edge id="29758" label="0110010001 (1) 0010010001" source="27167" target="27183" cy:directed="1"/>
      <edge id="29757" label="0110010011 (1) 0110010111" source="27166" target="26868" cy:directed="1"/>
      <edge id="29756" label="0110010011 (1) 0110000011" source="27166" target="27331" cy:directed="1"/>
      <edge id="29755" label="0110010011 (1) 0100010011" source="27166" target="27199" cy:directed="1"/>
      <edge id="29754" label="0110010011 (1) 0010010011" source="27166" target="27182" cy:directed="1"/>
      <edge id="29753" label="0110010101 (1) 0110010111" source="27165" target="26868" cy:directed="1"/>
      <edge id="29752" label="0110010101 (1) 0110011101" source="27165" target="26911" cy:directed="1"/>
      <edge id="29751" label="0110010101 (1) 0110000101" source="27165" target="27330" cy:directed="1"/>
      <edge id="29750" label="0110010101 (1) 0110110101" source="27165" target="27029" cy:directed="1"/>
      <edge id="29749" label="0110010101 (1) 0100010101" source="27165" target="27198" cy:directed="1"/>
      <edge id="29748" label="0110010101 (1) 0010010101" source="27165" target="27181" cy:directed="1"/>
      <edge id="29747" label="0110011001 (1) 0110011011" source="27164" target="26912" cy:directed="1"/>
      <edge id="29746" label="0110011001 (1) 0110011101" source="27164" target="26911" cy:directed="1"/>
      <edge id="29745" label="0110011001 (1) 0110001001" source="27164" target="27070" cy:directed="1"/>
      <edge id="29744" label="0110011001 (1) 0100011001" source="27164" target="27197" cy:directed="1"/>
      <edge id="29743" label="0110011001 (1) 0010011001" source="27164" target="27180" cy:directed="1"/>
      <edge id="29742" label="1000100110 (1) 1000100100" source="27163" target="27553" cy:directed="1"/>
      <edge id="29741" label="1000100110 (1) 1000100010" source="27163" target="27401" cy:directed="1"/>
      <edge id="29740" label="1000100110 (1) 1000110110" source="27163" target="27027" cy:directed="1"/>
      <edge id="29739" label="1000100110 (1) 1001100110" source="27163" target="27076" cy:directed="1"/>
      <edge id="29738" label="1000100110 (1) 1010100110" source="27163" target="27132" cy:directed="1"/>
      <edge id="29737" label="1000100110 (1) 1100100110" source="27163" target="27158" cy:directed="1"/>
      <edge id="29736" label="0000100110 (1) 0000100100" source="27162" target="27544" cy:directed="1"/>
      <edge id="29735" label="0000100110 (1) 0000100010" source="27162" target="27396" cy:directed="1"/>
      <edge id="29734" label="0000100110 (1) 0000110110" source="27162" target="27026" cy:directed="1"/>
      <edge id="29733" label="0000100110 (1) 0001100110" source="27162" target="27075" cy:directed="1"/>
      <edge id="29732" label="0000100110 (1) 0010100110" source="27162" target="27130" cy:directed="1"/>
      <edge id="29731" label="0010011110 (1) 0010010110" source="27161" target="27409" cy:directed="1"/>
      <edge id="29730" label="0010011110 (1) 0010001110" source="27161" target="27317" cy:directed="1"/>
      <edge id="29729" label="1010011110 (1) 1010010110" source="27160" target="27408" cy:directed="1"/>
      <edge id="29728" label="1010011110 (1) 1010001110" source="27160" target="27321" cy:directed="1"/>
      <edge id="29727" label="0111101010 (1) 0111101000" source="27159" target="27526" cy:directed="1"/>
      <edge id="29726" label="0111101010 (1) 0111100010" source="27159" target="27410" cy:directed="1"/>
      <edge id="29725" label="0111101010 (1) 0111111010" source="27159" target="27020" cy:directed="1"/>
      <edge id="29724" label="0111101010 (1) 0110101010" source="27159" target="27085" cy:directed="1"/>
      <edge id="29723" label="0111101010 (1) 0101101010" source="27159" target="27187" cy:directed="1"/>
      <edge id="29722" label="0111101010 (1) 0011101010" source="27159" target="27054" cy:directed="1"/>
      <edge id="29721" label="1100100110 (1) 1100100100" source="27158" target="27537" cy:directed="1"/>
      <edge id="29720" label="1100100110 (1) 1100100010" source="27158" target="27397" cy:directed="1"/>
      <edge id="29719" label="1100100110 (1) 1100110110" source="27158" target="27023" cy:directed="1"/>
      <edge id="29718" label="1100100110 (1) 1101100110" source="27158" target="27064" cy:directed="1"/>
      <edge id="29717" label="1100100110 (1) 1110100110" source="27158" target="27118" cy:directed="1"/>
      <edge id="29716" label="1111101010 (1) 1111101000" source="27157" target="27534" cy:directed="1"/>
      <edge id="29715" label="1111101010 (1) 1111100010" source="27157" target="27415" cy:directed="1"/>
      <edge id="29714" label="1111101010 (1) 1111111010" source="27157" target="27022" cy:directed="1"/>
      <edge id="29713" label="1111101010 (1) 1110101010" source="27157" target="27095" cy:directed="1"/>
      <edge id="29712" label="1111101010 (1) 1101101010" source="27157" target="27194" cy:directed="1"/>
      <edge id="29711" label="0100100110 (1) 0100100100" source="27156" target="27530" cy:directed="1"/>
      <edge id="29710" label="0100100110 (1) 0100100010" source="27156" target="27389" cy:directed="1"/>
      <edge id="29709" label="0100100110 (1) 0100110110" source="27156" target="27014" cy:directed="1"/>
      <edge id="29708" label="0100100110 (1) 0101100110" source="27156" target="27062" cy:directed="1"/>
      <edge id="29707" label="0100100110 (1) 0110100110" source="27156" target="27117" cy:directed="1"/>
      <edge id="29706" label="0100100110 (1) 0000100110" source="27156" target="27162" cy:directed="1"/>
      <edge id="29705" label="1110011110 (1) 1110010110" source="27155" target="27402" cy:directed="1"/>
      <edge id="29704" label="1110011110 (1) 1110001110" source="27155" target="27305" cy:directed="1"/>
      <edge id="29703" label="1110011110 (1) 1100011110" source="27155" target="27177" cy:directed="1"/>
      <edge id="29702" label="1110011110 (1) 1010011110" source="27155" target="27160" cy:directed="1"/>
      <edge id="29701" label="0110011110 (1) 0110010110" source="27154" target="27404" cy:directed="1"/>
      <edge id="29700" label="0110011110 (1) 0110001110" source="27154" target="27313" cy:directed="1"/>
      <edge id="29699" label="0110011110 (1) 0100011110" source="27154" target="27176" cy:directed="1"/>
      <edge id="29698" label="0110011110 (1) 0010011110" source="27154" target="27161" cy:directed="1"/>
      <edge id="29697" label="1001010011 (1) 1001010111" source="27153" target="26845" cy:directed="1"/>
      <edge id="29696" label="1001010011 (1) 1001000011" source="27153" target="27308" cy:directed="1"/>
      <edge id="29695" label="1001010101 (1) 1001010111" source="27152" target="26845" cy:directed="1"/>
      <edge id="29694" label="1001010101 (1) 1001011101" source="27152" target="26904" cy:directed="1"/>
      <edge id="29693" label="1001010101 (1) 1001000101" source="27152" target="27307" cy:directed="1"/>
      <edge id="29692" label="1001010101 (1) 1001110101" source="27152" target="27009" cy:directed="1"/>
      <edge id="29691" label="1001010101 (1) 1011010101" source="27152" target="27105" cy:directed="1"/>
      <edge id="29690" label="1001011001 (1) 1001011011" source="27151" target="26905" cy:directed="1"/>
      <edge id="29689" label="1001011001 (1) 1001011101" source="27151" target="26904" cy:directed="1"/>
      <edge id="29688" label="1001011001 (1) 1001001001" source="27151" target="27124" cy:directed="1"/>
      <edge id="29687" label="0001010011 (1) 0001010111" source="27150" target="26844" cy:directed="1"/>
      <edge id="29686" label="0001010011 (1) 0001000011" source="27150" target="27312" cy:directed="1"/>
      <edge id="29685" label="0001010101 (1) 0001010111" source="27149" target="26844" cy:directed="1"/>
      <edge id="29684" label="0001010101 (1) 0001011101" source="27149" target="26902" cy:directed="1"/>
      <edge id="29683" label="0001010101 (1) 0001000101" source="27149" target="27311" cy:directed="1"/>
      <edge id="29682" label="0001010101 (1) 0001110101" source="27149" target="27003" cy:directed="1"/>
      <edge id="29681" label="0001010101 (1) 0011010101" source="27149" target="27101" cy:directed="1"/>
      <edge id="29680" label="0001011001 (1) 0001011011" source="27148" target="26903" cy:directed="1"/>
      <edge id="29679" label="0001011001 (1) 0001011101" source="27148" target="26902" cy:directed="1"/>
      <edge id="29678" label="0001011001 (1) 0001001001" source="27148" target="27119" cy:directed="1"/>
      <edge id="29677" label="0000101010 (1) 0000101000" source="27147" target="27523" cy:directed="1"/>
      <edge id="29676" label="0000101010 (1) 0000100010" source="27147" target="27396" cy:directed="1"/>
      <edge id="29675" label="0000101010 (1) 0000111010" source="27147" target="27146" cy:directed="1"/>
      <edge id="29674" label="0000101010 (1) 0000001010" source="27147" target="27596" cy:directed="1"/>
      <edge id="29673" label="0000101010 (1) 0001101010" source="27147" target="27145" cy:directed="1"/>
      <edge id="29672" label="0000101010 (1) 0010101010" source="27147" target="27144" cy:directed="1"/>
      <edge id="29671" label="0000111010 (1) 0000111000" source="27146" target="27570" cy:directed="1"/>
      <edge id="29670" label="0000111010 (1) 0000111110" source="27146" target="26950" cy:directed="1"/>
      <edge id="29669" label="0000111010 (1) 0000110010" source="27146" target="27395" cy:directed="1"/>
      <edge id="29668" label="0000111010 (1) 0000011010" source="27146" target="27487" cy:directed="1"/>
      <edge id="29667" label="0000111010 (1) 0001111010" source="27146" target="27055" cy:directed="1"/>
      <edge id="29666" label="0000111010 (1) 0010111010" source="27146" target="27098" cy:directed="1"/>
      <edge id="29665" label="0001101010 (1) 0001101000" source="27145" target="27522" cy:directed="1"/>
      <edge id="29664" label="0001101010 (1) 0001100010" source="27145" target="27394" cy:directed="1"/>
      <edge id="29663" label="0001101010 (1) 0001111010" source="27145" target="27055" cy:directed="1"/>
      <edge id="29662" label="0001101010 (1) 0001001010" source="27145" target="27562" cy:directed="1"/>
      <edge id="29661" label="0001101010 (1) 0011101010" source="27145" target="27054" cy:directed="1"/>
      <edge id="29660" label="0010101010 (1) 0010101000" source="27144" target="27521" cy:directed="1"/>
      <edge id="29659" label="0010101010 (1) 0010100010" source="27144" target="27393" cy:directed="1"/>
      <edge id="29658" label="0010101010 (1) 0010111010" source="27144" target="27098" cy:directed="1"/>
      <edge id="29657" label="0010101010 (1) 0010001010" source="27144" target="27573" cy:directed="1"/>
      <edge id="29656" label="1000101010 (1) 1000101000" source="27143" target="27520" cy:directed="1"/>
      <edge id="29655" label="1000101010 (1) 1000100010" source="27143" target="27401" cy:directed="1"/>
      <edge id="29654" label="1000101010 (1) 1000111010" source="27143" target="27142" cy:directed="1"/>
      <edge id="29653" label="1000101010 (1) 1000001010" source="27143" target="27600" cy:directed="1"/>
      <edge id="29652" label="1000101010 (1) 1001101010" source="27143" target="27141" cy:directed="1"/>
      <edge id="29651" label="1000101010 (1) 1010101010" source="27143" target="27140" cy:directed="1"/>
      <edge id="29650" label="1000101010 (1) 1100101010" source="27143" target="27139" cy:directed="1"/>
      <edge id="29649" label="1000111010 (1) 1000111000" source="27142" target="27572" cy:directed="1"/>
      <edge id="29648" label="1000111010 (1) 1000111110" source="27142" target="26951" cy:directed="1"/>
      <edge id="29647" label="1000111010 (1) 1000110010" source="27142" target="27400" cy:directed="1"/>
      <edge id="29646" label="1000111010 (1) 1000011010" source="27142" target="27489" cy:directed="1"/>
      <edge id="29645" label="1000111010 (1) 1001111010" source="27142" target="27053" cy:directed="1"/>
      <edge id="29644" label="1000111010 (1) 1010111010" source="27142" target="27096" cy:directed="1"/>
      <edge id="29643" label="1001101010 (1) 1001101000" source="27141" target="27519" cy:directed="1"/>
      <edge id="29642" label="1001101010 (1) 1001100010" source="27141" target="27399" cy:directed="1"/>
      <edge id="29641" label="1001101010 (1) 1001111010" source="27141" target="27053" cy:directed="1"/>
      <edge id="29640" label="1001101010 (1) 1001001010" source="27141" target="27564" cy:directed="1"/>
      <edge id="29639" label="1001101010 (1) 1011101010" source="27141" target="27052" cy:directed="1"/>
      <edge id="29638" label="1001101010 (1) 1101101010" source="27141" target="27194" cy:directed="1"/>
      <edge id="29637" label="1010101010 (1) 1010101000" source="27140" target="27518" cy:directed="1"/>
      <edge id="29636" label="1010101010 (1) 1010100010" source="27140" target="27398" cy:directed="1"/>
      <edge id="29635" label="1010101010 (1) 1010111010" source="27140" target="27096" cy:directed="1"/>
      <edge id="29634" label="1010101010 (1) 1010001010" source="27140" target="27576" cy:directed="1"/>
      <edge id="29633" label="1010101010 (1) 1110101010" source="27140" target="27095" cy:directed="1"/>
      <edge id="29632" label="1100101010 (1) 1100101000" source="27139" target="27517" cy:directed="1"/>
      <edge id="29631" label="1100101010 (1) 1100100010" source="27139" target="27397" cy:directed="1"/>
      <edge id="29630" label="1100101010 (1) 1100111010" source="27139" target="27131" cy:directed="1"/>
      <edge id="29629" label="1100101010 (1) 1100001010" source="27139" target="27594" cy:directed="1"/>
      <edge id="29628" label="1100101010 (1) 1101101010" source="27139" target="27194" cy:directed="1"/>
      <edge id="29627" label="1101010011 (1) 1101010111" source="27138" target="26836" cy:directed="1"/>
      <edge id="29626" label="1101010011 (1) 1101000011" source="27138" target="27301" cy:directed="1"/>
      <edge id="29625" label="1101010011 (1) 1101110011" source="27138" target="26797" cy:directed="1"/>
      <edge id="29624" label="1101010011 (1) 1001010011" source="27138" target="27153" cy:directed="1"/>
      <edge id="29623" label="1101010101 (1) 1101010111" source="27137" target="26836" cy:directed="1"/>
      <edge id="29622" label="1101010101 (1) 1101011101" source="27137" target="26900" cy:directed="1"/>
      <edge id="29621" label="1101010101 (1) 1101000101" source="27137" target="27300" cy:directed="1"/>
      <edge id="29620" label="1101010101 (1) 1101110101" source="27137" target="26997" cy:directed="1"/>
      <edge id="29619" label="1101010101 (1) 1001010101" source="27137" target="27152" cy:directed="1"/>
      <edge id="29618" label="1101011001 (1) 1101011011" source="27136" target="26901" cy:directed="1"/>
      <edge id="29617" label="1101011001 (1) 1101011101" source="27136" target="26900" cy:directed="1"/>
      <edge id="29616" label="1101011001 (1) 1101001001" source="27136" target="27114" cy:directed="1"/>
      <edge id="29615" label="1101011001 (1) 1101111001" source="27136" target="26996" cy:directed="1"/>
      <edge id="29614" label="1101011001 (1) 1001011001" source="27136" target="27151" cy:directed="1"/>
      <edge id="29613" label="0101010011 (1) 0101010111" source="27135" target="26833" cy:directed="1"/>
      <edge id="29612" label="0101010011 (1) 0101000011" source="27135" target="27298" cy:directed="1"/>
      <edge id="29611" label="0101010011 (1) 0101110011" source="27135" target="26794" cy:directed="1"/>
      <edge id="29610" label="0101010011 (1) 0001010011" source="27135" target="27150" cy:directed="1"/>
      <edge id="29609" label="0101010101 (1) 0101010111" source="27134" target="26833" cy:directed="1"/>
      <edge id="29608" label="0101010101 (1) 0101011101" source="27134" target="26898" cy:directed="1"/>
      <edge id="29607" label="0101010101 (1) 0101000101" source="27134" target="27297" cy:directed="1"/>
      <edge id="29606" label="0101010101 (1) 0101110101" source="27134" target="26995" cy:directed="1"/>
      <edge id="29605" label="0101010101 (1) 0001010101" source="27134" target="27149" cy:directed="1"/>
      <edge id="29604" label="0101011001 (1) 0101011011" source="27133" target="26899" cy:directed="1"/>
      <edge id="29603" label="0101011001 (1) 0101011101" source="27133" target="26898" cy:directed="1"/>
      <edge id="29602" label="0101011001 (1) 0101001001" source="27133" target="27110" cy:directed="1"/>
      <edge id="29601" label="0101011001 (1) 0101111001" source="27133" target="26994" cy:directed="1"/>
      <edge id="29600" label="0101011001 (1) 0001011001" source="27133" target="27148" cy:directed="1"/>
      <edge id="29599" label="1010100110 (1) 1010100100" source="27132" target="27515" cy:directed="1"/>
      <edge id="29598" label="1010100110 (1) 1010100010" source="27132" target="27398" cy:directed="1"/>
      <edge id="29597" label="1010100110 (1) 1010110110" source="27132" target="26993" cy:directed="1"/>
      <edge id="29596" label="1010100110 (1) 1110100110" source="27132" target="27118" cy:directed="1"/>
      <edge id="29595" label="1100111010 (1) 1100111000" source="27131" target="27567" cy:directed="1"/>
      <edge id="29594" label="1100111010 (1) 1100111110" source="27131" target="26948" cy:directed="1"/>
      <edge id="29593" label="1100111010 (1) 1100110010" source="27131" target="27391" cy:directed="1"/>
      <edge id="29592" label="1100111010 (1) 1100011010" source="27131" target="27483" cy:directed="1"/>
      <edge id="29591" label="1100111010 (1) 1101111010" source="27131" target="27051" cy:directed="1"/>
      <edge id="29590" label="1100111010 (1) 1000111010" source="27131" target="27142" cy:directed="1"/>
      <edge id="29589" label="0010100110 (1) 0010100100" source="27130" target="27512" cy:directed="1"/>
      <edge id="29588" label="0010100110 (1) 0010100010" source="27130" target="27393" cy:directed="1"/>
      <edge id="29587" label="0010100110 (1) 0010110110" source="27130" target="26992" cy:directed="1"/>
      <edge id="29586" label="0100101010 (1) 0100101000" source="27129" target="27511" cy:directed="1"/>
      <edge id="29585" label="0100101010 (1) 0100100010" source="27129" target="27389" cy:directed="1"/>
      <edge id="29584" label="0100101010 (1) 0100111010" source="27129" target="27128" cy:directed="1"/>
      <edge id="29583" label="0100101010 (1) 0100001010" source="27129" target="27591" cy:directed="1"/>
      <edge id="29582" label="0100101010 (1) 0101101010" source="27129" target="27187" cy:directed="1"/>
      <edge id="29581" label="0100101010 (1) 0000101010" source="27129" target="27147" cy:directed="1"/>
      <edge id="29580" label="0100111010 (1) 0100111000" source="27128" target="27566" cy:directed="1"/>
      <edge id="29579" label="0100111010 (1) 0100111110" source="27128" target="26946" cy:directed="1"/>
      <edge id="29578" label="0100111010 (1) 0100110010" source="27128" target="27388" cy:directed="1"/>
      <edge id="29577" label="0100111010 (1) 0100011010" source="27128" target="27476" cy:directed="1"/>
      <edge id="29576" label="0100111010 (1) 0101111010" source="27128" target="27040" cy:directed="1"/>
      <edge id="29575" label="0100111010 (1) 0000111010" source="27128" target="27146" cy:directed="1"/>
      <edge id="29574" label="1000001001 (1) 1000001011" source="27127" target="27126" cy:directed="1"/>
      <edge id="29573" label="1000001001 (1) 1000001101" source="27127" target="27125" cy:directed="1"/>
      <edge id="29572" label="1000001001 (1) 1000000001" source="27127" target="27383" cy:directed="1"/>
      <edge id="29571" label="1000001001 (1) 1001001001" source="27127" target="27124" cy:directed="1"/>
      <edge id="29570" label="1000001001 (1) 1100001001" source="27127" target="27123" cy:directed="1"/>
      <edge id="29569" label="1000001011 (1) 1000001111" source="27126" target="26825" cy:directed="1"/>
      <edge id="29568" label="1000001011 (1) 1000000011" source="27126" target="27382" cy:directed="1"/>
      <edge id="29567" label="1000001011 (1) 1001001011" source="27126" target="27045" cy:directed="1"/>
      <edge id="29566" label="1000001011 (1) 1100001011" source="27126" target="27116" cy:directed="1"/>
      <edge id="29565" label="1000001101 (1) 1000001111" source="27125" target="26825" cy:directed="1"/>
      <edge id="29564" label="1000001101 (1) 1000000101" source="27125" target="27381" cy:directed="1"/>
      <edge id="29563" label="1000001101 (1) 1001001101" source="27125" target="27044" cy:directed="1"/>
      <edge id="29562" label="1000001101 (1) 1010001101" source="27125" target="27081" cy:directed="1"/>
      <edge id="29561" label="1000001101 (1) 1100001101" source="27125" target="27115" cy:directed="1"/>
      <edge id="29560" label="1001001001 (1) 1001001011" source="27124" target="27045" cy:directed="1"/>
      <edge id="29559" label="1001001001 (1) 1001001101" source="27124" target="27044" cy:directed="1"/>
      <edge id="29558" label="1001001001 (1) 1001000001" source="27124" target="27380" cy:directed="1"/>
      <edge id="29557" label="1001001001 (1) 1101001001" source="27124" target="27114" cy:directed="1"/>
      <edge id="29556" label="1100001001 (1) 1100001011" source="27123" target="27116" cy:directed="1"/>
      <edge id="29555" label="1100001001 (1) 1100001101" source="27123" target="27115" cy:directed="1"/>
      <edge id="29554" label="1100001001 (1) 1100000001" source="27123" target="27379" cy:directed="1"/>
      <edge id="29553" label="1100001001 (1) 1101001001" source="27123" target="27114" cy:directed="1"/>
      <edge id="29552" label="0000001001 (1) 0000001011" source="27122" target="27121" cy:directed="1"/>
      <edge id="29551" label="0000001001 (1) 0000001101" source="27122" target="27120" cy:directed="1"/>
      <edge id="29550" label="0000001001 (1) 0000000001" source="27122" target="27387" cy:directed="1"/>
      <edge id="29549" label="0000001001 (1) 0001001001" source="27122" target="27119" cy:directed="1"/>
      <edge id="29548" label="0000001011 (1) 0000001111" source="27121" target="26826" cy:directed="1"/>
      <edge id="29547" label="0000001011 (1) 0000000011" source="27121" target="27386" cy:directed="1"/>
      <edge id="29546" label="0000001011 (1) 0001001011" source="27121" target="27042" cy:directed="1"/>
      <edge id="29545" label="0000001101 (1) 0000001111" source="27120" target="26826" cy:directed="1"/>
      <edge id="29544" label="0000001101 (1) 0000000101" source="27120" target="27385" cy:directed="1"/>
      <edge id="29543" label="0000001101 (1) 0001001101" source="27120" target="27041" cy:directed="1"/>
      <edge id="29542" label="0000001101 (1) 0010001101" source="27120" target="27077" cy:directed="1"/>
      <edge id="29541" label="0001001001 (1) 0001001011" source="27119" target="27042" cy:directed="1"/>
      <edge id="29540" label="0001001001 (1) 0001001101" source="27119" target="27041" cy:directed="1"/>
      <edge id="29539" label="0001001001 (1) 0001000001" source="27119" target="27384" cy:directed="1"/>
      <edge id="29538" label="1110100110 (1) 1110100100" source="27118" target="27508" cy:directed="1"/>
      <edge id="29537" label="1110100110 (1) 1110100010" source="27118" target="27364" cy:directed="1"/>
      <edge id="29536" label="1110100110 (1) 1110110110" source="27118" target="26982" cy:directed="1"/>
      <edge id="29535" label="0110100110 (1) 0110100100" source="27117" target="27504" cy:directed="1"/>
      <edge id="29534" label="0110100110 (1) 0110100010" source="27117" target="27350" cy:directed="1"/>
      <edge id="29533" label="0110100110 (1) 0110110110" source="27117" target="26981" cy:directed="1"/>
      <edge id="29532" label="0110100110 (1) 0010100110" source="27117" target="27130" cy:directed="1"/>
      <edge id="29531" label="1100001011 (1) 1100001111" source="27116" target="26819" cy:directed="1"/>
      <edge id="29530" label="1100001011 (1) 1100000011" source="27116" target="27376" cy:directed="1"/>
      <edge id="29529" label="1100001011 (1) 1101001011" source="27116" target="27037" cy:directed="1"/>
      <edge id="29528" label="1100001101 (1) 1100001111" source="27115" target="26819" cy:directed="1"/>
      <edge id="29527" label="1100001101 (1) 1100000101" source="27115" target="27375" cy:directed="1"/>
      <edge id="29526" label="1100001101 (1) 1101001101" source="27115" target="27036" cy:directed="1"/>
      <edge id="29525" label="1101001001 (1) 1101001011" source="27114" target="27037" cy:directed="1"/>
      <edge id="29524" label="1101001001 (1) 1101001101" source="27114" target="27036" cy:directed="1"/>
      <edge id="29523" label="1101001001 (1) 1101000001" source="27114" target="27374" cy:directed="1"/>
      <edge id="29522" label="1101001001 (1) 1101101001" source="27114" target="27035" cy:directed="1"/>
      <edge id="29521" label="0100001001 (1) 0100001011" source="27113" target="27112" cy:directed="1"/>
      <edge id="29520" label="0100001001 (1) 0100001101" source="27113" target="27111" cy:directed="1"/>
      <edge id="29519" label="0100001001 (1) 0100000001" source="27113" target="27373" cy:directed="1"/>
      <edge id="29518" label="0100001001 (1) 0101001001" source="27113" target="27110" cy:directed="1"/>
      <edge id="29517" label="0100001001 (1) 0000001001" source="27113" target="27122" cy:directed="1"/>
      <edge id="29516" label="0100001011 (1) 0100001111" source="27112" target="26817" cy:directed="1"/>
      <edge id="29515" label="0100001011 (1) 0100000011" source="27112" target="27372" cy:directed="1"/>
      <edge id="29514" label="0100001011 (1) 0101001011" source="27112" target="27032" cy:directed="1"/>
      <edge id="29513" label="0100001011 (1) 0000001011" source="27112" target="27121" cy:directed="1"/>
      <edge id="29512" label="0100001101 (1) 0100001111" source="27111" target="26817" cy:directed="1"/>
      <edge id="29511" label="0100001101 (1) 0100000101" source="27111" target="27371" cy:directed="1"/>
      <edge id="29510" label="0100001101 (1) 0101001101" source="27111" target="27031" cy:directed="1"/>
      <edge id="29509" label="0100001101 (1) 0000001101" source="27111" target="27120" cy:directed="1"/>
      <edge id="29508" label="0101001001 (1) 0101001011" source="27110" target="27032" cy:directed="1"/>
      <edge id="29507" label="0101001001 (1) 0101001101" source="27110" target="27031" cy:directed="1"/>
      <edge id="29506" label="0101001001 (1) 0101000001" source="27110" target="27370" cy:directed="1"/>
      <edge id="29505" label="0101001001 (1) 0101101001" source="27110" target="27030" cy:directed="1"/>
      <edge id="29504" label="0101001001 (1) 0001001001" source="27110" target="27119" cy:directed="1"/>
      <edge id="29503" label="1001011110 (1) 1001010110" source="27109" target="27367" cy:directed="1"/>
      <edge id="29502" label="1001011110 (1) 1001001110" source="27109" target="27291" cy:directed="1"/>
      <edge id="29501" label="1001011110 (1) 1011011110" source="27109" target="27065" cy:directed="1"/>
      <edge id="29500" label="0001011110 (1) 0001010110" source="27108" target="27369" cy:directed="1"/>
      <edge id="29499" label="0001011110 (1) 0001001110" source="27108" target="27289" cy:directed="1"/>
      <edge id="29498" label="0001011110 (1) 0011011110" source="27108" target="27063" cy:directed="1"/>
      <edge id="29497" label="1011010001 (1) 1011010011" source="27107" target="27106" cy:directed="1"/>
      <edge id="29496" label="1011010001 (1) 1011010101" source="27107" target="27105" cy:directed="1"/>
      <edge id="29495" label="1011010001 (1) 1011011001" source="27107" target="27104" cy:directed="1"/>
      <edge id="29494" label="1011010001 (1) 1011000001" source="27107" target="27284" cy:directed="1"/>
      <edge id="29493" label="1011010001 (1) 1010010001" source="27107" target="27192" cy:directed="1"/>
      <edge id="29492" label="1011010001 (1) 1001010001" source="27107" target="27221" cy:directed="1"/>
      <edge id="29491" label="1011010011 (1) 1011010111" source="27106" target="26814" cy:directed="1"/>
      <edge id="29490" label="1011010011 (1) 1011000011" source="27106" target="27283" cy:directed="1"/>
      <edge id="29489" label="1011010011 (1) 1010010011" source="27106" target="27191" cy:directed="1"/>
      <edge id="29488" label="1011010011 (1) 1001010011" source="27106" target="27153" cy:directed="1"/>
      <edge id="29487" label="1011010101 (1) 1011010111" source="27105" target="26814" cy:directed="1"/>
      <edge id="29486" label="1011010101 (1) 1011011101" source="27105" target="26887" cy:directed="1"/>
      <edge id="29485" label="1011010101 (1) 1011000101" source="27105" target="27282" cy:directed="1"/>
      <edge id="29484" label="1011010101 (1) 1011110101" source="27105" target="26974" cy:directed="1"/>
      <edge id="29483" label="1011010101 (1) 1010010101" source="27105" target="27190" cy:directed="1"/>
      <edge id="29482" label="1011011001 (1) 1011011011" source="27104" target="26888" cy:directed="1"/>
      <edge id="29481" label="1011011001 (1) 1011011101" source="27104" target="26887" cy:directed="1"/>
      <edge id="29480" label="1011011001 (1) 1011001001" source="27104" target="27019" cy:directed="1"/>
      <edge id="29479" label="1011011001 (1) 1010011001" source="27104" target="27189" cy:directed="1"/>
      <edge id="29478" label="1011011001 (1) 1001011001" source="27104" target="27151" cy:directed="1"/>
      <edge id="29477" label="0011010001 (1) 0011010011" source="27103" target="27102" cy:directed="1"/>
      <edge id="29476" label="0011010001 (1) 0011010101" source="27103" target="27101" cy:directed="1"/>
      <edge id="29475" label="0011010001 (1) 0011011001" source="27103" target="27100" cy:directed="1"/>
      <edge id="29474" label="0011010001 (1) 0011000001" source="27103" target="27287" cy:directed="1"/>
      <edge id="29473" label="0011010001 (1) 0010010001" source="27103" target="27183" cy:directed="1"/>
      <edge id="29472" label="0011010001 (1) 0001010001" source="27103" target="27216" cy:directed="1"/>
      <edge id="29471" label="0011010011 (1) 0011010111" source="27102" target="26812" cy:directed="1"/>
      <edge id="29470" label="0011010011 (1) 0011000011" source="27102" target="27286" cy:directed="1"/>
      <edge id="29469" label="0011010011 (1) 0010010011" source="27102" target="27182" cy:directed="1"/>
      <edge id="29468" label="0011010011 (1) 0001010011" source="27102" target="27150" cy:directed="1"/>
      <edge id="29467" label="0011010101 (1) 0011010111" source="27101" target="26812" cy:directed="1"/>
      <edge id="29466" label="0011010101 (1) 0011011101" source="27101" target="26891" cy:directed="1"/>
      <edge id="29465" label="0011010101 (1) 0011000101" source="27101" target="27285" cy:directed="1"/>
      <edge id="29464" label="0011010101 (1) 0011110101" source="27101" target="26971" cy:directed="1"/>
      <edge id="29463" label="0011010101 (1) 0010010101" source="27101" target="27181" cy:directed="1"/>
      <edge id="29462" label="0011011001 (1) 0011011011" source="27100" target="26892" cy:directed="1"/>
      <edge id="29461" label="0011011001 (1) 0011011101" source="27100" target="26891" cy:directed="1"/>
      <edge id="29460" label="0011011001 (1) 0011001001" source="27100" target="27013" cy:directed="1"/>
      <edge id="29459" label="0011011001 (1) 0010011001" source="27100" target="27180" cy:directed="1"/>
      <edge id="29458" label="0011011001 (1) 0001011001" source="27100" target="27148" cy:directed="1"/>
      <edge id="29457" label="1101011110 (1) 1101010110" source="27099" target="27361" cy:directed="1"/>
      <edge id="29456" label="1101011110 (1) 1101001110" source="27099" target="27280" cy:directed="1"/>
      <edge id="29455" label="1101011110 (1) 1101111110" source="27099" target="26907" cy:directed="1"/>
      <edge id="29454" label="1101011110 (1) 1001011110" source="27099" target="27109" cy:directed="1"/>
      <edge id="29453" label="0010111010 (1) 0010111000" source="27098" target="27563" cy:directed="1"/>
      <edge id="29452" label="0010111010 (1) 0010111110" source="27098" target="26924" cy:directed="1"/>
      <edge id="29451" label="0010111010 (1) 0010110010" source="27098" target="27363" cy:directed="1"/>
      <edge id="29450" label="0010111010 (1) 0010011010" source="27098" target="27466" cy:directed="1"/>
      <edge id="29449" label="0101011110 (1) 0101010110" source="27097" target="27362" cy:directed="1"/>
      <edge id="29448" label="0101011110 (1) 0101001110" source="27097" target="27278" cy:directed="1"/>
      <edge id="29447" label="0101011110 (1) 0101111110" source="27097" target="26906" cy:directed="1"/>
      <edge id="29446" label="0101011110 (1) 0001011110" source="27097" target="27108" cy:directed="1"/>
      <edge id="29445" label="1010111010 (1) 1010111000" source="27096" target="27565" cy:directed="1"/>
      <edge id="29444" label="1010111010 (1) 1010111110" source="27096" target="26925" cy:directed="1"/>
      <edge id="29443" label="1010111010 (1) 1010110010" source="27096" target="27365" cy:directed="1"/>
      <edge id="29442" label="1010111010 (1) 1010011010" source="27096" target="27468" cy:directed="1"/>
      <edge id="29441" label="1110101010 (1) 1110101000" source="27095" target="27501" cy:directed="1"/>
      <edge id="29440" label="1110101010 (1) 1110100010" source="27095" target="27364" cy:directed="1"/>
      <edge id="29439" label="1110101010 (1) 1110111010" source="27095" target="27086" cy:directed="1"/>
      <edge id="29438" label="1110101010 (1) 1110001010" source="27095" target="27571" cy:directed="1"/>
      <edge id="29437" label="1110101010 (1) 1100101010" source="27095" target="27139" cy:directed="1"/>
      <edge id="29436" label="0111010001 (1) 0111010011" source="27094" target="27093" cy:directed="1"/>
      <edge id="29435" label="0111010001 (1) 0111010101" source="27094" target="27092" cy:directed="1"/>
      <edge id="29434" label="0111010001 (1) 0111011001" source="27094" target="27091" cy:directed="1"/>
      <edge id="29433" label="0111010001 (1) 0111000001" source="27094" target="27273" cy:directed="1"/>
      <edge id="29432" label="0111010001 (1) 0111110001" source="27094" target="27168" cy:directed="1"/>
      <edge id="29431" label="0111010001 (1) 0110010001" source="27094" target="27167" cy:directed="1"/>
      <edge id="29430" label="0111010001 (1) 0101010001" source="27094" target="27196" cy:directed="1"/>
      <edge id="29429" label="0111010001 (1) 0011010001" source="27094" target="27103" cy:directed="1"/>
      <edge id="29428" label="0111010011 (1) 0111010111" source="27093" target="26811" cy:directed="1"/>
      <edge id="29427" label="0111010011 (1) 0111000011" source="27093" target="27272" cy:directed="1"/>
      <edge id="29426" label="0111010011 (1) 0111110011" source="27093" target="26781" cy:directed="1"/>
      <edge id="29425" label="0111010011 (1) 0110010011" source="27093" target="27166" cy:directed="1"/>
      <edge id="29424" label="0111010011 (1) 0101010011" source="27093" target="27135" cy:directed="1"/>
      <edge id="29423" label="0111010011 (1) 0011010011" source="27093" target="27102" cy:directed="1"/>
      <edge id="29422" label="0111010101 (1) 0111010111" source="27092" target="26811" cy:directed="1"/>
      <edge id="29421" label="0111010101 (1) 0111011101" source="27092" target="26882" cy:directed="1"/>
      <edge id="29420" label="0111010101 (1) 0111000101" source="27092" target="27271" cy:directed="1"/>
      <edge id="29419" label="0111010101 (1) 0111110101" source="27092" target="26967" cy:directed="1"/>
      <edge id="29418" label="0111010101 (1) 0110010101" source="27092" target="27165" cy:directed="1"/>
      <edge id="29417" label="0111010101 (1) 0101010101" source="27092" target="27134" cy:directed="1"/>
      <edge id="29416" label="0111010101 (1) 0011010101" source="27092" target="27101" cy:directed="1"/>
      <edge id="29415" label="0111011001 (1) 0111011011" source="27091" target="26883" cy:directed="1"/>
      <edge id="29414" label="0111011001 (1) 0111011101" source="27091" target="26882" cy:directed="1"/>
      <edge id="29413" label="0111011001 (1) 0111001001" source="27091" target="27001" cy:directed="1"/>
      <edge id="29412" label="0111011001 (1) 0111111001" source="27091" target="26966" cy:directed="1"/>
      <edge id="29411" label="0111011001 (1) 0110011001" source="27091" target="27164" cy:directed="1"/>
      <edge id="29410" label="0111011001 (1) 0101011001" source="27091" target="27133" cy:directed="1"/>
      <edge id="29409" label="0111011001 (1) 0011011001" source="27091" target="27100" cy:directed="1"/>
      <edge id="29408" label="1111010001 (1) 1111010011" source="27090" target="27089" cy:directed="1"/>
      <edge id="29407" label="1111010001 (1) 1111010101" source="27090" target="27088" cy:directed="1"/>
      <edge id="29406" label="1111010001 (1) 1111011001" source="27090" target="27087" cy:directed="1"/>
      <edge id="29405" label="1111010001 (1) 1111000001" source="27090" target="27281" cy:directed="1"/>
      <edge id="29404" label="1111010001 (1) 1111110001" source="27090" target="27174" cy:directed="1"/>
      <edge id="29403" label="1111010001 (1) 1110010001" source="27090" target="27173" cy:directed="1"/>
      <edge id="29402" label="1111010001 (1) 1101010001" source="27090" target="27203" cy:directed="1"/>
      <edge id="29401" label="1111010001 (1) 1011010001" source="27090" target="27107" cy:directed="1"/>
      <edge id="29400" label="1111010011 (1) 1111010111" source="27089" target="26810" cy:directed="1"/>
      <edge id="29399" label="1111010011 (1) 1111000011" source="27089" target="27276" cy:directed="1"/>
      <edge id="29398" label="1111010011 (1) 1111110011" source="27089" target="26784" cy:directed="1"/>
      <edge id="29397" label="1111010011 (1) 1110010011" source="27089" target="27172" cy:directed="1"/>
      <edge id="29396" label="1111010011 (1) 1101010011" source="27089" target="27138" cy:directed="1"/>
      <edge id="29395" label="1111010011 (1) 1011010011" source="27089" target="27106" cy:directed="1"/>
      <edge id="29394" label="1111010101 (1) 1111010111" source="27088" target="26810" cy:directed="1"/>
      <edge id="29393" label="1111010101 (1) 1111011101" source="27088" target="26880" cy:directed="1"/>
      <edge id="29392" label="1111010101 (1) 1111000101" source="27088" target="27275" cy:directed="1"/>
      <edge id="29391" label="1111010101 (1) 1111110101" source="27088" target="26969" cy:directed="1"/>
      <edge id="29390" label="1111010101 (1) 1110010101" source="27088" target="27171" cy:directed="1"/>
      <edge id="29389" label="1111010101 (1) 1101010101" source="27088" target="27137" cy:directed="1"/>
      <edge id="29388" label="1111010101 (1) 1011010101" source="27088" target="27105" cy:directed="1"/>
      <edge id="29387" label="1111011001 (1) 1111011011" source="27087" target="26881" cy:directed="1"/>
      <edge id="29386" label="1111011001 (1) 1111011101" source="27087" target="26880" cy:directed="1"/>
      <edge id="29385" label="1111011001 (1) 1111001001" source="27087" target="27016" cy:directed="1"/>
      <edge id="29384" label="1111011001 (1) 1111111001" source="27087" target="26968" cy:directed="1"/>
      <edge id="29383" label="1111011001 (1) 1110011001" source="27087" target="27170" cy:directed="1"/>
      <edge id="29382" label="1111011001 (1) 1101011001" source="27087" target="27136" cy:directed="1"/>
      <edge id="29381" label="1111011001 (1) 1011011001" source="27087" target="27104" cy:directed="1"/>
      <edge id="29380" label="1110111010 (1) 1110111000" source="27086" target="27561" cy:directed="1"/>
      <edge id="29379" label="1110111010 (1) 1110111110" source="27086" target="26922" cy:directed="1"/>
      <edge id="29378" label="1110111010 (1) 1110110010" source="27086" target="27360" cy:directed="1"/>
      <edge id="29377" label="1110111010 (1) 1110011010" source="27086" target="27463" cy:directed="1"/>
      <edge id="29376" label="1110111010 (1) 1100111010" source="27086" target="27131" cy:directed="1"/>
      <edge id="29375" label="1110111010 (1) 1010111010" source="27086" target="27096" cy:directed="1"/>
      <edge id="29374" label="0110101010 (1) 0110101000" source="27085" target="27500" cy:directed="1"/>
      <edge id="29373" label="0110101010 (1) 0110100010" source="27085" target="27350" cy:directed="1"/>
      <edge id="29372" label="0110101010 (1) 0110111010" source="27085" target="27084" cy:directed="1"/>
      <edge id="29371" label="0110101010 (1) 0110001010" source="27085" target="27568" cy:directed="1"/>
      <edge id="29370" label="0110101010 (1) 0100101010" source="27085" target="27129" cy:directed="1"/>
      <edge id="29369" label="0110101010 (1) 0010101010" source="27085" target="27144" cy:directed="1"/>
      <edge id="29368" label="0110111010 (1) 0110111000" source="27084" target="27558" cy:directed="1"/>
      <edge id="29367" label="0110111010 (1) 0110111110" source="27084" target="26923" cy:directed="1"/>
      <edge id="29366" label="0110111010 (1) 0110110010" source="27084" target="27349" cy:directed="1"/>
      <edge id="29365" label="0110111010 (1) 0110011010" source="27084" target="27460" cy:directed="1"/>
      <edge id="29364" label="0110111010 (1) 0100111010" source="27084" target="27128" cy:directed="1"/>
      <edge id="29363" label="0110111010 (1) 0010111010" source="27084" target="27098" cy:directed="1"/>
      <edge id="29362" label="1010001001 (1) 1010001011" source="27083" target="27082" cy:directed="1"/>
      <edge id="29361" label="1010001001 (1) 1010001101" source="27083" target="27081" cy:directed="1"/>
      <edge id="29360" label="1010001001 (1) 1010000001" source="27083" target="27348" cy:directed="1"/>
      <edge id="29359" label="1010001001 (1) 1000001001" source="27083" target="27127" cy:directed="1"/>
      <edge id="29358" label="1010001001 (1) 1110001001" source="27083" target="27080" cy:directed="1"/>
      <edge id="29357" label="1010001011 (1) 1010001111" source="27082" target="26808" cy:directed="1"/>
      <edge id="29356" label="1010001011 (1) 1010000011" source="27082" target="27347" cy:directed="1"/>
      <edge id="29355" label="1010001011 (1) 1000001011" source="27082" target="27126" cy:directed="1"/>
      <edge id="29354" label="1010001011 (1) 1110001011" source="27082" target="27074" cy:directed="1"/>
      <edge id="29353" label="1010001101 (1) 1010001111" source="27081" target="26808" cy:directed="1"/>
      <edge id="29352" label="1010001101 (1) 1010000101" source="27081" target="27346" cy:directed="1"/>
      <edge id="29351" label="1010001101 (1) 1110001101" source="27081" target="27073" cy:directed="1"/>
      <edge id="29350" label="1110001001 (1) 1110001011" source="27080" target="27074" cy:directed="1"/>
      <edge id="29349" label="1110001001 (1) 1110001101" source="27080" target="27073" cy:directed="1"/>
      <edge id="29348" label="1110001001 (1) 1110000001" source="27080" target="27345" cy:directed="1"/>
      <edge id="29347" label="1110001001 (1) 1100001001" source="27080" target="27123" cy:directed="1"/>
      <edge id="29346" label="0010001001 (1) 0010001011" source="27079" target="27078" cy:directed="1"/>
      <edge id="29345" label="0010001001 (1) 0010001101" source="27079" target="27077" cy:directed="1"/>
      <edge id="29344" label="0010001001 (1) 0010000001" source="27079" target="27344" cy:directed="1"/>
      <edge id="29343" label="0010001001 (1) 0000001001" source="27079" target="27122" cy:directed="1"/>
      <edge id="29342" label="0010001011 (1) 0010001111" source="27078" target="26809" cy:directed="1"/>
      <edge id="29341" label="0010001011 (1) 0010000011" source="27078" target="27343" cy:directed="1"/>
      <edge id="29340" label="0010001011 (1) 0000001011" source="27078" target="27121" cy:directed="1"/>
      <edge id="29339" label="0010001101 (1) 0010001111" source="27077" target="26809" cy:directed="1"/>
      <edge id="29338" label="0010001101 (1) 0010000101" source="27077" target="27342" cy:directed="1"/>
      <edge id="29337" label="1001100110 (1) 1001100100" source="27076" target="27498" cy:directed="1"/>
      <edge id="29336" label="1001100110 (1) 1001100010" source="27076" target="27399" cy:directed="1"/>
      <edge id="29335" label="1001100110 (1) 1001110110" source="27076" target="26962" cy:directed="1"/>
      <edge id="29334" label="1001100110 (1) 1011100110" source="27076" target="27048" cy:directed="1"/>
      <edge id="29333" label="1001100110 (1) 1101100110" source="27076" target="27064" cy:directed="1"/>
      <edge id="29332" label="0001100110 (1) 0001100100" source="27075" target="27495" cy:directed="1"/>
      <edge id="29331" label="0001100110 (1) 0001100010" source="27075" target="27394" cy:directed="1"/>
      <edge id="29330" label="0001100110 (1) 0001110110" source="27075" target="26961" cy:directed="1"/>
      <edge id="29329" label="0001100110 (1) 0011100110" source="27075" target="27043" cy:directed="1"/>
      <edge id="29328" label="1110001011 (1) 1110001111" source="27074" target="26800" cy:directed="1"/>
      <edge id="29327" label="1110001011 (1) 1110000011" source="27074" target="27334" cy:directed="1"/>
      <edge id="29326" label="1110001011 (1) 1100001011" source="27074" target="27116" cy:directed="1"/>
      <edge id="29325" label="1110001101 (1) 1110001111" source="27073" target="26800" cy:directed="1"/>
      <edge id="29324" label="1110001101 (1) 1110000101" source="27073" target="27333" cy:directed="1"/>
      <edge id="29323" label="1110001101 (1) 1100001101" source="27073" target="27115" cy:directed="1"/>
      <edge id="29322" label="1000110101 (1) 1000111101" source="27072" target="26879" cy:directed="1"/>
      <edge id="29321" label="1000110101 (1) 1001110101" source="27072" target="27009" cy:directed="1"/>
      <edge id="29320" label="1000110101 (1) 1010110101" source="27072" target="27050" cy:directed="1"/>
      <edge id="29319" label="1000111001 (1) 1000111101" source="27071" target="26879" cy:directed="1"/>
      <edge id="29318" label="1000111001 (1) 1000011001" source="27071" target="27222" cy:directed="1"/>
      <edge id="29317" label="1000111001 (1) 1001111001" source="27071" target="27008" cy:directed="1"/>
      <edge id="29316" label="1000111001 (1) 1010111001" source="27071" target="27049" cy:directed="1"/>
      <edge id="29315" label="0110001001 (1) 0110001011" source="27070" target="27069" cy:directed="1"/>
      <edge id="29314" label="0110001001 (1) 0110001101" source="27070" target="27068" cy:directed="1"/>
      <edge id="29313" label="0110001001 (1) 0110000001" source="27070" target="27332" cy:directed="1"/>
      <edge id="29312" label="0110001001 (1) 0100001001" source="27070" target="27113" cy:directed="1"/>
      <edge id="29311" label="0110001001 (1) 0010001001" source="27070" target="27079" cy:directed="1"/>
      <edge id="29310" label="0110001011 (1) 0110001111" source="27069" target="26796" cy:directed="1"/>
      <edge id="29309" label="0110001011 (1) 0110000011" source="27069" target="27331" cy:directed="1"/>
      <edge id="29308" label="0110001011 (1) 0100001011" source="27069" target="27112" cy:directed="1"/>
      <edge id="29307" label="0110001011 (1) 0010001011" source="27069" target="27078" cy:directed="1"/>
      <edge id="29306" label="0110001101 (1) 0110001111" source="27068" target="26796" cy:directed="1"/>
      <edge id="29305" label="0110001101 (1) 0110000101" source="27068" target="27330" cy:directed="1"/>
      <edge id="29304" label="0110001101 (1) 0100001101" source="27068" target="27111" cy:directed="1"/>
      <edge id="29303" label="0110001101 (1) 0010001101" source="27068" target="27077" cy:directed="1"/>
      <edge id="29302" label="0000110101 (1) 0000111101" source="27067" target="26878" cy:directed="1"/>
      <edge id="29301" label="0000110101 (1) 0001110101" source="27067" target="27003" cy:directed="1"/>
      <edge id="29300" label="0000110101 (1) 0010110101" source="27067" target="27047" cy:directed="1"/>
      <edge id="29299" label="0000111001 (1) 0000111101" source="27066" target="26878" cy:directed="1"/>
      <edge id="29298" label="0000111001 (1) 0000011001" source="27066" target="27217" cy:directed="1"/>
      <edge id="29297" label="0000111001 (1) 0001111001" source="27066" target="27002" cy:directed="1"/>
      <edge id="29296" label="0000111001 (1) 0010111001" source="27066" target="27046" cy:directed="1"/>
      <edge id="29295" label="1011011110 (1) 1011010110" source="27065" target="27326" cy:directed="1"/>
      <edge id="29294" label="1011011110 (1) 1011001110" source="27065" target="27258" cy:directed="1"/>
      <edge id="29293" label="1011011110 (1) 1010011110" source="27065" target="27160" cy:directed="1"/>
      <edge id="29292" label="1101100110 (1) 1101100100" source="27064" target="27492" cy:directed="1"/>
      <edge id="29291" label="1101100110 (1) 1101100010" source="27064" target="27445" cy:directed="1"/>
      <edge id="29290" label="1101100110 (1) 1101110110" source="27064" target="26956" cy:directed="1"/>
      <edge id="29289" label="1101100110 (1) 1111100110" source="27064" target="27039" cy:directed="1"/>
      <edge id="29288" label="0011011110 (1) 0011010110" source="27063" target="27327" cy:directed="1"/>
      <edge id="29287" label="0011011110 (1) 0011001110" source="27063" target="27256" cy:directed="1"/>
      <edge id="29286" label="0011011110 (1) 0010011110" source="27063" target="27161" cy:directed="1"/>
      <edge id="29285" label="0101100110 (1) 0101100100" source="27062" target="27490" cy:directed="1"/>
      <edge id="29284" label="0101100110 (1) 0101100010" source="27062" target="27441" cy:directed="1"/>
      <edge id="29283" label="0101100110 (1) 0101110110" source="27062" target="26954" cy:directed="1"/>
      <edge id="29282" label="0101100110 (1) 0111100110" source="27062" target="27038" cy:directed="1"/>
      <edge id="29281" label="0101100110 (1) 0001100110" source="27062" target="27075" cy:directed="1"/>
      <edge id="29280" label="1100110101 (1) 1100111101" source="27061" target="26873" cy:directed="1"/>
      <edge id="29279" label="1100110101 (1) 1101110101" source="27061" target="26997" cy:directed="1"/>
      <edge id="29278" label="1100110101 (1) 1110110101" source="27061" target="27034" cy:directed="1"/>
      <edge id="29277" label="1100110101 (1) 1000110101" source="27061" target="27072" cy:directed="1"/>
      <edge id="29276" label="1100111001 (1) 1100111101" source="27060" target="26873" cy:directed="1"/>
      <edge id="29275" label="1100111001 (1) 1100011001" source="27060" target="27204" cy:directed="1"/>
      <edge id="29274" label="1100111001 (1) 1101111001" source="27060" target="26996" cy:directed="1"/>
      <edge id="29273" label="1100111001 (1) 1000111001" source="27060" target="27071" cy:directed="1"/>
      <edge id="29272" label="0100110101 (1) 0100111101" source="27059" target="26872" cy:directed="1"/>
      <edge id="29271" label="0100110101 (1) 0101110101" source="27059" target="26995" cy:directed="1"/>
      <edge id="29270" label="0100110101 (1) 0110110101" source="27059" target="27029" cy:directed="1"/>
      <edge id="29269" label="0100110101 (1) 0000110101" source="27059" target="27067" cy:directed="1"/>
      <edge id="29268" label="0100111001 (1) 0100111101" source="27058" target="26872" cy:directed="1"/>
      <edge id="29267" label="0100111001 (1) 0100011001" source="27058" target="27197" cy:directed="1"/>
      <edge id="29266" label="0100111001 (1) 0101111001" source="27058" target="26994" cy:directed="1"/>
      <edge id="29265" label="0100111001 (1) 0000111001" source="27058" target="27066" cy:directed="1"/>
      <edge id="29264" label="0111011110 (1) 0111010110" source="27057" target="27324" cy:directed="1"/>
      <edge id="29263" label="0111011110 (1) 0111001110" source="27057" target="27247" cy:directed="1"/>
      <edge id="29262" label="0111011110 (1) 0111111110" source="27057" target="26894" cy:directed="1"/>
      <edge id="29261" label="0111011110 (1) 0110011110" source="27057" target="27154" cy:directed="1"/>
      <edge id="29260" label="0111011110 (1) 0101011110" source="27057" target="27097" cy:directed="1"/>
      <edge id="29259" label="0111011110 (1) 0011011110" source="27057" target="27063" cy:directed="1"/>
      <edge id="29258" label="1111011110 (1) 1111010110" source="27056" target="27322" cy:directed="1"/>
      <edge id="29257" label="1111011110 (1) 1111001110" source="27056" target="27250" cy:directed="1"/>
      <edge id="29256" label="1111011110 (1) 1111111110" source="27056" target="26895" cy:directed="1"/>
      <edge id="29255" label="1111011110 (1) 1110011110" source="27056" target="27155" cy:directed="1"/>
      <edge id="29254" label="1111011110 (1) 1101011110" source="27056" target="27099" cy:directed="1"/>
      <edge id="29253" label="1111011110 (1) 1011011110" source="27056" target="27065" cy:directed="1"/>
      <edge id="29252" label="0001111010 (1) 0001111000" source="27055" target="27533" cy:directed="1"/>
      <edge id="29251" label="0001111010 (1) 0001111110" source="27055" target="26908" cy:directed="1"/>
      <edge id="29250" label="0001111010 (1) 0001110010" source="27055" target="27316" cy:directed="1"/>
      <edge id="29249" label="0001111010 (1) 0001011010" source="27055" target="27452" cy:directed="1"/>
      <edge id="29248" label="0001111010 (1) 0011111010" source="27055" target="27025" cy:directed="1"/>
      <edge id="29247" label="0011101010 (1) 0011101000" source="27054" target="27485" cy:directed="1"/>
      <edge id="29246" label="0011101010 (1) 0011100010" source="27054" target="27315" cy:directed="1"/>
      <edge id="29245" label="0011101010 (1) 0011111010" source="27054" target="27025" cy:directed="1"/>
      <edge id="29244" label="0011101010 (1) 0011001010" source="27054" target="27540" cy:directed="1"/>
      <edge id="29243" label="0011101010 (1) 0010101010" source="27054" target="27144" cy:directed="1"/>
      <edge id="29242" label="1001111010 (1) 1001111000" source="27053" target="27539" cy:directed="1"/>
      <edge id="29241" label="1001111010 (1) 1001111110" source="27053" target="26909" cy:directed="1"/>
      <edge id="29240" label="1001111010 (1) 1001110010" source="27053" target="27319" cy:directed="1"/>
      <edge id="29239" label="1001111010 (1) 1001011010" source="27053" target="27454" cy:directed="1"/>
      <edge id="29238" label="1001111010 (1) 1011111010" source="27053" target="27024" cy:directed="1"/>
      <edge id="29237" label="1011101010 (1) 1011101000" source="27052" target="27484" cy:directed="1"/>
      <edge id="29236" label="1011101010 (1) 1011100010" source="27052" target="27318" cy:directed="1"/>
      <edge id="29235" label="1011101010 (1) 1011111010" source="27052" target="27024" cy:directed="1"/>
      <edge id="29234" label="1011101010 (1) 1011001010" source="27052" target="27548" cy:directed="1"/>
      <edge id="29233" label="1011101010 (1) 1010101010" source="27052" target="27140" cy:directed="1"/>
      <edge id="29232" label="1011101010 (1) 1111101010" source="27052" target="27157" cy:directed="1"/>
      <edge id="29231" label="1101111010 (1) 1101111000" source="27051" target="27525" cy:directed="1"/>
      <edge id="29230" label="1101111010 (1) 1101111110" source="27051" target="26907" cy:directed="1"/>
      <edge id="29229" label="1101111010 (1) 1101110010" source="27051" target="27310" cy:directed="1"/>
      <edge id="29228" label="1101111010 (1) 1001111010" source="27051" target="27053" cy:directed="1"/>
      <edge id="29227" label="1010110101 (1) 1010111101" source="27050" target="26856" cy:directed="1"/>
      <edge id="29226" label="1010111001 (1) 1010111101" source="27049" target="26856" cy:directed="1"/>
      <edge id="29225" label="1010111001 (1) 1010011001" source="27049" target="27189" cy:directed="1"/>
      <edge id="29224" label="1011100110 (1) 1011100100" source="27048" target="27480" cy:directed="1"/>
      <edge id="29223" label="1011100110 (1) 1011100010" source="27048" target="27318" cy:directed="1"/>
      <edge id="29222" label="1011100110 (1) 1011110110" source="27048" target="26949" cy:directed="1"/>
      <edge id="29221" label="1011100110 (1) 1010100110" source="27048" target="27132" cy:directed="1"/>
      <edge id="29220" label="1011100110 (1) 1111100110" source="27048" target="27039" cy:directed="1"/>
      <edge id="29219" label="0010110101 (1) 0010111101" source="27047" target="26853" cy:directed="1"/>
      <edge id="29218" label="0010111001 (1) 0010111101" source="27046" target="26853" cy:directed="1"/>
      <edge id="29217" label="0010111001 (1) 0010011001" source="27046" target="27180" cy:directed="1"/>
      <edge id="29216" label="1001001011 (1) 1001001111" source="27045" target="26783" cy:directed="1"/>
      <edge id="29215" label="1001001011 (1) 1001000011" source="27045" target="27308" cy:directed="1"/>
      <edge id="29214" label="1001001011 (1) 1101001011" source="27045" target="27037" cy:directed="1"/>
      <edge id="29213" label="1001001101 (1) 1001001111" source="27044" target="26783" cy:directed="1"/>
      <edge id="29212" label="1001001101 (1) 1001000101" source="27044" target="27307" cy:directed="1"/>
      <edge id="29211" label="1001001101 (1) 1011001101" source="27044" target="27017" cy:directed="1"/>
      <edge id="29210" label="1001001101 (1) 1101001101" source="27044" target="27036" cy:directed="1"/>
      <edge id="29209" label="0011100110 (1) 0011100100" source="27043" target="27477" cy:directed="1"/>
      <edge id="29208" label="0011100110 (1) 0011100010" source="27043" target="27315" cy:directed="1"/>
      <edge id="29207" label="0011100110 (1) 0011110110" source="27043" target="26947" cy:directed="1"/>
      <edge id="29206" label="0011100110 (1) 0010100110" source="27043" target="27130" cy:directed="1"/>
      <edge id="29205" label="0001001011 (1) 0001001111" source="27042" target="26780" cy:directed="1"/>
      <edge id="29204" label="0001001011 (1) 0001000011" source="27042" target="27312" cy:directed="1"/>
      <edge id="29203" label="0001001101 (1) 0001001111" source="27041" target="26780" cy:directed="1"/>
      <edge id="29202" label="0001001101 (1) 0001000101" source="27041" target="27311" cy:directed="1"/>
      <edge id="29201" label="0001001101 (1) 0011001101" source="27041" target="27011" cy:directed="1"/>
      <edge id="29200" label="0101111010 (1) 0101111000" source="27040" target="27524" cy:directed="1"/>
      <edge id="29199" label="0101111010 (1) 0101111110" source="27040" target="26906" cy:directed="1"/>
      <edge id="29198" label="0101111010 (1) 0101110010" source="27040" target="27304" cy:directed="1"/>
      <edge id="29197" label="0101111010 (1) 0001111010" source="27040" target="27055" cy:directed="1"/>
      <edge id="29196" label="1111100110 (1) 1111100100" source="27039" target="27473" cy:directed="1"/>
      <edge id="29195" label="1111100110 (1) 1111100010" source="27039" target="27415" cy:directed="1"/>
      <edge id="29194" label="1111100110 (1) 1111110110" source="27039" target="26934" cy:directed="1"/>
      <edge id="29193" label="1111100110 (1) 1110100110" source="27039" target="27118" cy:directed="1"/>
      <edge id="29192" label="0111100110 (1) 0111100100" source="27038" target="27470" cy:directed="1"/>
      <edge id="29191" label="0111100110 (1) 0111100010" source="27038" target="27410" cy:directed="1"/>
      <edge id="29190" label="0111100110 (1) 0111110110" source="27038" target="26935" cy:directed="1"/>
      <edge id="29189" label="0111100110 (1) 0110100110" source="27038" target="27117" cy:directed="1"/>
      <edge id="29188" label="0111100110 (1) 0011100110" source="27038" target="27043" cy:directed="1"/>
      <edge id="29187" label="1101001011 (1) 1101001111" source="27037" target="26779" cy:directed="1"/>
      <edge id="29186" label="1101001011 (1) 1101000011" source="27037" target="27301" cy:directed="1"/>
      <edge id="29185" label="1101001011 (1) 1101101011" source="27037" target="26765" cy:directed="1"/>
      <edge id="29184" label="1101001101 (1) 1101001111" source="27036" target="26779" cy:directed="1"/>
      <edge id="29183" label="1101001101 (1) 1101000101" source="27036" target="27300" cy:directed="1"/>
      <edge id="29182" label="1101001101 (1) 1101101101" source="27036" target="26931" cy:directed="1"/>
      <edge id="29181" label="1101101001 (1) 1101101101" source="27035" target="26931" cy:directed="1"/>
      <edge id="29180" label="1101101001 (1) 1101100001" source="27035" target="27299" cy:directed="1"/>
      <edge id="29179" label="1101101001 (1) 1101111001" source="27035" target="26996" cy:directed="1"/>
      <edge id="29178" label="1110110101 (1) 1110111101" source="27034" target="26847" cy:directed="1"/>
      <edge id="29177" label="1110110101 (1) 1010110101" source="27034" target="27050" cy:directed="1"/>
      <edge id="29176" label="1110111001 (1) 1110111101" source="27033" target="26847" cy:directed="1"/>
      <edge id="29175" label="1110111001 (1) 1110011001" source="27033" target="27170" cy:directed="1"/>
      <edge id="29174" label="1110111001 (1) 1100111001" source="27033" target="27060" cy:directed="1"/>
      <edge id="29173" label="1110111001 (1) 1010111001" source="27033" target="27049" cy:directed="1"/>
      <edge id="29172" label="0101001011 (1) 0101001111" source="27032" target="26778" cy:directed="1"/>
      <edge id="29171" label="0101001011 (1) 0101000011" source="27032" target="27298" cy:directed="1"/>
      <edge id="29170" label="0101001011 (1) 0101101011" source="27032" target="26762" cy:directed="1"/>
      <edge id="29169" label="0101001011 (1) 0001001011" source="27032" target="27042" cy:directed="1"/>
      <edge id="29168" label="0101001101 (1) 0101001111" source="27031" target="26778" cy:directed="1"/>
      <edge id="29167" label="0101001101 (1) 0101000101" source="27031" target="27297" cy:directed="1"/>
      <edge id="29166" label="0101001101 (1) 0101101101" source="27031" target="26930" cy:directed="1"/>
      <edge id="29165" label="0101001101 (1) 0001001101" source="27031" target="27041" cy:directed="1"/>
      <edge id="29164" label="0101101001 (1) 0101101101" source="27030" target="26930" cy:directed="1"/>
      <edge id="29163" label="0101101001 (1) 0101100001" source="27030" target="27296" cy:directed="1"/>
      <edge id="29162" label="0101101001 (1) 0101111001" source="27030" target="26994" cy:directed="1"/>
      <edge id="29161" label="0101101001 (1) 0001101001" source="27030" target="26989" cy:directed="1"/>
      <edge id="29160" label="0110110101 (1) 0110111101" source="27029" target="26846" cy:directed="1"/>
      <edge id="29159" label="0110110101 (1) 0010110101" source="27029" target="27047" cy:directed="1"/>
      <edge id="29158" label="0110111001 (1) 0110111101" source="27028" target="26846" cy:directed="1"/>
      <edge id="29157" label="0110111001 (1) 0110011001" source="27028" target="27164" cy:directed="1"/>
      <edge id="29156" label="0110111001 (1) 0100111001" source="27028" target="27058" cy:directed="1"/>
      <edge id="29155" label="0110111001 (1) 0010111001" source="27028" target="27046" cy:directed="1"/>
      <edge id="29154" label="1000110110 (1) 1000110100" source="27027" target="27469" cy:directed="1"/>
      <edge id="29153" label="1000110110 (1) 1000110010" source="27027" target="27400" cy:directed="1"/>
      <edge id="29152" label="1000110110 (1) 1001110110" source="27027" target="26962" cy:directed="1"/>
      <edge id="29151" label="1000110110 (1) 1010110110" source="27027" target="26993" cy:directed="1"/>
      <edge id="29150" label="0000110110 (1) 0000110100" source="27026" target="27464" cy:directed="1"/>
      <edge id="29149" label="0000110110 (1) 0000110010" source="27026" target="27395" cy:directed="1"/>
      <edge id="29148" label="0000110110 (1) 0001110110" source="27026" target="26961" cy:directed="1"/>
      <edge id="29147" label="0000110110 (1) 0010110110" source="27026" target="26992" cy:directed="1"/>
      <edge id="29146" label="0011111010 (1) 0011111000" source="27025" target="27507" cy:directed="1"/>
      <edge id="29145" label="0011111010 (1) 0011111110" source="27025" target="26896" cy:directed="1"/>
      <edge id="29144" label="0011111010 (1) 0011110010" source="27025" target="27294" cy:directed="1"/>
      <edge id="29143" label="0011111010 (1) 0011011010" source="27025" target="27439" cy:directed="1"/>
      <edge id="29142" label="0011111010 (1) 0010111010" source="27025" target="27098" cy:directed="1"/>
      <edge id="29141" label="1011111010 (1) 1011111000" source="27024" target="27510" cy:directed="1"/>
      <edge id="29140" label="1011111010 (1) 1011111110" source="27024" target="26897" cy:directed="1"/>
      <edge id="29139" label="1011111010 (1) 1011110010" source="27024" target="27295" cy:directed="1"/>
      <edge id="29138" label="1011111010 (1) 1011011010" source="27024" target="27443" cy:directed="1"/>
      <edge id="29137" label="1011111010 (1) 1010111010" source="27024" target="27096" cy:directed="1"/>
      <edge id="29136" label="1100110110 (1) 1100110100" source="27023" target="27461" cy:directed="1"/>
      <edge id="29135" label="1100110110 (1) 1100110010" source="27023" target="27391" cy:directed="1"/>
      <edge id="29134" label="1100110110 (1) 1101110110" source="27023" target="26956" cy:directed="1"/>
      <edge id="29133" label="1100110110 (1) 1110110110" source="27023" target="26982" cy:directed="1"/>
      <edge id="29132" label="1100110110 (1) 1000110110" source="27023" target="27027" cy:directed="1"/>
      <edge id="29131" label="1111111010 (1) 1111111000" source="27022" target="27503" cy:directed="1"/>
      <edge id="29130" label="1111111010 (1) 1111111110" source="27022" target="26895" cy:directed="1"/>
      <edge id="29129" label="1111111010 (1) 1111110010" source="27022" target="27292" cy:directed="1"/>
      <edge id="29128" label="1111111010 (1) 1110111010" source="27022" target="27086" cy:directed="1"/>
      <edge id="29127" label="1111111010 (1) 1101111010" source="27022" target="27051" cy:directed="1"/>
      <edge id="29126" label="1111111010 (1) 1011111010" source="27022" target="27024" cy:directed="1"/>
      <edge id="29125" label="1000000111 (1) 1000100111" source="27021" target="26861" cy:directed="1"/>
      <edge id="29124" label="1000000111 (1) 1001000111" source="27021" target="26955" cy:directed="1"/>
      <edge id="29123" label="1000000111 (1) 1010000111" source="27021" target="26979" cy:directed="1"/>
      <edge id="29122" label="1000000111 (1) 1100000111" source="27021" target="27010" cy:directed="1"/>
      <edge id="29121" label="0111111010 (1) 0111111000" source="27020" target="27502" cy:directed="1"/>
      <edge id="29120" label="0111111010 (1) 0111111110" source="27020" target="26894" cy:directed="1"/>
      <edge id="29119" label="0111111010 (1) 0111110010" source="27020" target="27293" cy:directed="1"/>
      <edge id="29118" label="0111111010 (1) 0110111010" source="27020" target="27084" cy:directed="1"/>
      <edge id="29117" label="0111111010 (1) 0101111010" source="27020" target="27040" cy:directed="1"/>
      <edge id="29116" label="0111111010 (1) 0011111010" source="27020" target="27025" cy:directed="1"/>
      <edge id="29115" label="1011001001 (1) 1011001011" source="27019" target="27018" cy:directed="1"/>
      <edge id="29114" label="1011001001 (1) 1011001101" source="27019" target="27017" cy:directed="1"/>
      <edge id="29113" label="1011001001 (1) 1011000001" source="27019" target="27284" cy:directed="1"/>
      <edge id="29112" label="1011001001 (1) 1010001001" source="27019" target="27083" cy:directed="1"/>
      <edge id="29111" label="1011001001 (1) 1001001001" source="27019" target="27124" cy:directed="1"/>
      <edge id="29110" label="1011001001 (1) 1111001001" source="27019" target="27016" cy:directed="1"/>
      <edge id="29109" label="1011001011 (1) 1011001111" source="27018" target="26776" cy:directed="1"/>
      <edge id="29108" label="1011001011 (1) 1011000011" source="27018" target="27283" cy:directed="1"/>
      <edge id="29107" label="1011001011 (1) 1010001011" source="27018" target="27082" cy:directed="1"/>
      <edge id="29106" label="1011001011 (1) 1001001011" source="27018" target="27045" cy:directed="1"/>
      <edge id="29105" label="1011001011 (1) 1111001011" source="27018" target="27007" cy:directed="1"/>
      <edge id="29104" label="1011001101 (1) 1011001111" source="27017" target="26776" cy:directed="1"/>
      <edge id="29103" label="1011001101 (1) 1011000101" source="27017" target="27282" cy:directed="1"/>
      <edge id="29102" label="1011001101 (1) 1010001101" source="27017" target="27081" cy:directed="1"/>
      <edge id="29101" label="1011001101 (1) 1111001101" source="27017" target="27006" cy:directed="1"/>
      <edge id="29100" label="1111001001 (1) 1111001011" source="27016" target="27007" cy:directed="1"/>
      <edge id="29099" label="1111001001 (1) 1111001101" source="27016" target="27006" cy:directed="1"/>
      <edge id="29098" label="1111001001 (1) 1111000001" source="27016" target="27281" cy:directed="1"/>
      <edge id="29097" label="1111001001 (1) 1111101001" source="27016" target="27005" cy:directed="1"/>
      <edge id="29096" label="1111001001 (1) 1110001001" source="27016" target="27080" cy:directed="1"/>
      <edge id="29095" label="1111001001 (1) 1101001001" source="27016" target="27114" cy:directed="1"/>
      <edge id="29094" label="0000000111 (1) 0000100111" source="27015" target="26866" cy:directed="1"/>
      <edge id="29093" label="0000000111 (1) 0001000111" source="27015" target="26957" cy:directed="1"/>
      <edge id="29092" label="0000000111 (1) 0010000111" source="27015" target="26980" cy:directed="1"/>
      <edge id="29091" label="0100110110 (1) 0100110100" source="27014" target="27458" cy:directed="1"/>
      <edge id="29090" label="0100110110 (1) 0100110010" source="27014" target="27388" cy:directed="1"/>
      <edge id="29089" label="0100110110 (1) 0101110110" source="27014" target="26954" cy:directed="1"/>
      <edge id="29088" label="0100110110 (1) 0110110110" source="27014" target="26981" cy:directed="1"/>
      <edge id="29087" label="0100110110 (1) 0000110110" source="27014" target="27026" cy:directed="1"/>
      <edge id="29086" label="0011001001 (1) 0011001011" source="27013" target="27012" cy:directed="1"/>
      <edge id="29085" label="0011001001 (1) 0011001101" source="27013" target="27011" cy:directed="1"/>
      <edge id="29084" label="0011001001 (1) 0011000001" source="27013" target="27287" cy:directed="1"/>
      <edge id="29083" label="0011001001 (1) 0010001001" source="27013" target="27079" cy:directed="1"/>
      <edge id="29082" label="0011001001 (1) 0001001001" source="27013" target="27119" cy:directed="1"/>
      <edge id="29081" label="0011001011 (1) 0011001111" source="27012" target="26777" cy:directed="1"/>
      <edge id="29080" label="0011001011 (1) 0011000011" source="27012" target="27286" cy:directed="1"/>
      <edge id="29079" label="0011001011 (1) 0010001011" source="27012" target="27078" cy:directed="1"/>
      <edge id="29078" label="0011001011 (1) 0001001011" source="27012" target="27042" cy:directed="1"/>
      <edge id="29077" label="0011001101 (1) 0011001111" source="27011" target="26777" cy:directed="1"/>
      <edge id="29076" label="0011001101 (1) 0011000101" source="27011" target="27285" cy:directed="1"/>
      <edge id="29075" label="0011001101 (1) 0010001101" source="27011" target="27077" cy:directed="1"/>
      <edge id="29074" label="1100000111 (1) 1100100111" source="27010" target="26855" cy:directed="1"/>
      <edge id="29073" label="1100000111 (1) 1101000111" source="27010" target="26953" cy:directed="1"/>
      <edge id="29072" label="1001110101 (1) 1001111101" source="27009" target="26818" cy:directed="1"/>
      <edge id="29071" label="1001110101 (1) 1011110101" source="27009" target="26974" cy:directed="1"/>
      <edge id="29070" label="1001111001 (1) 1001111101" source="27008" target="26818" cy:directed="1"/>
      <edge id="29069" label="1001111001 (1) 1001011001" source="27008" target="27151" cy:directed="1"/>
      <edge id="29068" label="1001111001 (1) 1011111001" source="27008" target="26973" cy:directed="1"/>
      <edge id="29067" label="1111001011 (1) 1111001111" source="27007" target="26775" cy:directed="1"/>
      <edge id="29066" label="1111001011 (1) 1111000011" source="27007" target="27276" cy:directed="1"/>
      <edge id="29065" label="1111001011 (1) 1111101011" source="27007" target="26756" cy:directed="1"/>
      <edge id="29064" label="1111001011 (1) 1110001011" source="27007" target="27074" cy:directed="1"/>
      <edge id="29063" label="1111001011 (1) 1101001011" source="27007" target="27037" cy:directed="1"/>
      <edge id="29062" label="1111001101 (1) 1111001111" source="27006" target="26775" cy:directed="1"/>
      <edge id="29061" label="1111001101 (1) 1111000101" source="27006" target="27275" cy:directed="1"/>
      <edge id="29060" label="1111001101 (1) 1111101101" source="27006" target="26913" cy:directed="1"/>
      <edge id="29059" label="1111001101 (1) 1110001101" source="27006" target="27073" cy:directed="1"/>
      <edge id="29058" label="1111001101 (1) 1101001101" source="27006" target="27036" cy:directed="1"/>
      <edge id="29057" label="1111101001 (1) 1111101101" source="27005" target="26913" cy:directed="1"/>
      <edge id="29056" label="1111101001 (1) 1111100001" source="27005" target="27274" cy:directed="1"/>
      <edge id="29055" label="1111101001 (1) 1111111001" source="27005" target="26968" cy:directed="1"/>
      <edge id="29054" label="1111101001 (1) 1110101001" source="27005" target="26963" cy:directed="1"/>
      <edge id="29053" label="1111101001 (1) 1101101001" source="27005" target="27035" cy:directed="1"/>
      <edge id="29052" label="0100000111 (1) 0100100111" source="27004" target="26851" cy:directed="1"/>
      <edge id="29051" label="0100000111 (1) 0101000111" source="27004" target="26952" cy:directed="1"/>
      <edge id="29050" label="0100000111 (1) 0000000111" source="27004" target="27015" cy:directed="1"/>
      <edge id="29049" label="0001110101 (1) 0001111101" source="27003" target="26816" cy:directed="1"/>
      <edge id="29048" label="0001110101 (1) 0011110101" source="27003" target="26971" cy:directed="1"/>
      <edge id="29047" label="0001111001 (1) 0001111101" source="27002" target="26816" cy:directed="1"/>
      <edge id="29046" label="0001111001 (1) 0001011001" source="27002" target="27148" cy:directed="1"/>
      <edge id="29045" label="0001111001 (1) 0011111001" source="27002" target="26970" cy:directed="1"/>
      <edge id="29044" label="0111001001 (1) 0111001011" source="27001" target="27000" cy:directed="1"/>
      <edge id="29043" label="0111001001 (1) 0111001101" source="27001" target="26999" cy:directed="1"/>
      <edge id="29042" label="0111001001 (1) 0111000001" source="27001" target="27273" cy:directed="1"/>
      <edge id="29041" label="0111001001 (1) 0111101001" source="27001" target="26998" cy:directed="1"/>
      <edge id="29040" label="0111001001 (1) 0110001001" source="27001" target="27070" cy:directed="1"/>
      <edge id="29039" label="0111001001 (1) 0101001001" source="27001" target="27110" cy:directed="1"/>
      <edge id="29038" label="0111001001 (1) 0011001001" source="27001" target="27013" cy:directed="1"/>
      <edge id="29037" label="0111001011 (1) 0111001111" source="27000" target="26774" cy:directed="1"/>
      <edge id="29036" label="0111001011 (1) 0111000011" source="27000" target="27272" cy:directed="1"/>
      <edge id="29035" label="0111001011 (1) 0111101011" source="27000" target="26755" cy:directed="1"/>
      <edge id="29034" label="0111001011 (1) 0110001011" source="27000" target="27069" cy:directed="1"/>
      <edge id="29033" label="0111001011 (1) 0101001011" source="27000" target="27032" cy:directed="1"/>
      <edge id="29032" label="0111001011 (1) 0011001011" source="27000" target="27012" cy:directed="1"/>
      <edge id="29031" label="0111001101 (1) 0111001111" source="26999" target="26774" cy:directed="1"/>
      <edge id="29030" label="0111001101 (1) 0111000101" source="26999" target="27271" cy:directed="1"/>
      <edge id="29029" label="0111001101 (1) 0111101101" source="26999" target="26910" cy:directed="1"/>
      <edge id="29028" label="0111001101 (1) 0110001101" source="26999" target="27068" cy:directed="1"/>
      <edge id="29027" label="0111001101 (1) 0101001101" source="26999" target="27031" cy:directed="1"/>
      <edge id="29026" label="0111001101 (1) 0011001101" source="26999" target="27011" cy:directed="1"/>
      <edge id="29025" label="0111101001 (1) 0111101101" source="26998" target="26910" cy:directed="1"/>
      <edge id="29024" label="0111101001 (1) 0111100001" source="26998" target="27270" cy:directed="1"/>
      <edge id="29023" label="0111101001 (1) 0111111001" source="26998" target="26966" cy:directed="1"/>
      <edge id="29022" label="0111101001 (1) 0110101001" source="26998" target="26959" cy:directed="1"/>
      <edge id="29021" label="0111101001 (1) 0101101001" source="26998" target="27030" cy:directed="1"/>
      <edge id="29020" label="0111101001 (1) 0011101001" source="26998" target="26944" cy:directed="1"/>
      <edge id="29019" label="1101110101 (1) 1101111101" source="26997" target="26815" cy:directed="1"/>
      <edge id="29018" label="1101110101 (1) 1111110101" source="26997" target="26969" cy:directed="1"/>
      <edge id="29017" label="1101110101 (1) 1001110101" source="26997" target="27009" cy:directed="1"/>
      <edge id="29016" label="1101111001 (1) 1101111101" source="26996" target="26815" cy:directed="1"/>
      <edge id="29015" label="1101111001 (1) 1001111001" source="26996" target="27008" cy:directed="1"/>
      <edge id="29014" label="0101110101 (1) 0101111101" source="26995" target="26813" cy:directed="1"/>
      <edge id="29013" label="0101110101 (1) 0111110101" source="26995" target="26967" cy:directed="1"/>
      <edge id="29012" label="0101110101 (1) 0001110101" source="26995" target="27003" cy:directed="1"/>
      <edge id="29011" label="0101111001 (1) 0101111101" source="26994" target="26813" cy:directed="1"/>
      <edge id="29010" label="0101111001 (1) 0001111001" source="26994" target="27002" cy:directed="1"/>
      <edge id="29009" label="1010110110 (1) 1010110100" source="26993" target="27457" cy:directed="1"/>
      <edge id="29008" label="1010110110 (1) 1010110010" source="26993" target="27365" cy:directed="1"/>
      <edge id="29007" label="0010110110 (1) 0010110100" source="26992" target="27456" cy:directed="1"/>
      <edge id="29006" label="0010110110 (1) 0010110010" source="26992" target="27363" cy:directed="1"/>
      <edge id="29005" label="0000101001 (1) 0000101101" source="26991" target="26990" cy:directed="1"/>
      <edge id="29004" label="0000101001 (1) 0000100001" source="26991" target="27269" cy:directed="1"/>
      <edge id="29003" label="0000101001 (1) 0000111001" source="26991" target="27066" cy:directed="1"/>
      <edge id="29002" label="0000101001 (1) 0000001001" source="26991" target="27122" cy:directed="1"/>
      <edge id="29001" label="0000101001 (1) 0001101001" source="26991" target="26989" cy:directed="1"/>
      <edge id="29000" label="0000101001 (1) 0010101001" source="26991" target="26988" cy:directed="1"/>
      <edge id="28999" label="0000101101 (1) 0000100101" source="26990" target="27268" cy:directed="1"/>
      <edge id="28998" label="0000101101 (1) 0000111101" source="26990" target="26878" cy:directed="1"/>
      <edge id="28997" label="0000101101 (1) 0000001101" source="26990" target="27120" cy:directed="1"/>
      <edge id="28996" label="0000101101 (1) 0001101101" source="26990" target="26945" cy:directed="1"/>
      <edge id="28995" label="0000101101 (1) 0010101101" source="26990" target="26965" cy:directed="1"/>
      <edge id="28994" label="0001101001 (1) 0001101101" source="26989" target="26945" cy:directed="1"/>
      <edge id="28993" label="0001101001 (1) 0001100001" source="26989" target="27266" cy:directed="1"/>
      <edge id="28992" label="0001101001 (1) 0001111001" source="26989" target="27002" cy:directed="1"/>
      <edge id="28991" label="0001101001 (1) 0001001001" source="26989" target="27119" cy:directed="1"/>
      <edge id="28990" label="0001101001 (1) 0011101001" source="26989" target="26944" cy:directed="1"/>
      <edge id="28989" label="0010101001 (1) 0010101101" source="26988" target="26965" cy:directed="1"/>
      <edge id="28988" label="0010101001 (1) 0010100001" source="26988" target="27265" cy:directed="1"/>
      <edge id="28987" label="0010101001 (1) 0010111001" source="26988" target="27046" cy:directed="1"/>
      <edge id="28986" label="0010101001 (1) 0010001001" source="26988" target="27079" cy:directed="1"/>
      <edge id="28985" label="1000101001 (1) 1000101101" source="26987" target="26986" cy:directed="1"/>
      <edge id="28984" label="1000101001 (1) 1000100001" source="26987" target="27264" cy:directed="1"/>
      <edge id="28983" label="1000101001 (1) 1000111001" source="26987" target="27071" cy:directed="1"/>
      <edge id="28982" label="1000101001 (1) 1000001001" source="26987" target="27127" cy:directed="1"/>
      <edge id="28981" label="1000101001 (1) 1001101001" source="26987" target="26985" cy:directed="1"/>
      <edge id="28980" label="1000101001 (1) 1010101001" source="26987" target="26984" cy:directed="1"/>
      <edge id="28979" label="1000101001 (1) 1100101001" source="26987" target="26983" cy:directed="1"/>
      <edge id="28978" label="1000101101 (1) 1000100101" source="26986" target="27263" cy:directed="1"/>
      <edge id="28977" label="1000101101 (1) 1000111101" source="26986" target="26879" cy:directed="1"/>
      <edge id="28976" label="1000101101 (1) 1000001101" source="26986" target="27125" cy:directed="1"/>
      <edge id="28975" label="1000101101 (1) 1001101101" source="26986" target="26939" cy:directed="1"/>
      <edge id="28974" label="1000101101 (1) 1010101101" source="26986" target="26964" cy:directed="1"/>
      <edge id="28973" label="1000101101 (1) 1100101101" source="26986" target="26978" cy:directed="1"/>
      <edge id="28972" label="1001101001 (1) 1001101101" source="26985" target="26939" cy:directed="1"/>
      <edge id="28971" label="1001101001 (1) 1001100001" source="26985" target="27261" cy:directed="1"/>
      <edge id="28970" label="1001101001 (1) 1001111001" source="26985" target="27008" cy:directed="1"/>
      <edge id="28969" label="1001101001 (1) 1001001001" source="26985" target="27124" cy:directed="1"/>
      <edge id="28968" label="1001101001 (1) 1011101001" source="26985" target="26938" cy:directed="1"/>
      <edge id="28967" label="1001101001 (1) 1101101001" source="26985" target="27035" cy:directed="1"/>
      <edge id="28966" label="1010101001 (1) 1010101101" source="26984" target="26964" cy:directed="1"/>
      <edge id="28965" label="1010101001 (1) 1010100001" source="26984" target="27260" cy:directed="1"/>
      <edge id="28964" label="1010101001 (1) 1010111001" source="26984" target="27049" cy:directed="1"/>
      <edge id="28963" label="1010101001 (1) 1010001001" source="26984" target="27083" cy:directed="1"/>
      <edge id="28962" label="1010101001 (1) 1110101001" source="26984" target="26963" cy:directed="1"/>
      <edge id="28961" label="1100101001 (1) 1100101101" source="26983" target="26978" cy:directed="1"/>
      <edge id="28960" label="1100101001 (1) 1100100001" source="26983" target="27259" cy:directed="1"/>
      <edge id="28959" label="1100101001 (1) 1100111001" source="26983" target="27060" cy:directed="1"/>
      <edge id="28958" label="1100101001 (1) 1100001001" source="26983" target="27123" cy:directed="1"/>
      <edge id="28957" label="1100101001 (1) 1101101001" source="26983" target="27035" cy:directed="1"/>
      <edge id="28956" label="1110110110 (1) 1110110100" source="26982" target="27455" cy:directed="1"/>
      <edge id="28955" label="1110110110 (1) 1110110010" source="26982" target="27360" cy:directed="1"/>
      <edge id="28954" label="1110110110 (1) 1010110110" source="26982" target="26993" cy:directed="1"/>
      <edge id="28953" label="0110110110 (1) 0110110100" source="26981" target="27450" cy:directed="1"/>
      <edge id="28952" label="0110110110 (1) 0110110010" source="26981" target="27349" cy:directed="1"/>
      <edge id="28951" label="0110110110 (1) 0010110110" source="26981" target="26992" cy:directed="1"/>
      <edge id="28950" label="0010000111 (1) 0010100111" source="26980" target="26835" cy:directed="1"/>
      <edge id="28949" label="1010000111 (1) 1010100111" source="26979" target="26832" cy:directed="1"/>
      <edge id="28948" label="1010000111 (1) 1110000111" source="26979" target="26975" cy:directed="1"/>
      <edge id="28947" label="1100101101 (1) 1100100101" source="26978" target="27255" cy:directed="1"/>
      <edge id="28946" label="1100101101 (1) 1100111101" source="26978" target="26873" cy:directed="1"/>
      <edge id="28945" label="1100101101 (1) 1100001101" source="26978" target="27115" cy:directed="1"/>
      <edge id="28944" label="1100101101 (1) 1101101101" source="26978" target="26931" cy:directed="1"/>
      <edge id="28943" label="1100101101 (1) 1110101101" source="26978" target="26960" cy:directed="1"/>
      <edge id="28942" label="0100101001 (1) 0100101101" source="26977" target="26976" cy:directed="1"/>
      <edge id="28941" label="0100101001 (1) 0100100001" source="26977" target="27253" cy:directed="1"/>
      <edge id="28940" label="0100101001 (1) 0100111001" source="26977" target="27058" cy:directed="1"/>
      <edge id="28939" label="0100101001 (1) 0100001001" source="26977" target="27113" cy:directed="1"/>
      <edge id="28938" label="0100101001 (1) 0101101001" source="26977" target="27030" cy:directed="1"/>
      <edge id="28937" label="0100101001 (1) 0000101001" source="26977" target="26991" cy:directed="1"/>
      <edge id="28936" label="0100101101 (1) 0100100101" source="26976" target="27252" cy:directed="1"/>
      <edge id="28935" label="0100101101 (1) 0100111101" source="26976" target="26872" cy:directed="1"/>
      <edge id="28934" label="0100101101 (1) 0100001101" source="26976" target="27111" cy:directed="1"/>
      <edge id="28933" label="0100101101 (1) 0101101101" source="26976" target="26930" cy:directed="1"/>
      <edge id="28932" label="0100101101 (1) 0110101101" source="26976" target="26958" cy:directed="1"/>
      <edge id="28931" label="0100101101 (1) 0000101101" source="26976" target="26990" cy:directed="1"/>
      <edge id="28930" label="1110000111 (1) 1110100111" source="26975" target="26824" cy:directed="1"/>
      <edge id="28929" label="1110000111 (1) 1100000111" source="26975" target="27010" cy:directed="1"/>
      <edge id="28928" label="1011110101 (1) 1011111101" source="26974" target="26801" cy:directed="1"/>
      <edge id="28927" label="1011110101 (1) 1010110101" source="26974" target="27050" cy:directed="1"/>
      <edge id="28926" label="1011111001 (1) 1011111101" source="26973" target="26801" cy:directed="1"/>
      <edge id="28925" label="1011111001 (1) 1011011001" source="26973" target="27104" cy:directed="1"/>
      <edge id="28924" label="1011111001 (1) 1010111001" source="26973" target="27049" cy:directed="1"/>
      <edge id="28923" label="0110000111 (1) 0110100111" source="26972" target="26821" cy:directed="1"/>
      <edge id="28922" label="0110000111 (1) 0100000111" source="26972" target="27004" cy:directed="1"/>
      <edge id="28921" label="0110000111 (1) 0010000111" source="26972" target="26980" cy:directed="1"/>
      <edge id="28920" label="0011110101 (1) 0011111101" source="26971" target="26799" cy:directed="1"/>
      <edge id="28919" label="0011110101 (1) 0010110101" source="26971" target="27047" cy:directed="1"/>
      <edge id="28918" label="0011111001 (1) 0011111101" source="26970" target="26799" cy:directed="1"/>
      <edge id="28917" label="0011111001 (1) 0011011001" source="26970" target="27100" cy:directed="1"/>
      <edge id="28916" label="0011111001 (1) 0010111001" source="26970" target="27046" cy:directed="1"/>
      <edge id="28915" label="1111110101 (1) 1111111101" source="26969" target="26793" cy:directed="1"/>
      <edge id="28914" label="1111110101 (1) 1110110101" source="26969" target="27034" cy:directed="1"/>
      <edge id="28913" label="1111110101 (1) 1011110101" source="26969" target="26974" cy:directed="1"/>
      <edge id="28912" label="1111111001 (1) 1111111101" source="26968" target="26793" cy:directed="1"/>
      <edge id="28911" label="1111111001 (1) 1110111001" source="26968" target="27033" cy:directed="1"/>
      <edge id="28910" label="1111111001 (1) 1101111001" source="26968" target="26996" cy:directed="1"/>
      <edge id="28909" label="1111111001 (1) 1011111001" source="26968" target="26973" cy:directed="1"/>
      <edge id="28908" label="0111110101 (1) 0111111101" source="26967" target="26792" cy:directed="1"/>
      <edge id="28907" label="0111110101 (1) 0110110101" source="26967" target="27029" cy:directed="1"/>
      <edge id="28906" label="0111110101 (1) 0011110101" source="26967" target="26971" cy:directed="1"/>
      <edge id="28905" label="0111111001 (1) 0111111101" source="26966" target="26792" cy:directed="1"/>
      <edge id="28904" label="0111111001 (1) 0110111001" source="26966" target="27028" cy:directed="1"/>
      <edge id="28903" label="0111111001 (1) 0101111001" source="26966" target="26994" cy:directed="1"/>
      <edge id="28902" label="0111111001 (1) 0011111001" source="26966" target="26970" cy:directed="1"/>
      <edge id="28901" label="0010101101 (1) 0010100101" source="26965" target="27238" cy:directed="1"/>
      <edge id="28900" label="0010101101 (1) 0010111101" source="26965" target="26853" cy:directed="1"/>
      <edge id="28899" label="0010101101 (1) 0010001101" source="26965" target="27077" cy:directed="1"/>
      <edge id="28898" label="1010101101 (1) 1010100101" source="26964" target="27236" cy:directed="1"/>
      <edge id="28897" label="1010101101 (1) 1010111101" source="26964" target="26856" cy:directed="1"/>
      <edge id="28896" label="1010101101 (1) 1010001101" source="26964" target="27081" cy:directed="1"/>
      <edge id="28895" label="1010101101 (1) 1110101101" source="26964" target="26960" cy:directed="1"/>
      <edge id="28894" label="1110101001 (1) 1110101101" source="26963" target="26960" cy:directed="1"/>
      <edge id="28893" label="1110101001 (1) 1110100001" source="26963" target="27234" cy:directed="1"/>
      <edge id="28892" label="1110101001 (1) 1110111001" source="26963" target="27033" cy:directed="1"/>
      <edge id="28891" label="1110101001 (1) 1110001001" source="26963" target="27080" cy:directed="1"/>
      <edge id="28890" label="1110101001 (1) 1100101001" source="26963" target="26983" cy:directed="1"/>
      <edge id="28889" label="1001110110 (1) 1001110100" source="26962" target="27444" cy:directed="1"/>
      <edge id="28888" label="1001110110 (1) 1001110010" source="26962" target="27319" cy:directed="1"/>
      <edge id="28887" label="1001110110 (1) 1011110110" source="26962" target="26949" cy:directed="1"/>
      <edge id="28886" label="0001110110 (1) 0001110100" source="26961" target="27440" cy:directed="1"/>
      <edge id="28885" label="0001110110 (1) 0001110010" source="26961" target="27316" cy:directed="1"/>
      <edge id="28884" label="0001110110 (1) 0011110110" source="26961" target="26947" cy:directed="1"/>
      <edge id="28883" label="1110101101 (1) 1110100101" source="26960" target="27230" cy:directed="1"/>
      <edge id="28882" label="1110101101 (1) 1110111101" source="26960" target="26847" cy:directed="1"/>
      <edge id="28881" label="1110101101 (1) 1110001101" source="26960" target="27073" cy:directed="1"/>
      <edge id="28880" label="0110101001 (1) 0110101101" source="26959" target="26958" cy:directed="1"/>
      <edge id="28879" label="0110101001 (1) 0110100001" source="26959" target="27228" cy:directed="1"/>
      <edge id="28878" label="0110101001 (1) 0110111001" source="26959" target="27028" cy:directed="1"/>
      <edge id="28877" label="0110101001 (1) 0110001001" source="26959" target="27070" cy:directed="1"/>
      <edge id="28876" label="0110101001 (1) 0100101001" source="26959" target="26977" cy:directed="1"/>
      <edge id="28875" label="0110101001 (1) 0010101001" source="26959" target="26988" cy:directed="1"/>
      <edge id="28874" label="0110101101 (1) 0110100101" source="26958" target="27227" cy:directed="1"/>
      <edge id="28873" label="0110101101 (1) 0110111101" source="26958" target="26846" cy:directed="1"/>
      <edge id="28872" label="0110101101 (1) 0110001101" source="26958" target="27068" cy:directed="1"/>
      <edge id="28871" label="0110101101 (1) 0010101101" source="26958" target="26965" cy:directed="1"/>
      <edge id="28870" label="0001000111 (1) 0001100111" source="26957" target="26807" cy:directed="1"/>
      <edge id="28869" label="0001000111 (1) 0011000111" source="26957" target="26933" cy:directed="1"/>
      <edge id="28868" label="1101110110 (1) 1101110100" source="26956" target="27429" cy:directed="1"/>
      <edge id="28867" label="1101110110 (1) 1101110010" source="26956" target="27310" cy:directed="1"/>
      <edge id="28866" label="1101110110 (1) 1111110110" source="26956" target="26934" cy:directed="1"/>
      <edge id="28865" label="1101110110 (1) 1001110110" source="26956" target="26962" cy:directed="1"/>
      <edge id="28864" label="1001000111 (1) 1001100111" source="26955" target="26804" cy:directed="1"/>
      <edge id="28863" label="1001000111 (1) 1011000111" source="26955" target="26932" cy:directed="1"/>
      <edge id="28862" label="1001000111 (1) 1101000111" source="26955" target="26953" cy:directed="1"/>
      <edge id="28861" label="0101110110 (1) 0101110100" source="26954" target="27428" cy:directed="1"/>
      <edge id="28860" label="0101110110 (1) 0101110010" source="26954" target="27304" cy:directed="1"/>
      <edge id="28859" label="0101110110 (1) 0111110110" source="26954" target="26935" cy:directed="1"/>
      <edge id="28858" label="0101110110 (1) 0001110110" source="26954" target="26961" cy:directed="1"/>
      <edge id="28857" label="1101000111 (1) 1101100111" source="26953" target="26798" cy:directed="1"/>
      <edge id="28856" label="0101000111 (1) 0101100111" source="26952" target="26795" cy:directed="1"/>
      <edge id="28855" label="0101000111 (1) 0001000111" source="26952" target="26957" cy:directed="1"/>
      <edge id="28854" label="1000111110 (1) 1000111100" source="26951" target="27417" cy:directed="1"/>
      <edge id="28853" label="1000111110 (1) 1000110110" source="26951" target="27027" cy:directed="1"/>
      <edge id="28852" label="1000111110 (1) 1000011110" source="26951" target="27195" cy:directed="1"/>
      <edge id="28851" label="1000111110 (1) 1001111110" source="26951" target="26909" cy:directed="1"/>
      <edge id="28850" label="1000111110 (1) 1010111110" source="26951" target="26925" cy:directed="1"/>
      <edge id="28849" label="0000111110 (1) 0000111100" source="26950" target="27416" cy:directed="1"/>
      <edge id="28848" label="0000111110 (1) 0000110110" source="26950" target="27026" cy:directed="1"/>
      <edge id="28847" label="0000111110 (1) 0000011110" source="26950" target="27188" cy:directed="1"/>
      <edge id="28846" label="0000111110 (1) 0001111110" source="26950" target="26908" cy:directed="1"/>
      <edge id="28845" label="0000111110 (1) 0010111110" source="26950" target="26924" cy:directed="1"/>
      <edge id="28844" label="1011110110 (1) 1011110100" source="26949" target="27413" cy:directed="1"/>
      <edge id="28843" label="1011110110 (1) 1011110010" source="26949" target="27295" cy:directed="1"/>
      <edge id="28842" label="1011110110 (1) 1010110110" source="26949" target="26993" cy:directed="1"/>
      <edge id="28841" label="1100111110 (1) 1100111100" source="26948" target="27414" cy:directed="1"/>
      <edge id="28840" label="1100111110 (1) 1100110110" source="26948" target="27023" cy:directed="1"/>
      <edge id="28839" label="1100111110 (1) 1100011110" source="26948" target="27177" cy:directed="1"/>
      <edge id="28838" label="1100111110 (1) 1101111110" source="26948" target="26907" cy:directed="1"/>
      <edge id="28837" label="1100111110 (1) 1110111110" source="26948" target="26922" cy:directed="1"/>
      <edge id="28836" label="1100111110 (1) 1000111110" source="26948" target="26951" cy:directed="1"/>
      <edge id="28835" label="0011110110 (1) 0011110100" source="26947" target="27412" cy:directed="1"/>
      <edge id="28834" label="0011110110 (1) 0011110010" source="26947" target="27294" cy:directed="1"/>
      <edge id="28833" label="0011110110 (1) 0010110110" source="26947" target="26992" cy:directed="1"/>
      <edge id="28832" label="0100111110 (1) 0100111100" source="26946" target="27411" cy:directed="1"/>
      <edge id="28831" label="0100111110 (1) 0100110110" source="26946" target="27014" cy:directed="1"/>
      <edge id="28830" label="0100111110 (1) 0100011110" source="26946" target="27176" cy:directed="1"/>
      <edge id="28829" label="0100111110 (1) 0101111110" source="26946" target="26906" cy:directed="1"/>
      <edge id="28828" label="0100111110 (1) 0110111110" source="26946" target="26923" cy:directed="1"/>
      <edge id="28827" label="0100111110 (1) 0000111110" source="26946" target="26950" cy:directed="1"/>
      <edge id="28826" label="0001101101 (1) 0001100101" source="26945" target="27215" cy:directed="1"/>
      <edge id="28825" label="0001101101 (1) 0001111101" source="26945" target="26816" cy:directed="1"/>
      <edge id="28824" label="0001101101 (1) 0001001101" source="26945" target="27041" cy:directed="1"/>
      <edge id="28823" label="0001101101 (1) 0011101101" source="26945" target="26919" cy:directed="1"/>
      <edge id="28822" label="0011101001 (1) 0011101101" source="26944" target="26919" cy:directed="1"/>
      <edge id="28821" label="0011101001 (1) 0011100001" source="26944" target="27213" cy:directed="1"/>
      <edge id="28820" label="0011101001 (1) 0011111001" source="26944" target="26970" cy:directed="1"/>
      <edge id="28819" label="0011101001 (1) 0011001001" source="26944" target="27013" cy:directed="1"/>
      <edge id="28818" label="0011101001 (1) 0010101001" source="26944" target="26988" cy:directed="1"/>
      <edge id="28817" label="1000011011 (1) 1000011111" source="26943" target="26766" cy:directed="1"/>
      <edge id="28816" label="1000011011 (1) 1000010011" source="26943" target="27224" cy:directed="1"/>
      <edge id="28815" label="1000011011 (1) 1000001011" source="26943" target="27126" cy:directed="1"/>
      <edge id="28814" label="1000011011 (1) 1001011011" source="26943" target="26905" cy:directed="1"/>
      <edge id="28813" label="1000011101 (1) 1000011111" source="26942" target="26766" cy:directed="1"/>
      <edge id="28812" label="1000011101 (1) 1000001101" source="26942" target="27125" cy:directed="1"/>
      <edge id="28811" label="1000011101 (1) 1001011101" source="26942" target="26904" cy:directed="1"/>
      <edge id="28810" label="1000011101 (1) 1010011101" source="26942" target="26920" cy:directed="1"/>
      <edge id="28809" label="0000011011 (1) 0000011111" source="26941" target="26767" cy:directed="1"/>
      <edge id="28808" label="0000011011 (1) 0000010011" source="26941" target="27219" cy:directed="1"/>
      <edge id="28807" label="0000011011 (1) 0000001011" source="26941" target="27121" cy:directed="1"/>
      <edge id="28806" label="0000011011 (1) 0001011011" source="26941" target="26903" cy:directed="1"/>
      <edge id="28805" label="0000011101 (1) 0000011111" source="26940" target="26767" cy:directed="1"/>
      <edge id="28804" label="0000011101 (1) 0000001101" source="26940" target="27120" cy:directed="1"/>
      <edge id="28803" label="0000011101 (1) 0001011101" source="26940" target="26902" cy:directed="1"/>
      <edge id="28802" label="0000011101 (1) 0010011101" source="26940" target="26917" cy:directed="1"/>
      <edge id="28801" label="1001101101 (1) 1001100101" source="26939" target="27212" cy:directed="1"/>
      <edge id="28800" label="1001101101 (1) 1001111101" source="26939" target="26818" cy:directed="1"/>
      <edge id="28799" label="1001101101 (1) 1001001101" source="26939" target="27044" cy:directed="1"/>
      <edge id="28798" label="1001101101 (1) 1011101101" source="26939" target="26916" cy:directed="1"/>
      <edge id="28797" label="1001101101 (1) 1101101101" source="26939" target="26931" cy:directed="1"/>
      <edge id="28796" label="1011101001 (1) 1011101101" source="26938" target="26916" cy:directed="1"/>
      <edge id="28795" label="1011101001 (1) 1011100001" source="26938" target="27210" cy:directed="1"/>
      <edge id="28794" label="1011101001 (1) 1011111001" source="26938" target="26973" cy:directed="1"/>
      <edge id="28793" label="1011101001 (1) 1011001001" source="26938" target="27019" cy:directed="1"/>
      <edge id="28792" label="1011101001 (1) 1010101001" source="26938" target="26984" cy:directed="1"/>
      <edge id="28791" label="1011101001 (1) 1111101001" source="26938" target="27005" cy:directed="1"/>
      <edge id="28790" label="1100011011 (1) 1100011111" source="26937" target="26761" cy:directed="1"/>
      <edge id="28789" label="1100011011 (1) 1100010011" source="26937" target="27206" cy:directed="1"/>
      <edge id="28788" label="1100011011 (1) 1100001011" source="26937" target="27116" cy:directed="1"/>
      <edge id="28787" label="1100011011 (1) 1101011011" source="26937" target="26901" cy:directed="1"/>
      <edge id="28786" label="1100011011 (1) 1000011011" source="26937" target="26943" cy:directed="1"/>
      <edge id="28785" label="1100011101 (1) 1100011111" source="26936" target="26761" cy:directed="1"/>
      <edge id="28784" label="1100011101 (1) 1100001101" source="26936" target="27115" cy:directed="1"/>
      <edge id="28783" label="1100011101 (1) 1101011101" source="26936" target="26900" cy:directed="1"/>
      <edge id="28782" label="1100011101 (1) 1000011101" source="26936" target="26942" cy:directed="1"/>
      <edge id="28781" label="0111110110 (1) 0111110100" source="26935" target="27406" cy:directed="1"/>
      <edge id="28780" label="0111110110 (1) 0111110010" source="26935" target="27293" cy:directed="1"/>
      <edge id="28779" label="0111110110 (1) 0110110110" source="26935" target="26981" cy:directed="1"/>
      <edge id="28778" label="0111110110 (1) 0011110110" source="26935" target="26947" cy:directed="1"/>
      <edge id="28777" label="1111110110 (1) 1111110100" source="26934" target="27407" cy:directed="1"/>
      <edge id="28776" label="1111110110 (1) 1111110010" source="26934" target="27292" cy:directed="1"/>
      <edge id="28775" label="1111110110 (1) 1110110110" source="26934" target="26982" cy:directed="1"/>
      <edge id="28774" label="1111110110 (1) 1011110110" source="26934" target="26949" cy:directed="1"/>
      <edge id="28773" label="0011000111 (1) 0011100111" source="26933" target="26789" cy:directed="1"/>
      <edge id="28772" label="0011000111 (1) 0010000111" source="26933" target="26980" cy:directed="1"/>
      <edge id="28771" label="1011000111 (1) 1011100111" source="26932" target="26787" cy:directed="1"/>
      <edge id="28770" label="1011000111 (1) 1010000111" source="26932" target="26979" cy:directed="1"/>
      <edge id="28769" label="1011000111 (1) 1111000111" source="26932" target="26927" cy:directed="1"/>
      <edge id="28768" label="1101101101 (1) 1101100101" source="26931" target="27209" cy:directed="1"/>
      <edge id="28767" label="1101101101 (1) 1101111101" source="26931" target="26815" cy:directed="1"/>
      <edge id="28766" label="1101101101 (1) 1111101101" source="26931" target="26913" cy:directed="1"/>
      <edge id="28765" label="0101101101 (1) 0101100101" source="26930" target="27202" cy:directed="1"/>
      <edge id="28764" label="0101101101 (1) 0101111101" source="26930" target="26813" cy:directed="1"/>
      <edge id="28763" label="0101101101 (1) 0111101101" source="26930" target="26910" cy:directed="1"/>
      <edge id="28762" label="0101101101 (1) 0001101101" source="26930" target="26945" cy:directed="1"/>
      <edge id="28761" label="0100011011 (1) 0100011111" source="26929" target="26760" cy:directed="1"/>
      <edge id="28760" label="0100011011 (1) 0100010011" source="26929" target="27199" cy:directed="1"/>
      <edge id="28759" label="0100011011 (1) 0100001011" source="26929" target="27112" cy:directed="1"/>
      <edge id="28758" label="0100011011 (1) 0101011011" source="26929" target="26899" cy:directed="1"/>
      <edge id="28757" label="0100011011 (1) 0000011011" source="26929" target="26941" cy:directed="1"/>
      <edge id="28756" label="0100011101 (1) 0100011111" source="26928" target="26760" cy:directed="1"/>
      <edge id="28755" label="0100011101 (1) 0100001101" source="26928" target="27111" cy:directed="1"/>
      <edge id="28754" label="0100011101 (1) 0101011101" source="26928" target="26898" cy:directed="1"/>
      <edge id="28753" label="0100011101 (1) 0000011101" source="26928" target="26940" cy:directed="1"/>
      <edge id="28752" label="1111000111 (1) 1111100111" source="26927" target="26785" cy:directed="1"/>
      <edge id="28751" label="1111000111 (1) 1110000111" source="26927" target="26975" cy:directed="1"/>
      <edge id="28750" label="1111000111 (1) 1101000111" source="26927" target="26953" cy:directed="1"/>
      <edge id="28749" label="0111000111 (1) 0111100111" source="26926" target="26782" cy:directed="1"/>
      <edge id="28748" label="0111000111 (1) 0110000111" source="26926" target="26972" cy:directed="1"/>
      <edge id="28747" label="0111000111 (1) 0101000111" source="26926" target="26952" cy:directed="1"/>
      <edge id="28746" label="0111000111 (1) 0011000111" source="26926" target="26933" cy:directed="1"/>
      <edge id="28745" label="1010111110 (1) 1010111100" source="26925" target="27392" cy:directed="1"/>
      <edge id="28744" label="1010111110 (1) 1010110110" source="26925" target="26993" cy:directed="1"/>
      <edge id="28743" label="1010111110 (1) 1010011110" source="26925" target="27160" cy:directed="1"/>
      <edge id="28742" label="0010111110 (1) 0010111100" source="26924" target="27390" cy:directed="1"/>
      <edge id="28741" label="0010111110 (1) 0010110110" source="26924" target="26992" cy:directed="1"/>
      <edge id="28740" label="0010111110 (1) 0010011110" source="26924" target="27161" cy:directed="1"/>
      <edge id="28739" label="0110111110 (1) 0110111100" source="26923" target="27377" cy:directed="1"/>
      <edge id="28738" label="0110111110 (1) 0110110110" source="26923" target="26981" cy:directed="1"/>
      <edge id="28737" label="0110111110 (1) 0110011110" source="26923" target="27154" cy:directed="1"/>
      <edge id="28736" label="0110111110 (1) 0010111110" source="26923" target="26924" cy:directed="1"/>
      <edge id="28735" label="1110111110 (1) 1110111100" source="26922" target="27378" cy:directed="1"/>
      <edge id="28734" label="1110111110 (1) 1110110110" source="26922" target="26982" cy:directed="1"/>
      <edge id="28733" label="1110111110 (1) 1110011110" source="26922" target="27155" cy:directed="1"/>
      <edge id="28732" label="1110111110 (1) 1010111110" source="26922" target="26925" cy:directed="1"/>
      <edge id="28731" label="1010011011 (1) 1010011111" source="26921" target="26758" cy:directed="1"/>
      <edge id="28730" label="1010011011 (1) 1010010011" source="26921" target="27191" cy:directed="1"/>
      <edge id="28729" label="1010011011 (1) 1010001011" source="26921" target="27082" cy:directed="1"/>
      <edge id="28728" label="1010011011 (1) 1000011011" source="26921" target="26943" cy:directed="1"/>
      <edge id="28727" label="1010011101 (1) 1010011111" source="26920" target="26758" cy:directed="1"/>
      <edge id="28726" label="1010011101 (1) 1010001101" source="26920" target="27081" cy:directed="1"/>
      <edge id="28725" label="0011101101 (1) 0011100101" source="26919" target="27179" cy:directed="1"/>
      <edge id="28724" label="0011101101 (1) 0011111101" source="26919" target="26799" cy:directed="1"/>
      <edge id="28723" label="0011101101 (1) 0011001101" source="26919" target="27011" cy:directed="1"/>
      <edge id="28722" label="0011101101 (1) 0010101101" source="26919" target="26965" cy:directed="1"/>
      <edge id="28721" label="0010011011 (1) 0010011111" source="26918" target="26759" cy:directed="1"/>
      <edge id="28720" label="0010011011 (1) 0010010011" source="26918" target="27182" cy:directed="1"/>
      <edge id="28719" label="0010011011 (1) 0010001011" source="26918" target="27078" cy:directed="1"/>
      <edge id="28718" label="0010011011 (1) 0000011011" source="26918" target="26941" cy:directed="1"/>
      <edge id="28717" label="0010011101 (1) 0010011111" source="26917" target="26759" cy:directed="1"/>
      <edge id="28716" label="0010011101 (1) 0010001101" source="26917" target="27077" cy:directed="1"/>
      <edge id="28715" label="1011101101 (1) 1011100101" source="26916" target="27186" cy:directed="1"/>
      <edge id="28714" label="1011101101 (1) 1011111101" source="26916" target="26801" cy:directed="1"/>
      <edge id="28713" label="1011101101 (1) 1011001101" source="26916" target="27017" cy:directed="1"/>
      <edge id="28712" label="1011101101 (1) 1010101101" source="26916" target="26964" cy:directed="1"/>
      <edge id="28711" label="1011101101 (1) 1111101101" source="26916" target="26913" cy:directed="1"/>
      <edge id="28710" label="1110011011 (1) 1110011111" source="26915" target="26753" cy:directed="1"/>
      <edge id="28709" label="1110011011 (1) 1110010011" source="26915" target="27172" cy:directed="1"/>
      <edge id="28708" label="1110011011 (1) 1110001011" source="26915" target="27074" cy:directed="1"/>
      <edge id="28707" label="1110011011 (1) 1100011011" source="26915" target="26937" cy:directed="1"/>
      <edge id="28706" label="1110011011 (1) 1010011011" source="26915" target="26921" cy:directed="1"/>
      <edge id="28705" label="1110011101 (1) 1110011111" source="26914" target="26753" cy:directed="1"/>
      <edge id="28704" label="1110011101 (1) 1110001101" source="26914" target="27073" cy:directed="1"/>
      <edge id="28703" label="1110011101 (1) 1100011101" source="26914" target="26936" cy:directed="1"/>
      <edge id="28702" label="1110011101 (1) 1010011101" source="26914" target="26920" cy:directed="1"/>
      <edge id="28701" label="1111101101 (1) 1111100101" source="26913" target="27175" cy:directed="1"/>
      <edge id="28700" label="1111101101 (1) 1111111101" source="26913" target="26793" cy:directed="1"/>
      <edge id="28699" label="1111101101 (1) 1110101101" source="26913" target="26960" cy:directed="1"/>
      <edge id="28698" label="0110011011 (1) 0110011111" source="26912" target="26751" cy:directed="1"/>
      <edge id="28697" label="0110011011 (1) 0110010011" source="26912" target="27166" cy:directed="1"/>
      <edge id="28696" label="0110011011 (1) 0110001011" source="26912" target="27069" cy:directed="1"/>
      <edge id="28695" label="0110011011 (1) 0100011011" source="26912" target="26929" cy:directed="1"/>
      <edge id="28694" label="0110011011 (1) 0010011011" source="26912" target="26918" cy:directed="1"/>
      <edge id="28693" label="0110011101 (1) 0110011111" source="26911" target="26751" cy:directed="1"/>
      <edge id="28692" label="0110011101 (1) 0110001101" source="26911" target="27068" cy:directed="1"/>
      <edge id="28691" label="0110011101 (1) 0100011101" source="26911" target="26928" cy:directed="1"/>
      <edge id="28690" label="0110011101 (1) 0010011101" source="26911" target="26917" cy:directed="1"/>
      <edge id="28689" label="0111101101 (1) 0111100101" source="26910" target="27169" cy:directed="1"/>
      <edge id="28688" label="0111101101 (1) 0111111101" source="26910" target="26792" cy:directed="1"/>
      <edge id="28687" label="0111101101 (1) 0110101101" source="26910" target="26958" cy:directed="1"/>
      <edge id="28686" label="0111101101 (1) 0011101101" source="26910" target="26919" cy:directed="1"/>
      <edge id="28685" label="1001111110 (1) 1001111100" source="26909" target="27341" cy:directed="1"/>
      <edge id="28684" label="1001111110 (1) 1001110110" source="26909" target="26962" cy:directed="1"/>
      <edge id="28683" label="1001111110 (1) 1001011110" source="26909" target="27109" cy:directed="1"/>
      <edge id="28682" label="1001111110 (1) 1011111110" source="26909" target="26897" cy:directed="1"/>
      <edge id="28681" label="0001111110 (1) 0001111100" source="26908" target="27338" cy:directed="1"/>
      <edge id="28680" label="0001111110 (1) 0001110110" source="26908" target="26961" cy:directed="1"/>
      <edge id="28679" label="0001111110 (1) 0001011110" source="26908" target="27108" cy:directed="1"/>
      <edge id="28678" label="0001111110 (1) 0011111110" source="26908" target="26896" cy:directed="1"/>
      <edge id="28677" label="1101111110 (1) 1101111100" source="26907" target="27329" cy:directed="1"/>
      <edge id="28676" label="1101111110 (1) 1101110110" source="26907" target="26956" cy:directed="1"/>
      <edge id="28675" label="1101111110 (1) 1111111110" source="26907" target="26895" cy:directed="1"/>
      <edge id="28674" label="1101111110 (1) 1001111110" source="26907" target="26909" cy:directed="1"/>
      <edge id="28673" label="0101111110 (1) 0101111100" source="26906" target="27328" cy:directed="1"/>
      <edge id="28672" label="0101111110 (1) 0101110110" source="26906" target="26954" cy:directed="1"/>
      <edge id="28671" label="0101111110 (1) 0111111110" source="26906" target="26894" cy:directed="1"/>
      <edge id="28670" label="0101111110 (1) 0001111110" source="26906" target="26908" cy:directed="1"/>
      <edge id="28669" label="1001011011 (1) 1001011111" source="26905" target="26730" cy:directed="1"/>
      <edge id="28668" label="1001011011 (1) 1001010011" source="26905" target="27153" cy:directed="1"/>
      <edge id="28667" label="1001011011 (1) 1001001011" source="26905" target="27045" cy:directed="1"/>
      <edge id="28666" label="1001011101 (1) 1001011111" source="26904" target="26730" cy:directed="1"/>
      <edge id="28665" label="1001011101 (1) 1001001101" source="26904" target="27044" cy:directed="1"/>
      <edge id="28664" label="1001011101 (1) 1011011101" source="26904" target="26887" cy:directed="1"/>
      <edge id="28663" label="0001011011 (1) 0001011111" source="26903" target="26731" cy:directed="1"/>
      <edge id="28662" label="0001011011 (1) 0001010011" source="26903" target="27150" cy:directed="1"/>
      <edge id="28661" label="0001011011 (1) 0001001011" source="26903" target="27042" cy:directed="1"/>
      <edge id="28660" label="0001011101 (1) 0001011111" source="26902" target="26731" cy:directed="1"/>
      <edge id="28659" label="0001011101 (1) 0001001101" source="26902" target="27041" cy:directed="1"/>
      <edge id="28658" label="0001011101 (1) 0011011101" source="26902" target="26891" cy:directed="1"/>
      <edge id="28657" label="1101011011 (1) 1101011111" source="26901" target="26727" cy:directed="1"/>
      <edge id="28656" label="1101011011 (1) 1101010011" source="26901" target="27138" cy:directed="1"/>
      <edge id="28655" label="1101011011 (1) 1101001011" source="26901" target="27037" cy:directed="1"/>
      <edge id="28654" label="1101011011 (1) 1101111011" source="26901" target="26704" cy:directed="1"/>
      <edge id="28653" label="1101011011 (1) 1001011011" source="26901" target="26905" cy:directed="1"/>
      <edge id="28652" label="1101011101 (1) 1101011111" source="26900" target="26727" cy:directed="1"/>
      <edge id="28651" label="1101011101 (1) 1101001101" source="26900" target="27036" cy:directed="1"/>
      <edge id="28650" label="1101011101 (1) 1101111101" source="26900" target="26815" cy:directed="1"/>
      <edge id="28649" label="1101011101 (1) 1001011101" source="26900" target="26904" cy:directed="1"/>
      <edge id="28648" label="0101011011 (1) 0101011111" source="26899" target="26726" cy:directed="1"/>
      <edge id="28647" label="0101011011 (1) 0101010011" source="26899" target="27135" cy:directed="1"/>
      <edge id="28646" label="0101011011 (1) 0101001011" source="26899" target="27032" cy:directed="1"/>
      <edge id="28645" label="0101011011 (1) 0101111011" source="26899" target="26702" cy:directed="1"/>
      <edge id="28644" label="0101011011 (1) 0001011011" source="26899" target="26903" cy:directed="1"/>
      <edge id="28643" label="0101011101 (1) 0101011111" source="26898" target="26726" cy:directed="1"/>
      <edge id="28642" label="0101011101 (1) 0101001101" source="26898" target="27031" cy:directed="1"/>
      <edge id="28641" label="0101011101 (1) 0101111101" source="26898" target="26813" cy:directed="1"/>
      <edge id="28640" label="0101011101 (1) 0001011101" source="26898" target="26902" cy:directed="1"/>
      <edge id="28639" label="1011111110 (1) 1011111100" source="26897" target="27306" cy:directed="1"/>
      <edge id="28638" label="1011111110 (1) 1011110110" source="26897" target="26949" cy:directed="1"/>
      <edge id="28637" label="1011111110 (1) 1011011110" source="26897" target="27065" cy:directed="1"/>
      <edge id="28636" label="1011111110 (1) 1010111110" source="26897" target="26925" cy:directed="1"/>
      <edge id="28635" label="0011111110 (1) 0011111100" source="26896" target="27309" cy:directed="1"/>
      <edge id="28634" label="0011111110 (1) 0011110110" source="26896" target="26947" cy:directed="1"/>
      <edge id="28633" label="0011111110 (1) 0011011110" source="26896" target="27063" cy:directed="1"/>
      <edge id="28632" label="0011111110 (1) 0010111110" source="26896" target="26924" cy:directed="1"/>
      <edge id="28631" label="1111111110 (1) 1111111100" source="26895" target="27303" cy:directed="1"/>
      <edge id="28630" label="1111111110 (1) 1111110110" source="26895" target="26934" cy:directed="1"/>
      <edge id="28629" label="1111111110 (1) 1110111110" source="26895" target="26922" cy:directed="1"/>
      <edge id="28628" label="1111111110 (1) 1011111110" source="26895" target="26897" cy:directed="1"/>
      <edge id="28627" label="0111111110 (1) 0111111100" source="26894" target="27302" cy:directed="1"/>
      <edge id="28626" label="0111111110 (1) 0111110110" source="26894" target="26935" cy:directed="1"/>
      <edge id="28625" label="0111111110 (1) 0110111110" source="26894" target="26923" cy:directed="1"/>
      <edge id="28624" label="0111111110 (1) 0011111110" source="26894" target="26896" cy:directed="1"/>
      <edge id="28623" label="1000010111 (1) 1000000111" source="26893" target="27021" cy:directed="1"/>
      <edge id="28622" label="1000010111 (1) 1000110111" source="26893" target="26773" cy:directed="1"/>
      <edge id="28621" label="1000010111 (1) 1001010111" source="26893" target="26845" cy:directed="1"/>
      <edge id="28620" label="1000010111 (1) 1010010111" source="26893" target="26877" cy:directed="1"/>
      <edge id="28619" label="0011011011 (1) 0011011111" source="26892" target="26715" cy:directed="1"/>
      <edge id="28618" label="0011011011 (1) 0011010011" source="26892" target="27102" cy:directed="1"/>
      <edge id="28617" label="0011011011 (1) 0011001011" source="26892" target="27012" cy:directed="1"/>
      <edge id="28616" label="0011011011 (1) 0010011011" source="26892" target="26918" cy:directed="1"/>
      <edge id="28615" label="0011011011 (1) 0001011011" source="26892" target="26903" cy:directed="1"/>
      <edge id="28614" label="0011011101 (1) 0011011111" source="26891" target="26715" cy:directed="1"/>
      <edge id="28613" label="0011011101 (1) 0011001101" source="26891" target="27011" cy:directed="1"/>
      <edge id="28612" label="0011011101 (1) 0010011101" source="26891" target="26917" cy:directed="1"/>
      <edge id="28611" label="0000010111 (1) 0000000111" source="26890" target="27015" cy:directed="1"/>
      <edge id="28610" label="0000010111 (1) 0000110111" source="26890" target="26772" cy:directed="1"/>
      <edge id="28609" label="0000010111 (1) 0001010111" source="26890" target="26844" cy:directed="1"/>
      <edge id="28608" label="0000010111 (1) 0010010111" source="26890" target="26871" cy:directed="1"/>
      <edge id="28607" label="0101100011 (1) 0101100001" source="26889" target="27296" cy:directed="1"/>
      <edge id="28606" label="0101100011 (1) 0101100111" source="26889" target="26795" cy:directed="1"/>
      <edge id="28605" label="0101100011 (1) 0101110011" source="26889" target="26794" cy:directed="1"/>
      <edge id="28604" label="0101100011 (1) 0001100011" source="26889" target="26864" cy:directed="1"/>
      <edge id="28603" label="1011011011 (1) 1011011111" source="26888" target="26714" cy:directed="1"/>
      <edge id="28602" label="1011011011 (1) 1011010011" source="26888" target="27106" cy:directed="1"/>
      <edge id="28601" label="1011011011 (1) 1011001011" source="26888" target="27018" cy:directed="1"/>
      <edge id="28600" label="1011011011 (1) 1010011011" source="26888" target="26921" cy:directed="1"/>
      <edge id="28599" label="1011011011 (1) 1001011011" source="26888" target="26905" cy:directed="1"/>
      <edge id="28598" label="1011011101 (1) 1011011111" source="26887" target="26714" cy:directed="1"/>
      <edge id="28597" label="1011011101 (1) 1011001101" source="26887" target="27017" cy:directed="1"/>
      <edge id="28596" label="1011011101 (1) 1010011101" source="26887" target="26920" cy:directed="1"/>
      <edge id="28595" label="1101100011 (1) 1101100001" source="26886" target="27299" cy:directed="1"/>
      <edge id="28594" label="1101100011 (1) 1101100111" source="26886" target="26798" cy:directed="1"/>
      <edge id="28593" label="1101100011 (1) 1101110011" source="26886" target="26797" cy:directed="1"/>
      <edge id="28592" label="1100010111 (1) 1100000111" source="26885" target="27010" cy:directed="1"/>
      <edge id="28591" label="1100010111 (1) 1100110111" source="26885" target="26771" cy:directed="1"/>
      <edge id="28590" label="1100010111 (1) 1101010111" source="26885" target="26836" cy:directed="1"/>
      <edge id="28589" label="1100010111 (1) 1000010111" source="26885" target="26893" cy:directed="1"/>
      <edge id="28588" label="0100010111 (1) 0100000111" source="26884" target="27004" cy:directed="1"/>
      <edge id="28587" label="0100010111 (1) 0100110111" source="26884" target="26770" cy:directed="1"/>
      <edge id="28586" label="0100010111 (1) 0101010111" source="26884" target="26833" cy:directed="1"/>
      <edge id="28585" label="0100010111 (1) 0000010111" source="26884" target="26890" cy:directed="1"/>
      <edge id="28584" label="0111011011 (1) 0111011111" source="26883" target="26713" cy:directed="1"/>
      <edge id="28583" label="0111011011 (1) 0111010011" source="26883" target="27093" cy:directed="1"/>
      <edge id="28582" label="0111011011 (1) 0111001011" source="26883" target="27000" cy:directed="1"/>
      <edge id="28581" label="0111011011 (1) 0111111011" source="26883" target="26694" cy:directed="1"/>
      <edge id="28580" label="0111011011 (1) 0110011011" source="26883" target="26912" cy:directed="1"/>
      <edge id="28579" label="0111011011 (1) 0101011011" source="26883" target="26899" cy:directed="1"/>
      <edge id="28578" label="0111011011 (1) 0011011011" source="26883" target="26892" cy:directed="1"/>
      <edge id="28577" label="0111011101 (1) 0111011111" source="26882" target="26713" cy:directed="1"/>
      <edge id="28576" label="0111011101 (1) 0111001101" source="26882" target="26999" cy:directed="1"/>
      <edge id="28575" label="0111011101 (1) 0111111101" source="26882" target="26792" cy:directed="1"/>
      <edge id="28574" label="0111011101 (1) 0110011101" source="26882" target="26911" cy:directed="1"/>
      <edge id="28573" label="0111011101 (1) 0101011101" source="26882" target="26898" cy:directed="1"/>
      <edge id="28572" label="0111011101 (1) 0011011101" source="26882" target="26891" cy:directed="1"/>
      <edge id="28571" label="1111011011 (1) 1111011111" source="26881" target="26712" cy:directed="1"/>
      <edge id="28570" label="1111011011 (1) 1111010011" source="26881" target="27089" cy:directed="1"/>
      <edge id="28569" label="1111011011 (1) 1111001011" source="26881" target="27007" cy:directed="1"/>
      <edge id="28568" label="1111011011 (1) 1111111011" source="26881" target="26696" cy:directed="1"/>
      <edge id="28567" label="1111011011 (1) 1110011011" source="26881" target="26915" cy:directed="1"/>
      <edge id="28566" label="1111011011 (1) 1101011011" source="26881" target="26901" cy:directed="1"/>
      <edge id="28565" label="1111011011 (1) 1011011011" source="26881" target="26888" cy:directed="1"/>
      <edge id="28564" label="1111011101 (1) 1111011111" source="26880" target="26712" cy:directed="1"/>
      <edge id="28563" label="1111011101 (1) 1111001101" source="26880" target="27006" cy:directed="1"/>
      <edge id="28562" label="1111011101 (1) 1111111101" source="26880" target="26793" cy:directed="1"/>
      <edge id="28561" label="1111011101 (1) 1110011101" source="26880" target="26914" cy:directed="1"/>
      <edge id="28560" label="1111011101 (1) 1101011101" source="26880" target="26900" cy:directed="1"/>
      <edge id="28559" label="1111011101 (1) 1011011101" source="26880" target="26887" cy:directed="1"/>
      <edge id="28558" label="1000111101 (1) 1000011101" source="26879" target="26942" cy:directed="1"/>
      <edge id="28557" label="1000111101 (1) 1001111101" source="26879" target="26818" cy:directed="1"/>
      <edge id="28556" label="1000111101 (1) 1010111101" source="26879" target="26856" cy:directed="1"/>
      <edge id="28555" label="0000111101 (1) 0000011101" source="26878" target="26940" cy:directed="1"/>
      <edge id="28554" label="0000111101 (1) 0001111101" source="26878" target="26816" cy:directed="1"/>
      <edge id="28553" label="0000111101 (1) 0010111101" source="26878" target="26853" cy:directed="1"/>
      <edge id="28552" label="1010010111 (1) 1010000111" source="26877" target="26979" cy:directed="1"/>
      <edge id="28551" label="1010010111 (1) 1010110111" source="26877" target="26769" cy:directed="1"/>
      <edge id="28550" label="1101101110 (1) 1101101100" source="26876" target="27279" cy:directed="1"/>
      <edge id="28549" label="1101101110 (1) 1101101010" source="26876" target="27194" cy:directed="1"/>
      <edge id="28548" label="1101101110 (1) 1101100110" source="26876" target="27064" cy:directed="1"/>
      <edge id="28547" label="1101101110 (1) 1101111110" source="26876" target="26907" cy:directed="1"/>
      <edge id="28546" label="1101101110 (1) 1111101110" source="26876" target="26849" cy:directed="1"/>
      <edge id="28545" label="0101101110 (1) 0101101100" source="26875" target="27277" cy:directed="1"/>
      <edge id="28544" label="0101101110 (1) 0101101010" source="26875" target="27187" cy:directed="1"/>
      <edge id="28543" label="0101101110 (1) 0101100110" source="26875" target="27062" cy:directed="1"/>
      <edge id="28542" label="0101101110 (1) 0101111110" source="26875" target="26906" cy:directed="1"/>
      <edge id="28541" label="0101101110 (1) 0111101110" source="26875" target="26848" cy:directed="1"/>
      <edge id="28540" label="0101101110 (1) 0001101110" source="26875" target="26842" cy:directed="1"/>
      <edge id="28539" label="0111100011 (1) 0111100001" source="26874" target="27270" cy:directed="1"/>
      <edge id="28538" label="0111100011 (1) 0111100111" source="26874" target="26782" cy:directed="1"/>
      <edge id="28537" label="0111100011 (1) 0111110011" source="26874" target="26781" cy:directed="1"/>
      <edge id="28536" label="0111100011 (1) 0110100011" source="26874" target="26822" cy:directed="1"/>
      <edge id="28535" label="0111100011 (1) 0101100011" source="26874" target="26889" cy:directed="1"/>
      <edge id="28534" label="0111100011 (1) 0011100011" source="26874" target="26805" cy:directed="1"/>
      <edge id="28533" label="1100111101 (1) 1100011101" source="26873" target="26936" cy:directed="1"/>
      <edge id="28532" label="1100111101 (1) 1101111101" source="26873" target="26815" cy:directed="1"/>
      <edge id="28531" label="1100111101 (1) 1110111101" source="26873" target="26847" cy:directed="1"/>
      <edge id="28530" label="1100111101 (1) 1000111101" source="26873" target="26879" cy:directed="1"/>
      <edge id="28529" label="0100111101 (1) 0100011101" source="26872" target="26928" cy:directed="1"/>
      <edge id="28528" label="0100111101 (1) 0101111101" source="26872" target="26813" cy:directed="1"/>
      <edge id="28527" label="0100111101 (1) 0110111101" source="26872" target="26846" cy:directed="1"/>
      <edge id="28526" label="0100111101 (1) 0000111101" source="26872" target="26878" cy:directed="1"/>
      <edge id="28525" label="0010010111 (1) 0010000111" source="26871" target="26980" cy:directed="1"/>
      <edge id="28524" label="0010010111 (1) 0010110111" source="26871" target="26768" cy:directed="1"/>
      <edge id="28523" label="1111100011 (1) 1111100001" source="26870" target="27274" cy:directed="1"/>
      <edge id="28522" label="1111100011 (1) 1111100111" source="26870" target="26785" cy:directed="1"/>
      <edge id="28521" label="1111100011 (1) 1111110011" source="26870" target="26784" cy:directed="1"/>
      <edge id="28520" label="1111100011 (1) 1110100011" source="26870" target="26830" cy:directed="1"/>
      <edge id="28519" label="1111100011 (1) 1101100011" source="26870" target="26886" cy:directed="1"/>
      <edge id="28518" label="1110010111 (1) 1110000111" source="26869" target="26975" cy:directed="1"/>
      <edge id="28517" label="1110010111 (1) 1110110111" source="26869" target="26764" cy:directed="1"/>
      <edge id="28516" label="1110010111 (1) 1100010111" source="26869" target="26885" cy:directed="1"/>
      <edge id="28515" label="1110010111 (1) 1010010111" source="26869" target="26877" cy:directed="1"/>
      <edge id="28514" label="0110010111 (1) 0110000111" source="26868" target="26972" cy:directed="1"/>
      <edge id="28513" label="0110010111 (1) 0110110111" source="26868" target="26763" cy:directed="1"/>
      <edge id="28512" label="0110010111 (1) 0100010111" source="26868" target="26884" cy:directed="1"/>
      <edge id="28511" label="0110010111 (1) 0010010111" source="26868" target="26871" cy:directed="1"/>
      <edge id="28510" label="0000100011 (1) 0000100001" source="26867" target="27269" cy:directed="1"/>
      <edge id="28509" label="0000100011 (1) 0000100111" source="26867" target="26866" cy:directed="1"/>
      <edge id="28508" label="0000100011 (1) 0000110011" source="26867" target="26865" cy:directed="1"/>
      <edge id="28507" label="0000100011 (1) 0000000011" source="26867" target="27386" cy:directed="1"/>
      <edge id="28506" label="0000100011 (1) 0001100011" source="26867" target="26864" cy:directed="1"/>
      <edge id="28505" label="0000100011 (1) 0010100011" source="26867" target="26863" cy:directed="1"/>
      <edge id="28504" label="0000100111 (1) 0000100101" source="26866" target="27268" cy:directed="1"/>
      <edge id="28503" label="0000100111 (1) 0000110111" source="26866" target="26772" cy:directed="1"/>
      <edge id="28502" label="0000100111 (1) 0001100111" source="26866" target="26807" cy:directed="1"/>
      <edge id="28501" label="0000100111 (1) 0010100111" source="26866" target="26835" cy:directed="1"/>
      <edge id="28500" label="0000110011 (1) 0000110001" source="26865" target="27267" cy:directed="1"/>
      <edge id="28499" label="0000110011 (1) 0000110111" source="26865" target="26772" cy:directed="1"/>
      <edge id="28498" label="0000110011 (1) 0000010011" source="26865" target="27219" cy:directed="1"/>
      <edge id="28497" label="0000110011 (1) 0001110011" source="26865" target="26806" cy:directed="1"/>
      <edge id="28496" label="0000110011 (1) 0010110011" source="26865" target="26834" cy:directed="1"/>
      <edge id="28495" label="0001100011 (1) 0001100001" source="26864" target="27266" cy:directed="1"/>
      <edge id="28494" label="0001100011 (1) 0001100111" source="26864" target="26807" cy:directed="1"/>
      <edge id="28493" label="0001100011 (1) 0001110011" source="26864" target="26806" cy:directed="1"/>
      <edge id="28492" label="0001100011 (1) 0001000011" source="26864" target="27312" cy:directed="1"/>
      <edge id="28491" label="0001100011 (1) 0011100011" source="26864" target="26805" cy:directed="1"/>
      <edge id="28490" label="0010100011 (1) 0010100001" source="26863" target="27265" cy:directed="1"/>
      <edge id="28489" label="0010100011 (1) 0010100111" source="26863" target="26835" cy:directed="1"/>
      <edge id="28488" label="0010100011 (1) 0010110011" source="26863" target="26834" cy:directed="1"/>
      <edge id="28487" label="0010100011 (1) 0010000011" source="26863" target="27343" cy:directed="1"/>
      <edge id="28486" label="1000100011 (1) 1000100001" source="26862" target="27264" cy:directed="1"/>
      <edge id="28485" label="1000100011 (1) 1000100111" source="26862" target="26861" cy:directed="1"/>
      <edge id="28484" label="1000100011 (1) 1000110011" source="26862" target="26860" cy:directed="1"/>
      <edge id="28483" label="1000100011 (1) 1000000011" source="26862" target="27382" cy:directed="1"/>
      <edge id="28482" label="1000100011 (1) 1001100011" source="26862" target="26859" cy:directed="1"/>
      <edge id="28481" label="1000100011 (1) 1010100011" source="26862" target="26858" cy:directed="1"/>
      <edge id="28480" label="1000100011 (1) 1100100011" source="26862" target="26857" cy:directed="1"/>
      <edge id="28479" label="1000100111 (1) 1000100101" source="26861" target="27263" cy:directed="1"/>
      <edge id="28478" label="1000100111 (1) 1000110111" source="26861" target="26773" cy:directed="1"/>
      <edge id="28477" label="1000100111 (1) 1001100111" source="26861" target="26804" cy:directed="1"/>
      <edge id="28476" label="1000100111 (1) 1010100111" source="26861" target="26832" cy:directed="1"/>
      <edge id="28475" label="1000100111 (1) 1100100111" source="26861" target="26855" cy:directed="1"/>
      <edge id="28474" label="1000110011 (1) 1000110001" source="26860" target="27262" cy:directed="1"/>
      <edge id="28473" label="1000110011 (1) 1000110111" source="26860" target="26773" cy:directed="1"/>
      <edge id="28472" label="1000110011 (1) 1000010011" source="26860" target="27224" cy:directed="1"/>
      <edge id="28471" label="1000110011 (1) 1001110011" source="26860" target="26803" cy:directed="1"/>
      <edge id="28470" label="1000110011 (1) 1010110011" source="26860" target="26831" cy:directed="1"/>
      <edge id="28469" label="1001100011 (1) 1001100001" source="26859" target="27261" cy:directed="1"/>
      <edge id="28468" label="1001100011 (1) 1001100111" source="26859" target="26804" cy:directed="1"/>
      <edge id="28467" label="1001100011 (1) 1001110011" source="26859" target="26803" cy:directed="1"/>
      <edge id="28466" label="1001100011 (1) 1001000011" source="26859" target="27308" cy:directed="1"/>
      <edge id="28465" label="1001100011 (1) 1011100011" source="26859" target="26802" cy:directed="1"/>
      <edge id="28464" label="1001100011 (1) 1101100011" source="26859" target="26886" cy:directed="1"/>
      <edge id="28463" label="1010100011 (1) 1010100001" source="26858" target="27260" cy:directed="1"/>
      <edge id="28462" label="1010100011 (1) 1010100111" source="26858" target="26832" cy:directed="1"/>
      <edge id="28461" label="1010100011 (1) 1010110011" source="26858" target="26831" cy:directed="1"/>
      <edge id="28460" label="1010100011 (1) 1010000011" source="26858" target="27347" cy:directed="1"/>
      <edge id="28459" label="1010100011 (1) 1110100011" source="26858" target="26830" cy:directed="1"/>
      <edge id="28458" label="1100100011 (1) 1100100001" source="26857" target="27259" cy:directed="1"/>
      <edge id="28457" label="1100100011 (1) 1100100111" source="26857" target="26855" cy:directed="1"/>
      <edge id="28456" label="1100100011 (1) 1100110011" source="26857" target="26854" cy:directed="1"/>
      <edge id="28455" label="1100100011 (1) 1100000011" source="26857" target="27376" cy:directed="1"/>
      <edge id="28454" label="1100100011 (1) 1101100011" source="26857" target="26886" cy:directed="1"/>
      <edge id="28453" label="1010111101 (1) 1010011101" source="26856" target="26920" cy:directed="1"/>
      <edge id="28452" label="1100100111 (1) 1100100101" source="26855" target="27255" cy:directed="1"/>
      <edge id="28451" label="1100100111 (1) 1100110111" source="26855" target="26771" cy:directed="1"/>
      <edge id="28450" label="1100100111 (1) 1101100111" source="26855" target="26798" cy:directed="1"/>
      <edge id="28449" label="1100100111 (1) 1110100111" source="26855" target="26824" cy:directed="1"/>
      <edge id="28448" label="1100110011 (1) 1100110001" source="26854" target="27254" cy:directed="1"/>
      <edge id="28447" label="1100110011 (1) 1100110111" source="26854" target="26771" cy:directed="1"/>
      <edge id="28446" label="1100110011 (1) 1100010011" source="26854" target="27206" cy:directed="1"/>
      <edge id="28445" label="1100110011 (1) 1101110011" source="26854" target="26797" cy:directed="1"/>
      <edge id="28444" label="1100110011 (1) 1000110011" source="26854" target="26860" cy:directed="1"/>
      <edge id="28443" label="0010111101 (1) 0010011101" source="26853" target="26917" cy:directed="1"/>
      <edge id="28442" label="0100100011 (1) 0100100001" source="26852" target="27253" cy:directed="1"/>
      <edge id="28441" label="0100100011 (1) 0100100111" source="26852" target="26851" cy:directed="1"/>
      <edge id="28440" label="0100100011 (1) 0100110011" source="26852" target="26850" cy:directed="1"/>
      <edge id="28439" label="0100100011 (1) 0100000011" source="26852" target="27372" cy:directed="1"/>
      <edge id="28438" label="0100100011 (1) 0101100011" source="26852" target="26889" cy:directed="1"/>
      <edge id="28437" label="0100100011 (1) 0000100011" source="26852" target="26867" cy:directed="1"/>
      <edge id="28436" label="0100100111 (1) 0100100101" source="26851" target="27252" cy:directed="1"/>
      <edge id="28435" label="0100100111 (1) 0100110111" source="26851" target="26770" cy:directed="1"/>
      <edge id="28434" label="0100100111 (1) 0101100111" source="26851" target="26795" cy:directed="1"/>
      <edge id="28433" label="0100100111 (1) 0110100111" source="26851" target="26821" cy:directed="1"/>
      <edge id="28432" label="0100100111 (1) 0000100111" source="26851" target="26866" cy:directed="1"/>
      <edge id="28431" label="0100110011 (1) 0100110001" source="26850" target="27251" cy:directed="1"/>
      <edge id="28430" label="0100110011 (1) 0100110111" source="26850" target="26770" cy:directed="1"/>
      <edge id="28429" label="0100110011 (1) 0100010011" source="26850" target="27199" cy:directed="1"/>
      <edge id="28428" label="0100110011 (1) 0101110011" source="26850" target="26794" cy:directed="1"/>
      <edge id="28427" label="0100110011 (1) 0000110011" source="26850" target="26865" cy:directed="1"/>
      <edge id="28426" label="1111101110 (1) 1111101100" source="26849" target="27249" cy:directed="1"/>
      <edge id="28425" label="1111101110 (1) 1111101010" source="26849" target="27157" cy:directed="1"/>
      <edge id="28424" label="1111101110 (1) 1111100110" source="26849" target="27039" cy:directed="1"/>
      <edge id="28423" label="1111101110 (1) 1111111110" source="26849" target="26895" cy:directed="1"/>
      <edge id="28422" label="1111101110 (1) 1110101110" source="26849" target="26829" cy:directed="1"/>
[truncated: 75,632 more chars]
