# Supplementary material
Source: publisher figshare collection journal article supplement (https://springernature.figshare.com/ndownloader/files/17562821)
Supplement: Supplementary file 1 [file 17562821 › CytoscapeSession-2018_09_25-21_15/networks/37956-STG%2C+Model+1.xgmml]

<?xml version="1.0" encoding="UTF-8" standalone="yes"?>
<graph id="37956" label="STG, Model 1" cy:view="0" cy:registered="0" cy:documentVersion="3.0" xmlns:dc="http://purl.org/dc/elements/1.1/" xmlns:xlink="http://www.w3.org/1999/xlink" xmlns:rdf="http://www.w3.org/1999/02/22-rdf-syntax-ns#" xmlns:cy="http://www.cytoscape.org" xmlns="http://www.cs.rpi.edu/XGMML">
  <att>
    <graph id="37972" label="STG, Model 1" cy:registered="1">
      <node id="39005" label="0000000000"/>
      <node id="39004" label="0000000010"/>
      <node id="39003" label="0001000000"/>
      <node id="39002" label="1000000000"/>
      <node id="39001" label="1000000010"/>
      <node id="39000" label="1001000000"/>
      <node id="38999" label="1100000000"/>
      <node id="38998" label="1100000010"/>
      <node id="38997" label="1101000000"/>
      <node id="38996" label="0100000000"/>
      <node id="38995" label="0100000010"/>
      <node id="38994" label="0101000000"/>
      <node id="38993" label="1010000000"/>
      <node id="38992" label="1010000010"/>
      <node id="38991" label="1110000000"/>
      <node id="38990" label="0010000000"/>
      <node id="38989" label="0010000010"/>
      <node id="38988" label="1110000010"/>
      <node id="38987" label="0110000000"/>
      <node id="38986" label="0110000010"/>
      <node id="38985" label="0001000010"/>
      <node id="38984" label="1001000010"/>
      <node id="38983" label="1101000010"/>
      <node id="38982" label="1101100000"/>
      <node id="38981" label="0101000010"/>
      <node id="38980" label="0101100000"/>
      <node id="38979" label="1011000000"/>
      <node id="38978" label="1011000010"/>
      <node id="38977" label="1111000000"/>
      <node id="38976" label="0011000000"/>
      <node id="38975" label="0011000010"/>
      <node id="38974" label="1111000010"/>
      <node id="38973" label="1111100000"/>
      <node id="38972" label="0111000000"/>
      <node id="38971" label="0111000010"/>
      <node id="38970" label="0111100000"/>
      <node id="38969" label="1000100000"/>
      <node id="38968" label="1000110000"/>
      <node id="38967" label="1001100000"/>
      <node id="38966" label="1010100000"/>
      <node id="38965" label="1100100000"/>
      <node id="38964" label="0000100000"/>
      <node id="38963" label="0000110000"/>
      <node id="38962" label="0001100000"/>
      <node id="38961" label="0010100000"/>
      <node id="38960" label="1100110000"/>
      <node id="38959" label="0100100000"/>
      <node id="38958" label="0100110000"/>
      <node id="38957" label="1010110000"/>
      <node id="38956" label="1110100000"/>
      <node id="38955" label="0010110000"/>
      <node id="38954" label="1110110000"/>
      <node id="38953" label="0110100000"/>
      <node id="38952" label="0110110000"/>
      <node id="38951" label="1001110000"/>
      <node id="38950" label="1011100000"/>
      <node id="38949" label="1000010000"/>
      <node id="38948" label="1000010010"/>
      <node id="38947" label="1000011000"/>
      <node id="38946" label="1001010000"/>
      <node id="38945" label="0001110000"/>
      <node id="38944" label="0011100000"/>
      <node id="38943" label="0000010000"/>
      <node id="38942" label="0000010010"/>
      <node id="38941" label="0000011000"/>
      <node id="38940" label="0001010000"/>
      <node id="38939" label="1101110000"/>
      <node id="38938" label="1100010000"/>
      <node id="38937" label="1100010010"/>
      <node id="38936" label="1100011000"/>
      <node id="38935" label="1101010000"/>
      <node id="38934" label="0101110000"/>
      <node id="38933" label="0100010000"/>
      <node id="38932" label="0100010010"/>
      <node id="38931" label="0100011000"/>
      <node id="38930" label="0101010000"/>
      <node id="38929" label="1011110000"/>
      <node id="38928" label="1010010000"/>
      <node id="38927" label="1010010010"/>
      <node id="38926" label="1010011000"/>
      <node id="38925" label="0011110000"/>
      <node id="38924" label="0010010000"/>
      <node id="38923" label="0010010010"/>
      <node id="38922" label="0010011000"/>
      <node id="38921" label="1111110000"/>
      <node id="38920" label="1110010000"/>
      <node id="38919" label="1110010010"/>
      <node id="38918" label="1110011000"/>
      <node id="38917" label="0111110000"/>
      <node id="38916" label="0110010000"/>
      <node id="38915" label="0110010010"/>
      <node id="38914" label="0110011000"/>
      <node id="38913" label="1001010010"/>
      <node id="38912" label="1001011000"/>
      <node id="38911" label="0001010010"/>
      <node id="38910" label="0001011000"/>
      <node id="38909" label="1101010010"/>
      <node id="38908" label="1101011000"/>
      <node id="38907" label="0101010010"/>
      <node id="38906" label="0101011000"/>
      <node id="38905" label="1000001000"/>
      <node id="38904" label="1000001010"/>
      <node id="38903" label="1001001000"/>
      <node id="38902" label="1100001000"/>
      <node id="38901" label="0000001000"/>
      <node id="38900" label="0000001010"/>
      <node id="38899" label="0001001000"/>
      <node id="38898" label="1100001010"/>
      <node id="38897" label="1101001000"/>
      <node id="38896" label="0100001000"/>
      <node id="38895" label="0100001010"/>
      <node id="38894" label="0101001000"/>
      <node id="38893" label="1011010000"/>
      <node id="38892" label="1011010010"/>
      <node id="38891" label="1011011000"/>
      <node id="38890" label="0011010000"/>
      <node id="38889" label="0011010010"/>
      <node id="38888" label="0011011000"/>
      <node id="38887" label="0111010000"/>
      <node id="38886" label="0111010010"/>
      <node id="38885" label="0111011000"/>
      <node id="38884" label="1111010000"/>
      <node id="38883" label="1111010010"/>
      <node id="38882" label="1111011000"/>
      <node id="38881" label="1010001000"/>
      <node id="38880" label="1010001010"/>
      <node id="38879" label="1110001000"/>
      <node id="38878" label="0010001000"/>
      <node id="38877" label="0010001010"/>
      <node id="38876" label="1000111000"/>
      <node id="38875" label="1110001010"/>
      <node id="38874" label="0000111000"/>
      <node id="38873" label="0110001000"/>
      <node id="38872" label="0110001010"/>
      <node id="38871" label="1100111000"/>
      <node id="38870" label="0100111000"/>
      <node id="38869" label="1010111000"/>
      <node id="38868" label="1001001010"/>
      <node id="38867" label="0001001010"/>
      <node id="38866" label="0010111000"/>
      <node id="38865" label="1110111000"/>
      <node id="38864" label="1101001010"/>
      <node id="38863" label="1101101000"/>
      <node id="38862" label="0110111000"/>
      <node id="38861" label="0101001010"/>
      <node id="38860" label="0101101000"/>
      <node id="38859" label="1000000100"/>
      <node id="38858" label="1000000110"/>
      <node id="38857" label="1000100100"/>
      <node id="38856" label="1001000100"/>
      <node id="38855" label="1010000100"/>
      <node id="38854" label="1100000100"/>
      <node id="38853" label="1011001000"/>
      <node id="38852" label="1011001010"/>
      <node id="38851" label="1111001000"/>
      <node id="38850" label="0000000100"/>
      <node id="38849" label="0000000110"/>
      <node id="38848" label="0000100100"/>
      <node id="38847" label="0001000100"/>
      <node id="38846" label="0010000100"/>
      <node id="38845" label="0011001000"/>
      <node id="38844" label="0011001010"/>
      <node id="38843" label="1001111000"/>
      <node id="38842" label="1100000110"/>
      <node id="38841" label="1100100100"/>
      <node id="38840" label="1101000100"/>
      <node id="38839" label="1111001010"/>
      <node id="38838" label="1111101000"/>
      <node id="38837" label="0001111000"/>
      <node id="38836" label="0100000100"/>
      <node id="38835" label="0100000110"/>
      <node id="38834" label="0100100100"/>
      <node id="38833" label="0101000100"/>
      <node id="38832" label="0111001000"/>
      <node id="38831" label="0111001010"/>
      <node id="38830" label="0111101000"/>
      <node id="38829" label="1101111000"/>
      <node id="38828" label="0101111000"/>
      <node id="38827" label="0000101000"/>
      <node id="38826" label="0001101000"/>
      <node id="38825" label="0010101000"/>
      <node id="38824" label="1000101000"/>
      <node id="38823" label="1001101000"/>
      <node id="38822" label="1010101000"/>
      <node id="38821" label="1100101000"/>
      <node id="38820" label="1010000110"/>
      <node id="38819" label="1010100100"/>
      <node id="38818" label="1110000100"/>
      <node id="38817" label="0010000110"/>
      <node id="38816" label="0010100100"/>
      <node id="38815" label="0100101000"/>
      <node id="38814" label="1011111000"/>
      <node id="38813" label="1110000110"/>
      <node id="38812" label="1110100100"/>
      <node id="38811" label="0011111000"/>
      <node id="38810" label="0110000100"/>
      <node id="38809" label="0110000110"/>
      <node id="38808" label="0110100100"/>
      <node id="38807" label="1111111000"/>
      <node id="38806" label="0111111000"/>
      <node id="38805" label="1110101000"/>
      <node id="38804" label="0110101000"/>
      <node id="38803" label="1001000110"/>
      <node id="38802" label="1001100100"/>
      <node id="38801" label="1011000100"/>
      <node id="38800" label="0001000110"/>
      <node id="38799" label="0001100100"/>
      <node id="38798" label="0011000100"/>
      <node id="38797" label="1101000110"/>
      <node id="38796" label="1101100100"/>
      <node id="38795" label="0101000110"/>
      <node id="38794" label="0101100100"/>
      <node id="38793" label="1000011010"/>
      <node id="38792" label="1000011100"/>
      <node id="38791" label="0000011010"/>
      <node id="38790" label="0000011100"/>
      <node id="38789" label="0011101000"/>
      <node id="38788" label="1011101000"/>
      <node id="38787" label="1011000110"/>
      <node id="38786" label="1011100100"/>
      <node id="38785" label="1111000100"/>
      <node id="38784" label="1100011010"/>
      <node id="38783" label="1100011100"/>
      <node id="38782" label="0011000110"/>
      <node id="38781" label="0011100100"/>
      <node id="38780" label="0100011010"/>
      <node id="38779" label="0100011100"/>
      <node id="38778" label="1111000110"/>
      <node id="38777" label="1111100100"/>
      <node id="38776" label="0111000100"/>
      <node id="38775" label="0111000110"/>
      <node id="38774" label="0111100100"/>
      <node id="38773" label="1000110100"/>
      <node id="38772" label="1010011010"/>
      <node id="38771" label="1010011100"/>
      <node id="38770" label="0010011010"/>
      <node id="38769" label="0010011100"/>
      <node id="38768" label="0000110100"/>
      <node id="38767" label="1110011010"/>
      <node id="38766" label="1110011100"/>
      <node id="38765" label="1100110100"/>
      <node id="38764" label="0110011010"/>
      <node id="38763" label="0110011100"/>
      <node id="38762" label="0100110100"/>
      <node id="38761" label="1010110100"/>
      <node id="38760" label="0010110100"/>
      <node id="38759" label="1001011010"/>
      <node id="38758" label="1001011100"/>
      <node id="38757" label="1110110100"/>
      <node id="38756" label="0001011010"/>
      <node id="38755" label="0001011100"/>
      <node id="38754" label="0110110100"/>
      <node id="38753" label="1101011010"/>
      <node id="38752" label="1101011100"/>
      <node id="38751" label="0101011010"/>
      <node id="38750" label="0101011100"/>
      <node id="38749" label="1101100010"/>
      <node id="38748" label="1001110100"/>
      <node id="38747" label="1011011010"/>
      <node id="38746" label="1011011100"/>
      <node id="38745" label="0101100010"/>
      <node id="38744" label="0001110100"/>
      <node id="38743" label="0011011010"/>
      <node id="38742" label="0011011100"/>
      <node id="38741" label="0000010100"/>
      <node id="38740" label="0000010110"/>
      <node id="38739" label="0001010100"/>
      <node id="38738" label="0010010100"/>
      <node id="38737" label="1000010100"/>
      <node id="38736" label="1000010110"/>
      <node id="38735" label="1001010100"/>
      <node id="38734" label="1010010100"/>
      <node id="38733" label="1101110100"/>
      <node id="38732" label="0101110100"/>
      <node id="38731" label="0111011010"/>
      <node id="38730" label="0111011100"/>
      <node id="38729" label="1111011010"/>
      <node id="38728" label="1111011100"/>
      <node id="38727" label="0100010100"/>
      <node id="38726" label="0100010110"/>
      <node id="38725" label="0101010100"/>
      <node id="38724" label="1100010100"/>
      <node id="38723" label="1100010110"/>
      <node id="38722" label="1101010100"/>
      <node id="38721" label="1000111100"/>
      <node id="38720" label="0000111100"/>
      <node id="38719" label="1111100010"/>
      <node id="38718" label="1100111100"/>
      <node id="38717" label="1011110100"/>
      <node id="38716" label="0011110100"/>
      <node id="38715" label="0111100010"/>
      <node id="38714" label="0100111100"/>
      <node id="38713" label="0010010110"/>
      <node id="38712" label="1010010110"/>
      <node id="38711" label="1111110100"/>
      <node id="38710" label="0111110100"/>
      <node id="38709" label="0110010100"/>
      <node id="38708" label="0110010110"/>
      <node id="38707" label="1110010100"/>
      <node id="38706" label="1110010110"/>
      <node id="38705" label="1000100010"/>
      <node id="38704" label="1000110010"/>
      <node id="38703" label="1001100010"/>
      <node id="38702" label="1010100010"/>
      <node id="38701" label="1100100010"/>
      <node id="38700" label="0000100010"/>
      <node id="38699" label="0000110010"/>
      <node id="38698" label="0001100010"/>
      <node id="38697" label="0010100010"/>
      <node id="38696" label="1010111100"/>
      <node id="38695" label="1100110010"/>
      <node id="38694" label="0010111100"/>
      <node id="38693" label="0100100010"/>
      <node id="38692" label="0100110010"/>
      <node id="38691" label="0000000001"/>
      <node id="38690" label="0000000011"/>
      <node id="38689" label="0000000101"/>
      <node id="38688" label="0001000001"/>
      <node id="38687" label="1000000001"/>
      <node id="38686" label="1000000011"/>
      <node id="38685" label="1000000101"/>
      <node id="38684" label="1001000001"/>
      <node id="38683" label="1100000001"/>
      <node id="38682" label="1110111100"/>
      <node id="38681" label="0110111100"/>
      <node id="38680" label="1100000011"/>
      <node id="38679" label="1100000101"/>
      <node id="38678" label="1101000001"/>
      <node id="38677" label="0100000001"/>
      <node id="38676" label="0100000011"/>
      <node id="38675" label="0100000101"/>
      <node id="38674" label="0101000001"/>
      <node id="38673" label="0001010110"/>
      <node id="38672" label="0011010100"/>
      <node id="38671" label="1001010110"/>
      <node id="38670" label="1011010100"/>
      <node id="38669" label="1010110010"/>
      <node id="38668" label="1110100010"/>
      <node id="38667" label="0010110010"/>
      <node id="38666" label="0101010110"/>
      <node id="38665" label="1101010110"/>
      <node id="38664" label="1110110010"/>
      <node id="38663" label="1000001100"/>
      <node id="38662" label="1000001110"/>
      <node id="38661" label="1001001100"/>
      <node id="38660" label="1010001100"/>
      <node id="38659" label="1100001100"/>
      <node id="38658" label="0000001100"/>
      <node id="38657" label="0000001110"/>
      <node id="38656" label="0001001100"/>
      <node id="38655" label="0010001100"/>
      <node id="38654" label="0110100010"/>
      <node id="38653" label="0110110010"/>
      <node id="38652" label="1010000001"/>
      <node id="38651" label="1010000011"/>
      <node id="38650" label="1010000101"/>
      <node id="38649" label="1110000001"/>
      <node id="38648" label="0010000001"/>
      <node id="38647" label="0010000011"/>
      <node id="38646" label="0010000101"/>
      <node id="38645" label="1001111100"/>
      <node id="38644" label="1100001110"/>
      <node id="38643" label="1101001100"/>
      <node id="38642" label="0001111100"/>
      <node id="38641" label="0100001100"/>
      <node id="38640" label="0100001110"/>
      <node id="38639" label="0101001100"/>
      <node id="38638" label="1110000011"/>
      <node id="38637" label="1110000101"/>
      <node id="38636" label="0110000001"/>
      <node id="38635" label="0110000011"/>
      <node id="38634" label="0110000101"/>
      <node id="38633" label="1101111100"/>
      <node id="38632" label="0101111100"/>
      <node id="38631" label="0011010110"/>
      <node id="38630" label="1011010110"/>
      <node id="38629" label="0111010100"/>
      <node id="38628" label="0111010110"/>
      <node id="38627" label="1111010100"/>
      <node id="38626" label="1111010110"/>
      <node id="38625" label="1001110010"/>
      <node id="38624" label="1011100010"/>
      <node id="38623" label="1010001110"/>
      <node id="38622" label="1110001100"/>
      <node id="38621" label="0010001110"/>
      <node id="38620" label="0001110010"/>
      <node id="38619" label="0011100010"/>
      <node id="38618" label="0011111100"/>
      <node id="38617" label="1101110010"/>
      <node id="38616" label="1011111100"/>
      <node id="38615" label="0001000011"/>
      <node id="38614" label="0001000101"/>
      <node id="38613" label="1001000011"/>
      <node id="38612" label="1001000101"/>
      <node id="38611" label="0110001100"/>
      <node id="38610" label="0110001110"/>
      <node id="38609" label="1110001110"/>
      <node id="38608" label="0101110010"/>
      <node id="38607" label="1111111100"/>
      <node id="38606" label="0111111100"/>
      <node id="38605" label="1101000011"/>
      <node id="38604" label="1101000101"/>
      <node id="38603" label="1101100001"/>
      <node id="38602" label="0101000011"/>
      <node id="38601" label="0101000101"/>
      <node id="38600" label="0101100001"/>
      <node id="38599" label="1011110010"/>
      <node id="38598" label="0011110010"/>
      <node id="38597" label="1111110010"/>
      <node id="38596" label="1001001110"/>
      <node id="38595" label="1011001100"/>
      <node id="38594" label="0011000001"/>
      <node id="38593" label="0011000011"/>
      <node id="38592" label="0011000101"/>
      <node id="38591" label="0001001110"/>
      <node id="38590" label="0011001100"/>
      <node id="38589" label="0111110010"/>
      <node id="38588" label="1011000001"/>
      <node id="38587" label="1011000011"/>
      <node id="38586" label="1011000101"/>
      <node id="38585" label="1111000001"/>
      <node id="38584" label="1101001110"/>
      <node id="38583" label="1101101100"/>
      <node id="38582" label="0101001110"/>
      <node id="38581" label="0101101100"/>
      <node id="38580" label="1111000011"/>
      <node id="38579" label="1111000101"/>
      <node id="38578" label="1111100001"/>
      <node id="38577" label="0111000001"/>
      <node id="38576" label="0111000011"/>
      <node id="38575" label="0111000101"/>
      <node id="38574" label="0111100001"/>
      <node id="38573" label="0000100001"/>
      <node id="38572" label="0000100101"/>
      <node id="38571" label="0000110001"/>
      <node id="38570" label="0001100001"/>
      <node id="38569" label="0010100001"/>
      <node id="38568" label="1000100001"/>
      <node id="38567" label="1000100101"/>
      <node id="38566" label="1000110001"/>
      <node id="38565" label="1001100001"/>
      <node id="38564" label="1010100001"/>
      <node id="38563" label="1100100001"/>
      <node id="38562" label="1011001110"/>
      <node id="38561" label="1111001100"/>
      <node id="38560" label="0011001110"/>
      <node id="38559" label="1100100101"/>
      <node id="38558" label="1100110001"/>
      <node id="38557" label="0100100001"/>
      <node id="38556" label="0100100101"/>
      <node id="38555" label="0100110001"/>
      <node id="38554" label="1111001110"/>
      <node id="38553" label="1111101100"/>
      <node id="38552" label="0111001100"/>
      <node id="38551" label="0111001110"/>
      <node id="38550" label="0111101100"/>
      <node id="38549" label="0000101100"/>
      <node id="38548" label="0001101100"/>
      <node id="38547" label="0010101100"/>
      <node id="38546" label="1000101100"/>
      <node id="38545" label="1001101100"/>
      <node id="38544" label="1010101100"/>
      <node id="38543" label="1100101100"/>
      <node id="38542" label="0010100101"/>
      <node id="38541" label="0010110001"/>
      <node id="38540" label="1010100101"/>
      <node id="38539" label="1010110001"/>
      <node id="38538" label="1110100001"/>
      <node id="38537" label="0100101100"/>
      <node id="38536" label="1110100101"/>
      <node id="38535" label="1110110001"/>
      <node id="38534" label="0110100001"/>
      <node id="38533" label="0110100101"/>
      <node id="38532" label="0110110001"/>
      <node id="38531" label="1110101100"/>
      <node id="38530" label="0110101100"/>
      <node id="38529" label="1000010001"/>
      <node id="38528" label="1000010011"/>
      <node id="38527" label="1000010101"/>
      <node id="38526" label="1000011001"/>
      <node id="38525" label="1001010001"/>
      <node id="38524" label="0000010001"/>
      <node id="38523" label="0000010011"/>
      <node id="38522" label="0000010101"/>
      <node id="38521" label="0000011001"/>
      <node id="38520" label="0001010001"/>
      <node id="38519" label="0001100101"/>
      <node id="38518" label="0001110001"/>
      <node id="38517" label="0011100001"/>
      <node id="38516" label="1001100101"/>
      <node id="38515" label="1001110001"/>
      <node id="38514" label="1011100001"/>
      <node id="38513" label="1101100101"/>
      <node id="38512" label="1101110001"/>
      <node id="38511" label="1100010001"/>
      <node id="38510" label="1100010011"/>
      <node id="38509" label="1100010101"/>
      <node id="38508" label="1100011001"/>
      <node id="38507" label="1101010001"/>
      <node id="38506" label="0101100101"/>
      <node id="38505" label="0101110001"/>
      <node id="38504" label="0100010001"/>
      <node id="38503" label="0100010011"/>
      <node id="38502" label="0100010101"/>
      <node id="38501" label="0100011001"/>
      <node id="38500" label="0101010001"/>
      <node id="38499" label="1101101010"/>
      <node id="38498" label="1000011110"/>
      <node id="38497" label="0000011110"/>
      <node id="38496" label="0011100101"/>
      <node id="38495" label="0011110001"/>
      <node id="38494" label="1011100101"/>
      <node id="38493" label="1011110001"/>
      <node id="38492" label="0101101010"/>
      <node id="38491" label="0010010001"/>
      <node id="38490" label="0010010011"/>
      <node id="38489" label="0010010101"/>
      <node id="38488" label="0010011001"/>
      <node id="38487" label="0011101100"/>
      <node id="38486" label="1011101100"/>
      <node id="38485" label="1010010001"/>
      <node id="38484" label="1010010011"/>
      <node id="38483" label="1010010101"/>
      <node id="38482" label="1010011001"/>
      <node id="38481" label="1100011110"/>
      <node id="38480" label="0100011110"/>
      <node id="38479" label="1111100101"/>
      <node id="38478" label="1111110001"/>
      <node id="38477" label="1110010001"/>
      <node id="38476" label="1110010011"/>
      <node id="38475" label="1110010101"/>
      <node id="38474" label="1110011001"/>
      <node id="38473" label="0111100101"/>
      <node id="38472" label="0111110001"/>
      <node id="38471" label="0110010001"/>
      <node id="38470" label="0110010011"/>
      <node id="38469" label="0110010101"/>
      <node id="38468" label="0110011001"/>
      <node id="38467" label="1000100110"/>
      <node id="38466" label="0000100110"/>
      <node id="38465" label="1010011110"/>
      <node id="38464" label="1100100110"/>
      <node id="38463" label="1111101010"/>
      <node id="38462" label="0010011110"/>
      <node id="38461" label="0100100110"/>
      <node id="38460" label="0111101010"/>
      <node id="38459" label="1110011110"/>
      <node id="38458" label="0110011110"/>
      <node id="38457" label="1001010011"/>
      <node id="38456" label="1001010101"/>
      <node id="38455" label="1001011001"/>
      <node id="38454" label="0001010011"/>
      <node id="38453" label="0001010101"/>
      <node id="38452" label="0001011001"/>
      <node id="38451" label="0000101010"/>
      <node id="38450" label="0000111010"/>
      <node id="38449" label="0001101010"/>
      <node id="38448" label="0010101010"/>
      <node id="38447" label="1000101010"/>
      <node id="38446" label="1000111010"/>
      <node id="38445" label="1001101010"/>
      <node id="38444" label="1010101010"/>
      <node id="38443" label="1100101010"/>
      <node id="38442" label="1101010011"/>
      <node id="38441" label="1101010101"/>
      <node id="38440" label="1101011001"/>
      <node id="38439" label="0101010011"/>
      <node id="38438" label="0101010101"/>
      <node id="38437" label="0101011001"/>
      <node id="38436" label="1010100110"/>
      <node id="38435" label="1100111010"/>
      <node id="38434" label="0010100110"/>
      <node id="38433" label="0100101010"/>
      <node id="38432" label="0100111010"/>
      <node id="38431" label="1000001001"/>
      <node id="38430" label="1000001011"/>
      <node id="38429" label="1000001101"/>
      <node id="38428" label="1001001001"/>
      <node id="38427" label="1100001001"/>
      <node id="38426" label="0000001001"/>
      <node id="38425" label="0000001011"/>
      <node id="38424" label="0000001101"/>
      <node id="38423" label="0001001001"/>
      <node id="38422" label="1110100110"/>
      <node id="38421" label="0110100110"/>
      <node id="38420" label="1100001011"/>
      <node id="38419" label="1100001101"/>
      <node id="38418" label="1101001001"/>
      <node id="38417" label="0100001001"/>
      <node id="38416" label="0100001011"/>
      <node id="38415" label="0100001101"/>
      <node id="38414" label="0101001001"/>
      <node id="38413" label="1001011110"/>
      <node id="38412" label="0001011110"/>
      <node id="38411" label="1011010001"/>
      <node id="38410" label="1011010011"/>
      <node id="38409" label="1011010101"/>
      <node id="38408" label="1011011001"/>
      <node id="38407" label="0011010001"/>
      <node id="38406" label="0011010011"/>
      <node id="38405" label="0011010101"/>
      <node id="38404" label="0011011001"/>
      <node id="38403" label="1101011110"/>
      <node id="38402" label="0010111010"/>
      <node id="38401" label="0101011110"/>
      <node id="38400" label="1010111010"/>
      <node id="38399" label="1110101010"/>
      <node id="38398" label="0111010001"/>
      <node id="38397" label="0111010011"/>
      <node id="38396" label="0111010101"/>
      <node id="38395" label="0111011001"/>
      <node id="38394" label="1111010001"/>
      <node id="38393" label="1111010011"/>
      <node id="38392" label="1111010101"/>
      <node id="38391" label="1111011001"/>
      <node id="38390" label="1110111010"/>
      <node id="38389" label="0110101010"/>
      <node id="38388" label="0110111010"/>
      <node id="38387" label="1010001001"/>
      <node id="38386" label="1010001011"/>
      <node id="38385" label="1010001101"/>
      <node id="38384" label="1110001001"/>
      <node id="38383" label="0010001001"/>
      <node id="38382" label="0010001011"/>
      <node id="38381" label="0010001101"/>
      <node id="38380" label="1001100110"/>
      <node id="38379" label="0001100110"/>
      <node id="38378" label="1110001011"/>
      <node id="38377" label="1110001101"/>
      <node id="38376" label="1000110101"/>
      <node id="38375" label="1000111001"/>
      <node id="38374" label="0110001001"/>
      <node id="38373" label="0110001011"/>
      <node id="38372" label="0110001101"/>
      <node id="38371" label="0000110101"/>
      <node id="38370" label="0000111001"/>
      <node id="38369" label="1011011110"/>
      <node id="38368" label="1101100110"/>
      <node id="38367" label="0011011110"/>
      <node id="38366" label="0101100110"/>
      <node id="38365" label="1100110101"/>
      <node id="38364" label="1100111001"/>
      <node id="38363" label="0100110101"/>
      <node id="38362" label="0100111001"/>
      <node id="38361" label="0111011110"/>
      <node id="38360" label="1111011110"/>
      <node id="38359" label="0001111010"/>
      <node id="38358" label="0011101010"/>
      <node id="38357" label="1001111010"/>
      <node id="38356" label="1011101010"/>
      <node id="38355" label="1101111010"/>
      <node id="38354" label="1010110101"/>
      <node id="38353" label="1010111001"/>
      <node id="38352" label="0001001011"/>
      <node id="38351" label="0001001101"/>
      <node id="38350" label="1011100110"/>
      <node id="38349" label="0011100110"/>
      <node id="38348" label="0010110101"/>
      <node id="38347" label="0010111001"/>
      <node id="38346" label="0101111010"/>
      <node id="38345" label="1001001011"/>
      <node id="38344" label="1001001101"/>
      <node id="38343" label="1111100110"/>
      <node id="38342" label="0111100110"/>
      <node id="38341" label="1101001011"/>
      <node id="38340" label="1101001101"/>
      <node id="38339" label="1101101001"/>
      <node id="38338" label="1110110101"/>
      <node id="38337" label="1110111001"/>
      <node id="38336" label="0101001011"/>
      <node id="38335" label="0101001101"/>
      <node id="38334" label="0101101001"/>
      <node id="38333" label="0110110101"/>
      <node id="38332" label="0110111001"/>
      <node id="38331" label="1000110110"/>
      <node id="38330" label="0000110110"/>
      <node id="38329" label="0011111010"/>
      <node id="38328" label="1011111010"/>
      <node id="38327" label="1100110110"/>
      <node id="38326" label="1111111010"/>
      <node id="38325" label="1000000111"/>
      <node id="38324" label="0011001001"/>
      <node id="38323" label="0011001011"/>
      <node id="38322" label="0011001101"/>
      <node id="38321" label="1011001001"/>
      <node id="38320" label="1011001011"/>
      <node id="38319" label="1011001101"/>
      <node id="38318" label="1111001001"/>
      <node id="38317" label="0100110110"/>
      <node id="38316" label="0111111010"/>
      <node id="38315" label="0000000111"/>
      <node id="38314" label="1100000111"/>
      <node id="38313" label="1001110101"/>
      <node id="38312" label="1001111001"/>
      <node id="38311" label="1111001011"/>
      <node id="38310" label="1111001101"/>
      <node id="38309" label="1111101001"/>
      <node id="38308" label="0100000111"/>
      <node id="38307" label="0001110101"/>
      <node id="38306" label="0001111001"/>
      <node id="38305" label="0111001001"/>
      <node id="38304" label="0111001011"/>
      <node id="38303" label="0111001101"/>
      <node id="38302" label="0111101001"/>
      <node id="38301" label="1101110101"/>
      <node id="38300" label="1101111001"/>
      <node id="38299" label="0101110101"/>
      <node id="38298" label="0101111001"/>
      <node id="38297" label="1010110110"/>
      <node id="38296" label="0010110110"/>
      <node id="38295" label="0000101001"/>
      <node id="38294" label="0000101101"/>
      <node id="38293" label="0001101001"/>
      <node id="38292" label="0010101001"/>
      <node id="38291" label="1000101001"/>
      <node id="38290" label="1000101101"/>
      <node id="38289" label="1001101001"/>
      <node id="38288" label="1010101001"/>
      <node id="38287" label="1100101001"/>
      <node id="38286" label="1110110110"/>
      <node id="38285" label="0110110110"/>
      <node id="38284" label="0010000111"/>
      <node id="38283" label="1010000111"/>
      <node id="38282" label="1100101101"/>
      <node id="38281" label="0100101001"/>
      <node id="38280" label="0100101101"/>
      <node id="38279" label="1110000111"/>
      <node id="38278" label="1011110101"/>
      <node id="38277" label="1011111001"/>
      <node id="38276" label="0011110101"/>
      <node id="38275" label="0011111001"/>
      <node id="38274" label="0110000111"/>
      <node id="38273" label="1111110101"/>
      <node id="38272" label="1111111001"/>
      <node id="38271" label="0111110101"/>
      <node id="38270" label="0111111001"/>
      <node id="38269" label="0010101101"/>
      <node id="38268" label="1010101101"/>
      <node id="38267" label="1110101001"/>
      <node id="38266" label="1001110110"/>
      <node id="38265" label="0001110110"/>
      <node id="38264" label="1110101101"/>
      <node id="38263" label="0110101001"/>
      <node id="38262" label="0110101101"/>
      <node id="38261" label="1101110110"/>
      <node id="38260" label="0101110110"/>
      <node id="38259" label="0001000111"/>
      <node id="38258" label="1001000111"/>
      <node id="38257" label="1101000111"/>
      <node id="38256" label="0101000111"/>
      <node id="38255" label="1000111110"/>
      <node id="38254" label="0000111110"/>
      <node id="38253" label="0100111110"/>
      <node id="38252" label="1011110110"/>
      <node id="38251" label="1100111110"/>
      <node id="38250" label="0011110110"/>
      <node id="38249" label="1000011011"/>
      <node id="38248" label="1000011101"/>
      <node id="38247" label="0000011011"/>
      <node id="38246" label="0000011101"/>
      <node id="38245" label="1001101101"/>
      <node id="38244" label="1011101001"/>
      <node id="38243" label="0001101101"/>
      <node id="38242" label="0011101001"/>
      <node id="38241" label="0111110110"/>
      <node id="38240" label="1111110110"/>
      <node id="38239" label="0011000111"/>
      <node id="38238" label="1011000111"/>
      <node id="38237" label="1101101101"/>
      <node id="38236" label="0100011011"/>
      <node id="38235" label="0100011101"/>
      <node id="38234" label="1100011011"/>
      <node id="38233" label="1100011101"/>
      <node id="38232" label="0101101101"/>
      <node id="38231" label="1111000111"/>
      <node id="38230" label="0111000111"/>
      <node id="38229" label="1010111110"/>
      <node id="38228" label="0010111110"/>
      <node id="38227" label="0010011011"/>
      <node id="38226" label="0010011101"/>
      <node id="38225" label="1110111110"/>
      <node id="38224" label="0110111110"/>
      <node id="38223" label="1010011011"/>
      <node id="38222" label="1010011101"/>
      <node id="38221" label="0011101101"/>
      <node id="38220" label="1011101101"/>
      <node id="38219" label="1110011011"/>
      <node id="38218" label="1110011101"/>
      <node id="38217" label="1111101101"/>
      <node id="38216" label="0110011011"/>
      <node id="38215" label="0110011101"/>
      <node id="38214" label="0111101101"/>
      <node id="38213" label="1001111110"/>
      <node id="38212" label="0001111110"/>
      <node id="38211" label="1101111110"/>
      <node id="38210" label="0101111110"/>
      <node id="38209" label="1001011011"/>
      <node id="38208" label="1001011101"/>
      <node id="38207" label="0001011011"/>
      <node id="38206" label="0001011101"/>
      <node id="38205" label="1101011011"/>
      <node id="38204" label="1101011101"/>
      <node id="38203" label="0101011011"/>
      <node id="38202" label="0101011101"/>
      <node id="38201" label="1011111110"/>
      <node id="38200" label="0011111110"/>
      <node id="38199" label="1101100011"/>
      <node id="38198" label="1111111110"/>
      <node id="38197" label="0101100011"/>
      <node id="38196" label="0000010111"/>
      <node id="38195" label="0111111110"/>
      <node id="38194" label="0011011011"/>
      <node id="38193" label="0011011101"/>
      <node id="38192" label="1011011011"/>
      <node id="38191" label="1011011101"/>
      <node id="38190" label="1000010111"/>
      <node id="38189" label="1100010111"/>
      <node id="38188" label="0100010111"/>
      <node id="38187" label="0111011011"/>
      <node id="38186" label="0111011101"/>
      <node id="38185" label="1111011011"/>
      <node id="38184" label="1111011101"/>
      <node id="38183" label="1000111101"/>
      <node id="38182" label="0000111101"/>
      <node id="38181" label="1101101110"/>
      <node id="38180" label="0101101110"/>
      <node id="38179" label="0010010111"/>
      <node id="38178" label="0100111101"/>
      <node id="38177" label="1010010111"/>
      <node id="38176" label="1111100011"/>
      <node id="38175" label="0111100011"/>
      <node id="38174" label="1100111101"/>
      <node id="38173" label="1110010111"/>
      <node id="38172" label="0110010111"/>
      <node id="38171" label="0000100011"/>
      <node id="38170" label="0000100111"/>
      <node id="38169" label="0000110011"/>
      <node id="38168" label="0001100011"/>
      <node id="38167" label="0010100011"/>
      <node id="38166" label="1000100011"/>
      <node id="38165" label="1000100111"/>
      <node id="38164" label="1000110011"/>
      <node id="38163" label="1001100011"/>
      <node id="38162" label="1010100011"/>
      <node id="38161" label="1100100011"/>
      <node id="38160" label="1010111101"/>
      <node id="38159" label="1100100111"/>
      <node id="38158" label="1100110011"/>
      <node id="38157" label="0010111101"/>
      <node id="38156" label="0100100011"/>
      <node id="38155" label="0100100111"/>
      <node id="38154" label="0100110011"/>
      <node id="38153" label="1111101110"/>
      <node id="38152" label="0111101110"/>
      <node id="38151" label="1110111101"/>
      <node id="38150" label="0110111101"/>
      <node id="38149" label="1001010111"/>
      <node id="38148" label="0001010111"/>
      <node id="38147" label="0000101110"/>
      <node id="38146" label="0001101110"/>
      <node id="38145" label="0010101110"/>
      <node id="38144" label="1000101110"/>
      <node id="38143" label="1001101110"/>
      <node id="38142" label="1010101110"/>
      <node id="38141" label="1100101110"/>
      <node id="38140" label="1101010111"/>
      <node id="38139" label="0010100111"/>
      <node id="38138" label="0010110011"/>
      <node id="38137" label="0101010111"/>
      <node id="38136" label="1010100111"/>
      <node id="38135" label="1010110011"/>
      <node id="38134" label="1110100011"/>
      <node id="38133" label="0100101110"/>
      <node id="38132" label="0000001111"/>
      <node id="38131" label="1000001111"/>
      <node id="38130" label="1110100111"/>
      <node id="38129" label="1110110011"/>
      <node id="38128" label="0110100011"/>
      <node id="38127" label="0110100111"/>
      <node id="38126" label="0110110011"/>
      <node id="38125" label="1100001111"/>
      <node id="38124" label="1001111101"/>
      <node id="38123" label="0100001111"/>
      <node id="38122" label="0001111101"/>
      <node id="38121" label="1101111101"/>
      <node id="38120" label="1011010111"/>
      <node id="38119" label="0101111101"/>
      <node id="38118" label="0011010111"/>
      <node id="38117" label="1110101110"/>
      <node id="38116" label="0111010111"/>
      <node id="38115" label="1111010111"/>
      <node id="38114" label="0110101110"/>
      <node id="38113" label="0010001111"/>
      <node id="38112" label="1010001111"/>
      <node id="38111" label="0001100111"/>
      <node id="38110" label="0001110011"/>
      <node id="38109" label="0011100011"/>
      <node id="38108" label="1001100111"/>
      <node id="38107" label="1001110011"/>
      <node id="38106" label="1011100011"/>
      <node id="38105" label="1110001111"/>
      <node id="38104" label="1101100111"/>
      <node id="38103" label="1101110011"/>
      <node id="38102" label="1011111101"/>
      <node id="38101" label="0101100111"/>
      <node id="38100" label="0101110011"/>
      <node id="38099" label="0011111101"/>
      <node id="38098" label="0110001111"/>
      <node id="38097" label="1111111101"/>
      <node id="38096" label="0111111101"/>
      <node id="38095" label="0011101110"/>
      <node id="38094" label="1011101110"/>
      <node id="38093" label="0011100111"/>
      <node id="38092" label="0011110011"/>
      <node id="38091" label="1011100111"/>
      <node id="38090" label="1011110011"/>
      <node id="38089" label="0111100111"/>
      <node id="38088" label="0111110011"/>
      <node id="38087" label="0001001111"/>
      <node id="38086" label="1001001111"/>
      <node id="38085" label="1111100111"/>
      <node id="38084" label="1111110011"/>
      <node id="38083" label="1101001111"/>
      <node id="38082" label="0101001111"/>
      <node id="38081" label="0011001111"/>
      <node id="38080" label="1011001111"/>
      <node id="38079" label="1111001111"/>
      <node id="38078" label="0111001111"/>
      <node id="38077" label="1000110111"/>
      <node id="38076" label="0000110111"/>
      <node id="38075" label="1100110111"/>
      <node id="38074" label="0100110111"/>
      <node id="38073" label="1010110111"/>
      <node id="38072" label="0010110111"/>
      <node id="38071" label="0000011111"/>
      <node id="38070" label="1000011111"/>
      <node id="38069" label="1101101011"/>
      <node id="38068" label="1110110111"/>
      <node id="38067" label="0101101011"/>
      <node id="38066" label="0110110111"/>
      <node id="38065" label="1100011111"/>
      <node id="38064" label="0100011111"/>
      <node id="38063" label="0010011111"/>
      <node id="38062" label="1010011111"/>
      <node id="38061" label="0001110111"/>
      <node id="38060" label="0111101011"/>
      <node id="38059" label="1001110111"/>
      <node id="38058" label="1111101011"/>
      <node id="38057" label="1110011111"/>
      <node id="38056" label="1101110111"/>
      <node id="38055" label="0101110111"/>
      <node id="38054" label="0110011111"/>
      <node id="38053" label="0000101011"/>
      <node id="38052" label="0000101111"/>
      <node id="38051" label="0000111011"/>
      <node id="38050" label="0001101011"/>
      <node id="38049" label="0010101011"/>
      <node id="38048" label="1000101011"/>
      <node id="38047" label="1000101111"/>
      <node id="38046" label="1000111011"/>
      <node id="38045" label="1001101011"/>
      <node id="38044" label="1010101011"/>
      <node id="38043" label="1100101011"/>
      <node id="38042" label="1100101111"/>
      <node id="38041" label="1100111011"/>
      <node id="38040" label="0100101011"/>
      <node id="38039" label="0100101111"/>
      <node id="38038" label="0100111011"/>
      <node id="38037" label="1011110111"/>
      <node id="38036" label="0011110111"/>
      <node id="38035" label="0001011111"/>
      <node id="38034" label="1001011111"/>
      <node id="38033" label="1111110111"/>
      <node id="38032" label="0111110111"/>
      <node id="38031" label="1101011111"/>
      <node id="38030" label="0101011111"/>
      <node id="38029" label="0010101111"/>
      <node id="38028" label="0010111011"/>
      <node id="38027" label="1010101111"/>
      <node id="38026" label="1010111011"/>
      <node id="38025" label="1110101011"/>
      <node id="38024" label="1110101111"/>
      <node id="38023" label="1110111011"/>
      <node id="38022" label="0110101011"/>
      <node id="38021" label="0110101111"/>
      <node id="38020" label="0110111011"/>
      <node id="38019" label="0011011111"/>
      <node id="38018" label="1011011111"/>
      <node id="38017" label="0111011111"/>
      <node id="38016" label="1111011111"/>
      <node id="38015" label="0001101111"/>
      <node id="38014" label="0001111011"/>
      <node id="38013" label="0011101011"/>
      <node id="38012" label="1001101111"/>
      <node id="38011" label="1001111011"/>
      <node id="38010" label="1011101011"/>
      <node id="38009" label="1101101111"/>
      <node id="38008" label="1101111011"/>
      <node id="38007" label="0101101111"/>
      <node id="38006" label="0101111011"/>
      <node id="38005" label="0011101111"/>
      <node id="38004" label="0011111011"/>
      <node id="38003" label="1011101111"/>
      <node id="38002" label="1011111011"/>
      <node id="38001" label="1111101111"/>
      <node id="38000" label="1111111011"/>
      <node id="37999" label="0111101111"/>
      <node id="37998" label="0111111011"/>
      <node id="37997" label="1000111111"/>
      <node id="37996" label="0000111111"/>
      <node id="37995" label="1100111111"/>
      <node id="37994" label="0100111111"/>
      <node id="37993" label="1010111111"/>
      <node id="37992" label="0010111111"/>
      <node id="37991" label="1110111111"/>
      <node id="37990" label="0110111111"/>
      <node id="37989" label="1001111111"/>
      <node id="37988" label="0001111111"/>
      <node id="37987" label="1101111111"/>
      <node id="37986" label="0101111111"/>
      <node id="37985" label="1011111111"/>
      <node id="37984" label="0011111111"/>
      <node id="37983" label="1111111111"/>
      <node id="37982" label="0111111111"/>
      <edge id="43101" label="0000000000 (1) 0000000010" source="39005" target="39004" cy:directed="1"/>
      <edge id="43100" label="0000000000 (1) 0001000000" source="39005" target="39003" cy:directed="1"/>
      <edge id="43099" label="0000000010 (1) 0001000010" source="39004" target="38985" cy:directed="1"/>
      <edge id="43098" label="0001000000 (1) 0001000010" source="39003" target="38985" cy:directed="1"/>
      <edge id="43097" label="1000000000 (1) 1000000010" source="39002" target="39001" cy:directed="1"/>
      <edge id="43096" label="1000000000 (1) 1001000000" source="39002" target="39000" cy:directed="1"/>
      <edge id="43095" label="1000000000 (1) 1100000000" source="39002" target="38999" cy:directed="1"/>
      <edge id="43094" label="1000000010 (1) 1001000010" source="39001" target="38984" cy:directed="1"/>
      <edge id="43093" label="1000000010 (1) 1100000010" source="39001" target="38998" cy:directed="1"/>
      <edge id="43092" label="1001000000 (1) 1001000010" source="39000" target="38984" cy:directed="1"/>
      <edge id="43091" label="1001000000 (1) 1101000000" source="39000" target="38997" cy:directed="1"/>
      <edge id="43090" label="1100000000 (1) 1100000010" source="38999" target="38998" cy:directed="1"/>
      <edge id="43089" label="1100000000 (1) 1101000000" source="38999" target="38997" cy:directed="1"/>
      <edge id="43088" label="1100000010 (1) 1101000010" source="38998" target="38983" cy:directed="1"/>
      <edge id="43087" label="1101000000 (1) 1101000010" source="38997" target="38983" cy:directed="1"/>
      <edge id="43086" label="1101000000 (1) 1101100000" source="38997" target="38982" cy:directed="1"/>
      <edge id="43085" label="0100000000 (1) 0100000010" source="38996" target="38995" cy:directed="1"/>
      <edge id="43084" label="0100000000 (1) 0101000000" source="38996" target="38994" cy:directed="1"/>
      <edge id="43083" label="0100000000 (1) 0000000000" source="38996" target="39005" cy:directed="1"/>
      <edge id="43082" label="0100000010 (1) 0101000010" source="38995" target="38981" cy:directed="1"/>
      <edge id="43081" label="0100000010 (1) 0000000010" source="38995" target="39004" cy:directed="1"/>
      <edge id="43080" label="0101000000 (1) 0101000010" source="38994" target="38981" cy:directed="1"/>
      <edge id="43079" label="0101000000 (1) 0101100000" source="38994" target="38980" cy:directed="1"/>
      <edge id="43078" label="0101000000 (1) 0001000000" source="38994" target="39003" cy:directed="1"/>
      <edge id="43077" label="1010000000 (1) 1010000010" source="38993" target="38992" cy:directed="1"/>
      <edge id="43076" label="1010000000 (1) 1000000000" source="38993" target="39002" cy:directed="1"/>
      <edge id="43075" label="1010000000 (1) 1110000000" source="38993" target="38991" cy:directed="1"/>
      <edge id="43074" label="1010000010 (1) 1000000010" source="38992" target="39001" cy:directed="1"/>
      <edge id="43073" label="1010000010 (1) 1110000010" source="38992" target="38988" cy:directed="1"/>
      <edge id="43072" label="1110000000 (1) 1110000010" source="38991" target="38988" cy:directed="1"/>
      <edge id="43071" label="1110000000 (1) 1100000000" source="38991" target="38999" cy:directed="1"/>
      <edge id="43070" label="0010000000 (1) 0010000010" source="38990" target="38989" cy:directed="1"/>
      <edge id="43069" label="0010000000 (1) 0000000000" source="38990" target="39005" cy:directed="1"/>
      <edge id="43068" label="0010000010 (1) 0000000010" source="38989" target="39004" cy:directed="1"/>
      <edge id="43067" label="1110000010 (1) 1100000010" source="38988" target="38998" cy:directed="1"/>
      <edge id="43066" label="0110000000 (1) 0110000010" source="38987" target="38986" cy:directed="1"/>
      <edge id="43065" label="0110000000 (1) 0100000000" source="38987" target="38996" cy:directed="1"/>
      <edge id="43064" label="0110000000 (1) 0010000000" source="38987" target="38990" cy:directed="1"/>
      <edge id="43063" label="0110000010 (1) 0100000010" source="38986" target="38995" cy:directed="1"/>
      <edge id="43062" label="0110000010 (1) 0010000010" source="38986" target="38989" cy:directed="1"/>
      <edge id="43061" label="1001000010 (1) 1101000010" source="38984" target="38983" cy:directed="1"/>
      <edge id="43060" label="1101000010 (1) 1101100010" source="38983" target="38749" cy:directed="1"/>
      <edge id="43059" label="1101100000 (1) 1101110000" source="38982" target="38939" cy:directed="1"/>
      <edge id="43058" label="0101000010 (1) 0101100010" source="38981" target="38745" cy:directed="1"/>
      <edge id="43057" label="0101000010 (1) 0001000010" source="38981" target="38985" cy:directed="1"/>
      <edge id="43056" label="0101100000 (1) 0101110000" source="38980" target="38934" cy:directed="1"/>
      <edge id="43055" label="0101100000 (1) 0001100000" source="38980" target="38962" cy:directed="1"/>
      <edge id="43054" label="1011000000 (1) 1011000010" source="38979" target="38978" cy:directed="1"/>
      <edge id="43053" label="1011000000 (1) 1010000000" source="38979" target="38993" cy:directed="1"/>
      <edge id="43052" label="1011000000 (1) 1001000000" source="38979" target="39000" cy:directed="1"/>
      <edge id="43051" label="1011000000 (1) 1111000000" source="38979" target="38977" cy:directed="1"/>
      <edge id="43050" label="1011000010 (1) 1010000010" source="38978" target="38992" cy:directed="1"/>
      <edge id="43049" label="1011000010 (1) 1001000010" source="38978" target="38984" cy:directed="1"/>
      <edge id="43048" label="1011000010 (1) 1111000010" source="38978" target="38974" cy:directed="1"/>
      <edge id="43047" label="1111000000 (1) 1111000010" source="38977" target="38974" cy:directed="1"/>
      <edge id="43046" label="1111000000 (1) 1111100000" source="38977" target="38973" cy:directed="1"/>
      <edge id="43045" label="1111000000 (1) 1110000000" source="38977" target="38991" cy:directed="1"/>
      <edge id="43044" label="1111000000 (1) 1101000000" source="38977" target="38997" cy:directed="1"/>
      <edge id="43043" label="0011000000 (1) 0011000010" source="38976" target="38975" cy:directed="1"/>
      <edge id="43042" label="0011000000 (1) 0010000000" source="38976" target="38990" cy:directed="1"/>
      <edge id="43041" label="0011000000 (1) 0001000000" source="38976" target="39003" cy:directed="1"/>
      <edge id="43040" label="0011000010 (1) 0010000010" source="38975" target="38989" cy:directed="1"/>
      <edge id="43039" label="0011000010 (1) 0001000010" source="38975" target="38985" cy:directed="1"/>
      <edge id="43038" label="1111000010 (1) 1111100010" source="38974" target="38719" cy:directed="1"/>
      <edge id="43037" label="1111000010 (1) 1110000010" source="38974" target="38988" cy:directed="1"/>
      <edge id="43036" label="1111000010 (1) 1101000010" source="38974" target="38983" cy:directed="1"/>
      <edge id="43035" label="1111100000 (1) 1111110000" source="38973" target="38921" cy:directed="1"/>
      <edge id="43034" label="1111100000 (1) 1110100000" source="38973" target="38956" cy:directed="1"/>
      <edge id="43033" label="1111100000 (1) 1101100000" source="38973" target="38982" cy:directed="1"/>
      <edge id="43032" label="0111000000 (1) 0111000010" source="38972" target="38971" cy:directed="1"/>
      <edge id="43031" label="0111000000 (1) 0111100000" source="38972" target="38970" cy:directed="1"/>
      <edge id="43030" label="0111000000 (1) 0110000000" source="38972" target="38987" cy:directed="1"/>
      <edge id="43029" label="0111000000 (1) 0101000000" source="38972" target="38994" cy:directed="1"/>
      <edge id="43028" label="0111000000 (1) 0011000000" source="38972" target="38976" cy:directed="1"/>
      <edge id="43027" label="0111000010 (1) 0111100010" source="38971" target="38715" cy:directed="1"/>
      <edge id="43026" label="0111000010 (1) 0110000010" source="38971" target="38986" cy:directed="1"/>
      <edge id="43025" label="0111000010 (1) 0101000010" source="38971" target="38981" cy:directed="1"/>
      <edge id="43024" label="0111000010 (1) 0011000010" source="38971" target="38975" cy:directed="1"/>
      <edge id="43023" label="0111100000 (1) 0111110000" source="38970" target="38917" cy:directed="1"/>
      <edge id="43022" label="0111100000 (1) 0110100000" source="38970" target="38953" cy:directed="1"/>
      <edge id="43021" label="0111100000 (1) 0101100000" source="38970" target="38980" cy:directed="1"/>
      <edge id="43020" label="0111100000 (1) 0011100000" source="38970" target="38944" cy:directed="1"/>
      <edge id="43019" label="1000100000 (1) 1000110000" source="38969" target="38968" cy:directed="1"/>
      <edge id="43018" label="1000100000 (1) 1000000000" source="38969" target="39002" cy:directed="1"/>
      <edge id="43017" label="1000100000 (1) 1001100000" source="38969" target="38967" cy:directed="1"/>
      <edge id="43016" label="1000100000 (1) 1010100000" source="38969" target="38966" cy:directed="1"/>
      <edge id="43015" label="1000100000 (1) 1100100000" source="38969" target="38965" cy:directed="1"/>
      <edge id="43014" label="1000110000 (1) 1000111000" source="38968" target="38876" cy:directed="1"/>
      <edge id="43013" label="1000110000 (1) 1000010000" source="38968" target="38949" cy:directed="1"/>
      <edge id="43012" label="1000110000 (1) 1001110000" source="38968" target="38951" cy:directed="1"/>
      <edge id="43011" label="1000110000 (1) 1010110000" source="38968" target="38957" cy:directed="1"/>
      <edge id="43010" label="1001100000 (1) 1001110000" source="38967" target="38951" cy:directed="1"/>
      <edge id="43009" label="1001100000 (1) 1001000000" source="38967" target="39000" cy:directed="1"/>
      <edge id="43008" label="1001100000 (1) 1011100000" source="38967" target="38950" cy:directed="1"/>
      <edge id="43007" label="1001100000 (1) 1101100000" source="38967" target="38982" cy:directed="1"/>
      <edge id="43006" label="1010100000 (1) 1010110000" source="38966" target="38957" cy:directed="1"/>
      <edge id="43005" label="1010100000 (1) 1010000000" source="38966" target="38993" cy:directed="1"/>
      <edge id="43004" label="1010100000 (1) 1110100000" source="38966" target="38956" cy:directed="1"/>
      <edge id="43003" label="1100100000 (1) 1100110000" source="38965" target="38960" cy:directed="1"/>
      <edge id="43002" label="1100100000 (1) 1100000000" source="38965" target="38999" cy:directed="1"/>
      <edge id="43001" label="1100100000 (1) 1101100000" source="38965" target="38982" cy:directed="1"/>
      <edge id="43000" label="0000100000 (1) 0000110000" source="38964" target="38963" cy:directed="1"/>
      <edge id="42999" label="0000100000 (1) 0000000000" source="38964" target="39005" cy:directed="1"/>
      <edge id="42998" label="0000100000 (1) 0001100000" source="38964" target="38962" cy:directed="1"/>
      <edge id="42997" label="0000100000 (1) 0010100000" source="38964" target="38961" cy:directed="1"/>
      <edge id="42996" label="0000110000 (1) 0000111000" source="38963" target="38874" cy:directed="1"/>
      <edge id="42995" label="0000110000 (1) 0000010000" source="38963" target="38943" cy:directed="1"/>
      <edge id="42994" label="0000110000 (1) 0001110000" source="38963" target="38945" cy:directed="1"/>
      <edge id="42993" label="0000110000 (1) 0010110000" source="38963" target="38955" cy:directed="1"/>
      <edge id="42992" label="0001100000 (1) 0001110000" source="38962" target="38945" cy:directed="1"/>
      <edge id="42991" label="0001100000 (1) 0001000000" source="38962" target="39003" cy:directed="1"/>
      <edge id="42990" label="0001100000 (1) 0011100000" source="38962" target="38944" cy:directed="1"/>
      <edge id="42989" label="0010100000 (1) 0010110000" source="38961" target="38955" cy:directed="1"/>
      <edge id="42988" label="0010100000 (1) 0010000000" source="38961" target="38990" cy:directed="1"/>
      <edge id="42987" label="1100110000 (1) 1100111000" source="38960" target="38871" cy:directed="1"/>
      <edge id="42986" label="1100110000 (1) 1100010000" source="38960" target="38938" cy:directed="1"/>
      <edge id="42985" label="1100110000 (1) 1101110000" source="38960" target="38939" cy:directed="1"/>
      <edge id="42984" label="1100110000 (1) 1000110000" source="38960" target="38968" cy:directed="1"/>
      <edge id="42983" label="0100100000 (1) 0100110000" source="38959" target="38958" cy:directed="1"/>
      <edge id="42982" label="0100100000 (1) 0100000000" source="38959" target="38996" cy:directed="1"/>
      <edge id="42981" label="0100100000 (1) 0101100000" source="38959" target="38980" cy:directed="1"/>
      <edge id="42980" label="0100100000 (1) 0000100000" source="38959" target="38964" cy:directed="1"/>
      <edge id="42979" label="0100110000 (1) 0100111000" source="38958" target="38870" cy:directed="1"/>
      <edge id="42978" label="0100110000 (1) 0100010000" source="38958" target="38933" cy:directed="1"/>
      <edge id="42977" label="0100110000 (1) 0101110000" source="38958" target="38934" cy:directed="1"/>
      <edge id="42976" label="0100110000 (1) 0000110000" source="38958" target="38963" cy:directed="1"/>
      <edge id="42975" label="1010110000 (1) 1010111000" source="38957" target="38869" cy:directed="1"/>
      <edge id="42974" label="1010110000 (1) 1010010000" source="38957" target="38928" cy:directed="1"/>
      <edge id="42973" label="1110100000 (1) 1110110000" source="38956" target="38954" cy:directed="1"/>
      <edge id="42972" label="1110100000 (1) 1110000000" source="38956" target="38991" cy:directed="1"/>
      <edge id="42971" label="1110100000 (1) 1100100000" source="38956" target="38965" cy:directed="1"/>
      <edge id="42970" label="0010110000 (1) 0010111000" source="38955" target="38866" cy:directed="1"/>
      <edge id="42969" label="0010110000 (1) 0010010000" source="38955" target="38924" cy:directed="1"/>
      <edge id="42968" label="1110110000 (1) 1110111000" source="38954" target="38865" cy:directed="1"/>
      <edge id="42967" label="1110110000 (1) 1110010000" source="38954" target="38920" cy:directed="1"/>
      <edge id="42966" label="1110110000 (1) 1100110000" source="38954" target="38960" cy:directed="1"/>
      <edge id="42965" label="1110110000 (1) 1010110000" source="38954" target="38957" cy:directed="1"/>
      <edge id="42964" label="0110100000 (1) 0110110000" source="38953" target="38952" cy:directed="1"/>
      <edge id="42963" label="0110100000 (1) 0110000000" source="38953" target="38987" cy:directed="1"/>
      <edge id="42962" label="0110100000 (1) 0100100000" source="38953" target="38959" cy:directed="1"/>
      <edge id="42961" label="0110100000 (1) 0010100000" source="38953" target="38961" cy:directed="1"/>
      <edge id="42960" label="0110110000 (1) 0110111000" source="38952" target="38862" cy:directed="1"/>
      <edge id="42959" label="0110110000 (1) 0110010000" source="38952" target="38916" cy:directed="1"/>
      <edge id="42958" label="0110110000 (1) 0100110000" source="38952" target="38958" cy:directed="1"/>
      <edge id="42957" label="0110110000 (1) 0010110000" source="38952" target="38955" cy:directed="1"/>
      <edge id="42956" label="1001110000 (1) 1001111000" source="38951" target="38843" cy:directed="1"/>
      <edge id="42955" label="1001110000 (1) 1001010000" source="38951" target="38946" cy:directed="1"/>
      <edge id="42954" label="1001110000 (1) 1011110000" source="38951" target="38929" cy:directed="1"/>
      <edge id="42953" label="1011100000 (1) 1011110000" source="38950" target="38929" cy:directed="1"/>
      <edge id="42952" label="1011100000 (1) 1011000000" source="38950" target="38979" cy:directed="1"/>
      <edge id="42951" label="1011100000 (1) 1010100000" source="38950" target="38966" cy:directed="1"/>
      <edge id="42950" label="1011100000 (1) 1111100000" source="38950" target="38973" cy:directed="1"/>
      <edge id="42949" label="1000010000 (1) 1000010010" source="38949" target="38948" cy:directed="1"/>
      <edge id="42948" label="1000010000 (1) 1000011000" source="38949" target="38947" cy:directed="1"/>
      <edge id="42947" label="1000010000 (1) 1000000000" source="38949" target="39002" cy:directed="1"/>
      <edge id="42946" label="1000010000 (1) 1001010000" source="38949" target="38946" cy:directed="1"/>
      <edge id="42945" label="1000010010 (1) 1000000010" source="38948" target="39001" cy:directed="1"/>
      <edge id="42944" label="1000010010 (1) 1001010010" source="38948" target="38913" cy:directed="1"/>
      <edge id="42943" label="1000011000 (1) 1000011010" source="38947" target="38793" cy:directed="1"/>
      <edge id="42942" label="1000011000 (1) 1000011100" source="38947" target="38792" cy:directed="1"/>
      <edge id="42941" label="1000011000 (1) 1000001000" source="38947" target="38905" cy:directed="1"/>
      <edge id="42940" label="1000011000 (1) 1001011000" source="38947" target="38912" cy:directed="1"/>
      <edge id="42939" label="1001010000 (1) 1001010010" source="38946" target="38913" cy:directed="1"/>
      <edge id="42938" label="1001010000 (1) 1001011000" source="38946" target="38912" cy:directed="1"/>
      <edge id="42937" label="1001010000 (1) 1001000000" source="38946" target="39000" cy:directed="1"/>
      <edge id="42936" label="0001110000 (1) 0001111000" source="38945" target="38837" cy:directed="1"/>
      <edge id="42935" label="0001110000 (1) 0001010000" source="38945" target="38940" cy:directed="1"/>
      <edge id="42934" label="0001110000 (1) 0011110000" source="38945" target="38925" cy:directed="1"/>
      <edge id="42933" label="0011100000 (1) 0011110000" source="38944" target="38925" cy:directed="1"/>
      <edge id="42932" label="0011100000 (1) 0011000000" source="38944" target="38976" cy:directed="1"/>
      <edge id="42931" label="0011100000 (1) 0010100000" source="38944" target="38961" cy:directed="1"/>
      <edge id="42930" label="0000010000 (1) 0000010010" source="38943" target="38942" cy:directed="1"/>
      <edge id="42929" label="0000010000 (1) 0000011000" source="38943" target="38941" cy:directed="1"/>
      <edge id="42928" label="0000010000 (1) 0000000000" source="38943" target="39005" cy:directed="1"/>
      <edge id="42927" label="0000010000 (1) 0001010000" source="38943" target="38940" cy:directed="1"/>
      <edge id="42926" label="0000010010 (1) 0000000010" source="38942" target="39004" cy:directed="1"/>
      <edge id="42925" label="0000010010 (1) 0001010010" source="38942" target="38911" cy:directed="1"/>
      <edge id="42924" label="0000011000 (1) 0000011010" source="38941" target="38791" cy:directed="1"/>
      <edge id="42923" label="0000011000 (1) 0000011100" source="38941" target="38790" cy:directed="1"/>
      <edge id="42922" label="0000011000 (1) 0000001000" source="38941" target="38901" cy:directed="1"/>
      <edge id="42921" label="0000011000 (1) 0001011000" source="38941" target="38910" cy:directed="1"/>
      <edge id="42920" label="0001010000 (1) 0001010010" source="38940" target="38911" cy:directed="1"/>
      <edge id="42919" label="0001010000 (1) 0001011000" source="38940" target="38910" cy:directed="1"/>
      <edge id="42918" label="0001010000 (1) 0001000000" source="38940" target="39003" cy:directed="1"/>
      <edge id="42917" label="1101110000 (1) 1101111000" source="38939" target="38829" cy:directed="1"/>
      <edge id="42916" label="1101110000 (1) 1001110000" source="38939" target="38951" cy:directed="1"/>
      <edge id="42915" label="1100010000 (1) 1100010010" source="38938" target="38937" cy:directed="1"/>
      <edge id="42914" label="1100010000 (1) 1100011000" source="38938" target="38936" cy:directed="1"/>
      <edge id="42913" label="1100010000 (1) 1100000000" source="38938" target="38999" cy:directed="1"/>
      <edge id="42912" label="1100010000 (1) 1101010000" source="38938" target="38935" cy:directed="1"/>
      <edge id="42911" label="1100010000 (1) 1000010000" source="38938" target="38949" cy:directed="1"/>
      <edge id="42910" label="1100010010 (1) 1100000010" source="38937" target="38998" cy:directed="1"/>
      <edge id="42909" label="1100010010 (1) 1101010010" source="38937" target="38909" cy:directed="1"/>
      <edge id="42908" label="1100010010 (1) 1000010010" source="38937" target="38948" cy:directed="1"/>
      <edge id="42907" label="1100011000 (1) 1100011010" source="38936" target="38784" cy:directed="1"/>
      <edge id="42906" label="1100011000 (1) 1100011100" source="38936" target="38783" cy:directed="1"/>
      <edge id="42905" label="1100011000 (1) 1100001000" source="38936" target="38902" cy:directed="1"/>
      <edge id="42904" label="1100011000 (1) 1101011000" source="38936" target="38908" cy:directed="1"/>
      <edge id="42903" label="1100011000 (1) 1000011000" source="38936" target="38947" cy:directed="1"/>
      <edge id="42902" label="1101010000 (1) 1101010010" source="38935" target="38909" cy:directed="1"/>
      <edge id="42901" label="1101010000 (1) 1101011000" source="38935" target="38908" cy:directed="1"/>
      <edge id="42900" label="1101010000 (1) 1101000000" source="38935" target="38997" cy:directed="1"/>
      <edge id="42899" label="1101010000 (1) 1101110000" source="38935" target="38939" cy:directed="1"/>
      <edge id="42898" label="1101010000 (1) 1001010000" source="38935" target="38946" cy:directed="1"/>
      <edge id="42897" label="0101110000 (1) 0101111000" source="38934" target="38828" cy:directed="1"/>
      <edge id="42896" label="0101110000 (1) 0001110000" source="38934" target="38945" cy:directed="1"/>
      <edge id="42895" label="0100010000 (1) 0100010010" source="38933" target="38932" cy:directed="1"/>
      <edge id="42894" label="0100010000 (1) 0100011000" source="38933" target="38931" cy:directed="1"/>
      <edge id="42893" label="0100010000 (1) 0100000000" source="38933" target="38996" cy:directed="1"/>
      <edge id="42892" label="0100010000 (1) 0101010000" source="38933" target="38930" cy:directed="1"/>
      <edge id="42891" label="0100010000 (1) 0000010000" source="38933" target="38943" cy:directed="1"/>
      <edge id="42890" label="0100010010 (1) 0100000010" source="38932" target="38995" cy:directed="1"/>
      <edge id="42889" label="0100010010 (1) 0101010010" source="38932" target="38907" cy:directed="1"/>
      <edge id="42888" label="0100010010 (1) 0000010010" source="38932" target="38942" cy:directed="1"/>
      <edge id="42887" label="0100011000 (1) 0100011010" source="38931" target="38780" cy:directed="1"/>
      <edge id="42886" label="0100011000 (1) 0100011100" source="38931" target="38779" cy:directed="1"/>
      <edge id="42885" label="0100011000 (1) 0100001000" source="38931" target="38896" cy:directed="1"/>
      <edge id="42884" label="0100011000 (1) 0101011000" source="38931" target="38906" cy:directed="1"/>
      <edge id="42883" label="0100011000 (1) 0000011000" source="38931" target="38941" cy:directed="1"/>
      <edge id="42882" label="0101010000 (1) 0101010010" source="38930" target="38907" cy:directed="1"/>
      <edge id="42881" label="0101010000 (1) 0101011000" source="38930" target="38906" cy:directed="1"/>
      <edge id="42880" label="0101010000 (1) 0101000000" source="38930" target="38994" cy:directed="1"/>
      <edge id="42879" label="0101010000 (1) 0101110000" source="38930" target="38934" cy:directed="1"/>
      <edge id="42878" label="0101010000 (1) 0001010000" source="38930" target="38940" cy:directed="1"/>
      <edge id="42877" label="1011110000 (1) 1011111000" source="38929" target="38814" cy:directed="1"/>
      <edge id="42876" label="1011110000 (1) 1011010000" source="38929" target="38893" cy:directed="1"/>
      <edge id="42875" label="1011110000 (1) 1010110000" source="38929" target="38957" cy:directed="1"/>
      <edge id="42874" label="1010010000 (1) 1010010010" source="38928" target="38927" cy:directed="1"/>
      <edge id="42873" label="1010010000 (1) 1010011000" source="38928" target="38926" cy:directed="1"/>
      <edge id="42872" label="1010010000 (1) 1010000000" source="38928" target="38993" cy:directed="1"/>
      <edge id="42871" label="1010010000 (1) 1000010000" source="38928" target="38949" cy:directed="1"/>
      <edge id="42870" label="1010010010 (1) 1010000010" source="38927" target="38992" cy:directed="1"/>
      <edge id="42869" label="1010010010 (1) 1000010010" source="38927" target="38948" cy:directed="1"/>
      <edge id="42868" label="1010011000 (1) 1010011010" source="38926" target="38772" cy:directed="1"/>
      <edge id="42867" label="1010011000 (1) 1010011100" source="38926" target="38771" cy:directed="1"/>
      <edge id="42866" label="1010011000 (1) 1010001000" source="38926" target="38881" cy:directed="1"/>
      <edge id="42865" label="1010011000 (1) 1000011000" source="38926" target="38947" cy:directed="1"/>
      <edge id="42864" label="0011110000 (1) 0011111000" source="38925" target="38811" cy:directed="1"/>
      <edge id="42863" label="0011110000 (1) 0011010000" source="38925" target="38890" cy:directed="1"/>
      <edge id="42862" label="0011110000 (1) 0010110000" source="38925" target="38955" cy:directed="1"/>
      <edge id="42861" label="0010010000 (1) 0010010010" source="38924" target="38923" cy:directed="1"/>
      <edge id="42860" label="0010010000 (1) 0010011000" source="38924" target="38922" cy:directed="1"/>
      <edge id="42859" label="0010010000 (1) 0010000000" source="38924" target="38990" cy:directed="1"/>
      <edge id="42858" label="0010010000 (1) 0000010000" source="38924" target="38943" cy:directed="1"/>
      <edge id="42857" label="0010010010 (1) 0010000010" source="38923" target="38989" cy:directed="1"/>
      <edge id="42856" label="0010010010 (1) 0000010010" source="38923" target="38942" cy:directed="1"/>
      <edge id="42855" label="0010011000 (1) 0010011010" source="38922" target="38770" cy:directed="1"/>
      <edge id="42854" label="0010011000 (1) 0010011100" source="38922" target="38769" cy:directed="1"/>
      <edge id="42853" label="0010011000 (1) 0010001000" source="38922" target="38878" cy:directed="1"/>
      <edge id="42852" label="0010011000 (1) 0000011000" source="38922" target="38941" cy:directed="1"/>
      <edge id="42851" label="1111110000 (1) 1111111000" source="38921" target="38807" cy:directed="1"/>
      <edge id="42850" label="1111110000 (1) 1110110000" source="38921" target="38954" cy:directed="1"/>
      <edge id="42849" label="1111110000 (1) 1101110000" source="38921" target="38939" cy:directed="1"/>
      <edge id="42848" label="1111110000 (1) 1011110000" source="38921" target="38929" cy:directed="1"/>
      <edge id="42847" label="1110010000 (1) 1110010010" source="38920" target="38919" cy:directed="1"/>
      <edge id="42846" label="1110010000 (1) 1110011000" source="38920" target="38918" cy:directed="1"/>
      <edge id="42845" label="1110010000 (1) 1110000000" source="38920" target="38991" cy:directed="1"/>
      <edge id="42844" label="1110010000 (1) 1100010000" source="38920" target="38938" cy:directed="1"/>
      <edge id="42843" label="1110010000 (1) 1010010000" source="38920" target="38928" cy:directed="1"/>
      <edge id="42842" label="1110010010 (1) 1110000010" source="38919" target="38988" cy:directed="1"/>
      <edge id="42841" label="1110010010 (1) 1100010010" source="38919" target="38937" cy:directed="1"/>
      <edge id="42840" label="1110010010 (1) 1010010010" source="38919" target="38927" cy:directed="1"/>
      <edge id="42839" label="1110011000 (1) 1110011010" source="38918" target="38767" cy:directed="1"/>
      <edge id="42838" label="1110011000 (1) 1110011100" source="38918" target="38766" cy:directed="1"/>
      <edge id="42837" label="1110011000 (1) 1110001000" source="38918" target="38879" cy:directed="1"/>
      <edge id="42836" label="1110011000 (1) 1100011000" source="38918" target="38936" cy:directed="1"/>
      <edge id="42835" label="1110011000 (1) 1010011000" source="38918" target="38926" cy:directed="1"/>
      <edge id="42834" label="0111110000 (1) 0111111000" source="38917" target="38806" cy:directed="1"/>
      <edge id="42833" label="0111110000 (1) 0110110000" source="38917" target="38952" cy:directed="1"/>
      <edge id="42832" label="0111110000 (1) 0101110000" source="38917" target="38934" cy:directed="1"/>
      <edge id="42831" label="0111110000 (1) 0011110000" source="38917" target="38925" cy:directed="1"/>
      <edge id="42830" label="0110010000 (1) 0110010010" source="38916" target="38915" cy:directed="1"/>
      <edge id="42829" label="0110010000 (1) 0110011000" source="38916" target="38914" cy:directed="1"/>
      <edge id="42828" label="0110010000 (1) 0110000000" source="38916" target="38987" cy:directed="1"/>
      <edge id="42827" label="0110010000 (1) 0100010000" source="38916" target="38933" cy:directed="1"/>
      <edge id="42826" label="0110010000 (1) 0010010000" source="38916" target="38924" cy:directed="1"/>
      <edge id="42825" label="0110010010 (1) 0110000010" source="38915" target="38986" cy:directed="1"/>
      <edge id="42824" label="0110010010 (1) 0100010010" source="38915" target="38932" cy:directed="1"/>
      <edge id="42823" label="0110010010 (1) 0010010010" source="38915" target="38923" cy:directed="1"/>
      <edge id="42822" label="0110011000 (1) 0110011010" source="38914" target="38764" cy:directed="1"/>
      <edge id="42821" label="0110011000 (1) 0110011100" source="38914" target="38763" cy:directed="1"/>
      <edge id="42820" label="0110011000 (1) 0110001000" source="38914" target="38873" cy:directed="1"/>
      <edge id="42819" label="0110011000 (1) 0100011000" source="38914" target="38931" cy:directed="1"/>
      <edge id="42818" label="0110011000 (1) 0010011000" source="38914" target="38922" cy:directed="1"/>
      <edge id="42817" label="1001010010 (1) 1001000010" source="38913" target="38984" cy:directed="1"/>
      <edge id="42816" label="1001011000 (1) 1001011010" source="38912" target="38759" cy:directed="1"/>
      <edge id="42815" label="1001011000 (1) 1001011100" source="38912" target="38758" cy:directed="1"/>
      <edge id="42814" label="1001011000 (1) 1001001000" source="38912" target="38903" cy:directed="1"/>
      <edge id="42813" label="0001010010 (1) 0001000010" source="38911" target="38985" cy:directed="1"/>
      <edge id="42812" label="0001011000 (1) 0001011010" source="38910" target="38756" cy:directed="1"/>
      <edge id="42811" label="0001011000 (1) 0001011100" source="38910" target="38755" cy:directed="1"/>
      <edge id="42810" label="0001011000 (1) 0001001000" source="38910" target="38899" cy:directed="1"/>
      <edge id="42809" label="1101010010 (1) 1101000010" source="38909" target="38983" cy:directed="1"/>
      <edge id="42808" label="1101010010 (1) 1101110010" source="38909" target="38617" cy:directed="1"/>
      <edge id="42807" label="1101010010 (1) 1001010010" source="38909" target="38913" cy:directed="1"/>
      <edge id="42806" label="1101011000 (1) 1101011010" source="38908" target="38753" cy:directed="1"/>
      <edge id="42805" label="1101011000 (1) 1101011100" source="38908" target="38752" cy:directed="1"/>
      <edge id="42804" label="1101011000 (1) 1101001000" source="38908" target="38897" cy:directed="1"/>
      <edge id="42803" label="1101011000 (1) 1101111000" source="38908" target="38829" cy:directed="1"/>
      <edge id="42802" label="1101011000 (1) 1001011000" source="38908" target="38912" cy:directed="1"/>
      <edge id="42801" label="0101010010 (1) 0101000010" source="38907" target="38981" cy:directed="1"/>
      <edge id="42800" label="0101010010 (1) 0101110010" source="38907" target="38608" cy:directed="1"/>
      <edge id="42799" label="0101010010 (1) 0001010010" source="38907" target="38911" cy:directed="1"/>
      <edge id="42798" label="0101011000 (1) 0101011010" source="38906" target="38751" cy:directed="1"/>
      <edge id="42797" label="0101011000 (1) 0101011100" source="38906" target="38750" cy:directed="1"/>
      <edge id="42796" label="0101011000 (1) 0101001000" source="38906" target="38894" cy:directed="1"/>
      <edge id="42795" label="0101011000 (1) 0101111000" source="38906" target="38828" cy:directed="1"/>
      <edge id="42794" label="0101011000 (1) 0001011000" source="38906" target="38910" cy:directed="1"/>
      <edge id="42793" label="1000001000 (1) 1000001010" source="38905" target="38904" cy:directed="1"/>
      <edge id="42792" label="1000001000 (1) 1000000000" source="38905" target="39002" cy:directed="1"/>
      <edge id="42791" label="1000001000 (1) 1001001000" source="38905" target="38903" cy:directed="1"/>
      <edge id="42790" label="1000001000 (1) 1100001000" source="38905" target="38902" cy:directed="1"/>
      <edge id="42789" label="1000001010 (1) 1000000010" source="38904" target="39001" cy:directed="1"/>
      <edge id="42788" label="1000001010 (1) 1001001010" source="38904" target="38868" cy:directed="1"/>
      <edge id="42787" label="1000001010 (1) 1100001010" source="38904" target="38898" cy:directed="1"/>
      <edge id="42786" label="1001001000 (1) 1001001010" source="38903" target="38868" cy:directed="1"/>
      <edge id="42785" label="1001001000 (1) 1001000000" source="38903" target="39000" cy:directed="1"/>
      <edge id="42784" label="1001001000 (1) 1101001000" source="38903" target="38897" cy:directed="1"/>
      <edge id="42783" label="1100001000 (1) 1100001010" source="38902" target="38898" cy:directed="1"/>
      <edge id="42782" label="1100001000 (1) 1100000000" source="38902" target="38999" cy:directed="1"/>
      <edge id="42781" label="1100001000 (1) 1101001000" source="38902" target="38897" cy:directed="1"/>
      <edge id="42780" label="0000001000 (1) 0000001010" source="38901" target="38900" cy:directed="1"/>
      <edge id="42779" label="0000001000 (1) 0000000000" source="38901" target="39005" cy:directed="1"/>
      <edge id="42778" label="0000001000 (1) 0001001000" source="38901" target="38899" cy:directed="1"/>
      <edge id="42777" label="0000001010 (1) 0000000010" source="38900" target="39004" cy:directed="1"/>
      <edge id="42776" label="0000001010 (1) 0001001010" source="38900" target="38867" cy:directed="1"/>
      <edge id="42775" label="0001001000 (1) 0001001010" source="38899" target="38867" cy:directed="1"/>
      <edge id="42774" label="0001001000 (1) 0001000000" source="38899" target="39003" cy:directed="1"/>
      <edge id="42773" label="1100001010 (1) 1100000010" source="38898" target="38998" cy:directed="1"/>
      <edge id="42772" label="1100001010 (1) 1101001010" source="38898" target="38864" cy:directed="1"/>
      <edge id="42771" label="1101001000 (1) 1101001010" source="38897" target="38864" cy:directed="1"/>
      <edge id="42770" label="1101001000 (1) 1101000000" source="38897" target="38997" cy:directed="1"/>
      <edge id="42769" label="1101001000 (1) 1101101000" source="38897" target="38863" cy:directed="1"/>
      <edge id="42768" label="0100001000 (1) 0100001010" source="38896" target="38895" cy:directed="1"/>
      <edge id="42767" label="0100001000 (1) 0100000000" source="38896" target="38996" cy:directed="1"/>
      <edge id="42766" label="0100001000 (1) 0101001000" source="38896" target="38894" cy:directed="1"/>
      <edge id="42765" label="0100001000 (1) 0000001000" source="38896" target="38901" cy:directed="1"/>
      <edge id="42764" label="0100001010 (1) 0100000010" source="38895" target="38995" cy:directed="1"/>
      <edge id="42763" label="0100001010 (1) 0101001010" source="38895" target="38861" cy:directed="1"/>
      <edge id="42762" label="0100001010 (1) 0000001010" source="38895" target="38900" cy:directed="1"/>
      <edge id="42761" label="0101001000 (1) 0101001010" source="38894" target="38861" cy:directed="1"/>
      <edge id="42760" label="0101001000 (1) 0101000000" source="38894" target="38994" cy:directed="1"/>
      <edge id="42759" label="0101001000 (1) 0101101000" source="38894" target="38860" cy:directed="1"/>
      <edge id="42758" label="0101001000 (1) 0001001000" source="38894" target="38899" cy:directed="1"/>
      <edge id="42757" label="1011010000 (1) 1011010010" source="38893" target="38892" cy:directed="1"/>
      <edge id="42756" label="1011010000 (1) 1011011000" source="38893" target="38891" cy:directed="1"/>
      <edge id="42755" label="1011010000 (1) 1011000000" source="38893" target="38979" cy:directed="1"/>
      <edge id="42754" label="1011010000 (1) 1010010000" source="38893" target="38928" cy:directed="1"/>
      <edge id="42753" label="1011010000 (1) 1001010000" source="38893" target="38946" cy:directed="1"/>
      <edge id="42752" label="1011010010 (1) 1011000010" source="38892" target="38978" cy:directed="1"/>
      <edge id="42751" label="1011010010 (1) 1010010010" source="38892" target="38927" cy:directed="1"/>
      <edge id="42750" label="1011010010 (1) 1001010010" source="38892" target="38913" cy:directed="1"/>
      <edge id="42749" label="1011011000 (1) 1011011010" source="38891" target="38747" cy:directed="1"/>
      <edge id="42748" label="1011011000 (1) 1011011100" source="38891" target="38746" cy:directed="1"/>
      <edge id="42747" label="1011011000 (1) 1011001000" source="38891" target="38853" cy:directed="1"/>
      <edge id="42746" label="1011011000 (1) 1010011000" source="38891" target="38926" cy:directed="1"/>
      <edge id="42745" label="1011011000 (1) 1001011000" source="38891" target="38912" cy:directed="1"/>
      <edge id="42744" label="0011010000 (1) 0011010010" source="38890" target="38889" cy:directed="1"/>
      <edge id="42743" label="0011010000 (1) 0011011000" source="38890" target="38888" cy:directed="1"/>
      <edge id="42742" label="0011010000 (1) 0011000000" source="38890" target="38976" cy:directed="1"/>
      <edge id="42741" label="0011010000 (1) 0010010000" source="38890" target="38924" cy:directed="1"/>
      <edge id="42740" label="0011010000 (1) 0001010000" source="38890" target="38940" cy:directed="1"/>
      <edge id="42739" label="0011010010 (1) 0011000010" source="38889" target="38975" cy:directed="1"/>
      <edge id="42738" label="0011010010 (1) 0010010010" source="38889" target="38923" cy:directed="1"/>
      <edge id="42737" label="0011010010 (1) 0001010010" source="38889" target="38911" cy:directed="1"/>
      <edge id="42736" label="0011011000 (1) 0011011010" source="38888" target="38743" cy:directed="1"/>
      <edge id="42735" label="0011011000 (1) 0011011100" source="38888" target="38742" cy:directed="1"/>
      <edge id="42734" label="0011011000 (1) 0011001000" source="38888" target="38845" cy:directed="1"/>
      <edge id="42733" label="0011011000 (1) 0010011000" source="38888" target="38922" cy:directed="1"/>
      <edge id="42732" label="0011011000 (1) 0001011000" source="38888" target="38910" cy:directed="1"/>
      <edge id="42731" label="0111010000 (1) 0111010010" source="38887" target="38886" cy:directed="1"/>
      <edge id="42730" label="0111010000 (1) 0111011000" source="38887" target="38885" cy:directed="1"/>
      <edge id="42729" label="0111010000 (1) 0111000000" source="38887" target="38972" cy:directed="1"/>
      <edge id="42728" label="0111010000 (1) 0111110000" source="38887" target="38917" cy:directed="1"/>
      <edge id="42727" label="0111010000 (1) 0110010000" source="38887" target="38916" cy:directed="1"/>
      <edge id="42726" label="0111010000 (1) 0101010000" source="38887" target="38930" cy:directed="1"/>
      <edge id="42725" label="0111010000 (1) 0011010000" source="38887" target="38890" cy:directed="1"/>
      <edge id="42724" label="0111010010 (1) 0111000010" source="38886" target="38971" cy:directed="1"/>
      <edge id="42723" label="0111010010 (1) 0111110010" source="38886" target="38589" cy:directed="1"/>
      <edge id="42722" label="0111010010 (1) 0110010010" source="38886" target="38915" cy:directed="1"/>
      <edge id="42721" label="0111010010 (1) 0101010010" source="38886" target="38907" cy:directed="1"/>
      <edge id="42720" label="0111010010 (1) 0011010010" source="38886" target="38889" cy:directed="1"/>
      <edge id="42719" label="0111011000 (1) 0111011010" source="38885" target="38731" cy:directed="1"/>
      <edge id="42718" label="0111011000 (1) 0111011100" source="38885" target="38730" cy:directed="1"/>
      <edge id="42717" label="0111011000 (1) 0111001000" source="38885" target="38832" cy:directed="1"/>
      <edge id="42716" label="0111011000 (1) 0111111000" source="38885" target="38806" cy:directed="1"/>
      <edge id="42715" label="0111011000 (1) 0110011000" source="38885" target="38914" cy:directed="1"/>
      <edge id="42714" label="0111011000 (1) 0101011000" source="38885" target="38906" cy:directed="1"/>
      <edge id="42713" label="0111011000 (1) 0011011000" source="38885" target="38888" cy:directed="1"/>
      <edge id="42712" label="1111010000 (1) 1111010010" source="38884" target="38883" cy:directed="1"/>
      <edge id="42711" label="1111010000 (1) 1111011000" source="38884" target="38882" cy:directed="1"/>
      <edge id="42710" label="1111010000 (1) 1111000000" source="38884" target="38977" cy:directed="1"/>
      <edge id="42709" label="1111010000 (1) 1111110000" source="38884" target="38921" cy:directed="1"/>
      <edge id="42708" label="1111010000 (1) 1110010000" source="38884" target="38920" cy:directed="1"/>
      <edge id="42707" label="1111010000 (1) 1101010000" source="38884" target="38935" cy:directed="1"/>
      <edge id="42706" label="1111010000 (1) 1011010000" source="38884" target="38893" cy:directed="1"/>
      <edge id="42705" label="1111010010 (1) 1111000010" source="38883" target="38974" cy:directed="1"/>
      <edge id="42704" label="1111010010 (1) 1111110010" source="38883" target="38597" cy:directed="1"/>
      <edge id="42703" label="1111010010 (1) 1110010010" source="38883" target="38919" cy:directed="1"/>
      <edge id="42702" label="1111010010 (1) 1101010010" source="38883" target="38909" cy:directed="1"/>
      <edge id="42701" label="1111010010 (1) 1011010010" source="38883" target="38892" cy:directed="1"/>
      <edge id="42700" label="1111011000 (1) 1111011010" source="38882" target="38729" cy:directed="1"/>
      <edge id="42699" label="1111011000 (1) 1111011100" source="38882" target="38728" cy:directed="1"/>
      <edge id="42698" label="1111011000 (1) 1111001000" source="38882" target="38851" cy:directed="1"/>
      <edge id="42697" label="1111011000 (1) 1111111000" source="38882" target="38807" cy:directed="1"/>
      <edge id="42696" label="1111011000 (1) 1110011000" source="38882" target="38918" cy:directed="1"/>
      <edge id="42695" label="1111011000 (1) 1101011000" source="38882" target="38908" cy:directed="1"/>
      <edge id="42694" label="1111011000 (1) 1011011000" source="38882" target="38891" cy:directed="1"/>
      <edge id="42693" label="1010001000 (1) 1010001010" source="38881" target="38880" cy:directed="1"/>
      <edge id="42692" label="1010001000 (1) 1010000000" source="38881" target="38993" cy:directed="1"/>
      <edge id="42691" label="1010001000 (1) 1000001000" source="38881" target="38905" cy:directed="1"/>
      <edge id="42690" label="1010001000 (1) 1110001000" source="38881" target="38879" cy:directed="1"/>
      <edge id="42689" label="1010001010 (1) 1010000010" source="38880" target="38992" cy:directed="1"/>
      <edge id="42688" label="1010001010 (1) 1000001010" source="38880" target="38904" cy:directed="1"/>
      <edge id="42687" label="1010001010 (1) 1110001010" source="38880" target="38875" cy:directed="1"/>
      <edge id="42686" label="1110001000 (1) 1110001010" source="38879" target="38875" cy:directed="1"/>
      <edge id="42685" label="1110001000 (1) 1110000000" source="38879" target="38991" cy:directed="1"/>
      <edge id="42684" label="1110001000 (1) 1100001000" source="38879" target="38902" cy:directed="1"/>
      <edge id="42683" label="0010001000 (1) 0010001010" source="38878" target="38877" cy:directed="1"/>
      <edge id="42682" label="0010001000 (1) 0010000000" source="38878" target="38990" cy:directed="1"/>
      <edge id="42681" label="0010001000 (1) 0000001000" source="38878" target="38901" cy:directed="1"/>
      <edge id="42680" label="0010001010 (1) 0010000010" source="38877" target="38989" cy:directed="1"/>
      <edge id="42679" label="0010001010 (1) 0000001010" source="38877" target="38900" cy:directed="1"/>
      <edge id="42678" label="1000111000 (1) 1000111100" source="38876" target="38721" cy:directed="1"/>
      <edge id="42677" label="1000111000 (1) 1000011000" source="38876" target="38947" cy:directed="1"/>
      <edge id="42676" label="1000111000 (1) 1001111000" source="38876" target="38843" cy:directed="1"/>
      <edge id="42675" label="1000111000 (1) 1010111000" source="38876" target="38869" cy:directed="1"/>
      <edge id="42674" label="1110001010 (1) 1110000010" source="38875" target="38988" cy:directed="1"/>
      <edge id="42673" label="1110001010 (1) 1100001010" source="38875" target="38898" cy:directed="1"/>
      <edge id="42672" label="0000111000 (1) 0000111100" source="38874" target="38720" cy:directed="1"/>
      <edge id="42671" label="0000111000 (1) 0000011000" source="38874" target="38941" cy:directed="1"/>
      <edge id="42670" label="0000111000 (1) 0001111000" source="38874" target="38837" cy:directed="1"/>
      <edge id="42669" label="0000111000 (1) 0010111000" source="38874" target="38866" cy:directed="1"/>
      <edge id="42668" label="0110001000 (1) 0110001010" source="38873" target="38872" cy:directed="1"/>
      <edge id="42667" label="0110001000 (1) 0110000000" source="38873" target="38987" cy:directed="1"/>
      <edge id="42666" label="0110001000 (1) 0100001000" source="38873" target="38896" cy:directed="1"/>
      <edge id="42665" label="0110001000 (1) 0010001000" source="38873" target="38878" cy:directed="1"/>
      <edge id="42664" label="0110001010 (1) 0110000010" source="38872" target="38986" cy:directed="1"/>
      <edge id="42663" label="0110001010 (1) 0100001010" source="38872" target="38895" cy:directed="1"/>
      <edge id="42662" label="0110001010 (1) 0010001010" source="38872" target="38877" cy:directed="1"/>
      <edge id="42661" label="1100111000 (1) 1100111100" source="38871" target="38718" cy:directed="1"/>
      <edge id="42660" label="1100111000 (1) 1100011000" source="38871" target="38936" cy:directed="1"/>
      <edge id="42659" label="1100111000 (1) 1101111000" source="38871" target="38829" cy:directed="1"/>
      <edge id="42658" label="1100111000 (1) 1000111000" source="38871" target="38876" cy:directed="1"/>
      <edge id="42657" label="0100111000 (1) 0100111100" source="38870" target="38714" cy:directed="1"/>
      <edge id="42656" label="0100111000 (1) 0100011000" source="38870" target="38931" cy:directed="1"/>
      <edge id="42655" label="0100111000 (1) 0101111000" source="38870" target="38828" cy:directed="1"/>
      <edge id="42654" label="0100111000 (1) 0000111000" source="38870" target="38874" cy:directed="1"/>
      <edge id="42653" label="1010111000 (1) 1010111100" source="38869" target="38696" cy:directed="1"/>
      <edge id="42652" label="1010111000 (1) 1010011000" source="38869" target="38926" cy:directed="1"/>
      <edge id="42651" label="1001001010 (1) 1001000010" source="38868" target="38984" cy:directed="1"/>
      <edge id="42650" label="1001001010 (1) 1101001010" source="38868" target="38864" cy:directed="1"/>
      <edge id="42649" label="0001001010 (1) 0001000010" source="38867" target="38985" cy:directed="1"/>
      <edge id="42648" label="0010111000 (1) 0010111100" source="38866" target="38694" cy:directed="1"/>
      <edge id="42647" label="0010111000 (1) 0010011000" source="38866" target="38922" cy:directed="1"/>
      <edge id="42646" label="1110111000 (1) 1110111100" source="38865" target="38682" cy:directed="1"/>
      <edge id="42645" label="1110111000 (1) 1110011000" source="38865" target="38918" cy:directed="1"/>
      <edge id="42644" label="1110111000 (1) 1100111000" source="38865" target="38871" cy:directed="1"/>
      <edge id="42643" label="1110111000 (1) 1010111000" source="38865" target="38869" cy:directed="1"/>
      <edge id="42642" label="1101001010 (1) 1101000010" source="38864" target="38983" cy:directed="1"/>
      <edge id="42641" label="1101001010 (1) 1101101010" source="38864" target="38499" cy:directed="1"/>
      <edge id="42640" label="1101101000 (1) 1101100000" source="38863" target="38982" cy:directed="1"/>
      <edge id="42639" label="1101101000 (1) 1101111000" source="38863" target="38829" cy:directed="1"/>
      <edge id="42638" label="0110111000 (1) 0110111100" source="38862" target="38681" cy:directed="1"/>
      <edge id="42637" label="0110111000 (1) 0110011000" source="38862" target="38914" cy:directed="1"/>
      <edge id="42636" label="0110111000 (1) 0100111000" source="38862" target="38870" cy:directed="1"/>
      <edge id="42635" label="0110111000 (1) 0010111000" source="38862" target="38866" cy:directed="1"/>
      <edge id="42634" label="0101001010 (1) 0101000010" source="38861" target="38981" cy:directed="1"/>
      <edge id="42633" label="0101001010 (1) 0101101010" source="38861" target="38492" cy:directed="1"/>
      <edge id="42632" label="0101001010 (1) 0001001010" source="38861" target="38867" cy:directed="1"/>
      <edge id="42631" label="0101101000 (1) 0101100000" source="38860" target="38980" cy:directed="1"/>
      <edge id="42630" label="0101101000 (1) 0101111000" source="38860" target="38828" cy:directed="1"/>
      <edge id="42629" label="0101101000 (1) 0001101000" source="38860" target="38826" cy:directed="1"/>
      <edge id="42628" label="1000000100 (1) 1000000110" source="38859" target="38858" cy:directed="1"/>
      <edge id="42627" label="1000000100 (1) 1000000000" source="38859" target="39002" cy:directed="1"/>
      <edge id="42626" label="1000000100 (1) 1000100100" source="38859" target="38857" cy:directed="1"/>
      <edge id="42625" label="1000000100 (1) 1001000100" source="38859" target="38856" cy:directed="1"/>
      <edge id="42624" label="1000000100 (1) 1010000100" source="38859" target="38855" cy:directed="1"/>
      <edge id="42623" label="1000000100 (1) 1100000100" source="38859" target="38854" cy:directed="1"/>
      <edge id="42622" label="1000000110 (1) 1000000010" source="38858" target="39001" cy:directed="1"/>
      <edge id="42621" label="1000000110 (1) 1000100110" source="38858" target="38467" cy:directed="1"/>
      <edge id="42620" label="1000000110 (1) 1001000110" source="38858" target="38803" cy:directed="1"/>
      <edge id="42619" label="1000000110 (1) 1010000110" source="38858" target="38820" cy:directed="1"/>
      <edge id="42618" label="1000000110 (1) 1100000110" source="38858" target="38842" cy:directed="1"/>
      <edge id="42617" label="1000100100 (1) 1000100000" source="38857" target="38969" cy:directed="1"/>
      <edge id="42616" label="1000100100 (1) 1000110100" source="38857" target="38773" cy:directed="1"/>
      <edge id="42615" label="1000100100 (1) 1001100100" source="38857" target="38802" cy:directed="1"/>
      <edge id="42614" label="1000100100 (1) 1010100100" source="38857" target="38819" cy:directed="1"/>
      <edge id="42613" label="1000100100 (1) 1100100100" source="38857" target="38841" cy:directed="1"/>
      <edge id="42612" label="1001000100 (1) 1001000110" source="38856" target="38803" cy:directed="1"/>
      <edge id="42611" label="1001000100 (1) 1001000000" source="38856" target="39000" cy:directed="1"/>
      <edge id="42610" label="1001000100 (1) 1001100100" source="38856" target="38802" cy:directed="1"/>
      <edge id="42609" label="1001000100 (1) 1011000100" source="38856" target="38801" cy:directed="1"/>
      <edge id="42608" label="1001000100 (1) 1101000100" source="38856" target="38840" cy:directed="1"/>
      <edge id="42607" label="1010000100 (1) 1010000110" source="38855" target="38820" cy:directed="1"/>
      <edge id="42606" label="1010000100 (1) 1010000000" source="38855" target="38993" cy:directed="1"/>
      <edge id="42605" label="1010000100 (1) 1010100100" source="38855" target="38819" cy:directed="1"/>
      <edge id="42604" label="1010000100 (1) 1110000100" source="38855" target="38818" cy:directed="1"/>
      <edge id="42603" label="1100000100 (1) 1100000110" source="38854" target="38842" cy:directed="1"/>
      <edge id="42602" label="1100000100 (1) 1100000000" source="38854" target="38999" cy:directed="1"/>
      <edge id="42601" label="1100000100 (1) 1100100100" source="38854" target="38841" cy:directed="1"/>
      <edge id="42600" label="1100000100 (1) 1101000100" source="38854" target="38840" cy:directed="1"/>
      <edge id="42599" label="1011001000 (1) 1011001010" source="38853" target="38852" cy:directed="1"/>
      <edge id="42598" label="1011001000 (1) 1011000000" source="38853" target="38979" cy:directed="1"/>
      <edge id="42597" label="1011001000 (1) 1010001000" source="38853" target="38881" cy:directed="1"/>
      <edge id="42596" label="1011001000 (1) 1001001000" source="38853" target="38903" cy:directed="1"/>
      <edge id="42595" label="1011001000 (1) 1111001000" source="38853" target="38851" cy:directed="1"/>
      <edge id="42594" label="1011001010 (1) 1011000010" source="38852" target="38978" cy:directed="1"/>
      <edge id="42593" label="1011001010 (1) 1010001010" source="38852" target="38880" cy:directed="1"/>
      <edge id="42592" label="1011001010 (1) 1001001010" source="38852" target="38868" cy:directed="1"/>
      <edge id="42591" label="1011001010 (1) 1111001010" source="38852" target="38839" cy:directed="1"/>
      <edge id="42590" label="1111001000 (1) 1111001010" source="38851" target="38839" cy:directed="1"/>
      <edge id="42589" label="1111001000 (1) 1111000000" source="38851" target="38977" cy:directed="1"/>
      <edge id="42588" label="1111001000 (1) 1111101000" source="38851" target="38838" cy:directed="1"/>
      <edge id="42587" label="1111001000 (1) 1110001000" source="38851" target="38879" cy:directed="1"/>
      <edge id="42586" label="1111001000 (1) 1101001000" source="38851" target="38897" cy:directed="1"/>
      <edge id="42585" label="0000000100 (1) 0000000110" source="38850" target="38849" cy:directed="1"/>
      <edge id="42584" label="0000000100 (1) 0000000000" source="38850" target="39005" cy:directed="1"/>
      <edge id="42583" label="0000000100 (1) 0000100100" source="38850" target="38848" cy:directed="1"/>
      <edge id="42582" label="0000000100 (1) 0001000100" source="38850" target="38847" cy:directed="1"/>
      <edge id="42581" label="0000000100 (1) 0010000100" source="38850" target="38846" cy:directed="1"/>
      <edge id="42580" label="0000000110 (1) 0000000010" source="38849" target="39004" cy:directed="1"/>
      <edge id="42579" label="0000000110 (1) 0000100110" source="38849" target="38466" cy:directed="1"/>
      <edge id="42578" label="0000000110 (1) 0001000110" source="38849" target="38800" cy:directed="1"/>
      <edge id="42577" label="0000000110 (1) 0010000110" source="38849" target="38817" cy:directed="1"/>
      <edge id="42576" label="0000100100 (1) 0000100000" source="38848" target="38964" cy:directed="1"/>
      <edge id="42575" label="0000100100 (1) 0000110100" source="38848" target="38768" cy:directed="1"/>
      <edge id="42574" label="0000100100 (1) 0001100100" source="38848" target="38799" cy:directed="1"/>
      <edge id="42573" label="0000100100 (1) 0010100100" source="38848" target="38816" cy:directed="1"/>
      <edge id="42572" label="0001000100 (1) 0001000110" source="38847" target="38800" cy:directed="1"/>
      <edge id="42571" label="0001000100 (1) 0001000000" source="38847" target="39003" cy:directed="1"/>
      <edge id="42570" label="0001000100 (1) 0001100100" source="38847" target="38799" cy:directed="1"/>
      <edge id="42569" label="0001000100 (1) 0011000100" source="38847" target="38798" cy:directed="1"/>
      <edge id="42568" label="0010000100 (1) 0010000110" source="38846" target="38817" cy:directed="1"/>
      <edge id="42567" label="0010000100 (1) 0010000000" source="38846" target="38990" cy:directed="1"/>
      <edge id="42566" label="0010000100 (1) 0010100100" source="38846" target="38816" cy:directed="1"/>
      <edge id="42565" label="0011001000 (1) 0011001010" source="38845" target="38844" cy:directed="1"/>
      <edge id="42564" label="0011001000 (1) 0011000000" source="38845" target="38976" cy:directed="1"/>
      <edge id="42563" label="0011001000 (1) 0010001000" source="38845" target="38878" cy:directed="1"/>
      <edge id="42562" label="0011001000 (1) 0001001000" source="38845" target="38899" cy:directed="1"/>
      <edge id="42561" label="0011001010 (1) 0011000010" source="38844" target="38975" cy:directed="1"/>
      <edge id="42560" label="0011001010 (1) 0010001010" source="38844" target="38877" cy:directed="1"/>
      <edge id="42559" label="0011001010 (1) 0001001010" source="38844" target="38867" cy:directed="1"/>
      <edge id="42558" label="1001111000 (1) 1001111100" source="38843" target="38645" cy:directed="1"/>
      <edge id="42557" label="1001111000 (1) 1001011000" source="38843" target="38912" cy:directed="1"/>
      <edge id="42556" label="1001111000 (1) 1011111000" source="38843" target="38814" cy:directed="1"/>
      <edge id="42555" label="1100000110 (1) 1100000010" source="38842" target="38998" cy:directed="1"/>
      <edge id="42554" label="1100000110 (1) 1100100110" source="38842" target="38464" cy:directed="1"/>
      <edge id="42553" label="1100000110 (1) 1101000110" source="38842" target="38797" cy:directed="1"/>
      <edge id="42552" label="1100100100 (1) 1100100000" source="38841" target="38965" cy:directed="1"/>
      <edge id="42551" label="1100100100 (1) 1100110100" source="38841" target="38765" cy:directed="1"/>
      <edge id="42550" label="1100100100 (1) 1101100100" source="38841" target="38796" cy:directed="1"/>
      <edge id="42549" label="1101000100 (1) 1101000110" source="38840" target="38797" cy:directed="1"/>
      <edge id="42548" label="1101000100 (1) 1101000000" source="38840" target="38997" cy:directed="1"/>
      <edge id="42547" label="1101000100 (1) 1101100100" source="38840" target="38796" cy:directed="1"/>
      <edge id="42546" label="1111001010 (1) 1111000010" source="38839" target="38974" cy:directed="1"/>
      <edge id="42545" label="1111001010 (1) 1111101010" source="38839" target="38463" cy:directed="1"/>
      <edge id="42544" label="1111001010 (1) 1110001010" source="38839" target="38875" cy:directed="1"/>
      <edge id="42543" label="1111001010 (1) 1101001010" source="38839" target="38864" cy:directed="1"/>
      <edge id="42542" label="1111101000 (1) 1111100000" source="38838" target="38973" cy:directed="1"/>
      <edge id="42541" label="1111101000 (1) 1111111000" source="38838" target="38807" cy:directed="1"/>
      <edge id="42540" label="1111101000 (1) 1110101000" source="38838" target="38805" cy:directed="1"/>
      <edge id="42539" label="1111101000 (1) 1101101000" source="38838" target="38863" cy:directed="1"/>
      <edge id="42538" label="0001111000 (1) 0001111100" source="38837" target="38642" cy:directed="1"/>
      <edge id="42537" label="0001111000 (1) 0001011000" source="38837" target="38910" cy:directed="1"/>
      <edge id="42536" label="0001111000 (1) 0011111000" source="38837" target="38811" cy:directed="1"/>
      <edge id="42535" label="0100000100 (1) 0100000110" source="38836" target="38835" cy:directed="1"/>
      <edge id="42534" label="0100000100 (1) 0100000000" source="38836" target="38996" cy:directed="1"/>
      <edge id="42533" label="0100000100 (1) 0100100100" source="38836" target="38834" cy:directed="1"/>
      <edge id="42532" label="0100000100 (1) 0101000100" source="38836" target="38833" cy:directed="1"/>
      <edge id="42531" label="0100000100 (1) 0000000100" source="38836" target="38850" cy:directed="1"/>
      <edge id="42530" label="0100000110 (1) 0100000010" source="38835" target="38995" cy:directed="1"/>
      <edge id="42529" label="0100000110 (1) 0100100110" source="38835" target="38461" cy:directed="1"/>
      <edge id="42528" label="0100000110 (1) 0101000110" source="38835" target="38795" cy:directed="1"/>
      <edge id="42527" label="0100000110 (1) 0000000110" source="38835" target="38849" cy:directed="1"/>
      <edge id="42526" label="0100100100 (1) 0100100000" source="38834" target="38959" cy:directed="1"/>
      <edge id="42525" label="0100100100 (1) 0100110100" source="38834" target="38762" cy:directed="1"/>
      <edge id="42524" label="0100100100 (1) 0101100100" source="38834" target="38794" cy:directed="1"/>
      <edge id="42523" label="0100100100 (1) 0000100100" source="38834" target="38848" cy:directed="1"/>
      <edge id="42522" label="0101000100 (1) 0101000110" source="38833" target="38795" cy:directed="1"/>
      <edge id="42521" label="0101000100 (1) 0101000000" source="38833" target="38994" cy:directed="1"/>
      <edge id="42520" label="0101000100 (1) 0101100100" source="38833" target="38794" cy:directed="1"/>
      <edge id="42519" label="0101000100 (1) 0001000100" source="38833" target="38847" cy:directed="1"/>
      <edge id="42518" label="0111001000 (1) 0111001010" source="38832" target="38831" cy:directed="1"/>
      <edge id="42517" label="0111001000 (1) 0111000000" source="38832" target="38972" cy:directed="1"/>
      <edge id="42516" label="0111001000 (1) 0111101000" source="38832" target="38830" cy:directed="1"/>
      <edge id="42515" label="0111001000 (1) 0110001000" source="38832" target="38873" cy:directed="1"/>
      <edge id="42514" label="0111001000 (1) 0101001000" source="38832" target="38894" cy:directed="1"/>
      <edge id="42513" label="0111001000 (1) 0011001000" source="38832" target="38845" cy:directed="1"/>
      <edge id="42512" label="0111001010 (1) 0111000010" source="38831" target="38971" cy:directed="1"/>
      <edge id="42511" label="0111001010 (1) 0111101010" source="38831" target="38460" cy:directed="1"/>
      <edge id="42510" label="0111001010 (1) 0110001010" source="38831" target="38872" cy:directed="1"/>
      <edge id="42509" label="0111001010 (1) 0101001010" source="38831" target="38861" cy:directed="1"/>
      <edge id="42508" label="0111001010 (1) 0011001010" source="38831" target="38844" cy:directed="1"/>
      <edge id="42507" label="0111101000 (1) 0111100000" source="38830" target="38970" cy:directed="1"/>
      <edge id="42506" label="0111101000 (1) 0111111000" source="38830" target="38806" cy:directed="1"/>
      <edge id="42505" label="0111101000 (1) 0110101000" source="38830" target="38804" cy:directed="1"/>
      <edge id="42504" label="0111101000 (1) 0101101000" source="38830" target="38860" cy:directed="1"/>
      <edge id="42503" label="0111101000 (1) 0011101000" source="38830" target="38789" cy:directed="1"/>
      <edge id="42502" label="1101111000 (1) 1101111100" source="38829" target="38633" cy:directed="1"/>
      <edge id="42501" label="1101111000 (1) 1001111000" source="38829" target="38843" cy:directed="1"/>
      <edge id="42500" label="0101111000 (1) 0101111100" source="38828" target="38632" cy:directed="1"/>
      <edge id="42499" label="0101111000 (1) 0001111000" source="38828" target="38837" cy:directed="1"/>
      <edge id="42498" label="0000101000 (1) 0000100000" source="38827" target="38964" cy:directed="1"/>
      <edge id="42497" label="0000101000 (1) 0000111000" source="38827" target="38874" cy:directed="1"/>
      <edge id="42496" label="0000101000 (1) 0000001000" source="38827" target="38901" cy:directed="1"/>
      <edge id="42495" label="0000101000 (1) 0001101000" source="38827" target="38826" cy:directed="1"/>
      <edge id="42494" label="0000101000 (1) 0010101000" source="38827" target="38825" cy:directed="1"/>
      <edge id="42493" label="0001101000 (1) 0001100000" source="38826" target="38962" cy:directed="1"/>
      <edge id="42492" label="0001101000 (1) 0001111000" source="38826" target="38837" cy:directed="1"/>
      <edge id="42491" label="0001101000 (1) 0001001000" source="38826" target="38899" cy:directed="1"/>
      <edge id="42490" label="0001101000 (1) 0011101000" source="38826" target="38789" cy:directed="1"/>
      <edge id="42489" label="0010101000 (1) 0010100000" source="38825" target="38961" cy:directed="1"/>
      <edge id="42488" label="0010101000 (1) 0010111000" source="38825" target="38866" cy:directed="1"/>
      <edge id="42487" label="0010101000 (1) 0010001000" source="38825" target="38878" cy:directed="1"/>
      <edge id="42486" label="1000101000 (1) 1000100000" source="38824" target="38969" cy:directed="1"/>
      <edge id="42485" label="1000101000 (1) 1000111000" source="38824" target="38876" cy:directed="1"/>
      <edge id="42484" label="1000101000 (1) 1000001000" source="38824" target="38905" cy:directed="1"/>
      <edge id="42483" label="1000101000 (1) 1001101000" source="38824" target="38823" cy:directed="1"/>
      <edge id="42482" label="1000101000 (1) 1010101000" source="38824" target="38822" cy:directed="1"/>
      <edge id="42481" label="1000101000 (1) 1100101000" source="38824" target="38821" cy:directed="1"/>
      <edge id="42480" label="1001101000 (1) 1001100000" source="38823" target="38967" cy:directed="1"/>
      <edge id="42479" label="1001101000 (1) 1001111000" source="38823" target="38843" cy:directed="1"/>
      <edge id="42478" label="1001101000 (1) 1001001000" source="38823" target="38903" cy:directed="1"/>
      <edge id="42477" label="1001101000 (1) 1011101000" source="38823" target="38788" cy:directed="1"/>
      <edge id="42476" label="1001101000 (1) 1101101000" source="38823" target="38863" cy:directed="1"/>
      <edge id="42475" label="1010101000 (1) 1010100000" source="38822" target="38966" cy:directed="1"/>
      <edge id="42474" label="1010101000 (1) 1010111000" source="38822" target="38869" cy:directed="1"/>
      <edge id="42473" label="1010101000 (1) 1010001000" source="38822" target="38881" cy:directed="1"/>
      <edge id="42472" label="1010101000 (1) 1110101000" source="38822" target="38805" cy:directed="1"/>
      <edge id="42471" label="1100101000 (1) 1100100000" source="38821" target="38965" cy:directed="1"/>
      <edge id="42470" label="1100101000 (1) 1100111000" source="38821" target="38871" cy:directed="1"/>
      <edge id="42469" label="1100101000 (1) 1100001000" source="38821" target="38902" cy:directed="1"/>
      <edge id="42468" label="1100101000 (1) 1101101000" source="38821" target="38863" cy:directed="1"/>
      <edge id="42467" label="1010000110 (1) 1010000010" source="38820" target="38992" cy:directed="1"/>
      <edge id="42466" label="1010000110 (1) 1010100110" source="38820" target="38436" cy:directed="1"/>
      <edge id="42465" label="1010000110 (1) 1110000110" source="38820" target="38813" cy:directed="1"/>
      <edge id="42464" label="1010100100 (1) 1010100000" source="38819" target="38966" cy:directed="1"/>
      <edge id="42463" label="1010100100 (1) 1010110100" source="38819" target="38761" cy:directed="1"/>
      <edge id="42462" label="1010100100 (1) 1110100100" source="38819" target="38812" cy:directed="1"/>
      <edge id="42461" label="1110000100 (1) 1110000110" source="38818" target="38813" cy:directed="1"/>
      <edge id="42460" label="1110000100 (1) 1110000000" source="38818" target="38991" cy:directed="1"/>
      <edge id="42459" label="1110000100 (1) 1110100100" source="38818" target="38812" cy:directed="1"/>
      <edge id="42458" label="1110000100 (1) 1100000100" source="38818" target="38854" cy:directed="1"/>
      <edge id="42457" label="0010000110 (1) 0010000010" source="38817" target="38989" cy:directed="1"/>
      <edge id="42456" label="0010000110 (1) 0010100110" source="38817" target="38434" cy:directed="1"/>
      <edge id="42455" label="0010100100 (1) 0010100000" source="38816" target="38961" cy:directed="1"/>
      <edge id="42454" label="0010100100 (1) 0010110100" source="38816" target="38760" cy:directed="1"/>
      <edge id="42453" label="0100101000 (1) 0100100000" source="38815" target="38959" cy:directed="1"/>
      <edge id="42452" label="0100101000 (1) 0100111000" source="38815" target="38870" cy:directed="1"/>
      <edge id="42451" label="0100101000 (1) 0100001000" source="38815" target="38896" cy:directed="1"/>
      <edge id="42450" label="0100101000 (1) 0101101000" source="38815" target="38860" cy:directed="1"/>
      <edge id="42449" label="0100101000 (1) 0000101000" source="38815" target="38827" cy:directed="1"/>
      <edge id="42448" label="1011111000 (1) 1011111100" source="38814" target="38616" cy:directed="1"/>
      <edge id="42447" label="1011111000 (1) 1011011000" source="38814" target="38891" cy:directed="1"/>
      <edge id="42446" label="1011111000 (1) 1010111000" source="38814" target="38869" cy:directed="1"/>
      <edge id="42445" label="1110000110 (1) 1110000010" source="38813" target="38988" cy:directed="1"/>
      <edge id="42444" label="1110000110 (1) 1110100110" source="38813" target="38422" cy:directed="1"/>
      <edge id="42443" label="1110000110 (1) 1100000110" source="38813" target="38842" cy:directed="1"/>
      <edge id="42442" label="1110100100 (1) 1110100000" source="38812" target="38956" cy:directed="1"/>
      <edge id="42441" label="1110100100 (1) 1110110100" source="38812" target="38757" cy:directed="1"/>
      <edge id="42440" label="1110100100 (1) 1100100100" source="38812" target="38841" cy:directed="1"/>
      <edge id="42439" label="0011111000 (1) 0011111100" source="38811" target="38618" cy:directed="1"/>
      <edge id="42438" label="0011111000 (1) 0011011000" source="38811" target="38888" cy:directed="1"/>
      <edge id="42437" label="0011111000 (1) 0010111000" source="38811" target="38866" cy:directed="1"/>
      <edge id="42436" label="0110000100 (1) 0110000110" source="38810" target="38809" cy:directed="1"/>
      <edge id="42435" label="0110000100 (1) 0110000000" source="38810" target="38987" cy:directed="1"/>
      <edge id="42434" label="0110000100 (1) 0110100100" source="38810" target="38808" cy:directed="1"/>
      <edge id="42433" label="0110000100 (1) 0100000100" source="38810" target="38836" cy:directed="1"/>
      <edge id="42432" label="0110000100 (1) 0010000100" source="38810" target="38846" cy:directed="1"/>
      <edge id="42431" label="0110000110 (1) 0110000010" source="38809" target="38986" cy:directed="1"/>
      <edge id="42430" label="0110000110 (1) 0110100110" source="38809" target="38421" cy:directed="1"/>
      <edge id="42429" label="0110000110 (1) 0100000110" source="38809" target="38835" cy:directed="1"/>
      <edge id="42428" label="0110000110 (1) 0010000110" source="38809" target="38817" cy:directed="1"/>
      <edge id="42427" label="0110100100 (1) 0110100000" source="38808" target="38953" cy:directed="1"/>
      <edge id="42426" label="0110100100 (1) 0110110100" source="38808" target="38754" cy:directed="1"/>
      <edge id="42425" label="0110100100 (1) 0100100100" source="38808" target="38834" cy:directed="1"/>
      <edge id="42424" label="0110100100 (1) 0010100100" source="38808" target="38816" cy:directed="1"/>
      <edge id="42423" label="1111111000 (1) 1111111100" source="38807" target="38607" cy:directed="1"/>
      <edge id="42422" label="1111111000 (1) 1110111000" source="38807" target="38865" cy:directed="1"/>
      <edge id="42421" label="1111111000 (1) 1101111000" source="38807" target="38829" cy:directed="1"/>
      <edge id="42420" label="1111111000 (1) 1011111000" source="38807" target="38814" cy:directed="1"/>
      <edge id="42419" label="0111111000 (1) 0111111100" source="38806" target="38606" cy:directed="1"/>
      <edge id="42418" label="0111111000 (1) 0110111000" source="38806" target="38862" cy:directed="1"/>
      <edge id="42417" label="0111111000 (1) 0101111000" source="38806" target="38828" cy:directed="1"/>
      <edge id="42416" label="0111111000 (1) 0011111000" source="38806" target="38811" cy:directed="1"/>
      <edge id="42415" label="1110101000 (1) 1110100000" source="38805" target="38956" cy:directed="1"/>
      <edge id="42414" label="1110101000 (1) 1110111000" source="38805" target="38865" cy:directed="1"/>
      <edge id="42413" label="1110101000 (1) 1110001000" source="38805" target="38879" cy:directed="1"/>
      <edge id="42412" label="1110101000 (1) 1100101000" source="38805" target="38821" cy:directed="1"/>
      <edge id="42411" label="0110101000 (1) 0110100000" source="38804" target="38953" cy:directed="1"/>
      <edge id="42410" label="0110101000 (1) 0110111000" source="38804" target="38862" cy:directed="1"/>
      <edge id="42409" label="0110101000 (1) 0110001000" source="38804" target="38873" cy:directed="1"/>
      <edge id="42408" label="0110101000 (1) 0100101000" source="38804" target="38815" cy:directed="1"/>
      <edge id="42407" label="0110101000 (1) 0010101000" source="38804" target="38825" cy:directed="1"/>
      <edge id="42406" label="1001000110 (1) 1001000010" source="38803" target="38984" cy:directed="1"/>
      <edge id="42405" label="1001000110 (1) 1001100110" source="38803" target="38380" cy:directed="1"/>
      <edge id="42404" label="1001000110 (1) 1011000110" source="38803" target="38787" cy:directed="1"/>
      <edge id="42403" label="1001000110 (1) 1101000110" source="38803" target="38797" cy:directed="1"/>
      <edge id="42402" label="1001100100 (1) 1001100000" source="38802" target="38967" cy:directed="1"/>
      <edge id="42401" label="1001100100 (1) 1001110100" source="38802" target="38748" cy:directed="1"/>
      <edge id="42400" label="1001100100 (1) 1011100100" source="38802" target="38786" cy:directed="1"/>
      <edge id="42399" label="1001100100 (1) 1101100100" source="38802" target="38796" cy:directed="1"/>
      <edge id="42398" label="1011000100 (1) 1011000110" source="38801" target="38787" cy:directed="1"/>
      <edge id="42397" label="1011000100 (1) 1011000000" source="38801" target="38979" cy:directed="1"/>
      <edge id="42396" label="1011000100 (1) 1011100100" source="38801" target="38786" cy:directed="1"/>
      <edge id="42395" label="1011000100 (1) 1010000100" source="38801" target="38855" cy:directed="1"/>
      <edge id="42394" label="1011000100 (1) 1111000100" source="38801" target="38785" cy:directed="1"/>
      <edge id="42393" label="0001000110 (1) 0001000010" source="38800" target="38985" cy:directed="1"/>
      <edge id="42392" label="0001000110 (1) 0001100110" source="38800" target="38379" cy:directed="1"/>
      <edge id="42391" label="0001000110 (1) 0011000110" source="38800" target="38782" cy:directed="1"/>
      <edge id="42390" label="0001100100 (1) 0001100000" source="38799" target="38962" cy:directed="1"/>
      <edge id="42389" label="0001100100 (1) 0001110100" source="38799" target="38744" cy:directed="1"/>
      <edge id="42388" label="0001100100 (1) 0011100100" source="38799" target="38781" cy:directed="1"/>
      <edge id="42387" label="0011000100 (1) 0011000110" source="38798" target="38782" cy:directed="1"/>
      <edge id="42386" label="0011000100 (1) 0011000000" source="38798" target="38976" cy:directed="1"/>
      <edge id="42385" label="0011000100 (1) 0011100100" source="38798" target="38781" cy:directed="1"/>
      <edge id="42384" label="0011000100 (1) 0010000100" source="38798" target="38846" cy:directed="1"/>
      <edge id="42383" label="1101000110 (1) 1101000010" source="38797" target="38983" cy:directed="1"/>
      <edge id="42382" label="1101000110 (1) 1101100110" source="38797" target="38368" cy:directed="1"/>
      <edge id="42381" label="1101100100 (1) 1101100000" source="38796" target="38982" cy:directed="1"/>
      <edge id="42380" label="1101100100 (1) 1101110100" source="38796" target="38733" cy:directed="1"/>
      <edge id="42379" label="0101000110 (1) 0101000010" source="38795" target="38981" cy:directed="1"/>
      <edge id="42378" label="0101000110 (1) 0101100110" source="38795" target="38366" cy:directed="1"/>
      <edge id="42377" label="0101000110 (1) 0001000110" source="38795" target="38800" cy:directed="1"/>
      <edge id="42376" label="0101100100 (1) 0101100000" source="38794" target="38980" cy:directed="1"/>
      <edge id="42375" label="0101100100 (1) 0101110100" source="38794" target="38732" cy:directed="1"/>
      <edge id="42374" label="0101100100 (1) 0001100100" source="38794" target="38799" cy:directed="1"/>
      <edge id="42373" label="1000011010 (1) 1000011110" source="38793" target="38498" cy:directed="1"/>
      <edge id="42372" label="1000011010 (1) 1000010010" source="38793" target="38948" cy:directed="1"/>
      <edge id="42371" label="1000011010 (1) 1000001010" source="38793" target="38904" cy:directed="1"/>
      <edge id="42370" label="1000011010 (1) 1001011010" source="38793" target="38759" cy:directed="1"/>
      <edge id="42369" label="1000011100 (1) 1000011110" source="38792" target="38498" cy:directed="1"/>
      <edge id="42368" label="1000011100 (1) 1000001100" source="38792" target="38663" cy:directed="1"/>
      <edge id="42367" label="1000011100 (1) 1001011100" source="38792" target="38758" cy:directed="1"/>
      <edge id="42366" label="1000011100 (1) 1010011100" source="38792" target="38771" cy:directed="1"/>
      <edge id="42365" label="0000011010 (1) 0000011110" source="38791" target="38497" cy:directed="1"/>
      <edge id="42364" label="0000011010 (1) 0000010010" source="38791" target="38942" cy:directed="1"/>
      <edge id="42363" label="0000011010 (1) 0000001010" source="38791" target="38900" cy:directed="1"/>
      <edge id="42362" label="0000011010 (1) 0001011010" source="38791" target="38756" cy:directed="1"/>
      <edge id="42361" label="0000011100 (1) 0000011110" source="38790" target="38497" cy:directed="1"/>
      <edge id="42360" label="0000011100 (1) 0000001100" source="38790" target="38658" cy:directed="1"/>
      <edge id="42359" label="0000011100 (1) 0001011100" source="38790" target="38755" cy:directed="1"/>
      <edge id="42358" label="0000011100 (1) 0010011100" source="38790" target="38769" cy:directed="1"/>
      <edge id="42357" label="0011101000 (1) 0011100000" source="38789" target="38944" cy:directed="1"/>
      <edge id="42356" label="0011101000 (1) 0011111000" source="38789" target="38811" cy:directed="1"/>
      <edge id="42355" label="0011101000 (1) 0011001000" source="38789" target="38845" cy:directed="1"/>
      <edge id="42354" label="0011101000 (1) 0010101000" source="38789" target="38825" cy:directed="1"/>
      <edge id="42353" label="1011101000 (1) 1011100000" source="38788" target="38950" cy:directed="1"/>
      <edge id="42352" label="1011101000 (1) 1011111000" source="38788" target="38814" cy:directed="1"/>
      <edge id="42351" label="1011101000 (1) 1011001000" source="38788" target="38853" cy:directed="1"/>
      <edge id="42350" label="1011101000 (1) 1010101000" source="38788" target="38822" cy:directed="1"/>
      <edge id="42349" label="1011101000 (1) 1111101000" source="38788" target="38838" cy:directed="1"/>
      <edge id="42348" label="1011000110 (1) 1011000010" source="38787" target="38978" cy:directed="1"/>
      <edge id="42347" label="1011000110 (1) 1011100110" source="38787" target="38350" cy:directed="1"/>
      <edge id="42346" label="1011000110 (1) 1010000110" source="38787" target="38820" cy:directed="1"/>
      <edge id="42345" label="1011000110 (1) 1111000110" source="38787" target="38778" cy:directed="1"/>
      <edge id="42344" label="1011100100 (1) 1011100000" source="38786" target="38950" cy:directed="1"/>
      <edge id="42343" label="1011100100 (1) 1011110100" source="38786" target="38717" cy:directed="1"/>
      <edge id="42342" label="1011100100 (1) 1010100100" source="38786" target="38819" cy:directed="1"/>
      <edge id="42341" label="1011100100 (1) 1111100100" source="38786" target="38777" cy:directed="1"/>
      <edge id="42340" label="1111000100 (1) 1111000110" source="38785" target="38778" cy:directed="1"/>
      <edge id="42339" label="1111000100 (1) 1111000000" source="38785" target="38977" cy:directed="1"/>
      <edge id="42338" label="1111000100 (1) 1111100100" source="38785" target="38777" cy:directed="1"/>
      <edge id="42337" label="1111000100 (1) 1110000100" source="38785" target="38818" cy:directed="1"/>
      <edge id="42336" label="1111000100 (1) 1101000100" source="38785" target="38840" cy:directed="1"/>
      <edge id="42335" label="1100011010 (1) 1100011110" source="38784" target="38481" cy:directed="1"/>
      <edge id="42334" label="1100011010 (1) 1100010010" source="38784" target="38937" cy:directed="1"/>
      <edge id="42333" label="1100011010 (1) 1100001010" source="38784" target="38898" cy:directed="1"/>
      <edge id="42332" label="1100011010 (1) 1101011010" source="38784" target="38753" cy:directed="1"/>
      <edge id="42331" label="1100011010 (1) 1000011010" source="38784" target="38793" cy:directed="1"/>
      <edge id="42330" label="1100011100 (1) 1100011110" source="38783" target="38481" cy:directed="1"/>
      <edge id="42329" label="1100011100 (1) 1100001100" source="38783" target="38659" cy:directed="1"/>
      <edge id="42328" label="1100011100 (1) 1101011100" source="38783" target="38752" cy:directed="1"/>
      <edge id="42327" label="1100011100 (1) 1000011100" source="38783" target="38792" cy:directed="1"/>
      <edge id="42326" label="0011000110 (1) 0011000010" source="38782" target="38975" cy:directed="1"/>
      <edge id="42325" label="0011000110 (1) 0011100110" source="38782" target="38349" cy:directed="1"/>
      <edge id="42324" label="0011000110 (1) 0010000110" source="38782" target="38817" cy:directed="1"/>
      <edge id="42323" label="0011100100 (1) 0011100000" source="38781" target="38944" cy:directed="1"/>
      <edge id="42322" label="0011100100 (1) 0011110100" source="38781" target="38716" cy:directed="1"/>
      <edge id="42321" label="0011100100 (1) 0010100100" source="38781" target="38816" cy:directed="1"/>
      <edge id="42320" label="0100011010 (1) 0100011110" source="38780" target="38480" cy:directed="1"/>
      <edge id="42319" label="0100011010 (1) 0100010010" source="38780" target="38932" cy:directed="1"/>
      <edge id="42318" label="0100011010 (1) 0100001010" source="38780" target="38895" cy:directed="1"/>
      <edge id="42317" label="0100011010 (1) 0101011010" source="38780" target="38751" cy:directed="1"/>
      <edge id="42316" label="0100011010 (1) 0000011010" source="38780" target="38791" cy:directed="1"/>
      <edge id="42315" label="0100011100 (1) 0100011110" source="38779" target="38480" cy:directed="1"/>
      <edge id="42314" label="0100011100 (1) 0100001100" source="38779" target="38641" cy:directed="1"/>
      <edge id="42313" label="0100011100 (1) 0101011100" source="38779" target="38750" cy:directed="1"/>
      <edge id="42312" label="0100011100 (1) 0000011100" source="38779" target="38790" cy:directed="1"/>
      <edge id="42311" label="1111000110 (1) 1111000010" source="38778" target="38974" cy:directed="1"/>
      <edge id="42310" label="1111000110 (1) 1111100110" source="38778" target="38343" cy:directed="1"/>
      <edge id="42309" label="1111000110 (1) 1110000110" source="38778" target="38813" cy:directed="1"/>
      <edge id="42308" label="1111000110 (1) 1101000110" source="38778" target="38797" cy:directed="1"/>
      <edge id="42307" label="1111100100 (1) 1111100000" source="38777" target="38973" cy:directed="1"/>
      <edge id="42306" label="1111100100 (1) 1111110100" source="38777" target="38711" cy:directed="1"/>
      <edge id="42305" label="1111100100 (1) 1110100100" source="38777" target="38812" cy:directed="1"/>
      <edge id="42304" label="1111100100 (1) 1101100100" source="38777" target="38796" cy:directed="1"/>
      <edge id="42303" label="0111000100 (1) 0111000110" source="38776" target="38775" cy:directed="1"/>
      <edge id="42302" label="0111000100 (1) 0111000000" source="38776" target="38972" cy:directed="1"/>
      <edge id="42301" label="0111000100 (1) 0111100100" source="38776" target="38774" cy:directed="1"/>
      <edge id="42300" label="0111000100 (1) 0110000100" source="38776" target="38810" cy:directed="1"/>
      <edge id="42299" label="0111000100 (1) 0101000100" source="38776" target="38833" cy:directed="1"/>
      <edge id="42298" label="0111000100 (1) 0011000100" source="38776" target="38798" cy:directed="1"/>
      <edge id="42297" label="0111000110 (1) 0111000010" source="38775" target="38971" cy:directed="1"/>
      <edge id="42296" label="0111000110 (1) 0111100110" source="38775" target="38342" cy:directed="1"/>
      <edge id="42295" label="0111000110 (1) 0110000110" source="38775" target="38809" cy:directed="1"/>
      <edge id="42294" label="0111000110 (1) 0101000110" source="38775" target="38795" cy:directed="1"/>
      <edge id="42293" label="0111000110 (1) 0011000110" source="38775" target="38782" cy:directed="1"/>
      <edge id="42292" label="0111100100 (1) 0111100000" source="38774" target="38970" cy:directed="1"/>
      <edge id="42291" label="0111100100 (1) 0111110100" source="38774" target="38710" cy:directed="1"/>
      <edge id="42290" label="0111100100 (1) 0110100100" source="38774" target="38808" cy:directed="1"/>
      <edge id="42289" label="0111100100 (1) 0101100100" source="38774" target="38794" cy:directed="1"/>
      <edge id="42288" label="0111100100 (1) 0011100100" source="38774" target="38781" cy:directed="1"/>
      <edge id="42287" label="1000110100 (1) 1000110000" source="38773" target="38968" cy:directed="1"/>
      <edge id="42286" label="1000110100 (1) 1000111100" source="38773" target="38721" cy:directed="1"/>
      <edge id="42285" label="1000110100 (1) 1001110100" source="38773" target="38748" cy:directed="1"/>
      <edge id="42284" label="1000110100 (1) 1010110100" source="38773" target="38761" cy:directed="1"/>
      <edge id="42283" label="1010011010 (1) 1010011110" source="38772" target="38465" cy:directed="1"/>
      <edge id="42282" label="1010011010 (1) 1010010010" source="38772" target="38927" cy:directed="1"/>
      <edge id="42281" label="1010011010 (1) 1010001010" source="38772" target="38880" cy:directed="1"/>
      <edge id="42280" label="1010011010 (1) 1000011010" source="38772" target="38793" cy:directed="1"/>
      <edge id="42279" label="1010011100 (1) 1010011110" source="38771" target="38465" cy:directed="1"/>
      <edge id="42278" label="1010011100 (1) 1010001100" source="38771" target="38660" cy:directed="1"/>
      <edge id="42277" label="0010011010 (1) 0010011110" source="38770" target="38462" cy:directed="1"/>
      <edge id="42276" label="0010011010 (1) 0010010010" source="38770" target="38923" cy:directed="1"/>
      <edge id="42275" label="0010011010 (1) 0010001010" source="38770" target="38877" cy:directed="1"/>
      <edge id="42274" label="0010011010 (1) 0000011010" source="38770" target="38791" cy:directed="1"/>
      <edge id="42273" label="0010011100 (1) 0010011110" source="38769" target="38462" cy:directed="1"/>
      <edge id="42272" label="0010011100 (1) 0010001100" source="38769" target="38655" cy:directed="1"/>
      <edge id="42271" label="0000110100 (1) 0000110000" source="38768" target="38963" cy:directed="1"/>
      <edge id="42270" label="0000110100 (1) 0000111100" source="38768" target="38720" cy:directed="1"/>
      <edge id="42269" label="0000110100 (1) 0001110100" source="38768" target="38744" cy:directed="1"/>
      <edge id="42268" label="0000110100 (1) 0010110100" source="38768" target="38760" cy:directed="1"/>
      <edge id="42267" label="1110011010 (1) 1110011110" source="38767" target="38459" cy:directed="1"/>
      <edge id="42266" label="1110011010 (1) 1110010010" source="38767" target="38919" cy:directed="1"/>
      <edge id="42265" label="1110011010 (1) 1110001010" source="38767" target="38875" cy:directed="1"/>
      <edge id="42264" label="1110011010 (1) 1100011010" source="38767" target="38784" cy:directed="1"/>
      <edge id="42263" label="1110011010 (1) 1010011010" source="38767" target="38772" cy:directed="1"/>
      <edge id="42262" label="1110011100 (1) 1110011110" source="38766" target="38459" cy:directed="1"/>
      <edge id="42261" label="1110011100 (1) 1110001100" source="38766" target="38622" cy:directed="1"/>
      <edge id="42260" label="1110011100 (1) 1100011100" source="38766" target="38783" cy:directed="1"/>
      <edge id="42259" label="1110011100 (1) 1010011100" source="38766" target="38771" cy:directed="1"/>
      <edge id="42258" label="1100110100 (1) 1100110000" source="38765" target="38960" cy:directed="1"/>
      <edge id="42257" label="1100110100 (1) 1100111100" source="38765" target="38718" cy:directed="1"/>
      <edge id="42256" label="1100110100 (1) 1101110100" source="38765" target="38733" cy:directed="1"/>
      <edge id="42255" label="1100110100 (1) 1000110100" source="38765" target="38773" cy:directed="1"/>
      <edge id="42254" label="0110011010 (1) 0110011110" source="38764" target="38458" cy:directed="1"/>
      <edge id="42253" label="0110011010 (1) 0110010010" source="38764" target="38915" cy:directed="1"/>
      <edge id="42252" label="0110011010 (1) 0110001010" source="38764" target="38872" cy:directed="1"/>
      <edge id="42251" label="0110011010 (1) 0100011010" source="38764" target="38780" cy:directed="1"/>
      <edge id="42250" label="0110011010 (1) 0010011010" source="38764" target="38770" cy:directed="1"/>
      <edge id="42249" label="0110011100 (1) 0110011110" source="38763" target="38458" cy:directed="1"/>
      <edge id="42248" label="0110011100 (1) 0110001100" source="38763" target="38611" cy:directed="1"/>
      <edge id="42247" label="0110011100 (1) 0100011100" source="38763" target="38779" cy:directed="1"/>
      <edge id="42246" label="0110011100 (1) 0010011100" source="38763" target="38769" cy:directed="1"/>
      <edge id="42245" label="0100110100 (1) 0100110000" source="38762" target="38958" cy:directed="1"/>
      <edge id="42244" label="0100110100 (1) 0100111100" source="38762" target="38714" cy:directed="1"/>
      <edge id="42243" label="0100110100 (1) 0101110100" source="38762" target="38732" cy:directed="1"/>
      <edge id="42242" label="0100110100 (1) 0000110100" source="38762" target="38768" cy:directed="1"/>
      <edge id="42241" label="1010110100 (1) 1010110000" source="38761" target="38957" cy:directed="1"/>
      <edge id="42240" label="1010110100 (1) 1010111100" source="38761" target="38696" cy:directed="1"/>
      <edge id="42239" label="0010110100 (1) 0010110000" source="38760" target="38955" cy:directed="1"/>
      <edge id="42238" label="0010110100 (1) 0010111100" source="38760" target="38694" cy:directed="1"/>
      <edge id="42237" label="1001011010 (1) 1001011110" source="38759" target="38413" cy:directed="1"/>
      <edge id="42236" label="1001011010 (1) 1001010010" source="38759" target="38913" cy:directed="1"/>
      <edge id="42235" label="1001011010 (1) 1001001010" source="38759" target="38868" cy:directed="1"/>
      <edge id="42234" label="1001011100 (1) 1001011110" source="38758" target="38413" cy:directed="1"/>
      <edge id="42233" label="1001011100 (1) 1001001100" source="38758" target="38661" cy:directed="1"/>
      <edge id="42232" label="1001011100 (1) 1011011100" source="38758" target="38746" cy:directed="1"/>
      <edge id="42231" label="1110110100 (1) 1110110000" source="38757" target="38954" cy:directed="1"/>
      <edge id="42230" label="1110110100 (1) 1110111100" source="38757" target="38682" cy:directed="1"/>
      <edge id="42229" label="1110110100 (1) 1100110100" source="38757" target="38765" cy:directed="1"/>
      <edge id="42228" label="1110110100 (1) 1010110100" source="38757" target="38761" cy:directed="1"/>
      <edge id="42227" label="0001011010 (1) 0001011110" source="38756" target="38412" cy:directed="1"/>
      <edge id="42226" label="0001011010 (1) 0001010010" source="38756" target="38911" cy:directed="1"/>
      <edge id="42225" label="0001011010 (1) 0001001010" source="38756" target="38867" cy:directed="1"/>
      <edge id="42224" label="0001011100 (1) 0001011110" source="38755" target="38412" cy:directed="1"/>
      <edge id="42223" label="0001011100 (1) 0001001100" source="38755" target="38656" cy:directed="1"/>
      <edge id="42222" label="0001011100 (1) 0011011100" source="38755" target="38742" cy:directed="1"/>
      <edge id="42221" label="0110110100 (1) 0110110000" source="38754" target="38952" cy:directed="1"/>
      <edge id="42220" label="0110110100 (1) 0110111100" source="38754" target="38681" cy:directed="1"/>
      <edge id="42219" label="0110110100 (1) 0100110100" source="38754" target="38762" cy:directed="1"/>
      <edge id="42218" label="0110110100 (1) 0010110100" source="38754" target="38760" cy:directed="1"/>
      <edge id="42217" label="1101011010 (1) 1101011110" source="38753" target="38403" cy:directed="1"/>
      <edge id="42216" label="1101011010 (1) 1101010010" source="38753" target="38909" cy:directed="1"/>
      <edge id="42215" label="1101011010 (1) 1101001010" source="38753" target="38864" cy:directed="1"/>
      <edge id="42214" label="1101011010 (1) 1101111010" source="38753" target="38355" cy:directed="1"/>
      <edge id="42213" label="1101011010 (1) 1001011010" source="38753" target="38759" cy:directed="1"/>
      <edge id="42212" label="1101011100 (1) 1101011110" source="38752" target="38403" cy:directed="1"/>
      <edge id="42211" label="1101011100 (1) 1101001100" source="38752" target="38643" cy:directed="1"/>
      <edge id="42210" label="1101011100 (1) 1101111100" source="38752" target="38633" cy:directed="1"/>
      <edge id="42209" label="1101011100 (1) 1001011100" source="38752" target="38758" cy:directed="1"/>
      <edge id="42208" label="0101011010 (1) 0101011110" source="38751" target="38401" cy:directed="1"/>
      <edge id="42207" label="0101011010 (1) 0101010010" source="38751" target="38907" cy:directed="1"/>
      <edge id="42206" label="0101011010 (1) 0101001010" source="38751" target="38861" cy:directed="1"/>
      <edge id="42205" label="0101011010 (1) 0101111010" source="38751" target="38346" cy:directed="1"/>
      <edge id="42204" label="0101011010 (1) 0001011010" source="38751" target="38756" cy:directed="1"/>
      <edge id="42203" label="0101011100 (1) 0101011110" source="38750" target="38401" cy:directed="1"/>
      <edge id="42202" label="0101011100 (1) 0101001100" source="38750" target="38639" cy:directed="1"/>
      <edge id="42201" label="0101011100 (1) 0101111100" source="38750" target="38632" cy:directed="1"/>
      <edge id="42200" label="0101011100 (1) 0001011100" source="38750" target="38755" cy:directed="1"/>
      <edge id="42199" label="1101100010 (1) 1101100000" source="38749" target="38982" cy:directed="1"/>
      <edge id="42198" label="1101100010 (1) 1101110010" source="38749" target="38617" cy:directed="1"/>
      <edge id="42197" label="1001110100 (1) 1001110000" source="38748" target="38951" cy:directed="1"/>
      <edge id="42196" label="1001110100 (1) 1001111100" source="38748" target="38645" cy:directed="1"/>
      <edge id="42195" label="1001110100 (1) 1011110100" source="38748" target="38717" cy:directed="1"/>
      <edge id="42194" label="1011011010 (1) 1011011110" source="38747" target="38369" cy:directed="1"/>
      <edge id="42193" label="1011011010 (1) 1011010010" source="38747" target="38892" cy:directed="1"/>
      <edge id="42192" label="1011011010 (1) 1011001010" source="38747" target="38852" cy:directed="1"/>
      <edge id="42191" label="1011011010 (1) 1010011010" source="38747" target="38772" cy:directed="1"/>
      <edge id="42190" label="1011011010 (1) 1001011010" source="38747" target="38759" cy:directed="1"/>
      <edge id="42189" label="1011011100 (1) 1011011110" source="38746" target="38369" cy:directed="1"/>
      <edge id="42188" label="1011011100 (1) 1011001100" source="38746" target="38595" cy:directed="1"/>
      <edge id="42187" label="1011011100 (1) 1010011100" source="38746" target="38771" cy:directed="1"/>
      <edge id="42186" label="0101100010 (1) 0101100000" source="38745" target="38980" cy:directed="1"/>
      <edge id="42185" label="0101100010 (1) 0101110010" source="38745" target="38608" cy:directed="1"/>
      <edge id="42184" label="0101100010 (1) 0001100010" source="38745" target="38698" cy:directed="1"/>
      <edge id="42183" label="0001110100 (1) 0001110000" source="38744" target="38945" cy:directed="1"/>
      <edge id="42182" label="0001110100 (1) 0001111100" source="38744" target="38642" cy:directed="1"/>
      <edge id="42181" label="0001110100 (1) 0011110100" source="38744" target="38716" cy:directed="1"/>
      <edge id="42180" label="0011011010 (1) 0011011110" source="38743" target="38367" cy:directed="1"/>
      <edge id="42179" label="0011011010 (1) 0011010010" source="38743" target="38889" cy:directed="1"/>
      <edge id="42178" label="0011011010 (1) 0011001010" source="38743" target="38844" cy:directed="1"/>
      <edge id="42177" label="0011011010 (1) 0010011010" source="38743" target="38770" cy:directed="1"/>
      <edge id="42176" label="0011011010 (1) 0001011010" source="38743" target="38756" cy:directed="1"/>
      <edge id="42175" label="0011011100 (1) 0011011110" source="38742" target="38367" cy:directed="1"/>
      <edge id="42174" label="0011011100 (1) 0011001100" source="38742" target="38590" cy:directed="1"/>
      <edge id="42173" label="0011011100 (1) 0010011100" source="38742" target="38769" cy:directed="1"/>
      <edge id="42172" label="0000010100 (1) 0000010110" source="38741" target="38740" cy:directed="1"/>
      <edge id="42171" label="0000010100 (1) 0000010000" source="38741" target="38943" cy:directed="1"/>
      <edge id="42170" label="0000010100 (1) 0000011100" source="38741" target="38790" cy:directed="1"/>
      <edge id="42169" label="0000010100 (1) 0000000100" source="38741" target="38850" cy:directed="1"/>
      <edge id="42168" label="0000010100 (1) 0000110100" source="38741" target="38768" cy:directed="1"/>
      <edge id="42167" label="0000010100 (1) 0001010100" source="38741" target="38739" cy:directed="1"/>
      <edge id="42166" label="0000010100 (1) 0010010100" source="38741" target="38738" cy:directed="1"/>
      <edge id="42165" label="0000010110 (1) 0000010010" source="38740" target="38942" cy:directed="1"/>
      <edge id="42164" label="0000010110 (1) 0000000110" source="38740" target="38849" cy:directed="1"/>
      <edge id="42163" label="0000010110 (1) 0000110110" source="38740" target="38330" cy:directed="1"/>
      <edge id="42162" label="0000010110 (1) 0001010110" source="38740" target="38673" cy:directed="1"/>
      <edge id="42161" label="0000010110 (1) 0010010110" source="38740" target="38713" cy:directed="1"/>
      <edge id="42160" label="0001010100 (1) 0001010110" source="38739" target="38673" cy:directed="1"/>
      <edge id="42159" label="0001010100 (1) 0001010000" source="38739" target="38940" cy:directed="1"/>
      <edge id="42158" label="0001010100 (1) 0001011100" source="38739" target="38755" cy:directed="1"/>
      <edge id="42157" label="0001010100 (1) 0001000100" source="38739" target="38847" cy:directed="1"/>
      <edge id="42156" label="0001010100 (1) 0001110100" source="38739" target="38744" cy:directed="1"/>
      <edge id="42155" label="0001010100 (1) 0011010100" source="38739" target="38672" cy:directed="1"/>
      <edge id="42154" label="0010010100 (1) 0010010110" source="38738" target="38713" cy:directed="1"/>
      <edge id="42153" label="0010010100 (1) 0010010000" source="38738" target="38924" cy:directed="1"/>
      <edge id="42152" label="0010010100 (1) 0010011100" source="38738" target="38769" cy:directed="1"/>
      <edge id="42151" label="0010010100 (1) 0010000100" source="38738" target="38846" cy:directed="1"/>
      <edge id="42150" label="0010010100 (1) 0010110100" source="38738" target="38760" cy:directed="1"/>
      <edge id="42149" label="1000010100 (1) 1000010110" source="38737" target="38736" cy:directed="1"/>
      <edge id="42148" label="1000010100 (1) 1000010000" source="38737" target="38949" cy:directed="1"/>
      <edge id="42147" label="1000010100 (1) 1000011100" source="38737" target="38792" cy:directed="1"/>
      <edge id="42146" label="1000010100 (1) 1000000100" source="38737" target="38859" cy:directed="1"/>
      <edge id="42145" label="1000010100 (1) 1000110100" source="38737" target="38773" cy:directed="1"/>
      <edge id="42144" label="1000010100 (1) 1001010100" source="38737" target="38735" cy:directed="1"/>
      <edge id="42143" label="1000010100 (1) 1010010100" source="38737" target="38734" cy:directed="1"/>
      <edge id="42142" label="1000010110 (1) 1000010010" source="38736" target="38948" cy:directed="1"/>
      <edge id="42141" label="1000010110 (1) 1000000110" source="38736" target="38858" cy:directed="1"/>
      <edge id="42140" label="1000010110 (1) 1000110110" source="38736" target="38331" cy:directed="1"/>
      <edge id="42139" label="1000010110 (1) 1001010110" source="38736" target="38671" cy:directed="1"/>
      <edge id="42138" label="1000010110 (1) 1010010110" source="38736" target="38712" cy:directed="1"/>
      <edge id="42137" label="1001010100 (1) 1001010110" source="38735" target="38671" cy:directed="1"/>
      <edge id="42136" label="1001010100 (1) 1001010000" source="38735" target="38946" cy:directed="1"/>
      <edge id="42135" label="1001010100 (1) 1001011100" source="38735" target="38758" cy:directed="1"/>
      <edge id="42134" label="1001010100 (1) 1001000100" source="38735" target="38856" cy:directed="1"/>
      <edge id="42133" label="1001010100 (1) 1001110100" source="38735" target="38748" cy:directed="1"/>
      <edge id="42132" label="1001010100 (1) 1011010100" source="38735" target="38670" cy:directed="1"/>
      <edge id="42131" label="1010010100 (1) 1010010110" source="38734" target="38712" cy:directed="1"/>
      <edge id="42130" label="1010010100 (1) 1010010000" source="38734" target="38928" cy:directed="1"/>
      <edge id="42129" label="1010010100 (1) 1010011100" source="38734" target="38771" cy:directed="1"/>
      <edge id="42128" label="1010010100 (1) 1010000100" source="38734" target="38855" cy:directed="1"/>
      <edge id="42127" label="1010010100 (1) 1010110100" source="38734" target="38761" cy:directed="1"/>
      <edge id="42126" label="1101110100 (1) 1101110000" source="38733" target="38939" cy:directed="1"/>
      <edge id="42125" label="1101110100 (1) 1101111100" source="38733" target="38633" cy:directed="1"/>
      <edge id="42124" label="1101110100 (1) 1001110100" source="38733" target="38748" cy:directed="1"/>
      <edge id="42123" label="0101110100 (1) 0101110000" source="38732" target="38934" cy:directed="1"/>
      <edge id="42122" label="0101110100 (1) 0101111100" source="38732" target="38632" cy:directed="1"/>
      <edge id="42121" label="0101110100 (1) 0001110100" source="38732" target="38744" cy:directed="1"/>
      <edge id="42120" label="0111011010 (1) 0111011110" source="38731" target="38361" cy:directed="1"/>
      <edge id="42119" label="0111011010 (1) 0111010010" source="38731" target="38886" cy:directed="1"/>
      <edge id="42118" label="0111011010 (1) 0111001010" source="38731" target="38831" cy:directed="1"/>
      <edge id="42117" label="0111011010 (1) 0111111010" source="38731" target="38316" cy:directed="1"/>
      <edge id="42116" label="0111011010 (1) 0110011010" source="38731" target="38764" cy:directed="1"/>
      <edge id="42115" label="0111011010 (1) 0101011010" source="38731" target="38751" cy:directed="1"/>
      <edge id="42114" label="0111011010 (1) 0011011010" source="38731" target="38743" cy:directed="1"/>
      <edge id="42113" label="0111011100 (1) 0111011110" source="38730" target="38361" cy:directed="1"/>
      <edge id="42112" label="0111011100 (1) 0111001100" source="38730" target="38552" cy:directed="1"/>
      <edge id="42111" label="0111011100 (1) 0111111100" source="38730" target="38606" cy:directed="1"/>
      <edge id="42110" label="0111011100 (1) 0110011100" source="38730" target="38763" cy:directed="1"/>
      <edge id="42109" label="0111011100 (1) 0101011100" source="38730" target="38750" cy:directed="1"/>
      <edge id="42108" label="0111011100 (1) 0011011100" source="38730" target="38742" cy:directed="1"/>
      <edge id="42107" label="1111011010 (1) 1111011110" source="38729" target="38360" cy:directed="1"/>
      <edge id="42106" label="1111011010 (1) 1111010010" source="38729" target="38883" cy:directed="1"/>
      <edge id="42105" label="1111011010 (1) 1111001010" source="38729" target="38839" cy:directed="1"/>
      <edge id="42104" label="1111011010 (1) 1111111010" source="38729" target="38326" cy:directed="1"/>
      <edge id="42103" label="1111011010 (1) 1110011010" source="38729" target="38767" cy:directed="1"/>
      <edge id="42102" label="1111011010 (1) 1101011010" source="38729" target="38753" cy:directed="1"/>
      <edge id="42101" label="1111011010 (1) 1011011010" source="38729" target="38747" cy:directed="1"/>
      <edge id="42100" label="1111011100 (1) 1111011110" source="38728" target="38360" cy:directed="1"/>
      <edge id="42099" label="1111011100 (1) 1111001100" source="38728" target="38561" cy:directed="1"/>
      <edge id="42098" label="1111011100 (1) 1111111100" source="38728" target="38607" cy:directed="1"/>
      <edge id="42097" label="1111011100 (1) 1110011100" source="38728" target="38766" cy:directed="1"/>
      <edge id="42096" label="1111011100 (1) 1101011100" source="38728" target="38752" cy:directed="1"/>
      <edge id="42095" label="1111011100 (1) 1011011100" source="38728" target="38746" cy:directed="1"/>
      <edge id="42094" label="0100010100 (1) 0100010110" source="38727" target="38726" cy:directed="1"/>
      <edge id="42093" label="0100010100 (1) 0100010000" source="38727" target="38933" cy:directed="1"/>
      <edge id="42092" label="0100010100 (1) 0100011100" source="38727" target="38779" cy:directed="1"/>
      <edge id="42091" label="0100010100 (1) 0100000100" source="38727" target="38836" cy:directed="1"/>
      <edge id="42090" label="0100010100 (1) 0100110100" source="38727" target="38762" cy:directed="1"/>
      <edge id="42089" label="0100010100 (1) 0101010100" source="38727" target="38725" cy:directed="1"/>
      <edge id="42088" label="0100010100 (1) 0000010100" source="38727" target="38741" cy:directed="1"/>
      <edge id="42087" label="0100010110 (1) 0100010010" source="38726" target="38932" cy:directed="1"/>
      <edge id="42086" label="0100010110 (1) 0100000110" source="38726" target="38835" cy:directed="1"/>
      <edge id="42085" label="0100010110 (1) 0100110110" source="38726" target="38317" cy:directed="1"/>
      <edge id="42084" label="0100010110 (1) 0101010110" source="38726" target="38666" cy:directed="1"/>
      <edge id="42083" label="0100010110 (1) 0000010110" source="38726" target="38740" cy:directed="1"/>
      <edge id="42082" label="0101010100 (1) 0101010110" source="38725" target="38666" cy:directed="1"/>
      <edge id="42081" label="0101010100 (1) 0101010000" source="38725" target="38930" cy:directed="1"/>
      <edge id="42080" label="0101010100 (1) 0101011100" source="38725" target="38750" cy:directed="1"/>
      <edge id="42079" label="0101010100 (1) 0101000100" source="38725" target="38833" cy:directed="1"/>
      <edge id="42078" label="0101010100 (1) 0101110100" source="38725" target="38732" cy:directed="1"/>
      <edge id="42077" label="0101010100 (1) 0001010100" source="38725" target="38739" cy:directed="1"/>
      <edge id="42076" label="1100010100 (1) 1100010110" source="38724" target="38723" cy:directed="1"/>
      <edge id="42075" label="1100010100 (1) 1100010000" source="38724" target="38938" cy:directed="1"/>
      <edge id="42074" label="1100010100 (1) 1100011100" source="38724" target="38783" cy:directed="1"/>
      <edge id="42073" label="1100010100 (1) 1100000100" source="38724" target="38854" cy:directed="1"/>
      <edge id="42072" label="1100010100 (1) 1100110100" source="38724" target="38765" cy:directed="1"/>
      <edge id="42071" label="1100010100 (1) 1101010100" source="38724" target="38722" cy:directed="1"/>
      <edge id="42070" label="1100010100 (1) 1000010100" source="38724" target="38737" cy:directed="1"/>
      <edge id="42069" label="1100010110 (1) 1100010010" source="38723" target="38937" cy:directed="1"/>
      <edge id="42068" label="1100010110 (1) 1100000110" source="38723" target="38842" cy:directed="1"/>
      <edge id="42067" label="1100010110 (1) 1100110110" source="38723" target="38327" cy:directed="1"/>
      <edge id="42066" label="1100010110 (1) 1101010110" source="38723" target="38665" cy:directed="1"/>
      <edge id="42065" label="1100010110 (1) 1000010110" source="38723" target="38736" cy:directed="1"/>
      <edge id="42064" label="1101010100 (1) 1101010110" source="38722" target="38665" cy:directed="1"/>
      <edge id="42063" label="1101010100 (1) 1101010000" source="38722" target="38935" cy:directed="1"/>
      <edge id="42062" label="1101010100 (1) 1101011100" source="38722" target="38752" cy:directed="1"/>
      <edge id="42061" label="1101010100 (1) 1101000100" source="38722" target="38840" cy:directed="1"/>
      <edge id="42060" label="1101010100 (1) 1101110100" source="38722" target="38733" cy:directed="1"/>
      <edge id="42059" label="1101010100 (1) 1001010100" source="38722" target="38735" cy:directed="1"/>
      <edge id="42058" label="1000111100 (1) 1000011100" source="38721" target="38792" cy:directed="1"/>
      <edge id="42057" label="1000111100 (1) 1001111100" source="38721" target="38645" cy:directed="1"/>
      <edge id="42056" label="1000111100 (1) 1010111100" source="38721" target="38696" cy:directed="1"/>
      <edge id="42055" label="0000111100 (1) 0000011100" source="38720" target="38790" cy:directed="1"/>
      <edge id="42054" label="0000111100 (1) 0001111100" source="38720" target="38642" cy:directed="1"/>
      <edge id="42053" label="0000111100 (1) 0010111100" source="38720" target="38694" cy:directed="1"/>
      <edge id="42052" label="1111100010 (1) 1111100000" source="38719" target="38973" cy:directed="1"/>
      <edge id="42051" label="1111100010 (1) 1111110010" source="38719" target="38597" cy:directed="1"/>
      <edge id="42050" label="1111100010 (1) 1110100010" source="38719" target="38668" cy:directed="1"/>
      <edge id="42049" label="1111100010 (1) 1101100010" source="38719" target="38749" cy:directed="1"/>
      <edge id="42048" label="1100111100 (1) 1100011100" source="38718" target="38783" cy:directed="1"/>
      <edge id="42047" label="1100111100 (1) 1101111100" source="38718" target="38633" cy:directed="1"/>
      <edge id="42046" label="1100111100 (1) 1000111100" source="38718" target="38721" cy:directed="1"/>
      <edge id="42045" label="1011110100 (1) 1011110000" source="38717" target="38929" cy:directed="1"/>
      <edge id="42044" label="1011110100 (1) 1011111100" source="38717" target="38616" cy:directed="1"/>
      <edge id="42043" label="1011110100 (1) 1010110100" source="38717" target="38761" cy:directed="1"/>
      <edge id="42042" label="0011110100 (1) 0011110000" source="38716" target="38925" cy:directed="1"/>
      <edge id="42041" label="0011110100 (1) 0011111100" source="38716" target="38618" cy:directed="1"/>
      <edge id="42040" label="0011110100 (1) 0010110100" source="38716" target="38760" cy:directed="1"/>
      <edge id="42039" label="0111100010 (1) 0111100000" source="38715" target="38970" cy:directed="1"/>
      <edge id="42038" label="0111100010 (1) 0111110010" source="38715" target="38589" cy:directed="1"/>
      <edge id="42037" label="0111100010 (1) 0110100010" source="38715" target="38654" cy:directed="1"/>
      <edge id="42036" label="0111100010 (1) 0101100010" source="38715" target="38745" cy:directed="1"/>
      <edge id="42035" label="0111100010 (1) 0011100010" source="38715" target="38619" cy:directed="1"/>
      <edge id="42034" label="0100111100 (1) 0100011100" source="38714" target="38779" cy:directed="1"/>
      <edge id="42033" label="0100111100 (1) 0101111100" source="38714" target="38632" cy:directed="1"/>
      <edge id="42032" label="0100111100 (1) 0000111100" source="38714" target="38720" cy:directed="1"/>
      <edge id="42031" label="0010010110 (1) 0010010010" source="38713" target="38923" cy:directed="1"/>
      <edge id="42030" label="0010010110 (1) 0010000110" source="38713" target="38817" cy:directed="1"/>
      <edge id="42029" label="0010010110 (1) 0010110110" source="38713" target="38296" cy:directed="1"/>
      <edge id="42028" label="1010010110 (1) 1010010010" source="38712" target="38927" cy:directed="1"/>
      <edge id="42027" label="1010010110 (1) 1010000110" source="38712" target="38820" cy:directed="1"/>
      <edge id="42026" label="1010010110 (1) 1010110110" source="38712" target="38297" cy:directed="1"/>
      <edge id="42025" label="1111110100 (1) 1111110000" source="38711" target="38921" cy:directed="1"/>
      <edge id="42024" label="1111110100 (1) 1111111100" source="38711" target="38607" cy:directed="1"/>
      <edge id="42023" label="1111110100 (1) 1110110100" source="38711" target="38757" cy:directed="1"/>
      <edge id="42022" label="1111110100 (1) 1101110100" source="38711" target="38733" cy:directed="1"/>
      <edge id="42021" label="1111110100 (1) 1011110100" source="38711" target="38717" cy:directed="1"/>
      <edge id="42020" label="0111110100 (1) 0111110000" source="38710" target="38917" cy:directed="1"/>
      <edge id="42019" label="0111110100 (1) 0111111100" source="38710" target="38606" cy:directed="1"/>
      <edge id="42018" label="0111110100 (1) 0110110100" source="38710" target="38754" cy:directed="1"/>
      <edge id="42017" label="0111110100 (1) 0101110100" source="38710" target="38732" cy:directed="1"/>
      <edge id="42016" label="0111110100 (1) 0011110100" source="38710" target="38716" cy:directed="1"/>
      <edge id="42015" label="0110010100 (1) 0110010110" source="38709" target="38708" cy:directed="1"/>
      <edge id="42014" label="0110010100 (1) 0110010000" source="38709" target="38916" cy:directed="1"/>
      <edge id="42013" label="0110010100 (1) 0110011100" source="38709" target="38763" cy:directed="1"/>
      <edge id="42012" label="0110010100 (1) 0110000100" source="38709" target="38810" cy:directed="1"/>
      <edge id="42011" label="0110010100 (1) 0110110100" source="38709" target="38754" cy:directed="1"/>
      <edge id="42010" label="0110010100 (1) 0100010100" source="38709" target="38727" cy:directed="1"/>
      <edge id="42009" label="0110010100 (1) 0010010100" source="38709" target="38738" cy:directed="1"/>
      <edge id="42008" label="0110010110 (1) 0110010010" source="38708" target="38915" cy:directed="1"/>
      <edge id="42007" label="0110010110 (1) 0110000110" source="38708" target="38809" cy:directed="1"/>
      <edge id="42006" label="0110010110 (1) 0110110110" source="38708" target="38285" cy:directed="1"/>
      <edge id="42005" label="0110010110 (1) 0100010110" source="38708" target="38726" cy:directed="1"/>
      <edge id="42004" label="0110010110 (1) 0010010110" source="38708" target="38713" cy:directed="1"/>
      <edge id="42003" label="1110010100 (1) 1110010110" source="38707" target="38706" cy:directed="1"/>
      <edge id="42002" label="1110010100 (1) 1110010000" source="38707" target="38920" cy:directed="1"/>
      <edge id="42001" label="1110010100 (1) 1110011100" source="38707" target="38766" cy:directed="1"/>
      <edge id="42000" label="1110010100 (1) 1110000100" source="38707" target="38818" cy:directed="1"/>
      <edge id="41999" label="1110010100 (1) 1110110100" source="38707" target="38757" cy:directed="1"/>
      <edge id="41998" label="1110010100 (1) 1100010100" source="38707" target="38724" cy:directed="1"/>
      <edge id="41997" label="1110010100 (1) 1010010100" source="38707" target="38734" cy:directed="1"/>
      <edge id="41996" label="1110010110 (1) 1110010010" source="38706" target="38919" cy:directed="1"/>
      <edge id="41995" label="1110010110 (1) 1110000110" source="38706" target="38813" cy:directed="1"/>
      <edge id="41994" label="1110010110 (1) 1110110110" source="38706" target="38286" cy:directed="1"/>
      <edge id="41993" label="1110010110 (1) 1100010110" source="38706" target="38723" cy:directed="1"/>
      <edge id="41992" label="1110010110 (1) 1010010110" source="38706" target="38712" cy:directed="1"/>
      <edge id="41991" label="1000100010 (1) 1000100000" source="38705" target="38969" cy:directed="1"/>
      <edge id="41990" label="1000100010 (1) 1000110010" source="38705" target="38704" cy:directed="1"/>
      <edge id="41989" label="1000100010 (1) 1000000010" source="38705" target="39001" cy:directed="1"/>
      <edge id="41988" label="1000100010 (1) 1001100010" source="38705" target="38703" cy:directed="1"/>
      <edge id="41987" label="1000100010 (1) 1010100010" source="38705" target="38702" cy:directed="1"/>
      <edge id="41986" label="1000100010 (1) 1100100010" source="38705" target="38701" cy:directed="1"/>
      <edge id="41985" label="1000110010 (1) 1000110000" source="38704" target="38968" cy:directed="1"/>
      <edge id="41984" label="1000110010 (1) 1000010010" source="38704" target="38948" cy:directed="1"/>
      <edge id="41983" label="1000110010 (1) 1001110010" source="38704" target="38625" cy:directed="1"/>
      <edge id="41982" label="1000110010 (1) 1010110010" source="38704" target="38669" cy:directed="1"/>
      <edge id="41981" label="1001100010 (1) 1001100000" source="38703" target="38967" cy:directed="1"/>
      <edge id="41980" label="1001100010 (1) 1001110010" source="38703" target="38625" cy:directed="1"/>
      <edge id="41979" label="1001100010 (1) 1001000010" source="38703" target="38984" cy:directed="1"/>
      <edge id="41978" label="1001100010 (1) 1011100010" source="38703" target="38624" cy:directed="1"/>
      <edge id="41977" label="1001100010 (1) 1101100010" source="38703" target="38749" cy:directed="1"/>
      <edge id="41976" label="1010100010 (1) 1010100000" source="38702" target="38966" cy:directed="1"/>
      <edge id="41975" label="1010100010 (1) 1010110010" source="38702" target="38669" cy:directed="1"/>
      <edge id="41974" label="1010100010 (1) 1010000010" source="38702" target="38992" cy:directed="1"/>
      <edge id="41973" label="1010100010 (1) 1110100010" source="38702" target="38668" cy:directed="1"/>
      <edge id="41972" label="1100100010 (1) 1100100000" source="38701" target="38965" cy:directed="1"/>
      <edge id="41971" label="1100100010 (1) 1100110010" source="38701" target="38695" cy:directed="1"/>
      <edge id="41970" label="1100100010 (1) 1100000010" source="38701" target="38998" cy:directed="1"/>
      <edge id="41969" label="1100100010 (1) 1101100010" source="38701" target="38749" cy:directed="1"/>
      <edge id="41968" label="0000100010 (1) 0000100000" source="38700" target="38964" cy:directed="1"/>
      <edge id="41967" label="0000100010 (1) 0000110010" source="38700" target="38699" cy:directed="1"/>
      <edge id="41966" label="0000100010 (1) 0000000010" source="38700" target="39004" cy:directed="1"/>
      <edge id="41965" label="0000100010 (1) 0001100010" source="38700" target="38698" cy:directed="1"/>
      <edge id="41964" label="0000100010 (1) 0010100010" source="38700" target="38697" cy:directed="1"/>
      <edge id="41963" label="0000110010 (1) 0000110000" source="38699" target="38963" cy:directed="1"/>
      <edge id="41962" label="0000110010 (1) 0000010010" source="38699" target="38942" cy:directed="1"/>
      <edge id="41961" label="0000110010 (1) 0001110010" source="38699" target="38620" cy:directed="1"/>
      <edge id="41960" label="0000110010 (1) 0010110010" source="38699" target="38667" cy:directed="1"/>
      <edge id="41959" label="0001100010 (1) 0001100000" source="38698" target="38962" cy:directed="1"/>
      <edge id="41958" label="0001100010 (1) 0001110010" source="38698" target="38620" cy:directed="1"/>
      <edge id="41957" label="0001100010 (1) 0001000010" source="38698" target="38985" cy:directed="1"/>
      <edge id="41956" label="0001100010 (1) 0011100010" source="38698" target="38619" cy:directed="1"/>
      <edge id="41955" label="0010100010 (1) 0010100000" source="38697" target="38961" cy:directed="1"/>
      <edge id="41954" label="0010100010 (1) 0010110010" source="38697" target="38667" cy:directed="1"/>
      <edge id="41953" label="0010100010 (1) 0010000010" source="38697" target="38989" cy:directed="1"/>
      <edge id="41952" label="1010111100 (1) 1010011100" source="38696" target="38771" cy:directed="1"/>
      <edge id="41951" label="1100110010 (1) 1100110000" source="38695" target="38960" cy:directed="1"/>
      <edge id="41950" label="1100110010 (1) 1100010010" source="38695" target="38937" cy:directed="1"/>
      <edge id="41949" label="1100110010 (1) 1101110010" source="38695" target="38617" cy:directed="1"/>
      <edge id="41948" label="1100110010 (1) 1000110010" source="38695" target="38704" cy:directed="1"/>
      <edge id="41947" label="0010111100 (1) 0010011100" source="38694" target="38769" cy:directed="1"/>
      <edge id="41946" label="0100100010 (1) 0100100000" source="38693" target="38959" cy:directed="1"/>
      <edge id="41945" label="0100100010 (1) 0100110010" source="38693" target="38692" cy:directed="1"/>
      <edge id="41944" label="0100100010 (1) 0100000010" source="38693" target="38995" cy:directed="1"/>
      <edge id="41943" label="0100100010 (1) 0101100010" source="38693" target="38745" cy:directed="1"/>
      <edge id="41942" label="0100100010 (1) 0000100010" source="38693" target="38700" cy:directed="1"/>
      <edge id="41941" label="0100110010 (1) 0100110000" source="38692" target="38958" cy:directed="1"/>
      <edge id="41940" label="0100110010 (1) 0100010010" source="38692" target="38932" cy:directed="1"/>
      <edge id="41939" label="0100110010 (1) 0101110010" source="38692" target="38608" cy:directed="1"/>
      <edge id="41938" label="0100110010 (1) 0000110010" source="38692" target="38699" cy:directed="1"/>
      <edge id="41937" label="0000000001 (1) 0000000011" source="38691" target="38690" cy:directed="1"/>
      <edge id="41936" label="0000000001 (1) 0000000101" source="38691" target="38689" cy:directed="1"/>
      <edge id="41935" label="0000000001 (1) 0001000001" source="38691" target="38688" cy:directed="1"/>
      <edge id="41934" label="0000000011 (1) 0000000111" source="38690" target="38315" cy:directed="1"/>
      <edge id="41933" label="0000000011 (1) 0001000011" source="38690" target="38615" cy:directed="1"/>
      <edge id="41932" label="0000000101 (1) 0000000111" source="38689" target="38315" cy:directed="1"/>
      <edge id="41931" label="0000000101 (1) 0000100101" source="38689" target="38572" cy:directed="1"/>
      <edge id="41930" label="0000000101 (1) 0001000101" source="38689" target="38614" cy:directed="1"/>
      <edge id="41929" label="0000000101 (1) 0010000101" source="38689" target="38646" cy:directed="1"/>
      <edge id="41928" label="0001000001 (1) 0001000011" source="38688" target="38615" cy:directed="1"/>
      <edge id="41927" label="0001000001 (1) 0001000101" source="38688" target="38614" cy:directed="1"/>
      <edge id="41926" label="1000000001 (1) 1000000011" source="38687" target="38686" cy:directed="1"/>
      <edge id="41925" label="1000000001 (1) 1000000101" source="38687" target="38685" cy:directed="1"/>
      <edge id="41924" label="1000000001 (1) 1001000001" source="38687" target="38684" cy:directed="1"/>
      <edge id="41923" label="1000000001 (1) 1100000001" source="38687" target="38683" cy:directed="1"/>
      <edge id="41922" label="1000000011 (1) 1000000111" source="38686" target="38325" cy:directed="1"/>
      <edge id="41921" label="1000000011 (1) 1001000011" source="38686" target="38613" cy:directed="1"/>
      <edge id="41920" label="1000000011 (1) 1100000011" source="38686" target="38680" cy:directed="1"/>
      <edge id="41919" label="1000000101 (1) 1000000111" source="38685" target="38325" cy:directed="1"/>
      <edge id="41918" label="1000000101 (1) 1000100101" source="38685" target="38567" cy:directed="1"/>
      <edge id="41917" label="1000000101 (1) 1001000101" source="38685" target="38612" cy:directed="1"/>
      <edge id="41916" label="1000000101 (1) 1010000101" source="38685" target="38650" cy:directed="1"/>
      <edge id="41915" label="1000000101 (1) 1100000101" source="38685" target="38679" cy:directed="1"/>
      <edge id="41914" label="1001000001 (1) 1001000011" source="38684" target="38613" cy:directed="1"/>
      <edge id="41913" label="1001000001 (1) 1001000101" source="38684" target="38612" cy:directed="1"/>
      <edge id="41912" label="1001000001 (1) 1101000001" source="38684" target="38678" cy:directed="1"/>
      <edge id="41911" label="1100000001 (1) 1100000011" source="38683" target="38680" cy:directed="1"/>
      <edge id="41910" label="1100000001 (1) 1100000101" source="38683" target="38679" cy:directed="1"/>
      <edge id="41909" label="1100000001 (1) 1101000001" source="38683" target="38678" cy:directed="1"/>
      <edge id="41908" label="1110111100 (1) 1110011100" source="38682" target="38766" cy:directed="1"/>
      <edge id="41907" label="1110111100 (1) 1100111100" source="38682" target="38718" cy:directed="1"/>
      <edge id="41906" label="1110111100 (1) 1010111100" source="38682" target="38696" cy:directed="1"/>
      <edge id="41905" label="0110111100 (1) 0110011100" source="38681" target="38763" cy:directed="1"/>
      <edge id="41904" label="0110111100 (1) 0100111100" source="38681" target="38714" cy:directed="1"/>
      <edge id="41903" label="0110111100 (1) 0010111100" source="38681" target="38694" cy:directed="1"/>
      <edge id="41902" label="1100000011 (1) 1100000111" source="38680" target="38314" cy:directed="1"/>
      <edge id="41901" label="1100000011 (1) 1101000011" source="38680" target="38605" cy:directed="1"/>
      <edge id="41900" label="1100000101 (1) 1100000111" source="38679" target="38314" cy:directed="1"/>
      <edge id="41899" label="1100000101 (1) 1100100101" source="38679" target="38559" cy:directed="1"/>
      <edge id="41898" label="1100000101 (1) 1101000101" source="38679" target="38604" cy:directed="1"/>
      <edge id="41897" label="1101000001 (1) 1101000011" source="38678" target="38605" cy:directed="1"/>
      <edge id="41896" label="1101000001 (1) 1101000101" source="38678" target="38604" cy:directed="1"/>
      <edge id="41895" label="1101000001 (1) 1101100001" source="38678" target="38603" cy:directed="1"/>
      <edge id="41894" label="0100000001 (1) 0100000011" source="38677" target="38676" cy:directed="1"/>
      <edge id="41893" label="0100000001 (1) 0100000101" source="38677" target="38675" cy:directed="1"/>
      <edge id="41892" label="0100000001 (1) 0101000001" source="38677" target="38674" cy:directed="1"/>
      <edge id="41891" label="0100000001 (1) 0000000001" source="38677" target="38691" cy:directed="1"/>
      <edge id="41890" label="0100000011 (1) 0100000111" source="38676" target="38308" cy:directed="1"/>
      <edge id="41889" label="0100000011 (1) 0101000011" source="38676" target="38602" cy:directed="1"/>
      <edge id="41888" label="0100000011 (1) 0000000011" source="38676" target="38690" cy:directed="1"/>
      <edge id="41887" label="0100000101 (1) 0100000111" source="38675" target="38308" cy:directed="1"/>
      <edge id="41886" label="0100000101 (1) 0100100101" source="38675" target="38556" cy:directed="1"/>
      <edge id="41885" label="0100000101 (1) 0101000101" source="38675" target="38601" cy:directed="1"/>
      <edge id="41884" label="0100000101 (1) 0000000101" source="38675" target="38689" cy:directed="1"/>
      <edge id="41883" label="0101000001 (1) 0101000011" source="38674" target="38602" cy:directed="1"/>
      <edge id="41882" label="0101000001 (1) 0101000101" source="38674" target="38601" cy:directed="1"/>
      <edge id="41881" label="0101000001 (1) 0101100001" source="38674" target="38600" cy:directed="1"/>
      <edge id="41880" label="0101000001 (1) 0001000001" source="38674" target="38688" cy:directed="1"/>
      <edge id="41879" label="0001010110 (1) 0001010010" source="38673" target="38911" cy:directed="1"/>
      <edge id="41878" label="0001010110 (1) 0001000110" source="38673" target="38800" cy:directed="1"/>
      <edge id="41877" label="0001010110 (1) 0001110110" source="38673" target="38265" cy:directed="1"/>
      <edge id="41876" label="0001010110 (1) 0011010110" source="38673" target="38631" cy:directed="1"/>
      <edge id="41875" label="0011010100 (1) 0011010110" source="38672" target="38631" cy:directed="1"/>
      <edge id="41874" label="0011010100 (1) 0011010000" source="38672" target="38890" cy:directed="1"/>
      <edge id="41873" label="0011010100 (1) 0011011100" source="38672" target="38742" cy:directed="1"/>
      <edge id="41872" label="0011010100 (1) 0011000100" source="38672" target="38798" cy:directed="1"/>
      <edge id="41871" label="0011010100 (1) 0011110100" source="38672" target="38716" cy:directed="1"/>
      <edge id="41870" label="0011010100 (1) 0010010100" source="38672" target="38738" cy:directed="1"/>
      <edge id="41869" label="1001010110 (1) 1001010010" source="38671" target="38913" cy:directed="1"/>
      <edge id="41868" label="1001010110 (1) 1001000110" source="38671" target="38803" cy:directed="1"/>
      <edge id="41867" label="1001010110 (1) 1001110110" source="38671" target="38266" cy:directed="1"/>
      <edge id="41866" label="1001010110 (1) 1011010110" source="38671" target="38630" cy:directed="1"/>
      <edge id="41865" label="1011010100 (1) 1011010110" source="38670" target="38630" cy:directed="1"/>
      <edge id="41864" label="1011010100 (1) 1011010000" source="38670" target="38893" cy:directed="1"/>
      <edge id="41863" label="1011010100 (1) 1011011100" source="38670" target="38746" cy:directed="1"/>
      <edge id="41862" label="1011010100 (1) 1011000100" source="38670" target="38801" cy:directed="1"/>
      <edge id="41861" label="1011010100 (1) 1011110100" source="38670" target="38717" cy:directed="1"/>
      <edge id="41860" label="1011010100 (1) 1010010100" source="38670" target="38734" cy:directed="1"/>
      <edge id="41859" label="1010110010 (1) 1010110000" source="38669" target="38957" cy:directed="1"/>
      <edge id="41858" label="1010110010 (1) 1010010010" source="38669" target="38927" cy:directed="1"/>
      <edge id="41857" label="1110100010 (1) 1110100000" source="38668" target="38956" cy:directed="1"/>
      <edge id="41856" label="1110100010 (1) 1110110010" source="38668" target="38664" cy:directed="1"/>
      <edge id="41855" label="1110100010 (1) 1110000010" source="38668" target="38988" cy:directed="1"/>
      <edge id="41854" label="1110100010 (1) 1100100010" source="38668" target="38701" cy:directed="1"/>
      <edge id="41853" label="0010110010 (1) 0010110000" source="38667" target="38955" cy:directed="1"/>
      <edge id="41852" label="0010110010 (1) 0010010010" source="38667" target="38923" cy:directed="1"/>
      <edge id="41851" label="0101010110 (1) 0101010010" source="38666" target="38907" cy:directed="1"/>
      <edge id="41850" label="0101010110 (1) 0101000110" source="38666" target="38795" cy:directed="1"/>
      <edge id="41849" label="0101010110 (1) 0101110110" source="38666" target="38260" cy:directed="1"/>
      <edge id="41848" label="0101010110 (1) 0001010110" source="38666" target="38673" cy:directed="1"/>
      <edge id="41847" label="1101010110 (1) 1101010010" source="38665" target="38909" cy:directed="1"/>
      <edge id="41846" label="1101010110 (1) 1101000110" source="38665" target="38797" cy:directed="1"/>
      <edge id="41845" label="1101010110 (1) 1101110110" source="38665" target="38261" cy:directed="1"/>
      <edge id="41844" label="1101010110 (1) 1001010110" source="38665" target="38671" cy:directed="1"/>
      <edge id="41843" label="1110110010 (1) 1110110000" source="38664" target="38954" cy:directed="1"/>
      <edge id="41842" label="1110110010 (1) 1110010010" source="38664" target="38919" cy:directed="1"/>
      <edge id="41841" label="1110110010 (1) 1100110010" source="38664" target="38695" cy:directed="1"/>
      <edge id="41840" label="1110110010 (1) 1010110010" source="38664" target="38669" cy:directed="1"/>
      <edge id="41839" label="1000001100 (1) 1000001110" source="38663" target="38662" cy:directed="1"/>
      <edge id="41838" label="1000001100 (1) 1000001000" source="38663" target="38905" cy:directed="1"/>
      <edge id="41837" label="1000001100 (1) 1000000100" source="38663" target="38859" cy:directed="1"/>
      <edge id="41836" label="1000001100 (1) 1001001100" source="38663" target="38661" cy:directed="1"/>
      <edge id="41835" label="1000001100 (1) 1010001100" source="38663" target="38660" cy:directed="1"/>
      <edge id="41834" label="1000001100 (1) 1100001100" source="38663" target="38659" cy:directed="1"/>
      <edge id="41833" label="1000001110 (1) 1000001010" source="38662" target="38904" cy:directed="1"/>
      <edge id="41832" label="1000001110 (1) 1000000110" source="38662" target="38858" cy:directed="1"/>
      <edge id="41831" label="1000001110 (1) 1001001110" source="38662" target="38596" cy:directed="1"/>
      <edge id="41830" label="1000001110 (1) 1010001110" source="38662" target="38623" cy:directed="1"/>
      <edge id="41829" label="1000001110 (1) 1100001110" source="38662" target="38644" cy:directed="1"/>
      <edge id="41828" label="1001001100 (1) 1001001110" source="38661" target="38596" cy:directed="1"/>
      <edge id="41827" label="1001001100 (1) 1001001000" source="38661" target="38903" cy:directed="1"/>
      <edge id="41826" label="1001001100 (1) 1001000100" source="38661" target="38856" cy:directed="1"/>
      <edge id="41825" label="1001001100 (1) 1011001100" source="38661" target="38595" cy:directed="1"/>
      <edge id="41824" label="1001001100 (1) 1101001100" source="38661" target="38643" cy:directed="1"/>
      <edge id="41823" label="1010001100 (1) 1010001110" source="38660" target="38623" cy:directed="1"/>
      <edge id="41822" label="1010001100 (1) 1010001000" source="38660" target="38881" cy:directed="1"/>
      <edge id="41821" label="1010001100 (1) 1010000100" source="38660" target="38855" cy:directed="1"/>
      <edge id="41820" label="1010001100 (1) 1110001100" source="38660" target="38622" cy:directed="1"/>
      <edge id="41819" label="1100001100 (1) 1100001110" source="38659" target="38644" cy:directed="1"/>
      <edge id="41818" label="1100001100 (1) 1100001000" source="38659" target="38902" cy:directed="1"/>
      <edge id="41817" label="1100001100 (1) 1100000100" source="38659" target="38854" cy:directed="1"/>
      <edge id="41816" label="1100001100 (1) 1101001100" source="38659" target="38643" cy:directed="1"/>
      <edge id="41815" label="0000001100 (1) 0000001110" source="38658" target="38657" cy:directed="1"/>
      <edge id="41814" label="0000001100 (1) 0000001000" source="38658" target="38901" cy:directed="1"/>
      <edge id="41813" label="0000001100 (1) 0000000100" source="38658" target="38850" cy:directed="1"/>
      <edge id="41812" label="0000001100 (1) 0001001100" source="38658" target="38656" cy:directed="1"/>
      <edge id="41811" label="0000001100 (1) 0010001100" source="38658" target="38655" cy:directed="1"/>
      <edge id="41810" label="0000001110 (1) 0000001010" source="38657" target="38900" cy:directed="1"/>
      <edge id="41809" label="0000001110 (1) 0000000110" source="38657" target="38849" cy:directed="1"/>
      <edge id="41808" label="0000001110 (1) 0001001110" source="38657" target="38591" cy:directed="1"/>
      <edge id="41807" label="0000001110 (1) 0010001110" source="38657" target="38621" cy:directed="1"/>
      <edge id="41806" label="0001001100 (1) 0001001110" source="38656" target="38591" cy:directed="1"/>
      <edge id="41805" label="0001001100 (1) 0001001000" source="38656" target="38899" cy:directed="1"/>
      <edge id="41804" label="0001001100 (1) 0001000100" source="38656" target="38847" cy:directed="1"/>
      <edge id="41803" label="0001001100 (1) 0011001100" source="38656" target="38590" cy:directed="1"/>
      <edge id="41802" label="0010001100 (1) 0010001110" source="38655" target="38621" cy:directed="1"/>
      <edge id="41801" label="0010001100 (1) 0010001000" source="38655" target="38878" cy:directed="1"/>
      <edge id="41800" label="0010001100 (1) 0010000100" source="38655" target="38846" cy:directed="1"/>
      <edge id="41799" label="0110100010 (1) 0110100000" source="38654" target="38953" cy:directed="1"/>
      <edge id="41798" label="0110100010 (1) 0110110010" source="38654" target="38653" cy:directed="1"/>
      <edge id="41797" label="0110100010 (1) 0110000010" source="38654" target="38986" cy:directed="1"/>
      <edge id="41796" label="0110100010 (1) 0100100010" source="38654" target="38693" cy:directed="1"/>
      <edge id="41795" label="0110100010 (1) 0010100010" source="38654" target="38697" cy:directed="1"/>
      <edge id="41794" label="0110110010 (1) 0110110000" source="38653" target="38952" cy:directed="1"/>
      <edge id="41793" label="0110110010 (1) 0110010010" source="38653" target="38915" cy:directed="1"/>
      <edge id="41792" label="0110110010 (1) 0100110010" source="38653" target="38692" cy:directed="1"/>
      <edge id="41791" label="0110110010 (1) 0010110010" source="38653" target="38667" cy:directed="1"/>
      <edge id="41790" label="1010000001 (1) 1010000011" source="38652" target="38651" cy:directed="1"/>
      <edge id="41789" label="1010000001 (1) 1010000101" source="38652" target="38650" cy:directed="1"/>
      <edge id="41788" label="1010000001 (1) 1000000001" source="38652" target="38687" cy:directed="1"/>
      <edge id="41787" label="1010000001 (1) 1110000001" source="38652" target="38649" cy:directed="1"/>
      <edge id="41786" label="1010000011 (1) 1010000111" source="38651" target="38283" cy:directed="1"/>
      <edge id="41785" label="1010000011 (1) 1000000011" source="38651" target="38686" cy:directed="1"/>
      <edge id="41784" label="1010000011 (1) 1110000011" source="38651" target="38638" cy:directed="1"/>
      <edge id="41783" label="1010000101 (1) 1010000111" source="38650" target="38283" cy:directed="1"/>
      <edge id="41782" label="1010000101 (1) 1010100101" source="38650" target="38540" cy:directed="1"/>
      <edge id="41781" label="1010000101 (1) 1110000101" source="38650" target="38637" cy:directed="1"/>
      <edge id="41780" label="1110000001 (1) 1110000011" source="38649" target="38638" cy:directed="1"/>
      <edge id="41779" label="1110000001 (1) 1110000101" source="38649" target="38637" cy:directed="1"/>
      <edge id="41778" label="1110000001 (1) 1100000001" source="38649" target="38683" cy:directed="1"/>
      <edge id="41777" label="0010000001 (1) 0010000011" source="38648" target="38647" cy:directed="1"/>
      <edge id="41776" label="0010000001 (1) 0010000101" source="38648" target="38646" cy:directed="1"/>
      <edge id="41775" label="0010000001 (1) 0000000001" source="38648" target="38691" cy:directed="1"/>
      <edge id="41774" label="0010000011 (1) 0010000111" source="38647" target="38284" cy:directed="1"/>
      <edge id="41773" label="0010000011 (1) 0000000011" source="38647" target="38690" cy:directed="1"/>
      <edge id="41772" label="0010000101 (1) 0010000111" source="38646" target="38284" cy:directed="1"/>
      <edge id="41771" label="0010000101 (1) 0010100101" source="38646" target="38542" cy:directed="1"/>
      <edge id="41770" label="1001111100 (1) 1001011100" source="38645" target="38758" cy:directed="1"/>
      <edge id="41769" label="1001111100 (1) 1011111100" source="38645" target="38616" cy:directed="1"/>
      <edge id="41768" label="1100001110 (1) 1100001010" source="38644" target="38898" cy:directed="1"/>
      <edge id="41767" label="1100001110 (1) 1100000110" source="38644" target="38842" cy:directed="1"/>
      <edge id="41766" label="1100001110 (1) 1101001110" source="38644" target="38584" cy:directed="1"/>
      <edge id="41765" label="1101001100 (1) 1101001110" source="38643" target="38584" cy:directed="1"/>
      <edge id="41764" label="1101001100 (1) 1101001000" source="38643" target="38897" cy:directed="1"/>
      <edge id="41763" label="1101001100 (1) 1101000100" source="38643" target="38840" cy:directed="1"/>
      <edge id="41762" label="1101001100 (1) 1101101100" source="38643" target="38583" cy:directed="1"/>
      <edge id="41761" label="0001111100 (1) 0001011100" source="38642" target="38755" cy:directed="1"/>
      <edge id="41760" label="0001111100 (1) 0011111100" source="38642" target="38618" cy:directed="1"/>
      <edge id="41759" label="0100001100 (1) 0100001110" source="38641" target="38640" cy:directed="1"/>
      <edge id="41758" label="0100001100 (1) 0100001000" source="38641" target="38896" cy:directed="1"/>
      <edge id="41757" label="0100001100 (1) 0100000100" source="38641" target="38836" cy:directed="1"/>
      <edge id="41756" label="0100001100 (1) 0101001100" source="38641" target="38639" cy:directed="1"/>
      <edge id="41755" label="0100001100 (1) 0000001100" source="38641" target="38658" cy:directed="1"/>
      <edge id="41754" label="0100001110 (1) 0100001010" source="38640" target="38895" cy:directed="1"/>
      <edge id="41753" label="0100001110 (1) 0100000110" source="38640" target="38835" cy:directed="1"/>
      <edge id="41752" label="0100001110 (1) 0101001110" source="38640" target="38582" cy:directed="1"/>
      <edge id="41751" label="0100001110 (1) 0000001110" source="38640" target="38657" cy:directed="1"/>
      <edge id="41750" label="0101001100 (1) 0101001110" source="38639" target="38582" cy:directed="1"/>
      <edge id="41749" label="0101001100 (1) 0101001000" source="38639" target="38894" cy:directed="1"/>
      <edge id="41748" label="0101001100 (1) 0101000100" source="38639" target="38833" cy:directed="1"/>
      <edge id="41747" label="0101001100 (1) 0101101100" source="38639" target="38581" cy:directed="1"/>
      <edge id="41746" label="0101001100 (1) 0001001100" source="38639" target="38656" cy:directed="1"/>
      <edge id="41745" label="1110000011 (1) 1110000111" source="38638" target="38279" cy:directed="1"/>
      <edge id="41744" label="1110000011 (1) 1100000011" source="38638" target="38680" cy:directed="1"/>
      <edge id="41743" label="1110000101 (1) 1110000111" source="38637" target="38279" cy:directed="1"/>
      <edge id="41742" label="1110000101 (1) 1110100101" source="38637" target="38536" cy:directed="1"/>
      <edge id="41741" label="1110000101 (1) 1100000101" source="38637" target="38679" cy:directed="1"/>
      <edge id="41740" label="0110000001 (1) 0110000011" source="38636" target="38635" cy:directed="1"/>
      <edge id="41739" label="0110000001 (1) 0110000101" source="38636" target="38634" cy:directed="1"/>
      <edge id="41738" label="0110000001 (1) 0100000001" source="38636" target="38677" cy:directed="1"/>
      <edge id="41737" label="0110000001 (1) 0010000001" source="38636" target="38648" cy:directed="1"/>
      <edge id="41736" label="0110000011 (1) 0110000111" source="38635" target="38274" cy:directed="1"/>
      <edge id="41735" label="0110000011 (1) 0100000011" source="38635" target="38676" cy:directed="1"/>
      <edge id="41734" label="0110000011 (1) 0010000011" source="38635" target="38647" cy:directed="1"/>
      <edge id="41733" label="0110000101 (1) 0110000111" source="38634" target="38274" cy:directed="1"/>
      <edge id="41732" label="0110000101 (1) 0110100101" source="38634" target="38533" cy:directed="1"/>
      <edge id="41731" label="0110000101 (1) 0100000101" source="38634" target="38675" cy:directed="1"/>
      <edge id="41730" label="0110000101 (1) 0010000101" source="38634" target="38646" cy:directed="1"/>
      <edge id="41729" label="1101111100 (1) 1001111100" source="38633" target="38645" cy:directed="1"/>
      <edge id="41728" label="0101111100 (1) 0001111100" source="38632" target="38642" cy:directed="1"/>
      <edge id="41727" label="0011010110 (1) 0011010010" source="38631" target="38889" cy:directed="1"/>
      <edge id="41726" label="0011010110 (1) 0011000110" source="38631" target="38782" cy:directed="1"/>
      <edge id="41725" label="0011010110 (1) 0011110110" source="38631" target="38250" cy:directed="1"/>
      <edge id="41724" label="0011010110 (1) 0010010110" source="38631" target="38713" cy:directed="1"/>
      <edge id="41723" label="1011010110 (1) 1011010010" source="38630" target="38892" cy:directed="1"/>
      <edge id="41722" label="1011010110 (1) 1011000110" source="38630" target="38787" cy:directed="1"/>
      <edge id="41721" label="1011010110 (1) 1011110110" source="38630" target="38252" cy:directed="1"/>
      <edge id="41720" label="1011010110 (1) 1010010110" source="38630" target="38712" cy:directed="1"/>
      <edge id="41719" label="0111010100 (1) 0111010110" source="38629" target="38628" cy:directed="1"/>
      <edge id="41718" label="0111010100 (1) 0111010000" source="38629" target="38887" cy:directed="1"/>
      <edge id="41717" label="0111010100 (1) 0111011100" source="38629" target="38730" cy:directed="1"/>
      <edge id="41716" label="0111010100 (1) 0111000100" source="38629" target="38776" cy:directed="1"/>
      <edge id="41715" label="0111010100 (1) 0111110100" source="38629" target="38710" cy:directed="1"/>
      <edge id="41714" label="0111010100 (1) 0110010100" source="38629" target="38709" cy:directed="1"/>
      <edge id="41713" label="0111010100 (1) 0101010100" source="38629" target="38725" cy:directed="1"/>
      <edge id="41712" label="0111010100 (1) 0011010100" source="38629" target="38672" cy:directed="1"/>
      <edge id="41711" label="0111010110 (1) 0111010010" source="38628" target="38886" cy:directed="1"/>
      <edge id="41710" label="0111010110 (1) 0111000110" source="38628" target="38775" cy:directed="1"/>
      <edge id="41709" label="0111010110 (1) 0111110110" source="38628" target="38241" cy:directed="1"/>
      <edge id="41708" label="0111010110 (1) 0110010110" source="38628" target="38708" cy:directed="1"/>
      <edge id="41707" label="0111010110 (1) 0101010110" source="38628" target="38666" cy:directed="1"/>
      <edge id="41706" label="0111010110 (1) 0011010110" source="38628" target="38631" cy:directed="1"/>
      <edge id="41705" label="1111010100 (1) 1111010110" source="38627" target="38626" cy:directed="1"/>
      <edge id="41704" label="1111010100 (1) 1111010000" source="38627" target="38884" cy:directed="1"/>
      <edge id="41703" label="1111010100 (1) 1111011100" source="38627" target="38728" cy:directed="1"/>
      <edge id="41702" label="1111010100 (1) 1111000100" source="38627" target="38785" cy:directed="1"/>
      <edge id="41701" label="1111010100 (1) 1111110100" source="38627" target="38711" cy:directed="1"/>
      <edge id="41700" label="1111010100 (1) 1110010100" source="38627" target="38707" cy:directed="1"/>
      <edge id="41699" label="1111010100 (1) 1101010100" source="38627" target="38722" cy:directed="1"/>
      <edge id="41698" label="1111010100 (1) 1011010100" source="38627" target="38670" cy:directed="1"/>
      <edge id="41697" label="1111010110 (1) 1111010010" source="38626" target="38883" cy:directed="1"/>
      <edge id="41696" label="1111010110 (1) 1111000110" source="38626" target="38778" cy:directed="1"/>
      <edge id="41695" label="1111010110 (1) 1111110110" source="38626" target="38240" cy:directed="1"/>
      <edge id="41694" label="1111010110 (1) 1110010110" source="38626" target="38706" cy:directed="1"/>
      <edge id="41693" label="1111010110 (1) 1101010110" source="38626" target="38665" cy:directed="1"/>
      <edge id="41692" label="1111010110 (1) 1011010110" source="38626" target="38630" cy:directed="1"/>
      <edge id="41691" label="1001110010 (1) 1001110000" source="38625" target="38951" cy:directed="1"/>
      <edge id="41690" label="1001110010 (1) 1001010010" source="38625" target="38913" cy:directed="1"/>
      <edge id="41689" label="1001110010 (1) 1011110010" source="38625" target="38599" cy:directed="1"/>
      <edge id="41688" label="1011100010 (1) 1011100000" source="38624" target="38950" cy:directed="1"/>
      <edge id="41687" label="1011100010 (1) 1011110010" source="38624" target="38599" cy:directed="1"/>
      <edge id="41686" label="1011100010 (1) 1011000010" source="38624" target="38978" cy:directed="1"/>
      <edge id="41685" label="1011100010 (1) 1010100010" source="38624" target="38702" cy:directed="1"/>
      <edge id="41684" label="1011100010 (1) 1111100010" source="38624" target="38719" cy:directed="1"/>
      <edge id="41683" label="1010001110 (1) 1010001010" source="38623" target="38880" cy:directed="1"/>
      <edge id="41682" label="1010001110 (1) 1010000110" source="38623" target="38820" cy:directed="1"/>
      <edge id="41681" label="1010001110 (1) 1110001110" source="38623" target="38609" cy:directed="1"/>
      <edge id="41680" label="1110001100 (1) 1110001110" source="38622" target="38609" cy:directed="1"/>
      <edge id="41679" label="1110001100 (1) 1110001000" source="38622" target="38879" cy:directed="1"/>
      <edge id="41678" label="1110001100 (1) 1110000100" source="38622" target="38818" cy:directed="1"/>
      <edge id="41677" label="1110001100 (1) 1100001100" source="38622" target="38659" cy:directed="1"/>
      <edge id="41676" label="0010001110 (1) 0010001010" source="38621" target="38877" cy:directed="1"/>
      <edge id="41675" label="0010001110 (1) 0010000110" source="38621" target="38817" cy:directed="1"/>
      <edge id="41674" label="0001110010 (1) 0001110000" source="38620" target="38945" cy:directed="1"/>
      <edge id="41673" label="0001110010 (1) 0001010010" source="38620" target="38911" cy:directed="1"/>
      <edge id="41672" label="0001110010 (1) 0011110010" source="38620" target="38598" cy:directed="1"/>
      <edge id="41671" label="0011100010 (1) 0011100000" source="38619" target="38944" cy:directed="1"/>
      <edge id="41670" label="0011100010 (1) 0011110010" source="38619" target="38598" cy:directed="1"/>
      <edge id="41669" label="0011100010 (1) 0011000010" source="38619" target="38975" cy:directed="1"/>
      <edge id="41668" label="0011100010 (1) 0010100010" source="38619" target="38697" cy:directed="1"/>
      <edge id="41667" label="0011111100 (1) 0011011100" source="38618" target="38742" cy:directed="1"/>
      <edge id="41666" label="0011111100 (1) 0010111100" source="38618" target="38694" cy:directed="1"/>
      <edge id="41665" label="1101110010 (1) 1101110000" source="38617" target="38939" cy:directed="1"/>
      <edge id="41664" label="1101110010 (1) 1001110010" source="38617" target="38625" cy:directed="1"/>
      <edge id="41663" label="1011111100 (1) 1011011100" source="38616" target="38746" cy:directed="1"/>
      <edge id="41662" label="1011111100 (1) 1010111100" source="38616" target="38696" cy:directed="1"/>
      <edge id="41661" label="0001000011 (1) 0001000111" source="38615" target="38259" cy:directed="1"/>
      <edge id="41660" label="0001000101 (1) 0001000111" source="38614" target="38259" cy:directed="1"/>
      <edge id="41659" label="0001000101 (1) 0001100101" source="38614" target="38519" cy:directed="1"/>
      <edge id="41658" label="0001000101 (1) 0011000101" source="38614" target="38592" cy:directed="1"/>
      <edge id="41657" label="1001000011 (1) 1001000111" source="38613" target="38258" cy:directed="1"/>
      <edge id="41656" label="1001000011 (1) 1101000011" source="38613" target="38605" cy:directed="1"/>
      <edge id="41655" label="1001000101 (1) 1001000111" source="38612" target="38258" cy:directed="1"/>
      <edge id="41654" label="1001000101 (1) 1001100101" source="38612" target="38516" cy:directed="1"/>
      <edge id="41653" label="1001000101 (1) 1011000101" source="38612" target="38586" cy:directed="1"/>
      <edge id="41652" label="1001000101 (1) 1101000101" source="38612" target="38604" cy:directed="1"/>
      <edge id="41651" label="0110001100 (1) 0110001110" source="38611" target="38610" cy:directed="1"/>
      <edge id="41650" label="0110001100 (1) 0110001000" source="38611" target="38873" cy:directed="1"/>
      <edge id="41649" label="0110001100 (1) 0110000100" source="38611" target="38810" cy:directed="1"/>
      <edge id="41648" label="0110001100 (1) 0100001100" source="38611" target="38641" cy:directed="1"/>
      <edge id="41647" label="0110001100 (1) 0010001100" source="38611" target="38655" cy:directed="1"/>
      <edge id="41646" label="0110001110 (1) 0110001010" source="38610" target="38872" cy:directed="1"/>
      <edge id="41645" label="0110001110 (1) 0110000110" source="38610" target="38809" cy:directed="1"/>
      <edge id="41644" label="0110001110 (1) 0100001110" source="38610" target="38640" cy:directed="1"/>
      <edge id="41643" label="0110001110 (1) 0010001110" source="38610" target="38621" cy:directed="1"/>
      <edge id="41642" label="1110001110 (1) 1110001010" source="38609" target="38875" cy:directed="1"/>
      <edge id="41641" label="1110001110 (1) 1110000110" source="38609" target="38813" cy:directed="1"/>
      <edge id="41640" label="1110001110 (1) 1100001110" source="38609" target="38644" cy:directed="1"/>
      <edge id="41639" label="0101110010 (1) 0101110000" source="38608" target="38934" cy:directed="1"/>
      <edge id="41638" label="0101110010 (1) 0001110010" source="38608" target="38620" cy:directed="1"/>
      <edge id="41637" label="1111111100 (1) 1110111100" source="38607" target="38682" cy:directed="1"/>
      <edge id="41636" label="1111111100 (1) 1101111100" source="38607" target="38633" cy:directed="1"/>
      <edge id="41635" label="1111111100 (1) 1011111100" source="38607" target="38616" cy:directed="1"/>
      <edge id="41634" label="0111111100 (1) 0110111100" source="38606" target="38681" cy:directed="1"/>
      <edge id="41633" label="0111111100 (1) 0101111100" source="38606" target="38632" cy:directed="1"/>
      <edge id="41632" label="0111111100 (1) 0011111100" source="38606" target="38618" cy:directed="1"/>
      <edge id="41631" label="1101000011 (1) 1101000111" source="38605" target="38257" cy:directed="1"/>
      <edge id="41630" label="1101000011 (1) 1101100011" source="38605" target="38199" cy:directed="1"/>
      <edge id="41629" label="1101000101 (1) 1101000111" source="38604" target="38257" cy:directed="1"/>
      <edge id="41628" label="1101000101 (1) 1101100101" source="38604" target="38513" cy:directed="1"/>
      <edge id="41627" label="1101100001 (1) 1101100101" source="38603" target="38513" cy:directed="1"/>
      <edge id="41626" label="1101100001 (1) 1101110001" source="38603" target="38512" cy:directed="1"/>
      <edge id="41625" label="0101000011 (1) 0101000111" source="38602" target="38256" cy:directed="1"/>
      <edge id="41624" label="0101000011 (1) 0101100011" source="38602" target="38197" cy:directed="1"/>
      <edge id="41623" label="0101000011 (1) 0001000011" source="38602" target="38615" cy:directed="1"/>
      <edge id="41622" label="0101000101 (1) 0101000111" source="38601" target="38256" cy:directed="1"/>
      <edge id="41621" label="0101000101 (1) 0101100101" source="38601" target="38506" cy:directed="1"/>
      <edge id="41620" label="0101000101 (1) 0001000101" source="38601" target="38614" cy:directed="1"/>
      <edge id="41619" label="0101100001 (1) 0101100101" source="38600" target="38506" cy:directed="1"/>
      <edge id="41618" label="0101100001 (1) 0101110001" source="38600" target="38505" cy:directed="1"/>
      <edge id="41617" label="0101100001 (1) 0001100001" source="38600" target="38570" cy:directed="1"/>
      <edge id="41616" label="1011110010 (1) 1011110000" source="38599" target="38929" cy:directed="1"/>
      <edge id="41615" label="1011110010 (1) 1011010010" source="38599" target="38892" cy:directed="1"/>
      <edge id="41614" label="1011110010 (1) 1010110010" source="38599" target="38669" cy:directed="1"/>
      <edge id="41613" label="0011110010 (1) 0011110000" source="38598" target="38925" cy:directed="1"/>
      <edge id="41612" label="0011110010 (1) 0011010010" source="38598" target="38889" cy:directed="1"/>
      <edge id="41611" label="0011110010 (1) 0010110010" source="38598" target="38667" cy:directed="1"/>
      <edge id="41610" label="1111110010 (1) 1111110000" source="38597" target="38921" cy:directed="1"/>
      <edge id="41609" label="1111110010 (1) 1110110010" source="38597" target="38664" cy:directed="1"/>
      <edge id="41608" label="1111110010 (1) 1101110010" source="38597" target="38617" cy:directed="1"/>
      <edge id="41607" label="1111110010 (1) 1011110010" source="38597" target="38599" cy:directed="1"/>
      <edge id="41606" label="1001001110 (1) 1001001010" source="38596" target="38868" cy:directed="1"/>
      <edge id="41605" label="1001001110 (1) 1001000110" source="38596" target="38803" cy:directed="1"/>
      <edge id="41604" label="1001001110 (1) 1011001110" source="38596" target="38562" cy:directed="1"/>
      <edge id="41603" label="1001001110 (1) 1101001110" source="38596" target="38584" cy:directed="1"/>
      <edge id="41602" label="1011001100 (1) 1011001110" source="38595" target="38562" cy:directed="1"/>
      <edge id="41601" label="1011001100 (1) 1011001000" source="38595" target="38853" cy:directed="1"/>
      <edge id="41600" label="1011001100 (1) 1011000100" source="38595" target="38801" cy:directed="1"/>
      <edge id="41599" label="1011001100 (1) 1010001100" source="38595" target="38660" cy:directed="1"/>
      <edge id="41598" label="1011001100 (1) 1111001100" source="38595" target="38561" cy:directed="1"/>
      <edge id="41597" label="0011000001 (1) 0011000011" source="38594" target="38593" cy:directed="1"/>
      <edge id="41596" label="0011000001 (1) 0011000101" source="38594" target="38592" cy:directed="1"/>
      <edge id="41595" label="0011000001 (1) 0010000001" source="38594" target="38648" cy:directed="1"/>
      <edge id="41594" label="0011000001 (1) 0001000001" source="38594" target="38688" cy:directed="1"/>
      <edge id="41593" label="0011000011 (1) 0011000111" source="38593" target="38239" cy:directed="1"/>
      <edge id="41592" label="0011000011 (1) 0010000011" source="38593" target="38647" cy:directed="1"/>
      <edge id="41591" label="0011000011 (1) 0001000011" source="38593" target="38615" cy:directed="1"/>
      <edge id="41590" label="0011000101 (1) 0011000111" source="38592" target="38239" cy:directed="1"/>
      <edge id="41589" label="0011000101 (1) 0011100101" source="38592" target="38496" cy:directed="1"/>
      <edge id="41588" label="0011000101 (1) 0010000101" source="38592" target="38646" cy:directed="1"/>
      <edge id="41587" label="0001001110 (1) 0001001010" source="38591" target="38867" cy:directed="1"/>
      <edge id="41586" label="0001001110 (1) 0001000110" source="38591" target="38800" cy:directed="1"/>
      <edge id="41585" label="0001001110 (1) 0011001110" source="38591" target="38560" cy:directed="1"/>
      <edge id="41584" label="0011001100 (1) 0011001110" source="38590" target="38560" cy:directed="1"/>
      <edge id="41583" label="0011001100 (1) 0011001000" source="38590" target="38845" cy:directed="1"/>
      <edge id="41582" label="0011001100 (1) 0011000100" source="38590" target="38798" cy:directed="1"/>
      <edge id="41581" label="0011001100 (1) 0010001100" source="38590" target="38655" cy:directed="1"/>
      <edge id="41580" label="0111110010 (1) 0111110000" source="38589" target="38917" cy:directed="1"/>
      <edge id="41579" label="0111110010 (1) 0110110010" source="38589" target="38653" cy:directed="1"/>
      <edge id="41578" label="0111110010 (1) 0101110010" source="38589" target="38608" cy:directed="1"/>
      <edge id="41577" label="0111110010 (1) 0011110010" source="38589" target="38598" cy:directed="1"/>
      <edge id="41576" label="1011000001 (1) 1011000011" source="38588" target="38587" cy:directed="1"/>
      <edge id="41575" label="1011000001 (1) 1011000101" source="38588" target="38586" cy:directed="1"/>
      <edge id="41574" label="1011000001 (1) 1010000001" source="38588" target="38652" cy:directed="1"/>
      <edge id="41573" label="1011000001 (1) 1001000001" source="38588" target="38684" cy:directed="1"/>
      <edge id="41572" label="1011000001 (1) 1111000001" source="38588" target="38585" cy:directed="1"/>
      <edge id="41571" label="1011000011 (1) 1011000111" source="38587" target="38238" cy:directed="1"/>
      <edge id="41570" label="1011000011 (1) 1010000011" source="38587" target="38651" cy:directed="1"/>
      <edge id="41569" label="1011000011 (1) 1001000011" source="38587" target="38613" cy:directed="1"/>
      <edge id="41568" label="1011000011 (1) 1111000011" source="38587" target="38580" cy:directed="1"/>
      <edge id="41567" label="1011000101 (1) 1011000111" source="38586" target="38238" cy:directed="1"/>
      <edge id="41566" label="1011000101 (1) 1011100101" source="38586" target="38494" cy:directed="1"/>
      <edge id="41565" label="1011000101 (1) 1010000101" source="38586" target="38650" cy:directed="1"/>
      <edge id="41564" label="1011000101 (1) 1111000101" source="38586" target="38579" cy:directed="1"/>
      <edge id="41563" label="1111000001 (1) 1111000011" source="38585" target="38580" cy:directed="1"/>
      <edge id="41562" label="1111000001 (1) 1111000101" source="38585" target="38579" cy:directed="1"/>
      <edge id="41561" label="1111000001 (1) 1111100001" source="38585" target="38578" cy:directed="1"/>
      <edge id="41560" label="1111000001 (1) 1110000001" source="38585" target="38649" cy:directed="1"/>
      <edge id="41559" label="1111000001 (1) 1101000001" source="38585" target="38678" cy:directed="1"/>
      <edge id="41558" label="1101001110 (1) 1101001010" source="38584" target="38864" cy:directed="1"/>
      <edge id="41557" label="1101001110 (1) 1101000110" source="38584" target="38797" cy:directed="1"/>
      <edge id="41556" label="1101001110 (1) 1101101110" source="38584" target="38181" cy:directed="1"/>
      <edge id="41555" label="1101101100 (1) 1101101000" source="38583" target="38863" cy:directed="1"/>
      <edge id="41554" label="1101101100 (1) 1101100100" source="38583" target="38796" cy:directed="1"/>
      <edge id="41553" label="1101101100 (1) 1101111100" source="38583" target="38633" cy:directed="1"/>
      <edge id="41552" label="0101001110 (1) 0101001010" source="38582" target="38861" cy:directed="1"/>
      <edge id="41551" label="0101001110 (1) 0101000110" source="38582" target="38795" cy:directed="1"/>
      <edge id="41550" label="0101001110 (1) 0101101110" source="38582" target="38180" cy:directed="1"/>
      <edge id="41549" label="0101001110 (1) 0001001110" source="38582" target="38591" cy:directed="1"/>
      <edge id="41548" label="0101101100 (1) 0101101000" source="38581" target="38860" cy:directed="1"/>
      <edge id="41547" label="0101101100 (1) 0101100100" source="38581" target="38794" cy:directed="1"/>
      <edge id="41546" label="0101101100 (1) 0101111100" source="38581" target="38632" cy:directed="1"/>
      <edge id="41545" label="0101101100 (1) 0001101100" source="38581" target="38548" cy:directed="1"/>
      <edge id="41544" label="1111000011 (1) 1111000111" source="38580" target="38231" cy:directed="1"/>
      <edge id="41543" label="1111000011 (1) 1111100011" source="38580" target="38176" cy:directed="1"/>
      <edge id="41542" label="1111000011 (1) 1110000011" source="38580" target="38638" cy:directed="1"/>
      <edge id="41541" label="1111000011 (1) 1101000011" source="38580" target="38605" cy:directed="1"/>
      <edge id="41540" label="1111000101 (1) 1111000111" source="38579" target="38231" cy:directed="1"/>
      <edge id="41539" label="1111000101 (1) 1111100101" source="38579" target="38479" cy:directed="1"/>
      <edge id="41538" label="1111000101 (1) 1110000101" source="38579" target="38637" cy:directed="1"/>
      <edge id="41537" label="1111000101 (1) 1101000101" source="38579" target="38604" cy:directed="1"/>
      <edge id="41536" label="1111100001 (1) 1111100101" source="38578" target="38479" cy:directed="1"/>
      <edge id="41535" label="1111100001 (1) 1111110001" source="38578" target="38478" cy:directed="1"/>
      <edge id="41534" label="1111100001 (1) 1110100001" source="38578" target="38538" cy:directed="1"/>
      <edge id="41533" label="1111100001 (1) 1101100001" source="38578" target="38603" cy:directed="1"/>
      <edge id="41532" label="0111000001 (1) 0111000011" source="38577" target="38576" cy:directed="1"/>
      <edge id="41531" label="0111000001 (1) 0111000101" source="38577" target="38575" cy:directed="1"/>
      <edge id="41530" label="0111000001 (1) 0111100001" source="38577" target="38574" cy:directed="1"/>
      <edge id="41529" label="0111000001 (1) 0110000001" source="38577" target="38636" cy:directed="1"/>
      <edge id="41528" label="0111000001 (1) 0101000001" source="38577" target="38674" cy:directed="1"/>
      <edge id="41527" label="0111000001 (1) 0011000001" source="38577" target="38594" cy:directed="1"/>
      <edge id="41526" label="0111000011 (1) 0111000111" source="38576" target="38230" cy:directed="1"/>
      <edge id="41525" label="0111000011 (1) 0111100011" source="38576" target="38175" cy:directed="1"/>
      <edge id="41524" label="0111000011 (1) 0110000011" source="38576" target="38635" cy:directed="1"/>
      <edge id="41523" label="0111000011 (1) 0101000011" source="38576" target="38602" cy:directed="1"/>
      <edge id="41522" label="0111000011 (1) 0011000011" source="38576" target="38593" cy:directed="1"/>
      <edge id="41521" label="0111000101 (1) 0111000111" source="38575" target="38230" cy:directed="1"/>
      <edge id="41520" label="0111000101 (1) 0111100101" source="38575" target="38473" cy:directed="1"/>
      <edge id="41519" label="0111000101 (1) 0110000101" source="38575" target="38634" cy:directed="1"/>
      <edge id="41518" label="0111000101 (1) 0101000101" source="38575" target="38601" cy:directed="1"/>
      <edge id="41517" label="0111000101 (1) 0011000101" source="38575" target="38592" cy:directed="1"/>
      <edge id="41516" label="0111100001 (1) 0111100101" source="38574" target="38473" cy:directed="1"/>
      <edge id="41515" label="0111100001 (1) 0111110001" source="38574" target="38472" cy:directed="1"/>
      <edge id="41514" label="0111100001 (1) 0110100001" source="38574" target="38534" cy:directed="1"/>
      <edge id="41513" label="0111100001 (1) 0101100001" source="38574" target="38600" cy:directed="1"/>
      <edge id="41512" label="0111100001 (1) 0011100001" source="38574" target="38517" cy:directed="1"/>
      <edge id="41511" label="0000100001 (1) 0000100101" source="38573" target="38572" cy:directed="1"/>
      <edge id="41510" label="0000100001 (1) 0000110001" source="38573" target="38571" cy:directed="1"/>
      <edge id="41509" label="0000100001 (1) 0000000001" source="38573" target="38691" cy:directed="1"/>
      <edge id="41508" label="0000100001 (1) 0001100001" source="38573" target="38570" cy:directed="1"/>
      <edge id="41507" label="0000100001 (1) 0010100001" source="38573" target="38569" cy:directed="1"/>
      <edge id="41506" label="0000100101 (1) 0000110101" source="38572" target="38371" cy:directed="1"/>
      <edge id="41505" label="0000100101 (1) 0001100101" source="38572" target="38519" cy:directed="1"/>
      <edge id="41504" label="0000100101 (1) 0010100101" source="38572" target="38542" cy:directed="1"/>
      <edge id="41503" label="0000110001 (1) 0000110101" source="38571" target="38371" cy:directed="1"/>
      <edge id="41502" label="0000110001 (1) 0000111001" source="38571" target="38370" cy:directed="1"/>
      <edge id="41501" label="0000110001 (1) 0000010001" source="38571" target="38524" cy:directed="1"/>
      <edge id="41500" label="0000110001 (1) 0001110001" source="38571" target="38518" cy:directed="1"/>
      <edge id="41499" label="0000110001 (1) 0010110001" source="38571" target="38541" cy:directed="1"/>
      <edge id="41498" label="0001100001 (1) 0001100101" source="38570" target="38519" cy:directed="1"/>
      <edge id="41497" label="0001100001 (1) 0001110001" source="38570" target="38518" cy:directed="1"/>
      <edge id="41496" label="0001100001 (1) 0001000001" source="38570" target="38688" cy:directed="1"/>
      <edge id="41495" label="0001100001 (1) 0011100001" source="38570" target="38517" cy:directed="1"/>
      <edge id="41494" label="0010100001 (1) 0010100101" source="38569" target="38542" cy:directed="1"/>
      <edge id="41493" label="0010100001 (1) 0010110001" source="38569" target="38541" cy:directed="1"/>
      <edge id="41492" label="0010100001 (1) 0010000001" source="38569" target="38648" cy:directed="1"/>
      <edge id="41491" label="1000100001 (1) 1000100101" source="38568" target="38567" cy:directed="1"/>
      <edge id="41490" label="1000100001 (1) 1000110001" source="38568" target="38566" cy:directed="1"/>
      <edge id="41489" label="1000100001 (1) 1000000001" source="38568" target="38687" cy:directed="1"/>
      <edge id="41488" label="1000100001 (1) 1001100001" source="38568" target="38565" cy:directed="1"/>
      <edge id="41487" label="1000100001 (1) 1010100001" source="38568" target="38564" cy:directed="1"/>
      <edge id="41486" label="1000100001 (1) 1100100001" source="38568" target="38563" cy:directed="1"/>
      <edge id="41485" label="1000100101 (1) 1000110101" source="38567" target="38376" cy:directed="1"/>
      <edge id="41484" label="1000100101 (1) 1001100101" source="38567" target="38516" cy:directed="1"/>
      <edge id="41483" label="1000100101 (1) 1010100101" source="38567" target="38540" cy:directed="1"/>
      <edge id="41482" label="1000100101 (1) 1100100101" source="38567" target="38559" cy:directed="1"/>
      <edge id="41481" label="1000110001 (1) 1000110101" source="38566" target="38376" cy:directed="1"/>
      <edge id="41480" label="1000110001 (1) 1000111001" source="38566" target="38375" cy:directed="1"/>
      <edge id="41479" label="1000110001 (1) 1000010001" source="38566" target="38529" cy:directed="1"/>
      <edge id="41478" label="1000110001 (1) 1001110001" source="38566" target="38515" cy:directed="1"/>
      <edge id="41477" label="1000110001 (1) 1010110001" source="38566" target="38539" cy:directed="1"/>
      <edge id="41476" label="1001100001 (1) 1001100101" source="38565" target="38516" cy:directed="1"/>
      <edge id="41475" label="1001100001 (1) 1001110001" source="38565" target="38515" cy:directed="1"/>
      <edge id="41474" label="1001100001 (1) 1001000001" source="38565" target="38684" cy:directed="1"/>
      <edge id="41473" label="1001100001 (1) 1011100001" source="38565" target="38514" cy:directed="1"/>
      <edge id="41472" label="1001100001 (1) 1101100001" source="38565" target="38603" cy:directed="1"/>
      <edge id="41471" label="1010100001 (1) 1010100101" source="38564" target="38540" cy:directed="1"/>
      <edge id="41470" label="1010100001 (1) 1010110001" source="38564" target="38539" cy:directed="1"/>
      <edge id="41469" label="1010100001 (1) 1010000001" source="38564" target="38652" cy:directed="1"/>
      <edge id="41468" label="1010100001 (1) 1110100001" source="38564" target="38538" cy:directed="1"/>
      <edge id="41467" label="1100100001 (1) 1100100101" source="38563" target="38559" cy:directed="1"/>
      <edge id="41466" label="1100100001 (1) 1100110001" source="38563" target="38558" cy:directed="1"/>
      <edge id="41465" label="1100100001 (1) 1100000001" source="38563" target="38683" cy:directed="1"/>
      <edge id="41464" label="1100100001 (1) 1101100001" source="38563" target="38603" cy:directed="1"/>
      <edge id="41463" label="1011001110 (1) 1011001010" source="38562" target="38852" cy:directed="1"/>
      <edge id="41462" label="1011001110 (1) 1011000110" source="38562" target="38787" cy:directed="1"/>
      <edge id="41461" label="1011001110 (1) 1010001110" source="38562" target="38623" cy:directed="1"/>
      <edge id="41460" label="1011001110 (1) 1111001110" source="38562" target="38554" cy:directed="1"/>
      <edge id="41459" label="1111001100 (1) 1111001110" source="38561" target="38554" cy:directed="1"/>
      <edge id="41458" label="1111001100 (1) 1111001000" source="38561" target="38851" cy:directed="1"/>
      <edge id="41457" label="1111001100 (1) 1111000100" source="38561" target="38785" cy:directed="1"/>
      <edge id="41456" label="1111001100 (1) 1111101100" source="38561" target="38553" cy:directed="1"/>
      <edge id="41455" label="1111001100 (1) 1110001100" source="38561" target="38622" cy:directed="1"/>
      <edge id="41454" label="1111001100 (1) 1101001100" source="38561" target="38643" cy:directed="1"/>
      <edge id="41453" label="0011001110 (1) 0011001010" source="38560" target="38844" cy:directed="1"/>
      <edge id="41452" label="0011001110 (1) 0011000110" source="38560" target="38782" cy:directed="1"/>
      <edge id="41451" label="0011001110 (1) 0010001110" source="38560" target="38621" cy:directed="1"/>
      <edge id="41450" label="1100100101 (1) 1100110101" source="38559" target="38365" cy:directed="1"/>
      <edge id="41449" label="1100100101 (1) 1101100101" source="38559" target="38513" cy:directed="1"/>
      <edge id="41448" label="1100110001 (1) 1100110101" source="38558" target="38365" cy:directed="1"/>
      <edge id="41447" label="1100110001 (1) 1100111001" source="38558" target="38364" cy:directed="1"/>
      <edge id="41446" label="1100110001 (1) 1100010001" source="38558" target="38511" cy:directed="1"/>
      <edge id="41445" label="1100110001 (1) 1101110001" source="38558" target="38512" cy:directed="1"/>
      <edge id="41444" label="1100110001 (1) 1000110001" source="38558" target="38566" cy:directed="1"/>
      <edge id="41443" label="0100100001 (1) 0100100101" source="38557" target="38556" cy:directed="1"/>
      <edge id="41442" label="0100100001 (1) 0100110001" source="38557" target="38555" cy:directed="1"/>
      <edge id="41441" label="0100100001 (1) 0100000001" source="38557" target="38677" cy:directed="1"/>
      <edge id="41440" label="0100100001 (1) 0101100001" source="38557" target="38600" cy:directed="1"/>
      <edge id="41439" label="0100100001 (1) 0000100001" source="38557" target="38573" cy:directed="1"/>
      <edge id="41438" label="0100100101 (1) 0100110101" source="38556" target="38363" cy:directed="1"/>
      <edge id="41437" label="0100100101 (1) 0101100101" source="38556" target="38506" cy:directed="1"/>
      <edge id="41436" label="0100100101 (1) 0000100101" source="38556" target="38572" cy:directed="1"/>
      <edge id="41435" label="0100110001 (1) 0100110101" source="38555" target="38363" cy:directed="1"/>
      <edge id="41434" label="0100110001 (1) 0100111001" source="38555" target="38362" cy:directed="1"/>
      <edge id="41433" label="0100110001 (1) 0100010001" source="38555" target="38504" cy:directed="1"/>
      <edge id="41432" label="0100110001 (1) 0101110001" source="38555" target="38505" cy:directed="1"/>
      <edge id="41431" label="0100110001 (1) 0000110001" source="38555" target="38571" cy:directed="1"/>
      <edge id="41430" label="1111001110 (1) 1111001010" source="38554" target="38839" cy:directed="1"/>
      <edge id="41429" label="1111001110 (1) 1111000110" source="38554" target="38778" cy:directed="1"/>
      <edge id="41428" label="1111001110 (1) 1111101110" source="38554" target="38153" cy:directed="1"/>
      <edge id="41427" label="1111001110 (1) 1110001110" source="38554" target="38609" cy:directed="1"/>
      <edge id="41426" label="1111001110 (1) 1101001110" source="38554" target="38584" cy:directed="1"/>
      <edge id="41425" label="1111101100 (1) 1111101000" source="38553" target="38838" cy:directed="1"/>
      <edge id="41424" label="1111101100 (1) 1111100100" source="38553" target="38777" cy:directed="1"/>
      <edge id="41423" label="1111101100 (1) 1111111100" source="38553" target="38607" cy:directed="1"/>
      <edge id="41422" label="1111101100 (1) 1110101100" source="38553" target="38531" cy:directed="1"/>
      <edge id="41421" label="1111101100 (1) 1101101100" source="38553" target="38583" cy:directed="1"/>
      <edge id="41420" label="0111001100 (1) 0111001110" source="38552" target="38551" cy:directed="1"/>
      <edge id="41419" label="0111001100 (1) 0111001000" source="38552" target="38832" cy:directed="1"/>
      <edge id="41418" label="0111001100 (1) 0111000100" source="38552" target="38776" cy:directed="1"/>
      <edge id="41417" label="0111001100 (1) 0111101100" source="38552" target="38550" cy:directed="1"/>
      <edge id="41416" label="0111001100 (1) 0110001100" source="38552" target="38611" cy:directed="1"/>
      <edge id="41415" label="0111001100 (1) 0101001100" source="38552" target="38639" cy:directed="1"/>
      <edge id="41414" label="0111001100 (1) 0011001100" source="38552" target="38590" cy:directed="1"/>
      <edge id="41413" label="0111001110 (1) 0111001010" source="38551" target="38831" cy:directed="1"/>
      <edge id="41412" label="0111001110 (1) 0111000110" source="38551" target="38775" cy:directed="1"/>
      <edge id="41411" label="0111001110 (1) 0111101110" source="38551" target="38152" cy:directed="1"/>
      <edge id="41410" label="0111001110 (1) 0110001110" source="38551" target="38610" cy:directed="1"/>
      <edge id="41409" label="0111001110 (1) 0101001110" source="38551" target="38582" cy:directed="1"/>
      <edge id="41408" label="0111001110 (1) 0011001110" source="38551" target="38560" cy:directed="1"/>
      <edge id="41407" label="0111101100 (1) 0111101000" source="38550" target="38830" cy:directed="1"/>
      <edge id="41406" label="0111101100 (1) 0111100100" source="38550" target="38774" cy:directed="1"/>
      <edge id="41405" label="0111101100 (1) 0111111100" source="38550" target="38606" cy:directed="1"/>
      <edge id="41404" label="0111101100 (1) 0110101100" source="38550" target="38530" cy:directed="1"/>
      <edge id="41403" label="0111101100 (1) 0101101100" source="38550" target="38581" cy:directed="1"/>
      <edge id="41402" label="0111101100 (1) 0011101100" source="38550" target="38487" cy:directed="1"/>
      <edge id="41401" label="0000101100 (1) 0000101000" source="38549" target="38827" cy:directed="1"/>
      <edge id="41400" label="0000101100 (1) 0000100100" source="38549" target="38848" cy:directed="1"/>
      <edge id="41399" label="0000101100 (1) 0000111100" source="38549" target="38720" cy:directed="1"/>
      <edge id="41398" label="0000101100 (1) 0000001100" source="38549" target="38658" cy:directed="1"/>
      <edge id="41397" label="0000101100 (1) 0001101100" source="38549" target="38548" cy:directed="1"/>
      <edge id="41396" label="0000101100 (1) 0010101100" source="38549" target="38547" cy:directed="1"/>
      <edge id="41395" label="0001101100 (1) 0001101000" source="38548" target="38826" cy:directed="1"/>
      <edge id="41394" label="0001101100 (1) 0001100100" source="38548" target="38799" cy:directed="1"/>
      <edge id="41393" label="0001101100 (1) 0001111100" source="38548" target="38642" cy:directed="1"/>
      <edge id="41392" label="0001101100 (1) 0001001100" source="38548" target="38656" cy:directed="1"/>
      <edge id="41391" label="0001101100 (1) 0011101100" source="38548" target="38487" cy:directed="1"/>
      <edge id="41390" label="0010101100 (1) 0010101000" source="38547" target="38825" cy:directed="1"/>
      <edge id="41389" label="0010101100 (1) 0010100100" source="38547" target="38816" cy:directed="1"/>
      <edge id="41388" label="0010101100 (1) 0010111100" source="38547" target="38694" cy:directed="1"/>
      <edge id="41387" label="0010101100 (1) 0010001100" source="38547" target="38655" cy:directed="1"/>
      <edge id="41386" label="1000101100 (1) 1000101000" source="38546" target="38824" cy:directed="1"/>
      <edge id="41385" label="1000101100 (1) 1000100100" source="38546" target="38857" cy:directed="1"/>
      <edge id="41384" label="1000101100 (1) 1000111100" source="38546" target="38721" cy:directed="1"/>
      <edge id="41383" label="1000101100 (1) 1000001100" source="38546" target="38663" cy:directed="1"/>
      <edge id="41382" label="1000101100 (1) 1001101100" source="38546" target="38545" cy:directed="1"/>
      <edge id="41381" label="1000101100 (1) 1010101100" source="38546" target="38544" cy:directed="1"/>
      <edge id="41380" label="1000101100 (1) 1100101100" source="38546" target="38543" cy:directed="1"/>
      <edge id="41379" label="1001101100 (1) 1001101000" source="38545" target="38823" cy:directed="1"/>
      <edge id="41378" label="1001101100 (1) 1001100100" source="38545" target="38802" cy:directed="1"/>
      <edge id="41377" label="1001101100 (1) 1001111100" source="38545" target="38645" cy:directed="1"/>
      <edge id="41376" label="1001101100 (1) 1001001100" source="38545" target="38661" cy:directed="1"/>
      <edge id="41375" label="1001101100 (1) 1011101100" source="38545" target="38486" cy:directed="1"/>
      <edge id="41374" label="1001101100 (1) 1101101100" source="38545" target="38583" cy:directed="1"/>
      <edge id="41373" label="1010101100 (1) 1010101000" source="38544" target="38822" cy:directed="1"/>
      <edge id="41372" label="1010101100 (1) 1010100100" source="38544" target="38819" cy:directed="1"/>
      <edge id="41371" label="1010101100 (1) 1010111100" source="38544" target="38696" cy:directed="1"/>
      <edge id="41370" label="1010101100 (1) 1010001100" source="38544" target="38660" cy:directed="1"/>
      <edge id="41369" label="1010101100 (1) 1110101100" source="38544" target="38531" cy:directed="1"/>
      <edge id="41368" label="1100101100 (1) 1100101000" source="38543" target="38821" cy:directed="1"/>
      <edge id="41367" label="1100101100 (1) 1100100100" source="38543" target="38841" cy:directed="1"/>
      <edge id="41366" label="1100101100 (1) 1100111100" source="38543" target="38718" cy:directed="1"/>
      <edge id="41365" label="1100101100 (1) 1100001100" source="38543" target="38659" cy:directed="1"/>
      <edge id="41364" label="1100101100 (1) 1101101100" source="38543" target="38583" cy:directed="1"/>
      <edge id="41363" label="0010100101 (1) 0010110101" source="38542" target="38348" cy:directed="1"/>
      <edge id="41362" label="0010110001 (1) 0010110101" source="38541" target="38348" cy:directed="1"/>
      <edge id="41361" label="0010110001 (1) 0010111001" source="38541" target="38347" cy:directed="1"/>
      <edge id="41360" label="0010110001 (1) 0010010001" source="38541" target="38491" cy:directed="1"/>
      <edge id="41359" label="1010100101 (1) 1010110101" source="38540" target="38354" cy:directed="1"/>
      <edge id="41358" label="1010100101 (1) 1110100101" source="38540" target="38536" cy:directed="1"/>
      <edge id="41357" label="1010110001 (1) 1010110101" source="38539" target="38354" cy:directed="1"/>
      <edge id="41356" label="1010110001 (1) 1010111001" source="38539" target="38353" cy:directed="1"/>
      <edge id="41355" label="1010110001 (1) 1010010001" source="38539" target="38485" cy:directed="1"/>
      <edge id="41354" label="1110100001 (1) 1110100101" source="38538" target="38536" cy:directed="1"/>
      <edge id="41353" label="1110100001 (1) 1110110001" source="38538" target="38535" cy:directed="1"/>
      <edge id="41352" label="1110100001 (1) 1110000001" source="38538" target="38649" cy:directed="1"/>
      <edge id="41351" label="1110100001 (1) 1100100001" source="38538" target="38563" cy:directed="1"/>
      <edge id="41350" label="0100101100 (1) 0100101000" source="38537" target="38815" cy:directed="1"/>
      <edge id="41349" label="0100101100 (1) 0100100100" source="38537" target="38834" cy:directed="1"/>
      <edge id="41348" label="0100101100 (1) 0100111100" source="38537" target="38714" cy:directed="1"/>
      <edge id="41347" label="0100101100 (1) 0100001100" source="38537" target="38641" cy:directed="1"/>
      <edge id="41346" label="0100101100 (1) 0101101100" source="38537" target="38581" cy:directed="1"/>
      <edge id="41345" label="0100101100 (1) 0000101100" source="38537" target="38549" cy:directed="1"/>
      <edge id="41344" label="1110100101 (1) 1110110101" source="38536" target="38338" cy:directed="1"/>
      <edge id="41343" label="1110100101 (1) 1100100101" source="38536" target="38559" cy:directed="1"/>
      <edge id="41342" label="1110110001 (1) 1110110101" source="38535" target="38338" cy:directed="1"/>
      <edge id="41341" label="1110110001 (1) 1110111001" source="38535" target="38337" cy:directed="1"/>
      <edge id="41340" label="1110110001 (1) 1110010001" source="38535" target="38477" cy:directed="1"/>
      <edge id="41339" label="1110110001 (1) 1100110001" source="38535" target="38558" cy:directed="1"/>
      <edge id="41338" label="1110110001 (1) 1010110001" source="38535" target="38539" cy:directed="1"/>
      <edge id="41337" label="0110100001 (1) 0110100101" source="38534" target="38533" cy:directed="1"/>
      <edge id="41336" label="0110100001 (1) 0110110001" source="38534" target="38532" cy:directed="1"/>
      <edge id="41335" label="0110100001 (1) 0110000001" source="38534" target="38636" cy:directed="1"/>
      <edge id="41334" label="0110100001 (1) 0100100001" source="38534" target="38557" cy:directed="1"/>
      <edge id="41333" label="0110100001 (1) 0010100001" source="38534" target="38569" cy:directed="1"/>
      <edge id="41332" label="0110100101 (1) 0110110101" source="38533" target="38333" cy:directed="1"/>
      <edge id="41331" label="0110100101 (1) 0100100101" source="38533" target="38556" cy:directed="1"/>
      <edge id="41330" label="0110100101 (1) 0010100101" source="38533" target="38542" cy:directed="1"/>
      <edge id="41329" label="0110110001 (1) 0110110101" source="38532" target="38333" cy:directed="1"/>
      <edge id="41328" label="0110110001 (1) 0110111001" source="38532" target="38332" cy:directed="1"/>
      <edge id="41327" label="0110110001 (1) 0110010001" source="38532" target="38471" cy:directed="1"/>
      <edge id="41326" label="0110110001 (1) 0100110001" source="38532" target="38555" cy:directed="1"/>
      <edge id="41325" label="0110110001 (1) 0010110001" source="38532" target="38541" cy:directed="1"/>
      <edge id="41324" label="1110101100 (1) 1110101000" source="38531" target="38805" cy:directed="1"/>
      <edge id="41323" label="1110101100 (1) 1110100100" source="38531" target="38812" cy:directed="1"/>
      <edge id="41322" label="1110101100 (1) 1110111100" source="38531" target="38682" cy:directed="1"/>
      <edge id="41321" label="1110101100 (1) 1110001100" source="38531" target="38622" cy:directed="1"/>
      <edge id="41320" label="1110101100 (1) 1100101100" source="38531" target="38543" cy:directed="1"/>
      <edge id="41319" label="0110101100 (1) 0110101000" source="38530" target="38804" cy:directed="1"/>
      <edge id="41318" label="0110101100 (1) 0110100100" source="38530" target="38808" cy:directed="1"/>
      <edge id="41317" label="0110101100 (1) 0110111100" source="38530" target="38681" cy:directed="1"/>
      <edge id="41316" label="0110101100 (1) 0110001100" source="38530" target="38611" cy:directed="1"/>
      <edge id="41315" label="0110101100 (1) 0100101100" source="38530" target="38537" cy:directed="1"/>
      <edge id="41314" label="0110101100 (1) 0010101100" source="38530" target="38547" cy:directed="1"/>
      <edge id="41313" label="1000010001 (1) 1000010011" source="38529" target="38528" cy:directed="1"/>
      <edge id="41312" label="1000010001 (1) 1000010101" source="38529" target="38527" cy:directed="1"/>
      <edge id="41311" label="1000010001 (1) 1000011001" source="38529" target="38526" cy:directed="1"/>
      <edge id="41310" label="1000010001 (1) 1000000001" source="38529" target="38687" cy:directed="1"/>
      <edge id="41309" label="1000010001 (1) 1001010001" source="38529" target="38525" cy:directed="1"/>
      <edge id="41308" label="1000010011 (1) 1000010111" source="38528" target="38190" cy:directed="1"/>
      <edge id="41307" label="1000010011 (1) 1000000011" source="38528" target="38686" cy:directed="1"/>
      <edge id="41306" label="1000010011 (1) 1001010011" source="38528" target="38457" cy:directed="1"/>
      <edge id="41305" label="1000010101 (1) 1000010111" source="38527" target="38190" cy:directed="1"/>
      <edge id="41304" label="1000010101 (1) 1000011101" source="38527" target="38248" cy:directed="1"/>
      <edge id="41303" label="1000010101 (1) 1000000101" source="38527" target="38685" cy:directed="1"/>
      <edge id="41302" label="1000010101 (1) 1000110101" source="38527" target="38376" cy:directed="1"/>
      <edge id="41301" label="1000010101 (1) 1001010101" source="38527" target="38456" cy:directed="1"/>
      <edge id="41300" label="1000010101 (1) 1010010101" source="38527" target="38483" cy:directed="1"/>
      <edge id="41299" label="1000011001 (1) 1000011011" source="38526" target="38249" cy:directed="1"/>
      <edge id="41298" label="1000011001 (1) 1000011101" source="38526" target="38248" cy:directed="1"/>
      <edge id="41297" label="1000011001 (1) 1000001001" source="38526" target="38431" cy:directed="1"/>
      <edge id="41296" label="1000011001 (1) 1001011001" source="38526" target="38455" cy:directed="1"/>
      <edge id="41295" label="1001010001 (1) 1001010011" source="38525" target="38457" cy:directed="1"/>
      <edge id="41294" label="1001010001 (1) 1001010101" source="38525" target="38456" cy:directed="1"/>
      <edge id="41293" label="1001010001 (1) 1001011001" source="38525" target="38455" cy:directed="1"/>
      <edge id="41292" label="1001010001 (1) 1001000001" source="38525" target="38684" cy:directed="1"/>
      <edge id="41291" label="0000010001 (1) 0000010011" source="38524" target="38523" cy:directed="1"/>
      <edge id="41290" label="0000010001 (1) 0000010101" source="38524" target="38522" cy:directed="1"/>
      <edge id="41289" label="0000010001 (1) 0000011001" source="38524" target="38521" cy:directed="1"/>
      <edge id="41288" label="0000010001 (1) 0000000001" source="38524" target="38691" cy:directed="1"/>
      <edge id="41287" label="0000010001 (1) 0001010001" source="38524" target="38520" cy:directed="1"/>
      <edge id="41286" label="0000010011 (1) 0000010111" source="38523" target="38196" cy:directed="1"/>
      <edge id="41285" label="0000010011 (1) 0000000011" source="38523" target="38690" cy:directed="1"/>
      <edge id="41284" label="0000010011 (1) 0001010011" source="38523" target="38454" cy:directed="1"/>
      <edge id="41283" label="0000010101 (1) 0000010111" source="38522" target="38196" cy:directed="1"/>
      <edge id="41282" label="0000010101 (1) 0000011101" source="38522" target="38246" cy:directed="1"/>
      <edge id="41281" label="0000010101 (1) 0000000101" source="38522" target="38689" cy:directed="1"/>
      <edge id="41280" label="0000010101 (1) 0000110101" source="38522" target="38371" cy:directed="1"/>
      <edge id="41279" label="0000010101 (1) 0001010101" source="38522" target="38453" cy:directed="1"/>
      <edge id="41278" label="0000010101 (1) 0010010101" source="38522" target="38489" cy:directed="1"/>
      <edge id="41277" label="0000011001 (1) 0000011011" source="38521" target="38247" cy:directed="1"/>
      <edge id="41276" label="0000011001 (1) 0000011101" source="38521" target="38246" cy:directed="1"/>
      <edge id="41275" label="0000011001 (1) 0000001001" source="38521" target="38426" cy:directed="1"/>
      <edge id="41274" label="0000011001 (1) 0001011001" source="38521" target="38452" cy:directed="1"/>
      <edge id="41273" label="0001010001 (1) 0001010011" source="38520" target="38454" cy:directed="1"/>
      <edge id="41272" label="0001010001 (1) 0001010101" source="38520" target="38453" cy:directed="1"/>
      <edge id="41271" label="0001010001 (1) 0001011001" source="38520" target="38452" cy:directed="1"/>
      <edge id="41270" label="0001010001 (1) 0001000001" source="38520" target="38688" cy:directed="1"/>
      <edge id="41269" label="0001100101 (1) 0001110101" source="38519" target="38307" cy:directed="1"/>
      <edge id="41268" label="0001100101 (1) 0011100101" source="38519" target="38496" cy:directed="1"/>
      <edge id="41267" label="0001110001 (1) 0001110101" source="38518" target="38307" cy:directed="1"/>
      <edge id="41266" label="0001110001 (1) 0001111001" source="38518" target="38306" cy:directed="1"/>
      <edge id="41265" label="0001110001 (1) 0001010001" source="38518" target="38520" cy:directed="1"/>
      <edge id="41264" label="0001110001 (1) 0011110001" source="38518" target="38495" cy:directed="1"/>
      <edge id="41263" label="0011100001 (1) 0011100101" source="38517" target="38496" cy:directed="1"/>
      <edge id="41262" label="0011100001 (1) 0011110001" source="38517" target="38495" cy:directed="1"/>
      <edge id="41261" label="0011100001 (1) 0011000001" source="38517" target="38594" cy:directed="1"/>
      <edge id="41260" label="0011100001 (1) 0010100001" source="38517" target="38569" cy:directed="1"/>
      <edge id="41259" label="1001100101 (1) 1001110101" source="38516" target="38313" cy:directed="1"/>
      <edge id="41258" label="1001100101 (1) 1011100101" source="38516" target="38494" cy:directed="1"/>
      <edge id="41257" label="1001100101 (1) 1101100101" source="38516" target="38513" cy:directed="1"/>
      <edge id="41256" label="1001110001 (1) 1001110101" source="38515" target="38313" cy:directed="1"/>
      <edge id="41255" label="1001110001 (1) 1001111001" source="38515" target="38312" cy:directed="1"/>
      <edge id="41254" label="1001110001 (1) 1001010001" source="38515" target="38525" cy:directed="1"/>
      <edge id="41253" label="1001110001 (1) 1011110001" source="38515" target="38493" cy:directed="1"/>
      <edge id="41252" label="1011100001 (1) 1011100101" source="38514" target="38494" cy:directed="1"/>
      <edge id="41251" label="1011100001 (1) 1011110001" source="38514" target="38493" cy:directed="1"/>
      <edge id="41250" label="1011100001 (1) 1011000001" source="38514" target="38588" cy:directed="1"/>
      <edge id="41249" label="1011100001 (1) 1010100001" source="38514" target="38564" cy:directed="1"/>
      <edge id="41248" label="1011100001 (1) 1111100001" source="38514" target="38578" cy:directed="1"/>
      <edge id="41247" label="1101100101 (1) 1101110101" source="38513" target="38301" cy:directed="1"/>
      <edge id="41246" label="1101110001 (1) 1101110101" source="38512" target="38301" cy:directed="1"/>
      <edge id="41245" label="1101110001 (1) 1101111001" source="38512" target="38300" cy:directed="1"/>
      <edge id="41244" label="1101110001 (1) 1001110001" source="38512" target="38515" cy:directed="1"/>
      <edge id="41243" label="1100010001 (1) 1100010011" source="38511" target="38510" cy:directed="1"/>
      <edge id="41242" label="1100010001 (1) 1100010101" source="38511" target="38509" cy:directed="1"/>
      <edge id="41241" label="1100010001 (1) 1100011001" source="38511" target="38508" cy:directed="1"/>
      <edge id="41240" label="1100010001 (1) 1100000001" source="38511" target="38683" cy:directed="1"/>
      <edge id="41239" label="1100010001 (1) 1101010001" source="38511" target="38507" cy:directed="1"/>
      <edge id="41238" label="1100010001 (1) 1000010001" source="38511" target="38529" cy:directed="1"/>
      <edge id="41237" label="1100010011 (1) 1100010111" source="38510" target="38189" cy:directed="1"/>
      <edge id="41236" label="1100010011 (1) 1100000011" source="38510" target="38680" cy:directed="1"/>
      <edge id="41235" label="1100010011 (1) 1101010011" source="38510" target="38442" cy:directed="1"/>
      <edge id="41234" label="1100010011 (1) 1000010011" source="38510" target="38528" cy:directed="1"/>
      <edge id="41233" label="1100010101 (1) 1100010111" source="38509" target="38189" cy:directed="1"/>
      <edge id="41232" label="1100010101 (1) 1100011101" source="38509" target="38233" cy:directed="1"/>
      <edge id="41231" label="1100010101 (1) 1100000101" source="38509" target="38679" cy:directed="1"/>
      <edge id="41230" label="1100010101 (1) 1100110101" source="38509" target="38365" cy:directed="1"/>
      <edge id="41229" label="1100010101 (1) 1101010101" source="38509" target="38441" cy:directed="1"/>
      <edge id="41228" label="1100010101 (1) 1000010101" source="38509" target="38527" cy:directed="1"/>
      <edge id="41227" label="1100011001 (1) 1100011011" source="38508" target="38234" cy:directed="1"/>
      <edge id="41226" label="1100011001 (1) 1100011101" source="38508" target="38233" cy:directed="1"/>
      <edge id="41225" label="1100011001 (1) 1100001001" source="38508" target="38427" cy:directed="1"/>
      <edge id="41224" label="1100011001 (1) 1101011001" source="38508" target="38440" cy:directed="1"/>
      <edge id="41223" label="1100011001 (1) 1000011001" source="38508" target="38526" cy:directed="1"/>
      <edge id="41222" label="1101010001 (1) 1101010011" source="38507" target="38442" cy:directed="1"/>
      <edge id="41221" label="1101010001 (1) 1101010101" source="38507" target="38441" cy:directed="1"/>
      <edge id="41220" label="1101010001 (1) 1101011001" source="38507" target="38440" cy:directed="1"/>
      <edge id="41219" label="1101010001 (1) 1101000001" source="38507" target="38678" cy:directed="1"/>
      <edge id="41218" label="1101010001 (1) 1101110001" source="38507" target="38512" cy:directed="1"/>
      <edge id="41217" label="1101010001 (1) 1001010001" source="38507" target="38525" cy:directed="1"/>
      <edge id="41216" label="0101100101 (1) 0101110101" source="38506" target="38299" cy:directed="1"/>
      <edge id="41215" label="0101100101 (1) 0001100101" source="38506" target="38519" cy:directed="1"/>
      <edge id="41214" label="0101110001 (1) 0101110101" source="38505" target="38299" cy:directed="1"/>
      <edge id="41213" label="0101110001 (1) 0101111001" source="38505" target="38298" cy:directed="1"/>
      <edge id="41212" label="0101110001 (1) 0001110001" source="38505" target="38518" cy:directed="1"/>
      <edge id="41211" label="0100010001 (1) 0100010011" source="38504" target="38503" cy:directed="1"/>
      <edge id="41210" label="0100010001 (1) 0100010101" source="38504" target="38502" cy:directed="1"/>
      <edge id="41209" label="0100010001 (1) 0100011001" source="38504" target="38501" cy:directed="1"/>
      <edge id="41208" label="0100010001 (1) 0100000001" source="38504" target="38677" cy:directed="1"/>
      <edge id="41207" label="0100010001 (1) 0101010001" source="38504" target="38500" cy:directed="1"/>
      <edge id="41206" label="0100010001 (1) 0000010001" source="38504" target="38524" cy:directed="1"/>
      <edge id="41205" label="0100010011 (1) 0100010111" source="38503" target="38188" cy:directed="1"/>
      <edge id="41204" label="0100010011 (1) 0100000011" source="38503" target="38676" cy:directed="1"/>
      <edge id="41203" label="0100010011 (1) 0101010011" source="38503" target="38439" cy:directed="1"/>
      <edge id="41202" label="0100010011 (1) 0000010011" source="38503" target="38523" cy:directed="1"/>
      <edge id="41201" label="0100010101 (1) 0100010111" source="38502" target="38188" cy:directed="1"/>
      <edge id="41200" label="0100010101 (1) 0100011101" source="38502" target="38235" cy:directed="1"/>
      <edge id="41199" label="0100010101 (1) 0100000101" source="38502" target="38675" cy:directed="1"/>
      <edge id="41198" label="0100010101 (1) 0100110101" source="38502" target="38363" cy:directed="1"/>
      <edge id="41197" label="0100010101 (1) 0101010101" source="38502" target="38438" cy:directed="1"/>
      <edge id="41196" label="0100010101 (1) 0000010101" source="38502" target="38522" cy:directed="1"/>
      <edge id="41195" label="0100011001 (1) 0100011011" source="38501" target="38236" cy:directed="1"/>
      <edge id="41194" label="0100011001 (1) 0100011101" source="38501" target="38235" cy:directed="1"/>
      <edge id="41193" label="0100011001 (1) 0100001001" source="38501" target="38417" cy:directed="1"/>
      <edge id="41192" label="0100011001 (1) 0101011001" source="38501" target="38437" cy:directed="1"/>
      <edge id="41191" label="0100011001 (1) 0000011001" source="38501" target="38521" cy:directed="1"/>
      <edge id="41190" label="0101010001 (1) 0101010011" source="38500" target="38439" cy:directed="1"/>
      <edge id="41189" label="0101010001 (1) 0101010101" source="38500" target="38438" cy:directed="1"/>
      <edge id="41188" label="0101010001 (1) 0101011001" source="38500" target="38437" cy:directed="1"/>
      <edge id="41187" label="0101010001 (1) 0101000001" source="38500" target="38674" cy:directed="1"/>
      <edge id="41186" label="0101010001 (1) 0101110001" source="38500" target="38505" cy:directed="1"/>
      <edge id="41185" label="0101010001 (1) 0001010001" source="38500" target="38520" cy:directed="1"/>
      <edge id="41184" label="1101101010 (1) 1101101000" source="38499" target="38863" cy:directed="1"/>
      <edge id="41183" label="1101101010 (1) 1101100010" source="38499" target="38749" cy:directed="1"/>
      <edge id="41182" label="1101101010 (1) 1101111010" source="38499" target="38355" cy:directed="1"/>
      <edge id="41181" label="1000011110 (1) 1000010110" source="38498" target="38736" cy:directed="1"/>
      <edge id="41180" label="1000011110 (1) 1000001110" source="38498" target="38662" cy:directed="1"/>
      <edge id="41179" label="1000011110 (1) 1001011110" source="38498" target="38413" cy:directed="1"/>
      <edge id="41178" label="1000011110 (1) 1010011110" source="38498" target="38465" cy:directed="1"/>
      <edge id="41177" label="0000011110 (1) 0000010110" source="38497" target="38740" cy:directed="1"/>
      <edge id="41176" label="0000011110 (1) 0000001110" source="38497" target="38657" cy:directed="1"/>
      <edge id="41175" label="0000011110 (1) 0001011110" source="38497" target="38412" cy:directed="1"/>
      <edge id="41174" label="0000011110 (1) 0010011110" source="38497" target="38462" cy:directed="1"/>
      <edge id="41173" label="0011100101 (1) 0011110101" source="38496" target="38276" cy:directed="1"/>
      <edge id="41172" label="0011100101 (1) 0010100101" source="38496" target="38542" cy:directed="1"/>
      <edge id="41171" label="0011110001 (1) 0011110101" source="38495" target="38276" cy:directed="1"/>
      <edge id="41170" label="0011110001 (1) 0011111001" source="38495" target="38275" cy:directed="1"/>
      <edge id="41169" label="0011110001 (1) 0011010001" source="38495" target="38407" cy:directed="1"/>
      <edge id="41168" label="0011110001 (1) 0010110001" source="38495" target="38541" cy:directed="1"/>
      <edge id="41167" label="1011100101 (1) 1011110101" source="38494" target="38278" cy:directed="1"/>
      <edge id="41166" label="1011100101 (1) 1010100101" source="38494" target="38540" cy:directed="1"/>
      <edge id="41165" label="1011100101 (1) 1111100101" source="38494" target="38479" cy:directed="1"/>
      <edge id="41164" label="1011110001 (1) 1011110101" source="38493" target="38278" cy:directed="1"/>
      <edge id="41163" label="1011110001 (1) 1011111001" source="38493" target="38277" cy:directed="1"/>
      <edge id="41162" label="1011110001 (1) 1011010001" source="38493" target="38411" cy:directed="1"/>
      <edge id="41161" label="1011110001 (1) 1010110001" source="38493" target="38539" cy:directed="1"/>
      <edge id="41160" label="0101101010 (1) 0101101000" source="38492" target="38860" cy:directed="1"/>
      <edge id="41159" label="0101101010 (1) 0101100010" source="38492" target="38745" cy:directed="1"/>
      <edge id="41158" label="0101101010 (1) 0101111010" source="38492" target="38346" cy:directed="1"/>
      <edge id="41157" label="0101101010 (1) 0001101010" source="38492" target="38449" cy:directed="1"/>
      <edge id="41156" label="0010010001 (1) 0010010011" source="38491" target="38490" cy:directed="1"/>
      <edge id="41155" label="0010010001 (1) 0010010101" source="38491" target="38489" cy:directed="1"/>
      <edge id="41154" label="0010010001 (1) 0010011001" source="38491" target="38488" cy:directed="1"/>
      <edge id="41153" label="0010010001 (1) 0010000001" source="38491" target="38648" cy:directed="1"/>
      <edge id="41152" label="0010010001 (1) 0000010001" source="38491" target="38524" cy:directed="1"/>
      <edge id="41151" label="0010010011 (1) 0010010111" source="38490" target="38179" cy:directed="1"/>
      <edge id="41150" label="0010010011 (1) 0010000011" source="38490" target="38647" cy:directed="1"/>
      <edge id="41149" label="0010010011 (1) 0000010011" source="38490" target="38523" cy:directed="1"/>
      <edge id="41148" label="0010010101 (1) 0010010111" source="38489" target="38179" cy:directed="1"/>
      <edge id="41147" label="0010010101 (1) 0010011101" source="38489" target="38226" cy:directed="1"/>
      <edge id="41146" label="0010010101 (1) 0010000101" source="38489" target="38646" cy:directed="1"/>
      <edge id="41145" label="0010010101 (1) 0010110101" source="38489" target="38348" cy:directed="1"/>
      <edge id="41144" label="0010011001 (1) 0010011011" source="38488" target="38227" cy:directed="1"/>
      <edge id="41143" label="0010011001 (1) 0010011101" source="38488" target="38226" cy:directed="1"/>
      <edge id="41142" label="0010011001 (1) 0010001001" source="38488" target="38383" cy:directed="1"/>
      <edge id="41141" label="0010011001 (1) 0000011001" source="38488" target="38521" cy:directed="1"/>
      <edge id="41140" label="0011101100 (1) 0011101000" source="38487" target="38789" cy:directed="1"/>
      <edge id="41139" label="0011101100 (1) 0011100100" source="38487" target="38781" cy:directed="1"/>
      <edge id="41138" label="0011101100 (1) 0011111100" source="38487" target="38618" cy:directed="1"/>
      <edge id="41137" label="0011101100 (1) 0011001100" source="38487" target="38590" cy:directed="1"/>
      <edge id="41136" label="0011101100 (1) 0010101100" source="38487" target="38547" cy:directed="1"/>
      <edge id="41135" label="1011101100 (1) 1011101000" source="38486" target="38788" cy:directed="1"/>
      <edge id="41134" label="1011101100 (1) 1011100100" source="38486" target="38786" cy:directed="1"/>
      <edge id="41133" label="1011101100 (1) 1011111100" source="38486" target="38616" cy:directed="1"/>
      <edge id="41132" label="1011101100 (1) 1011001100" source="38486" target="38595" cy:directed="1"/>
      <edge id="41131" label="1011101100 (1) 1010101100" source="38486" target="38544" cy:directed="1"/>
      <edge id="41130" label="1011101100 (1) 1111101100" source="38486" target="38553" cy:directed="1"/>
      <edge id="41129" label="1010010001 (1) 1010010011" source="38485" target="38484" cy:directed="1"/>
      <edge id="41128" label="1010010001 (1) 1010010101" source="38485" target="38483" cy:directed="1"/>
      <edge id="41127" label="1010010001 (1) 1010011001" source="38485" target="38482" cy:directed="1"/>
      <edge id="41126" label="1010010001 (1) 1010000001" source="38485" target="38652" cy:directed="1"/>
      <edge id="41125" label="1010010001 (1) 1000010001" source="38485" target="38529" cy:directed="1"/>
      <edge id="41124" label="1010010011 (1) 1010010111" source="38484" target="38177" cy:directed="1"/>
      <edge id="41123" label="1010010011 (1) 1010000011" source="38484" target="38651" cy:directed="1"/>
      <edge id="41122" label="1010010011 (1) 1000010011" source="38484" target="38528" cy:directed="1"/>
      <edge id="41121" label="1010010101 (1) 1010010111" source="38483" target="38177" cy:directed="1"/>
      <edge id="41120" label="1010010101 (1) 1010011101" source="38483" target="38222" cy:directed="1"/>
      <edge id="41119" label="1010010101 (1) 1010000101" source="38483" target="38650" cy:directed="1"/>
      <edge id="41118" label="1010010101 (1) 1010110101" source="38483" target="38354" cy:directed="1"/>
      <edge id="41117" label="1010011001 (1) 1010011011" source="38482" target="38223" cy:directed="1"/>
      <edge id="41116" label="1010011001 (1) 1010011101" source="38482" target="38222" cy:directed="1"/>
      <edge id="41115" label="1010011001 (1) 1010001001" source="38482" target="38387" cy:directed="1"/>
      <edge id="41114" label="1010011001 (1) 1000011001" source="38482" target="38526" cy:directed="1"/>
      <edge id="41113" label="1100011110 (1) 1100010110" source="38481" target="38723" cy:directed="1"/>
      <edge id="41112" label="1100011110 (1) 1100001110" source="38481" target="38644" cy:directed="1"/>
      <edge id="41111" label="1100011110 (1) 1101011110" source="38481" target="38403" cy:directed="1"/>
      <edge id="41110" label="1100011110 (1) 1000011110" source="38481" target="38498" cy:directed="1"/>
      <edge id="41109" label="0100011110 (1) 0100010110" source="38480" target="38726" cy:directed="1"/>
      <edge id="41108" label="0100011110 (1) 0100001110" source="38480" target="38640" cy:directed="1"/>
      <edge id="41107" label="0100011110 (1) 0101011110" source="38480" target="38401" cy:directed="1"/>
      <edge id="41106" label="0100011110 (1) 0000011110" source="38480" target="38497" cy:directed="1"/>
      <edge id="41105" label="1111100101 (1) 1111110101" source="38479" target="38273" cy:directed="1"/>
      <edge id="41104" label="1111100101 (1) 1110100101" source="38479" target="38536" cy:directed="1"/>
      <edge id="41103" label="1111100101 (1) 1101100101" source="38479" target="38513" cy:directed="1"/>
      <edge id="41102" label="1111110001 (1) 1111110101" source="38478" target="38273" cy:directed="1"/>
      <edge id="41101" label="1111110001 (1) 1111111001" source="38478" target="38272" cy:directed="1"/>
      <edge id="41100" label="1111110001 (1) 1110110001" source="38478" target="38535" cy:directed="1"/>
      <edge id="41099" label="1111110001 (1) 1101110001" source="38478" target="38512" cy:directed="1"/>
      <edge id="41098" label="1111110001 (1) 1011110001" source="38478" target="38493" cy:directed="1"/>
      <edge id="41097" label="1110010001 (1) 1110010011" source="38477" target="38476" cy:directed="1"/>
      <edge id="41096" label="1110010001 (1) 1110010101" source="38477" target="38475" cy:directed="1"/>
      <edge id="41095" label="1110010001 (1) 1110011001" source="38477" target="38474" cy:directed="1"/>
      <edge id="41094" label="1110010001 (1) 1110000001" source="38477" target="38649" cy:directed="1"/>
      <edge id="41093" label="1110010001 (1) 1100010001" source="38477" target="38511" cy:directed="1"/>
      <edge id="41092" label="1110010001 (1) 1010010001" source="38477" target="38485" cy:directed="1"/>
      <edge id="41091" label="1110010011 (1) 1110010111" source="38476" target="38173" cy:directed="1"/>
      <edge id="41090" label="1110010011 (1) 1110000011" source="38476" target="38638" cy:directed="1"/>
      <edge id="41089" label="1110010011 (1) 1100010011" source="38476" target="38510" cy:directed="1"/>
      <edge id="41088" label="1110010011 (1) 1010010011" source="38476" target="38484" cy:directed="1"/>
      <edge id="41087" label="1110010101 (1) 1110010111" source="38475" target="38173" cy:directed="1"/>
      <edge id="41086" label="1110010101 (1) 1110011101" source="38475" target="38218" cy:directed="1"/>
      <edge id="41085" label="1110010101 (1) 1110000101" source="38475" target="38637" cy:directed="1"/>
      <edge id="41084" label="1110010101 (1) 1110110101" source="38475" target="38338" cy:directed="1"/>
      <edge id="41083" label="1110010101 (1) 1100010101" source="38475" target="38509" cy:directed="1"/>
      <edge id="41082" label="1110010101 (1) 1010010101" source="38475" target="38483" cy:directed="1"/>
      <edge id="41081" label="1110011001 (1) 1110011011" source="38474" target="38219" cy:directed="1"/>
      <edge id="41080" label="1110011001 (1) 1110011101" source="38474" target="38218" cy:directed="1"/>
      <edge id="41079" label="1110011001 (1) 1110001001" source="38474" target="38384" cy:directed="1"/>
      <edge id="41078" label="1110011001 (1) 1100011001" source="38474" target="38508" cy:directed="1"/>
      <edge id="41077" label="1110011001 (1) 1010011001" source="38474" target="38482" cy:directed="1"/>
      <edge id="41076" label="0111100101 (1) 0111110101" source="38473" target="38271" cy:directed="1"/>
      <edge id="41075" label="0111100101 (1) 0110100101" source="38473" target="38533" cy:directed="1"/>
      <edge id="41074" label="0111100101 (1) 0101100101" source="38473" target="38506" cy:directed="1"/>
      <edge id="41073" label="0111100101 (1) 0011100101" source="38473" target="38496" cy:directed="1"/>
      <edge id="41072" label="0111110001 (1) 0111110101" source="38472" target="38271" cy:directed="1"/>
      <edge id="41071" label="0111110001 (1) 0111111001" source="38472" target="38270" cy:directed="1"/>
      <edge id="41070" label="0111110001 (1) 0110110001" source="38472" target="38532" cy:directed="1"/>
      <edge id="41069" label="0111110001 (1) 0101110001" source="38472" target="38505" cy:directed="1"/>
      <edge id="41068" label="0111110001 (1) 0011110001" source="38472" target="38495" cy:directed="1"/>
      <edge id="41067" label="0110010001 (1) 0110010011" source="38471" target="38470" cy:directed="1"/>
      <edge id="41066" label="0110010001 (1) 0110010101" source="38471" target="38469" cy:directed="1"/>
      <edge id="41065" label="0110010001 (1) 0110011001" source="38471" target="38468" cy:directed="1"/>
      <edge id="41064" label="0110010001 (1) 0110000001" source="38471" target="38636" cy:directed="1"/>
      <edge id="41063" label="0110010001 (1) 0100010001" source="38471" target="38504" cy:directed="1"/>
      <edge id="41062" label="0110010001 (1) 0010010001" source="38471" target="38491" cy:directed="1"/>
      <edge id="41061" label="0110010011 (1) 0110010111" source="38470" target="38172" cy:directed="1"/>
      <edge id="41060" label="0110010011 (1) 0110000011" source="38470" target="38635" cy:directed="1"/>
      <edge id="41059" label="0110010011 (1) 0100010011" source="38470" target="38503" cy:directed="1"/>
      <edge id="41058" label="0110010011 (1) 0010010011" source="38470" target="38490" cy:directed="1"/>
      <edge id="41057" label="0110010101 (1) 0110010111" source="38469" target="38172" cy:directed="1"/>
      <edge id="41056" label="0110010101 (1) 0110011101" source="38469" target="38215" cy:directed="1"/>
      <edge id="41055" label="0110010101 (1) 0110000101" source="38469" target="38634" cy:directed="1"/>
      <edge id="41054" label="0110010101 (1) 0110110101" source="38469" target="38333" cy:directed="1"/>
      <edge id="41053" label="0110010101 (1) 0100010101" source="38469" target="38502" cy:directed="1"/>
      <edge id="41052" label="0110010101 (1) 0010010101" source="38469" target="38489" cy:directed="1"/>
      <edge id="41051" label="0110011001 (1) 0110011011" source="38468" target="38216" cy:directed="1"/>
      <edge id="41050" label="0110011001 (1) 0110011101" source="38468" target="38215" cy:directed="1"/>
      <edge id="41049" label="0110011001 (1) 0110001001" source="38468" target="38374" cy:directed="1"/>
      <edge id="41048" label="0110011001 (1) 0100011001" source="38468" target="38501" cy:directed="1"/>
      <edge id="41047" label="0110011001 (1) 0010011001" source="38468" target="38488" cy:directed="1"/>
      <edge id="41046" label="1000100110 (1) 1000100100" source="38467" target="38857" cy:directed="1"/>
      <edge id="41045" label="1000100110 (1) 1000100010" source="38467" target="38705" cy:directed="1"/>
      <edge id="41044" label="1000100110 (1) 1000110110" source="38467" target="38331" cy:directed="1"/>
      <edge id="41043" label="1000100110 (1) 1001100110" source="38467" target="38380" cy:directed="1"/>
      <edge id="41042" label="1000100110 (1) 1010100110" source="38467" target="38436" cy:directed="1"/>
      <edge id="41041" label="1000100110 (1) 1100100110" source="38467" target="38464" cy:directed="1"/>
      <edge id="41040" label="0000100110 (1) 0000100100" source="38466" target="38848" cy:directed="1"/>
      <edge id="41039" label="0000100110 (1) 0000100010" source="38466" target="38700" cy:directed="1"/>
      <edge id="41038" label="0000100110 (1) 0000110110" source="38466" target="38330" cy:directed="1"/>
      <edge id="41037" label="0000100110 (1) 0001100110" source="38466" target="38379" cy:directed="1"/>
      <edge id="41036" label="0000100110 (1) 0010100110" source="38466" target="38434" cy:directed="1"/>
      <edge id="41035" label="1010011110 (1) 1010010110" source="38465" target="38712" cy:directed="1"/>
      <edge id="41034" label="1010011110 (1) 1010001110" source="38465" target="38623" cy:directed="1"/>
      <edge id="41033" label="1100100110 (1) 1100100100" source="38464" target="38841" cy:directed="1"/>
      <edge id="41032" label="1100100110 (1) 1100100010" source="38464" target="38701" cy:directed="1"/>
      <edge id="41031" label="1100100110 (1) 1100110110" source="38464" target="38327" cy:directed="1"/>
      <edge id="41030" label="1100100110 (1) 1101100110" source="38464" target="38368" cy:directed="1"/>
      <edge id="41029" label="1111101010 (1) 1111101000" source="38463" target="38838" cy:directed="1"/>
      <edge id="41028" label="1111101010 (1) 1111100010" source="38463" target="38719" cy:directed="1"/>
      <edge id="41027" label="1111101010 (1) 1111111010" source="38463" target="38326" cy:directed="1"/>
      <edge id="41026" label="1111101010 (1) 1110101010" source="38463" target="38399" cy:directed="1"/>
      <edge id="41025" label="1111101010 (1) 1101101010" source="38463" target="38499" cy:directed="1"/>
      <edge id="41024" label="0010011110 (1) 0010010110" source="38462" target="38713" cy:directed="1"/>
      <edge id="41023" label="0010011110 (1) 0010001110" source="38462" target="38621" cy:directed="1"/>
      <edge id="41022" label="0100100110 (1) 0100100100" source="38461" target="38834" cy:directed="1"/>
      <edge id="41021" label="0100100110 (1) 0100100010" source="38461" target="38693" cy:directed="1"/>
      <edge id="41020" label="0100100110 (1) 0100110110" source="38461" target="38317" cy:directed="1"/>
      <edge id="41019" label="0100100110 (1) 0101100110" source="38461" target="38366" cy:directed="1"/>
      <edge id="41018" label="0100100110 (1) 0000100110" source="38461" target="38466" cy:directed="1"/>
      <edge id="41017" label="0111101010 (1) 0111101000" source="38460" target="38830" cy:directed="1"/>
      <edge id="41016" label="0111101010 (1) 0111100010" source="38460" target="38715" cy:directed="1"/>
      <edge id="41015" label="0111101010 (1) 0111111010" source="38460" target="38316" cy:directed="1"/>
      <edge id="41014" label="0111101010 (1) 0110101010" source="38460" target="38389" cy:directed="1"/>
      <edge id="41013" label="0111101010 (1) 0101101010" source="38460" target="38492" cy:directed="1"/>
      <edge id="41012" label="0111101010 (1) 0011101010" source="38460" target="38358" cy:directed="1"/>
      <edge id="41011" label="1110011110 (1) 1110010110" source="38459" target="38706" cy:directed="1"/>
      <edge id="41010" label="1110011110 (1) 1110001110" source="38459" target="38609" cy:directed="1"/>
      <edge id="41009" label="1110011110 (1) 1100011110" source="38459" target="38481" cy:directed="1"/>
      <edge id="41008" label="1110011110 (1) 1010011110" source="38459" target="38465" cy:directed="1"/>
      <edge id="41007" label="0110011110 (1) 0110010110" source="38458" target="38708" cy:directed="1"/>
      <edge id="41006" label="0110011110 (1) 0110001110" source="38458" target="38610" cy:directed="1"/>
      <edge id="41005" label="0110011110 (1) 0100011110" source="38458" target="38480" cy:directed="1"/>
      <edge id="41004" label="0110011110 (1) 0010011110" source="38458" target="38462" cy:directed="1"/>
      <edge id="41003" label="1001010011 (1) 1001010111" source="38457" target="38149" cy:directed="1"/>
      <edge id="41002" label="1001010011 (1) 1001000011" source="38457" target="38613" cy:directed="1"/>
      <edge id="41001" label="1001010101 (1) 1001010111" source="38456" target="38149" cy:directed="1"/>
      <edge id="41000" label="1001010101 (1) 1001011101" source="38456" target="38208" cy:directed="1"/>
      <edge id="40999" label="1001010101 (1) 1001000101" source="38456" target="38612" cy:directed="1"/>
      <edge id="40998" label="1001010101 (1) 1001110101" source="38456" target="38313" cy:directed="1"/>
      <edge id="40997" label="1001010101 (1) 1011010101" source="38456" target="38409" cy:directed="1"/>
      <edge id="40996" label="1001011001 (1) 1001011011" source="38455" target="38209" cy:directed="1"/>
      <edge id="40995" label="1001011001 (1) 1001011101" source="38455" target="38208" cy:directed="1"/>
      <edge id="40994" label="1001011001 (1) 1001001001" source="38455" target="38428" cy:directed="1"/>
      <edge id="40993" label="0001010011 (1) 0001010111" source="38454" target="38148" cy:directed="1"/>
      <edge id="40992" label="0001010011 (1) 0001000011" source="38454" target="38615" cy:directed="1"/>
      <edge id="40991" label="0001010101 (1) 0001010111" source="38453" target="38148" cy:directed="1"/>
      <edge id="40990" label="0001010101 (1) 0001011101" source="38453" target="38206" cy:directed="1"/>
      <edge id="40989" label="0001010101 (1) 0001000101" source="38453" target="38614" cy:directed="1"/>
      <edge id="40988" label="0001010101 (1) 0001110101" source="38453" target="38307" cy:directed="1"/>
      <edge id="40987" label="0001010101 (1) 0011010101" source="38453" target="38405" cy:directed="1"/>
      <edge id="40986" label="0001011001 (1) 0001011011" source="38452" target="38207" cy:directed="1"/>
      <edge id="40985" label="0001011001 (1) 0001011101" source="38452" target="38206" cy:directed="1"/>
      <edge id="40984" label="0001011001 (1) 0001001001" source="38452" target="38423" cy:directed="1"/>
      <edge id="40983" label="0000101010 (1) 0000101000" source="38451" target="38827" cy:directed="1"/>
      <edge id="40982" label="0000101010 (1) 0000100010" source="38451" target="38700" cy:directed="1"/>
      <edge id="40981" label="0000101010 (1) 0000111010" source="38451" target="38450" cy:directed="1"/>
      <edge id="40980" label="0000101010 (1) 0000001010" source="38451" target="38900" cy:directed="1"/>
      <edge id="40979" label="0000101010 (1) 0001101010" source="38451" target="38449" cy:directed="1"/>
      <edge id="40978" label="0000101010 (1) 0010101010" source="38451" target="38448" cy:directed="1"/>
      <edge id="40977" label="0000111010 (1) 0000111000" source="38450" target="38874" cy:directed="1"/>
      <edge id="40976" label="0000111010 (1) 0000111110" source="38450" target="38254" cy:directed="1"/>
      <edge id="40975" label="0000111010 (1) 0000110010" source="38450" target="38699" cy:directed="1"/>
      <edge id="40974" label="0000111010 (1) 0000011010" source="38450" target="38791" cy:directed="1"/>
      <edge id="40973" label="0000111010 (1) 0001111010" source="38450" target="38359" cy:directed="1"/>
      <edge id="40972" label="0000111010 (1) 0010111010" source="38450" target="38402" cy:directed="1"/>
      <edge id="40971" label="0001101010 (1) 0001101000" source="38449" target="38826" cy:directed="1"/>
      <edge id="40970" label="0001101010 (1) 0001100010" source="38449" target="38698" cy:directed="1"/>
      <edge id="40969" label="0001101010 (1) 0001111010" source="38449" target="38359" cy:directed="1"/>
      <edge id="40968" label="0001101010 (1) 0001001010" source="38449" target="38867" cy:directed="1"/>
      <edge id="40967" label="0001101010 (1) 0011101010" source="38449" target="38358" cy:directed="1"/>
      <edge id="40966" label="0010101010 (1) 0010101000" source="38448" target="38825" cy:directed="1"/>
      <edge id="40965" label="0010101010 (1) 0010100010" source="38448" target="38697" cy:directed="1"/>
      <edge id="40964" label="0010101010 (1) 0010111010" source="38448" target="38402" cy:directed="1"/>
      <edge id="40963" label="0010101010 (1) 0010001010" source="38448" target="38877" cy:directed="1"/>
      <edge id="40962" label="1000101010 (1) 1000101000" source="38447" target="38824" cy:directed="1"/>
      <edge id="40961" label="1000101010 (1) 1000100010" source="38447" target="38705" cy:directed="1"/>
      <edge id="40960" label="1000101010 (1) 1000111010" source="38447" target="38446" cy:directed="1"/>
      <edge id="40959" label="1000101010 (1) 1000001010" source="38447" target="38904" cy:directed="1"/>
      <edge id="40958" label="1000101010 (1) 1001101010" source="38447" target="38445" cy:directed="1"/>
      <edge id="40957" label="1000101010 (1) 1010101010" source="38447" target="38444" cy:directed="1"/>
      <edge id="40956" label="1000101010 (1) 1100101010" source="38447" target="38443" cy:directed="1"/>
      <edge id="40955" label="1000111010 (1) 1000111000" source="38446" target="38876" cy:directed="1"/>
      <edge id="40954" label="1000111010 (1) 1000111110" source="38446" target="38255" cy:directed="1"/>
      <edge id="40953" label="1000111010 (1) 1000110010" source="38446" target="38704" cy:directed="1"/>
      <edge id="40952" label="1000111010 (1) 1000011010" source="38446" target="38793" cy:directed="1"/>
      <edge id="40951" label="1000111010 (1) 1001111010" source="38446" target="38357" cy:directed="1"/>
      <edge id="40950" label="1000111010 (1) 1010111010" source="38446" target="38400" cy:directed="1"/>
      <edge id="40949" label="1001101010 (1) 1001101000" source="38445" target="38823" cy:directed="1"/>
      <edge id="40948" label="1001101010 (1) 1001100010" source="38445" target="38703" cy:directed="1"/>
      <edge id="40947" label="1001101010 (1) 1001111010" source="38445" target="38357" cy:directed="1"/>
      <edge id="40946" label="1001101010 (1) 1001001010" source="38445" target="38868" cy:directed="1"/>
      <edge id="40945" label="1001101010 (1) 1011101010" source="38445" target="38356" cy:directed="1"/>
      <edge id="40944" label="1001101010 (1) 1101101010" source="38445" target="38499" cy:directed="1"/>
      <edge id="40943" label="1010101010 (1) 1010101000" source="38444" target="38822" cy:directed="1"/>
      <edge id="40942" label="1010101010 (1) 1010100010" source="38444" target="38702" cy:directed="1"/>
      <edge id="40941" label="1010101010 (1) 1010111010" source="38444" target="38400" cy:directed="1"/>
      <edge id="40940" label="1010101010 (1) 1010001010" source="38444" target="38880" cy:directed="1"/>
      <edge id="40939" label="1010101010 (1) 1110101010" source="38444" target="38399" cy:directed="1"/>
      <edge id="40938" label="1100101010 (1) 1100101000" source="38443" target="38821" cy:directed="1"/>
      <edge id="40937" label="1100101010 (1) 1100100010" source="38443" target="38701" cy:directed="1"/>
      <edge id="40936" label="1100101010 (1) 1100111010" source="38443" target="38435" cy:directed="1"/>
      <edge id="40935" label="1100101010 (1) 1100001010" source="38443" target="38898" cy:directed="1"/>
      <edge id="40934" label="1100101010 (1) 1101101010" source="38443" target="38499" cy:directed="1"/>
      <edge id="40933" label="1101010011 (1) 1101010111" source="38442" target="38140" cy:directed="1"/>
      <edge id="40932" label="1101010011 (1) 1101000011" source="38442" target="38605" cy:directed="1"/>
      <edge id="40931" label="1101010011 (1) 1101110011" source="38442" target="38103" cy:directed="1"/>
      <edge id="40930" label="1101010011 (1) 1001010011" source="38442" target="38457" cy:directed="1"/>
      <edge id="40929" label="1101010101 (1) 1101010111" source="38441" target="38140" cy:directed="1"/>
      <edge id="40928" label="1101010101 (1) 1101011101" source="38441" target="38204" cy:directed="1"/>
      <edge id="40927" label="1101010101 (1) 1101000101" source="38441" target="38604" cy:directed="1"/>
      <edge id="40926" label="1101010101 (1) 1101110101" source="38441" target="38301" cy:directed="1"/>
      <edge id="40925" label="1101010101 (1) 1001010101" source="38441" target="38456" cy:directed="1"/>
      <edge id="40924" label="1101011001 (1) 1101011011" source="38440" target="38205" cy:directed="1"/>
      <edge id="40923" label="1101011001 (1) 1101011101" source="38440" target="38204" cy:directed="1"/>
      <edge id="40922" label="1101011001 (1) 1101001001" source="38440" target="38418" cy:directed="1"/>
      <edge id="40921" label="1101011001 (1) 1101111001" source="38440" target="38300" cy:directed="1"/>
      <edge id="40920" label="1101011001 (1) 1001011001" source="38440" target="38455" cy:directed="1"/>
      <edge id="40919" label="0101010011 (1) 0101010111" source="38439" target="38137" cy:directed="1"/>
      <edge id="40918" label="0101010011 (1) 0101000011" source="38439" target="38602" cy:directed="1"/>
      <edge id="40917" label="0101010011 (1) 0101110011" source="38439" target="38100" cy:directed="1"/>
      <edge id="40916" label="0101010011 (1) 0001010011" source="38439" target="38454" cy:directed="1"/>
      <edge id="40915" label="0101010101 (1) 0101010111" source="38438" target="38137" cy:directed="1"/>
      <edge id="40914" label="0101010101 (1) 0101011101" source="38438" target="38202" cy:directed="1"/>
      <edge id="40913" label="0101010101 (1) 0101000101" source="38438" target="38601" cy:directed="1"/>
      <edge id="40912" label="0101010101 (1) 0101110101" source="38438" target="38299" cy:directed="1"/>
      <edge id="40911" label="0101010101 (1) 0001010101" source="38438" target="38453" cy:directed="1"/>
      <edge id="40910" label="0101011001 (1) 0101011011" source="38437" target="38203" cy:directed="1"/>
      <edge id="40909" label="0101011001 (1) 0101011101" source="38437" target="38202" cy:directed="1"/>
      <edge id="40908" label="0101011001 (1) 0101001001" source="38437" target="38414" cy:directed="1"/>
      <edge id="40907" label="0101011001 (1) 0101111001" source="38437" target="38298" cy:directed="1"/>
      <edge id="40906" label="0101011001 (1) 0001011001" source="38437" target="38452" cy:directed="1"/>
      <edge id="40905" label="1010100110 (1) 1010100100" source="38436" target="38819" cy:directed="1"/>
      <edge id="40904" label="1010100110 (1) 1010100010" source="38436" target="38702" cy:directed="1"/>
      <edge id="40903" label="1010100110 (1) 1010110110" source="38436" target="38297" cy:directed="1"/>
      <edge id="40902" label="1010100110 (1) 1110100110" source="38436" target="38422" cy:directed="1"/>
      <edge id="40901" label="1100111010 (1) 1100111000" source="38435" target="38871" cy:directed="1"/>
      <edge id="40900" label="1100111010 (1) 1100111110" source="38435" target="38251" cy:directed="1"/>
      <edge id="40899" label="1100111010 (1) 1100110010" source="38435" target="38695" cy:directed="1"/>
      <edge id="40898" label="1100111010 (1) 1100011010" source="38435" target="38784" cy:directed="1"/>
      <edge id="40897" label="1100111010 (1) 1101111010" source="38435" target="38355" cy:directed="1"/>
      <edge id="40896" label="1100111010 (1) 1000111010" source="38435" target="38446" cy:directed="1"/>
      <edge id="40895" label="0010100110 (1) 0010100100" source="38434" target="38816" cy:directed="1"/>
      <edge id="40894" label="0010100110 (1) 0010100010" source="38434" target="38697" cy:directed="1"/>
      <edge id="40893" label="0010100110 (1) 0010110110" source="38434" target="38296" cy:directed="1"/>
      <edge id="40892" label="0100101010 (1) 0100101000" source="38433" target="38815" cy:directed="1"/>
      <edge id="40891" label="0100101010 (1) 0100100010" source="38433" target="38693" cy:directed="1"/>
      <edge id="40890" label="0100101010 (1) 0100111010" source="38433" target="38432" cy:directed="1"/>
      <edge id="40889" label="0100101010 (1) 0100001010" source="38433" target="38895" cy:directed="1"/>
      <edge id="40888" label="0100101010 (1) 0101101010" source="38433" target="38492" cy:directed="1"/>
      <edge id="40887" label="0100101010 (1) 0000101010" source="38433" target="38451" cy:directed="1"/>
      <edge id="40886" label="0100111010 (1) 0100111000" source="38432" target="38870" cy:directed="1"/>
      <edge id="40885" label="0100111010 (1) 0100111110" source="38432" target="38253" cy:directed="1"/>
      <edge id="40884" label="0100111010 (1) 0100110010" source="38432" target="38692" cy:directed="1"/>
      <edge id="40883" label="0100111010 (1) 0100011010" source="38432" target="38780" cy:directed="1"/>
      <edge id="40882" label="0100111010 (1) 0101111010" source="38432" target="38346" cy:directed="1"/>
      <edge id="40881" label="0100111010 (1) 0000111010" source="38432" target="38450" cy:directed="1"/>
      <edge id="40880" label="1000001001 (1) 1000001011" source="38431" target="38430" cy:directed="1"/>
      <edge id="40879" label="1000001001 (1) 1000001101" source="38431" target="38429" cy:directed="1"/>
      <edge id="40878" label="1000001001 (1) 1000000001" source="38431" target="38687" cy:directed="1"/>
      <edge id="40877" label="1000001001 (1) 1001001001" source="38431" target="38428" cy:directed="1"/>
      <edge id="40876" label="1000001001 (1) 1100001001" source="38431" target="38427" cy:directed="1"/>
      <edge id="40875" label="1000001011 (1) 1000001111" source="38430" target="38131" cy:directed="1"/>
      <edge id="40874" label="1000001011 (1) 1000000011" source="38430" target="38686" cy:directed="1"/>
      <edge id="40873" label="1000001011 (1) 1001001011" source="38430" target="38345" cy:directed="1"/>
      <edge id="40872" label="1000001011 (1) 1100001011" source="38430" target="38420" cy:directed="1"/>
      <edge id="40871" label="1000001101 (1) 1000001111" source="38429" target="38131" cy:directed="1"/>
      <edge id="40870" label="1000001101 (1) 1000000101" source="38429" target="38685" cy:directed="1"/>
      <edge id="40869" label="1000001101 (1) 1001001101" source="38429" target="38344" cy:directed="1"/>
      <edge id="40868" label="1000001101 (1) 1010001101" source="38429" target="38385" cy:directed="1"/>
      <edge id="40867" label="1000001101 (1) 1100001101" source="38429" target="38419" cy:directed="1"/>
      <edge id="40866" label="1001001001 (1) 1001001011" source="38428" target="38345" cy:directed="1"/>
      <edge id="40865" label="1001001001 (1) 1001001101" source="38428" target="38344" cy:directed="1"/>
      <edge id="40864" label="1001001001 (1) 1001000001" source="38428" target="38684" cy:directed="1"/>
      <edge id="40863" label="1001001001 (1) 1101001001" source="38428" target="38418" cy:directed="1"/>
      <edge id="40862" label="1100001001 (1) 1100001011" source="38427" target="38420" cy:directed="1"/>
      <edge id="40861" label="1100001001 (1) 1100001101" source="38427" target="38419" cy:directed="1"/>
      <edge id="40860" label="1100001001 (1) 1100000001" source="38427" target="38683" cy:directed="1"/>
      <edge id="40859" label="1100001001 (1) 1101001001" source="38427" target="38418" cy:directed="1"/>
      <edge id="40858" label="0000001001 (1) 0000001011" source="38426" target="38425" cy:directed="1"/>
      <edge id="40857" label="0000001001 (1) 0000001101" source="38426" target="38424" cy:directed="1"/>
      <edge id="40856" label="0000001001 (1) 0000000001" source="38426" target="38691" cy:directed="1"/>
      <edge id="40855" label="0000001001 (1) 0001001001" source="38426" target="38423" cy:directed="1"/>
      <edge id="40854" label="0000001011 (1) 0000001111" source="38425" target="38132" cy:directed="1"/>
      <edge id="40853" label="0000001011 (1) 0000000011" source="38425" target="38690" cy:directed="1"/>
      <edge id="40852" label="0000001011 (1) 0001001011" source="38425" target="38352" cy:directed="1"/>
      <edge id="40851" label="0000001101 (1) 0000001111" source="38424" target="38132" cy:directed="1"/>
      <edge id="40850" label="0000001101 (1) 0000000101" source="38424" target="38689" cy:directed="1"/>
      <edge id="40849" label="0000001101 (1) 0001001101" source="38424" target="38351" cy:directed="1"/>
      <edge id="40848" label="0000001101 (1) 0010001101" source="38424" target="38381" cy:directed="1"/>
      <edge id="40847" label="0001001001 (1) 0001001011" source="38423" target="38352" cy:directed="1"/>
      <edge id="40846" label="0001001001 (1) 0001001101" source="38423" target="38351" cy:directed="1"/>
      <edge id="40845" label="0001001001 (1) 0001000001" source="38423" target="38688" cy:directed="1"/>
      <edge id="40844" label="1110100110 (1) 1110100100" source="38422" target="38812" cy:directed="1"/>
      <edge id="40843" label="1110100110 (1) 1110100010" source="38422" target="38668" cy:directed="1"/>
      <edge id="40842" label="1110100110 (1) 1110110110" source="38422" target="38286" cy:directed="1"/>
      <edge id="40841" label="1110100110 (1) 1100100110" source="38422" target="38464" cy:directed="1"/>
      <edge id="40840" label="0110100110 (1) 0110100100" source="38421" target="38808" cy:directed="1"/>
      <edge id="40839" label="0110100110 (1) 0110100010" source="38421" target="38654" cy:directed="1"/>
      <edge id="40838" label="0110100110 (1) 0110110110" source="38421" target="38285" cy:directed="1"/>
      <edge id="40837" label="0110100110 (1) 0100100110" source="38421" target="38461" cy:directed="1"/>
      <edge id="40836" label="0110100110 (1) 0010100110" source="38421" target="38434" cy:directed="1"/>
      <edge id="40835" label="1100001011 (1) 1100001111" source="38420" target="38125" cy:directed="1"/>
      <edge id="40834" label="1100001011 (1) 1100000011" source="38420" target="38680" cy:directed="1"/>
      <edge id="40833" label="1100001011 (1) 1101001011" source="38420" target="38341" cy:directed="1"/>
      <edge id="40832" label="1100001101 (1) 1100001111" source="38419" target="38125" cy:directed="1"/>
      <edge id="40831" label="1100001101 (1) 1100000101" source="38419" target="38679" cy:directed="1"/>
      <edge id="40830" label="1100001101 (1) 1101001101" source="38419" target="38340" cy:directed="1"/>
      <edge id="40829" label="1101001001 (1) 1101001011" source="38418" target="38341" cy:directed="1"/>
      <edge id="40828" label="1101001001 (1) 1101001101" source="38418" target="38340" cy:directed="1"/>
      <edge id="40827" label="1101001001 (1) 1101000001" source="38418" target="38678" cy:directed="1"/>
      <edge id="40826" label="1101001001 (1) 1101101001" source="38418" target="38339" cy:directed="1"/>
      <edge id="40825" label="0100001001 (1) 0100001011" source="38417" target="38416" cy:directed="1"/>
      <edge id="40824" label="0100001001 (1) 0100001101" source="38417" target="38415" cy:directed="1"/>
      <edge id="40823" label="0100001001 (1) 0100000001" source="38417" target="38677" cy:directed="1"/>
      <edge id="40822" label="0100001001 (1) 0101001001" source="38417" target="38414" cy:directed="1"/>
      <edge id="40821" label="0100001001 (1) 0000001001" source="38417" target="38426" cy:directed="1"/>
      <edge id="40820" label="0100001011 (1) 0100001111" source="38416" target="38123" cy:directed="1"/>
      <edge id="40819" label="0100001011 (1) 0100000011" source="38416" target="38676" cy:directed="1"/>
      <edge id="40818" label="0100001011 (1) 0101001011" source="38416" target="38336" cy:directed="1"/>
      <edge id="40817" label="0100001011 (1) 0000001011" source="38416" target="38425" cy:directed="1"/>
      <edge id="40816" label="0100001101 (1) 0100001111" source="38415" target="38123" cy:directed="1"/>
      <edge id="40815" label="0100001101 (1) 0100000101" source="38415" target="38675" cy:directed="1"/>
      <edge id="40814" label="0100001101 (1) 0101001101" source="38415" target="38335" cy:directed="1"/>
      <edge id="40813" label="0100001101 (1) 0000001101" source="38415" target="38424" cy:directed="1"/>
      <edge id="40812" label="0101001001 (1) 0101001011" source="38414" target="38336" cy:directed="1"/>
      <edge id="40811" label="0101001001 (1) 0101001101" source="38414" target="38335" cy:directed="1"/>
      <edge id="40810" label="0101001001 (1) 0101000001" source="38414" target="38674" cy:directed="1"/>
      <edge id="40809" label="0101001001 (1) 0101101001" source="38414" target="38334" cy:directed="1"/>
      <edge id="40808" label="0101001001 (1) 0001001001" source="38414" target="38423" cy:directed="1"/>
      <edge id="40807" label="1001011110 (1) 1001010110" source="38413" target="38671" cy:directed="1"/>
      <edge id="40806" label="1001011110 (1) 1001001110" source="38413" target="38596" cy:directed="1"/>
      <edge id="40805" label="1001011110 (1) 1011011110" source="38413" target="38369" cy:directed="1"/>
      <edge id="40804" label="0001011110 (1) 0001010110" source="38412" target="38673" cy:directed="1"/>
      <edge id="40803" label="0001011110 (1) 0001001110" source="38412" target="38591" cy:directed="1"/>
      <edge id="40802" label="0001011110 (1) 0011011110" source="38412" target="38367" cy:directed="1"/>
      <edge id="40801" label="1011010001 (1) 1011010011" source="38411" target="38410" cy:directed="1"/>
      <edge id="40800" label="1011010001 (1) 1011010101" source="38411" target="38409" cy:directed="1"/>
      <edge id="40799" label="1011010001 (1) 1011011001" source="38411" target="38408" cy:directed="1"/>
      <edge id="40798" label="1011010001 (1) 1011000001" source="38411" target="38588" cy:directed="1"/>
      <edge id="40797" label="1011010001 (1) 1010010001" source="38411" target="38485" cy:directed="1"/>
      <edge id="40796" label="1011010001 (1) 1001010001" source="38411" target="38525" cy:directed="1"/>
      <edge id="40795" label="1011010011 (1) 1011010111" source="38410" target="38120" cy:directed="1"/>
      <edge id="40794" label="1011010011 (1) 1011000011" source="38410" target="38587" cy:directed="1"/>
      <edge id="40793" label="1011010011 (1) 1010010011" source="38410" target="38484" cy:directed="1"/>
      <edge id="40792" label="1011010011 (1) 1001010011" source="38410" target="38457" cy:directed="1"/>
      <edge id="40791" label="1011010101 (1) 1011010111" source="38409" target="38120" cy:directed="1"/>
      <edge id="40790" label="1011010101 (1) 1011011101" source="38409" target="38191" cy:directed="1"/>
      <edge id="40789" label="1011010101 (1) 1011000101" source="38409" target="38586" cy:directed="1"/>
      <edge id="40788" label="1011010101 (1) 1011110101" source="38409" target="38278" cy:directed="1"/>
      <edge id="40787" label="1011010101 (1) 1010010101" source="38409" target="38483" cy:directed="1"/>
      <edge id="40786" label="1011011001 (1) 1011011011" source="38408" target="38192" cy:directed="1"/>
      <edge id="40785" label="1011011001 (1) 1011011101" source="38408" target="38191" cy:directed="1"/>
      <edge id="40784" label="1011011001 (1) 1011001001" source="38408" target="38321" cy:directed="1"/>
      <edge id="40783" label="1011011001 (1) 1010011001" source="38408" target="38482" cy:directed="1"/>
      <edge id="40782" label="1011011001 (1) 1001011001" source="38408" target="38455" cy:directed="1"/>
      <edge id="40781" label="0011010001 (1) 0011010011" source="38407" target="38406" cy:directed="1"/>
      <edge id="40780" label="0011010001 (1) 0011010101" source="38407" target="38405" cy:directed="1"/>
      <edge id="40779" label="0011010001 (1) 0011011001" source="38407" target="38404" cy:directed="1"/>
      <edge id="40778" label="0011010001 (1) 0011000001" source="38407" target="38594" cy:directed="1"/>
      <edge id="40777" label="0011010001 (1) 0010010001" source="38407" target="38491" cy:directed="1"/>
      <edge id="40776" label="0011010001 (1) 0001010001" source="38407" target="38520" cy:directed="1"/>
      <edge id="40775" label="0011010011 (1) 0011010111" source="38406" target="38118" cy:directed="1"/>
      <edge id="40774" label="0011010011 (1) 0011000011" source="38406" target="38593" cy:directed="1"/>
      <edge id="40773" label="0011010011 (1) 0010010011" source="38406" target="38490" cy:directed="1"/>
      <edge id="40772" label="0011010011 (1) 0001010011" source="38406" target="38454" cy:directed="1"/>
      <edge id="40771" label="0011010101 (1) 0011010111" source="38405" target="38118" cy:directed="1"/>
      <edge id="40770" label="0011010101 (1) 0011011101" source="38405" target="38193" cy:directed="1"/>
      <edge id="40769" label="0011010101 (1) 0011000101" source="38405" target="38592" cy:directed="1"/>
      <edge id="40768" label="0011010101 (1) 0011110101" source="38405" target="38276" cy:directed="1"/>
      <edge id="40767" label="0011010101 (1) 0010010101" source="38405" target="38489" cy:directed="1"/>
      <edge id="40766" label="0011011001 (1) 0011011011" source="38404" target="38194" cy:directed="1"/>
      <edge id="40765" label="0011011001 (1) 0011011101" source="38404" target="38193" cy:directed="1"/>
      <edge id="40764" label="0011011001 (1) 0011001001" source="38404" target="38324" cy:directed="1"/>
      <edge id="40763" label="0011011001 (1) 0010011001" source="38404" target="38488" cy:directed="1"/>
      <edge id="40762" label="0011011001 (1) 0001011001" source="38404" target="38452" cy:directed="1"/>
      <edge id="40761" label="1101011110 (1) 1101010110" source="38403" target="38665" cy:directed="1"/>
      <edge id="40760" label="1101011110 (1) 1101001110" source="38403" target="38584" cy:directed="1"/>
      <edge id="40759" label="1101011110 (1) 1101111110" source="38403" target="38211" cy:directed="1"/>
      <edge id="40758" label="1101011110 (1) 1001011110" source="38403" target="38413" cy:directed="1"/>
      <edge id="40757" label="0010111010 (1) 0010111000" source="38402" target="38866" cy:directed="1"/>
      <edge id="40756" label="0010111010 (1) 0010111110" source="38402" target="38228" cy:directed="1"/>
      <edge id="40755" label="0010111010 (1) 0010110010" source="38402" target="38667" cy:directed="1"/>
      <edge id="40754" label="0010111010 (1) 0010011010" source="38402" target="38770" cy:directed="1"/>
      <edge id="40753" label="0101011110 (1) 0101010110" source="38401" target="38666" cy:directed="1"/>
      <edge id="40752" label="0101011110 (1) 0101001110" source="38401" target="38582" cy:directed="1"/>
      <edge id="40751" label="0101011110 (1) 0101111110" source="38401" target="38210" cy:directed="1"/>
      <edge id="40750" label="0101011110 (1) 0001011110" source="38401" target="38412" cy:directed="1"/>
      <edge id="40749" label="1010111010 (1) 1010111000" source="38400" target="38869" cy:directed="1"/>
      <edge id="40748" label="1010111010 (1) 1010111110" source="38400" target="38229" cy:directed="1"/>
      <edge id="40747" label="1010111010 (1) 1010110010" source="38400" target="38669" cy:directed="1"/>
      <edge id="40746" label="1010111010 (1) 1010011010" source="38400" target="38772" cy:directed="1"/>
      <edge id="40745" label="1110101010 (1) 1110101000" source="38399" target="38805" cy:directed="1"/>
      <edge id="40744" label="1110101010 (1) 1110100010" source="38399" target="38668" cy:directed="1"/>
      <edge id="40743" label="1110101010 (1) 1110111010" source="38399" target="38390" cy:directed="1"/>
      <edge id="40742" label="1110101010 (1) 1110001010" source="38399" target="38875" cy:directed="1"/>
      <edge id="40741" label="1110101010 (1) 1100101010" source="38399" target="38443" cy:directed="1"/>
      <edge id="40740" label="0111010001 (1) 0111010011" source="38398" target="38397" cy:directed="1"/>
      <edge id="40739" label="0111010001 (1) 0111010101" source="38398" target="38396" cy:directed="1"/>
      <edge id="40738" label="0111010001 (1) 0111011001" source="38398" target="38395" cy:directed="1"/>
      <edge id="40737" label="0111010001 (1) 0111000001" source="38398" target="38577" cy:directed="1"/>
      <edge id="40736" label="0111010001 (1) 0111110001" source="38398" target="38472" cy:directed="1"/>
      <edge id="40735" label="0111010001 (1) 0110010001" source="38398" target="38471" cy:directed="1"/>
      <edge id="40734" label="0111010001 (1) 0101010001" source="38398" target="38500" cy:directed="1"/>
      <edge id="40733" label="0111010001 (1) 0011010001" source="38398" target="38407" cy:directed="1"/>
      <edge id="40732" label="0111010011 (1) 0111010111" source="38397" target="38116" cy:directed="1"/>
      <edge id="40731" label="0111010011 (1) 0111000011" source="38397" target="38576" cy:directed="1"/>
      <edge id="40730" label="0111010011 (1) 0111110011" source="38397" target="38088" cy:directed="1"/>
      <edge id="40729" label="0111010011 (1) 0110010011" source="38397" target="38470" cy:directed="1"/>
      <edge id="40728" label="0111010011 (1) 0101010011" source="38397" target="38439" cy:directed="1"/>
      <edge id="40727" label="0111010011 (1) 0011010011" source="38397" target="38406" cy:directed="1"/>
      <edge id="40726" label="0111010101 (1) 0111010111" source="38396" target="38116" cy:directed="1"/>
      <edge id="40725" label="0111010101 (1) 0111011101" source="38396" target="38186" cy:directed="1"/>
      <edge id="40724" label="0111010101 (1) 0111000101" source="38396" target="38575" cy:directed="1"/>
      <edge id="40723" label="0111010101 (1) 0111110101" source="38396" target="38271" cy:directed="1"/>
      <edge id="40722" label="0111010101 (1) 0110010101" source="38396" target="38469" cy:directed="1"/>
      <edge id="40721" label="0111010101 (1) 0101010101" source="38396" target="38438" cy:directed="1"/>
      <edge id="40720" label="0111010101 (1) 0011010101" source="38396" target="38405" cy:directed="1"/>
      <edge id="40719" label="0111011001 (1) 0111011011" source="38395" target="38187" cy:directed="1"/>
      <edge id="40718" label="0111011001 (1) 0111011101" source="38395" target="38186" cy:directed="1"/>
      <edge id="40717" label="0111011001 (1) 0111001001" source="38395" target="38305" cy:directed="1"/>
      <edge id="40716" label="0111011001 (1) 0111111001" source="38395" target="38270" cy:directed="1"/>
      <edge id="40715" label="0111011001 (1) 0110011001" source="38395" target="38468" cy:directed="1"/>
      <edge id="40714" label="0111011001 (1) 0101011001" source="38395" target="38437" cy:directed="1"/>
      <edge id="40713" label="0111011001 (1) 0011011001" source="38395" target="38404" cy:directed="1"/>
      <edge id="40712" label="1111010001 (1) 1111010011" source="38394" target="38393" cy:directed="1"/>
      <edge id="40711" label="1111010001 (1) 1111010101" source="38394" target="38392" cy:directed="1"/>
      <edge id="40710" label="1111010001 (1) 1111011001" source="38394" target="38391" cy:directed="1"/>
      <edge id="40709" label="1111010001 (1) 1111000001" source="38394" target="38585" cy:directed="1"/>
      <edge id="40708" label="1111010001 (1) 1111110001" source="38394" target="38478" cy:directed="1"/>
      <edge id="40707" label="1111010001 (1) 1110010001" source="38394" target="38477" cy:directed="1"/>
      <edge id="40706" label="1111010001 (1) 1101010001" source="38394" target="38507" cy:directed="1"/>
      <edge id="40705" label="1111010001 (1) 1011010001" source="38394" target="38411" cy:directed="1"/>
      <edge id="40704" label="1111010011 (1) 1111010111" source="38393" target="38115" cy:directed="1"/>
      <edge id="40703" label="1111010011 (1) 1111000011" source="38393" target="38580" cy:directed="1"/>
      <edge id="40702" label="1111010011 (1) 1111110011" source="38393" target="38084" cy:directed="1"/>
      <edge id="40701" label="1111010011 (1) 1110010011" source="38393" target="38476" cy:directed="1"/>
      <edge id="40700" label="1111010011 (1) 1101010011" source="38393" target="38442" cy:directed="1"/>
      <edge id="40699" label="1111010011 (1) 1011010011" source="38393" target="38410" cy:directed="1"/>
      <edge id="40698" label="1111010101 (1) 1111010111" source="38392" target="38115" cy:directed="1"/>
      <edge id="40697" label="1111010101 (1) 1111011101" source="38392" target="38184" cy:directed="1"/>
      <edge id="40696" label="1111010101 (1) 1111000101" source="38392" target="38579" cy:directed="1"/>
      <edge id="40695" label="1111010101 (1) 1111110101" source="38392" target="38273" cy:directed="1"/>
      <edge id="40694" label="1111010101 (1) 1110010101" source="38392" target="38475" cy:directed="1"/>
      <edge id="40693" label="1111010101 (1) 1101010101" source="38392" target="38441" cy:directed="1"/>
      <edge id="40692" label="1111010101 (1) 1011010101" source="38392" target="38409" cy:directed="1"/>
      <edge id="40691" label="1111011001 (1) 1111011011" source="38391" target="38185" cy:directed="1"/>
      <edge id="40690" label="1111011001 (1) 1111011101" source="38391" target="38184" cy:directed="1"/>
      <edge id="40689" label="1111011001 (1) 1111001001" source="38391" target="38318" cy:directed="1"/>
      <edge id="40688" label="1111011001 (1) 1111111001" source="38391" target="38272" cy:directed="1"/>
      <edge id="40687" label="1111011001 (1) 1110011001" source="38391" target="38474" cy:directed="1"/>
      <edge id="40686" label="1111011001 (1) 1101011001" source="38391" target="38440" cy:directed="1"/>
      <edge id="40685" label="1111011001 (1) 1011011001" source="38391" target="38408" cy:directed="1"/>
      <edge id="40684" label="1110111010 (1) 1110111000" source="38390" target="38865" cy:directed="1"/>
      <edge id="40683" label="1110111010 (1) 1110111110" source="38390" target="38225" cy:directed="1"/>
      <edge id="40682" label="1110111010 (1) 1110110010" source="38390" target="38664" cy:directed="1"/>
      <edge id="40681" label="1110111010 (1) 1110011010" source="38390" target="38767" cy:directed="1"/>
      <edge id="40680" label="1110111010 (1) 1100111010" source="38390" target="38435" cy:directed="1"/>
      <edge id="40679" label="1110111010 (1) 1010111010" source="38390" target="38400" cy:directed="1"/>
      <edge id="40678" label="0110101010 (1) 0110101000" source="38389" target="38804" cy:directed="1"/>
      <edge id="40677" label="0110101010 (1) 0110100010" source="38389" target="38654" cy:directed="1"/>
      <edge id="40676" label="0110101010 (1) 0110111010" source="38389" target="38388" cy:directed="1"/>
      <edge id="40675" label="0110101010 (1) 0110001010" source="38389" target="38872" cy:directed="1"/>
      <edge id="40674" label="0110101010 (1) 0100101010" source="38389" target="38433" cy:directed="1"/>
      <edge id="40673" label="0110101010 (1) 0010101010" source="38389" target="38448" cy:directed="1"/>
      <edge id="40672" label="0110111010 (1) 0110111000" source="38388" target="38862" cy:directed="1"/>
      <edge id="40671" label="0110111010 (1) 0110111110" source="38388" target="38224" cy:directed="1"/>
      <edge id="40670" label="0110111010 (1) 0110110010" source="38388" target="38653" cy:directed="1"/>
      <edge id="40669" label="0110111010 (1) 0110011010" source="38388" target="38764" cy:directed="1"/>
      <edge id="40668" label="0110111010 (1) 0100111010" source="38388" target="38432" cy:directed="1"/>
      <edge id="40667" label="0110111010 (1) 0010111010" source="38388" target="38402" cy:directed="1"/>
      <edge id="40666" label="1010001001 (1) 1010001011" source="38387" target="38386" cy:directed="1"/>
      <edge id="40665" label="1010001001 (1) 1010001101" source="38387" target="38385" cy:directed="1"/>
      <edge id="40664" label="1010001001 (1) 1010000001" source="38387" target="38652" cy:directed="1"/>
      <edge id="40663" label="1010001001 (1) 1000001001" source="38387" target="38431" cy:directed="1"/>
      <edge id="40662" label="1010001001 (1) 1110001001" source="38387" target="38384" cy:directed="1"/>
      <edge id="40661" label="1010001011 (1) 1010001111" source="38386" target="38112" cy:directed="1"/>
      <edge id="40660" label="1010001011 (1) 1010000011" source="38386" target="38651" cy:directed="1"/>
      <edge id="40659" label="1010001011 (1) 1000001011" source="38386" target="38430" cy:directed="1"/>
      <edge id="40658" label="1010001011 (1) 1110001011" source="38386" target="38378" cy:directed="1"/>
      <edge id="40657" label="1010001101 (1) 1010001111" source="38385" target="38112" cy:directed="1"/>
      <edge id="40656" label="1010001101 (1) 1010000101" source="38385" target="38650" cy:directed="1"/>
      <edge id="40655" label="1010001101 (1) 1110001101" source="38385" target="38377" cy:directed="1"/>
      <edge id="40654" label="1110001001 (1) 1110001011" source="38384" target="38378" cy:directed="1"/>
      <edge id="40653" label="1110001001 (1) 1110001101" source="38384" target="38377" cy:directed="1"/>
      <edge id="40652" label="1110001001 (1) 1110000001" source="38384" target="38649" cy:directed="1"/>
      <edge id="40651" label="1110001001 (1) 1100001001" source="38384" target="38427" cy:directed="1"/>
      <edge id="40650" label="0010001001 (1) 0010001011" source="38383" target="38382" cy:directed="1"/>
      <edge id="40649" label="0010001001 (1) 0010001101" source="38383" target="38381" cy:directed="1"/>
      <edge id="40648" label="0010001001 (1) 0010000001" source="38383" target="38648" cy:directed="1"/>
      <edge id="40647" label="0010001001 (1) 0000001001" source="38383" target="38426" cy:directed="1"/>
      <edge id="40646" label="0010001011 (1) 0010001111" source="38382" target="38113" cy:directed="1"/>
      <edge id="40645" label="0010001011 (1) 0010000011" source="38382" target="38647" cy:directed="1"/>
      <edge id="40644" label="0010001011 (1) 0000001011" source="38382" target="38425" cy:directed="1"/>
      <edge id="40643" label="0010001101 (1) 0010001111" source="38381" target="38113" cy:directed="1"/>
      <edge id="40642" label="0010001101 (1) 0010000101" source="38381" target="38646" cy:directed="1"/>
      <edge id="40641" label="1001100110 (1) 1001100100" source="38380" target="38802" cy:directed="1"/>
      <edge id="40640" label="1001100110 (1) 1001100010" source="38380" target="38703" cy:directed="1"/>
      <edge id="40639" label="1001100110 (1) 1001110110" source="38380" target="38266" cy:directed="1"/>
      <edge id="40638" label="1001100110 (1) 1011100110" source="38380" target="38350" cy:directed="1"/>
      <edge id="40637" label="1001100110 (1) 1101100110" source="38380" target="38368" cy:directed="1"/>
      <edge id="40636" label="0001100110 (1) 0001100100" source="38379" target="38799" cy:directed="1"/>
      <edge id="40635" label="0001100110 (1) 0001100010" source="38379" target="38698" cy:directed="1"/>
      <edge id="40634" label="0001100110 (1) 0001110110" source="38379" target="38265" cy:directed="1"/>
      <edge id="40633" label="0001100110 (1) 0011100110" source="38379" target="38349" cy:directed="1"/>
      <edge id="40632" label="1110001011 (1) 1110001111" source="38378" target="38105" cy:directed="1"/>
      <edge id="40631" label="1110001011 (1) 1110000011" source="38378" target="38638" cy:directed="1"/>
      <edge id="40630" label="1110001011 (1) 1100001011" source="38378" target="38420" cy:directed="1"/>
      <edge id="40629" label="1110001101 (1) 1110001111" source="38377" target="38105" cy:directed="1"/>
      <edge id="40628" label="1110001101 (1) 1110000101" source="38377" target="38637" cy:directed="1"/>
      <edge id="40627" label="1110001101 (1) 1100001101" source="38377" target="38419" cy:directed="1"/>
      <edge id="40626" label="1000110101 (1) 1000111101" source="38376" target="38183" cy:directed="1"/>
      <edge id="40625" label="1000110101 (1) 1001110101" source="38376" target="38313" cy:directed="1"/>
      <edge id="40624" label="1000110101 (1) 1010110101" source="38376" target="38354" cy:directed="1"/>
      <edge id="40623" label="1000111001 (1) 1000111101" source="38375" target="38183" cy:directed="1"/>
      <edge id="40622" label="1000111001 (1) 1000011001" source="38375" target="38526" cy:directed="1"/>
      <edge id="40621" label="1000111001 (1) 1001111001" source="38375" target="38312" cy:directed="1"/>
      <edge id="40620" label="1000111001 (1) 1010111001" source="38375" target="38353" cy:directed="1"/>
      <edge id="40619" label="0110001001 (1) 0110001011" source="38374" target="38373" cy:directed="1"/>
      <edge id="40618" label="0110001001 (1) 0110001101" source="38374" target="38372" cy:directed="1"/>
      <edge id="40617" label="0110001001 (1) 0110000001" source="38374" target="38636" cy:directed="1"/>
      <edge id="40616" label="0110001001 (1) 0100001001" source="38374" target="38417" cy:directed="1"/>
      <edge id="40615" label="0110001001 (1) 0010001001" source="38374" target="38383" cy:directed="1"/>
      <edge id="40614" label="0110001011 (1) 0110001111" source="38373" target="38098" cy:directed="1"/>
      <edge id="40613" label="0110001011 (1) 0110000011" source="38373" target="38635" cy:directed="1"/>
      <edge id="40612" label="0110001011 (1) 0100001011" source="38373" target="38416" cy:directed="1"/>
      <edge id="40611" label="0110001011 (1) 0010001011" source="38373" target="38382" cy:directed="1"/>
      <edge id="40610" label="0110001101 (1) 0110001111" source="38372" target="38098" cy:directed="1"/>
      <edge id="40609" label="0110001101 (1) 0110000101" source="38372" target="38634" cy:directed="1"/>
      <edge id="40608" label="0110001101 (1) 0100001101" source="38372" target="38415" cy:directed="1"/>
      <edge id="40607" label="0110001101 (1) 0010001101" source="38372" target="38381" cy:directed="1"/>
      <edge id="40606" label="0000110101 (1) 0000111101" source="38371" target="38182" cy:directed="1"/>
      <edge id="40605" label="0000110101 (1) 0001110101" source="38371" target="38307" cy:directed="1"/>
      <edge id="40604" label="0000110101 (1) 0010110101" source="38371" target="38348" cy:directed="1"/>
      <edge id="40603" label="0000111001 (1) 0000111101" source="38370" target="38182" cy:directed="1"/>
      <edge id="40602" label="0000111001 (1) 0000011001" source="38370" target="38521" cy:directed="1"/>
      <edge id="40601" label="0000111001 (1) 0001111001" source="38370" target="38306" cy:directed="1"/>
      <edge id="40600" label="0000111001 (1) 0010111001" source="38370" target="38347" cy:directed="1"/>
      <edge id="40599" label="1011011110 (1) 1011010110" source="38369" target="38630" cy:directed="1"/>
      <edge id="40598" label="1011011110 (1) 1011001110" source="38369" target="38562" cy:directed="1"/>
      <edge id="40597" label="1011011110 (1) 1010011110" source="38369" target="38465" cy:directed="1"/>
      <edge id="40596" label="1101100110 (1) 1101100100" source="38368" target="38796" cy:directed="1"/>
      <edge id="40595" label="1101100110 (1) 1101100010" source="38368" target="38749" cy:directed="1"/>
      <edge id="40594" label="1101100110 (1) 1101110110" source="38368" target="38261" cy:directed="1"/>
      <edge id="40593" label="0011011110 (1) 0011010110" source="38367" target="38631" cy:directed="1"/>
      <edge id="40592" label="0011011110 (1) 0011001110" source="38367" target="38560" cy:directed="1"/>
      <edge id="40591" label="0011011110 (1) 0010011110" source="38367" target="38462" cy:directed="1"/>
      <edge id="40590" label="0101100110 (1) 0101100100" source="38366" target="38794" cy:directed="1"/>
      <edge id="40589" label="0101100110 (1) 0101100010" source="38366" target="38745" cy:directed="1"/>
      <edge id="40588" label="0101100110 (1) 0101110110" source="38366" target="38260" cy:directed="1"/>
      <edge id="40587" label="0101100110 (1) 0001100110" source="38366" target="38379" cy:directed="1"/>
      <edge id="40586" label="1100110101 (1) 1100111101" source="38365" target="38174" cy:directed="1"/>
      <edge id="40585" label="1100110101 (1) 1101110101" source="38365" target="38301" cy:directed="1"/>
      <edge id="40584" label="1100110101 (1) 1000110101" source="38365" target="38376" cy:directed="1"/>
      <edge id="40583" label="1100111001 (1) 1100111101" source="38364" target="38174" cy:directed="1"/>
      <edge id="40582" label="1100111001 (1) 1100011001" source="38364" target="38508" cy:directed="1"/>
      <edge id="40581" label="1100111001 (1) 1101111001" source="38364" target="38300" cy:directed="1"/>
      <edge id="40580" label="1100111001 (1) 1000111001" source="38364" target="38375" cy:directed="1"/>
      <edge id="40579" label="0100110101 (1) 0100111101" source="38363" target="38178" cy:directed="1"/>
      <edge id="40578" label="0100110101 (1) 0101110101" source="38363" target="38299" cy:directed="1"/>
      <edge id="40577" label="0100110101 (1) 0000110101" source="38363" target="38371" cy:directed="1"/>
      <edge id="40576" label="0100111001 (1) 0100111101" source="38362" target="38178" cy:directed="1"/>
      <edge id="40575" label="0100111001 (1) 0100011001" source="38362" target="38501" cy:directed="1"/>
      <edge id="40574" label="0100111001 (1) 0101111001" source="38362" target="38298" cy:directed="1"/>
      <edge id="40573" label="0100111001 (1) 0000111001" source="38362" target="38370" cy:directed="1"/>
      <edge id="40572" label="0111011110 (1) 0111010110" source="38361" target="38628" cy:directed="1"/>
      <edge id="40571" label="0111011110 (1) 0111001110" source="38361" target="38551" cy:directed="1"/>
      <edge id="40570" label="0111011110 (1) 0111111110" source="38361" target="38195" cy:directed="1"/>
      <edge id="40569" label="0111011110 (1) 0110011110" source="38361" target="38458" cy:directed="1"/>
      <edge id="40568" label="0111011110 (1) 0101011110" source="38361" target="38401" cy:directed="1"/>
      <edge id="40567" label="0111011110 (1) 0011011110" source="38361" target="38367" cy:directed="1"/>
      <edge id="40566" label="1111011110 (1) 1111010110" source="38360" target="38626" cy:directed="1"/>
      <edge id="40565" label="1111011110 (1) 1111001110" source="38360" target="38554" cy:directed="1"/>
      <edge id="40564" label="1111011110 (1) 1111111110" source="38360" target="38198" cy:directed="1"/>
      <edge id="40563" label="1111011110 (1) 1110011110" source="38360" target="38459" cy:directed="1"/>
      <edge id="40562" label="1111011110 (1) 1101011110" source="38360" target="38403" cy:directed="1"/>
      <edge id="40561" label="1111011110 (1) 1011011110" source="38360" target="38369" cy:directed="1"/>
      <edge id="40560" label="0001111010 (1) 0001111000" source="38359" target="38837" cy:directed="1"/>
      <edge id="40559" label="0001111010 (1) 0001111110" source="38359" target="38212" cy:directed="1"/>
      <edge id="40558" label="0001111010 (1) 0001110010" source="38359" target="38620" cy:directed="1"/>
      <edge id="40557" label="0001111010 (1) 0001011010" source="38359" target="38756" cy:directed="1"/>
      <edge id="40556" label="0001111010 (1) 0011111010" source="38359" target="38329" cy:directed="1"/>
      <edge id="40555" label="0011101010 (1) 0011101000" source="38358" target="38789" cy:directed="1"/>
      <edge id="40554" label="0011101010 (1) 0011100010" source="38358" target="38619" cy:directed="1"/>
      <edge id="40553" label="0011101010 (1) 0011111010" source="38358" target="38329" cy:directed="1"/>
      <edge id="40552" label="0011101010 (1) 0011001010" source="38358" target="38844" cy:directed="1"/>
      <edge id="40551" label="0011101010 (1) 0010101010" source="38358" target="38448" cy:directed="1"/>
      <edge id="40550" label="1001111010 (1) 1001111000" source="38357" target="38843" cy:directed="1"/>
      <edge id="40549" label="1001111010 (1) 1001111110" source="38357" target="38213" cy:directed="1"/>
      <edge id="40548" label="1001111010 (1) 1001110010" source="38357" target="38625" cy:directed="1"/>
      <edge id="40547" label="1001111010 (1) 1001011010" source="38357" target="38759" cy:directed="1"/>
      <edge id="40546" label="1001111010 (1) 1011111010" source="38357" target="38328" cy:directed="1"/>
      <edge id="40545" label="1011101010 (1) 1011101000" source="38356" target="38788" cy:directed="1"/>
      <edge id="40544" label="1011101010 (1) 1011100010" source="38356" target="38624" cy:directed="1"/>
      <edge id="40543" label="1011101010 (1) 1011111010" source="38356" target="38328" cy:directed="1"/>
      <edge id="40542" label="1011101010 (1) 1011001010" source="38356" target="38852" cy:directed="1"/>
      <edge id="40541" label="1011101010 (1) 1010101010" source="38356" target="38444" cy:directed="1"/>
      <edge id="40540" label="1011101010 (1) 1111101010" source="38356" target="38463" cy:directed="1"/>
      <edge id="40539" label="1101111010 (1) 1101111000" source="38355" target="38829" cy:directed="1"/>
      <edge id="40538" label="1101111010 (1) 1101111110" source="38355" target="38211" cy:directed="1"/>
      <edge id="40537" label="1101111010 (1) 1101110010" source="38355" target="38617" cy:directed="1"/>
      <edge id="40536" label="1101111010 (1) 1001111010" source="38355" target="38357" cy:directed="1"/>
      <edge id="40535" label="1010110101 (1) 1010111101" source="38354" target="38160" cy:directed="1"/>
      <edge id="40534" label="1010111001 (1) 1010111101" source="38353" target="38160" cy:directed="1"/>
      <edge id="40533" label="1010111001 (1) 1010011001" source="38353" target="38482" cy:directed="1"/>
      <edge id="40532" label="0001001011 (1) 0001001111" source="38352" target="38087" cy:directed="1"/>
      <edge id="40531" label="0001001011 (1) 0001000011" source="38352" target="38615" cy:directed="1"/>
      <edge id="40530" label="0001001101 (1) 0001001111" source="38351" target="38087" cy:directed="1"/>
      <edge id="40529" label="0001001101 (1) 0001000101" source="38351" target="38614" cy:directed="1"/>
      <edge id="40528" label="0001001101 (1) 0011001101" source="38351" target="38322" cy:directed="1"/>
      <edge id="40527" label="1011100110 (1) 1011100100" source="38350" target="38786" cy:directed="1"/>
      <edge id="40526" label="1011100110 (1) 1011100010" source="38350" target="38624" cy:directed="1"/>
      <edge id="40525" label="1011100110 (1) 1011110110" source="38350" target="38252" cy:directed="1"/>
      <edge id="40524" label="1011100110 (1) 1010100110" source="38350" target="38436" cy:directed="1"/>
      <edge id="40523" label="1011100110 (1) 1111100110" source="38350" target="38343" cy:directed="1"/>
      <edge id="40522" label="0011100110 (1) 0011100100" source="38349" target="38781" cy:directed="1"/>
      <edge id="40521" label="0011100110 (1) 0011100010" source="38349" target="38619" cy:directed="1"/>
      <edge id="40520" label="0011100110 (1) 0011110110" source="38349" target="38250" cy:directed="1"/>
      <edge id="40519" label="0011100110 (1) 0010100110" source="38349" target="38434" cy:directed="1"/>
      <edge id="40518" label="0010110101 (1) 0010111101" source="38348" target="38157" cy:directed="1"/>
      <edge id="40517" label="0010111001 (1) 0010111101" source="38347" target="38157" cy:directed="1"/>
      <edge id="40516" label="0010111001 (1) 0010011001" source="38347" target="38488" cy:directed="1"/>
      <edge id="40515" label="0101111010 (1) 0101111000" source="38346" target="38828" cy:directed="1"/>
      <edge id="40514" label="0101111010 (1) 0101111110" source="38346" target="38210" cy:directed="1"/>
      <edge id="40513" label="0101111010 (1) 0101110010" source="38346" target="38608" cy:directed="1"/>
      <edge id="40512" label="0101111010 (1) 0001111010" source="38346" target="38359" cy:directed="1"/>
      <edge id="40511" label="1001001011 (1) 1001001111" source="38345" target="38086" cy:directed="1"/>
      <edge id="40510" label="1001001011 (1) 1001000011" source="38345" target="38613" cy:directed="1"/>
      <edge id="40509" label="1001001011 (1) 1101001011" source="38345" target="38341" cy:directed="1"/>
      <edge id="40508" label="1001001101 (1) 1001001111" source="38344" target="38086" cy:directed="1"/>
      <edge id="40507" label="1001001101 (1) 1001000101" source="38344" target="38612" cy:directed="1"/>
      <edge id="40506" label="1001001101 (1) 1011001101" source="38344" target="38319" cy:directed="1"/>
      <edge id="40505" label="1001001101 (1) 1101001101" source="38344" target="38340" cy:directed="1"/>
      <edge id="40504" label="1111100110 (1) 1111100100" source="38343" target="38777" cy:directed="1"/>
      <edge id="40503" label="1111100110 (1) 1111100010" source="38343" target="38719" cy:directed="1"/>
      <edge id="40502" label="1111100110 (1) 1111110110" source="38343" target="38240" cy:directed="1"/>
      <edge id="40501" label="1111100110 (1) 1110100110" source="38343" target="38422" cy:directed="1"/>
      <edge id="40500" label="1111100110 (1) 1101100110" source="38343" target="38368" cy:directed="1"/>
      <edge id="40499" label="0111100110 (1) 0111100100" source="38342" target="38774" cy:directed="1"/>
      <edge id="40498" label="0111100110 (1) 0111100010" source="38342" target="38715" cy:directed="1"/>
      <edge id="40497" label="0111100110 (1) 0111110110" source="38342" target="38241" cy:directed="1"/>
      <edge id="40496" label="0111100110 (1) 0110100110" source="38342" target="38421" cy:directed="1"/>
      <edge id="40495" label="0111100110 (1) 0101100110" source="38342" target="38366" cy:directed="1"/>
      <edge id="40494" label="0111100110 (1) 0011100110" source="38342" target="38349" cy:directed="1"/>
      <edge id="40493" label="1101001011 (1) 1101001111" source="38341" target="38083" cy:directed="1"/>
      <edge id="40492" label="1101001011 (1) 1101000011" source="38341" target="38605" cy:directed="1"/>
      <edge id="40491" label="1101001011 (1) 1101101011" source="38341" target="38069" cy:directed="1"/>
      <edge id="40490" label="1101001101 (1) 1101001111" source="38340" target="38083" cy:directed="1"/>
      <edge id="40489" label="1101001101 (1) 1101000101" source="38340" target="38604" cy:directed="1"/>
      <edge id="40488" label="1101001101 (1) 1101101101" source="38340" target="38237" cy:directed="1"/>
      <edge id="40487" label="1101101001 (1) 1101101101" source="38339" target="38237" cy:directed="1"/>
      <edge id="40486" label="1101101001 (1) 1101100001" source="38339" target="38603" cy:directed="1"/>
      <edge id="40485" label="1101101001 (1) 1101111001" source="38339" target="38300" cy:directed="1"/>
      <edge id="40484" label="1110110101 (1) 1110111101" source="38338" target="38151" cy:directed="1"/>
      <edge id="40483" label="1110110101 (1) 1100110101" source="38338" target="38365" cy:directed="1"/>
      <edge id="40482" label="1110110101 (1) 1010110101" source="38338" target="38354" cy:directed="1"/>
      <edge id="40481" label="1110111001 (1) 1110111101" source="38337" target="38151" cy:directed="1"/>
      <edge id="40480" label="1110111001 (1) 1110011001" source="38337" target="38474" cy:directed="1"/>
      <edge id="40479" label="1110111001 (1) 1100111001" source="38337" target="38364" cy:directed="1"/>
      <edge id="40478" label="1110111001 (1) 1010111001" source="38337" target="38353" cy:directed="1"/>
      <edge id="40477" label="0101001011 (1) 0101001111" source="38336" target="38082" cy:directed="1"/>
      <edge id="40476" label="0101001011 (1) 0101000011" source="38336" target="38602" cy:directed="1"/>
      <edge id="40475" label="0101001011 (1) 0101101011" source="38336" target="38067" cy:directed="1"/>
      <edge id="40474" label="0101001011 (1) 0001001011" source="38336" target="38352" cy:directed="1"/>
      <edge id="40473" label="0101001101 (1) 0101001111" source="38335" target="38082" cy:directed="1"/>
      <edge id="40472" label="0101001101 (1) 0101000101" source="38335" target="38601" cy:directed="1"/>
      <edge id="40471" label="0101001101 (1) 0101101101" source="38335" target="38232" cy:directed="1"/>
      <edge id="40470" label="0101001101 (1) 0001001101" source="38335" target="38351" cy:directed="1"/>
      <edge id="40469" label="0101101001 (1) 0101101101" source="38334" target="38232" cy:directed="1"/>
      <edge id="40468" label="0101101001 (1) 0101100001" source="38334" target="38600" cy:directed="1"/>
      <edge id="40467" label="0101101001 (1) 0101111001" source="38334" target="38298" cy:directed="1"/>
      <edge id="40466" label="0101101001 (1) 0001101001" source="38334" target="38293" cy:directed="1"/>
      <edge id="40465" label="0110110101 (1) 0110111101" source="38333" target="38150" cy:directed="1"/>
      <edge id="40464" label="0110110101 (1) 0100110101" source="38333" target="38363" cy:directed="1"/>
      <edge id="40463" label="0110110101 (1) 0010110101" source="38333" target="38348" cy:directed="1"/>
      <edge id="40462" label="0110111001 (1) 0110111101" source="38332" target="38150" cy:directed="1"/>
      <edge id="40461" label="0110111001 (1) 0110011001" source="38332" target="38468" cy:directed="1"/>
      <edge id="40460" label="0110111001 (1) 0100111001" source="38332" target="38362" cy:directed="1"/>
      <edge id="40459" label="0110111001 (1) 0010111001" source="38332" target="38347" cy:directed="1"/>
      <edge id="40458" label="1000110110 (1) 1000110100" source="38331" target="38773" cy:directed="1"/>
      <edge id="40457" label="1000110110 (1) 1000110010" source="38331" target="38704" cy:directed="1"/>
      <edge id="40456" label="1000110110 (1) 1001110110" source="38331" target="38266" cy:directed="1"/>
      <edge id="40455" label="1000110110 (1) 1010110110" source="38331" target="38297" cy:directed="1"/>
      <edge id="40454" label="0000110110 (1) 0000110100" source="38330" target="38768" cy:directed="1"/>
      <edge id="40453" label="0000110110 (1) 0000110010" source="38330" target="38699" cy:directed="1"/>
      <edge id="40452" label="0000110110 (1) 0001110110" source="38330" target="38265" cy:directed="1"/>
      <edge id="40451" label="0000110110 (1) 0010110110" source="38330" target="38296" cy:directed="1"/>
      <edge id="40450" label="0011111010 (1) 0011111000" source="38329" target="38811" cy:directed="1"/>
      <edge id="40449" label="0011111010 (1) 0011111110" source="38329" target="38200" cy:directed="1"/>
      <edge id="40448" label="0011111010 (1) 0011110010" source="38329" target="38598" cy:directed="1"/>
      <edge id="40447" label="0011111010 (1) 0011011010" source="38329" target="38743" cy:directed="1"/>
      <edge id="40446" label="0011111010 (1) 0010111010" source="38329" target="38402" cy:directed="1"/>
      <edge id="40445" label="1011111010 (1) 1011111000" source="38328" target="38814" cy:directed="1"/>
      <edge id="40444" label="1011111010 (1) 1011111110" source="38328" target="38201" cy:directed="1"/>
      <edge id="40443" label="1011111010 (1) 1011110010" source="38328" target="38599" cy:directed="1"/>
      <edge id="40442" label="1011111010 (1) 1011011010" source="38328" target="38747" cy:directed="1"/>
      <edge id="40441" label="1011111010 (1) 1010111010" source="38328" target="38400" cy:directed="1"/>
      <edge id="40440" label="1100110110 (1) 1100110100" source="38327" target="38765" cy:directed="1"/>
      <edge id="40439" label="1100110110 (1) 1100110010" source="38327" target="38695" cy:directed="1"/>
      <edge id="40438" label="1100110110 (1) 1101110110" source="38327" target="38261" cy:directed="1"/>
      <edge id="40437" label="1100110110 (1) 1000110110" source="38327" target="38331" cy:directed="1"/>
      <edge id="40436" label="1111111010 (1) 1111111000" source="38326" target="38807" cy:directed="1"/>
      <edge id="40435" label="1111111010 (1) 1111111110" source="38326" target="38198" cy:directed="1"/>
      <edge id="40434" label="1111111010 (1) 1111110010" source="38326" target="38597" cy:directed="1"/>
      <edge id="40433" label="1111111010 (1) 1110111010" source="38326" target="38390" cy:directed="1"/>
      <edge id="40432" label="1111111010 (1) 1101111010" source="38326" target="38355" cy:directed="1"/>
      <edge id="40431" label="1111111010 (1) 1011111010" source="38326" target="38328" cy:directed="1"/>
      <edge id="40430" label="1000000111 (1) 1000100111" source="38325" target="38165" cy:directed="1"/>
      <edge id="40429" label="1000000111 (1) 1001000111" source="38325" target="38258" cy:directed="1"/>
      <edge id="40428" label="1000000111 (1) 1010000111" source="38325" target="38283" cy:directed="1"/>
      <edge id="40427" label="1000000111 (1) 1100000111" source="38325" target="38314" cy:directed="1"/>
      <edge id="40426" label="0011001001 (1) 0011001011" source="38324" target="38323" cy:directed="1"/>
      <edge id="40425" label="0011001001 (1) 0011001101" source="38324" target="38322" cy:directed="1"/>
      <edge id="40424" label="0011001001 (1) 0011000001" source="38324" target="38594" cy:directed="1"/>
      <edge id="40423" label="0011001001 (1) 0010001001" source="38324" target="38383" cy:directed="1"/>
      <edge id="40422" label="0011001001 (1) 0001001001" source="38324" target="38423" cy:directed="1"/>
      <edge id="40421" label="0011001011 (1) 0011001111" source="38323" target="38081" cy:directed="1"/>
      <edge id="40420" label="0011001011 (1) 0011000011" source="38323" target="38593" cy:directed="1"/>
      <edge id="40419" label="0011001011 (1) 0010001011" source="38323" target="38382" cy:directed="1"/>
      <edge id="40418" label="0011001011 (1) 0001001011" source="38323" target="38352" cy:directed="1"/>
      <edge id="40417" label="0011001101 (1) 0011001111" source="38322" target="38081" cy:directed="1"/>
      <edge id="40416" label="0011001101 (1) 0011000101" source="38322" target="38592" cy:directed="1"/>
      <edge id="40415" label="0011001101 (1) 0010001101" source="38322" target="38381" cy:directed="1"/>
      <edge id="40414" label="1011001001 (1) 1011001011" source="38321" target="38320" cy:directed="1"/>
      <edge id="40413" label="1011001001 (1) 1011001101" source="38321" target="38319" cy:directed="1"/>
      <edge id="40412" label="1011001001 (1) 1011000001" source="38321" target="38588" cy:directed="1"/>
      <edge id="40411" label="1011001001 (1) 1010001001" source="38321" target="38387" cy:directed="1"/>
      <edge id="40410" label="1011001001 (1) 1001001001" source="38321" target="38428" cy:directed="1"/>
      <edge id="40409" label="1011001001 (1) 1111001001" source="38321" target="38318" cy:directed="1"/>
      <edge id="40408" label="1011001011 (1) 1011001111" source="38320" target="38080" cy:directed="1"/>
      <edge id="40407" label="1011001011 (1) 1011000011" source="38320" target="38587" cy:directed="1"/>
      <edge id="40406" label="1011001011 (1) 1010001011" source="38320" target="38386" cy:directed="1"/>
      <edge id="40405" label="1011001011 (1) 1001001011" source="38320" target="38345" cy:directed="1"/>
      <edge id="40404" label="1011001011 (1) 1111001011" source="38320" target="38311" cy:directed="1"/>
      <edge id="40403" label="1011001101 (1) 1011001111" source="38319" target="38080" cy:directed="1"/>
      <edge id="40402" label="1011001101 (1) 1011000101" source="38319" target="38586" cy:directed="1"/>
      <edge id="40401" label="1011001101 (1) 1010001101" source="38319" target="38385" cy:directed="1"/>
      <edge id="40400" label="1011001101 (1) 1111001101" source="38319" target="38310" cy:directed="1"/>
      <edge id="40399" label="1111001001 (1) 1111001011" source="38318" target="38311" cy:directed="1"/>
      <edge id="40398" label="1111001001 (1) 1111001101" source="38318" target="38310" cy:directed="1"/>
      <edge id="40397" label="1111001001 (1) 1111000001" source="38318" target="38585" cy:directed="1"/>
      <edge id="40396" label="1111001001 (1) 1111101001" source="38318" target="38309" cy:directed="1"/>
      <edge id="40395" label="1111001001 (1) 1110001001" source="38318" target="38384" cy:directed="1"/>
      <edge id="40394" label="1111001001 (1) 1101001001" source="38318" target="38418" cy:directed="1"/>
      <edge id="40393" label="0100110110 (1) 0100110100" source="38317" target="38762" cy:directed="1"/>
      <edge id="40392" label="0100110110 (1) 0100110010" source="38317" target="38692" cy:directed="1"/>
      <edge id="40391" label="0100110110 (1) 0101110110" source="38317" target="38260" cy:directed="1"/>
      <edge id="40390" label="0100110110 (1) 0000110110" source="38317" target="38330" cy:directed="1"/>
      <edge id="40389" label="0111111010 (1) 0111111000" source="38316" target="38806" cy:directed="1"/>
      <edge id="40388" label="0111111010 (1) 0111111110" source="38316" target="38195" cy:directed="1"/>
      <edge id="40387" label="0111111010 (1) 0111110010" source="38316" target="38589" cy:directed="1"/>
      <edge id="40386" label="0111111010 (1) 0110111010" source="38316" target="38388" cy:directed="1"/>
      <edge id="40385" label="0111111010 (1) 0101111010" source="38316" target="38346" cy:directed="1"/>
      <edge id="40384" label="0111111010 (1) 0011111010" source="38316" target="38329" cy:directed="1"/>
      <edge id="40383" label="0000000111 (1) 0000100111" source="38315" target="38170" cy:directed="1"/>
      <edge id="40382" label="0000000111 (1) 0001000111" source="38315" target="38259" cy:directed="1"/>
      <edge id="40381" label="0000000111 (1) 0010000111" source="38315" target="38284" cy:directed="1"/>
      <edge id="40380" label="1100000111 (1) 1100100111" source="38314" target="38159" cy:directed="1"/>
      <edge id="40379" label="1100000111 (1) 1101000111" source="38314" target="38257" cy:directed="1"/>
      <edge id="40378" label="1001110101 (1) 1001111101" source="38313" target="38124" cy:directed="1"/>
      <edge id="40377" label="1001110101 (1) 1011110101" source="38313" target="38278" cy:directed="1"/>
      <edge id="40376" label="1001111001 (1) 1001111101" source="38312" target="38124" cy:directed="1"/>
      <edge id="40375" label="1001111001 (1) 1001011001" source="38312" target="38455" cy:directed="1"/>
      <edge id="40374" label="1001111001 (1) 1011111001" source="38312" target="38277" cy:directed="1"/>
      <edge id="40373" label="1111001011 (1) 1111001111" source="38311" target="38079" cy:directed="1"/>
      <edge id="40372" label="1111001011 (1) 1111000011" source="38311" target="38580" cy:directed="1"/>
      <edge id="40371" label="1111001011 (1) 1111101011" source="38311" target="38058" cy:directed="1"/>
      <edge id="40370" label="1111001011 (1) 1110001011" source="38311" target="38378" cy:directed="1"/>
      <edge id="40369" label="1111001011 (1) 1101001011" source="38311" target="38341" cy:directed="1"/>
      <edge id="40368" label="1111001101 (1) 1111001111" source="38310" target="38079" cy:directed="1"/>
      <edge id="40367" label="1111001101 (1) 1111000101" source="38310" target="38579" cy:directed="1"/>
      <edge id="40366" label="1111001101 (1) 1111101101" source="38310" target="38217" cy:directed="1"/>
      <edge id="40365" label="1111001101 (1) 1110001101" source="38310" target="38377" cy:directed="1"/>
      <edge id="40364" label="1111001101 (1) 1101001101" source="38310" target="38340" cy:directed="1"/>
      <edge id="40363" label="1111101001 (1) 1111101101" source="38309" target="38217" cy:directed="1"/>
      <edge id="40362" label="1111101001 (1) 1111100001" source="38309" target="38578" cy:directed="1"/>
      <edge id="40361" label="1111101001 (1) 1111111001" source="38309" target="38272" cy:directed="1"/>
      <edge id="40360" label="1111101001 (1) 1110101001" source="38309" target="38267" cy:directed="1"/>
      <edge id="40359" label="1111101001 (1) 1101101001" source="38309" target="38339" cy:directed="1"/>
      <edge id="40358" label="0100000111 (1) 0100100111" source="38308" target="38155" cy:directed="1"/>
      <edge id="40357" label="0100000111 (1) 0101000111" source="38308" target="38256" cy:directed="1"/>
      <edge id="40356" label="0100000111 (1) 0000000111" source="38308" target="38315" cy:directed="1"/>
      <edge id="40355" label="0001110101 (1) 0001111101" source="38307" target="38122" cy:directed="1"/>
      <edge id="40354" label="0001110101 (1) 0011110101" source="38307" target="38276" cy:directed="1"/>
      <edge id="40353" label="0001111001 (1) 0001111101" source="38306" target="38122" cy:directed="1"/>
      <edge id="40352" label="0001111001 (1) 0001011001" source="38306" target="38452" cy:directed="1"/>
      <edge id="40351" label="0001111001 (1) 0011111001" source="38306" target="38275" cy:directed="1"/>
      <edge id="40350" label="0111001001 (1) 0111001011" source="38305" target="38304" cy:directed="1"/>
      <edge id="40349" label="0111001001 (1) 0111001101" source="38305" target="38303" cy:directed="1"/>
      <edge id="40348" label="0111001001 (1) 0111000001" source="38305" target="38577" cy:directed="1"/>
      <edge id="40347" label="0111001001 (1) 0111101001" source="38305" target="38302" cy:directed="1"/>
      <edge id="40346" label="0111001001 (1) 0110001001" source="38305" target="38374" cy:directed="1"/>
      <edge id="40345" label="0111001001 (1) 0101001001" source="38305" target="38414" cy:directed="1"/>
      <edge id="40344" label="0111001001 (1) 0011001001" source="38305" target="38324" cy:directed="1"/>
      <edge id="40343" label="0111001011 (1) 0111001111" source="38304" target="38078" cy:directed="1"/>
      <edge id="40342" label="0111001011 (1) 0111000011" source="38304" target="38576" cy:directed="1"/>
      <edge id="40341" label="0111001011 (1) 0111101011" source="38304" target="38060" cy:directed="1"/>
      <edge id="40340" label="0111001011 (1) 0110001011" source="38304" target="38373" cy:directed="1"/>
      <edge id="40339" label="0111001011 (1) 0101001011" source="38304" target="38336" cy:directed="1"/>
      <edge id="40338" label="0111001011 (1) 0011001011" source="38304" target="38323" cy:directed="1"/>
      <edge id="40337" label="0111001101 (1) 0111001111" source="38303" target="38078" cy:directed="1"/>
      <edge id="40336" label="0111001101 (1) 0111000101" source="38303" target="38575" cy:directed="1"/>
      <edge id="40335" label="0111001101 (1) 0111101101" source="38303" target="38214" cy:directed="1"/>
      <edge id="40334" label="0111001101 (1) 0110001101" source="38303" target="38372" cy:directed="1"/>
      <edge id="40333" label="0111001101 (1) 0101001101" source="38303" target="38335" cy:directed="1"/>
      <edge id="40332" label="0111001101 (1) 0011001101" source="38303" target="38322" cy:directed="1"/>
      <edge id="40331" label="0111101001 (1) 0111101101" source="38302" target="38214" cy:directed="1"/>
      <edge id="40330" label="0111101001 (1) 0111100001" source="38302" target="38574" cy:directed="1"/>
      <edge id="40329" label="0111101001 (1) 0111111001" source="38302" target="38270" cy:directed="1"/>
      <edge id="40328" label="0111101001 (1) 0110101001" source="38302" target="38263" cy:directed="1"/>
      <edge id="40327" label="0111101001 (1) 0101101001" source="38302" target="38334" cy:directed="1"/>
      <edge id="40326" label="0111101001 (1) 0011101001" source="38302" target="38242" cy:directed="1"/>
      <edge id="40325" label="1101110101 (1) 1101111101" source="38301" target="38121" cy:directed="1"/>
      <edge id="40324" label="1101110101 (1) 1001110101" source="38301" target="38313" cy:directed="1"/>
      <edge id="40323" label="1101111001 (1) 1101111101" source="38300" target="38121" cy:directed="1"/>
      <edge id="40322" label="1101111001 (1) 1001111001" source="38300" target="38312" cy:directed="1"/>
      <edge id="40321" label="0101110101 (1) 0101111101" source="38299" target="38119" cy:directed="1"/>
      <edge id="40320" label="0101110101 (1) 0001110101" source="38299" target="38307" cy:directed="1"/>
      <edge id="40319" label="0101111001 (1) 0101111101" source="38298" target="38119" cy:directed="1"/>
      <edge id="40318" label="0101111001 (1) 0001111001" source="38298" target="38306" cy:directed="1"/>
      <edge id="40317" label="1010110110 (1) 1010110100" source="38297" target="38761" cy:directed="1"/>
      <edge id="40316" label="1010110110 (1) 1010110010" source="38297" target="38669" cy:directed="1"/>
      <edge id="40315" label="0010110110 (1) 0010110100" source="38296" target="38760" cy:directed="1"/>
      <edge id="40314" label="0010110110 (1) 0010110010" source="38296" target="38667" cy:directed="1"/>
      <edge id="40313" label="0000101001 (1) 0000101101" source="38295" target="38294" cy:directed="1"/>
      <edge id="40312" label="0000101001 (1) 0000100001" source="38295" target="38573" cy:directed="1"/>
      <edge id="40311" label="0000101001 (1) 0000111001" source="38295" target="38370" cy:directed="1"/>
      <edge id="40310" label="0000101001 (1) 0000001001" source="38295" target="38426" cy:directed="1"/>
      <edge id="40309" label="0000101001 (1) 0001101001" source="38295" target="38293" cy:directed="1"/>
      <edge id="40308" label="0000101001 (1) 0010101001" source="38295" target="38292" cy:directed="1"/>
      <edge id="40307" label="0000101101 (1) 0000100101" source="38294" target="38572" cy:directed="1"/>
      <edge id="40306" label="0000101101 (1) 0000111101" source="38294" target="38182" cy:directed="1"/>
      <edge id="40305" label="0000101101 (1) 0000001101" source="38294" target="38424" cy:directed="1"/>
      <edge id="40304" label="0000101101 (1) 0001101101" source="38294" target="38243" cy:directed="1"/>
      <edge id="40303" label="0000101101 (1) 0010101101" source="38294" target="38269" cy:directed="1"/>
      <edge id="40302" label="0001101001 (1) 0001101101" source="38293" target="38243" cy:directed="1"/>
      <edge id="40301" label="0001101001 (1) 0001100001" source="38293" target="38570" cy:directed="1"/>
      <edge id="40300" label="0001101001 (1) 0001111001" source="38293" target="38306" cy:directed="1"/>
      <edge id="40299" label="0001101001 (1) 0001001001" source="38293" target="38423" cy:directed="1"/>
      <edge id="40298" label="0001101001 (1) 0011101001" source="38293" target="38242" cy:directed="1"/>
      <edge id="40297" label="0010101001 (1) 0010101101" source="38292" target="38269" cy:directed="1"/>
      <edge id="40296" label="0010101001 (1) 0010100001" source="38292" target="38569" cy:directed="1"/>
      <edge id="40295" label="0010101001 (1) 0010111001" source="38292" target="38347" cy:directed="1"/>
      <edge id="40294" label="0010101001 (1) 0010001001" source="38292" target="38383" cy:directed="1"/>
      <edge id="40293" label="1000101001 (1) 1000101101" source="38291" target="38290" cy:directed="1"/>
      <edge id="40292" label="1000101001 (1) 1000100001" source="38291" target="38568" cy:directed="1"/>
      <edge id="40291" label="1000101001 (1) 1000111001" source="38291" target="38375" cy:directed="1"/>
      <edge id="40290" label="1000101001 (1) 1000001001" source="38291" target="38431" cy:directed="1"/>
      <edge id="40289" label="1000101001 (1) 1001101001" source="38291" target="38289" cy:directed="1"/>
      <edge id="40288" label="1000101001 (1) 1010101001" source="38291" target="38288" cy:directed="1"/>
      <edge id="40287" label="1000101001 (1) 1100101001" source="38291" target="38287" cy:directed="1"/>
      <edge id="40286" label="1000101101 (1) 1000100101" source="38290" target="38567" cy:directed="1"/>
      <edge id="40285" label="1000101101 (1) 1000111101" source="38290" target="38183" cy:directed="1"/>
      <edge id="40284" label="1000101101 (1) 1000001101" source="38290" target="38429" cy:directed="1"/>
      <edge id="40283" label="1000101101 (1) 1001101101" source="38290" target="38245" cy:directed="1"/>
      <edge id="40282" label="1000101101 (1) 1010101101" source="38290" target="38268" cy:directed="1"/>
      <edge id="40281" label="1000101101 (1) 1100101101" source="38290" target="38282" cy:directed="1"/>
      <edge id="40280" label="1001101001 (1) 1001101101" source="38289" target="38245" cy:directed="1"/>
      <edge id="40279" label="1001101001 (1) 1001100001" source="38289" target="38565" cy:directed="1"/>
      <edge id="40278" label="1001101001 (1) 1001111001" source="38289" target="38312" cy:directed="1"/>
      <edge id="40277" label="1001101001 (1) 1001001001" source="38289" target="38428" cy:directed="1"/>
      <edge id="40276" label="1001101001 (1) 1011101001" source="38289" target="38244" cy:directed="1"/>
      <edge id="40275" label="1001101001 (1) 1101101001" source="38289" target="38339" cy:directed="1"/>
      <edge id="40274" label="1010101001 (1) 1010101101" source="38288" target="38268" cy:directed="1"/>
      <edge id="40273" label="1010101001 (1) 1010100001" source="38288" target="38564" cy:directed="1"/>
      <edge id="40272" label="1010101001 (1) 1010111001" source="38288" target="38353" cy:directed="1"/>
      <edge id="40271" label="1010101001 (1) 1010001001" source="38288" target="38387" cy:directed="1"/>
      <edge id="40270" label="1010101001 (1) 1110101001" source="38288" target="38267" cy:directed="1"/>
      <edge id="40269" label="1100101001 (1) 1100101101" source="38287" target="38282" cy:directed="1"/>
      <edge id="40268" label="1100101001 (1) 1100100001" source="38287" target="38563" cy:directed="1"/>
      <edge id="40267" label="1100101001 (1) 1100111001" source="38287" target="38364" cy:directed="1"/>
      <edge id="40266" label="1100101001 (1) 1100001001" source="38287" target="38427" cy:directed="1"/>
      <edge id="40265" label="1100101001 (1) 1101101001" source="38287" target="38339" cy:directed="1"/>
      <edge id="40264" label="1110110110 (1) 1110110100" source="38286" target="38757" cy:directed="1"/>
      <edge id="40263" label="1110110110 (1) 1110110010" source="38286" target="38664" cy:directed="1"/>
      <edge id="40262" label="1110110110 (1) 1100110110" source="38286" target="38327" cy:directed="1"/>
      <edge id="40261" label="1110110110 (1) 1010110110" source="38286" target="38297" cy:directed="1"/>
      <edge id="40260" label="0110110110 (1) 0110110100" source="38285" target="38754" cy:directed="1"/>
      <edge id="40259" label="0110110110 (1) 0110110010" source="38285" target="38653" cy:directed="1"/>
      <edge id="40258" label="0110110110 (1) 0100110110" source="38285" target="38317" cy:directed="1"/>
      <edge id="40257" label="0110110110 (1) 0010110110" source="38285" target="38296" cy:directed="1"/>
      <edge id="40256" label="0010000111 (1) 0010100111" source="38284" target="38139" cy:directed="1"/>
      <edge id="40255" label="1010000111 (1) 1010100111" source="38283" target="38136" cy:directed="1"/>
      <edge id="40254" label="1010000111 (1) 1110000111" source="38283" target="38279" cy:directed="1"/>
      <edge id="40253" label="1100101101 (1) 1100100101" source="38282" target="38559" cy:directed="1"/>
      <edge id="40252" label="1100101101 (1) 1100111101" source="38282" target="38174" cy:directed="1"/>
      <edge id="40251" label="1100101101 (1) 1100001101" source="38282" target="38419" cy:directed="1"/>
      <edge id="40250" label="1100101101 (1) 1101101101" source="38282" target="38237" cy:directed="1"/>
      <edge id="40249" label="0100101001 (1) 0100101101" source="38281" target="38280" cy:directed="1"/>
      <edge id="40248" label="0100101001 (1) 0100100001" source="38281" target="38557" cy:directed="1"/>
      <edge id="40247" label="0100101001 (1) 0100111001" source="38281" target="38362" cy:directed="1"/>
      <edge id="40246" label="0100101001 (1) 0100001001" source="38281" target="38417" cy:directed="1"/>
      <edge id="40245" label="0100101001 (1) 0101101001" source="38281" target="38334" cy:directed="1"/>
      <edge id="40244" label="0100101001 (1) 0000101001" source="38281" target="38295" cy:directed="1"/>
      <edge id="40243" label="0100101101 (1) 0100100101" source="38280" target="38556" cy:directed="1"/>
      <edge id="40242" label="0100101101 (1) 0100111101" source="38280" target="38178" cy:directed="1"/>
      <edge id="40241" label="0100101101 (1) 0100001101" source="38280" target="38415" cy:directed="1"/>
      <edge id="40240" label="0100101101 (1) 0101101101" source="38280" target="38232" cy:directed="1"/>
      <edge id="40239" label="0100101101 (1) 0000101101" source="38280" target="38294" cy:directed="1"/>
      <edge id="40238" label="1110000111 (1) 1110100111" source="38279" target="38130" cy:directed="1"/>
      <edge id="40237" label="1110000111 (1) 1100000111" source="38279" target="38314" cy:directed="1"/>
      <edge id="40236" label="1011110101 (1) 1011111101" source="38278" target="38102" cy:directed="1"/>
      <edge id="40235" label="1011110101 (1) 1010110101" source="38278" target="38354" cy:directed="1"/>
      <edge id="40234" label="1011111001 (1) 1011111101" source="38277" target="38102" cy:directed="1"/>
      <edge id="40233" label="1011111001 (1) 1011011001" source="38277" target="38408" cy:directed="1"/>
      <edge id="40232" label="1011111001 (1) 1010111001" source="38277" target="38353" cy:directed="1"/>
      <edge id="40231" label="0011110101 (1) 0011111101" source="38276" target="38099" cy:directed="1"/>
      <edge id="40230" label="0011110101 (1) 0010110101" source="38276" target="38348" cy:directed="1"/>
      <edge id="40229" label="0011111001 (1) 0011111101" source="38275" target="38099" cy:directed="1"/>
      <edge id="40228" label="0011111001 (1) 0011011001" source="38275" target="38404" cy:directed="1"/>
      <edge id="40227" label="0011111001 (1) 0010111001" source="38275" target="38347" cy:directed="1"/>
      <edge id="40226" label="0110000111 (1) 0110100111" source="38274" target="38127" cy:directed="1"/>
      <edge id="40225" label="0110000111 (1) 0100000111" source="38274" target="38308" cy:directed="1"/>
      <edge id="40224" label="0110000111 (1) 0010000111" source="38274" target="38284" cy:directed="1"/>
      <edge id="40223" label="1111110101 (1) 1111111101" source="38273" target="38097" cy:directed="1"/>
      <edge id="40222" label="1111110101 (1) 1110110101" source="38273" target="38338" cy:directed="1"/>
      <edge id="40221" label="1111110101 (1) 1101110101" source="38273" target="38301" cy:directed="1"/>
      <edge id="40220" label="1111110101 (1) 1011110101" source="38273" target="38278" cy:directed="1"/>
      <edge id="40219" label="1111111001 (1) 1111111101" source="38272" target="38097" cy:directed="1"/>
      <edge id="40218" label="1111111001 (1) 1110111001" source="38272" target="38337" cy:directed="1"/>
      <edge id="40217" label="1111111001 (1) 1101111001" source="38272" target="38300" cy:directed="1"/>
      <edge id="40216" label="1111111001 (1) 1011111001" source="38272" target="38277" cy:directed="1"/>
      <edge id="40215" label="0111110101 (1) 0111111101" source="38271" target="38096" cy:directed="1"/>
      <edge id="40214" label="0111110101 (1) 0110110101" source="38271" target="38333" cy:directed="1"/>
      <edge id="40213" label="0111110101 (1) 0101110101" source="38271" target="38299" cy:directed="1"/>
      <edge id="40212" label="0111110101 (1) 0011110101" source="38271" target="38276" cy:directed="1"/>
      <edge id="40211" label="0111111001 (1) 0111111101" source="38270" target="38096" cy:directed="1"/>
      <edge id="40210" label="0111111001 (1) 0110111001" source="38270" target="38332" cy:directed="1"/>
      <edge id="40209" label="0111111001 (1) 0101111001" source="38270" target="38298" cy:directed="1"/>
      <edge id="40208" label="0111111001 (1) 0011111001" source="38270" target="38275" cy:directed="1"/>
      <edge id="40207" label="0010101101 (1) 0010100101" source="38269" target="38542" cy:directed="1"/>
      <edge id="40206" label="0010101101 (1) 0010111101" source="38269" target="38157" cy:directed="1"/>
      <edge id="40205" label="0010101101 (1) 0010001101" source="38269" target="38381" cy:directed="1"/>
      <edge id="40204" label="1010101101 (1) 1010100101" source="38268" target="38540" cy:directed="1"/>
      <edge id="40203" label="1010101101 (1) 1010111101" source="38268" target="38160" cy:directed="1"/>
      <edge id="40202" label="1010101101 (1) 1010001101" source="38268" target="38385" cy:directed="1"/>
      <edge id="40201" label="1010101101 (1) 1110101101" source="38268" target="38264" cy:directed="1"/>
      <edge id="40200" label="1110101001 (1) 1110101101" source="38267" target="38264" cy:directed="1"/>
      <edge id="40199" label="1110101001 (1) 1110100001" source="38267" target="38538" cy:directed="1"/>
      <edge id="40198" label="1110101001 (1) 1110111001" source="38267" target="38337" cy:directed="1"/>
      <edge id="40197" label="1110101001 (1) 1110001001" source="38267" target="38384" cy:directed="1"/>
      <edge id="40196" label="1110101001 (1) 1100101001" source="38267" target="38287" cy:directed="1"/>
      <edge id="40195" label="1001110110 (1) 1001110100" source="38266" target="38748" cy:directed="1"/>
      <edge id="40194" label="1001110110 (1) 1001110010" source="38266" target="38625" cy:directed="1"/>
      <edge id="40193" label="1001110110 (1) 1011110110" source="38266" target="38252" cy:directed="1"/>
      <edge id="40192" label="0001110110 (1) 0001110100" source="38265" target="38744" cy:directed="1"/>
      <edge id="40191" label="0001110110 (1) 0001110010" source="38265" target="38620" cy:directed="1"/>
      <edge id="40190" label="0001110110 (1) 0011110110" source="38265" target="38250" cy:directed="1"/>
      <edge id="40189" label="1110101101 (1) 1110100101" source="38264" target="38536" cy:directed="1"/>
      <edge id="40188" label="1110101101 (1) 1110111101" source="38264" target="38151" cy:directed="1"/>
      <edge id="40187" label="1110101101 (1) 1110001101" source="38264" target="38377" cy:directed="1"/>
      <edge id="40186" label="1110101101 (1) 1100101101" source="38264" target="38282" cy:directed="1"/>
      <edge id="40185" label="0110101001 (1) 0110101101" source="38263" target="38262" cy:directed="1"/>
      <edge id="40184" label="0110101001 (1) 0110100001" source="38263" target="38534" cy:directed="1"/>
      <edge id="40183" label="0110101001 (1) 0110111001" source="38263" target="38332" cy:directed="1"/>
      <edge id="40182" label="0110101001 (1) 0110001001" source="38263" target="38374" cy:directed="1"/>
      <edge id="40181" label="0110101001 (1) 0100101001" source="38263" target="38281" cy:directed="1"/>
      <edge id="40180" label="0110101001 (1) 0010101001" source="38263" target="38292" cy:directed="1"/>
      <edge id="40179" label="0110101101 (1) 0110100101" source="38262" target="38533" cy:directed="1"/>
      <edge id="40178" label="0110101101 (1) 0110111101" source="38262" target="38150" cy:directed="1"/>
      <edge id="40177" label="0110101101 (1) 0110001101" source="38262" target="38372" cy:directed="1"/>
      <edge id="40176" label="0110101101 (1) 0100101101" source="38262" target="38280" cy:directed="1"/>
      <edge id="40175" label="0110101101 (1) 0010101101" source="38262" target="38269" cy:directed="1"/>
      <edge id="40174" label="1101110110 (1) 1101110100" source="38261" target="38733" cy:directed="1"/>
      <edge id="40173" label="1101110110 (1) 1101110010" source="38261" target="38617" cy:directed="1"/>
      <edge id="40172" label="1101110110 (1) 1001110110" source="38261" target="38266" cy:directed="1"/>
      <edge id="40171" label="0101110110 (1) 0101110100" source="38260" target="38732" cy:directed="1"/>
      <edge id="40170" label="0101110110 (1) 0101110010" source="38260" target="38608" cy:directed="1"/>
      <edge id="40169" label="0101110110 (1) 0001110110" source="38260" target="38265" cy:directed="1"/>
      <edge id="40168" label="0001000111 (1) 0001100111" source="38259" target="38111" cy:directed="1"/>
      <edge id="40167" label="0001000111 (1) 0011000111" source="38259" target="38239" cy:directed="1"/>
      <edge id="40166" label="1001000111 (1) 1001100111" source="38258" target="38108" cy:directed="1"/>
      <edge id="40165" label="1001000111 (1) 1011000111" source="38258" target="38238" cy:directed="1"/>
      <edge id="40164" label="1001000111 (1) 1101000111" source="38258" target="38257" cy:directed="1"/>
      <edge id="40163" label="1101000111 (1) 1101100111" source="38257" target="38104" cy:directed="1"/>
      <edge id="40162" label="0101000111 (1) 0101100111" source="38256" target="38101" cy:directed="1"/>
      <edge id="40161" label="0101000111 (1) 0001000111" source="38256" target="38259" cy:directed="1"/>
      <edge id="40160" label="1000111110 (1) 1000111100" source="38255" target="38721" cy:directed="1"/>
      <edge id="40159" label="1000111110 (1) 1000110110" source="38255" target="38331" cy:directed="1"/>
      <edge id="40158" label="1000111110 (1) 1000011110" source="38255" target="38498" cy:directed="1"/>
      <edge id="40157" label="1000111110 (1) 1001111110" source="38255" target="38213" cy:directed="1"/>
      <edge id="40156" label="1000111110 (1) 1010111110" source="38255" target="38229" cy:directed="1"/>
      <edge id="40155" label="0000111110 (1) 0000111100" source="38254" target="38720" cy:directed="1"/>
      <edge id="40154" label="0000111110 (1) 0000110110" source="38254" target="38330" cy:directed="1"/>
      <edge id="40153" label="0000111110 (1) 0000011110" source="38254" target="38497" cy:directed="1"/>
      <edge id="40152" label="0000111110 (1) 0001111110" source="38254" target="38212" cy:directed="1"/>
      <edge id="40151" label="0000111110 (1) 0010111110" source="38254" target="38228" cy:directed="1"/>
      <edge id="40150" label="0100111110 (1) 0100111100" source="38253" target="38714" cy:directed="1"/>
      <edge id="40149" label="0100111110 (1) 0100110110" source="38253" target="38317" cy:directed="1"/>
      <edge id="40148" label="0100111110 (1) 0100011110" source="38253" target="38480" cy:directed="1"/>
      <edge id="40147" label="0100111110 (1) 0101111110" source="38253" target="38210" cy:directed="1"/>
      <edge id="40146" label="0100111110 (1) 0000111110" source="38253" target="38254" cy:directed="1"/>
      <edge id="40145" label="1011110110 (1) 1011110100" source="38252" target="38717" cy:directed="1"/>
      <edge id="40144" label="1011110110 (1) 1011110010" source="38252" target="38599" cy:directed="1"/>
      <edge id="40143" label="1011110110 (1) 1010110110" source="38252" target="38297" cy:directed="1"/>
      <edge id="40142" label="1100111110 (1) 1100111100" source="38251" target="38718" cy:directed="1"/>
      <edge id="40141" label="1100111110 (1) 1100110110" source="38251" target="38327" cy:directed="1"/>
      <edge id="40140" label="1100111110 (1) 1100011110" source="38251" target="38481" cy:directed="1"/>
      <edge id="40139" label="1100111110 (1) 1101111110" source="38251" target="38211" cy:directed="1"/>
      <edge id="40138" label="1100111110 (1) 1000111110" source="38251" target="38255" cy:directed="1"/>
      <edge id="40137" label="0011110110 (1) 0011110100" source="38250" target="38716" cy:directed="1"/>
      <edge id="40136" label="0011110110 (1) 0011110010" source="38250" target="38598" cy:directed="1"/>
      <edge id="40135" label="0011110110 (1) 0010110110" source="38250" target="38296" cy:directed="1"/>
      <edge id="40134" label="1000011011 (1) 1000011111" source="38249" target="38070" cy:directed="1"/>
      <edge id="40133" label="1000011011 (1) 1000010011" source="38249" target="38528" cy:directed="1"/>
      <edge id="40132" label="1000011011 (1) 1000001011" source="38249" target="38430" cy:directed="1"/>
      <edge id="40131" label="1000011011 (1) 1001011011" source="38249" target="38209" cy:directed="1"/>
      <edge id="40130" label="1000011101 (1) 1000011111" source="38248" target="38070" cy:directed="1"/>
      <edge id="40129" label="1000011101 (1) 1000001101" source="38248" target="38429" cy:directed="1"/>
      <edge id="40128" label="1000011101 (1) 1001011101" source="38248" target="38208" cy:directed="1"/>
      <edge id="40127" label="1000011101 (1) 1010011101" source="38248" target="38222" cy:directed="1"/>
      <edge id="40126" label="0000011011 (1) 0000011111" source="38247" target="38071" cy:directed="1"/>
      <edge id="40125" label="0000011011 (1) 0000010011" source="38247" target="38523" cy:directed="1"/>
      <edge id="40124" label="0000011011 (1) 0000001011" source="38247" target="38425" cy:directed="1"/>
      <edge id="40123" label="0000011011 (1) 0001011011" source="38247" target="38207" cy:directed="1"/>
      <edge id="40122" label="0000011101 (1) 0000011111" source="38246" target="38071" cy:directed="1"/>
      <edge id="40121" label="0000011101 (1) 0000001101" source="38246" target="38424" cy:directed="1"/>
      <edge id="40120" label="0000011101 (1) 0001011101" source="38246" target="38206" cy:directed="1"/>
      <edge id="40119" label="0000011101 (1) 0010011101" source="38246" target="38226" cy:directed="1"/>
      <edge id="40118" label="1001101101 (1) 1001100101" source="38245" target="38516" cy:directed="1"/>
      <edge id="40117" label="1001101101 (1) 1001111101" source="38245" target="38124" cy:directed="1"/>
      <edge id="40116" label="1001101101 (1) 1001001101" source="38245" target="38344" cy:directed="1"/>
      <edge id="40115" label="1001101101 (1) 1011101101" source="38245" target="38220" cy:directed="1"/>
      <edge id="40114" label="1001101101 (1) 1101101101" source="38245" target="38237" cy:directed="1"/>
      <edge id="40113" label="1011101001 (1) 1011101101" source="38244" target="38220" cy:directed="1"/>
      <edge id="40112" label="1011101001 (1) 1011100001" source="38244" target="38514" cy:directed="1"/>
      <edge id="40111" label="1011101001 (1) 1011111001" source="38244" target="38277" cy:directed="1"/>
      <edge id="40110" label="1011101001 (1) 1011001001" source="38244" target="38321" cy:directed="1"/>
      <edge id="40109" label="1011101001 (1) 1010101001" source="38244" target="38288" cy:directed="1"/>
      <edge id="40108" label="1011101001 (1) 1111101001" source="38244" target="38309" cy:directed="1"/>
      <edge id="40107" label="0001101101 (1) 0001100101" source="38243" target="38519" cy:directed="1"/>
      <edge id="40106" label="0001101101 (1) 0001111101" source="38243" target="38122" cy:directed="1"/>
      <edge id="40105" label="0001101101 (1) 0001001101" source="38243" target="38351" cy:directed="1"/>
      <edge id="40104" label="0001101101 (1) 0011101101" source="38243" target="38221" cy:directed="1"/>
      <edge id="40103" label="0011101001 (1) 0011101101" source="38242" target="38221" cy:directed="1"/>
      <edge id="40102" label="0011101001 (1) 0011100001" source="38242" target="38517" cy:directed="1"/>
      <edge id="40101" label="0011101001 (1) 0011111001" source="38242" target="38275" cy:directed="1"/>
      <edge id="40100" label="0011101001 (1) 0011001001" source="38242" target="38324" cy:directed="1"/>
      <edge id="40099" label="0011101001 (1) 0010101001" source="38242" target="38292" cy:directed="1"/>
      <edge id="40098" label="0111110110 (1) 0111110100" source="38241" target="38710" cy:directed="1"/>
      <edge id="40097" label="0111110110 (1) 0111110010" source="38241" target="38589" cy:directed="1"/>
      <edge id="40096" label="0111110110 (1) 0110110110" source="38241" target="38285" cy:directed="1"/>
      <edge id="40095" label="0111110110 (1) 0101110110" source="38241" target="38260" cy:directed="1"/>
      <edge id="40094" label="0111110110 (1) 0011110110" source="38241" target="38250" cy:directed="1"/>
      <edge id="40093" label="1111110110 (1) 1111110100" source="38240" target="38711" cy:directed="1"/>
      <edge id="40092" label="1111110110 (1) 1111110010" source="38240" target="38597" cy:directed="1"/>
      <edge id="40091" label="1111110110 (1) 1110110110" source="38240" target="38286" cy:directed="1"/>
      <edge id="40090" label="1111110110 (1) 1101110110" source="38240" target="38261" cy:directed="1"/>
      <edge id="40089" label="1111110110 (1) 1011110110" source="38240" target="38252" cy:directed="1"/>
      <edge id="40088" label="0011000111 (1) 0011100111" source="38239" target="38093" cy:directed="1"/>
      <edge id="40087" label="0011000111 (1) 0010000111" source="38239" target="38284" cy:directed="1"/>
      <edge id="40086" label="1011000111 (1) 1011100111" source="38238" target="38091" cy:directed="1"/>
      <edge id="40085" label="1011000111 (1) 1010000111" source="38238" target="38283" cy:directed="1"/>
      <edge id="40084" label="1011000111 (1) 1111000111" source="38238" target="38231" cy:directed="1"/>
      <edge id="40083" label="1101101101 (1) 1101100101" source="38237" target="38513" cy:directed="1"/>
      <edge id="40082" label="1101101101 (1) 1101111101" source="38237" target="38121" cy:directed="1"/>
      <edge id="40081" label="0100011011 (1) 0100011111" source="38236" target="38064" cy:directed="1"/>
      <edge id="40080" label="0100011011 (1) 0100010011" source="38236" target="38503" cy:directed="1"/>
      <edge id="40079" label="0100011011 (1) 0100001011" source="38236" target="38416" cy:directed="1"/>
      <edge id="40078" label="0100011011 (1) 0101011011" source="38236" target="38203" cy:directed="1"/>
      <edge id="40077" label="0100011011 (1) 0000011011" source="38236" target="38247" cy:directed="1"/>
      <edge id="40076" label="0100011101 (1) 0100011111" source="38235" target="38064" cy:directed="1"/>
      <edge id="40075" label="0100011101 (1) 0100001101" source="38235" target="38415" cy:directed="1"/>
      <edge id="40074" label="0100011101 (1) 0101011101" source="38235" target="38202" cy:directed="1"/>
      <edge id="40073" label="0100011101 (1) 0000011101" source="38235" target="38246" cy:directed="1"/>
      <edge id="40072" label="1100011011 (1) 1100011111" source="38234" target="38065" cy:directed="1"/>
      <edge id="40071" label="1100011011 (1) 1100010011" source="38234" target="38510" cy:directed="1"/>
      <edge id="40070" label="1100011011 (1) 1100001011" source="38234" target="38420" cy:directed="1"/>
      <edge id="40069" label="1100011011 (1) 1101011011" source="38234" target="38205" cy:directed="1"/>
      <edge id="40068" label="1100011011 (1) 1000011011" source="38234" target="38249" cy:directed="1"/>
      <edge id="40067" label="1100011101 (1) 1100011111" source="38233" target="38065" cy:directed="1"/>
      <edge id="40066" label="1100011101 (1) 1100001101" source="38233" target="38419" cy:directed="1"/>
      <edge id="40065" label="1100011101 (1) 1101011101" source="38233" target="38204" cy:directed="1"/>
      <edge id="40064" label="1100011101 (1) 1000011101" source="38233" target="38248" cy:directed="1"/>
      <edge id="40063" label="0101101101 (1) 0101100101" source="38232" target="38506" cy:directed="1"/>
      <edge id="40062" label="0101101101 (1) 0101111101" source="38232" target="38119" cy:directed="1"/>
      <edge id="40061" label="0101101101 (1) 0001101101" source="38232" target="38243" cy:directed="1"/>
      <edge id="40060" label="1111000111 (1) 1111100111" source="38231" target="38085" cy:directed="1"/>
      <edge id="40059" label="1111000111 (1) 1110000111" source="38231" target="38279" cy:directed="1"/>
      <edge id="40058" label="1111000111 (1) 1101000111" source="38231" target="38257" cy:directed="1"/>
      <edge id="40057" label="0111000111 (1) 0111100111" source="38230" target="38089" cy:directed="1"/>
      <edge id="40056" label="0111000111 (1) 0110000111" source="38230" target="38274" cy:directed="1"/>
      <edge id="40055" label="0111000111 (1) 0101000111" source="38230" target="38256" cy:directed="1"/>
      <edge id="40054" label="0111000111 (1) 0011000111" source="38230" target="38239" cy:directed="1"/>
      <edge id="40053" label="1010111110 (1) 1010111100" source="38229" target="38696" cy:directed="1"/>
      <edge id="40052" label="1010111110 (1) 1010110110" source="38229" target="38297" cy:directed="1"/>
      <edge id="40051" label="1010111110 (1) 1010011110" source="38229" target="38465" cy:directed="1"/>
      <edge id="40050" label="0010111110 (1) 0010111100" source="38228" target="38694" cy:directed="1"/>
      <edge id="40049" label="0010111110 (1) 0010110110" source="38228" target="38296" cy:directed="1"/>
      <edge id="40048" label="0010111110 (1) 0010011110" source="38228" target="38462" cy:directed="1"/>
      <edge id="40047" label="0010011011 (1) 0010011111" source="38227" target="38063" cy:directed="1"/>
      <edge id="40046" label="0010011011 (1) 0010010011" source="38227" target="38490" cy:directed="1"/>
      <edge id="40045" label="0010011011 (1) 0010001011" source="38227" target="38382" cy:directed="1"/>
      <edge id="40044" label="0010011011 (1) 0000011011" source="38227" target="38247" cy:directed="1"/>
      <edge id="40043" label="0010011101 (1) 0010011111" source="38226" target="38063" cy:directed="1"/>
      <edge id="40042" label="0010011101 (1) 0010001101" source="38226" target="38381" cy:directed="1"/>
      <edge id="40041" label="1110111110 (1) 1110111100" source="38225" target="38682" cy:directed="1"/>
      <edge id="40040" label="1110111110 (1) 1110110110" source="38225" target="38286" cy:directed="1"/>
      <edge id="40039" label="1110111110 (1) 1110011110" source="38225" target="38459" cy:directed="1"/>
      <edge id="40038" label="1110111110 (1) 1100111110" source="38225" target="38251" cy:directed="1"/>
      <edge id="40037" label="1110111110 (1) 1010111110" source="38225" target="38229" cy:directed="1"/>
      <edge id="40036" label="0110111110 (1) 0110111100" source="38224" target="38681" cy:directed="1"/>
      <edge id="40035" label="0110111110 (1) 0110110110" source="38224" target="38285" cy:directed="1"/>
      <edge id="40034" label="0110111110 (1) 0110011110" source="38224" target="38458" cy:directed="1"/>
      <edge id="40033" label="0110111110 (1) 0100111110" source="38224" target="38253" cy:directed="1"/>
      <edge id="40032" label="0110111110 (1) 0010111110" source="38224" target="38228" cy:directed="1"/>
      <edge id="40031" label="1010011011 (1) 1010011111" source="38223" target="38062" cy:directed="1"/>
      <edge id="40030" label="1010011011 (1) 1010010011" source="38223" target="38484" cy:directed="1"/>
      <edge id="40029" label="1010011011 (1) 1010001011" source="38223" target="38386" cy:directed="1"/>
      <edge id="40028" label="1010011011 (1) 1000011011" source="38223" target="38249" cy:directed="1"/>
      <edge id="40027" label="1010011101 (1) 1010011111" source="38222" target="38062" cy:directed="1"/>
      <edge id="40026" label="1010011101 (1) 1010001101" source="38222" target="38385" cy:directed="1"/>
      <edge id="40025" label="0011101101 (1) 0011100101" source="38221" target="38496" cy:directed="1"/>
      <edge id="40024" label="0011101101 (1) 0011111101" source="38221" target="38099" cy:directed="1"/>
      <edge id="40023" label="0011101101 (1) 0011001101" source="38221" target="38322" cy:directed="1"/>
      <edge id="40022" label="0011101101 (1) 0010101101" source="38221" target="38269" cy:directed="1"/>
      <edge id="40021" label="1011101101 (1) 1011100101" source="38220" target="38494" cy:directed="1"/>
      <edge id="40020" label="1011101101 (1) 1011111101" source="38220" target="38102" cy:directed="1"/>
      <edge id="40019" label="1011101101 (1) 1011001101" source="38220" target="38319" cy:directed="1"/>
      <edge id="40018" label="1011101101 (1) 1010101101" source="38220" target="38268" cy:directed="1"/>
      <edge id="40017" label="1011101101 (1) 1111101101" source="38220" target="38217" cy:directed="1"/>
      <edge id="40016" label="1110011011 (1) 1110011111" source="38219" target="38057" cy:directed="1"/>
      <edge id="40015" label="1110011011 (1) 1110010011" source="38219" target="38476" cy:directed="1"/>
      <edge id="40014" label="1110011011 (1) 1110001011" source="38219" target="38378" cy:directed="1"/>
      <edge id="40013" label="1110011011 (1) 1100011011" source="38219" target="38234" cy:directed="1"/>
      <edge id="40012" label="1110011011 (1) 1010011011" source="38219" target="38223" cy:directed="1"/>
      <edge id="40011" label="1110011101 (1) 1110011111" source="38218" target="38057" cy:directed="1"/>
      <edge id="40010" label="1110011101 (1) 1110001101" source="38218" target="38377" cy:directed="1"/>
      <edge id="40009" label="1110011101 (1) 1100011101" source="38218" target="38233" cy:directed="1"/>
      <edge id="40008" label="1110011101 (1) 1010011101" source="38218" target="38222" cy:directed="1"/>
      <edge id="40007" label="1111101101 (1) 1111100101" source="38217" target="38479" cy:directed="1"/>
      <edge id="40006" label="1111101101 (1) 1111111101" source="38217" target="38097" cy:directed="1"/>
      <edge id="40005" label="1111101101 (1) 1110101101" source="38217" target="38264" cy:directed="1"/>
      <edge id="40004" label="1111101101 (1) 1101101101" source="38217" target="38237" cy:directed="1"/>
      <edge id="40003" label="0110011011 (1) 0110011111" source="38216" target="38054" cy:directed="1"/>
      <edge id="40002" label="0110011011 (1) 0110010011" source="38216" target="38470" cy:directed="1"/>
      <edge id="40001" label="0110011011 (1) 0110001011" source="38216" target="38373" cy:directed="1"/>
      <edge id="40000" label="0110011011 (1) 0100011011" source="38216" target="38236" cy:directed="1"/>
      <edge id="39999" label="0110011011 (1) 0010011011" source="38216" target="38227" cy:directed="1"/>
      <edge id="39998" label="0110011101 (1) 0110011111" source="38215" target="38054" cy:directed="1"/>
      <edge id="39997" label="0110011101 (1) 0110001101" source="38215" target="38372" cy:directed="1"/>
      <edge id="39996" label="0110011101 (1) 0100011101" source="38215" target="38235" cy:directed="1"/>
      <edge id="39995" label="0110011101 (1) 0010011101" source="38215" target="38226" cy:directed="1"/>
      <edge id="39994" label="0111101101 (1) 0111100101" source="38214" target="38473" cy:directed="1"/>
      <edge id="39993" label="0111101101 (1) 0111111101" source="38214" target="38096" cy:directed="1"/>
      <edge id="39992" label="0111101101 (1) 0110101101" source="38214" target="38262" cy:directed="1"/>
      <edge id="39991" label="0111101101 (1) 0101101101" source="38214" target="38232" cy:directed="1"/>
      <edge id="39990" label="0111101101 (1) 0011101101" source="38214" target="38221" cy:directed="1"/>
      <edge id="39989" label="1001111110 (1) 1001111100" source="38213" target="38645" cy:directed="1"/>
      <edge id="39988" label="1001111110 (1) 1001110110" source="38213" target="38266" cy:directed="1"/>
      <edge id="39987" label="1001111110 (1) 1001011110" source="38213" target="38413" cy:directed="1"/>
      <edge id="39986" label="1001111110 (1) 1011111110" source="38213" target="38201" cy:directed="1"/>
      <edge id="39985" label="0001111110 (1) 0001111100" source="38212" target="38642" cy:directed="1"/>
      <edge id="39984" label="0001111110 (1) 0001110110" source="38212" target="38265" cy:directed="1"/>
      <edge id="39983" label="0001111110 (1) 0001011110" source="38212" target="38412" cy:directed="1"/>
      <edge id="39982" label="0001111110 (1) 0011111110" source="38212" target="38200" cy:directed="1"/>
      <edge id="39981" label="1101111110 (1) 1101111100" source="38211" target="38633" cy:directed="1"/>
      <edge id="39980" label="1101111110 (1) 1101110110" source="38211" target="38261" cy:directed="1"/>
      <edge id="39979" label="1101111110 (1) 1001111110" source="38211" target="38213" cy:directed="1"/>
      <edge id="39978" label="0101111110 (1) 0101111100" source="38210" target="38632" cy:directed="1"/>
      <edge id="39977" label="0101111110 (1) 0101110110" source="38210" target="38260" cy:directed="1"/>
      <edge id="39976" label="0101111110 (1) 0001111110" source="38210" target="38212" cy:directed="1"/>
      <edge id="39975" label="1001011011 (1) 1001011111" source="38209" target="38034" cy:directed="1"/>
      <edge id="39974" label="1001011011 (1) 1001010011" source="38209" target="38457" cy:directed="1"/>
      <edge id="39973" label="1001011011 (1) 1001001011" source="38209" target="38345" cy:directed="1"/>
      <edge id="39972" label="1001011101 (1) 1001011111" source="38208" target="38034" cy:directed="1"/>
      <edge id="39971" label="1001011101 (1) 1001001101" source="38208" target="38344" cy:directed="1"/>
      <edge id="39970" label="1001011101 (1) 1011011101" source="38208" target="38191" cy:directed="1"/>
      <edge id="39969" label="0001011011 (1) 0001011111" source="38207" target="38035" cy:directed="1"/>
      <edge id="39968" label="0001011011 (1) 0001010011" source="38207" target="38454" cy:directed="1"/>
      <edge id="39967" label="0001011011 (1) 0001001011" source="38207" target="38352" cy:directed="1"/>
      <edge id="39966" label="0001011101 (1) 0001011111" source="38206" target="38035" cy:directed="1"/>
      <edge id="39965" label="0001011101 (1) 0001001101" source="38206" target="38351" cy:directed="1"/>
      <edge id="39964" label="0001011101 (1) 0011011101" source="38206" target="38193" cy:directed="1"/>
      <edge id="39963" label="1101011011 (1) 1101011111" source="38205" target="38031" cy:directed="1"/>
      <edge id="39962" label="1101011011 (1) 1101010011" source="38205" target="38442" cy:directed="1"/>
      <edge id="39961" label="1101011011 (1) 1101001011" source="38205" target="38341" cy:directed="1"/>
      <edge id="39960" label="1101011011 (1) 1101111011" source="38205" target="38008" cy:directed="1"/>
      <edge id="39959" label="1101011011 (1) 1001011011" source="38205" target="38209" cy:directed="1"/>
      <edge id="39958" label="1101011101 (1) 1101011111" source="38204" target="38031" cy:directed="1"/>
      <edge id="39957" label="1101011101 (1) 1101001101" source="38204" target="38340" cy:directed="1"/>
      <edge id="39956" label="1101011101 (1) 1101111101" source="38204" target="38121" cy:directed="1"/>
      <edge id="39955" label="1101011101 (1) 1001011101" source="38204" target="38208" cy:directed="1"/>
      <edge id="39954" label="0101011011 (1) 0101011111" source="38203" target="38030" cy:directed="1"/>
      <edge id="39953" label="0101011011 (1) 0101010011" source="38203" target="38439" cy:directed="1"/>
      <edge id="39952" label="0101011011 (1) 0101001011" source="38203" target="38336" cy:directed="1"/>
      <edge id="39951" label="0101011011 (1) 0101111011" source="38203" target="38006" cy:directed="1"/>
      <edge id="39950" label="0101011011 (1) 0001011011" source="38203" target="38207" cy:directed="1"/>
      <edge id="39949" label="0101011101 (1) 0101011111" source="38202" target="38030" cy:directed="1"/>
      <edge id="39948" label="0101011101 (1) 0101001101" source="38202" target="38335" cy:directed="1"/>
      <edge id="39947" label="0101011101 (1) 0101111101" source="38202" target="38119" cy:directed="1"/>
      <edge id="39946" label="0101011101 (1) 0001011101" source="38202" target="38206" cy:directed="1"/>
      <edge id="39945" label="1011111110 (1) 1011111100" source="38201" target="38616" cy:directed="1"/>
      <edge id="39944" label="1011111110 (1) 1011110110" source="38201" target="38252" cy:directed="1"/>
      <edge id="39943" label="1011111110 (1) 1011011110" source="38201" target="38369" cy:directed="1"/>
      <edge id="39942" label="1011111110 (1) 1010111110" source="38201" target="38229" cy:directed="1"/>
      <edge id="39941" label="0011111110 (1) 0011111100" source="38200" target="38618" cy:directed="1"/>
      <edge id="39940" label="0011111110 (1) 0011110110" source="38200" target="38250" cy:directed="1"/>
      <edge id="39939" label="0011111110 (1) 0011011110" source="38200" target="38367" cy:directed="1"/>
      <edge id="39938" label="0011111110 (1) 0010111110" source="38200" target="38228" cy:directed="1"/>
      <edge id="39937" label="1101100011 (1) 1101100001" source="38199" target="38603" cy:directed="1"/>
      <edge id="39936" label="1101100011 (1) 1101100111" source="38199" target="38104" cy:directed="1"/>
      <edge id="39935" label="1101100011 (1) 1101110011" source="38199" target="38103" cy:directed="1"/>
      <edge id="39934" label="1111111110 (1) 1111111100" source="38198" target="38607" cy:directed="1"/>
      <edge id="39933" label="1111111110 (1) 1111110110" source="38198" target="38240" cy:directed="1"/>
      <edge id="39932" label="1111111110 (1) 1110111110" source="38198" target="38225" cy:directed="1"/>
      <edge id="39931" label="1111111110 (1) 1101111110" source="38198" target="38211" cy:directed="1"/>
      <edge id="39930" label="1111111110 (1) 1011111110" source="38198" target="38201" cy:directed="1"/>
      <edge id="39929" label="0101100011 (1) 0101100001" source="38197" target="38600" cy:directed="1"/>
      <edge id="39928" label="0101100011 (1) 0101100111" source="38197" target="38101" cy:directed="1"/>
      <edge id="39927" label="0101100011 (1) 0101110011" source="38197" target="38100" cy:directed="1"/>
      <edge id="39926" label="0101100011 (1) 0001100011" source="38197" target="38168" cy:directed="1"/>
      <edge id="39925" label="0000010111 (1) 0000000111" source="38196" target="38315" cy:directed="1"/>
      <edge id="39924" label="0000010111 (1) 0000110111" source="38196" target="38076" cy:directed="1"/>
      <edge id="39923" label="0000010111 (1) 0001010111" source="38196" target="38148" cy:directed="1"/>
      <edge id="39922" label="0000010111 (1) 0010010111" source="38196" target="38179" cy:directed="1"/>
      <edge id="39921" label="0111111110 (1) 0111111100" source="38195" target="38606" cy:directed="1"/>
      <edge id="39920" label="0111111110 (1) 0111110110" source="38195" target="38241" cy:directed="1"/>
      <edge id="39919" label="0111111110 (1) 0110111110" source="38195" target="38224" cy:directed="1"/>
      <edge id="39918" label="0111111110 (1) 0101111110" source="38195" target="38210" cy:directed="1"/>
      <edge id="39917" label="0111111110 (1) 0011111110" source="38195" target="38200" cy:directed="1"/>
      <edge id="39916" label="0011011011 (1) 0011011111" source="38194" target="38019" cy:directed="1"/>
      <edge id="39915" label="0011011011 (1) 0011010011" source="38194" target="38406" cy:directed="1"/>
      <edge id="39914" label="0011011011 (1) 0011001011" source="38194" target="38323" cy:directed="1"/>
      <edge id="39913" label="0011011011 (1) 0010011011" source="38194" target="38227" cy:directed="1"/>
      <edge id="39912" label="0011011011 (1) 0001011011" source="38194" target="38207" cy:directed="1"/>
      <edge id="39911" label="0011011101 (1) 0011011111" source="38193" target="38019" cy:directed="1"/>
      <edge id="39910" label="0011011101 (1) 0011001101" source="38193" target="38322" cy:directed="1"/>
      <edge id="39909" label="0011011101 (1) 0010011101" source="38193" target="38226" cy:directed="1"/>
      <edge id="39908" label="1011011011 (1) 1011011111" source="38192" target="38018" cy:directed="1"/>
      <edge id="39907" label="1011011011 (1) 1011010011" source="38192" target="38410" cy:directed="1"/>
      <edge id="39906" label="1011011011 (1) 1011001011" source="38192" target="38320" cy:directed="1"/>
      <edge id="39905" label="1011011011 (1) 1010011011" source="38192" target="38223" cy:directed="1"/>
      <edge id="39904" label="1011011011 (1) 1001011011" source="38192" target="38209" cy:directed="1"/>
      <edge id="39903" label="1011011101 (1) 1011011111" source="38191" target="38018" cy:directed="1"/>
      <edge id="39902" label="1011011101 (1) 1011001101" source="38191" target="38319" cy:directed="1"/>
      <edge id="39901" label="1011011101 (1) 1010011101" source="38191" target="38222" cy:directed="1"/>
      <edge id="39900" label="1000010111 (1) 1000000111" source="38190" target="38325" cy:directed="1"/>
      <edge id="39899" label="1000010111 (1) 1000110111" source="38190" target="38077" cy:directed="1"/>
      <edge id="39898" label="1000010111 (1) 1001010111" source="38190" target="38149" cy:directed="1"/>
      <edge id="39897" label="1000010111 (1) 1010010111" source="38190" target="38177" cy:directed="1"/>
      <edge id="39896" label="1100010111 (1) 1100000111" source="38189" target="38314" cy:directed="1"/>
      <edge id="39895" label="1100010111 (1) 1100110111" source="38189" target="38075" cy:directed="1"/>
      <edge id="39894" label="1100010111 (1) 1101010111" source="38189" target="38140" cy:directed="1"/>
      <edge id="39893" label="1100010111 (1) 1000010111" source="38189" target="38190" cy:directed="1"/>
      <edge id="39892" label="0100010111 (1) 0100000111" source="38188" target="38308" cy:directed="1"/>
      <edge id="39891" label="0100010111 (1) 0100110111" source="38188" target="38074" cy:directed="1"/>
      <edge id="39890" label="0100010111 (1) 0101010111" source="38188" target="38137" cy:directed="1"/>
      <edge id="39889" label="0100010111 (1) 0000010111" source="38188" target="38196" cy:directed="1"/>
      <edge id="39888" label="0111011011 (1) 0111011111" source="38187" target="38017" cy:directed="1"/>
      <edge id="39887" label="0111011011 (1) 0111010011" source="38187" target="38397" cy:directed="1"/>
      <edge id="39886" label="0111011011 (1) 0111001011" source="38187" target="38304" cy:directed="1"/>
      <edge id="39885" label="0111011011 (1) 0111111011" source="38187" target="37998" cy:directed="1"/>
      <edge id="39884" label="0111011011 (1) 0110011011" source="38187" target="38216" cy:directed="1"/>
      <edge id="39883" label="0111011011 (1) 0101011011" source="38187" target="38203" cy:directed="1"/>
      <edge id="39882" label="0111011011 (1) 0011011011" source="38187" target="38194" cy:directed="1"/>
      <edge id="39881" label="0111011101 (1) 0111011111" source="38186" target="38017" cy:directed="1"/>
      <edge id="39880" label="0111011101 (1) 0111001101" source="38186" target="38303" cy:directed="1"/>
      <edge id="39879" label="0111011101 (1) 0111111101" source="38186" target="38096" cy:directed="1"/>
      <edge id="39878" label="0111011101 (1) 0110011101" source="38186" target="38215" cy:directed="1"/>
      <edge id="39877" label="0111011101 (1) 0101011101" source="38186" target="38202" cy:directed="1"/>
      <edge id="39876" label="0111011101 (1) 0011011101" source="38186" target="38193" cy:directed="1"/>
      <edge id="39875" label="1111011011 (1) 1111011111" source="38185" target="38016" cy:directed="1"/>
      <edge id="39874" label="1111011011 (1) 1111010011" source="38185" target="38393" cy:directed="1"/>
      <edge id="39873" label="1111011011 (1) 1111001011" source="38185" target="38311" cy:directed="1"/>
      <edge id="39872" label="1111011011 (1) 1111111011" source="38185" target="38000" cy:directed="1"/>
      <edge id="39871" label="1111011011 (1) 1110011011" source="38185" target="38219" cy:directed="1"/>
      <edge id="39870" label="1111011011 (1) 1101011011" source="38185" target="38205" cy:directed="1"/>
      <edge id="39869" label="1111011011 (1) 1011011011" source="38185" target="38192" cy:directed="1"/>
      <edge id="39868" label="1111011101 (1) 1111011111" source="38184" target="38016" cy:directed="1"/>
      <edge id="39867" label="1111011101 (1) 1111001101" source="38184" target="38310" cy:directed="1"/>
      <edge id="39866" label="1111011101 (1) 1111111101" source="38184" target="38097" cy:directed="1"/>
      <edge id="39865" label="1111011101 (1) 1110011101" source="38184" target="38218" cy:directed="1"/>
      <edge id="39864" label="1111011101 (1) 1101011101" source="38184" target="38204" cy:directed="1"/>
      <edge id="39863" label="1111011101 (1) 1011011101" source="38184" target="38191" cy:directed="1"/>
      <edge id="39862" label="1000111101 (1) 1000011101" source="38183" target="38248" cy:directed="1"/>
      <edge id="39861" label="1000111101 (1) 1001111101" source="38183" target="38124" cy:directed="1"/>
      <edge id="39860" label="1000111101 (1) 1010111101" source="38183" target="38160" cy:directed="1"/>
      <edge id="39859" label="0000111101 (1) 0000011101" source="38182" target="38246" cy:directed="1"/>
      <edge id="39858" label="0000111101 (1) 0001111101" source="38182" target="38122" cy:directed="1"/>
      <edge id="39857" label="0000111101 (1) 0010111101" source="38182" target="38157" cy:directed="1"/>
      <edge id="39856" label="1101101110 (1) 1101101100" source="38181" target="38583" cy:directed="1"/>
      <edge id="39855" label="1101101110 (1) 1101101010" source="38181" target="38499" cy:directed="1"/>
      <edge id="39854" label="1101101110 (1) 1101100110" source="38181" target="38368" cy:directed="1"/>
      <edge id="39853" label="1101101110 (1) 1101111110" source="38181" target="38211" cy:directed="1"/>
      <edge id="39852" label="0101101110 (1) 0101101100" source="38180" target="38581" cy:directed="1"/>
      <edge id="39851" label="0101101110 (1) 0101101010" source="38180" target="38492" cy:directed="1"/>
      <edge id="39850" label="0101101110 (1) 0101100110" source="38180" target="38366" cy:directed="1"/>
      <edge id="39849" label="0101101110 (1) 0101111110" source="38180" target="38210" cy:directed="1"/>
      <edge id="39848" label="0101101110 (1) 0001101110" source="38180" target="38146" cy:directed="1"/>
      <edge id="39847" label="0010010111 (1) 0010000111" source="38179" target="38284" cy:directed="1"/>
      <edge id="39846" label="0010010111 (1) 0010110111" source="38179" target="38072" cy:directed="1"/>
      <edge id="39845" label="0100111101 (1) 0100011101" source="38178" target="38235" cy:directed="1"/>
      <edge id="39844" label="0100111101 (1) 0101111101" source="38178" target="38119" cy:directed="1"/>
      <edge id="39843" label="0100111101 (1) 0000111101" source="38178" target="38182" cy:directed="1"/>
      <edge id="39842" label="1010010111 (1) 1010000111" source="38177" target="38283" cy:directed="1"/>
      <edge id="39841" label="1010010111 (1) 1010110111" source="38177" target="38073" cy:directed="1"/>
      <edge id="39840" label="1111100011 (1) 1111100001" source="38176" target="38578" cy:directed="1"/>
      <edge id="39839" label="1111100011 (1) 1111100111" source="38176" target="38085" cy:directed="1"/>
      <edge id="39838" label="1111100011 (1) 1111110011" source="38176" target="38084" cy:directed="1"/>
      <edge id="39837" label="1111100011 (1) 1110100011" source="38176" target="38134" cy:directed="1"/>
      <edge id="39836" label="1111100011 (1) 1101100011" source="38176" target="38199" cy:directed="1"/>
      <edge id="39835" label="0111100011 (1) 0111100001" source="38175" target="38574" cy:directed="1"/>
      <edge id="39834" label="0111100011 (1) 0111100111" source="38175" target="38089" cy:directed="1"/>
      <edge id="39833" label="0111100011 (1) 0111110011" source="38175" target="38088" cy:directed="1"/>
      <edge id="39832" label="0111100011 (1) 0110100011" source="38175" target="38128" cy:directed="1"/>
      <edge id="39831" label="0111100011 (1) 0101100011" source="38175" target="38197" cy:directed="1"/>
      <edge id="39830" label="0111100011 (1) 0011100011" source="38175" target="38109" cy:directed="1"/>
      <edge id="39829" label="1100111101 (1) 1100011101" source="38174" target="38233" cy:directed="1"/>
      <edge id="39828" label="1100111101 (1) 1101111101" source="38174" target="38121" cy:directed="1"/>
      <edge id="39827" label="1100111101 (1) 1000111101" source="38174" target="38183" cy:directed="1"/>
      <edge id="39826" label="1110010111 (1) 1110000111" source="38173" target="38279" cy:directed="1"/>
      <edge id="39825" label="1110010111 (1) 1110110111" source="38173" target="38068" cy:directed="1"/>
      <edge id="39824" label="1110010111 (1) 1100010111" source="38173" target="38189" cy:directed="1"/>
      <edge id="39823" label="1110010111 (1) 1010010111" source="38173" target="38177" cy:directed="1"/>
      <edge id="39822" label="0110010111 (1) 0110000111" source="38172" target="38274" cy:directed="1"/>
      <edge id="39821" label="0110010111 (1) 0110110111" source="38172" target="38066" cy:directed="1"/>
      <edge id="39820" label="0110010111 (1) 0100010111" source="38172" target="38188" cy:directed="1"/>
      <edge id="39819" label="0110010111 (1) 0010010111" source="38172" target="38179" cy:directed="1"/>
      <edge id="39818" label="0000100011 (1) 0000100001" source="38171" target="38573" cy:directed="1"/>
      <edge id="39817" label="0000100011 (1) 0000100111" source="38171" target="38170" cy:directed="1"/>
      <edge id="39816" label="0000100011 (1) 0000110011" source="38171" target="38169" cy:directed="1"/>
      <edge id="39815" label="0000100011 (1) 0000000011" source="38171" target="38690" cy:directed="1"/>
      <edge id="39814" label="0000100011 (1) 0001100011" source="38171" target="38168" cy:directed="1"/>
      <edge id="39813" label="0000100011 (1) 0010100011" source="38171" target="38167" cy:directed="1"/>
      <edge id="39812" label="0000100111 (1) 0000100101" source="38170" target="38572" cy:directed="1"/>
      <edge id="39811" label="0000100111 (1) 0000110111" source="38170" target="38076" cy:directed="1"/>
      <edge id="39810" label="0000100111 (1) 0001100111" source="38170" target="38111" cy:directed="1"/>
      <edge id="39809" label="0000100111 (1) 0010100111" source="38170" target="38139" cy:directed="1"/>
      <edge id="39808" label="0000110011 (1) 0000110001" source="38169" target="38571" cy:directed="1"/>
      <edge id="39807" label="0000110011 (1) 0000110111" source="38169" target="38076" cy:directed="1"/>
      <edge id="39806" label="0000110011 (1) 0000010011" source="38169" target="38523" cy:directed="1"/>
      <edge id="39805" label="0000110011 (1) 0001110011" source="38169" target="38110" cy:directed="1"/>
      <edge id="39804" label="0000110011 (1) 0010110011" source="38169" target="38138" cy:directed="1"/>
      <edge id="39803" label="0001100011 (1) 0001100001" source="38168" target="38570" cy:directed="1"/>
      <edge id="39802" label="0001100011 (1) 0001100111" source="38168" target="38111" cy:directed="1"/>
      <edge id="39801" label="0001100011 (1) 0001110011" source="38168" target="38110" cy:directed="1"/>
      <edge id="39800" label="0001100011 (1) 0001000011" source="38168" target="38615" cy:directed="1"/>
      <edge id="39799" label="0001100011 (1) 0011100011" source="38168" target="38109" cy:directed="1"/>
      <edge id="39798" label="0010100011 (1) 0010100001" source="38167" target="38569" cy:directed="1"/>
      <edge id="39797" label="0010100011 (1) 0010100111" source="38167" target="38139" cy:directed="1"/>
      <edge id="39796" label="0010100011 (1) 0010110011" source="38167" target="38138" cy:directed="1"/>
      <edge id="39795" label="0010100011 (1) 0010000011" source="38167" target="38647" cy:directed="1"/>
      <edge id="39794" label="1000100011 (1) 1000100001" source="38166" target="38568" cy:directed="1"/>
      <edge id="39793" label="1000100011 (1) 1000100111" source="38166" target="38165" cy:directed="1"/>
      <edge id="39792" label="1000100011 (1) 1000110011" source="38166" target="38164" cy:directed="1"/>
      <edge id="39791" label="1000100011 (1) 1000000011" source="38166" target="38686" cy:directed="1"/>
      <edge id="39790" label="1000100011 (1) 1001100011" source="38166" target="38163" cy:directed="1"/>
      <edge id="39789" label="1000100011 (1) 1010100011" source="38166" target="38162" cy:directed="1"/>
      <edge id="39788" label="1000100011 (1) 1100100011" source="38166" target="38161" cy:directed="1"/>
      <edge id="39787" label="1000100111 (1) 1000100101" source="38165" target="38567" cy:directed="1"/>
      <edge id="39786" label="1000100111 (1) 1000110111" source="38165" target="38077" cy:directed="1"/>
      <edge id="39785" label="1000100111 (1) 1001100111" source="38165" target="38108" cy:directed="1"/>
      <edge id="39784" label="1000100111 (1) 1010100111" source="38165" target="38136" cy:directed="1"/>
      <edge id="39783" label="1000100111 (1) 1100100111" source="38165" target="38159" cy:directed="1"/>
      <edge id="39782" label="1000110011 (1) 1000110001" source="38164" target="38566" cy:directed="1"/>
      <edge id="39781" label="1000110011 (1) 1000110111" source="38164" target="38077" cy:directed="1"/>
      <edge id="39780" label="1000110011 (1) 1000010011" source="38164" target="38528" cy:directed="1"/>
      <edge id="39779" label="1000110011 (1) 1001110011" source="38164" target="38107" cy:directed="1"/>
      <edge id="39778" label="1000110011 (1) 1010110011" source="38164" target="38135" cy:directed="1"/>
      <edge id="39777" label="1001100011 (1) 1001100001" source="38163" target="38565" cy:directed="1"/>
      <edge id="39776" label="1001100011 (1) 1001100111" source="38163" target="38108" cy:directed="1"/>
      <edge id="39775" label="1001100011 (1) 1001110011" source="38163" target="38107" cy:directed="1"/>
      <edge id="39774" label="1001100011 (1) 1001000011" source="38163" target="38613" cy:directed="1"/>
      <edge id="39773" label="1001100011 (1) 1011100011" source="38163" target="38106" cy:directed="1"/>
      <edge id="39772" label="1001100011 (1) 1101100011" source="38163" target="38199" cy:directed="1"/>
      <edge id="39771" label="1010100011 (1) 1010100001" source="38162" target="38564" cy:directed="1"/>
      <edge id="39770" label="1010100011 (1) 1010100111" source="38162" target="38136" cy:directed="1"/>
      <edge id="39769" label="1010100011 (1) 1010110011" source="38162" target="38135" cy:directed="1"/>
      <edge id="39768" label="1010100011 (1) 1010000011" source="38162" target="38651" cy:directed="1"/>
      <edge id="39767" label="1010100011 (1) 1110100011" source="38162" target="38134" cy:directed="1"/>
      <edge id="39766" label="1100100011 (1) 1100100001" source="38161" target="38563" cy:directed="1"/>
      <edge id="39765" label="1100100011 (1) 1100100111" source="38161" target="38159" cy:directed="1"/>
      <edge id="39764" label="1100100011 (1) 1100110011" source="38161" target="38158" cy:directed="1"/>
      <edge id="39763" label="1100100011 (1) 1100000011" source="38161" target="38680" cy:directed="1"/>
      <edge id="39762" label="1100100011 (1) 1101100011" source="38161" target="38199" cy:directed="1"/>
      <edge id="39761" label="1010111101 (1) 1010011101" source="38160" target="38222" cy:directed="1"/>
      <edge id="39760" label="1100100111 (1) 1100100101" source="38159" target="38559" cy:directed="1"/>
      <edge id="39759" label="1100100111 (1) 1100110111" source="38159" target="38075" cy:directed="1"/>
      <edge id="39758" label="1100100111 (1) 1101100111" source="38159" target="38104" cy:directed="1"/>
      <edge id="39757" label="1100110011 (1) 1100110001" source="38158" target="38558" cy:directed="1"/>
      <edge id="39756" label="1100110011 (1) 1100110111" source="38158" target="38075" cy:directed="1"/>
      <edge id="39755" label="1100110011 (1) 1100010011" source="38158" target="38510" cy:directed="1"/>
      <edge id="39754" label="1100110011 (1) 1101110011" source="38158" target="38103" cy:directed="1"/>
      <edge id="39753" label="1100110011 (1) 1000110011" source="38158" target="38164" cy:directed="1"/>
      <edge id="39752" label="0010111101 (1) 0010011101" source="38157" target="38226" cy:directed="1"/>
      <edge id="39751" label="0100100011 (1) 0100100001" source="38156" target="38557" cy:directed="1"/>
      <edge id="39750" label="0100100011 (1) 0100100111" source="38156" target="38155" cy:directed="1"/>
      <edge id="39749" label="0100100011 (1) 0100110011" source="38156" target="38154" cy:directed="1"/>
      <edge id="39748" label="0100100011 (1) 0100000011" source="38156" target="38676" cy:directed="1"/>
      <edge id="39747" label="0100100011 (1) 0101100011" source="38156" target="38197" cy:directed="1"/>
      <edge id="39746" label="0100100011 (1) 0000100011" source="38156" target="38171" cy:directed="1"/>
      <edge id="39745" label="0100100111 (1) 0100100101" source="38155" target="38556" cy:directed="1"/>
      <edge id="39744" label="0100100111 (1) 0100110111" source="38155" target="38074" cy:directed="1"/>
      <edge id="39743" label="0100100111 (1) 0101100111" source="38155" target="38101" cy:directed="1"/>
      <edge id="39742" label="0100100111 (1) 0000100111" source="38155" target="38170" cy:directed="1"/>
      <edge id="39741" label="0100110011 (1) 0100110001" source="38154" target="38555" cy:directed="1"/>
      <edge id="39740" label="0100110011 (1) 0100110111" source="38154" target="38074" cy:directed="1"/>
      <edge id="39739" label="0100110011 (1) 0100010011" source="38154" target="38503" cy:directed="1"/>
      <edge id="39738" label="0100110011 (1) 0101110011" source="38154" target="38100" cy:directed="1"/>
      <edge id="39737" label="0100110011 (1) 0000110011" source="38154" target="38169" cy:directed="1"/>
      <edge id="39736" label="1111101110 (1) 1111101100" source="38153" target="38553" cy:directed="1"/>
      <edge id="39735" label="1111101110 (1) 1111101010" source="38153" target="38463" cy:directed="1"/>
      <edge id="39734" label="1111101110 (1) 1111100110" source="38153" target="38343" cy:directed="1"/>
      <edge id="39733" label="1111101110 (1) 1111111110" source="38153" target="38198" cy:directed="1"/>
      <edge id="39732" label="1111101110 (1) 1110101110" source="38153" target="38117" cy:directed="1"/>
      <edge id="39731" label="1111101110 (1) 1101101110" source="38153" target="38181" cy:directed="1"/>
      <edge id="39730" label="0111101110 (1) 0111101100" source="38152" target="38550" cy:directed="1"/>
      <edge id="39729" label="0111101110 (1) 0111101010" source="38152" target="38460" cy:directed="1"/>
      <edge id="39728" label="0111101110 (1) 0111100110" source="38152" target="38342" cy:directed="1"/>
      <edge id="39727" label="0111101110 (1) 0111111110" source="38152" target="38195" cy:directed="1"/>
      <edge id="39726" label="0111101110 (1) 0110101110" source="38152" target="38114" cy:directed="1"/>
[truncated: 75,632 more chars]
