# Supplementary material
Source: publisher figshare collection journal article supplement (https://springernature.figshare.com/ndownloader/files/17562821)
Supplement: Supplementary file 1 [file 17562821 › CytoscapeSession-2018_09_25-21_15/properties/groupSettings.props]

#Written by: Cytoscape's PropertiesWriterImpl
#Tue Sep 25 21:16:04 CEST 2018
