# Supplementary material
Source: publisher figshare collection journal article supplement (https://springernature.figshare.com/ndownloader/files/17562821)
Supplement: Supplementary file 1 [file 17562821 › CytoscapeSession-2018_09_25-21_15/session_vizmap.xml]

<?xml version="1.0" encoding="UTF-8" standalone="yes"?>
<vizmap documentVersion="3.0" id="VizMap-2018_09_25-21_16">
    <visualStyle name="size_rank_2">
        <network>
            <visualProperty name="NETWORK_TITLE" default=""/>
            <visualProperty name="NETWORK_EDGE_SELECTION" default="true"/>
            <visualProperty name="NETWORK_SIZE" default="550.0"/>
            <visualProperty name="NETWORK_BACKGROUND_PAINT" default="#EBEBEB"/>
            <visualProperty name="NETWORK_WIDTH" default="550.0"/>
            <visualProperty name="NETWORK_NODE_SELECTION" default="true"/>
            <visualProperty name="NETWORK_CENTER_Z_LOCATION" default="0.0"/>
            <visualProperty name="NETWORK_CENTER_X_LOCATION" default="0.0"/>
            <visualProperty name="NETWORK_SCALE_FACTOR" default="1.0"/>
            <visualProperty name="NETWORK_DEPTH" default="0.0"/>
            <visualProperty name="NETWORK_HEIGHT" default="400.0"/>
            <visualProperty name="NETWORK_CENTER_Y_LOCATION" default="0.0"/>
        </network>
        <node>
            <dependency name="nodeCustomGraphicsSizeSync" value="true"/>
            <dependency name="nodeSizeLocked" value="true"/>
            <visualProperty name="NODE_CUSTOMGRAPHICS_POSITION_5" default="C,C,c,0.00,0.00"/>
            <visualProperty name="NODE_CUSTOMGRAPHICS_POSITION_6" default="C,C,c,0.00,0.00"/>
            <visualProperty name="NODE_CUSTOMPAINT_1" default="DefaultVisualizableVisualProperty(id=NODE_CUSTOMPAINT_1, name=Node Custom Paint 1)"/>
            <visualProperty name="NODE_BORDER_PAINT" default="#000000"/>
            <visualProperty name="NODE_CUSTOMGRAPHICS_SIZE_5" default="50.0"/>
            <visualProperty name="NODE_CUSTOMGRAPHICS_SIZE_8" default="50.0"/>
            <visualProperty name="NODE_CUSTOMGRAPHICS_8" default="org.cytoscape.ding.customgraphics.NullCustomGraphics,0,[ Remove Graphics ],"/>
            <visualProperty name="NODE_CUSTOMGRAPHICS_SIZE_7" default="50.0"/>
            <visualProperty name="NODE_CUSTOMPAINT_6" default="DefaultVisualizableVisualProperty(id=NODE_CUSTOMPAINT_6, name=Node Custom Paint 6)"/>
            <visualProperty name="NODE_CUSTOMGRAPHICS_SIZE_6" default="50.0"/>
            <visualProperty name="NODE_LABEL_WIDTH" default="200.0"/>
            <visualProperty name="NODE_CUSTOMGRAPHICS_POSITION_7" default="C,C,c,0.00,0.00"/>
            <visualProperty name="NODE_CUSTOMGRAPHICS_SIZE_9" default="50.0"/>
            <visualProperty name="NODE_SIZE" default="12.0">
                <continuousMapping attributeType="float" attributeName="diffusion_output__rank">
                    <continuousMappingPoint lesserValue="1.0" greaterValue="39.11245096536507" equalValue="39.11245096536507" attrValue="0.0"/>
                    <continuousMappingPoint lesserValue="13.821692732043733" greaterValue="1.0" equalValue="13.821692732043733" attrValue="99.0"/>
                </continuousMapping>
            </visualProperty>
            <visualProperty name="NODE_PAINT" default="#787878"/>
            <visualProperty name="NODE_CUSTOMGRAPHICS_SIZE_4" default="50.0"/>
            <visualProperty name="NODE_CUSTOMGRAPHICS_3" default="org.cytoscape.ding.customgraphics.NullCustomGraphics,0,[ Remove Graphics ],"/>
            <visualProperty name="NODE_LABEL_POSITION" default="C,C,c,0.00,0.00"/>
            <visualProperty name="NODE_CUSTOMGRAPHICS_POSITION_4" default="C,C,c,0.00,0.00"/>
            <visualProperty name="NODE_CUSTOMGRAPHICS_7" default="org.cytoscape.ding.customgraphics.NullCustomGraphics,0,[ Remove Graphics ],"/>
            <visualProperty name="NODE_Z_LOCATION" default="0.0"/>
            <visualProperty name="NODE_CUSTOMGRAPHICS_4" default="org.cytoscape.ding.customgraphics.NullCustomGraphics,0,[ Remove Graphics ],"/>
            <visualProperty name="NODE_CUSTOMGRAPHICS_POSITION_3" default="C,C,c,0.00,0.00"/>
            <visualProperty name="NODE_NESTED_NETWORK_IMAGE_VISIBLE" default="true"/>
            <visualProperty name="NODE_TRANSPARENCY" default="255"/>
            <visualProperty name="COMPOUND_NODE_PADDING" default="10.0"/>
            <visualProperty name="NODE_WIDTH" default="50.0"/>
            <visualProperty name="NODE_CUSTOMGRAPHICS_POSITION_8" default="C,C,c,0.00,0.00"/>
            <visualProperty name="NODE_CUSTOMGRAPHICS_1" default="org.cytoscape.ding.customgraphics.NullCustomGraphics,0,[ Remove Graphics ],"/>
            <visualProperty name="NODE_LABEL_FONT_SIZE" default="9"/>
            <visualProperty name="NODE_Y_LOCATION" default="0.0"/>
            <visualProperty name="NODE_LABEL_FONT_FACE" default="SansSerif.plain,plain,12"/>
            <visualProperty name="NODE_CUSTOMPAINT_4" default="DefaultVisualizableVisualProperty(id=NODE_CUSTOMPAINT_4, name=Node Custom Paint 4)"/>
            <visualProperty name="NODE_CUSTOMPAINT_7" default="DefaultVisualizableVisualProperty(id=NODE_CUSTOMPAINT_7, name=Node Custom Paint 7)"/>
            <visualProperty name="NODE_CUSTOMGRAPHICS_5" default="org.cytoscape.ding.customgraphics.NullCustomGraphics,0,[ Remove Graphics ],"/>
            <visualProperty name="NODE_CUSTOMGRAPHICS_SIZE_2" default="50.0"/>
            <visualProperty name="NODE_BORDER_STROKE" default="SOLID"/>
            <visualProperty name="NODE_LABEL_TRANSPARENCY" default="255"/>
            <visualProperty name="NODE_TOOLTIP" default=""/>
            <visualProperty name="NODE_SELECTED_PAINT" default="#FFFF00"/>
            <visualProperty name="NODE_FILL_COLOR" default="#CCCCFF"/>
            <visualProperty name="NODE_CUSTOMGRAPHICS_POSITION_1" default="C,C,c,0.00,0.00"/>
            <visualProperty name="NODE_CUSTOMGRAPHICS_POSITION_2" default="C,C,c,0.00,0.00"/>
            <visualProperty name="NODE_CUSTOMGRAPHICS_SIZE_3" default="50.0"/>
            <visualProperty name="NODE_BORDER_TRANSPARENCY" default="255"/>
            <visualProperty name="NODE_CUSTOMPAINT_2" default="DefaultVisualizableVisualProperty(id=NODE_CUSTOMPAINT_2, name=Node Custom Paint 2)"/>
            <visualProperty name="NODE_CUSTOMGRAPHICS_9" default="org.cytoscape.ding.customgraphics.NullCustomGraphics,0,[ Remove Graphics ],"/>
            <visualProperty name="NODE_CUSTOMGRAPHICS_SIZE_1" default="50.0"/>
            <visualProperty name="NODE_SELECTED" default="false"/>
            <visualProperty name="NODE_CUSTOMPAINT_8" default="DefaultVisualizableVisualProperty(id=NODE_CUSTOMPAINT_8, name=Node Custom Paint 8)"/>
            <visualProperty name="NODE_X_LOCATION" default="0.0"/>
            <visualProperty name="NODE_CUSTOMGRAPHICS_6" default="org.cytoscape.ding.customgraphics.NullCustomGraphics,0,[ Remove Graphics ],"/>
            <visualProperty name="NODE_SHAPE" default="RECTANGLE"/>
            <visualProperty name="NODE_HEIGHT" default="50.0"/>
            <visualProperty name="NODE_LABEL" default="">
                <passthroughMapping attributeType="string" attributeName="name"/>
            </visualProperty>
            <visualProperty name="NODE_CUSTOMGRAPHICS_2" default="org.cytoscape.ding.customgraphics.NullCustomGraphics,0,[ Remove Graphics ],"/>
            <visualProperty name="NODE_BORDER_WIDTH" default="0.0"/>
            <visualProperty name="NODE_CUSTOMGRAPHICS_POSITION_9" default="C,C,c,0.00,0.00"/>
            <visualProperty name="NODE_CUSTOMPAINT_3" default="DefaultVisualizableVisualProperty(id=NODE_CUSTOMPAINT_3, name=Node Custom Paint 3)"/>
            <visualProperty name="NODE_VISIBLE" default="true"/>
            <visualProperty name="NODE_CUSTOMPAINT_5" default="DefaultVisualizableVisualProperty(id=NODE_CUSTOMPAINT_5, name=Node Custom Paint 5)"/>
            <visualProperty name="NODE_CUSTOMPAINT_9" default="DefaultVisualizableVisualProperty(id=NODE_CUSTOMPAINT_9, name=Node Custom Paint 9)"/>
            <visualProperty name="NODE_DEPTH" default="0.0"/>
            <visualProperty name="COMPOUND_NODE_SHAPE" default="ROUND_RECTANGLE"/>
            <visualProperty name="NODE_LABEL_COLOR" default="#333333"/>
        </node>
        <edge>
            <dependency name="arrowColorMatchesEdge" value="false"/>
            <visualProperty name="EDGE_VISIBLE" default="true"/>
            <visualProperty name="EDGE_LABEL_COLOR" default="#000000"/>
            <visualProperty name="EDGE_STROKE_SELECTED_PAINT" default="#FF0000"/>
            <visualProperty name="EDGE_CURVED" default="true"/>
            <visualProperty name="EDGE_SELECTED" default="false"/>
            <visualProperty name="EDGE_LABEL" default=""/>
            <visualProperty name="EDGE_STROKE_UNSELECTED_PAINT" default="#4C4C4C"/>
            <visualProperty name="EDGE_LABEL_WIDTH" default="200.0"/>
            <visualProperty name="EDGE_TRANSPARENCY" default="255"/>
            <visualProperty name="EDGE_UNSELECTED_PAINT" default="#404040"/>
            <visualProperty name="EDGE_LABEL_FONT_FACE" default="SansSerif.plain,plain,10"/>
            <visualProperty name="EDGE_LINE_TYPE" default="SOLID"/>
            <visualProperty name="EDGE_SOURCE_ARROW_SELECTED_PAINT" default="#FFFF00"/>
            <visualProperty name="EDGE_LABEL_FONT_SIZE" default="10"/>
            <visualProperty name="EDGE_SOURCE_ARROW_UNSELECTED_PAINT" default="#000000"/>
            <visualProperty name="EDGE_WIDTH" default="2.0"/>
            <visualProperty name="EDGE_PAINT" default="#808080"/>
            <visualProperty name="EDGE_TARGET_ARROW_UNSELECTED_PAINT" default="#000000"/>
            <visualProperty name="EDGE_LABEL_TRANSPARENCY" default="255"/>
            <visualProperty name="EDGE_TOOLTIP" default=""/>
            <visualProperty name="EDGE_TARGET_ARROW_SHAPE" default="NONE"/>
            <visualProperty name="EDGE_SELECTED_PAINT" default="#FF0000"/>
            <visualProperty name="EDGE_BEND" default=""/>
            <visualProperty name="EDGE_TARGET_ARROW_SELECTED_PAINT" default="#FFFF00"/>
            <visualProperty name="EDGE_SOURCE_ARROW_SHAPE" default="NONE"/>
        </edge>
    </visualStyle>
    <visualStyle name="BioPAX">
        <network/>
        <node>
            <dependency name="nodeCustomGraphicsSizeSync" value="true"/>
            <dependency name="nodeSizeLocked" value="false"/>
            <visualProperty name="NODE_BORDER_PAINT" default="#006666">
                <discreteMapping attributeType="string" attributeName="BIOPAX_TYPE">
                    <discreteMappingEntry value="#006666" attributeValue="Complex"/>
                </discreteMapping>
            </visualProperty>
            <visualProperty name="NODE_WIDTH" default="20.0">
                <discreteMapping attributeType="string" attributeName="BIOPAX_TYPE">
                    <discreteMappingEntry value="13.4" attributeValue="BiochemicalReaction"/>
                    <discreteMappingEntry value="13.4" attributeValue="GeneticInteraction"/>
                    <discreteMappingEntry value="13.4" attributeValue="Interaction"/>
                    <discreteMappingEntry value="13.4" attributeValue="TransportWithBiochemicalReaction"/>
                    <discreteMappingEntry value="13.4" attributeValue="Conversion"/>
                    <discreteMappingEntry value="13.4" attributeValue="ComplexAssembly"/>
                    <discreteMappingEntry value="13.4" attributeValue="Complex"/>
                    <discreteMappingEntry value="13.4" attributeValue="Degradation"/>
                    <discreteMappingEntry value="13.4" attributeValue="TemplateReactionRegulation"/>
                    <discreteMappingEntry value="13.4" attributeValue="Control"/>
                    <discreteMappingEntry value="13.4" attributeValue="Modulation"/>
                    <discreteMappingEntry value="13.4" attributeValue="TemplateReaction"/>
                    <discreteMappingEntry value="13.4" attributeValue="MolecularInteraction"/>
                    <discreteMappingEntry value="13.4" attributeValue="Catalysis"/>
                    <discreteMappingEntry value="13.4" attributeValue="Transport"/>
                </discreteMapping>
            </visualProperty>
            <visualProperty name="NODE_FILL_COLOR" default="#FFFFFF">
                <discreteMapping attributeType="string" attributeName="BIOPAX_TYPE">
                    <discreteMappingEntry value="#FFFFFF" attributeValue="Complex"/>
                </discreteMapping>
            </visualProperty>
            <visualProperty name="NODE_SHAPE" default="ELLIPSE">
                <discreteMapping attributeType="string" attributeName="BIOPAX_TYPE">
                    <discreteMappingEntry value="ELLIPSE" attributeValue="SimplePhysicalEntity"/>
                    <discreteMappingEntry value="ELLIPSE" attributeValue="Rna"/>
                    <discreteMappingEntry value="RECTANGLE" attributeValue="BiochemicalReaction"/>
                    <discreteMappingEntry value="RECTANGLE" attributeValue="GeneticInteraction"/>
                    <discreteMappingEntry value="RECTANGLE" attributeValue="Interaction"/>
                    <discreteMappingEntry value="RECTANGLE" attributeValue="TransportWithBiochemicalReaction"/>
                    <discreteMappingEntry value="RECTANGLE" attributeValue="Conversion"/>
                    <discreteMappingEntry value="RECTANGLE" attributeValue="ComplexAssembly"/>
                    <discreteMappingEntry value="ELLIPSE" attributeValue="Protein"/>
                    <discreteMappingEntry value="DIAMOND" attributeValue="Complex"/>
                    <discreteMappingEntry value="ELLIPSE" attributeValue="RnaRegion"/>
                    <discreteMappingEntry value="RECTANGLE" attributeValue="Degradation"/>
                    <discreteMappingEntry value="TRIANGLE" attributeValue="TemplateReactionRegulation"/>
                    <discreteMappingEntry value="TRIANGLE" attributeValue="Control"/>
                    <discreteMappingEntry value="ELLIPSE" attributeValue="DnaRegion"/>
                    <discreteMappingEntry value="ELLIPSE" attributeValue="PhysicalEntity"/>
                    <discreteMappingEntry value="ELLIPSE" attributeValue="SmallMolecule"/>
                    <discreteMappingEntry value="ELLIPSE" attributeValue="Dna"/>
                    <discreteMappingEntry value="TRIANGLE" attributeValue="Modulation"/>
                    <discreteMappingEntry value="RECTANGLE" attributeValue="TemplateReaction"/>
                    <discreteMappingEntry value="RECTANGLE" attributeValue="MolecularInteraction"/>
                    <discreteMappingEntry value="TRIANGLE" attributeValue="Catalysis"/>
                    <discreteMappingEntry value="RECTANGLE" attributeValue="Transport"/>
                    <discreteMappingEntry value="ELLIPSE" attributeValue="Protein-phosphorylated"/>
                </discreteMapping>
            </visualProperty>
            <visualProperty name="NODE_HEIGHT" default="20.0">
                <discreteMapping attributeType="string" attributeName="BIOPAX_TYPE">
                    <discreteMappingEntry value="13.4" attributeValue="BiochemicalReaction"/>
                    <discreteMappingEntry value="13.4" attributeValue="GeneticInteraction"/>
                    <discreteMappingEntry value="13.4" attributeValue="Interaction"/>
                    <discreteMappingEntry value="13.4" attributeValue="TransportWithBiochemicalReaction"/>
                    <discreteMappingEntry value="13.4" attributeValue="Conversion"/>
                    <discreteMappingEntry value="13.4" attributeValue="ComplexAssembly"/>
                    <discreteMappingEntry value="13.4" attributeValue="Complex"/>
                    <discreteMappingEntry value="13.4" attributeValue="Degradation"/>
                    <discreteMappingEntry value="13.4" attributeValue="TemplateReactionRegulation"/>
                    <discreteMappingEntry value="13.4" attributeValue="Control"/>
                    <discreteMappingEntry value="13.4" attributeValue="Modulation"/>
                    <discreteMappingEntry value="13.4" attributeValue="TemplateReaction"/>
                    <discreteMappingEntry value="13.4" attributeValue="MolecularInteraction"/>
                    <discreteMappingEntry value="13.4" attributeValue="Catalysis"/>
                    <discreteMappingEntry value="13.4" attributeValue="Transport"/>
                </discreteMapping>
            </visualProperty>
            <visualProperty name="NODE_LABEL">
                <passthroughMapping attributeType="string" attributeName="name"/>
            </visualProperty>
        </node>
        <edge>
            <dependency name="arrowColorMatchesEdge" value="true"/>
            <visualProperty name="EDGE_TARGET_ARROW_SHAPE">
                <discreteMapping attributeType="string" attributeName="interaction">
                    <discreteMappingEntry value="T" attributeValue="INHIBITION_NONCOMPETITIVE"/>
                    <discreteMappingEntry value="T" attributeValue="INHIBITION_OTHER"/>
                    <discreteMappingEntry value="DELTA" attributeValue="ACTIVATION"/>
                    <discreteMappingEntry value="T" attributeValue="INHIBITION_UNCOMPETITIVE"/>
                    <discreteMappingEntry value="DELTA" attributeValue="cofactor"/>
                    <discreteMappingEntry value="DELTA" attributeValue="ACTIVATION_ALLOSTERIC"/>
                    <discreteMappingEntry value="DELTA" attributeValue="right"/>
                    <discreteMappingEntry value="T" attributeValue="INHIBITION_ALLOSTERIC"/>
                    <discreteMappingEntry value="DELTA" attributeValue="controlled"/>
                    <discreteMappingEntry value="CIRCLE" attributeValue="contains"/>
                    <discreteMappingEntry value="T" attributeValue="INHIBITION"/>
                    <discreteMappingEntry value="T" attributeValue="INHIBITION_UNKMECH"/>
                    <discreteMappingEntry value="T" attributeValue="INHIBITION_IRREVERSIBLE"/>
                    <discreteMappingEntry value="T" attributeValue="INHIBITION_COMPETITIVE"/>
                    <discreteMappingEntry value="DELTA" attributeValue="ACTIVATION_UNKMECH"/>
                    <discreteMappingEntry value="DELTA" attributeValue="ACTIVATION_NONALLOSTERIC"/>
                </discreteMapping>
            </visualProperty>
        </edge>
    </visualStyle>
    <visualStyle name="size_rank_4">
        <network>
            <visualProperty name="NETWORK_TITLE" default=""/>
            <visualProperty name="NETWORK_EDGE_SELECTION" default="true"/>
            <visualProperty name="NETWORK_SIZE" default="550.0"/>
            <visualProperty name="NETWORK_BACKGROUND_PAINT" default="#EBEBEB"/>
            <visualProperty name="NETWORK_WIDTH" default="550.0"/>
            <visualProperty name="NETWORK_NODE_SELECTION" default="true"/>
            <visualProperty name="NETWORK_CENTER_Z_LOCATION" default="0.0"/>
            <visualProperty name="NETWORK_CENTER_X_LOCATION" default="0.0"/>
            <visualProperty name="NETWORK_SCALE_FACTOR" default="1.0"/>
            <visualProperty name="NETWORK_DEPTH" default="0.0"/>
            <visualProperty name="NETWORK_HEIGHT" default="400.0"/>
            <visualProperty name="NETWORK_CENTER_Y_LOCATION" default="0.0"/>
        </network>
        <node>
            <dependency name="nodeCustomGraphicsSizeSync" value="true"/>
            <dependency name="nodeSizeLocked" value="true"/>
            <visualProperty name="NODE_CUSTOMGRAPHICS_POSITION_5" default="C,C,c,0.00,0.00"/>
            <visualProperty name="NODE_CUSTOMGRAPHICS_POSITION_6" default="C,C,c,0.00,0.00"/>
            <visualProperty name="NODE_CUSTOMPAINT_1" default="DefaultVisualizableVisualProperty(id=NODE_CUSTOMPAINT_1, name=Node Custom Paint 1)"/>
            <visualProperty name="NODE_BORDER_PAINT" default="#000000"/>
            <visualProperty name="NODE_CUSTOMGRAPHICS_SIZE_5" default="50.0"/>
            <visualProperty name="NODE_CUSTOMGRAPHICS_SIZE_8" default="50.0"/>
            <visualProperty name="NODE_CUSTOMGRAPHICS_8" default="org.cytoscape.ding.customgraphics.NullCustomGraphics,0,[ Remove Graphics ],"/>
            <visualProperty name="NODE_CUSTOMGRAPHICS_SIZE_7" default="50.0"/>
            <visualProperty name="NODE_CUSTOMPAINT_6" default="DefaultVisualizableVisualProperty(id=NODE_CUSTOMPAINT_6, name=Node Custom Paint 6)"/>
            <visualProperty name="NODE_CUSTOMGRAPHICS_SIZE_6" default="50.0"/>
            <visualProperty name="NODE_LABEL_WIDTH" default="200.0"/>
            <visualProperty name="NODE_CUSTOMGRAPHICS_POSITION_7" default="C,C,c,0.00,0.00"/>
            <visualProperty name="NODE_CUSTOMGRAPHICS_SIZE_9" default="50.0"/>
            <visualProperty name="NODE_SIZE" default="12.0">
                <continuousMapping attributeType="float" attributeName="diffusion_output__rank">
                    <continuousMappingPoint lesserValue="1.0" greaterValue="39.11245096536507" equalValue="39.11245096536507" attrValue="0.0"/>
                    <continuousMappingPoint lesserValue="13.821692732043733" greaterValue="1.0" equalValue="13.821692732043733" attrValue="99.0"/>
                </continuousMapping>
            </visualProperty>
            <visualProperty name="NODE_PAINT" default="#787878"/>
            <visualProperty name="NODE_CUSTOMGRAPHICS_SIZE_4" default="50.0"/>
            <visualProperty name="NODE_CUSTOMGRAPHICS_3" default="org.cytoscape.ding.customgraphics.NullCustomGraphics,0,[ Remove Graphics ],"/>
            <visualProperty name="NODE_LABEL_POSITION" default="C,C,c,0.00,0.00"/>
            <visualProperty name="NODE_CUSTOMGRAPHICS_POSITION_4" default="C,C,c,0.00,0.00"/>
            <visualProperty name="NODE_CUSTOMGRAPHICS_7" default="org.cytoscape.ding.customgraphics.NullCustomGraphics,0,[ Remove Graphics ],"/>
            <visualProperty name="NODE_Z_LOCATION" default="0.0"/>
            <visualProperty name="NODE_CUSTOMGRAPHICS_4" default="org.cytoscape.ding.customgraphics.NullCustomGraphics,0,[ Remove Graphics ],"/>
            <visualProperty name="NODE_CUSTOMGRAPHICS_POSITION_3" default="C,C,c,0.00,0.00"/>
            <visualProperty name="NODE_NESTED_NETWORK_IMAGE_VISIBLE" default="true"/>
            <visualProperty name="NODE_TRANSPARENCY" default="255"/>
            <visualProperty name="COMPOUND_NODE_PADDING" default="10.0"/>
            <visualProperty name="NODE_WIDTH" default="50.0"/>
            <visualProperty name="NODE_CUSTOMGRAPHICS_POSITION_8" default="C,C,c,0.00,0.00"/>
            <visualProperty name="NODE_CUSTOMGRAPHICS_1" default="org.cytoscape.ding.customgraphics.NullCustomGraphics,0,[ Remove Graphics ],"/>
            <visualProperty name="NODE_LABEL_FONT_SIZE" default="9"/>
            <visualProperty name="NODE_Y_LOCATION" default="0.0"/>
            <visualProperty name="NODE_LABEL_FONT_FACE" default="SansSerif.plain,plain,12"/>
            <visualProperty name="NODE_CUSTOMPAINT_4" default="DefaultVisualizableVisualProperty(id=NODE_CUSTOMPAINT_4, name=Node Custom Paint 4)"/>
            <visualProperty name="NODE_CUSTOMPAINT_7" default="DefaultVisualizableVisualProperty(id=NODE_CUSTOMPAINT_7, name=Node Custom Paint 7)"/>
            <visualProperty name="NODE_CUSTOMGRAPHICS_5" default="org.cytoscape.ding.customgraphics.NullCustomGraphics,0,[ Remove Graphics ],"/>
            <visualProperty name="NODE_CUSTOMGRAPHICS_SIZE_2" default="50.0"/>
            <visualProperty name="NODE_BORDER_STROKE" default="SOLID"/>
            <visualProperty name="NODE_LABEL_TRANSPARENCY" default="255"/>
            <visualProperty name="NODE_TOOLTIP" default=""/>
            <visualProperty name="NODE_SELECTED_PAINT" default="#FFFF00"/>
            <visualProperty name="NODE_FILL_COLOR" default="#CCCCFF"/>
            <visualProperty name="NODE_CUSTOMGRAPHICS_POSITION_1" default="C,C,c,0.00,0.00"/>
            <visualProperty name="NODE_CUSTOMGRAPHICS_POSITION_2" default="C,C,c,0.00,0.00"/>
            <visualProperty name="NODE_CUSTOMGRAPHICS_SIZE_3" default="50.0"/>
            <visualProperty name="NODE_BORDER_TRANSPARENCY" default="255"/>
            <visualProperty name="NODE_CUSTOMPAINT_2" default="DefaultVisualizableVisualProperty(id=NODE_CUSTOMPAINT_2, name=Node Custom Paint 2)"/>
            <visualProperty name="NODE_CUSTOMGRAPHICS_9" default="org.cytoscape.ding.customgraphics.NullCustomGraphics,0,[ Remove Graphics ],"/>
            <visualProperty name="NODE_CUSTOMGRAPHICS_SIZE_1" default="50.0"/>
            <visualProperty name="NODE_SELECTED" default="false"/>
            <visualProperty name="NODE_CUSTOMPAINT_8" default="DefaultVisualizableVisualProperty(id=NODE_CUSTOMPAINT_8, name=Node Custom Paint 8)"/>
            <visualProperty name="NODE_X_LOCATION" default="0.0"/>
            <visualProperty name="NODE_CUSTOMGRAPHICS_6" default="org.cytoscape.ding.customgraphics.NullCustomGraphics,0,[ Remove Graphics ],"/>
            <visualProperty name="NODE_SHAPE" default="RECTANGLE"/>
            <visualProperty name="NODE_HEIGHT" default="50.0"/>
            <visualProperty name="NODE_LABEL" default="">
                <passthroughMapping attributeType="string" attributeName="name"/>
            </visualProperty>
            <visualProperty name="NODE_CUSTOMGRAPHICS_2" default="org.cytoscape.ding.customgraphics.NullCustomGraphics,0,[ Remove Graphics ],"/>
            <visualProperty name="NODE_BORDER_WIDTH" default="0.0"/>
            <visualProperty name="NODE_CUSTOMGRAPHICS_POSITION_9" default="C,C,c,0.00,0.00"/>
            <visualProperty name="NODE_CUSTOMPAINT_3" default="DefaultVisualizableVisualProperty(id=NODE_CUSTOMPAINT_3, name=Node Custom Paint 3)"/>
            <visualProperty name="NODE_VISIBLE" default="true"/>
            <visualProperty name="NODE_CUSTOMPAINT_5" default="DefaultVisualizableVisualProperty(id=NODE_CUSTOMPAINT_5, name=Node Custom Paint 5)"/>
            <visualProperty name="NODE_CUSTOMPAINT_9" default="DefaultVisualizableVisualProperty(id=NODE_CUSTOMPAINT_9, name=Node Custom Paint 9)"/>
            <visualProperty name="NODE_DEPTH" default="0.0"/>
            <visualProperty name="COMPOUND_NODE_SHAPE" default="ROUND_RECTANGLE"/>
            <visualProperty name="NODE_LABEL_COLOR" default="#333333"/>
        </node>
        <edge>
            <dependency name="arrowColorMatchesEdge" value="false"/>
            <visualProperty name="EDGE_VISIBLE" default="true"/>
            <visualProperty name="EDGE_LABEL_COLOR" default="#000000"/>
            <visualProperty name="EDGE_STROKE_SELECTED_PAINT" default="#FF0000"/>
            <visualProperty name="EDGE_CURVED" default="true"/>
            <visualProperty name="EDGE_SELECTED" default="false"/>
            <visualProperty name="EDGE_LABEL" default=""/>
            <visualProperty name="EDGE_STROKE_UNSELECTED_PAINT" default="#4C4C4C"/>
            <visualProperty name="EDGE_LABEL_WIDTH" default="200.0"/>
            <visualProperty name="EDGE_TRANSPARENCY" default="255"/>
            <visualProperty name="EDGE_UNSELECTED_PAINT" default="#404040"/>
            <visualProperty name="EDGE_LABEL_FONT_FACE" default="SansSerif.plain,plain,10"/>
            <visualProperty name="EDGE_LINE_TYPE" default="SOLID"/>
            <visualProperty name="EDGE_SOURCE_ARROW_SELECTED_PAINT" default="#FFFF00"/>
            <visualProperty name="EDGE_LABEL_FONT_SIZE" default="10"/>
            <visualProperty name="EDGE_SOURCE_ARROW_UNSELECTED_PAINT" default="#000000"/>
            <visualProperty name="EDGE_WIDTH" default="2.0"/>
            <visualProperty name="EDGE_PAINT" default="#808080"/>
            <visualProperty name="EDGE_TARGET_ARROW_UNSELECTED_PAINT" default="#000000"/>
            <visualProperty name="EDGE_LABEL_TRANSPARENCY" default="255"/>
            <visualProperty name="EDGE_TOOLTIP" default=""/>
            <visualProperty name="EDGE_TARGET_ARROW_SHAPE" default="NONE"/>
            <visualProperty name="EDGE_SELECTED_PAINT" default="#FF0000"/>
            <visualProperty name="EDGE_BEND" default=""/>
            <visualProperty name="EDGE_TARGET_ARROW_SELECTED_PAINT" default="#FFFF00"/>
            <visualProperty name="EDGE_SOURCE_ARROW_SHAPE" default="NONE"/>
        </edge>
    </visualStyle>
    <visualStyle name="Marquee">
        <network>
            <visualProperty name="NETWORK_TITLE" default=""/>
            <visualProperty name="NETWORK_EDGE_SELECTION" default="true"/>
            <visualProperty name="NETWORK_SIZE" default="550.0"/>
            <visualProperty name="NETWORK_BACKGROUND_PAINT" default="#DCD7CA"/>
            <visualProperty name="NETWORK_WIDTH" default="550.0"/>
            <visualProperty name="NETWORK_NODE_SELECTION" default="true"/>
            <visualProperty name="NETWORK_CENTER_Z_LOCATION" default="0.0"/>
            <visualProperty name="NETWORK_CENTER_X_LOCATION" default="0.0"/>
            <visualProperty name="NETWORK_SCALE_FACTOR" default="1.0"/>
            <visualProperty name="NETWORK_DEPTH" default="0.0"/>
            <visualProperty name="NETWORK_HEIGHT" default="400.0"/>
            <visualProperty name="NETWORK_CENTER_Y_LOCATION" default="0.0"/>
        </network>
        <node>
            <dependency name="nodeCustomGraphicsSizeSync" value="true"/>
            <dependency name="nodeSizeLocked" value="true"/>
            <visualProperty name="NODE_CUSTOMGRAPHICS_POSITION_5" default="C,C,c,0.00,0.00"/>
            <visualProperty name="NODE_CUSTOMGRAPHICS_POSITION_6" default="C,C,c,0.00,0.00"/>
            <visualProperty name="NODE_CUSTOMPAINT_1" default="DefaultVisualizableVisualProperty(id=NODE_CUSTOMPAINT_1, name=Node Custom Paint 1)"/>
            <visualProperty name="NODE_BORDER_PAINT" default="#FFFFFF"/>
            <visualProperty name="NODE_CUSTOMGRAPHICS_SIZE_5" default="50.0"/>
            <visualProperty name="NODE_CUSTOMGRAPHICS_SIZE_8" default="50.0"/>
            <visualProperty name="NODE_CUSTOMGRAPHICS_8" default="org.cytoscape.ding.customgraphics.NullCustomGraphics,0,[ Remove Graphics ],"/>
            <visualProperty name="NODE_CUSTOMGRAPHICS_SIZE_7" default="50.0"/>
            <visualProperty name="NODE_CUSTOMPAINT_6" default="DefaultVisualizableVisualProperty(id=NODE_CUSTOMPAINT_6, name=Node Custom Paint 6)"/>
            <visualProperty name="NODE_CUSTOMGRAPHICS_SIZE_6" default="50.0"/>
            <visualProperty name="NODE_LABEL_WIDTH" default="200.0"/>
            <visualProperty name="NODE_CUSTOMGRAPHICS_POSITION_7" default="C,C,c,0.00,0.00"/>
            <visualProperty name="NODE_CUSTOMGRAPHICS_SIZE_9" default="50.0"/>
            <visualProperty name="NODE_SIZE" default="20.0"/>
            <visualProperty name="NODE_PAINT" default="#787878"/>
            <visualProperty name="NODE_CUSTOMGRAPHICS_SIZE_4" default="50.0"/>
            <visualProperty name="NODE_CUSTOMGRAPHICS_3" default="org.cytoscape.ding.customgraphics.NullCustomGraphics,0,[ Remove Graphics ],"/>
            <visualProperty name="NODE_LABEL_POSITION" default="S,N,c,0.00,0.00"/>
            <visualProperty name="NODE_CUSTOMGRAPHICS_POSITION_4" default="C,C,c,0.00,0.00"/>
            <visualProperty name="NODE_CUSTOMGRAPHICS_7" default="org.cytoscape.ding.customgraphics.NullCustomGraphics,0,[ Remove Graphics ],"/>
            <visualProperty name="NODE_Z_LOCATION" default="0.0"/>
            <visualProperty name="NODE_CUSTOMGRAPHICS_4" default="org.cytoscape.ding.customgraphics.NullCustomGraphics,0,[ Remove Graphics ],"/>
            <visualProperty name="NODE_CUSTOMGRAPHICS_POSITION_3" default="C,C,c,0.00,0.00"/>
            <visualProperty name="NODE_NESTED_NETWORK_IMAGE_VISIBLE" default="true"/>
            <visualProperty name="NODE_TRANSPARENCY" default="255"/>
            <visualProperty name="COMPOUND_NODE_PADDING" default="10.0"/>
            <visualProperty name="NODE_WIDTH" default="50.0"/>
            <visualProperty name="NODE_CUSTOMGRAPHICS_POSITION_8" default="C,C,c,0.00,0.00"/>
            <visualProperty name="NODE_CUSTOMGRAPHICS_1" default="org.cytoscape.ding.customgraphics.NullCustomGraphics,0,[ Remove Graphics ],"/>
            <visualProperty name="NODE_LABEL_FONT_SIZE" default="12"/>
            <visualProperty name="NODE_Y_LOCATION" default="0.0"/>
            <visualProperty name="NODE_LABEL_FONT_FACE" default="SansSerif.plain,plain,12"/>
            <visualProperty name="NODE_CUSTOMPAINT_4" default="DefaultVisualizableVisualProperty(id=NODE_CUSTOMPAINT_4, name=Node Custom Paint 4)"/>
            <visualProperty name="NODE_CUSTOMPAINT_7" default="DefaultVisualizableVisualProperty(id=NODE_CUSTOMPAINT_7, name=Node Custom Paint 7)"/>
            <visualProperty name="NODE_CUSTOMGRAPHICS_5" default="org.cytoscape.ding.customgraphics.NullCustomGraphics,0,[ Remove Graphics ],"/>
            <visualProperty name="NODE_CUSTOMGRAPHICS_SIZE_2" default="50.0"/>
            <visualProperty name="NODE_BORDER_STROKE" default="SOLID"/>
            <visualProperty name="NODE_LABEL_TRANSPARENCY" default="255"/>
            <visualProperty name="NODE_TOOLTIP" default=""/>
            <visualProperty name="NODE_SELECTED_PAINT" default="#FF0066"/>
            <visualProperty name="NODE_FILL_COLOR" default="#00CCFF"/>
            <visualProperty name="NODE_CUSTOMGRAPHICS_POSITION_1" default="C,C,c,0.00,0.00"/>
            <visualProperty name="NODE_CUSTOMGRAPHICS_POSITION_2" default="C,C,c,0.00,0.00"/>
            <visualProperty name="NODE_CUSTOMGRAPHICS_SIZE_3" default="50.0"/>
            <visualProperty name="NODE_BORDER_TRANSPARENCY" default="255"/>
            <visualProperty name="NODE_CUSTOMPAINT_2" default="DefaultVisualizableVisualProperty(id=NODE_CUSTOMPAINT_2, name=Node Custom Paint 2)"/>
            <visualProperty name="NODE_CUSTOMGRAPHICS_9" default="org.cytoscape.ding.customgraphics.NullCustomGraphics,0,[ Remove Graphics ],"/>
            <visualProperty name="NODE_CUSTOMGRAPHICS_SIZE_1" default="50.0"/>
            <visualProperty name="NODE_SELECTED" default="false"/>
            <visualProperty name="NODE_CUSTOMPAINT_8" default="DefaultVisualizableVisualProperty(id=NODE_CUSTOMPAINT_8, name=Node Custom Paint 8)"/>
            <visualProperty name="NODE_X_LOCATION" default="0.0"/>
            <visualProperty name="NODE_CUSTOMGRAPHICS_6" default="org.cytoscape.ding.customgraphics.NullCustomGraphics,0,[ Remove Graphics ],"/>
            <visualProperty name="NODE_SHAPE" default="ELLIPSE"/>
            <visualProperty name="NODE_HEIGHT" default="50.0"/>
            <visualProperty name="NODE_LABEL" default="">
                <passthroughMapping attributeType="string" attributeName="name"/>
            </visualProperty>
            <visualProperty name="NODE_CUSTOMGRAPHICS_2" default="org.cytoscape.ding.customgraphics.NullCustomGraphics,0,[ Remove Graphics ],"/>
            <visualProperty name="NODE_BORDER_WIDTH" default="10.0"/>
            <visualProperty name="NODE_CUSTOMGRAPHICS_POSITION_9" default="C,C,c,0.00,0.00"/>
            <visualProperty name="NODE_CUSTOMPAINT_3" default="DefaultVisualizableVisualProperty(id=NODE_CUSTOMPAINT_3, name=Node Custom Paint 3)"/>
            <visualProperty name="NODE_VISIBLE" default="true"/>
            <visualProperty name="NODE_CUSTOMPAINT_5" default="DefaultVisualizableVisualProperty(id=NODE_CUSTOMPAINT_5, name=Node Custom Paint 5)"/>
            <visualProperty name="NODE_CUSTOMPAINT_9" default="DefaultVisualizableVisualProperty(id=NODE_CUSTOMPAINT_9, name=Node Custom Paint 9)"/>
            <visualProperty name="NODE_DEPTH" default="0.0"/>
            <visualProperty name="COMPOUND_NODE_SHAPE" default="ROUND_RECTANGLE"/>
            <visualProperty name="NODE_LABEL_COLOR" default="#666666"/>
        </node>
        <edge>
            <dependency name="arrowColorMatchesEdge" value="true"/>
            <visualProperty name="EDGE_VISIBLE" default="true"/>
            <visualProperty name="EDGE_LABEL_COLOR" default="#666666"/>
            <visualProperty name="EDGE_STROKE_SELECTED_PAINT" default="#FF0000"/>
            <visualProperty name="EDGE_CURVED" default="true"/>
            <visualProperty name="EDGE_SELECTED" default="false"/>
            <visualProperty name="EDGE_LABEL" default="">
                <passthroughMapping attributeType="string" attributeName="interaction"/>
            </visualProperty>
            <visualProperty name="EDGE_STROKE_UNSELECTED_PAINT" default="#969696"/>
            <visualProperty name="EDGE_LABEL_WIDTH" default="200.0"/>
            <visualProperty name="EDGE_TRANSPARENCY" default="255"/>
            <visualProperty name="EDGE_UNSELECTED_PAINT" default="#FFFFFF"/>
            <visualProperty name="EDGE_LABEL_FONT_FACE" default="SansSerif.plain,plain,12"/>
            <visualProperty name="EDGE_LINE_TYPE" default="MARQUEE_EQUAL"/>
            <visualProperty name="EDGE_SOURCE_ARROW_SELECTED_PAINT" default="#FFFF00"/>
            <visualProperty name="EDGE_LABEL_FONT_SIZE" default="8"/>
            <visualProperty name="EDGE_SOURCE_ARROW_UNSELECTED_PAINT" default="#000000"/>
            <visualProperty name="EDGE_TARGET_ARROW_SIZE" default="6.0"/>
            <visualProperty name="EDGE_WIDTH" default="2.0"/>
            <visualProperty name="EDGE_PAINT" default="#808080"/>
            <visualProperty name="EDGE_TARGET_ARROW_UNSELECTED_PAINT" default="#333333"/>
            <visualProperty name="EDGE_LABEL_TRANSPARENCY" default="255"/>
            <visualProperty name="EDGE_TOOLTIP" default=""/>
            <visualProperty name="EDGE_TARGET_ARROW_SHAPE" default="ARROW"/>
            <visualProperty name="EDGE_SOURCE_ARROW_SIZE" default="6.0"/>
            <visualProperty name="EDGE_SELECTED_PAINT" default="#FF0000"/>
            <visualProperty name="EDGE_BEND" default=""/>
            <visualProperty name="EDGE_TARGET_ARROW_SELECTED_PAINT" default="#FFFF00"/>
            <visualProperty name="EDGE_SOURCE_ARROW_SHAPE" default="NONE"/>
        </edge>
    </visualStyle>
    <visualStyle name="default">
        <network>
            <visualProperty name="NETWORK_TITLE" default=""/>
            <visualProperty name="NETWORK_EDGE_SELECTION" default="true"/>
            <visualProperty name="NETWORK_SIZE" default="550.0"/>
            <visualProperty name="NETWORK_BACKGROUND_PAINT" default="#FFFFFF"/>
            <visualProperty name="NETWORK_WIDTH" default="550.0"/>
            <visualProperty name="NETWORK_NODE_SELECTION" default="true"/>
            <visualProperty name="NETWORK_CENTER_Z_LOCATION" default="0.0"/>
            <visualProperty name="NETWORK_CENTER_X_LOCATION" default="0.0"/>
            <visualProperty name="NETWORK_SCALE_FACTOR" default="1.0"/>
            <visualProperty name="NETWORK_DEPTH" default="0.0"/>
            <visualProperty name="NETWORK_HEIGHT" default="400.0"/>
            <visualProperty name="NETWORK_CENTER_Y_LOCATION" default="0.0"/>
        </network>
        <node>
            <dependency name="nodeCustomGraphicsSizeSync" value="true"/>
            <dependency name="nodeSizeLocked" value="false"/>
            <visualProperty name="NODE_CUSTOMGRAPHICS_POSITION_5" default="C,C,c,0.00,0.00"/>
            <visualProperty name="NODE_CUSTOMGRAPHICS_POSITION_6" default="C,C,c,0.00,0.00"/>
            <visualProperty name="NODE_CUSTOMPAINT_1" default="DefaultVisualizableVisualProperty(id=NODE_CUSTOMPAINT_1, name=Node Custom Paint 1)"/>
            <visualProperty name="NODE_BORDER_PAINT" default="#CCCCCC"/>
            <visualProperty name="NODE_CUSTOMGRAPHICS_SIZE_5" default="50.0"/>
            <visualProperty name="NODE_CUSTOMGRAPHICS_SIZE_8" default="50.0"/>
            <visualProperty name="NODE_CUSTOMGRAPHICS_8" default="org.cytoscape.ding.customgraphics.NullCustomGraphics,0,[ Remove Graphics ],"/>
            <visualProperty name="NODE_CUSTOMGRAPHICS_SIZE_7" default="50.0"/>
            <visualProperty name="NODE_CUSTOMPAINT_6" default="DefaultVisualizableVisualProperty(id=NODE_CUSTOMPAINT_6, name=Node Custom Paint 6)"/>
            <visualProperty name="NODE_CUSTOMGRAPHICS_SIZE_6" default="50.0"/>
            <visualProperty name="NODE_LABEL_WIDTH" default="200.0"/>
            <visualProperty name="NODE_CUSTOMGRAPHICS_POSITION_7" default="C,C,c,0.00,0.00"/>
            <visualProperty name="NODE_CUSTOMGRAPHICS_SIZE_9" default="50.0"/>
            <visualProperty name="NODE_SIZE" default="35.0"/>
            <visualProperty name="NODE_PAINT" default="#1E90FF"/>
            <visualProperty name="NODE_CUSTOMGRAPHICS_SIZE_4" default="50.0"/>
            <visualProperty name="NODE_CUSTOMGRAPHICS_3" default="org.cytoscape.ding.customgraphics.NullCustomGraphics,0,[ Remove Graphics ],"/>
            <visualProperty name="NODE_LABEL_POSITION" default="C,C,c,0.00,0.00"/>
            <visualProperty name="NODE_CUSTOMGRAPHICS_POSITION_4" default="C,C,c,0.00,0.00"/>
            <visualProperty name="NODE_CUSTOMGRAPHICS_7" default="org.cytoscape.ding.customgraphics.NullCustomGraphics,0,[ Remove Graphics ],"/>
            <visualProperty name="NODE_Z_LOCATION" default="0.0"/>
            <visualProperty name="NODE_CUSTOMGRAPHICS_4" default="org.cytoscape.ding.customgraphics.NullCustomGraphics,0,[ Remove Graphics ],"/>
            <visualProperty name="NODE_CUSTOMGRAPHICS_POSITION_3" default="C,C,c,0.00,0.00"/>
            <visualProperty name="NODE_NESTED_NETWORK_IMAGE_VISIBLE" default="true"/>
            <visualProperty name="NODE_TRANSPARENCY" default="255"/>
            <visualProperty name="COMPOUND_NODE_PADDING" default="10.0"/>
            <visualProperty name="NODE_WIDTH" default="75.0"/>
            <visualProperty name="NODE_CUSTOMGRAPHICS_POSITION_8" default="C,C,c,0.00,0.00"/>
            <visualProperty name="NODE_CUSTOMGRAPHICS_1" default="org.cytoscape.ding.customgraphics.NullCustomGraphics,0,[ Remove Graphics ],"/>
            <visualProperty name="NODE_LABEL_FONT_SIZE" default="12"/>
            <visualProperty name="NODE_Y_LOCATION" default="0.0"/>
            <visualProperty name="NODE_LABEL_FONT_FACE" default="SansSerif.plain,plain,12"/>
            <visualProperty name="NODE_CUSTOMPAINT_4" default="DefaultVisualizableVisualProperty(id=NODE_CUSTOMPAINT_4, name=Node Custom Paint 4)"/>
            <visualProperty name="NODE_CUSTOMPAINT_7" default="DefaultVisualizableVisualProperty(id=NODE_CUSTOMPAINT_7, name=Node Custom Paint 7)"/>
            <visualProperty name="NODE_CUSTOMGRAPHICS_5" default="org.cytoscape.ding.customgraphics.NullCustomGraphics,0,[ Remove Graphics ],"/>
            <visualProperty name="NODE_CUSTOMGRAPHICS_SIZE_2" default="50.0"/>
            <visualProperty name="NODE_BORDER_STROKE" default="SOLID"/>
            <visualProperty name="NODE_LABEL_TRANSPARENCY" default="255"/>
            <visualProperty name="NODE_TOOLTIP" default=""/>
            <visualProperty name="NODE_SELECTED_PAINT" default="#FFFF00"/>
            <visualProperty name="NODE_FILL_COLOR" default="#89D0F5"/>
            <visualProperty name="NODE_CUSTOMGRAPHICS_POSITION_1" default="C,C,c,0.00,0.00"/>
            <visualProperty name="NODE_CUSTOMGRAPHICS_POSITION_2" default="C,C,c,0.00,0.00"/>
            <visualProperty name="NODE_CUSTOMGRAPHICS_SIZE_3" default="50.0"/>
            <visualProperty name="NODE_BORDER_TRANSPARENCY" default="255"/>
            <visualProperty name="NODE_CUSTOMPAINT_2" default="DefaultVisualizableVisualProperty(id=NODE_CUSTOMPAINT_2, name=Node Custom Paint 2)"/>
            <visualProperty name="NODE_CUSTOMGRAPHICS_9" default="org.cytoscape.ding.customgraphics.NullCustomGraphics,0,[ Remove Graphics ],"/>
            <visualProperty name="NODE_CUSTOMGRAPHICS_SIZE_1" default="50.0"/>
            <visualProperty name="NODE_SELECTED" default="false"/>
            <visualProperty name="NODE_CUSTOMPAINT_8" default="DefaultVisualizableVisualProperty(id=NODE_CUSTOMPAINT_8, name=Node Custom Paint 8)"/>
            <visualProperty name="NODE_X_LOCATION" default="0.0"/>
            <visualProperty name="NODE_CUSTOMGRAPHICS_6" default="org.cytoscape.ding.customgraphics.NullCustomGraphics,0,[ Remove Graphics ],"/>
            <visualProperty name="NODE_SHAPE" default="ROUND_RECTANGLE"/>
            <visualProperty name="NODE_HEIGHT" default="35.0"/>
            <visualProperty name="NODE_LABEL" default="">
                <passthroughMapping attributeType="string" attributeName="name"/>
            </visualProperty>
            <visualProperty name="NODE_CUSTOMGRAPHICS_2" default="org.cytoscape.ding.customgraphics.NullCustomGraphics,0,[ Remove Graphics ],"/>
            <visualProperty name="NODE_BORDER_WIDTH" default="0.0"/>
            <visualProperty name="NODE_CUSTOMGRAPHICS_POSITION_9" default="C,C,c,0.00,0.00"/>
            <visualProperty name="NODE_CUSTOMPAINT_3" default="DefaultVisualizableVisualProperty(id=NODE_CUSTOMPAINT_3, name=Node Custom Paint 3)"/>
            <visualProperty name="NODE_VISIBLE" default="true"/>
            <visualProperty name="NODE_CUSTOMPAINT_5" default="DefaultVisualizableVisualProperty(id=NODE_CUSTOMPAINT_5, name=Node Custom Paint 5)"/>
            <visualProperty name="NODE_CUSTOMPAINT_9" default="DefaultVisualizableVisualProperty(id=NODE_CUSTOMPAINT_9, name=Node Custom Paint 9)"/>
            <visualProperty name="NODE_DEPTH" default="0.0"/>
            <visualProperty name="COMPOUND_NODE_SHAPE" default="ROUND_RECTANGLE"/>
            <visualProperty name="NODE_LABEL_COLOR" default="#000000"/>
        </node>
        <edge>
            <dependency name="arrowColorMatchesEdge" value="false"/>
            <visualProperty name="EDGE_VISIBLE" default="true"/>
            <visualProperty name="EDGE_LABEL_COLOR" default="#000000"/>
            <visualProperty name="EDGE_STROKE_SELECTED_PAINT" default="#FF0000"/>
            <visualProperty name="EDGE_CURVED" default="true"/>
            <visualProperty name="EDGE_SELECTED" default="false"/>
            <visualProperty name="EDGE_LABEL" default=""/>
            <visualProperty name="EDGE_STROKE_UNSELECTED_PAINT" default="#848484"/>
            <visualProperty name="EDGE_LABEL_WIDTH" default="200.0"/>
            <visualProperty name="EDGE_TRANSPARENCY" default="255"/>
            <visualProperty name="EDGE_UNSELECTED_PAINT" default="#404040"/>
            <visualProperty name="EDGE_LABEL_FONT_FACE" default="Dialog.plain,plain,10"/>
            <visualProperty name="EDGE_LINE_TYPE" default="SOLID"/>
            <visualProperty name="EDGE_SOURCE_ARROW_SELECTED_PAINT" default="#FFFF00"/>
            <visualProperty name="EDGE_LABEL_FONT_SIZE" default="10"/>
            <visualProperty name="EDGE_SOURCE_ARROW_UNSELECTED_PAINT" default="#000000"/>
            <visualProperty name="EDGE_TARGET_ARROW_SIZE" default="6.0"/>
            <visualProperty name="EDGE_WIDTH" default="2.0"/>
            <visualProperty name="EDGE_PAINT" default="#323232"/>
            <visualProperty name="EDGE_TARGET_ARROW_UNSELECTED_PAINT" default="#000000"/>
            <visualProperty name="EDGE_LABEL_TRANSPARENCY" default="255"/>
            <visualProperty name="EDGE_TOOLTIP" default=""/>
            <visualProperty name="EDGE_TARGET_ARROW_SHAPE" default="NONE"/>
            <visualProperty name="EDGE_SOURCE_ARROW_SIZE" default="6.0"/>
            <visualProperty name="EDGE_SELECTED_PAINT" default="#FF0000"/>
            <visualProperty name="EDGE_BEND" default=""/>
            <visualProperty name="EDGE_TARGET_ARROW_SELECTED_PAINT" default="#FFFF00"/>
            <visualProperty name="EDGE_SOURCE_ARROW_SHAPE" default="NONE"/>
        </edge>
    </visualStyle>
    <visualStyle name="Sample1">
        <network>
            <visualProperty name="NETWORK_TITLE" default=""/>
            <visualProperty name="NETWORK_EDGE_SELECTION" default="true"/>
            <visualProperty name="NETWORK_SIZE" default="550.0"/>
            <visualProperty name="NETWORK_BACKGROUND_PAINT" default="#FFFFFF"/>
            <visualProperty name="NETWORK_WIDTH" default="550.0"/>
            <visualProperty name="NETWORK_NODE_SELECTION" default="true"/>
            <visualProperty name="NETWORK_CENTER_Z_LOCATION" default="0.0"/>
            <visualProperty name="NETWORK_CENTER_X_LOCATION" default="0.0"/>
            <visualProperty name="NETWORK_SCALE_FACTOR" default="1.0"/>
            <visualProperty name="NETWORK_DEPTH" default="0.0"/>
            <visualProperty name="NETWORK_HEIGHT" default="400.0"/>
            <visualProperty name="NETWORK_CENTER_Y_LOCATION" default="0.0"/>
        </network>
        <node>
            <dependency name="nodeCustomGraphicsSizeSync" value="true"/>
            <dependency name="nodeSizeLocked" value="true"/>
            <visualProperty name="NODE_CUSTOMGRAPHICS_POSITION_5" default="C,C,c,0.00,0.00"/>
            <visualProperty name="NODE_CUSTOMGRAPHICS_POSITION_6" default="C,C,c,0.00,0.00"/>
            <visualProperty name="NODE_CUSTOMPAINT_1" default="DefaultVisualizableVisualProperty(id=NODE_CUSTOMPAINT_1, name=Node Custom Paint 1)"/>
            <visualProperty name="NODE_BORDER_PAINT" default="#000000"/>
            <visualProperty name="NODE_CUSTOMGRAPHICS_SIZE_5" default="50.0"/>
            <visualProperty name="NODE_CUSTOMGRAPHICS_SIZE_8" default="50.0"/>
            <visualProperty name="NODE_CUSTOMGRAPHICS_8" default="org.cytoscape.ding.customgraphics.NullCustomGraphics,0,[ Remove Graphics ],"/>
            <visualProperty name="NODE_CUSTOMGRAPHICS_SIZE_7" default="50.0"/>
            <visualProperty name="NODE_CUSTOMPAINT_6" default="DefaultVisualizableVisualProperty(id=NODE_CUSTOMPAINT_6, name=Node Custom Paint 6)"/>
            <visualProperty name="NODE_CUSTOMGRAPHICS_SIZE_6" default="50.0"/>
            <visualProperty name="NODE_LABEL_WIDTH" default="200.0"/>
            <visualProperty name="NODE_CUSTOMGRAPHICS_POSITION_7" default="C,C,c,0.00,0.00"/>
            <visualProperty name="NODE_CUSTOMGRAPHICS_SIZE_9" default="50.0"/>
            <visualProperty name="NODE_SIZE" default="25.0"/>
            <visualProperty name="NODE_PAINT" default="#787878"/>
            <visualProperty name="NODE_CUSTOMGRAPHICS_SIZE_4" default="50.0"/>
            <visualProperty name="NODE_CUSTOMGRAPHICS_3" default="org.cytoscape.ding.customgraphics.NullCustomGraphics,0,[ Remove Graphics ],"/>
            <visualProperty name="NODE_LABEL_POSITION" default="C,C,c,0.00,0.00"/>
            <visualProperty name="NODE_CUSTOMGRAPHICS_POSITION_4" default="C,C,c,0.00,0.00"/>
            <visualProperty name="NODE_CUSTOMGRAPHICS_7" default="org.cytoscape.ding.customgraphics.NullCustomGraphics,0,[ Remove Graphics ],"/>
            <visualProperty name="NODE_Z_LOCATION" default="0.0"/>
            <visualProperty name="NODE_CUSTOMGRAPHICS_4" default="org.cytoscape.ding.customgraphics.NullCustomGraphics,0,[ Remove Graphics ],"/>
            <visualProperty name="NODE_CUSTOMGRAPHICS_POSITION_3" default="C,C,c,0.00,0.00"/>
            <visualProperty name="NODE_NESTED_NETWORK_IMAGE_VISIBLE" default="true"/>
            <visualProperty name="NODE_TRANSPARENCY" default="255"/>
            <visualProperty name="COMPOUND_NODE_PADDING" default="10.0"/>
            <visualProperty name="NODE_WIDTH" default="70.0"/>
            <visualProperty name="NODE_CUSTOMGRAPHICS_POSITION_8" default="C,C,c,0.00,0.00"/>
            <visualProperty name="NODE_CUSTOMGRAPHICS_1" default="org.cytoscape.ding.customgraphics.NullCustomGraphics,0,[ Remove Graphics ],"/>
            <visualProperty name="NODE_LABEL_FONT_SIZE" default="10"/>
            <visualProperty name="NODE_Y_LOCATION" default="0.0"/>
            <visualProperty name="NODE_LABEL_FONT_FACE" default="Dialog.plain,plain,12"/>
            <visualProperty name="NODE_CUSTOMPAINT_4" default="DefaultVisualizableVisualProperty(id=NODE_CUSTOMPAINT_4, name=Node Custom Paint 4)"/>
            <visualProperty name="NODE_CUSTOMPAINT_7" default="DefaultVisualizableVisualProperty(id=NODE_CUSTOMPAINT_7, name=Node Custom Paint 7)"/>
            <visualProperty name="NODE_CUSTOMGRAPHICS_5" default="org.cytoscape.ding.customgraphics.NullCustomGraphics,0,[ Remove Graphics ],"/>
            <visualProperty name="NODE_CUSTOMGRAPHICS_SIZE_2" default="50.0"/>
            <visualProperty name="NODE_BORDER_STROKE" default="SOLID"/>
            <visualProperty name="NODE_LABEL_TRANSPARENCY" default="255"/>
            <visualProperty name="NODE_TOOLTIP" default=""/>
            <visualProperty name="NODE_SELECTED_PAINT" default="#FFFF00"/>
            <visualProperty name="NODE_FILL_COLOR" default="#7FCDBB"/>
            <visualProperty name="NODE_CUSTOMGRAPHICS_POSITION_1" default="C,C,c,0.00,0.00"/>
            <visualProperty name="NODE_CUSTOMGRAPHICS_POSITION_2" default="C,C,c,0.00,0.00"/>
            <visualProperty name="NODE_CUSTOMGRAPHICS_SIZE_3" default="50.0"/>
            <visualProperty name="NODE_BORDER_TRANSPARENCY" default="255"/>
            <visualProperty name="NODE_CUSTOMPAINT_2" default="DefaultVisualizableVisualProperty(id=NODE_CUSTOMPAINT_2, name=Node Custom Paint 2)"/>
            <visualProperty name="NODE_CUSTOMGRAPHICS_9" default="org.cytoscape.ding.customgraphics.NullCustomGraphics,0,[ Remove Graphics ],"/>
            <visualProperty name="NODE_CUSTOMGRAPHICS_SIZE_1" default="50.0"/>
            <visualProperty name="NODE_SELECTED" default="false"/>
            <visualProperty name="NODE_CUSTOMPAINT_8" default="DefaultVisualizableVisualProperty(id=NODE_CUSTOMPAINT_8, name=Node Custom Paint 8)"/>
            <visualProperty name="NODE_X_LOCATION" default="0.0"/>
            <visualProperty name="NODE_CUSTOMGRAPHICS_6" default="org.cytoscape.ding.customgraphics.NullCustomGraphics,0,[ Remove Graphics ],"/>
            <visualProperty name="NODE_SHAPE" default="ELLIPSE"/>
            <visualProperty name="NODE_HEIGHT" default="30.0"/>
            <visualProperty name="NODE_LABEL" default="">
                <passthroughMapping attributeType="string" attributeName="name"/>
            </visualProperty>
            <visualProperty name="NODE_CUSTOMGRAPHICS_2" default="org.cytoscape.ding.customgraphics.NullCustomGraphics,0,[ Remove Graphics ],"/>
            <visualProperty name="NODE_BORDER_WIDTH" default="0.0"/>
            <visualProperty name="NODE_CUSTOMGRAPHICS_POSITION_9" default="C,C,c,0.00,0.00"/>
            <visualProperty name="NODE_CUSTOMPAINT_3" default="DefaultVisualizableVisualProperty(id=NODE_CUSTOMPAINT_3, name=Node Custom Paint 3)"/>
            <visualProperty name="NODE_VISIBLE" default="true"/>
            <visualProperty name="NODE_CUSTOMPAINT_5" default="DefaultVisualizableVisualProperty(id=NODE_CUSTOMPAINT_5, name=Node Custom Paint 5)"/>
            <visualProperty name="NODE_CUSTOMPAINT_9" default="DefaultVisualizableVisualProperty(id=NODE_CUSTOMPAINT_9, name=Node Custom Paint 9)"/>
            <visualProperty name="NODE_DEPTH" default="0.0"/>
            <visualProperty name="COMPOUND_NODE_SHAPE" default="ROUND_RECTANGLE"/>
            <visualProperty name="NODE_LABEL_COLOR" default="#333333"/>
        </node>
        <edge>
            <dependency name="arrowColorMatchesEdge" value="false"/>
            <visualProperty name="EDGE_VISIBLE" default="true"/>
            <visualProperty name="EDGE_LABEL_COLOR" default="#333333"/>
            <visualProperty name="EDGE_STROKE_SELECTED_PAINT" default="#FF0000"/>
            <visualProperty name="EDGE_CURVED" default="true"/>
            <visualProperty name="EDGE_SELECTED" default="false"/>
            <visualProperty name="EDGE_LABEL" default="">
                <passthroughMapping attributeType="string" attributeName="interaction"/>
            </visualProperty>
            <visualProperty name="EDGE_STROKE_UNSELECTED_PAINT" default="#999999"/>
            <visualProperty name="EDGE_LABEL_WIDTH" default="200.0"/>
            <visualProperty name="EDGE_TRANSPARENCY" default="255"/>
            <visualProperty name="EDGE_UNSELECTED_PAINT" default="#404040"/>
            <visualProperty name="EDGE_LABEL_FONT_FACE" default="Dialog.plain,plain,10"/>
            <visualProperty name="EDGE_LINE_TYPE" default="SOLID">
                <discreteMapping attributeType="string" attributeName="interaction">
                    <discreteMappingEntry value="SOLID" attributeValue="pp"/>
                    <discreteMappingEntry value="LONG_DASH" attributeValue="pd"/>
                </discreteMapping>
            </visualProperty>
            <visualProperty name="EDGE_SOURCE_ARROW_SELECTED_PAINT" default="#FFFF00"/>
            <visualProperty name="EDGE_LABEL_FONT_SIZE" default="10"/>
            <visualProperty name="EDGE_SOURCE_ARROW_UNSELECTED_PAINT" default="#000000"/>
            <visualProperty name="EDGE_TARGET_ARROW_SIZE" default="6.0"/>
            <visualProperty name="EDGE_WIDTH" default="1.0"/>
            <visualProperty name="EDGE_PAINT" default="#323232"/>
            <visualProperty name="EDGE_TARGET_ARROW_UNSELECTED_PAINT" default="#000000"/>
            <visualProperty name="EDGE_LABEL_TRANSPARENCY" default="255"/>
            <visualProperty name="EDGE_TOOLTIP" default=""/>
            <visualProperty name="EDGE_TARGET_ARROW_SHAPE" default="NONE"/>
            <visualProperty name="EDGE_SOURCE_ARROW_SIZE" default="6.0"/>
            <visualProperty name="EDGE_SELECTED_PAINT" default="#FF0000"/>
            <visualProperty name="EDGE_BEND" default=""/>
            <visualProperty name="EDGE_TARGET_ARROW_SELECTED_PAINT" default="#FFFF00"/>
            <visualProperty name="EDGE_SOURCE_ARROW_SHAPE" default="NONE"/>
        </edge>
    </visualStyle>
    <visualStyle name="Sample2">
        <network>
            <visualProperty name="NETWORK_TITLE" default=""/>
            <visualProperty name="NETWORK_EDGE_SELECTION" default="true"/>
            <visualProperty name="NETWORK_BACKGROUND_PAINT" default="#EBE8E1"/>
            <visualProperty name="NETWORK_WIDTH" default="550.0"/>
            <visualProperty name="NETWORK_NODE_SELECTION" default="true"/>
            <visualProperty name="NETWORK_CENTER_Z_LOCATION" default="0.0"/>
            <visualProperty name="NETWORK_CENTER_X_LOCATION" default="0.0"/>
            <visualProperty name="NETWORK_SCALE_FACTOR" default="1.0"/>
            <visualProperty name="NETWORK_DEPTH" default="0.0"/>
            <visualProperty name="NETWORK_HEIGHT" default="400.0"/>
            <visualProperty name="NETWORK_CENTER_Y_LOCATION" default="0.0"/>
        </network>
        <node>
            <dependency name="nodeCustomGraphicsSizeSync" value="true"/>
            <dependency name="nodeSizeLocked" value="true"/>
            <visualProperty name="NODE_CUSTOMGRAPHICS_POSITION_5" default="C,C,c,0.00,0.00"/>
            <visualProperty name="NODE_CUSTOMGRAPHICS_POSITION_6" default="C,C,c,0.00,0.00"/>
            <visualProperty name="NODE_BORDER_PAINT" default="#FFFFFF"/>
            <visualProperty name="NODE_CUSTOMGRAPHICS_SIZE_5" default="0.0"/>
            <visualProperty name="NODE_CUSTOMGRAPHICS_SIZE_8" default="0.0"/>
            <visualProperty name="NODE_CUSTOMGRAPHICS_8" default="org.cytoscape.ding.customgraphics.NullCustomGraphics,0,[ Remove Graphics ],"/>
            <visualProperty name="NODE_CUSTOMGRAPHICS_SIZE_7" default="0.0"/>
            <visualProperty name="NODE_CUSTOMGRAPHICS_SIZE_6" default="0.0"/>
            <visualProperty name="NODE_LABEL_WIDTH" default="200.0"/>
            <visualProperty name="NODE_CUSTOMGRAPHICS_POSITION_7" default="C,C,c,0.00,0.00"/>
            <visualProperty name="NODE_CUSTOMGRAPHICS_SIZE_9" default="0.0"/>
            <visualProperty name="NODE_SIZE" default="50.0"/>
            <visualProperty name="NODE_CUSTOMGRAPHICS_SIZE_4" default="0.0"/>
            <visualProperty name="NODE_CUSTOMGRAPHICS_3" default="org.cytoscape.ding.customgraphics.NullCustomGraphics,0,[ Remove Graphics ],"/>
            <visualProperty name="NODE_LABEL_POSITION" default="E,W,c,5.00,0.00"/>
            <visualProperty name="NODE_CUSTOMGRAPHICS_POSITION_4" default="C,C,c,0.00,0.00"/>
            <visualProperty name="NODE_CUSTOMGRAPHICS_7" default="org.cytoscape.ding.customgraphics.NullCustomGraphics,0,[ Remove Graphics ],"/>
            <visualProperty name="NODE_Z_LOCATION" default="0.0"/>
            <visualProperty name="NODE_CUSTOMGRAPHICS_4" default="org.cytoscape.ding.customgraphics.NullCustomGraphics,0,[ Remove Graphics ],"/>
            <visualProperty name="NODE_CUSTOMGRAPHICS_POSITION_3" default="C,C,c,0.00,0.00"/>
            <visualProperty name="NODE_NESTED_NETWORK_IMAGE_VISIBLE" default="true"/>
            <visualProperty name="NODE_TRANSPARENCY" default="255"/>
            <visualProperty name="COMPOUND_NODE_PADDING" default="10.0"/>
            <visualProperty name="NODE_WIDTH" default="60.0"/>
            <visualProperty name="NODE_CUSTOMGRAPHICS_POSITION_8" default="C,C,c,0.00,0.00"/>
            <visualProperty name="NODE_CUSTOMGRAPHICS_1" default="org.cytoscape.ding.customgraphics.NullCustomGraphics,0,[ Remove Graphics ],"/>
            <visualProperty name="NODE_LABEL_FONT_SIZE" default="20"/>
            <visualProperty name="NODE_Y_LOCATION" default="0.0"/>
            <visualProperty name="NODE_LABEL_FONT_FACE" default="Dialog.plain,plain,12"/>
            <visualProperty name="NODE_CUSTOMGRAPHICS_5" default="org.cytoscape.ding.customgraphics.NullCustomGraphics,0,[ Remove Graphics ],"/>
            <visualProperty name="NODE_CUSTOMGRAPHICS_SIZE_2" default="0.0"/>
            <visualProperty name="NODE_BORDER_STROKE" default="SOLID"/>
            <visualProperty name="NODE_LABEL_TRANSPARENCY" default="255"/>
            <visualProperty name="NODE_TOOLTIP" default=""/>
            <visualProperty name="NODE_SELECTED_PAINT" default="#FFFF00"/>
            <visualProperty name="NODE_FILL_COLOR" default="#3A7FB6"/>
            <visualProperty name="NODE_CUSTOMGRAPHICS_POSITION_1" default="C,C,c,0.00,0.00"/>
            <visualProperty name="NODE_CUSTOMGRAPHICS_POSITION_2" default="C,C,c,0.00,0.00"/>
            <visualProperty name="NODE_CUSTOMGRAPHICS_SIZE_3" default="0.0"/>
            <visualProperty name="NODE_BORDER_TRANSPARENCY" default="255"/>
            <visualProperty name="NODE_CUSTOMGRAPHICS_9" default="org.cytoscape.ding.customgraphics.NullCustomGraphics,0,[ Remove Graphics ],"/>
            <visualProperty name="NODE_CUSTOMGRAPHICS_SIZE_1" default="0.0"/>
            <visualProperty name="NODE_SELECTED" default="false"/>
            <visualProperty name="NODE_X_LOCATION" default="0.0"/>
            <visualProperty name="NODE_CUSTOMGRAPHICS_6" default="org.cytoscape.ding.customgraphics.NullCustomGraphics,0,[ Remove Graphics ],"/>
            <visualProperty name="NODE_SHAPE" default="ELLIPSE"/>
            <visualProperty name="NODE_HEIGHT" default="40.0"/>
            <visualProperty name="NODE_LABEL" default="">
                <passthroughMapping attributeType="string" attributeName="name"/>
            </visualProperty>
            <visualProperty name="NODE_CUSTOMGRAPHICS_2" default="org.cytoscape.ding.customgraphics.NullCustomGraphics,0,[ Remove Graphics ],"/>
            <visualProperty name="NODE_BORDER_WIDTH" default="15.0"/>
            <visualProperty name="NODE_CUSTOMGRAPHICS_POSITION_9" default="C,C,c,0.00,0.00"/>
            <visualProperty name="NODE_VISIBLE" default="true"/>
            <visualProperty name="NODE_DEPTH" default="0.0"/>
            <visualProperty name="COMPOUND_NODE_SHAPE" default="ROUND_RECTANGLE"/>
            <visualProperty name="NODE_LABEL_COLOR" default="#666666"/>
        </node>
        <edge>
            <dependency name="arrowColorMatchesEdge" value="false"/>
            <visualProperty name="EDGE_VISIBLE" default="true"/>
            <visualProperty name="EDGE_LABEL_COLOR" default="#000000"/>
            <visualProperty name="EDGE_STROKE_SELECTED_PAINT" default="#FF0000"/>
            <visualProperty name="EDGE_CURVED" default="true"/>
            <visualProperty name="EDGE_SELECTED" default="false"/>
            <visualProperty name="EDGE_LABEL" default=""/>
            <visualProperty name="EDGE_STROKE_UNSELECTED_PAINT" default="#FFFFFF"/>
            <visualProperty name="EDGE_LABEL_WIDTH" default="200.0"/>
            <visualProperty name="EDGE_TRANSPARENCY" default="255"/>
            <visualProperty name="EDGE_LABEL_FONT_FACE" default="SansSerif.plain,plain,10"/>
            <visualProperty name="EDGE_LINE_TYPE" default="SOLID"/>
            <visualProperty name="EDGE_SOURCE_ARROW_SELECTED_PAINT" default="#FFFF00"/>
            <visualProperty name="EDGE_LABEL_FONT_SIZE" default="10"/>
            <visualProperty name="EDGE_SOURCE_ARROW_UNSELECTED_PAINT" default="#000000"/>
            <visualProperty name="EDGE_TARGET_ARROW_SIZE" default="6.0"/>
            <visualProperty name="EDGE_WIDTH" default="20.0"/>
            <visualProperty name="EDGE_TARGET_ARROW_UNSELECTED_PAINT" default="#000000"/>
            <visualProperty name="EDGE_LABEL_TRANSPARENCY" default="255"/>
            <visualProperty name="EDGE_TOOLTIP" default=""/>
            <visualProperty name="EDGE_TARGET_ARROW_SHAPE" default="NONE"/>
            <visualProperty name="EDGE_SOURCE_ARROW_SIZE" default="6.0"/>
            <visualProperty name="EDGE_TARGET_ARROW_SELECTED_PAINT" default="#FFFF00"/>
            <visualProperty name="EDGE_SOURCE_ARROW_SHAPE" default="NONE"/>
        </edge>
    </visualStyle>
    <visualStyle name="BioPAX_SIF">
        <network>
            <visualProperty name="NETWORK_BACKGROUND_PAINT" default="#FFFFFF"/>
        </network>
        <node>
            <dependency name="nodeCustomGraphicsSizeSync" value="true"/>
            <dependency name="nodeSizeLocked" value="false"/>
            <visualProperty name="NODE_TRANSPARENCY" default="125"/>
            <visualProperty name="NODE_FILL_COLOR" default="#FF9999">
                <discreteMapping attributeType="string" attributeName="BIOPAX_TYPE">
                    <discreteMappingEntry value="#99CCFF" attributeValue="Complex"/>
                </discreteMapping>
            </visualProperty>
            <visualProperty name="NODE_SHAPE" default="ELLIPSE">
                <discreteMapping attributeType="string" attributeName="BIOPAX_TYPE">
                    <discreteMappingEntry value="HEXAGON" attributeValue="Complex"/>
                </discreteMapping>
            </visualProperty>
            <visualProperty name="NODE_LABEL">
                <passthroughMapping attributeType="string" attributeName="name"/>
            </visualProperty>
        </node>
        <edge>
            <dependency name="arrowColorMatchesEdge" value="true"/>
            <visualProperty name="EDGE_STROKE_UNSELECTED_PAINT" default="#000000">
                <discreteMapping attributeType="string" attributeName="interaction">
                    <discreteMappingEntry value="#005500" attributeValue="interacts-with"/>
                    <discreteMappingEntry value="#F09000" attributeValue="chemical-affects"/>
                    <discreteMappingEntry value="#0000C0" attributeValue="controls-state-change-of"/>
                    <discreteMappingEntry value="#700000" attributeValue="controls-transport-of"/>
                    <discreteMappingEntry value="#FF3300" attributeValue="consumption-controled-by"/>
                    <discreteMappingEntry value="#00FF00" attributeValue="reacts-with"/>
                    <discreteMappingEntry value="#00AA00" attributeValue="neighbor-of"/>
                    <discreteMappingEntry value="#00A0A0" attributeValue="controls-expression-of"/>
                    <discreteMappingEntry value="#0000FF" attributeValue="controls-phosphorylation-of"/>
                    <discreteMappingEntry value="#A00000" attributeValue="controls-transport-of-chemical"/>
                    <discreteMappingEntry value="#F75500" attributeValue="used-to-produce"/>
                    <discreteMappingEntry value="#F000A0" attributeValue="in-complex-with"/>
                    <discreteMappingEntry value="#00CCF0" attributeValue="controls-production-of"/>
                    <discreteMappingEntry value="#7000A0" attributeValue="catalysis-precedes"/>
                </discreteMapping>
            </visualProperty>
            <visualProperty name="EDGE_UNSELECTED_PAINT" default="#000000">
                <discreteMapping attributeType="string" attributeName="interaction">
                    <discreteMappingEntry value="#005500" attributeValue="interacts-with"/>
                    <discreteMappingEntry value="#F09000" attributeValue="chemical-affects"/>
                    <discreteMappingEntry value="#0000C0" attributeValue="controls-state-change-of"/>
                    <discreteMappingEntry value="#700000" attributeValue="controls-transport-of"/>
                    <discreteMappingEntry value="#FF3300" attributeValue="consumption-controled-by"/>
                    <discreteMappingEntry value="#00FF00" attributeValue="reacts-with"/>
                    <discreteMappingEntry value="#00AA00" attributeValue="neighbor-of"/>
                    <discreteMappingEntry value="#00A0A0" attributeValue="controls-expression-of"/>
                    <discreteMappingEntry value="#0000FF" attributeValue="controls-phosphorylation-of"/>
                    <discreteMappingEntry value="#A00000" attributeValue="controls-transport-of-chemical"/>
                    <discreteMappingEntry value="#F75500" attributeValue="used-to-produce"/>
                    <discreteMappingEntry value="#F000A0" attributeValue="in-complex-with"/>
                    <discreteMappingEntry value="#00CCF0" attributeValue="controls-production-of"/>
                    <discreteMappingEntry value="#7000A0" attributeValue="catalysis-precedes"/>
                </discreteMapping>
            </visualProperty>
            <visualProperty name="EDGE_WIDTH" default="4.0"/>
            <visualProperty name="EDGE_TARGET_ARROW_SHAPE">
                <discreteMapping attributeType="string" attributeName="interaction">
                    <discreteMappingEntry value="ARROW" attributeValue="controls-expression-of"/>
                    <discreteMappingEntry value="ARROW" attributeValue="chemical-affects"/>
                    <discreteMappingEntry value="ARROW" attributeValue="controls-state-change-of"/>
                    <discreteMappingEntry value="ARROW" attributeValue="controls-phosphorylation-of"/>
                    <discreteMappingEntry value="ARROW" attributeValue="controls-transport-of-chemical"/>
                    <discreteMappingEntry value="ARROW" attributeValue="used-to-produce"/>
                    <discreteMappingEntry value="ARROW" attributeValue="controls-transport-of"/>
                    <discreteMappingEntry value="ARROW" attributeValue="consumption-controled-by"/>
                    <discreteMappingEntry value="ARROW" attributeValue="controls-production-of"/>
                    <discreteMappingEntry value="ARROW" attributeValue="catalysis-precedes"/>
                </discreteMapping>
            </visualProperty>
        </edge>
    </visualStyle>
    <visualStyle name="Universe">
        <network>
            <visualProperty name="NETWORK_TITLE" default=""/>
            <visualProperty name="NETWORK_EDGE_SELECTION" default="true"/>
            <visualProperty name="NETWORK_SIZE" default="550.0"/>
            <visualProperty name="NETWORK_BACKGROUND_PAINT" default="#000000"/>
            <visualProperty name="NETWORK_WIDTH" default="550.0"/>
            <visualProperty name="NETWORK_NODE_SELECTION" default="true"/>
            <visualProperty name="NETWORK_CENTER_Z_LOCATION" default="0.0"/>
            <visualProperty name="NETWORK_CENTER_X_LOCATION" default="0.0"/>
            <visualProperty name="NETWORK_SCALE_FACTOR" default="1.0"/>
            <visualProperty name="NETWORK_DEPTH" default="0.0"/>
            <visualProperty name="NETWORK_HEIGHT" default="400.0"/>
            <visualProperty name="NETWORK_CENTER_Y_LOCATION" default="0.0"/>
        </network>
        <node>
            <dependency name="nodeCustomGraphicsSizeSync" value="true"/>
            <dependency name="nodeSizeLocked" value="true"/>
            <visualProperty name="NODE_CUSTOMGRAPHICS_POSITION_5" default="C,C,c,0.00,0.00"/>
            <visualProperty name="NODE_CUSTOMGRAPHICS_POSITION_6" default="C,C,c,0.00,0.00"/>
            <visualProperty name="NODE_CUSTOMPAINT_1" default="DefaultVisualizableVisualProperty(id=NODE_CUSTOMPAINT_1, name=Node Custom Paint 1)"/>
            <visualProperty name="NODE_BORDER_PAINT" default="#000000"/>
            <visualProperty name="NODE_CUSTOMGRAPHICS_SIZE_5" default="50.0"/>
            <visualProperty name="NODE_CUSTOMGRAPHICS_SIZE_8" default="50.0"/>
            <visualProperty name="NODE_CUSTOMGRAPHICS_8" default="org.cytoscape.ding.customgraphics.NullCustomGraphics,0,[ Remove Graphics ],"/>
            <visualProperty name="NODE_CUSTOMGRAPHICS_SIZE_7" default="50.0"/>
            <visualProperty name="NODE_CUSTOMPAINT_6" default="DefaultVisualizableVisualProperty(id=NODE_CUSTOMPAINT_6, name=Node Custom Paint 6)"/>
            <visualProperty name="NODE_CUSTOMGRAPHICS_SIZE_6" default="50.0"/>
            <visualProperty name="NODE_LABEL_WIDTH" default="200.0"/>
            <visualProperty name="NODE_CUSTOMGRAPHICS_POSITION_7" default="C,C,c,0.00,0.00"/>
            <visualProperty name="NODE_CUSTOMGRAPHICS_SIZE_9" default="50.0"/>
            <visualProperty name="NODE_SIZE" default="40.0"/>
            <visualProperty name="NODE_PAINT" default="#787878"/>
            <visualProperty name="NODE_CUSTOMGRAPHICS_SIZE_4" default="50.0"/>
            <visualProperty name="NODE_CUSTOMGRAPHICS_3" default="org.cytoscape.ding.customgraphics.NullCustomGraphics,0,[ Remove Graphics ],"/>
            <visualProperty name="NODE_LABEL_POSITION" default="C,C,c,0.00,0.00"/>
            <visualProperty name="NODE_CUSTOMGRAPHICS_POSITION_4" default="C,C,c,0.00,0.00"/>
            <visualProperty name="NODE_CUSTOMGRAPHICS_7" default="org.cytoscape.ding.customgraphics.NullCustomGraphics,0,[ Remove Graphics ],"/>
            <visualProperty name="NODE_Z_LOCATION" default="0.0"/>
            <visualProperty name="NODE_CUSTOMGRAPHICS_4" default="org.cytoscape.ding.customgraphics.NullCustomGraphics,0,[ Remove Graphics ],"/>
            <visualProperty name="NODE_CUSTOMGRAPHICS_POSITION_3" default="C,C,c,0.00,0.00"/>
            <visualProperty name="NODE_NESTED_NETWORK_IMAGE_VISIBLE" default="true"/>
            <visualProperty name="NODE_TRANSPARENCY" default="255"/>
            <visualProperty name="COMPOUND_NODE_PADDING" default="10.0"/>
            <visualProperty name="NODE_WIDTH" default="20.0"/>
            <visualProperty name="NODE_CUSTOMGRAPHICS_POSITION_8" default="C,C,c,0.00,0.00"/>
            <visualProperty name="NODE_CUSTOMGRAPHICS_1" default="org.cytoscape.ding.customgraphics.NullCustomGraphics,0,[ Remove Graphics ],"/>
            <visualProperty name="NODE_LABEL_FONT_SIZE" default="18"/>
            <visualProperty name="NODE_Y_LOCATION" default="0.0"/>
            <visualProperty name="NODE_LABEL_FONT_FACE" default="Monospaced.plain,plain,12"/>
            <visualProperty name="NODE_CUSTOMPAINT_4" default="DefaultVisualizableVisualProperty(id=NODE_CUSTOMPAINT_4, name=Node Custom Paint 4)"/>
            <visualProperty name="NODE_CUSTOMPAINT_7" default="DefaultVisualizableVisualProperty(id=NODE_CUSTOMPAINT_7, name=Node Custom Paint 7)"/>
            <visualProperty name="NODE_CUSTOMGRAPHICS_5" default="org.cytoscape.ding.customgraphics.NullCustomGraphics,0,[ Remove Graphics ],"/>
            <visualProperty name="NODE_CUSTOMGRAPHICS_SIZE_2" default="50.0"/>
            <visualProperty name="NODE_BORDER_STROKE" default="SOLID"/>
            <visualProperty name="NODE_LABEL_TRANSPARENCY" default="255"/>
            <visualProperty name="NODE_TOOLTIP" default=""/>
            <visualProperty name="NODE_SELECTED_PAINT" default="#FFFF00"/>
            <visualProperty name="NODE_FILL_COLOR" default="#000000"/>
            <visualProperty name="NODE_CUSTOMGRAPHICS_POSITION_1" default="C,C,c,0.00,0.00"/>
            <visualProperty name="NODE_CUSTOMGRAPHICS_POSITION_2" default="C,C,c,0.00,0.00"/>
            <visualProperty name="NODE_CUSTOMGRAPHICS_SIZE_3" default="50.0"/>
            <visualProperty name="NODE_BORDER_TRANSPARENCY" default="255"/>
            <visualProperty name="NODE_CUSTOMPAINT_2" default="DefaultVisualizableVisualProperty(id=NODE_CUSTOMPAINT_2, name=Node Custom Paint 2)"/>
            <visualProperty name="NODE_CUSTOMGRAPHICS_9" default="org.cytoscape.ding.customgraphics.NullCustomGraphics,0,[ Remove Graphics ],"/>
            <visualProperty name="NODE_CUSTOMGRAPHICS_SIZE_1" default="50.0"/>
            <visualProperty name="NODE_SELECTED" default="false"/>
            <visualProperty name="NODE_CUSTOMPAINT_8" default="DefaultVisualizableVisualProperty(id=NODE_CUSTOMPAINT_8, name=Node Custom Paint 8)"/>
            <visualProperty name="NODE_X_LOCATION" default="0.0"/>
            <visualProperty name="NODE_CUSTOMGRAPHICS_6" default="org.cytoscape.ding.customgraphics.NullCustomGraphics,0,[ Remove Graphics ],"/>
            <visualProperty name="NODE_SHAPE" default="ELLIPSE"/>
            <visualProperty name="NODE_HEIGHT" default="20.0"/>
            <visualProperty name="NODE_LABEL" default="">
                <passthroughMapping attributeType="string" attributeName="name"/>
            </visualProperty>
            <visualProperty name="NODE_CUSTOMGRAPHICS_2" default="org.cytoscape.ding.customgraphics.NullCustomGraphics,0,[ Remove Graphics ],"/>
            <visualProperty name="NODE_BORDER_WIDTH" default="0.0"/>
            <visualProperty name="NODE_CUSTOMGRAPHICS_POSITION_9" default="C,C,c,0.00,0.00"/>
            <visualProperty name="NODE_CUSTOMPAINT_3" default="DefaultVisualizableVisualProperty(id=NODE_CUSTOMPAINT_3, name=Node Custom Paint 3)"/>
            <visualProperty name="NODE_VISIBLE" default="true"/>
            <visualProperty name="NODE_CUSTOMPAINT_5" default="DefaultVisualizableVisualProperty(id=NODE_CUSTOMPAINT_5, name=Node Custom Paint 5)"/>
            <visualProperty name="NODE_CUSTOMPAINT_9" default="DefaultVisualizableVisualProperty(id=NODE_CUSTOMPAINT_9, name=Node Custom Paint 9)"/>
            <visualProperty name="NODE_DEPTH" default="0.0"/>
            <visualProperty name="COMPOUND_NODE_SHAPE" default="ROUND_RECTANGLE"/>
            <visualProperty name="NODE_LABEL_COLOR" default="#FFFFFF"/>
        </node>
        <edge>
            <dependency name="arrowColorMatchesEdge" value="false"/>
            <visualProperty name="EDGE_VISIBLE" default="true"/>
            <visualProperty name="EDGE_LABEL_COLOR" default="#000000"/>
            <visualProperty name="EDGE_STROKE_SELECTED_PAINT" default="#FF0000"/>
            <visualProperty name="EDGE_CURVED" default="true"/>
            <visualProperty name="EDGE_SELECTED" default="false"/>
            <visualProperty name="EDGE_LABEL" default=""/>
            <visualProperty name="EDGE_STROKE_UNSELECTED_PAINT" default="#999999"/>
            <visualProperty name="EDGE_LABEL_WIDTH" default="200.0"/>
            <visualProperty name="EDGE_TRANSPARENCY" default="255"/>
            <visualProperty name="EDGE_UNSELECTED_PAINT" default="#404040"/>
            <visualProperty name="EDGE_LABEL_FONT_FACE" default="Dialog.plain,plain,10"/>
            <visualProperty name="EDGE_LINE_TYPE" default="LONG_DASH"/>
            <visualProperty name="EDGE_SOURCE_ARROW_SELECTED_PAINT" default="#FFFF00"/>
            <visualProperty name="EDGE_LABEL_FONT_SIZE" default="10"/>
            <visualProperty name="EDGE_SOURCE_ARROW_UNSELECTED_PAINT" default="#000000"/>
            <visualProperty name="EDGE_TARGET_ARROW_SIZE" default="6.0"/>
            <visualProperty name="EDGE_WIDTH" default="2.0"/>
            <visualProperty name="EDGE_PAINT" default="#323232"/>
            <visualProperty name="EDGE_TARGET_ARROW_UNSELECTED_PAINT" default="#000000"/>
            <visualProperty name="EDGE_LABEL_TRANSPARENCY" default="255"/>
            <visualProperty name="EDGE_TOOLTIP" default=""/>
            <visualProperty name="EDGE_TARGET_ARROW_SHAPE" default="NONE"/>
            <visualProperty name="EDGE_SOURCE_ARROW_SIZE" default="6.0"/>
            <visualProperty name="EDGE_SELECTED_PAINT" default="#FF0000"/>
            <visualProperty name="EDGE_BEND" default=""/>
            <visualProperty name="EDGE_TARGET_ARROW_SELECTED_PAINT" default="#FFFF00"/>
            <visualProperty name="EDGE_SOURCE_ARROW_SHAPE" default="NONE"/>
        </edge>
    </visualStyle>
    <visualStyle name="Directed">
        <network>
            <visualProperty name="NETWORK_TITLE" default=""/>
            <visualProperty name="NETWORK_EDGE_SELECTION" default="true"/>
            <visualProperty name="NETWORK_SIZE" default="550.0"/>
            <visualProperty name="NETWORK_BACKGROUND_PAINT" default="#FFFFFF"/>
            <visualProperty name="NETWORK_WIDTH" default="550.0"/>
            <visualProperty name="NETWORK_NODE_SELECTION" default="true"/>
            <visualProperty name="NETWORK_CENTER_Z_LOCATION" default="0.0"/>
            <visualProperty name="NETWORK_CENTER_X_LOCATION" default="0.0"/>
            <visualProperty name="NETWORK_SCALE_FACTOR" default="1.0"/>
            <visualProperty name="NETWORK_DEPTH" default="0.0"/>
            <visualProperty name="NETWORK_HEIGHT" default="400.0"/>
            <visualProperty name="NETWORK_CENTER_Y_LOCATION" default="0.0"/>
        </network>
        <node>
            <dependency name="nodeCustomGraphicsSizeSync" value="true"/>
            <dependency name="nodeSizeLocked" value="true"/>
            <visualProperty name="NODE_CUSTOMGRAPHICS_POSITION_5" default="C,C,c,0.00,0.00"/>
            <visualProperty name="NODE_CUSTOMGRAPHICS_POSITION_6" default="C,C,c,0.00,0.00"/>
            <visualProperty name="NODE_CUSTOMPAINT_1" default="DefaultVisualizableVisualProperty(id=NODE_CUSTOMPAINT_1, name=Node Custom Paint 1)"/>
            <visualProperty name="NODE_BORDER_PAINT" default="#919191"/>
            <visualProperty name="NODE_CUSTOMGRAPHICS_SIZE_5" default="50.0"/>
            <visualProperty name="NODE_CUSTOMGRAPHICS_SIZE_8" default="50.0"/>
            <visualProperty name="NODE_CUSTOMGRAPHICS_8" default="org.cytoscape.ding.customgraphics.NullCustomGraphics,0,[ Remove Graphics ],"/>
            <visualProperty name="NODE_CUSTOMGRAPHICS_SIZE_7" default="50.0"/>
            <visualProperty name="NODE_CUSTOMPAINT_6" default="DefaultVisualizableVisualProperty(id=NODE_CUSTOMPAINT_6, name=Node Custom Paint 6)"/>
            <visualProperty name="NODE_CUSTOMGRAPHICS_SIZE_6" default="50.0"/>
            <visualProperty name="NODE_LABEL_WIDTH" default="200.0"/>
            <visualProperty name="NODE_CUSTOMGRAPHICS_POSITION_7" default="C,C,c,0.00,0.00"/>
            <visualProperty name="NODE_CUSTOMGRAPHICS_SIZE_9" default="50.0"/>
            <visualProperty name="NODE_SIZE" default="45.0"/>
            <visualProperty name="NODE_PAINT" default="#787878"/>
            <visualProperty name="NODE_CUSTOMGRAPHICS_SIZE_4" default="50.0"/>
            <visualProperty name="NODE_CUSTOMGRAPHICS_3" default="org.cytoscape.ding.customgraphics.NullCustomGraphics,0,[ Remove Graphics ],"/>
            <visualProperty name="NODE_LABEL_POSITION" default="C,C,c,0.00,0.00"/>
            <visualProperty name="NODE_CUSTOMGRAPHICS_POSITION_4" default="C,C,c,0.00,0.00"/>
            <visualProperty name="NODE_CUSTOMGRAPHICS_7" default="org.cytoscape.ding.customgraphics.NullCustomGraphics,0,[ Remove Graphics ],"/>
            <visualProperty name="NODE_Z_LOCATION" default="0.0"/>
            <visualProperty name="NODE_CUSTOMGRAPHICS_4" default="org.cytoscape.ding.customgraphics.NullCustomGraphics,0,[ Remove Graphics ],"/>
            <visualProperty name="NODE_CUSTOMGRAPHICS_POSITION_3" default="C,C,c,0.00,0.00"/>
            <visualProperty name="NODE_NESTED_NETWORK_IMAGE_VISIBLE" default="true"/>
            <visualProperty name="NODE_TRANSPARENCY" default="255"/>
            <visualProperty name="COMPOUND_NODE_PADDING" default="10.0"/>
            <visualProperty name="NODE_WIDTH" default="50.0"/>
            <visualProperty name="NODE_CUSTOMGRAPHICS_POSITION_8" default="C,C,c,0.00,0.00"/>
            <visualProperty name="NODE_CUSTOMGRAPHICS_1" default="org.cytoscape.ding.customgraphics.NullCustomGraphics,0,[ Remove Graphics ],"/>
            <visualProperty name="NODE_LABEL_FONT_SIZE" default="8"/>
            <visualProperty name="NODE_Y_LOCATION" default="0.0"/>
            <visualProperty name="NODE_LABEL_FONT_FACE" default="SansSerif.plain,plain,12"/>
            <visualProperty name="NODE_CUSTOMPAINT_4" default="DefaultVisualizableVisualProperty(id=NODE_CUSTOMPAINT_4, name=Node Custom Paint 4)"/>
            <visualProperty name="NODE_CUSTOMPAINT_7" default="DefaultVisualizableVisualProperty(id=NODE_CUSTOMPAINT_7, name=Node Custom Paint 7)"/>
            <visualProperty name="NODE_CUSTOMGRAPHICS_5" default="org.cytoscape.ding.customgraphics.NullCustomGraphics,0,[ Remove Graphics ],"/>
            <visualProperty name="NODE_CUSTOMGRAPHICS_SIZE_2" default="50.0"/>
            <visualProperty name="NODE_BORDER_STROKE" default="SOLID"/>
            <visualProperty name="NODE_LABEL_TRANSPARENCY" default="255"/>
            <visualProperty name="NODE_TOOLTIP" default=""/>
            <visualProperty name="NODE_SELECTED_PAINT" default="#FF0066"/>
            <visualProperty name="NODE_FILL_COLOR" default="#FFFFFF"/>
            <visualProperty name="NODE_CUSTOMGRAPHICS_POSITION_1" default="C,C,c,0.00,0.00"/>
            <visualProperty name="NODE_CUSTOMGRAPHICS_POSITION_2" default="C,C,c,0.00,0.00"/>
            <visualProperty name="NODE_CUSTOMGRAPHICS_SIZE_3" default="50.0"/>
            <visualProperty name="NODE_BORDER_TRANSPARENCY" default="255"/>
            <visualProperty name="NODE_CUSTOMPAINT_2" default="DefaultVisualizableVisualProperty(id=NODE_CUSTOMPAINT_2, name=Node Custom Paint 2)"/>
            <visualProperty name="NODE_CUSTOMGRAPHICS_9" default="org.cytoscape.ding.customgraphics.NullCustomGraphics,0,[ Remove Graphics ],"/>
            <visualProperty name="NODE_CUSTOMGRAPHICS_SIZE_1" default="50.0"/>
            <visualProperty name="NODE_SELECTED" default="false"/>
            <visualProperty name="NODE_CUSTOMPAINT_8" default="DefaultVisualizableVisualProperty(id=NODE_CUSTOMPAINT_8, name=Node Custom Paint 8)"/>
            <visualProperty name="NODE_X_LOCATION" default="0.0"/>
            <visualProperty name="NODE_CUSTOMGRAPHICS_6" default="org.cytoscape.ding.customgraphics.NullCustomGraphics,0,[ Remove Graphics ],"/>
            <visualProperty name="NODE_SHAPE" default="ELLIPSE"/>
            <visualProperty name="NODE_HEIGHT" default="50.0"/>
            <visualProperty name="NODE_LABEL" default="">
                <passthroughMapping attributeType="string" attributeName="name"/>
            </visualProperty>
            <visualProperty name="NODE_CUSTOMGRAPHICS_2" default="org.cytoscape.ding.customgraphics.NullCustomGraphics,0,[ Remove Graphics ],"/>
            <visualProperty name="NODE_BORDER_WIDTH" default="5.0"/>
            <visualProperty name="NODE_CUSTOMGRAPHICS_POSITION_9" default="C,C,c,0.00,0.00"/>
            <visualProperty name="NODE_CUSTOMPAINT_3" default="DefaultVisualizableVisualProperty(id=NODE_CUSTOMPAINT_3, name=Node Custom Paint 3)"/>
            <visualProperty name="NODE_VISIBLE" default="true"/>
            <visualProperty name="NODE_CUSTOMPAINT_5" default="DefaultVisualizableVisualProperty(id=NODE_CUSTOMPAINT_5, name=Node Custom Paint 5)"/>
            <visualProperty name="NODE_CUSTOMPAINT_9" default="DefaultVisualizableVisualProperty(id=NODE_CUSTOMPAINT_9, name=Node Custom Paint 9)"/>
            <visualProperty name="NODE_DEPTH" default="0.0"/>
            <visualProperty name="COMPOUND_NODE_SHAPE" default="ROUND_RECTANGLE"/>
            <visualProperty name="NODE_LABEL_COLOR" default="#3399FF"/>
        </node>
        <edge>
            <dependency name="arrowColorMatchesEdge" value="true"/>
            <visualProperty name="EDGE_VISIBLE" default="true"/>
            <visualProperty name="EDGE_LABEL_COLOR" default="#3399FF"/>
            <visualProperty name="EDGE_STROKE_SELECTED_PAINT" default="#FF0000"/>
            <visualProperty name="EDGE_CURVED" default="true"/>
            <visualProperty name="EDGE_SELECTED" default="false"/>
            <visualProperty name="EDGE_LABEL" default="">
                <passthroughMapping attributeType="string" attributeName="interaction"/>
            </visualProperty>
            <visualProperty name="EDGE_STROKE_UNSELECTED_PAINT" default="#969696"/>
            <visualProperty name="EDGE_LABEL_WIDTH" default="200.0"/>
            <visualProperty name="EDGE_TRANSPARENCY" default="255"/>
            <visualProperty name="EDGE_UNSELECTED_PAINT" default="#CCCCCC"/>
            <visualProperty name="EDGE_LABEL_FONT_FACE" default="SansSerif.plain,plain,12"/>
            <visualProperty name="EDGE_LINE_TYPE" default="SOLID"/>
            <visualProperty name="EDGE_SOURCE_ARROW_SELECTED_PAINT" default="#FFFF00"/>
            <visualProperty name="EDGE_LABEL_FONT_SIZE" default="12"/>
            <visualProperty name="EDGE_SOURCE_ARROW_UNSELECTED_PAINT" default="#000000"/>
            <visualProperty name="EDGE_TARGET_ARROW_SIZE" default="6.0"/>
            <visualProperty name="EDGE_WIDTH" default="5.0"/>
            <visualProperty name="EDGE_PAINT" default="#808080"/>
            <visualProperty name="EDGE_TARGET_ARROW_UNSELECTED_PAINT" default="#333333"/>
            <visualProperty name="EDGE_LABEL_TRANSPARENCY" default="255"/>
            <visualProperty name="EDGE_TOOLTIP" default=""/>
            <visualProperty name="EDGE_TARGET_ARROW_SHAPE" default="ARROW"/>
            <visualProperty name="EDGE_SOURCE_ARROW_SIZE" default="6.0"/>
            <visualProperty name="EDGE_SELECTED_PAINT" default="#FF0000"/>
            <visualProperty name="EDGE_BEND" default=""/>
            <visualProperty name="EDGE_TARGET_ARROW_SELECTED_PAINT" default="#FFFF00"/>
            <visualProperty name="EDGE_SOURCE_ARROW_SHAPE" default="NONE"/>
        </edge>
    </visualStyle>
    <visualStyle name="size_rank">
        <network>
            <visualProperty name="NETWORK_TITLE" default=""/>
            <visualProperty name="NETWORK_EDGE_SELECTION" default="true"/>
            <visualProperty name="NETWORK_SIZE" default="550.0"/>
            <visualProperty name="NETWORK_BACKGROUND_PAINT" default="#EBEBEB"/>
            <visualProperty name="NETWORK_WIDTH" default="550.0"/>
            <visualProperty name="NETWORK_NODE_SELECTION" default="true"/>
            <visualProperty name="NETWORK_CENTER_Z_LOCATION" default="0.0"/>
            <visualProperty name="NETWORK_CENTER_X_LOCATION" default="0.0"/>
            <visualProperty name="NETWORK_SCALE_FACTOR" default="1.0"/>
            <visualProperty name="NETWORK_DEPTH" default="0.0"/>
            <visualProperty name="NETWORK_HEIGHT" default="400.0"/>
            <visualProperty name="NETWORK_CENTER_Y_LOCATION" default="0.0"/>
        </network>
        <node>
            <dependency name="nodeCustomGraphicsSizeSync" value="true"/>
            <dependency name="nodeSizeLocked" value="true"/>
            <visualProperty name="NODE_CUSTOMGRAPHICS_POSITION_5" default="C,C,c,0.00,0.00"/>
            <visualProperty name="NODE_CUSTOMGRAPHICS_POSITION_6" default="C,C,c,0.00,0.00"/>
            <visualProperty name="NODE_CUSTOMPAINT_1" default="DefaultVisualizableVisualProperty(id=NODE_CUSTOMPAINT_1, name=Node Custom Paint 1)"/>
            <visualProperty name="NODE_BORDER_PAINT" default="#000000"/>
            <visualProperty name="NODE_CUSTOMGRAPHICS_SIZE_5" default="50.0"/>
            <visualProperty name="NODE_CUSTOMGRAPHICS_SIZE_8" default="50.0"/>
            <visualProperty name="NODE_CUSTOMGRAPHICS_8" default="org.cytoscape.ding.customgraphics.NullCustomGraphics,0,[ Remove Graphics ],"/>
            <visualProperty name="NODE_CUSTOMGRAPHICS_SIZE_7" default="50.0"/>
            <visualProperty name="NODE_CUSTOMPAINT_6" default="DefaultVisualizableVisualProperty(id=NODE_CUSTOMPAINT_6, name=Node Custom Paint 6)"/>
            <visualProperty name="NODE_CUSTOMGRAPHICS_SIZE_6" default="50.0"/>
            <visualProperty name="NODE_LABEL_WIDTH" default="200.0"/>
            <visualProperty name="NODE_CUSTOMGRAPHICS_POSITION_7" default="C,C,c,0.00,0.00"/>
            <visualProperty name="NODE_CUSTOMGRAPHICS_SIZE_9" default="50.0"/>
            <visualProperty name="NODE_SIZE" default="12.0">
                <continuousMapping attributeType="float" attributeName="diffusion_output__rank">
                    <continuousMappingPoint lesserValue="1.0" greaterValue="39.11245096536507" equalValue="39.11245096536507" attrValue="0.0"/>
                    <continuousMappingPoint lesserValue="13.821692732043733" greaterValue="1.0" equalValue="13.821692732043733" attrValue="99.0"/>
                </continuousMapping>
            </visualProperty>
            <visualProperty name="NODE_PAINT" default="#787878"/>
            <visualProperty name="NODE_CUSTOMGRAPHICS_SIZE_4" default="50.0"/>
            <visualProperty name="NODE_CUSTOMGRAPHICS_3" default="org.cytoscape.ding.customgraphics.NullCustomGraphics,0,[ Remove Graphics ],"/>
            <visualProperty name="NODE_LABEL_POSITION" default="C,C,c,0.00,0.00"/>
            <visualProperty name="NODE_CUSTOMGRAPHICS_POSITION_4" default="C,C,c,0.00,0.00"/>
            <visualProperty name="NODE_CUSTOMGRAPHICS_7" default="org.cytoscape.ding.customgraphics.NullCustomGraphics,0,[ Remove Graphics ],"/>
            <visualProperty name="NODE_Z_LOCATION" default="0.0"/>
            <visualProperty name="NODE_CUSTOMGRAPHICS_4" default="org.cytoscape.ding.customgraphics.NullCustomGraphics,0,[ Remove Graphics ],"/>
            <visualProperty name="NODE_CUSTOMGRAPHICS_POSITION_3" default="C,C,c,0.00,0.00"/>
            <visualProperty name="NODE_NESTED_NETWORK_IMAGE_VISIBLE" default="true"/>
            <visualProperty name="NODE_TRANSPARENCY" default="255"/>
            <visualProperty name="COMPOUND_NODE_PADDING" default="10.0"/>
            <visualProperty name="NODE_WIDTH" default="50.0"/>
            <visualProperty name="NODE_CUSTOMGRAPHICS_POSITION_8" default="C,C,c,0.00,0.00"/>
            <visualProperty name="NODE_CUSTOMGRAPHICS_1" default="org.cytoscape.ding.customgraphics.NullCustomGraphics,0,[ Remove Graphics ],"/>
            <visualProperty name="NODE_LABEL_FONT_SIZE" default="9"/>
            <visualProperty name="NODE_Y_LOCATION" default="0.0"/>
            <visualProperty name="NODE_LABEL_FONT_FACE" default="SansSerif.plain,plain,12"/>
            <visualProperty name="NODE_CUSTOMPAINT_4" default="DefaultVisualizableVisualProperty(id=NODE_CUSTOMPAINT_4, name=Node Custom Paint 4)"/>
            <visualProperty name="NODE_CUSTOMPAINT_7" default="DefaultVisualizableVisualProperty(id=NODE_CUSTOMPAINT_7, name=Node Custom Paint 7)"/>
            <visualProperty name="NODE_CUSTOMGRAPHICS_5" default="org.cytoscape.ding.customgraphics.NullCustomGraphics,0,[ Remove Graphics ],"/>
            <visualProperty name="NODE_CUSTOMGRAPHICS_SIZE_2" default="50.0"/>
            <visualProperty name="NODE_BORDER_STROKE" default="SOLID"/>
            <visualProperty name="NODE_LABEL_TRANSPARENCY" default="255"/>
            <visualProperty name="NODE_TOOLTIP" default=""/>
            <visualProperty name="NODE_SELECTED_PAINT" default="#FFFF00"/>
            <visualProperty name="NODE_FILL_COLOR" default="#CCCCFF"/>
            <visualProperty name="NODE_CUSTOMGRAPHICS_POSITION_1" default="C,C,c,0.00,0.00"/>
            <visualProperty name="NODE_CUSTOMGRAPHICS_POSITION_2" default="C,C,c,0.00,0.00"/>
            <visualProperty name="NODE_CUSTOMGRAPHICS_SIZE_3" default="50.0"/>
            <visualProperty name="NODE_BORDER_TRANSPARENCY" default="255"/>
            <visualProperty name="NODE_CUSTOMPAINT_2" default="DefaultVisualizableVisualProperty(id=NODE_CUSTOMPAINT_2, name=Node Custom Paint 2)"/>
            <visualProperty name="NODE_CUSTOMGRAPHICS_9" default="org.cytoscape.ding.customgraphics.NullCustomGraphics,0,[ Remove Graphics ],"/>
            <visualProperty name="NODE_CUSTOMGRAPHICS_SIZE_1" default="50.0"/>
            <visualProperty name="NODE_SELECTED" default="false"/>
            <visualProperty name="NODE_CUSTOMPAINT_8" default="DefaultVisualizableVisualProperty(id=NODE_CUSTOMPAINT_8, name=Node Custom Paint 8)"/>
            <visualProperty name="NODE_X_LOCATION" default="0.0"/>
            <visualProperty name="NODE_CUSTOMGRAPHICS_6" default="org.cytoscape.ding.customgraphics.NullCustomGraphics,0,[ Remove Graphics ],"/>
            <visualProperty name="NODE_SHAPE" default="RECTANGLE"/>
            <visualProperty name="NODE_HEIGHT" default="50.0"/>
            <visualProperty name="NODE_LABEL" default="">
                <passthroughMapping attributeType="string" attributeName="name"/>
            </visualProperty>
            <visualProperty name="NODE_CUSTOMGRAPHICS_2" default="org.cytoscape.ding.customgraphics.NullCustomGraphics,0,[ Remove Graphics ],"/>
            <visualProperty name="NODE_BORDER_WIDTH" default="0.0"/>
            <visualProperty name="NODE_CUSTOMGRAPHICS_POSITION_9" default="C,C,c,0.00,0.00"/>
            <visualProperty name="NODE_CUSTOMPAINT_3" default="DefaultVisualizableVisualProperty(id=NODE_CUSTOMPAINT_3, name=Node Custom Paint 3)"/>
            <visualProperty name="NODE_VISIBLE" default="true"/>
            <visualProperty name="NODE_CUSTOMPAINT_5" default="DefaultVisualizableVisualProperty(id=NODE_CUSTOMPAINT_5, name=Node Custom Paint 5)"/>
            <visualProperty name="NODE_CUSTOMPAINT_9" default="DefaultVisualizableVisualProperty(id=NODE_CUSTOMPAINT_9, name=Node Custom Paint 9)"/>
            <visualProperty name="NODE_DEPTH" default="0.0"/>
            <visualProperty name="COMPOUND_NODE_SHAPE" default="ROUND_RECTANGLE"/>
            <visualProperty name="NODE_LABEL_COLOR" default="#333333"/>
        </node>
        <edge>
            <dependency name="arrowColorMatchesEdge" value="false"/>
            <visualProperty name="EDGE_VISIBLE" default="true"/>
            <visualProperty name="EDGE_LABEL_COLOR" default="#000000"/>
            <visualProperty name="EDGE_STROKE_SELECTED_PAINT" default="#FF0000"/>
            <visualProperty name="EDGE_CURVED" default="true"/>
            <visualProperty name="EDGE_SELECTED" default="false"/>
            <visualProperty name="EDGE_LABEL" default=""/>
            <visualProperty name="EDGE_STROKE_UNSELECTED_PAINT" default="#4C4C4C"/>
            <visualProperty name="EDGE_LABEL_WIDTH" default="200.0"/>
            <visualProperty name="EDGE_TRANSPARENCY" default="255"/>
            <visualProperty name="EDGE_UNSELECTED_PAINT" default="#404040"/>
            <visualProperty name="EDGE_LABEL_FONT_FACE" default="SansSerif.plain,plain,10"/>
            <visualProperty name="EDGE_LINE_TYPE" default="SOLID"/>
            <visualProperty name="EDGE_SOURCE_ARROW_SELECTED_PAINT" default="#FFFF00"/>
            <visualProperty name="EDGE_LABEL_FONT_SIZE" default="10"/>
            <visualProperty name="EDGE_SOURCE_ARROW_UNSELECTED_PAINT" default="#000000"/>
            <visualProperty name="EDGE_TARGET_ARROW_SIZE" default="6.0"/>
            <visualProperty name="EDGE_WIDTH" default="2.0"/>
            <visualProperty name="EDGE_PAINT" default="#808080"/>
            <visualProperty name="EDGE_TARGET_ARROW_UNSELECTED_PAINT" default="#000000"/>
            <visualProperty name="EDGE_LABEL_TRANSPARENCY" default="255"/>
            <visualProperty name="EDGE_TOOLTIP" default=""/>
            <visualProperty name="EDGE_TARGET_ARROW_SHAPE" default="NONE"/>
            <visualProperty name="EDGE_SOURCE_ARROW_SIZE" default="6.0"/>
            <visualProperty name="EDGE_SELECTED_PAINT" default="#FF0000"/>
            <visualProperty name="EDGE_BEND" default=""/>
            <visualProperty name="EDGE_TARGET_ARROW_SELECTED_PAINT" default="#FFFF00"/>
            <visualProperty name="EDGE_SOURCE_ARROW_SHAPE" default="NONE"/>
        </edge>
    </visualStyle>
    <visualStyle name="size_rank_6">
        <network>
            <visualProperty name="NETWORK_TITLE" default=""/>
            <visualProperty name="NETWORK_EDGE_SELECTION" default="true"/>
            <visualProperty name="NETWORK_SIZE" default="550.0"/>
            <visualProperty name="NETWORK_BACKGROUND_PAINT" default="#EBEBEB"/>
            <visualProperty name="NETWORK_WIDTH" default="550.0"/>
            <visualProperty name="NETWORK_NODE_SELECTION" default="true"/>
            <visualProperty name="NETWORK_CENTER_Z_LOCATION" default="0.0"/>
            <visualProperty name="NETWORK_CENTER_X_LOCATION" default="0.0"/>
            <visualProperty name="NETWORK_SCALE_FACTOR" default="1.0"/>
            <visualProperty name="NETWORK_DEPTH" default="0.0"/>
            <visualProperty name="NETWORK_HEIGHT" default="400.0"/>
            <visualProperty name="NETWORK_CENTER_Y_LOCATION" default="0.0"/>
        </network>
        <node>
            <dependency name="nodeCustomGraphicsSizeSync" value="true"/>
            <dependency name="nodeSizeLocked" value="true"/>
            <visualProperty name="NODE_CUSTOMGRAPHICS_POSITION_5" default="C,C,c,0.00,0.00"/>
            <visualProperty name="NODE_CUSTOMGRAPHICS_POSITION_6" default="C,C,c,0.00,0.00"/>
            <visualProperty name="NODE_CUSTOMPAINT_1" default="DefaultVisualizableVisualProperty(id=NODE_CUSTOMPAINT_1, name=Node Custom Paint 1)"/>
            <visualProperty name="NODE_BORDER_PAINT" default="#000000"/>
            <visualProperty name="NODE_CUSTOMGRAPHICS_SIZE_5" default="50.0"/>
            <visualProperty name="NODE_CUSTOMGRAPHICS_SIZE_8" default="50.0"/>
            <visualProperty name="NODE_CUSTOMGRAPHICS_8" default="org.cytoscape.ding.customgraphics.NullCustomGraphics,0,[ Remove Graphics ],"/>
            <visualProperty name="NODE_CUSTOMGRAPHICS_SIZE_7" default="50.0"/>
            <visualProperty name="NODE_CUSTOMPAINT_6" default="DefaultVisualizableVisualProperty(id=NODE_CUSTOMPAINT_6, name=Node Custom Paint 6)"/>
            <visualProperty name="NODE_CUSTOMGRAPHICS_SIZE_6" default="50.0"/>
            <visualProperty name="NODE_LABEL_WIDTH" default="200.0"/>
            <visualProperty name="NODE_CUSTOMGRAPHICS_POSITION_7" default="C,C,c,0.00,0.00"/>
            <visualProperty name="NODE_CUSTOMGRAPHICS_SIZE_9" default="50.0"/>
            <visualProperty name="NODE_SIZE" default="12.0">
                <continuousMapping attributeType="float" attributeName="diffusion_output__rank">
                    <continuousMappingPoint lesserValue="1.0" greaterValue="39.11245096536507" equalValue="39.11245096536507" attrValue="0.0"/>
                    <continuousMappingPoint lesserValue="13.821692732043733" greaterValue="1.0" equalValue="13.821692732043733" attrValue="99.0"/>
                </continuousMapping>
            </visualProperty>
            <visualProperty name="NODE_PAINT" default="#787878"/>
            <visualProperty name="NODE_CUSTOMGRAPHICS_SIZE_4" default="50.0"/>
            <visualProperty name="NODE_CUSTOMGRAPHICS_3" default="org.cytoscape.ding.customgraphics.NullCustomGraphics,0,[ Remove Graphics ],"/>
            <visualProperty name="NODE_LABEL_POSITION" default="C,C,c,0.00,0.00"/>
            <visualProperty name="NODE_CUSTOMGRAPHICS_POSITION_4" default="C,C,c,0.00,0.00"/>
            <visualProperty name="NODE_CUSTOMGRAPHICS_7" default="org.cytoscape.ding.customgraphics.NullCustomGraphics,0,[ Remove Graphics ],"/>
            <visualProperty name="NODE_Z_LOCATION" default="0.0"/>
            <visualProperty name="NODE_CUSTOMGRAPHICS_4" default="org.cytoscape.ding.customgraphics.NullCustomGraphics,0,[ Remove Graphics ],"/>
            <visualProperty name="NODE_CUSTOMGRAPHICS_POSITION_3" default="C,C,c,0.00,0.00"/>
            <visualProperty name="NODE_NESTED_NETWORK_IMAGE_VISIBLE" default="true"/>
            <visualProperty name="NODE_TRANSPARENCY" default="255"/>
            <visualProperty name="COMPOUND_NODE_PADDING" default="10.0"/>
            <visualProperty name="NODE_WIDTH" default="50.0"/>
            <visualProperty name="NODE_CUSTOMGRAPHICS_POSITION_8" default="C,C,c,0.00,0.00"/>
            <visualProperty name="NODE_CUSTOMGRAPHICS_1" default="org.cytoscape.ding.customgraphics.NullCustomGraphics,0,[ Remove Graphics ],"/>
            <visualProperty name="NODE_LABEL_FONT_SIZE" default="9"/>
            <visualProperty name="NODE_Y_LOCATION" default="0.0"/>
            <visualProperty name="NODE_LABEL_FONT_FACE" default="SansSerif.plain,plain,12"/>
            <visualProperty name="NODE_CUSTOMPAINT_4" default="DefaultVisualizableVisualProperty(id=NODE_CUSTOMPAINT_4, name=Node Custom Paint 4)"/>
            <visualProperty name="NODE_CUSTOMPAINT_7" default="DefaultVisualizableVisualProperty(id=NODE_CUSTOMPAINT_7, name=Node Custom Paint 7)"/>
            <visualProperty name="NODE_CUSTOMGRAPHICS_5" default="org.cytoscape.ding.customgraphics.NullCustomGraphics,0,[ Remove Graphics ],"/>
            <visualProperty name="NODE_CUSTOMGRAPHICS_SIZE_2" default="50.0"/>
            <visualProperty name="NODE_BORDER_STROKE" default="SOLID"/>
            <visualProperty name="NODE_LABEL_TRANSPARENCY" default="255"/>
            <visualProperty name="NODE_TOOLTIP" default=""/>
            <visualProperty name="NODE_SELECTED_PAINT" default="#FFFF00"/>
            <visualProperty name="NODE_FILL_COLOR" default="#CCCCFF"/>
            <visualProperty name="NODE_CUSTOMGRAPHICS_POSITION_1" default="C,C,c,0.00,0.00"/>
            <visualProperty name="NODE_CUSTOMGRAPHICS_POSITION_2" default="C,C,c,0.00,0.00"/>
            <visualProperty name="NODE_CUSTOMGRAPHICS_SIZE_3" default="50.0"/>
            <visualProperty name="NODE_BORDER_TRANSPARENCY" default="255"/>
            <visualProperty name="NODE_CUSTOMPAINT_2" default="DefaultVisualizableVisualProperty(id=NODE_CUSTOMPAINT_2, name=Node Custom Paint 2)"/>
            <visualProperty name="NODE_CUSTOMGRAPHICS_9" default="org.cytoscape.ding.customgraphics.NullCustomGraphics,0,[ Remove Graphics ],"/>
            <visualProperty name="NODE_CUSTOMGRAPHICS_SIZE_1" default="50.0"/>
            <visualProperty name="NODE_SELECTED" default="false"/>
            <visualProperty name="NODE_CUSTOMPAINT_8" default="DefaultVisualizableVisualProperty(id=NODE_CUSTOMPAINT_8, name=Node Custom Paint 8)"/>
            <visualProperty name="NODE_X_LOCATION" default="0.0"/>
            <visualProperty name="NODE_CUSTOMGRAPHICS_6" default="org.cytoscape.ding.customgraphics.NullCustomGraphics,0,[ Remove Graphics ],"/>
            <visualProperty name="NODE_SHAPE" default="RECTANGLE"/>
            <visualProperty name="NODE_HEIGHT" default="50.0"/>
            <visualProperty name="NODE_LABEL" default="">
                <passthroughMapping attributeType="string" attributeName="name"/>
            </visualProperty>
            <visualProperty name="NODE_CUSTOMGRAPHICS_2" default="org.cytoscape.ding.customgraphics.NullCustomGraphics,0,[ Remove Graphics ],"/>
            <visualProperty name="NODE_BORDER_WIDTH" default="0.0"/>
            <visualProperty name="NODE_CUSTOMGRAPHICS_POSITION_9" default="C,C,c,0.00,0.00"/>
            <visualProperty name="NODE_CUSTOMPAINT_3" default="DefaultVisualizableVisualProperty(id=NODE_CUSTOMPAINT_3, name=Node Custom Paint 3)"/>
            <visualProperty name="NODE_VISIBLE" default="true"/>
            <visualProperty name="NODE_CUSTOMPAINT_5" default="DefaultVisualizableVisualProperty(id=NODE_CUSTOMPAINT_5, name=Node Custom Paint 5)"/>
            <visualProperty name="NODE_CUSTOMPAINT_9" default="DefaultVisualizableVisualProperty(id=NODE_CUSTOMPAINT_9, name=Node Custom Paint 9)"/>
            <visualProperty name="NODE_DEPTH" default="0.0"/>
            <visualProperty name="COMPOUND_NODE_SHAPE" default="ROUND_RECTANGLE"/>
            <visualProperty name="NODE_LABEL_COLOR" default="#333333"/>
        </node>
        <edge>
            <dependency name="arrowColorMatchesEdge" value="false"/>
            <visualProperty name="EDGE_VISIBLE" default="true"/>
            <visualProperty name="EDGE_LABEL_COLOR" default="#000000"/>
            <visualProperty name="EDGE_STROKE_SELECTED_PAINT" default="#FF0000"/>
            <visualProperty name="EDGE_CURVED" default="true"/>
            <visualProperty name="EDGE_SELECTED" default="false"/>
            <visualProperty name="EDGE_LABEL" default=""/>
            <visualProperty name="EDGE_STROKE_UNSELECTED_PAINT" default="#4C4C4C"/>
            <visualProperty name="EDGE_LABEL_WIDTH" default="200.0"/>
            <visualProperty name="EDGE_TRANSPARENCY" default="255"/>
            <visualProperty name="EDGE_UNSELECTED_PAINT" default="#404040"/>
            <visualProperty name="EDGE_LABEL_FONT_FACE" default="SansSerif.plain,plain,10"/>
            <visualProperty name="EDGE_LINE_TYPE" default="SOLID"/>
            <visualProperty name="EDGE_SOURCE_ARROW_SELECTED_PAINT" default="#FFFF00"/>
            <visualProperty name="EDGE_LABEL_FONT_SIZE" default="10"/>
            <visualProperty name="EDGE_SOURCE_ARROW_UNSELECTED_PAINT" default="#000000"/>
            <visualProperty name="EDGE_WIDTH" default="2.0"/>
            <visualProperty name="EDGE_PAINT" default="#808080"/>
            <visualProperty name="EDGE_TARGET_ARROW_UNSELECTED_PAINT" default="#000000"/>
            <visualProperty name="EDGE_LABEL_TRANSPARENCY" default="255"/>
            <visualProperty name="EDGE_TOOLTIP" default=""/>
            <visualProperty name="EDGE_TARGET_ARROW_SHAPE" default="NONE"/>
            <visualProperty name="EDGE_SELECTED_PAINT" default="#FF0000"/>
            <visualProperty name="EDGE_BEND" default=""/>
            <visualProperty name="EDGE_TARGET_ARROW_SELECTED_PAINT" default="#FFFF00"/>
            <visualProperty name="EDGE_SOURCE_ARROW_SHAPE" default="NONE"/>
        </edge>
    </visualStyle>
    <visualStyle name="Minimal">
        <network>
            <visualProperty name="NETWORK_TITLE" default=""/>
            <visualProperty name="NETWORK_EDGE_SELECTION" default="true"/>
            <visualProperty name="NETWORK_SIZE" default="550.0"/>
            <visualProperty name="NETWORK_BACKGROUND_PAINT" default="#EBEBEB"/>
            <visualProperty name="NETWORK_WIDTH" default="550.0"/>
            <visualProperty name="NETWORK_NODE_SELECTION" default="true"/>
            <visualProperty name="NETWORK_CENTER_Z_LOCATION" default="0.0"/>
            <visualProperty name="NETWORK_CENTER_X_LOCATION" default="0.0"/>
            <visualProperty name="NETWORK_SCALE_FACTOR" default="1.0"/>
            <visualProperty name="NETWORK_DEPTH" default="0.0"/>
            <visualProperty name="NETWORK_HEIGHT" default="400.0"/>
            <visualProperty name="NETWORK_CENTER_Y_LOCATION" default="0.0"/>
        </network>
        <node>
            <dependency name="nodeCustomGraphicsSizeSync" value="true"/>
            <dependency name="nodeSizeLocked" value="true"/>
            <visualProperty name="NODE_CUSTOMGRAPHICS_POSITION_5" default="C,C,c,0.00,0.00"/>
            <visualProperty name="NODE_CUSTOMGRAPHICS_POSITION_6" default="C,C,c,0.00,0.00"/>
            <visualProperty name="NODE_CUSTOMPAINT_1" default="DefaultVisualizableVisualProperty(id=NODE_CUSTOMPAINT_1, name=Node Custom Paint 1)"/>
            <visualProperty name="NODE_BORDER_PAINT" default="#000000"/>
            <visualProperty name="NODE_CUSTOMGRAPHICS_SIZE_5" default="50.0"/>
            <visualProperty name="NODE_CUSTOMGRAPHICS_SIZE_8" default="50.0"/>
            <visualProperty name="NODE_CUSTOMGRAPHICS_8" default="org.cytoscape.ding.customgraphics.NullCustomGraphics,0,[ Remove Graphics ],"/>
            <visualProperty name="NODE_CUSTOMGRAPHICS_SIZE_7" default="50.0"/>
            <visualProperty name="NODE_CUSTOMPAINT_6" default="DefaultVisualizableVisualProperty(id=NODE_CUSTOMPAINT_6, name=Node Custom Paint 6)"/>
            <visualProperty name="NODE_CUSTOMGRAPHICS_SIZE_6" default="50.0"/>
            <visualProperty name="NODE_LABEL_WIDTH" default="200.0"/>
            <visualProperty name="NODE_CUSTOMGRAPHICS_POSITION_7" default="C,C,c,0.00,0.00"/>
            <visualProperty name="NODE_CUSTOMGRAPHICS_SIZE_9" default="50.0"/>
            <visualProperty name="NODE_SIZE" default="42.0"/>
            <visualProperty name="NODE_PAINT" default="#787878"/>
            <visualProperty name="NODE_CUSTOMGRAPHICS_SIZE_4" default="50.0"/>
            <visualProperty name="NODE_CUSTOMGRAPHICS_3" default="org.cytoscape.ding.customgraphics.NullCustomGraphics,0,[ Remove Graphics ],"/>
            <visualProperty name="NODE_LABEL_POSITION" default="C,C,c,0.00,0.00"/>
            <visualProperty name="NODE_CUSTOMGRAPHICS_POSITION_4" default="C,C,c,0.00,0.00"/>
            <visualProperty name="NODE_CUSTOMGRAPHICS_7" default="org.cytoscape.ding.customgraphics.NullCustomGraphics,0,[ Remove Graphics ],"/>
            <visualProperty name="NODE_Z_LOCATION" default="0.0"/>
            <visualProperty name="NODE_CUSTOMGRAPHICS_4" default="org.cytoscape.ding.customgraphics.NullCustomGraphics,0,[ Remove Graphics ],"/>
            <visualProperty name="NODE_CUSTOMGRAPHICS_POSITION_3" default="C,C,c,0.00,0.00"/>
            <visualProperty name="NODE_NESTED_NETWORK_IMAGE_VISIBLE" default="true"/>
            <visualProperty name="NODE_TRANSPARENCY" default="255"/>
            <visualProperty name="COMPOUND_NODE_PADDING" default="10.0"/>
            <visualProperty name="NODE_WIDTH" default="50.0"/>
            <visualProperty name="NODE_CUSTOMGRAPHICS_POSITION_8" default="C,C,c,0.00,0.00"/>
            <visualProperty name="NODE_CUSTOMGRAPHICS_1" default="org.cytoscape.ding.customgraphics.NullCustomGraphics,0,[ Remove Graphics ],"/>
            <visualProperty name="NODE_LABEL_FONT_SIZE" default="9"/>
            <visualProperty name="NODE_Y_LOCATION" default="0.0"/>
            <visualProperty name="NODE_LABEL_FONT_FACE" default="SansSerif.plain,plain,12"/>
            <visualProperty name="NODE_CUSTOMPAINT_4" default="DefaultVisualizableVisualProperty(id=NODE_CUSTOMPAINT_4, name=Node Custom Paint 4)"/>
            <visualProperty name="NODE_CUSTOMPAINT_7" default="DefaultVisualizableVisualProperty(id=NODE_CUSTOMPAINT_7, name=Node Custom Paint 7)"/>
            <visualProperty name="NODE_CUSTOMGRAPHICS_5" default="org.cytoscape.ding.customgraphics.NullCustomGraphics,0,[ Remove Graphics ],"/>
            <visualProperty name="NODE_CUSTOMGRAPHICS_SIZE_2" default="50.0"/>
            <visualProperty name="NODE_BORDER_STROKE" default="SOLID"/>
            <visualProperty name="NODE_LABEL_TRANSPARENCY" default="255"/>
            <visualProperty name="NODE_TOOLTIP" default=""/>
            <visualProperty name="NODE_SELECTED_PAINT" default="#FFFF00"/>
            <visualProperty name="NODE_FILL_COLOR" default="#FFFFFF"/>
            <visualProperty name="NODE_CUSTOMGRAPHICS_POSITION_1" default="C,C,c,0.00,0.00"/>
            <visualProperty name="NODE_CUSTOMGRAPHICS_POSITION_2" default="C,C,c,0.00,0.00"/>
            <visualProperty name="NODE_CUSTOMGRAPHICS_SIZE_3" default="50.0"/>
            <visualProperty name="NODE_BORDER_TRANSPARENCY" default="255"/>
            <visualProperty name="NODE_CUSTOMPAINT_2" default="DefaultVisualizableVisualProperty(id=NODE_CUSTOMPAINT_2, name=Node Custom Paint 2)"/>
            <visualProperty name="NODE_CUSTOMGRAPHICS_9" default="org.cytoscape.ding.customgraphics.NullCustomGraphics,0,[ Remove Graphics ],"/>
            <visualProperty name="NODE_CUSTOMGRAPHICS_SIZE_1" default="50.0"/>
            <visualProperty name="NODE_SELECTED" default="false"/>
            <visualProperty name="NODE_CUSTOMPAINT_8" default="DefaultVisualizableVisualProperty(id=NODE_CUSTOMPAINT_8, name=Node Custom Paint 8)"/>
            <visualProperty name="NODE_X_LOCATION" default="0.0"/>
            <visualProperty name="NODE_CUSTOMGRAPHICS_6" default="org.cytoscape.ding.customgraphics.NullCustomGraphics,0,[ Remove Graphics ],"/>
            <visualProperty name="NODE_SHAPE" default="RECTANGLE"/>
            <visualProperty name="NODE_HEIGHT" default="50.0"/>
            <visualProperty name="NODE_LABEL" default="">
                <passthroughMapping attributeType="string" attributeName="name"/>
            </visualProperty>
            <visualProperty name="NODE_CUSTOMGRAPHICS_2" default="org.cytoscape.ding.customgraphics.NullCustomGraphics,0,[ Remove Graphics ],"/>
            <visualProperty name="NODE_BORDER_WIDTH" default="0.0"/>
            <visualProperty name="NODE_CUSTOMGRAPHICS_POSITION_9" default="C,C,c,0.00,0.00"/>
            <visualProperty name="NODE_CUSTOMPAINT_3" default="DefaultVisualizableVisualProperty(id=NODE_CUSTOMPAINT_3, name=Node Custom Paint 3)"/>
            <visualProperty name="NODE_VISIBLE" default="true"/>
            <visualProperty name="NODE_CUSTOMPAINT_5" default="DefaultVisualizableVisualProperty(id=NODE_CUSTOMPAINT_5, name=Node Custom Paint 5)"/>
            <visualProperty name="NODE_CUSTOMPAINT_9" default="DefaultVisualizableVisualProperty(id=NODE_CUSTOMPAINT_9, name=Node Custom Paint 9)"/>
            <visualProperty name="NODE_DEPTH" default="0.0"/>
            <visualProperty name="COMPOUND_NODE_SHAPE" default="ROUND_RECTANGLE"/>
            <visualProperty name="NODE_LABEL_COLOR" default="#333333"/>
        </node>
        <edge>
            <dependency name="arrowColorMatchesEdge" value="false"/>
            <visualProperty name="EDGE_VISIBLE" default="true"/>
            <visualProperty name="EDGE_LABEL_COLOR" default="#000000"/>
            <visualProperty name="EDGE_STROKE_SELECTED_PAINT" default="#FF0000"/>
            <visualProperty name="EDGE_CURVED" default="true"/>
            <visualProperty name="EDGE_SELECTED" default="false"/>
            <visualProperty name="EDGE_LABEL" default=""/>
            <visualProperty name="EDGE_STROKE_UNSELECTED_PAINT" default="#4C4C4C"/>
            <visualProperty name="EDGE_LABEL_WIDTH" default="200.0"/>
            <visualProperty name="EDGE_TRANSPARENCY" default="255"/>
            <visualProperty name="EDGE_UNSELECTED_PAINT" default="#404040"/>
            <visualProperty name="EDGE_LABEL_FONT_FACE" default="SansSerif.plain,plain,10"/>
            <visualProperty name="EDGE_LINE_TYPE" default="SOLID"/>
            <visualProperty name="EDGE_SOURCE_ARROW_SELECTED_PAINT" default="#FFFF00"/>
            <visualProperty name="EDGE_LABEL_FONT_SIZE" default="10"/>
            <visualProperty name="EDGE_SOURCE_ARROW_UNSELECTED_PAINT" default="#000000"/>
            <visualProperty name="EDGE_TARGET_ARROW_SIZE" default="6.0"/>
            <visualProperty name="EDGE_WIDTH" default="2.0"/>
            <visualProperty name="EDGE_PAINT" default="#808080"/>
            <visualProperty name="EDGE_TARGET_ARROW_UNSELECTED_PAINT" default="#000000"/>
            <visualProperty name="EDGE_LABEL_TRANSPARENCY" default="255"/>
            <visualProperty name="EDGE_TOOLTIP" default=""/>
            <visualProperty name="EDGE_TARGET_ARROW_SHAPE" default="NONE"/>
            <visualProperty name="EDGE_SOURCE_ARROW_SIZE" default="6.0"/>
            <visualProperty name="EDGE_SELECTED_PAINT" default="#FF0000"/>
            <visualProperty name="EDGE_BEND" default=""/>
            <visualProperty name="EDGE_TARGET_ARROW_SELECTED_PAINT" default="#FFFF00"/>
            <visualProperty name="EDGE_SOURCE_ARROW_SHAPE" default="NONE"/>
        </edge>
    </visualStyle>
    <visualStyle name="size_rank_3">
        <network>
            <visualProperty name="NETWORK_TITLE" default=""/>
            <visualProperty name="NETWORK_EDGE_SELECTION" default="true"/>
            <visualProperty name="NETWORK_SIZE" default="550.0"/>
            <visualProperty name="NETWORK_BACKGROUND_PAINT" default="#EBEBEB"/>
            <visualProperty name="NETWORK_WIDTH" default="550.0"/>
            <visualProperty name="NETWORK_NODE_SELECTION" default="true"/>
            <visualProperty name="NETWORK_CENTER_Z_LOCATION" default="0.0"/>
            <visualProperty name="NETWORK_CENTER_X_LOCATION" default="0.0"/>
            <visualProperty name="NETWORK_SCALE_FACTOR" default="1.0"/>
            <visualProperty name="NETWORK_DEPTH" default="0.0"/>
            <visualProperty name="NETWORK_HEIGHT" default="400.0"/>
            <visualProperty name="NETWORK_CENTER_Y_LOCATION" default="0.0"/>
        </network>
        <node>
            <dependency name="nodeCustomGraphicsSizeSync" value="true"/>
            <dependency name="nodeSizeLocked" value="true"/>
            <visualProperty name="NODE_CUSTOMGRAPHICS_POSITION_5" default="C,C,c,0.00,0.00"/>
            <visualProperty name="NODE_CUSTOMGRAPHICS_POSITION_6" default="C,C,c,0.00,0.00"/>
            <visualProperty name="NODE_CUSTOMPAINT_1" default="DefaultVisualizableVisualProperty(id=NODE_CUSTOMPAINT_1, name=Node Custom Paint 1)"/>
            <visualProperty name="NODE_BORDER_PAINT" default="#000000"/>
            <visualProperty name="NODE_CUSTOMGRAPHICS_SIZE_5" default="50.0"/>
            <visualProperty name="NODE_CUSTOMGRAPHICS_SIZE_8" default="50.0"/>
            <visualProperty name="NODE_CUSTOMGRAPHICS_8" default="org.cytoscape.ding.customgraphics.NullCustomGraphics,0,[ Remove Graphics ],"/>
            <visualProperty name="NODE_CUSTOMGRAPHICS_SIZE_7" default="50.0"/>
            <visualProperty name="NODE_CUSTOMPAINT_6" default="DefaultVisualizableVisualProperty(id=NODE_CUSTOMPAINT_6, name=Node Custom Paint 6)"/>
            <visualProperty name="NODE_CUSTOMGRAPHICS_SIZE_6" default="50.0"/>
            <visualProperty name="NODE_LABEL_WIDTH" default="200.0"/>
            <visualProperty name="NODE_CUSTOMGRAPHICS_POSITION_7" default="C,C,c,0.00,0.00"/>
            <visualProperty name="NODE_CUSTOMGRAPHICS_SIZE_9" default="50.0"/>
            <visualProperty name="NODE_SIZE" default="12.0">
                <continuousMapping attributeType="float" attributeName="diffusion_output__rank">
                    <continuousMappingPoint lesserValue="1.0" greaterValue="39.11245096536507" equalValue="39.11245096536507" attrValue="0.0"/>
                    <continuousMappingPoint lesserValue="13.821692732043733" greaterValue="1.0" equalValue="13.821692732043733" attrValue="99.0"/>
                </continuousMapping>
            </visualProperty>
            <visualProperty name="NODE_PAINT" default="#787878"/>
            <visualProperty name="NODE_CUSTOMGRAPHICS_SIZE_4" default="50.0"/>
            <visualProperty name="NODE_CUSTOMGRAPHICS_3" default="org.cytoscape.ding.customgraphics.NullCustomGraphics,0,[ Remove Graphics ],"/>
            <visualProperty name="NODE_LABEL_POSITION" default="C,C,c,0.00,0.00"/>
            <visualProperty name="NODE_CUSTOMGRAPHICS_POSITION_4" default="C,C,c,0.00,0.00"/>
            <visualProperty name="NODE_CUSTOMGRAPHICS_7" default="org.cytoscape.ding.customgraphics.NullCustomGraphics,0,[ Remove Graphics ],"/>
            <visualProperty name="NODE_Z_LOCATION" default="0.0"/>
            <visualProperty name="NODE_CUSTOMGRAPHICS_4" default="org.cytoscape.ding.customgraphics.NullCustomGraphics,0,[ Remove Graphics ],"/>
            <visualProperty name="NODE_CUSTOMGRAPHICS_POSITION_3" default="C,C,c,0.00,0.00"/>
            <visualProperty name="NODE_NESTED_NETWORK_IMAGE_VISIBLE" default="true"/>
            <visualProperty name="NODE_TRANSPARENCY" default="255"/>
            <visualProperty name="COMPOUND_NODE_PADDING" default="10.0"/>
            <visualProperty name="NODE_WIDTH" default="50.0"/>
            <visualProperty name="NODE_CUSTOMGRAPHICS_POSITION_8" default="C,C,c,0.00,0.00"/>
            <visualProperty name="NODE_CUSTOMGRAPHICS_1" default="org.cytoscape.ding.customgraphics.NullCustomGraphics,0,[ Remove Graphics ],"/>
            <visualProperty name="NODE_LABEL_FONT_SIZE" default="9"/>
            <visualProperty name="NODE_Y_LOCATION" default="0.0"/>
            <visualProperty name="NODE_LABEL_FONT_FACE" default="SansSerif.plain,plain,12"/>
            <visualProperty name="NODE_CUSTOMPAINT_4" default="DefaultVisualizableVisualProperty(id=NODE_CUSTOMPAINT_4, name=Node Custom Paint 4)"/>
            <visualProperty name="NODE_CUSTOMPAINT_7" default="DefaultVisualizableVisualProperty(id=NODE_CUSTOMPAINT_7, name=Node Custom Paint 7)"/>
            <visualProperty name="NODE_CUSTOMGRAPHICS_5" default="org.cytoscape.ding.customgraphics.NullCustomGraphics,0,[ Remove Graphics ],"/>
            <visualProperty name="NODE_CUSTOMGRAPHICS_SIZE_2" default="50.0"/>
            <visualProperty name="NODE_BORDER_STROKE" default="SOLID"/>
            <visualProperty name="NODE_LABEL_TRANSPARENCY" default="255"/>
            <visualProperty name="NODE_TOOLTIP" default=""/>
            <visualProperty name="NODE_SELECTED_PAINT" default="#FFFF00"/>
            <visualProperty name="NODE_FILL_COLOR" default="#CCCCFF"/>
            <visualProperty name="NODE_CUSTOMGRAPHICS_POSITION_1" default="C,C,c,0.00,0.00"/>
            <visualProperty name="NODE_CUSTOMGRAPHICS_POSITION_2" default="C,C,c,0.00,0.00"/>
            <visualProperty name="NODE_CUSTOMGRAPHICS_SIZE_3" default="50.0"/>
            <visualProperty name="NODE_BORDER_TRANSPARENCY" default="255"/>
            <visualProperty name="NODE_CUSTOMPAINT_2" default="DefaultVisualizableVisualProperty(id=NODE_CUSTOMPAINT_2, name=Node Custom Paint 2)"/>
            <visualProperty name="NODE_CUSTOMGRAPHICS_9" default="org.cytoscape.ding.customgraphics.NullCustomGraphics,0,[ Remove Graphics ],"/>
            <visualProperty name="NODE_CUSTOMGRAPHICS_SIZE_1" default="50.0"/>
            <visualProperty name="NODE_SELECTED" default="false"/>
            <visualProperty name="NODE_CUSTOMPAINT_8" default="DefaultVisualizableVisualProperty(id=NODE_CUSTOMPAINT_8, name=Node Custom Paint 8)"/>
            <visualProperty name="NODE_X_LOCATION" default="0.0"/>
            <visualProperty name="NODE_CUSTOMGRAPHICS_6" default="org.cytoscape.ding.customgraphics.NullCustomGraphics,0,[ Remove Graphics ],"/>
            <visualProperty name="NODE_SHAPE" default="RECTANGLE"/>
            <visualProperty name="NODE_HEIGHT" default="50.0"/>
            <visualProperty name="NODE_LABEL" default="">
                <passthroughMapping attributeType="string" attributeName="name"/>
            </visualProperty>
            <visualProperty name="NODE_CUSTOMGRAPHICS_2" default="org.cytoscape.ding.customgraphics.NullCustomGraphics,0,[ Remove Graphics ],"/>
            <visualProperty name="NODE_BORDER_WIDTH" default="0.0"/>
            <visualProperty name="NODE_CUSTOMGRAPHICS_POSITION_9" default="C,C,c,0.00,0.00"/>
            <visualProperty name="NODE_CUSTOMPAINT_3" default="DefaultVisualizableVisualProperty(id=NODE_CUSTOMPAINT_3, name=Node Custom Paint 3)"/>
            <visualProperty name="NODE_VISIBLE" default="true"/>
            <visualProperty name="NODE_CUSTOMPAINT_5" default="DefaultVisualizableVisualProperty(id=NODE_CUSTOMPAINT_5, name=Node Custom Paint 5)"/>
            <visualProperty name="NODE_CUSTOMPAINT_9" default="DefaultVisualizableVisualProperty(id=NODE_CUSTOMPAINT_9, name=Node Custom Paint 9)"/>
            <visualProperty name="NODE_DEPTH" default="0.0"/>
            <visualProperty name="COMPOUND_NODE_SHAPE" default="ROUND_RECTANGLE"/>
            <visualProperty name="NODE_LABEL_COLOR" default="#333333"/>
        </node>
        <edge>
            <dependency name="arrowColorMatchesEdge" value="false"/>
            <visualProperty name="EDGE_VISIBLE" default="true"/>
            <visualProperty name="EDGE_LABEL_COLOR" default="#000000"/>
            <visualProperty name="EDGE_STROKE_SELECTED_PAINT" default="#FF0000"/>
            <visualProperty name="EDGE_CURVED" default="true"/>
            <visualProperty name="EDGE_SELECTED" default="false"/>
            <visualProperty name="EDGE_LABEL" default=""/>
            <visualProperty name="EDGE_STROKE_UNSELECTED_PAINT" default="#4C4C4C"/>
            <visualProperty name="EDGE_LABEL_WIDTH" default="200.0"/>
            <visualProperty name="EDGE_TRANSPARENCY" default="255"/>
            <visualProperty name="EDGE_UNSELECTED_PAINT" default="#404040"/>
            <visualProperty name="EDGE_LABEL_FONT_FACE" default="SansSerif.plain,plain,10"/>
            <visualProperty name="EDGE_LINE_TYPE" default="SOLID"/>
            <visualProperty name="EDGE_SOURCE_ARROW_SELECTED_PAINT" default="#FFFF00"/>
            <visualProperty name="EDGE_LABEL_FONT_SIZE" default="10"/>
            <visualProperty name="EDGE_SOURCE_ARROW_UNSELECTED_PAINT" default="#000000"/>
            <visualProperty name="EDGE_WIDTH" default="2.0"/>
            <visualProperty name="EDGE_PAINT" default="#808080"/>
            <visualProperty name="EDGE_TARGET_ARROW_UNSELECTED_PAINT" default="#000000"/>
            <visualProperty name="EDGE_LABEL_TRANSPARENCY" default="255"/>
            <visualProperty name="EDGE_TOOLTIP" default=""/>
            <visualProperty name="EDGE_TARGET_ARROW_SHAPE" default="NONE"/>
            <visualProperty name="EDGE_SELECTED_PAINT" default="#FF0000"/>
            <visualProperty name="EDGE_BEND" default=""/>
            <visualProperty name="EDGE_TARGET_ARROW_SELECTED_PAINT" default="#FFFF00"/>
            <visualProperty name="EDGE_SOURCE_ARROW_SHAPE" default="NONE"/>
        </edge>
    </visualStyle>
    <visualStyle name="size_rank_1">
        <network>
            <visualProperty name="NETWORK_TITLE" default=""/>
            <visualProperty name="NETWORK_EDGE_SELECTION" default="true"/>
            <visualProperty name="NETWORK_SIZE" default="550.0"/>
            <visualProperty name="NETWORK_BACKGROUND_PAINT" default="#EBEBEB"/>
            <visualProperty name="NETWORK_WIDTH" default="550.0"/>
            <visualProperty name="NETWORK_NODE_SELECTION" default="true"/>
            <visualProperty name="NETWORK_CENTER_Z_LOCATION" default="0.0"/>
            <visualProperty name="NETWORK_CENTER_X_LOCATION" default="0.0"/>
            <visualProperty name="NETWORK_SCALE_FACTOR" default="1.0"/>
            <visualProperty name="NETWORK_DEPTH" default="0.0"/>
            <visualProperty name="NETWORK_HEIGHT" default="400.0"/>
            <visualProperty name="NETWORK_CENTER_Y_LOCATION" default="0.0"/>
        </network>
        <node>
            <dependency name="nodeCustomGraphicsSizeSync" value="true"/>
            <dependency name="nodeSizeLocked" value="true"/>
            <visualProperty name="NODE_CUSTOMGRAPHICS_POSITION_5" default="C,C,c,0.00,0.00"/>
            <visualProperty name="NODE_CUSTOMGRAPHICS_POSITION_6" default="C,C,c,0.00,0.00"/>
            <visualProperty name="NODE_CUSTOMPAINT_1" default="DefaultVisualizableVisualProperty(id=NODE_CUSTOMPAINT_1, name=Node Custom Paint 1)"/>
            <visualProperty name="NODE_BORDER_PAINT" default="#000000"/>
            <visualProperty name="NODE_CUSTOMGRAPHICS_SIZE_5" default="50.0"/>
            <visualProperty name="NODE_CUSTOMGRAPHICS_SIZE_8" default="50.0"/>
            <visualProperty name="NODE_CUSTOMGRAPHICS_8" default="org.cytoscape.ding.customgraphics.NullCustomGraphics,0,[ Remove Graphics ],"/>
            <visualProperty name="NODE_CUSTOMGRAPHICS_SIZE_7" default="50.0"/>
            <visualProperty name="NODE_CUSTOMPAINT_6" default="DefaultVisualizableVisualProperty(id=NODE_CUSTOMPAINT_6, name=Node Custom Paint 6)"/>
            <visualProperty name="NODE_CUSTOMGRAPHICS_SIZE_6" default="50.0"/>
            <visualProperty name="NODE_LABEL_WIDTH" default="200.0"/>
            <visualProperty name="NODE_CUSTOMGRAPHICS_POSITION_7" default="C,C,c,0.00,0.00"/>
            <visualProperty name="NODE_CUSTOMGRAPHICS_SIZE_9" default="50.0"/>
            <visualProperty name="NODE_SIZE" default="12.0">
                <continuousMapping attributeType="float" attributeName="diffusion_output__rank">
                    <continuousMappingPoint lesserValue="1.0" greaterValue="39.11245096536507" equalValue="39.11245096536507" attrValue="0.0"/>
                    <continuousMappingPoint lesserValue="13.821692732043733" greaterValue="1.0" equalValue="13.821692732043733" attrValue="99.0"/>
                </continuousMapping>
            </visualProperty>
            <visualProperty name="NODE_PAINT" default="#787878"/>
            <visualProperty name="NODE_CUSTOMGRAPHICS_SIZE_4" default="50.0"/>
            <visualProperty name="NODE_CUSTOMGRAPHICS_3" default="org.cytoscape.ding.customgraphics.NullCustomGraphics,0,[ Remove Graphics ],"/>
            <visualProperty name="NODE_LABEL_POSITION" default="C,C,c,0.00,0.00"/>
            <visualProperty name="NODE_CUSTOMGRAPHICS_POSITION_4" default="C,C,c,0.00,0.00"/>
            <visualProperty name="NODE_CUSTOMGRAPHICS_7" default="org.cytoscape.ding.customgraphics.NullCustomGraphics,0,[ Remove Graphics ],"/>
            <visualProperty name="NODE_Z_LOCATION" default="0.0"/>
            <visualProperty name="NODE_CUSTOMGRAPHICS_4" default="org.cytoscape.ding.customgraphics.NullCustomGraphics,0,[ Remove Graphics ],"/>
            <visualProperty name="NODE_CUSTOMGRAPHICS_POSITION_3" default="C,C,c,0.00,0.00"/>
            <visualProperty name="NODE_NESTED_NETWORK_IMAGE_VISIBLE" default="true"/>
            <visualProperty name="NODE_TRANSPARENCY" default="255"/>
            <visualProperty name="COMPOUND_NODE_PADDING" default="10.0"/>
            <visualProperty name="NODE_WIDTH" default="50.0"/>
            <visualProperty name="NODE_CUSTOMGRAPHICS_POSITION_8" default="C,C,c,0.00,0.00"/>
            <visualProperty name="NODE_CUSTOMGRAPHICS_1" default="org.cytoscape.ding.customgraphics.NullCustomGraphics,0,[ Remove Graphics ],"/>
            <visualProperty name="NODE_LABEL_FONT_SIZE" default="9"/>
            <visualProperty name="NODE_Y_LOCATION" default="0.0"/>
            <visualProperty name="NODE_LABEL_FONT_FACE" default="SansSerif.plain,plain,12"/>
            <visualProperty name="NODE_CUSTOMPAINT_4" default="DefaultVisualizableVisualProperty(id=NODE_CUSTOMPAINT_4, name=Node Custom Paint 4)"/>
            <visualProperty name="NODE_CUSTOMPAINT_7" default="DefaultVisualizableVisualProperty(id=NODE_CUSTOMPAINT_7, name=Node Custom Paint 7)"/>
            <visualProperty name="NODE_CUSTOMGRAPHICS_5" default="org.cytoscape.ding.customgraphics.NullCustomGraphics,0,[ Remove Graphics ],"/>
            <visualProperty name="NODE_CUSTOMGRAPHICS_SIZE_2" default="50.0"/>
            <visualProperty name="NODE_BORDER_STROKE" default="SOLID"/>
            <visualProperty name="NODE_LABEL_TRANSPARENCY" default="255"/>
            <visualProperty name="NODE_TOOLTIP" default=""/>
            <visualProperty name="NODE_SELECTED_PAINT" default="#FFFF00"/>
            <visualProperty name="NODE_FILL_COLOR" default="#CCCCFF"/>
            <visualProperty name="NODE_CUSTOMGRAPHICS_POSITION_1" default="C,C,c,0.00,0.00"/>
            <visualProperty name="NODE_CUSTOMGRAPHICS_POSITION_2" default="C,C,c,0.00,0.00"/>
            <visualProperty name="NODE_CUSTOMGRAPHICS_SIZE_3" default="50.0"/>
            <visualProperty name="NODE_BORDER_TRANSPARENCY" default="255"/>
            <visualProperty name="NODE_CUSTOMPAINT_2" default="DefaultVisualizableVisualProperty(id=NODE_CUSTOMPAINT_2, name=Node Custom Paint 2)"/>
            <visualProperty name="NODE_CUSTOMGRAPHICS_9" default="org.cytoscape.ding.customgraphics.NullCustomGraphics,0,[ Remove Graphics ],"/>
            <visualProperty name="NODE_CUSTOMGRAPHICS_SIZE_1" default="50.0"/>
            <visualProperty name="NODE_SELECTED" default="false"/>
            <visualProperty name="NODE_CUSTOMPAINT_8" default="DefaultVisualizableVisualProperty(id=NODE_CUSTOMPAINT_8, name=Node Custom Paint 8)"/>
            <visualProperty name="NODE_X_LOCATION" default="0.0"/>
            <visualProperty name="NODE_CUSTOMGRAPHICS_6" default="org.cytoscape.ding.customgraphics.NullCustomGraphics,0,[ Remove Graphics ],"/>
            <visualProperty name="NODE_SHAPE" default="RECTANGLE"/>
            <visualProperty name="NODE_HEIGHT" default="50.0"/>
            <visualProperty name="NODE_LABEL" default="">
                <passthroughMapping attributeType="string" attributeName="name"/>
            </visualProperty>
            <visualProperty name="NODE_CUSTOMGRAPHICS_2" default="org.cytoscape.ding.customgraphics.NullCustomGraphics,0,[ Remove Graphics ],"/>
            <visualProperty name="NODE_BORDER_WIDTH" default="0.0"/>
            <visualProperty name="NODE_CUSTOMGRAPHICS_POSITION_9" default="C,C,c,0.00,0.00"/>
            <visualProperty name="NODE_CUSTOMPAINT_3" default="DefaultVisualizableVisualProperty(id=NODE_CUSTOMPAINT_3, name=Node Custom Paint 3)"/>
            <visualProperty name="NODE_VISIBLE" default="true"/>
            <visualProperty name="NODE_CUSTOMPAINT_5" default="DefaultVisualizableVisualProperty(id=NODE_CUSTOMPAINT_5, name=Node Custom Paint 5)"/>
            <visualProperty name="NODE_CUSTOMPAINT_9" default="DefaultVisualizableVisualProperty(id=NODE_CUSTOMPAINT_9, name=Node Custom Paint 9)"/>
            <visualProperty name="NODE_DEPTH" default="0.0"/>
            <visualProperty name="COMPOUND_NODE_SHAPE" default="ROUND_RECTANGLE"/>
            <visualProperty name="NODE_LABEL_COLOR" default="#333333"/>
        </node>
        <edge>
            <dependency name="arrowColorMatchesEdge" value="false"/>
            <visualProperty name="EDGE_VISIBLE" default="true"/>
            <visualProperty name="EDGE_LABEL_COLOR" default="#000000"/>
            <visualProperty name="EDGE_STROKE_SELECTED_PAINT" default="#FF0000"/>
            <visualProperty name="EDGE_CURVED" default="true"/>
            <visualProperty name="EDGE_SELECTED" default="false"/>
            <visualProperty name="EDGE_LABEL" default=""/>
            <visualProperty name="EDGE_STROKE_UNSELECTED_PAINT" default="#4C4C4C"/>
            <visualProperty name="EDGE_LABEL_WIDTH" default="200.0"/>
            <visualProperty name="EDGE_TRANSPARENCY" default="255"/>
            <visualProperty name="EDGE_UNSELECTED_PAINT" default="#404040"/>
            <visualProperty name="EDGE_LABEL_FONT_FACE" default="SansSerif.plain,plain,10"/>
            <visualProperty name="EDGE_LINE_TYPE" default="SOLID"/>
            <visualProperty name="EDGE_SOURCE_ARROW_SELECTED_PAINT" default="#FFFF00"/>
            <visualProperty name="EDGE_LABEL_FONT_SIZE" default="10"/>
            <visualProperty name="EDGE_SOURCE_ARROW_UNSELECTED_PAINT" default="#000000"/>
            <visualProperty name="EDGE_TARGET_ARROW_SIZE" default="6.0"/>
            <visualProperty name="EDGE_WIDTH" default="2.0"/>
            <visualProperty name="EDGE_PAINT" default="#808080"/>
            <visualProperty name="EDGE_TARGET_ARROW_UNSELECTED_PAINT" default="#000000"/>
            <visualProperty name="EDGE_LABEL_TRANSPARENCY" default="255"/>
            <visualProperty name="EDGE_TOOLTIP" default=""/>
            <visualProperty name="EDGE_TARGET_ARROW_SHAPE" default="NONE"/>
            <visualProperty name="EDGE_SOURCE_ARROW_SIZE" default="6.0"/>
            <visualProperty name="EDGE_SELECTED_PAINT" default="#FF0000"/>
            <visualProperty name="EDGE_BEND" default=""/>
            <visualProperty name="EDGE_TARGET_ARROW_SELECTED_PAINT" default="#FFFF00"/>
            <visualProperty name="EDGE_SOURCE_ARROW_SHAPE" default="NONE"/>
        </edge>
    </visualStyle>
    <visualStyle name="Nested Network Style">
        <network>
            <visualProperty name="NETWORK_TITLE" default=""/>
            <visualProperty name="NETWORK_EDGE_SELECTION" default="true"/>
            <visualProperty name="NETWORK_BACKGROUND_PAINT" default="#FFFFFF"/>
            <visualProperty name="NETWORK_WIDTH" default="550.0"/>
            <visualProperty name="NETWORK_NODE_SELECTION" default="true"/>
            <visualProperty name="NETWORK_CENTER_Z_LOCATION" default="0.0"/>
            <visualProperty name="NETWORK_CENTER_X_LOCATION" default="0.0"/>
            <visualProperty name="NETWORK_SCALE_FACTOR" default="1.0"/>
            <visualProperty name="NETWORK_DEPTH" default="0.0"/>
            <visualProperty name="NETWORK_HEIGHT" default="400.0"/>
            <visualProperty name="NETWORK_CENTER_Y_LOCATION" default="0.0"/>
        </network>
        <node>
            <dependency name="nodeCustomGraphicsSizeSync" value="false"/>
            <dependency name="nodeSizeLocked" value="false"/>
            <visualProperty name="NODE_CUSTOMGRAPHICS_POSITION_5" default="C,C,c,0.00,0.00"/>
            <visualProperty name="NODE_CUSTOMGRAPHICS_POSITION_6" default="C,C,c,0.00,0.00"/>
            <visualProperty name="NODE_BORDER_PAINT" default="#000000">
                <discreteMapping attributeType="boolean" attributeName="has_nested_network">
                    <discreteMappingEntry value="#0066CC" attributeValue="true"/>
                </discreteMapping>
            </visualProperty>
            <visualProperty name="NODE_CUSTOMGRAPHICS_SIZE_5" default="50.0"/>
            <visualProperty name="NODE_CUSTOMGRAPHICS_SIZE_8" default="50.0"/>
            <visualProperty name="NODE_CUSTOMGRAPHICS_8" default="org.cytoscape.ding.customgraphics.NullCustomGraphics,0,[ Remove Graphics ],"/>
            <visualProperty name="NODE_CUSTOMGRAPHICS_SIZE_7" default="50.0"/>
            <visualProperty name="NODE_CUSTOMGRAPHICS_SIZE_6" default="50.0"/>
            <visualProperty name="NODE_LABEL_WIDTH" default="200.0"/>
            <visualProperty name="NODE_CUSTOMGRAPHICS_POSITION_7" default="C,C,c,0.00,0.00"/>
            <visualProperty name="NODE_CUSTOMGRAPHICS_SIZE_9" default="50.0"/>
            <visualProperty name="NODE_CUSTOMGRAPHICS_SIZE_4" default="50.0"/>
            <visualProperty name="NODE_CUSTOMGRAPHICS_3" default="org.cytoscape.ding.customgraphics.NullCustomGraphics,0,[ Remove Graphics ],"/>
            <visualProperty name="NODE_LABEL_POSITION" default="C,C,c,0.00,0.00">
                <discreteMapping attributeType="boolean" attributeName="has_nested_network">
                    <discreteMappingEntry value="SE,NW,c,0.00,0.00" attributeValue="true"/>
                </discreteMapping>
            </visualProperty>
            <visualProperty name="NODE_CUSTOMGRAPHICS_POSITION_4" default="C,C,c,0.00,0.00"/>
            <visualProperty name="NODE_CUSTOMGRAPHICS_7" default="org.cytoscape.ding.customgraphics.NullCustomGraphics,0,[ Remove Graphics ],"/>
            <visualProperty name="NODE_Z_LOCATION" default="0.0"/>
            <visualProperty name="NODE_CUSTOMGRAPHICS_4" default="org.cytoscape.ding.customgraphics.NullCustomGraphics,0,[ Remove Graphics ],"/>
            <visualProperty name="NODE_CUSTOMGRAPHICS_POSITION_3" default="C,C,c,0.00,0.00"/>
            <visualProperty name="NODE_NESTED_NETWORK_IMAGE_VISIBLE" default="true"/>
            <visualProperty name="NODE_TRANSPARENCY" default="255"/>
            <visualProperty name="COMPOUND_NODE_PADDING" default="10.0"/>
            <visualProperty name="NODE_WIDTH" default="60.0"/>
            <visualProperty name="NODE_CUSTOMGRAPHICS_POSITION_8" default="C,C,c,0.00,0.00"/>
            <visualProperty name="NODE_CUSTOMGRAPHICS_1" default="org.cytoscape.ding.customgraphics.NullCustomGraphics,0,[ Remove Graphics ],"/>
            <visualProperty name="NODE_LABEL_FONT_SIZE" default="12"/>
            <visualProperty name="NODE_Y_LOCATION" default="0.0"/>
            <visualProperty name="NODE_LABEL_FONT_FACE" default="SansSerif.plain,plain,12"/>
            <visualProperty name="NODE_CUSTOMGRAPHICS_5" default="org.cytoscape.ding.customgraphics.NullCustomGraphics,0,[ Remove Graphics ],"/>
            <visualProperty name="NODE_CUSTOMGRAPHICS_SIZE_2" default="50.0"/>
            <visualProperty name="NODE_BORDER_STROKE" default="SOLID"/>
            <visualProperty name="NODE_LABEL_TRANSPARENCY" default="255"/>
            <visualProperty name="NODE_TOOLTIP" default=""/>
            <visualProperty name="NODE_SELECTED_PAINT" default="#FFFF00"/>
            <visualProperty name="NODE_FILL_COLOR" default="#FFFFFF">
                <discreteMapping attributeType="boolean" attributeName="has_nested_network">
                    <discreteMappingEntry value="#FFFFFF" attributeValue="true"/>
                </discreteMapping>
            </visualProperty>
            <visualProperty name="NODE_CUSTOMGRAPHICS_POSITION_1" default="C,C,c,0.00,0.00"/>
            <visualProperty name="NODE_CUSTOMGRAPHICS_POSITION_2" default="C,C,c,0.00,0.00"/>
            <visualProperty name="NODE_CUSTOMGRAPHICS_SIZE_3" default="50.0"/>
            <visualProperty name="NODE_BORDER_TRANSPARENCY" default="255"/>
            <visualProperty name="NODE_CUSTOMGRAPHICS_9" default="org.cytoscape.ding.customgraphics.NullCustomGraphics,0,[ Remove Graphics ],"/>
            <visualProperty name="NODE_CUSTOMGRAPHICS_SIZE_1" default="50.0"/>
            <visualProperty name="NODE_SELECTED" default="false"/>
            <visualProperty name="NODE_X_LOCATION" default="0.0"/>
            <visualProperty name="NODE_CUSTOMGRAPHICS_6" default="org.cytoscape.ding.customgraphics.NullCustomGraphics,0,[ Remove Graphics ],"/>
            <visualProperty name="NODE_SHAPE" default="ELLIPSE">
                <discreteMapping attributeType="boolean" attributeName="has_nested_network">
                    <discreteMappingEntry value="RECTANGLE" attributeValue="true"/>
                </discreteMapping>
            </visualProperty>
            <visualProperty name="NODE_HEIGHT" default="40.0"/>
            <visualProperty name="NODE_LABEL" default="">
                <passthroughMapping attributeType="string" attributeName="shared name"/>
            </visualProperty>
            <visualProperty name="NODE_CUSTOMGRAPHICS_2" default="org.cytoscape.ding.customgraphics.NullCustomGraphics,0,[ Remove Graphics ],"/>
            <visualProperty name="NODE_BORDER_WIDTH" default="2.0">
                <discreteMapping attributeType="boolean" attributeName="has_nested_network"/>
            </visualProperty>
            <visualProperty name="NODE_CUSTOMGRAPHICS_POSITION_9" default="C,C,c,0.00,0.00"/>
            <visualProperty name="NODE_VISIBLE" default="true"/>
            <visualProperty name="NODE_DEPTH" default="0.0"/>
            <visualProperty name="COMPOUND_NODE_SHAPE" default="ROUND_RECTANGLE"/>
            <visualProperty name="NODE_LABEL_COLOR" default="#000000">
                <discreteMapping attributeType="boolean" attributeName="has_nested_network">
                    <discreteMappingEntry value="#0066CC" attributeValue="true"/>
                </discreteMapping>
            </visualProperty>
        </node>
        <edge>
            <dependency name="arrowColorMatchesEdge" value="false"/>
            <visualProperty name="EDGE_VISIBLE" default="true"/>
            <visualProperty name="EDGE_LABEL_COLOR" default="#000000"/>
            <visualProperty name="EDGE_STROKE_SELECTED_PAINT" default="#FF0000"/>
            <visualProperty name="EDGE_CURVED" default="true"/>
            <visualProperty name="EDGE_SELECTED" default="false"/>
            <visualProperty name="EDGE_LABEL" default=""/>
            <visualProperty name="EDGE_STROKE_UNSELECTED_PAINT" default="#404040"/>
            <visualProperty name="EDGE_LABEL_WIDTH" default="200.0"/>
            <visualProperty name="EDGE_TRANSPARENCY" default="255"/>
            <visualProperty name="EDGE_LABEL_FONT_FACE" default="SansSerif.plain,plain,10"/>
            <visualProperty name="EDGE_LINE_TYPE" default="SOLID"/>
            <visualProperty name="EDGE_SOURCE_ARROW_SELECTED_PAINT" default="#FFFF00"/>
            <visualProperty name="EDGE_LABEL_FONT_SIZE" default="10"/>
            <visualProperty name="EDGE_SOURCE_ARROW_UNSELECTED_PAINT" default="#000000"/>
            <visualProperty name="EDGE_TARGET_ARROW_SIZE" default="6.0"/>
            <visualProperty name="EDGE_WIDTH" default="1.0"/>
            <visualProperty name="EDGE_TARGET_ARROW_UNSELECTED_PAINT" default="#000000"/>
            <visualProperty name="EDGE_LABEL_TRANSPARENCY" default="255"/>
            <visualProperty name="EDGE_TOOLTIP" default=""/>
            <visualProperty name="EDGE_TARGET_ARROW_SHAPE" default="NONE"/>
            <visualProperty name="EDGE_SOURCE_ARROW_SIZE" default="6.0"/>
            <visualProperty name="EDGE_TARGET_ARROW_SELECTED_PAINT" default="#FFFF00"/>
            <visualProperty name="EDGE_SOURCE_ARROW_SHAPE" default="NONE"/>
        </edge>
    </visualStyle>
    <visualStyle name="Ripple">
        <network>
            <visualProperty name="NETWORK_TITLE" default=""/>
            <visualProperty name="NETWORK_EDGE_SELECTION" default="true"/>
            <visualProperty name="NETWORK_SIZE" default="550.0"/>
            <visualProperty name="NETWORK_BACKGROUND_PAINT" default="#FFFFFF"/>
            <visualProperty name="NETWORK_WIDTH" default="550.0"/>
            <visualProperty name="NETWORK_NODE_SELECTION" default="true"/>
            <visualProperty name="NETWORK_CENTER_Z_LOCATION" default="0.0"/>
            <visualProperty name="NETWORK_CENTER_X_LOCATION" default="0.0"/>
            <visualProperty name="NETWORK_SCALE_FACTOR" default="1.0"/>
            <visualProperty name="NETWORK_DEPTH" default="0.0"/>
            <visualProperty name="NETWORK_HEIGHT" default="400.0"/>
            <visualProperty name="NETWORK_CENTER_Y_LOCATION" default="0.0"/>
        </network>
        <node>
            <dependency name="nodeCustomGraphicsSizeSync" value="true"/>
            <dependency name="nodeSizeLocked" value="true"/>
            <visualProperty name="NODE_CUSTOMGRAPHICS_POSITION_5" default="C,C,c,0.00,0.00"/>
            <visualProperty name="NODE_CUSTOMGRAPHICS_POSITION_6" default="C,C,c,0.00,0.00"/>
            <visualProperty name="NODE_CUSTOMPAINT_1" default="DefaultVisualizableVisualProperty(id=NODE_CUSTOMPAINT_1, name=Node Custom Paint 1)"/>
            <visualProperty name="NODE_BORDER_PAINT" default="#3399FF"/>
            <visualProperty name="NODE_CUSTOMGRAPHICS_SIZE_5" default="50.0"/>
            <visualProperty name="NODE_CUSTOMGRAPHICS_SIZE_8" default="50.0"/>
            <visualProperty name="NODE_CUSTOMGRAPHICS_8" default="org.cytoscape.ding.customgraphics.NullCustomGraphics,0,[ Remove Graphics ],"/>
            <visualProperty name="NODE_CUSTOMGRAPHICS_SIZE_7" default="50.0"/>
            <visualProperty name="NODE_CUSTOMPAINT_6" default="DefaultVisualizableVisualProperty(id=NODE_CUSTOMPAINT_6, name=Node Custom Paint 6)"/>
            <visualProperty name="NODE_CUSTOMGRAPHICS_SIZE_6" default="50.0"/>
            <visualProperty name="NODE_LABEL_WIDTH" default="200.0"/>
            <visualProperty name="NODE_CUSTOMGRAPHICS_POSITION_7" default="C,C,c,0.00,0.00"/>
            <visualProperty name="NODE_CUSTOMGRAPHICS_SIZE_9" default="50.0"/>
            <visualProperty name="NODE_SIZE" default="50.0"/>
            <visualProperty name="NODE_PAINT" default="#787878"/>
            <visualProperty name="NODE_CUSTOMGRAPHICS_SIZE_4" default="50.0"/>
            <visualProperty name="NODE_CUSTOMGRAPHICS_3" default="org.cytoscape.ding.customgraphics.NullCustomGraphics,0,[ Remove Graphics ],"/>
            <visualProperty name="NODE_LABEL_POSITION" default="C,C,c,0.00,0.00"/>
            <visualProperty name="NODE_CUSTOMGRAPHICS_POSITION_4" default="C,C,c,0.00,0.00"/>
            <visualProperty name="NODE_CUSTOMGRAPHICS_7" default="org.cytoscape.ding.customgraphics.NullCustomGraphics,0,[ Remove Graphics ],"/>
            <visualProperty name="NODE_Z_LOCATION" default="0.0"/>
            <visualProperty name="NODE_CUSTOMGRAPHICS_4" default="org.cytoscape.ding.customgraphics.NullCustomGraphics,0,[ Remove Graphics ],"/>
            <visualProperty name="NODE_CUSTOMGRAPHICS_POSITION_3" default="C,C,c,0.00,0.00"/>
            <visualProperty name="NODE_NESTED_NETWORK_IMAGE_VISIBLE" default="true"/>
            <visualProperty name="NODE_TRANSPARENCY" default="255"/>
            <visualProperty name="COMPOUND_NODE_PADDING" default="10.0"/>
            <visualProperty name="NODE_WIDTH" default="80.0"/>
            <visualProperty name="NODE_CUSTOMGRAPHICS_POSITION_8" default="C,C,c,0.00,0.00"/>
            <visualProperty name="NODE_CUSTOMGRAPHICS_1" default="org.cytoscape.ding.customgraphics.NullCustomGraphics,0,[ Remove Graphics ],"/>
            <visualProperty name="NODE_LABEL_FONT_SIZE" default="8"/>
            <visualProperty name="NODE_Y_LOCATION" default="0.0"/>
            <visualProperty name="NODE_LABEL_FONT_FACE" default="SansSerif.plain,plain,12"/>
            <visualProperty name="NODE_CUSTOMPAINT_4" default="DefaultVisualizableVisualProperty(id=NODE_CUSTOMPAINT_4, name=Node Custom Paint 4)"/>
            <visualProperty name="NODE_CUSTOMPAINT_7" default="DefaultVisualizableVisualProperty(id=NODE_CUSTOMPAINT_7, name=Node Custom Paint 7)"/>
            <visualProperty name="NODE_CUSTOMGRAPHICS_5" default="org.cytoscape.ding.customgraphics.NullCustomGraphics,0,[ Remove Graphics ],"/>
            <visualProperty name="NODE_CUSTOMGRAPHICS_SIZE_2" default="50.0"/>
            <visualProperty name="NODE_BORDER_STROKE" default="SOLID"/>
            <visualProperty name="NODE_LABEL_TRANSPARENCY" default="255"/>
            <visualProperty name="NODE_TOOLTIP" default=""/>
            <visualProperty name="NODE_SELECTED_PAINT" default="#FFFFCC"/>
            <visualProperty name="NODE_FILL_COLOR" default="#FFFFFF"/>
            <visualProperty name="NODE_CUSTOMGRAPHICS_POSITION_1" default="C,C,c,0.00,0.00"/>
            <visualProperty name="NODE_CUSTOMGRAPHICS_POSITION_2" default="C,C,c,0.00,0.00"/>
            <visualProperty name="NODE_CUSTOMGRAPHICS_SIZE_3" default="50.0"/>
            <visualProperty name="NODE_BORDER_TRANSPARENCY" default="255"/>
            <visualProperty name="NODE_CUSTOMPAINT_2" default="DefaultVisualizableVisualProperty(id=NODE_CUSTOMPAINT_2, name=Node Custom Paint 2)"/>
            <visualProperty name="NODE_CUSTOMGRAPHICS_9" default="org.cytoscape.ding.customgraphics.NullCustomGraphics,0,[ Remove Graphics ],"/>
            <visualProperty name="NODE_CUSTOMGRAPHICS_SIZE_1" default="50.0"/>
            <visualProperty name="NODE_SELECTED" default="false"/>
            <visualProperty name="NODE_CUSTOMPAINT_8" default="DefaultVisualizableVisualProperty(id=NODE_CUSTOMPAINT_8, name=Node Custom Paint 8)"/>
            <visualProperty name="NODE_X_LOCATION" default="0.0"/>
            <visualProperty name="NODE_CUSTOMGRAPHICS_6" default="org.cytoscape.ding.customgraphics.NullCustomGraphics,0,[ Remove Graphics ],"/>
            <visualProperty name="NODE_SHAPE" default="ELLIPSE"/>
            <visualProperty name="NODE_HEIGHT" default="80.0"/>
            <visualProperty name="NODE_LABEL" default="">
                <passthroughMapping attributeType="string" attributeName="name"/>
            </visualProperty>
            <visualProperty name="NODE_CUSTOMGRAPHICS_2" default="org.cytoscape.ding.customgraphics.NullCustomGraphics,0,[ Remove Graphics ],"/>
            <visualProperty name="NODE_BORDER_WIDTH" default="20.0"/>
            <visualProperty name="NODE_CUSTOMGRAPHICS_POSITION_9" default="C,C,c,0.00,0.00"/>
            <visualProperty name="NODE_CUSTOMPAINT_3" default="DefaultVisualizableVisualProperty(id=NODE_CUSTOMPAINT_3, name=Node Custom Paint 3)"/>
            <visualProperty name="NODE_VISIBLE" default="true"/>
            <visualProperty name="NODE_CUSTOMPAINT_5" default="DefaultVisualizableVisualProperty(id=NODE_CUSTOMPAINT_5, name=Node Custom Paint 5)"/>
            <visualProperty name="NODE_CUSTOMPAINT_9" default="DefaultVisualizableVisualProperty(id=NODE_CUSTOMPAINT_9, name=Node Custom Paint 9)"/>
            <visualProperty name="NODE_DEPTH" default="0.0"/>
            <visualProperty name="COMPOUND_NODE_SHAPE" default="ROUND_RECTANGLE"/>
            <visualProperty name="NODE_LABEL_COLOR" default="#133A60"/>
        </node>
        <edge>
            <dependency name="arrowColorMatchesEdge" value="false"/>
            <visualProperty name="EDGE_VISIBLE" default="true"/>
            <visualProperty name="EDGE_LABEL_COLOR" default="#000000"/>
            <visualProperty name="EDGE_STROKE_SELECTED_PAINT" default="#FF0000"/>
            <visualProperty name="EDGE_CURVED" default="true"/>
            <visualProperty name="EDGE_SELECTED" default="false"/>
            <visualProperty name="EDGE_LABEL" default=""/>
            <visualProperty name="EDGE_STROKE_UNSELECTED_PAINT" default="#3399FF"/>
            <visualProperty name="EDGE_LABEL_WIDTH" default="200.0"/>
            <visualProperty name="EDGE_TRANSPARENCY" default="255"/>
            <visualProperty name="EDGE_UNSELECTED_PAINT" default="#404040"/>
            <visualProperty name="EDGE_LABEL_FONT_FACE" default="SansSerif.plain,plain,10"/>
            <visualProperty name="EDGE_LINE_TYPE" default="SOLID"/>
            <visualProperty name="EDGE_SOURCE_ARROW_SELECTED_PAINT" default="#FFFF00"/>
            <visualProperty name="EDGE_LABEL_FONT_SIZE" default="10"/>
            <visualProperty name="EDGE_SOURCE_ARROW_UNSELECTED_PAINT" default="#000000"/>
            <visualProperty name="EDGE_TARGET_ARROW_SIZE" default="6.0"/>
            <visualProperty name="EDGE_WIDTH" default="3.0"/>
            <visualProperty name="EDGE_PAINT" default="#808080"/>
            <visualProperty name="EDGE_TARGET_ARROW_UNSELECTED_PAINT" default="#000000"/>
            <visualProperty name="EDGE_LABEL_TRANSPARENCY" default="255"/>
            <visualProperty name="EDGE_TOOLTIP" default=""/>
            <visualProperty name="EDGE_TARGET_ARROW_SHAPE" default="NONE"/>
            <visualProperty name="EDGE_SOURCE_ARROW_SIZE" default="6.0"/>
            <visualProperty name="EDGE_SELECTED_PAINT" default="#FF0000"/>
            <visualProperty name="EDGE_BEND" default=""/>
            <visualProperty name="EDGE_TARGET_ARROW_SELECTED_PAINT" default="#FFFF00"/>
            <visualProperty name="EDGE_SOURCE_ARROW_SHAPE" default="NONE"/>
        </edge>
    </visualStyle>
    <visualStyle name="size_rank_5">
        <network>
            <visualProperty name="NETWORK_TITLE" default=""/>
            <visualProperty name="NETWORK_EDGE_SELECTION" default="true"/>
            <visualProperty name="NETWORK_SIZE" default="550.0"/>
            <visualProperty name="NETWORK_BACKGROUND_PAINT" default="#EBEBEB"/>
            <visualProperty name="NETWORK_WIDTH" default="550.0"/>
            <visualProperty name="NETWORK_NODE_SELECTION" default="true"/>
            <visualProperty name="NETWORK_CENTER_Z_LOCATION" default="0.0"/>
            <visualProperty name="NETWORK_CENTER_X_LOCATION" default="0.0"/>
            <visualProperty name="NETWORK_SCALE_FACTOR" default="1.0"/>
            <visualProperty name="NETWORK_DEPTH" default="0.0"/>
            <visualProperty name="NETWORK_HEIGHT" default="400.0"/>
            <visualProperty name="NETWORK_CENTER_Y_LOCATION" default="0.0"/>
        </network>
        <node>
            <dependency name="nodeCustomGraphicsSizeSync" value="true"/>
            <dependency name="nodeSizeLocked" value="true"/>
            <visualProperty name="NODE_CUSTOMGRAPHICS_POSITION_5" default="C,C,c,0.00,0.00"/>
            <visualProperty name="NODE_CUSTOMGRAPHICS_POSITION_6" default="C,C,c,0.00,0.00"/>
            <visualProperty name="NODE_CUSTOMPAINT_1" default="DefaultVisualizableVisualProperty(id=NODE_CUSTOMPAINT_1, name=Node Custom Paint 1)"/>
            <visualProperty name="NODE_BORDER_PAINT" default="#000000"/>
            <visualProperty name="NODE_CUSTOMGRAPHICS_SIZE_5" default="50.0"/>
            <visualProperty name="NODE_CUSTOMGRAPHICS_SIZE_8" default="50.0"/>
            <visualProperty name="NODE_CUSTOMGRAPHICS_8" default="org.cytoscape.ding.customgraphics.NullCustomGraphics,0,[ Remove Graphics ],"/>
            <visualProperty name="NODE_CUSTOMGRAPHICS_SIZE_7" default="50.0"/>
            <visualProperty name="NODE_CUSTOMPAINT_6" default="DefaultVisualizableVisualProperty(id=NODE_CUSTOMPAINT_6, name=Node Custom Paint 6)"/>
            <visualProperty name="NODE_CUSTOMGRAPHICS_SIZE_6" default="50.0"/>
            <visualProperty name="NODE_LABEL_WIDTH" default="200.0"/>
            <visualProperty name="NODE_CUSTOMGRAPHICS_POSITION_7" default="C,C,c,0.00,0.00"/>
            <visualProperty name="NODE_CUSTOMGRAPHICS_SIZE_9" default="50.0"/>
            <visualProperty name="NODE_SIZE" default="12.0">
                <continuousMapping attributeType="float" attributeName="diffusion_output__rank">
                    <continuousMappingPoint lesserValue="1.0" greaterValue="39.11245096536507" equalValue="39.11245096536507" attrValue="0.0"/>
                    <continuousMappingPoint lesserValue="13.821692732043733" greaterValue="1.0" equalValue="13.821692732043733" attrValue="99.0"/>
                </continuousMapping>
            </visualProperty>
            <visualProperty name="NODE_PAINT" default="#787878"/>
            <visualProperty name="NODE_CUSTOMGRAPHICS_SIZE_4" default="50.0"/>
            <visualProperty name="NODE_CUSTOMGRAPHICS_3" default="org.cytoscape.ding.customgraphics.NullCustomGraphics,0,[ Remove Graphics ],"/>
            <visualProperty name="NODE_LABEL_POSITION" default="C,C,c,0.00,0.00"/>
            <visualProperty name="NODE_CUSTOMGRAPHICS_POSITION_4" default="C,C,c,0.00,0.00"/>
            <visualProperty name="NODE_CUSTOMGRAPHICS_7" default="org.cytoscape.ding.customgraphics.NullCustomGraphics,0,[ Remove Graphics ],"/>
            <visualProperty name="NODE_Z_LOCATION" default="0.0"/>
            <visualProperty name="NODE_CUSTOMGRAPHICS_4" default="org.cytoscape.ding.customgraphics.NullCustomGraphics,0,[ Remove Graphics ],"/>
            <visualProperty name="NODE_CUSTOMGRAPHICS_POSITION_3" default="C,C,c,0.00,0.00"/>
            <visualProperty name="NODE_NESTED_NETWORK_IMAGE_VISIBLE" default="true"/>
            <visualProperty name="NODE_TRANSPARENCY" default="255"/>
            <visualProperty name="COMPOUND_NODE_PADDING" default="10.0"/>
            <visualProperty name="NODE_WIDTH" default="50.0"/>
            <visualProperty name="NODE_CUSTOMGRAPHICS_POSITION_8" default="C,C,c,0.00,0.00"/>
            <visualProperty name="NODE_CUSTOMGRAPHICS_1" default="org.cytoscape.ding.customgraphics.NullCustomGraphics,0,[ Remove Graphics ],"/>
            <visualProperty name="NODE_LABEL_FONT_SIZE" default="9"/>
            <visualProperty name="NODE_Y_LOCATION" default="0.0"/>
            <visualProperty name="NODE_LABEL_FONT_FACE" default="SansSerif.plain,plain,12"/>
            <visualProperty name="NODE_CUSTOMPAINT_4" default="DefaultVisualizableVisualProperty(id=NODE_CUSTOMPAINT_4, name=Node Custom Paint 4)"/>
            <visualProperty name="NODE_CUSTOMPAINT_7" default="DefaultVisualizableVisualProperty(id=NODE_CUSTOMPAINT_7, name=Node Custom Paint 7)"/>
            <visualProperty name="NODE_CUSTOMGRAPHICS_5" default="org.cytoscape.ding.customgraphics.NullCustomGraphics,0,[ Remove Graphics ],"/>
            <visualProperty name="NODE_CUSTOMGRAPHICS_SIZE_2" default="50.0"/>
            <visualProperty name="NODE_BORDER_STROKE" default="SOLID"/>
            <visualProperty name="NODE_LABEL_TRANSPARENCY" default="255"/>
            <visualProperty name="NODE_TOOLTIP" default=""/>
            <visualProperty name="NODE_SELECTED_PAINT" default="#FFFF00"/>
            <visualProperty name="NODE_FILL_COLOR" default="#CCCCFF"/>
            <visualProperty name="NODE_CUSTOMGRAPHICS_POSITION_1" default="C,C,c,0.00,0.00"/>
            <visualProperty name="NODE_CUSTOMGRAPHICS_POSITION_2" default="C,C,c,0.00,0.00"/>
            <visualProperty name="NODE_CUSTOMGRAPHICS_SIZE_3" default="50.0"/>
            <visualProperty name="NODE_BORDER_TRANSPARENCY" default="255"/>
            <visualProperty name="NODE_CUSTOMPAINT_2" default="DefaultVisualizableVisualProperty(id=NODE_CUSTOMPAINT_2, name=Node Custom Paint 2)"/>
            <visualProperty name="NODE_CUSTOMGRAPHICS_9" default="org.cytoscape.ding.customgraphics.NullCustomGraphics,0,[ Remove Graphics ],"/>
            <visualProperty name="NODE_CUSTOMGRAPHICS_SIZE_1" default="50.0"/>
            <visualProperty name="NODE_SELECTED" default="false"/>
            <visualProperty name="NODE_CUSTOMPAINT_8" default="DefaultVisualizableVisualProperty(id=NODE_CUSTOMPAINT_8, name=Node Custom Paint 8)"/>
            <visualProperty name="NODE_X_LOCATION" default="0.0"/>
            <visualProperty name="NODE_CUSTOMGRAPHICS_6" default="org.cytoscape.ding.customgraphics.NullCustomGraphics,0,[ Remove Graphics ],"/>
            <visualProperty name="NODE_SHAPE" default="RECTANGLE"/>
            <visualProperty name="NODE_HEIGHT" default="50.0"/>
            <visualProperty name="NODE_LABEL" default="">
                <passthroughMapping attributeType="string" attributeName="name"/>
            </visualProperty>
            <visualProperty name="NODE_CUSTOMGRAPHICS_2" default="org.cytoscape.ding.customgraphics.NullCustomGraphics,0,[ Remove Graphics ],"/>
            <visualProperty name="NODE_BORDER_WIDTH" default="0.0"/>
            <visualProperty name="NODE_CUSTOMGRAPHICS_POSITION_9" default="C,C,c,0.00,0.00"/>
            <visualProperty name="NODE_CUSTOMPAINT_3" default="DefaultVisualizableVisualProperty(id=NODE_CUSTOMPAINT_3, name=Node Custom Paint 3)"/>
            <visualProperty name="NODE_VISIBLE" default="true"/>
            <visualProperty name="NODE_CUSTOMPAINT_5" default="DefaultVisualizableVisualProperty(id=NODE_CUSTOMPAINT_5, name=Node Custom Paint 5)"/>
            <visualProperty name="NODE_CUSTOMPAINT_9" default="DefaultVisualizableVisualProperty(id=NODE_CUSTOMPAINT_9, name=Node Custom Paint 9)"/>
            <visualProperty name="NODE_DEPTH" default="0.0"/>
            <visualProperty name="COMPOUND_NODE_SHAPE" default="ROUND_RECTANGLE"/>
            <visualProperty name="NODE_LABEL_COLOR" default="#333333"/>
        </node>
        <edge>
            <dependency name="arrowColorMatchesEdge" value="false"/>
            <visualProperty name="EDGE_VISIBLE" default="true"/>
            <visualProperty name="EDGE_LABEL_COLOR" default="#000000"/>
            <visualProperty name="EDGE_STROKE_SELECTED_PAINT" default="#FF0000"/>
            <visualProperty name="EDGE_CURVED" default="true"/>
            <visualProperty name="EDGE_SELECTED" default="false"/>
            <visualProperty name="EDGE_LABEL" default=""/>
            <visualProperty name="EDGE_STROKE_UNSELECTED_PAINT" default="#4C4C4C"/>
            <visualProperty name="EDGE_LABEL_WIDTH" default="200.0"/>
            <visualProperty name="EDGE_TRANSPARENCY" default="255"/>
            <visualProperty name="EDGE_UNSELECTED_PAINT" default="#404040"/>
            <visualProperty name="EDGE_LABEL_FONT_FACE" default="SansSerif.plain,plain,10"/>
            <visualProperty name="EDGE_LINE_TYPE" default="SOLID"/>
            <visualProperty name="EDGE_SOURCE_ARROW_SELECTED_PAINT" default="#FFFF00"/>
            <visualProperty name="EDGE_LABEL_FONT_SIZE" default="10"/>
            <visualProperty name="EDGE_SOURCE_ARROW_UNSELECTED_PAINT" default="#000000"/>
            <visualProperty name="EDGE_WIDTH" default="2.0"/>
            <visualProperty name="EDGE_PAINT" default="#808080"/>
            <visualProperty name="EDGE_TARGET_ARROW_UNSELECTED_PAINT" default="#000000"/>
            <visualProperty name="EDGE_LABEL_TRANSPARENCY" default="255"/>
            <visualProperty name="EDGE_TOOLTIP" default=""/>
            <visualProperty name="EDGE_TARGET_ARROW_SHAPE" default="NONE"/>
            <visualProperty name="EDGE_SELECTED_PAINT" default="#FF0000"/>
            <visualProperty name="EDGE_BEND" default=""/>
            <visualProperty name="EDGE_TARGET_ARROW_SELECTED_PAINT" default="#FFFF00"/>
            <visualProperty name="EDGE_SOURCE_ARROW_SHAPE" default="NONE"/>
        </edge>
    </visualStyle>
    <visualStyle name="Big Labels">
        <network>
            <visualProperty name="NETWORK_TITLE" default=""/>
            <visualProperty name="NETWORK_EDGE_SELECTION" default="true"/>
            <visualProperty name="NETWORK_SIZE" default="550.0"/>
            <visualProperty name="NETWORK_BACKGROUND_PAINT" default="#FFFFFF"/>
            <visualProperty name="NETWORK_WIDTH" default="550.0"/>
            <visualProperty name="NETWORK_NODE_SELECTION" default="true"/>
            <visualProperty name="NETWORK_CENTER_Z_LOCATION" default="0.0"/>
            <visualProperty name="NETWORK_CENTER_X_LOCATION" default="0.0"/>
            <visualProperty name="NETWORK_SCALE_FACTOR" default="1.0"/>
            <visualProperty name="NETWORK_DEPTH" default="0.0"/>
            <visualProperty name="NETWORK_HEIGHT" default="400.0"/>
            <visualProperty name="NETWORK_CENTER_Y_LOCATION" default="0.0"/>
        </network>
        <node>
            <dependency name="nodeCustomGraphicsSizeSync" value="true"/>
            <dependency name="nodeSizeLocked" value="true"/>
            <visualProperty name="NODE_CUSTOMGRAPHICS_POSITION_5" default="C,C,c,0.00,0.00"/>
            <visualProperty name="NODE_CUSTOMGRAPHICS_POSITION_6" default="C,C,c,0.00,0.00"/>
            <visualProperty name="NODE_CUSTOMPAINT_1" default="DefaultVisualizableVisualProperty(id=NODE_CUSTOMPAINT_1, name=Node Custom Paint 1)"/>
            <visualProperty name="NODE_BORDER_PAINT" default="#000000"/>
            <visualProperty name="NODE_CUSTOMGRAPHICS_SIZE_5" default="50.0"/>
            <visualProperty name="NODE_CUSTOMGRAPHICS_SIZE_8" default="50.0"/>
            <visualProperty name="NODE_CUSTOMGRAPHICS_8" default="org.cytoscape.ding.customgraphics.NullCustomGraphics,0,[ Remove Graphics ],"/>
            <visualProperty name="NODE_CUSTOMGRAPHICS_SIZE_7" default="50.0"/>
            <visualProperty name="NODE_CUSTOMPAINT_6" default="DefaultVisualizableVisualProperty(id=NODE_CUSTOMPAINT_6, name=Node Custom Paint 6)"/>
            <visualProperty name="NODE_CUSTOMGRAPHICS_SIZE_6" default="50.0"/>
            <visualProperty name="NODE_LABEL_WIDTH" default="200.0"/>
            <visualProperty name="NODE_CUSTOMGRAPHICS_POSITION_7" default="C,C,c,0.00,0.00"/>
            <visualProperty name="NODE_CUSTOMGRAPHICS_SIZE_9" default="50.0"/>
            <visualProperty name="NODE_SIZE" default="5.0"/>
            <visualProperty name="NODE_PAINT" default="#787878"/>
            <visualProperty name="NODE_CUSTOMGRAPHICS_SIZE_4" default="50.0"/>
            <visualProperty name="NODE_CUSTOMGRAPHICS_3" default="org.cytoscape.ding.customgraphics.NullCustomGraphics,0,[ Remove Graphics ],"/>
            <visualProperty name="NODE_LABEL_POSITION" default="C,C,c,0.00,0.00"/>
            <visualProperty name="NODE_CUSTOMGRAPHICS_POSITION_4" default="C,C,c,0.00,0.00"/>
            <visualProperty name="NODE_CUSTOMGRAPHICS_7" default="org.cytoscape.ding.customgraphics.NullCustomGraphics,0,[ Remove Graphics ],"/>
            <visualProperty name="NODE_Z_LOCATION" default="0.0"/>
            <visualProperty name="NODE_CUSTOMGRAPHICS_4" default="org.cytoscape.ding.customgraphics.NullCustomGraphics,0,[ Remove Graphics ],"/>
            <visualProperty name="NODE_CUSTOMGRAPHICS_POSITION_3" default="C,C,c,0.00,0.00"/>
            <visualProperty name="NODE_NESTED_NETWORK_IMAGE_VISIBLE" default="true"/>
            <visualProperty name="NODE_TRANSPARENCY" default="255"/>
            <visualProperty name="COMPOUND_NODE_PADDING" default="10.0"/>
            <visualProperty name="NODE_WIDTH" default="30.0"/>
            <visualProperty name="NODE_CUSTOMGRAPHICS_POSITION_8" default="C,C,c,0.00,0.00"/>
            <visualProperty name="NODE_CUSTOMGRAPHICS_1" default="org.cytoscape.ding.customgraphics.NullCustomGraphics,0,[ Remove Graphics ],"/>
            <visualProperty name="NODE_LABEL_FONT_SIZE" default="24"/>
            <visualProperty name="NODE_Y_LOCATION" default="0.0"/>
            <visualProperty name="NODE_LABEL_FONT_FACE" default="SansSerif.plain,plain,12"/>
            <visualProperty name="NODE_CUSTOMPAINT_4" default="DefaultVisualizableVisualProperty(id=NODE_CUSTOMPAINT_4, name=Node Custom Paint 4)"/>
            <visualProperty name="NODE_CUSTOMPAINT_7" default="DefaultVisualizableVisualProperty(id=NODE_CUSTOMPAINT_7, name=Node Custom Paint 7)"/>
            <visualProperty name="NODE_CUSTOMGRAPHICS_5" default="org.cytoscape.ding.customgraphics.NullCustomGraphics,0,[ Remove Graphics ],"/>
            <visualProperty name="NODE_CUSTOMGRAPHICS_SIZE_2" default="50.0"/>
            <visualProperty name="NODE_BORDER_STROKE" default="SOLID"/>
            <visualProperty name="NODE_LABEL_TRANSPARENCY" default="255"/>
            <visualProperty name="NODE_TOOLTIP" default=""/>
            <visualProperty name="NODE_SELECTED_PAINT" default="#FF0066"/>
            <visualProperty name="NODE_FILL_COLOR" default="#FFFFFF"/>
            <visualProperty name="NODE_CUSTOMGRAPHICS_POSITION_1" default="C,C,c,0.00,0.00"/>
            <visualProperty name="NODE_CUSTOMGRAPHICS_POSITION_2" default="C,C,c,0.00,0.00"/>
            <visualProperty name="NODE_CUSTOMGRAPHICS_SIZE_3" default="50.0"/>
            <visualProperty name="NODE_BORDER_TRANSPARENCY" default="255"/>
            <visualProperty name="NODE_CUSTOMPAINT_2" default="DefaultVisualizableVisualProperty(id=NODE_CUSTOMPAINT_2, name=Node Custom Paint 2)"/>
            <visualProperty name="NODE_CUSTOMGRAPHICS_9" default="org.cytoscape.ding.customgraphics.NullCustomGraphics,0,[ Remove Graphics ],"/>
            <visualProperty name="NODE_CUSTOMGRAPHICS_SIZE_1" default="50.0"/>
            <visualProperty name="NODE_SELECTED" default="false"/>
            <visualProperty name="NODE_CUSTOMPAINT_8" default="DefaultVisualizableVisualProperty(id=NODE_CUSTOMPAINT_8, name=Node Custom Paint 8)"/>
            <visualProperty name="NODE_X_LOCATION" default="0.0"/>
            <visualProperty name="NODE_CUSTOMGRAPHICS_6" default="org.cytoscape.ding.customgraphics.NullCustomGraphics,0,[ Remove Graphics ],"/>
            <visualProperty name="NODE_SHAPE" default="ELLIPSE"/>
            <visualProperty name="NODE_HEIGHT" default="30.0"/>
            <visualProperty name="NODE_LABEL" default="">
                <passthroughMapping attributeType="string" attributeName="name"/>
            </visualProperty>
            <visualProperty name="NODE_CUSTOMGRAPHICS_2" default="org.cytoscape.ding.customgraphics.NullCustomGraphics,0,[ Remove Graphics ],"/>
            <visualProperty name="NODE_BORDER_WIDTH" default="0.0"/>
            <visualProperty name="NODE_CUSTOMGRAPHICS_POSITION_9" default="C,C,c,0.00,0.00"/>
            <visualProperty name="NODE_CUSTOMPAINT_3" default="DefaultVisualizableVisualProperty(id=NODE_CUSTOMPAINT_3, name=Node Custom Paint 3)"/>
            <visualProperty name="NODE_VISIBLE" default="true"/>
            <visualProperty name="NODE_CUSTOMPAINT_5" default="DefaultVisualizableVisualProperty(id=NODE_CUSTOMPAINT_5, name=Node Custom Paint 5)"/>
            <visualProperty name="NODE_CUSTOMPAINT_9" default="DefaultVisualizableVisualProperty(id=NODE_CUSTOMPAINT_9, name=Node Custom Paint 9)"/>
            <visualProperty name="NODE_DEPTH" default="0.0"/>
            <visualProperty name="COMPOUND_NODE_SHAPE" default="ROUND_RECTANGLE"/>
            <visualProperty name="NODE_LABEL_COLOR" default="#333333"/>
        </node>
        <edge>
            <dependency name="arrowColorMatchesEdge" value="false"/>
            <visualProperty name="EDGE_VISIBLE" default="true"/>
            <visualProperty name="EDGE_LABEL_COLOR" default="#000000"/>
            <visualProperty name="EDGE_STROKE_SELECTED_PAINT" default="#FF0000"/>
            <visualProperty name="EDGE_CURVED" default="true"/>
            <visualProperty name="EDGE_SELECTED" default="false"/>
            <visualProperty name="EDGE_LABEL" default=""/>
            <visualProperty name="EDGE_STROKE_UNSELECTED_PAINT" default="#B7B7B7"/>
            <visualProperty name="EDGE_LABEL_WIDTH" default="200.0"/>
            <visualProperty name="EDGE_TRANSPARENCY" default="255"/>
            <visualProperty name="EDGE_UNSELECTED_PAINT" default="#404040"/>
            <visualProperty name="EDGE_LABEL_FONT_FACE" default="SansSerif.plain,plain,10"/>
            <visualProperty name="EDGE_LINE_TYPE" default="SOLID"/>
            <visualProperty name="EDGE_SOURCE_ARROW_SELECTED_PAINT" default="#FFFF00"/>
            <visualProperty name="EDGE_LABEL_FONT_SIZE" default="10"/>
            <visualProperty name="EDGE_SOURCE_ARROW_UNSELECTED_PAINT" default="#000000"/>
            <visualProperty name="EDGE_TARGET_ARROW_SIZE" default="6.0"/>
            <visualProperty name="EDGE_WIDTH" default="1.0"/>
            <visualProperty name="EDGE_PAINT" default="#808080"/>
            <visualProperty name="EDGE_TARGET_ARROW_UNSELECTED_PAINT" default="#000000"/>
            <visualProperty name="EDGE_LABEL_TRANSPARENCY" default="255"/>
            <visualProperty name="EDGE_TOOLTIP" default=""/>
            <visualProperty name="EDGE_TARGET_ARROW_SHAPE" default="NONE"/>
            <visualProperty name="EDGE_SOURCE_ARROW_SIZE" default="6.0"/>
            <visualProperty name="EDGE_SELECTED_PAINT" default="#FF0000"/>
            <visualProperty name="EDGE_BEND" default=""/>
            <visualProperty name="EDGE_TARGET_ARROW_SELECTED_PAINT" default="#FFFF00"/>
            <visualProperty name="EDGE_SOURCE_ARROW_SHAPE" default="NONE"/>
        </edge>
    </visualStyle>
    <visualStyle name="Curved">
        <network>
            <visualProperty name="NETWORK_TITLE" default=""/>
            <visualProperty name="NETWORK_EDGE_SELECTION" default="true"/>
            <visualProperty name="NETWORK_BACKGROUND_PAINT" default="#DAD6CD"/>
            <visualProperty name="NETWORK_WIDTH" default="550.0"/>
            <visualProperty name="NETWORK_NODE_SELECTION" default="true"/>
            <visualProperty name="NETWORK_CENTER_Z_LOCATION" default="0.0"/>
            <visualProperty name="NETWORK_CENTER_X_LOCATION" default="0.0"/>
            <visualProperty name="NETWORK_SCALE_FACTOR" default="1.0"/>
            <visualProperty name="NETWORK_DEPTH" default="0.0"/>
            <visualProperty name="NETWORK_HEIGHT" default="400.0"/>
            <visualProperty name="NETWORK_CENTER_Y_LOCATION" default="0.0"/>
        </network>
        <node>
            <dependency name="nodeCustomGraphicsSizeSync" value="true"/>
            <dependency name="nodeSizeLocked" value="true"/>
            <visualProperty name="NODE_CUSTOMGRAPHICS_POSITION_5" default="C,C,c,0.00,0.00"/>
            <visualProperty name="NODE_CUSTOMGRAPHICS_POSITION_6" default="C,C,c,0.00,0.00"/>
            <visualProperty name="NODE_BORDER_PAINT" default="#FFFFFF"/>
            <visualProperty name="NODE_CUSTOMGRAPHICS_SIZE_5" default="0.0"/>
            <visualProperty name="NODE_CUSTOMGRAPHICS_SIZE_8" default="0.0"/>
            <visualProperty name="NODE_CUSTOMGRAPHICS_8" default="org.cytoscape.ding.customgraphics.NullCustomGraphics,0,[ Remove Graphics ],"/>
            <visualProperty name="NODE_CUSTOMGRAPHICS_SIZE_7" default="0.0"/>
            <visualProperty name="NODE_CUSTOMGRAPHICS_SIZE_6" default="0.0"/>
            <visualProperty name="NODE_LABEL_WIDTH" default="200.0"/>
            <visualProperty name="NODE_CUSTOMGRAPHICS_POSITION_7" default="C,C,c,0.00,0.00"/>
            <visualProperty name="NODE_CUSTOMGRAPHICS_SIZE_9" default="0.0"/>
            <visualProperty name="NODE_SIZE" default="18.0"/>
            <visualProperty name="NODE_CUSTOMGRAPHICS_SIZE_4" default="0.0"/>
            <visualProperty name="NODE_CUSTOMGRAPHICS_3" default="org.cytoscape.ding.customgraphics.NullCustomGraphics,0,[ Remove Graphics ],"/>
            <visualProperty name="NODE_LABEL_POSITION" default="SE,NW,c,-2.00,3.00"/>
            <visualProperty name="NODE_CUSTOMGRAPHICS_POSITION_4" default="C,C,c,0.00,0.00"/>
            <visualProperty name="NODE_CUSTOMGRAPHICS_7" default="org.cytoscape.ding.customgraphics.NullCustomGraphics,0,[ Remove Graphics ],"/>
            <visualProperty name="NODE_Z_LOCATION" default="0.0"/>
            <visualProperty name="NODE_CUSTOMGRAPHICS_4" default="org.cytoscape.ding.customgraphics.NullCustomGraphics,0,[ Remove Graphics ],"/>
            <visualProperty name="NODE_CUSTOMGRAPHICS_POSITION_3" default="C,C,c,0.00,0.00"/>
            <visualProperty name="NODE_NESTED_NETWORK_IMAGE_VISIBLE" default="true"/>
            <visualProperty name="NODE_TRANSPARENCY" default="255"/>
            <visualProperty name="COMPOUND_NODE_PADDING" default="10.0"/>
            <visualProperty name="NODE_WIDTH" default="60.0"/>
            <visualProperty name="NODE_CUSTOMGRAPHICS_POSITION_8" default="C,C,c,0.00,0.00"/>
            <visualProperty name="NODE_CUSTOMGRAPHICS_1" default="org.cytoscape.ding.customgraphics.NullCustomGraphics,0,[ Remove Graphics ],"/>
            <visualProperty name="NODE_LABEL_FONT_SIZE" default="14"/>
            <visualProperty name="NODE_Y_LOCATION" default="0.0"/>
            <visualProperty name="NODE_LABEL_FONT_FACE" default="SansSerif.plain,plain,12"/>
            <visualProperty name="NODE_CUSTOMGRAPHICS_5" default="org.cytoscape.ding.customgraphics.NullCustomGraphics,0,[ Remove Graphics ],"/>
            <visualProperty name="NODE_CUSTOMGRAPHICS_SIZE_2" default="0.0"/>
            <visualProperty name="NODE_BORDER_STROKE" default="SOLID"/>
            <visualProperty name="NODE_LABEL_TRANSPARENCY" default="255"/>
            <visualProperty name="NODE_TOOLTIP" default=""/>
            <visualProperty name="NODE_SELECTED_PAINT" default="#FFFF00"/>
            <visualProperty name="NODE_FILL_COLOR" default="#FEC44F"/>
            <visualProperty name="NODE_CUSTOMGRAPHICS_POSITION_1" default="C,C,c,0.00,0.00"/>
            <visualProperty name="NODE_CUSTOMGRAPHICS_POSITION_2" default="C,C,c,0.00,0.00"/>
            <visualProperty name="NODE_CUSTOMGRAPHICS_SIZE_3" default="0.0"/>
            <visualProperty name="NODE_BORDER_TRANSPARENCY" default="255"/>
            <visualProperty name="NODE_CUSTOMGRAPHICS_9" default="org.cytoscape.ding.customgraphics.NullCustomGraphics,0,[ Remove Graphics ],"/>
            <visualProperty name="NODE_CUSTOMGRAPHICS_SIZE_1" default="0.0"/>
            <visualProperty name="NODE_SELECTED" default="false"/>
            <visualProperty name="NODE_X_LOCATION" default="0.0"/>
            <visualProperty name="NODE_CUSTOMGRAPHICS_6" default="org.cytoscape.ding.customgraphics.NullCustomGraphics,0,[ Remove Graphics ],"/>
            <visualProperty name="NODE_SHAPE" default="ELLIPSE"/>
            <visualProperty name="NODE_HEIGHT" default="40.0"/>
            <visualProperty name="NODE_LABEL" default="">
                <passthroughMapping attributeType="string" attributeName="name"/>
            </visualProperty>
            <visualProperty name="NODE_CUSTOMGRAPHICS_2" default="org.cytoscape.ding.customgraphics.NullCustomGraphics,0,[ Remove Graphics ],"/>
            <visualProperty name="NODE_BORDER_WIDTH" default="7.0"/>
            <visualProperty name="NODE_CUSTOMGRAPHICS_POSITION_9" default="C,C,c,0.00,0.00"/>
            <visualProperty name="NODE_VISIBLE" default="true"/>
            <visualProperty name="NODE_DEPTH" default="0.0"/>
            <visualProperty name="COMPOUND_NODE_SHAPE" default="ROUND_RECTANGLE"/>
            <visualProperty name="NODE_LABEL_COLOR" default="#666666"/>
        </node>
        <edge>
            <dependency name="arrowColorMatchesEdge" value="true"/>
            <visualProperty name="EDGE_VISIBLE" default="true"/>
            <visualProperty name="EDGE_LABEL_COLOR" default="#000000"/>
            <visualProperty name="EDGE_STROKE_SELECTED_PAINT" default="#FF0000"/>
            <visualProperty name="EDGE_CURVED" default="true"/>
            <visualProperty name="EDGE_SELECTED" default="false"/>
            <visualProperty name="EDGE_LABEL" default=""/>
            <visualProperty name="EDGE_STROKE_UNSELECTED_PAINT" default="#FFFFFF"/>
            <visualProperty name="EDGE_LABEL_WIDTH" default="200.0"/>
            <visualProperty name="EDGE_TRANSPARENCY" default="255"/>
            <visualProperty name="EDGE_UNSELECTED_PAINT" default="#FFFFFF"/>
            <visualProperty name="EDGE_LABEL_FONT_FACE" default="SansSerif.plain,plain,10"/>
            <visualProperty name="EDGE_LINE_TYPE" default="SOLID"/>
            <visualProperty name="EDGE_SOURCE_ARROW_SELECTED_PAINT" default="#FFFF00"/>
            <visualProperty name="EDGE_LABEL_FONT_SIZE" default="10"/>
            <visualProperty name="EDGE_SOURCE_ARROW_UNSELECTED_PAINT" default="#000000"/>
            <visualProperty name="EDGE_TARGET_ARROW_SIZE" default="6.0"/>
            <visualProperty name="EDGE_WIDTH" default="3.0"/>
            <visualProperty name="EDGE_TARGET_ARROW_UNSELECTED_PAINT" default="#000000"/>
            <visualProperty name="EDGE_LABEL_TRANSPARENCY" default="255"/>
            <visualProperty name="EDGE_TOOLTIP" default=""/>
            <visualProperty name="EDGE_TARGET_ARROW_SHAPE" default="DELTA"/>
            <visualProperty name="EDGE_SOURCE_ARROW_SIZE" default="6.0"/>
            <visualProperty name="EDGE_BEND" default="0.728545744495502,-0.684997151948455,0.6456513365424503"/>
            <visualProperty name="EDGE_TARGET_ARROW_SELECTED_PAINT" default="#FFFF00"/>
            <visualProperty name="EDGE_SOURCE_ARROW_SHAPE" default="NONE"/>
        </edge>
    </visualStyle>
    <visualStyle name="default black">
        <network>
            <visualProperty name="NETWORK_TITLE" default=""/>
            <visualProperty name="NETWORK_EDGE_SELECTION" default="true"/>
            <visualProperty name="NETWORK_SIZE" default="550.0"/>
            <visualProperty name="NETWORK_BACKGROUND_PAINT" default="#000000"/>
            <visualProperty name="NETWORK_WIDTH" default="550.0"/>
            <visualProperty name="NETWORK_NODE_SELECTION" default="true"/>
            <visualProperty name="NETWORK_CENTER_Z_LOCATION" default="0.0"/>
            <visualProperty name="NETWORK_CENTER_X_LOCATION" default="0.0"/>
            <visualProperty name="NETWORK_SCALE_FACTOR" default="1.0"/>
            <visualProperty name="NETWORK_DEPTH" default="0.0"/>
            <visualProperty name="NETWORK_HEIGHT" default="400.0"/>
            <visualProperty name="NETWORK_CENTER_Y_LOCATION" default="0.0"/>
        </network>
        <node>
            <dependency name="nodeCustomGraphicsSizeSync" value="true"/>
            <dependency name="nodeSizeLocked" value="true"/>
            <visualProperty name="NODE_CUSTOMGRAPHICS_POSITION_5" default="C,C,c,0.00,0.00"/>
            <visualProperty name="NODE_CUSTOMGRAPHICS_POSITION_6" default="C,C,c,0.00,0.00"/>
            <visualProperty name="NODE_CUSTOMPAINT_1" default="DefaultVisualizableVisualProperty(id=NODE_CUSTOMPAINT_1, name=Node Custom Paint 1)"/>
            <visualProperty name="NODE_BORDER_PAINT" default="#009900"/>
            <visualProperty name="NODE_CUSTOMGRAPHICS_SIZE_5" default="50.0"/>
            <visualProperty name="NODE_CUSTOMGRAPHICS_SIZE_8" default="50.0"/>
            <visualProperty name="NODE_CUSTOMGRAPHICS_8" default="org.cytoscape.ding.customgraphics.NullCustomGraphics,0,[ Remove Graphics ],"/>
            <visualProperty name="NODE_CUSTOMGRAPHICS_SIZE_7" default="50.0"/>
            <visualProperty name="NODE_CUSTOMPAINT_6" default="DefaultVisualizableVisualProperty(id=NODE_CUSTOMPAINT_6, name=Node Custom Paint 6)"/>
            <visualProperty name="NODE_CUSTOMGRAPHICS_SIZE_6" default="50.0"/>
            <visualProperty name="NODE_LABEL_WIDTH" default="200.0"/>
            <visualProperty name="NODE_CUSTOMGRAPHICS_POSITION_7" default="C,C,c,0.00,0.00"/>
            <visualProperty name="NODE_CUSTOMGRAPHICS_SIZE_9" default="50.0"/>
            <visualProperty name="NODE_SIZE" default="15.0"/>
            <visualProperty name="NODE_PAINT" default="#1E90FF"/>
            <visualProperty name="NODE_CUSTOMGRAPHICS_SIZE_4" default="50.0"/>
            <visualProperty name="NODE_CUSTOMGRAPHICS_3" default="org.cytoscape.ding.customgraphics.NullCustomGraphics,0,[ Remove Graphics ],"/>
            <visualProperty name="NODE_LABEL_POSITION" default="S,NW,c,0.00,0.00"/>
            <visualProperty name="NODE_CUSTOMGRAPHICS_POSITION_4" default="C,C,c,0.00,0.00"/>
            <visualProperty name="NODE_CUSTOMGRAPHICS_7" default="org.cytoscape.ding.customgraphics.NullCustomGraphics,0,[ Remove Graphics ],"/>
            <visualProperty name="NODE_Z_LOCATION" default="0.0"/>
            <visualProperty name="NODE_CUSTOMGRAPHICS_4" default="org.cytoscape.ding.customgraphics.NullCustomGraphics,0,[ Remove Graphics ],"/>
            <visualProperty name="NODE_CUSTOMGRAPHICS_POSITION_3" default="C,C,c,0.00,0.00"/>
            <visualProperty name="NODE_NESTED_NETWORK_IMAGE_VISIBLE" default="true"/>
            <visualProperty name="NODE_TRANSPARENCY" default="255"/>
            <visualProperty name="COMPOUND_NODE_PADDING" default="10.0"/>
            <visualProperty name="NODE_WIDTH" default="70.0"/>
            <visualProperty name="NODE_CUSTOMGRAPHICS_POSITION_8" default="C,C,c,0.00,0.00"/>
            <visualProperty name="NODE_CUSTOMGRAPHICS_1" default="org.cytoscape.ding.customgraphics.NullCustomGraphics,0,[ Remove Graphics ],"/>
            <visualProperty name="NODE_LABEL_FONT_SIZE" default="12"/>
            <visualProperty name="NODE_Y_LOCATION" default="0.0"/>
            <visualProperty name="NODE_LABEL_FONT_FACE" default="SansSerif.plain,plain,12"/>
            <visualProperty name="NODE_CUSTOMPAINT_4" default="DefaultVisualizableVisualProperty(id=NODE_CUSTOMPAINT_4, name=Node Custom Paint 4)"/>
            <visualProperty name="NODE_CUSTOMPAINT_7" default="DefaultVisualizableVisualProperty(id=NODE_CUSTOMPAINT_7, name=Node Custom Paint 7)"/>
            <visualProperty name="NODE_CUSTOMGRAPHICS_5" default="org.cytoscape.ding.customgraphics.NullCustomGraphics,0,[ Remove Graphics ],"/>
            <visualProperty name="NODE_CUSTOMGRAPHICS_SIZE_2" default="50.0"/>
            <visualProperty name="NODE_BORDER_STROKE" default="SOLID"/>
            <visualProperty name="NODE_LABEL_TRANSPARENCY" default="255"/>
            <visualProperty name="NODE_TOOLTIP" default=""/>
            <visualProperty name="NODE_SELECTED_PAINT" default="#FFFF00"/>
            <visualProperty name="NODE_FILL_COLOR" default="#FFFFFF"/>
            <visualProperty name="NODE_CUSTOMGRAPHICS_POSITION_1" default="C,C,c,0.00,0.00"/>
            <visualProperty name="NODE_CUSTOMGRAPHICS_POSITION_2" default="C,C,c,0.00,0.00"/>
            <visualProperty name="NODE_CUSTOMGRAPHICS_SIZE_3" default="50.0"/>
            <visualProperty name="NODE_BORDER_TRANSPARENCY" default="255"/>
            <visualProperty name="NODE_CUSTOMPAINT_2" default="DefaultVisualizableVisualProperty(id=NODE_CUSTOMPAINT_2, name=Node Custom Paint 2)"/>
            <visualProperty name="NODE_CUSTOMGRAPHICS_9" default="org.cytoscape.ding.customgraphics.NullCustomGraphics,0,[ Remove Graphics ],"/>
            <visualProperty name="NODE_CUSTOMGRAPHICS_SIZE_1" default="50.0"/>
            <visualProperty name="NODE_SELECTED" default="false"/>
            <visualProperty name="NODE_CUSTOMPAINT_8" default="DefaultVisualizableVisualProperty(id=NODE_CUSTOMPAINT_8, name=Node Custom Paint 8)"/>
            <visualProperty name="NODE_X_LOCATION" default="0.0"/>
            <visualProperty name="NODE_CUSTOMGRAPHICS_6" default="org.cytoscape.ding.customgraphics.NullCustomGraphics,0,[ Remove Graphics ],"/>
            <visualProperty name="NODE_SHAPE" default="ELLIPSE"/>
            <visualProperty name="NODE_HEIGHT" default="30.0"/>
            <visualProperty name="NODE_LABEL" default="">
                <passthroughMapping attributeType="string" attributeName="name"/>
            </visualProperty>
            <visualProperty name="NODE_CUSTOMGRAPHICS_2" default="org.cytoscape.ding.customgraphics.NullCustomGraphics,0,[ Remove Graphics ],"/>
            <visualProperty name="NODE_BORDER_WIDTH" default="0.0"/>
            <visualProperty name="NODE_CUSTOMGRAPHICS_POSITION_9" default="C,C,c,0.00,0.00"/>
            <visualProperty name="NODE_CUSTOMPAINT_3" default="DefaultVisualizableVisualProperty(id=NODE_CUSTOMPAINT_3, name=Node Custom Paint 3)"/>
            <visualProperty name="NODE_VISIBLE" default="true"/>
            <visualProperty name="NODE_CUSTOMPAINT_5" default="DefaultVisualizableVisualProperty(id=NODE_CUSTOMPAINT_5, name=Node Custom Paint 5)"/>
            <visualProperty name="NODE_CUSTOMPAINT_9" default="DefaultVisualizableVisualProperty(id=NODE_CUSTOMPAINT_9, name=Node Custom Paint 9)"/>
            <visualProperty name="NODE_DEPTH" default="0.0"/>
            <visualProperty name="COMPOUND_NODE_SHAPE" default="ROUND_RECTANGLE"/>
            <visualProperty name="NODE_LABEL_COLOR" default="#CCCCCC"/>
        </node>
        <edge>
            <dependency name="arrowColorMatchesEdge" value="false"/>
            <visualProperty name="EDGE_VISIBLE" default="true"/>
            <visualProperty name="EDGE_LABEL_COLOR" default="#000000"/>
            <visualProperty name="EDGE_STROKE_SELECTED_PAINT" default="#FF0000"/>
            <visualProperty name="EDGE_CURVED" default="true"/>
            <visualProperty name="EDGE_SELECTED" default="false"/>
            <visualProperty name="EDGE_LABEL" default=""/>
            <visualProperty name="EDGE_STROKE_UNSELECTED_PAINT" default="#009900"/>
            <visualProperty name="EDGE_LABEL_WIDTH" default="200.0"/>
            <visualProperty name="EDGE_TRANSPARENCY" default="255"/>
            <visualProperty name="EDGE_UNSELECTED_PAINT" default="#404040"/>
            <visualProperty name="EDGE_LABEL_FONT_FACE" default="Dialog.plain,plain,10"/>
            <visualProperty name="EDGE_LINE_TYPE" default="SOLID"/>
            <visualProperty name="EDGE_SOURCE_ARROW_SELECTED_PAINT" default="#FFFF00"/>
            <visualProperty name="EDGE_LABEL_FONT_SIZE" default="10"/>
            <visualProperty name="EDGE_SOURCE_ARROW_UNSELECTED_PAINT" default="#000000"/>
            <visualProperty name="EDGE_TARGET_ARROW_SIZE" default="6.0"/>
            <visualProperty name="EDGE_WIDTH" default="2.0"/>
            <visualProperty name="EDGE_PAINT" default="#323232"/>
            <visualProperty name="EDGE_TARGET_ARROW_UNSELECTED_PAINT" default="#000000"/>
            <visualProperty name="EDGE_LABEL_TRANSPARENCY" default="255"/>
            <visualProperty name="EDGE_TOOLTIP" default=""/>
            <visualProperty name="EDGE_TARGET_ARROW_SHAPE" default="NONE"/>
            <visualProperty name="EDGE_SOURCE_ARROW_SIZE" default="6.0"/>
            <visualProperty name="EDGE_SELECTED_PAINT" default="#FF0000"/>
            <visualProperty name="EDGE_BEND" default=""/>
            <visualProperty name="EDGE_TARGET_ARROW_SELECTED_PAINT" default="#FFFF00"/>
            <visualProperty name="EDGE_SOURCE_ARROW_SHAPE" default="NONE"/>
        </edge>
    </visualStyle>
    <visualStyle name="Solid">
        <network>
            <visualProperty name="NETWORK_TITLE" default=""/>
            <visualProperty name="NETWORK_EDGE_SELECTION" default="true"/>
            <visualProperty name="NETWORK_SIZE" default="550.0"/>
            <visualProperty name="NETWORK_BACKGROUND_PAINT" default="#FFFFFF"/>
            <visualProperty name="NETWORK_WIDTH" default="550.0"/>
            <visualProperty name="NETWORK_NODE_SELECTION" default="true"/>
            <visualProperty name="NETWORK_CENTER_Z_LOCATION" default="0.0"/>
            <visualProperty name="NETWORK_CENTER_X_LOCATION" default="0.0"/>
            <visualProperty name="NETWORK_SCALE_FACTOR" default="1.0"/>
            <visualProperty name="NETWORK_DEPTH" default="0.0"/>
            <visualProperty name="NETWORK_HEIGHT" default="400.0"/>
            <visualProperty name="NETWORK_CENTER_Y_LOCATION" default="0.0"/>
        </network>
        <node>
            <dependency name="nodeCustomGraphicsSizeSync" value="true"/>
            <dependency name="nodeSizeLocked" value="true"/>
            <visualProperty name="NODE_CUSTOMGRAPHICS_POSITION_5" default="C,C,c,0.00,0.00"/>
            <visualProperty name="NODE_CUSTOMGRAPHICS_POSITION_6" default="C,C,c,0.00,0.00"/>
            <visualProperty name="NODE_CUSTOMPAINT_1" default="DefaultVisualizableVisualProperty(id=NODE_CUSTOMPAINT_1, name=Node Custom Paint 1)"/>
            <visualProperty name="NODE_BORDER_PAINT" default="#000000"/>
            <visualProperty name="NODE_CUSTOMGRAPHICS_SIZE_5" default="50.0"/>
            <visualProperty name="NODE_CUSTOMGRAPHICS_SIZE_8" default="50.0"/>
            <visualProperty name="NODE_CUSTOMGRAPHICS_8" default="org.cytoscape.ding.customgraphics.NullCustomGraphics,0,[ Remove Graphics ],"/>
            <visualProperty name="NODE_CUSTOMGRAPHICS_SIZE_7" default="50.0"/>
            <visualProperty name="NODE_CUSTOMPAINT_6" default="DefaultVisualizableVisualProperty(id=NODE_CUSTOMPAINT_6, name=Node Custom Paint 6)"/>
            <visualProperty name="NODE_CUSTOMGRAPHICS_SIZE_6" default="50.0"/>
            <visualProperty name="NODE_LABEL_WIDTH" default="200.0"/>
            <visualProperty name="NODE_CUSTOMGRAPHICS_POSITION_7" default="C,C,c,0.00,0.00"/>
            <visualProperty name="NODE_CUSTOMGRAPHICS_SIZE_9" default="50.0"/>
            <visualProperty name="NODE_SIZE" default="40.0"/>
            <visualProperty name="NODE_PAINT" default="#787878"/>
            <visualProperty name="NODE_CUSTOMGRAPHICS_SIZE_4" default="50.0"/>
            <visualProperty name="NODE_CUSTOMGRAPHICS_3" default="org.cytoscape.ding.customgraphics.NullCustomGraphics,0,[ Remove Graphics ],"/>
            <visualProperty name="NODE_LABEL_POSITION" default="C,C,c,0.00,0.00"/>
            <visualProperty name="NODE_CUSTOMGRAPHICS_POSITION_4" default="C,C,c,0.00,0.00"/>
            <visualProperty name="NODE_CUSTOMGRAPHICS_7" default="org.cytoscape.ding.customgraphics.NullCustomGraphics,0,[ Remove Graphics ],"/>
            <visualProperty name="NODE_Z_LOCATION" default="0.0"/>
            <visualProperty name="NODE_CUSTOMGRAPHICS_4" default="org.cytoscape.ding.customgraphics.NullCustomGraphics,0,[ Remove Graphics ],"/>
            <visualProperty name="NODE_CUSTOMGRAPHICS_POSITION_3" default="C,C,c,0.00,0.00"/>
            <visualProperty name="NODE_NESTED_NETWORK_IMAGE_VISIBLE" default="true"/>
            <visualProperty name="NODE_TRANSPARENCY" default="255"/>
            <visualProperty name="COMPOUND_NODE_PADDING" default="10.0"/>
            <visualProperty name="NODE_WIDTH" default="70.0"/>
            <visualProperty name="NODE_CUSTOMGRAPHICS_POSITION_8" default="C,C,c,0.00,0.00"/>
            <visualProperty name="NODE_CUSTOMGRAPHICS_1" default="org.cytoscape.ding.customgraphics.NullCustomGraphics,0,[ Remove Graphics ],"/>
            <visualProperty name="NODE_LABEL_FONT_SIZE" default="14"/>
            <visualProperty name="NODE_Y_LOCATION" default="0.0"/>
            <visualProperty name="NODE_LABEL_FONT_FACE" default="Dialog.plain,plain,12"/>
            <visualProperty name="NODE_CUSTOMPAINT_4" default="DefaultVisualizableVisualProperty(id=NODE_CUSTOMPAINT_4, name=Node Custom Paint 4)"/>
            <visualProperty name="NODE_CUSTOMPAINT_7" default="DefaultVisualizableVisualProperty(id=NODE_CUSTOMPAINT_7, name=Node Custom Paint 7)"/>
            <visualProperty name="NODE_CUSTOMGRAPHICS_5" default="org.cytoscape.ding.customgraphics.NullCustomGraphics,0,[ Remove Graphics ],"/>
            <visualProperty name="NODE_CUSTOMGRAPHICS_SIZE_2" default="50.0"/>
            <visualProperty name="NODE_BORDER_STROKE" default="SOLID"/>
            <visualProperty name="NODE_LABEL_TRANSPARENCY" default="255"/>
            <visualProperty name="NODE_TOOLTIP" default=""/>
            <visualProperty name="NODE_SELECTED_PAINT" default="#FFFF00"/>
            <visualProperty name="NODE_FILL_COLOR" default="#666666"/>
            <visualProperty name="NODE_CUSTOMGRAPHICS_POSITION_1" default="C,C,c,0.00,0.00"/>
            <visualProperty name="NODE_CUSTOMGRAPHICS_POSITION_2" default="C,C,c,0.00,0.00"/>
            <visualProperty name="NODE_CUSTOMGRAPHICS_SIZE_3" default="50.0"/>
            <visualProperty name="NODE_BORDER_TRANSPARENCY" default="255"/>
            <visualProperty name="NODE_CUSTOMPAINT_2" default="DefaultVisualizableVisualProperty(id=NODE_CUSTOMPAINT_2, name=Node Custom Paint 2)"/>
            <visualProperty name="NODE_CUSTOMGRAPHICS_9" default="org.cytoscape.ding.customgraphics.NullCustomGraphics,0,[ Remove Graphics ],"/>
            <visualProperty name="NODE_CUSTOMGRAPHICS_SIZE_1" default="50.0"/>
            <visualProperty name="NODE_SELECTED" default="false"/>
            <visualProperty name="NODE_CUSTOMPAINT_8" default="DefaultVisualizableVisualProperty(id=NODE_CUSTOMPAINT_8, name=Node Custom Paint 8)"/>
            <visualProperty name="NODE_X_LOCATION" default="0.0"/>
            <visualProperty name="NODE_CUSTOMGRAPHICS_6" default="org.cytoscape.ding.customgraphics.NullCustomGraphics,0,[ Remove Graphics ],"/>
            <visualProperty name="NODE_SHAPE" default="ELLIPSE"/>
            <visualProperty name="NODE_HEIGHT" default="70.0"/>
            <visualProperty name="NODE_LABEL" default="">
                <passthroughMapping attributeType="string" attributeName="name"/>
            </visualProperty>
            <visualProperty name="NODE_CUSTOMGRAPHICS_2" default="org.cytoscape.ding.customgraphics.NullCustomGraphics,0,[ Remove Graphics ],"/>
            <visualProperty name="NODE_BORDER_WIDTH" default="0.0"/>
            <visualProperty name="NODE_CUSTOMGRAPHICS_POSITION_9" default="C,C,c,0.00,0.00"/>
            <visualProperty name="NODE_CUSTOMPAINT_3" default="DefaultVisualizableVisualProperty(id=NODE_CUSTOMPAINT_3, name=Node Custom Paint 3)"/>
            <visualProperty name="NODE_VISIBLE" default="true"/>
            <visualProperty name="NODE_CUSTOMPAINT_5" default="DefaultVisualizableVisualProperty(id=NODE_CUSTOMPAINT_5, name=Node Custom Paint 5)"/>
            <visualProperty name="NODE_CUSTOMPAINT_9" default="DefaultVisualizableVisualProperty(id=NODE_CUSTOMPAINT_9, name=Node Custom Paint 9)"/>
            <visualProperty name="NODE_DEPTH" default="0.0"/>
            <visualProperty name="COMPOUND_NODE_SHAPE" default="ROUND_RECTANGLE"/>
            <visualProperty name="NODE_LABEL_COLOR" default="#000000"/>
        </node>
        <edge>
            <dependency name="arrowColorMatchesEdge" value="false"/>
            <visualProperty name="EDGE_VISIBLE" default="true"/>
            <visualProperty name="EDGE_LABEL_COLOR" default="#000000"/>
            <visualProperty name="EDGE_STROKE_SELECTED_PAINT" default="#FF0000"/>
            <visualProperty name="EDGE_CURVED" default="true"/>
            <visualProperty name="EDGE_SELECTED" default="false"/>
            <visualProperty name="EDGE_LABEL" default="">
                <passthroughMapping attributeType="string" attributeName="interaction"/>
            </visualProperty>
            <visualProperty name="EDGE_STROKE_UNSELECTED_PAINT" default="#CCCCCC"/>
            <visualProperty name="EDGE_LABEL_WIDTH" default="200.0"/>
            <visualProperty name="EDGE_TRANSPARENCY" default="255"/>
            <visualProperty name="EDGE_UNSELECTED_PAINT" default="#404040"/>
            <visualProperty name="EDGE_LABEL_FONT_FACE" default="Dialog.plain,plain,10"/>
            <visualProperty name="EDGE_LINE_TYPE" default="SOLID"/>
            <visualProperty name="EDGE_SOURCE_ARROW_SELECTED_PAINT" default="#FFFF00"/>
            <visualProperty name="EDGE_LABEL_FONT_SIZE" default="10"/>
            <visualProperty name="EDGE_SOURCE_ARROW_UNSELECTED_PAINT" default="#000000"/>
            <visualProperty name="EDGE_TARGET_ARROW_SIZE" default="6.0"/>
            <visualProperty name="EDGE_WIDTH" default="12.0"/>
            <visualProperty name="EDGE_PAINT" default="#323232"/>
            <visualProperty name="EDGE_TARGET_ARROW_UNSELECTED_PAINT" default="#000000"/>
            <visualProperty name="EDGE_LABEL_TRANSPARENCY" default="255"/>
            <visualProperty name="EDGE_TOOLTIP" default=""/>
            <visualProperty name="EDGE_TARGET_ARROW_SHAPE" default="NONE"/>
            <visualProperty name="EDGE_SOURCE_ARROW_SIZE" default="6.0"/>
            <visualProperty name="EDGE_SELECTED_PAINT" default="#FF0000"/>
            <visualProperty name="EDGE_BEND" default=""/>
            <visualProperty name="EDGE_TARGET_ARROW_SELECTED_PAINT" default="#FFFF00"/>
            <visualProperty name="EDGE_SOURCE_ARROW_SHAPE" default="NONE"/>
        </edge>
    </visualStyle>
    <visualStyle name="size_rank_0">
        <network>
            <visualProperty name="NETWORK_TITLE" default=""/>
            <visualProperty name="NETWORK_EDGE_SELECTION" default="true"/>
            <visualProperty name="NETWORK_SIZE" default="550.0"/>
            <visualProperty name="NETWORK_BACKGROUND_PAINT" default="#EBEBEB"/>
            <visualProperty name="NETWORK_WIDTH" default="550.0"/>
            <visualProperty name="NETWORK_NODE_SELECTION" default="true"/>
            <visualProperty name="NETWORK_CENTER_Z_LOCATION" default="0.0"/>
            <visualProperty name="NETWORK_CENTER_X_LOCATION" default="0.0"/>
            <visualProperty name="NETWORK_SCALE_FACTOR" default="1.0"/>
            <visualProperty name="NETWORK_DEPTH" default="0.0"/>
            <visualProperty name="NETWORK_HEIGHT" default="400.0"/>
            <visualProperty name="NETWORK_CENTER_Y_LOCATION" default="0.0"/>
        </network>
        <node>
            <dependency name="nodeCustomGraphicsSizeSync" value="true"/>
            <dependency name="nodeSizeLocked" value="true"/>
            <visualProperty name="NODE_CUSTOMGRAPHICS_POSITION_5" default="C,C,c,0.00,0.00"/>
            <visualProperty name="NODE_CUSTOMGRAPHICS_POSITION_6" default="C,C,c,0.00,0.00"/>
            <visualProperty name="NODE_CUSTOMPAINT_1" default="DefaultVisualizableVisualProperty(id=NODE_CUSTOMPAINT_1, name=Node Custom Paint 1)"/>
            <visualProperty name="NODE_BORDER_PAINT" default="#000000"/>
            <visualProperty name="NODE_CUSTOMGRAPHICS_SIZE_5" default="50.0"/>
            <visualProperty name="NODE_CUSTOMGRAPHICS_SIZE_8" default="50.0"/>
            <visualProperty name="NODE_CUSTOMGRAPHICS_8" default="org.cytoscape.ding.customgraphics.NullCustomGraphics,0,[ Remove Graphics ],"/>
            <visualProperty name="NODE_CUSTOMGRAPHICS_SIZE_7" default="50.0"/>
            <visualProperty name="NODE_CUSTOMPAINT_6" default="DefaultVisualizableVisualProperty(id=NODE_CUSTOMPAINT_6, name=Node Custom Paint 6)"/>
            <visualProperty name="NODE_CUSTOMGRAPHICS_SIZE_6" default="50.0"/>
            <visualProperty name="NODE_LABEL_WIDTH" default="200.0"/>
            <visualProperty name="NODE_CUSTOMGRAPHICS_POSITION_7" default="C,C,c,0.00,0.00"/>
            <visualProperty name="NODE_CUSTOMGRAPHICS_SIZE_9" default="50.0"/>
            <visualProperty name="NODE_SIZE" default="12.0">
                <continuousMapping attributeType="float" attributeName="diffusion_output__rank">
                    <continuousMappingPoint lesserValue="1.0" greaterValue="39.11245096536507" equalValue="39.11245096536507" attrValue="0.0"/>
                    <continuousMappingPoint lesserValue="13.821692732043733" greaterValue="1.0" equalValue="13.821692732043733" attrValue="99.0"/>
                </continuousMapping>
            </visualProperty>
            <visualProperty name="NODE_PAINT" default="#787878"/>
            <visualProperty name="NODE_CUSTOMGRAPHICS_SIZE_4" default="50.0"/>
            <visualProperty name="NODE_CUSTOMGRAPHICS_3" default="org.cytoscape.ding.customgraphics.NullCustomGraphics,0,[ Remove Graphics ],"/>
            <visualProperty name="NODE_LABEL_POSITION" default="C,C,c,0.00,0.00"/>
            <visualProperty name="NODE_CUSTOMGRAPHICS_POSITION_4" default="C,C,c,0.00,0.00"/>
            <visualProperty name="NODE_CUSTOMGRAPHICS_7" default="org.cytoscape.ding.customgraphics.NullCustomGraphics,0,[ Remove Graphics ],"/>
            <visualProperty name="NODE_Z_LOCATION" default="0.0"/>
            <visualProperty name="NODE_CUSTOMGRAPHICS_4" default="org.cytoscape.ding.customgraphics.NullCustomGraphics,0,[ Remove Graphics ],"/>
            <visualProperty name="NODE_CUSTOMGRAPHICS_POSITION_3" default="C,C,c,0.00,0.00"/>
            <visualProperty name="NODE_NESTED_NETWORK_IMAGE_VISIBLE" default="true"/>
            <visualProperty name="NODE_TRANSPARENCY" default="255"/>
            <visualProperty name="COMPOUND_NODE_PADDING" default="10.0"/>
            <visualProperty name="NODE_WIDTH" default="50.0"/>
            <visualProperty name="NODE_CUSTOMGRAPHICS_POSITION_8" default="C,C,c,0.00,0.00"/>
            <visualProperty name="NODE_CUSTOMGRAPHICS_1" default="org.cytoscape.ding.customgraphics.NullCustomGraphics,0,[ Remove Graphics ],"/>
            <visualProperty name="NODE_LABEL_FONT_SIZE" default="9"/>
            <visualProperty name="NODE_Y_LOCATION" default="0.0"/>
            <visualProperty name="NODE_LABEL_FONT_FACE" default="SansSerif.plain,plain,12"/>
            <visualProperty name="NODE_CUSTOMPAINT_4" default="DefaultVisualizableVisualProperty(id=NODE_CUSTOMPAINT_4, name=Node Custom Paint 4)"/>
            <visualProperty name="NODE_CUSTOMPAINT_7" default="DefaultVisualizableVisualProperty(id=NODE_CUSTOMPAINT_7, name=Node Custom Paint 7)"/>
            <visualProperty name="NODE_CUSTOMGRAPHICS_5" default="org.cytoscape.ding.customgraphics.NullCustomGraphics,0,[ Remove Graphics ],"/>
            <visualProperty name="NODE_CUSTOMGRAPHICS_SIZE_2" default="50.0"/>
            <visualProperty name="NODE_BORDER_STROKE" default="SOLID"/>
            <visualProperty name="NODE_LABEL_TRANSPARENCY" default="255"/>
            <visualProperty name="NODE_TOOLTIP" default=""/>
            <visualProperty name="NODE_SELECTED_PAINT" default="#FFFF00"/>
            <visualProperty name="NODE_FILL_COLOR" default="#CCCCFF"/>
            <visualProperty name="NODE_CUSTOMGRAPHICS_POSITION_1" default="C,C,c,0.00,0.00"/>
            <visualProperty name="NODE_CUSTOMGRAPHICS_POSITION_2" default="C,C,c,0.00,0.00"/>
            <visualProperty name="NODE_CUSTOMGRAPHICS_SIZE_3" default="50.0"/>
            <visualProperty name="NODE_BORDER_TRANSPARENCY" default="255"/>
            <visualProperty name="NODE_CUSTOMPAINT_2" default="DefaultVisualizableVisualProperty(id=NODE_CUSTOMPAINT_2, name=Node Custom Paint 2)"/>
            <visualProperty name="NODE_CUSTOMGRAPHICS_9" default="org.cytoscape.ding.customgraphics.NullCustomGraphics,0,[ Remove Graphics ],"/>
            <visualProperty name="NODE_CUSTOMGRAPHICS_SIZE_1" default="50.0"/>
            <visualProperty name="NODE_SELECTED" default="false"/>
            <visualProperty name="NODE_CUSTOMPAINT_8" default="DefaultVisualizableVisualProperty(id=NODE_CUSTOMPAINT_8, name=Node Custom Paint 8)"/>
            <visualProperty name="NODE_X_LOCATION" default="0.0"/>
            <visualProperty name="NODE_CUSTOMGRAPHICS_6" default="org.cytoscape.ding.customgraphics.NullCustomGraphics,0,[ Remove Graphics ],"/>
            <visualProperty name="NODE_SHAPE" default="RECTANGLE"/>
            <visualProperty name="NODE_HEIGHT" default="50.0"/>
            <visualProperty name="NODE_LABEL" default="">
                <passthroughMapping attributeType="string" attributeName="name"/>
            </visualProperty>
            <visualProperty name="NODE_CUSTOMGRAPHICS_2" default="org.cytoscape.ding.customgraphics.NullCustomGraphics,0,[ Remove Graphics ],"/>
            <visualProperty name="NODE_BORDER_WIDTH" default="0.0"/>
            <visualProperty name="NODE_CUSTOMGRAPHICS_POSITION_9" default="C,C,c,0.00,0.00"/>
            <visualProperty name="NODE_CUSTOMPAINT_3" default="DefaultVisualizableVisualProperty(id=NODE_CUSTOMPAINT_3, name=Node Custom Paint 3)"/>
            <visualProperty name="NODE_VISIBLE" default="true"/>
            <visualProperty name="NODE_CUSTOMPAINT_5" default="DefaultVisualizableVisualProperty(id=NODE_CUSTOMPAINT_5, name=Node Custom Paint 5)"/>
            <visualProperty name="NODE_CUSTOMPAINT_9" default="DefaultVisualizableVisualProperty(id=NODE_CUSTOMPAINT_9, name=Node Custom Paint 9)"/>
            <visualProperty name="NODE_DEPTH" default="0.0"/>
            <visualProperty name="COMPOUND_NODE_SHAPE" default="ROUND_RECTANGLE"/>
            <visualProperty name="NODE_LABEL_COLOR" default="#333333"/>
        </node>
        <edge>
            <dependency name="arrowColorMatchesEdge" value="false"/>
            <visualProperty name="EDGE_VISIBLE" default="true"/>
            <visualProperty name="EDGE_LABEL_COLOR" default="#000000"/>
            <visualProperty name="EDGE_STROKE_SELECTED_PAINT" default="#FF0000"/>
            <visualProperty name="EDGE_CURVED" default="true"/>
            <visualProperty name="EDGE_SELECTED" default="false"/>
            <visualProperty name="EDGE_LABEL" default=""/>
            <visualProperty name="EDGE_STROKE_UNSELECTED_PAINT" default="#4C4C4C"/>
            <visualProperty name="EDGE_LABEL_WIDTH" default="200.0"/>
            <visualProperty name="EDGE_TRANSPARENCY" default="255"/>
            <visualProperty name="EDGE_UNSELECTED_PAINT" default="#404040"/>
            <visualProperty name="EDGE_LABEL_FONT_FACE" default="SansSerif.plain,plain,10"/>
            <visualProperty name="EDGE_LINE_TYPE" default="SOLID"/>
            <visualProperty name="EDGE_SOURCE_ARROW_SELECTED_PAINT" default="#FFFF00"/>
            <visualProperty name="EDGE_LABEL_FONT_SIZE" default="10"/>
            <visualProperty name="EDGE_SOURCE_ARROW_UNSELECTED_PAINT" default="#000000"/>
            <visualProperty name="EDGE_TARGET_ARROW_SIZE" default="6.0"/>
            <visualProperty name="EDGE_WIDTH" default="2.0"/>
            <visualProperty name="EDGE_PAINT" default="#808080"/>
            <visualProperty name="EDGE_TARGET_ARROW_UNSELECTED_PAINT" default="#000000"/>
            <visualProperty name="EDGE_LABEL_TRANSPARENCY" default="255"/>
            <visualProperty name="EDGE_TOOLTIP" default=""/>
            <visualProperty name="EDGE_TARGET_ARROW_SHAPE" default="NONE"/>
            <visualProperty name="EDGE_SOURCE_ARROW_SIZE" default="6.0"/>
            <visualProperty name="EDGE_SELECTED_PAINT" default="#FF0000"/>
            <visualProperty name="EDGE_BEND" default=""/>
            <visualProperty name="EDGE_TARGET_ARROW_SELECTED_PAINT" default="#FFFF00"/>
            <visualProperty name="EDGE_SOURCE_ARROW_SHAPE" default="NONE"/>
        </edge>
    </visualStyle>
    <visualStyle name="Gradient1">
        <network>
            <visualProperty name="NETWORK_TITLE" default=""/>
            <visualProperty name="NETWORK_EDGE_SELECTION" default="true"/>
            <visualProperty name="NETWORK_BACKGROUND_PAINT" default="#000000"/>
            <visualProperty name="NETWORK_WIDTH" default="550.0"/>
            <visualProperty name="NETWORK_NODE_SELECTION" default="true"/>
            <visualProperty name="NETWORK_CENTER_Z_LOCATION" default="0.0"/>
            <visualProperty name="NETWORK_CENTER_X_LOCATION" default="0.0"/>
            <visualProperty name="NETWORK_SCALE_FACTOR" default="1.0"/>
            <visualProperty name="NETWORK_DEPTH" default="0.0"/>
            <visualProperty name="NETWORK_HEIGHT" default="400.0"/>
            <visualProperty name="NETWORK_CENTER_Y_LOCATION" default="0.0"/>
        </network>
        <node>
            <dependency name="nodeCustomGraphicsSizeSync" value="true"/>
            <dependency name="nodeSizeLocked" value="true"/>
            <visualProperty name="NODE_CUSTOMGRAPHICS_POSITION_5" default="C,C,c,0.00,0.00"/>
            <visualProperty name="NODE_CUSTOMGRAPHICS_POSITION_6" default="C,C,c,0.00,0.00"/>
            <visualProperty name="NODE_BORDER_PAINT" default="#000000"/>
            <visualProperty name="NODE_CUSTOMGRAPHICS_SIZE_5" default="0.0"/>
            <visualProperty name="NODE_CUSTOMGRAPHICS_SIZE_8" default="0.0"/>
            <visualProperty name="NODE_CUSTOMGRAPHICS_8" default="org.cytoscape.ding.customgraphics.NullCustomGraphics,0,[ Remove Graphics ],"/>
            <visualProperty name="NODE_CUSTOMGRAPHICS_SIZE_7" default="0.0"/>
            <visualProperty name="NODE_CUSTOMGRAPHICS_SIZE_6" default="0.0"/>
            <visualProperty name="NODE_LABEL_WIDTH" default="200.0"/>
            <visualProperty name="NODE_CUSTOMGRAPHICS_POSITION_7" default="C,C,c,0.00,0.00"/>
            <visualProperty name="NODE_CUSTOMGRAPHICS_SIZE_9" default="0.0"/>
            <visualProperty name="NODE_SIZE" default="30.0"/>
            <visualProperty name="NODE_CUSTOMGRAPHICS_SIZE_4" default="0.0"/>
            <visualProperty name="NODE_CUSTOMGRAPHICS_3" default="org.cytoscape.ding.customgraphics.NullCustomGraphics,0,[ Remove Graphics ],"/>
            <visualProperty name="NODE_LABEL_POSITION" default="S,NW,c,0.00,3.00"/>
            <visualProperty name="NODE_CUSTOMGRAPHICS_POSITION_4" default="C,C,c,0.00,0.00"/>
            <visualProperty name="NODE_CUSTOMGRAPHICS_7" default="org.cytoscape.ding.customgraphics.NullCustomGraphics,0,[ Remove Graphics ],"/>
            <visualProperty name="NODE_Z_LOCATION" default="0.0"/>
            <visualProperty name="NODE_CUSTOMGRAPHICS_4" default="org.cytoscape.ding.customgraphics.NullCustomGraphics,0,[ Remove Graphics ],"/>
            <visualProperty name="NODE_CUSTOMGRAPHICS_POSITION_3" default="C,C,c,0.00,0.00"/>
            <visualProperty name="NODE_NESTED_NETWORK_IMAGE_VISIBLE" default="true"/>
            <visualProperty name="NODE_TRANSPARENCY" default="255"/>
            <visualProperty name="COMPOUND_NODE_PADDING" default="10.0"/>
            <visualProperty name="NODE_WIDTH" default="60.0"/>
            <visualProperty name="NODE_CUSTOMGRAPHICS_POSITION_8" default="C,C,c,0.00,0.00"/>
            <visualProperty name="NODE_CUSTOMGRAPHICS_1" default="org.cytoscape.RadialGradient:{&quot;cy_gradientFractions&quot;:[0.0,0.39688042,1.0],&quot;cy_gradientColors&quot;:[&quot;#FFFFFF&quot;,&quot;#666666&quot;,&quot;#000000&quot;],&quot;cy_center&quot;:{&quot;x&quot;:0.25,&quot;y&quot;:0.2619047619047619}}"/>
            <visualProperty name="NODE_LABEL_FONT_SIZE" default="8"/>
            <visualProperty name="NODE_Y_LOCATION" default="0.0"/>
            <visualProperty name="NODE_LABEL_FONT_FACE" default="SansSerif.plain,plain,12"/>
            <visualProperty name="NODE_CUSTOMGRAPHICS_5" default="org.cytoscape.ding.customgraphics.NullCustomGraphics,0,[ Remove Graphics ],"/>
            <visualProperty name="NODE_CUSTOMGRAPHICS_SIZE_2" default="0.0"/>
            <visualProperty name="NODE_BORDER_STROKE" default="SOLID"/>
            <visualProperty name="NODE_LABEL_TRANSPARENCY" default="255"/>
            <visualProperty name="NODE_TOOLTIP" default=""/>
            <visualProperty name="NODE_SELECTED_PAINT" default="#FFFF00"/>
            <visualProperty name="NODE_FILL_COLOR" default="#000000"/>
            <visualProperty name="NODE_CUSTOMGRAPHICS_POSITION_1" default="C,C,c,0.00,0.00"/>
            <visualProperty name="NODE_CUSTOMGRAPHICS_POSITION_2" default="C,C,c,0.00,0.00"/>
            <visualProperty name="NODE_CUSTOMGRAPHICS_SIZE_3" default="0.0"/>
            <visualProperty name="NODE_BORDER_TRANSPARENCY" default="255"/>
            <visualProperty name="NODE_CUSTOMGRAPHICS_9" default="org.cytoscape.ding.customgraphics.NullCustomGraphics,0,[ Remove Graphics ],"/>
            <visualProperty name="NODE_CUSTOMGRAPHICS_SIZE_1" default="0.0"/>
            <visualProperty name="NODE_SELECTED" default="false"/>
            <visualProperty name="NODE_X_LOCATION" default="0.0"/>
            <visualProperty name="NODE_CUSTOMGRAPHICS_6" default="org.cytoscape.ding.customgraphics.NullCustomGraphics,0,[ Remove Graphics ],"/>
            <visualProperty name="NODE_SHAPE" default="ELLIPSE"/>
            <visualProperty name="NODE_HEIGHT" default="40.0"/>
            <visualProperty name="NODE_LABEL" default="">
                <passthroughMapping attributeType="string" attributeName="name"/>
            </visualProperty>
            <visualProperty name="NODE_CUSTOMGRAPHICS_2" default="org.cytoscape.ding.customgraphics.NullCustomGraphics,0,[ Remove Graphics ],"/>
            <visualProperty name="NODE_BORDER_WIDTH" default="0.0"/>
            <visualProperty name="NODE_CUSTOMGRAPHICS_POSITION_9" default="C,C,c,0.00,0.00"/>
            <visualProperty name="NODE_VISIBLE" default="true"/>
            <visualProperty name="NODE_DEPTH" default="0.0"/>
            <visualProperty name="COMPOUND_NODE_SHAPE" default="ROUND_RECTANGLE"/>
            <visualProperty name="NODE_LABEL_COLOR" default="#CCCCCC"/>
        </node>
        <edge>
            <dependency name="arrowColorMatchesEdge" value="false"/>
            <visualProperty name="EDGE_VISIBLE" default="true"/>
            <visualProperty name="EDGE_LABEL_COLOR" default="#000000"/>
            <visualProperty name="EDGE_STROKE_SELECTED_PAINT" default="#FF0000"/>
            <visualProperty name="EDGE_CURVED" default="true"/>
            <visualProperty name="EDGE_SELECTED" default="false"/>
            <visualProperty name="EDGE_LABEL" default=""/>
            <visualProperty name="EDGE_STROKE_UNSELECTED_PAINT" default="#666666"/>
            <visualProperty name="EDGE_LABEL_WIDTH" default="200.0"/>
            <visualProperty name="EDGE_TRANSPARENCY" default="255"/>
            <visualProperty name="EDGE_LABEL_FONT_FACE" default="SansSerif.plain,plain,10"/>
            <visualProperty name="EDGE_LINE_TYPE" default="SOLID"/>
            <visualProperty name="EDGE_SOURCE_ARROW_SELECTED_PAINT" default="#FFFF00"/>
            <visualProperty name="EDGE_LABEL_FONT_SIZE" default="10"/>
            <visualProperty name="EDGE_SOURCE_ARROW_UNSELECTED_PAINT" default="#000000"/>
            <visualProperty name="EDGE_TARGET_ARROW_SIZE" default="6.0"/>
            <visualProperty name="EDGE_WIDTH" default="1.0"/>
            <visualProperty name="EDGE_TARGET_ARROW_UNSELECTED_PAINT" default="#000000"/>
            <visualProperty name="EDGE_LABEL_TRANSPARENCY" default="255"/>
            <visualProperty name="EDGE_TOOLTIP" default=""/>
            <visualProperty name="EDGE_TARGET_ARROW_SHAPE" default="NONE"/>
            <visualProperty name="EDGE_SOURCE_ARROW_SIZE" default="6.0"/>
            <visualProperty name="EDGE_TARGET_ARROW_SELECTED_PAINT" default="#FFFF00"/>
            <visualProperty name="EDGE_SOURCE_ARROW_SHAPE" default="NONE"/>
        </edge>
    </visualStyle>
    <visualStyle name="Sample3">
        <network>
            <visualProperty name="NETWORK_TITLE" default=""/>
            <visualProperty name="NETWORK_EDGE_SELECTION" default="true"/>
            <visualProperty name="NETWORK_BACKGROUND_PAINT" default="#3E3E3E"/>
            <visualProperty name="NETWORK_WIDTH" default="550.0"/>
            <visualProperty name="NETWORK_NODE_SELECTION" default="true"/>
            <visualProperty name="NETWORK_CENTER_Z_LOCATION" default="0.0"/>
            <visualProperty name="NETWORK_CENTER_X_LOCATION" default="0.0"/>
            <visualProperty name="NETWORK_SCALE_FACTOR" default="1.0"/>
            <visualProperty name="NETWORK_DEPTH" default="0.0"/>
            <visualProperty name="NETWORK_HEIGHT" default="400.0"/>
            <visualProperty name="NETWORK_CENTER_Y_LOCATION" default="0.0"/>
        </network>
        <node>
            <dependency name="nodeCustomGraphicsSizeSync" value="true"/>
            <dependency name="nodeSizeLocked" value="true"/>
            <visualProperty name="NODE_CUSTOMGRAPHICS_POSITION_5" default="C,C,c,0.00,0.00"/>
            <visualProperty name="NODE_CUSTOMGRAPHICS_POSITION_6" default="C,C,c,0.00,0.00"/>
            <visualProperty name="NODE_BORDER_PAINT" default="#FFFFFF"/>
            <visualProperty name="NODE_CUSTOMGRAPHICS_SIZE_5" default="0.0"/>
            <visualProperty name="NODE_CUSTOMGRAPHICS_SIZE_8" default="0.0"/>
            <visualProperty name="NODE_CUSTOMGRAPHICS_8" default="org.cytoscape.ding.customgraphics.NullCustomGraphics,0,[ Remove Graphics ],"/>
            <visualProperty name="NODE_CUSTOMGRAPHICS_SIZE_7" default="0.0"/>
            <visualProperty name="NODE_CUSTOMGRAPHICS_SIZE_6" default="0.0"/>
            <visualProperty name="NODE_LABEL_WIDTH" default="200.0"/>
            <visualProperty name="NODE_CUSTOMGRAPHICS_POSITION_7" default="C,C,c,0.00,0.00"/>
            <visualProperty name="NODE_CUSTOMGRAPHICS_SIZE_9" default="0.0"/>
            <visualProperty name="NODE_SIZE" default="20.0"/>
            <visualProperty name="NODE_CUSTOMGRAPHICS_SIZE_4" default="0.0"/>
            <visualProperty name="NODE_CUSTOMGRAPHICS_3" default="org.cytoscape.ding.customgraphics.NullCustomGraphics,0,[ Remove Graphics ],"/>
            <visualProperty name="NODE_LABEL_POSITION" default="S,NW,c,0.00,3.00"/>
            <visualProperty name="NODE_CUSTOMGRAPHICS_POSITION_4" default="C,C,c,0.00,0.00"/>
            <visualProperty name="NODE_CUSTOMGRAPHICS_7" default="org.cytoscape.ding.customgraphics.NullCustomGraphics,0,[ Remove Graphics ],"/>
            <visualProperty name="NODE_Z_LOCATION" default="0.0"/>
            <visualProperty name="NODE_CUSTOMGRAPHICS_4" default="org.cytoscape.ding.customgraphics.NullCustomGraphics,0,[ Remove Graphics ],"/>
            <visualProperty name="NODE_CUSTOMGRAPHICS_POSITION_3" default="C,C,c,0.00,0.00"/>
            <visualProperty name="NODE_NESTED_NETWORK_IMAGE_VISIBLE" default="true"/>
            <visualProperty name="NODE_TRANSPARENCY" default="255"/>
            <visualProperty name="COMPOUND_NODE_PADDING" default="10.0"/>
            <visualProperty name="NODE_WIDTH" default="60.0"/>
            <visualProperty name="NODE_CUSTOMGRAPHICS_POSITION_8" default="C,C,c,0.00,0.00"/>
            <visualProperty name="NODE_CUSTOMGRAPHICS_1" default="org.cytoscape.ding.customgraphics.NullCustomGraphics,0,[ Remove Graphics ],"/>
            <visualProperty name="NODE_LABEL_FONT_SIZE" default="14"/>
            <visualProperty name="NODE_Y_LOCATION" default="0.0"/>
            <visualProperty name="NODE_LABEL_FONT_FACE" default="SansSerif.plain,plain,12"/>
            <visualProperty name="NODE_CUSTOMGRAPHICS_5" default="org.cytoscape.ding.customgraphics.NullCustomGraphics,0,[ Remove Graphics ],"/>
            <visualProperty name="NODE_CUSTOMGRAPHICS_SIZE_2" default="0.0"/>
            <visualProperty name="NODE_BORDER_STROKE" default="SOLID"/>
            <visualProperty name="NODE_LABEL_TRANSPARENCY" default="255"/>
            <visualProperty name="NODE_TOOLTIP" default=""/>
            <visualProperty name="NODE_SELECTED_PAINT" default="#FFFF00"/>
            <visualProperty name="NODE_FILL_COLOR" default="#3D9AFF"/>
            <visualProperty name="NODE_CUSTOMGRAPHICS_POSITION_1" default="C,C,c,0.00,0.00"/>
            <visualProperty name="NODE_CUSTOMGRAPHICS_POSITION_2" default="C,C,c,0.00,0.00"/>
            <visualProperty name="NODE_CUSTOMGRAPHICS_SIZE_3" default="0.0"/>
            <visualProperty name="NODE_BORDER_TRANSPARENCY" default="255"/>
            <visualProperty name="NODE_CUSTOMGRAPHICS_9" default="org.cytoscape.ding.customgraphics.NullCustomGraphics,0,[ Remove Graphics ],"/>
            <visualProperty name="NODE_CUSTOMGRAPHICS_SIZE_1" default="0.0"/>
            <visualProperty name="NODE_SELECTED" default="false"/>
            <visualProperty name="NODE_X_LOCATION" default="0.0"/>
            <visualProperty name="NODE_CUSTOMGRAPHICS_6" default="org.cytoscape.ding.customgraphics.NullCustomGraphics,0,[ Remove Graphics ],"/>
            <visualProperty name="NODE_SHAPE" default="ELLIPSE"/>
            <visualProperty name="NODE_HEIGHT" default="40.0"/>
            <visualProperty name="NODE_LABEL" default="">
                <passthroughMapping attributeType="string" attributeName="name"/>
            </visualProperty>
            <visualProperty name="NODE_CUSTOMGRAPHICS_2" default="org.cytoscape.ding.customgraphics.NullCustomGraphics,0,[ Remove Graphics ],"/>
            <visualProperty name="NODE_BORDER_WIDTH" default="8.0"/>
            <visualProperty name="NODE_CUSTOMGRAPHICS_POSITION_9" default="C,C,c,0.00,0.00"/>
            <visualProperty name="NODE_VISIBLE" default="true"/>
            <visualProperty name="NODE_DEPTH" default="0.0"/>
            <visualProperty name="COMPOUND_NODE_SHAPE" default="ROUND_RECTANGLE"/>
            <visualProperty name="NODE_LABEL_COLOR" default="#CECECE"/>
        </node>
        <edge>
            <dependency name="arrowColorMatchesEdge" value="false"/>
            <visualProperty name="EDGE_VISIBLE" default="true"/>
            <visualProperty name="EDGE_LABEL_COLOR" default="#000000"/>
            <visualProperty name="EDGE_STROKE_SELECTED_PAINT" default="#FF0000"/>
            <visualProperty name="EDGE_CURVED" default="true"/>
            <visualProperty name="EDGE_SELECTED" default="false"/>
            <visualProperty name="EDGE_LABEL" default=""/>
            <visualProperty name="EDGE_STROKE_UNSELECTED_PAINT" default="#FFFFFF"/>
            <visualProperty name="EDGE_LABEL_WIDTH" default="200.0"/>
            <visualProperty name="EDGE_TRANSPARENCY" default="255"/>
            <visualProperty name="EDGE_LABEL_FONT_FACE" default="SansSerif.plain,plain,10"/>
            <visualProperty name="EDGE_LINE_TYPE" default="SOLID"/>
            <visualProperty name="EDGE_SOURCE_ARROW_SELECTED_PAINT" default="#FFFF00"/>
            <visualProperty name="EDGE_LABEL_FONT_SIZE" default="10"/>
            <visualProperty name="EDGE_SOURCE_ARROW_UNSELECTED_PAINT" default="#000000"/>
            <visualProperty name="EDGE_TARGET_ARROW_SIZE" default="6.0"/>
            <visualProperty name="EDGE_WIDTH" default="2.0"/>
            <visualProperty name="EDGE_TARGET_ARROW_UNSELECTED_PAINT" default="#000000"/>
            <visualProperty name="EDGE_LABEL_TRANSPARENCY" default="255"/>
            <visualProperty name="EDGE_TOOLTIP" default=""/>
            <visualProperty name="EDGE_TARGET_ARROW_SHAPE" default="NONE"/>
            <visualProperty name="EDGE_SOURCE_ARROW_SIZE" default="6.0"/>
            <visualProperty name="EDGE_TARGET_ARROW_SELECTED_PAINT" default="#FFFF00"/>
            <visualProperty name="EDGE_SOURCE_ARROW_SHAPE" default="NONE"/>
        </edge>
    </visualStyle>
</vizmap>
