# Supplementary material
Source: publisher figshare collection journal article supplement (https://springernature.figshare.com/ndownloader/files/17562821)
Supplement: Supplementary file 1 [file 17562821 › CytoscapeSession-2018_09_25-21_15/tables/9166-STG%2C+Model+4/HIDDEN-org.cytoscape.model.CyNetwork-9166+hidden+network.cytable]

"CyCSV-Version","1"
"SUID"
"java.lang.Long"
""
"9166 hidden network",""
