# Supplementary material
Source: publisher figshare collection journal article supplement (https://springernature.figshare.com/ndownloader/files/17562821)
Supplement: Supplementary file 1 [file 17562821 › CytoscapeSession-2018_09_25-21_15/tables/9166-STG%2C+Model+4/SHARED_ATTRS-org.cytoscape.model.CyEdge-STG%2C+Model+4+root+shared++edge.cytable]

CyCSV-Version	1
SUID	shared interaction	shared name
java.lang.Long	java.lang.String	java.lang.String
STG, Model 4 root shared edge
14311	1	0000000000 (1) 0000000010
14310	1	0000000000 (1) 0001000000
14307	1	1000000000 (1) 1000000010
14306	1	1000000000 (1) 1001000000
14305	1	1000000000 (1) 1100000000
14300	1	1100000000 (1) 1100000010
14299	1	1100000000 (1) 1101000000
14295	1	0100000000 (1) 0100000010
14294	1	0100000000 (1) 0101000000
14293	1	0100000000 (1) 0000000000
14287	1	1010000000 (1) 1010000010
14286	1	1010000000 (1) 1000000000
14285	1	1010000000 (1) 1110000000
14280	1	0010000000 (1) 0010000010
14279	1	0010000000 (1) 0000000000
14282	1	1110000000 (1) 1110000010
14281	1	1110000000 (1) 1100000000
14276	1	0110000000 (1) 0110000010
14275	1	0110000000 (1) 0100000000
14274	1	0110000000 (1) 0010000000
14308	1	0001000000 (1) 0001000010
14302	1	1001000000 (1) 1001000010
14301	1	1001000000 (1) 1101000000
14297	1	1101000000 (1) 1101000010
14296	1	1101000000 (1) 1101100000
14290	1	0101000000 (1) 0101000010
14289	1	0101000000 (1) 0101100000
14288	1	0101000000 (1) 0001000000
14264	1	1011000000 (1) 1011000010
14263	1	1011000000 (1) 1010000000
14262	1	1011000000 (1) 1001000000
14261	1	1011000000 (1) 1111000000
14253	1	0011000000 (1) 0011000010
14252	1	0011000000 (1) 0010000000
14251	1	0011000000 (1) 0001000000
14257	1	1111000000 (1) 1111000010
14256	1	1111000000 (1) 1111100000
14255	1	1111000000 (1) 1110000000
14254	1	1111000000 (1) 1101000000
14242	1	0111000000 (1) 0111000010
14241	1	0111000000 (1) 0111100000
14240	1	0111000000 (1) 0110000000
14239	1	0111000000 (1) 0101000000
14238	1	0111000000 (1) 0011000000
14229	1	1000100000 (1) 1000110000
14228	1	1000100000 (1) 1000000000
14227	1	1000100000 (1) 1001100000
14226	1	1000100000 (1) 1010100000
14225	1	1000100000 (1) 1100100000
14210	1	0000100000 (1) 0000110000
14209	1	0000100000 (1) 0000000000
14208	1	0000100000 (1) 0001100000
14207	1	0000100000 (1) 0010100000
14213	1	1100100000 (1) 1100110000
14212	1	1100100000 (1) 1100000000
14211	1	1100100000 (1) 1101100000
14193	1	0100100000 (1) 0100110000
14192	1	0100100000 (1) 0100000000
14191	1	0100100000 (1) 0101100000
14190	1	0100100000 (1) 0000100000
14216	1	1010100000 (1) 1010110000
14215	1	1010100000 (1) 1010000000
14214	1	1010100000 (1) 1110100000
14199	1	0010100000 (1) 0010110000
14198	1	0010100000 (1) 0010000000
14183	1	1110100000 (1) 1110110000
14182	1	1110100000 (1) 1110000000
14181	1	1110100000 (1) 1100100000
14174	1	0110100000 (1) 0110110000
14173	1	0110100000 (1) 0110000000
14172	1	0110100000 (1) 0100100000
14171	1	0110100000 (1) 0010100000
14220	1	1001100000 (1) 1001110000
14219	1	1001100000 (1) 1001000000
14218	1	1001100000 (1) 1011100000
14217	1	1001100000 (1) 1101100000
14159	1	1000010000 (1) 1000010010
14158	1	1000010000 (1) 1000011000
14157	1	1000010000 (1) 1000000000
14156	1	1000010000 (1) 1001010000
14202	1	0001100000 (1) 0001110000
14201	1	0001100000 (1) 0001000000
14200	1	0001100000 (1) 0011100000
14140	1	0000010000 (1) 0000010010
14139	1	0000010000 (1) 0000011000
14138	1	0000010000 (1) 0000000000
14137	1	0000010000 (1) 0001010000
14269	1	1101100000 (1) 1101110000
14125	1	1100010000 (1) 1100010010
14124	1	1100010000 (1) 1100011000
14123	1	1100010000 (1) 1100000000
14122	1	1100010000 (1) 1101010000
14121	1	1100010000 (1) 1000010000
14266	1	0101100000 (1) 0101110000
14265	1	0101100000 (1) 0001100000
14105	1	0100010000 (1) 0100010010
14104	1	0100010000 (1) 0100011000
14103	1	0100010000 (1) 0100000000
14102	1	0100010000 (1) 0101010000
14101	1	0100010000 (1) 0000010000
14163	1	1011100000 (1) 1011110000
14162	1	1011100000 (1) 1011000000
14161	1	1011100000 (1) 1010100000
14160	1	1011100000 (1) 1111100000
14084	1	1010010000 (1) 1010010010
14083	1	1010010000 (1) 1010011000
14082	1	1010010000 (1) 1010000000
14081	1	1010010000 (1) 1000010000
14143	1	0011100000 (1) 0011110000
14142	1	0011100000 (1) 0011000000
14141	1	0011100000 (1) 0010100000
14071	1	0010010000 (1) 0010010010
14070	1	0010010000 (1) 0010011000
14069	1	0010010000 (1) 0010000000
14068	1	0010010000 (1) 0000010000
14245	1	1111100000 (1) 1111110000
14244	1	1111100000 (1) 1110100000
14243	1	1111100000 (1) 1101100000
14057	1	1110010000 (1) 1110010010
14056	1	1110010000 (1) 1110011000
14055	1	1110010000 (1) 1110000000
14054	1	1110010000 (1) 1100010000
14053	1	1110010000 (1) 1010010000
14233	1	0111100000 (1) 0111110000
14232	1	0111100000 (1) 0110100000
14231	1	0111100000 (1) 0101100000
14230	1	0111100000 (1) 0011100000
14040	1	0110010000 (1) 0110010010
14039	1	0110010000 (1) 0110011000
14038	1	0110010000 (1) 0110000000
14037	1	0110010000 (1) 0100010000
14036	1	0110010000 (1) 0010010000
14149	1	1001010000 (1) 1001010010
14148	1	1001010000 (1) 1001011000
14147	1	1001010000 (1) 1001000000
14130	1	0001010000 (1) 0001010010
14129	1	0001010000 (1) 0001011000
14128	1	0001010000 (1) 0001000000
14112	1	1101010000 (1) 1101010010
14111	1	1101010000 (1) 1101011000
14110	1	1101010000 (1) 1101000000
14109	1	1101010000 (1) 1101110000
14108	1	1101010000 (1) 1001010000
14092	1	0101010000 (1) 0101010010
14091	1	0101010000 (1) 0101011000
14090	1	0101010000 (1) 0101000000
14089	1	0101010000 (1) 0101110000
14088	1	0101010000 (1) 0001010000
14003	1	1000001000 (1) 1000001010
14002	1	1000001000 (1) 1000000000
14001	1	1000001000 (1) 1001001000
14000	1	1000001000 (1) 1100001000
13990	1	0000001000 (1) 0000001010
13989	1	0000001000 (1) 0000000000
13988	1	0000001000 (1) 0001001000
13993	1	1100001000 (1) 1100001010
13992	1	1100001000 (1) 1100000000
13991	1	1100001000 (1) 1101001000
13978	1	0100001000 (1) 0100001010
13977	1	0100001000 (1) 0100000000
13976	1	0100001000 (1) 0101001000
13975	1	0100001000 (1) 0000001000
13967	1	1011010000 (1) 1011010010
13966	1	1011010000 (1) 1011011000
13965	1	1011010000 (1) 1011000000
13964	1	1011010000 (1) 1010010000
13963	1	1011010000 (1) 1001010000
13954	1	0011010000 (1) 0011010010
13953	1	0011010000 (1) 0011011000
13952	1	0011010000 (1) 0011000000
13951	1	0011010000 (1) 0010010000
13950	1	0011010000 (1) 0001010000
13941	1	0111010000 (1) 0111010010
13940	1	0111010000 (1) 0111011000
13939	1	0111010000 (1) 0111000000
13938	1	0111010000 (1) 0111110000
13937	1	0111010000 (1) 0110010000
13936	1	0111010000 (1) 0101010000
13935	1	0111010000 (1) 0011010000
13922	1	1111010000 (1) 1111010010
13921	1	1111010000 (1) 1111011000
13920	1	1111010000 (1) 1111000000
13919	1	1111010000 (1) 1111110000
13918	1	1111010000 (1) 1110010000
13917	1	1111010000 (1) 1101010000
13916	1	1111010000 (1) 1011010000
13903	1	1010001000 (1) 1010001010
13902	1	1010001000 (1) 1010000000
13901	1	1010001000 (1) 1000001000
13900	1	1010001000 (1) 1110001000
13893	1	0010001000 (1) 0010001010
13892	1	0010001000 (1) 0010000000
13891	1	0010001000 (1) 0000001000
14224	1	1000110000 (1) 1000111000
14223	1	1000110000 (1) 1000010000
14222	1	1000110000 (1) 1001110000
14221	1	1000110000 (1) 1010110000
13896	1	1110001000 (1) 1110001010
13895	1	1110001000 (1) 1110000000
13894	1	1110001000 (1) 1100001000
14206	1	0000110000 (1) 0000111000
14205	1	0000110000 (1) 0000010000
14204	1	0000110000 (1) 0001110000
14203	1	0000110000 (1) 0010110000
13878	1	0110001000 (1) 0110001010
13877	1	0110001000 (1) 0110000000
13876	1	0110001000 (1) 0100001000
13875	1	0110001000 (1) 0010001000
14197	1	1100110000 (1) 1100111000
14196	1	1100110000 (1) 1100010000
14195	1	1100110000 (1) 1101110000
14194	1	1100110000 (1) 1000110000
14189	1	0100110000 (1) 0100111000
14188	1	0100110000 (1) 0100010000
14187	1	0100110000 (1) 0101110000
14186	1	0100110000 (1) 0000110000
14185	1	1010110000 (1) 1010111000
14184	1	1010110000 (1) 1010010000
13996	1	1001001000 (1) 1001001010
13995	1	1001001000 (1) 1001000000
13994	1	1001001000 (1) 1101001000
14180	1	0010110000 (1) 0010111000
14179	1	0010110000 (1) 0010010000
13985	1	0001001000 (1) 0001001010
13984	1	0001001000 (1) 0001000000
14178	1	1110110000 (1) 1110111000
14177	1	1110110000 (1) 1110010000
14176	1	1110110000 (1) 1100110000
14175	1	1110110000 (1) 1010110000
13981	1	1101001000 (1) 1101001010
13980	1	1101001000 (1) 1101000000
13979	1	1101001000 (1) 1101101000
14170	1	0110110000 (1) 0110111000
14169	1	0110110000 (1) 0110010000
14168	1	0110110000 (1) 0100110000
14167	1	0110110000 (1) 0010110000
13971	1	0101001000 (1) 0101001010
13970	1	0101001000 (1) 0101000000
13969	1	0101001000 (1) 0101101000
13968	1	0101001000 (1) 0001001000
13838	1	1000000100 (1) 1000000110
13837	1	1000000100 (1) 1000000000
13836	1	1000000100 (1) 1000100100
13835	1	1000000100 (1) 1001000100
13834	1	1000000100 (1) 1010000100
13833	1	1000000100 (1) 1100000100
13808	1	1011001000 (1) 1011001010
13807	1	1011001000 (1) 1011000000
13806	1	1011001000 (1) 1010001000
13805	1	1011001000 (1) 1001001000
13804	1	1011001000 (1) 1111001000
13794	1	0000000100 (1) 0000000110
13793	1	0000000100 (1) 0000000000
13792	1	0000000100 (1) 0000100100
13791	1	0000000100 (1) 0001000100
13790	1	0000000100 (1) 0010000100
13774	1	0011001000 (1) 0011001010
13773	1	0011001000 (1) 0011000000
13772	1	0011001000 (1) 0010001000
13771	1	0011001000 (1) 0001001000
14166	1	1001110000 (1) 1001111000
14165	1	1001110000 (1) 1001010000
14164	1	1001110000 (1) 1011110000
13813	1	1100000100 (1) 1100000110
13812	1	1100000100 (1) 1100000000
13811	1	1100000100 (1) 1100100100
13810	1	1100000100 (1) 1101000100
13809	1	1100000100 (1) 1110000100
13799	1	1111001000 (1) 1111001010
13798	1	1111001000 (1) 1111000000
13797	1	1111001000 (1) 1111101000
13796	1	1111001000 (1) 1110001000
13795	1	1111001000 (1) 1101001000
14146	1	0001110000 (1) 0001111000
14145	1	0001110000 (1) 0001010000
14144	1	0001110000 (1) 0011110000
13738	1	0100000100 (1) 0100000110
13737	1	0100000100 (1) 0100000000
13736	1	0100000100 (1) 0100100100
13735	1	0100000100 (1) 0101000100
13734	1	0100000100 (1) 0110000100
13733	1	0100000100 (1) 0000000100
13713	1	0111001000 (1) 0111001010
13712	1	0111001000 (1) 0111000000
13711	1	0111001000 (1) 0111101000
13710	1	0111001000 (1) 0110001000
13709	1	0111001000 (1) 0101001000
13708	1	0111001000 (1) 0011001000
14127	1	1101110000 (1) 1101111000
14126	1	1101110000 (1) 1001110000
14107	1	0101110000 (1) 0101111000
14106	1	0101110000 (1) 0001110000
13693	1	0000101000 (1) 0000100000
13692	1	0000101000 (1) 0000111000
13691	1	0000101000 (1) 0000001000
13690	1	0000101000 (1) 0001101000
13689	1	0000101000 (1) 0010101000
13681	1	1000101000 (1) 1000100000
13680	1	1000101000 (1) 1000111000
13679	1	1000101000 (1) 1000001000
13678	1	1000101000 (1) 1001101000
13677	1	1000101000 (1) 1010101000
13676	1	1000101000 (1) 1100101000
13817	1	1010000100 (1) 1010000110
13816	1	1010000100 (1) 1010000000
13815	1	1010000100 (1) 1010100100
13814	1	1010000100 (1) 1110000100
13666	1	1100101000 (1) 1100100000
13665	1	1100101000 (1) 1100111000
13664	1	1100101000 (1) 1100001000
13663	1	1100101000 (1) 1101101000
13777	1	0010000100 (1) 0010000110
13776	1	0010000100 (1) 0010000000
13775	1	0010000100 (1) 0010100100
13652	1	0100101000 (1) 0100100000
13651	1	0100101000 (1) 0100111000
13650	1	0100101000 (1) 0100001000
13649	1	0100101000 (1) 0101101000
13648	1	0100101000 (1) 0000101000
14087	1	1011110000 (1) 1011111000
14086	1	1011110000 (1) 1011010000
14085	1	1011110000 (1) 1010110000
13752	1	1110000100 (1) 1110000110
13751	1	1110000100 (1) 1110000000
13750	1	1110000100 (1) 1110100100
14074	1	0011110000 (1) 0011111000
14073	1	0011110000 (1) 0011010000
14072	1	0011110000 (1) 0010110000
13717	1	0110000100 (1) 0110000110
13716	1	0110000100 (1) 0110000000
13715	1	0110000100 (1) 0110100100
13714	1	0110000100 (1) 0010000100
14061	1	1111110000 (1) 1111111000
14060	1	1111110000 (1) 1110110000
14059	1	1111110000 (1) 1101110000
14058	1	1111110000 (1) 1011110000
14044	1	0111110000 (1) 0111111000
14043	1	0111110000 (1) 0110110000
14042	1	0111110000 (1) 0101110000
14041	1	0111110000 (1) 0011110000
13684	1	0010101000 (1) 0010100000
13683	1	0010101000 (1) 0010111000
13682	1	0010101000 (1) 0010001000
13670	1	1010101000 (1) 1010100000
13669	1	1010101000 (1) 1010111000
13668	1	1010101000 (1) 1010001000
13667	1	1010101000 (1) 1110101000
13623	1	1110101000 (1) 1110100000
13622	1	1110101000 (1) 1110111000
13621	1	1110101000 (1) 1110001000
13620	1	1110101000 (1) 1100101000
13619	1	0110101000 (1) 0110100000
13618	1	0110101000 (1) 0110111000
13617	1	0110101000 (1) 0110001000
13616	1	0110101000 (1) 0100101000
13615	1	0110101000 (1) 0010101000
13822	1	1001000100 (1) 1001000110
13821	1	1001000100 (1) 1001000000
13820	1	1001000100 (1) 1001100100
13819	1	1001000100 (1) 1011000100
13818	1	1001000100 (1) 1101000100
13781	1	0001000100 (1) 0001000110
13780	1	0001000100 (1) 0001000000
13779	1	0001000100 (1) 0001100100
13778	1	0001000100 (1) 0011000100
13756	1	1101000100 (1) 1101000110
13755	1	1101000100 (1) 1101000000
13754	1	1101000100 (1) 1101100100
13753	1	1101000100 (1) 1111000100
13722	1	0101000100 (1) 0101000110
13721	1	0101000100 (1) 0101000000
13720	1	0101000100 (1) 0101100100
13719	1	0101000100 (1) 0111000100
13718	1	0101000100 (1) 0001000100
14153	1	1000011000 (1) 1000011010
14152	1	1000011000 (1) 1000011100
14151	1	1000011000 (1) 1000001000
14150	1	1000011000 (1) 1001011000
14134	1	0000011000 (1) 0000011010
14133	1	0000011000 (1) 0000011100
14132	1	0000011000 (1) 0000001000
14131	1	0000011000 (1) 0001011000
13688	1	0001101000 (1) 0001100000
13687	1	0001101000 (1) 0001111000
13686	1	0001101000 (1) 0001001000
13685	1	0001101000 (1) 0011101000
13675	1	1001101000 (1) 1001100000
13674	1	1001101000 (1) 1001111000
13673	1	1001101000 (1) 1001001000
13672	1	1001101000 (1) 1011101000
13671	1	1001101000 (1) 1101101000
13850	1	1101101000 (1) 1101100000
13849	1	1101101000 (1) 1101111000
14117	1	1100011000 (1) 1100011010
14116	1	1100011000 (1) 1100011100
14115	1	1100011000 (1) 1100001000
14114	1	1100011000 (1) 1101011000
14113	1	1100011000 (1) 1000011000
13606	1	1011000100 (1) 1011000110
13605	1	1011000100 (1) 1011000000
13604	1	1011000100 (1) 1011100100
13603	1	1011000100 (1) 1010000100
13602	1	1011000100 (1) 1111000100
13595	1	0011000100 (1) 0011000110
13594	1	0011000100 (1) 0011000000
13593	1	0011000100 (1) 0011100100
13592	1	0011000100 (1) 0010000100
13841	1	0101101000 (1) 0101100000
13840	1	0101101000 (1) 0101111000
13839	1	0101101000 (1) 0001101000
14097	1	0100011000 (1) 0100011010
14096	1	0100011000 (1) 0100011100
14095	1	0100011000 (1) 0100001000
14094	1	0100011000 (1) 0101011000
14093	1	0100011000 (1) 0000011000
13585	1	1111000100 (1) 1111000110
13584	1	1111000100 (1) 1111000000
13583	1	1111000100 (1) 1111100100
13582	1	1111000100 (1) 1110000100
13573	1	0111000100 (1) 0111000110
13572	1	0111000100 (1) 0111000000
13571	1	0111000100 (1) 0111100100
13570	1	0111000100 (1) 0110000100
13569	1	0111000100 (1) 0011000100
14309	1	0000000010 (1) 0001000010
14304	1	1000000010 (1) 1001000010
14303	1	1000000010 (1) 1100000010
14298	1	1100000010 (1) 1101000010
13827	1	1000100100 (1) 1000100000
13826	1	1000100100 (1) 1000110100
13825	1	1000100100 (1) 1001100100
13824	1	1000100100 (1) 1010100100
13823	1	1000100100 (1) 1100100100
14078	1	1010011000 (1) 1010011010
14077	1	1010011000 (1) 1010011100
14076	1	1010011000 (1) 1010001000
14075	1	1010011000 (1) 1000011000
14292	1	0100000010 (1) 0101000010
14291	1	0100000010 (1) 0000000010
14065	1	0010011000 (1) 0010011010
14064	1	0010011000 (1) 0010011100
14063	1	0010011000 (1) 0010001000
14062	1	0010011000 (1) 0000011000
13785	1	0000100100 (1) 0000100000
13784	1	0000100100 (1) 0000110100
13783	1	0000100100 (1) 0001100100
13782	1	0000100100 (1) 0010100100
13552	1	0011101000 (1) 0011100000
13551	1	0011101000 (1) 0011111000
13550	1	0011101000 (1) 0011001000
13549	1	0011101000 (1) 0010101000
13548	1	1011101000 (1) 1011100000
13547	1	1011101000 (1) 1011111000
13546	1	1011101000 (1) 1011001000
13545	1	1011101000 (1) 1010101000
13544	1	1011101000 (1) 1111101000
14049	1	1110011000 (1) 1110011010
14048	1	1110011000 (1) 1110011100
14047	1	1110011000 (1) 1110001000
14046	1	1110011000 (1) 1100011000
14045	1	1110011000 (1) 1010011000
13760	1	1100100100 (1) 1100100000
13759	1	1100100100 (1) 1100110100
13758	1	1100100100 (1) 1101100100
13757	1	1100100100 (1) 1110100100
13745	1	1111101000 (1) 1111100000
13744	1	1111101000 (1) 1111111000
13743	1	1111101000 (1) 1110101000
13742	1	1111101000 (1) 1101101000
14032	1	0110011000 (1) 0110011010
14031	1	0110011000 (1) 0110011100
14030	1	0110011000 (1) 0110001000
14029	1	0110011000 (1) 0100011000
14028	1	0110011000 (1) 0010011000
13727	1	0100100100 (1) 0100100000
13726	1	0100100100 (1) 0100110100
13725	1	0100100100 (1) 0101100100
13724	1	0100100100 (1) 0110100100
13723	1	0100100100 (1) 0000100100
13702	1	0111101000 (1) 0111100000
13701	1	0111101000 (1) 0111111000
13700	1	0111101000 (1) 0110101000
13699	1	0111101000 (1) 0101101000
13698	1	0111101000 (1) 0011101000
14284	1	1010000010 (1) 1000000010
14283	1	1010000010 (1) 1110000010
14278	1	0010000010 (1) 0000000010
14277	1	1110000010 (1) 1100000010
13659	1	1010100100 (1) 1010100000
13658	1	1010100100 (1) 1010110100
13657	1	1010100100 (1) 1110100100
14273	1	0110000010 (1) 0100000010
14272	1	0110000010 (1) 0010000010
13654	1	0010100100 (1) 0010100000
13653	1	0010100100 (1) 0010110100
13642	1	1110100100 (1) 1110100000
13641	1	1110100100 (1) 1110110100
14026	1	1001011000 (1) 1001011010
14025	1	1001011000 (1) 1001011100
14024	1	1001011000 (1) 1001001000
14022	1	0001011000 (1) 0001011010
14021	1	0001011000 (1) 0001011100
14020	1	0001011000 (1) 0001001000
13634	1	0110100100 (1) 0110100000
13633	1	0110100100 (1) 0110110100
13632	1	0110100100 (1) 0010100100
14016	1	1101011000 (1) 1101011010
14015	1	1101011000 (1) 1101011100
14014	1	1101011000 (1) 1101001000
14013	1	1101011000 (1) 1101111000
14012	1	1101011000 (1) 1001011000
14008	1	0101011000 (1) 0101011010
14007	1	0101011000 (1) 0101011100
14006	1	0101011000 (1) 0101001000
14005	1	0101011000 (1) 0101111000
14004	1	0101011000 (1) 0001011000
14271	1	1001000010 (1) 1101000010
14270	1	1101000010 (1) 1101100010
13610	1	1001100100 (1) 1001100000
13609	1	1001100100 (1) 1001110100
13608	1	1001100100 (1) 1011100100
13607	1	1001100100 (1) 1101100100
13959	1	1011011000 (1) 1011011010
13958	1	1011011000 (1) 1011011100
13957	1	1011011000 (1) 1011001000
13956	1	1011011000 (1) 1010011000
13955	1	1011011000 (1) 1001011000
14268	1	0101000010 (1) 0101100010
14267	1	0101000010 (1) 0001000010
13598	1	0001100100 (1) 0001100000
13597	1	0001100100 (1) 0001110100
13596	1	0001100100 (1) 0011100100
13946	1	0011011000 (1) 0011011010
13945	1	0011011000 (1) 0011011100
13944	1	0011011000 (1) 0011001000
13943	1	0011011000 (1) 0010011000
13942	1	0011011000 (1) 0001011000
13380	1	0000010100 (1) 0000010110
13379	1	0000010100 (1) 0000010000
13378	1	0000010100 (1) 0000011100
13377	1	0000010100 (1) 0000000100
13376	1	0000010100 (1) 0000110100
13375	1	0000010100 (1) 0001010100
13374	1	0000010100 (1) 0010010100
13357	1	1000010100 (1) 1000010110
13356	1	1000010100 (1) 1000010000
13355	1	1000010100 (1) 1000011100
13354	1	1000010100 (1) 1000000100
13353	1	1000010100 (1) 1000110100
13352	1	1000010100 (1) 1001010100
13351	1	1000010100 (1) 1010010100
13588	1	1101100100 (1) 1101100000
13587	1	1101100100 (1) 1101110100
13586	1	1101100100 (1) 1111100100
13577	1	0101100100 (1) 0101100000
13576	1	0101100100 (1) 0101110100
13575	1	0101100100 (1) 0111100100
13574	1	0101100100 (1) 0001100100
13929	1	0111011000 (1) 0111011010
13928	1	0111011000 (1) 0111011100
13927	1	0111011000 (1) 0111001000
13926	1	0111011000 (1) 0111111000
13925	1	0111011000 (1) 0110011000
13924	1	0111011000 (1) 0101011000
13923	1	0111011000 (1) 0011011000
13910	1	1111011000 (1) 1111011010
13909	1	1111011000 (1) 1111011100
13908	1	1111011000 (1) 1111001000
13907	1	1111011000 (1) 1111111000
13906	1	1111011000 (1) 1110011000
13905	1	1111011000 (1) 1101011000
13904	1	1111011000 (1) 1011011000
13302	1	0100010100 (1) 0100010110
13301	1	0100010100 (1) 0100010000
13300	1	0100010100 (1) 0100011100
13299	1	0100010100 (1) 0100000100
13298	1	0100010100 (1) 0100110100
13297	1	0100010100 (1) 0101010100
13296	1	0100010100 (1) 0110010100
13295	1	0100010100 (1) 0000010100
13275	1	1100010100 (1) 1100010110
13274	1	1100010100 (1) 1100010000
13273	1	1100010100 (1) 1100011100
13272	1	1100010100 (1) 1100000100
13271	1	1100010100 (1) 1100110100
13270	1	1100010100 (1) 1101010100
13269	1	1100010100 (1) 1110010100
13268	1	1100010100 (1) 1000010100
14260	1	1011000010 (1) 1010000010
14259	1	1011000010 (1) 1001000010
14258	1	1011000010 (1) 1111000010
13888	1	1000111000 (1) 1000111100
13887	1	1000111000 (1) 1000011000
13886	1	1000111000 (1) 1001111000
13885	1	1000111000 (1) 1010111000
14250	1	0011000010 (1) 0010000010
14249	1	0011000010 (1) 0001000010
13882	1	0000111000 (1) 0000111100
13881	1	0000111000 (1) 0000011000
13880	1	0000111000 (1) 0001111000
13879	1	0000111000 (1) 0010111000
14248	1	1111000010 (1) 1111100010
14247	1	1111000010 (1) 1110000010
14246	1	1111000010 (1) 1101000010
13871	1	1100111000 (1) 1100111100
13870	1	1100111000 (1) 1100011000
13869	1	1100111000 (1) 1101111000
13868	1	1100111000 (1) 1000111000
13529	1	1011100100 (1) 1011100000
13528	1	1011100100 (1) 1011110100
13527	1	1011100100 (1) 1010100100
13526	1	1011100100 (1) 1111100100
13522	1	0011100100 (1) 0011100000
13521	1	0011100100 (1) 0011110100
13520	1	0011100100 (1) 0010100100
13867	1	0100111000 (1) 0100111100
13866	1	0100111000 (1) 0100011000
13865	1	0100111000 (1) 0101111000
13864	1	0100111000 (1) 0000111000
14237	1	0111000010 (1) 0111100010
14236	1	0111000010 (1) 0110000010
14235	1	0111000010 (1) 0101000010
14234	1	0111000010 (1) 0011000010
13362	1	0010010100 (1) 0010010110
13361	1	0010010100 (1) 0010010000
13360	1	0010010100 (1) 0010011100
13359	1	0010010100 (1) 0010000100
13358	1	0010010100 (1) 0010110100
13339	1	1010010100 (1) 1010010110
13338	1	1010010100 (1) 1010010000
13337	1	1010010100 (1) 1010011100
13336	1	1010010100 (1) 1010000100
13335	1	1010010100 (1) 1010110100
13506	1	1111100100 (1) 1111100000
13505	1	1111100100 (1) 1111110100
13504	1	1111100100 (1) 1110100100
13499	1	0111100100 (1) 0111100000
13498	1	0111100100 (1) 0111110100
13497	1	0111100100 (1) 0110100100
13496	1	0111100100 (1) 0011100100
13281	1	0110010100 (1) 0110010110
13280	1	0110010100 (1) 0110010000
13279	1	0110010100 (1) 0110011100
13278	1	0110010100 (1) 0110000100
13277	1	0110010100 (1) 0110110100
13276	1	0110010100 (1) 0010010100
13254	1	1110010100 (1) 1110010110
13253	1	1110010100 (1) 1110010000
13252	1	1110010100 (1) 1110011100
13251	1	1110010100 (1) 1110000100
13250	1	1110010100 (1) 1110110100
13249	1	1110010100 (1) 1010010100
13197	1	1000100010 (1) 1000100000
13196	1	1000100010 (1) 1000110010
13195	1	1000100010 (1) 1000000010
13194	1	1000100010 (1) 1001100010
13193	1	1000100010 (1) 1010100010
13192	1	1000100010 (1) 1100100010
13174	1	0000100010 (1) 0000100000
13173	1	0000100010 (1) 0000110010
13172	1	0000100010 (1) 0000000010
13171	1	0000100010 (1) 0001100010
13170	1	0000100010 (1) 0010100010
13863	1	1010111000 (1) 1010111100
13862	1	1010111000 (1) 1010011000
13178	1	1100100010 (1) 1100100000
13177	1	1100100010 (1) 1100110010
13176	1	1100100010 (1) 1100000010
13175	1	1100100010 (1) 1101100010
13859	1	0010111000 (1) 0010111100
13858	1	0010111000 (1) 0010011000
13152	1	0100100010 (1) 0100100000
13151	1	0100100010 (1) 0100110010
13150	1	0100100010 (1) 0100000010
13149	1	0100100010 (1) 0101100010
13148	1	0100100010 (1) 0000100010
13143	1	0000000001 (1) 0000000011
13142	1	0000000001 (1) 0000000101
13141	1	0000000001 (1) 0001000001
13132	1	1000000001 (1) 1000000011
13131	1	1000000001 (1) 1000000101
13130	1	1000000001 (1) 1001000001
13129	1	1000000001 (1) 1100000001
13856	1	1110111000 (1) 1110111100
13855	1	1110111000 (1) 1110011000
13854	1	1110111000 (1) 1100111000
13853	1	1110111000 (1) 1010111000
13848	1	0110111000 (1) 0110111100
13847	1	0110111000 (1) 0110011000
13846	1	0110111000 (1) 0100111000
13845	1	0110111000 (1) 0010111000
13117	1	1100000001 (1) 1100000011
13116	1	1100000001 (1) 1100000101
13115	1	1100000001 (1) 1101000001
13101	1	0100000001 (1) 0100000011
13100	1	0100000001 (1) 0100000101
13099	1	0100000001 (1) 0101000001
13098	1	0100000001 (1) 0000000001
13368	1	0001010100 (1) 0001010110
13367	1	0001010100 (1) 0001010000
13366	1	0001010100 (1) 0001011100
13365	1	0001010100 (1) 0001000100
13364	1	0001010100 (1) 0001110100
13363	1	0001010100 (1) 0011010100
13345	1	1001010100 (1) 1001010110
13344	1	1001010100 (1) 1001010000
13343	1	1001010100 (1) 1001011100
13342	1	1001010100 (1) 1001000100
13341	1	1001010100 (1) 1001110100
13340	1	1001010100 (1) 1011010100
13182	1	1010100010 (1) 1010100000
13181	1	1010100010 (1) 1010110010
13180	1	1010100010 (1) 1010000010
13179	1	1010100010 (1) 1110100010
13161	1	0010100010 (1) 0010100000
13160	1	0010100010 (1) 0010110010
13159	1	0010100010 (1) 0010000010
13288	1	0101010100 (1) 0101010110
13287	1	0101010100 (1) 0101010000
13286	1	0101010100 (1) 0101011100
13285	1	0101010100 (1) 0101000100
13284	1	0101010100 (1) 0101110100
13283	1	0101010100 (1) 0111010100
13282	1	0101010100 (1) 0001010100
13261	1	1101010100 (1) 1101010110
13260	1	1101010100 (1) 1101010000
13259	1	1101010100 (1) 1101011100
13258	1	1101010100 (1) 1101000100
13257	1	1101010100 (1) 1101110100
13256	1	1101010100 (1) 1111010100
13255	1	1101010100 (1) 1001010100
13063	1	1110100010 (1) 1110100000
13062	1	1110100010 (1) 1110110010
13061	1	1110100010 (1) 1110000010
13060	1	1110100010 (1) 1100100010
13029	1	1000001100 (1) 1000001110
13028	1	1000001100 (1) 1000001000
13027	1	1000001100 (1) 1000000100
13026	1	1000001100 (1) 1001001100
13025	1	1000001100 (1) 1010001100
13024	1	1000001100 (1) 1100001100
13004	1	0000001100 (1) 0000001110
13003	1	0000001100 (1) 0000001000
13002	1	0000001100 (1) 0000000100
13001	1	0000001100 (1) 0001001100
13000	1	0000001100 (1) 0010001100
12988	1	0110100010 (1) 0110100000
12987	1	0110100010 (1) 0110110010
12986	1	0110100010 (1) 0110000010
12985	1	0110100010 (1) 0100100010
12984	1	0110100010 (1) 0010100010
12979	1	1010000001 (1) 1010000011
12978	1	1010000001 (1) 1010000101
12977	1	1010000001 (1) 1000000001
12976	1	1010000001 (1) 1110000001
12966	1	0010000001 (1) 0010000011
12965	1	0010000001 (1) 0010000101
12964	1	0010000001 (1) 0000000001
13767	1	1001111000 (1) 1001111100
13766	1	1001111000 (1) 1001011000
13765	1	1001111000 (1) 1011111000
13009	1	1100001100 (1) 1100001110
13008	1	1100001100 (1) 1100001000
13007	1	1100001100 (1) 1100000100
13006	1	1100001100 (1) 1101001100
13005	1	1100001100 (1) 1110001100
13741	1	0001111000 (1) 0001111100
13740	1	0001111000 (1) 0001011000
13739	1	0001111000 (1) 0011111000
12943	1	0100001100 (1) 0100001110
12942	1	0100001100 (1) 0100001000
12941	1	0100001100 (1) 0100000100
12940	1	0100001100 (1) 0101001100
12939	1	0100001100 (1) 0110001100
12938	1	0100001100 (1) 0000001100
12969	1	1110000001 (1) 1110000011
12968	1	1110000001 (1) 1110000101
12967	1	1110000001 (1) 1100000001
12918	1	0110000001 (1) 0110000011
12917	1	0110000001 (1) 0110000101
12916	1	0110000001 (1) 0100000001
12915	1	0110000001 (1) 0010000001
13697	1	1101111000 (1) 1101111100
13696	1	1101111000 (1) 1001111000
13695	1	0101111000 (1) 0101111100
13694	1	0101111000 (1) 0001111000
13081	1	0011010100 (1) 0011010110
13080	1	0011010100 (1) 0011010000
13079	1	0011010100 (1) 0011011100
13078	1	0011010100 (1) 0011000100
13077	1	0011010100 (1) 0011110100
13076	1	0011010100 (1) 0010010100
13071	1	1011010100 (1) 1011010110
13070	1	1011010100 (1) 1011010000
13069	1	1011010100 (1) 1011011100
13068	1	1011010100 (1) 1011000100
13067	1	1011010100 (1) 1011110100
13066	1	1011010100 (1) 1010010100
13052	1	0111010100 (1) 0111010110
13051	1	0111010100 (1) 0111010000
13050	1	0111010100 (1) 0111011100
13049	1	0111010100 (1) 0111000100
13048	1	0111010100 (1) 0111110100
13047	1	0111010100 (1) 0110010100
13046	1	0111010100 (1) 0011010100
13040	1	1111010100 (1) 1111010110
13039	1	1111010100 (1) 1111010000
13038	1	1111010100 (1) 1111011100
13037	1	1111010100 (1) 1111000100
13036	1	1111010100 (1) 1111110100
13035	1	1111010100 (1) 1110010100
13034	1	1111010100 (1) 1011010100
14155	1	1000010010 (1) 1000000010
14154	1	1000010010 (1) 1001010010
13013	1	1010001100 (1) 1010001110
13012	1	1010001100 (1) 1010001000
13011	1	1010001100 (1) 1010000100
13010	1	1010001100 (1) 1110001100
13187	1	1001100010 (1) 1001100000
13186	1	1001100010 (1) 1001110010
13185	1	1001100010 (1) 1001000010
13184	1	1001100010 (1) 1011100010
13183	1	1001100010 (1) 1101100010
14136	1	0000010010 (1) 0000000010
14135	1	0000010010 (1) 0001010010
12991	1	0010001100 (1) 0010001110
12990	1	0010001100 (1) 0010001000
12989	1	0010001100 (1) 0010000100
13165	1	0001100010 (1) 0001100000
13164	1	0001100010 (1) 0001110010
13163	1	0001100010 (1) 0001000010
13162	1	0001100010 (1) 0011100010
13407	1	1101100010 (1) 1101100000
13406	1	1101100010 (1) 1101110010
14120	1	1100010010 (1) 1100000010
14119	1	1100010010 (1) 1101010010
14118	1	1100010010 (1) 1000010010
12926	1	0110001100 (1) 0110001110
12925	1	0110001100 (1) 0110001000
12924	1	0110001100 (1) 0110000100
12923	1	0110001100 (1) 0010001100
13134	1	0001000001 (1) 0001000011
13133	1	0001000001 (1) 0001000101
13479	1	0000110100 (1) 0000110000
13478	1	0000110100 (1) 0000111100
13477	1	0000110100 (1) 0001110100
13476	1	0000110100 (1) 0010110100
13647	1	1011111000 (1) 1011111100
13646	1	1011111000 (1) 1011011000
13645	1	1011111000 (1) 1010111000
12948	1	1110001100 (1) 1110001110
12947	1	1110001100 (1) 1110001000
12946	1	1110001100 (1) 1110000100
13640	1	0011111000 (1) 0011111100
13639	1	0011111000 (1) 0011011000
13638	1	0011111000 (1) 0010111000
13120	1	1001000001 (1) 1001000011
13119	1	1001000001 (1) 1001000101
13118	1	1001000001 (1) 1101000001
14100	1	0100010010 (1) 0100000010
14099	1	0100010010 (1) 0101010010
14098	1	0100010010 (1) 0000010010
13495	1	1000110100 (1) 1000110000
13494	1	1000110100 (1) 1000111100
13493	1	1000110100 (1) 1001110100
13492	1	1000110100 (1) 1010110100
13394	1	0101100010 (1) 0101100000
13393	1	0101100010 (1) 0101110010
13392	1	0101100010 (1) 0001100010
13631	1	1111111000 (1) 1111111100
13630	1	1111111000 (1) 1110111000
13629	1	1111111000 (1) 1101111000
13628	1	1111111000 (1) 1011111000
13467	1	1100110100 (1) 1100110000
13466	1	1100110100 (1) 1100111100
13465	1	1100110100 (1) 1101110100
13464	1	1100110100 (1) 1110110100
13463	1	1100110100 (1) 1000110100
13627	1	0111111000 (1) 0111111100
13626	1	0111111000 (1) 0110111000
13625	1	0111111000 (1) 0101111000
13624	1	0111111000 (1) 0011111000
13454	1	0100110100 (1) 0100110000
13453	1	0100110100 (1) 0100111100
13452	1	0100110100 (1) 0101110100
13451	1	0100110100 (1) 0110110100
13450	1	0100110100 (1) 0000110100
13104	1	1101000001 (1) 1101000011
13103	1	1101000001 (1) 1101000101
13102	1	1101000001 (1) 1101100001
13089	1	0101000001 (1) 0101000011
13088	1	0101000001 (1) 0101000101
13087	1	0101000001 (1) 0101100001
13086	1	0101000001 (1) 0001000001
14080	1	1010010010 (1) 1010000010
14079	1	1010010010 (1) 1000010010
12880	1	1011100010 (1) 1011100000
12879	1	1011100010 (1) 1011110010
12878	1	1011100010 (1) 1011000010
12877	1	1011100010 (1) 1010100010
12876	1	1011100010 (1) 1111100010
14067	1	0010010010 (1) 0010000010
14066	1	0010010010 (1) 0000010010
12870	1	0011100010 (1) 0011100000
12869	1	0011100010 (1) 0011110010
12868	1	0011100010 (1) 0011000010
12867	1	0011100010 (1) 0010100010
13242	1	1111100010 (1) 1111100000
13241	1	1111100010 (1) 1111110010
13240	1	1111100010 (1) 1110100010
13239	1	1111100010 (1) 1101100010
14052	1	1110010010 (1) 1110000010
14051	1	1110010010 (1) 1100010010
14050	1	1110010010 (1) 1010010010
13449	1	1010110100 (1) 1010110000
13448	1	1010110100 (1) 1010111100
13018	1	1001001100 (1) 1001001110
13017	1	1001001100 (1) 1001001000
13016	1	1001001100 (1) 1001000100
13015	1	1001001100 (1) 1011001100
13014	1	1001001100 (1) 1101001100
14035	1	0110010010 (1) 0110000010
14034	1	0110010010 (1) 0100010010
14033	1	0110010010 (1) 0010010010
12803	1	0011000001 (1) 0011000011
12802	1	0011000001 (1) 0011000101
12801	1	0011000001 (1) 0010000001
12800	1	0011000001 (1) 0001000001
13447	1	0010110100 (1) 0010110000
13446	1	0010110100 (1) 0010111100
12995	1	0001001100 (1) 0001001110
12994	1	0001001100 (1) 0001001000
12993	1	0001001100 (1) 0001000100
12992	1	0001001100 (1) 0011001100
13224	1	0111100010 (1) 0111100000
13223	1	0111100010 (1) 0111110010
13222	1	0111100010 (1) 0110100010
13221	1	0111100010 (1) 0101100010
13220	1	0111100010 (1) 0011100010
12782	1	1011000001 (1) 1011000011
12781	1	1011000001 (1) 1011000101
12780	1	1011000001 (1) 1010000001
12779	1	1011000001 (1) 1001000001
12778	1	1011000001 (1) 1111000001
13445	1	1110110100 (1) 1110110000
13444	1	1110110100 (1) 1110111100
13443	1	1110110100 (1) 1010110100
12953	1	1101001100 (1) 1101001110
12952	1	1101001100 (1) 1101001000
12951	1	1101001100 (1) 1101000100
12950	1	1101001100 (1) 1101101100
12949	1	1101001100 (1) 1111001100
13430	1	0110110100 (1) 0110110000
13429	1	0110110100 (1) 0110111100
13428	1	0110110100 (1) 0010110100
12932	1	0101001100 (1) 0101001110
12931	1	0101001100 (1) 0101001000
12930	1	0101001100 (1) 0101000100
12929	1	0101001100 (1) 0101101100
12928	1	0101001100 (1) 0111001100
12927	1	0101001100 (1) 0001001100
12769	1	1111000001 (1) 1111000011
12768	1	1111000001 (1) 1111000101
12767	1	1111000001 (1) 1111100001
12766	1	1111000001 (1) 1110000001
12765	1	1111000001 (1) 1101000001
12724	1	0111000001 (1) 0111000011
12723	1	0111000001 (1) 0111000101
12722	1	0111000001 (1) 0111100001
12721	1	0111000001 (1) 0110000001
12720	1	0111000001 (1) 0101000001
12719	1	0111000001 (1) 0011000001
12704	1	0000100001 (1) 0000100101
12703	1	0000100001 (1) 0000110001
12702	1	0000100001 (1) 0000000001
12701	1	0000100001 (1) 0001100001
12700	1	0000100001 (1) 0010100001
12684	1	1000100001 (1) 1000100101
12683	1	1000100001 (1) 1000110001
12682	1	1000100001 (1) 1000000001
12681	1	1000100001 (1) 1001100001
12680	1	1000100001 (1) 1010100001
12679	1	1000100001 (1) 1100100001
14027	1	1001010010 (1) 1001000010
12808	1	1011001100 (1) 1011001110
12807	1	1011001100 (1) 1011001000
12806	1	1011001100 (1) 1011000100
12805	1	1011001100 (1) 1010001100
12804	1	1011001100 (1) 1111001100
14023	1	0001010010 (1) 0001000010
12790	1	0011001100 (1) 0011001110
12789	1	0011001100 (1) 0011001000
12788	1	0011001100 (1) 0011000100
12787	1	0011001100 (1) 0010001100
12660	1	1100100001 (1) 1100100101
12659	1	1100100001 (1) 1100110001
12658	1	1100100001 (1) 1100000001
12657	1	1100100001 (1) 1101100001
12641	1	0100100001 (1) 0100100101
12640	1	0100100001 (1) 0100110001
12639	1	0100100001 (1) 0100000001
12638	1	0100100001 (1) 0101100001
12637	1	0100100001 (1) 0000100001
14019	1	1101010010 (1) 1101000010
14018	1	1101010010 (1) 1101110010
14017	1	1101010010 (1) 1001010010
13405	1	1001110100 (1) 1001110000
13404	1	1001110100 (1) 1001111100
13403	1	1001110100 (1) 1011110100
12756	1	1111001100 (1) 1111001110
12755	1	1111001100 (1) 1111001000
12754	1	1111001100 (1) 1111000100
12753	1	1111001100 (1) 1111101100
12752	1	1111001100 (1) 1110001100
14011	1	0101010010 (1) 0101000010
14010	1	0101010010 (1) 0101110010
14009	1	0101010010 (1) 0001010010
13391	1	0001110100 (1) 0001110000
13390	1	0001110100 (1) 0001111100
13389	1	0001110100 (1) 0011110100
12741	1	0111001100 (1) 0111001110
12740	1	0111001100 (1) 0111001000
12739	1	0111001100 (1) 0111000100
12738	1	0111001100 (1) 0111101100
12737	1	0111001100 (1) 0110001100
12736	1	0111001100 (1) 0011001100
13334	1	1101110100 (1) 1101110000
13333	1	1101110100 (1) 1101111100
13332	1	1101110100 (1) 1111110100
13331	1	1101110100 (1) 1001110100
13999	1	1000001010 (1) 1000000010
13998	1	1000001010 (1) 1001001010
13997	1	1000001010 (1) 1100001010
13987	1	0000001010 (1) 0000000010
13986	1	0000001010 (1) 0001001010
13330	1	0101110100 (1) 0101110000
13329	1	0101110100 (1) 0101111100
13328	1	0101110100 (1) 0111110100
13327	1	0101110100 (1) 0001110100
13983	1	1100001010 (1) 1100000010
13982	1	1100001010 (1) 1101001010
13974	1	0100001010 (1) 0100000010
13973	1	0100001010 (1) 0101001010
13972	1	0100001010 (1) 0000001010
12609	1	0000101100 (1) 0000101000
12608	1	0000101100 (1) 0000100100
12607	1	0000101100 (1) 0000111100
12606	1	0000101100 (1) 0000001100
12605	1	0000101100 (1) 0001101100
12604	1	0000101100 (1) 0010101100
12594	1	1000101100 (1) 1000101000
12593	1	1000101100 (1) 1000100100
12592	1	1000101100 (1) 1000111100
12591	1	1000101100 (1) 1000001100
12590	1	1000101100 (1) 1001101100
12589	1	1000101100 (1) 1010101100
12588	1	1000101100 (1) 1100101100
12687	1	0010100001 (1) 0010100101
12686	1	0010100001 (1) 0010110001
12685	1	0010100001 (1) 0010000001
12664	1	1010100001 (1) 1010100101
12663	1	1010100001 (1) 1010110001
12662	1	1010100001 (1) 1010000001
12661	1	1010100001 (1) 1110100001
13962	1	1011010010 (1) 1011000010
13961	1	1011010010 (1) 1010010010
13960	1	1011010010 (1) 1001010010
13949	1	0011010010 (1) 0011000010
13948	1	0011010010 (1) 0010010010
13947	1	0011010010 (1) 0001010010
12576	1	1100101100 (1) 1100101000
12575	1	1100101100 (1) 1100100100
12574	1	1100101100 (1) 1100111100
12573	1	1100101100 (1) 1100001100
12572	1	1100101100 (1) 1101101100
12571	1	1100101100 (1) 1110101100
12553	1	0100101100 (1) 0100101000
12552	1	0100101100 (1) 0100100100
12551	1	0100101100 (1) 0100111100
12550	1	0100101100 (1) 0100001100
12549	1	0100101100 (1) 0101101100
12548	1	0100101100 (1) 0110101100
12547	1	0100101100 (1) 0000101100
12561	1	1110100001 (1) 1110100101
12560	1	1110100001 (1) 1110110001
12559	1	1110100001 (1) 1110000001
12558	1	1110100001 (1) 1100100001
12535	1	0110100001 (1) 0110100101
12534	1	0110100001 (1) 0110110001
12533	1	0110100001 (1) 0110000001
12532	1	0110100001 (1) 0100100001
12531	1	0110100001 (1) 0010100001
13234	1	1011110100 (1) 1011110000
13233	1	1011110100 (1) 1011111100
13232	1	1011110100 (1) 1010110100
13915	1	1111010010 (1) 1111000010
13914	1	1111010010 (1) 1111110010
13913	1	1111010010 (1) 1110010010
13912	1	1111010010 (1) 1101010010
13911	1	1111010010 (1) 1011010010
13231	1	0011110100 (1) 0011110000
13230	1	0011110100 (1) 0011111100
13229	1	0011110100 (1) 0010110100
13934	1	0111010010 (1) 0111000010
13933	1	0111010010 (1) 0111110010
13932	1	0111010010 (1) 0110010010
13931	1	0111010010 (1) 0101010010
13930	1	0111010010 (1) 0011010010
13213	1	1111110100 (1) 1111110000
13212	1	1111110100 (1) 1111111100
13211	1	1111110100 (1) 1110110100
13210	1	1111110100 (1) 1011110100
13899	1	1010001010 (1) 1010000010
13898	1	1010001010 (1) 1000001010
13897	1	1010001010 (1) 1110001010
13890	1	0010001010 (1) 0010000010
13889	1	0010001010 (1) 0000001010
13209	1	0111110100 (1) 0111110000
13208	1	0111110100 (1) 0111111100
13207	1	0111110100 (1) 0110110100
13206	1	0111110100 (1) 0011110100
13884	1	1110001010 (1) 1110000010
13883	1	1110001010 (1) 1100001010
13191	1	1000110010 (1) 1000110000
13190	1	1000110010 (1) 1000010010
13189	1	1000110010 (1) 1001110010
13188	1	1000110010 (1) 1010110010
13169	1	0000110010 (1) 0000110000
13168	1	0000110010 (1) 0000010010
13167	1	0000110010 (1) 0001110010
13166	1	0000110010 (1) 0010110010
13874	1	0110001010 (1) 0110000010
13873	1	0110001010 (1) 0100001010
13872	1	0110001010 (1) 0010001010
12598	1	0010101100 (1) 0010101000
12597	1	0010101100 (1) 0010100100
12596	1	0010101100 (1) 0010111100
12595	1	0010101100 (1) 0010001100
12581	1	1010101100 (1) 1010101000
12580	1	1010101100 (1) 1010100100
12579	1	1010101100 (1) 1010111100
12578	1	1010101100 (1) 1010001100
12577	1	1010101100 (1) 1110101100
13157	1	1100110010 (1) 1100110000
13156	1	1100110010 (1) 1100010010
13155	1	1100110010 (1) 1101110010
13154	1	1100110010 (1) 1000110010
12557	1	1110101100 (1) 1110101000
12556	1	1110101100 (1) 1110100100
12555	1	1110101100 (1) 1110111100
12554	1	1110101100 (1) 1110001100
13147	1	0100110010 (1) 0100110000
13146	1	0100110010 (1) 0100010010
13145	1	0100110010 (1) 0101110010
13144	1	0100110010 (1) 0000110010
12546	1	0110101100 (1) 0110101000
12545	1	0110101100 (1) 0110100100
12544	1	0110101100 (1) 0110111100
12543	1	0110101100 (1) 0110001100
12542	1	0110101100 (1) 0010101100
12523	1	1000010001 (1) 1000010011
12522	1	1000010001 (1) 1000010101
12521	1	1000010001 (1) 1000011001
12520	1	1000010001 (1) 1000000001
12519	1	1000010001 (1) 1001010001
12501	1	0000010001 (1) 0000010011
12500	1	0000010001 (1) 0000010101
12499	1	0000010001 (1) 0000011001
12498	1	0000010001 (1) 0000000001
12497	1	0000010001 (1) 0001010001
12691	1	0001100001 (1) 0001100101
12690	1	0001100001 (1) 0001110001
12689	1	0001100001 (1) 0001000001
12688	1	0001100001 (1) 0011100001
12669	1	1001100001 (1) 1001100101
12668	1	1001100001 (1) 1001110001
12667	1	1001100001 (1) 1001000001
12666	1	1001100001 (1) 1011100001
12665	1	1001100001 (1) 1101100001
12834	1	1101100001 (1) 1101100101
12833	1	1101100001 (1) 1101110001
12452	1	1100010001 (1) 1100010011
12451	1	1100010001 (1) 1100010101
12450	1	1100010001 (1) 1100011001
12449	1	1100010001 (1) 1100000001
12448	1	1100010001 (1) 1101010001
12447	1	1100010001 (1) 1000010001
12825	1	0101100001 (1) 0101100101
12824	1	0101100001 (1) 0101110001
12823	1	0101100001 (1) 0001100001
12418	1	0100010001 (1) 0100010011
12417	1	0100010001 (1) 0100010101
12416	1	0100010001 (1) 0100011001
12415	1	0100010001 (1) 0100000001
12414	1	0100010001 (1) 0101010001
12413	1	0100010001 (1) 0000010001
13065	1	1010110010 (1) 1010110000
13064	1	1010110010 (1) 1010010010
13861	1	1001001010 (1) 1001000010
13860	1	1001001010 (1) 1101001010
13059	1	0010110010 (1) 0010110000
13058	1	0010110010 (1) 0010010010
13857	1	0001001010 (1) 0001000010
12983	1	0110110010 (1) 0110110000
12982	1	0110110010 (1) 0110010010
12981	1	0110110010 (1) 0100110010
12980	1	0110110010 (1) 0010110010
13033	1	1110110010 (1) 1110110000
13032	1	1110110010 (1) 1110010010
13031	1	1110110010 (1) 1100110010
13030	1	1110110010 (1) 1010110010
13556	1	0000011100 (1) 0000011110
13555	1	0000011100 (1) 0000001100
13554	1	0000011100 (1) 0001011100
13553	1	0000011100 (1) 0010011100
13852	1	1101001010 (1) 1101000010
13851	1	1101001010 (1) 1101101010
13564	1	1000011100 (1) 1000011110
13563	1	1000011100 (1) 1000001100
13562	1	1000011100 (1) 1001011100
13561	1	1000011100 (1) 1010011100
12587	1	1001101100 (1) 1001101000
12586	1	1001101100 (1) 1001100100
12585	1	1001101100 (1) 1001111100
12584	1	1001101100 (1) 1001001100
12583	1	1001101100 (1) 1011101100
12582	1	1001101100 (1) 1101101100
12473	1	0011100001 (1) 0011100101
12472	1	0011100001 (1) 0011110001
12471	1	0011100001 (1) 0011000001
12470	1	0011100001 (1) 0010100001
13844	1	0101001010 (1) 0101000010
13843	1	0101001010 (1) 0101101010
13842	1	0101001010 (1) 0001001010
12363	1	0010010001 (1) 0010010011
12362	1	0010010001 (1) 0010010101
12361	1	0010010001 (1) 0010011001
12360	1	0010010001 (1) 0010000001
12359	1	0010010001 (1) 0000010001
12462	1	1011100001 (1) 1011100101
12461	1	1011100001 (1) 1011110001
12460	1	1011100001 (1) 1011000001
12459	1	1011100001 (1) 1010100001
12458	1	1011100001 (1) 1111100001
12340	1	1010010001 (1) 1010010011
12339	1	1010010001 (1) 1010010101
12338	1	1010010001 (1) 1010011001
12337	1	1010010001 (1) 1010000001
12336	1	1010010001 (1) 1000010001
12603	1	0001101100 (1) 0001101000
12602	1	0001101100 (1) 0001100100
12601	1	0001101100 (1) 0001111100
12600	1	0001101100 (1) 0001001100
12599	1	0001101100 (1) 0011101100
13538	1	1100011100 (1) 1100011110
13537	1	1100011100 (1) 1100001100
13536	1	1100011100 (1) 1101011100
13535	1	1100011100 (1) 1110011100
13534	1	1100011100 (1) 1000011100
12760	1	1101101100 (1) 1101101000
12759	1	1101101100 (1) 1101100100
12758	1	1101101100 (1) 1101111100
12757	1	1101101100 (1) 1111101100
13514	1	0100011100 (1) 0100011110
13513	1	0100011100 (1) 0100001100
13512	1	0100011100 (1) 0101011100
13511	1	0100011100 (1) 0110011100
13510	1	0100011100 (1) 0000011100
12746	1	0101101100 (1) 0101101000
12745	1	0101101100 (1) 0101100100
12744	1	0101101100 (1) 0101111100
12743	1	0101101100 (1) 0111101100
12742	1	0101101100 (1) 0001101100
12728	1	1111100001 (1) 1111100101
12727	1	1111100001 (1) 1111110001
12726	1	1111100001 (1) 1110100001
12725	1	1111100001 (1) 1101100001
12302	1	1110010001 (1) 1110010011
12301	1	1110010001 (1) 1110010101
12300	1	1110010001 (1) 1110011001
12299	1	1110010001 (1) 1110000001
12298	1	1110010001 (1) 1100010001
12297	1	1110010001 (1) 1010010001
12709	1	0111100001 (1) 0111100101
12708	1	0111100001 (1) 0111110001
12707	1	0111100001 (1) 0110100001
12706	1	0111100001 (1) 0101100001
12705	1	0111100001 (1) 0011100001
12274	1	0110010001 (1) 0110010011
12273	1	0110010001 (1) 0110010101
12272	1	0110010001 (1) 0110011001
12271	1	0110010001 (1) 0110000001
12270	1	0110010001 (1) 0100010001
12269	1	0110010001 (1) 0010010001
13832	1	1000000110 (1) 1000000010
13831	1	1000000110 (1) 1000100110
13830	1	1000000110 (1) 1001000110
13829	1	1000000110 (1) 1010000110
13828	1	1000000110 (1) 1100000110
13803	1	1011001010 (1) 1011000010
13802	1	1011001010 (1) 1010001010
13801	1	1011001010 (1) 1001001010
13800	1	1011001010 (1) 1111001010
13789	1	0000000110 (1) 0000000010
13788	1	0000000110 (1) 0000100110
13787	1	0000000110 (1) 0001000110
13786	1	0000000110 (1) 0010000110
13770	1	0011001010 (1) 0011000010
13769	1	0011001010 (1) 0010001010
13768	1	0011001010 (1) 0001001010
13487	1	1010011100 (1) 1010011110
13486	1	1010011100 (1) 1010001100
12883	1	1001110010 (1) 1001110000
12882	1	1001110010 (1) 1001010010
12881	1	1001110010 (1) 1011110010
13764	1	1100000110 (1) 1100000010
13763	1	1100000110 (1) 1100100110
13762	1	1100000110 (1) 1101000110
13761	1	1100000110 (1) 1110000110
13749	1	1111001010 (1) 1111000010
13748	1	1111001010 (1) 1111101010
13747	1	1111001010 (1) 1110001010
13746	1	1111001010 (1) 1101001010
12873	1	0001110010 (1) 0001110000
12872	1	0001110010 (1) 0001010010
12871	1	0001110010 (1) 0011110010
13481	1	0010011100 (1) 0010011110
13480	1	0010011100 (1) 0010001100
12379	1	1011101100 (1) 1011101000
12378	1	1011101100 (1) 1011100100
12377	1	1011101100 (1) 1011111100
12376	1	1011101100 (1) 1011001100
12375	1	1011101100 (1) 1010101100
12374	1	1011101100 (1) 1111101100
13707	1	0111001010 (1) 0111000010
13706	1	0111001010 (1) 0111101010
13705	1	0111001010 (1) 0110001010
13704	1	0111001010 (1) 0101001010
13703	1	0111001010 (1) 0011001010
13732	1	0100000110 (1) 0100000010
13731	1	0100000110 (1) 0100100110
13730	1	0100000110 (1) 0101000110
13729	1	0100000110 (1) 0110000110
13728	1	0100000110 (1) 0000000110
12324	1	0011101100 (1) 0011101000
12323	1	0011101100 (1) 0011100100
12322	1	0011101100 (1) 0011111100
12321	1	0011101100 (1) 0011001100
12320	1	0011101100 (1) 0010101100
13470	1	1110011100 (1) 1110011110
13469	1	1110011100 (1) 1110001100
13468	1	1110011100 (1) 1010011100
12866	1	1101110010 (1) 1101110000
12865	1	1101110010 (1) 1001110010
12623	1	1111101100 (1) 1111101000
12622	1	1111101100 (1) 1111100100
12621	1	1111101100 (1) 1111111100
12620	1	1111101100 (1) 1110101100
13457	1	0110011100 (1) 0110011110
13456	1	0110011100 (1) 0110001100
13455	1	0110011100 (1) 0010011100
12845	1	0101110010 (1) 0101110000
12844	1	0101110010 (1) 0001110010
12614	1	0111101100 (1) 0111101000
12613	1	0111101100 (1) 0111100100
12612	1	0111101100 (1) 0111111100
12611	1	0111101100 (1) 0110101100
12610	1	0111101100 (1) 0011101100
12505	1	1001010001 (1) 1001010011
12504	1	1001010001 (1) 1001010101
12503	1	1001010001 (1) 1001011001
12502	1	1001010001 (1) 1001000001
12483	1	0001010001 (1) 0001010011
12482	1	0001010001 (1) 0001010101
12481	1	0001010001 (1) 0001011001
12480	1	0001010001 (1) 0001000001
12191	1	0000101010 (1) 0000101000
12190	1	0000101010 (1) 0000100010
12189	1	0000101010 (1) 0000111010
12188	1	0000101010 (1) 0000001010
12187	1	0000101010 (1) 0001101010
12186	1	0000101010 (1) 0010101010
12170	1	1000101010 (1) 1000101000
12169	1	1000101010 (1) 1000100010
12168	1	1000101010 (1) 1000111010
12167	1	1000101010 (1) 1000001010
12166	1	1000101010 (1) 1001101010
12165	1	1000101010 (1) 1010101010
12164	1	1000101010 (1) 1100101010
12430	1	1101010001 (1) 1101010011
12429	1	1101010001 (1) 1101010101
12428	1	1101010001 (1) 1101011001
12427	1	1101010001 (1) 1101000001
12426	1	1101010001 (1) 1101110001
12425	1	1101010001 (1) 1001010001
12396	1	0101010001 (1) 0101010011
12395	1	0101010001 (1) 0101010101
12394	1	0101010001 (1) 0101011001
12393	1	0101010001 (1) 0101000001
12392	1	0101010001 (1) 0101110001
12391	1	0101010001 (1) 0001010001
13662	1	1010000110 (1) 1010000010
13661	1	1010000110 (1) 1010100110
13660	1	1010000110 (1) 1110000110
12146	1	1100101010 (1) 1100101000
12145	1	1100101010 (1) 1100100010
12144	1	1100101010 (1) 1100111010
12143	1	1100101010 (1) 1100001010
12142	1	1100101010 (1) 1101101010
13656	1	0010000110 (1) 0010000010
13655	1	0010000110 (1) 0010100110
12098	1	0100101010 (1) 0100101000
12097	1	0100101010 (1) 0100100010
12096	1	0100101010 (1) 0100111010
12095	1	0100101010 (1) 0100001010
12094	1	0100101010 (1) 0101101010
12093	1	0100101010 (1) 0000101010
12086	1	1000001001 (1) 1000001011
12085	1	1000001001 (1) 1000001101
12084	1	1000001001 (1) 1000000001
12083	1	1000001001 (1) 1001001001
12082	1	1000001001 (1) 1100001001
12064	1	0000001001 (1) 0000001011
12063	1	0000001001 (1) 0000001101
12062	1	0000001001 (1) 0000000001
12061	1	0000001001 (1) 0001001001
13644	1	1110000110 (1) 1110000010
13643	1	1110000110 (1) 1110100110
12822	1	1011110010 (1) 1011110000
12821	1	1011110010 (1) 1011010010
12820	1	1011110010 (1) 1010110010
12819	1	0011110010 (1) 0011110000
12818	1	0011110010 (1) 0011010010
12817	1	0011110010 (1) 0010110010
13637	1	0110000110 (1) 0110000010
13636	1	0110000110 (1) 0110100110
13635	1	0110000110 (1) 0010000110
12068	1	1100001001 (1) 1100001011
12067	1	1100001001 (1) 1100001101
12066	1	1100001001 (1) 1100000001
12065	1	1100001001 (1) 1101001001
12032	1	0100001001 (1) 0100001011
12031	1	0100001001 (1) 0100001101
12030	1	0100001001 (1) 0100000001
12029	1	0100001001 (1) 0101001001
12028	1	0100001001 (1) 0000001001
13439	1	1001011100 (1) 1001011110
13438	1	1001011100 (1) 1001001100
13437	1	1001011100 (1) 1011011100
12816	1	1111110010 (1) 1111110000
12815	1	1111110010 (1) 1110110010
12814	1	1111110010 (1) 1101110010
12813	1	1111110010 (1) 1011110010
13433	1	0001011100 (1) 0001011110
13432	1	0001011100 (1) 0001001100
13431	1	0001011100 (1) 0011011100
12786	1	0111110010 (1) 0111110000
12785	1	0111110010 (1) 0110110010
12784	1	0111110010 (1) 0101110010
12783	1	0111110010 (1) 0011110010
12007	1	1011010001 (1) 1011010011
12006	1	1011010001 (1) 1011010101
12005	1	1011010001 (1) 1011011001
12004	1	1011010001 (1) 1011000001
12003	1	1011010001 (1) 1010010001
12002	1	1011010001 (1) 1001010001
11987	1	0011010001 (1) 0011010011
11986	1	0011010001 (1) 0011010101
11985	1	0011010001 (1) 0011011001
11984	1	0011010001 (1) 0011000001
11983	1	0011010001 (1) 0010010001
11982	1	0011010001 (1) 0001010001
13422	1	1101011100 (1) 1101011110
13421	1	1101011100 (1) 1101001100
13420	1	1101011100 (1) 1101111100
13419	1	1101011100 (1) 1111011100
13418	1	1101011100 (1) 1001011100
12174	1	0010101010 (1) 0010101000
12173	1	0010101010 (1) 0010100010
12172	1	0010101010 (1) 0010111010
12171	1	0010101010 (1) 0010001010
13412	1	0101011100 (1) 0101011110
13411	1	0101011100 (1) 0101001100
13410	1	0101011100 (1) 0101111100
13409	1	0101011100 (1) 0111011100
13408	1	0101011100 (1) 0001011100
12151	1	1010101010 (1) 1010101000
12150	1	1010101010 (1) 1010100010
12149	1	1010101010 (1) 1010111010
12148	1	1010101010 (1) 1010001010
12147	1	1010101010 (1) 1110101010
11944	1	0111010001 (1) 0111010011
11943	1	0111010001 (1) 0111010101
11942	1	0111010001 (1) 0111011001
11941	1	0111010001 (1) 0111000001
11940	1	0111010001 (1) 0111110001
11939	1	0111010001 (1) 0110010001
11938	1	0111010001 (1) 0101010001
11937	1	0111010001 (1) 0011010001
11917	1	1111010001 (1) 1111010011
11916	1	1111010001 (1) 1111010101
11915	1	1111010001 (1) 1111011001
11914	1	1111010001 (1) 1111000001
11913	1	1111010001 (1) 1111110001
11912	1	1111010001 (1) 1110010001
11911	1	1111010001 (1) 1101010001
11910	1	1111010001 (1) 1011010001
11949	1	1110101010 (1) 1110101000
11948	1	1110101010 (1) 1110100010
11947	1	1110101010 (1) 1110111010
11946	1	1110101010 (1) 1110001010
11945	1	1110101010 (1) 1100101010
11884	1	0110101010 (1) 0110101000
11883	1	0110101010 (1) 0110100010
11882	1	0110101010 (1) 0110111010
11881	1	0110101010 (1) 0110001010
11880	1	0110101010 (1) 0100101010
11879	1	0110101010 (1) 0010101010
11872	1	1010001001 (1) 1010001011
11871	1	1010001001 (1) 1010001101
11870	1	1010001001 (1) 1010000001
11869	1	1010001001 (1) 1000001001
11868	1	1010001001 (1) 1110001001
11856	1	0010001001 (1) 0010001011
11855	1	0010001001 (1) 0010001101
11854	1	0010001001 (1) 0010000001
11853	1	0010001001 (1) 0000001001
13614	1	1001000110 (1) 1001000010
13613	1	1001000110 (1) 1001100110
13612	1	1001000110 (1) 1011000110
13611	1	1001000110 (1) 1101000110
13601	1	0001000110 (1) 0001000010
13600	1	0001000110 (1) 0001100110
13599	1	0001000110 (1) 0011000110
11860	1	1110001001 (1) 1110001011
11859	1	1110001001 (1) 1110001101
11858	1	1110001001 (1) 1110000001
11857	1	1110001001 (1) 1100001001
12674	1	1000110001 (1) 1000110101
12673	1	1000110001 (1) 1000111001
12672	1	1000110001 (1) 1000010001
12671	1	1000110001 (1) 1001110001
12670	1	1000110001 (1) 1010110001
11826	1	0110001001 (1) 0110001011
11825	1	0110001001 (1) 0110001101
11824	1	0110001001 (1) 0110000001
11823	1	0110001001 (1) 0100001001
11822	1	0110001001 (1) 0010001001
12696	1	0000110001 (1) 0000110101
12695	1	0000110001 (1) 0000111001
12694	1	0000110001 (1) 0000010001
12693	1	0000110001 (1) 0001110001
12692	1	0000110001 (1) 0010110001
13397	1	1011011100 (1) 1011011110
13396	1	1011011100 (1) 1011001100
13395	1	1011011100 (1) 1010011100
13591	1	1101000110 (1) 1101000010
13590	1	1101000110 (1) 1101100110
13589	1	1101000110 (1) 1111000110
13383	1	0011011100 (1) 0011011110
13382	1	0011011100 (1) 0011001100
13381	1	0011011100 (1) 0010011100
13581	1	0101000110 (1) 0101000010
13580	1	0101000110 (1) 0101100110
13579	1	0101000110 (1) 0111000110
13578	1	0101000110 (1) 0001000110
12646	1	1100110001 (1) 1100110101
12645	1	1100110001 (1) 1100111001
12644	1	1100110001 (1) 1100010001
12643	1	1100110001 (1) 1101110001
12642	1	1100110001 (1) 1000110001
12632	1	0100110001 (1) 0100110101
12631	1	0100110001 (1) 0100111001
12630	1	0100110001 (1) 0100010001
12629	1	0100110001 (1) 0101110001
12628	1	0100110001 (1) 0000110001
13307	1	1111011100 (1) 1111011110
13306	1	1111011100 (1) 1111001100
13305	1	1111011100 (1) 1111111100
13304	1	1111011100 (1) 1110011100
13303	1	1111011100 (1) 1011011100
13319	1	0111011100 (1) 0111011110
13318	1	0111011100 (1) 0111001100
13317	1	0111011100 (1) 0111111100
13316	1	0111011100 (1) 0110011100
13315	1	0111011100 (1) 0011011100
13568	1	1000011010 (1) 1000011110
13567	1	1000011010 (1) 1000010010
13566	1	1000011010 (1) 1000001010
13565	1	1000011010 (1) 1001011010
13560	1	0000011010 (1) 0000011110
13559	1	0000011010 (1) 0000010010
13558	1	0000011010 (1) 0000001010
13557	1	0000011010 (1) 0001011010
12179	1	0001101010 (1) 0001101000
12178	1	0001101010 (1) 0001100010
12177	1	0001101010 (1) 0001111010
12176	1	0001101010 (1) 0001001010
12175	1	0001101010 (1) 0011101010
12157	1	1001101010 (1) 1001101000
12156	1	1001101010 (1) 1001100010
12155	1	1001101010 (1) 1001111010
12154	1	1001101010 (1) 1001001010
12153	1	1001101010 (1) 1011101010
12152	1	1001101010 (1) 1101101010
12386	1	1101101010 (1) 1101101000
12385	1	1101101010 (1) 1101100010
12384	1	1101101010 (1) 1101111010
13543	1	1100011010 (1) 1100011110
13542	1	1100011010 (1) 1100010010
13541	1	1100011010 (1) 1100001010
13540	1	1100011010 (1) 1101011010
13539	1	1100011010 (1) 1000011010
12569	1	0010110001 (1) 0010110101
12568	1	0010110001 (1) 0010111001
12567	1	0010110001 (1) 0010010001
12072	1	1001001001 (1) 1001001011
12071	1	1001001001 (1) 1001001101
12070	1	1001001001 (1) 1001000001
12069	1	1001001001 (1) 1101001001
13248	1	1000111100 (1) 1000011100
13247	1	1000111100 (1) 1001111100
13246	1	1000111100 (1) 1010111100
13533	1	1011000110 (1) 1011000010
13532	1	1011000110 (1) 1011100110
13531	1	1011000110 (1) 1010000110
13530	1	1011000110 (1) 1111000110
12053	1	0001001001 (1) 0001001011
12052	1	0001001001 (1) 0001001101
12051	1	0001001001 (1) 0001000001
12564	1	1010110001 (1) 1010110101
12563	1	1010110001 (1) 1010111001
12562	1	1010110001 (1) 1010010001
13525	1	0011000110 (1) 0011000010
13524	1	0011000110 (1) 0011100110
13523	1	0011000110 (1) 0010000110
13245	1	0000111100 (1) 0000011100
13244	1	0000111100 (1) 0001111100
13243	1	0000111100 (1) 0010111100
12367	1	0101101010 (1) 0101101000
12366	1	0101101010 (1) 0101100010
12365	1	0101101010 (1) 0101111010
12364	1	0101101010 (1) 0001101010
13519	1	0100011010 (1) 0100011110
13518	1	0100011010 (1) 0100010010
13517	1	0100011010 (1) 0100001010
13516	1	0100011010 (1) 0101011010
13515	1	0100011010 (1) 0000011010
13238	1	1100111100 (1) 1100011100
13237	1	1100111100 (1) 1101111100
13236	1	1100111100 (1) 1110111100
13235	1	1100111100 (1) 1000111100
13509	1	1111000110 (1) 1111000010
13508	1	1111000110 (1) 1111100110
13507	1	1111000110 (1) 1110000110
13228	1	0100111100 (1) 0100011100
13227	1	0100111100 (1) 0101111100
13226	1	0100111100 (1) 0110111100
13225	1	0100111100 (1) 0000111100
13503	1	0111000110 (1) 0111000010
13502	1	0111000110 (1) 0111100110
13501	1	0111000110 (1) 0110000110
13500	1	0111000110 (1) 0011000110
12036	1	1101001001 (1) 1101001011
12035	1	1101001001 (1) 1101001101
12034	1	1101001001 (1) 1101000001
12033	1	1101001001 (1) 1101101001
12540	1	1110110001 (1) 1110110101
12539	1	1110110001 (1) 1110111001
12538	1	1110110001 (1) 1110010001
12537	1	1110110001 (1) 1100110001
12536	1	1110110001 (1) 1010110001
12018	1	0101001001 (1) 0101001011
12017	1	0101001001 (1) 0101001101
12016	1	0101001001 (1) 0101000001
12015	1	0101001001 (1) 0101101001
12014	1	0101001001 (1) 0001001001
12528	1	0110110001 (1) 0110110101
12527	1	0110110001 (1) 0110111001
12526	1	0110110001 (1) 0110010001
12525	1	0110110001 (1) 0100110001
12524	1	0110110001 (1) 0010110001
12254	1	1000100110 (1) 1000100100
12253	1	1000100110 (1) 1000100010
12252	1	1000100110 (1) 1000110110
12251	1	1000100110 (1) 1001100110
12250	1	1000100110 (1) 1010100110
12249	1	1000100110 (1) 1100100110
13491	1	1010011010 (1) 1010011110
13490	1	1010011010 (1) 1010010010
13489	1	1010011010 (1) 1010001010
13488	1	1010011010 (1) 1000011010
13485	1	0010011010 (1) 0010011110
13484	1	0010011010 (1) 0010010010
13483	1	0010011010 (1) 0010001010
13482	1	0010011010 (1) 0000011010
12248	1	0000100110 (1) 0000100100
12247	1	0000100110 (1) 0000100010
12246	1	0000100110 (1) 0000110110
12245	1	0000100110 (1) 0001100110
12244	1	0000100110 (1) 0010100110
11761	1	0011101010 (1) 0011101000
11760	1	0011101010 (1) 0011100010
11759	1	0011101010 (1) 0011111010
11758	1	0011101010 (1) 0011001010
11757	1	0011101010 (1) 0010101010
11751	1	1011101010 (1) 1011101000
11750	1	1011101010 (1) 1011100010
11749	1	1011101010 (1) 1011111010
11748	1	1011101010 (1) 1011001010
11747	1	1011101010 (1) 1010101010
11746	1	1011101010 (1) 1111101010
12241	1	1100100110 (1) 1100100100
12240	1	1100100110 (1) 1100100010
12239	1	1100100110 (1) 1100110110
12238	1	1100100110 (1) 1101100110
12237	1	1100100110 (1) 1110100110
13475	1	1110011010 (1) 1110011110
13474	1	1110011010 (1) 1110010010
13473	1	1110011010 (1) 1110001010
13472	1	1110011010 (1) 1100011010
13471	1	1110011010 (1) 1010011010
13158	1	1010111100 (1) 1010011100
12236	1	1111101010 (1) 1111101000
12235	1	1111101010 (1) 1111100010
12234	1	1111101010 (1) 1111111010
12233	1	1111101010 (1) 1110101010
12232	1	1111101010 (1) 1101101010
13125	1	1000000101 (1) 1000000111
13124	1	1000000101 (1) 1000100101
13123	1	1000000101 (1) 1001000101
13122	1	1000000101 (1) 1010000101
13121	1	1000000101 (1) 1100000101
11633	1	0011001001 (1) 0011001011
11632	1	0011001001 (1) 0011001101
11631	1	0011001001 (1) 0011000001
11630	1	0011001001 (1) 0010001001
11629	1	0011001001 (1) 0001001001
13153	1	0010111100 (1) 0010011100
12223	1	0100100110 (1) 0100100100
12222	1	0100100110 (1) 0100100010
12221	1	0100100110 (1) 0100110110
12220	1	0100100110 (1) 0101100110
12219	1	0100100110 (1) 0110100110
12218	1	0100100110 (1) 0000100110
13138	1	0000000101 (1) 0000000111
13137	1	0000000101 (1) 0000100101
13136	1	0000000101 (1) 0001000101
13135	1	0000000101 (1) 0010000101
11613	1	1011001001 (1) 1011001011
11612	1	1011001001 (1) 1011001101
11611	1	1011001001 (1) 1011000001
11610	1	1011001001 (1) 1010001001
11609	1	1011001001 (1) 1001001001
11608	1	1011001001 (1) 1111001001
13462	1	0110011010 (1) 0110011110
13461	1	0110011010 (1) 0110010010
13460	1	0110011010 (1) 0110001010
13459	1	0110011010 (1) 0100011010
13458	1	0110011010 (1) 0010011010
12229	1	0111101010 (1) 0111101000
12228	1	0111101010 (1) 0111100010
12227	1	0111101010 (1) 0111111010
12226	1	0111101010 (1) 0110101010
12225	1	0111101010 (1) 0101101010
12224	1	0111101010 (1) 0011101010
13114	1	1110111100 (1) 1110011100
13113	1	1110111100 (1) 1010111100
13112	1	0110111100 (1) 0110011100
13111	1	0110111100 (1) 0010111100
13108	1	1100000101 (1) 1100000111
13107	1	1100000101 (1) 1100100101
13106	1	1100000101 (1) 1101000101
13105	1	1100000101 (1) 1110000101
12466	1	1001110001 (1) 1001110101
12465	1	1001110001 (1) 1001111001
12464	1	1001110001 (1) 1001010001
12463	1	1001110001 (1) 1011110001
11598	1	1111001001 (1) 1111001011
11597	1	1111001001 (1) 1111001101
11596	1	1111001001 (1) 1111000001
11595	1	1111001001 (1) 1111101001
11594	1	1111001001 (1) 1110001001
11593	1	1111001001 (1) 1101001001
13094	1	0100000101 (1) 0100000111
13093	1	0100000101 (1) 0100100101
13092	1	0100000101 (1) 0101000101
13091	1	0100000101 (1) 0110000101
13090	1	0100000101 (1) 0000000101
12477	1	0001110001 (1) 0001110101
12476	1	0001110001 (1) 0001111001
12475	1	0001110001 (1) 0001010001
12474	1	0001110001 (1) 0011110001
11555	1	0111001001 (1) 0111001011
11554	1	0111001001 (1) 0111001101
11553	1	0111001001 (1) 0111000001
11552	1	0111001001 (1) 0111101001
11551	1	0111001001 (1) 0110001001
11550	1	0111001001 (1) 0101001001
11549	1	0111001001 (1) 0011001001
12455	1	1101110001 (1) 1101110101
12454	1	1101110001 (1) 1101111001
12453	1	1101110001 (1) 1001110001
12421	1	0101110001 (1) 0101110101
12420	1	0101110001 (1) 0101111001
12419	1	0101110001 (1) 0001110001
12111	1	1010100110 (1) 1010100100
12110	1	1010100110 (1) 1010100010
12109	1	1010100110 (1) 1010110110
12108	1	1010100110 (1) 1110100110
12101	1	0010100110 (1) 0010100100
12100	1	0010100110 (1) 0010100010
12099	1	0010100110 (1) 0010110110
11517	1	0000101001 (1) 0000101101
11516	1	0000101001 (1) 0000100001
11515	1	0000101001 (1) 0000111001
11514	1	0000101001 (1) 0000001001
11513	1	0000101001 (1) 0001101001
11512	1	0000101001 (1) 0010101001
11497	1	1000101001 (1) 1000101101
11496	1	1000101001 (1) 1000100001
11495	1	1000101001 (1) 1000111001
11494	1	1000101001 (1) 1000001001
11493	1	1000101001 (1) 1001101001
11492	1	1000101001 (1) 1010101001
11491	1	1000101001 (1) 1100101001
12050	1	1110100110 (1) 1110100100
12049	1	1110100110 (1) 1110100010
12048	1	1110100110 (1) 1110110110
13442	1	1001011010 (1) 1001011110
13441	1	1001011010 (1) 1001010010
13440	1	1001011010 (1) 1001001010
13436	1	0001011010 (1) 0001011110
13435	1	0001011010 (1) 0001010010
13434	1	0001011010 (1) 0001001010
12047	1	0110100110 (1) 0110100100
12046	1	0110100110 (1) 0110100010
12045	1	0110100110 (1) 0110110110
12044	1	0110100110 (1) 0010100110
12961	1	0010000101 (1) 0010000111
12960	1	0010000101 (1) 0010100101
12972	1	1010000101 (1) 1010000111
12971	1	1010000101 (1) 1010100101
12970	1	1010000101 (1) 1110000101
11473	1	1100101001 (1) 1100101101
11472	1	1100101001 (1) 1100100001
11471	1	1100101001 (1) 1100111001
11470	1	1100101001 (1) 1100001001
11469	1	1100101001 (1) 1101101001
11454	1	0100101001 (1) 0100101101
11453	1	0100101001 (1) 0100100001
11452	1	0100101001 (1) 0100111001
11451	1	0100101001 (1) 0100001001
11450	1	0100101001 (1) 0101101001
11449	1	0100101001 (1) 0000101001
12959	1	1001111100 (1) 1001011100
12958	1	1001111100 (1) 1011111100
13427	1	1101011010 (1) 1101011110
13426	1	1101011010 (1) 1101010010
13425	1	1101011010 (1) 1101001010
13424	1	1101011010 (1) 1101111010
13423	1	1101011010 (1) 1001011010
12945	1	0001111100 (1) 0001011100
12944	1	0001111100 (1) 0011111100
13417	1	0101011010 (1) 0101011110
13416	1	0101011010 (1) 0101010010
13415	1	0101011010 (1) 0101001010
13414	1	0101011010 (1) 0101111010
13413	1	0101011010 (1) 0001011010
12920	1	1110000101 (1) 1110000111
12919	1	1110000101 (1) 1110100101
12344	1	1011110001 (1) 1011110101
12343	1	1011110001 (1) 1011111001
12342	1	1011110001 (1) 1011010001
12341	1	1011110001 (1) 1010110001
12911	1	0110000101 (1) 0110000111
12910	1	0110000101 (1) 0110100101
12909	1	0110000101 (1) 0010000101
12371	1	0011110001 (1) 0011110101
12370	1	0011110001 (1) 0011111001
12369	1	0011110001 (1) 0011010001
12368	1	0011110001 (1) 0010110001
12908	1	1101111100 (1) 1111111100
12907	1	1101111100 (1) 1001111100
12906	1	0101111100 (1) 0111111100
12905	1	0101111100 (1) 0001111100
12307	1	1111110001 (1) 1111110101
12306	1	1111110001 (1) 1111111001
12305	1	1111110001 (1) 1110110001
12304	1	1111110001 (1) 1101110001
12303	1	1111110001 (1) 1011110001
12279	1	0111110001 (1) 0111110101
12278	1	0111110001 (1) 0111111001
12277	1	0111110001 (1) 0110110001
12276	1	0111110001 (1) 0101110001
12275	1	0111110001 (1) 0011110001
11501	1	0010101001 (1) 0010101101
11500	1	0010101001 (1) 0010100001
11499	1	0010101001 (1) 0010111001
11498	1	0010101001 (1) 0010001001
11478	1	1010101001 (1) 1010101101
11477	1	1010101001 (1) 1010100001
11476	1	1010101001 (1) 1010111001
11475	1	1010101001 (1) 1010001001
11474	1	1010101001 (1) 1110101001
11847	1	1001100110 (1) 1001100100
11846	1	1001100110 (1) 1001100010
11845	1	1001100110 (1) 1001110110
11844	1	1001100110 (1) 1011100110
11843	1	1001100110 (1) 1101100110
13350	1	1000010110 (1) 1000010010
13349	1	1000010110 (1) 1000000110
13348	1	1000010110 (1) 1000110110
13347	1	1000010110 (1) 1001010110
13346	1	1000010110 (1) 1010010110
13402	1	1011011010 (1) 1011011110
13401	1	1011011010 (1) 1011010010
13400	1	1011011010 (1) 1011001010
13399	1	1011011010 (1) 1010011010
13398	1	1011011010 (1) 1001011010
11842	1	0001100110 (1) 0001100100
11841	1	0001100110 (1) 0001100010
11840	1	0001100110 (1) 0001110110
11839	1	0001100110 (1) 0011100110
13373	1	0000010110 (1) 0000010010
13372	1	0000010110 (1) 0000000110
13371	1	0000010110 (1) 0000110110
13370	1	0000010110 (1) 0001010110
13369	1	0000010110 (1) 0010010110
13388	1	0011011010 (1) 0011011110
13387	1	0011011010 (1) 0011010010
13386	1	0011011010 (1) 0011001010
13385	1	0011011010 (1) 0010011010
13384	1	0011011010 (1) 0001011010
11408	1	1110101001 (1) 1110101101
11407	1	1110101001 (1) 1110100001
11406	1	1110101001 (1) 1110111001
11405	1	1110101001 (1) 1110001001
11404	1	1110101001 (1) 1100101001
11394	1	0110101001 (1) 0110101101
11393	1	0110101001 (1) 0110100001
11392	1	0110101001 (1) 0110111001
11391	1	0110101001 (1) 0110001001
11390	1	0110101001 (1) 0100101001
11389	1	0110101001 (1) 0010101001
12857	1	1011111100 (1) 1011011100
12856	1	1011111100 (1) 1010111100
11804	1	1101100110 (1) 1101100100
11803	1	1101100110 (1) 1101100010
11802	1	1101100110 (1) 1101110110
11801	1	1101100110 (1) 1111100110
13267	1	1100010110 (1) 1100010010
13266	1	1100010110 (1) 1100000110
13265	1	1100010110 (1) 1100110110
13264	1	1100010110 (1) 1101010110
13263	1	1100010110 (1) 1110010110
13262	1	1100010110 (1) 1000010110
12853	1	0011111100 (1) 0011011100
12852	1	0011111100 (1) 0010111100
13294	1	0100010110 (1) 0100010010
13293	1	0100010110 (1) 0100000110
13292	1	0100010110 (1) 0100110110
13291	1	0100010110 (1) 0101010110
13290	1	0100010110 (1) 0110010110
13289	1	0100010110 (1) 0000010110
11797	1	0101100110 (1) 0101100100
11796	1	0101100110 (1) 0101100010
11795	1	0101100110 (1) 0101110110
11794	1	0101100110 (1) 0111100110
11793	1	0101100110 (1) 0001100110
12849	1	1001000101 (1) 1001000111
12848	1	1001000101 (1) 1001100101
12847	1	1001000101 (1) 1011000101
12846	1	1001000101 (1) 1101000101
13326	1	0111011010 (1) 0111011110
13325	1	0111011010 (1) 0111010010
13324	1	0111011010 (1) 0111001010
13323	1	0111011010 (1) 0111111010
13322	1	0111011010 (1) 0110011010
13321	1	0111011010 (1) 0101011010
13320	1	0111011010 (1) 0011011010
13314	1	1111011010 (1) 1111011110
13313	1	1111011010 (1) 1111010010
13312	1	1111011010 (1) 1111001010
13311	1	1111011010 (1) 1111111010
13310	1	1111011010 (1) 1110011010
13309	1	1111011010 (1) 1101011010
13308	1	1111011010 (1) 1011011010
12860	1	0001000101 (1) 0001000111
12859	1	0001000101 (1) 0001100101
12858	1	0001000101 (1) 0011000101
12843	1	1111111100 (1) 1110111100
12842	1	1111111100 (1) 1011111100
12841	1	0111111100 (1) 0110111100
12840	1	0111111100 (1) 0011111100
12837	1	1101000101 (1) 1101000111
[truncated: 2,100 more rows]
