# Supplementary material
Source: publisher figshare collection journal article supplement (https://springernature.figshare.com/ndownloader/files/17562821)
Supplement: Supplementary file 1 [file 17562821 › CytoscapeSession-2018_09_25-21_15/tables/9166-STG%2C+Model+4/SHARED_ATTRS-org.cytoscape.model.CyNode-STG%2C+Model+4+root+shared++node.cytable]

CyCSV-Version	1
SUID	shared name
java.lang.Long	java.lang.String
STG, Model 4 root shared node
10215	0000000000
10214	0000000010
10213	0001000000
10212	1000000000
10211	1000000010
10210	1001000000
10209	1100000000
10208	1100000010
10207	1101000000
10206	0100000000
10205	0100000010
10204	0101000000
10203	1010000000
10202	1010000010
10201	1110000000
10200	0010000000
10199	0010000010
10198	1110000010
10197	0110000000
10196	0110000010
10195	0001000010
10194	1001000010
10193	1101000010
10192	1101100000
10191	0101000010
10190	0101100000
10189	1011000000
10188	1011000010
10187	1111000000
10186	0011000000
10185	0011000010
10184	1111000010
10183	1111100000
10182	0111000000
10181	0111000010
10180	0111100000
10179	1000100000
10178	1000110000
10177	1001100000
10176	1010100000
10175	1100100000
10174	0000100000
10173	0000110000
10172	0001100000
10171	0010100000
10170	1100110000
10169	0100100000
10168	0100110000
10167	1010110000
10166	1110100000
10165	0010110000
10164	1110110000
10163	0110100000
10162	0110110000
10161	1001110000
10160	1011100000
10159	1000010000
10158	1000010010
10157	1000011000
10156	1001010000
10155	0001110000
10154	0011100000
10153	0000010000
10152	0000010010
10151	0000011000
10150	0001010000
10149	1101110000
10148	1100010000
10147	1100010010
10146	1100011000
10145	1101010000
10144	0101110000
10143	0100010000
10142	0100010010
10141	0100011000
10140	0101010000
10139	1011110000
10138	1010010000
10137	1010010010
10136	1010011000
10135	0011110000
10134	0010010000
10133	0010010010
10132	0010011000
10131	1111110000
10130	1110010000
10129	1110010010
10128	1110011000
10127	0111110000
10126	0110010000
10125	0110010010
10124	0110011000
10123	1001010010
10122	1001011000
10121	0001010010
10120	0001011000
10119	1101010010
10118	1101011000
10117	0101010010
10116	0101011000
10115	1000001000
10114	1000001010
10113	1001001000
10112	1100001000
10111	0000001000
10110	0000001010
10109	0001001000
10108	1100001010
10107	1101001000
10106	0100001000
10105	0100001010
10104	0101001000
10103	1011010000
10102	1011010010
10101	1011011000
10100	0011010000
10099	0011010010
10098	0011011000
10097	0111010000
10096	0111010010
10095	0111011000
10094	1111010000
10093	1111010010
10092	1111011000
10091	1010001000
10090	1010001010
10089	1110001000
10088	0010001000
10087	0010001010
10086	1000111000
10085	1110001010
10084	0000111000
10083	0110001000
10082	0110001010
10081	1100111000
10080	0100111000
10079	1010111000
10078	1001001010
10077	0010111000
10076	0001001010
10075	1110111000
10074	1101001010
10073	1101101000
10072	0110111000
10071	0101001010
10070	0101101000
10069	1000000100
10068	1000000110
10067	1000100100
10066	1001000100
10065	1010000100
10064	1100000100
10063	1011001000
10062	1011001010
10061	1111001000
10060	0000000100
10059	0000000110
10058	0000100100
10057	0001000100
10056	0010000100
10055	0011001000
10054	0011001010
10053	1001111000
10052	1100000110
10051	1100100100
10050	1101000100
10049	1110000100
10048	1111001010
10047	1111101000
10046	0001111000
10045	0100000100
10044	0100000110
10043	0100100100
10042	0101000100
10041	0110000100
10040	0111001000
10039	0111001010
10038	0111101000
10037	1101111000
10036	0101111000
10035	0000101000
10034	0001101000
10033	0010101000
10032	1000101000
10031	1001101000
10030	1010101000
10029	1100101000
10028	1010000110
10027	1010100100
10026	0010000110
10025	0010100100
10024	0100101000
10023	1011111000
10022	1110000110
10021	1110100100
10020	0011111000
10019	0110000110
10018	0110100100
10017	1111111000
10016	0111111000
10015	1110101000
10014	0110101000
10013	1001000110
10012	1001100100
10011	1011000100
10010	0001000110
10009	0001100100
10008	0011000100
10007	1101000110
10006	1101100100
10005	1111000100
10004	0101000110
10003	0101100100
10002	0111000100
10001	1000011010
10000	1000011100
9999	0000011010
9998	0000011100
9997	0011101000
9996	1011101000
9995	1100011010
9994	1100011100
9993	1011000110
9992	1011100100
9991	0011000110
9990	0011100100
9989	0100011010
9988	0100011100
9987	1111000110
9986	1111100100
9985	0111000110
9984	0111100100
9983	1000110100
9982	1010011010
9981	1010011100
9980	0010011010
9979	0010011100
9978	0000110100
9977	1110011010
9976	1110011100
9975	1100110100
9974	0110011010
9973	0110011100
9972	0100110100
9971	1010110100
9970	0010110100
9969	1110110100
9968	1001011010
9967	1001011100
9966	0001011010
9965	0001011100
9964	0110110100
9963	1101011010
9962	1101011100
9961	0101011010
9960	0101011100
9959	1101100010
9958	1001110100
9957	1011011010
9956	1011011100
9955	0101100010
9954	0001110100
9953	0011011010
9952	0011011100
9951	0000010100
9950	0000010110
9949	0001010100
9948	0010010100
9947	1000010100
9946	1000010110
9945	1001010100
9944	1010010100
9943	1101110100
9942	0101110100
9941	0111011010
9940	0111011100
9939	1111011010
9938	1111011100
9937	0100010100
9936	0100010110
9935	0101010100
9934	0110010100
9933	1100010100
9932	1100010110
9931	1101010100
9930	1110010100
9929	1000111100
9928	0000111100
9927	1111100010
9926	1100111100
9925	1011110100
9924	0011110100
9923	0100111100
9922	0111100010
9921	0010010110
9920	1010010110
9919	1111110100
9918	0111110100
9917	0110010110
9916	1110010110
9915	1000100010
9914	1000110010
9913	1001100010
9912	1010100010
9911	1100100010
9910	0000100010
9909	0000110010
9908	0001100010
9907	0010100010
9906	1010111100
9905	1100110010
9904	0010111100
9903	0100100010
9902	0100110010
9901	0000000001
9900	0000000011
9899	0000000101
9898	0001000001
9897	1000000001
9896	1000000011
9895	1000000101
9894	1001000001
9893	1100000001
9892	1110111100
9891	0110111100
9890	1100000011
9889	1100000101
9888	1101000001
9887	0100000001
9886	0100000011
9885	0100000101
9884	0101000001
9883	0001010110
9882	0011010100
9881	1001010110
9880	1011010100
9879	1010110010
9878	1110100010
9877	0010110010
9876	0101010110
9875	0111010100
9874	1101010110
9873	1111010100
9872	1110110010
9871	1000001100
9870	1000001110
9869	1001001100
9868	1010001100
9867	1100001100
9866	0000001100
9865	0000001110
9864	0001001100
9863	0010001100
9862	0110100010
9861	0110110010
9860	1010000001
9859	1010000011
9858	1010000101
9857	1110000001
9856	0010000001
9855	0010000011
9854	0010000101
9853	1001111100
9852	1100001110
9851	1101001100
9850	1110001100
9849	0001111100
9848	0100001100
9847	0100001110
9846	0101001100
9845	0110001100
9844	1110000011
9843	1110000101
9842	0110000001
9841	0110000011
9840	0110000101
9839	1101111100
9838	0101111100
9837	0011010110
9836	1011010110
9835	0111010110
9834	1111010110
9833	1010001110
9832	1001110010
9831	1011100010
9830	0010001110
9829	0001110010
9828	0011100010
9827	1101110010
9826	0110001110
9825	0001000011
9824	0001000101
9823	1011111100
9822	1110001110
9821	0011111100
9820	1001000011
9819	1001000101
9818	0101110010
9817	1111111100
9816	0111111100
9815	1101000011
9814	1101000101
9813	1101100001
9812	0101000011
9811	0101000101
9810	0101100001
9809	1011110010
9808	0011110010
9807	1111110010
9806	1001001110
9805	1011001100
9804	0011000001
9803	0011000011
9802	0011000101
9801	0001001110
9800	0011001100
9799	0111110010
9798	1011000001
9797	1011000011
9796	1011000101
9795	1111000001
9794	1101001110
9793	1101101100
9792	1111001100
9791	0101001110
9790	0101101100
9789	0111001100
9788	1111000011
9787	1111000101
9786	1111100001
9785	0111000001
9784	0111000011
9783	0111000101
9782	0111100001
9781	0000100001
9780	0000100101
9779	0000110001
9778	0001100001
9777	0010100001
9776	1000100001
9775	1000100101
9774	1000110001
9773	1001100001
9772	1010100001
9771	1100100001
9770	1011001110
9769	0011001110
9768	1100100101
9767	1100110001
9766	0100100001
9765	0100100101
9764	0100110001
9763	1111001110
9762	1111101100
9761	0111001110
9760	0111101100
9759	0000101100
9758	0001101100
9757	0010101100
9756	1000101100
9755	1001101100
9754	1010101100
9753	1100101100
9752	0010100101
9751	0010110001
9750	1010100101
9749	1010110001
9748	1110100001
9747	1110101100
9746	0100101100
9745	0110101100
9744	1110100101
9743	1110110001
9742	0110100001
9741	0110100101
9740	0110110001
9739	1000010001
9738	1000010011
9737	1000010101
9736	1000011001
9735	1001010001
9734	0000010001
9733	0000010011
9732	0000010101
9731	0000011001
9730	0001010001
9729	0001100101
9728	0001110001
9727	0011100001
9726	1001100101
9725	1001110001
9724	1011100001
9723	1101100101
9722	1101110001
9721	1100010001
9720	1100010011
9719	1100010101
9718	1100011001
9717	1101010001
9716	0101100101
9715	0101110001
9714	0100010001
9713	0100010011
9712	0100010101
9711	0100011001
9710	0101010001
9709	0000011110
9708	1101101010
9707	1000011110
9706	1011101100
9705	0011100101
9704	0011110001
9703	0101101010
9702	0010010001
9701	0010010011
9700	0010010101
9699	0010011001
9698	1011100101
9697	1011110001
9696	1010010001
9695	1010010011
9694	1010010101
9693	1010011001
9692	0011101100
9691	1100011110
9690	0100011110
9689	1111100101
9688	1111110001
9687	1110010001
9686	1110010011
9685	1110010101
9684	1110011001
9683	0111100101
9682	0111110001
9681	0110010001
9680	0110010011
9679	0110010101
9678	0110011001
9677	1000100110
9676	0000100110
9675	1010011110
9674	1100100110
9673	1111101010
9672	0010011110
9671	0111101010
9670	0100100110
9669	1110011110
9668	0110011110
9667	1001010011
9666	1001010101
9665	1001011001
9664	0001010011
9663	0001010101
9662	0001011001
9661	0000101010
9660	0000111010
9659	0001101010
9658	0010101010
9657	1000101010
9656	1000111010
9655	1001101010
9654	1010101010
9653	1100101010
9652	1101010011
9651	1101010101
9650	1101011001
9649	0101010011
9648	0101010101
9647	0101011001
9646	1010100110
9645	1100111010
9644	0010100110
9643	0100101010
9642	0100111010
9641	1000001001
9640	1000001011
9639	1000001101
9638	1001001001
9637	1100001001
9636	0000001001
9635	0000001011
9634	0000001101
9633	0001001001
9632	1110100110
9631	0110100110
9630	1100001011
9629	1100001101
9628	1101001001
9627	0100001001
9626	0100001011
9625	0100001101
9624	0101001001
9623	1001011110
9622	0001011110
9621	1011010001
9620	1011010011
9619	1011010101
9618	1011011001
9617	0011010001
9616	0011010011
9615	0011010101
9614	0011011001
9613	1101011110
9612	0010111010
9611	0101011110
9610	1010111010
9609	1110101010
9608	0111010001
9607	0111010011
9606	0111010101
9605	0111011001
9604	1111010001
9603	1111010011
9602	1111010101
9601	1111011001
9600	1110111010
9599	0110101010
9598	0110111010
9597	1010001001
9596	1010001011
9595	1010001101
9594	1110001001
9593	0010001001
9592	0010001011
9591	0010001101
9590	1001100110
9589	0001100110
9588	1110001011
9587	1110001101
9586	1000110101
9585	1000111001
9584	0110001001
9583	0110001011
9582	0110001101
9581	0000110101
9580	0000111001
9579	1011011110
9578	1101100110
9577	0011011110
9576	0101100110
9575	1100110101
9574	1100111001
9573	0100110101
9572	0100111001
9571	1111011110
9570	0111011110
9569	0001111010
9568	0011101010
9567	1001111010
9566	1011101010
9565	1101111010
9564	0010110101
9563	0010111001
9562	1001001011
9561	1001001101
9560	1011100110
9559	0001001011
9558	0001001101
9557	1010110101
9556	1010111001
9555	0011100110
9554	0101111010
9553	1111100110
9552	0111100110
9551	1101001011
9550	1101001101
9549	1101101001
9548	1110110101
9547	1110111001
9546	0101001011
9545	0101001101
9544	0101101001
9543	0110110101
9542	0110111001
9541	1000110110
9540	0000110110
9539	0011111010
9538	1011111010
9537	1100110110
9536	1111111010
9535	1000000111
9534	0011001001
9533	0011001011
9532	0011001101
9531	0100110110
9530	0000000111
9529	1011001001
9528	1011001011
9527	1011001101
9526	1111001001
9525	0111111010
9524	1100000111
9523	1001110101
9522	1001111001
9521	1111001011
9520	1111001101
9519	1111101001
9518	0100000111
9517	0001110101
9516	0001111001
9515	0111001001
9514	0111001011
9513	0111001101
9512	0111101001
9511	1101110101
9510	1101111001
9509	0101110101
9508	0101111001
9507	1010110110
9506	0010110110
9505	0000101001
9504	0000101101
9503	0001101001
9502	0010101001
9501	1000101001
9500	1000101101
9499	1001101001
9498	1010101001
9497	1100101001
9496	1110110110
9495	0110110110
9494	0010000111
9493	1010000111
9492	1100101101
9491	0100101001
9490	0100101101
9489	1110000111
9488	1011110101
9487	1011111001
9486	0110000111
9485	0011110101
9484	0011111001
9483	1111110101
9482	1111111001
9481	0111110101
9480	0111111001
9479	0010101101
9478	1010101101
9477	1110101001
9476	1001110110
9475	0001110110
9474	1110101101
9473	0110101001
9472	0110101101
9471	1101110110
9470	0101110110
9469	1001000111
9468	0001000111
9467	1101000111
9466	0101000111
9465	1000111110
9464	0000111110
9463	1011110110
9462	1100111110
9461	0011110110
9460	0100111110
9459	1000011011
9458	1000011101
9457	0000011011
9456	0000011101
9455	0001101101
9454	0011101001
9453	1001101101
9452	1011101001
9451	1111110110
9450	0111110110
9449	0100011011
9448	0100011101
9447	0011000111
9446	1011000111
9445	1101101101
9444	1100011011
9443	1100011101
9442	0101101101
9441	1111000111
9440	0111000111
9439	1010111110
9438	0010111110
9437	1110111110
9436	0110111110
9435	1010011011
9434	1010011101
9433	1011101101
9432	0011101101
9431	0010011011
9430	0010011101
9429	1110011011
9428	1110011101
9427	1111101101
9426	0110011011
9425	0110011101
9424	0111101101
9423	1001111110
9422	0001111110
9421	1101111110
9420	0101111110
9419	1001011011
9418	1001011101
9417	0001011011
9416	0001011101
9415	1101011011
9414	1101011101
9413	0101011011
9412	0101011101
9411	1011111110
9410	0011111110
9409	1011011011
9408	1011011101
9407	1111111110
9406	1000010111
9405	0011011011
9404	0011011101
9403	0111111110
9402	1101100011
9401	0000010111
9400	0101100011
9399	1100010111
9398	0100010111
9397	0111011011
9396	0111011101
9395	1111011011
9394	1111011101
9393	1000111101
9392	0000111101
9391	0010010111
9390	1101101110
9389	1100111101
9388	0111100011
9387	0101101110
9386	1111100011
9385	1010010111
9384	0100111101
9383	1110010111
9382	0110010111
9381	0000100011
9380	0000100111
9379	0000110011
9378	0001100011
9377	0010100011
9376	1000100011
9375	1000100111
9374	1000110011
9373	1001100011
9372	1010100011
9371	1100100011
9370	1010111101
9369	1100100111
9368	1100110011
9367	0010111101
9366	0100100011
9365	0100100111
9364	0100110011
9363	1111101110
9362	0111101110
9361	1110111101
9360	0110111101
9359	1001010111
9358	0001010111
9357	0000101110
9356	0001101110
9355	0010101110
9354	1000101110
9353	1001101110
9352	1010101110
9351	1100101110
9350	1101010111
9349	0010100111
9348	0010110011
9347	0101010111
9346	1010100111
9345	1010110011
9344	1110100011
9343	1110101110
9342	0100101110
9341	0110101110
9340	0000001111
9339	1000001111
9338	1110100111
9337	1110110011
9336	0110100011
9335	0110100111
9334	0110110011
9333	1100001111
9332	1001111101
9331	0100001111
9330	0001111101
9329	1101111101
9328	1011010111
9327	0101111101
9326	0011010111
9325	1111010111
9324	0111010111
9323	0010001111
9322	1010001111
9321	0001100111
9320	0001110011
9319	0011100011
9318	1001100111
9317	1001110011
9316	1011100011
9315	1101100111
9314	1101110011
9313	1110001111
9312	0011111101
9311	1011111101
9310	0110001111
9309	0101100111
9308	0101110011
9307	1111111101
9306	0111111101
9305	0011101110
9304	1011101110
9303	0011100111
9302	0011110011
9301	1011100111
9300	1011110011
9299	0111100111
9298	0111110011
9297	0001001111
9296	1001001111
9295	1111100111
9294	1111110011
9293	1101001111
9292	0101001111
9291	0011001111
9290	1011001111
9289	1111001111
9288	0111001111
9287	1000110111
9286	0000110111
9285	1100110111
9284	0100110111
9283	1010110111
9282	0010110111
9281	0000011111
9280	1000011111
9279	1101101011
9278	0110110111
9277	1110110111
9276	0101101011
9275	1100011111
9274	0100011111
9273	0010011111
9272	0111101011
9271	1010011111
9270	1001110111
9269	1111101011
9268	0001110111
9267	1110011111
9266	1101110111
9265	0110011111
9264	0101110111
9263	0000101011
9262	0000101111
9261	0000111011
9260	0001101011
9259	0010101011
9258	1000101011
9257	1000101111
9256	1000111011
9255	1001101011
9254	1010101011
9253	1100101011
9252	1100101111
9251	1100111011
9250	0100101011
9249	0100101111
9248	0100111011
9247	1011110111
9246	0011110111
9245	0001011111
9244	1001011111
9243	1111110111
9242	0111110111
9241	1101011111
9240	0101011111
9239	0010101111
9238	0010111011
9237	1010101111
9236	1010111011
9235	1110101011
9234	1110101111
9233	1110111011
9232	0110101011
9231	0110101111
9230	0110111011
9229	0011011111
9228	1011011111
9227	1111011111
9226	0111011111
9225	0001101111
9224	0001111011
9223	0011101011
9222	1001101111
9221	1001111011
9220	1011101011
9219	1101101111
9218	1101111011
9217	0101101111
9216	0101111011
9215	0011101111
9214	0011111011
9213	1011101111
9212	1011111011
9211	1111101111
9210	1111111011
9209	0111101111
9208	0111111011
9207	1000111111
9206	0000111111
9205	1100111111
9204	0100111111
9203	1010111111
9202	0010111111
9201	1110111111
9200	0110111111
9199	1001111111
9198	0001111111
9197	1101111111
9196	0101111111
9195	1011111111
9194	0011111111
9193	1111111111
9192	0111111111
