# Supplementary material
Source: publisher figshare collection journal article supplement (https://springernature.figshare.com/ndownloader/files/17562821)
Supplement: Supplementary file 1 [file 17562821 › CytoscapeSession-2018_09_25-21_15/tables/9182-STG%2C+Model+4/LOCAL_ATTRS-org.cytoscape.model.CyEdge-STG%2C+Model+4+default++edge.cytable]

CyCSV-Version	1
SUID	interaction	name	selected
java.lang.Long	java.lang.String	java.lang.String	java.lang.Boolean
STG, Model 4 default edge
10216	1	0111111111 (1) 0011111111	false
10217	1	0111111111 (1) 0110111111	false
10218	1	0111111111 (1) 0111110111	false
10219	1	0111111111 (1) 0111111101	false
10220	1	1111111111 (1) 1011111111	false
10221	1	1111111111 (1) 1110111111	false
10222	1	1111111111 (1) 1111110111	false
10223	1	1111111111 (1) 1111111101	false
10224	1	0011111111 (1) 0010111111	false
10225	1	0011111111 (1) 0011011111	false
10226	1	0011111111 (1) 0011110111	false
10227	1	0011111111 (1) 0011111101	false
10228	1	1011111111 (1) 1010111111	false
10229	1	1011111111 (1) 1011011111	false
10230	1	1011111111 (1) 1011110111	false
10231	1	1011111111 (1) 1011111101	false
10232	1	0101111111 (1) 0001111111	false
10233	1	0101111111 (1) 0111111111	false
10234	1	0101111111 (1) 0101110111	false
10235	1	0101111111 (1) 0101111101	false
10236	1	1101111111 (1) 1001111111	false
10237	1	1101111111 (1) 1111111111	false
10238	1	1101111111 (1) 1101110111	false
10239	1	1101111111 (1) 1101111101	false
10240	1	0001111111 (1) 0011111111	false
10241	1	0001111111 (1) 0001011111	false
10242	1	0001111111 (1) 0001110111	false
10243	1	0001111111 (1) 0001111101	false
10244	1	1001111111 (1) 1011111111	false
10245	1	1001111111 (1) 1001011111	false
10246	1	1001111111 (1) 1001110111	false
10247	1	1001111111 (1) 1001111101	false
10248	1	0110111111 (1) 0010111111	false
10249	1	0110111111 (1) 0110011111	false
10250	1	0110111111 (1) 0110110111	false
10251	1	0110111111 (1) 0110111101	false
10252	1	1110111111 (1) 1010111111	false
10253	1	1110111111 (1) 1110011111	false
10254	1	1110111111 (1) 1110110111	false
10255	1	1110111111 (1) 1110111101	false
10256	1	0010111111 (1) 0010011111	false
10257	1	0010111111 (1) 0010110111	false
10258	1	0010111111 (1) 0010111101	false
10259	1	1010111111 (1) 1010011111	false
10260	1	1010111111 (1) 1010110111	false
10261	1	1010111111 (1) 1010111101	false
10262	1	0100111111 (1) 0000111111	false
10263	1	0100111111 (1) 0110111111	false
10264	1	0100111111 (1) 0101111111	false
10265	1	0100111111 (1) 0100011111	false
10266	1	0100111111 (1) 0100110111	false
10267	1	0100111111 (1) 0100111101	false
10268	1	1100111111 (1) 1000111111	false
10269	1	1100111111 (1) 1110111111	false
10270	1	1100111111 (1) 1101111111	false
10271	1	1100111111 (1) 1100011111	false
10272	1	1100111111 (1) 1100110111	false
10273	1	1100111111 (1) 1100111101	false
10274	1	0000111111 (1) 0010111111	false
10275	1	0000111111 (1) 0001111111	false
10276	1	0000111111 (1) 0000011111	false
10277	1	0000111111 (1) 0000110111	false
10278	1	0000111111 (1) 0000111101	false
10279	1	1000111111 (1) 1010111111	false
10280	1	1000111111 (1) 1001111111	false
10281	1	1000111111 (1) 1000011111	false
10282	1	1000111111 (1) 1000110111	false
10283	1	1000111111 (1) 1000111101	false
10284	1	0111111011 (1) 0011111011	false
10285	1	0111111011 (1) 0101111011	false
10286	1	0111111011 (1) 0110111011	false
10287	1	0111111011 (1) 0111110011	false
10288	1	0111111011 (1) 0111111111	false
10289	1	0111111011 (1) 0111111001	false
10290	1	0111101111 (1) 0011101111	false
10291	1	0111101111 (1) 0110101111	false
10292	1	0111101111 (1) 0111111111	false
10293	1	0111101111 (1) 0111100111	false
10294	1	0111101111 (1) 0111101101	false
10295	1	1111111011 (1) 1011111011	false
10296	1	1111111011 (1) 1101111011	false
10297	1	1111111011 (1) 1110111011	false
10298	1	1111111011 (1) 1111110011	false
10299	1	1111111011 (1) 1111111111	false
10300	1	1111111011 (1) 1111111001	false
10301	1	1111101111 (1) 1110101111	false
10302	1	1111101111 (1) 1111111111	false
10303	1	1111101111 (1) 1111100111	false
10304	1	1111101111 (1) 1111101101	false
10305	1	1011111011 (1) 1010111011	false
10306	1	1011111011 (1) 1011011011	false
10307	1	1011111011 (1) 1011110011	false
10308	1	1011111011 (1) 1011111111	false
10309	1	1011111011 (1) 1011111001	false
10310	1	1011101111 (1) 1111101111	false
10311	1	1011101111 (1) 1010101111	false
10312	1	1011101111 (1) 1011001111	false
10313	1	1011101111 (1) 1011111111	false
10314	1	1011101111 (1) 1011100111	false
10315	1	1011101111 (1) 1011101101	false
10316	1	0011111011 (1) 0010111011	false
10317	1	0011111011 (1) 0011011011	false
10318	1	0011111011 (1) 0011110011	false
10319	1	0011111011 (1) 0011111111	false
10320	1	0011111011 (1) 0011111001	false
10321	1	0011101111 (1) 0010101111	false
10322	1	0011101111 (1) 0011001111	false
10323	1	0011101111 (1) 0011111111	false
10324	1	0011101111 (1) 0011100111	false
10325	1	0011101111 (1) 0011101101	false
10326	1	0101111011 (1) 0001111011	false
10327	1	0101111011 (1) 0101110011	false
10328	1	0101111011 (1) 0101111111	false
10329	1	0101111011 (1) 0101111001	false
10330	1	0101101111 (1) 0001101111	false
10331	1	0101101111 (1) 0111101111	false
10332	1	0101101111 (1) 0101111111	false
10333	1	0101101111 (1) 0101100111	false
10334	1	0101101111 (1) 0101101101	false
10335	1	1101111011 (1) 1001111011	false
10336	1	1101111011 (1) 1101110011	false
10337	1	1101111011 (1) 1101111111	false
10338	1	1101111011 (1) 1101111001	false
10339	1	1101101111 (1) 1111101111	false
10340	1	1101101111 (1) 1101111111	false
10341	1	1101101111 (1) 1101100111	false
10342	1	1101101111 (1) 1101101101	false
10343	1	1011101011 (1) 1111101011	false
10344	1	1011101011 (1) 1010101011	false
10345	1	1011101011 (1) 1011001011	false
10346	1	1011101011 (1) 1011111011	false
10347	1	1011101011 (1) 1011100011	false
10348	1	1011101011 (1) 1011101111	false
10349	1	1011101011 (1) 1011101001	false
10350	1	1001111011 (1) 1011111011	false
10351	1	1001111011 (1) 1001011011	false
10352	1	1001111011 (1) 1001110011	false
10353	1	1001111011 (1) 1001111111	false
10354	1	1001111011 (1) 1001111001	false
10355	1	1001101111 (1) 1101101111	false
10356	1	1001101111 (1) 1011101111	false
10357	1	1001101111 (1) 1001001111	false
10358	1	1001101111 (1) 1001111111	false
10359	1	1001101111 (1) 1001100111	false
10360	1	1001101111 (1) 1001101101	false
10361	1	0011101011 (1) 0010101011	false
10362	1	0011101011 (1) 0011001011	false
10363	1	0011101011 (1) 0011111011	false
10364	1	0011101011 (1) 0011100011	false
10365	1	0011101011 (1) 0011101111	false
10366	1	0011101011 (1) 0011101001	false
10367	1	0001111011 (1) 0011111011	false
10368	1	0001111011 (1) 0001011011	false
10369	1	0001111011 (1) 0001110011	false
10370	1	0001111011 (1) 0001111111	false
10371	1	0001111011 (1) 0001111001	false
10372	1	0001101111 (1) 0011101111	false
10373	1	0001101111 (1) 0001001111	false
10374	1	0001101111 (1) 0001111111	false
10375	1	0001101111 (1) 0001100111	false
10376	1	0001101111 (1) 0001101101	false
10377	1	0111011111 (1) 0011011111	false
10378	1	0111011111 (1) 0110011111	false
10379	1	0111011111 (1) 0111111111	false
10380	1	0111011111 (1) 0111001111	false
10381	1	0111011111 (1) 0111010111	false
10382	1	1111011111 (1) 1011011111	false
10383	1	1111011111 (1) 1110011111	false
10384	1	1111011111 (1) 1111111111	false
10385	1	1111011111 (1) 1111001111	false
10386	1	1111011111 (1) 1111010111	false
10387	1	1011011111 (1) 1010011111	false
10388	1	1011011111 (1) 1011001111	false
10389	1	1011011111 (1) 1011010111	false
10390	1	0011011111 (1) 0010011111	false
10391	1	0011011111 (1) 0011001111	false
10392	1	0011011111 (1) 0011010111	false
10393	1	0110111011 (1) 0010111011	false
10394	1	0110111011 (1) 0100111011	false
10395	1	0110111011 (1) 0110011011	false
10396	1	0110111011 (1) 0110110011	false
10397	1	0110111011 (1) 0110111111	false
10398	1	0110111011 (1) 0110111001	false
10399	1	0110101111 (1) 0010101111	false
10400	1	0110101111 (1) 0110001111	false
10401	1	0110101111 (1) 0110111111	false
10402	1	0110101111 (1) 0110100111	false
10403	1	0110101111 (1) 0110101101	false
10404	1	0110101011 (1) 0010101011	false
10405	1	0110101011 (1) 0100101011	false
10406	1	0110101011 (1) 0110001011	false
10407	1	0110101011 (1) 0110111011	false
10408	1	0110101011 (1) 0110100011	false
10409	1	0110101011 (1) 0110101111	false
10410	1	0110101011 (1) 0110101001	false
10411	1	1110111011 (1) 1010111011	false
10412	1	1110111011 (1) 1100111011	false
10413	1	1110111011 (1) 1110011011	false
10414	1	1110111011 (1) 1110110011	false
10415	1	1110111011 (1) 1110111111	false
10416	1	1110111011 (1) 1110111001	false
10417	1	1110101111 (1) 1110001111	false
10418	1	1110101111 (1) 1110111111	false
10419	1	1110101111 (1) 1110100111	false
10420	1	1110101111 (1) 1110101101	false
10421	1	1110101011 (1) 1100101011	false
10422	1	1110101011 (1) 1110001011	false
10423	1	1110101011 (1) 1110111011	false
10424	1	1110101011 (1) 1110100011	false
10425	1	1110101011 (1) 1110101111	false
10426	1	1110101011 (1) 1110101001	false
10427	1	1010111011 (1) 1010011011	false
10428	1	1010111011 (1) 1010110011	false
10429	1	1010111011 (1) 1010111111	false
10430	1	1010111011 (1) 1010111001	false
10431	1	1010101111 (1) 1110101111	false
10432	1	1010101111 (1) 1010001111	false
10433	1	1010101111 (1) 1010111111	false
10434	1	1010101111 (1) 1010100111	false
10435	1	1010101111 (1) 1010101101	false
10436	1	0010111011 (1) 0010011011	false
10437	1	0010111011 (1) 0010110011	false
10438	1	0010111011 (1) 0010111111	false
10439	1	0010111011 (1) 0010111001	false
10440	1	0010101111 (1) 0010001111	false
10441	1	0010101111 (1) 0010111111	false
10442	1	0010101111 (1) 0010100111	false
10443	1	0010101111 (1) 0010101101	false
10444	1	0101011111 (1) 0001011111	false
10445	1	0101011111 (1) 0111011111	false
10446	1	0101011111 (1) 0101111111	false
10447	1	0101011111 (1) 0101001111	false
10448	1	0101011111 (1) 0101010111	false
10449	1	1101011111 (1) 1001011111	false
10450	1	1101011111 (1) 1111011111	false
10451	1	1101011111 (1) 1101111111	false
10452	1	1101011111 (1) 1101001111	false
10453	1	1101011111 (1) 1101010111	false
10454	1	0111110111 (1) 0011110111	false
10455	1	0111110111 (1) 0110110111	false
10456	1	0111110111 (1) 0111110101	false
10457	1	1111110111 (1) 1011110111	false
10458	1	1111110111 (1) 1110110111	false
10459	1	1111110111 (1) 1111110101	false
10460	1	1001011111 (1) 1011011111	false
10461	1	1001011111 (1) 1001001111	false
10462	1	1001011111 (1) 1001010111	false
10463	1	0001011111 (1) 0011011111	false
10464	1	0001011111 (1) 0001001111	false
10465	1	0001011111 (1) 0001010111	false
10466	1	0011110111 (1) 0010110111	false
10467	1	0011110111 (1) 0011110101	false
10468	1	1011110111 (1) 1010110111	false
10469	1	1011110111 (1) 1011110101	false
10470	1	0100111011 (1) 0000111011	false
10471	1	0100111011 (1) 0101111011	false
10472	1	0100111011 (1) 0100011011	false
10473	1	0100111011 (1) 0100110011	false
10474	1	0100111011 (1) 0100111111	false
10475	1	0100111011 (1) 0100111001	false
10476	1	0100101111 (1) 0000101111	false
10477	1	0100101111 (1) 0110101111	false
10478	1	0100101111 (1) 0101101111	false
10479	1	0100101111 (1) 0100001111	false
10480	1	0100101111 (1) 0100111111	false
10481	1	0100101111 (1) 0100100111	false
10482	1	0100101111 (1) 0100101101	false
10483	1	0100101011 (1) 0000101011	false
10484	1	0100101011 (1) 0101101011	false
10485	1	0100101011 (1) 0100001011	false
10486	1	0100101011 (1) 0100111011	false
10487	1	0100101011 (1) 0100100011	false
10488	1	0100101011 (1) 0100101111	false
10489	1	0100101011 (1) 0100101001	false
10490	1	1100111011 (1) 1000111011	false
10491	1	1100111011 (1) 1101111011	false
10492	1	1100111011 (1) 1100011011	false
10493	1	1100111011 (1) 1100110011	false
10494	1	1100111011 (1) 1100111111	false
10495	1	1100111011 (1) 1100111001	false
10496	1	1100101111 (1) 1110101111	false
10497	1	1100101111 (1) 1101101111	false
10498	1	1100101111 (1) 1100001111	false
10499	1	1100101111 (1) 1100111111	false
10500	1	1100101111 (1) 1100100111	false
10501	1	1100101111 (1) 1100101101	false
10502	1	1100101011 (1) 1101101011	false
10503	1	1100101011 (1) 1100001011	false
10504	1	1100101011 (1) 1100111011	false
10505	1	1100101011 (1) 1100100011	false
10506	1	1100101011 (1) 1100101111	false
10507	1	1100101011 (1) 1100101001	false
10508	1	1010101011 (1) 1110101011	false
10509	1	1010101011 (1) 1010001011	false
10510	1	1010101011 (1) 1010111011	false
10511	1	1010101011 (1) 1010100011	false
10512	1	1010101011 (1) 1010101111	false
10513	1	1010101011 (1) 1010101001	false
10514	1	1001101011 (1) 1101101011	false
10515	1	1001101011 (1) 1011101011	false
10516	1	1001101011 (1) 1001001011	false
10517	1	1001101011 (1) 1001111011	false
10518	1	1001101011 (1) 1001100011	false
10519	1	1001101011 (1) 1001101111	false
10520	1	1001101011 (1) 1001101001	false
10521	1	1000111011 (1) 1010111011	false
10522	1	1000111011 (1) 1001111011	false
10523	1	1000111011 (1) 1000011011	false
10524	1	1000111011 (1) 1000110011	false
10525	1	1000111011 (1) 1000111111	false
10526	1	1000111011 (1) 1000111001	false
10527	1	1000101111 (1) 1100101111	false
10528	1	1000101111 (1) 1010101111	false
10529	1	1000101111 (1) 1001101111	false
10530	1	1000101111 (1) 1000001111	false
10531	1	1000101111 (1) 1000111111	false
10532	1	1000101111 (1) 1000100111	false
10533	1	1000101111 (1) 1000101101	false
10534	1	1000101011 (1) 1100101011	false
10535	1	1000101011 (1) 1010101011	false
10536	1	1000101011 (1) 1001101011	false
10537	1	1000101011 (1) 1000001011	false
10538	1	1000101011 (1) 1000111011	false
10539	1	1000101011 (1) 1000100011	false
10540	1	1000101011 (1) 1000101111	false
10541	1	1000101011 (1) 1000101001	false
10542	1	0010101011 (1) 0010001011	false
10543	1	0010101011 (1) 0010111011	false
10544	1	0010101011 (1) 0010100011	false
10545	1	0010101011 (1) 0010101111	false
10546	1	0010101011 (1) 0010101001	false
10547	1	0001101011 (1) 0011101011	false
10548	1	0001101011 (1) 0001001011	false
10549	1	0001101011 (1) 0001111011	false
10550	1	0001101011 (1) 0001100011	false
10551	1	0001101011 (1) 0001101111	false
10552	1	0001101011 (1) 0001101001	false
10553	1	0000111011 (1) 0010111011	false
10554	1	0000111011 (1) 0001111011	false
10555	1	0000111011 (1) 0000011011	false
10556	1	0000111011 (1) 0000110011	false
10557	1	0000111011 (1) 0000111111	false
10558	1	0000111011 (1) 0000111001	false
10559	1	0000101111 (1) 0010101111	false
10560	1	0000101111 (1) 0001101111	false
10561	1	0000101111 (1) 0000001111	false
10562	1	0000101111 (1) 0000111111	false
10563	1	0000101111 (1) 0000100111	false
10564	1	0000101111 (1) 0000101101	false
10565	1	0000101011 (1) 0010101011	false
10566	1	0000101011 (1) 0001101011	false
10567	1	0000101011 (1) 0000001011	false
10568	1	0000101011 (1) 0000111011	false
10569	1	0000101011 (1) 0000100011	false
10570	1	0000101011 (1) 0000101111	false
10571	1	0000101011 (1) 0000101001	false
10572	1	0101110111 (1) 0001110111	false
10573	1	0101110111 (1) 0111110111	false
10574	1	0101110111 (1) 0101110101	false
10575	1	0110011111 (1) 0010011111	false
10576	1	0110011111 (1) 0110001111	false
10577	1	0110011111 (1) 0110010111	false
10578	1	1101110111 (1) 1001110111	false
10579	1	1101110111 (1) 1111110111	false
10580	1	1101110111 (1) 1101110101	false
10581	1	1110011111 (1) 1010011111	false
10582	1	1110011111 (1) 1110001111	false
10583	1	1110011111 (1) 1110010111	false
10584	1	0001110111 (1) 0011110111	false
10585	1	0001110111 (1) 0001110101	false
10586	1	1111101011 (1) 1101101011	false
10587	1	1111101011 (1) 1110101011	false
10588	1	1111101011 (1) 1111111011	false
10589	1	1111101011 (1) 1111100011	false
10590	1	1111101011 (1) 1111101111	false
10591	1	1111101011 (1) 1111101001	false
10592	1	1001110111 (1) 1011110111	false
10593	1	1001110111 (1) 1001110101	false
10594	1	1010011111 (1) 1010001111	false
10595	1	1010011111 (1) 1010010111	false
10596	1	0111101011 (1) 0011101011	false
10597	1	0111101011 (1) 0101101011	false
10598	1	0111101011 (1) 0110101011	false
10599	1	0111101011 (1) 0111111011	false
10600	1	0111101011 (1) 0111100011	false
10601	1	0111101011 (1) 0111101111	false
10602	1	0111101011 (1) 0111101001	false
10603	1	0010011111 (1) 0010001111	false
10604	1	0010011111 (1) 0010010111	false
10605	1	0100011111 (1) 0000011111	false
10606	1	0100011111 (1) 0110011111	false
10607	1	0100011111 (1) 0101011111	false
10608	1	0100011111 (1) 0100001111	false
10609	1	0100011111 (1) 0100010111	false
10610	1	1100011111 (1) 1000011111	false
10611	1	1100011111 (1) 1110011111	false
10612	1	1100011111 (1) 1101011111	false
10613	1	1100011111 (1) 1100001111	false
10614	1	1100011111 (1) 1100010111	false
10615	1	0101101011 (1) 0001101011	false
10616	1	0101101011 (1) 0101111011	false
10617	1	0101101011 (1) 0101100011	false
10618	1	0101101011 (1) 0101101111	false
10619	1	0101101011 (1) 0101101001	false
10620	1	1110110111 (1) 1010110111	false
10621	1	1110110111 (1) 1110110101	false
10622	1	0110110111 (1) 0010110111	false
10623	1	0110110111 (1) 0110110101	false
10624	1	1101101011 (1) 1101111011	false
10625	1	1101101011 (1) 1101100011	false
10626	1	1101101011 (1) 1101101111	false
10627	1	1101101011 (1) 1101101001	false
10628	1	1000011111 (1) 1010011111	false
10629	1	1000011111 (1) 1001011111	false
10630	1	1000011111 (1) 1000001111	false
10631	1	1000011111 (1) 1000010111	false
10632	1	0000011111 (1) 0010011111	false
10633	1	0000011111 (1) 0001011111	false
10634	1	0000011111 (1) 0000001111	false
10635	1	0000011111 (1) 0000010111	false
10636	1	0010110111 (1) 0010110101	false
10637	1	1010110111 (1) 1010110101	false
10638	1	0100110111 (1) 0000110111	false
10639	1	0100110111 (1) 0110110111	false
10640	1	0100110111 (1) 0101110111	false
10641	1	0100110111 (1) 0100110101	false
10642	1	1100110111 (1) 1000110111	false
10643	1	1100110111 (1) 1110110111	false
10644	1	1100110111 (1) 1101110111	false
10645	1	1100110111 (1) 1100110101	false
10646	1	0000110111 (1) 0010110111	false
10647	1	0000110111 (1) 0001110111	false
10648	1	0000110111 (1) 0000110101	false
10649	1	1000110111 (1) 1010110111	false
10650	1	1000110111 (1) 1001110111	false
10651	1	1000110111 (1) 1000110101	false
10652	1	0111001111 (1) 0011001111	false
10653	1	0111001111 (1) 0110001111	false
10654	1	0111001111 (1) 0111101111	false
10655	1	0111001111 (1) 0111000111	false
10656	1	1111001111 (1) 1110001111	false
10657	1	1111001111 (1) 1111101111	false
10658	1	1111001111 (1) 1111000111	false
10659	1	1011001111 (1) 1111001111	false
10660	1	1011001111 (1) 1010001111	false
10661	1	1011001111 (1) 1011000111	false
10662	1	0011001111 (1) 0010001111	false
10663	1	0011001111 (1) 0011000111	false
10664	1	0101001111 (1) 0001001111	false
10665	1	0101001111 (1) 0111001111	false
10666	1	0101001111 (1) 0101101111	false
10667	1	0101001111 (1) 0101000111	false
10668	1	1101001111 (1) 1111001111	false
10669	1	1101001111 (1) 1101101111	false
10670	1	1101001111 (1) 1101000111	false
10671	1	1111110011 (1) 1011110011	false
10672	1	1111110011 (1) 1101110011	false
10673	1	1111110011 (1) 1110110011	false
10674	1	1111110011 (1) 1111110111	false
10675	1	1111110011 (1) 1111110001	false
10676	1	1111100111 (1) 1110100111	false
10677	1	1111100111 (1) 1111110111	false
10678	1	1111100111 (1) 1111100101	false
10679	1	1001001111 (1) 1101001111	false
10680	1	1001001111 (1) 1011001111	false
10681	1	1001001111 (1) 1001000111	false
10682	1	0001001111 (1) 0011001111	false
10683	1	0001001111 (1) 0001000111	false
10684	1	0111110011 (1) 0011110011	false
10685	1	0111110011 (1) 0101110011	false
10686	1	0111110011 (1) 0110110011	false
10687	1	0111110011 (1) 0111110111	false
10688	1	0111110011 (1) 0111110001	false
10689	1	0111100111 (1) 0011100111	false
10690	1	0111100111 (1) 0110100111	false
10691	1	0111100111 (1) 0111110111	false
10692	1	0111100111 (1) 0111100101	false
10693	1	1011110011 (1) 1010110011	false
10694	1	1011110011 (1) 1011010011	false
10695	1	1011110011 (1) 1011110111	false
10696	1	1011110011 (1) 1011110001	false
10697	1	1011100111 (1) 1111100111	false
10698	1	1011100111 (1) 1010100111	false
10699	1	1011100111 (1) 1011110111	false
10700	1	1011100111 (1) 1011100101	false
10701	1	0011110011 (1) 0010110011	false
10702	1	0011110011 (1) 0011010011	false
10703	1	0011110011 (1) 0011110111	false
10704	1	0011110011 (1) 0011110001	false
10705	1	0011100111 (1) 0010100111	false
10706	1	0011100111 (1) 0011110111	false
10707	1	0011100111 (1) 0011100101	false
10708	1	1011101110 (1) 1111101110	false
10709	1	1011101110 (1) 1010101110	false
10710	1	1011101110 (1) 1011001110	false
10711	1	1011101110 (1) 1011111110	false
10712	1	1011101110 (1) 1011100110	false
10713	1	1011101110 (1) 1011101010	false
10714	1	1011101110 (1) 1011101100	false
10715	1	0011101110 (1) 0010101110	false
10716	1	0011101110 (1) 0011001110	false
10717	1	0011101110 (1) 0011111110	false
10718	1	0011101110 (1) 0011100110	false
10719	1	0011101110 (1) 0011101010	false
10720	1	0011101110 (1) 0011101100	false
10721	1	0111111101 (1) 0011111101	false
10722	1	0111111101 (1) 0110111101	false
10723	1	1111111101 (1) 1011111101	false
10724	1	1111111101 (1) 1110111101	false
10725	1	0101110011 (1) 0001110011	false
10726	1	0101110011 (1) 0101110111	false
10727	1	0101110011 (1) 0101110001	false
10728	1	0101100111 (1) 0001100111	false
10729	1	0101100111 (1) 0111100111	false
10730	1	0101100111 (1) 0101110111	false
10731	1	0101100111 (1) 0101100101	false
10732	1	0110001111 (1) 0010001111	false
10733	1	0110001111 (1) 0110000111	false
10734	1	1011111101 (1) 1010111101	false
10735	1	1011111101 (1) 1011011101	false
10736	1	0011111101 (1) 0010111101	false
10737	1	0011111101 (1) 0011011101	false
10738	1	1110001111 (1) 1110000111	false
10739	1	1101110011 (1) 1001110011	false
10740	1	1101110011 (1) 1101110111	false
10741	1	1101110011 (1) 1101110001	false
10742	1	1101100111 (1) 1111100111	false
10743	1	1101100111 (1) 1101110111	false
10744	1	1101100111 (1) 1101100101	false
10745	1	1011100011 (1) 1111100011	false
10746	1	1011100011 (1) 1010100011	false
10747	1	1011100011 (1) 1011000011	false
10748	1	1011100011 (1) 1011110011	false
10749	1	1011100011 (1) 1011100111	false
10750	1	1011100011 (1) 1011100001	false
10751	1	1001110011 (1) 1011110011	false
10752	1	1001110011 (1) 1001010011	false
10753	1	1001110011 (1) 1001110111	false
10754	1	1001110011 (1) 1001110001	false
10755	1	1001100111 (1) 1101100111	false
10756	1	1001100111 (1) 1011100111	false
10757	1	1001100111 (1) 1001110111	false
10758	1	1001100111 (1) 1001100101	false
10759	1	0011100011 (1) 0010100011	false
10760	1	0011100011 (1) 0011000011	false
10761	1	0011100011 (1) 0011110011	false
10762	1	0011100011 (1) 0011100111	false
10763	1	0011100011 (1) 0011100001	false
10764	1	0001110011 (1) 0011110011	false
10765	1	0001110011 (1) 0001010011	false
10766	1	0001110011 (1) 0001110111	false
10767	1	0001110011 (1) 0001110001	false
10768	1	0001100111 (1) 0011100111	false
10769	1	0001100111 (1) 0001110111	false
10770	1	0001100111 (1) 0001100101	false
10771	1	1010001111 (1) 1110001111	false
10772	1	1010001111 (1) 1010000111	false
10773	1	0010001111 (1) 0010000111	false
10774	1	0111010111 (1) 0011010111	false
10775	1	0111010111 (1) 0110010111	false
10776	1	0111010111 (1) 0111110111	false
10777	1	0111010111 (1) 0111000111	false
10778	1	1111010111 (1) 1011010111	false
10779	1	1111010111 (1) 1110010111	false
10780	1	1111010111 (1) 1111110111	false
10781	1	1111010111 (1) 1111000111	false
10782	1	0011010111 (1) 0010010111	false
10783	1	0011010111 (1) 0011110111	false
10784	1	0011010111 (1) 0011000111	false
10785	1	0101111101 (1) 0001111101	false
10786	1	0101111101 (1) 0111111101	false
10787	1	1011010111 (1) 1010010111	false
10788	1	1011010111 (1) 1011110111	false
10789	1	1011010111 (1) 1011000111	false
10790	1	1101111101 (1) 1001111101	false
10791	1	1101111101 (1) 1111111101	false
10792	1	0001111101 (1) 0011111101	false
10793	1	0001111101 (1) 0001011101	false
10794	1	0100001111 (1) 0000001111	false
10795	1	0100001111 (1) 0110001111	false
10796	1	0100001111 (1) 0101001111	false
10797	1	0100001111 (1) 0100000111	false
10798	1	1001111101 (1) 1011111101	false
10799	1	1001111101 (1) 1001011101	false
10800	1	1100001111 (1) 1110001111	false
10801	1	1100001111 (1) 1101001111	false
10802	1	1100001111 (1) 1100000111	false
10803	1	0110110011 (1) 0010110011	false
10804	1	0110110011 (1) 0100110011	false
10805	1	0110110011 (1) 0110010011	false
10806	1	0110110011 (1) 0110110111	false
10807	1	0110110011 (1) 0110110001	false
10808	1	0110100111 (1) 0010100111	false
10809	1	0110100111 (1) 0110110111	false
10810	1	0110100111 (1) 0110100101	false
10811	1	0110100011 (1) 0010100011	false
10812	1	0110100011 (1) 0100100011	false
10813	1	0110100011 (1) 0110000011	false
10814	1	0110100011 (1) 0110110011	false
10815	1	0110100011 (1) 0110100111	false
10816	1	0110100011 (1) 0110100001	false
10817	1	1110110011 (1) 1010110011	false
10818	1	1110110011 (1) 1100110011	false
10819	1	1110110011 (1) 1110010011	false
10820	1	1110110011 (1) 1110110111	false
10821	1	1110110011 (1) 1110110001	false
10822	1	1110100111 (1) 1110110111	false
10823	1	1110100111 (1) 1110100101	false
10824	1	1000001111 (1) 1100001111	false
10825	1	1000001111 (1) 1010001111	false
10826	1	1000001111 (1) 1001001111	false
10827	1	1000001111 (1) 1000000111	false
10828	1	0000001111 (1) 0010001111	false
10829	1	0000001111 (1) 0001001111	false
10830	1	0000001111 (1) 0000000111	false
10831	1	0110101110 (1) 0010101110	false
10832	1	0110101110 (1) 0110001110	false
10833	1	0110101110 (1) 0110111110	false
10834	1	0110101110 (1) 0110100110	false
10835	1	0110101110 (1) 0110101010	false
10836	1	0110101110 (1) 0110101100	false
10837	1	0100101110 (1) 0000101110	false
10838	1	0100101110 (1) 0110101110	false
10839	1	0100101110 (1) 0101101110	false
10840	1	0100101110 (1) 0100001110	false
10841	1	0100101110 (1) 0100111110	false
10842	1	0100101110 (1) 0100100110	false
10843	1	0100101110 (1) 0100101010	false
10844	1	0100101110 (1) 0100101100	false
10845	1	1110101110 (1) 1110001110	false
10846	1	1110101110 (1) 1110111110	false
10847	1	1110101110 (1) 1110100110	false
10848	1	1110101110 (1) 1110101010	false
10849	1	1110101110 (1) 1110101100	false
10850	1	1110100011 (1) 1100100011	false
10851	1	1110100011 (1) 1110000011	false
10852	1	1110100011 (1) 1110110011	false
10853	1	1110100011 (1) 1110100111	false
10854	1	1110100011 (1) 1110100001	false
10855	1	1010110011 (1) 1010010011	false
10856	1	1010110011 (1) 1010110111	false
10857	1	1010110011 (1) 1010110001	false
10858	1	1010100111 (1) 1110100111	false
10859	1	1010100111 (1) 1010110111	false
10860	1	1010100111 (1) 1010100101	false
10861	1	0101010111 (1) 0001010111	false
10862	1	0101010111 (1) 0111010111	false
10863	1	0101010111 (1) 0101110111	false
10864	1	0101010111 (1) 0101000111	false
10865	1	0010110011 (1) 0010010011	false
10866	1	0010110011 (1) 0010110111	false
10867	1	0010110011 (1) 0010110001	false
10868	1	0010100111 (1) 0010110111	false
10869	1	0010100111 (1) 0010100101	false
10870	1	1101010111 (1) 1001010111	false
10871	1	1101010111 (1) 1111010111	false
10872	1	1101010111 (1) 1101110111	false
10873	1	1101010111 (1) 1101000111	false
10874	1	1100101110 (1) 1110101110	false
10875	1	1100101110 (1) 1101101110	false
10876	1	1100101110 (1) 1100001110	false
10877	1	1100101110 (1) 1100111110	false
10878	1	1100101110 (1) 1100100110	false
10879	1	1100101110 (1) 1100101010	false
10880	1	1100101110 (1) 1100101100	false
10881	1	1010101110 (1) 1110101110	false
10882	1	1010101110 (1) 1010001110	false
10883	1	1010101110 (1) 1010111110	false
10884	1	1010101110 (1) 1010100110	false
10885	1	1010101110 (1) 1010101010	false
10886	1	1010101110 (1) 1010101100	false
10887	1	1001101110 (1) 1101101110	false
10888	1	1001101110 (1) 1011101110	false
10889	1	1001101110 (1) 1001001110	false
10890	1	1001101110 (1) 1001111110	false
10891	1	1001101110 (1) 1001100110	false
10892	1	1001101110 (1) 1001101010	false
10893	1	1001101110 (1) 1001101100	false
10894	1	1000101110 (1) 1100101110	false
10895	1	1000101110 (1) 1010101110	false
10896	1	1000101110 (1) 1001101110	false
10897	1	1000101110 (1) 1000001110	false
10898	1	1000101110 (1) 1000111110	false
10899	1	1000101110 (1) 1000100110	false
10900	1	1000101110 (1) 1000101010	false
10901	1	1000101110 (1) 1000101100	false
10902	1	0010101110 (1) 0010001110	false
10903	1	0010101110 (1) 0010111110	false
10904	1	0010101110 (1) 0010100110	false
10905	1	0010101110 (1) 0010101010	false
10906	1	0010101110 (1) 0010101100	false
10907	1	0001101110 (1) 0011101110	false
10908	1	0001101110 (1) 0001001110	false
10909	1	0001101110 (1) 0001111110	false
10910	1	0001101110 (1) 0001100110	false
10911	1	0001101110 (1) 0001101010	false
10912	1	0001101110 (1) 0001101100	false
10913	1	0000101110 (1) 0010101110	false
10914	1	0000101110 (1) 0001101110	false
10915	1	0000101110 (1) 0000001110	false
10916	1	0000101110 (1) 0000111110	false
10917	1	0000101110 (1) 0000100110	false
10918	1	0000101110 (1) 0000101010	false
10919	1	0000101110 (1) 0000101100	false
10920	1	0001010111 (1) 0011010111	false
10921	1	0001010111 (1) 0001110111	false
10922	1	0001010111 (1) 0001000111	false
10923	1	1001010111 (1) 1011010111	false
10924	1	1001010111 (1) 1001110111	false
10925	1	1001010111 (1) 1001000111	false
10926	1	0110111101 (1) 0010111101	false
10927	1	0110111101 (1) 0110011101	false
10928	1	1110111101 (1) 1010111101	false
10929	1	1110111101 (1) 1110011101	false
10930	1	0111101110 (1) 0011101110	false
10931	1	0111101110 (1) 0110101110	false
10932	1	0111101110 (1) 0111111110	false
10933	1	0111101110 (1) 0111100110	false
10934	1	0111101110 (1) 0111101010	false
10935	1	0111101110 (1) 0111101100	false
10936	1	1111101110 (1) 1110101110	false
10937	1	1111101110 (1) 1111111110	false
10938	1	1111101110 (1) 1111100110	false
10939	1	1111101110 (1) 1111101010	false
10940	1	1111101110 (1) 1111101100	false
10941	1	0100110011 (1) 0000110011	false
10942	1	0100110011 (1) 0101110011	false
10943	1	0100110011 (1) 0100010011	false
10944	1	0100110011 (1) 0100110111	false
10945	1	0100110011 (1) 0100110001	false
10946	1	0100100111 (1) 0000100111	false
10947	1	0100100111 (1) 0110100111	false
10948	1	0100100111 (1) 0101100111	false
10949	1	0100100111 (1) 0100110111	false
10950	1	0100100111 (1) 0100100101	false
10951	1	0100100011 (1) 0000100011	false
10952	1	0100100011 (1) 0101100011	false
10953	1	0100100011 (1) 0100000011	false
10954	1	0100100011 (1) 0100110011	false
10955	1	0100100011 (1) 0100100111	false
10956	1	0100100011 (1) 0100100001	false
10957	1	0010111101 (1) 0010011101	false
10958	1	1100110011 (1) 1000110011	false
10959	1	1100110011 (1) 1101110011	false
10960	1	1100110011 (1) 1100010011	false
10961	1	1100110011 (1) 1100110111	false
10962	1	1100110011 (1) 1100110001	false
10963	1	1100100111 (1) 1110100111	false
10964	1	1100100111 (1) 1101100111	false
10965	1	1100100111 (1) 1100110111	false
10966	1	1100100111 (1) 1100100101	false
10967	1	1010111101 (1) 1010011101	false
10968	1	1100100011 (1) 1101100011	false
10969	1	1100100011 (1) 1100000011	false
10970	1	1100100011 (1) 1100110011	false
10971	1	1100100011 (1) 1100100111	false
10972	1	1100100011 (1) 1100100001	false
10973	1	1010100011 (1) 1110100011	false
10974	1	1010100011 (1) 1010000011	false
10975	1	1010100011 (1) 1010110011	false
10976	1	1010100011 (1) 1010100111	false
10977	1	1010100011 (1) 1010100001	false
10978	1	1001100011 (1) 1101100011	false
10979	1	1001100011 (1) 1011100011	false
10980	1	1001100011 (1) 1001000011	false
10981	1	1001100011 (1) 1001110011	false
10982	1	1001100011 (1) 1001100111	false
10983	1	1001100011 (1) 1001100001	false
10984	1	1000110011 (1) 1010110011	false
10985	1	1000110011 (1) 1001110011	false
10986	1	1000110011 (1) 1000010011	false
10987	1	1000110011 (1) 1000110111	false
10988	1	1000110011 (1) 1000110001	false
10989	1	1000100111 (1) 1100100111	false
10990	1	1000100111 (1) 1010100111	false
10991	1	1000100111 (1) 1001100111	false
10992	1	1000100111 (1) 1000110111	false
10993	1	1000100111 (1) 1000100101	false
10994	1	1000100011 (1) 1100100011	false
10995	1	1000100011 (1) 1010100011	false
10996	1	1000100011 (1) 1001100011	false
10997	1	1000100011 (1) 1000000011	false
10998	1	1000100011 (1) 1000110011	false
10999	1	1000100011 (1) 1000100111	false
11000	1	1000100011 (1) 1000100001	false
11001	1	0010100011 (1) 0010000011	false
11002	1	0010100011 (1) 0010110011	false
11003	1	0010100011 (1) 0010100111	false
11004	1	0010100011 (1) 0010100001	false
11005	1	0001100011 (1) 0011100011	false
11006	1	0001100011 (1) 0001000011	false
11007	1	0001100011 (1) 0001110011	false
11008	1	0001100011 (1) 0001100111	false
11009	1	0001100011 (1) 0001100001	false
11010	1	0000110011 (1) 0010110011	false
11011	1	0000110011 (1) 0001110011	false
11012	1	0000110011 (1) 0000010011	false
11013	1	0000110011 (1) 0000110111	false
11014	1	0000110011 (1) 0000110001	false
11015	1	0000100111 (1) 0010100111	false
11016	1	0000100111 (1) 0001100111	false
11017	1	0000100111 (1) 0000110111	false
11018	1	0000100111 (1) 0000100101	false
11019	1	0000100011 (1) 0010100011	false
11020	1	0000100011 (1) 0001100011	false
11021	1	0000100011 (1) 0000000011	false
11022	1	0000100011 (1) 0000110011	false
11023	1	0000100011 (1) 0000100111	false
11024	1	0000100011 (1) 0000100001	false
11025	1	0110010111 (1) 0010010111	false
11026	1	0110010111 (1) 0110110111	false
11027	1	0110010111 (1) 0110000111	false
11028	1	1110010111 (1) 1010010111	false
11029	1	1110010111 (1) 1110110111	false
11030	1	1110010111 (1) 1110000111	false
11031	1	0100111101 (1) 0000111101	false
11032	1	0100111101 (1) 0110111101	false
11033	1	0100111101 (1) 0101111101	false
11034	1	0100111101 (1) 0100011101	false
11035	1	1010010111 (1) 1010110111	false
11036	1	1010010111 (1) 1010000111	false
11037	1	1111100011 (1) 1101100011	false
11038	1	1111100011 (1) 1110100011	false
11039	1	1111100011 (1) 1111110011	false
11040	1	1111100011 (1) 1111100111	false
11041	1	1111100011 (1) 1111100001	false
11042	1	0101101110 (1) 0001101110	false
11043	1	0101101110 (1) 0111101110	false
11044	1	0101101110 (1) 0101111110	false
11045	1	0101101110 (1) 0101100110	false
11046	1	0101101110 (1) 0101101010	false
11047	1	0101101110 (1) 0101101100	false
11048	1	0111100011 (1) 0011100011	false
11049	1	0111100011 (1) 0101100011	false
11050	1	0111100011 (1) 0110100011	false
11051	1	0111100011 (1) 0111110011	false
11052	1	0111100011 (1) 0111100111	false
11053	1	0111100011 (1) 0111100001	false
11054	1	1100111101 (1) 1000111101	false
11055	1	1100111101 (1) 1110111101	false
11056	1	1100111101 (1) 1101111101	false
11057	1	1100111101 (1) 1100011101	false
11058	1	1101101110 (1) 1111101110	false
11059	1	1101101110 (1) 1101111110	false
11060	1	1101101110 (1) 1101100110	false
11061	1	1101101110 (1) 1101101010	false
11062	1	1101101110 (1) 1101101100	false
11063	1	0010010111 (1) 0010110111	false
11064	1	0010010111 (1) 0010000111	false
11065	1	0000111101 (1) 0010111101	false
11066	1	0000111101 (1) 0001111101	false
11067	1	0000111101 (1) 0000011101	false
11068	1	1000111101 (1) 1010111101	false
11069	1	1000111101 (1) 1001111101	false
11070	1	1000111101 (1) 1000011101	false
11071	1	1111011101 (1) 1011011101	false
11072	1	1111011101 (1) 1110011101	false
11073	1	1111011101 (1) 1111111101	false
11074	1	1111011101 (1) 1111001101	false
11075	1	1111011101 (1) 1111011111	false
11076	1	1111011011 (1) 1011011011	false
11077	1	1111011011 (1) 1101011011	false
11078	1	1111011011 (1) 1110011011	false
11079	1	1111011011 (1) 1111111011	false
11080	1	1111011011 (1) 1111001011	false
11081	1	1111011011 (1) 1111010011	false
11082	1	1111011011 (1) 1111011111	false
11083	1	0111011101 (1) 0011011101	false
11084	1	0111011101 (1) 0110011101	false
11085	1	0111011101 (1) 0111111101	false
11086	1	0111011101 (1) 0111001101	false
11087	1	0111011101 (1) 0111011111	false
11088	1	0111011011 (1) 0011011011	false
11089	1	0111011011 (1) 0101011011	false
11090	1	0111011011 (1) 0110011011	false
11091	1	0111011011 (1) 0111111011	false
11092	1	0111011011 (1) 0111001011	false
11093	1	0111011011 (1) 0111010011	false
11094	1	0111011011 (1) 0111011111	false
11095	1	0100010111 (1) 0000010111	false
11096	1	0100010111 (1) 0110010111	false
11097	1	0100010111 (1) 0101010111	false
11098	1	0100010111 (1) 0100110111	false
11099	1	0100010111 (1) 0100000111	false
11100	1	1100010111 (1) 1000010111	false
11101	1	1100010111 (1) 1110010111	false
11102	1	1100010111 (1) 1101010111	false
11103	1	1100010111 (1) 1100110111	false
11104	1	1100010111 (1) 1100000111	false
11105	1	0101100011 (1) 0001100011	false
11106	1	0101100011 (1) 0101110011	false
11107	1	0101100011 (1) 0101100111	false
11108	1	0101100011 (1) 0101100001	false
11109	1	0000010111 (1) 0010010111	false
11110	1	0000010111 (1) 0001010111	false
11111	1	0000010111 (1) 0000110111	false
11112	1	0000010111 (1) 0000000111	false
11113	1	1101100011 (1) 1101110011	false
11114	1	1101100011 (1) 1101100111	false
11115	1	1101100011 (1) 1101100001	false
11116	1	0111111110 (1) 0011111110	false
11117	1	0111111110 (1) 0110111110	false
11118	1	0111111110 (1) 0111110110	false
11119	1	0111111110 (1) 0111111100	false
11120	1	0011011101 (1) 0010011101	false
11121	1	0011011101 (1) 0011001101	false
11122	1	0011011101 (1) 0011011111	false
11123	1	0011011011 (1) 0001011011	false
11124	1	0011011011 (1) 0010011011	false
11125	1	0011011011 (1) 0011001011	false
11126	1	0011011011 (1) 0011010011	false
11127	1	0011011011 (1) 0011011111	false
11128	1	1000010111 (1) 1010010111	false
11129	1	1000010111 (1) 1001010111	false
11130	1	1000010111 (1) 1000110111	false
11131	1	1000010111 (1) 1000000111	false
11132	1	1111111110 (1) 1011111110	false
11133	1	1111111110 (1) 1110111110	false
11134	1	1111111110 (1) 1111110110	false
11135	1	1111111110 (1) 1111111100	false
11136	1	1011011101 (1) 1010011101	false
11137	1	1011011101 (1) 1011001101	false
11138	1	1011011101 (1) 1011011111	false
11139	1	1011011011 (1) 1001011011	false
11140	1	1011011011 (1) 1010011011	false
11141	1	1011011011 (1) 1011001011	false
11142	1	1011011011 (1) 1011010011	false
11143	1	1011011011 (1) 1011011111	false
11144	1	0011111110 (1) 0010111110	false
11145	1	0011111110 (1) 0011011110	false
11146	1	0011111110 (1) 0011110110	false
11147	1	0011111110 (1) 0011111100	false
11148	1	1011111110 (1) 1010111110	false
11149	1	1011111110 (1) 1011011110	false
11150	1	1011111110 (1) 1011110110	false
11151	1	1011111110 (1) 1011111100	false
11152	1	0101011101 (1) 0001011101	false
11153	1	0101011101 (1) 0111011101	false
11154	1	0101011101 (1) 0101111101	false
11155	1	0101011101 (1) 0101001101	false
11156	1	0101011101 (1) 0101011111	false
11157	1	0101011011 (1) 0001011011	false
11158	1	0101011011 (1) 0101111011	false
11159	1	0101011011 (1) 0101001011	false
11160	1	0101011011 (1) 0101010011	false
11161	1	0101011011 (1) 0101011111	false
11162	1	1101011101 (1) 1001011101	false
11163	1	1101011101 (1) 1111011101	false
11164	1	1101011101 (1) 1101111101	false
11165	1	1101011101 (1) 1101001101	false
11166	1	1101011101 (1) 1101011111	false
11167	1	1101011011 (1) 1001011011	false
11168	1	1101011011 (1) 1101111011	false
11169	1	1101011011 (1) 1101001011	false
11170	1	1101011011 (1) 1101010011	false
11171	1	1101011011 (1) 1101011111	false
11172	1	0001011101 (1) 0011011101	false
11173	1	0001011101 (1) 0001001101	false
11174	1	0001011101 (1) 0001011111	false
11175	1	0001011011 (1) 0001001011	false
11176	1	0001011011 (1) 0001010011	false
11177	1	0001011011 (1) 0001011111	false
11178	1	1001011101 (1) 1011011101	false
11179	1	1001011101 (1) 1001001101	false
11180	1	1001011101 (1) 1001011111	false
11181	1	1001011011 (1) 1001001011	false
11182	1	1001011011 (1) 1001010011	false
11183	1	1001011011 (1) 1001011111	false
11184	1	0101111110 (1) 0001111110	false
11185	1	0101111110 (1) 0111111110	false
11186	1	0101111110 (1) 0101110110	false
11187	1	0101111110 (1) 0101111100	false
11188	1	1101111110 (1) 1001111110	false
11189	1	1101111110 (1) 1111111110	false
11190	1	1101111110 (1) 1101110110	false
11191	1	1101111110 (1) 1101111100	false
11192	1	0001111110 (1) 0011111110	false
11193	1	0001111110 (1) 0001011110	false
11194	1	0001111110 (1) 0001110110	false
11195	1	0001111110 (1) 0001111100	false
11196	1	1001111110 (1) 1011111110	false
11197	1	1001111110 (1) 1001011110	false
11198	1	1001111110 (1) 1001110110	false
11199	1	1001111110 (1) 1001111100	false
11200	1	0111101101 (1) 0011101101	false
11201	1	0111101101 (1) 0110101101	false
11202	1	0111101101 (1) 0111111101	false
11203	1	0111101101 (1) 0111100101	false
11204	1	0110011101 (1) 0010011101	false
11205	1	0110011101 (1) 0110001101	false
11206	1	0110011101 (1) 0110011111	false
11207	1	0110011011 (1) 0010011011	false
11208	1	0110011011 (1) 0100011011	false
11209	1	0110011011 (1) 0110001011	false
11210	1	0110011011 (1) 0110010011	false
11211	1	0110011011 (1) 0110011111	false
11212	1	1111101101 (1) 1110101101	false
11213	1	1111101101 (1) 1111111101	false
11214	1	1111101101 (1) 1111100101	false
11215	1	1110011101 (1) 1010011101	false
11216	1	1110011101 (1) 1110001101	false
11217	1	1110011101 (1) 1110011111	false
11218	1	1110011011 (1) 1010011011	false
11219	1	1110011011 (1) 1100011011	false
11220	1	1110011011 (1) 1110001011	false
11221	1	1110011011 (1) 1110010011	false
11222	1	1110011011 (1) 1110011111	false
11223	1	0010011101 (1) 0010001101	false
11224	1	0010011101 (1) 0010011111	false
11225	1	0010011011 (1) 0000011011	false
11226	1	0010011011 (1) 0010001011	false
11227	1	0010011011 (1) 0010010011	false
11228	1	0010011011 (1) 0010011111	false
11229	1	0011101101 (1) 0010101101	false
11230	1	0011101101 (1) 0011001101	false
11231	1	0011101101 (1) 0011111101	false
11232	1	0011101101 (1) 0011100101	false
11233	1	1011101101 (1) 1111101101	false
11234	1	1011101101 (1) 1010101101	false
11235	1	1011101101 (1) 1011001101	false
11236	1	1011101101 (1) 1011111101	false
11237	1	1011101101 (1) 1011100101	false
11238	1	1010011101 (1) 1010001101	false
11239	1	1010011101 (1) 1010011111	false
11240	1	1010011011 (1) 1000011011	false
11241	1	1010011011 (1) 1010001011	false
11242	1	1010011011 (1) 1010010011	false
11243	1	1010011011 (1) 1010011111	false
11244	1	0110111110 (1) 0010111110	false
11245	1	0110111110 (1) 0110011110	false
11246	1	0110111110 (1) 0110110110	false
11247	1	0110111110 (1) 0110111100	false
11248	1	1110111110 (1) 1010111110	false
11249	1	1110111110 (1) 1110011110	false
11250	1	1110111110 (1) 1110110110	false
11251	1	1110111110 (1) 1110111100	false
11252	1	0010111110 (1) 0010011110	false
11253	1	0010111110 (1) 0010110110	false
11254	1	0010111110 (1) 0010111100	false
11255	1	1010111110 (1) 1010011110	false
11256	1	1010111110 (1) 1010110110	false
11257	1	1010111110 (1) 1010111100	false
11258	1	0111000111 (1) 0011000111	false
11259	1	0111000111 (1) 0110000111	false
11260	1	0111000111 (1) 0111100111	false
11261	1	1111000111 (1) 1110000111	false
11262	1	1111000111 (1) 1111100111	false
11263	1	0101101101 (1) 0001101101	false
11264	1	0101101101 (1) 0111101101	false
11265	1	0101101101 (1) 0101111101	false
11266	1	0101101101 (1) 0101100101	false
11267	1	1100011101 (1) 1000011101	false
11268	1	1100011101 (1) 1110011101	false
11269	1	1100011101 (1) 1101011101	false
11270	1	1100011101 (1) 1100001101	false
11271	1	1100011101 (1) 1100011111	false
11272	1	1100011011 (1) 1000011011	false
11273	1	1100011011 (1) 1101011011	false
11274	1	1100011011 (1) 1100001011	false
11275	1	1100011011 (1) 1100010011	false
11276	1	1100011011 (1) 1100011111	false
11277	1	1101101101 (1) 1111101101	false
11278	1	1101101101 (1) 1101111101	false
11279	1	1101101101 (1) 1101100101	false
11280	1	1011000111 (1) 1111000111	false
11281	1	1011000111 (1) 1010000111	false
11282	1	1011000111 (1) 1011100111	false
11283	1	0011000111 (1) 0010000111	false
11284	1	0011000111 (1) 0011100111	false
11285	1	0100011101 (1) 0000011101	false
11286	1	0100011101 (1) 0110011101	false
11287	1	0100011101 (1) 0101011101	false
11288	1	0100011101 (1) 0100001101	false
11289	1	0100011101 (1) 0100011111	false
11290	1	0100011011 (1) 0000011011	false
11291	1	0100011011 (1) 0101011011	false
11292	1	0100011011 (1) 0100001011	false
11293	1	0100011011 (1) 0100010011	false
11294	1	0100011011 (1) 0100011111	false
11295	1	0111110110 (1) 0011110110	false
11296	1	0111110110 (1) 0110110110	false
11297	1	0111110110 (1) 0111110010	false
11298	1	0111110110 (1) 0111110100	false
11299	1	1111110110 (1) 1011110110	false
11300	1	1111110110 (1) 1110110110	false
11301	1	1111110110 (1) 1111110010	false
11302	1	1111110110 (1) 1111110100	false
11303	1	1011101001 (1) 1111101001	false
11304	1	1011101001 (1) 1010101001	false
11305	1	1011101001 (1) 1011001001	false
11306	1	1011101001 (1) 1011111001	false
11307	1	1011101001 (1) 1011100001	false
11308	1	1011101001 (1) 1011101101	false
11309	1	1001101101 (1) 1101101101	false
11310	1	1001101101 (1) 1011101101	false
11311	1	1001101101 (1) 1001001101	false
11312	1	1001101101 (1) 1001111101	false
11313	1	1001101101 (1) 1001100101	false
11314	1	0011101001 (1) 0010101001	false
11315	1	0011101001 (1) 0011001001	false
11316	1	0011101001 (1) 0011111001	false
11317	1	0011101001 (1) 0011100001	false
11318	1	0011101001 (1) 0011101101	false
11319	1	0001101101 (1) 0011101101	false
11320	1	0001101101 (1) 0001001101	false
11321	1	0001101101 (1) 0001111101	false
11322	1	0001101101 (1) 0001100101	false
11323	1	0000011101 (1) 0010011101	false
11324	1	0000011101 (1) 0001011101	false
11325	1	0000011101 (1) 0000001101	false
11326	1	0000011101 (1) 0000011111	false
11327	1	0000011011 (1) 0001011011	false
11328	1	0000011011 (1) 0000001011	false
11329	1	0000011011 (1) 0000010011	false
11330	1	0000011011 (1) 0000011111	false
11331	1	1000011101 (1) 1010011101	false
11332	1	1000011101 (1) 1001011101	false
11333	1	1000011101 (1) 1000001101	false
11334	1	1000011101 (1) 1000011111	false
11335	1	1000011011 (1) 1001011011	false
11336	1	1000011011 (1) 1000001011	false
11337	1	1000011011 (1) 1000010011	false
11338	1	1000011011 (1) 1000011111	false
11339	1	0100111110 (1) 0000111110	false
11340	1	0100111110 (1) 0110111110	false
11341	1	0100111110 (1) 0101111110	false
11342	1	0100111110 (1) 0100011110	false
11343	1	0100111110 (1) 0100110110	false
11344	1	0100111110 (1) 0100111100	false
11345	1	0011110110 (1) 0010110110	false
11346	1	0011110110 (1) 0011110010	false
11347	1	0011110110 (1) 0011110100	false
11348	1	1100111110 (1) 1000111110	false
11349	1	1100111110 (1) 1110111110	false
11350	1	1100111110 (1) 1101111110	false
11351	1	1100111110 (1) 1100011110	false
11352	1	1100111110 (1) 1100110110	false
11353	1	1100111110 (1) 1100111100	false
11354	1	1011110110 (1) 1010110110	false
11355	1	1011110110 (1) 1011110010	false
11356	1	1011110110 (1) 1011110100	false
11357	1	0000111110 (1) 0010111110	false
11358	1	0000111110 (1) 0001111110	false
11359	1	0000111110 (1) 0000011110	false
11360	1	0000111110 (1) 0000110110	false
11361	1	0000111110 (1) 0000111100	false
11362	1	1000111110 (1) 1010111110	false
11363	1	1000111110 (1) 1001111110	false
11364	1	1000111110 (1) 1000011110	false
11365	1	1000111110 (1) 1000110110	false
11366	1	1000111110 (1) 1000111100	false
11367	1	0101000111 (1) 0001000111	false
11368	1	0101000111 (1) 0111000111	false
11369	1	0101000111 (1) 0101100111	false
11370	1	1101000111 (1) 1111000111	false
11371	1	1101000111 (1) 1101100111	false
11372	1	0001000111 (1) 0011000111	false
11373	1	0001000111 (1) 0001100111	false
11374	1	1001000111 (1) 1101000111	false
11375	1	1001000111 (1) 1011000111	false
11376	1	1001000111 (1) 1001100111	false
11377	1	0101110110 (1) 0001110110	false
11378	1	0101110110 (1) 0111110110	false
11379	1	0101110110 (1) 0101110010	false
11380	1	0101110110 (1) 0101110100	false
11381	1	1101110110 (1) 1001110110	false
11382	1	1101110110 (1) 1111110110	false
11383	1	1101110110 (1) 1101110010	false
11384	1	1101110110 (1) 1101110100	false
11385	1	0110101101 (1) 0010101101	false
11386	1	0110101101 (1) 0110001101	false
11387	1	0110101101 (1) 0110111101	false
11388	1	0110101101 (1) 0110100101	false
11389	1	0110101001 (1) 0010101001	false
11390	1	0110101001 (1) 0100101001	false
11391	1	0110101001 (1) 0110001001	false
11392	1	0110101001 (1) 0110111001	false
11393	1	0110101001 (1) 0110100001	false
11394	1	0110101001 (1) 0110101101	false
11395	1	1110101101 (1) 1110001101	false
11396	1	1110101101 (1) 1110111101	false
11397	1	1110101101 (1) 1110100101	false
11398	1	0001110110 (1) 0011110110	false
11399	1	0001110110 (1) 0001110010	false
11400	1	0001110110 (1) 0001110100	false
11401	1	1001110110 (1) 1011110110	false
11402	1	1001110110 (1) 1001110010	false
11403	1	1001110110 (1) 1001110100	false
11404	1	1110101001 (1) 1100101001	false
11405	1	1110101001 (1) 1110001001	false
11406	1	1110101001 (1) 1110111001	false
11407	1	1110101001 (1) 1110100001	false
11408	1	1110101001 (1) 1110101101	false
11409	1	1010101101 (1) 1110101101	false
11410	1	1010101101 (1) 1010001101	false
11411	1	1010101101 (1) 1010111101	false
11412	1	1010101101 (1) 1010100101	false
11413	1	0010101101 (1) 0010001101	false
11414	1	0010101101 (1) 0010111101	false
11415	1	0010101101 (1) 0010100101	false
11416	1	0111111001 (1) 0011111001	false
11417	1	0111111001 (1) 0101111001	false
11418	1	0111111001 (1) 0110111001	false
11419	1	0111111001 (1) 0111111101	false
11420	1	0111110101 (1) 0011110101	false
11421	1	0111110101 (1) 0110110101	false
11422	1	0111110101 (1) 0111111101	false
11423	1	1111111001 (1) 1011111001	false
11424	1	1111111001 (1) 1101111001	false
11425	1	1111111001 (1) 1110111001	false
11426	1	1111111001 (1) 1111111101	false
11427	1	1111110101 (1) 1011110101	false
11428	1	1111110101 (1) 1110110101	false
11429	1	1111110101 (1) 1111111101	false
11430	1	0011111001 (1) 0010111001	false
11431	1	0011111001 (1) 0011011001	false
11432	1	0011111001 (1) 0011111101	false
11433	1	0011110101 (1) 0010110101	false
11434	1	0011110101 (1) 0011111101	false
11435	1	0110000111 (1) 0010000111	false
11436	1	0110000111 (1) 0110100111	false
11437	1	1011111001 (1) 1010111001	false
11438	1	1011111001 (1) 1011011001	false
11439	1	1011111001 (1) 1011111101	false
11440	1	1011110101 (1) 1010110101	false
11441	1	1011110101 (1) 1011111101	false
11442	1	1110000111 (1) 1110100111	false
11443	1	0100101101 (1) 0000101101	false
11444	1	0100101101 (1) 0110101101	false
11445	1	0100101101 (1) 0101101101	false
11446	1	0100101101 (1) 0100001101	false
11447	1	0100101101 (1) 0100111101	false
11448	1	0100101101 (1) 0100100101	false
11449	1	0100101001 (1) 0000101001	false
11450	1	0100101001 (1) 0101101001	false
11451	1	0100101001 (1) 0100001001	false
11452	1	0100101001 (1) 0100111001	false
11453	1	0100101001 (1) 0100100001	false
11454	1	0100101001 (1) 0100101101	false
11455	1	1100101101 (1) 1110101101	false
11456	1	1100101101 (1) 1101101101	false
11457	1	1100101101 (1) 1100001101	false
11458	1	1100101101 (1) 1100111101	false
11459	1	1100101101 (1) 1100100101	false
11460	1	1010000111 (1) 1110000111	false
11461	1	1010000111 (1) 1010100111	false
11462	1	0010000111 (1) 0010100111	false
11463	1	0110110110 (1) 0010110110	false
11464	1	0110110110 (1) 0110110010	false
11465	1	0110110110 (1) 0110110100	false
11466	1	1110110110 (1) 1010110110	false
11467	1	1110110110 (1) 1110110010	false
11468	1	1110110110 (1) 1110110100	false
11469	1	1100101001 (1) 1101101001	false
11470	1	1100101001 (1) 1100001001	false
11471	1	1100101001 (1) 1100111001	false
11472	1	1100101001 (1) 1100100001	false
11473	1	1100101001 (1) 1100101101	false
11474	1	1010101001 (1) 1110101001	false
11475	1	1010101001 (1) 1010001001	false
11476	1	1010101001 (1) 1010111001	false
11477	1	1010101001 (1) 1010100001	false
11478	1	1010101001 (1) 1010101101	false
11479	1	1001101001 (1) 1101101001	false
11480	1	1001101001 (1) 1011101001	false
11481	1	1001101001 (1) 1001001001	false
11482	1	1001101001 (1) 1001111001	false
11483	1	1001101001 (1) 1001100001	false
11484	1	1001101001 (1) 1001101101	false
11485	1	1000101101 (1) 1100101101	false
11486	1	1000101101 (1) 1010101101	false
11487	1	1000101101 (1) 1001101101	false
11488	1	1000101101 (1) 1000001101	false
11489	1	1000101101 (1) 1000111101	false
11490	1	1000101101 (1) 1000100101	false
11491	1	1000101001 (1) 1100101001	false
11492	1	1000101001 (1) 1010101001	false
11493	1	1000101001 (1) 1001101001	false
11494	1	1000101001 (1) 1000001001	false
11495	1	1000101001 (1) 1000111001	false
11496	1	1000101001 (1) 1000100001	false
11497	1	1000101001 (1) 1000101101	false
11498	1	0010101001 (1) 0010001001	false
11499	1	0010101001 (1) 0010111001	false
11500	1	0010101001 (1) 0010100001	false
11501	1	0010101001 (1) 0010101101	false
11502	1	0001101001 (1) 0011101001	false
11503	1	0001101001 (1) 0001001001	false
11504	1	0001101001 (1) 0001111001	false
11505	1	0001101001 (1) 0001100001	false
11506	1	0001101001 (1) 0001101101	false
11507	1	0000101101 (1) 0010101101	false
11508	1	0000101101 (1) 0001101101	false
11509	1	0000101101 (1) 0000001101	false
11510	1	0000101101 (1) 0000111101	false
11511	1	0000101101 (1) 0000100101	false
11512	1	0000101001 (1) 0010101001	false
11513	1	0000101001 (1) 0001101001	false
11514	1	0000101001 (1) 0000001001	false
11515	1	0000101001 (1) 0000111001	false
11516	1	0000101001 (1) 0000100001	false
11517	1	0000101001 (1) 0000101101	false
11518	1	0010110110 (1) 0010110010	false
11519	1	0010110110 (1) 0010110100	false
11520	1	1010110110 (1) 1010110010	false
11521	1	1010110110 (1) 1010110100	false
11522	1	0101111001 (1) 0001111001	false
11523	1	0101111001 (1) 0101111101	false
11524	1	0101110101 (1) 0001110101	false
11525	1	0101110101 (1) 0111110101	false
11526	1	0101110101 (1) 0101111101	false
11527	1	1101111001 (1) 1001111001	false
11528	1	1101111001 (1) 1101111101	false
11529	1	1101110101 (1) 1001110101	false
11530	1	1101110101 (1) 1111110101	false
11531	1	1101110101 (1) 1101111101	false
11532	1	0111101001 (1) 0011101001	false
11533	1	0111101001 (1) 0101101001	false
11534	1	0111101001 (1) 0110101001	false
11535	1	0111101001 (1) 0111111001	false
11536	1	0111101001 (1) 0111100001	false
11537	1	0111101001 (1) 0111101101	false
11538	1	0111001101 (1) 0011001101	false
11539	1	0111001101 (1) 0110001101	false
11540	1	0111001101 (1) 0111101101	false
11541	1	0111001101 (1) 0111000101	false
11542	1	0111001101 (1) 0111001111	false
11543	1	0111001011 (1) 0011001011	false
11544	1	0111001011 (1) 0101001011	false
11545	1	0111001011 (1) 0110001011	false
11546	1	0111001011 (1) 0111101011	false
11547	1	0111001011 (1) 0111000011	false
11548	1	0111001011 (1) 0111001111	false
11549	1	0111001001 (1) 0011001001	false
11550	1	0111001001 (1) 0101001001	false
11551	1	0111001001 (1) 0110001001	false
11552	1	0111001001 (1) 0111101001	false
11553	1	0111001001 (1) 0111000001	false
11554	1	0111001001 (1) 0111001101	false
11555	1	0111001001 (1) 0111001011	false
11556	1	0001111001 (1) 0011111001	false
11557	1	0001111001 (1) 0001011001	false
11558	1	0001111001 (1) 0001111101	false
11559	1	0001110101 (1) 0011110101	false
11560	1	0001110101 (1) 0001111101	false
11561	1	0100000111 (1) 0000000111	false
11562	1	0100000111 (1) 0110000111	false
11563	1	0100000111 (1) 0101000111	false
11564	1	0100000111 (1) 0100100111	false
11565	1	1111101001 (1) 1101101001	false
11566	1	1111101001 (1) 1110101001	false
11567	1	1111101001 (1) 1111111001	false
11568	1	1111101001 (1) 1111100001	false
11569	1	1111101001 (1) 1111101101	false
11570	1	1111001101 (1) 1110001101	false
11571	1	1111001101 (1) 1111101101	false
11572	1	1111001101 (1) 1111000101	false
11573	1	1111001101 (1) 1111001111	false
11574	1	1111001011 (1) 1101001011	false
11575	1	1111001011 (1) 1110001011	false
11576	1	1111001011 (1) 1111101011	false
11577	1	1111001011 (1) 1111000011	false
11578	1	1111001011 (1) 1111001111	false
11579	1	1001111001 (1) 1011111001	false
11580	1	1001111001 (1) 1001011001	false
11581	1	1001111001 (1) 1001111101	false
11582	1	1001110101 (1) 1011110101	false
11583	1	1001110101 (1) 1001111101	false
11584	1	1100000111 (1) 1110000111	false
11585	1	1100000111 (1) 1101000111	false
11586	1	1100000111 (1) 1100100111	false
11587	1	0111111010 (1) 0011111010	false
11588	1	0111111010 (1) 0101111010	false
11589	1	0111111010 (1) 0110111010	false
11590	1	0111111010 (1) 0111110010	false
11591	1	0111111010 (1) 0111111110	false
11592	1	0111111010 (1) 0111111000	false
11593	1	1111001001 (1) 1101001001	false
11594	1	1111001001 (1) 1110001001	false
11595	1	1111001001 (1) 1111101001	false
11596	1	1111001001 (1) 1111000001	false
11597	1	1111001001 (1) 1111001101	false
11598	1	1111001001 (1) 1111001011	false
11599	1	1011001101 (1) 1111001101	false
11600	1	1011001101 (1) 1010001101	false
11601	1	1011001101 (1) 1011000101	false
11602	1	1011001101 (1) 1011001111	false
11603	1	1011001011 (1) 1111001011	false
11604	1	1011001011 (1) 1001001011	false
11605	1	1011001011 (1) 1010001011	false
11606	1	1011001011 (1) 1011000011	false
11607	1	1011001011 (1) 1011001111	false
11608	1	1011001001 (1) 1111001001	false
11609	1	1011001001 (1) 1001001001	false
11610	1	1011001001 (1) 1010001001	false
11611	1	1011001001 (1) 1011000001	false
11612	1	1011001001 (1) 1011001101	false
11613	1	1011001001 (1) 1011001011	false
11614	1	0000000111 (1) 0010000111	false
11615	1	0000000111 (1) 0001000111	false
11616	1	0000000111 (1) 0000100111	false
11617	1	0100110110 (1) 0000110110	false
11618	1	0100110110 (1) 0110110110	false
11619	1	0100110110 (1) 0101110110	false
11620	1	0100110110 (1) 0100110010	false
11621	1	0100110110 (1) 0100110100	false
11622	1	0011001101 (1) 0010001101	false
11623	1	0011001101 (1) 0011000101	false
11624	1	0011001101 (1) 0011001111	false
11625	1	0011001011 (1) 0001001011	false
11626	1	0011001011 (1) 0010001011	false
11627	1	0011001011 (1) 0011000011	false
11628	1	0011001011 (1) 0011001111	false
11629	1	0011001001 (1) 0001001001	false
11630	1	0011001001 (1) 0010001001	false
11631	1	0011001001 (1) 0011000001	false
11632	1	0011001001 (1) 0011001101	false
11633	1	0011001001 (1) 0011001011	false
11634	1	1000000111 (1) 1100000111	false
11635	1	1000000111 (1) 1010000111	false
11636	1	1000000111 (1) 1001000111	false
11637	1	1000000111 (1) 1000100111	false
11638	1	1111111010 (1) 1011111010	false
11639	1	1111111010 (1) 1101111010	false
11640	1	1111111010 (1) 1110111010	false
11641	1	1111111010 (1) 1111110010	false
11642	1	1111111010 (1) 1111111110	false
11643	1	1111111010 (1) 1111111000	false
11644	1	1100110110 (1) 1000110110	false
11645	1	1100110110 (1) 1110110110	false
11646	1	1100110110 (1) 1101110110	false
11647	1	1100110110 (1) 1100110010	false
11648	1	1100110110 (1) 1100110100	false
11649	1	1011111010 (1) 1010111010	false
11650	1	1011111010 (1) 1011011010	false
11651	1	1011111010 (1) 1011110010	false
11652	1	1011111010 (1) 1011111110	false
11653	1	1011111010 (1) 1011111000	false
11654	1	0011111010 (1) 0010111010	false
11655	1	0011111010 (1) 0011011010	false
11656	1	0011111010 (1) 0011110010	false
11657	1	0011111010 (1) 0011111110	false
11658	1	0011111010 (1) 0011111000	false
11659	1	0000110110 (1) 0010110110	false
11660	1	0000110110 (1) 0001110110	false
11661	1	0000110110 (1) 0000110010	false
11662	1	0000110110 (1) 0000110100	false
11663	1	1000110110 (1) 1010110110	false
11664	1	1000110110 (1) 1001110110	false
11665	1	1000110110 (1) 1000110010	false
11666	1	1000110110 (1) 1000110100	false
11667	1	0110111001 (1) 0010111001	false
11668	1	0110111001 (1) 0100111001	false
11669	1	0110111001 (1) 0110011001	false
11670	1	0110111001 (1) 0110111101	false
11671	1	0110110101 (1) 0010110101	false
11672	1	0110110101 (1) 0110111101	false
11673	1	0101101001 (1) 0001101001	false
11674	1	0101101001 (1) 0101111001	false
11675	1	0101101001 (1) 0101100001	false
11676	1	0101101001 (1) 0101101101	false
11677	1	0101001101 (1) 0001001101	false
11678	1	0101001101 (1) 0111001101	false
11679	1	0101001101 (1) 0101101101	false
11680	1	0101001101 (1) 0101000101	false
11681	1	0101001101 (1) 0101001111	false
11682	1	0101001011 (1) 0001001011	false
11683	1	0101001011 (1) 0101101011	false
11684	1	0101001011 (1) 0101000011	false
11685	1	0101001011 (1) 0101001111	false
11686	1	1110111001 (1) 1010111001	false
11687	1	1110111001 (1) 1100111001	false
11688	1	1110111001 (1) 1110011001	false
11689	1	1110111001 (1) 1110111101	false
11690	1	1110110101 (1) 1010110101	false
11691	1	1110110101 (1) 1110111101	false
11692	1	1101101001 (1) 1101111001	false
11693	1	1101101001 (1) 1101100001	false
11694	1	1101101001 (1) 1101101101	false
11695	1	1101001101 (1) 1111001101	false
11696	1	1101001101 (1) 1101101101	false
11697	1	1101001101 (1) 1101000101	false
11698	1	1101001101 (1) 1101001111	false
11699	1	1101001011 (1) 1101101011	false
11700	1	1101001011 (1) 1101000011	false
11701	1	1101001011 (1) 1101001111	false
11702	1	0111100110 (1) 0011100110	false
11703	1	0111100110 (1) 0110100110	false
11704	1	0111100110 (1) 0111110110	false
11705	1	0111100110 (1) 0111100010	false
11706	1	0111100110 (1) 0111100100	false
11707	1	1111100110 (1) 1110100110	false
11708	1	1111100110 (1) 1111110110	false
11709	1	1111100110 (1) 1111100010	false
11710	1	1111100110 (1) 1111100100	false
11711	1	0101111010 (1) 0001111010	false
11712	1	0101111010 (1) 0101110010	false
11713	1	0101111010 (1) 0101111110	false
11714	1	0101111010 (1) 0101111000	false
11715	1	0011100110 (1) 0010100110	false
11716	1	0011100110 (1) 0011110110	false
11717	1	0011100110 (1) 0011100010	false
11718	1	0011100110 (1) 0011100100	false
11719	1	1010111001 (1) 1010011001	false
11720	1	1010111001 (1) 1010111101	false
11721	1	1010110101 (1) 1010111101	false
11722	1	0001001101 (1) 0011001101	false
11723	1	0001001101 (1) 0001000101	false
11724	1	0001001101 (1) 0001001111	false
11725	1	0001001011 (1) 0001000011	false
11726	1	0001001011 (1) 0001001111	false
11727	1	1011100110 (1) 1111100110	false
11728	1	1011100110 (1) 1010100110	false
11729	1	1011100110 (1) 1011110110	false
11730	1	1011100110 (1) 1011100010	false
11731	1	1011100110 (1) 1011100100	false
11732	1	1001001101 (1) 1101001101	false
11733	1	1001001101 (1) 1011001101	false
11734	1	1001001101 (1) 1001000101	false
11735	1	1001001101 (1) 1001001111	false
11736	1	1001001011 (1) 1101001011	false
11737	1	1001001011 (1) 1001000011	false
11738	1	1001001011 (1) 1001001111	false
11739	1	0010111001 (1) 0010011001	false
11740	1	0010111001 (1) 0010111101	false
11741	1	0010110101 (1) 0010111101	false
11742	1	1101111010 (1) 1001111010	false
11743	1	1101111010 (1) 1101110010	false
11744	1	1101111010 (1) 1101111110	false
11745	1	1101111010 (1) 1101111000	false
11746	1	1011101010 (1) 1111101010	false
11747	1	1011101010 (1) 1010101010	false
11748	1	1011101010 (1) 1011001010	false
11749	1	1011101010 (1) 1011111010	false
11750	1	1011101010 (1) 1011100010	false
11751	1	1011101010 (1) 1011101000	false
11752	1	1001111010 (1) 1011111010	false
11753	1	1001111010 (1) 1001011010	false
11754	1	1001111010 (1) 1001110010	false
11755	1	1001111010 (1) 1001111110	false
11756	1	1001111010 (1) 1001111000	false
11757	1	0011101010 (1) 0010101010	false
11758	1	0011101010 (1) 0011001010	false
11759	1	0011101010 (1) 0011111010	false
11760	1	0011101010 (1) 0011100010	false
11761	1	0011101010 (1) 0011101000	false
11762	1	0001111010 (1) 0011111010	false
11763	1	0001111010 (1) 0001011010	false
11764	1	0001111010 (1) 0001110010	false
11765	1	0001111010 (1) 0001111110	false
11766	1	0001111010 (1) 0001111000	false
11767	1	0111011110 (1) 0011011110	false
11768	1	0111011110 (1) 0110011110	false
11769	1	0111011110 (1) 0111111110	false
11770	1	0111011110 (1) 0111001110	false
11771	1	0111011110 (1) 0111010110	false
11772	1	1111011110 (1) 1011011110	false
11773	1	1111011110 (1) 1110011110	false
11774	1	1111011110 (1) 1111111110	false
11775	1	1111011110 (1) 1111001110	false
11776	1	1111011110 (1) 1111010110	false
11777	1	0100111001 (1) 0000111001	false
11778	1	0100111001 (1) 0101111001	false
11779	1	0100111001 (1) 0100011001	false
11780	1	0100111001 (1) 0100111101	false
11781	1	0100110101 (1) 0000110101	false
11782	1	0100110101 (1) 0110110101	false
11783	1	0100110101 (1) 0101110101	false
11784	1	0100110101 (1) 0100111101	false
11785	1	1100111001 (1) 1000111001	false
11786	1	1100111001 (1) 1101111001	false
11787	1	1100111001 (1) 1100011001	false
11788	1	1100111001 (1) 1100111101	false
11789	1	1100110101 (1) 1000110101	false
11790	1	1100110101 (1) 1110110101	false
11791	1	1100110101 (1) 1101110101	false
11792	1	1100110101 (1) 1100111101	false
11793	1	0101100110 (1) 0001100110	false
11794	1	0101100110 (1) 0111100110	false
11795	1	0101100110 (1) 0101110110	false
11796	1	0101100110 (1) 0101100010	false
11797	1	0101100110 (1) 0101100100	false
11798	1	0011011110 (1) 0010011110	false
11799	1	0011011110 (1) 0011001110	false
11800	1	0011011110 (1) 0011010110	false
11801	1	1101100110 (1) 1111100110	false
11802	1	1101100110 (1) 1101110110	false
11803	1	1101100110 (1) 1101100010	false
11804	1	1101100110 (1) 1101100100	false
11805	1	1011011110 (1) 1010011110	false
11806	1	1011011110 (1) 1011001110	false
11807	1	1011011110 (1) 1011010110	false
11808	1	0000111001 (1) 0010111001	false
11809	1	0000111001 (1) 0001111001	false
11810	1	0000111001 (1) 0000011001	false
11811	1	0000111001 (1) 0000111101	false
11812	1	0000110101 (1) 0010110101	false
11813	1	0000110101 (1) 0001110101	false
11814	1	0000110101 (1) 0000111101	false
11815	1	0110001101 (1) 0010001101	false
11816	1	0110001101 (1) 0110000101	false
11817	1	0110001101 (1) 0110001111	false
11818	1	0110001011 (1) 0010001011	false
11819	1	0110001011 (1) 0100001011	false
11820	1	0110001011 (1) 0110000011	false
11821	1	0110001011 (1) 0110001111	false
11822	1	0110001001 (1) 0010001001	false
11823	1	0110001001 (1) 0100001001	false
11824	1	0110001001 (1) 0110000001	false
11825	1	0110001001 (1) 0110001101	false
11826	1	0110001001 (1) 0110001011	false
11827	1	1000111001 (1) 1010111001	false
11828	1	1000111001 (1) 1001111001	false
11829	1	1000111001 (1) 1000011001	false
11830	1	1000111001 (1) 1000111101	false
11831	1	1000110101 (1) 1010110101	false
11832	1	1000110101 (1) 1001110101	false
11833	1	1000110101 (1) 1000111101	false
11834	1	1110001101 (1) 1110000101	false
11835	1	1110001101 (1) 1110001111	false
11836	1	1110001011 (1) 1100001011	false
11837	1	1110001011 (1) 1110000011	false
11838	1	1110001011 (1) 1110001111	false
11839	1	0001100110 (1) 0011100110	false
11840	1	0001100110 (1) 0001110110	false
11841	1	0001100110 (1) 0001100010	false
11842	1	0001100110 (1) 0001100100	false
11843	1	1001100110 (1) 1101100110	false
11844	1	1001100110 (1) 1011100110	false
11845	1	1001100110 (1) 1001110110	false
11846	1	1001100110 (1) 1001100010	false
11847	1	1001100110 (1) 1001100100	false
11848	1	0010001101 (1) 0010000101	false
11849	1	0010001101 (1) 0010001111	false
11850	1	0010001011 (1) 0000001011	false
11851	1	0010001011 (1) 0010000011	false
11852	1	0010001011 (1) 0010001111	false
11853	1	0010001001 (1) 0000001001	false
11854	1	0010001001 (1) 0010000001	false
11855	1	0010001001 (1) 0010001101	false
11856	1	0010001001 (1) 0010001011	false
11857	1	1110001001 (1) 1100001001	false
11858	1	1110001001 (1) 1110000001	false
11859	1	1110001001 (1) 1110001101	false
11860	1	1110001001 (1) 1110001011	false
11861	1	1010001101 (1) 1110001101	false
11862	1	1010001101 (1) 1010000101	false
11863	1	1010001101 (1) 1010001111	false
11864	1	1010001011 (1) 1110001011	false
11865	1	1010001011 (1) 1000001011	false
11866	1	1010001011 (1) 1010000011	false
11867	1	1010001011 (1) 1010001111	false
11868	1	1010001001 (1) 1110001001	false
11869	1	1010001001 (1) 1000001001	false
11870	1	1010001001 (1) 1010000001	false
11871	1	1010001001 (1) 1010001101	false
11872	1	1010001001 (1) 1010001011	false
11873	1	0110111010 (1) 0010111010	false
11874	1	0110111010 (1) 0100111010	false
11875	1	0110111010 (1) 0110011010	false
11876	1	0110111010 (1) 0110110010	false
11877	1	0110111010 (1) 0110111110	false
11878	1	0110111010 (1) 0110111000	false
11879	1	0110101010 (1) 0010101010	false
11880	1	0110101010 (1) 0100101010	false
11881	1	0110101010 (1) 0110001010	false
11882	1	0110101010 (1) 0110111010	false
11883	1	0110101010 (1) 0110100010	false
11884	1	0110101010 (1) 0110101000	false
11885	1	1110111010 (1) 1010111010	false
11886	1	1110111010 (1) 1100111010	false
11887	1	1110111010 (1) 1110011010	false
11888	1	1110111010 (1) 1110110010	false
11889	1	1110111010 (1) 1110111110	false
11890	1	1110111010 (1) 1110111000	false
11891	1	1111011001 (1) 1011011001	false
11892	1	1111011001 (1) 1101011001	false
11893	1	1111011001 (1) 1110011001	false
11894	1	1111011001 (1) 1111111001	false
11895	1	1111011001 (1) 1111001001	false
11896	1	1111011001 (1) 1111011101	false
11897	1	1111011001 (1) 1111011011	false
11898	1	1111010101 (1) 1011010101	false
11899	1	1111010101 (1) 1110010101	false
11900	1	1111010101 (1) 1111110101	false
11901	1	1111010101 (1) 1111000101	false
11902	1	1111010101 (1) 1111011101	false
11903	1	1111010101 (1) 1111010111	false
11904	1	1111010011 (1) 1011010011	false
11905	1	1111010011 (1) 1101010011	false
11906	1	1111010011 (1) 1110010011	false
11907	1	1111010011 (1) 1111110011	false
11908	1	1111010011 (1) 1111000011	false
11909	1	1111010011 (1) 1111010111	false
11910	1	1111010001 (1) 1011010001	false
11911	1	1111010001 (1) 1101010001	false
11912	1	1111010001 (1) 1110010001	false
11913	1	1111010001 (1) 1111110001	false
11914	1	1111010001 (1) 1111000001	false
11915	1	1111010001 (1) 1111011001	false
11916	1	1111010001 (1) 1111010101	false
11917	1	1111010001 (1) 1111010011	false
11918	1	0111011001 (1) 0011011001	false
11919	1	0111011001 (1) 0101011001	false
11920	1	0111011001 (1) 0110011001	false
11921	1	0111011001 (1) 0111111001	false
11922	1	0111011001 (1) 0111001001	false
11923	1	0111011001 (1) 0111011101	false
11924	1	0111011001 (1) 0111011011	false
11925	1	0111010101 (1) 0011010101	false
11926	1	0111010101 (1) 0110010101	false
11927	1	0111010101 (1) 0111110101	false
11928	1	0111010101 (1) 0111000101	false
11929	1	0111010101 (1) 0111011101	false
11930	1	0111010101 (1) 0111010111	false
11931	1	0111010011 (1) 0011010011	false
11932	1	0111010011 (1) 0101010011	false
11933	1	0111010011 (1) 0110010011	false
11934	1	0111010011 (1) 0111110011	false
11935	1	0111010011 (1) 0111000011	false
11936	1	0111010011 (1) 0111010111	false
11937	1	0111010001 (1) 0011010001	false
11938	1	0111010001 (1) 0101010001	false
11939	1	0111010001 (1) 0110010001	false
11940	1	0111010001 (1) 0111110001	false
11941	1	0111010001 (1) 0111000001	false
11942	1	0111010001 (1) 0111011001	false
11943	1	0111010001 (1) 0111010101	false
11944	1	0111010001 (1) 0111010011	false
11945	1	1110101010 (1) 1100101010	false
11946	1	1110101010 (1) 1110001010	false
11947	1	1110101010 (1) 1110111010	false
11948	1	1110101010 (1) 1110100010	false
11949	1	1110101010 (1) 1110101000	false
11950	1	1010111010 (1) 1010011010	false
11951	1	1010111010 (1) 1010110010	false
11952	1	1010111010 (1) 1010111110	false
11953	1	1010111010 (1) 1010111000	false
11954	1	0101011110 (1) 0001011110	false
11955	1	0101011110 (1) 0111011110	false
11956	1	0101011110 (1) 0101111110	false
11957	1	0101011110 (1) 0101001110	false
11958	1	0101011110 (1) 0101010110	false
11959	1	0010111010 (1) 0010011010	false
11960	1	0010111010 (1) 0010110010	false
11961	1	0010111010 (1) 0010111110	false
11962	1	0010111010 (1) 0010111000	false
11963	1	1101011110 (1) 1001011110	false
11964	1	1101011110 (1) 1111011110	false
11965	1	1101011110 (1) 1101111110	false
11966	1	1101011110 (1) 1101001110	false
11967	1	1101011110 (1) 1101010110	false
11968	1	0011011001 (1) 0001011001	false
11969	1	0011011001 (1) 0010011001	false
11970	1	0011011001 (1) 0011001001	false
11971	1	0011011001 (1) 0011011101	false
11972	1	0011011001 (1) 0011011011	false
11973	1	0011010101 (1) 0010010101	false
11974	1	0011010101 (1) 0011110101	false
11975	1	0011010101 (1) 0011000101	false
11976	1	0011010101 (1) 0011011101	false
11977	1	0011010101 (1) 0011010111	false
11978	1	0011010011 (1) 0001010011	false
11979	1	0011010011 (1) 0010010011	false
11980	1	0011010011 (1) 0011000011	false
11981	1	0011010011 (1) 0011010111	false
11982	1	0011010001 (1) 0001010001	false
11983	1	0011010001 (1) 0010010001	false
11984	1	0011010001 (1) 0011000001	false
11985	1	0011010001 (1) 0011011001	false
11986	1	0011010001 (1) 0011010101	false
11987	1	0011010001 (1) 0011010011	false
11988	1	1011011001 (1) 1001011001	false
11989	1	1011011001 (1) 1010011001	false
11990	1	1011011001 (1) 1011001001	false
11991	1	1011011001 (1) 1011011101	false
11992	1	1011011001 (1) 1011011011	false
11993	1	1011010101 (1) 1010010101	false
11994	1	1011010101 (1) 1011110101	false
11995	1	1011010101 (1) 1011000101	false
11996	1	1011010101 (1) 1011011101	false
11997	1	1011010101 (1) 1011010111	false
11998	1	1011010011 (1) 1001010011	false
11999	1	1011010011 (1) 1010010011	false
12000	1	1011010011 (1) 1011000011	false
12001	1	1011010011 (1) 1011010111	false
12002	1	1011010001 (1) 1001010001	false
12003	1	1011010001 (1) 1010010001	false
12004	1	1011010001 (1) 1011000001	false
12005	1	1011010001 (1) 1011011001	false
12006	1	1011010001 (1) 1011010101	false
12007	1	1011010001 (1) 1011010011	false
12008	1	0001011110 (1) 0011011110	false
12009	1	0001011110 (1) 0001001110	false
12010	1	0001011110 (1) 0001010110	false
12011	1	1001011110 (1) 1011011110	false
12012	1	1001011110 (1) 1001001110	false
12013	1	1001011110 (1) 1001010110	false
12014	1	0101001001 (1) 0001001001	false
12015	1	0101001001 (1) 0101101001	false
12016	1	0101001001 (1) 0101000001	false
12017	1	0101001001 (1) 0101001101	false
12018	1	0101001001 (1) 0101001011	false
12019	1	0100001101 (1) 0000001101	false
12020	1	0100001101 (1) 0110001101	false
12021	1	0100001101 (1) 0101001101	false
12022	1	0100001101 (1) 0100000101	false
12023	1	0100001101 (1) 0100001111	false
12024	1	0100001011 (1) 0000001011	false
12025	1	0100001011 (1) 0101001011	false
12026	1	0100001011 (1) 0100000011	false
12027	1	0100001011 (1) 0100001111	false
12028	1	0100001001 (1) 0000001001	false
12029	1	0100001001 (1) 0101001001	false
12030	1	0100001001 (1) 0100000001	false
12031	1	0100001001 (1) 0100001101	false
12032	1	0100001001 (1) 0100001011	false
12033	1	1101001001 (1) 1101101001	false
12034	1	1101001001 (1) 1101000001	false
12035	1	1101001001 (1) 1101001101	false
12036	1	1101001001 (1) 1101001011	false
12037	1	1100001101 (1) 1110001101	false
12038	1	1100001101 (1) 1101001101	false
12039	1	1100001101 (1) 1100000101	false
12040	1	1100001101 (1) 1100001111	false
12041	1	1100001011 (1) 1101001011	false
12042	1	1100001011 (1) 1100000011	false
12043	1	1100001011 (1) 1100001111	false
12044	1	0110100110 (1) 0010100110	false
12045	1	0110100110 (1) 0110110110	false
12046	1	0110100110 (1) 0110100010	false
12047	1	0110100110 (1) 0110100100	false
12048	1	1110100110 (1) 1110110110	false
12049	1	1110100110 (1) 1110100010	false
12050	1	1110100110 (1) 1110100100	false
12051	1	0001001001 (1) 0001000001	false
12052	1	0001001001 (1) 0001001101	false
12053	1	0001001001 (1) 0001001011	false
12054	1	0000001101 (1) 0010001101	false
12055	1	0000001101 (1) 0001001101	false
12056	1	0000001101 (1) 0000000101	false
12057	1	0000001101 (1) 0000001111	false
12058	1	0000001011 (1) 0001001011	false
12059	1	0000001011 (1) 0000000011	false
12060	1	0000001011 (1) 0000001111	false
12061	1	0000001001 (1) 0001001001	false
12062	1	0000001001 (1) 0000000001	false
12063	1	0000001001 (1) 0000001101	false
12064	1	0000001001 (1) 0000001011	false
12065	1	1100001001 (1) 1101001001	false
12066	1	1100001001 (1) 1100000001	false
12067	1	1100001001 (1) 1100001101	false
12068	1	1100001001 (1) 1100001011	false
12069	1	1001001001 (1) 1101001001	false
12070	1	1001001001 (1) 1001000001	false
12071	1	1001001001 (1) 1001001101	false
12072	1	1001001001 (1) 1001001011	false
12073	1	1000001101 (1) 1100001101	false
12074	1	1000001101 (1) 1010001101	false
12075	1	1000001101 (1) 1001001101	false
12076	1	1000001101 (1) 1000000101	false
12077	1	1000001101 (1) 1000001111	false
12078	1	1000001011 (1) 1100001011	false
12079	1	1000001011 (1) 1001001011	false
12080	1	1000001011 (1) 1000000011	false
12081	1	1000001011 (1) 1000001111	false
12082	1	1000001001 (1) 1100001001	false
12083	1	1000001001 (1) 1001001001	false
12084	1	1000001001 (1) 1000000001	false
12085	1	1000001001 (1) 1000001101	false
12086	1	1000001001 (1) 1000001011	false
12087	1	0100111010 (1) 0000111010	false
12088	1	0100111010 (1) 0101111010	false
12089	1	0100111010 (1) 0100011010	false
12090	1	0100111010 (1) 0100110010	false
12091	1	0100111010 (1) 0100111110	false
12092	1	0100111010 (1) 0100111000	false
12093	1	0100101010 (1) 0000101010	false
12094	1	0100101010 (1) 0101101010	false
12095	1	0100101010 (1) 0100001010	false
12096	1	0100101010 (1) 0100111010	false
12097	1	0100101010 (1) 0100100010	false
12098	1	0100101010 (1) 0100101000	false
12099	1	0010100110 (1) 0010110110	false
12100	1	0010100110 (1) 0010100010	false
12101	1	0010100110 (1) 0010100100	false
12102	1	1100111010 (1) 1000111010	false
12103	1	1100111010 (1) 1101111010	false
12104	1	1100111010 (1) 1100011010	false
12105	1	1100111010 (1) 1100110010	false
12106	1	1100111010 (1) 1100111110	false
12107	1	1100111010 (1) 1100111000	false
12108	1	1010100110 (1) 1110100110	false
12109	1	1010100110 (1) 1010110110	false
12110	1	1010100110 (1) 1010100010	false
12111	1	1010100110 (1) 1010100100	false
12112	1	0101011001 (1) 0001011001	false
12113	1	0101011001 (1) 0101111001	false
12114	1	0101011001 (1) 0101001001	false
12115	1	0101011001 (1) 0101011101	false
12116	1	0101011001 (1) 0101011011	false
12117	1	0101010101 (1) 0001010101	false
12118	1	0101010101 (1) 0111010101	false
12119	1	0101010101 (1) 0101110101	false
12120	1	0101010101 (1) 0101000101	false
12121	1	0101010101 (1) 0101011101	false
12122	1	0101010101 (1) 0101010111	false
12123	1	0101010011 (1) 0001010011	false
12124	1	0101010011 (1) 0101110011	false
12125	1	0101010011 (1) 0101000011	false
12126	1	0101010011 (1) 0101010111	false
12127	1	1101011001 (1) 1001011001	false
12128	1	1101011001 (1) 1101111001	false
12129	1	1101011001 (1) 1101001001	false
12130	1	1101011001 (1) 1101011101	false
12131	1	1101011001 (1) 1101011011	false
12132	1	1101010101 (1) 1001010101	false
12133	1	1101010101 (1) 1111010101	false
12134	1	1101010101 (1) 1101110101	false
12135	1	1101010101 (1) 1101000101	false
12136	1	1101010101 (1) 1101011101	false
12137	1	1101010101 (1) 1101010111	false
12138	1	1101010011 (1) 1001010011	false
12139	1	1101010011 (1) 1101110011	false
12140	1	1101010011 (1) 1101000011	false
12141	1	1101010011 (1) 1101010111	false
12142	1	1100101010 (1) 1101101010	false
12143	1	1100101010 (1) 1100001010	false
12144	1	1100101010 (1) 1100111010	false
12145	1	1100101010 (1) 1100100010	false
12146	1	1100101010 (1) 1100101000	false
12147	1	1010101010 (1) 1110101010	false
12148	1	1010101010 (1) 1010001010	false
12149	1	1010101010 (1) 1010111010	false
12150	1	1010101010 (1) 1010100010	false
12151	1	1010101010 (1) 1010101000	false
12152	1	1001101010 (1) 1101101010	false
12153	1	1001101010 (1) 1011101010	false
12154	1	1001101010 (1) 1001001010	false
12155	1	1001101010 (1) 1001111010	false
12156	1	1001101010 (1) 1001100010	false
12157	1	1001101010 (1) 1001101000	false
12158	1	1000111010 (1) 1010111010	false
12159	1	1000111010 (1) 1001111010	false
12160	1	1000111010 (1) 1000011010	false
12161	1	1000111010 (1) 1000110010	false
12162	1	1000111010 (1) 1000111110	false
12163	1	1000111010 (1) 1000111000	false
12164	1	1000101010 (1) 1100101010	false
12165	1	1000101010 (1) 1010101010	false
12166	1	1000101010 (1) 1001101010	false
12167	1	1000101010 (1) 1000001010	false
12168	1	1000101010 (1) 1000111010	false
12169	1	1000101010 (1) 1000100010	false
12170	1	1000101010 (1) 1000101000	false
12171	1	0010101010 (1) 0010001010	false
12172	1	0010101010 (1) 0010111010	false
12173	1	0010101010 (1) 0010100010	false
12174	1	0010101010 (1) 0010101000	false
12175	1	0001101010 (1) 0011101010	false
12176	1	0001101010 (1) 0001001010	false
12177	1	0001101010 (1) 0001111010	false
12178	1	0001101010 (1) 0001100010	false
12179	1	0001101010 (1) 0001101000	false
12180	1	0000111010 (1) 0010111010	false
12181	1	0000111010 (1) 0001111010	false
12182	1	0000111010 (1) 0000011010	false
12183	1	0000111010 (1) 0000110010	false
12184	1	0000111010 (1) 0000111110	false
12185	1	0000111010 (1) 0000111000	false
12186	1	0000101010 (1) 0010101010	false
12187	1	0000101010 (1) 0001101010	false
12188	1	0000101010 (1) 0000001010	false
12189	1	0000101010 (1) 0000111010	false
12190	1	0000101010 (1) 0000100010	false
12191	1	0000101010 (1) 0000101000	false
12192	1	0001011001 (1) 0001001001	false
12193	1	0001011001 (1) 0001011101	false
12194	1	0001011001 (1) 0001011011	false
12195	1	0001010101 (1) 0011010101	false
12196	1	0001010101 (1) 0001110101	false
12197	1	0001010101 (1) 0001000101	false
12198	1	0001010101 (1) 0001011101	false
12199	1	0001010101 (1) 0001010111	false
12200	1	0001010011 (1) 0001000011	false
12201	1	0001010011 (1) 0001010111	false
12202	1	1001011001 (1) 1001001001	false
12203	1	1001011001 (1) 1001011101	false
12204	1	1001011001 (1) 1001011011	false
12205	1	1001010101 (1) 1011010101	false
12206	1	1001010101 (1) 1001110101	false
12207	1	1001010101 (1) 1001000101	false
12208	1	1001010101 (1) 1001011101	false
12209	1	1001010101 (1) 1001010111	false
12210	1	1001010011 (1) 1001000011	false
12211	1	1001010011 (1) 1001010111	false
[truncated: 2,100 more rows]
