# Supplementary material
Source: publisher figshare collection journal article supplement (https://springernature.figshare.com/ndownloader/files/17562821)
Supplement: Supplementary file 1 [file 17562821 › CytoscapeSession-2018_09_25-21_15/tables/9182-STG%2C+Model+4/LOCAL_ATTRS-org.cytoscape.model.CyNode-STG%2C+Model+4+default++node.cytable]

CyCSV-Version	1
SUID	name	selected
java.lang.Long	java.lang.String	java.lang.Boolean
STG, Model 4 default node
9192	0111111111	false
9193	1111111111	false
9194	0011111111	false
9195	1011111111	false
9196	0101111111	false
9197	1101111111	false
9198	0001111111	false
9199	1001111111	false
9200	0110111111	false
9201	1110111111	false
9202	0010111111	false
9203	1010111111	false
9204	0100111111	false
9205	1100111111	false
9206	0000111111	false
9207	1000111111	false
9208	0111111011	false
9209	0111101111	false
9210	1111111011	false
9211	1111101111	false
9212	1011111011	false
9213	1011101111	false
9214	0011111011	false
9215	0011101111	false
9216	0101111011	false
9217	0101101111	false
9218	1101111011	false
9219	1101101111	false
9220	1011101011	false
9221	1001111011	false
9222	1001101111	false
9223	0011101011	false
9224	0001111011	false
9225	0001101111	false
9226	0111011111	false
9227	1111011111	false
9228	1011011111	false
9229	0011011111	false
9230	0110111011	false
9231	0110101111	false
9232	0110101011	false
9233	1110111011	false
9234	1110101111	false
9235	1110101011	false
9236	1010111011	false
9237	1010101111	false
9238	0010111011	false
9239	0010101111	false
9240	0101011111	false
9241	1101011111	false
9242	0111110111	false
9243	1111110111	false
9244	1001011111	false
9245	0001011111	false
9246	0011110111	false
9247	1011110111	false
9248	0100111011	false
9249	0100101111	false
9250	0100101011	false
9251	1100111011	false
9252	1100101111	false
9253	1100101011	false
9254	1010101011	false
9255	1001101011	false
9256	1000111011	false
9257	1000101111	false
9258	1000101011	false
9259	0010101011	false
9260	0001101011	false
9261	0000111011	false
9262	0000101111	false
9263	0000101011	false
9264	0101110111	false
9265	0110011111	false
9266	1101110111	false
9267	1110011111	false
9268	0001110111	false
9269	1111101011	false
9270	1001110111	false
9271	1010011111	false
9272	0111101011	false
9273	0010011111	false
9274	0100011111	false
9275	1100011111	false
9276	0101101011	false
9277	1110110111	false
9278	0110110111	false
9279	1101101011	false
9280	1000011111	false
9281	0000011111	false
9282	0010110111	false
9283	1010110111	false
9284	0100110111	false
9285	1100110111	false
9286	0000110111	false
9287	1000110111	false
9288	0111001111	false
9289	1111001111	false
9290	1011001111	false
9291	0011001111	false
9292	0101001111	false
9293	1101001111	false
9294	1111110011	false
9295	1111100111	false
9296	1001001111	false
9297	0001001111	false
9298	0111110011	false
9299	0111100111	false
9300	1011110011	false
9301	1011100111	false
9302	0011110011	false
9303	0011100111	false
9304	1011101110	false
9305	0011101110	false
9306	0111111101	false
9307	1111111101	false
9308	0101110011	false
9309	0101100111	false
9310	0110001111	false
9311	1011111101	false
9312	0011111101	false
9313	1110001111	false
9314	1101110011	false
9315	1101100111	false
9316	1011100011	false
9317	1001110011	false
9318	1001100111	false
9319	0011100011	false
9320	0001110011	false
9321	0001100111	false
9322	1010001111	false
9323	0010001111	false
9324	0111010111	false
9325	1111010111	false
9326	0011010111	false
9327	0101111101	false
9328	1011010111	false
9329	1101111101	false
9330	0001111101	false
9331	0100001111	false
9332	1001111101	false
9333	1100001111	false
9334	0110110011	false
9335	0110100111	false
9336	0110100011	false
9337	1110110011	false
9338	1110100111	false
9339	1000001111	false
9340	0000001111	false
9341	0110101110	false
9342	0100101110	false
9343	1110101110	false
9344	1110100011	false
9345	1010110011	false
9346	1010100111	false
9347	0101010111	false
9348	0010110011	false
9349	0010100111	false
9350	1101010111	false
9351	1100101110	false
9352	1010101110	false
9353	1001101110	false
9354	1000101110	false
9355	0010101110	false
9356	0001101110	false
9357	0000101110	false
9358	0001010111	false
9359	1001010111	false
9360	0110111101	false
9361	1110111101	false
9362	0111101110	false
9363	1111101110	false
9364	0100110011	false
9365	0100100111	false
9366	0100100011	false
9367	0010111101	false
9368	1100110011	false
9369	1100100111	false
9370	1010111101	false
9371	1100100011	false
9372	1010100011	false
9373	1001100011	false
9374	1000110011	false
9375	1000100111	false
9376	1000100011	false
9377	0010100011	false
9378	0001100011	false
9379	0000110011	false
9380	0000100111	false
9381	0000100011	false
9382	0110010111	false
9383	1110010111	false
9384	0100111101	false
9385	1010010111	false
9386	1111100011	false
9387	0101101110	false
9388	0111100011	false
9389	1100111101	false
9390	1101101110	false
9391	0010010111	false
9392	0000111101	false
9393	1000111101	false
9394	1111011101	false
9395	1111011011	false
9396	0111011101	false
9397	0111011011	false
9398	0100010111	false
9399	1100010111	false
9400	0101100011	false
9401	0000010111	false
9402	1101100011	false
9403	0111111110	false
9404	0011011101	false
9405	0011011011	false
9406	1000010111	false
9407	1111111110	false
9408	1011011101	false
9409	1011011011	false
9410	0011111110	false
9411	1011111110	false
9412	0101011101	false
9413	0101011011	false
9414	1101011101	false
9415	1101011011	false
9416	0001011101	false
9417	0001011011	false
9418	1001011101	false
9419	1001011011	false
9420	0101111110	false
9421	1101111110	false
9422	0001111110	false
9423	1001111110	false
9424	0111101101	false
9425	0110011101	false
9426	0110011011	false
9427	1111101101	false
9428	1110011101	false
9429	1110011011	false
9430	0010011101	false
9431	0010011011	false
9432	0011101101	false
9433	1011101101	false
9434	1010011101	false
9435	1010011011	false
9436	0110111110	false
9437	1110111110	false
9438	0010111110	false
9439	1010111110	false
9440	0111000111	false
9441	1111000111	false
9442	0101101101	false
9443	1100011101	false
9444	1100011011	false
9445	1101101101	false
9446	1011000111	false
9447	0011000111	false
9448	0100011101	false
9449	0100011011	false
9450	0111110110	false
9451	1111110110	false
9452	1011101001	false
9453	1001101101	false
9454	0011101001	false
9455	0001101101	false
9456	0000011101	false
9457	0000011011	false
9458	1000011101	false
9459	1000011011	false
9460	0100111110	false
9461	0011110110	false
9462	1100111110	false
9463	1011110110	false
9464	0000111110	false
9465	1000111110	false
9466	0101000111	false
9467	1101000111	false
9468	0001000111	false
9469	1001000111	false
9470	0101110110	false
9471	1101110110	false
9472	0110101101	false
9473	0110101001	false
9474	1110101101	false
9475	0001110110	false
9476	1001110110	false
9477	1110101001	false
9478	1010101101	false
9479	0010101101	false
9480	0111111001	false
9481	0111110101	false
9482	1111111001	false
9483	1111110101	false
9484	0011111001	false
9485	0011110101	false
9486	0110000111	false
9487	1011111001	false
9488	1011110101	false
9489	1110000111	false
9490	0100101101	false
9491	0100101001	false
9492	1100101101	false
9493	1010000111	false
9494	0010000111	false
9495	0110110110	false
9496	1110110110	false
9497	1100101001	false
9498	1010101001	false
9499	1001101001	false
9500	1000101101	false
9501	1000101001	false
9502	0010101001	false
9503	0001101001	false
9504	0000101101	false
9505	0000101001	false
9506	0010110110	false
9507	1010110110	false
9508	0101111001	false
9509	0101110101	false
9510	1101111001	false
9511	1101110101	false
9512	0111101001	false
9513	0111001101	false
9514	0111001011	false
9515	0111001001	false
9516	0001111001	false
9517	0001110101	false
9518	0100000111	false
9519	1111101001	false
9520	1111001101	false
9521	1111001011	false
9522	1001111001	false
9523	1001110101	false
9524	1100000111	false
9525	0111111010	false
9526	1111001001	false
9527	1011001101	false
9528	1011001011	false
9529	1011001001	false
9530	0000000111	false
9531	0100110110	false
9532	0011001101	false
9533	0011001011	false
9534	0011001001	false
9535	1000000111	false
9536	1111111010	false
9537	1100110110	false
9538	1011111010	false
9539	0011111010	false
9540	0000110110	false
9541	1000110110	false
9542	0110111001	false
9543	0110110101	false
9544	0101101001	false
9545	0101001101	false
9546	0101001011	false
9547	1110111001	false
9548	1110110101	false
9549	1101101001	false
9550	1101001101	false
9551	1101001011	false
9552	0111100110	false
9553	1111100110	false
9554	0101111010	false
9555	0011100110	false
9556	1010111001	false
9557	1010110101	false
9558	0001001101	false
9559	0001001011	false
9560	1011100110	false
9561	1001001101	false
9562	1001001011	false
9563	0010111001	false
9564	0010110101	false
9565	1101111010	false
9566	1011101010	false
9567	1001111010	false
9568	0011101010	false
9569	0001111010	false
9570	0111011110	false
9571	1111011110	false
9572	0100111001	false
9573	0100110101	false
9574	1100111001	false
9575	1100110101	false
9576	0101100110	false
9577	0011011110	false
9578	1101100110	false
9579	1011011110	false
9580	0000111001	false
9581	0000110101	false
9582	0110001101	false
9583	0110001011	false
9584	0110001001	false
9585	1000111001	false
9586	1000110101	false
9587	1110001101	false
9588	1110001011	false
9589	0001100110	false
9590	1001100110	false
9591	0010001101	false
9592	0010001011	false
9593	0010001001	false
9594	1110001001	false
9595	1010001101	false
9596	1010001011	false
9597	1010001001	false
9598	0110111010	false
9599	0110101010	false
9600	1110111010	false
9601	1111011001	false
9602	1111010101	false
9603	1111010011	false
9604	1111010001	false
9605	0111011001	false
9606	0111010101	false
9607	0111010011	false
9608	0111010001	false
9609	1110101010	false
9610	1010111010	false
9611	0101011110	false
9612	0010111010	false
9613	1101011110	false
9614	0011011001	false
9615	0011010101	false
9616	0011010011	false
9617	0011010001	false
9618	1011011001	false
9619	1011010101	false
9620	1011010011	false
9621	1011010001	false
9622	0001011110	false
9623	1001011110	false
9624	0101001001	false
9625	0100001101	false
9626	0100001011	false
9627	0100001001	false
9628	1101001001	false
9629	1100001101	false
9630	1100001011	false
9631	0110100110	false
9632	1110100110	false
9633	0001001001	false
9634	0000001101	false
9635	0000001011	false
9636	0000001001	false
9637	1100001001	false
9638	1001001001	false
9639	1000001101	false
9640	1000001011	false
9641	1000001001	false
9642	0100111010	false
9643	0100101010	false
9644	0010100110	false
9645	1100111010	false
9646	1010100110	false
9647	0101011001	false
9648	0101010101	false
9649	0101010011	false
9650	1101011001	false
9651	1101010101	false
9652	1101010011	false
9653	1100101010	false
9654	1010101010	false
9655	1001101010	false
9656	1000111010	false
9657	1000101010	false
9658	0010101010	false
9659	0001101010	false
9660	0000111010	false
9661	0000101010	false
9662	0001011001	false
9663	0001010101	false
9664	0001010011	false
9665	1001011001	false
9666	1001010101	false
9667	1001010011	false
9668	0110011110	false
9669	1110011110	false
9670	0100100110	false
9671	0111101010	false
9672	0010011110	false
9673	1111101010	false
9674	1100100110	false
9675	1010011110	false
9676	0000100110	false
9677	1000100110	false
9678	0110011001	false
9679	0110010101	false
9680	0110010011	false
9681	0110010001	false
9682	0111110001	false
9683	0111100101	false
9684	1110011001	false
9685	1110010101	false
9686	1110010011	false
9687	1110010001	false
9688	1111110001	false
9689	1111100101	false
9690	0100011110	false
9691	1100011110	false
9692	0011101100	false
9693	1010011001	false
9694	1010010101	false
9695	1010010011	false
9696	1010010001	false
9697	1011110001	false
9698	1011100101	false
9699	0010011001	false
9700	0010010101	false
9701	0010010011	false
9702	0010010001	false
9703	0101101010	false
9704	0011110001	false
9705	0011100101	false
9706	1011101100	false
9707	1000011110	false
9708	1101101010	false
9709	0000011110	false
9710	0101010001	false
9711	0100011001	false
9712	0100010101	false
9713	0100010011	false
9714	0100010001	false
9715	0101110001	false
9716	0101100101	false
9717	1101010001	false
9718	1100011001	false
9719	1100010101	false
9720	1100010011	false
9721	1100010001	false
9722	1101110001	false
9723	1101100101	false
9724	1011100001	false
9725	1001110001	false
9726	1001100101	false
9727	0011100001	false
9728	0001110001	false
9729	0001100101	false
9730	0001010001	false
9731	0000011001	false
9732	0000010101	false
9733	0000010011	false
9734	0000010001	false
9735	1001010001	false
9736	1000011001	false
9737	1000010101	false
9738	1000010011	false
9739	1000010001	false
9740	0110110001	false
9741	0110100101	false
9742	0110100001	false
9743	1110110001	false
9744	1110100101	false
9745	0110101100	false
9746	0100101100	false
9747	1110101100	false
9748	1110100001	false
9749	1010110001	false
9750	1010100101	false
9751	0010110001	false
9752	0010100101	false
9753	1100101100	false
9754	1010101100	false
9755	1001101100	false
9756	1000101100	false
9757	0010101100	false
9758	0001101100	false
9759	0000101100	false
9760	0111101100	false
9761	0111001110	false
9762	1111101100	false
9763	1111001110	false
9764	0100110001	false
9765	0100100101	false
9766	0100100001	false
9767	1100110001	false
9768	1100100101	false
9769	0011001110	false
9770	1011001110	false
9771	1100100001	false
9772	1010100001	false
9773	1001100001	false
9774	1000110001	false
9775	1000100101	false
9776	1000100001	false
9777	0010100001	false
9778	0001100001	false
9779	0000110001	false
9780	0000100101	false
9781	0000100001	false
9782	0111100001	false
9783	0111000101	false
9784	0111000011	false
9785	0111000001	false
9786	1111100001	false
9787	1111000101	false
9788	1111000011	false
9789	0111001100	false
9790	0101101100	false
9791	0101001110	false
9792	1111001100	false
9793	1101101100	false
9794	1101001110	false
9795	1111000001	false
9796	1011000101	false
9797	1011000011	false
9798	1011000001	false
9799	0111110010	false
9800	0011001100	false
9801	0001001110	false
9802	0011000101	false
9803	0011000011	false
9804	0011000001	false
9805	1011001100	false
9806	1001001110	false
9807	1111110010	false
9808	0011110010	false
9809	1011110010	false
9810	0101100001	false
9811	0101000101	false
9812	0101000011	false
9813	1101100001	false
9814	1101000101	false
9815	1101000011	false
9816	0111111100	false
9817	1111111100	false
9818	0101110010	false
9819	1001000101	false
9820	1001000011	false
9821	0011111100	false
9822	1110001110	false
9823	1011111100	false
9824	0001000101	false
9825	0001000011	false
9826	0110001110	false
9827	1101110010	false
9828	0011100010	false
9829	0001110010	false
9830	0010001110	false
9831	1011100010	false
9832	1001110010	false
9833	1010001110	false
9834	1111010110	false
9835	0111010110	false
9836	1011010110	false
9837	0011010110	false
9838	0101111100	false
9839	1101111100	false
9840	0110000101	false
9841	0110000011	false
9842	0110000001	false
9843	1110000101	false
9844	1110000011	false
9845	0110001100	false
9846	0101001100	false
9847	0100001110	false
9848	0100001100	false
9849	0001111100	false
9850	1110001100	false
9851	1101001100	false
9852	1100001110	false
9853	1001111100	false
9854	0010000101	false
9855	0010000011	false
9856	0010000001	false
9857	1110000001	false
9858	1010000101	false
9859	1010000011	false
9860	1010000001	false
9861	0110110010	false
9862	0110100010	false
9863	0010001100	false
9864	0001001100	false
9865	0000001110	false
9866	0000001100	false
9867	1100001100	false
9868	1010001100	false
9869	1001001100	false
9870	1000001110	false
9871	1000001100	false
9872	1110110010	false
9873	1111010100	false
9874	1101010110	false
9875	0111010100	false
9876	0101010110	false
9877	0010110010	false
9878	1110100010	false
9879	1010110010	false
9880	1011010100	false
9881	1001010110	false
9882	0011010100	false
9883	0001010110	false
9884	0101000001	false
9885	0100000101	false
9886	0100000011	false
9887	0100000001	false
9888	1101000001	false
9889	1100000101	false
9890	1100000011	false
9891	0110111100	false
9892	1110111100	false
9893	1100000001	false
9894	1001000001	false
9895	1000000101	false
9896	1000000011	false
9897	1000000001	false
9898	0001000001	false
9899	0000000101	false
9900	0000000011	false
9901	0000000001	false
9902	0100110010	false
9903	0100100010	false
9904	0010111100	false
9905	1100110010	false
9906	1010111100	false
9907	0010100010	false
9908	0001100010	false
9909	0000110010	false
9910	0000100010	false
9911	1100100010	false
9912	1010100010	false
9913	1001100010	false
9914	1000110010	false
9915	1000100010	false
9916	1110010110	false
9917	0110010110	false
9918	0111110100	false
9919	1111110100	false
9920	1010010110	false
9921	0010010110	false
9922	0111100010	false
9923	0100111100	false
9924	0011110100	false
9925	1011110100	false
9926	1100111100	false
9927	1111100010	false
9928	0000111100	false
9929	1000111100	false
9930	1110010100	false
9931	1101010100	false
9932	1100010110	false
9933	1100010100	false
9934	0110010100	false
9935	0101010100	false
9936	0100010110	false
9937	0100010100	false
9938	1111011100	false
9939	1111011010	false
9940	0111011100	false
9941	0111011010	false
9942	0101110100	false
9943	1101110100	false
9944	1010010100	false
9945	1001010100	false
9946	1000010110	false
9947	1000010100	false
9948	0010010100	false
9949	0001010100	false
9950	0000010110	false
9951	0000010100	false
9952	0011011100	false
9953	0011011010	false
9954	0001110100	false
9955	0101100010	false
9956	1011011100	false
9957	1011011010	false
9958	1001110100	false
9959	1101100010	false
9960	0101011100	false
9961	0101011010	false
9962	1101011100	false
9963	1101011010	false
9964	0110110100	false
9965	0001011100	false
9966	0001011010	false
9967	1001011100	false
9968	1001011010	false
9969	1110110100	false
9970	0010110100	false
9971	1010110100	false
9972	0100110100	false
9973	0110011100	false
9974	0110011010	false
9975	1100110100	false
9976	1110011100	false
9977	1110011010	false
9978	0000110100	false
9979	0010011100	false
9980	0010011010	false
9981	1010011100	false
9982	1010011010	false
9983	1000110100	false
9984	0111100100	false
9985	0111000110	false
9986	1111100100	false
9987	1111000110	false
9988	0100011100	false
9989	0100011010	false
9990	0011100100	false
9991	0011000110	false
9992	1011100100	false
9993	1011000110	false
9994	1100011100	false
9995	1100011010	false
9996	1011101000	false
9997	0011101000	false
9998	0000011100	false
9999	0000011010	false
10000	1000011100	false
10001	1000011010	false
10002	0111000100	false
10003	0101100100	false
10004	0101000110	false
10005	1111000100	false
10006	1101100100	false
10007	1101000110	false
10008	0011000100	false
10009	0001100100	false
10010	0001000110	false
10011	1011000100	false
10012	1001100100	false
10013	1001000110	false
10014	0110101000	false
10015	1110101000	false
10016	0111111000	false
10017	1111111000	false
10018	0110100100	false
10019	0110000110	false
10020	0011111000	false
10021	1110100100	false
10022	1110000110	false
10023	1011111000	false
10024	0100101000	false
10025	0010100100	false
10026	0010000110	false
10027	1010100100	false
10028	1010000110	false
10029	1100101000	false
10030	1010101000	false
10031	1001101000	false
10032	1000101000	false
10033	0010101000	false
10034	0001101000	false
10035	0000101000	false
10036	0101111000	false
10037	1101111000	false
10038	0111101000	false
10039	0111001010	false
10040	0111001000	false
10041	0110000100	false
10042	0101000100	false
10043	0100100100	false
10044	0100000110	false
10045	0100000100	false
10046	0001111000	false
10047	1111101000	false
10048	1111001010	false
10049	1110000100	false
10050	1101000100	false
10051	1100100100	false
10052	1100000110	false
10053	1001111000	false
10054	0011001010	false
10055	0011001000	false
10056	0010000100	false
10057	0001000100	false
10058	0000100100	false
10059	0000000110	false
10060	0000000100	false
10061	1111001000	false
10062	1011001010	false
10063	1011001000	false
10064	1100000100	false
10065	1010000100	false
10066	1001000100	false
10067	1000100100	false
10068	1000000110	false
10069	1000000100	false
10070	0101101000	false
10071	0101001010	false
10072	0110111000	false
10073	1101101000	false
10074	1101001010	false
10075	1110111000	false
10076	0001001010	false
10077	0010111000	false
10078	1001001010	false
10079	1010111000	false
10080	0100111000	false
10081	1100111000	false
10082	0110001010	false
10083	0110001000	false
10084	0000111000	false
10085	1110001010	false
10086	1000111000	false
10087	0010001010	false
10088	0010001000	false
10089	1110001000	false
10090	1010001010	false
10091	1010001000	false
10092	1111011000	false
10093	1111010010	false
10094	1111010000	false
10095	0111011000	false
10096	0111010010	false
10097	0111010000	false
10098	0011011000	false
10099	0011010010	false
10100	0011010000	false
10101	1011011000	false
10102	1011010010	false
10103	1011010000	false
10104	0101001000	false
10105	0100001010	false
10106	0100001000	false
10107	1101001000	false
10108	1100001010	false
10109	0001001000	false
10110	0000001010	false
10111	0000001000	false
10112	1100001000	false
10113	1001001000	false
10114	1000001010	false
10115	1000001000	false
10116	0101011000	false
10117	0101010010	false
10118	1101011000	false
10119	1101010010	false
10120	0001011000	false
10121	0001010010	false
10122	1001011000	false
10123	1001010010	false
10124	0110011000	false
10125	0110010010	false
10126	0110010000	false
10127	0111110000	false
10128	1110011000	false
10129	1110010010	false
10130	1110010000	false
10131	1111110000	false
10132	0010011000	false
10133	0010010010	false
10134	0010010000	false
10135	0011110000	false
10136	1010011000	false
10137	1010010010	false
10138	1010010000	false
10139	1011110000	false
10140	0101010000	false
10141	0100011000	false
10142	0100010010	false
10143	0100010000	false
10144	0101110000	false
10145	1101010000	false
10146	1100011000	false
10147	1100010010	false
10148	1100010000	false
10149	1101110000	false
10150	0001010000	false
10151	0000011000	false
10152	0000010010	false
10153	0000010000	false
10154	0011100000	false
10155	0001110000	false
10156	1001010000	false
10157	1000011000	false
10158	1000010010	false
10159	1000010000	false
10160	1011100000	false
10161	1001110000	false
10162	0110110000	false
10163	0110100000	false
10164	1110110000	false
10165	0010110000	false
10166	1110100000	false
10167	1010110000	false
10168	0100110000	false
10169	0100100000	false
10170	1100110000	false
10171	0010100000	false
10172	0001100000	false
10173	0000110000	false
10174	0000100000	false
10175	1100100000	false
10176	1010100000	false
10177	1001100000	false
10178	1000110000	false
10179	1000100000	false
10180	0111100000	false
10181	0111000010	false
10182	0111000000	false
10183	1111100000	false
10184	1111000010	false
10185	0011000010	false
10186	0011000000	false
10187	1111000000	false
10188	1011000010	false
10189	1011000000	false
10190	0101100000	false
10191	0101000010	false
10192	1101100000	false
10193	1101000010	false
10194	1001000010	false
10195	0001000010	false
10196	0110000010	false
10197	0110000000	false
10198	1110000010	false
10199	0010000010	false
10200	0010000000	false
10201	1110000000	false
10202	1010000010	false
10203	1010000000	false
10204	0101000000	false
10205	0100000010	false
10206	0100000000	false
10207	1101000000	false
10208	1100000010	false
10209	1100000000	false
10210	1001000000	false
10211	1000000010	false
10212	1000000000	false
10213	0001000000	false
10214	0000000010	false
10215	0000000000	false
