# Supplementary material
Source: publisher figshare collection journal article supplement (https://springernature.figshare.com/ndownloader/files/17562821)
Supplement: Supplementary file 1 [file 17562821 › CytoscapeSession-2018_09_25-21_15/tables/14312-STG%2C+Model+1%2C+Fluctuating+Inputs/LOCAL_ATTRS-org.cytoscape.model.CyEdge-STG%2C+Model+1%2C+Fluctuating+Inputs+root+default++edge.cytable]

CyCSV-Version	1
SUID	interaction	name	selected
java.lang.Long	java.lang.String	java.lang.String	java.lang.Boolean
STG, Model 1, Fluctuating Inputs root default edge
21436			false
21437			false
21438			false
21439			false
21440			false
21441			false
21442			false
21443			false
17347			false
21444			false
21445			false
17349			false
21446			false
17350			false
21447			false
17351			false
21448			false
17352			false
21449			false
17353			false
21450			false
17354			false
21451			false
21452			false
17356			false
21453			false
17357			false
21454			false
17358			false
21455			false
17359			false
21456			false
17360			false
21457			false
21458			false
17362			false
21459			false
17363			false
21460			false
17364			false
21461			false
17365			false
21462			false
17366			false
21463			false
17367			false
21464			false
17368			false
21465			false
21466			false
17370			false
21467			false
17371			false
21468			false
17372			false
21469			false
17373			false
21470			false
17374			false
21471			false
17375			false
21472			false
17376			false
21473			false
17377			false
21474			false
17378			false
21475			false
17379			false
21476			false
17380			false
21477			false
17381			false
21478			false
17382			false
21479			false
17383			false
21480			false
17384			false
21481			false
17385			false
21482			false
17386			false
21483			false
17387			false
21484			false
17388			false
21485			false
17389			false
21486			false
17390			false
21487			false
17391			false
21488			false
17392			false
21489			false
17393			false
21490			false
17394			false
21491			false
17395			false
21492			false
17396			false
21493			false
17397			false
21494			false
17398			false
21495			false
17399			false
21496			false
17400			false
21497			false
17401			false
21498			false
17402			false
21499			false
17403			false
21500			false
17404			false
21501			false
17405			false
21502			false
21503			false
21504			false
21505			false
17428			false
17429			false
17431			false
17432			false
17433			false
17434			false
17435			false
17436			false
17437			false
17438			false
17439			false
17440			false
17441			false
17442			false
17443			false
17444			false
17445			false
17446			false
17447			false
17448			false
17449			false
17450			false
17451			false
17452			false
17453			false
17454			false
17455			false
17456			false
17457			false
17459			false
17460			false
17461			false
17462			false
17463			false
17465			false
17466			false
17467			false
17468			false
17469			false
17471			false
17472			false
17473			false
17474			false
17475			false
17477			false
17478			false
17479			false
17480			false
17488			false
17490			false
17491			false
17492			false
17493			false
17494			false
17495			false
17496			false
17497			false
17498			false
17499			false
17500			false
17501			false
17502			false
17513			false
17514			false
17515			false
17516			false
17517			false
17518			false
17519			false
17520			false
17521			false
17522			false
17523			false
17524			false
17525			false
17526			false
17577			false
17579			false
17580			false
17581			false
17582			false
17583			false
17584			false
17586			false
17587			false
17588			false
17589			false
17590			false
17638			false
17639			false
17640			false
17641			false
17642			false
17643			false
17644			false
17645			false
17646			false
17647			false
17648			false
17649			false
17650			false
17651			false
17652			false
17653			false
17654			false
17655			false
17656			false
17657			false
17658			false
17677			false
17679			false
17680			false
17681			false
17682			false
17683			false
17684			false
17686			false
17687			false
17688			false
17689			false
17690			false
17691			false
17693			false
17694			false
17695			false
17696			false
17697			false
17698			false
17699			false
17700			false
17701			false
17702			false
17703			false
17704			false
17705			false
17713			false
17714			false
17716			false
17717			false
17718			false
17719			false
17720			false
17721			false
17722			false
17724			false
17725			false
17726			false
17727			false
17728			false
17729			false
17730			false
17732			false
17733			false
17734			false
17735			false
17736			false
17737			false
17738			false
17739			false
17740			false
17741			false
17742			false
17743			false
17744			false
17745			false
17746			false
17747			false
17748			false
17749			false
17750			false
17751			false
17752			false
17753			false
17754			false
17755			false
17756			false
17757			false
17758			false
17759			false
17760			false
17761			false
17762			false
17763			false
17764			false
17765			false
17766			false
17767			false
17822			false
17823			false
17824			false
17825			false
17826			false
17827			false
17828			false
17829			false
17830			false
17831			false
17832			false
17833			false
17834			false
17836			false
17837			false
17838			false
17840			false
17841			false
17872			false
17873			false
17874			false
17875			false
17876			false
17877			false
17878			false
17879			false
17890			false
17891			false
17892			false
17893			false
17894			false
17895			false
17896			false
17897			false
17898			false
17899			false
17900			false
17901			false
17902			false
17903			false
17904			false
17905			false
17906			false
17907			false
17908			false
17909			false
17910			false
17911			false
17912			false
17913			false
17914			false
17915			false
17916			false
17917			false
17918			false
17919			false
17920			false
17921			false
17922			false
17930			false
17931			false
17933			false
17934			false
17935			false
17936			false
17937			false
17939			false
17940			false
17941			false
17968			false
17970			false
17971			false
17972			false
17973			false
17975			false
17976			false
17977			false
18060			false
18061			false
18062			false
18063			false
18064			false
18065			false
18066			false
18067			false
18068			false
18069			false
18099			false
18100			false
18101			false
18102			false
18103			false
18104			false
18105			false
18106			false
18107			false
18108			false
18109			false
18110			false
18111			false
18112			false
18113			false
18114			false
18115			false
18116			false
18117			false
18118			false
18119			false
18120			false
18121			false
18122			false
18123			false
18124			false
18126			false
18127			false
18128			false
18129			false
18130			false
18131			false
18132			false
18133			false
18134			false
18153			false
18155			false
18156			false
18157			false
18165			false
18167			false
18168			false
18169			false
18170			false
18171			false
18173			false
18174			false
18175			false
18176			false
18177			false
18208			false
18210			false
18211			false
18212			false
18213			false
18215			false
18216			false
18217			false
18218			false
18219			false
18220			false
18221			false
18222			false
18223			false
18224			false
18225			false
18226			false
18227			false
18228			false
18229			false
18310			false
18311			false
18312			false
18313			false
18314			false
18315			false
18316			false
18317			false
18318			false
18319			false
18320			false
18321			false
18322			false
18323			false
18324			false
18325			false
18326			false
18327			false
18328			false
18329			false
18330			false
18331			false
18332			false
18333			false
18334			false
18335			false
18336			false
18337			false
18338			false
18339			false
18340			false
18341			false
18342			false
18343			false
18344			false
18345			false
18346			false
18347			false
18348			false
18349			false
18350			false
18351			false
18352			false
18353			false
18354			false
18355			false
18356			false
18357			false
18358			false
18359			false
18360			false
18361			false
18362			false
18363			false
18364			false
18365			false
18366			false
18368			false
18369			false
18370			false
18372			false
18373			false
18374			false
18375			false
18377			false
18378			false
18379			false
18381			false
18382			false
18383			false
18418			false
18419			false
18420			false
18421			false
18422			false
18423			false
18430			false
18431			false
18433			false
18434			false
18435			false
18436			false
18437			false
18438			false
18440			false
18441			false
18442			false
18443			false
18444			false
18445			false
18447			false
18448			false
18449			false
18450			false
18451			false
18452			false
18454			false
18455			false
18456			false
18457			false
18458			false
18464			false
18466			false
18467			false
18468			false
18469			false
18470			false
18472			false
18473			false
18474			false
18475			false
18476			false
18478			false
18479			false
18480			false
18481			false
18482			false
18484			false
18485			false
18486			false
18487			false
18488			false
18489			false
18490			false
18491			false
18492			false
18493			false
18494			false
18495			false
18496			false
18497			false
18498			false
18499			false
18500			false
18501			false
18502			false
18503			false
18504			false
18505			false
18506			false
18507			false
18508			false
18509			false
18510			false
18511			false
18512			false
18513			false
18514			false
18550			false
18552			false
18553			false
18554			false
18555			false
18556			false
18558			false
18559			false
18560			false
18561			false
18562			false
18571			false
18573			false
18574			false
18575			false
18576			false
18577			false
18579			false
18580			false
18581			false
18582			false
18583			false
18606			false
18607			false
18608			false
18609			false
18610			false
18611			false
18612			false
18613			false
18614			false
18615			false
18616			false
18617			false
18618			false
18619			false
18620			false
18621			false
18622			false
18623			false
18624			false
18625			false
18626			false
18627			false
18628			false
18629			false
18630			false
18631			false
18632			false
18633			false
18634			false
18635			false
18636			false
18637			false
18638			false
18639			false
18654			false
18655			false
18656			false
18657			false
18658			false
18659			false
18666			false
18667			false
18669			false
18670			false
18671			false
18672			false
18673			false
18675			false
18676			false
18677			false
18678			false
18679			false
18680			false
18682			false
18683			false
18684			false
18685			false
18686			false
18687			false
18688			false
18689			false
18691			false
18692			false
18693			false
18694			false
18695			false
18701			false
18703			false
18704			false
18705			false
18706			false
18707			false
18709			false
18710			false
18711			false
18712			false
18713			false
18715			false
18716			false
18717			false
18718			false
18719			false
18720			false
18721			false
18723			false
18724			false
18725			false
18726			false
18727			false
18837			false
18838			false
18839			false
18840			false
18841			false
18842			false
18843			false
18844			false
18845			false
18846			false
18847			false
18867			false
18868			false
18869			false
18870			false
18871			false
18872			false
18873			false
18874			false
18875			false
18876			false
18877			false
18890			false
18892			false
18893			false
18894			false
18895			false
18897			false
18898			false
18899			false
18900			false
18907			false
18909			false
18910			false
18911			false
18912			false
18914			false
18915			false
18916			false
18917			false
18975			false
18976			false
18977			false
18978			false
18979			false
18980			false
18981			false
18982			false
18983			false
18984			false
18985			false
18986			false
18987			false
18988			false
18989			false
18990			false
18991			false
18992			false
18993			false
18994			false
18995			false
18996			false
18997			false
18998			false
18999			false
19000			false
19001			false
19002			false
19003			false
19004			false
19005			false
19006			false
19007			false
19008			false
19009			false
19010			false
19011			false
19012			false
19013			false
19014			false
19015			false
19016			false
19017			false
19018			false
19019			false
19020			false
19021			false
19022			false
19023			false
19024			false
19025			false
19026			false
19027			false
19028			false
19029			false
19030			false
19031			false
19032			false
19033			false
19034			false
19035			false
19036			false
19037			false
19038			false
19039			false
19040			false
19041			false
19042			false
19043			false
19044			false
19045			false
19046			false
19047			false
19048			false
19049			false
19050			false
19051			false
19052			false
19053			false
19054			false
19055			false
19063			false
19065			false
19066			false
19067			false
19068			false
19069			false
19070			false
19071			false
19073			false
19074			false
19075			false
19076			false
19077			false
19078			false
19080			false
19081			false
19082			false
19083			false
19084			false
19085			false
19124			false
19126			false
19127			false
19128			false
19129			false
19130			false
19131			false
19132			false
19140			false
19142			false
19143			false
19144			false
19145			false
19146			false
19147			false
19148			false
19150			false
19151			false
19152			false
19153			false
19154			false
19155			false
19157			false
19158			false
19159			false
19160			false
19161			false
19162			false
19163			false
19165			false
19166			false
19167			false
19168			false
19169			false
19170			false
19171			false
19172			false
19173			false
19174			false
19175			false
19176			false
19177			false
19178			false
19179			false
19180			false
19181			false
19182			false
19184			false
19185			false
19186			false
19187			false
19188			false
19190			false
19191			false
19192			false
19193			false
19194			false
19195			false
19196			false
19197			false
19198			false
19199			false
19200			false
19202			false
19203			false
19204			false
19205			false
19207			false
19208			false
19209			false
19210			false
19211			false
19212			false
19213			false
19214			false
19215			false
19216			false
19217			false
19218			false
19219			false
19220			false
19221			false
19222			false
19223			false
19224			false
19225			false
19226			false
19227			false
19228			false
19229			false
19230			false
19231			false
19232			false
19233			false
19234			false
19235			false
19236			false
19237			false
19238			false
19239			false
19240			false
19241			false
19242			false
19243			false
19244			false
19245			false
19246			false
19247			false
19248			false
19249			false
19250			false
19251			false
19252			false
19253			false
19254			false
19255			false
19256			false
19258			false
19259			false
19260			false
19261			false
19262			false
19263			false
19264			false
19265			false
19266			false
19267			false
19268			false
19269			false
19270			false
19271			false
19273			false
19274			false
19275			false
19276			false
19277			false
19278			false
19279			false
19280			false
19281			false
19282			false
19283			false
19284			false
19285			false
19375			false
19376			false
19377			false
19378			false
19379			false
19380			false
19381			false
19382			false
19383			false
19384			false
19405			false
19406			false
19407			false
19408			false
19409			false
19410			false
19411			false
19412			false
19413			false
19414			false
19415			false
19463			false
19465			false
19466			false
19467			false
19468			false
19469			false
19471			false
19472			false
19473			false
19474			false
19475			false
19476			false
19477			false
19478			false
19479			false
19480			false
19481			false
19482			false
19483			false
15388			false
15389			false
19485			false
15390			false
19486			false
15391			false
19487			false
15392			false
19488			false
15393			false
19489			false
15394			false
19490			false
15395			false
15396			false
19492			false
15397			false
19493			false
15398			false
19494			false
19495			false
15400			false
19496			false
15401			false
19497			false
15402			false
19498			false
15403			false
19499			false
15404			false
19500			false
19501			false
15406			false
19502			false
15407			false
19503			false
15408			false
15409			false
15434			false
15435			false
15436			false
15437			false
15438			false
15439			false
15440			false
15441			false
15442			false
15443			false
15444			false
15445			false
15446			false
15447			false
15448			false
15450			false
15451			false
15452			false
15453			false
15454			false
15455			false
19551			false
19552			false
15457			false
19553			false
15458			false
19554			false
15459			false
19555			false
15460			false
19556			false
15461			false
19557			false
19558			false
19559			false
19560			false
19561			false
19562			false
19563			false
19564			false
19565			false
19566			false
19567			false
19568			false
19569			false
19570			false
19571			false
19572			false
19573			false
19574			false
19575			false
19576			false
19577			false
19578			false
19579			false
19580			false
19581			false
19582			false
19583			false
15488			false
19584			false
15489			false
19585			false
15490			false
19586			false
15491			false
19587			false
15492			false
19588			false
15493			false
19589			false
15494			false
19590			false
15495			false
15496			false
15497			false
15498			false
15499			false
15500			false
15502			false
15503			false
15504			false
15505			false
15507			false
15508			false
15509			false
19616			false
19617			false
19618			false
19619			false
19620			false
19621			false
19622			false
19623			false
19624			false
19625			false
19626			false
19642			false
19644			false
19645			false
19646			false
19647			false
19648			false
19649			false
19650			false
19651			false
19652			false
19653			false
19654			false
19655			false
15560			false
19656			false
15561			false
19657			false
15562			false
19658			false
15563			false
19659			false
15564			false
19660			false
15565			false
15566			false
19662			false
15567			false
19663			false
15568			false
19664			false
15569			false
19665			false
15570			false
19666			false
15571			false
19667			false
15572			false
19668			false
15573			false
19669			false
15574			false
19670			false
15575			false
19671			false
15576			false
19672			false
15577			false
19673			false
15578			false
19674			false
15579			false
19675			false
15580			false
19676			false
15581			false
19677			false
15582			false
19685			false
19686			false
15591			false
19688			false
15593			false
19689			false
15594			false
19690			false
15595			false
19691			false
15596			false
19692			false
15597			false
19699			false
19701			false
19702			false
15607			false
19703			false
15608			false
19704			false
19705			false
15610			false
19706			false
15611			false
19707			false
15612			false
19708			false
15613			false
19709			false
15614			false
19710			false
15615			false
19711			false
19712			false
15617			false
19713			false
15618			false
19714			false
15619			false
19715			false
15620			false
19716			false
15621			false
19717			false
19718			false
15623			false
19719			false
15624			false
19720			false
15625			false
19721			false
15626			false
19722			false
19723			false
19724			false
19725			false
19726			false
19727			false
19728			false
19729			false
19730			false
19731			false
19732			false
19740			false
19741			false
19743			false
19744			false
19745			false
19746			false
19747			false
19749			false
19750			false
19751			false
19752			false
19753			false
19755			false
19756			false
19757			false
19764			false
19766			false
19767			false
19768			false
19769			false
19771			false
19772			false
19773			false
19774			false
19776			false
19777			false
19778			false
15692			false
15693			false
15694			false
15695			false
15696			false
15697			false
15698			false
15699			false
15700			false
15701			false
15702			false
15703			false
15704			false
15705			false
15706			false
15707			false
15708			false
15709			false
15710			false
15711			false
15712			false
15713			false
15714			false
15715			false
15716			false
15717			false
15718			false
15719			false
15720			false
15721			false
15722			false
15723			false
15732			false
15733			false
15735			false
15736			false
15737			false
15738			false
15739			false
15740			false
15741			false
15742			false
15744			false
15745			false
15746			false
15747			false
15748			false
15749			false
15750			false
15751			false
15753			false
15754			false
15755			false
15756			false
15757			false
15758			false
15759			false
15767			false
15769			false
15770			false
15771			false
15772			false
15773			false
15774			false
15775			false
15777			false
15778			false
15779			false
15780			false
15781			false
15782			false
15783			false
15785			false
15786			false
15787			false
15788			false
15789			false
15790			false
15791			false
15792			false
15793			false
15794			false
15795			false
15796			false
15797			false
15798			false
15799			false
19908			false
19909			false
19910			false
19911			false
19912			false
19913			false
19914			false
19915			false
19916			false
19917			false
19918			false
19919			false
19920			false
19921			false
19922			false
19923			false
19924			false
19925			false
15830			false
19926			false
19927			false
15832			false
19928			false
15833			false
19929			false
15834			false
15836			false
15837			false
15857			false
15858			false
15859			false
15860			false
15861			false
15862			false
15863			false
15864			false
15865			false
15866			false
15867			false
19963			false
15868			false
19964			false
15869			false
19965			false
15870			false
19966			false
15871			false
19967			false
15872			false
19968			false
15873			false
15874			false
15875			false
15876			false
15877			false
15878			false
15879			false
19975			false
15880			false
19976			false
15882			false
19978			false
15883			false
19979			false
15884			false
19980			false
19981			false
15886			false
19982			false
15887			false
19983			false
19985			false
19986			false
19987			false
19988			false
19989			false
15894			false
19990			false
15895			false
19991			false
15896			false
19992			false
15897			false
15898			false
19994			false
19995			false
19996			false
19997			false
19998			false
20004			false
20006			false
20007			false
20008			false
20009			false
15914			false
20010			false
15915			false
15916			false
20012			false
15917			false
20013			false
15918			false
20014			false
20015			false
20016			false
20017			false
20018			false
20020			false
20021			false
20022			false
20023			false
20024			false
20025			false
20026			false
20027			false
20028			false
20029			false
20030			false
20031			false
20032			false
20033			false
20034			false
20035			false
20036			false
20037			false
20038			false
20039			false
20040			false
20041			false
20042			false
15969			false
15971			false
15972			false
15973			false
15974			false
15976			false
15977			false
15978			false
20094			false
20095			false
16000			false
20096			false
16001			false
20097			false
16002			false
20098			false
16003			false
20099			false
16004			false
20100			false
16005			false
20101			false
16006			false
20102			false
16007			false
20103			false
16008			false
20104			false
16009			false
20105			false
16010			false
20106			false
16011			false
20107			false
16012			false
20108			false
16013			false
20109			false
16014			false
20110			false
16015			false
20111			false
20112			false
16016			false
20113			false
16017			false
20114			false
16018			false
20115			false
16019			false
20116			false
16020			false
20117			false
16021			false
20118			false
20119			false
20120			false
20121			false
20122			false
20123			false
20124			false
20125			false
20126			false
20127			false
20128			false
16032			false
20129			false
20130			false
16034			false
20131			false
16035			false
20132			false
16036			false
20133			false
16037			false
20134			false
16038			false
20135			false
20136			false
16040			false
20137			false
16041			false
20138			false
16042			false
20139			false
16043			false
20140			false
16044			false
20141			false
16045			false
20142			false
20143			false
16047			false
20144			false
16048			false
20145			false
16049			false
16050			false
20147			false
16051			false
20148			false
20149			false
16053			false
20150			false
16054			false
16055			false
20152			false
16056			false
20153			false
16057			false
20154			false
16058			false
20155			false
16059			false
20156			false
16060			false
16061			false
20158			false
16062			false
20159			false
16063			false
20160			false
16064			false
20161			false
16065			false
16066			false
20163			false
16067			false
20164			false
16068			false
20165			false
20166			false
16070			false
16071			false
16072			false
16073			false
16075			false
16076			false
16077			false
16078			false
16079			false
16080			false
16081			false
16082			false
16083			false
16084			false
16085			false
16086			false
16087			false
16088			false
16090			false
16091			false
16092			false
16093			false
16095			false
16096			false
16097			false
20213			false
20214			false
20215			false
20216			false
20217			false
20218			false
20225			false
20226			false
20228			false
20229			false
20230			false
20231			false
20232			false
20233			false
20235			false
20236			false
20237			false
20238			false
20239			false
20240			false
20242			false
20243			false
20244			false
20245			false
20246			false
20247			false
20249			false
20250			false
20251			false
20252			false
20253			false
20254			false
20256			false
20257			false
20258			false
20259			false
20260			false
20266			false
20268			false
20269			false
20270			false
20271			false
20272			false
20274			false
20275			false
20276			false
20277			false
20278			false
20280			false
20281			false
20282			false
20283			false
20284			false
20286			false
20287			false
20288			false
20289			false
20290			false
20292			false
20293			false
20294			false
20295			false
20296			false
16200			false
20297			false
16201			false
20298			false
16202			false
20299			false
16203			false
20300			false
16204			false
20301			false
16205			false
20302			false
16206			false
20303			false
16207			false
20304			false
16208			false
20305			false
16209			false
20306			false
16210			false
20307			false
16211			false
20308			false
16212			false
20309			false
16213			false
20310			false
16214			false
20311			false
16215			false
20312			false
16216			false
20313			false
16217			false
20314			false
16218			false
20315			false
16219			false
20316			false
16220			false
20317			false
16221			false
20318			false
16222			false
20319			false
16223			false
20320			false
16224			false
20321			false
16225			false
20322			false
16226			false
20323			false
16227			false
20324			false
16228			false
20325			false
16229			false
20326			false
20327			false
16248			false
16250			false
16251			false
16252			false
16253			false
16254			false
16255			false
16257			false
20354			false
16258			false
20355			false
16259			false
20356			false
16260			false
20357			false
16261			false
20358			false
16262			false
20359			false
16263			false
20360			false
20361			false
16265			false
20362			false
16266			false
20363			false
16267			false
20364			false
16268			false
20365			false
16269			false
20366			false
16270			false
20367			false
20368			false
16272			false
20369			false
16273			false
20370			false
16274			false
20371			false
16275			false
16276			false
16277			false
20390			false
20391			false
20392			false
20393			false
20394			false
20395			false
20396			false
20397			false
20398			false
20399			false
20400			false
20401			false
20402			false
16306			false
20403			false
16307			false
20404			false
16308			false
20405			false
16309			false
20406			false
16310			false
20407			false
16311			false
20408			false
16312			false
20409			false
16313			false
20410			false
16314			false
20411			false
16315			false
20412			false
16316			false
20413			false
16317			false
20414			false
16318			false
20415			false
16319			false
16320			false
16321			false
16322			false
16323			false
16324			false
16325			false
16326			false
16327			false
16332			false
16333			false
16334			false
16335			false
16336			false
16337			false
16338			false
16339			false
16340			false
20444			false
20446			false
20447			false
20448			false
20449			false
20450			false
20452			false
20453			false
20454			false
20455			false
16359			false
20456			false
20457			false
16361			false
16362			false
20459			false
16363			false
20460			false
16364			false
20461			false
16365			false
20462			false
20463			false
16367			false
16368			false
20465			false
16369			false
20466			false
16370			false
20467			false
20468			false
16372			false
20469			false
16373			false
16374			false
16375			false
16376			false
16378			false
16379			false
16380			false
16381			false
16382			false
16384			false
16385			false
16386			false
16387			false
16389			false
16390			false
16391			false
16392			false
16393			false
16394			false
16395			false
16396			false
16397			false
16398			false
16399			false
16400			false
16401			false
16402			false
16403			false
16404			false
[truncated: 3,636 more rows]
