# Supplementary material
Source: publisher figshare collection journal article supplement (https://springernature.figshare.com/ndownloader/files/17562821)
Supplement: Supplementary file 1 [file 17562821 › CytoscapeSession-2018_09_25-21_15/tables/14312-STG%2C+Model+1%2C+Fluctuating+Inputs/LOCAL_ATTRS-org.cytoscape.model.CyNetwork-STG%2C+Model+1%2C+Fluctuating+Inputs+root+default++network.cytable]

"CyCSV-Version","1"
"SUID","name","selected"
"java.lang.Long","java.lang.String","java.lang.Boolean"
"","",""
"STG, Model 1, Fluctuating Inputs root default  network",""
"14312","STG, Model 1, Fluctuating Inputs","false"
