# Supplementary material
Source: publisher figshare collection journal article supplement (https://springernature.figshare.com/ndownloader/files/17562821)
Supplement: Supplementary file 1 [file 17562821 › CytoscapeSession-2018_09_25-21_15/tables/14312-STG%2C+Model+1%2C+Fluctuating+Inputs/LOCAL_ATTRS-org.cytoscape.model.CyNode-STG%2C+Model+1%2C+Fluctuating+Inputs+root+default++node.cytable]

CyCSV-Version	1
SUID	name	selected
java.lang.Long	java.lang.String	java.lang.Boolean
STG, Model 1, Fluctuating Inputs root default node
14442		false
14441		false
14440		false
14435		false
14434		false
14425		false
14422		false
14419		false
14418		false
14417		false
14416		false
14415		false
14414		false
14409		false
14408		false
14403		false
14402		false
14401		false
14400		false
14399		false
14397		false
14396		false
14395		false
14393		false
14392		false
14391		false
14390		false
14379		false
14378		false
14377		false
14375		false
14373		false
14372		false
14371		false
14370		false
14361		false
14360		false
14359		false
14358		false
14353		false
14352		false
14351		false
14350		false
14345		false
14344		false
14343		false
14342		false
15361		false
15360		false
15359		false
15358		false
15357		false
15356		false
15355		false
15354		false
15353		false
15352		false
15351		false
15350		false
15349		false
15348		false
15347		false
15346		false
15333		false
15332		false
15331		false
15330		false
15329		false
15328		false
15327		false
15326		false
15325		false
15324		false
15309		false
15308		false
15307		false
15306		false
15304		false
15303		false
15302		false
15301		false
15300		false
15298		false
15297		false
15296		false
15295		false
15294		false
15283		false
15282		false
15280		false
15279		false
15277		false
15276		false
15275		false
15274		false
15273		false
15272		false
15271		false
15270		false
15269		false
15268		false
15267		false
15266		false
15265		false
15264		false
15263		false
15262		false
15261		false
15260		false
15259		false
15258		false
15257		false
15256		false
15255		false
15254		false
15229		false
15228		false
15227		false
15226		false
15225		false
15224		false
15223		false
15222		false
15221		false
15220		false
15219		false
15218		false
15217		false
15216		false
15215		false
15214		false
15213		false
15212		false
15211		false
15210		false
15209		false
15208		false
15207		false
15206		false
15205		false
15204		false
15203		false
15202		false
15178		false
15177		false
15176		false
15175		false
15169		false
15168		false
15167		false
15166		false
15161		false
15160		false
15159		false
15158		false
15153		false
15152		false
15151		false
15150		false
15149		false
15148		false
15147		false
15146		false
15145		false
15144		false
15143		false
15141		false
15140		false
15139		false
15138		false
15137		false
15135		false
15127		false
15126		false
15125		false
15124		false
15123		false
15122		false
15121		false
15120		false
15119		false
15118		false
15117		false
15116		false
15115		false
15107		false
15106		false
15105		false
15104		false
15103		false
15102		false
15101		false
15099		false
15098		false
15097		false
15095		false
15087		false
15086		false
15085		false
15063		false
15062		false
15061		false
15059		false
15058		false
15057		false
15055		false
15054		false
15053		false
15052		false
15051		false
15050		false
15049		false
15047		false
15045		false
15044		false
15043		false
15042		false
15041		false
15040		false
15036		false
15035		false
15030		false
15029		false
15028		false
15027		false
15026		false
15025		false
15017		false
15016		false
15015		false
15014		false
15013		false
15012		false
15011		false
15010		false
15001		false
15000		false
14996		false
14995		false
14977		false
14976		false
14975		false
14974		false
14973		false
14972		false
14971		false
14970		false
14969		false
14968		false
14967		false
14966		false
14965		false
14964		false
14963		false
14962		false
14961		false
14960		false
14959		false
14958		false
14957		false
14956		false
14955		false
14954		false
14953		false
14952		false
14950		false
14943		false
14942		false
14941		false
14939		false
14938		false
14937		false
14936		false
14935		false
14934		false
14933		false
14932		false
14931		false
14930		false
14929		false
14928		false
14920		false
14919		false
14917		false
14916		false
14913		false
14912		false
14907		false
14906		false
14889		false
14888		false
14887		false
14886		false
14884		false
14883		false
14882		false
14881		false
14879		false
14874		false
14873		false
14872		false
14871		false
14870		false
14865		false
14864		false
14862		false
14861		false
14854		false
14853		false
14852		false
14851		false
14850		false
14849		false
14848		false
14847		false
14845		false
14844		false
14843		false
14842		false
14840		false
14834		false
14833		false
14832		false
14831		false
14830		false
14829		false
14828		false
14827		false
14826		false
14825		false
14824		false
14823		false
14822		false
14821		false
14820		false
14809		false
14808		false
14807		false
14806		false
14799		false
14798		false
14796		false
14791		false
14790		false
14789		false
14788		false
14787		false
14786		false
14785		false
14779		false
14778		false
14762		false
14761		false
14756		false
14755		false
14753		false
14752		false
14751		false
14750		false
14749		false
14748		false
14745		false
14744		false
14738		false
14737		false
14736		false
14735		false
14727		false
14726		false
14725		false
14724		false
14723		false
14722		false
14721		false
14720		false
14719		false
14717		false
14716		false
14715		false
14714		false
14710		false
14709		false
14708		false
14699		false
14698		false
14689		false
14688		false
14685		false
14684		false
14683		false
14681		false
14680		false
14679		false
14678		false
14677		false
14676		false
14675		false
14674		false
14673		false
14669		false
14668		false
14667		false
14666		false
14665		false
14664		false
14663		false
14662		false
14661		false
14660		false
14649		false
14648		false
14647		false
14646		false
14645		false
14644		false
14641		false
14638		false
14633		false
14632		false
14631		false
14630		false
14628		false
14627		false
14626		false
14625		false
14623		false
14618		false
14617		false
14616		false
14615		false
14614		false
14607		false
14606		false
14605		false
14604		false
14596		false
14595		false
14594		false
14593		false
14587		false
14586		false
14585		false
14584		false
14581		false
14580		false
14577		false
14576		false
14571		false
14570		false
14569		false
14568		false
14566		false
14565		false
14561		false
14560		false
14557		false
14556		false
14555		false
14554		false
14553		false
14552		false
14551		false
14550		false
14545		false
14544		false
14543		false
14542		false
14533		false
14532		false
14530		false
14529		false
14515		false
14514		false
14511		false
14510		false
14509		false
14508		false
14507		false
14506		false
14505		false
14504		false
14503		false
14502		false
14501		false
14500		false
14496		false
14495		false
14493		false
14492		false
14491		false
14490		false
14485		false
14484		false
14483		false
14482		false
14477		false
14476		false
14475		false
14474		false
14457		false
14456		false
14455		false
14454		false
14453		false
14452		false
14451		false
14450		false
14449		false
14448		false
14447		false
14446		false
14443		false
14439		false
14438		false
14437		false
14436		false
14433		false
14432		false
14431		false
14430		false
14429		false
14428		false
14427		false
14426		false
14424		false
14423		false
14421		false
14420		false
14413		false
14412		false
14411		false
14410		false
14407		false
14406		false
14405		false
14404		false
14398		false
14394		false
14389		false
14388		false
14387		false
14386		false
14385		false
14384		false
14383		false
14382		false
14381		false
14380		false
14376		false
14374		false
14369		false
14368		false
14367		false
14366		false
14365		false
14364		false
14363		false
14362		false
14357		false
14356		false
14355		false
14354		false
14349		false
14348		false
14347		false
14346		false
14341		false
14340		false
14339		false
14338		false
15345		false
15344		false
15343		false
15342		false
15341		false
15340		false
15339		false
15338		false
15337		false
15336		false
15335		false
15334		false
15323		false
15322		false
15321		false
15320		false
15319		false
15318		false
15317		false
15316		false
15315		false
15314		false
15313		false
15312		false
15311		false
15310		false
15305		false
15299		false
15293		false
15292		false
15291		false
15290		false
15289		false
15288		false
15287		false
15286		false
15285		false
15284		false
15281		false
15278		false
15253		false
15252		false
15251		false
15250		false
15249		false
15248		false
15247		false
15246		false
15245		false
15244		false
15243		false
15242		false
15241		false
15240		false
15239		false
15238		false
15237		false
15236		false
15235		false
15234		false
15233		false
15232		false
15231		false
15230		false
15201		false
15200		false
15199		false
15198		false
15197		false
15196		false
15195		false
15194		false
15193		false
15192		false
15191		false
15190		false
15189		false
15188		false
15187		false
15186		false
15185		false
15184		false
15183		false
15182		false
15181		false
15180		false
15179		false
15174		false
15173		false
15172		false
15171		false
15170		false
15165		false
15164		false
15163		false
15162		false
15157		false
15156		false
15155		false
15154		false
15142		false
15136		false
15134		false
15133		false
15132		false
15131		false
15130		false
15129		false
15128		false
15114		false
15113		false
15112		false
15111		false
15110		false
15109		false
15108		false
15100		false
15096		false
15094		false
15093		false
15092		false
15091		false
15090		false
15089		false
15088		false
15084		false
15083		false
15082		false
15081		false
15080		false
15079		false
15078		false
15077		false
15076		false
15075		false
15074		false
15073		false
15072		false
15071		false
15070		false
15069		false
15068		false
15067		false
15066		false
15065		false
15064		false
15060		false
15056		false
15048		false
15046		false
15039		false
15038		false
15037		false
15034		false
15033		false
15032		false
15031		false
15024		false
15023		false
15022		false
15021		false
15020		false
15019		false
15018		false
15009		false
15008		false
15007		false
15006		false
15005		false
15004		false
15003		false
15002		false
14999		false
14998		false
14997		false
14994		false
14993		false
14992		false
14991		false
14990		false
14989		false
14988		false
14987		false
14986		false
14985		false
14984		false
14983		false
14982		false
14981		false
14980		false
14979		false
14978		false
14951		false
14949		false
14948		false
14947		false
14946		false
14945		false
14944		false
14940		false
14927		false
14926		false
14925		false
14924		false
14923		false
14922		false
14921		false
14918		false
14915		false
14914		false
14911		false
14910		false
14909		false
14908		false
14905		false
14904		false
14903		false
14902		false
14901		false
14900		false
14899		false
14898		false
14897		false
14896		false
14895		false
14894		false
14893		false
14892		false
14891		false
14890		false
14885		false
14880		false
14878		false
14877		false
14876		false
14875		false
14869		false
14868		false
14867		false
14866		false
14863		false
14860		false
14859		false
14858		false
14857		false
14856		false
14855		false
14846		false
14841		false
14839		false
14838		false
14837		false
14836		false
14835		false
14819		false
14818		false
14817		false
14816		false
14815		false
14814		false
14813		false
14812		false
14811		false
14810		false
14805		false
14804		false
14803		false
14802		false
14801		false
14800		false
14797		false
14795		false
14794		false
14793		false
14792		false
14784		false
14783		false
14782		false
14781		false
14780		false
14777		false
14776		false
14775		false
14774		false
14773		false
14772		false
14771		false
14770		false
14769		false
14768		false
14767		false
14766		false
14765		false
14764		false
14763		false
14760		false
14759		false
14758		false
14757		false
14754		false
14747		false
14746		false
14743		false
14742		false
14741		false
14740		false
14739		false
14734		false
14733		false
14732		false
14731		false
14730		false
14729		false
14728		false
14718		false
14713		false
14712		false
14711		false
14707		false
14706		false
14705		false
14704		false
14703		false
14702		false
14701		false
14700		false
14697		false
14696		false
14695		false
14694		false
14693		false
14692		false
14691		false
14690		false
14687		false
14686		false
14682		false
14672		false
14671		false
14670		false
14659		false
14658		false
14657		false
14656		false
14655		false
14654		false
14653		false
14652		false
14651		false
14650		false
14643		false
14642		false
14640		false
14639		false
14637		false
14636		false
14635		false
14634		false
14629		false
14624		false
14622		false
14621		false
14620		false
14619		false
14613		false
14612		false
14611		false
14610		false
14609		false
14608		false
14603		false
14602		false
14601		false
14600		false
14599		false
14598		false
14597		false
14592		false
14591		false
14590		false
14589		false
14588		false
14583		false
14582		false
14579		false
14578		false
14575		false
14574		false
14573		false
14572		false
14567		false
14564		false
14563		false
14562		false
14559		false
14558		false
14549		false
14548		false
14547		false
14546		false
14541		false
14540		false
14539		false
14538		false
14537		false
14536		false
14535		false
14534		false
14531		false
14528		false
14527		false
14526		false
14525		false
14524		false
14523		false
14522		false
14521		false
14520		false
14519		false
14518		false
14517		false
14516		false
14513		false
14512		false
14499		false
14498		false
14497		false
14494		false
14489		false
14488		false
14487		false
14486		false
14481		false
14480		false
14479		false
14478		false
14473		false
14472		false
14471		false
14470		false
14469		false
14468		false
14467		false
14466		false
14465		false
14464		false
14463		false
14462		false
14461		false
14460		false
14459		false
14458		false
14445		false
14444		false
