# Supplementary material
Source: publisher figshare collection journal article supplement (https://springernature.figshare.com/ndownloader/files/17562821)
Supplement: Supplementary file 1 [file 17562821 › CytoscapeSession-2018_09_25-21_15/tables/14312-STG%2C+Model+1%2C+Fluctuating+Inputs/SHARED_ATTRS-org.cytoscape.model.CyEdge-STG%2C+Model+1%2C+Fluctuating+Inputs+root+shared++edge.cytable]

CyCSV-Version	1
SUID	shared interaction	shared name
java.lang.Long	java.lang.String	java.lang.String
STG, Model 1, Fluctuating Inputs root shared edge
21436	1	1101000000 (1) 0101000000
21437	1	1101000000 (1) 1101100000
21438	1	1101000000 (1) 1101000010
21439	1	1101000000 (1) 1101000001
21440	1	1100000010 (1) 0100000010
21441	1	1100000010 (1) 1101000010
21442	1	1100000010 (1) 1100000011
21443	1	1100000001 (1) 0100000001
17347	1	0000100110 (1) 1000100110
21444	1	1100000001 (1) 1101000001
21445	1	1100000001 (1) 1100000101
17349	1	0000100110 (1) 0001100110
21446	1	1100000001 (1) 1100000011
17350	1	0000100110 (1) 0000110110
21447	1	1100000001 (1) 1100000000
17351	1	0000100110 (1) 0000100010
21448	1	0101000000 (1) 1101000000
17352	1	0000100110 (1) 0000100100
21449	1	0101000000 (1) 0001000000
17353	1	0000100110 (1) 0000100111
21450	1	0101000000 (1) 0101100000
17354	1	0000000111 (1) 1000000111
21451	1	0101000000 (1) 0101000010
21452	1	0101000000 (1) 0101000001
17356	1	0000000111 (1) 0001000111
21453	1	0100000010 (1) 1100000010
17357	1	0000000111 (1) 0000100111
21454	1	0100000010 (1) 0000000010
17358	1	0000000111 (1) 0000000110
21455	1	0100000010 (1) 0101000010
17359	1	1000100110 (1) 0000100110
21456	1	0100000010 (1) 0100000011
17360	1	1000100110 (1) 1100100110
21457	1	0100000001 (1) 1100000001
21458	1	0100000001 (1) 0000000001
17362	1	1000100110 (1) 1001100110
21459	1	0100000001 (1) 0101000001
17363	1	1000100110 (1) 1000110110
21460	1	0100000001 (1) 0100000101
17364	1	1000100110 (1) 1000100010
21461	1	0100000001 (1) 0100000011
17365	1	1000100110 (1) 1000100100
21462	1	0100000001 (1) 0100000000
17366	1	1000100110 (1) 1000100111
21463	1	0100000000 (1) 1100000000
17367	1	1000000111 (1) 0000000111
21464	1	0100000000 (1) 0000000000
17368	1	1000000111 (1) 1100000111
21465	1	0100000000 (1) 0101000000
21466	1	0100000000 (1) 0100000010
17370	1	1000000111 (1) 1001000111
21467	1	0100000000 (1) 0100000001
17371	1	1000000111 (1) 1000100111
21468	1	1100000000 (1) 0100000000
17372	1	1000000111 (1) 1000000110
21469	1	1100000000 (1) 1101000000
17373	1	1101101101 (1) 0101101101
21470	1	1100000000 (1) 1100000010
17374	1	1101101101 (1) 1101111101
21471	1	1100000000 (1) 1100000001
17375	1	1101101101 (1) 1101100101
21472	1	1001000000 (1) 0001000000
17376	1	1101101101 (1) 1101101100
21473	1	1001000000 (1) 1101000000
17377	1	0101101101 (1) 1101101101
21474	1	1001000000 (1) 1001000010
17378	1	0101101101 (1) 0001101101
21475	1	1001000000 (1) 1001000001
17379	1	0101101101 (1) 0101111101
21476	1	1000000010 (1) 0000000010
17380	1	0101101101 (1) 0101100101
21477	1	1000000010 (1) 1100000010
17381	1	0101101101 (1) 0101101100
21478	1	1000000010 (1) 1001000010
17382	1	1100011110 (1) 0100011110
21479	1	1000000010 (1) 1000000011
17383	1	1100011110 (1) 1000011110
21480	1	1000000001 (1) 0000000001
17384	1	1100011110 (1) 1101011110
21481	1	1000000001 (1) 1100000001
17385	1	1100011110 (1) 1100001110
21482	1	1000000001 (1) 1001000001
17386	1	1100011110 (1) 1100010110
21483	1	1000000001 (1) 1000000101
17387	1	1100011110 (1) 1100011111
21484	1	1000000001 (1) 1000000011
17388	1	1100011101 (1) 0100011101
21485	1	1000000001 (1) 1000000000
17389	1	1100011101 (1) 1000011101
21486	1	1000000000 (1) 0000000000
17390	1	1100011101 (1) 1101011101
21487	1	1000000000 (1) 1100000000
17391	1	1100011101 (1) 1100001101
21488	1	1000000000 (1) 1001000000
17392	1	1100011101 (1) 1100011111
21489	1	1000000000 (1) 1000000010
17393	1	1100011101 (1) 1100011100
21490	1	1000000000 (1) 1000000001
17394	1	0100011110 (1) 1100011110
21491	1	0001000000 (1) 1001000000
17395	1	0100011110 (1) 0000011110
21492	1	0001000000 (1) 0001000010
17396	1	0100011110 (1) 0101011110
21493	1	0001000000 (1) 0001000001
17397	1	0100011110 (1) 0100001110
21494	1	0000000010 (1) 1000000010
17398	1	0100011110 (1) 0100010110
21495	1	0000000010 (1) 0001000010
17399	1	0100011110 (1) 0100011111
21496	1	0000000010 (1) 0000000011
17400	1	0100011101 (1) 1100011101
21497	1	0000000001 (1) 1000000001
17401	1	0100011101 (1) 0000011101
21498	1	0000000001 (1) 0001000001
17402	1	0100011101 (1) 0101011101
21499	1	0000000001 (1) 0000000101
17403	1	0100011101 (1) 0100001101
21500	1	0000000001 (1) 0000000011
17404	1	0100011101 (1) 0100011111
21501	1	0000000001 (1) 0000000000
17405	1	0100011101 (1) 0100011100
21502	1	0000000000 (1) 1000000000
21503	1	0000000000 (1) 0001000000
21504	1	0000000000 (1) 0000000010
21505	1	0000000000 (1) 0000000001
17428	1	1001101101 (1) 0001101101
17429	1	1001101101 (1) 1101101101
17431	1	1001101101 (1) 1001001101
17432	1	1001101101 (1) 1001111101
17433	1	1001101101 (1) 1001100101
17434	1	1001101101 (1) 1001101100
17435	1	0101101010 (1) 1101101010
17436	1	0101101010 (1) 0001101010
17437	1	0101101010 (1) 0101111010
17438	1	0101101010 (1) 0101100010
17439	1	0101101010 (1) 0101101000
17440	1	0101101010 (1) 0101101011
17441	1	0101001011 (1) 1101001011
17442	1	0101001011 (1) 0001001011
17443	1	0101001011 (1) 0101101011
17444	1	0101001011 (1) 0101000011
17445	1	0101001011 (1) 0101001111
17446	1	0101001011 (1) 0101001010
17447	1	1101101010 (1) 0101101010
17448	1	1101101010 (1) 1101111010
17449	1	1101101010 (1) 1101100010
17450	1	1101101010 (1) 1101101000
17451	1	1101101010 (1) 1101101011
17452	1	1101001011 (1) 0101001011
17453	1	1101001011 (1) 1101101011
17454	1	1101001011 (1) 1101000011
17455	1	1101001011 (1) 1101001111
17456	1	1101001011 (1) 1101001010
17457	1	0000011110 (1) 1000011110
17459	1	0000011110 (1) 0001011110
17460	1	0000011110 (1) 0000001110
17461	1	0000011110 (1) 0000010110
17462	1	0000011110 (1) 0000011111
17463	1	0000011101 (1) 1000011101
17465	1	0000011101 (1) 0001011101
17466	1	0000011101 (1) 0000001101
17467	1	0000011101 (1) 0000011111
17468	1	0000011101 (1) 0000011100
17469	1	1000011110 (1) 0000011110
17471	1	1000011110 (1) 1001011110
17472	1	1000011110 (1) 1000001110
17473	1	1000011110 (1) 1000010110
17474	1	1000011110 (1) 1000011111
17475	1	1000011101 (1) 0000011101
17477	1	1000011101 (1) 1001011101
17478	1	1000011101 (1) 1000001101
17479	1	1000011101 (1) 1000011111
17480	1	1000011101 (1) 1000011100
17488	1	0001101101 (1) 1001101101
17490	1	0001101101 (1) 0001001101
17491	1	0001101101 (1) 0001111101
17492	1	0001101101 (1) 0001100101
17493	1	0001101101 (1) 0001101100
17494	1	0001001011 (1) 1001001011
17495	1	0001001011 (1) 0001000011
17496	1	0001001011 (1) 0001001111
17497	1	0001001011 (1) 0001001010
17498	1	1001001011 (1) 0001001011
17499	1	1001001011 (1) 1101001011
17500	1	1001001011 (1) 1001000011
17501	1	1001001011 (1) 1001001111
17502	1	1001001011 (1) 1001001010
17513	1	0100110011 (1) 1100110011
17514	1	0100110011 (1) 0000110011
17515	1	0100110011 (1) 0101110011
17516	1	0100110011 (1) 0100010011
17517	1	0100110011 (1) 0100110111
17518	1	0100110011 (1) 0100110001
17519	1	0100110011 (1) 0100110010
17520	1	1100110011 (1) 0100110011
17521	1	1100110011 (1) 1000110011
17522	1	1100110011 (1) 1101110011
17523	1	1100110011 (1) 1100010011
17524	1	1100110011 (1) 1100110111
17525	1	1100110011 (1) 1100110001
17526	1	1100110011 (1) 1100110010
17577	1	1000110011 (1) 0000110011
17579	1	1000110011 (1) 1001110011
17580	1	1000110011 (1) 1000010011
17581	1	1000110011 (1) 1000110111
17582	1	1000110011 (1) 1000110001
17583	1	1000110011 (1) 1000110010
17584	1	0000110011 (1) 1000110011
17586	1	0000110011 (1) 0001110011
17587	1	0000110011 (1) 0000010011
17588	1	0000110011 (1) 0000110111
17589	1	0000110011 (1) 0000110001
17590	1	0000110011 (1) 0000110010
17638	1	1100101101 (1) 0100101101
17639	1	1100101101 (1) 1101101101
17640	1	1100101101 (1) 1100001101
17641	1	1100101101 (1) 1100111101
17642	1	1100101101 (1) 1100100101
17643	1	1100101101 (1) 1100101100
17644	1	0100101101 (1) 1100101101
17645	1	0100101101 (1) 0000101101
17646	1	0100101101 (1) 0101101101
17647	1	0100101101 (1) 0100001101
17648	1	0100101101 (1) 0100111101
17649	1	0100101101 (1) 0100100101
17650	1	0100101101 (1) 0100101100
17651	1	0100101100 (1) 1100101100
17652	1	0100101100 (1) 0000101100
17653	1	0100101100 (1) 0101101100
17654	1	0100101100 (1) 0100001100
17655	1	0100101100 (1) 0100111100
17656	1	0100101100 (1) 0100100100
17657	1	0100101100 (1) 0100101000
17658	1	0100101100 (1) 0100101101
17677	1	0001101100 (1) 1001101100
17679	1	0001101100 (1) 0001001100
17680	1	0001101100 (1) 0001111100
17681	1	0001101100 (1) 0001100100
17682	1	0001101100 (1) 0001101000
17683	1	0001101100 (1) 0001101101
17684	1	0000101101 (1) 1000101101
17686	1	0000101101 (1) 0001101101
17687	1	0000101101 (1) 0000001101
17688	1	0000101101 (1) 0000111101
17689	1	0000101101 (1) 0000100101
17690	1	0000101101 (1) 0000101100
17691	1	0000101100 (1) 1000101100
17693	1	0000101100 (1) 0001101100
17694	1	0000101100 (1) 0000001100
17695	1	0000101100 (1) 0000111100
17696	1	0000101100 (1) 0000100100
17697	1	0000101100 (1) 0000101000
17698	1	0000101100 (1) 0000101101
17699	1	1100101100 (1) 0100101100
17700	1	1100101100 (1) 1101101100
17701	1	1100101100 (1) 1100001100
17702	1	1100101100 (1) 1100111100
17703	1	1100101100 (1) 1100100100
17704	1	1100101100 (1) 1100101000
17705	1	1100101100 (1) 1100101101
17713	1	1001101100 (1) 0001101100
17714	1	1001101100 (1) 1101101100
17716	1	1001101100 (1) 1001001100
17717	1	1001101100 (1) 1001111100
17718	1	1001101100 (1) 1001100100
17719	1	1001101100 (1) 1001101000
17720	1	1001101100 (1) 1001101101
17721	1	1000101101 (1) 0000101101
17722	1	1000101101 (1) 1100101101
17724	1	1000101101 (1) 1001101101
17725	1	1000101101 (1) 1000001101
17726	1	1000101101 (1) 1000111101
17727	1	1000101101 (1) 1000100101
17728	1	1000101101 (1) 1000101100
17729	1	1000101100 (1) 0000101100
17730	1	1000101100 (1) 1100101100
17732	1	1000101100 (1) 1001101100
17733	1	1000101100 (1) 1000001100
17734	1	1000101100 (1) 1000111100
17735	1	1000101100 (1) 1000100100
17736	1	1000101100 (1) 1000101000
17737	1	1000101100 (1) 1000101101
17738	1	0100001011 (1) 1100001011
17739	1	0100001011 (1) 0000001011
17740	1	0100001011 (1) 0101001011
17741	1	0100001011 (1) 0100000011
17742	1	0100001011 (1) 0100001111
17743	1	0100001011 (1) 0100001010
17744	1	1100001011 (1) 0100001011
17745	1	1100001011 (1) 1101001011
17746	1	1100001011 (1) 1100000011
17747	1	1100001011 (1) 1100001111
17748	1	1100001011 (1) 1100001010
17749	1	1000001011 (1) 0000001011
17750	1	1000001011 (1) 1100001011
17751	1	1000001011 (1) 1001001011
17752	1	1000001011 (1) 1000000011
17753	1	1000001011 (1) 1000001111
17754	1	1000001011 (1) 1000001010
17755	1	0000001011 (1) 1000001011
17756	1	0000001011 (1) 0001001011
17757	1	0000001011 (1) 0000000011
17758	1	0000001011 (1) 0000001111
17759	1	0000001011 (1) 0000001010
17760	1	1101110101 (1) 0101110101
17761	1	1101110101 (1) 1001110101
17762	1	1101110101 (1) 1101111101
17763	1	1101110101 (1) 1101110100
17764	1	0101110101 (1) 1101110101
17765	1	0101110101 (1) 0001110101
17766	1	0101110101 (1) 0101111101
17767	1	0101110101 (1) 0101110100
17822	1	1101010011 (1) 0101010011
17823	1	1101010011 (1) 1001010011
17824	1	1101010011 (1) 1101110011
17825	1	1101010011 (1) 1101000011
17826	1	1101010011 (1) 1101010111
17827	1	1101010011 (1) 1101010010
17828	1	0101010011 (1) 1101010011
17829	1	0101010011 (1) 0001010011
17830	1	0101010011 (1) 0101110011
17831	1	0101010011 (1) 0101000011
17832	1	0101010011 (1) 0101010111
17833	1	0101010011 (1) 0101010010
17834	1	1001110101 (1) 0001110101
17836	1	1001110101 (1) 1001111101
17837	1	1001110101 (1) 1001110100
17838	1	0001110101 (1) 1001110101
17840	1	0001110101 (1) 0001111101
17841	1	0001110101 (1) 0001110100
17872	1	0001010011 (1) 1001010011
17873	1	0001010011 (1) 0001000011
17874	1	0001010011 (1) 0001010111
17875	1	0001010011 (1) 0001010010
17876	1	1001010011 (1) 0001010011
17877	1	1001010011 (1) 1001000011
17878	1	1001010011 (1) 1001010111
17879	1	1001010011 (1) 1001010010
17890	1	0101101100 (1) 1101101100
17891	1	0101101100 (1) 0001101100
17892	1	0101101100 (1) 0101111100
17893	1	0101101100 (1) 0101100100
17894	1	0101101100 (1) 0101101000
17895	1	0101101100 (1) 0101101101
17896	1	0101001110 (1) 1101001110
17897	1	0101001110 (1) 0001001110
17898	1	0101001110 (1) 0101101110
17899	1	0101001110 (1) 0101000110
17900	1	0101001110 (1) 0101001010
17901	1	0101001110 (1) 0101001111
17902	1	0101001101 (1) 1101001101
17903	1	0101001101 (1) 0001001101
17904	1	0101001101 (1) 0101101101
17905	1	0101001101 (1) 0101000101
17906	1	0101001101 (1) 0101001111
17907	1	0101001101 (1) 0101001100
17908	1	1101101100 (1) 0101101100
17909	1	1101101100 (1) 1101111100
17910	1	1101101100 (1) 1101100100
17911	1	1101101100 (1) 1101101000
17912	1	1101101100 (1) 1101101101
17913	1	1101001110 (1) 0101001110
17914	1	1101001110 (1) 1101101110
17915	1	1101001110 (1) 1101000110
17916	1	1101001110 (1) 1101001010
17917	1	1101001110 (1) 1101001111
17918	1	1101001101 (1) 0101001101
17919	1	1101001101 (1) 1101101101
17920	1	1101001101 (1) 1101000101
17921	1	1101001101 (1) 1101001111
17922	1	1101001101 (1) 1101001100
17930	1	1001001110 (1) 0001001110
17931	1	1001001110 (1) 1101001110
17933	1	1001001110 (1) 1001000110
17934	1	1001001110 (1) 1001001010
17935	1	1001001110 (1) 1001001111
17936	1	1001001101 (1) 0001001101
17937	1	1001001101 (1) 1101001101
17939	1	1001001101 (1) 1001000101
17940	1	1001001101 (1) 1001001111
17941	1	1001001101 (1) 1001001100
17968	1	0001001110 (1) 1001001110
17970	1	0001001110 (1) 0001000110
17971	1	0001001110 (1) 0001001010
17972	1	0001001110 (1) 0001001111
17973	1	0001001101 (1) 1001001101
17975	1	0001001101 (1) 0001000101
17976	1	0001001101 (1) 0001001111
17977	1	0001001101 (1) 0001001100
18060	1	1100110101 (1) 0100110101
18061	1	1100110101 (1) 1000110101
18062	1	1100110101 (1) 1101110101
18063	1	1100110101 (1) 1100111101
18064	1	1100110101 (1) 1100110100
18065	1	0100110101 (1) 1100110101
18066	1	0100110101 (1) 0000110101
18067	1	0100110101 (1) 0101110101
18068	1	0100110101 (1) 0100111101
18069	1	0100110101 (1) 0100110100
18099	1	1101110010 (1) 0101110010
18100	1	1101110010 (1) 1001110010
18101	1	1101110010 (1) 1101110000
18102	1	1101110010 (1) 1101110011
18103	1	1101100011 (1) 0101100011
18104	1	1101100011 (1) 1101110011
18105	1	1101100011 (1) 1101100111
18106	1	1101100011 (1) 1101100001
18107	1	1101100011 (1) 1101100010
18108	1	0101110010 (1) 1101110010
18109	1	0101110010 (1) 0001110010
18110	1	0101110010 (1) 0101110000
18111	1	0101110010 (1) 0101110011
18112	1	0101100011 (1) 1101100011
18113	1	0101100011 (1) 0001100011
18114	1	0101100011 (1) 0101110011
18115	1	0101100011 (1) 0101100111
18116	1	0101100011 (1) 0101100001
18117	1	0101100011 (1) 0101100010
18118	1	1100010011 (1) 0100010011
18119	1	1100010011 (1) 1000010011
18120	1	1100010011 (1) 1101010011
18121	1	1100010011 (1) 1100000011
18122	1	1100010011 (1) 1100010111
18123	1	1100010011 (1) 1100010010
18124	1	0000110101 (1) 1000110101
18126	1	0000110101 (1) 0001110101
18127	1	0000110101 (1) 0000111101
18128	1	0000110101 (1) 0000110100
18129	1	0100010011 (1) 1100010011
18130	1	0100010011 (1) 0000010011
18131	1	0100010011 (1) 0101010011
18132	1	0100010011 (1) 0100000011
18133	1	0100010011 (1) 0100010111
18134	1	0100010011 (1) 0100010010
18153	1	1000110101 (1) 0000110101
18155	1	1000110101 (1) 1001110101
18156	1	1000110101 (1) 1000111101
18157	1	1000110101 (1) 1000110100
18165	1	1001110010 (1) 0001110010
18167	1	1001110010 (1) 1001010010
18168	1	1001110010 (1) 1001110000
18169	1	1001110010 (1) 1001110011
18170	1	1001100011 (1) 0001100011
18171	1	1001100011 (1) 1101100011
18173	1	1001100011 (1) 1001000011
18174	1	1001100011 (1) 1001110011
18175	1	1001100011 (1) 1001100111
18176	1	1001100011 (1) 1001100001
18177	1	1001100011 (1) 1001100010
18208	1	0001110010 (1) 1001110010
18210	1	0001110010 (1) 0001010010
18211	1	0001110010 (1) 0001110000
18212	1	0001110010 (1) 0001110011
18213	1	0001100011 (1) 1001100011
18215	1	0001100011 (1) 0001000011
18216	1	0001100011 (1) 0001110011
18217	1	0001100011 (1) 0001100111
18218	1	0001100011 (1) 0001100001
18219	1	0001100011 (1) 0001100010
18220	1	1000010011 (1) 0000010011
18221	1	1000010011 (1) 1001010011
18222	1	1000010011 (1) 1000000011
18223	1	1000010011 (1) 1000010111
18224	1	1000010011 (1) 1000010010
18225	1	0000010011 (1) 1000010011
18226	1	0000010011 (1) 0001010011
18227	1	0000010011 (1) 0000000011
18228	1	0000010011 (1) 0000010111
18229	1	0000010011 (1) 0000010010
18310	1	0101111100 (1) 1101111100
18311	1	0101111100 (1) 0001111100
18312	1	0101111100 (1) 0101111101
18313	1	0101111001 (1) 1101111001
18314	1	0101111001 (1) 0001111001
18315	1	0101111001 (1) 0101111101
18316	1	0101111001 (1) 0101111000
18317	1	1101111100 (1) 0101111100
18318	1	1101111100 (1) 1001111100
18319	1	1101111100 (1) 1101111101
18320	1	1101111001 (1) 0101111001
18321	1	1101111001 (1) 1001111001
18322	1	1101111001 (1) 1101111101
18323	1	1101111001 (1) 1101111000
18324	1	0101001100 (1) 1101001100
18325	1	0101001100 (1) 0001001100
18326	1	0101001100 (1) 0101101100
18327	1	0101001100 (1) 0101000100
18328	1	0101001100 (1) 0101001000
18329	1	0101001100 (1) 0101001110
18330	1	0101001100 (1) 0101001101
18331	1	0100001110 (1) 1100001110
18332	1	0100001110 (1) 0000001110
18333	1	0100001110 (1) 0101001110
18334	1	0100001110 (1) 0100000110
18335	1	0100001110 (1) 0100001010
18336	1	0100001110 (1) 0100001111
18337	1	0100001101 (1) 1100001101
18338	1	0100001101 (1) 0000001101
18339	1	0100001101 (1) 0101001101
18340	1	0100001101 (1) 0100000101
18341	1	0100001101 (1) 0100001111
18342	1	0100001101 (1) 0100001100
18343	1	0100001100 (1) 1100001100
18344	1	0100001100 (1) 0000001100
18345	1	0100001100 (1) 0101001100
18346	1	0100001100 (1) 0100000100
18347	1	0100001100 (1) 0100001000
18348	1	0100001100 (1) 0100001110
18349	1	0100001100 (1) 0100001101
18350	1	1101001100 (1) 0101001100
18351	1	1101001100 (1) 1101101100
18352	1	1101001100 (1) 1101000100
18353	1	1101001100 (1) 1101001000
18354	1	1101001100 (1) 1101001110
18355	1	1101001100 (1) 1101001101
18356	1	1100001110 (1) 0100001110
18357	1	1100001110 (1) 1101001110
18358	1	1100001110 (1) 1100000110
18359	1	1100001110 (1) 1100001010
18360	1	1100001110 (1) 1100001111
18361	1	1100001101 (1) 0100001101
18362	1	1100001101 (1) 1101001101
18363	1	1100001101 (1) 1100000101
18364	1	1100001101 (1) 1100001111
18365	1	1100001101 (1) 1100001100
18366	1	1001111100 (1) 0001111100
18368	1	1001111100 (1) 1001011100
18369	1	1001111100 (1) 1001111101
18370	1	1001111001 (1) 0001111001
18372	1	1001111001 (1) 1001011001
18373	1	1001111001 (1) 1001111101
18374	1	1001111001 (1) 1001111000
18375	1	0001111100 (1) 1001111100
18377	1	0001111100 (1) 0001011100
18378	1	0001111100 (1) 0001111101
18379	1	0001111001 (1) 1001111001
18381	1	0001111001 (1) 0001011001
18382	1	0001111001 (1) 0001111101
18383	1	0001111001 (1) 0001111000
18418	1	1100001100 (1) 0100001100
18419	1	1100001100 (1) 1101001100
18420	1	1100001100 (1) 1100000100
18421	1	1100001100 (1) 1100001000
18422	1	1100001100 (1) 1100001110
18423	1	1100001100 (1) 1100001101
18430	1	1001001100 (1) 0001001100
18431	1	1001001100 (1) 1101001100
18433	1	1001001100 (1) 1001000100
18434	1	1001001100 (1) 1001001000
18435	1	1001001100 (1) 1001001110
18436	1	1001001100 (1) 1001001101
18437	1	1000001110 (1) 0000001110
18438	1	1000001110 (1) 1100001110
18440	1	1000001110 (1) 1001001110
18441	1	1000001110 (1) 1000000110
18442	1	1000001110 (1) 1000001010
18443	1	1000001110 (1) 1000001111
18444	1	1000001101 (1) 0000001101
18445	1	1000001101 (1) 1100001101
18447	1	1000001101 (1) 1001001101
18448	1	1000001101 (1) 1000000101
18449	1	1000001101 (1) 1000001111
18450	1	1000001101 (1) 1000001100
18451	1	1000001100 (1) 0000001100
18452	1	1000001100 (1) 1100001100
18454	1	1000001100 (1) 1001001100
18455	1	1000001100 (1) 1000000100
18456	1	1000001100 (1) 1000001000
18457	1	1000001100 (1) 1000001110
18458	1	1000001100 (1) 1000001101
18464	1	0001001100 (1) 1001001100
18466	1	0001001100 (1) 0001000100
18467	1	0001001100 (1) 0001001000
18468	1	0001001100 (1) 0001001110
18469	1	0001001100 (1) 0001001101
18470	1	0000001110 (1) 1000001110
18472	1	0000001110 (1) 0001001110
18473	1	0000001110 (1) 0000000110
18474	1	0000001110 (1) 0000001010
18475	1	0000001110 (1) 0000001111
18476	1	0000001101 (1) 1000001101
18478	1	0000001101 (1) 0001001101
18479	1	0000001101 (1) 0000000101
18480	1	0000001101 (1) 0000001111
18481	1	0000001101 (1) 0000001100
18482	1	0000001100 (1) 1000001100
18484	1	0000001100 (1) 0001001100
18485	1	0000001100 (1) 0000000100
18486	1	0000001100 (1) 0000001000
18487	1	0000001100 (1) 0000001110
18488	1	0000001100 (1) 0000001101
18489	1	1101010110 (1) 0101010110
18490	1	1101010110 (1) 1001010110
18491	1	1101010110 (1) 1101110110
18492	1	1101010110 (1) 1101000110
18493	1	1101010110 (1) 1101010010
18494	1	1101010110 (1) 1101010111
18495	1	1101010101 (1) 0101010101
18496	1	1101010101 (1) 1001010101
18497	1	1101010101 (1) 1101110101
18498	1	1101010101 (1) 1101000101
18499	1	1101010101 (1) 1101011101
18500	1	1101010101 (1) 1101010111
18501	1	1101010101 (1) 1101010100
18502	1	0101010110 (1) 1101010110
18503	1	0101010110 (1) 0001010110
18504	1	0101010110 (1) 0101110110
18505	1	0101010110 (1) 0101000110
18506	1	0101010110 (1) 0101010010
18507	1	0101010110 (1) 0101010111
18508	1	0101010101 (1) 1101010101
18509	1	0101010101 (1) 0001010101
18510	1	0101010101 (1) 0101110101
18511	1	0101010101 (1) 0101000101
18512	1	0101010101 (1) 0101011101
18513	1	0101010101 (1) 0101010111
18514	1	0101010101 (1) 0101010100
18550	1	0001010110 (1) 1001010110
18552	1	0001010110 (1) 0001110110
18553	1	0001010110 (1) 0001000110
18554	1	0001010110 (1) 0001010010
18555	1	0001010110 (1) 0001010111
18556	1	0001010101 (1) 1001010101
18558	1	0001010101 (1) 0001110101
18559	1	0001010101 (1) 0001000101
18560	1	0001010101 (1) 0001011101
18561	1	0001010101 (1) 0001010111
18562	1	0001010101 (1) 0001010100
18571	1	1001010110 (1) 0001010110
18573	1	1001010110 (1) 1001110110
18574	1	1001010110 (1) 1001000110
18575	1	1001010110 (1) 1001010010
18576	1	1001010110 (1) 1001010111
18577	1	1001010101 (1) 0001010101
18579	1	1001010101 (1) 1001110101
18580	1	1001010101 (1) 1001000101
18581	1	1001010101 (1) 1001011101
18582	1	1001010101 (1) 1001010111
18583	1	1001010101 (1) 1001010100
18606	1	0100110010 (1) 1100110010
18607	1	0100110010 (1) 0000110010
18608	1	0100110010 (1) 0101110010
18609	1	0100110010 (1) 0100010010
18610	1	0100110010 (1) 0100110000
18611	1	0100110010 (1) 0100110011
18612	1	0100100011 (1) 1100100011
18613	1	0100100011 (1) 0000100011
18614	1	0100100011 (1) 0101100011
18615	1	0100100011 (1) 0100000011
18616	1	0100100011 (1) 0100110011
18617	1	0100100011 (1) 0100100111
18618	1	0100100011 (1) 0100100001
18619	1	0100100011 (1) 0100100010
18620	1	0100100010 (1) 1100100010
18621	1	0100100010 (1) 0000100010
18622	1	0100100010 (1) 0101100010
18623	1	0100100010 (1) 0100000010
18624	1	0100100010 (1) 0100110010
18625	1	0100100010 (1) 0100100000
18626	1	0100100010 (1) 0100100011
18627	1	1100110010 (1) 0100110010
18628	1	1100110010 (1) 1000110010
18629	1	1100110010 (1) 1101110010
18630	1	1100110010 (1) 1100010010
18631	1	1100110010 (1) 1100110000
18632	1	1100110010 (1) 1100110011
18633	1	1100100011 (1) 0100100011
18634	1	1100100011 (1) 1101100011
18635	1	1100100011 (1) 1100000011
18636	1	1100100011 (1) 1100110011
18637	1	1100100011 (1) 1100100111
18638	1	1100100011 (1) 1100100001
18639	1	1100100011 (1) 1100100010
18654	1	1100100010 (1) 0100100010
18655	1	1100100010 (1) 1101100010
18656	1	1100100010 (1) 1100000010
18657	1	1100100010 (1) 1100110010
18658	1	1100100010 (1) 1100100000
18659	1	1100100010 (1) 1100100011
18666	1	1001100010 (1) 0001100010
18667	1	1001100010 (1) 1101100010
18669	1	1001100010 (1) 1001000010
18670	1	1001100010 (1) 1001110010
18671	1	1001100010 (1) 1001100000
18672	1	1001100010 (1) 1001100011
18673	1	1000110010 (1) 0000110010
18675	1	1000110010 (1) 1001110010
18676	1	1000110010 (1) 1000010010
18677	1	1000110010 (1) 1000110000
18678	1	1000110010 (1) 1000110011
18679	1	1000100011 (1) 0000100011
18680	1	1000100011 (1) 1100100011
18682	1	1000100011 (1) 1001100011
18683	1	1000100011 (1) 1000000011
18684	1	1000100011 (1) 1000110011
18685	1	1000100011 (1) 1000100111
18686	1	1000100011 (1) 1000100001
18687	1	1000100011 (1) 1000100010
18688	1	1000100010 (1) 0000100010
18689	1	1000100010 (1) 1100100010
18691	1	1000100010 (1) 1001100010
18692	1	1000100010 (1) 1000000010
18693	1	1000100010 (1) 1000110010
18694	1	1000100010 (1) 1000100000
18695	1	1000100010 (1) 1000100011
18701	1	0001100010 (1) 1001100010
18703	1	0001100010 (1) 0001000010
18704	1	0001100010 (1) 0001110010
18705	1	0001100010 (1) 0001100000
18706	1	0001100010 (1) 0001100011
18707	1	0000110010 (1) 1000110010
18709	1	0000110010 (1) 0001110010
18710	1	0000110010 (1) 0000010010
18711	1	0000110010 (1) 0000110000
18712	1	0000110010 (1) 0000110011
18713	1	0000100011 (1) 1000100011
18715	1	0000100011 (1) 0001100011
18716	1	0000100011 (1) 0000000011
18717	1	0000100011 (1) 0000110011
18718	1	0000100011 (1) 0000100111
18719	1	0000100011 (1) 0000100001
18720	1	0000100011 (1) 0000100010
18721	1	0000100010 (1) 1000100010
18723	1	0000100010 (1) 0001100010
18724	1	0000100010 (1) 0000000010
18725	1	0000100010 (1) 0000110010
18726	1	0000100010 (1) 0000100000
18727	1	0000100010 (1) 0000100011
18837	1	1100111100 (1) 0100111100
18838	1	1100111100 (1) 1000111100
18839	1	1100111100 (1) 1101111100
18840	1	1100111100 (1) 1100011100
18841	1	1100111100 (1) 1100111101
18842	1	1100111001 (1) 0100111001
18843	1	1100111001 (1) 1000111001
18844	1	1100111001 (1) 1101111001
18845	1	1100111001 (1) 1100011001
18846	1	1100111001 (1) 1100111101
18847	1	1100111001 (1) 1100111000
18867	1	0100111100 (1) 1100111100
18868	1	0100111100 (1) 0000111100
18869	1	0100111100 (1) 0101111100
18870	1	0100111100 (1) 0100011100
18871	1	0100111100 (1) 0100111101
18872	1	0100111001 (1) 1100111001
18873	1	0100111001 (1) 0000111001
18874	1	0100111001 (1) 0101111001
18875	1	0100111001 (1) 0100011001
18876	1	0100111001 (1) 0100111101
18877	1	0100111001 (1) 0100111000
18890	1	0000111100 (1) 1000111100
18892	1	0000111100 (1) 0001111100
18893	1	0000111100 (1) 0000011100
18894	1	0000111100 (1) 0000111101
18895	1	0000111001 (1) 1000111001
18897	1	0000111001 (1) 0001111001
18898	1	0000111001 (1) 0000011001
18899	1	0000111001 (1) 0000111101
18900	1	0000111001 (1) 0000111000
18907	1	1000111100 (1) 0000111100
18909	1	1000111100 (1) 1001111100
18910	1	1000111100 (1) 1000011100
18911	1	1000111100 (1) 1000111101
18912	1	1000111001 (1) 0000111001
18914	1	1000111001 (1) 1001111001
18915	1	1000111001 (1) 1000011001
18916	1	1000111001 (1) 1000111101
18917	1	1000111001 (1) 1000111000
18975	1	1101010100 (1) 0101010100
18976	1	1101010100 (1) 1001010100
18977	1	1101010100 (1) 1101110100
18978	1	1101010100 (1) 1101000100
18979	1	1101010100 (1) 1101011100
18980	1	1101010100 (1) 1101010000
18981	1	1101010100 (1) 1101010110
18982	1	1101010100 (1) 1101010101
18983	1	1100010110 (1) 0100010110
18984	1	1100010110 (1) 1000010110
18985	1	1100010110 (1) 1101010110
18986	1	1100010110 (1) 1100110110
18987	1	1100010110 (1) 1100000110
18988	1	1100010110 (1) 1100010010
18989	1	1100010110 (1) 1100010111
18990	1	1100010101 (1) 0100010101
18991	1	1100010101 (1) 1000010101
18992	1	1100010101 (1) 1101010101
18993	1	1100010101 (1) 1100110101
18994	1	1100010101 (1) 1100000101
18995	1	1100010101 (1) 1100011101
18996	1	1100010101 (1) 1100010111
18997	1	1100010101 (1) 1100010100
18998	1	1100010100 (1) 0100010100
18999	1	1100010100 (1) 1000010100
19000	1	1100010100 (1) 1101010100
19001	1	1100010100 (1) 1100110100
19002	1	1100010100 (1) 1100000100
19003	1	1100010100 (1) 1100011100
19004	1	1100010100 (1) 1100010000
19005	1	1100010100 (1) 1100010110
19006	1	1100010100 (1) 1100010101
19007	1	0101010100 (1) 1101010100
19008	1	0101010100 (1) 0001010100
19009	1	0101010100 (1) 0101110100
19010	1	0101010100 (1) 0101000100
19011	1	0101010100 (1) 0101011100
19012	1	0101010100 (1) 0101010000
19013	1	0101010100 (1) 0101010110
19014	1	0101010100 (1) 0101010101
19015	1	0100010110 (1) 1100010110
19016	1	0100010110 (1) 0000010110
19017	1	0100010110 (1) 0101010110
19018	1	0100010110 (1) 0100110110
19019	1	0100010110 (1) 0100000110
19020	1	0100010110 (1) 0100010010
19021	1	0100010110 (1) 0100010111
19022	1	0100010101 (1) 1100010101
19023	1	0100010101 (1) 0000010101
19024	1	0100010101 (1) 0101010101
19025	1	0100010101 (1) 0100110101
19026	1	0100010101 (1) 0100000101
19027	1	0100010101 (1) 0100011101
19028	1	0100010101 (1) 0100010111
19029	1	0100010101 (1) 0100010100
19030	1	0100010100 (1) 1100010100
19031	1	0100010100 (1) 0000010100
19032	1	0100010100 (1) 0101010100
19033	1	0100010100 (1) 0100110100
19034	1	0100010100 (1) 0100000100
19035	1	0100010100 (1) 0100011100
19036	1	0100010100 (1) 0100010000
19037	1	0100010100 (1) 0100010110
19038	1	0100010100 (1) 0100010101
19039	1	0101110100 (1) 1101110100
19040	1	0101110100 (1) 0001110100
19041	1	0101110100 (1) 0101111100
19042	1	0101110100 (1) 0101110000
19043	1	0101110100 (1) 0101110101
19044	1	0101100101 (1) 1101100101
19045	1	0101100101 (1) 0001100101
19046	1	0101100101 (1) 0101110101
19047	1	0101100101 (1) 0101100100
19048	1	1101110100 (1) 0101110100
19049	1	1101110100 (1) 1001110100
19050	1	1101110100 (1) 1101111100
19051	1	1101110100 (1) 1101110000
19052	1	1101110100 (1) 1101110101
19053	1	1101100101 (1) 0101100101
19054	1	1101100101 (1) 1101110101
19055	1	1101100101 (1) 1101100100
19063	1	1001010100 (1) 0001010100
19065	1	1001010100 (1) 1001110100
19066	1	1001010100 (1) 1001000100
19067	1	1001010100 (1) 1001011100
19068	1	1001010100 (1) 1001010000
19069	1	1001010100 (1) 1001010110
19070	1	1001010100 (1) 1001010101
19071	1	1000010110 (1) 0000010110
19073	1	1000010110 (1) 1001010110
19074	1	1000010110 (1) 1000110110
19075	1	1000010110 (1) 1000000110
19076	1	1000010110 (1) 1000010010
19077	1	1000010110 (1) 1000010111
19078	1	1000010101 (1) 0000010101
19080	1	1000010101 (1) 1001010101
19081	1	1000010101 (1) 1000110101
19082	1	1000010101 (1) 1000000101
19083	1	1000010101 (1) 1000011101
19084	1	1000010101 (1) 1000010111
19085	1	1000010101 (1) 1000010100
19124	1	1000010100 (1) 0000010100
19126	1	1000010100 (1) 1001010100
19127	1	1000010100 (1) 1000110100
19128	1	1000010100 (1) 1000000100
19129	1	1000010100 (1) 1000011100
19130	1	1000010100 (1) 1000010000
19131	1	1000010100 (1) 1000010110
19132	1	1000010100 (1) 1000010101
19140	1	0001010100 (1) 1001010100
19142	1	0001010100 (1) 0001110100
19143	1	0001010100 (1) 0001000100
19144	1	0001010100 (1) 0001011100
19145	1	0001010100 (1) 0001010000
19146	1	0001010100 (1) 0001010110
19147	1	0001010100 (1) 0001010101
19148	1	0000010110 (1) 1000010110
19150	1	0000010110 (1) 0001010110
19151	1	0000010110 (1) 0000110110
19152	1	0000010110 (1) 0000000110
19153	1	0000010110 (1) 0000010010
19154	1	0000010110 (1) 0000010111
19155	1	0000010101 (1) 1000010101
19157	1	0000010101 (1) 0001010101
19158	1	0000010101 (1) 0000110101
19159	1	0000010101 (1) 0000000101
19160	1	0000010101 (1) 0000011101
19161	1	0000010101 (1) 0000010111
19162	1	0000010101 (1) 0000010100
19163	1	0000010100 (1) 1000010100
19165	1	0000010100 (1) 0001010100
19166	1	0000010100 (1) 0000110100
19167	1	0000010100 (1) 0000000100
19168	1	0000010100 (1) 0000011100
19169	1	0000010100 (1) 0000010000
19170	1	0000010100 (1) 0000010110
19171	1	0000010100 (1) 0000010101
19172	1	0101100010 (1) 1101100010
19173	1	0101100010 (1) 0001100010
19174	1	0101100010 (1) 0101110010
19175	1	0101100010 (1) 0101100000
19176	1	0101100010 (1) 0101100011
19177	1	0101000011 (1) 1101000011
19178	1	0101000011 (1) 0001000011
19179	1	0101000011 (1) 0101100011
19180	1	0101000011 (1) 0101000111
19181	1	0101000011 (1) 0101000010
19182	1	1001110100 (1) 0001110100
19184	1	1001110100 (1) 1001111100
19185	1	1001110100 (1) 1001110000
19186	1	1001110100 (1) 1001110101
19187	1	1001100101 (1) 0001100101
19188	1	1001100101 (1) 1101100101
19190	1	1001100101 (1) 1001110101
19191	1	1001100101 (1) 1001100100
19192	1	1101100010 (1) 0101100010
19193	1	1101100010 (1) 1101110010
19194	1	1101100010 (1) 1101100000
19195	1	1101100010 (1) 1101100011
19196	1	1101000011 (1) 0101000011
19197	1	1101000011 (1) 1101100011
19198	1	1101000011 (1) 1101000111
19199	1	1101000011 (1) 1101000010
19200	1	0001110100 (1) 1001110100
19202	1	0001110100 (1) 0001111100
19203	1	0001110100 (1) 0001110000
19204	1	0001110100 (1) 0001110101
19205	1	0001100101 (1) 1001100101
19207	1	0001100101 (1) 0001110101
19208	1	0001100101 (1) 0001100100
19209	1	1001000011 (1) 0001000011
19210	1	1001000011 (1) 1101000011
19211	1	1001000011 (1) 1001000111
19212	1	1001000011 (1) 1001000010
19213	1	0001000011 (1) 1001000011
19214	1	0001000011 (1) 0001000111
19215	1	0001000011 (1) 0001000010
19216	1	1101011100 (1) 0101011100
19217	1	1101011100 (1) 1001011100
19218	1	1101011100 (1) 1101111100
19219	1	1101011100 (1) 1101001100
19220	1	1101011100 (1) 1101011110
19221	1	1101011100 (1) 1101011101
19222	1	1101011010 (1) 0101011010
19223	1	1101011010 (1) 1001011010
19224	1	1101011010 (1) 1101111010
19225	1	1101011010 (1) 1101001010
19226	1	1101011010 (1) 1101010010
19227	1	1101011010 (1) 1101011110
19228	1	1101011010 (1) 1101011011
19229	1	1101011001 (1) 0101011001
19230	1	1101011001 (1) 1001011001
19231	1	1101011001 (1) 1101111001
19232	1	1101011001 (1) 1101001001
19233	1	1101011001 (1) 1101011101
19234	1	1101011001 (1) 1101011011
19235	1	1101011001 (1) 1101011000
19236	1	0101011100 (1) 1101011100
19237	1	0101011100 (1) 0001011100
19238	1	0101011100 (1) 0101111100
19239	1	0101011100 (1) 0101001100
19240	1	0101011100 (1) 0101011110
19241	1	0101011100 (1) 0101011101
19242	1	0101011010 (1) 1101011010
19243	1	0101011010 (1) 0001011010
19244	1	0101011010 (1) 0101111010
19245	1	0101011010 (1) 0101001010
19246	1	0101011010 (1) 0101010010
19247	1	0101011010 (1) 0101011110
19248	1	0101011010 (1) 0101011011
19249	1	0101011001 (1) 1101011001
19250	1	0101011001 (1) 0001011001
19251	1	0101011001 (1) 0101111001
19252	1	0101011001 (1) 0101001001
19253	1	0101011001 (1) 0101011101
19254	1	0101011001 (1) 0101011011
19255	1	0101011001 (1) 0101011000
19256	1	1001011100 (1) 0001011100
19258	1	1001011100 (1) 1001001100
19259	1	1001011100 (1) 1001011110
19260	1	1001011100 (1) 1001011101
19261	1	1001011010 (1) 0001011010
19262	1	1001011010 (1) 1001001010
19263	1	1001011010 (1) 1001010010
19264	1	1001011010 (1) 1001011110
19265	1	1001011010 (1) 1001011011
19266	1	1001011001 (1) 0001011001
19267	1	1001011001 (1) 1001001001
19268	1	1001011001 (1) 1001011101
19269	1	1001011001 (1) 1001011011
19270	1	1001011001 (1) 1001011000
19271	1	0001011100 (1) 1001011100
19273	1	0001011100 (1) 0001001100
19274	1	0001011100 (1) 0001011110
19275	1	0001011100 (1) 0001011101
19276	1	0001011010 (1) 1001011010
19277	1	0001011010 (1) 0001001010
19278	1	0001011010 (1) 0001010010
19279	1	0001011010 (1) 0001011110
19280	1	0001011010 (1) 0001011011
19281	1	0001011001 (1) 1001011001
19282	1	0001011001 (1) 0001001001
19283	1	0001011001 (1) 0001011101
19284	1	0001011001 (1) 0001011011
19285	1	0001011001 (1) 0001011000
19375	1	1100110100 (1) 0100110100
19376	1	1100110100 (1) 1000110100
19377	1	1100110100 (1) 1101110100
19378	1	1100110100 (1) 1100111100
19379	1	1100110100 (1) 1100110000
19380	1	1100110100 (1) 1100110101
19381	1	1100100101 (1) 0100100101
19382	1	1100100101 (1) 1101100101
19383	1	1100100101 (1) 1100110101
19384	1	1100100101 (1) 1100100100
19405	1	0100110100 (1) 1100110100
19406	1	0100110100 (1) 0000110100
19407	1	0100110100 (1) 0101110100
19408	1	0100110100 (1) 0100111100
19409	1	0100110100 (1) 0100110000
19410	1	0100110100 (1) 0100110101
19411	1	0100100101 (1) 1100100101
19412	1	0100100101 (1) 0000100101
19413	1	0100100101 (1) 0101100101
19414	1	0100100101 (1) 0100110101
19415	1	0100100101 (1) 0100100100
19463	1	0000110100 (1) 1000110100
19465	1	0000110100 (1) 0001110100
19466	1	0000110100 (1) 0000111100
19467	1	0000110100 (1) 0000110000
19468	1	0000110100 (1) 0000110101
19469	1	0000100101 (1) 1000100101
19471	1	0000100101 (1) 0001100101
19472	1	0000100101 (1) 0000110101
19473	1	0000100101 (1) 0000100100
19474	1	0100000011 (1) 1100000011
19475	1	0100000011 (1) 0000000011
19476	1	0100000011 (1) 0101000011
19477	1	0100000011 (1) 0100000111
19478	1	0100000011 (1) 0100000010
19479	1	1100000011 (1) 0100000011
19480	1	1100000011 (1) 1101000011
19481	1	1100000011 (1) 1100000111
19482	1	1100000011 (1) 1100000010
19483	1	1000110100 (1) 0000110100
15388	1	1101111111 (1) 0101111111
15389	1	1101111111 (1) 1001111111
19485	1	1000110100 (1) 1001110100
15390	1	1101111111 (1) 1101110111
19486	1	1000110100 (1) 1000111100
15391	1	1101111111 (1) 1101111101
19487	1	1000110100 (1) 1000110000
15392	1	1101111111 (1) 1101111110
19488	1	1000110100 (1) 1000110101
15393	1	0101111111 (1) 1101111111
19489	1	1000100101 (1) 0000100101
15394	1	0101111111 (1) 0001111111
19490	1	1000100101 (1) 1100100101
15395	1	0101111111 (1) 0101110111
15396	1	0101111111 (1) 0101111101
19492	1	1000100101 (1) 1001100101
15397	1	0101111111 (1) 0101111110
19493	1	1000100101 (1) 1000110101
15398	1	1001111111 (1) 0001111111
19494	1	1000100101 (1) 1000100100
19495	1	1000000011 (1) 0000000011
15400	1	1001111111 (1) 1001011111
19496	1	1000000011 (1) 1100000011
15401	1	1001111111 (1) 1001110111
19497	1	1000000011 (1) 1001000011
15402	1	1001111111 (1) 1001111101
19498	1	1000000011 (1) 1000000111
15403	1	1001111111 (1) 1001111110
19499	1	1000000011 (1) 1000000010
15404	1	0001111111 (1) 1001111111
19500	1	0000000011 (1) 1000000011
19501	1	0000000011 (1) 0001000011
15406	1	0001111111 (1) 0001011111
19502	1	0000000011 (1) 0000000111
15407	1	0001111111 (1) 0001110111
19503	1	0000000011 (1) 0000000010
15408	1	0001111111 (1) 0001111101
15409	1	0001111111 (1) 0001111110
15434	1	1100111111 (1) 0100111111
15435	1	1100111111 (1) 1000111111
15436	1	1100111111 (1) 1101111111
15437	1	1100111111 (1) 1100011111
15438	1	1100111111 (1) 1100110111
15439	1	1100111111 (1) 1100111101
15440	1	1100111111 (1) 1100111110
15441	1	0100111111 (1) 1100111111
15442	1	0100111111 (1) 0000111111
15443	1	0100111111 (1) 0101111111
15444	1	0100111111 (1) 0100011111
15445	1	0100111111 (1) 0100110111
15446	1	0100111111 (1) 0100111101
15447	1	0100111111 (1) 0100111110
15448	1	0000111111 (1) 1000111111
15450	1	0000111111 (1) 0001111111
15451	1	0000111111 (1) 0000011111
15452	1	0000111111 (1) 0000110111
15453	1	0000111111 (1) 0000111101
15454	1	0000111111 (1) 0000111110
15455	1	1000111111 (1) 0000111111
19551	1	1100011100 (1) 0100011100
19552	1	1100011100 (1) 1000011100
15457	1	1000111111 (1) 1001111111
19553	1	1100011100 (1) 1101011100
15458	1	1000111111 (1) 1000011111
19554	1	1100011100 (1) 1100001100
15459	1	1000111111 (1) 1000110111
19555	1	1100011100 (1) 1100011110
15460	1	1000111111 (1) 1000111101
19556	1	1100011100 (1) 1100011101
15461	1	1000111111 (1) 1000111110
19557	1	1100011010 (1) 0100011010
19558	1	1100011010 (1) 1000011010
19559	1	1100011010 (1) 1101011010
19560	1	1100011010 (1) 1100001010
19561	1	1100011010 (1) 1100010010
19562	1	1100011010 (1) 1100011110
19563	1	1100011010 (1) 1100011011
19564	1	1100011001 (1) 0100011001
19565	1	1100011001 (1) 1000011001
19566	1	1100011001 (1) 1101011001
19567	1	1100011001 (1) 1100001001
19568	1	1100011001 (1) 1100011101
19569	1	1100011001 (1) 1100011011
19570	1	1100011001 (1) 1100011000
19571	1	0100011100 (1) 1100011100
19572	1	0100011100 (1) 0000011100
19573	1	0100011100 (1) 0101011100
19574	1	0100011100 (1) 0100001100
19575	1	0100011100 (1) 0100011110
19576	1	0100011100 (1) 0100011101
19577	1	0100011010 (1) 1100011010
19578	1	0100011010 (1) 0000011010
19579	1	0100011010 (1) 0101011010
19580	1	0100011010 (1) 0100001010
19581	1	0100011010 (1) 0100010010
19582	1	0100011010 (1) 0100011110
19583	1	0100011010 (1) 0100011011
15488	1	0101011111 (1) 1101011111
19584	1	0100011001 (1) 1100011001
15489	1	0101011111 (1) 0001011111
19585	1	0100011001 (1) 0000011001
15490	1	0101011111 (1) 0101111111
19586	1	0100011001 (1) 0101011001
15491	1	0101011111 (1) 0101001111
19587	1	0100011001 (1) 0100001001
15492	1	0101011111 (1) 0101010111
19588	1	0100011001 (1) 0100011101
15493	1	0101011111 (1) 0101011110
19589	1	0100011001 (1) 0100011011
15494	1	1101011111 (1) 0101011111
19590	1	0100011001 (1) 0100011000
15495	1	1101011111 (1) 1001011111
15496	1	1101011111 (1) 1101111111
15497	1	1101011111 (1) 1101001111
15498	1	1101011111 (1) 1101010111
15499	1	1101011111 (1) 1101011110
15500	1	1001011111 (1) 0001011111
15502	1	1001011111 (1) 1001001111
15503	1	1001011111 (1) 1001010111
15504	1	1001011111 (1) 1001011110
15505	1	0001011111 (1) 1001011111
15507	1	0001011111 (1) 0001001111
15508	1	0001011111 (1) 0001010111
15509	1	0001011111 (1) 0001011110
19616	1	0101101001 (1) 1101101001
19617	1	0101101001 (1) 0001101001
19618	1	0101101001 (1) 0101111001
19619	1	0101101001 (1) 0101100001
19620	1	0101101001 (1) 0101101101
19621	1	0101101001 (1) 0101101000
19622	1	1101101001 (1) 0101101001
19623	1	1101101001 (1) 1101111001
19624	1	1101101001 (1) 1101100001
19625	1	1101101001 (1) 1101101101
19626	1	1101101001 (1) 1101101000
19642	1	1000011100 (1) 0000011100
19644	1	1000011100 (1) 1001011100
19645	1	1000011100 (1) 1000001100
19646	1	1000011100 (1) 1000011110
19647	1	1000011100 (1) 1000011101
19648	1	1000011010 (1) 0000011010
19649	1	1000011010 (1) 1001011010
19650	1	1000011010 (1) 1000001010
19651	1	1000011010 (1) 1000010010
19652	1	1000011010 (1) 1000011110
19653	1	1000011010 (1) 1000011011
19654	1	1000011001 (1) 0000011001
19655	1	1000011001 (1) 1001011001
15560	1	0101101111 (1) 1101101111
19656	1	1000011001 (1) 1000001001
15561	1	0101101111 (1) 0001101111
19657	1	1000011001 (1) 1000011101
15562	1	0101101111 (1) 0101111111
19658	1	1000011001 (1) 1000011011
15563	1	0101101111 (1) 0101100111
19659	1	1000011001 (1) 1000011000
15564	1	0101101111 (1) 0101101101
19660	1	0000011100 (1) 1000011100
15565	1	0101101111 (1) 0101101110
15566	1	1101101111 (1) 0101101111
19662	1	0000011100 (1) 0001011100
15567	1	1101101111 (1) 1101111111
19663	1	0000011100 (1) 0000001100
15568	1	1101101111 (1) 1101100111
19664	1	0000011100 (1) 0000011110
15569	1	1101101111 (1) 1101101101
19665	1	0000011100 (1) 0000011101
15570	1	1101101111 (1) 1101101110
19666	1	0000011010 (1) 1000011010
15571	1	1100011111 (1) 0100011111
19667	1	0000011010 (1) 0001011010
15572	1	1100011111 (1) 1000011111
19668	1	0000011010 (1) 0000001010
15573	1	1100011111 (1) 1101011111
19669	1	0000011010 (1) 0000010010
15574	1	1100011111 (1) 1100001111
19670	1	0000011010 (1) 0000011110
15575	1	1100011111 (1) 1100010111
19671	1	0000011010 (1) 0000011011
15576	1	1100011111 (1) 1100011110
19672	1	0000011001 (1) 1000011001
15577	1	0100011111 (1) 1100011111
19673	1	0000011001 (1) 0001011001
15578	1	0100011111 (1) 0000011111
19674	1	0000011001 (1) 0000001001
15579	1	0100011111 (1) 0101011111
19675	1	0000011001 (1) 0000011101
15580	1	0100011111 (1) 0100001111
19676	1	0000011001 (1) 0000011011
15581	1	0100011111 (1) 0100010111
19677	1	0000011001 (1) 0000011000
15582	1	0100011111 (1) 0100011110
19685	1	1001101001 (1) 0001101001
19686	1	1001101001 (1) 1101101001
15591	1	0001101111 (1) 1001101111
19688	1	1001101001 (1) 1001001001
15593	1	0001101111 (1) 0001001111
19689	1	1001101001 (1) 1001111001
15594	1	0001101111 (1) 0001111111
19690	1	1001101001 (1) 1001100001
15595	1	0001101111 (1) 0001100111
19691	1	1001101001 (1) 1001101101
15596	1	0001101111 (1) 0001101101
19692	1	1001101001 (1) 1001101000
15597	1	0001101111 (1) 0001101110
19699	1	0001101001 (1) 1001101001
19701	1	0001101001 (1) 0001001001
19702	1	0001101001 (1) 0001111001
15607	1	1001101111 (1) 0001101111
19703	1	0001101001 (1) 0001100001
15608	1	1001101111 (1) 1101101111
19704	1	0001101001 (1) 0001101101
19705	1	0001101001 (1) 0001101000
15610	1	1001101111 (1) 1001001111
19706	1	0101100100 (1) 1101100100
15611	1	1001101111 (1) 1001111111
19707	1	0101100100 (1) 0001100100
15612	1	1001101111 (1) 1001100111
19708	1	0101100100 (1) 0101110100
15613	1	1001101111 (1) 1001101101
19709	1	0101100100 (1) 0101100000
15614	1	1001101111 (1) 1001101110
19710	1	0101100100 (1) 0101100101
15615	1	0000011111 (1) 1000011111
19711	1	0101000110 (1) 1101000110
19712	1	0101000110 (1) 0001000110
15617	1	0000011111 (1) 0001011111
19713	1	0101000110 (1) 0101100110
15618	1	0000011111 (1) 0000001111
19714	1	0101000110 (1) 0101000010
15619	1	0000011111 (1) 0000010111
19715	1	0101000110 (1) 0101000111
15620	1	0000011111 (1) 0000011110
19716	1	0101000101 (1) 1101000101
15621	1	1000011111 (1) 0000011111
19717	1	0101000101 (1) 0001000101
19718	1	0101000101 (1) 0101100101
15623	1	1000011111 (1) 1001011111
19719	1	0101000101 (1) 0101000111
15624	1	1000011111 (1) 1000001111
19720	1	0101000101 (1) 0101000100
15625	1	1000011111 (1) 1000010111
19721	1	1101100100 (1) 0101100100
15626	1	1000011111 (1) 1000011110
19722	1	1101100100 (1) 1101110100
19723	1	1101100100 (1) 1101100000
19724	1	1101100100 (1) 1101100101
19725	1	1101000110 (1) 0101000110
19726	1	1101000110 (1) 1101100110
19727	1	1101000110 (1) 1101000010
19728	1	1101000110 (1) 1101000111
19729	1	1101000101 (1) 0101000101
19730	1	1101000101 (1) 1101100101
19731	1	1101000101 (1) 1101000111
19732	1	1101000101 (1) 1101000100
19740	1	1001100100 (1) 0001100100
19741	1	1001100100 (1) 1101100100
19743	1	1001100100 (1) 1001110100
19744	1	1001100100 (1) 1001100000
19745	1	1001100100 (1) 1001100101
19746	1	1001000110 (1) 0001000110
19747	1	1001000110 (1) 1101000110
19749	1	1001000110 (1) 1001100110
19750	1	1001000110 (1) 1001000010
19751	1	1001000110 (1) 1001000111
19752	1	1001000101 (1) 0001000101
19753	1	1001000101 (1) 1101000101
19755	1	1001000101 (1) 1001100101
19756	1	1001000101 (1) 1001000111
19757	1	1001000101 (1) 1001000100
19764	1	0001100100 (1) 1001100100
19766	1	0001100100 (1) 0001110100
19767	1	0001100100 (1) 0001100000
19768	1	0001100100 (1) 0001100101
19769	1	0001000110 (1) 1001000110
19771	1	0001000110 (1) 0001100110
19772	1	0001000110 (1) 0001000010
19773	1	0001000110 (1) 0001000111
19774	1	0001000101 (1) 1001000101
19776	1	0001000101 (1) 0001100101
19777	1	0001000101 (1) 0001000111
19778	1	0001000101 (1) 0001000100
15692	1	0100101111 (1) 1100101111
15693	1	0100101111 (1) 0000101111
15694	1	0100101111 (1) 0101101111
15695	1	0100101111 (1) 0100001111
15696	1	0100101111 (1) 0100111111
15697	1	0100101111 (1) 0100100111
15698	1	0100101111 (1) 0100101101
15699	1	0100101111 (1) 0100101110
15700	1	0100101110 (1) 1100101110
15701	1	0100101110 (1) 0000101110
15702	1	0100101110 (1) 0101101110
15703	1	0100101110 (1) 0100001110
15704	1	0100101110 (1) 0100111110
15705	1	0100101110 (1) 0100100110
15706	1	0100101110 (1) 0100101010
15707	1	0100101110 (1) 0100101100
15708	1	0100101110 (1) 0100101111
15709	1	1100101111 (1) 0100101111
15710	1	1100101111 (1) 1101101111
15711	1	1100101111 (1) 1100001111
15712	1	1100101111 (1) 1100111111
15713	1	1100101111 (1) 1100100111
15714	1	1100101111 (1) 1100101101
15715	1	1100101111 (1) 1100101110
15716	1	1100101110 (1) 0100101110
15717	1	1100101110 (1) 1101101110
15718	1	1100101110 (1) 1100001110
15719	1	1100101110 (1) 1100111110
15720	1	1100101110 (1) 1100100110
15721	1	1100101110 (1) 1100101010
15722	1	1100101110 (1) 1100101100
15723	1	1100101110 (1) 1100101111
15732	1	1001101110 (1) 0001101110
15733	1	1001101110 (1) 1101101110
15735	1	1001101110 (1) 1001001110
15736	1	1001101110 (1) 1001111110
15737	1	1001101110 (1) 1001100110
15738	1	1001101110 (1) 1001101010
15739	1	1001101110 (1) 1001101100
15740	1	1001101110 (1) 1001101111
15741	1	1000101111 (1) 0000101111
15742	1	1000101111 (1) 1100101111
15744	1	1000101111 (1) 1001101111
15745	1	1000101111 (1) 1000001111
15746	1	1000101111 (1) 1000111111
15747	1	1000101111 (1) 1000100111
15748	1	1000101111 (1) 1000101101
15749	1	1000101111 (1) 1000101110
15750	1	1000101110 (1) 0000101110
15751	1	1000101110 (1) 1100101110
15753	1	1000101110 (1) 1001101110
15754	1	1000101110 (1) 1000001110
15755	1	1000101110 (1) 1000111110
15756	1	1000101110 (1) 1000100110
15757	1	1000101110 (1) 1000101010
15758	1	1000101110 (1) 1000101100
15759	1	1000101110 (1) 1000101111
15767	1	0001101110 (1) 1001101110
15769	1	0001101110 (1) 0001001110
15770	1	0001101110 (1) 0001111110
15771	1	0001101110 (1) 0001100110
15772	1	0001101110 (1) 0001101010
15773	1	0001101110 (1) 0001101100
15774	1	0001101110 (1) 0001101111
15775	1	0000101111 (1) 1000101111
15777	1	0000101111 (1) 0001101111
15778	1	0000101111 (1) 0000001111
15779	1	0000101111 (1) 0000111111
15780	1	0000101111 (1) 0000100111
15781	1	0000101111 (1) 0000101101
15782	1	0000101111 (1) 0000101110
15783	1	0000101110 (1) 1000101110
15785	1	0000101110 (1) 0001101110
15786	1	0000101110 (1) 0000001110
15787	1	0000101110 (1) 0000111110
15788	1	0000101110 (1) 0000100110
15789	1	0000101110 (1) 0000101010
15790	1	0000101110 (1) 0000101100
15791	1	0000101110 (1) 0000101111
15792	1	0101110111 (1) 1101110111
15793	1	0101110111 (1) 0001110111
15794	1	0101110111 (1) 0101110101
15795	1	0101110111 (1) 0101110110
15796	1	1101110111 (1) 0101110111
15797	1	1101110111 (1) 1001110111
15798	1	1101110111 (1) 1101110101
15799	1	1101110111 (1) 1101110110
19908	1	1100101001 (1) 0100101001
19909	1	1100101001 (1) 1101101001
19910	1	1100101001 (1) 1100001001
19911	1	1100101001 (1) 1100111001
19912	1	1100101001 (1) 1100100001
19913	1	1100101001 (1) 1100101101
19914	1	1100101001 (1) 1100101000
19915	1	0100101001 (1) 1100101001
19916	1	0100101001 (1) 0000101001
19917	1	0100101001 (1) 0101101001
19918	1	0100101001 (1) 0100001001
19919	1	0100101001 (1) 0100111001
19920	1	0100101001 (1) 0100100001
19921	1	0100101001 (1) 0100101101
19922	1	0100101001 (1) 0100101000
19923	1	0100101000 (1) 1100101000
19924	1	0100101000 (1) 0000101000
19925	1	0100101000 (1) 0101101000
15830	1	1001110111 (1) 0001110111
19926	1	0100101000 (1) 0100001000
19927	1	0100101000 (1) 0100111000
15832	1	1001110111 (1) 1001110101
19928	1	0100101000 (1) 0100100000
15833	1	1001110111 (1) 1001110110
19929	1	0100101000 (1) 0100101001
15834	1	0001110111 (1) 1001110111
15836	1	0001110111 (1) 0001110101
15837	1	0001110111 (1) 0001110110
15857	1	1101101110 (1) 0101101110
15858	1	1101101110 (1) 1101111110
15859	1	1101101110 (1) 1101100110
15860	1	1101101110 (1) 1101101010
15861	1	1101101110 (1) 1101101100
15862	1	1101101110 (1) 1101101111
15863	1	1101001111 (1) 0101001111
15864	1	1101001111 (1) 1101101111
15865	1	1101001111 (1) 1101000111
15866	1	1101001111 (1) 1101001110
15867	1	0101101110 (1) 1101101110
19963	1	1100101000 (1) 0100101000
15868	1	0101101110 (1) 0001101110
19964	1	1100101000 (1) 1101101000
15869	1	0101101110 (1) 0101111110
19965	1	1100101000 (1) 1100001000
15870	1	0101101110 (1) 0101100110
19966	1	1100101000 (1) 1100111000
15871	1	0101101110 (1) 0101101010
19967	1	1100101000 (1) 1100100000
15872	1	0101101110 (1) 0101101100
19968	1	1100101000 (1) 1100101001
15873	1	0101101110 (1) 0101101111
15874	1	0101001111 (1) 1101001111
15875	1	0101001111 (1) 0001001111
15876	1	0101001111 (1) 0101101111
15877	1	0101001111 (1) 0101000111
15878	1	0101001111 (1) 0101001110
15879	1	1001001111 (1) 0001001111
19975	1	1001101000 (1) 0001101000
15880	1	1001001111 (1) 1101001111
19976	1	1001101000 (1) 1101101000
15882	1	1001001111 (1) 1001000111
19978	1	1001101000 (1) 1001001000
15883	1	1001001111 (1) 1001001110
19979	1	1001101000 (1) 1001111000
15884	1	0001001111 (1) 1001001111
19980	1	1001101000 (1) 1001100000
19981	1	1001101000 (1) 1001101001
15886	1	0001001111 (1) 0001000111
19982	1	1000101001 (1) 0000101001
15887	1	0001001111 (1) 0001001110
19983	1	1000101001 (1) 1100101001
19985	1	1000101001 (1) 1001101001
19986	1	1000101001 (1) 1000001001
19987	1	1000101001 (1) 1000111001
19988	1	1000101001 (1) 1000100001
19989	1	1000101001 (1) 1000101101
15894	1	1100110111 (1) 0100110111
19990	1	1000101001 (1) 1000101000
15895	1	1100110111 (1) 1000110111
19991	1	1000101000 (1) 0000101000
15896	1	1100110111 (1) 1101110111
19992	1	1000101000 (1) 1100101000
15897	1	1100110111 (1) 1100110101
15898	1	1100110111 (1) 1100110110
19994	1	1000101000 (1) 1001101000
19995	1	1000101000 (1) 1000001000
19996	1	1000101000 (1) 1000111000
19997	1	1000101000 (1) 1000100000
19998	1	1000101000 (1) 1000101001
20004	1	0001101000 (1) 1001101000
20006	1	0001101000 (1) 0001001000
20007	1	0001101000 (1) 0001111000
20008	1	0001101000 (1) 0001100000
20009	1	0001101000 (1) 0001101001
15914	1	0100110111 (1) 1100110111
20010	1	0000101001 (1) 1000101001
15915	1	0100110111 (1) 0000110111
15916	1	0100110111 (1) 0101110111
20012	1	0000101001 (1) 0001101001
15917	1	0100110111 (1) 0100110101
20013	1	0000101001 (1) 0000001001
15918	1	0100110111 (1) 0100110110
20014	1	0000101001 (1) 0000111001
20015	1	0000101001 (1) 0000100001
20016	1	0000101001 (1) 0000101101
20017	1	0000101001 (1) 0000101000
20018	1	0000101000 (1) 1000101000
20020	1	0000101000 (1) 0001101000
20021	1	0000101000 (1) 0000001000
20022	1	0000101000 (1) 0000111000
20023	1	0000101000 (1) 0000100000
20024	1	0000101000 (1) 0000101001
20025	1	0101111000 (1) 1101111000
20026	1	0101111000 (1) 0001111000
20027	1	0101111000 (1) 0101111100
20028	1	0101111000 (1) 0101111001
20029	1	0101110001 (1) 1101110001
20030	1	0101110001 (1) 0001110001
20031	1	0101110001 (1) 0101111001
20032	1	0101110001 (1) 0101110101
20033	1	0101110001 (1) 0101110000
20034	1	1101111000 (1) 0101111000
20035	1	1101111000 (1) 1001111000
20036	1	1101111000 (1) 1101111100
20037	1	1101111000 (1) 1101111001
20038	1	1101110001 (1) 0101110001
20039	1	1101110001 (1) 1001110001
20040	1	1101110001 (1) 1101111001
20041	1	1101110001 (1) 1101110101
20042	1	1101110001 (1) 1101110000
15969	1	0000110111 (1) 1000110111
15971	1	0000110111 (1) 0001110111
15972	1	0000110111 (1) 0000110101
15973	1	0000110111 (1) 0000110110
15974	1	1000110111 (1) 0000110111
15976	1	1000110111 (1) 1001110111
15977	1	1000110111 (1) 1000110101
15978	1	1000110111 (1) 1000110110
20094	1	0101000100 (1) 1101000100
20095	1	0101000100 (1) 0001000100
16000	1	1101111110 (1) 0101111110
20096	1	0101000100 (1) 0101100100
16001	1	1101111110 (1) 1001111110
20097	1	0101000100 (1) 0101000000
16002	1	1101111110 (1) 1101110110
20098	1	0101000100 (1) 0101000110
16003	1	1101111110 (1) 1101111100
20099	1	0101000100 (1) 0101000101
16004	1	1101111110 (1) 1101111111
20100	1	0100100100 (1) 1100100100
16005	1	1101111011 (1) 0101111011
20101	1	0100100100 (1) 0000100100
16006	1	1101111011 (1) 1001111011
20102	1	0100100100 (1) 0101100100
16007	1	1101111011 (1) 1101110011
20103	1	0100100100 (1) 0100110100
16008	1	1101111011 (1) 1101111111
20104	1	0100100100 (1) 0100100000
16009	1	1101111011 (1) 1101111001
20105	1	0100100100 (1) 0100100101
16010	1	1101111011 (1) 1101111010
20106	1	0100000110 (1) 1100000110
16011	1	0101111110 (1) 1101111110
20107	1	0100000110 (1) 0000000110
16012	1	0101111110 (1) 0001111110
20108	1	0100000110 (1) 0101000110
16013	1	0101111110 (1) 0101110110
20109	1	0100000110 (1) 0100100110
16014	1	0101111110 (1) 0101111100
20110	1	0100000110 (1) 0100000010
16015	1	0101111110 (1) 0101111111
20111	1	0100000110 (1) 0100000111
20112	1	0100000101 (1) 1100000101
16016	1	0101111011 (1) 1101111011
20113	1	0100000101 (1) 0000000101
16017	1	0101111011 (1) 0001111011
20114	1	0100000101 (1) 0101000101
16018	1	0101111011 (1) 0101110011
20115	1	0100000101 (1) 0100100101
16019	1	0101111011 (1) 0101111111
20116	1	0100000101 (1) 0100000111
16020	1	0101111011 (1) 0101111001
20117	1	0100000101 (1) 0100000100
16021	1	0101111011 (1) 0101111010
20118	1	0100000100 (1) 1100000100
20119	1	0100000100 (1) 0000000100
20120	1	0100000100 (1) 0101000100
20121	1	0100000100 (1) 0100100100
20122	1	0100000100 (1) 0100000000
20123	1	0100000100 (1) 0100000110
20124	1	0100000100 (1) 0100000101
20125	1	1101000100 (1) 0101000100
20126	1	1101000100 (1) 1101100100
20127	1	1101000100 (1) 1101000000
20128	1	1101000100 (1) 1101000110
16032	1	1001111110 (1) 0001111110
20129	1	1101000100 (1) 1101000101
20130	1	1100100100 (1) 0100100100
16034	1	1001111110 (1) 1001011110
20131	1	1100100100 (1) 1101100100
16035	1	1001111110 (1) 1001110110
20132	1	1100100100 (1) 1100110100
16036	1	1001111110 (1) 1001111100
20133	1	1100100100 (1) 1100100000
16037	1	1001111110 (1) 1001111111
20134	1	1100100100 (1) 1100100101
16038	1	1001111011 (1) 0001111011
20135	1	1100000110 (1) 0100000110
20136	1	1100000110 (1) 1101000110
16040	1	1001111011 (1) 1001011011
20137	1	1100000110 (1) 1100100110
16041	1	1001111011 (1) 1001110011
20138	1	1100000110 (1) 1100000010
16042	1	1001111011 (1) 1001111111
20139	1	1100000110 (1) 1100000111
16043	1	1001111011 (1) 1001111001
20140	1	1100000101 (1) 0100000101
16044	1	1001111011 (1) 1001111010
20141	1	1100000101 (1) 1101000101
16045	1	0001111110 (1) 1001111110
20142	1	1100000101 (1) 1100100101
20143	1	1100000101 (1) 1100000111
16047	1	0001111110 (1) 0001011110
20144	1	1100000101 (1) 1100000100
16048	1	0001111110 (1) 0001110110
20145	1	1001111000 (1) 0001111000
16049	1	0001111110 (1) 0001111100
16050	1	0001111110 (1) 0001111111
20147	1	1001111000 (1) 1001011000
16051	1	0001111011 (1) 1001111011
20148	1	1001111000 (1) 1001111100
20149	1	1001111000 (1) 1001111001
16053	1	0001111011 (1) 0001011011
20150	1	1001110001 (1) 0001110001
16054	1	0001111011 (1) 0001110011
16055	1	0001111011 (1) 0001111111
20152	1	1001110001 (1) 1001010001
16056	1	0001111011 (1) 0001111001
20153	1	1001110001 (1) 1001111001
16057	1	0001111011 (1) 0001111010
20154	1	1001110001 (1) 1001110101
16058	1	0100001111 (1) 1100001111
20155	1	1001110001 (1) 1001110000
16059	1	0100001111 (1) 0000001111
20156	1	0001111000 (1) 1001111000
16060	1	0100001111 (1) 0101001111
16061	1	0100001111 (1) 0100000111
20158	1	0001111000 (1) 0001011000
16062	1	0100001111 (1) 0100001110
20159	1	0001111000 (1) 0001111100
16063	1	1100001111 (1) 0100001111
20160	1	0001111000 (1) 0001111001
16064	1	1100001111 (1) 1101001111
20161	1	0001110001 (1) 1001110001
16065	1	1100001111 (1) 1100000111
16066	1	1100001111 (1) 1100001110
20163	1	0001110001 (1) 0001010001
16067	1	1000001111 (1) 0000001111
20164	1	0001110001 (1) 0001111001
16068	1	1000001111 (1) 1100001111
20165	1	0001110001 (1) 0001110101
20166	1	0001110001 (1) 0001110000
16070	1	1000001111 (1) 1001001111
16071	1	1000001111 (1) 1000000111
16072	1	1000001111 (1) 1000001110
16073	1	0000001111 (1) 1000001111
16075	1	0000001111 (1) 0001001111
16076	1	0000001111 (1) 0000000111
16077	1	0000001111 (1) 0000001110
16078	1	0101010111 (1) 1101010111
16079	1	0101010111 (1) 0001010111
16080	1	0101010111 (1) 0101110111
16081	1	0101010111 (1) 0101000111
16082	1	0101010111 (1) 0101010110
16083	1	1101010111 (1) 0101010111
16084	1	1101010111 (1) 1001010111
16085	1	1101010111 (1) 1101110111
16086	1	1101010111 (1) 1101000111
16087	1	1101010111 (1) 1101010110
16088	1	1001010111 (1) 0001010111
16090	1	1001010111 (1) 1001110111
16091	1	1001010111 (1) 1001000111
16092	1	1001010111 (1) 1001010110
16093	1	0001010111 (1) 1001010111
16095	1	0001010111 (1) 0001110111
16096	1	0001010111 (1) 0001000111
16097	1	0001010111 (1) 0001010110
20213	1	1100000100 (1) 0100000100
20214	1	1100000100 (1) 1101000100
20215	1	1100000100 (1) 1100100100
20216	1	1100000100 (1) 1100000000
20217	1	1100000100 (1) 1100000110
20218	1	1100000100 (1) 1100000101
20225	1	1001000100 (1) 0001000100
20226	1	1001000100 (1) 1101000100
20228	1	1001000100 (1) 1001100100
20229	1	1001000100 (1) 1001000000
20230	1	1001000100 (1) 1001000110
20231	1	1001000100 (1) 1001000101
20232	1	1000100100 (1) 0000100100
20233	1	1000100100 (1) 1100100100
20235	1	1000100100 (1) 1001100100
20236	1	1000100100 (1) 1000110100
20237	1	1000100100 (1) 1000100000
20238	1	1000100100 (1) 1000100101
20239	1	1000000110 (1) 0000000110
20240	1	1000000110 (1) 1100000110
20242	1	1000000110 (1) 1001000110
20243	1	1000000110 (1) 1000100110
20244	1	1000000110 (1) 1000000010
20245	1	1000000110 (1) 1000000111
20246	1	1000000101 (1) 0000000101
20247	1	1000000101 (1) 1100000101
20249	1	1000000101 (1) 1001000101
20250	1	1000000101 (1) 1000100101
20251	1	1000000101 (1) 1000000111
20252	1	1000000101 (1) 1000000100
20253	1	1000000100 (1) 0000000100
20254	1	1000000100 (1) 1100000100
20256	1	1000000100 (1) 1001000100
20257	1	1000000100 (1) 1000100100
20258	1	1000000100 (1) 1000000000
20259	1	1000000100 (1) 1000000110
20260	1	1000000100 (1) 1000000101
20266	1	0001000100 (1) 1001000100
20268	1	0001000100 (1) 0001100100
20269	1	0001000100 (1) 0001000000
20270	1	0001000100 (1) 0001000110
20271	1	0001000100 (1) 0001000101
20272	1	0000100100 (1) 1000100100
20274	1	0000100100 (1) 0001100100
20275	1	0000100100 (1) 0000110100
20276	1	0000100100 (1) 0000100000
20277	1	0000100100 (1) 0000100101
20278	1	0000000110 (1) 1000000110
20280	1	0000000110 (1) 0001000110
20281	1	0000000110 (1) 0000100110
20282	1	0000000110 (1) 0000000010
20283	1	0000000110 (1) 0000000111
20284	1	0000000101 (1) 1000000101
20286	1	0000000101 (1) 0001000101
20287	1	0000000101 (1) 0000100101
20288	1	0000000101 (1) 0000000111
20289	1	0000000101 (1) 0000000100
20290	1	0000000100 (1) 1000000100
20292	1	0000000100 (1) 0001000100
20293	1	0000000100 (1) 0000100100
20294	1	0000000100 (1) 0000000000
20295	1	0000000100 (1) 0000000110
20296	1	0000000100 (1) 0000000101
16200	1	0100111110 (1) 1100111110
20297	1	1101101000 (1) 0101101000
16201	1	0100111110 (1) 0000111110
20298	1	1101101000 (1) 1101111000
16202	1	0100111110 (1) 0101111110
20299	1	1101101000 (1) 1101100000
16203	1	0100111110 (1) 0100011110
20300	1	1101101000 (1) 1101101001
16204	1	0100111110 (1) 0100110110
20301	1	1101001010 (1) 0101001010
16205	1	0100111110 (1) 0100111100
20302	1	1101001010 (1) 1101101010
16206	1	0100111110 (1) 0100111111
20303	1	1101001010 (1) 1101000010
16207	1	0100111011 (1) 1100111011
20304	1	1101001010 (1) 1101001011
16208	1	0100111011 (1) 0000111011
20305	1	1101001001 (1) 0101001001
16209	1	0100111011 (1) 0101111011
20306	1	1101001001 (1) 1101101001
16210	1	0100111011 (1) 0100011011
20307	1	1101001001 (1) 1101000001
16211	1	0100111011 (1) 0100110011
20308	1	1101001001 (1) 1101001101
16212	1	0100111011 (1) 0100111111
20309	1	1101001001 (1) 1101001011
16213	1	0100111011 (1) 0100111001
20310	1	1101001001 (1) 1101001000
16214	1	0100111011 (1) 0100111010
20311	1	0101101000 (1) 1101101000
16215	1	1100111110 (1) 0100111110
20312	1	0101101000 (1) 0001101000
16216	1	1100111110 (1) 1000111110
20313	1	0101101000 (1) 0101111000
16217	1	1100111110 (1) 1101111110
20314	1	0101101000 (1) 0101100000
16218	1	1100111110 (1) 1100011110
20315	1	0101101000 (1) 0101101001
16219	1	1100111110 (1) 1100110110
20316	1	0101001010 (1) 1101001010
16220	1	1100111110 (1) 1100111100
20317	1	0101001010 (1) 0001001010
16221	1	1100111110 (1) 1100111111
20318	1	0101001010 (1) 0101101010
16222	1	1100111011 (1) 0100111011
20319	1	0101001010 (1) 0101000010
16223	1	1100111011 (1) 1000111011
20320	1	0101001010 (1) 0101001011
16224	1	1100111011 (1) 1101111011
20321	1	0101001001 (1) 1101001001
16225	1	1100111011 (1) 1100011011
20322	1	0101001001 (1) 0001001001
16226	1	1100111011 (1) 1100110011
20323	1	0101001001 (1) 0101101001
16227	1	1100111011 (1) 1100111111
20324	1	0101001001 (1) 0101000001
16228	1	1100111011 (1) 1100111001
20325	1	0101001001 (1) 0101001101
16229	1	1100111011 (1) 1100111010
20326	1	0101001001 (1) 0101001011
20327	1	0101001001 (1) 0101001000
16248	1	0000111110 (1) 1000111110
16250	1	0000111110 (1) 0001111110
16251	1	0000111110 (1) 0000011110
16252	1	0000111110 (1) 0000110110
16253	1	0000111110 (1) 0000111100
16254	1	0000111110 (1) 0000111111
16255	1	0000111011 (1) 1000111011
16257	1	0000111011 (1) 0001111011
20354	1	1001001010 (1) 0001001010
16258	1	0000111011 (1) 0000011011
20355	1	1001001010 (1) 1101001010
16259	1	0000111011 (1) 0000110011
20356	1	1001001010 (1) 1001000010
16260	1	0000111011 (1) 0000111111
20357	1	1001001010 (1) 1001001011
16261	1	0000111011 (1) 0000111001
20358	1	1001001001 (1) 0001001001
16262	1	0000111011 (1) 0000111010
20359	1	1001001001 (1) 1101001001
16263	1	1000111110 (1) 0000111110
20360	1	1001001001 (1) 1001000001
20361	1	1001001001 (1) 1001001101
16265	1	1000111110 (1) 1001111110
20362	1	1001001001 (1) 1001001011
16266	1	1000111110 (1) 1000011110
20363	1	1001001001 (1) 1001001000
16267	1	1000111110 (1) 1000110110
20364	1	0001001010 (1) 1001001010
16268	1	1000111110 (1) 1000111100
20365	1	0001001010 (1) 0001000010
16269	1	1000111110 (1) 1000111111
20366	1	0001001010 (1) 0001001011
16270	1	1000111011 (1) 0000111011
20367	1	0001001001 (1) 1001001001
20368	1	0001001001 (1) 0001000001
16272	1	1000111011 (1) 1001111011
20369	1	0001001001 (1) 0001001101
16273	1	1000111011 (1) 1000011011
20370	1	0001001001 (1) 0001001011
16274	1	1000111011 (1) 1000110011
20371	1	0001001001 (1) 0001001000
16275	1	1000111011 (1) 1000111111
16276	1	1000111011 (1) 1000111001
16277	1	1000111011 (1) 1000111010
20390	1	1100111000 (1) 0100111000
20391	1	1100111000 (1) 1000111000
20392	1	1100111000 (1) 1101111000
20393	1	1100111000 (1) 1100011000
20394	1	1100111000 (1) 1100111100
20395	1	1100111000 (1) 1100111001
20396	1	1100110001 (1) 0100110001
20397	1	1100110001 (1) 1000110001
20398	1	1100110001 (1) 1101110001
20399	1	1100110001 (1) 1100010001
20400	1	1100110001 (1) 1100111001
20401	1	1100110001 (1) 1100110101
20402	1	1100110001 (1) 1100110000
16306	1	0101110110 (1) 1101110110
20403	1	0100111000 (1) 1100111000
16307	1	0101110110 (1) 0001110110
20404	1	0100111000 (1) 0000111000
16308	1	0101110110 (1) 0101110010
20405	1	0100111000 (1) 0101111000
16309	1	0101110110 (1) 0101110100
20406	1	0100111000 (1) 0100011000
16310	1	0101110110 (1) 0101110111
20407	1	0100111000 (1) 0100111100
16311	1	0101100111 (1) 1101100111
20408	1	0100111000 (1) 0100111001
16312	1	0101100111 (1) 0001100111
20409	1	0100110001 (1) 1100110001
16313	1	0101100111 (1) 0101110111
20410	1	0100110001 (1) 0000110001
16314	1	0101100111 (1) 0101100101
20411	1	0100110001 (1) 0101110001
16315	1	0101100111 (1) 0101100110
20412	1	0100110001 (1) 0100010001
16316	1	1100010111 (1) 0100010111
20413	1	0100110001 (1) 0100111001
16317	1	1100010111 (1) 1000010111
20414	1	0100110001 (1) 0100110101
16318	1	1100010111 (1) 1101010111
20415	1	0100110001 (1) 0100110000
16319	1	1100010111 (1) 1100110111
16320	1	1100010111 (1) 1100000111
16321	1	1100010111 (1) 1100010110
16322	1	0100010111 (1) 1100010111
16323	1	0100010111 (1) 0000010111
16324	1	0100010111 (1) 0101010111
16325	1	0100010111 (1) 0100110111
16326	1	0100010111 (1) 0100000111
16327	1	0100010111 (1) 0100010110
16332	1	1101110110 (1) 0101110110
16333	1	1101110110 (1) 1001110110
16334	1	1101110110 (1) 1101110010
16335	1	1101110110 (1) 1101110100
16336	1	1101110110 (1) 1101110111
16337	1	1101100111 (1) 0101100111
16338	1	1101100111 (1) 1101110111
16339	1	1101100111 (1) 1101100101
16340	1	1101100111 (1) 1101100110
20444	1	0000111000 (1) 1000111000
20446	1	0000111000 (1) 0001111000
20447	1	0000111000 (1) 0000011000
20448	1	0000111000 (1) 0000111100
20449	1	0000111000 (1) 0000111001
20450	1	0000110001 (1) 1000110001
20452	1	0000110001 (1) 0001110001
20453	1	0000110001 (1) 0000010001
20454	1	0000110001 (1) 0000111001
20455	1	0000110001 (1) 0000110101
16359	1	1001110110 (1) 0001110110
20456	1	0000110001 (1) 0000110000
20457	1	1000111000 (1) 0000111000
16361	1	1001110110 (1) 1001110010
16362	1	1001110110 (1) 1001110100
20459	1	1000111000 (1) 1001111000
16363	1	1001110110 (1) 1001110111
20460	1	1000111000 (1) 1000011000
16364	1	1001100111 (1) 0001100111
20461	1	1000111000 (1) 1000111100
16365	1	1001100111 (1) 1101100111
20462	1	1000111000 (1) 1000111001
20463	1	1000110001 (1) 0000110001
16367	1	1001100111 (1) 1001110111
16368	1	1001100111 (1) 1001100101
20465	1	1000110001 (1) 1001110001
16369	1	1001100111 (1) 1001100110
20466	1	1000110001 (1) 1000010001
16370	1	0000010111 (1) 1000010111
20467	1	1000110001 (1) 1000111001
20468	1	1000110001 (1) 1000110101
16372	1	0000010111 (1) 0001010111
20469	1	1000110001 (1) 1000110000
16373	1	0000010111 (1) 0000110111
16374	1	0000010111 (1) 0000000111
16375	1	0000010111 (1) 0000010110
16376	1	1000010111 (1) 0000010111
16378	1	1000010111 (1) 1001010111
16379	1	1000010111 (1) 1000110111
16380	1	1000010111 (1) 1000000111
16381	1	1000010111 (1) 1000010110
16382	1	0001110110 (1) 1001110110
16384	1	0001110110 (1) 0001110010
16385	1	0001110110 (1) 0001110100
16386	1	0001110110 (1) 0001110111
16387	1	0001100111 (1) 1001100111
16389	1	0001100111 (1) 0001110111
16390	1	0001100111 (1) 0001100101
16391	1	0001100111 (1) 0001100110
16392	1	0101111101 (1) 1101111101
16393	1	0101111101 (1) 0001111101
16394	1	0101111101 (1) 0101111100
16395	1	1101111101 (1) 0101111101
16396	1	1101111101 (1) 1001111101
16397	1	1101111101 (1) 1101111100
16398	1	0101011011 (1) 1101011011
16399	1	0101011011 (1) 0001011011
16400	1	0101011011 (1) 0101111011
16401	1	0101011011 (1) 0101001011
16402	1	0101011011 (1) 0101010011
16403	1	0101011011 (1) 0101011111
16404	1	0101011011 (1) 0101011010
[truncated: 4,148 more rows]
