# Supplementary material
Source: publisher figshare collection journal article supplement (https://springernature.figshare.com/ndownloader/files/17562821)
Supplement: Supplementary file 1 [file 17562821 › CytoscapeSession-2018_09_25-21_15/tables/14312-STG%2C+Model+1%2C+Fluctuating+Inputs/SHARED_ATTRS-org.cytoscape.model.CyNetwork-STG%2C+Model+1%2C+Fluctuating+Inputs+root+shared++network.cytable]

"CyCSV-Version","1"
"SUID","NormalizedSumInformationLoss","shared name","SumInformationLoss"
"java.lang.Long","java.lang.Double","java.lang.String","java.lang.Double"
"","mutable","","mutable"
"STG, Model 1, Fluctuating Inputs root shared  network",""
"14328",,"Prot2_allRegNodes.dot.sif",
"14312",,"",
"12396","0.3377637692905253","Prot2_allRegNodes.dot.sif(1)","2.6819729245134014"
"12406",,"Prot2_allRegNodes.dot.sif(2)",
