# Supplementary material
Source: publisher figshare collection journal article supplement (https://springernature.figshare.com/ndownloader/files/17562821)
Supplement: Supplementary file 1 [file 17562821 › CytoscapeSession-2018_09_25-21_15/tables/14312-STG%2C+Model+1%2C+Fluctuating+Inputs/SHARED_ATTRS-org.cytoscape.model.CyNode-STG%2C+Model+1%2C+Fluctuating+Inputs+root+shared++node.cytable]

CyCSV-Version	1
SUID	AcetylCoA	AMPK	CircFA	Citrate	FattyAcids	Glucose	MalonylCoA	PDC	PDK	Pyruvate	relEntH	relEntW	relEntX	relEntY	shared name
java.lang.Long	java.lang.Integer	java.lang.Integer	java.lang.Integer	java.lang.Integer	java.lang.Integer	java.lang.Integer	java.lang.Integer	java.lang.Integer	java.lang.Integer	java.lang.Integer	java.lang.Double	java.lang.Double	java.lang.Double	java.lang.Double	java.lang.String
	mutable	mutable	mutable	mutable	mutable	mutable	mutable	mutable	mutable	mutable
STG, Model 1, Fluctuating Inputs root shared node
14442	1	1	0	1	1	0	1	1	0	1	4.023048759576887E-4	0.1	-0.161772379203787	0.26287655686382094	0101111110
14441	1	1	1	1	0	1	1	1	0	1	6.711881734162151E-4	0.1	0.599819637443826	-0.19334796178783667	1101111011
14440	1	1	0	1	1	1	1	1	0	1	5.729776213733768E-4	0.1	0.34700721606619683	0.4298394576445043	1101111110
14435	1	1	1	1	1	1	0	0	0	0	5.698936732026012E-4	0.1	0.19872342816302035	-0.13315039488956115	1000110111
14434	1	1	1	1	1	0	0	0	0	0	5.145345141940272E-4	0.1	-0.24831078257184638	-0.2908768867152181	0000110111
14425	1	1	1	1	1	0	0	0	0	1	4.6163480550050803E-4	0.1	-0.2083179219947307	-0.23304728577109018	0100110111
14422	1	1	1	1	1	1	0	0	0	1	6.163467634926148E-4	0.1	0.1355987438001946	-0.11100481754551929	1100110111
14419	0	1	1	0	1	0	1	1	0	0	5.358120160616792E-4	0.1	-0.09466990833304108	-0.22561629206419598	0001001111
14418	0	1	1	0	1	1	1	1	0	0	0.0011012721332389677	0.1	0.5825775900440106	-0.02432753730325631	1001001111
14417	0	1	1	0	1	0	1	1	0	1	0.0010490853384394656	0.1	0.019513509120230043	-0.09568718837075851	0101001111
14416	1	1	0	0	1	0	1	1	0	1	0.001453723668743139	0.1	-0.14188306757302452	0.3408329511237306	0101101110
14415	0	1	1	0	1	1	1	1	0	1	9.531051306347011E-4	0.1	0.44353984036429894	0.02705689722311939	1101001111
14414	1	1	0	0	1	1	1	1	0	1	7.886604938343003E-4	0.1	0.2524914121374618	0.4315074787245769	1101101110
14409	1	1	1	1	1	0	0	1	0	0	5.241249803675094E-4	0.1	-0.31524008240153667	-0.27532537047232947	0001110111
14408	1	1	1	1	1	1	0	1	0	0	6.465663576560569E-4	0.1	0.3540500494376346	-0.030947700009250775	1001110111
14403	1	1	1	1	1	1	0	1	0	1	4.0312415826938906E-4	0.1	0.2768235306054624	-0.04940856971596383	1101110111
14402	1	1	1	1	1	0	0	1	0	1	2.7911851718258617E-4	0.1	-0.27293015984798147	-0.2560759443183556	0101110111
14401	1	1	0	0	1	0	1	0	0	0	3.306132303579097E-4	0.1	-0.2386329135850438	0.15579309704636696	0000101110
14400	1	1	1	0	1	0	1	0	0	0	2.9072259992425143E-4	0.1	-0.11176669523194989	-0.07672214951531217	0000101111
14399	1	1	0	0	1	0	1	1	0	0	7.747802448896215E-4	0.1	-0.16867560442013665	0.3329353095741024	0001101110
14397	1	1	0	0	1	1	1	0	0	0	1.1744363485465591E-4	0.1	0.13022343730677122	0.13832662611154062	1000101110
14396	1	1	1	0	1	1	1	0	0	0	1.0066871859863358E-4	0.1	0.17903365163332363	-0.01429260904276259	1000101111
14395	1	1	0	0	1	1	1	1	0	0	1.4938967787312627E-4	0.1	0.1583709889867228	0.1963719069049499	1001101110
14393	1	1	0	0	1	1	1	0	0	1	2.3581275382922605E-4	0.1	0.18564757602900775	0.21971105297960522	1100101110
14392	1	1	1	0	1	1	1	0	0	1	2.0015223780427838E-4	0.1	0.26331780010970873	-9.585614601751132E-4	1100101111
14391	1	1	0	0	1	0	1	0	0	1	3.9252325662376703E-4	0.1	-0.2381937901522855	0.15792704293569435	0100101110
14390	1	1	1	0	1	0	1	0	0	1	3.387970940844857E-4	0.1	-0.10586698969442532	-0.07616273768082761	0100101111
14379	0	1	1	1	1	1	1	0	0	0	6.577026785190941E-4	0.1	0.44058964882139595	-0.0988534743542861	1000011111
14378	0	1	1	1	1	0	1	0	0	0	4.593077182897651E-4	0.1	-0.04374052620221304	-0.25309168256028153	0000011111
14377	1	1	1	0	1	1	1	1	0	0	2.740532267558578E-4	0.1	0.11673901603486848	0.005024849485930525	1001101111
14375	1	1	1	0	1	0	1	1	0	0	8.178987716284968E-4	0.1	-0.020274671462928114	-0.02787523140315607	0001101111
14373	0	1	1	1	1	0	1	0	0	1	5.86383381495138E-4	0.1	-0.016215395804533277	-0.2030638917160049	0100011111
14372	0	1	1	1	1	1	1	0	0	1	6.516887342645628E-4	0.1	0.37186860564868934	-0.08790709065007504	1100011111
14371	1	1	1	0	1	1	1	1	0	1	5.678255196732962E-4	0.1	0.47026956345870174	0.08327263810720735	1101101111
14370	1	1	1	0	1	0	1	1	0	1	0.0011042012327075372	0.1	-0.02015345802759036	-0.04451072869423359	0101101111
14361	0	1	1	1	1	0	1	1	0	0	5.203111506388911E-4	0.1	-0.0796510757366314	-0.22420545597659064	0001011111
14360	0	1	1	1	1	1	1	1	0	0	9.418817249569326E-4	0.1	0.5961205915029342	-0.006053511022138213	1001011111
14359	0	1	1	1	1	1	1	1	0	1	4.986848308883099E-4	0.1	0.482240069464662	-0.022110500326319737	1101011111
14358	0	1	1	1	1	0	1	1	0	1	4.7081459445535046E-4	0.1	-9.956859893799274E-4	-0.16840334398162937	0101011111
14353	1	1	1	1	1	1	1	0	0	0	2.173215682286655E-4	0.1	0.3625165751770628	-0.0636309388006189	1000111111
14352	1	1	1	1	1	0	1	0	0	0	1.7308827270482615E-4	0.1	-0.013309885485026358	-0.17395601762202947	0000111111
14351	1	1	1	1	1	0	1	0	0	1	2.3418117181016817E-4	0.1	-0.003310803163802737	-0.15250170478600628	0100111111
14350	1	1	1	1	1	1	1	0	0	1	3.2756058809319254E-4	0.1	0.30679368501441623	-0.05779968255175933	1100111111
14345	1	1	1	1	1	0	1	1	0	0	3.2617704298683905E-4	0.1	-0.012418722498413151	-0.12880081705281143	0001111111
14344	1	1	1	1	1	1	1	1	0	0	4.2130972542467896E-4	0.1	0.5587374035486433	0.056222211347806694	1001111111
14343	1	1	1	1	1	0	1	1	0	1	3.75809815279631E-4	0.1	0.005177472445397437	-0.10555798353963693	0101111111
14342	1	1	1	1	1	1	1	1	0	1	5.476783443364011E-4	0.1	0.5228590214843009	0.06944937041784714	1101111111
15361	0	0	0	0	0	0	0	0	0	0	1.7424806861830071E-4	0.1	-0.3384760343252681	0.2874105372912206	0000000000
15360	0	0	1	0	0	0	0	0	0	0	5.446221879281999E-4	0.1	-0.21513947968535493	-0.41929347908625797	0000000001
15359	0	1	0	0	0	0	0	0	0	0	1.4421552361192094E-4	0.1	-0.3417355244038366	0.33783635662908085	0000000010
15358	0	0	0	0	0	0	0	1	0	0	1.6818538364002128E-4	0.1	-0.3624209596744203	0.32635798038692704	0001000000
15357	0	0	0	0	0	1	0	0	0	0	2.695901901315661E-4	0.1	0.02020211046569161	0.4617278832505717	1000000000
15356	0	0	1	0	0	1	0	0	0	0	7.013086279682129E-4	0.1	0.29320699762929	-0.2663818082410991	1000000001
15355	0	1	0	0	0	1	0	0	0	0	2.519829881235427E-4	0.1	-0.0381242085321382	0.521024776606245	1000000010
15354	0	0	0	0	0	1	0	1	0	0	3.836949055821877E-4	0.1	0.015040508402031754	0.5332681878950744	1001000000
15353	0	0	0	0	0	1	0	0	0	1	3.313333199136416E-4	0.1	-0.0199985308166568	0.4777583028555748	1100000000
15352	0	0	0	0	0	0	0	0	0	1	2.8738370838431453E-4	0.1	-0.4476527902882904	0.31240604164870545	0100000000
15351	0	0	1	0	0	0	0	0	0	1	4.687735397403234E-4	0.1	-0.1265198684222493	-0.44198356354565543	0100000001
15350	0	1	0	0	0	0	0	0	0	1	3.011174495749314E-4	0.1	-0.46001861176961756	0.3519117134844439	0100000010
15349	0	0	0	0	0	0	0	1	0	1	4.535289060555031E-4	0.1	-0.43814029871586674	0.36544310829004345	0101000000
15348	0	0	1	0	0	1	0	0	0	1	5.126899534842519E-4	0.1	0.22941246612076366	-0.302885625303018	1100000001
15347	0	1	0	0	0	1	0	0	0	1	3.440444748735829E-4	0.1	-0.08884352473399942	0.5278712755866082	1100000010
15346	0	0	0	0	0	1	0	1	0	1	6.296304626751953E-4	0.1	-0.044267825498704914	0.5484531312894716	1101000000
15333	0	0	1	0	0	1	0	1	0	0	7.601301390361275E-4	0.1	0.33217115800486907	-0.26393114097389103	1001000001
15332	0	1	0	0	0	1	0	1	0	0	4.236748219280022E-4	0.1	-0.05153658684979763	0.5694493696796524	1001000010
15331	0	0	1	0	0	0	0	1	0	0	5.40453789202338E-4	0.1	-0.1890277128789659	-0.4112537597852775	0001000001
15330	0	1	0	0	0	0	0	1	0	0	1.8199662973784076E-4	0.1	-0.30391310533692734	0.41048598180502804	0001000010
15329	0	0	1	0	0	1	0	1	0	1	5.324743960291563E-4	0.1	0.3340399636611111	-0.32808069474831253	1101000001
15328	0	1	0	0	0	1	0	1	0	1	7.47773748273471E-4	0.1	-0.045758037836304194	0.5899948330851531	1101000010
15327	1	0	0	0	0	1	0	1	0	1	7.096101003176771E-4	0.1	0.0026231710410740093	0.5569744879263544	1101100000
15326	0	0	1	0	0	0	0	1	0	1	4.0048348314073037E-4	0.1	-0.19033713611877653	-0.5050383742905731	0101000001
15325	0	1	0	0	0	0	0	1	0	1	6.108911782871368E-4	0.1	-0.5596420786422475	0.2992202128866934	0101000010
15324	1	0	0	0	0	0	0	1	0	1	8.138612668895856E-4	0.1	-0.5060303272885711	0.2854694173240195	0101100000
15309	1	0	0	0	0	1	0	0	0	0	5.112310323456402E-4	0.1	-0.030385417482917974	0.19121293785167065	1000100000
15308	1	0	1	0	0	1	0	0	0	0	2.5611538734208295E-4	0.1	0.20529123400119328	-0.4739055935241142	1000100001
15307	1	0	0	1	0	1	0	0	0	0	8.568512763173571E-4	0.1	0.05071988959028013	0.3358085820973081	1000110000
15306	1	0	0	0	0	1	0	1	0	0	5.607748917318339E-4	0.1	-0.04543364955858793	0.3081788202149912	1001100000
15304	1	0	0	0	0	1	0	0	0	1	9.341385591674744E-4	0.1	-0.0015628031085570633	0.28229761111458357	1100100000
15303	1	0	0	0	0	0	0	0	0	0	5.938476513586804E-4	0.1	-0.4165304513781827	0.1063277213567845	0000100000
15302	1	0	1	0	0	0	0	0	0	0	3.545165184888484E-4	0.1	-0.024261458622354397	-0.5689558627871242	0000100001
15301	1	0	0	1	0	0	0	0	0	0	7.690800585414262E-4	0.1	-0.3677168170471966	0.17880156271528413	0000110000
15300	1	0	0	0	0	0	0	1	0	0	9.9268346576992E-4	0.1	-0.46015756114664813	0.24384268211444413	0001100000
15298	1	0	0	0	0	0	0	0	0	1	7.105808546449587E-4	0.1	-0.474701792851379	0.13523068595049567	0100100000
15297	1	0	1	0	0	0	0	0	0	1	4.536769175833458E-4	0.1	0.002992871817585537	-0.581904472500925	0100100001
15296	1	0	0	1	0	0	0	0	0	1	0.0013643669190519451	0.1	-0.41057361709090323	0.23282654500970823	0100110000
15295	1	0	1	0	0	1	0	0	0	1	5.050523690624522E-4	0.1	0.24078826379244636	-0.5236953493330365	1100100001
15294	1	0	0	1	0	1	0	0	0	1	0.0019228701217370837	0.1	-0.0073133949822890695	0.3356042247649613	1100110000
15283	1	0	1	0	0	0	0	1	0	0	6.817142322477335E-4	0.1	-0.19863364640389852	-0.5560988062664658	0001100001
15282	1	0	0	1	0	0	0	1	0	0	0.0011444934114223774	0.1	-0.42908436844023556	0.2728291127853241	0001110000
15280	1	0	1	0	0	1	0	1	0	0	2.3111630237172118E-4	0.1	0.3282017204642202	-0.3365875588590151	1001100001
15279	1	0	0	1	0	1	0	1	0	0	0.001581474609391531	0.1	0.12273162268314516	0.5037051320745657	1001110000
15277	0	0	0	1	0	1	0	0	0	0	5.26681887429873E-4	0.1	0.10631658639267248	0.39849052344659575	1000010000
15276	0	0	1	1	0	1	0	0	0	0	8.165875038219632E-4	0.1	0.351901739124313	-0.3847865199103725	1000010001
15275	0	1	0	1	0	1	0	0	0	0	2.0276350263948316E-4	0.1	-0.02350926183494139	0.4276233562571128	1000010010
15274	0	0	0	1	0	1	1	0	0	0	0.0010122807108865757	0.1	0.27132904598386215	0.37940935535164066	1000011000
15273	0	0	0	1	0	1	0	1	0	0	6.239203066431313E-4	0.1	0.16900395456331416	0.5143775434930671	1001010000
15272	0	0	0	1	0	0	0	0	0	0	4.154883516773531E-4	0.1	-0.26118521522329763	0.2552273935255483	0000010000
15271	0	0	1	1	0	0	0	0	0	0	6.82860927406187E-4	0.1	-0.04907696217938291	-0.515327493552206	0000010001
15270	0	1	0	1	0	0	0	0	0	0	1.585962645165088E-4	0.1	-0.33843407420553334	0.27425281781210087	0000010010
15269	0	0	0	1	0	0	1	0	0	0	7.203056109049916E-4	0.1	-0.15648692714409723	0.21525254046805137	0000011000
15268	0	0	0	1	0	0	0	1	0	0	4.1413443291384337E-4	0.1	-0.31062531169190627	0.3123710661274807	0001010000
15267	1	0	1	0	0	1	0	1	0	1	6.160390311974462E-4	0.1	0.3804905544558285	-0.40954060645082585	1101100001
15266	1	0	0	1	0	1	0	1	0	1	0.001210413246465847	0.1	0.05686451852903176	0.5463288404144464	1101110000
15265	1	0	1	0	0	0	0	1	0	1	7.3423877504748E-4	0.1	-0.19799086591040418	-0.5600678285971875	0101100001
15264	1	0	0	1	0	0	0	1	0	1	6.339253427489231E-4	0.1	-0.45310404167511265	0.31153163698544023	0101110000
15263	0	0	0	1	0	1	0	0	0	1	9.58933317982826E-4	0.1	0.00548084566977128	0.3937199213643363	1100010000
15262	0	0	1	1	0	1	0	0	0	1	9.84855503444492E-4	0.1	0.3310856389833723	-0.5186067255543045	1100010001
15261	0	1	0	1	0	1	0	0	0	1	3.367117616308556E-4	0.1	-0.040118021660766896	0.4052508836671179	1100010010
15260	0	0	0	1	0	1	1	0	0	1	9.984153052960052E-4	0.1	0.10388900341270321	0.42404569094488975	1100011000
15259	0	0	0	1	0	1	0	1	0	1	3.3630887173149044E-4	0.1	0.03174509069235236	0.4409253440488411	1101010000
15258	0	0	0	1	0	0	0	0	0	1	8.070532498666645E-4	0.1	-0.4048881911314989	0.3109435602816132	0100010000
15257	0	0	1	1	0	0	0	0	0	1	8.120215697173682E-4	0.1	0.03880444020831198	-0.5915313251048986	0100010001
15256	0	1	0	1	0	0	0	0	0	1	2.9914242279250615E-4	0.1	-0.47405927426891786	0.27633975016305956	0100010010
15255	0	0	0	1	0	0	1	0	0	1	9.449660141392891E-4	0.1	-0.3008949167239136	0.3585194458337288	0100011000
15254	0	0	0	1	0	0	0	1	0	1	3.2557836088087144E-4	0.1	-0.38967796561673956	0.3535241874799681	0101010000
15229	0	0	1	1	0	0	0	1	0	0	6.588563394027222E-4	0.1	-0.08794574756122897	-0.5071114404708866	0001010001
15228	0	1	0	1	0	0	0	1	0	0	1.385005897258503E-4	0.1	-0.37637388005295364	0.3045282858566253	0001010010
15227	0	0	0	1	0	0	1	1	0	0	6.67793738532384E-4	0.1	-0.21294522548960612	0.26353184538110047	0001011000
15226	0	0	1	1	0	1	0	1	0	0	8.881499255897134E-4	0.1	0.47456840149007956	-0.3502597206772701	1001010001
15225	0	1	0	1	0	1	0	1	0	0	2.0235605739385602E-4	0.1	0.013335263139761497	0.5123290826853866	1001010010
15224	0	0	0	1	0	1	1	1	0	0	0.0012694592714061635	0.1	0.3738613839584521	0.5039949746904073	1001011000
15223	0	0	1	1	0	0	0	1	0	1	3.4441647149162775E-4	0.1	0.0306245892331073	-0.5642276123015266	0101010001
15222	0	1	0	1	0	0	0	1	0	1	3.161266103488332E-4	0.1	-0.4884086029767451	0.30984620152991144	0101010010
15221	0	0	0	1	0	0	1	1	0	1	5.510552447042393E-4	0.1	-0.27225530333477566	0.41201334785331145	0101011000
15220	0	0	1	1	0	1	0	1	0	1	3.712129550729358E-4	0.1	0.3649315950963044	-0.47992794624601265	1101010001
15219	0	1	0	1	0	1	0	1	0	1	3.2372998651484863E-4	0.1	-0.03586629147205114	0.47736363058860365	1101010010
15218	0	0	0	1	0	1	1	1	0	1	5.186669179601598E-4	0.1	0.15313799466548234	0.48062250343737295	1101011000
15217	0	0	0	0	0	1	1	0	0	0	4.643823264881122E-4	0.1	0.22348774755485634	0.4686503045015819	1000001000
15216	0	0	1	0	0	1	1	0	0	0	7.480341652459528E-4	0.1	0.4867154425985308	-0.20727622884773664	1000001001
15215	0	1	0	0	0	1	1	0	0	0	3.8122411039149905E-4	0.1	0.20533254926055808	0.531577248036997	1000001010
15214	0	0	0	0	0	1	1	1	0	0	8.397976735922567E-4	0.1	0.3020299544833269	0.5574331169376651	1001001000
15213	0	0	0	0	0	1	1	0	0	1	4.564549439198744E-4	0.1	0.21836143882591877	0.5075679991096832	1100001000
15212	0	0	0	0	0	0	1	0	0	0	2.620161475114073E-4	0.1	-0.1021726951518646	0.3425881016514479	0000001000
15211	0	0	1	0	0	0	1	0	0	0	4.7881491201928473E-4	0.1	0.04363761186181776	-0.3180587886352017	0000001001
15210	0	1	0	0	0	0	1	0	0	0	2.038610649052055E-4	0.1	-0.10029757003079606	0.38277016955471427	0000001010
15209	0	0	0	0	0	0	1	1	0	0	2.963306181351356E-4	0.1	-0.08875809407098026	0.3939166084549351	0001001000
15208	0	0	1	0	0	1	1	0	0	1	4.3773143570246674E-4	0.1	0.47669101921838464	-0.24547216710959663	1100001001
15207	0	1	0	0	0	1	1	0	0	1	4.457950184967605E-4	0.1	0.20578737960900026	0.587448319265552	1100001010
15206	0	0	0	0	0	1	1	1	0	1	8.451787163610109E-4	0.1	0.25061551964335316	0.5912466416697925	1101001000
15205	0	0	0	0	0	0	1	0	0	1	4.4000695385908856E-4	0.1	-0.2625652384334786	0.4008821476752903	0100001000
15204	0	0	1	0	0	0	1	0	0	1	4.480871894116199E-4	0.1	0.07619353279912214	-0.3867697386940264	0100001001
15203	0	1	0	0	0	0	1	0	0	1	4.056032130379359E-4	0.1	-0.24013285997883632	0.4774141247457081	0100001010
15202	0	0	0	0	0	0	1	1	0	1	7.125341592898355E-4	0.1	-0.24585452188405196	0.47225594606928445	0101001000
15178	1	0	1	1	0	1	0	0	0	0	5.135887958094448E-4	0.1	0.3396488976817911	-0.48035245026998064	1000110001
15177	1	0	0	1	0	1	1	0	0	0	4.736493842014612E-4	0.1	0.14022097654361287	0.3781215490705211	1000111000
15176	1	0	1	1	0	0	0	0	0	0	4.391357203491273E-4	0.1	-1.7964411351319864E-4	-0.5788534067102917	0000110001
15175	1	0	0	1	0	0	1	0	0	0	3.8192414599527556E-4	0.1	-0.26577892839135675	0.24435435348483964	0000111000
15169	1	0	1	1	0	0	0	0	0	1	7.506686717628784E-4	0.1	0.046693181457404004	-0.6082797058958151	0100110001
15168	1	0	0	1	0	0	1	0	0	1	6.605288968321932E-4	0.1	-0.3189215669122429	0.3111776110765135	0100111000
15167	1	0	1	1	0	1	0	0	0	1	0.0010540677091450436	0.1	0.30293847289606596	-0.541481805251111	1100110001
15166	1	0	0	1	0	1	1	0	0	1	8.597195171790926E-4	0.1	0.052663717816226537	0.38431462853966314	1100111000
15161	0	0	1	0	0	0	1	1	0	0	4.170516511644008E-4	0.1	-0.008137029238436719	-0.3082622440470505	0001001001
15160	0	1	0	0	0	0	1	1	0	0	1.553939947485392E-4	0.1	-0.15504147748435848	0.3662704720069473	0001001010
15159	0	0	1	0	0	1	1	1	0	0	0.0010503329837199015	0.1	0.6203890968340205	-0.16628303419511278	1001001001
15158	0	1	0	0	0	1	1	1	0	0	6.267516699362658E-4	0.1	0.2814028269376364	0.6135822082914177	1001001010
15153	0	0	1	0	0	0	1	1	0	1	7.879125229634481E-4	0.1	0.14414368171630884	-0.37440548551818137	0101001001
15152	0	1	0	0	0	0	1	1	0	1	0.0012624088163527272	0.1	-0.20647733691997827	0.5551989819696197	0101001010
15151	1	0	0	0	0	0	1	1	0	1	0.0010637463958937843	0.1	-0.22194514427599166	0.4938561223508749	0101101000
15150	0	0	1	0	0	1	1	1	0	1	8.768150156889247E-4	0.1	0.534626321855735	-0.2466118652306041	1101001001
15149	0	1	0	0	0	1	1	1	0	1	0.0013978052092609747	0.1	0.19466545961954348	0.6491301468719253	1101001010
15148	1	0	0	0	0	1	1	1	0	1	5.894807132124268E-4	0.1	0.11466852531071782	0.586348448647046	1101101000
15147	0	0	0	0	1	0	0	0	0	0	5.693025744687763E-4	0.1	-0.3512694933050203	-0.1250573043533216	0000000100
15146	0	0	1	0	1	0	0	0	0	0	8.734088189024101E-4	0.1	-0.2713747866516948	-0.3377949839003614	0000000101
15145	0	1	0	0	1	0	0	0	0	0	7.728906029832313E-4	0.1	-0.43012620394489676	-0.13547730191286597	0000000110
15144	1	0	0	0	1	0	0	0	0	0	7.662421211469355E-4	0.1	-0.42177750132884895	-0.0530897418448046	0000100100
15143	0	0	0	0	1	0	0	1	0	0	5.731067867042618E-4	0.1	-0.3815267778955527	-0.0907392868136901	0001000100
15141	0	0	0	0	1	1	0	0	0	0	6.787399061131663E-4	0.1	0.25216055839999335	0.07727076961401819	1000000100
15140	0	0	1	0	1	1	0	0	0	0	0.0010394296371008423	0.1	0.27792481054801754	-0.16693438254351856	1000000101
15139	0	1	0	0	1	1	0	0	0	0	9.219514860141472E-4	0.1	0.141501821542438	0.05415179635768411	1000000110
15138	1	0	0	0	1	1	0	0	0	0	7.740610064243124E-4	0.1	0.09745669194318701	0.10065100577743144	1000100100
15137	0	0	0	0	1	1	0	1	0	0	5.93570343781417E-4	0.1	0.3565775411181198	0.14434559402112754	1001000100
15135	0	0	0	0	1	1	0	0	0	1	5.897102846626561E-4	0.1	0.16105503351870282	0.1229967917362763	1100000100
15127	1	0	1	1	0	0	0	1	0	0	8.234167168814405E-4	0.1	-0.09091061950051685	-0.5588666304964285	0001110001
15126	1	0	0	1	0	0	1	1	0	0	6.606222185696215E-4	0.1	-0.3085173476109871	0.3248031462995211	0001111000
15125	1	0	1	1	0	1	0	1	0	0	0.0011748918957360179	0.1	0.4685935616925437	-0.4206289435431469	1001110001
15124	1	0	0	1	0	1	1	1	0	0	0.0010547033536717927	0.1	0.25410880771810557	0.5299231460728714	1001111000
15123	0	0	1	0	1	1	0	0	0	1	6.825997987281934E-4	0.1	0.2018860535617282	-0.11051296525211698	1100000101
15122	0	1	0	0	1	1	0	0	0	1	7.028279642374693E-4	0.1	0.07720832744278648	0.10453082273647835	1100000110
15121	1	0	0	0	1	1	0	0	0	1	0.0013155610062491132	0.1	0.06259772657823005	0.15705592428232962	1100100100
15120	0	0	0	0	1	1	0	1	0	1	2.671311488229443E-4	0.1	0.23724031042051008	0.2140544311609494	1101000100
15119	0	0	0	0	1	0	0	0	0	1	5.307359190036317E-4	0.1	-0.3548872319606428	-0.07397839831395067	0100000100
15118	0	0	1	0	1	0	0	0	0	1	6.115905277823643E-4	0.1	-0.2406505744176828	-0.28917685817303795	0100000101
15117	0	1	0	0	1	0	0	0	0	1	6.813868997919738E-4	0.1	-0.42068520017958383	-0.0776524293710751	0100000110
15116	1	0	0	0	1	0	0	0	0	1	9.162193352251278E-4	0.1	-0.424553609703643	-0.01067107089940516	0100100100
15115	0	0	0	0	1	0	0	1	0	1	3.3005615104072535E-4	0.1	-0.4008490531506946	-0.05088223909006866	0101000100
15107	1	0	1	1	0	1	0	1	0	1	0.0010007982453603486	0.1	0.43978268548425375	-0.44369784632189874	1101110001
15106	1	0	0	1	0	1	1	1	0	1	7.21588338884186E-4	0.1	0.18316500718172762	0.56442933802509	1101111000
15105	1	0	1	1	0	0	0	1	0	1	5.098684217898617E-4	0.1	-0.08685333777220647	-0.5671705369334601	0101110001
15104	1	0	0	1	0	0	1	1	0	1	3.8947361191754917E-4	0.1	-0.3107778847284616	0.37740240661280156	0101111000
15103	1	0	0	0	0	0	1	0	0	0	3.077324875066975E-4	0.1	-0.2674382456165095	0.29559703429463147	0000101000
15102	1	0	1	0	0	0	1	0	0	0	2.6327320705117185E-4	0.1	0.07531753913063062	-0.3915066795069862	0000101001
15101	1	0	0	0	0	0	1	1	0	0	7.161171604818341E-4	0.1	-0.24564443166394662	0.4593397010866993	0001101000
15099	1	0	0	0	0	1	1	0	0	0	1.325549499867311E-4	0.1	0.09091846220588057	0.26975539844197244	1000101000
15098	1	0	1	0	0	1	1	0	0	0	1.1497596210496716E-4	0.1	0.3029015038296219	-0.24746747327653265	1000101001
15097	1	0	0	0	0	1	1	1	0	0	1.688825518325712E-4	0.1	0.13945719419882566	0.3458140730133231	1001101000
15095	1	0	0	0	0	1	1	0	0	1	2.662572275741882E-4	0.1	0.0964367902609267	0.34514911466091774	1100101000
15087	1	0	0	0	0	0	1	0	0	1	3.7366824591158766E-4	0.1	-0.2794695926991768	0.2973969571445693	0100101000
15086	1	0	1	0	0	0	1	0	0	1	3.711775335691946E-4	0.1	0.10825361319577839	-0.3988094867935997	0100101001
15085	1	0	1	0	0	1	1	0	0	1	2.550550091951442E-4	0.1	0.2815138148280038	-0.34891871131393953	1100101001
15063	0	0	1	0	1	0	0	1	0	0	8.025934773337222E-4	0.1	-0.3066232375790905	-0.32353071829717067	0001000101
15062	0	1	0	0	1	0	0	1	0	0	7.402811886279033E-4	0.1	-0.4930491538881945	-0.0942784505246658	0001000110
15061	1	0	0	0	1	0	0	1	0	0	8.409024536296197E-4	0.1	-0.4893431901243729	0.01180420757997185	0001100100
15059	0	0	1	0	1	1	0	1	0	0	9.190916628827859E-4	0.1	0.3801742373496702	-0.11471444173490263	1001000101
15058	0	1	0	0	1	1	0	1	0	0	8.238961671621478E-4	0.1	0.2586302918465952	0.13249489291867791	1001000110
15057	1	0	0	0	1	1	0	1	0	0	6.617321666747369E-4	0.1	0.18778153618360807	0.1924169298894107	1001100100
15055	0	0	1	0	1	1	0	1	0	1	2.8731175021972586E-4	0.1	0.30683228171415144	-0.05256402417842108	1101000101
15054	0	1	0	0	1	1	0	1	0	1	3.337639025727514E-4	0.1	0.14729053854929386	0.2249087353795382	1101000110
15053	1	0	0	0	1	1	0	1	0	1	4.598606179562173E-4	0.1	0.16463279686139057	0.28845649464130374	1101100100
15052	0	0	1	0	1	0	0	1	0	1	3.3616564102232894E-4	0.1	-0.3154854202958909	-0.3028328707296293	0101000101
15051	0	1	0	0	1	0	0	1	0	1	4.2984793729905095E-4	0.1	-0.5064275759205746	-0.041645887201269154	0101000110
15050	1	0	0	0	1	0	0	1	0	1	5.166785269502638E-4	0.1	-0.49175104780805756	0.030300143981037357	0101100100
15049	1	0	1	0	0	0	1	1	0	0	6.424681308344199E-4	0.1	0.034887246594827157	-0.377565747228432	0001101001
15047	1	0	1	0	0	1	1	1	0	0	1.5107733879047409E-4	0.1	0.4035126273266494	-0.16710771927138293	1001101001
15045	0	0	1	1	0	0	1	0	0	0	4.7014143362934704E-4	0.1	0.02926262885960452	-0.36429347274531265	0000011001
15044	0	1	0	1	0	0	1	0	0	0	3.827295486086336E-4	0.1	-0.14883993005517088	0.1669617781173332	0000011010
15043	0	0	0	1	1	0	1	0	0	0	9.612426009134591E-4	0.1	-0.15731276048543383	0.05748991838092572	0000011100
15042	0	0	1	1	0	1	1	0	0	0	6.758926663188542E-4	0.1	0.4968705538812457	-0.24019751381972063	1000011001
15041	0	1	0	1	0	1	1	0	0	0	5.00099321624097E-4	0.1	0.31476269844191235	0.35777045765603693	1000011010
15040	0	0	0	1	1	1	1	0	0	0	0.0016342634891937289	0.1	0.402080307868506	0.25494106737167693	1000011100
15036	1	0	1	0	0	1	1	1	0	1	3.480804717500397E-4	0.1	0.5388559142564675	-0.26169938803488474	1101101001
15035	1	0	1	0	0	0	1	1	0	1	8.192214609414644E-4	0.1	0.06495296417807052	-0.3871333594185253	0101101001
15030	0	0	1	1	0	0	1	0	0	1	7.281937712312401E-4	0.1	0.10768483657159622	-0.47777943760904956	0100011001
15029	0	1	0	1	0	0	1	0	0	1	4.6346063869183614E-4	0.1	-0.2387183711622041	0.3781777487482152	0100011010
15028	0	0	0	1	1	0	1	0	0	1	0.0012281469692325194	0.1	-0.15181157816732596	0.08748095770705194	0100011100
15027	0	0	1	1	0	1	1	0	0	1	7.214761996282255E-4	0.1	0.42946313009943576	-0.3812760476793543	1100011001
15026	0	1	0	1	0	1	1	0	0	1	4.8619775949667183E-4	0.1	0.1580294988810327	0.4387320246735711	1100011010
15025	0	0	0	1	1	1	1	0	0	1	0.0012933887127003101	0.1	0.27339141070408546	0.2222980717811488	1100011100
15017	0	1	1	0	0	0	0	0	0	0	5.626543350634052E-4	0.1	-0.32468184090396196	-0.3878206930314071	0000000011
15016	0	1	1	0	0	1	0	0	0	0	7.570891220872935E-4	0.1	0.21707655571952988	-0.22352523722752485	1000000011
15015	1	0	1	0	1	1	0	0	0	0	6.801999068988394E-4	0.1	0.14343966066527608	-0.09703364602940251	1000100101
15014	1	0	0	1	1	1	0	0	0	0	9.730279397763062E-4	0.1	0.1417796114462316	0.19599315548027688	1000110100
15013	0	1	1	0	0	1	0	0	0	1	4.4780369147893805E-4	0.1	0.20625308794303707	-0.24095371434762733	1100000011
15012	0	1	1	0	0	0	0	0	0	1	4.0159055992094664E-4	0.1	-0.2614793641547457	-0.42630556352941845	0100000011
15011	1	0	1	0	1	0	0	0	0	0	6.725045623992303E-4	0.1	-0.2743329939435829	-0.2282068418917779	0000100101
15010	1	0	0	1	1	0	0	0	0	0	8.462050586927933E-4	0.1	-0.32658507848962864	0.021088821515097254	0000110100
15001	1	0	1	0	1	0	0	0	0	1	7.200355195819438E-4	0.1	-0.24460725253250237	-0.18184093199846896	0100100101
15000	1	0	0	1	1	0	0	0	0	1	0.0011100612315349887	0.1	-0.33852445539381953	0.06890016873613908	0100110100
14996	1	0	1	0	1	1	0	0	0	1	0.0010229735067115832	0.1	0.11536616479819535	-0.052818529086082325	1100100101
14995	1	0	0	1	1	1	0	0	0	1	0.0016429414599003819	0.1	0.0657473854921792	0.19621182236257512	1100110100
14977	0	0	1	1	0	0	1	1	0	0	4.90781196553859E-4	0.1	-0.006840862873519482	-0.35466228525212096	0001011001
14976	0	1	0	1	0	0	1	1	0	0	3.382148746430598E-4	0.1	-0.18309813705397163	0.22878130113893888	0001011010
14975	0	0	0	1	1	0	1	1	0	0	0.0012116649897459567	0.1	-0.19193257533866856	0.08617947038458541	0001011100
14974	0	0	1	1	0	1	1	1	0	0	9.653926376101452E-4	0.1	0.6275168861144634	-0.19934663735755945	1001011001
14973	0	1	0	1	0	1	1	1	0	0	5.536280406046572E-4	0.1	0.4104247679815796	0.48557849662916813	1001011010
14972	0	0	0	1	1	1	1	1	0	0	0.0026630734942124494	0.1	0.5303133169364852	0.3547271080824655	1001011100
14971	0	0	1	1	0	0	1	1	0	1	4.555764587031148E-4	0.1	0.12015091565287547	-0.4514794313462947	0101011001
14970	0	1	0	1	0	0	1	1	0	1	5.008566202169333E-4	0.1	-0.23427925015491943	0.4547111711937524	0101011010
14969	0	0	0	1	1	0	1	1	0	1	5.846468516345918E-4	0.1	-0.1357659386853389	0.12939489684451688	0101011100
14968	0	0	1	1	0	1	1	1	0	1	4.016257700503954E-4	0.1	0.49210300057313633	-0.34253232172580494	1101011001
14967	0	1	0	1	0	1	1	1	0	1	4.91493252250539E-4	0.1	0.21329884240480465	0.5272928653280483	1101011010
14966	0	0	0	1	1	1	1	1	0	1	5.812788736933404E-4	0.1	0.37047586904040203	0.28174438303452665	1101011100
14965	0	1	1	0	0	0	0	1	0	0	4.405170202349275E-4	0.1	-0.36274887374595904	-0.39033410071132263	0001000011
14964	0	1	1	0	0	1	0	1	0	0	7.245952833262074E-4	0.1	0.2955342321845722	-0.21287585361555608	1001000011
14963	1	0	1	0	1	0	0	1	0	0	6.583890634612185E-4	0.1	-0.3950513586725181	-0.23827022943806986	0001100101
14962	1	0	0	1	1	0	0	1	0	0	0.0010009417636196423	0.1	-0.40039549788504175	0.08923250650389324	0001110100
14961	0	1	1	0	0	1	0	1	0	1	6.859876090817721E-4	0.1	0.2633439761539584	-0.31495236305501767	1101000011
14960	1	1	0	0	0	1	0	1	0	1	7.286858306719907E-4	0.1	-0.02514930081403713	0.5702413751055615	1101100010
14959	1	0	1	0	1	1	0	1	0	0	5.657593574871569E-4	0.1	0.3200947567759164	-7.498284787209236E-4	1001100101
14958	1	0	0	1	1	1	0	1	0	0	0.0013439073737607935	0.1	0.2853561728891805	0.3430848505832301	1001110100
14957	0	1	1	0	0	0	0	1	0	1	6.077281128801841E-4	0.1	-0.26453158679406097	-0.5143666793977231	0101000011
14956	1	1	0	0	0	0	0	1	0	1	9.678992168184727E-4	0.1	-0.5949760704557896	0.2407524266374779	0101100010
14955	0	0	0	1	1	0	0	0	0	0	2.4255040410841452E-4	0.1	-0.18027499649858958	-0.28060578162214334	0000010100
14954	0	0	1	1	1	0	0	0	0	0	6.045944730618669E-4	0.1	-0.10847816359313271	-0.45355362013844597	0000010101
14953	0	1	0	1	1	0	0	0	0	0	6.153447244118718E-4	0.1	-0.29750929364032697	-0.06886841410431759	0000010110
14952	0	0	0	1	1	0	0	1	0	0	2.5285608720516874E-4	0.1	-0.18575055721463815	-0.2377089683162332	0001010100
14950	0	0	0	1	1	1	0	0	0	0	2.937327991861993E-4	0.1	0.2888226678753657	-0.10396743550640025	1000010100
14943	0	0	1	1	1	1	0	0	0	0	7.057111605637663E-4	0.1	0.3369638955434283	-0.30230566277795623	1000010101
14942	0	1	0	1	1	1	0	0	0	0	7.444888159072472E-4	0.1	0.19577919585765796	0.10505061089070034	1000010110
14941	0	0	0	1	1	1	0	1	0	0	3.265289603612991E-4	0.1	0.37984877299781467	-0.019184733795450645	1001010100
14939	1	0	1	0	1	1	0	1	0	1	4.092284286375454E-4	0.1	0.2764400460071124	0.017276002432974363	1101100101
14938	1	0	0	1	1	1	0	1	0	1	7.731635325524201E-4	0.1	0.20414139769101644	0.3349664434189798	1101110100
14937	1	0	1	0	1	0	0	1	0	1	4.1452956748720405E-4	0.1	-0.3745192655324884	-0.22542842820009626	0101100101
14936	1	0	0	1	1	0	0	1	0	1	4.640863969774169E-4	0.1	-0.39566622728168954	0.10668122746085962	0101110100
14935	0	0	0	1	1	0	0	0	0	1	2.2122979490829222E-4	0.1	-0.13071453718188822	-0.26067512313047453	0100010100
14934	0	0	1	1	1	0	0	0	0	1	4.445327011386198E-4	0.1	-0.022708557269845043	-0.48496093998804984	0100010101
14933	0	1	0	1	1	0	0	0	0	1	4.8313538323545725E-4	0.1	-0.27884319000292196	-0.010518604461944974	0100010110
14932	0	0	0	1	1	0	0	1	0	1	1.8544834085350103E-4	0.1	-0.15853020382271416	-0.18051257563621914	0101010100
14931	0	0	0	1	1	1	0	0	0	1	2.442988837575051E-4	0.1	0.23795610585210242	-0.1878899953025603	1100010100
14930	0	0	1	1	1	1	0	0	0	1	5.250771760520647E-4	0.1	0.30188506240969576	-0.41090407295907855	1100010101
14929	0	1	0	1	1	1	0	0	0	1	5.142045281395819E-4	0.1	0.14411149619408103	0.12404254127107105	1100010110
14928	0	0	0	1	1	1	0	1	0	1	2.035855677306596E-4	0.1	0.28385589674162737	-0.07818013728528014	1101010100
14920	1	0	1	1	0	1	1	0	0	0	3.4609165726907806E-4	0.1	0.44156398431493243	-0.35018967724050665	1000111001
14919	1	0	0	1	1	1	1	0	0	0	8.819546883324649E-4	0.1	0.3014414740837999	0.2315644460060003	1000111100
14917	1	0	1	1	0	0	1	0	0	0	2.6875298097609184E-4	0.1	0.06377899753358052	-0.45285293093084167	0000111001
14916	1	0	0	1	1	0	1	0	0	0	5.984740015779129E-4	0.1	-0.18638871457050826	0.0532199495238326	0000111100
14913	1	0	1	1	0	0	1	0	0	1	4.286873670568159E-4	0.1	0.10027275270432981	-0.5016999223452703	0100111001
14912	1	0	0	1	1	0	1	0	0	1	8.593376250359815E-4	0.1	-0.19354174678586564	0.07804621817781648	0100111100
14907	1	0	1	1	0	1	1	0	0	1	5.358696890212689E-4	0.1	0.3802110573538077	-0.4165592869114366	1100111001
14906	1	0	0	1	1	1	1	0	0	1	0.0010996272519533956	0.1	0.19216267080183252	0.20733478697823823	1100111100
14889	1	1	0	0	0	0	0	0	0	0	4.4399720103772007E-4	0.1	-0.5279868790529052	0.012556086771588247	0000100010
14888	1	1	1	0	0	0	0	0	0	0	2.1195535091191433E-4	0.1	-0.15627939124093032	-0.5713353590477418	0000100011
14887	1	1	0	1	0	0	0	0	0	0	4.507722968460645E-4	0.1	-0.44676829325349443	0.11649615486974378	0000110010
14886	1	1	0	0	0	0	0	1	0	0	7.453806589805439E-4	0.1	-0.5921733124192738	0.17856957757730943	0001100010
14884	1	1	0	0	0	1	0	0	0	0	3.715355985925639E-4	0.1	0.012324391272870511	0.12159055443260312	1000100010
14883	1	1	1	0	0	1	0	0	0	0	1.2614793067521537E-4	0.1	0.2214336410910315	-0.41746623034291647	1000100011
14882	1	1	0	1	0	1	0	0	0	0	4.89968777868418E-4	0.1	0.019649020558684997	0.29324484857429656	1000110010
14881	1	1	0	0	0	1	0	1	0	0	3.270676924289211E-4	0.1	0.0728145269352269	0.2242784546897763	1001100010
14879	1	1	0	0	0	1	0	0	0	1	6.006285197329792E-4	0.1	-0.011763097138701552	0.21555101441650848	1100100010
14874	1	1	1	0	0	1	0	0	0	1	2.426658726147233E-4	0.1	0.2392192004354342	-0.48017759069538085	1100100011
14873	1	1	0	1	0	1	0	0	0	1	8.422397000151101E-4	0.1	-0.016895512624540716	0.2918549033509839	1100110010
14872	1	1	0	0	0	0	0	0	0	1	5.189928513501336E-4	0.1	-0.5268724362421412	0.05019865183870774	0100100010
14871	1	1	1	0	0	0	0	0	0	1	2.575875577301242E-4	0.1	-0.1306732791851478	-0.5720237987226878	0100100011
14870	1	1	0	1	0	0	0	0	0	1	6.017221295947316E-4	0.1	-0.4751217735789691	0.15627511837545538	0100110010
14865	0	0	1	1	1	1	0	1	0	0	7.244643948143342E-4	0.1	0.4341207716330613	-0.24988942611398957	1001010101
14864	0	1	0	1	1	1	0	1	0	0	7.490300418366117E-4	0.1	0.2848094945432407	0.1865533008654102	1001010110
14862	0	0	1	1	1	0	0	1	0	0	5.760882799970131E-4	0.1	-0.11357111575994865	-0.4238784322095339	0001010101
14861	0	1	0	1	1	0	0	1	0	0	6.121690298037059E-4	0.1	-0.31325914373552405	-0.018310993410246907	0001010110
14854	0	0	1	1	1	0	0	1	0	1	2.656633607653514E-4	0.1	-0.05173765408597542	-0.4221955891205421	0101010101
14853	0	1	0	1	1	0	0	1	0	1	2.685953534214934E-4	0.1	-0.30931838904099185	0.02344562359943257	0101010110
14852	0	0	1	1	1	1	0	1	0	1	3.0714664581918687E-4	0.1	0.34592530770266805	-0.32792674040718994	1101010101
14851	0	1	0	1	1	1	0	1	0	1	2.9764173512952E-4	0.1	0.20688067303612065	0.19052321977787323	1101010110
14850	0	0	0	0	1	0	1	0	0	0	6.863212969275507E-4	0.1	-0.1972196414179481	-0.0017353510600633527	0000001100
14849	0	0	1	0	1	0	1	0	0	0	6.703130669565509E-4	0.1	-0.08606677687029925	-0.22730227263546565	0000001101
14848	0	1	0	0	1	0	1	0	0	0	4.77866504104089E-4	0.1	-0.24915647440592828	-0.00617166363314656	0000001110
14847	0	0	0	0	1	0	1	1	0	0	8.665782326521607E-4	0.1	-0.19988283094615664	0.04594057437883303	0001001100
14845	0	0	0	0	1	1	1	0	0	0	0.0010432085675616308	0.1	0.4221045361229411	0.2128198038498155	1000001100
14844	0	0	1	0	1	1	1	0	0	0	9.43912602422972E-4	0.1	0.48977255029567757	-0.049060543015026666	1000001101
14843	0	1	0	0	1	1	1	0	0	0	6.789727007098037E-4	0.1	0.37428821444525445	0.20682426638291077	1000001110
14842	0	0	0	0	1	1	1	1	0	0	0.0018320052809505712	0.1	0.5339198652096092	0.3123720777864385	1001001100
14840	0	0	0	0	1	1	1	0	0	1	6.968372426058917E-4	0.1	0.3310866365632565	0.2373136199751354	1100001100
14834	1	0	1	1	0	0	1	1	0	0	4.8632608444486005E-4	0.1	0.005545609269677789	-0.42676072859901204	0001111001
14833	1	0	0	1	1	0	1	1	0	0	9.359656296648285E-4	0.1	-0.24287030141034335	0.10632250905354614	0001111100
14832	1	0	1	1	0	1	1	1	0	0	8.042217681983737E-4	0.1	0.5757012609544615	-0.29982609450051606	1001111001
14831	1	0	0	1	1	1	1	1	0	0	0.0017096736878502606	0.1	0.4722314995427111	0.3759343467047092	1001111100
14830	0	0	1	0	1	1	1	0	0	1	5.739453516251679E-4	0.1	0.39611568715047285	-0.004107664187321323	1100001101
14829	0	1	0	0	1	1	1	0	0	1	5.496093179774952E-4	0.1	0.3038466372853231	0.2847615952537315	1100001110
14828	0	0	0	0	1	1	1	1	0	1	8.623438925892457E-4	0.1	0.44037107830940675	0.34767375845036635	1101001100
14827	0	0	0	0	1	0	1	0	0	1	8.680208894912065E-4	0.1	-0.19400148666734282	0.06929559054077018	0100001100
14826	0	0	1	0	1	0	1	0	0	1	7.244954984893467E-4	0.1	-0.07585280089973966	-0.16775818288132116	0100001101
14825	0	1	0	0	1	0	1	0	0	1	6.694523993579458E-4	0.1	-0.22416372932899306	0.12674378060352398	0100001110
14824	0	0	0	0	1	0	1	1	0	1	9.348561368692621E-4	0.1	-0.17446743753153504	0.15719420708221943	0101001100
14823	1	0	1	1	0	1	1	1	0	1	5.4134663181145E-4	0.1	0.551281942263521	-0.3272878099347356	1101111001
14822	1	0	0	1	1	1	1	1	0	1	5.700017774222792E-4	0.1	0.38769256615864733	0.38932913766140465	1101111100
14821	1	0	1	1	0	0	1	1	0	1	3.0116188554591783E-4	0.1	0.037896400520773754	-0.4386963591868233	0101111001
14820	1	0	0	1	1	0	1	1	0	1	3.311400404407955E-4	0.1	-0.21846903330971673	0.15667084802540854	0101111100
14809	0	1	1	1	0	0	0	0	0	0	5.402398137882991E-4	0.1	-0.21761578643916019	-0.4196352590683137	0000010011
14808	0	1	1	1	0	1	0	0	0	0	6.434446544015022E-4	0.1	0.24991638468572744	-0.2712319050491617	1000010011
14807	1	1	1	0	0	0	0	1	0	0	5.809966750098953E-4	0.1	-0.24137194436373796	-0.5576014459100068	0001100011
14806	1	1	0	1	0	0	0	1	0	0	6.541153750490173E-4	0.1	-0.4970356568036199	0.231818947778417	0001110010
14799	1	1	1	0	0	1	0	1	0	0	1.4322940108456813E-4	0.1	0.2767789195776645	-0.32072666197337096	1001100011
14798	1	1	0	1	0	1	0	1	0	0	8.211627579282759E-4	0.1	0.059675540995056696	0.4719226367376387	1001110010
14796	1	0	1	1	1	1	0	0	0	0	8.934518626931483E-4	0.1	0.24756029987008119	-0.04601288336867688	1000110101
14791	0	1	1	1	0	0	0	0	0	1	4.1137009227701745E-4	0.1	-0.10995313976252562	-0.4859872368274977	0100010011
14790	1	0	1	1	1	0	0	0	0	0	7.549378960559608E-4	0.1	-0.20139504454916773	-0.20625173884971862	0000110101
14789	0	1	1	1	0	1	0	0	0	1	4.625178458365794E-4	0.1	0.25052469510637204	-0.3916884775338833	1100010011
14788	1	1	1	0	0	0	0	1	0	1	0.0010046428203827533	0.1	-0.21710169188839443	-0.5492298798743551	0101100011
14787	1	1	0	1	0	0	0	1	0	1	5.328570550851406E-4	0.1	-0.5100183982579792	0.2838047595616726	0101110010
14786	1	1	1	0	0	1	0	1	0	1	7.451270126405568E-4	0.1	0.2382560254683496	-0.40603818918869505	1101100011
14785	1	1	0	1	0	1	0	1	0	1	8.726595258512287E-4	0.1	0.002083606797937112	0.5274556594452426	1101110010
14779	1	0	1	1	1	0	0	0	0	1	8.843467781582766E-4	0.1	-0.17436165164221012	-0.15829728471907023	0100110101
14778	1	0	1	1	1	1	0	0	0	1	0.0013124506276506996	0.1	0.16616819137816055	-0.03998598279264223	1100110101
14762	0	0	1	0	1	0	1	1	0	0	8.174873749514251E-4	0.1	-0.1073871045762915	-0.18950349647775602	0001001101
14761	0	1	0	0	1	0	1	1	0	0	5.137459239371616E-4	0.1	-0.25651907852426836	0.07471475207901884	0001001110
14756	0	0	1	0	1	1	1	1	0	0	0.0016066524745969983	0.1	0.618209058345299	0.0364472257447459	1001001101
14755	0	1	0	0	1	1	1	1	0	0	0.0011320146148562475	0.1	0.47044190594172086	0.3393117908135262	1001001110
14753	0	0	1	0	1	1	1	1	0	1	6.95917993389517E-4	0.1	0.5099030280562065	0.05769298262642765	1101001101
14752	0	1	0	0	1	1	1	1	0	1	9.839297852074816E-4	0.1	0.3558434277458428	0.42147127764149594	1101001110
14751	1	0	0	0	1	1	1	1	0	1	3.5292536196350087E-4	0.1	0.3460812959721149	0.38556841329590313	1101101100
14750	0	0	1	0	1	0	1	1	0	1	7.559537936802581E-4	0.1	-0.046445403742246025	-0.11946851094245904	0101001101
14749	0	1	0	0	1	0	1	1	0	1	0.0011293908023270916	0.1	-0.18942257190121792	0.2764334033812959	0101001110
14748	1	0	0	0	1	0	1	1	0	1	8.660877364427274E-4	0.1	-0.14906763748309101	0.22851550290589379	0101101100
14745	0	1	1	1	0	1	0	1	0	0	5.726376995681886E-4	0.1	0.3193455725874792	-0.24406139414942105	1001010011
14744	0	1	1	1	0	0	0	1	0	0	4.4973805899691926E-4	0.1	-0.21872614866554324	-0.4085483450413968	0001010011
14738	1	0	1	1	1	0	0	1	0	0	8.619053791189979E-4	0.1	-0.28110210984167455	-0.1908516567194499	0001110101
14737	1	0	1	1	1	1	0	1	0	0	0.0012286785216167918	0.1	0.4491363777845294	0.06909957145784305	1001110101
14736	0	1	1	1	0	0	0	1	0	1	3.143819388909844E-4	0.1	-0.1337036135518258	-0.5140927557515462	0101010011
14735	0	1	1	1	0	1	0	1	0	1	3.3365278120476026E-4	0.1	0.28781268395678056	-0.3972053701669469	1101010011
14727	1	0	1	1	1	0	0	1	0	1	3.9653229826431234E-4	0.1	-0.2566527866741065	-0.17599080110135146	0101110101
14726	1	0	1	1	1	1	0	1	0	1	6.6129718928751E-4	0.1	0.3514666348288954	0.046464614551269844	1101110101
14725	0	1	1	0	0	0	1	0	0	0	3.3556520462304595E-4	0.1	-0.06794612885670524	-0.3098365555302207	0000001011
14724	0	1	1	0	0	1	1	0	0	0	5.755917086564481E-4	0.1	0.5236879908449065	-0.16159327939194498	1000001011
14723	0	1	1	0	0	1	1	0	0	1	4.0921968199131027E-4	0.1	0.5392986720747538	-0.18068118701927405	1100001011
14722	0	1	1	0	0	0	1	0	0	1	4.058406567573696E-4	0.1	0.018057624562543666	-0.35850657483152365	0100001011
14721	1	0	0	0	1	1	1	0	0	0	2.313454418080209E-4	0.1	0.06560586590190615	0.13688315973636597	1000101100
14720	1	0	1	0	1	1	1	0	0	0	2.1036496430326183E-4	0.1	0.1561614387937849	-0.04054742157860019	1000101101
14719	1	0	0	0	1	1	1	1	0	0	3.448643805202141E-4	0.1	0.11299742702300751	0.22837631807215802	1001101100
14717	1	0	0	0	1	1	1	0	0	1	2.424255626164111E-4	0.1	0.17969266351454694	0.20425738676277208	1100101100
14716	1	0	0	0	1	0	1	0	0	0	4.234045551679613E-4	0.1	-0.1160364098462639	0.10898207992407546	0000101100
14715	1	0	1	0	1	0	1	0	0	0	3.820546431718421E-4	0.1	1.6677500906073922E-4	-0.08361135233529167	0000101101
14714	1	0	0	0	1	0	1	1	0	0	8.565650887238712E-4	0.1	-0.11883314622044423	0.22156201171316856	0001101100
14710	1	0	0	0	1	0	1	0	0	1	3.997615558295461E-4	0.1	-0.15624331814858092	0.10997809587010031	0100101100
14709	1	0	1	0	1	0	1	0	0	1	4.255545621646358E-4	0.1	-0.0026967975223325296	-0.08050176439970885	0100101101
14708	1	0	1	0	1	1	1	0	0	1	2.839709411251738E-4	0.1	0.1840976723158982	-0.026808778402594203	1100101101
14699	1	1	1	1	0	0	0	0	0	0	2.2632625636972843E-4	0.1	-0.0775101494560733	-0.5706758778089618	0000110011
14698	1	1	1	1	0	1	0	0	0	0	2.6643196962221246E-4	0.1	0.2907621608643998	-0.4670252402301483	1000110011
14689	1	1	1	1	0	1	0	0	0	1	4.450159448485191E-4	0.1	0.2692493484869381	-0.5008403559272963	1100110011
14688	1	1	1	1	0	0	0	0	0	1	3.188798710323485E-4	0.1	-0.050771722852755406	-0.58236089044283	0100110011
14685	0	1	1	0	0	1	1	1	0	0	9.731435169090884E-4	0.1	0.5931916826259344	-0.14673775448290083	1001001011
14684	0	1	1	0	0	0	1	1	0	0	4.0150923327952366E-4	0.1	0.07705179527051394	-0.2710919366731722	0001001011
14683	1	0	1	0	1	0	1	1	0	0	6.33538439389446E-4	0.1	-0.04152727181958287	-0.06344005753950671	0001101101
14681	0	0	1	1	1	1	1	0	0	0	0.0012101582001641472	0.1	0.4645426880602134	-0.044201879045699444	1000011101
14680	0	1	0	1	1	1	1	0	0	0	0.0010800760888887472	0.1	0.33891596460911416	0.23777939102274234	1000011110
14679	0	0	1	1	1	0	1	0	0	0	7.533115665554148E-4	0.1	-0.026706457326658776	-0.21555270718368913	0000011101
14678	0	1	0	1	1	0	1	0	0	0	7.532762314141936E-4	0.1	-0.16881086635898102	0.05293422108402544	0000011110
14677	0	1	1	0	0	1	1	1	0	1	0.0010092955462375722	0.1	0.6228018920700084	-0.1775315752552478	1101001011
14676	1	1	0	0	0	1	1	1	0	1	9.333307504869757E-4	0.1	0.23016426879541607	0.6468657656379835	1101101010
14675	0	1	1	0	0	0	1	1	0	1	9.713924896886013E-4	0.1	0.049939719428117896	-0.37146749987649974	0101001011
14674	1	1	0	0	0	0	1	1	0	1	0.0015391314593256305	0.1	-0.2683142175486799	0.5487302432129854	0101101010
14673	1	0	1	0	1	1	1	1	0	0	1.8590129877175252E-4	0.1	0.3484959283965848	0.04911544666905473	1001101101
14669	0	0	1	1	1	0	1	0	0	1	0.001119636286219089	0.1	-0.025225924872163158	-0.17441048426442066	0100011101
14668	0	1	0	1	1	0	1	0	0	1	7.509009977905878E-4	0.1	-0.17164245209965234	0.11422740809696598	0100011110
14667	0	0	1	1	1	1	1	0	0	1	0.0012158889869368105	0.1	0.3515862121756698	-0.050306913904849926	1100011101
14666	0	1	0	1	1	1	1	0	0	1	8.119678616937877E-4	0.1	0.2559561881373855	0.2373731690632905	1100011110
14665	1	0	1	0	1	0	1	1	0	1	8.419661068009938E-4	0.1	-0.003148735733249087	-0.052283627597042553	0101101101
14664	1	0	1	0	1	1	1	1	0	1	4.0764842495251305E-4	0.1	0.3504899766245723	0.05626105449393441	1101101101
14663	0	1	1	0	1	1	0	0	0	0	0.001442349773073188	0.1	0.1597548670745662	-0.1629294918545163	1000000111
14662	1	1	0	0	1	1	0	0	0	0	0.001007772881448859	0.1	0.033523194519254035	0.05025225130575229	1000100110
14661	0	1	1	0	1	0	0	0	0	0	0.0012165642351927275	0.1	-0.3323650088281906	-0.3165420772583116	0000000111
14660	1	1	0	0	1	0	0	0	0	0	9.839803016510231E-4	0.1	-0.4492904891217307	-0.09103832102154322	0000100110
14649	1	1	1	1	0	1	0	1	0	0	6.07526168646745E-4	0.1	0.3666524543050483	-0.4348600687313026	1001110011
14648	0	1	1	0	1	0	0	0	0	1	8.262005236654793E-4	0.1	-0.2853995631637978	-0.26414155295523223	0100000111
14647	1	1	0	0	1	0	0	0	0	1	0.001043502055118139	0.1	-0.4358150863616198	-0.04375974807700491	0100100110
14646	1	1	1	1	0	0	0	1	0	0	4.6396807776878413E-4	0.1	-0.11656633141216993	-0.5560981734637748	0001110011
14645	0	1	1	0	1	1	0	0	0	1	8.809902850224343E-4	0.1	0.1074038123523175	-0.11441062633612384	1100000111
14644	1	1	0	0	1	1	0	0	0	1	0.0012846511184646237	0.1	0.0021058924371271485	0.11063011385382084	1100100110
14641	1	1	1	1	0	1	0	1	0	1	7.587184851904342E-4	0.1	0.33505265270413537	-0.4448882748650122	1101110011
14638	1	1	1	1	0	0	0	1	0	1	4.588201626061141E-4	0.1	-0.1266053868331212	-0.5609643853373718	0101110011
14633	1	1	0	0	0	0	1	0	0	0	3.1400626497746095E-4	0.1	-0.3232130793445951	0.31594941476040267	0000101010
14632	1	1	1	0	0	0	1	0	0	0	2.5270494492998953E-4	0.1	-0.00801685433747748	-0.3678401341574213	0000101011
14631	1	1	0	1	0	0	1	0	0	0	1.832931001852215E-4	0.1	-0.23553659203193014	0.2981306349364702	0000111010
14630	1	1	0	0	0	0	1	1	0	0	9.04907960161849E-4	0.1	-0.28882925546564187	0.5263895550793356	0001101010
14628	1	1	0	0	0	1	1	0	0	0	1.062612783358955E-4	0.1	0.11220960986063788	0.23432849204103148	1000101010
14627	1	1	1	0	0	1	1	0	0	0	8.605961401188535E-5	0.1	0.27978596204488304	-0.21560427019648346	1000101011
14626	1	1	0	1	0	1	1	0	0	0	2.2140353005829444E-4	0.1	0.17788060374214926	0.37357650624593536	1000111010
14625	1	1	0	0	0	1	1	1	0	0	1.3549639820334758E-4	0.1	0.15678080771893488	0.3037706263724065	1001101010
14623	1	1	0	0	0	1	1	0	0	1	2.68557851362254E-4	0.1	0.1433447113052956	0.3349650825480773	1100101010
14618	1	1	1	0	0	1	1	0	0	1	1.7376488996903282E-4	0.1	0.3653293341540105	-0.2681606423400697	1100101011
14617	1	1	0	1	0	1	1	0	0	1	3.703546296027099E-4	0.1	0.1515254406480882	0.37016146114102183	1100111010
14616	1	1	0	0	0	0	1	0	0	1	3.8316133279062896E-4	0.1	-0.31991309879350793	0.312735356205067	0100101010
14615	1	1	1	0	0	0	1	0	0	1	2.909562464479389E-4	0.1	-0.001099005219742135	-0.3689163559290513	0100101011
14614	1	1	0	1	0	0	1	0	0	1	2.456175786142867E-4	0.1	-0.26689121709396524	0.3159274687812617	0100111010
14607	0	0	1	1	1	0	1	1	0	0	9.370839850463298E-4	0.1	-0.09863194388716275	-0.19022624657290021	0001011101
14606	0	1	0	1	1	0	1	1	0	0	7.881468831136318E-4	0.1	-0.2065105435971908	0.096943049785574	0001011110
14605	0	0	1	1	1	1	1	1	0	0	0.0019947768396765737	0.1	0.6305517132344851	0.05461211606752435	1001011101
14604	0	1	0	1	1	1	1	1	0	0	0.0014445077031998116	0.1	0.47073835171983935	0.35392246212965556	1001011110
14596	0	0	1	1	1	0	1	1	0	1	5.045439515124528E-4	0.1	-0.006411668982987966	-0.16774600387613475	0101011101
14595	0	1	0	1	1	0	1	1	0	1	5.783024326548749E-4	0.1	-0.1602316111583	0.19677407895776178	0101011110
14594	0	0	1	1	1	1	1	1	0	1	5.103060392314176E-4	0.1	0.46234125637108864	-0.020921670521807347	1101011101
14593	0	1	0	1	1	1	1	1	0	1	5.975364517502869E-4	0.1	0.33949569012635333	0.3322622843342628	1101011110
14587	0	1	1	0	1	0	0	1	0	0	9.961761016080237E-4	0.1	-0.42262731970571693	-0.3191858426997156	0001000111
14586	1	1	0	0	1	0	0	1	0	0	8.79686865470645E-4	0.1	-0.556741688569592	-0.03244738082357518	0001100110
14585	0	1	1	0	1	1	0	1	0	0	0.0012056728216625692	0.1	0.2938567821483404	-0.10075929954444138	1001000111
14584	1	1	0	0	1	1	0	1	0	0	7.717787462470417E-4	0.1	0.17366839890966856	0.13966432090463488	1001100110
14581	0	1	1	0	1	1	0	1	0	1	3.4915853925877074E-4	0.1	0.2220270305959482	-0.05454263163022232	1101000111
14580	1	1	0	0	1	1	0	1	0	1	4.6415106376308845E-4	0.1	0.10909902810680748	0.26495394233769015	1101100110
14577	0	1	1	0	1	0	0	1	0	1	4.178828919636394E-4	0.1	-0.40375485238292397	-0.2984244574648953	0101000111
14576	1	1	0	0	1	0	0	1	0	1	5.473806153964321E-4	0.1	-0.5473235110476209	0.0013076349161948767	0101100110
14571	0	1	1	1	0	0	1	0	0	0	3.022705521088986E-4	0.1	-0.011220829021027032	-0.3279121817423912	0000011011
14570	0	1	1	1	0	1	1	0	0	0	4.0864100715127876E-4	0.1	0.49582410011860895	-0.19247368415906407	1000011011
14569	1	1	1	0	0	0	1	1	0	0	7.753045516044949E-4	0.1	0.022932385528205482	-0.36316185962165676	0001101011
14568	1	1	0	1	0	0	1	1	0	0	3.9193149807157534E-4	0.1	-0.24000602286545805	0.45146303477198113	0001111010
14566	1	1	1	0	0	1	1	1	0	0	1.1246453241884576E-4	0.1	0.3138815226330661	-0.1513681079755618	1001101011
14565	1	1	0	1	0	1	1	1	0	0	4.936198406940341E-4	0.1	0.3017086444908594	0.5674036635337564	1001111010
14561	1	0	1	1	1	1	1	0	0	0	9.005259091629112E-4	0.1	0.3721192139332856	-0.020964666937825508	1000111101
14560	1	0	1	1	1	0	1	0	0	0	6.317712891171194E-4	0.1	-0.08614087742538955	-0.18406198056956408	0000111101
14557	0	1	1	1	0	0	1	0	0	1	4.0528718563733585E-4	0.1	0.08928647807421147	-0.4122251547516871	0100011011
14556	1	1	1	0	0	1	1	1	0	1	6.791685685506325E-4	0.1	0.6275102277522808	-0.1826384173728862	1101101011
14555	1	1	0	1	0	1	1	1	0	1	8.636807921712944E-4	0.1	0.28362234787838236	0.5938556663023973	1101111010
14554	0	1	1	1	0	1	1	0	0	1	4.0336953726121083E-4	0.1	0.46114914494045345	-0.3075620497672183	1100011011
14553	1	1	1	0	0	0	1	1	0	1	0.001308478500942922	0.1	0.03633101617141974	-0.37257943972876184	0101101011
14552	1	1	0	1	0	0	1	1	0	1	5.019831507887556E-4	0.1	-0.2474899167110652	0.48750732505991085	0101111010
14551	1	0	1	1	1	0	1	0	0	1	9.277766222982909E-4	0.1	-0.07114887168301154	-0.15514448281680465	0100111101
14550	1	0	1	1	1	1	1	0	0	1	0.0012107675953842562	0.1	0.2650426073388964	-0.03793917312503986	1100111101
14545	1	1	1	0	1	1	0	0	0	0	7.974714572868825E-4	0.1	0.09329540476159891	-0.12468143153274579	1000100111
14544	1	1	0	1	1	1	0	0	0	0	7.308438991976947E-4	0.1	0.0834588891009492	0.18714133129169966	1000110110
14543	1	1	1	0	1	0	0	0	0	0	7.71790186731068E-4	0.1	-0.34606199926875436	-0.2654613597643597	0000100111
14542	1	1	0	1	1	0	0	0	0	0	6.934844899247709E-4	0.1	-0.3888794922305332	0.015499598784266455	0000110110
14533	1	1	1	0	1	0	0	0	0	1	7.306367909294464E-4	0.1	-0.3009685211744953	-0.2161413262686083	0100100111
14532	1	1	0	1	1	0	0	0	0	1	7.303547182903938E-4	0.1	-0.3946655314258838	0.05676745765897727	0100110110
14530	1	1	1	0	1	1	0	0	0	1	9.097199779346811E-4	0.1	0.06721695723026781	-0.08328978750544996	1100100111
14529	1	1	0	1	1	1	0	0	0	1	9.860901287576567E-4	0.1	0.024860278110354635	0.1860307534403201	1100110110
14515	0	1	1	1	0	0	1	1	0	0	2.832477123553982E-4	0.1	6.543575835638106E-4	-0.3060113211825194	0001011011
14514	0	1	1	1	0	1	1	1	0	0	4.7892023740374556E-4	0.1	0.6187208949064954	-0.14135442189753375	1001011011
14511	1	0	1	1	1	0	1	1	0	0	9.284364480485155E-4	0.1	-0.15234394240298177	-0.16457693276877863	0001111101
14510	1	0	1	1	1	1	1	1	0	0	0.001646407810705593	0.1	0.5826424058615404	0.08781980859998999	1001111101
14509	0	1	1	1	0	1	1	1	0	1	4.149268712719396E-4	0.1	0.5474032521439948	-0.26912223588207074	1101011011
14508	0	1	1	1	0	0	1	1	0	1	4.43921468746443E-4	0.1	0.09138727087395844	-0.4045123022975201	0101011011
14507	1	0	1	1	1	1	1	1	0	1	5.415154457984634E-4	0.1	0.5007722603396925	0.08031591179108978	1101111101
14506	1	0	1	1	1	0	1	1	0	1	3.200305170292499E-4	0.1	-0.108726691601409	-0.13421781598935117	0101111101
14505	1	1	1	0	1	0	0	1	0	0	7.07142753267743E-4	0.1	-0.46102414773190115	-0.2759629526330915	0001100111
14504	1	1	0	1	1	0	0	1	0	0	7.389235686399058E-4	0.1	-0.447431008708769	0.09573705079591437	0001110110
14503	0	1	1	1	1	1	0	0	0	0	0.0010319428245270333	0.1	0.22740399911872194	-0.19105440845017457	1000010111
14502	0	1	1	1	1	0	0	0	0	0	8.775922794853561E-4	0.1	-0.23357054501203867	-0.34445443241441853	0000010111
14501	1	1	1	0	1	1	0	1	0	0	6.619174528573542E-4	0.1	0.2494688749500781	-0.046665021103514705	1001100111
14500	1	1	0	1	1	1	0	1	0	0	8.38112667068044E-4	0.1	0.1824483079635733	0.3274397625604336	1001110110
14496	1	1	1	0	1	1	0	1	0	1	4.2768053398579595E-4	0.1	0.2133458411690444	-0.0274193543020536	1101100111
14495	1	1	0	1	1	1	0	1	0	1	5.426092801208653E-4	0.1	0.12385543533485309	0.33487392992156134	1101110110
14493	0	1	1	1	1	0	0	0	0	1	5.041040797962232E-4	0.1	-0.1636549651478464	-0.3078803339193437	0100010111
14492	0	1	1	1	1	1	0	0	0	1	5.449969008246162E-4	0.1	0.2174330799849339	-0.19909014727416763	1100010111
14491	1	1	1	0	1	0	0	1	0	1	4.531158425069728E-4	0.1	-0.42945979544134283	-0.2651746895485215	0101100111
14490	1	1	0	1	1	0	0	1	0	1	3.8121073224980836E-4	0.1	-0.4342627473252822	0.12771608576114613	0101110110
14485	1	1	1	1	0	1	1	0	0	0	1.9718904103944114E-4	0.1	0.43110296894261496	-0.28016333730909465	1000111011
14484	1	1	0	1	1	1	1	0	0	0	2.578391882516938E-4	0.1	0.24869663021477267	0.25621764655086277	1000111110
14483	1	1	1	1	0	0	1	0	0	0	1.6136846521344985E-4	0.1	0.059305224869998764	-0.3735773136704255	0000111011
14482	1	1	0	1	1	0	1	0	0	0	2.0236927009051344E-4	0.1	-0.17543078309983406	0.12935647924455373	0000111110
14477	1	1	1	1	0	1	1	0	0	1	2.865839277662009E-4	0.1	0.40959676522171234	-0.29664093225647875	1100111011
14476	1	1	0	1	1	1	1	0	0	1	3.3705591494218615E-4	0.1	0.20966285518396513	0.2436928088540394	1100111110
14475	1	1	1	1	0	0	1	0	0	1	2.0363173516034576E-4	0.1	0.05856777142018128	-0.38988096410536205	0100111011
14474	1	1	0	1	1	0	1	0	0	1	2.450094197049022E-4	0.1	-0.19625645390591678	0.13771624575508679	0100111110
14457	0	1	1	1	1	0	0	1	0	0	7.447106947848055E-4	0.1	-0.2714911667984514	-0.31980988179512565	0001010111
14456	0	1	1	1	1	1	0	1	0	0	9.469996486616623E-4	0.1	0.3400207342720738	-0.11888035325740154	1001010111
14455	0	1	1	1	1	1	0	1	0	1	2.9236663898191036E-4	0.1	0.283724038932469	-0.14557470691623184	1101010111
14454	0	1	1	1	1	0	0	1	0	1	2.540731433663829E-4	0.1	-0.20817880401000588	-0.2920792811867225	0101010111
14453	0	1	1	0	1	0	1	0	0	0	5.187559560982715E-4	0.1	-0.1435475986737253	-0.2389342248471828	0000001111
14452	0	1	1	0	1	1	1	0	0	0	7.103601421667059E-4	0.1	0.4768030979295379	-0.06478604524489769	1000001111
14451	0	1	1	0	1	1	1	0	0	1	4.70244152336432E-4	0.1	0.3898019782107007	0.00575257993560103	1100001111
14450	0	1	1	0	1	0	1	0	0	1	5.678555923397031E-4	0.1	-0.08608555429821244	-0.1536246259303912	0100001111
14449	1	1	1	1	0	0	1	1	0	0	3.318151002834804E-4	0.1	0.07144772260973288	-0.3541104222926824	0001111011
14448	1	1	0	1	1	0	1	1	0	0	3.722620546769705E-4	0.1	-0.18021350954472834	0.23731854183586437	0001111110
14447	1	1	1	1	0	1	1	1	0	0	4.2608562122423876E-4	0.1	0.5888452062901243	-0.2046500551643621	1001111011
14446	1	1	0	1	1	1	1	1	0	0	4.945690913107629E-4	0.1	0.3966727420710327	0.4265504880996768	1001111110
14443	1	1	1	1	0	0	1	1	0	1	4.095372298611647E-4	0.1	0.08271137870790761	-0.37228583072903226	0101111011
14439	0	1	1	1	1	1	0	1	1	1					1111010111
14438	0	1	1	1	1	0	0	1	1	1					0111010111
14437	0	1	1	0	1	0	1	0	1	0					0010001111
14436	0	1	1	0	1	1	1	0	1	0					1010001111
14433	1	1	1	1	0	0	1	1	1	0					0011111011
14432	1	1	0	1	1	0	1	1	1	0					0011111110
14431	0	1	1	0	1	1	1	0	1	1					1110001111
14430	0	1	1	0	1	0	1	0	1	1					0110001111
14429	1	1	1	1	0	1	1	1	1	0					1011111011
14428	1	1	0	1	1	1	1	1	1	0					1011111110
14427	1	1	1	1	0	0	1	1	1	1					0111111011
14426	1	1	0	1	1	0	1	1	1	1					0111111110
14424	1	1	1	1	0	1	1	1	1	1					1111111011
14423	1	1	0	1	1	1	1	1	1	1					1111111110
14421	1	1	1	1	1	0	0	0	1	0					0010110111
14420	1	1	1	1	1	1	0	0	1	0					1010110111
14413	1	1	1	1	1	0	0	0	1	1					0110110111
14412	1	1	1	1	1	1	0	0	1	1					1110110111
14411	0	1	1	0	1	0	1	1	1	0					0011001111
14410	0	1	1	0	1	1	1	1	1	0					1011001111
14407	0	1	1	0	1	1	1	1	1	1					1111001111
14406	1	1	0	0	1	1	1	1	1	1					1111101110
14405	0	1	1	0	1	0	1	1	1	1					0111001111
14404	1	1	0	0	1	0	1	1	1	1					0111101110
14398	1	1	0	0	1	0	1	0	1	0					0010101110
14394	1	1	0	0	1	1	1	0	1	0					1010101110
14389	1	1	1	1	1	0	0	1	1	0					0011110111
14388	1	1	1	1	1	1	0	1	1	0					1011110111
14387	1	1	1	1	1	1	0	1	1	1					1111110111
14386	1	1	1	1	1	0	0	1	1	1					0111110111
14385	1	1	1	0	1	0	1	0	1	0					0010101111
14384	1	1	1	0	1	1	1	0	1	0					1010101111
14383	1	1	0	0	1	1	1	0	1	1					1110101110
14382	1	1	1	0	1	1	1	0	1	1					1110101111
14381	1	1	0	0	1	0	1	0	1	1					0110101110
14380	1	1	1	0	1	0	1	0	1	1					0110101111
14376	1	1	0	0	1	1	1	1	1	0					1011101110
14374	1	1	0	0	1	0	1	1	1	0					0011101110
14369	0	1	1	1	1	0	1	0	1	0					0010011111
14368	0	1	1	1	1	1	1	0	1	0					1010011111
14367	1	1	1	0	1	0	1	1	1	0					0011101111
14366	1	1	1	0	1	1	1	1	1	0					1011101111
14365	0	1	1	1	1	1	1	0	1	1					1110011111
14364	0	1	1	1	1	0	1	0	1	1					0110011111
14363	1	1	1	0	1	1	1	1	1	1					1111101111
14362	1	1	1	0	1	0	1	1	1	1					0111101111
14357	0	1	1	1	1	0	1	1	1	0					0011011111
14356	0	1	1	1	1	1	1	1	1	0					1011011111
14355	0	1	1	1	1	0	1	1	1	1					0111011111
14354	0	1	1	1	1	1	1	1	1	1					1111011111
14349	1	1	1	1	1	0	1	0	1	0					0010111111
14348	1	1	1	1	1	1	1	0	1	0					1010111111
14347	1	1	1	1	1	1	1	0	1	1					1110111111
14346	1	1	1	1	1	0	1	0	1	1					0110111111
14341	1	1	1	1	1	0	1	1	1	0					0011111111
14340	1	1	1	1	1	1	1	1	1	0					1011111111
14339	1	1	1	1	1	1	1	1	1	1					1111111111
14338	1	1	1	1	1	0	1	1	1	1					0111111111
15345	0	0	0	0	0	1	0	0	1	0					1010000000
15344	0	0	1	0	0	1	0	0	1	0					1010000001
15343	0	1	0	0	0	1	0	0	1	0					1010000010
15342	0	0	0	0	0	1	0	0	1	1					1110000000
15341	0	0	0	0	0	0	0	0	1	0					0010000000
15340	0	0	1	0	0	0	0	0	1	0					0010000001
15339	0	1	0	0	0	0	0	0	1	0					0010000010
15338	0	0	1	0	0	1	0	0	1	1					1110000001
15337	0	1	0	0	0	1	0	0	1	1					1110000010
15336	0	0	0	0	0	0	0	0	1	1					0110000000
15335	0	0	1	0	0	0	0	0	1	1					0110000001
15334	0	1	0	0	0	0	0	0	1	1					0110000010
15323	0	0	0	0	0	0	0	1	1	0					0011000000
15322	0	0	1	0	0	0	0	1	1	0					0011000001
15321	0	1	0	0	0	0	0	1	1	0					0011000010
15320	0	0	0	0	0	1	0	1	1	0					1011000000
15319	0	0	1	0	0	1	0	1	1	0					1011000001
15318	0	1	0	0	0	1	0	1	1	0					1011000010
15317	0	0	0	0	0	1	0	1	1	1					1111000000
15316	0	0	1	0	0	1	0	1	1	1					1111000001
15315	0	1	0	0	0	1	0	1	1	1					1111000010
15314	1	0	0	0	0	1	0	1	1	1					1111100000
15313	0	0	0	0	0	0	0	1	1	1					0111000000
15312	0	0	1	0	0	0	0	1	1	1					0111000001
15311	0	1	0	0	0	0	0	1	1	1					0111000010
15310	1	0	0	0	0	0	0	1	1	1					0111100000
15305	1	0	0	0	0	1	0	0	1	0					1010100000
15299	1	0	0	0	0	0	0	0	1	0					0010100000
15293	1	0	1	0	0	0	0	0	1	0					0010100001
15292	1	0	0	1	0	0	0	0	1	0					0010110000
15291	1	0	1	0	0	1	0	0	1	0					1010100001
15290	1	0	0	1	0	1	0	0	1	0					1010110000
15289	1	0	0	0	0	1	0	0	1	1					1110100000
15288	1	0	1	0	0	1	0	0	1	1					1110100001
15287	1	0	0	1	0	1	0	0	1	1					1110110000
15286	1	0	0	0	0	0	0	0	1	1					0110100000
15285	1	0	1	0	0	0	0	0	1	1					0110100001
15284	1	0	0	1	0	0	0	0	1	1					0110110000
15281	1	0	0	0	0	0	0	1	1	0					0011100000
15278	1	0	0	0	0	1	0	1	1	0					1011100000
15253	1	0	1	0	0	0	0	1	1	0					0011100001
15252	1	0	0	1	0	0	0	1	1	0					0011110000
15251	1	0	1	0	0	1	0	1	1	0					1011100001
15250	1	0	0	1	0	1	0	1	1	0					1011110000
15249	0	0	0	1	0	1	0	0	1	0					1010010000
15248	0	0	1	1	0	1	0	0	1	0					1010010001
15247	0	1	0	1	0	1	0	0	1	0					1010010010
15246	0	0	0	1	0	1	1	0	1	0					1010011000
15245	0	0	0	1	0	0	0	0	1	0					0010010000
15244	0	0	1	1	0	0	0	0	1	0					0010010001
15243	0	1	0	1	0	0	0	0	1	0					0010010010
15242	0	0	0	1	0	0	1	0	1	0					0010011000
15241	1	0	1	0	0	1	0	1	1	1					1111100001
15240	1	0	0	1	0	1	0	1	1	1					1111110000
15239	1	0	1	0	0	0	0	1	1	1					0111100001
15238	1	0	0	1	0	0	0	1	1	1					0111110000
15237	0	0	0	1	0	0	0	0	1	1					0110010000
15236	0	0	1	1	0	0	0	0	1	1					0110010001
15235	0	1	0	1	0	0	0	0	1	1					0110010010
15234	0	0	0	1	0	0	1	0	1	1					0110011000
15233	0	0	0	1	0	1	0	0	1	1					1110010000
15232	0	0	1	1	0	1	0	0	1	1					1110010001
15231	0	1	0	1	0	1	0	0	1	1					1110010010
15230	0	0	0	1	0	1	1	0	1	1					1110011000
15201	0	0	0	1	0	0	0	1	1	0					0011010000
15200	0	0	1	1	0	0	0	1	1	0					0011010001
15199	0	1	0	1	0	0	0	1	1	0					0011010010
15198	0	0	0	1	0	0	1	1	1	0					0011011000
15197	0	0	0	1	0	1	0	1	1	0					1011010000
15196	0	0	1	1	0	1	0	1	1	0					1011010001
15195	0	1	0	1	0	1	0	1	1	0					1011010010
15194	0	0	0	1	0	1	1	1	1	0					1011011000
15193	0	0	0	1	0	0	0	1	1	1					0111010000
15192	0	0	1	1	0	0	0	1	1	1					0111010001
15191	0	1	0	1	0	0	0	1	1	1					0111010010
15190	0	0	0	1	0	0	1	1	1	1					0111011000
15189	0	0	0	1	0	1	0	1	1	1					1111010000
15188	0	0	1	1	0	1	0	1	1	1					1111010001
15187	0	1	0	1	0	1	0	1	1	1					1111010010
15186	0	0	0	1	0	1	1	1	1	1					1111011000
15185	0	0	0	0	0	1	1	0	1	0					1010001000
15184	0	0	1	0	0	1	1	0	1	0					1010001001
15183	0	1	0	0	0	1	1	0	1	0					1010001010
15182	0	0	0	0	0	1	1	0	1	1					1110001000
15181	0	0	0	0	0	0	1	0	1	0					0010001000
15180	0	0	1	0	0	0	1	0	1	0					0010001001
15179	0	1	0	0	0	0	1	0	1	0					0010001010
15174	0	0	1	0	0	1	1	0	1	1					1110001001
15173	0	1	0	0	0	1	1	0	1	1					1110001010
15172	0	0	0	0	0	0	1	0	1	1					0110001000
15171	0	0	1	0	0	0	1	0	1	1					0110001001
15170	0	1	0	0	0	0	1	0	1	1					0110001010
15165	1	0	1	1	0	0	0	0	1	0					0010110001
15164	1	0	0	1	0	0	1	0	1	0					0010111000
15163	1	0	1	1	0	1	0	0	1	0					1010110001
15162	1	0	0	1	0	1	1	0	1	0					1010111000
15157	1	0	1	1	0	1	0	0	1	1					1110110001
15156	1	0	0	1	0	1	1	0	1	1					1110111000
15155	1	0	1	1	0	0	0	0	1	1					0110110001
15154	1	0	0	1	0	0	1	0	1	1					0110111000
15142	0	0	0	0	1	0	0	0	1	0					0010000100
15136	0	0	0	0	1	1	0	0	1	0					1010000100
15134	0	0	0	0	0	0	1	1	1	0					0011001000
15133	0	0	1	0	0	0	1	1	1	0					0011001001
15132	0	1	0	0	0	0	1	1	1	0					0011001010
15131	0	0	0	0	0	1	1	1	1	0					1011001000
15130	0	0	1	0	0	1	1	1	1	0					1011001001
15129	0	1	0	0	0	1	1	1	1	0					1011001010
15128	0	0	0	0	0	1	1	1	1	1					1111001000
15114	0	0	1	0	0	1	1	1	1	1					1111001001
15113	0	1	0	0	0	1	1	1	1	1					1111001010
15112	1	0	0	0	0	1	1	1	1	1					1111101000
15111	0	0	0	0	0	0	1	1	1	1					0111001000
15110	0	0	1	0	0	0	1	1	1	1					0111001001
15109	0	1	0	0	0	0	1	1	1	1					0111001010
15108	1	0	0	0	0	0	1	1	1	1					0111101000
15100	1	0	0	0	0	0	1	0	1	0					0010101000
15096	1	0	0	0	0	1	1	0	1	0					1010101000
15094	0	0	1	0	1	1	0	0	1	0					1010000101
15093	0	1	0	0	1	1	0	0	1	0					1010000110
15092	1	0	0	0	1	1	0	0	1	0					1010100100
15091	0	0	0	0	1	1	0	0	1	1					1110000100
15090	0	0	1	0	1	0	0	0	1	0					0010000101
15089	0	1	0	0	1	0	0	0	1	0					0010000110
15088	1	0	0	0	1	0	0	0	1	0					0010100100
15084	1	0	1	1	0	0	0	1	1	0					0011110001
15083	1	0	0	1	0	0	1	1	1	0					0011111000
15082	1	0	1	1	0	1	0	1	1	0					1011110001
15081	1	0	0	1	0	1	1	1	1	0					1011111000
15080	0	0	1	0	1	1	0	0	1	1					1110000101
15079	0	1	0	0	1	1	0	0	1	1					1110000110
15078	1	0	0	0	1	1	0	0	1	1					1110100100
15077	0	0	0	0	1	0	0	0	1	1					0110000100
15076	0	0	1	0	1	0	0	0	1	1					0110000101
15075	0	1	0	0	1	0	0	0	1	1					0110000110
15074	1	0	0	0	1	0	0	0	1	1					0110100100
15073	1	0	1	1	0	1	0	1	1	1					1111110001
15072	1	0	0	1	0	1	1	1	1	1					1111111000
15071	1	0	1	1	0	0	0	1	1	1					0111110001
15070	1	0	0	1	0	0	1	1	1	1					0111111000
15069	1	0	1	0	0	0	1	0	1	0					0010101001
15068	1	0	1	0	0	1	1	0	1	0					1010101001
15067	1	0	0	0	0	1	1	0	1	1					1110101000
15066	1	0	1	0	0	1	1	0	1	1					1110101001
15065	1	0	0	0	0	0	1	0	1	1					0110101000
15064	1	0	1	0	0	0	1	0	1	1					0110101001
15060	0	0	0	0	1	0	0	1	1	0					0011000100
15056	0	0	0	0	1	1	0	1	1	0					1011000100
15048	1	0	0	0	0	0	1	1	1	0					0011101000
15046	1	0	0	0	0	1	1	1	1	0					1011101000
15039	0	0	1	0	1	0	0	1	1	0					0011000101
15038	0	1	0	0	1	0	0	1	1	0					0011000110
15037	1	0	0	0	1	0	0	1	1	0					0011100100
15034	0	0	1	0	1	1	0	1	1	0					1011000101
15033	0	1	0	0	1	1	0	1	1	0					1011000110
15032	1	0	0	0	1	1	0	1	1	0					1011100100
15031	0	0	0	0	1	1	0	1	1	1					1111000100
15024	0	0	1	0	1	1	0	1	1	1					1111000101
15023	0	1	0	0	1	1	0	1	1	1					1111000110
15022	1	0	0	0	1	1	0	1	1	1					1111100100
15021	0	0	0	0	1	0	0	1	1	1					0111000100
15020	0	0	1	0	1	0	0	1	1	1					0111000101
15019	0	1	0	0	1	0	0	1	1	1					0111000110
15018	1	0	0	0	1	0	0	1	1	1					0111100100
15009	1	0	1	0	0	0	1	1	1	0					0011101001
15008	1	0	1	0	0	1	1	1	1	0					1011101001
15007	0	0	1	1	0	0	1	0	1	0					0010011001
15006	0	1	0	1	0	0	1	0	1	0					0010011010
15005	0	0	0	1	1	0	1	0	1	0					0010011100
15004	0	0	1	1	0	1	1	0	1	0					1010011001
15003	0	1	0	1	0	1	1	0	1	0					1010011010
15002	0	0	0	1	1	1	1	0	1	0					1010011100
14999	0	0	1	1	0	1	1	0	1	1					1110011001
14998	0	1	0	1	0	1	1	0	1	1					1110011010
14997	0	0	0	1	1	1	1	0	1	1					1110011100
14994	0	0	1	1	0	0	1	0	1	1					0110011001
14993	0	1	0	1	0	0	1	0	1	1					0110011010
14992	0	0	0	1	1	0	1	0	1	1					0110011100
14991	1	0	1	0	0	1	1	1	1	1					1111101001
14990	1	0	1	0	0	0	1	1	1	1					0111101001
14989	0	1	1	0	0	0	0	0	1	0					0010000011
14988	0	1	1	0	0	1	0	0	1	0					1010000011
14987	1	0	1	0	1	0	0	0	1	0					0010100101
14986	1	0	0	1	1	0	0	0	1	0					0010110100
14985	0	1	1	0	0	1	0	0	1	1					1110000011
14984	1	0	1	0	1	1	0	0	1	0					1010100101
14983	1	0	0	1	1	1	0	0	1	0					1010110100
14982	0	1	1	0	0	0	0	0	1	1					0110000011
14981	1	0	1	0	1	1	0	0	1	1					1110100101
14980	1	0	0	1	1	1	0	0	1	1					1110110100
14979	1	0	1	0	1	0	0	0	1	1					0110100101
14978	1	0	0	1	1	0	0	0	1	1					0110110100
14951	0	0	0	1	1	0	0	0	1	0					0010010100
14949	0	0	1	1	0	0	1	1	1	0					0011011001
14948	0	1	0	1	0	0	1	1	1	0					0011011010
14947	0	0	0	1	1	0	1	1	1	0					0011011100
14946	0	0	1	1	0	1	1	1	1	0					1011011001
14945	0	1	0	1	0	1	1	1	1	0					1011011010
14944	0	0	0	1	1	1	1	1	1	0					1011011100
14940	0	0	0	1	1	1	0	0	1	0					1010010100
14927	0	0	1	1	0	1	1	1	1	1					1111011001
14926	0	1	0	1	0	1	1	1	1	1					1111011010
14925	0	0	0	1	1	1	1	1	1	1					1111011100
14924	0	0	1	1	0	0	1	1	1	1					0111011001
14923	0	1	0	1	0	0	1	1	1	1					0111011010
14922	0	0	0	1	1	0	1	1	1	1					0111011100
14921	0	1	1	0	0	0	0	1	1	0					0011000011
14918	0	1	1	0	0	1	0	1	1	0					1011000011
14915	0	1	1	0	0	1	0	1	1	1					1111000011
14914	1	1	0	0	0	1	0	1	1	1					1111100010
14911	1	0	1	0	1	0	0	1	1	0					0011100101
14910	1	0	0	1	1	0	0	1	1	0					0011110100
14909	1	0	1	0	1	1	0	1	1	0					1011100101
14908	1	0	0	1	1	1	0	1	1	0					1011110100
14905	0	1	1	0	0	0	0	1	1	1					0111000011
14904	1	1	0	0	0	0	0	1	1	1					0111100010
14903	0	0	1	1	1	1	0	0	1	0					1010010101
14902	0	1	0	1	1	1	0	0	1	0					1010010110
14901	0	0	1	1	1	0	0	0	1	0					0010010101
14900	0	1	0	1	1	0	0	0	1	0					0010010110
14899	1	0	1	0	1	1	0	1	1	1					1111100101
14898	1	0	0	1	1	1	0	1	1	1					1111110100
14897	1	0	1	0	1	0	0	1	1	1					0111100101
14896	1	0	0	1	1	0	0	1	1	1					0111110100
14895	0	0	0	1	1	0	0	0	1	1					0110010100
14894	0	0	1	1	1	0	0	0	1	1					0110010101
14893	0	1	0	1	1	0	0	0	1	1					0110010110
14892	0	0	0	1	1	1	0	0	1	1					1110010100
14891	0	0	1	1	1	1	0	0	1	1					1110010101
14890	0	1	0	1	1	1	0	0	1	1					1110010110
14885	1	1	0	0	0	0	0	0	1	0					0010100010
14880	1	1	0	0	0	1	0	0	1	0					1010100010
14878	1	0	1	1	0	0	1	0	1	0					0010111001
14877	1	0	0	1	1	0	1	0	1	0					0010111100
14876	1	0	1	1	0	1	1	0	1	0					1010111001
14875	1	0	0	1	1	1	1	0	1	0					1010111100
14869	1	0	1	1	0	1	1	0	1	1					1110111001
14868	1	0	0	1	1	1	1	0	1	1					1110111100
14867	1	0	1	1	0	0	1	0	1	1					0110111001
14866	1	0	0	1	1	0	1	0	1	1					0110111100
14863	0	0	0	1	1	1	0	1	1	0					1011010100
14860	0	0	0	1	1	0	0	1	1	0					0011010100
14859	1	1	1	0	0	0	0	0	1	0					0010100011
14858	1	1	0	1	0	0	0	0	1	0					0010110010
14857	1	1	1	0	0	1	0	0	1	0					1010100011
14856	1	1	0	1	0	1	0	0	1	0					1010110010
14855	1	1	0	0	0	1	0	0	1	1					1110100010
14846	0	0	0	0	1	0	1	0	1	0					0010001100
14841	0	0	0	0	1	1	1	0	1	0					1010001100
14839	1	1	1	0	0	1	0	0	1	1					1110100011
14838	1	1	0	1	0	1	0	0	1	1					1110110010
14837	1	1	0	0	0	0	0	0	1	1					0110100010
14836	1	1	1	0	0	0	0	0	1	1					0110100011
14835	1	1	0	1	0	0	0	0	1	1					0110110010
14819	0	0	1	1	1	1	0	1	1	0					1011010101
14818	0	1	0	1	1	1	0	1	1	0					1011010110
14817	0	0	1	1	1	0	0	1	1	0					0011010101
14816	0	1	0	1	1	0	0	1	1	0					0011010110
14815	0	0	0	1	1	0	0	1	1	1					0111010100
14814	0	0	1	1	1	0	0	1	1	1					0111010101
14813	0	1	0	1	1	0	0	1	1	1					0111010110
14812	0	0	0	1	1	1	0	1	1	1					1111010100
14811	0	0	1	1	1	1	0	1	1	1					1111010101
14810	0	1	0	1	1	1	0	1	1	1					1111010110
14805	1	1	0	0	0	0	0	1	1	0					0011100010
14804	0	0	1	0	1	1	1	0	1	0					1010001101
14803	0	1	0	0	1	1	1	0	1	0					1010001110
14802	0	0	0	0	1	1	1	0	1	1					1110001100
14801	0	0	1	0	1	0	1	0	1	0					0010001101
14800	0	1	0	0	1	0	1	0	1	0					0010001110
14797	1	1	0	0	0	1	0	1	1	0					1011100010
14795	1	0	1	1	0	0	1	1	1	0					0011111001
14794	1	0	0	1	1	0	1	1	1	0					0011111100
14793	1	0	1	1	0	1	1	1	1	0					1011111001
14792	1	0	0	1	1	1	1	1	1	0					1011111100
14784	0	0	1	0	1	1	1	0	1	1					1110001101
14783	0	1	0	0	1	1	1	0	1	1					1110001110
14782	0	0	0	0	1	0	1	0	1	1					0110001100
14781	0	0	1	0	1	0	1	0	1	1					0110001101
14780	0	1	0	0	1	0	1	0	1	1					0110001110
14777	1	0	1	1	0	0	1	1	1	1					0111111001
14776	1	0	0	1	1	0	1	1	1	1					0111111100
14775	1	0	1	1	0	1	1	1	1	1					1111111001
14774	1	0	0	1	1	1	1	1	1	1					1111111100
14773	0	1	1	1	0	1	0	0	1	0					1010010011
14772	0	1	1	1	0	0	0	0	1	0					0010010011
14771	1	1	1	0	0	0	0	1	1	0					0011100011
14770	1	1	0	1	0	0	0	1	1	0					0011110010
14769	1	1	1	0	0	1	0	1	1	0					1011100011
14768	1	1	0	1	0	1	0	1	1	0					1011110010
14767	1	0	1	1	1	1	0	0	1	0					1010110101
14766	1	0	1	1	1	0	0	0	1	0					0010110101
14765	1	1	1	0	0	1	0	1	1	1					1111100011
14764	1	1	0	1	0	1	0	1	1	1					1111110010
14763	0	1	1	1	0	1	0	0	1	1					1110010011
14760	0	0	0	0	1	0	1	1	1	0					0011001100
14759	0	1	1	1	0	0	0	0	1	1					0110010011
14758	1	1	1	0	0	0	0	1	1	1					0111100011
14757	1	1	0	1	0	0	0	1	1	1					0111110010
14754	0	0	0	0	1	1	1	1	1	0					1011001100
14747	1	0	1	1	1	0	0	0	1	1					0110110101
14746	1	0	1	1	1	1	0	0	1	1					1110110101
14743	0	0	1	0	1	1	1	1	1	0					1011001101
14742	0	1	0	0	1	1	1	1	1	0					1011001110
14741	0	0	0	0	1	1	1	1	1	1					1111001100
14740	0	0	1	0	1	0	1	1	1	0					0011001101
14739	0	1	0	0	1	0	1	1	1	0					0011001110
14734	0	0	1	0	1	1	1	1	1	1					1111001101
14733	0	1	0	0	1	1	1	1	1	1					1111001110
14732	1	0	0	0	1	1	1	1	1	1					1111101100
14731	0	0	0	0	1	0	1	1	1	1					0111001100
14730	0	0	1	0	1	0	1	1	1	1					0111001101
14729	0	1	0	0	1	0	1	1	1	1					0111001110
14728	1	0	0	0	1	0	1	1	1	1					0111101100
14718	1	0	0	0	1	1	1	0	1	0					1010101100
14713	1	0	0	0	1	0	1	0	1	0					0010101100
14712	0	1	1	1	0	0	0	1	1	0					0011010011
14711	0	1	1	1	0	1	0	1	1	0					1011010011
14707	1	0	1	1	1	0	0	1	1	0					0011110101
14706	1	0	1	1	1	1	0	1	1	0					1011110101
14705	0	1	1	1	0	0	0	1	1	1					0111010011
14704	0	1	1	1	0	1	0	1	1	1					1111010011
14703	1	0	1	1	1	1	0	1	1	1					1111110101
14702	0	1	1	0	0	0	1	0	1	0					0010001011
14701	0	1	1	0	0	1	1	0	1	0					1010001011
14700	1	0	1	1	1	0	0	1	1	1					0111110101
14697	0	1	1	0	0	0	1	0	1	1					0110001011
14696	0	1	1	0	0	1	1	0	1	1					1110001011
14695	1	0	1	0	1	0	1	0	1	0					0010101101
14694	1	0	1	0	1	1	1	0	1	0					1010101101
14693	1	0	0	0	1	1	1	0	1	1					1110101100
14692	1	0	1	0	1	1	1	0	1	1					1110101101
14691	1	0	0	0	1	0	1	0	1	1					0110101100
14690	1	0	1	0	1	0	1	0	1	1					0110101101
14687	1	1	1	1	0	0	0	0	1	0					0010110011
14686	1	1	1	1	0	1	0	0	1	0					1010110011
14682	1	0	0	0	1	0	1	1	1	0					0011101100
14672	1	0	0	0	1	1	1	1	1	0					1011101100
14671	1	1	1	1	0	1	0	0	1	1					1110110011
14670	1	1	1	1	0	0	0	0	1	1					0110110011
14659	0	1	1	0	0	0	1	1	1	0					0011001011
14658	0	1	1	0	0	1	1	1	1	0					1011001011
14657	0	1	1	0	0	1	1	1	1	1					1111001011
14656	1	1	0	0	0	1	1	1	1	1					1111101010
14655	0	0	1	1	1	0	1	0	1	0					0010011101
14654	0	1	0	1	1	0	1	0	1	0					0010011110
14653	0	1	1	0	0	0	1	1	1	1					0111001011
14652	1	1	0	0	0	0	1	1	1	1					0111101010
14651	0	0	1	1	1	1	1	0	1	0					1010011101
14650	0	1	0	1	1	1	1	0	1	0					1010011110
14643	1	0	1	0	1	1	1	1	1	0					1011101101
14642	1	0	1	0	1	0	1	1	1	0					0011101101
14640	0	0	1	1	1	1	1	0	1	1					1110011101
14639	0	1	0	1	1	1	1	0	1	1					1110011110
14637	0	0	1	1	1	0	1	0	1	1					0110011101
14636	0	1	0	1	1	0	1	0	1	1					0110011110
14635	1	0	1	0	1	1	1	1	1	1					1111101101
14634	1	0	1	0	1	0	1	1	1	1					0111101101
14629	1	1	0	0	0	0	1	0	1	0					0010101010
14624	1	1	0	0	0	1	1	0	1	0					1010101010
14622	0	1	1	0	1	0	0	0	1	0					0010000111
14621	1	1	0	0	1	0	0	0	1	0					0010100110
14620	0	1	1	0	1	1	0	0	1	0					1010000111
14619	1	1	0	0	1	1	0	0	1	0					1010100110
14613	1	1	1	1	0	1	0	1	1	0					1011110011
14612	0	1	1	0	1	1	0	0	1	1					1110000111
14611	1	1	0	0	1	1	0	0	1	1					1110100110
14610	1	1	1	1	0	0	0	1	1	0					0011110011
14609	0	1	1	0	1	0	0	0	1	1					0110000111
14608	1	1	0	0	1	0	0	0	1	1					0110100110
14603	1	1	1	1	0	1	0	1	1	1					1111110011
14602	1	1	1	1	0	0	0	1	1	1					0111110011
14601	1	1	1	0	0	1	1	0	1	0					1010101011
14600	1	1	0	1	0	1	1	0	1	0					1010111010
14599	1	1	0	0	0	1	1	0	1	1					1110101010
14598	1	1	1	0	0	0	1	0	1	0					0010101011
14597	1	1	0	1	0	0	1	0	1	0					0010111010
14592	1	1	1	0	0	1	1	0	1	1					1110101011
14591	1	1	0	1	0	1	1	0	1	1					1110111010
14590	1	1	0	0	0	0	1	0	1	1					0110101010
14589	1	1	1	0	0	0	1	0	1	1					0110101011
14588	1	1	0	1	0	0	1	0	1	1					0110111010
14583	0	0	1	1	1	0	1	1	1	0					0011011101
14582	0	1	0	1	1	0	1	1	1	0					0011011110
14579	0	0	1	1	1	1	1	1	1	0					1011011101
14578	0	1	0	1	1	1	1	1	1	0					1011011110
14575	0	0	1	1	1	0	1	1	1	1					0111011101
14574	0	1	0	1	1	0	1	1	1	1					0111011110
14573	0	0	1	1	1	1	1	1	1	1					1111011101
14572	0	1	0	1	1	1	1	1	1	1					1111011110
14567	1	1	0	0	0	0	1	1	1	0					0011101010
14564	1	1	0	0	0	1	1	1	1	0					1011101010
14563	0	1	1	0	1	1	0	1	1	0					1011000111
14562	1	1	0	0	1	1	0	1	1	0					1011100110
14559	0	1	1	0	1	0	0	1	1	0					0011000111
14558	1	1	0	0	1	0	0	1	1	0					0011100110
14549	0	1	1	0	1	1	0	1	1	1					1111000111
14548	1	1	0	0	1	1	0	1	1	1					1111100110
14547	0	1	1	0	1	0	0	1	1	1					0111000111
14546	1	1	0	0	1	0	0	1	1	1					0111100110
14541	0	1	1	1	0	0	1	0	1	0					0010011011
14540	0	1	1	1	0	1	1	0	1	0					1010011011
14539	1	1	1	0	0	0	1	1	1	0					0011101011
14538	1	1	0	1	0	0	1	1	1	0					0011111010
14537	1	1	1	0	0	1	1	1	1	0					1011101011
14536	1	1	0	1	0	1	1	1	1	0					1011111010
14535	1	0	1	1	1	0	1	0	1	0					0010111101
14534	1	0	1	1	1	1	1	0	1	0					1010111101
14531	0	1	1	1	0	1	1	0	1	1					1110011011
14528	0	1	1	1	0	0	1	0	1	1					0110011011
14527	1	1	1	0	0	1	1	1	1	1					1111101011
14526	1	1	0	1	0	1	1	1	1	1					1111111010
14525	1	1	1	0	0	0	1	1	1	1					0111101011
14524	1	1	0	1	0	0	1	1	1	1					0111111010
14523	1	0	1	1	1	1	1	0	1	1					1110111101
14522	1	0	1	1	1	0	1	0	1	1					0110111101
14521	1	1	1	0	1	0	0	0	1	0					0010100111
14520	1	1	0	1	1	0	0	0	1	0					0010110110
14519	1	1	1	0	1	1	0	0	1	0					1010100111
14518	1	1	0	1	1	1	0	0	1	0					1010110110
14517	1	1	1	0	1	0	0	0	1	1					0110100111
14516	1	1	0	1	1	0	0	0	1	1					0110110110
14513	1	1	1	0	1	1	0	0	1	1					1110100111
14512	1	1	0	1	1	1	0	0	1	1					1110110110
14499	0	1	1	1	0	0	1	1	1	0					0011011011
14498	0	1	1	1	0	1	1	1	1	0					1011011011
14497	1	0	1	1	1	0	1	1	1	0					0011111101
14494	1	0	1	1	1	1	1	1	1	0					1011111101
14489	0	1	1	1	0	0	1	1	1	1					0111011011
14488	0	1	1	1	0	1	1	1	1	1					1111011011
14487	1	0	1	1	1	1	1	1	1	1					1111111101
14486	1	0	1	1	1	0	1	1	1	1					0111111101
14481	1	1	1	0	1	0	0	1	1	0					0011100111
14480	1	1	0	1	1	0	0	1	1	0					0011110110
14479	0	1	1	1	1	0	0	0	1	0					0010010111
14478	0	1	1	1	1	1	0	0	1	0					1010010111
14473	1	1	1	0	1	1	0	1	1	0					1011100111
14472	1	1	0	1	1	1	0	1	1	0					1011110110
14471	0	1	1	1	1	1	0	0	1	1					1110010111
14470	1	1	1	0	1	1	0	1	1	1					1111100111
14469	1	1	0	1	1	1	0	1	1	1					1111110110
14468	0	1	1	1	1	0	0	0	1	1					0110010111
14467	1	1	1	0	1	0	0	1	1	1					0111100111
14466	1	1	0	1	1	0	0	1	1	1					0111110110
14465	1	1	1	1	0	1	1	0	1	0					1010111011
14464	1	1	0	1	1	1	1	0	1	0					1010111110
14463	1	1	1	1	0	0	1	0	1	0					0010111011
14462	1	1	0	1	1	0	1	0	1	0					0010111110
14461	1	1	1	1	0	1	1	0	1	1					1110111011
14460	1	1	0	1	1	1	1	0	1	1					1110111110
14459	1	1	1	1	0	0	1	0	1	1					0110111011
14458	1	1	0	1	1	0	1	0	1	1					0110111110
14445	0	1	1	1	1	0	0	1	1	0					0011010111
14444	0	1	1	1	1	1	0	1	1	0					1011010111
