# Supplementary material
Source: publisher figshare collection journal article supplement (https://springernature.figshare.com/ndownloader/files/17562821)
Supplement: Supplementary file 1 [file 17562821 › CytoscapeSession-2018_09_25-21_15/tables/14328-STG%2C+Model+1%2C+Fluctuating+Inputs/LOCAL_ATTRS-org.cytoscape.model.CyEdge-STG%2C+Model+1%2C+Fluctuating+Inputs+default++edge.cytable]

CyCSV-Version	1
SUID	EdgeBetweenness	interaction	name	selected
java.lang.Long	java.lang.Double	java.lang.String	java.lang.String	java.lang.Boolean
	mutable
STG, Model 1, Fluctuating Inputs default edge
15362	177.9115726	1	0111111111 (1) 1111111111	false
15363	527.92538255	1	0111111111 (1) 0011111111	false
15364	191.66912454	1	0111111111 (1) 0101111111	false
15365	1569.35079296	1	0111111111 (1) 0110111111	false
15366	322.41675718	1	0111111111 (1) 0111110111	false
15367	277.0160968	1	0111111111 (1) 0111111101	false
15368	405.99833309	1	0111111111 (1) 0111111110	false
15369	899.64760049	1	1111111111 (1) 0111111111	false
15370	1013.77091546	1	1111111111 (1) 1011111111	false
15371	268.59804905	1	1111111111 (1) 1101111111	false
15372	2981.0317069	1	1111111111 (1) 1110111111	false
15373	373.85379711	1	1111111111 (1) 1111110111	false
15374	397.70169646	1	1111111111 (1) 1111111101	false
15375	585.81307525	1	1111111111 (1) 1111111110	false
15376	241.33765044	1	1011111111 (1) 0011111111	false
15377	858.45036934	1	1011111111 (1) 1010111111	false
15378	1688.32630658	1	1011111111 (1) 1011011111	false
15379	215.12958978	1	1011111111 (1) 1011110111	false
15380	503.48919374	1	1011111111 (1) 1011111101	false
15381	521.51395355	1	1011111111 (1) 1011111110	false
15382	428.26621889	1	0011111111 (1) 1011111111	false
15383	776.09512696	1	0011111111 (1) 0010111111	false
15384	947.55320803	1	0011111111 (1) 0011011111	false
15385	221.24339423	1	0011111111 (1) 0011110111	false
15386	359.42942371	1	0011111111 (1) 0011111101	false
15387	432.44281123	1	0011111111 (1) 0011111110	false
15388	488.61652905	1	1101111111 (1) 0101111111	false
15389	3807.04782601	1	1101111111 (1) 1001111111	false
15390	372.57285044	1	1101111111 (1) 1101110111	false
15391	474.21100534	1	1101111111 (1) 1101111101	false
15392	560.71640126	1	1101111111 (1) 1101111110	false
15393	318.04088404	1	0101111111 (1) 1101111111	false
15394	2570.34765802	1	0101111111 (1) 0001111111	false
15395	326.86143681	1	0101111111 (1) 0101110111	false
15396	327.93037334	1	0101111111 (1) 0101111101	false
15397	430.58781965	1	0101111111 (1) 0101111110	false
15398	319.88207533	1	1001111111 (1) 0001111111	false
15399	1964.95543488	1	1001111111 (1) 1011111111	false
15400	1764.47333296	1	1001111111 (1) 1001011111	false
15401	254.63406104	1	1001111111 (1) 1001110111	false
15402	659.65625753	1	1001111111 (1) 1001111101	false
15403	613.15162926	1	1001111111 (1) 1001111110	false
15404	484.38953463	1	0001111111 (1) 1001111111	false
15405	1559.73001457	1	0001111111 (1) 0011111111	false
15406	1138.86582004	1	0001111111 (1) 0001011111	false
15407	247.66036528	1	0001111111 (1) 0001110111	false
15408	468.61229315	1	0001111111 (1) 0001111101	false
15409	502.41880104	1	0001111111 (1) 0001111110	false
15410	166.380599	1	0110111111 (1) 1110111111	false
15411	222.31379627	1	0110111111 (1) 0010111111	false
15412	1642.03339395	1	0110111111 (1) 0100111111	false
15413	1097.478911	1	0110111111 (1) 0110011111	false
15414	251.91665786	1	0110111111 (1) 0110110111	false
15415	352.01780025	1	0110111111 (1) 0110111101	false
15416	444.9165211	1	0110111111 (1) 0110111110	false
15417	870.73949356	1	1110111111 (1) 0110111111	false
15418	403.8451575	1	1110111111 (1) 1010111111	false
15419	2680.93965298	1	1110111111 (1) 1100111111	false
15420	1645.63499949	1	1110111111 (1) 1110011111	false
15421	284.45096762	1	1110111111 (1) 1110110111	false
15422	443.41191197	1	1110111111 (1) 1110111101	false
15423	597.88631767	1	1110111111 (1) 1110111110	false
15424	148.90323201	1	1010111111 (1) 0010111111	false
15425	1014.37679243	1	1010111111 (1) 1010011111	false
15426	178.77458928	1	1010111111 (1) 1010110111	false
15427	322.91202197	1	1010111111 (1) 1010111101	false
15428	352.36403978	1	1010111111 (1) 1010111110	false
15429	277.49604291	1	0010111111 (1) 1010111111	false
15430	655.24256061	1	0010111111 (1) 0010011111	false
15431	197.69258065	1	0010111111 (1) 0010110111	false
15432	245.53192618	1	0010111111 (1) 0010111101	false
15433	339.20531963	1	0010111111 (1) 0010111110	false
15434	563.47693649	1	1100111111 (1) 0100111111	false
15435	1722.88948548	1	1100111111 (1) 1000111111	false
15436	244.87021607	1	1100111111 (1) 1101111111	false
15437	1150.36942517	1	1100111111 (1) 1100011111	false
15438	264.02936495	1	1100111111 (1) 1100110111	false
15439	388.80970637	1	1100111111 (1) 1100111101	false
15440	482.67384511	1	1100111111 (1) 1100111110	false
15441	187.13388724	1	0100111111 (1) 1100111111	false
15442	1110.27686667	1	0100111111 (1) 0000111111	false
15443	181.52032305	1	0100111111 (1) 0101111111	false
15444	922.15577941	1	0100111111 (1) 0100011111	false
15445	235.9107875	1	0100111111 (1) 0100110111	false
15446	323.02548367	1	0100111111 (1) 0100111101	false
15447	392.2215508	1	0100111111 (1) 0100111110	false
15448	243.24332616	1	0000111111 (1) 1000111111	false
15449	106.13167454	1	0000111111 (1) 0010111111	false
15450	322.75380058	1	0000111111 (1) 0001111111	false
15451	572.8430275	1	0000111111 (1) 0000011111	false
15452	167.94148252	1	0000111111 (1) 0000110111	false
15453	262.32281612	1	0000111111 (1) 0000111101	false
15454	292.34652026	1	0000111111 (1) 0000111110	false
15455	231.48050594	1	1000111111 (1) 0000111111	false
15456	125.15818748	1	1000111111 (1) 1010111111	false
15457	424.5636527	1	1000111111 (1) 1001111111	false
15458	807.27607394	1	1000111111 (1) 1000011111	false
15459	173.12457071	1	1000111111 (1) 1000110111	false
15460	325.73822466	1	1000111111 (1) 1000111101	false
15461	339.99732842	1	1000111111 (1) 1000111110	false
15462	159.15599827	1	1111011111 (1) 0111011111	false
15463	86.34156769	1	1111011111 (1) 1011011111	false
15464	123.72524621	1	1111011111 (1) 1101011111	false
15465	147.79914076	1	1111011111 (1) 1110011111	false
15466	370.03964147	1	1111011111 (1) 1111111111	false
15467	344.16794958	1	1111011111 (1) 1111001111	false
15468	249.46870569	1	1111011111 (1) 1111010111	false
15469	287.62494204	1	1111011111 (1) 1111011110	false
15470	124.89258259	1	0111011111 (1) 1111011111	false
15471	66.80919963	1	0111011111 (1) 0011011111	false
15472	124.00995956	1	0111011111 (1) 0101011111	false
15473	145.42042997	1	0111011111 (1) 0110011111	false
15474	346.69026052	1	0111011111 (1) 0111111111	false
15475	471.11407059	1	0111011111 (1) 0111001111	false
15476	247.15780652	1	0111011111 (1) 0111010111	false
15477	299.70671271	1	0111011111 (1) 0111011110	false
15478	251.69195012	1	1011011111 (1) 0011011111	false
15479	649.64502906	1	1011011111 (1) 1010011111	false
15480	8539.53455117	1	1011011111 (1) 1011001111	false
15481	1558.17879921	1	1011011111 (1) 1011010111	false
15482	1457.12580679	1	1011011111 (1) 1011011110	false
15483	1304.45065321	1	0011011111 (1) 1011011111	false
15484	508.08183111	1	0011011111 (1) 0010011111	false
15485	1654.19442031	1	0011011111 (1) 0011001111	false
15486	1329.90603955	1	0011011111 (1) 0011010111	false
15487	805.5067862	1	0011011111 (1) 0011011110	false
15488	313.34671886	1	0101011111 (1) 1101011111	false
15489	653.75959856	1	0101011111 (1) 0001011111	false
15490	1562.54473259	1	0101011111 (1) 0101111111	false
15491	1404.57310217	1	0101011111 (1) 0101001111	false
15492	587.34735578	1	0101011111 (1) 0101010111	false
15493	575.42508019	1	0101011111 (1) 0101011110	false
15494	449.07677448	1	1101011111 (1) 0101011111	false
15495	1370.34532325	1	1101011111 (1) 1001011111	false
15496	1796.58190775	1	1101011111 (1) 1101111111	false
15497	512.43877881	1	1101011111 (1) 1101001111	false
15498	658.5273519	1	1101011111 (1) 1101010111	false
15499	581.69168614	1	1101011111 (1) 1101011110	false
15500	322.07643026	1	1001011111 (1) 0001011111	false
15501	3942.30377537	1	1001011111 (1) 1011011111	false
15502	4858.42108981	1	1001011111 (1) 1001001111	false
15503	1816.65626841	1	1001011111 (1) 1001010111	false
15504	1357.79961478	1	1001011111 (1) 1001011110	false
15505	1166.57925365	1	0001011111 (1) 1001011111	false
15506	1722.63159517	1	0001011111 (1) 0011011111	false
15507	1557.34631259	1	0001011111 (1) 0001001111	false
15508	1574.38555367	1	0001011111 (1) 0001010111	false
15509	847.11888475	1	0001011111 (1) 0001011110	false
15510	135.61662665	1	0111101111 (1) 1111101111	false
15511	1930.32973844	1	0111101111 (1) 0011101111	false
15512	408.8991487	1	0111101111 (1) 0101101111	false
15513	4553.32634187	1	0111101111 (1) 0110101111	false
15514	1809.64916361	1	0111101111 (1) 0111111111	false
15515	366.43846931	1	0111101111 (1) 0111100111	false
15516	773.1718044	1	0111101111 (1) 0111101101	false
15517	1400.51576467	1	0111101111 (1) 0111101110	false
15518	4594.74556836	1	1111101111 (1) 0111101111	false
15519	443.0453332	1	1111101111 (1) 1101101111	false
15520	9380.42456547	1	1111101111 (1) 1110101111	false
15521	5349.91348621	1	1111101111 (1) 1111111111	false
15522	582.30462771	1	1111101111 (1) 1111100111	false
15523	1366.53808912	1	1111101111 (1) 1111101101	false
15524	2565.04128622	1	1111101111 (1) 1111101110	false
15525	235.24484096	1	0110011111 (1) 1110011111	false
15526	170.19457298	1	0110011111 (1) 0010011111	false
15527	1461.13560696	1	0110011111 (1) 0100011111	false
15528	559.41704043	1	0110011111 (1) 0110001111	false
15529	1436.34280967	1	0110011111 (1) 0110010111	false
15530	585.08793412	1	0110011111 (1) 0110011110	false
15531	559.82539169	1	1110011111 (1) 0110011111	false
15532	207.49495797	1	1110011111 (1) 1010011111	false
15533	1738.37494371	1	1110011111 (1) 1100011111	false
15534	382.93490184	1	1110011111 (1) 1110001111	false
15535	1647.3763866	1	1110011111 (1) 1110010111	false
15536	627.48002659	1	1110011111 (1) 1110011110	false
15537	63.1006049	1	1011101111 (1) 0011101111	false
15538	1696.29175807	1	1011101111 (1) 1111101111	false
15539	1243.9552859	1	1011101111 (1) 1010101111	false
15540	199.19447339	1	1011101111 (1) 1011001111	false
15541	96.89014329	1	1011101111 (1) 1011111111	false
15542	264.48089571	1	1011101111 (1) 1011100111	false
15543	541.36594192	1	1011101111 (1) 1011101101	false
15544	896.56034454	1	1011101111 (1) 1011101110	false
15545	2385.95250843	1	0011101111 (1) 1011101111	false
15546	1561.21332246	1	0011101111 (1) 0010101111	false
15547	162.49538887	1	0011101111 (1) 0011001111	false
15548	405.72784394	1	0011101111 (1) 0011111111	false
15549	218.76216266	1	0011101111 (1) 0011100111	false
15550	613.06729635	1	0011101111 (1) 0011101101	false
15551	990.71454473	1	0011101111 (1) 0011101110	false
15552	213.14027543	1	1010011111 (1) 0010011111	false
15553	2740.73120415	1	1010011111 (1) 1010001111	false
15554	1558.24182429	1	1010011111 (1) 1010010111	false
15555	836.38613038	1	1010011111 (1) 1010011110	false
15556	709.01066205	1	0010011111 (1) 1010011111	false
15557	1060.23012437	1	0010011111 (1) 0010001111	false
15558	1277.49613555	1	0010011111 (1) 0010010111	false
15559	694.13322787	1	0010011111 (1) 0010011110	false
15560	116.6190981	1	0101101111 (1) 1101101111	false
15561	8189.41843674	1	0101101111 (1) 0001101111	false
15562	984.84819749	1	0101101111 (1) 0101111111	false
15563	432.01911439	1	0101101111 (1) 0101100111	false
15564	1062.85405973	1	0101101111 (1) 0101101101	false
15565	1674.46224095	1	0101101111 (1) 0101101110	false
15566	2857.41191827	1	1101101111 (1) 0101101111	false
15567	2303.85101881	1	1101101111 (1) 1101111111	false
15568	389.97563628	1	1101101111 (1) 1101100111	false
15569	616.92439026	1	1101101111 (1) 1101101101	false
15570	1074.609218	1	1101101111 (1) 1101101110	false
15571	660.90013519	1	1100011111 (1) 0100011111	false
15572	1455.14930517	1	1100011111 (1) 1000011111	false
15573	2524.83019799	1	1100011111 (1) 1101011111	false
15574	566.67976485	1	1100011111 (1) 1100001111	false
15575	1698.01132983	1	1100011111 (1) 1100010111	false
15576	837.79472022	1	1100011111 (1) 1100011110	false
15577	377.75885791	1	0100011111 (1) 1100011111	false
15578	883.07996446	1	0100011111 (1) 0000011111	false
15579	2295.4773576	1	0100011111 (1) 0101011111	false
15580	1098.84777258	1	0100011111 (1) 0100001111	false
15581	1505.77093613	1	0100011111 (1) 0100010111	false
15582	790.71546097	1	0100011111 (1) 0100011110	false
15583	2593.29559288	1	0011101110 (1) 1011101110	false
15584	1685.53830725	1	0011101110 (1) 0010101110	false
15585	183.21907996	1	0011101110 (1) 0011001110	false
15586	328.21734629	1	0011101110 (1) 0011111110	false
15587	276.7388404	1	0011101110 (1) 0011100110	false
15588	1273.22506798	1	0011101110 (1) 0011101010	false
15589	688.99504109	1	0011101110 (1) 0011101100	false
15590	217.0417931	1	0011101110 (1) 0011101111	false
15591	2838.623892	1	0001101111 (1) 1001101111	false
15592	3572.41297897	1	0001101111 (1) 0011101111	false
15593	200.03473426	1	0001101111 (1) 0001001111	false
15594	575.81238373	1	0001101111 (1) 0001111111	false
15595	297.69942867	1	0001101111 (1) 0001100111	false
15596	983.97387812	1	0001101111 (1) 0001101101	false
15597	1376.93296413	1	0001101111 (1) 0001101110	false
15598	74.63901794	1	1011101110 (1) 0011101110	false
15599	1739.8727634	1	1011101110 (1) 1111101110	false
15600	1318.90111413	1	1011101110 (1) 1010101110	false
15601	212.30769814	1	1011101110 (1) 1011001110	false
15602	81.47847952	1	1011101110 (1) 1011111110	false
15603	322.04034587	1	1011101110 (1) 1011100110	false
15604	1016.76918187	1	1011101110 (1) 1011101010	false
15605	593.92286069	1	1011101110 (1) 1011101100	false
15606	181.17633567	1	1011101110 (1) 1011101111	false
15607	68.48152842	1	1001101111 (1) 0001101111	false
15608	99.78646392	1	1001101111 (1) 1101101111	false
15609	1921.81743338	1	1001101111 (1) 1011101111	false
15610	146.86252192	1	1001101111 (1) 1001001111	false
15611	105.71359294	1	1001101111 (1) 1001111111	false
15612	195.21417164	1	1001101111 (1) 1001100111	false
15613	451.00524357	1	1001101111 (1) 1001101101	false
15614	705.88136424	1	1001101111 (1) 1001101110	false
15615	684.92616049	1	0000011111 (1) 1000011111	false
15616	309.48256517	1	0000011111 (1) 0010011111	false
15617	937.15530854	1	0000011111 (1) 0001011111	false
15618	1007.16059983	1	0000011111 (1) 0000001111	false
15619	1444.57995027	1	0000011111 (1) 0000010111	false
15620	656.2176944	1	0000011111 (1) 0000011110	false
15621	289.71980928	1	1000011111 (1) 0000011111	false
15622	440.28277296	1	1000011111 (1) 1010011111	false
15623	1745.03119843	1	1000011111 (1) 1001011111	false
15624	2066.02127225	1	1000011111 (1) 1000001111	false
15625	1708.64638469	1	1000011111 (1) 1000010111	false
15626	879.35318481	1	1000011111 (1) 1000011110	false
15627	110.24407661	1	0110101111 (1) 1110101111	false
15628	682.81391485	1	0110101111 (1) 0010101111	false
15629	3791.25739509	1	0110101111 (1) 0100101111	false
15630	129.8083197	1	0110101111 (1) 0110001111	false
15631	1267.95588916	1	0110101111 (1) 0110111111	false
15632	218.92667306	1	0110101111 (1) 0110100111	false
15633	597.94377974	1	0110101111 (1) 0110101101	false
15634	994.27725891	1	0110101111 (1) 0110101110	false
15635	124.32120465	1	0110101110 (1) 1110101110	false
15636	766.85213387	1	0110101110 (1) 0010101110	false
15637	4252.82111448	1	0110101110 (1) 0100101110	false
15638	128.56340933	1	0110101110 (1) 0110001110	false
15639	1113.55057386	1	0110101110 (1) 0110111110	false
15640	277.26686708	1	0110101110 (1) 0110100110	false
15641	1515.18391044	1	0110101110 (1) 0110101010	false
15642	660.84532961	1	0110101110 (1) 0110101100	false
15643	260.4478517	1	0110101110 (1) 0110101111	false
15644	2523.33849997	1	1110101111 (1) 0110101111	false
15645	3970.21116271	1	1110101111 (1) 1100101111	false
15646	153.49065498	1	1110101111 (1) 1110001111	false
15647	3121.99201393	1	1110101111 (1) 1110111111	false
15648	317.95813236	1	1110101111 (1) 1110100111	false
15649	901.94484612	1	1110101111 (1) 1110101101	false
15650	1458.17336854	1	1110101111 (1) 1110101110	false
15651	2850.22946145	1	1110101110 (1) 0110101110	false
15652	4393.38824374	1	1110101110 (1) 1100101110	false
15653	148.43818063	1	1110101110 (1) 1110001110	false
15654	2709.08130821	1	1110101110 (1) 1110111110	false
15655	418.01516369	1	1110101110 (1) 1110100110	false
15656	2519.18207976	1	1110101110 (1) 1110101010	false
15657	989.06951965	1	1110101110 (1) 1110101100	false
15658	395.97586842	1	1110101110 (1) 1110101111	false
15659	46.92420604	1	1010101111 (1) 0010101111	false
15660	1915.82671617	1	1010101111 (1) 1110101111	false
15661	120.48193699	1	1010101111 (1) 1010001111	false
15662	70.91693476	1	1010101111 (1) 1010111111	false
15663	210.89971696	1	1010101111 (1) 1010100111	false
15664	382.49877855	1	1010101111 (1) 1010101101	false
15665	719.25351406	1	1010101111 (1) 1010101110	false
15666	1504.90544952	1	0010101111 (1) 1010101111	false
15667	96.72814228	1	0010101111 (1) 0010001111	false
15668	213.37437481	1	0010101111 (1) 0010111111	false
15669	149.07222764	1	0010101111 (1) 0010100111	false
15670	310.35768985	1	0010101111 (1) 0010101101	false
15671	608.04666379	1	0010101111 (1) 0010101110	false
15672	209.62862838	1	0111110111 (1) 1111110111	false
15673	277.18317491	1	0111110111 (1) 0011110111	false
15674	196.509567	1	0111110111 (1) 0101110111	false
15675	605.98437527	1	0111110111 (1) 0110110111	false
15676	996.64270281	1	0111110111 (1) 0111110101	false
15677	790.80107486	1	0111110111 (1) 0111110110	false
15678	680.15094797	1	1111110111 (1) 0111110111	false
15679	398.14583731	1	1111110111 (1) 1011110111	false
15680	260.96058049	1	1111110111 (1) 1101110111	false
15681	793.97638885	1	1111110111 (1) 1110110111	false
15682	1395.65715839	1	1111110111 (1) 1111110101	false
15683	1015.55387208	1	1111110111 (1) 1111110110	false
15684	257.22586778	1	1011110111 (1) 0011110111	false
15685	494.73174751	1	1011110111 (1) 1010110111	false
15686	3771.74590616	1	1011110111 (1) 1011110101	false
15687	1837.05623861	1	1011110111 (1) 1011110110	false
15688	613.43713714	1	0011110111 (1) 1011110111	false
15689	488.08249826	1	0011110111 (1) 0010110111	false
15690	2490.53063783	1	0011110111 (1) 0011110101	false
15691	1651.33773087	1	0011110111 (1) 0011110110	false
15692	79.99024732	1	0100101111 (1) 1100101111	false
15693	3192.61368375	1	0100101111 (1) 0000101111	false
15694	339.75776003	1	0100101111 (1) 0101101111	false
15695	147.9306831	1	0100101111 (1) 0100001111	false
15696	725.750962	1	0100101111 (1) 0100111111	false
15697	224.07781799	1	0100101111 (1) 0100100111	false
15698	494.90879236	1	0100101111 (1) 0100101101	false
15699	866.65064043	1	0100101111 (1) 0100101110	false
15700	88.60666231	1	0100101110 (1) 1100101110	false
15701	3498.03022843	1	0100101110 (1) 0000101110	false
15702	383.88051754	1	0100101110 (1) 0101101110	false
15703	143.93149729	1	0100101110 (1) 0100001110	false
15704	628.37720333	1	0100101110 (1) 0100111110	false
15705	275.46698631	1	0100101110 (1) 0100100110	false
15706	1146.21607395	1	0100101110 (1) 0100101010	false
15707	536.83529536	1	0100101110 (1) 0100101100	false
15708	209.93727314	1	0100101110 (1) 0100101111	false
15709	1642.03189628	1	1100101111 (1) 0100101111	false
15710	233.58112097	1	1100101111 (1) 1101101111	false
15711	118.7269116	1	1100101111 (1) 1100001111	false
15712	1411.12098461	1	1100101111 (1) 1100111111	false
15713	209.74556096	1	1100101111 (1) 1100100111	false
15714	435.38102575	1	1100101111 (1) 1100101101	false
15715	760.56796822	1	1100101111 (1) 1100101110	false
15716	1823.80998275	1	1100101110 (1) 0100101110	false
15717	260.18865821	1	1100101110 (1) 1101101110	false
15718	116.23469761	1	1100101110 (1) 1100001110	false
15719	1215.87561491	1	1100101110 (1) 1100111110	false
15720	262.05311522	1	1100101110 (1) 1100100110	false
15721	1124.09251212	1	1100101110 (1) 1100101010	false
15722	472.09459033	1	1100101110 (1) 1100101100	false
15723	183.05792005	1	1100101110 (1) 1100101111	false
15724	56.15645154	1	1010101110 (1) 0010101110	false
15725	1973.71028724	1	1010101110 (1) 1110101110	false
15726	136.60231989	1	1010101110 (1) 1010001110	false
15727	59.72846999	1	1010101110 (1) 1010111110	false
15728	265.47346027	1	1010101110 (1) 1010100110	false
15729	802.95328297	1	1010101110 (1) 1010101010	false
15730	430.46780487	1	1010101110 (1) 1010101100	false
15731	135.8241581	1	1010101110 (1) 1010101111	false
15732	76.68858065	1	1001101110 (1) 0001101110	false
15733	103.84967857	1	1001101110 (1) 1101101110	false
15734	2083.25185981	1	1001101110 (1) 1011101110	false
15735	142.42489295	1	1001101110 (1) 1001001110	false
15736	88.16119989	1	1001101110 (1) 1001111110	false
15737	234.3516445	1	1001101110 (1) 1001100110	false
15738	735.28118445	1	1001101110 (1) 1001101010	false
15739	476.87123744	1	1001101110 (1) 1001101100	false
15740	147.37703086	1	1001101110 (1) 1001101111	false
15741	68.03223997	1	1000101111 (1) 0000101111	false
15742	224.34764975	1	1000101111 (1) 1100101111	false
15743	232.31010769	1	1000101111 (1) 1010101111	false
15744	288.70998935	1	1000101111 (1) 1001101111	false
15745	88.07464889	1	1000101111 (1) 1000001111	false
15746	84.20089589	1	1000101111 (1) 1000111111	false
15747	146.12966931	1	1000101111 (1) 1000100111	false
15748	266.75567218	1	1000101111 (1) 1000101101	false
15749	497.28641019	1	1000101111 (1) 1000101110	false
15750	75.05643874	1	1000101110 (1) 0000101110	false
15751	246.84421693	1	1000101110 (1) 1100101110	false
15752	256.65236393	1	1000101110 (1) 1010101110	false
15753	316.77904554	1	1000101110 (1) 1001101110	false
15754	84.84887164	1	1000101110 (1) 1000001110	false
15755	72.91526116	1	1000101110 (1) 1000111110	false
15756	178.36861603	1	1000101110 (1) 1000100110	false
15757	504.38653821	1	1000101110 (1) 1000101010	false
15758	287.87177961	1	1000101110 (1) 1000101100	false
15759	101.79224575	1	1000101110 (1) 1000101111	false
15760	1598.10924275	1	0010101110 (1) 1010101110	false
15761	122.70972237	1	0010101110 (1) 0010001110	false
15762	175.47400117	1	0010101110 (1) 0010111110	false
15763	187.89259111	1	0010101110 (1) 0010100110	false
15764	754.88764031	1	0010101110 (1) 0010101010	false
15765	362.44616177	1	0010101110 (1) 0010101100	false
15766	115.8388935	1	0010101110 (1) 0010101111	false
15767	3097.59689934	1	0001101110 (1) 1001101110	false
15768	3970.93485619	1	0001101110 (1) 0011101110	false
15769	195.32394201	1	0001101110 (1) 0001001110	false
15770	450.11010389	1	0001101110 (1) 0001111110	false
15771	375.95377402	1	0001101110 (1) 0001100110	false
15772	1691.06076654	1	0001101110 (1) 0001101010	false
15773	1049.96590441	1	0001101110 (1) 0001101100	false
15774	312.69198136	1	0001101110 (1) 0001101111	false
15775	1548.66169049	1	0000101111 (1) 1000101111	false
15776	206.12119882	1	0000101111 (1) 0010101111	false
15777	382.05301071	1	0000101111 (1) 0001101111	false
15778	109.79380105	1	0000101111 (1) 0000001111	false
15779	304.3164419	1	0000101111 (1) 0000111111	false
15780	178.28525195	1	0000101111 (1) 0000100111	false
15781	358.19675244	1	0000101111 (1) 0000101101	false
15782	650.33481595	1	0000101111 (1) 0000101110	false
15783	1660.22896734	1	0000101110 (1) 1000101110	false
15784	232.76469652	1	0000101110 (1) 0010101110	false
15785	428.16180917	1	0000101110 (1) 0001101110	false
15786	106.05782591	1	0000101110 (1) 0000001110	false
15787	262.67407826	1	0000101110 (1) 0000111110	false
15788	217.61773183	1	0000101110 (1) 0000100110	false
15789	750.51498684	1	0000101110 (1) 0000101010	false
15790	385.8987427	1	0000101110 (1) 0000101100	false
15791	147.50264456	1	0000101110 (1) 0000101111	false
15792	318.84169563	1	0101110111 (1) 1101110111	false
15793	1122.51031944	1	0101110111 (1) 0001110111	false
15794	1117.29633729	1	0101110111 (1) 0101110101	false
15795	811.93172248	1	0101110111 (1) 0101110110	false
15796	383.20952007	1	1101110111 (1) 0101110111	false
15797	1665.60893343	1	1101110111 (1) 1001110111	false
15798	1629.59756402	1	1101110111 (1) 1101110101	false
15799	1027.72251661	1	1101110111 (1) 1101110110	false
15800	158.31891434	1	0111101110 (1) 1111101110	false
15801	2241.98265009	1	0111101110 (1) 0011101110	false
15802	456.52593546	1	0111101110 (1) 0101101110	false
15803	5287.34567465	1	0111101110 (1) 0110101110	false
15804	1598.95817118	1	0111101110 (1) 0111111110	false
15805	462.50446991	1	0111101110 (1) 0111100110	false
15806	2286.12970066	1	0111101110 (1) 0111101010	false
15807	893.02781328	1	0111101110 (1) 0111101100	false
15808	377.23294864	1	0111101110 (1) 0111101111	false
15809	115.59740986	1	0111001111 (1) 1111001111	false
15810	94.13073818	1	0111001111 (1) 0011001111	false
15811	327.11986042	1	0111001111 (1) 0101001111	false
15812	283.35200788	1	0111001111 (1) 0110001111	false
15813	5785.58499019	1	0111001111 (1) 0111101111	false
15814	420.25545697	1	0111001111 (1) 0111000111	false
15815	1143.61963712	1	0111001111 (1) 0111001110	false
15816	5404.12366613	1	1111101110 (1) 0111101110	false
15817	491.61174263	1	1111101110 (1) 1101101110	false
15818	10899.17496512	1	1111101110 (1) 1110101110	false
15819	4685.04328892	1	1111101110 (1) 1111111110	false
15820	775.71053606	1	1111101110 (1) 1111100110	false
15821	5012.11783108	1	1111101110 (1) 1111101010	false
15822	1578.87553863	1	1111101110 (1) 1111101100	false
15823	732.46003486	1	1111101110 (1) 1111101111	false
15824	5631.41755038	1	1111001111 (1) 0111001111	false
15825	608.31748235	1	1111001111 (1) 1101001111	false
15826	603.03780149	1	1111001111 (1) 1110001111	false
15827	20766.74489828	1	1111001111 (1) 1111101111	false
15828	929.37044303	1	1111001111 (1) 1111000111	false
15829	3580.04281598	1	1111001111 (1) 1111001110	false
15830	328.9770005	1	1001110111 (1) 0001110111	false
15831	1704.60709711	1	1001110111 (1) 1011110111	false
15832	4445.17478867	1	1001110111 (1) 1001110101	false
15833	1895.35044017	1	1001110111 (1) 1001110110	false
15834	714.2200666	1	0001110111 (1) 1001110111	false
15835	1403.42017623	1	0001110111 (1) 0011110111	false
15836	3100.03018964	1	0001110111 (1) 0001110101	false
15837	1755.62490669	1	0001110111 (1) 0001110110	false
15838	153.95406692	1	1011001111 (1) 0011001111	false
15839	24600.01160397	1	1011001111 (1) 1111001111	false
15840	918.19349327	1	1011001111 (1) 1010001111	false
15841	1929.25617948	1	1011001111 (1) 1011000111	false
15842	4030.0495163	1	1011001111 (1) 1011001110	false
15843	4043.13666578	1	0011001111 (1) 1011001111	false
15844	491.58806264	1	0011001111 (1) 0010001111	false
15845	1142.14465405	1	0011001111 (1) 0011000111	false
15846	1279.32349518	1	0011001111 (1) 0011001110	false
15847	788.70510311	1	1110110111 (1) 0110110111	false
15848	239.93863245	1	1110110111 (1) 1010110111	false
15849	1775.17529121	1	1110110111 (1) 1100110111	false
15850	2739.9333023	1	1110110111 (1) 1110110101	false
15851	1748.51016802	1	1110110111 (1) 1110110110	false
15852	285.19690573	1	0110110111 (1) 1110110111	false
15853	193.11778024	1	0110110111 (1) 0010110111	false
15854	1226.9094956	1	0110110111 (1) 0100110111	false
15855	2089.29560646	1	0110110111 (1) 0110110101	false
15856	1372.14649743	1	0110110111 (1) 0110110110	false
15857	3164.99375603	1	1101101110 (1) 0101101110	false
15858	1844.4588926	1	1101101110 (1) 1101111110	false
15859	455.2622867	1	1101101110 (1) 1101100110	false
15860	1636.74707803	1	1101101110 (1) 1101101010	false
15861	661.73340019	1	1101101110 (1) 1101101100	false
15862	269.1988508	1	1101101110 (1) 1101101111	false
15863	2933.05113353	1	1101001111 (1) 0101001111	false
15864	5370.57527511	1	1101001111 (1) 1101101111	false
15865	530.5327372	1	1101001111 (1) 1101000111	false
15866	1425.56877204	1	1101001111 (1) 1101001110	false
15867	130.30882881	1	0101101110 (1) 1101101110	false
15868	9293.85487382	1	0101101110 (1) 0001101110	false
15869	782.96885496	1	0101101110 (1) 0101111110	false
15870	526.47065592	1	0101101110 (1) 0101100110	false
15871	2191.89438581	1	0101101110 (1) 0101101010	false
15872	1167.72826914	1	0101101110 (1) 0101101100	false
15873	396.71873317	1	0101101110 (1) 0101101111	false
15874	141.34641133	1	0101001111 (1) 1101001111	false
15875	1487.82545849	1	0101001111 (1) 0001001111	false
15876	7365.50222897	1	0101001111 (1) 0101101111	false
15877	573.81985377	1	0101001111 (1) 0101000111	false
15878	1526.23581858	1	0101001111 (1) 0101001110	false
15879	181.32873899	1	1001001111 (1) 0001001111	false
15880	3164.44969077	1	1001001111 (1) 1101001111	false
15881	11363.81302017	1	1001001111 (1) 1011001111	false
15882	1759.37246923	1	1001001111 (1) 1001000111	false
15883	2494.83258006	1	1001001111 (1) 1001001110	false
15884	2868.00903615	1	0001001111 (1) 1001001111	false
15885	3049.04361905	1	0001001111 (1) 0011001111	false
15886	1517.43030315	1	0001001111 (1) 0001000111	false
15887	1346.74268384	1	0001001111 (1) 0001001110	false
15888	228.70295196	1	1010110111 (1) 0010110111	false
15889	1975.0487211	1	1010110111 (1) 1010110101	false
15890	1609.07002125	1	1010110111 (1) 1010110110	false
15891	392.95786972	1	0010110111 (1) 1010110111	false
15892	1657.17581031	1	0010110111 (1) 0010110101	false
15893	1578.10795079	1	0010110111 (1) 0010110110	false
15894	666.9492153	1	1100110111 (1) 0100110111	false
15895	1398.70580356	1	1100110111 (1) 1000110111	false
15896	680.60130955	1	1100110111 (1) 1101110111	false
15897	3319.67082811	1	1100110111 (1) 1100110101	false
15898	1863.03681623	1	1100110111 (1) 1100110110	false
15899	891.73740971	1	1111111110 (1) 0111111110	false
15900	1065.4144548	1	1111111110 (1) 1011111110	false
15901	287.86256587	1	1111111110 (1) 1101111110	false
15902	2917.14267942	1	1111111110 (1) 1110111110	false
15903	760.65336758	1	1111111110 (1) 1111110110	false
15904	398.5704567	1	1111111110 (1) 1111111100	false
15905	290.42676212	1	1111111110 (1) 1111111111	false
15906	775.31268243	1	1111111011 (1) 0111111011	false
15907	990.29102505	1	1111111011 (1) 1011111011	false
15908	225.07976975	1	1111111011 (1) 1101111011	false
15909	2322.22314104	1	1111111011 (1) 1110111011	false
15910	465.73204348	1	1111111011 (1) 1111110011	false
15911	364.12537832	1	1111111011 (1) 1111111111	false
15912	370.63604329	1	1111111011 (1) 1111111001	false
15913	264.2386179	1	1111111011 (1) 1111111010	false
15914	368.31985996	1	0100110111 (1) 1100110111	false
15915	912.65864541	1	0100110111 (1) 0000110111	false
15916	486.08244675	1	0100110111 (1) 0101110111	false
15917	2704.66417254	1	0100110111 (1) 0100110101	false
15918	1520.27070603	1	0100110111 (1) 0100110110	false
15919	205.19108266	1	0111111110 (1) 1111111110	false
15920	579.26055752	1	0111111110 (1) 0011111110	false
15921	211.59318409	1	0111111110 (1) 0101111110	false
15922	1614.44486667	1	0111111110 (1) 0110111110	false
15923	634.99457287	1	0111111110 (1) 0111110110	false
15924	283.31880386	1	0111111110 (1) 0111111100	false
15925	187.58119667	1	0111111110 (1) 0111111111	false
15926	191.23996951	1	0111111011 (1) 1111111011	false
15927	530.75758319	1	0111111011 (1) 0011111011	false
15928	166.08885339	1	0111111011 (1) 0101111011	false
15929	1369.30162524	1	0111111011 (1) 0110111011	false
15930	359.65397893	1	0111111011 (1) 0111110011	false
15931	260.71983844	1	0111111011 (1) 0111111111	false
15932	270.42575281	1	0111111011 (1) 0111111001	false
15933	190.87243314	1	0111111011 (1) 0111111010	false
15934	266.24233351	1	1011111110 (1) 0011111110	false
15935	901.11116142	1	1011111110 (1) 1010111110	false
15936	2313.21703234	1	1011111110 (1) 1011011110	false
15937	516.95476588	1	1011111110 (1) 1011110110	false
15938	621.70013656	1	1011111110 (1) 1011111100	false
15939	214.06561239	1	1011111110 (1) 1011111111	false
15940	288.97226483	1	1011111011 (1) 0011111011	false
15941	1115.07088321	1	1011111011 (1) 1010111011	false
15942	2465.89953822	1	1011111011 (1) 1011011011	false
15943	502.64424101	1	1011111011 (1) 1011110011	false
15944	342.29873851	1	1011111011 (1) 1011111111	false
15945	637.66274356	1	1011111011 (1) 1011111001	false
15946	282.20847736	1	1011111011 (1) 1011111010	false
15947	126.07431078	1	0110001111 (1) 1110001111	false
15948	183.48194192	1	0110001111 (1) 0010001111	false
15949	1984.04379575	1	0110001111 (1) 0100001111	false
15950	1234.63162869	1	0110001111 (1) 0110000111	false
15951	756.33944168	1	0110001111 (1) 0110001110	false
15952	1731.44868551	1	1110001111 (1) 0110001111	false
15953	2925.79972755	1	1110001111 (1) 1100001111	false
15954	1974.96229198	1	1110001111 (1) 1110000111	false
15955	1165.43987277	1	1110001111 (1) 1110001110	false
15956	515.9345485	1	0011111110 (1) 1011111110	false
15957	810.27522411	1	0011111110 (1) 0010111110	false
15958	1225.99679145	1	0011111110 (1) 0011011110	false
15959	529.59344061	1	0011111110 (1) 0011110110	false
15960	417.59909052	1	0011111110 (1) 0011111100	false
15961	177.54987942	1	0011111110 (1) 0011111111	false
15962	538.52984181	1	0011111011 (1) 1011111011	false
15963	1001.8365909	1	0011111011 (1) 0010111011	false
15964	1343.26098864	1	0011111011 (1) 0011011011	false
15965	428.08490219	1	0011111011 (1) 0011110011	false
15966	284.75941214	1	0011111011 (1) 0011111111	false
15967	456.54241928	1	0011111011 (1) 0011111001	false
15968	229.21395305	1	0011111011 (1) 0011111010	false
15969	545.19993406	1	0000110111 (1) 1000110111	false
15970	290.51084508	1	0000110111 (1) 0010110111	false
15971	865.64027141	1	0000110111 (1) 0001110111	false
15972	2708.42934391	1	0000110111 (1) 0000110101	false
15973	1682.88996488	1	0000110111 (1) 0000110110	false
15974	323.52215249	1	1000110111 (1) 0000110111	false
15975	315.58769304	1	1000110111 (1) 1010110111	false
15976	1055.56872775	1	1000110111 (1) 1001110111	false
15977	3290.56036628	1	1000110111 (1) 1000110101	false
15978	1624.39500047	1	1000110111 (1) 1000110110	false
15979	137.79635271	1	1010001111 (1) 0010001111	false
15980	4303.31057805	1	1010001111 (1) 1110001111	false
15981	2161.51243007	1	1010001111 (1) 1010000111	false
15982	1412.35711203	1	1010001111 (1) 1010001110	false
15983	1463.5533031	1	0010001111 (1) 1010001111	false
15984	1213.41160691	1	0010001111 (1) 0010000111	false
15985	929.76339166	1	0010001111 (1) 0010001110	false
15986	131.62243106	1	0111010111 (1) 1111010111	false
15987	137.89355752	1	0111010111 (1) 0011010111	false
15988	113.46264802	1	0111010111 (1) 0101010111	false
15989	270.54988141	1	0111010111 (1) 0110010111	false
15990	507.04707979	1	0111010111 (1) 0111110111	false
15991	191.91130135	1	0111010111 (1) 0111000111	false
15992	367.97333673	1	0111010111 (1) 0111010110	false
15993	125.26858576	1	1111010111 (1) 0111010111	false
15994	176.57085038	1	1111010111 (1) 1011010111	false
15995	119.36255557	1	1111010111 (1) 1101010111	false
15996	264.50526404	1	1111010111 (1) 1110010111	false
15997	536.76777869	1	1111010111 (1) 1111110111	false
15998	135.64627296	1	1111010111 (1) 1111000111	false
15999	368.39136851	1	1111010111 (1) 1111010110	false
16000	498.64565132	1	1101111110 (1) 0101111110	false
16001	3933.462767	1	1101111110 (1) 1001111110	false
16002	738.67084672	1	1101111110 (1) 1101110110	false
16003	511.15698812	1	1101111110 (1) 1101111100	false
16004	292.24710123	1	1101111110 (1) 1101111111	false
16005	547.25350655	1	1101111011 (1) 0101111011	false
16006	4557.55646958	1	1101111011 (1) 1001111011	false
16007	566.65756103	1	1101111011 (1) 1101110011	false
16008	510.97543515	1	1101111011 (1) 1101111111	false
16009	491.85465485	1	1101111011 (1) 1101111001	false
16010	332.496882	1	1101111011 (1) 1101111010	false
16011	353.03433418	1	0101111110 (1) 1101111110	false
16012	2692.859513	1	0101111110 (1) 0001111110	false
16013	644.37480168	1	0101111110 (1) 0101110110	false
16014	342.30298799	1	0101111110 (1) 0101111100	false
16015	224.07262645	1	0101111110 (1) 0101111111	false
16016	341.21963562	1	0101111011 (1) 1101111011	false
16017	2854.38303283	1	0101111011 (1) 0001111011	false
16018	427.79063894	1	0101111011 (1) 0101110011	false
16019	372.49663869	1	0101111011 (1) 0101111111	false
16020	321.88579747	1	0101111011 (1) 0101111001	false
16021	240.76883561	1	0101111011 (1) 0101111010	false
16022	288.56056761	1	1011010111 (1) 0011010111	false
16023	778.81624301	1	1011010111 (1) 1010010111	false
16024	2143.24435942	1	1011010111 (1) 1011110111	false
16025	2702.33934435	1	1011010111 (1) 1011000111	false
16026	1561.76836745	1	1011010111 (1) 1011010110	false
16027	743.84737311	1	0011010111 (1) 1011010111	false
16028	605.75620676	1	0011010111 (1) 0010010111	false
16029	1798.87115661	1	0011010111 (1) 0011110111	false
16030	1008.46139028	1	0011010111 (1) 0011000111	false
16031	1372.78375941	1	0011010111 (1) 0011010110	false
16032	346.51873139	1	1001111110 (1) 0001111110	false
16033	2175.20518919	1	1001111110 (1) 1011111110	false
16034	2268.45729406	1	1001111110 (1) 1001011110	false
16035	560.2369106	1	1001111110 (1) 1001110110	false
16036	797.29050944	1	1001111110 (1) 1001111100	false
16037	283.33339565	1	1001111110 (1) 1001111111	false
16038	354.48059892	1	1001111011 (1) 0001111011	false
16039	3392.66791898	1	1001111011 (1) 1011111011	false
16040	653.67108739	1	1001111011 (1) 1001011011	false
16041	538.44406993	1	1001111011 (1) 1001110011	false
16042	503.70478907	1	1001111011 (1) 1001111111	false
16043	596.19834161	1	1001111011 (1) 1001111001	false
16044	312.97405125	1	1001111011 (1) 1001111010	false
16045	570.25030183	1	0001111110 (1) 1001111110	false
16046	1678.0871174	1	0001111110 (1) 0011111110	false
16047	1391.46271978	1	0001111110 (1) 0001011110	false
16048	543.735357	1	0001111110 (1) 0001110110	false
16049	529.50195182	1	0001111110 (1) 0001111100	false
16050	235.01644141	1	0001111110 (1) 0001111111	false
16051	498.23556322	1	0001111011 (1) 1001111011	false
16052	2384.27537853	1	0001111011 (1) 0011111011	false
16053	460.64252806	1	0001111011 (1) 0001011011	false
16054	454.14487841	1	0001111011 (1) 0001110011	false
16055	409.86446962	1	0001111011 (1) 0001111111	false
16056	426.28566174	1	0001111011 (1) 0001111001	false
16057	256.19342041	1	0001111011 (1) 0001111010	false
16058	151.30083183	1	0100001111 (1) 1100001111	false
16059	1463.89724846	1	0100001111 (1) 0000001111	false
16060	3328.26838288	1	0100001111 (1) 0101001111	false
16061	1361.73511405	1	0100001111 (1) 0100000111	false
16062	1138.77532397	1	0100001111 (1) 0100001110	false
16063	1736.8909285	1	1100001111 (1) 0100001111	false
16064	2703.89068795	1	1100001111 (1) 1101001111	false
16065	1433.02212278	1	1100001111 (1) 1100000111	false
16066	1095.76263495	1	1100001111 (1) 1100001110	false
16067	164.74352962	1	1000001111 (1) 0000001111	false
16068	932.65456726	1	1000001111 (1) 1100001111	false
16069	614.00664215	1	1000001111 (1) 1010001111	false
16070	3034.08512757	1	1000001111 (1) 1001001111	false
16071	1878.6293055	1	1000001111 (1) 1000000111	false
16072	1296.75706676	1	1000001111 (1) 1000001110	false
16073	1359.70014975	1	0000001111 (1) 1000001111	false
16074	410.55463432	1	0000001111 (1) 0010001111	false
16075	1504.05127225	1	0000001111 (1) 0001001111	false
16076	1661.7244894	1	0000001111 (1) 0000000111	false
16077	1016.88440222	1	0000001111 (1) 0000001110	false
16078	243.1661653	1	0101010111 (1) 1101010111	false
16079	818.98689417	1	0101010111 (1) 0001010111	false
16080	604.62601681	1	0101010111 (1) 0101110111	false
16081	390.30899928	1	0101010111 (1) 0101000111	false
16082	608.58661531	1	0101010111 (1) 0101010110	false
16083	254.14014941	1	1101010111 (1) 0101010111	false
16084	1291.8483228	1	1101010111 (1) 1001010111	false
16085	672.3503606	1	1101010111 (1) 1101110111	false
16086	160.5030751	1	1101010111 (1) 1101000111	false
16087	662.22327203	1	1101010111 (1) 1101010110	false
16088	419.8855707	1	1001010111 (1) 0001010111	false
16089	2832.18308051	1	1001010111 (1) 1011010111	false
16090	3163.61919929	1	1001010111 (1) 1001110111	false
16091	2679.02804538	1	1001010111 (1) 1001000111	false
16092	2004.27352188	1	1001010111 (1) 1001010110	false
16093	933.66952493	1	0001010111 (1) 1001010111	false
16094	1944.12863332	1	0001010111 (1) 0011010111	false
16095	2736.1213552	1	0001010111 (1) 0001110111	false
16096	1293.08998538	1	0001010111 (1) 0001000111	false
16097	1778.75883683	1	0001010111 (1) 0001010110	false
16098	190.94290886	1	0110111110 (1) 1110111110	false
16099	232.68686955	1	0110111110 (1) 0010111110	false
16100	1694.71802967	1	0110111110 (1) 0100111110	false
16101	1251.04848603	1	0110111110 (1) 0110011110	false
16102	531.95820134	1	0110111110 (1) 0110110110	false
16103	377.55058778	1	0110111110 (1) 0110111100	false
16104	208.58695988	1	0110111110 (1) 0110111111	false
16105	171.63264864	1	0110111011 (1) 1110111011	false
16106	236.17490534	1	0110111011 (1) 0010111011	false
16107	1484.28320364	1	0110111011 (1) 0100111011	false
16108	738.51230902	1	0110111011 (1) 0110011011	false
16109	372.66755012	1	0110111011 (1) 0110110011	false
16110	292.42454387	1	0110111011 (1) 0110111111	false
16111	328.36912967	1	0110111011 (1) 0110111001	false
16112	198.57189281	1	0110111011 (1) 0110111010	false
16113	872.45503729	1	1110111110 (1) 0110111110	false
16114	400.50143328	1	1110111110 (1) 1010111110	false
16115	2665.25899372	1	1110111110 (1) 1100111110	false
16116	1774.45642477	1	1110111110 (1) 1110011110	false
16117	613.88221564	1	1110111110 (1) 1110110110	false
16118	454.47720262	1	1110111110 (1) 1110111100	false
16119	301.52077887	1	1110111110 (1) 1110111111	false
16120	758.15251847	1	1110111011 (1) 0110111011	false
16121	416.91890886	1	1110111011 (1) 1010111011	false
16122	2310.52018305	1	1110111011 (1) 1100111011	false
16123	993.67532819	1	1110111011 (1) 1110011011	false
16124	475.7777262	1	1110111011 (1) 1110110011	false
16125	387.98340209	1	1110111011 (1) 1110111111	false
16126	410.3075316	1	1110111011 (1) 1110111001	false
16127	262.38610242	1	1110111011 (1) 1110111010	false
16128	316.15290077	1	0010111110 (1) 1010111110	false
16129	885.1835789	1	0010111110 (1) 0010011110	false
16130	505.33404521	1	0010111110 (1) 0010110110	false
16131	282.86770742	1	0010111110 (1) 0010111100	false
16132	106.14197942	1	0010111110 (1) 0010111111	false
16133	259.72148136	1	0010111011 (1) 1010111011	false
16134	952.70156387	1	0010111011 (1) 0010011011	false
16135	312.08711043	1	0010111011 (1) 0010110011	false
16136	174.20824596	1	0010111011 (1) 0010111111	false
16137	330.89959391	1	0010111011 (1) 0010111001	false
16138	146.19484154	1	0010111011 (1) 0010111010	false
16139	167.49564334	1	1010111110 (1) 0010111110	false
16140	1344.39009021	1	1010111110 (1) 1010011110	false
16141	461.80353291	1	1010111110 (1) 1010110110	false
16142	378.19566091	1	1010111110 (1) 1010111100	false
16143	118.4991456	1	1010111110 (1) 1010111111	false
16144	177.92655051	1	1010111011 (1) 0010111011	false
16145	1142.10150383	1	1010111011 (1) 1010011011	false
16146	328.77431174	1	1010111011 (1) 1010110011	false
16147	194.96483789	1	1010111011 (1) 1010111111	false
16148	384.20787385	1	1010111011 (1) 1010111001	false
16149	157.31353202	1	1010111011 (1) 1010111010	false
16150	271.72477937	1	0111110110 (1) 1111110110	false
16151	397.32140897	1	0111110110 (1) 0011110110	false
16152	237.15138674	1	0111110110 (1) 0101110110	false
16153	843.09215469	1	0111110110 (1) 0110110110	false
16154	1081.18853925	1	0111110110 (1) 0111110010	false
16155	1180.0423267	1	0111110110 (1) 0111110100	false
16156	111.88456905	1	0111110110 (1) 0111110111	false
16157	141.66727751	1	0111100111 (1) 1111100111	false
16158	291.26125902	1	0111100111 (1) 0011100111	false
16159	272.5024321	1	0111100111 (1) 0101100111	false
16160	735.91441179	1	0111100111 (1) 0110100111	false
16161	1211.02307824	1	0111100111 (1) 0111110111	false
16162	757.72805542	1	0111100111 (1) 0111100101	false
16163	957.16283388	1	0111100111 (1) 0111100110	false
16164	268.0829113	1	0110010111 (1) 1110010111	false
16165	197.9791541	1	0110010111 (1) 0010010111	false
16166	1075.24990622	1	0110010111 (1) 0100010111	false
16167	1483.29109288	1	0110010111 (1) 0110110111	false
16168	457.46887889	1	0110010111 (1) 0110000111	false
16169	1049.4638902	1	0110010111 (1) 0110010110	false
16170	764.75621007	1	1111110110 (1) 0111110110	false
16171	562.29067618	1	1111110110 (1) 1011110110	false
16172	315.98128961	1	1111110110 (1) 1101110110	false
16173	1123.78133046	1	1111110110 (1) 1110110110	false
16174	1484.20366453	1	1111110110 (1) 1111110010	false
16175	1617.18755811	1	1111110110 (1) 1111110100	false
16176	146.62906675	1	1111110110 (1) 1111110111	false
16177	1937.1830463	1	1111100111 (1) 0111100111	false
16178	377.25064997	1	1111100111 (1) 1101100111	false
16179	1578.10310569	1	1111100111 (1) 1110100111	false
16180	2968.65440712	1	1111100111 (1) 1111110111	false
16181	1532.85879142	1	1111100111 (1) 1111100101	false
16182	1785.62068154	1	1111100111 (1) 1111100110	false
16183	477.1157214	1	1110010111 (1) 0110010111	false
16184	235.96564588	1	1110010111 (1) 1010010111	false
16185	1216.88107556	1	1110010111 (1) 1100010111	false
16186	1451.16055839	1	1110010111 (1) 1110110111	false
16187	321.53874075	1	1110010111 (1) 1110000111	false
16188	1119.77346439	1	1110010111 (1) 1110010110	false
16189	410.10306156	1	1011110110 (1) 0011110110	false
16190	816.09105222	1	1011110110 (1) 1010110110	false
16191	4233.92740149	1	1011110110 (1) 1011110010	false
16192	4212.98145748	1	1011110110 (1) 1011110100	false
16193	161.91881034	1	1011110110 (1) 1011110111	false
16194	187.60358742	1	1011100111 (1) 0011100111	false
16195	5076.53293744	1	1011100111 (1) 1111100111	false
16196	1397.94032082	1	1011100111 (1) 1010100111	false
16197	953.11296787	1	1011100111 (1) 1011110111	false
16198	2005.01190914	1	1011100111 (1) 1011100101	false
16199	2454.88873396	1	1011100111 (1) 1011100110	false
16200	215.63821806	1	0100111110 (1) 1100111110	false
16201	1154.2518627	1	0100111110 (1) 0000111110	false
16202	209.66789168	1	0100111110 (1) 0101111110	false
16203	1084.16140458	1	0100111110 (1) 0100011110	false
16204	484.28152938	1	0100111110 (1) 0100110110	false
16205	349.83311034	1	0100111110 (1) 0100111100	false
16206	179.27463866	1	0100111110 (1) 0100111111	false
16207	183.58645291	1	0100111011 (1) 1100111011	false
16208	1047.81517433	1	0100111011 (1) 0000111011	false
16209	217.60835557	1	0100111011 (1) 0101111011	false
16210	657.65049661	1	0100111011 (1) 0100011011	false
16211	318.81471069	1	0100111011 (1) 0100110011	false
16212	273.70874723	1	0100111011 (1) 0100111111	false
16213	289.13556147	1	0100111011 (1) 0100111001	false
16214	178.17639303	1	0100111011 (1) 0100111010	false
16215	575.40453887	1	1100111110 (1) 0100111110	false
16216	1762.92463725	1	1100111110 (1) 1000111110	false
16217	283.64615263	1	1100111110 (1) 1101111110	false
16218	1286.2225879	1	1100111110 (1) 1100011110	false
16219	544.81647458	1	1100111110 (1) 1100110110	false
16220	410.69177477	1	1100111110 (1) 1100111100	false
16221	231.24453523	1	1100111110 (1) 1100111111	false
16222	524.10924749	1	1100111011 (1) 0100111011	false
16223	1616.76000961	1	1100111011 (1) 1000111011	false
16224	312.55366819	1	1100111011 (1) 1101111011	false
16225	726.43511617	1	1100111011 (1) 1100011011	false
16226	382.14852478	1	1100111011 (1) 1100110011	false
16227	338.67991958	1	1100111011 (1) 1100111111	false
16228	344.28652392	1	1100111011 (1) 1100111001	false
16229	219.03342983	1	1100111011 (1) 1100111010	false
16230	248.79050072	1	1010010111 (1) 0010010111	false
16231	1461.31275769	1	1010010111 (1) 1010110111	false
16232	2754.47321714	1	1010010111 (1) 1010000111	false
16233	1427.22174296	1	1010010111 (1) 1010010110	false
16234	669.86117333	1	0010010111 (1) 1010010111	false
16235	1335.21049621	1	0010010111 (1) 0010110111	false
16236	1005.82014849	1	0010010111 (1) 0010000111	false
16237	1295.55637037	1	0010010111 (1) 0010010110	false
16238	854.64305497	1	0011110110 (1) 1011110110	false
16239	826.87192061	1	0011110110 (1) 0010110110	false
16240	3692.06898816	1	0011110110 (1) 0011110010	false
16241	3175.4581519	1	0011110110 (1) 0011110100	false
16242	145.42573408	1	0011110110 (1) 0011110111	false
16243	2003.3529357	1	0011100111 (1) 1011100111	false
16244	746.87825748	1	0011100111 (1) 0010100111	false
16245	982.9536015	1	0011100111 (1) 0011110111	false
16246	1265.14344168	1	0011100111 (1) 0011100101	false
16247	1657.88922489	1	0011100111 (1) 0011100110	false
16248	289.95605961	1	0000111110 (1) 1000111110	false
16249	128.23913694	1	0000111110 (1) 0010111110	false
16250	379.27028911	1	0000111110 (1) 0001111110	false
16251	710.95740001	1	0000111110 (1) 0000011110	false
16252	341.02740433	1	0000111110 (1) 0000110110	false
16253	292.98724801	1	0000111110 (1) 0000111100	false
16254	125.59328004	1	0000111110 (1) 0000111111	false
16255	228.46549504	1	0000111011 (1) 1000111011	false
16256	137.68079346	1	0000111011 (1) 0010111011	false
16257	398.22793318	1	0000111011 (1) 0001111011	false
16258	272.89136661	1	0000111011 (1) 0000011011	false
16259	233.10656915	1	0000111011 (1) 0000110011	false
16260	227.91555315	1	0000111011 (1) 0000111111	false
16261	220.57766003	1	0000111011 (1) 0000111001	false
16262	134.31908722	1	0000111011 (1) 0000111010	false
16263	245.72081002	1	1000111110 (1) 0000111110	false
16264	156.11247138	1	1000111110 (1) 1010111110	false
16265	514.249923	1	1000111110 (1) 1001111110	false
16266	1052.03359425	1	1000111110 (1) 1000011110	false
16267	353.73616782	1	1000111110 (1) 1000110110	false
16268	374.40195175	1	1000111110 (1) 1000111100	false
16269	144.27834897	1	1000111110 (1) 1000111111	false
16270	219.85109276	1	1000111011 (1) 0000111011	false
16271	162.3323885	1	1000111011 (1) 1010111011	false
16272	546.31390892	1	1000111011 (1) 1001111011	false
16273	363.06973674	1	1000111011 (1) 1000011011	false
16274	257.1390207	1	1000111011 (1) 1000110011	false
16275	264.72648734	1	1000111011 (1) 1000111111	false
16276	263.30123712	1	1000111011 (1) 1000111001	false
16277	150.35670564	1	1000111011 (1) 1000111010	false
16278	240.98501097	1	0111111101 (1) 1111111101	false
16279	754.89096663	1	0111111101 (1) 0011111101	false
16280	243.54629624	1	0111111101 (1) 0101111101	false
16281	1559.21284364	1	0111111101 (1) 0110111101	false
16282	352.63419322	1	0111111101 (1) 0111111100	false
16283	601.83855785	1	1111111101 (1) 0111111101	false
16284	1421.68078203	1	1111111101 (1) 1011111101	false
16285	320.69590193	1	1111111101 (1) 1101111101	false
16286	2160.56684152	1	1111111101 (1) 1110111101	false
16287	483.07246989	1	1111111101 (1) 1111111100	false
16288	163.04902714	1	1111011011 (1) 0111011011	false
16289	86.81712635	1	1111011011 (1) 1011011011	false
16290	105.18672332	1	1111011011 (1) 1101011011	false
16291	105.19936916	1	1111011011 (1) 1110011011	false
16292	476.38986439	1	1111011011 (1) 1111111011	false
16293	267.85752445	1	1111011011 (1) 1111001011	false
16294	198.36879967	1	1111011011 (1) 1111010011	false
16295	175.74086468	1	1111011011 (1) 1111011111	false
16296	121.04083541	1	1111011011 (1) 1111011010	false
16297	128.73267824	1	0111011011 (1) 1111011011	false
16298	71.76073215	1	0111011011 (1) 0011011011	false
16299	109.61763669	1	0111011011 (1) 0101011011	false
16300	104.86678707	1	0111011011 (1) 0110011011	false
16301	456.13745372	1	0111011011 (1) 0111111011	false
16302	376.93616503	1	0111011011 (1) 0111001011	false
16303	199.4089812	1	0111011011 (1) 0111010011	false
16304	182.46265677	1	0111011011 (1) 0111011111	false
16305	123.80081436	1	0111011011 (1) 0111011010	false
16306	395.87225791	1	0101110110 (1) 1101110110	false
16307	1570.78886261	1	0101110110 (1) 0001110110	false
16308	1045.72895729	1	0101110110 (1) 0101110010	false
16309	1263.8643735	1	0101110110 (1) 0101110100	false
16310	126.69310725	1	0101110110 (1) 0101110111	false
16311	156.77728959	1	0101100111 (1) 1101100111	false
16312	2175.42694457	1	0101100111 (1) 0001100111	false
16313	920.49491443	1	0101100111 (1) 0101110111	false
16314	837.64987157	1	0101100111 (1) 0101100101	false
16315	1086.61186086	1	0101100111 (1) 0101100110	false
16316	499.58480831	1	1100010111 (1) 0100010111	false
16317	1289.28142461	1	1100010111 (1) 1000010111	false
16318	1002.86316361	1	1100010111 (1) 1101010111	false
16319	1736.57351916	1	1100010111 (1) 1100110111	false
16320	325.12726453	1	1100010111 (1) 1100000111	false
16321	1249.21551725	1	1100010111 (1) 1100010110	false
16322	356.96008118	1	0100010111 (1) 1100010111	false
16323	877.17725947	1	0100010111 (1) 0000010111	false
16324	853.96885862	1	0100010111 (1) 0101010111	false
16325	1765.67700283	1	0100010111 (1) 0100110111	false
16326	610.22858369	1	0100010111 (1) 0100000111	false
16327	1169.71502247	1	0100010111 (1) 0100010110	false
16328	321.16132932	1	1011111101 (1) 0011111101	false
16329	792.9721233	1	1011111101 (1) 1010111101	false
16330	14513.20507072	1	1011111101 (1) 1011011101	false
16331	1589.07863299	1	1011111101 (1) 1011111100	false
16332	438.92660129	1	1101110110 (1) 0101110110	false
16333	2330.53099784	1	1101110110 (1) 1001110110	false
16334	1363.06738844	1	1101110110 (1) 1101110010	false
16335	1814.29145887	1	1101110110 (1) 1101110100	false
16336	159.35362586	1	1101110110 (1) 1101110111	false
16337	1214.09984207	1	1101100111 (1) 0101100111	false
16338	1828.88209793	1	1101100111 (1) 1101110111	false
16339	951.29265552	1	1101100111 (1) 1101100101	false
16340	990.51508695	1	1101100111 (1) 1101100110	false
16341	1546.48287631	1	0011111101 (1) 1011111101	false
16342	649.35732258	1	0011111101 (1) 0010111101	false
16343	5674.67750415	1	0011111101 (1) 0011011101	false
16344	891.69786309	1	0011111101 (1) 0011111100	false
16345	198.10197881	1	1011011011 (1) 0011011011	false
16346	337.58547081	1	1011011011 (1) 1001011011	false
16347	631.98964089	1	1011011011 (1) 1010011011	false
16348	5541.1233076	1	1011011011 (1) 1011001011	false
16349	541.74841264	1	1011011011 (1) 1011010011	false
16350	513.45166376	1	1011011011 (1) 1011011111	false
16351	344.88423852	1	1011011011 (1) 1011011010	false
16352	925.10635263	1	0011011011 (1) 1011011011	false
16353	292.69807186	1	0011011011 (1) 0001011011	false
16354	571.84036874	1	0011011011 (1) 0010011011	false
16355	1134.56196096	1	0011011011 (1) 0011001011	false
16356	419.75674576	1	0011011011 (1) 0011010011	false
16357	335.29163495	1	0011011011 (1) 0011011111	false
16358	216.22069886	1	0011011011 (1) 0011011010	false
16359	453.45014668	1	1001110110 (1) 0001110110	false
16360	2482.76321498	1	1001110110 (1) 1011110110	false
16361	3358.76611153	1	1001110110 (1) 1001110010	false
16362	4198.44088522	1	1001110110 (1) 1001110100	false
16363	190.92086	1	1001110110 (1) 1001110111	false
16364	211.27791543	1	1001100111 (1) 0001100111	false
16365	533.33621718	1	1001100111 (1) 1101100111	false
16366	3589.42746728	1	1001100111 (1) 1011100111	false
16367	1083.64598483	1	1001100111 (1) 1001110111	false
16368	1718.28044037	1	1001100111 (1) 1001100101	false
16369	1987.78491301	1	1001100111 (1) 1001100110	false
16370	870.17546733	1	0000010111 (1) 1000010111	false
16371	424.01067915	1	0000010111 (1) 0010010111	false
16372	1192.41655341	1	0000010111 (1) 0001010111	false
16373	3208.64249342	1	0000010111 (1) 0000110111	false
16374	1251.89091466	1	0000010111 (1) 0000000111	false
16375	1998.6965234	1	0000010111 (1) 0000010110	false
16376	436.94789509	1	1000010111 (1) 0000010111	false
16377	648.80473887	1	1000010111 (1) 1010010111	false
16378	1505.89362808	1	1000010111 (1) 1001010111	false
16379	3321.52895577	1	1000010111 (1) 1000110111	false
16380	2521.03592963	1	1000010111 (1) 1000000111	false
16381	2126.67342276	1	1000010111 (1) 1000010110	false
16382	863.44329105	1	0001110110 (1) 1001110110	false
16383	2069.16611066	1	0001110110 (1) 0011110110	false
16384	3133.82730736	1	0001110110 (1) 0001110010	false
16385	3214.80454144	1	0001110110 (1) 0001110100	false
16386	170.23720271	1	0001110110 (1) 0001110111	false
16387	1742.91795752	1	0001100111 (1) 1001100111	false
16388	2345.32172603	1	0001100111 (1) 0011100111	false
16389	1283.93598765	1	0001100111 (1) 0001110111	false
16390	1594.03247363	1	0001100111 (1) 0001100101	false
16391	1979.59955253	1	0001100111 (1) 0001100110	false
16392	413.62568106	1	0101111101 (1) 1101111101	false
16393	2670.31553234	1	0101111101 (1) 0001111101	false
16394	376.77024617	1	0101111101 (1) 0101111100	false
16395	338.74608588	1	1101111101 (1) 0101111101	false
16396	4785.42766124	1	1101111101 (1) 1001111101	false
16397	547.02550712	1	1101111101 (1) 1101111100	false
16398	240.50512517	1	0101011011 (1) 1101011011	false
16399	191.51246395	1	0101011011 (1) 0001011011	false
16400	1855.07322552	1	0101011011 (1) 0101111011	false
16401	1498.43317783	1	0101011011 (1) 0101001011	false
16402	346.629863	1	0101011011 (1) 0101010011	false
16403	426.74157032	1	0101011011 (1) 0101011111	false
16404	232.57621339	1	0101011011 (1) 0101011010	false
16405	455.70181509	1	1101011011 (1) 0101011011	false
16406	355.17436545	1	1101011011 (1) 1001011011	false
16407	2122.34893148	1	1101011011 (1) 1101111011	false
16408	499.3770664	1	1101011011 (1) 1101001011	false
16409	352.28025358	1	1101011011 (1) 1101010011	false
16410	493.54534054	1	1101011011 (1) 1101011111	false
16411	227.31851793	1	1101011011 (1) 1101011010	false
16412	440.91214229	1	1001111101 (1) 0001111101	false
16413	4047.06037995	1	1001111101 (1) 1011111101	false
16414	12814.4693249	1	1001111101 (1) 1001011101	false
16415	1644.65767419	1	1001111101 (1) 1001111100	false
16416	1521.16538761	1	0001111101 (1) 1001111101	false
16417	2108.52475188	1	0001111101 (1) 0011111101	false
16418	6306.53936345	1	0001111101 (1) 0001011101	false
16419	1022.28696433	1	0001111101 (1) 0001111100	false
16420	1088.0012415	1	1110110110 (1) 0110110110	false
16421	356.00241219	1	1110110110 (1) 1010110110	false
16422	2448.73639145	1	1110110110 (1) 1100110110	false
16423	3979.36818443	1	1110110110 (1) 1110110010	false
16424	3277.25991981	1	1110110110 (1) 1110110100	false
16425	201.55030293	1	1110110110 (1) 1110110111	false
16426	2113.67885148	1	1110100111 (1) 0110100111	false
16427	2822.16277432	1	1110100111 (1) 1100100111	false
16428	4050.68516153	1	1110100111 (1) 1110110111	false
16429	2698.64503135	1	1110100111 (1) 1110100101	false
16430	3175.66618808	1	1110100111 (1) 1110100110	false
16431	189.08515645	1	1001011011 (1) 0001011011	false
16432	2425.73886588	1	1001011011 (1) 1001001011	false
16433	520.1356879	1	1001011011 (1) 1001010011	false
16434	1859.24358744	1	1001011011 (1) 1001011111	false
16435	322.79268919	1	1001011011 (1) 1001011010	false
16436	623.23301974	1	0001011011 (1) 1001011011	false
16437	800.81929371	1	0001011011 (1) 0001001011	false
16438	460.41639329	1	0001011011 (1) 0001010011	false
16439	1220.15487556	1	0001011011 (1) 0001011111	false
16440	244.34233364	1	0001011011 (1) 0001011010	false
16441	407.03230522	1	0110110110 (1) 1110110110	false
16442	296.41916018	1	0110110110 (1) 0010110110	false
16443	1652.68485639	1	0110110110 (1) 0100110110	false
16444	2855.63486385	1	0110110110 (1) 0110110010	false
16445	2512.07822254	1	0110110110 (1) 0110110100	false
16446	155.02615209	1	0110110110 (1) 0110110111	false
16447	227.96932845	1	0110100111 (1) 1110100111	false
16448	277.36216187	1	0110100111 (1) 0010100111	false
16449	1773.1528748	1	0110100111 (1) 0100100111	false
16450	1700.29418203	1	0110100111 (1) 0110110111	false
16451	1325.64655053	1	0110100111 (1) 0110100101	false
16452	1756.35284271	1	0110100111 (1) 0110100110	false
16453	386.1694419	1	1010110110 (1) 0010110110	false
16454	3942.63178507	1	1010110110 (1) 1010110010	false
16455	3006.89899235	1	1010110110 (1) 1010110100	false
16456	118.15635083	1	1010110110 (1) 1010110111	false
16457	178.9738148	1	1010100111 (1) 0010100111	false
16458	5415.84794288	1	1010100111 (1) 1110100111	false
16459	520.33422202	1	1010100111 (1) 1010110111	false
16460	1731.24099185	1	1010100111 (1) 1010100101	false
16461	2585.64583837	1	1010100111 (1) 1010100110	false
16462	625.22631026	1	0010110110 (1) 1010110110	false
16463	3866.67654057	1	0010110110 (1) 0010110010	false
16464	2721.3013567	1	0010110110 (1) 0010110100	false
16465	114.58978313	1	0010110110 (1) 0010110111	false
16466	1904.54773168	1	0010100111 (1) 1010100111	false
16467	689.71284521	1	0010100111 (1) 0010110111	false
16468	984.05899365	1	0010100111 (1) 0010100101	false
16469	1615.88878141	1	0010100111 (1) 0010100110	false
16470	363.68111893	1	0110111101 (1) 1110111101	false
16471	245.37372296	1	0110111101 (1) 0010111101	false
16472	2151.85012856	1	0110111101 (1) 0100111101	false
16473	5016.12281817	1	0110111101 (1) 0110011101	false
16474	780.74459353	1	0110111101 (1) 0110111100	false
16475	1196.33146896	1	1110111101 (1) 0110111101	false
16476	306.24105667	1	1110111101 (1) 1010111101	false
16477	3100.37197646	1	1110111101 (1) 1100111101	false
16478	6479.71879035	1	1110111101 (1) 1110011101	false
16479	986.528111	1	1110111101 (1) 1110111100	false
16480	207.46198086	1	0111111010 (1) 1111111010	false
16481	611.19301112	1	0111111010 (1) 0011111010	false
16482	196.00721982	1	0111111010 (1) 0101111010	false
16483	1731.35858564	1	0111111010 (1) 0110111010	false
16484	296.0087406	1	0111111010 (1) 0111110010	false
16485	455.36314732	1	0111111010 (1) 0111111110	false
16486	317.2731566	1	0111111010 (1) 0111111000	false
16487	516.905412	1	0111111010 (1) 0111111011	false
16488	147.97949307	1	0111101011 (1) 1111101011	false
16489	1679.75803087	1	0111101011 (1) 0011101011	false
16490	356.08920593	1	0111101011 (1) 0101101011	false
16491	3456.90922918	1	0111101011 (1) 0110101011	false
16492	1622.70448648	1	0111101011 (1) 0111111011	false
16493	492.78382409	1	0111101011 (1) 0111100011	false
16494	652.38355044	1	0111101011 (1) 0111101111	false
16495	660.32297839	1	0111101011 (1) 0111101001	false
16496	286.51038796	1	0111101011 (1) 0111101010	false
16497	1044.40898223	1	1111111010 (1) 0111111010	false
16498	1235.51352676	1	1111111010 (1) 1011111010	false
16499	287.52271021	1	1111111010 (1) 1101111010	false
16500	3252.19612248	1	1111111010 (1) 1110111010	false
16501	396.43076632	1	1111111010 (1) 1111110010	false
16502	741.99413226	1	1111111010 (1) 1111111110	false
16503	472.43869646	1	1111111010 (1) 1111111000	false
16504	865.0806732	1	1111111010 (1) 1111111011	false
16505	3377.7874206	1	1111101011 (1) 0111101011	false
16506	363.95686572	1	1111101011 (1) 1101101011	false
16507	6444.1143172	1	1111101011 (1) 1110101011	false
16508	4276.92819415	1	1111101011 (1) 1111111011	false
16509	805.89642469	1	1111101011 (1) 1111100011	false
16510	982.89963844	1	1111101011 (1) 1111101111	false
16511	978.29032941	1	1111101011 (1) 1111101001	false
16512	505.98712974	1	1111101011 (1) 1111101010	false
16513	170.6302698	1	0110011011 (1) 1110011011	false
16514	213.48967507	1	0110011011 (1) 0010011011	false
16515	1140.95681746	1	0110011011 (1) 0100011011	false
16516	405.84028365	1	0110011011 (1) 0110001011	false
16517	378.09841053	1	0110011011 (1) 0110010011	false
16518	455.49264785	1	0110011011 (1) 0110011111	false
16519	186.51435835	1	0110011011 (1) 0110011010	false
16520	924.14180254	1	1100110110 (1) 0100110110	false
16521	1938.48320062	1	1100110110 (1) 1000110110	false
16522	884.50973559	1	1100110110 (1) 1101110110	false
16523	4180.20702496	1	1100110110 (1) 1100110010	false
16524	3758.84541047	1	1100110110 (1) 1100110100	false
16525	214.65584573	1	1100110110 (1) 1100110111	false
16526	1624.41455685	1	1100100111 (1) 0100100111	false
16527	735.80689152	1	1100100111 (1) 1101100111	false
16528	3354.47822243	1	1100100111 (1) 1100110111	false
16529	2202.85300636	1	1100100111 (1) 1100100101	false
16530	2485.80650432	1	1100100111 (1) 1100100110	false
16531	396.60990349	1	1110011011 (1) 0110011011	false
16532	282.18724416	1	1110011011 (1) 1010011011	false
16533	1191.19538592	1	1110011011 (1) 1100011011	false
16534	268.52427727	1	1110011011 (1) 1110001011	false
16535	397.25712864	1	1110011011 (1) 1110010011	false
16536	478.12166968	1	1110011011 (1) 1110011111	false
16537	195.91126822	1	1110011011 (1) 1110011010	false
16538	509.72656919	1	0100110110 (1) 1100110110	false
16539	1278.73963893	1	0100110110 (1) 0000110110	false
16540	619.54635257	1	0100110110 (1) 0101110110	false
16541	3241.78308356	1	0100110110 (1) 0100110010	false
16542	3043.13306139	1	0100110110 (1) 0100110100	false
16543	173.16834039	1	0100110110 (1) 0100110111	false
16544	242.74105136	1	0100100111 (1) 1100100111	false
16545	1842.04462193	1	0100100111 (1) 0000100111	false
16546	753.05239216	1	0100100111 (1) 0101100111	false
16547	1745.61556314	1	0100100111 (1) 0100110111	false
16548	1561.45689793	1	0100100111 (1) 0100100101	false
16549	1992.5806938	1	0100100111 (1) 0100100110	false
16550	248.71712022	1	1010111101 (1) 0010111101	false
16551	5309.21689974	1	1010111101 (1) 1010011101	false
16552	731.84854788	1	1010111101 (1) 1010111100	false
16553	719.82855271	1	0010111101 (1) 1010111101	false
16554	3348.23618101	1	0010111101 (1) 0010011101	false
16555	591.37152857	1	0010111101 (1) 0010111100	false
16556	321.38903395	1	1011111010 (1) 0011111010	false
16557	1272.21119138	1	1011111010 (1) 1010111010	false
16558	2335.02637083	1	1011111010 (1) 1011011010	false
16559	364.13403191	1	1011111010 (1) 1011110010	false
16560	505.74441653	1	1011111010 (1) 1011111110	false
16561	647.20085263	1	1011111010 (1) 1011111000	false
16562	556.83825479	1	1011111010 (1) 1011111011	false
16563	79.80629671	1	1011101011 (1) 0011101011	false
16564	2584.10780076	1	1011101011 (1) 1111101011	false
16565	1620.24399868	1	1011101011 (1) 1010101011	false
16566	331.0449651	1	1011101011 (1) 1011001011	false
16567	188.42984609	1	1011101011 (1) 1011111011	false
16568	462.67788042	1	1011101011 (1) 1011100011	false
16569	544.89317022	1	1011101011 (1) 1011101111	false
16570	669.03047482	1	1011101011 (1) 1011101001	false
16571	247.41402754	1	1011101011 (1) 1011101010	false
16572	543.85381031	1	0011111010 (1) 1011111010	false
16573	1159.64449911	1	0011111010 (1) 0010111010	false
16574	1408.85781432	1	0011111010 (1) 0011011010	false
16575	312.1571505	1	0011111010 (1) 0011110010	false
16576	424.69880867	1	0011111010 (1) 0011111110	false
16577	479.88322756	1	0011111010 (1) 0011111000	false
16578	479.17534935	1	0011111010 (1) 0011111011	false
16579	3045.54158892	1	0011101011 (1) 1011101011	false
16580	1860.1411981	1	0011101011 (1) 0010101011	false
16581	352.26771054	1	0011101011 (1) 0011001011	false
16582	631.04753211	1	0011101011 (1) 0011111011	false
16583	467.30460438	1	0011101011 (1) 0011100011	false
16584	587.04795203	1	0011101011 (1) 0011101111	false
16585	782.08277745	1	0011101011 (1) 0011101001	false
16586	265.02286556	1	0011101011 (1) 0011101010	false
16587	234.38300879	1	1010011011 (1) 0010011011	false
16588	1994.78333261	1	1010011011 (1) 1000011011	false
16589	1354.42196964	1	1010011011 (1) 1010001011	false
16590	603.52205322	1	1010011011 (1) 1010010011	false
16591	391.17085547	1	1010011011 (1) 1010011111	false
16592	267.20874089	1	1010011011 (1) 1010011010	false
16593	513.45954637	1	0010011011 (1) 1010011011	false
16594	1680.47333327	1	0010011011 (1) 0000011011	false
16595	715.26706184	1	0010011011 (1) 0010001011	false
16596	527.24879767	1	0010011011 (1) 0010010011	false
16597	308.98228967	1	0010011011 (1) 0010011111	false
16598	232.48448328	1	0010011011 (1) 0010011010	false
16599	640.18984024	1	0000110110 (1) 1000110110	false
16600	424.19465365	1	0000110110 (1) 0010110110	false
16601	1051.77475303	1	0000110110 (1) 0001110110	false
16602	3004.97388499	1	0000110110 (1) 0000110010	false
16603	2683.8887693	1	0000110110 (1) 0000110100	false
16604	136.02119431	1	0000110110 (1) 0000110111	false
16605	1469.76884237	1	0000100111 (1) 1000100111	false
16606	552.90038424	1	0000100111 (1) 0010100111	false
16607	1052.39681605	1	0000100111 (1) 0001100111	false
16608	1221.95470748	1	0000100111 (1) 0000110111	false
16609	1476.26536167	1	0000100111 (1) 0000100101	false
16610	2115.08468553	1	0000100111 (1) 0000100110	false
16611	436.3613963	1	1000110110 (1) 0000110110	false
16612	457.61541463	1	1000110110 (1) 1010110110	false
16613	1240.47426763	1	1000110110 (1) 1001110110	false
16614	2925.27419774	1	1000110110 (1) 1000110010	false
16615	3080.91148953	1	1000110110 (1) 1000110100	false
16616	148.02091546	1	1000110110 (1) 1000110111	false
16617	215.97303774	1	1000100111 (1) 0000100111	false
16618	1261.62203294	1	1000100111 (1) 1100100111	false
16619	857.07955943	1	1000100111 (1) 1010100111	false
16620	1064.80669794	1	1000100111 (1) 1001100111	false
16621	891.23040174	1	1000100111 (1) 1000110111	false
16622	1637.76013603	1	1000100111 (1) 1000100101	false
16623	2352.45208134	1	1000100111 (1) 1000100110	false
16624	162.88126617	1	0111100110 (1) 1111100110	false
16625	381.4730737	1	0111100110 (1) 0011100110	false
16626	317.14879319	1	0111100110 (1) 0101100110	false
16627	951.8599297	1	0111100110 (1) 0110100110	false
16628	1315.34544012	1	0111100110 (1) 0111110110	false
16629	1176.26856898	1	0111100110 (1) 0111100010	false
16630	871.30322567	1	0111100110 (1) 0111100100	false
16631	141.84844242	1	0111100110 (1) 0111100111	false
16632	105.9055981	1	0111000111 (1) 1111000111	false
16633	216.11310435	1	0111000111 (1) 0011000111	false
16634	236.99665232	1	0111000111 (1) 0101000111	false
16635	578.30137227	1	0111000111 (1) 0110000111	false
16636	1547.25448159	1	0111000111 (1) 0111100111	false
16637	758.66313009	1	0111000111 (1) 0111000110	false
16638	2138.97593414	1	1111100110 (1) 0111100110	false
16639	424.77627709	1	1111100110 (1) 1101100110	false
16640	2144.68759333	1	1111100110 (1) 1110100110	false
16641	3312.31246291	1	1111100110 (1) 1111110110	false
16642	2475.60456715	1	1111100110 (1) 1111100010	false
16643	1726.83055129	1	1111100110 (1) 1111100100	false
16644	262.05386739	1	1111100110 (1) 1111100111	false
16645	1945.75151162	1	1111000111 (1) 0111000111	false
16646	333.39360064	1	1111000111 (1) 1101000111	false
16647	1270.77357919	1	1111000111 (1) 1110000111	false
16648	3537.11285368	1	1111000111 (1) 1111100111	false
16649	1530.5986052	1	1111000111 (1) 1111000110	false
16650	1105.03312169	1	1100111101 (1) 0100111101	false
16651	2258.28776769	1	1100111101 (1) 1000111101	false
16652	586.18053221	1	1100111101 (1) 1101111101	false
16653	8644.28780975	1	1100111101 (1) 1100011101	false
16654	1101.9940836	1	1100111101 (1) 1100111100	false
16655	496.57778737	1	0100111101 (1) 1100111101	false
16656	1308.6518566	1	0100111101 (1) 0000111101	false
16657	334.55421501	1	0100111101 (1) 0101111101	false
16658	7399.02596008	1	0100111101 (1) 0100011101	false
16659	909.00259365	1	0100111101 (1) 0100111100	false
16660	375.47675188	1	0101111010 (1) 1101111010	false
16661	3319.76751647	1	0101111010 (1) 0001111010	false
16662	335.89848973	1	0101111010 (1) 0101110010	false
16663	599.13183657	1	0101111010 (1) 0101111110	false
16664	362.05956124	1	0101111010 (1) 0101111000	false
16665	539.71592993	1	0101111010 (1) 0101111011	false
16666	128.69335522	1	0101101011 (1) 1101101011	false
16667	10524.59584335	1	0101101011 (1) 0001101011	false
16668	1264.8047082	1	0101101011 (1) 0101111011	false
16669	779.57587356	1	0101101011 (1) 0101100011	false
16670	1123.93135827	1	0101101011 (1) 0101101111	false
16671	1210.83388777	1	0101101011 (1) 0101101001	false
16672	479.61939334	1	0101101011 (1) 0101101010	false
16673	489.5360076	1	1100011011 (1) 0100011011	false
16674	497.11744882	1	1100011011 (1) 1000011011	false
16675	2088.62866777	1	1100011011 (1) 1101011011	false
16676	419.83980925	1	1100011011 (1) 1100001011	false
16677	463.61142136	1	1100011011 (1) 1100010011	false
16678	652.1925583	1	1100011011 (1) 1100011111	false
16679	257.90770823	1	1100011011 (1) 1100011010	false
16680	681.95424355	1	1101111010 (1) 0101111010	false
16681	5547.79802028	1	1101111010 (1) 1001111010	false
16682	451.0657474	1	1101111010 (1) 1101110010	false
16683	884.73497159	1	1101111010 (1) 1101111110	false
16684	597.46373526	1	1101111010 (1) 1101111000	false
16685	798.01444952	1	1101111010 (1) 1101111011	false
16686	3512.39745435	1	1101101011 (1) 0101101011	false
16687	3239.57805459	1	1101101011 (1) 1101111011	false
16688	564.14676283	1	1101101011 (1) 1101100011	false
16689	741.96603953	1	1101101011 (1) 1101101111	false
16690	741.73643493	1	1101101011 (1) 1101101001	false
16691	329.40978271	1	1101101011 (1) 1101101010	false
16692	247.32634136	1	0100011011 (1) 1100011011	false
16693	341.61834527	1	0100011011 (1) 0000011011	false
16694	2114.56438795	1	0100011011 (1) 0101011011	false
16695	846.21981459	1	0100011011 (1) 0100001011	false
16696	447.17241199	1	0100011011 (1) 0100010011	false
16697	598.71562525	1	0100011011 (1) 0100011111	false
16698	252.34554955	1	0100011011 (1) 0100011010	false
16699	2481.30910519	1	0011100110 (1) 1011100110	false
16700	1036.85900985	1	0011100110 (1) 0010100110	false
16701	1197.59382099	1	0011100110 (1) 0011110110	false
16702	2869.221096	1	0011100110 (1) 0011100010	false
16703	1633.15691853	1	0011100110 (1) 0011100100	false
16704	171.6329245	1	0011100110 (1) 0011100111	false
16705	2230.46775582	1	0011000111 (1) 1011000111	false
16706	883.64525851	1	0011000111 (1) 0010000111	false
16707	3194.17865428	1	0011000111 (1) 0011100111	false
16708	1673.91796137	1	0011000111 (1) 0011000110	false
16709	766.97572914	1	0000111101 (1) 1000111101	false
16710	345.83505771	1	0000111101 (1) 0010111101	false
16711	1015.41997851	1	0000111101 (1) 0001111101	false
16712	3729.18624	1	0000111101 (1) 0000011101	false
16713	691.77571127	1	0000111101 (1) 0000111100	false
16714	348.60281082	1	1000111101 (1) 0000111101	false
16715	457.37159586	1	1000111101 (1) 1010111101	false
16716	1783.97983385	1	1000111101 (1) 1001111101	false
16717	5732.48597335	1	1000111101 (1) 1000011101	false
16718	906.26613585	1	1000111101 (1) 1000111100	false
16719	261.36589993	1	1011100110 (1) 0011100110	false
16720	5729.78455639	1	1011100110 (1) 1111100110	false
16721	1927.88980031	1	1011100110 (1) 1010100110	false
16722	1035.2366851	1	1011100110 (1) 1011110110	false
16723	4176.38764316	1	1011100110 (1) 1011100010	false
16724	2429.61930873	1	1011100110 (1) 1011100100	false
16725	265.94918909	1	1011100110 (1) 1011100111	false
16726	241.84064605	1	1011000111 (1) 0011000111	false
16727	5768.10381882	1	1011000111 (1) 1111000111	false
16728	1798.58600339	1	1011000111 (1) 1010000111	false
16729	5638.0623855	1	1011000111 (1) 1011100111	false
16730	2866.39988503	1	1011000111 (1) 1011000110	false
16731	90.89363689	1	1011101010 (1) 0011101010	false
16732	3049.31501214	1	1011101010 (1) 1111101010	false
16733	1782.25878128	1	1011101010 (1) 1010101010	false
16734	305.90957087	1	1011101010 (1) 1011001010	false
16735	318.37135203	1	1011101010 (1) 1011111010	false
16736	462.72910424	1	1011101010 (1) 1011100010	false
16737	714.53395378	1	1011101010 (1) 1011101000	false
16738	969.59799748	1	1011101010 (1) 1011101011	false
16739	402.94827754	1	1001111010 (1) 0001111010	false
16740	3654.59698557	1	1001111010 (1) 1011111010	false
16741	678.05679339	1	1001111010 (1) 1001011010	false
16742	392.28014652	1	1001111010 (1) 1001110010	false
16743	743.76620935	1	1001111010 (1) 1001111110	false
16744	644.29125668	1	1001111010 (1) 1001111000	false
16745	630.28819271	1	1001111010 (1) 1001111011	false
16746	75.52910356	1	1001101011 (1) 0001101011	false
16747	105.46974617	1	1001101011 (1) 1101101011	false
16748	2744.50887395	1	1001101011 (1) 1011101011	false
16749	76.75194735	1	1001101011 (1) 1001001011	false
16750	151.74672271	1	1001101011 (1) 1001111011	false
16751	330.5497569	1	1001101011 (1) 1001100011	false
16752	452.05140782	1	1001101011 (1) 1001101111	false
16753	484.24438159	1	1001101011 (1) 1001101001	false
16754	180.17302365	1	1001101011 (1) 1001101010	false
16755	3403.57547525	1	0011101010 (1) 1011101010	false
16756	2075.04672597	1	0011101010 (1) 0010101010	false
16757	303.4826304	1	0011101010 (1) 0011001010	false
16758	1031.29757493	1	0011101010 (1) 0011111010	false
16759	456.68163491	1	0011101010 (1) 0011100010	false
16760	835.04227791	1	0011101010 (1) 0011101000	false
16761	1169.94699026	1	0011101010 (1) 0011101011	false
16762	522.39551156	1	0001111010 (1) 1001111010	false
16763	2647.17708677	1	0001111010 (1) 0011111010	false
16764	509.28028177	1	0001111010 (1) 0001011010	false
16765	334.42728763	1	0001111010 (1) 0001110010	false
16766	608.87645079	1	0001111010 (1) 0001111110	false
16767	459.29572058	1	0001111010 (1) 0001111000	false
16768	531.25369899	1	0001111010 (1) 0001111011	false
16769	3582.39364622	1	0001101011 (1) 1001101011	false
16770	5092.94491125	1	0001101011 (1) 0011101011	false
16771	92.14935323	1	0001101011 (1) 0001001011	false
16772	783.29663606	1	0001101011 (1) 0001111011	false
16773	653.33623677	1	0001101011 (1) 0001100011	false
16774	924.84530264	1	0001101011 (1) 0001101111	false
16775	1086.64299545	1	0001101011 (1) 0001101001	false
16776	390.63989653	1	0001101011 (1) 0001101010	false
16777	234.23339625	1	1000011011 (1) 0000011011	false
16778	989.85379696	1	1000011011 (1) 1001011011	false
16779	1532.71732724	1	1000011011 (1) 1000001011	false
16780	709.23121389	1	1000011011 (1) 1000010011	false
16781	1652.59599873	1	1000011011 (1) 1000011111	false
16782	332.71529384	1	1000011011 (1) 1000011010	false
16783	577.73585997	1	0000011011 (1) 1000011011	false
16784	644.20250542	1	0000011011 (1) 0001011011	false
16785	762.64315066	1	0000011011 (1) 0000001011	false
16786	630.76733685	1	0000011011 (1) 0000010011	false
16787	1341.71980323	1	0000011011 (1) 0000011111	false
16788	277.53001898	1	0000011011 (1) 0000011010	false
16789	197.1788282	1	1111011110 (1) 0111011110	false
16790	112.77411433	1	1111011110 (1) 1011011110	false
16791	148.80845793	1	1111011110 (1) 1101011110	false
16792	178.48218337	1	1111011110 (1) 1110011110	false
16793	425.76611711	1	1111011110 (1) 1111111110	false
16794	567.5702801	1	1111011110 (1) 1111001110	false
16795	412.06741817	1	1111011110 (1) 1111010110	false
16796	98.71683733	1	1111011110 (1) 1111011111	false
16797	156.83096757	1	1111011101 (1) 0111011101	false
16798	99.16717257	1	1111011101 (1) 1011011101	false
16799	116.87127928	1	1111011101 (1) 1101011101	false
16800	153.89079916	1	1111011101 (1) 1110011101	false
16801	47.22647445	1	1111011101 (1) 1111111101	false
16802	406.31188774	1	1111011101 (1) 1111001101	false
16803	388.97290712	1	1111011101 (1) 1111011111	false
16804	258.46368793	1	1111011101 (1) 1111011100	false
16805	150.70926864	1	0111011110 (1) 1111011110	false
16806	84.17011432	1	0111011110 (1) 0011011110	false
16807	150.97863299	1	0111011110 (1) 0101011110	false
16808	176.05599564	1	0111011110 (1) 0110011110	false
16809	396.32720304	1	0111011110 (1) 0111111110	false
16810	771.06008824	1	0111011110 (1) 0111001110	false
16811	407.25923844	1	0111011110 (1) 0111010110	false
16812	102.00556329	1	0111011110 (1) 0111011111	false
16813	113.13343751	1	0111011101 (1) 1111011101	false
16814	71.43527186	1	0111011101 (1) 0011011101	false
16815	118.16459276	1	0111011101 (1) 0101011101	false
16816	153.48567202	1	0111011101 (1) 0110011101	false
16817	47.22647445	1	0111011101 (1) 0111111101	false
16818	532.97876625	1	0111011101 (1) 0111001101	false
16819	402.17680377	1	0111011101 (1) 0111011111	false
16820	275.04097676	1	0111011101 (1) 0111011100	false
16821	162.47449476	1	0101100110 (1) 1101100110	false
16822	2798.33707409	1	0101100110 (1) 0001100110	false
16823	947.24934606	1	0101100110 (1) 0101110110	false
16824	1183.98761259	1	0101100110 (1) 0101100010	false
16825	939.50288644	1	0101100110 (1) 0101100100	false
16826	163.07667881	1	0101100110 (1) 0101100111	false
16827	125.42716005	1	0101000111 (1) 1101000111	false
16828	1999.28884708	1	0101000111 (1) 0001000111	false
16829	1770.1840761	1	0101000111 (1) 0101100111	false
16830	936.96610189	1	0101000111 (1) 0101000110	false
16831	345.12363373	1	1011011110 (1) 0011011110	false
16832	922.03906408	1	1011011110 (1) 1010011110	false
16833	13939.30053723	1	1011011110 (1) 1011001110	false
16834	3012.75751845	1	1011011110 (1) 1011010110	false
16835	499.75069897	1	1011011110 (1) 1011011111	false
16836	340.39442548	1	1011011101 (1) 0011011101	false
16837	1063.42743477	1	1011011101 (1) 1010011101	false
16838	17929.71682887	1	1011011101 (1) 1011001101	false
16839	4453.55147076	1	1011011101 (1) 1011011111	false
16840	2626.49476407	1	1011011101 (1) 1011011100	false
16841	1387.32784889	1	1101100110 (1) 0101100110	false
16842	1959.07869527	1	1101100110 (1) 1101110110	false
16843	954.85077498	1	1101100110 (1) 1101100010	false
16844	981.10358399	1	1101100110 (1) 1101100100	false
16845	164.38831934	1	1101100110 (1) 1101100111	false
16846	1251.56377515	1	1101000111 (1) 0101000111	false
16847	2075.39778095	1	1101000111 (1) 1101100111	false
16848	885.0645834	1	1101000111 (1) 1101000110	false
16849	1839.65941744	1	0011011110 (1) 1011011110	false
16850	725.87198665	1	0011011110 (1) 0010011110	false
16851	2782.82691568	1	0011011110 (1) 0011001110	false
16852	2699.37827353	1	0011011110 (1) 0011010110	false
16853	274.92895623	1	0011011110 (1) 0011011111	false
16854	2338.24771039	1	0011011101 (1) 1011011101	false
16855	706.90059104	1	0011011101 (1) 0010011101	false
16856	3703.36618903	1	0011011101 (1) 0011001101	false
16857	2035.23318625	1	0011011101 (1) 0011011111	false
16858	1154.03205906	1	0011011101 (1) 0011011100	false
16859	248.55953239	1	1001100110 (1) 0001100110	false
16860	521.29013021	1	1001100110 (1) 1101100110	false
16861	3882.86480724	1	1001100110 (1) 1011100110	false
16862	940.63487883	1	1001100110 (1) 1001110110	false
16863	2957.33421342	1	1001100110 (1) 1001100010	false
16864	1751.12354019	1	1001100110 (1) 1001100100	false
16865	185.14454896	1	1001100110 (1) 1001100111	false
16866	323.37324162	1	1001000111 (1) 0001000111	false
16867	856.34162408	1	1001000111 (1) 1101000111	false
16868	6374.79976386	1	1001000111 (1) 1011000111	false
16869	5707.88218541	1	1001000111 (1) 1001100111	false
16870	2791.6305472	1	1001000111 (1) 1001000110	false
16871	2057.71124338	1	0001100110 (1) 1001100110	false
16872	2870.20925736	1	0001100110 (1) 0011100110	false
16873	1290.59831763	1	0001100110 (1) 0001110110	false
16874	2863.69692524	1	0001100110 (1) 0001100010	false
16875	1745.39073822	1	0001100110 (1) 0001100100	false
16876	201.39911251	1	0001100110 (1) 0001100111	false
16877	2290.25305374	1	0001000111 (1) 1001000111	false
16878	3262.86014392	1	0001000111 (1) 0011000111	false
16879	4646.43149252	1	0001000111 (1) 0001100111	false
16880	2268.29111008	1	0001000111 (1) 0001000110	false
16881	189.00402233	1	0110111010 (1) 1110111010	false
16882	276.59605218	1	0110111010 (1) 0010111010	false
16883	1792.82460159	1	0110111010 (1) 0100111010	false
16884	875.87152223	1	0110111010 (1) 0110011010	false
16885	292.05878279	1	0110111010 (1) 0110110010	false
16886	474.12504419	1	0110111010 (1) 0110111110	false
16887	378.15214972	1	0110111010 (1) 0110111000	false
16888	535.04330081	1	0110111010 (1) 0110111011	false
16889	119.1493277	1	0110101011 (1) 1110101011	false
16890	612.30568413	1	0110101011 (1) 0010101011	false
16891	3139.23080423	1	0110101011 (1) 0100101011	false
16892	112.66831608	1	0110101011 (1) 0110001011	false
16893	1192.1387386	1	0110101011 (1) 0110111011	false
16894	361.37815303	1	0110101011 (1) 0110100011	false
16895	488.11461359	1	0110101011 (1) 0110101111	false
16896	518.09951172	1	0110101011 (1) 0110101001	false
16897	206.50490608	1	0110101011 (1) 0110101010	false
16898	141.63813026	1	0110101010 (1) 1110101010	false
16899	717.53737307	1	0110101010 (1) 0010101010	false
16900	4008.55442589	1	0110101010 (1) 0100101010	false
16901	105.06737057	1	0110101010 (1) 0110001010	false
16902	1932.29797673	1	0110101010 (1) 0110111010	false
16903	378.14044624	1	0110101010 (1) 0110100010	false
16904	613.04039254	1	0110101010 (1) 0110101000	false
16905	1224.30980517	1	0110101010 (1) 0110101011	false
16906	983.44702065	1	1110111010 (1) 0110111010	false
16907	520.83606968	1	1110111010 (1) 1010111010	false
16908	3001.25855653	1	1110111010 (1) 1100111010	false
16909	1281.21288718	1	1110111010 (1) 1110011010	false
16910	384.75680475	1	1110111010 (1) 1110110010	false
16911	699.49887202	1	1110111010 (1) 1110111110	false
16912	511.85567005	1	1110111010 (1) 1110111000	false
16913	829.83562978	1	1110111010 (1) 1110111011	false
16914	2100.37102082	1	1110101011 (1) 0110101011	false
16915	3310.54235199	1	1110101011 (1) 1100101011	false
16916	129.92601159	1	1110101011 (1) 1110001011	false
16917	2724.03028141	1	1110101011 (1) 1110111011	false
16918	554.09621063	1	1110101011 (1) 1110100011	false
16919	676.63745195	1	1110101011 (1) 1110101111	false
16920	741.41637657	1	1110101011 (1) 1110101001	false
16921	320.1120802	1	1110101011 (1) 1110101010	false
16922	515.04025191	1	1101011110 (1) 0101011110	false
16923	1865.1673951	1	1101011110 (1) 1001011110	false
16924	1791.73003627	1	1101011110 (1) 1101111110	false
16925	837.0692412	1	1101011110 (1) 1101001110	false
16926	1015.68975158	1	1101011110 (1) 1101010110	false
16927	268.22817168	1	1101011110 (1) 1101011111	false
16928	477.01538815	1	1101011101 (1) 0101011101	false
16929	1650.9644311	1	1101011101 (1) 1001011101	false
16930	92.64675664	1	1101011101 (1) 1101111101	false
16931	773.73653932	1	1101011101 (1) 1101001101	false
16932	1676.98614704	1	1101011101 (1) 1101011111	false
16933	569.77976984	1	1101011101 (1) 1101011100	false
16934	366.62341463	1	0101011110 (1) 1101011110	false
16935	841.0245471	1	0101011110 (1) 0001011110	false
16936	1556.04902503	1	0101011110 (1) 0101111110	false
16937	2170.98262987	1	0101011110 (1) 0101001110	false
16938	912.2390767	1	0101011110 (1) 0101010110	false
16939	258.53840023	1	0101011110 (1) 0101011111	false
16940	308.46023617	1	0101011101 (1) 1101011101	false
16941	772.14113496	1	0101011101 (1) 0001011101	false
16942	92.56472088	1	0101011101 (1) 0101111101	false
16943	1855.667342	1	0101011101 (1) 0101001101	false
16944	1575.15252595	1	0101011101 (1) 0101011111	false
16945	580.41414943	1	0101011101 (1) 0101011100	false
16946	278.32483394	1	0010111010 (1) 1010111010	false
16947	1119.19837662	1	0010111010 (1) 0010011010	false
16948	195.62184282	1	0010111010 (1) 0010110010	false
16949	274.30401698	1	0010111010 (1) 0010111110	false
16950	360.29863881	1	0010111010 (1) 0010111000	false
16951	286.61892199	1	0010111010 (1) 0010111011	false
16952	1590.84352288	1	0010101011 (1) 1010101011	false
16953	297.81010692	1	0010101011 (1) 0010001011	false
16954	367.57507487	1	0010101011 (1) 0010111011	false
16955	266.78614484	1	0010101011 (1) 0010100011	false
16956	301.57301223	1	0010101011 (1) 0010101111	false
16957	433.04514297	1	0010101011 (1) 0010101001	false
16958	134.96330218	1	0010101011 (1) 0010101010	false
16959	2714.42512847	1	1110101010 (1) 0110101010	false
16960	4463.63323932	1	1110101010 (1) 1100101010	false
16961	122.08528994	1	1110101010 (1) 1110001010	false
16962	4541.1152634	1	1110101010 (1) 1110111010	false
16963	585.1032837	1	1110101010 (1) 1110100010	false
16964	934.03286536	1	1110101010 (1) 1110101000	false
16965	1772.48266932	1	1110101010 (1) 1110101011	false
16966	195.08306746	1	1010111010 (1) 0010111010	false
16967	1232.36792808	1	1010111010 (1) 1010011010	false
16968	201.65277009	1	1010111010 (1) 1010110010	false
16969	316.41359636	1	1010111010 (1) 1010111110	false
16970	406.61275842	1	1010111010 (1) 1010111000	false
16971	296.50258549	1	1010111010 (1) 1010111011	false
16972	64.40461096	1	1010101011 (1) 0010101011	false
16973	2253.38547093	1	1010101011 (1) 1110101011	false
16974	280.58556172	1	1010101011 (1) 1010001011	false
16975	166.74236242	1	1010101011 (1) 1010111011	false
16976	337.42678624	1	1010101011 (1) 1010100011	false
16977	381.80680233	1	1010101011 (1) 1010101111	false
16978	493.44765351	1	1010101011 (1) 1010101001	false
16979	170.89342441	1	1010101011 (1) 1010101010	false
16980	275.7661457	1	0111110011 (1) 1111110011	false
16981	603.04175968	1	0111110011 (1) 0011110011	false
16982	218.93525256	1	0111110011 (1) 0101110011	false
16983	1348.8190491	1	0111110011 (1) 0110110011	false
16984	276.22709097	1	0111110011 (1) 0111110111	false
16985	1246.33538014	1	0111110011 (1) 0111110001	false
16986	165.59836258	1	0111110011 (1) 0111110010	false
16987	738.24168186	1	1111110011 (1) 0111110011	false
16988	979.72293483	1	1111110011 (1) 1011110011	false
16989	288.70831568	1	1111110011 (1) 1101110011	false
16990	2076.95380386	1	1111110011 (1) 1110110011	false
16991	340.91110707	1	1111110011 (1) 1111110111	false
16992	1804.21563529	1	1111110011 (1) 1111110001	false
16993	218.25724096	1	1111110011 (1) 1111110010	false
16994	434.65534654	1	1001011110 (1) 0001011110	false
16995	6311.72945886	1	1001011110 (1) 1011011110	false
16996	7945.94401031	1	1001011110 (1) 1001001110	false
16997	3350.8565148	1	1001011110 (1) 1001010110	false
16998	536.23529971	1	1001011110 (1) 1001011111	false
16999	438.9341774	1	1001011101 (1) 0001011101	false
17000	6649.75543917	1	1001011101 (1) 1011011101	false
17001	10710.57469683	1	1001011101 (1) 1001001101	false
17002	3887.34918321	1	1001011101 (1) 1001011111	false
17003	2270.08981857	1	1001011101 (1) 1001011100	false
17004	1670.66374139	1	0001011110 (1) 1001011110	false
17005	2600.95336841	1	0001011110 (1) 0011011110	false
17006	2512.86198244	1	0001011110 (1) 0001001110	false
17007	3009.38293756	1	0001011110 (1) 0001010110	false
17008	347.38921736	1	0001011110 (1) 0001011111	false
17009	1983.19008556	1	0001011101 (1) 1001011101	false
17010	2523.91587303	1	0001011101 (1) 0011011101	false
17011	3534.82650906	1	0001011101 (1) 0001001101	false
17012	2280.66034951	1	0001011101 (1) 0001011111	false
17013	1192.5380083	1	0001011101 (1) 0001011100	false
17014	289.54425903	1	0110100110 (1) 1110100110	false
17015	377.07688759	1	0110100110 (1) 0010100110	false
17016	2399.32191879	1	0110100110 (1) 0100100110	false
17017	2096.929726	1	0110100110 (1) 0110110110	false
17018	3050.58979729	1	0110100110 (1) 0110100010	false
17019	1616.96505037	1	0110100110 (1) 0110100100	false
17020	184.41969969	1	0110100110 (1) 0110100111	false
17021	247.87842314	1	0110000111 (1) 1110000111	false
17022	340.08382969	1	0110000111 (1) 0010000111	false
17023	1813.26930514	1	0110000111 (1) 0100000111	false
17024	3577.37852664	1	0110000111 (1) 0110100111	false
17025	1546.28110536	1	0110000111 (1) 0110000110	false
17026	730.72311306	1	0011110011 (1) 1011110011	false
17027	879.61360097	1	0011110011 (1) 0010110011	false
17028	1790.64751043	1	0011110011 (1) 0011010011	false
17029	189.06489876	1	0011110011 (1) 0011110111	false
17030	2400.15108273	1	0011110011 (1) 0011110001	false
17031	189.60105897	1	0011110011 (1) 0011110010	false
17032	2919.6622438	1	1110100110 (1) 0110100110	false
17033	3857.5691221	1	1110100110 (1) 1100100110	false
17034	5505.87427629	1	1110100110 (1) 1110110110	false
17035	5998.36910893	1	1110100110 (1) 1110100010	false
17036	3363.86485773	1	1110100110 (1) 1110100100	false
17037	332.33500638	1	1110100110 (1) 1110100111	false
17038	2180.00959643	1	1110000111 (1) 0110000111	false
17039	2500.92790202	1	1110000111 (1) 1100000111	false
17040	6640.39141472	1	1110000111 (1) 1110100111	false
17041	2496.81998249	1	1110000111 (1) 1110000110	false
17042	330.2192401	1	1011110011 (1) 0011110011	false
17043	949.79701203	1	1011110011 (1) 1010110011	false
17044	2880.89001259	1	1011110011 (1) 1011010011	false
17045	203.1639611	1	1011110011 (1) 1011110111	false
17046	3353.47589404	1	1011110011 (1) 1011110001	false
17047	232.10254842	1	1011110011 (1) 1011110010	false
17048	199.21770536	1	0100111010 (1) 1100111010	false
17049	1195.81335742	1	0100111010 (1) 0000111010	false
17050	233.14778701	1	0100111010 (1) 0101111010	false
17051	731.88434261	1	0100111010 (1) 0100011010	false
17052	249.74878665	1	0100111010 (1) 0100110010	false
17053	418.38733274	1	0100111010 (1) 0100111110	false
17054	324.65759391	1	0100111010 (1) 0100111000	false
17055	430.50336525	1	0100111010 (1) 0100111011	false
17056	86.42704311	1	0100101011 (1) 1100101011	false
17057	2874.759698	1	0100101011 (1) 0000101011	false
17058	363.3518141	1	0100101011 (1) 0101101011	false
17059	103.78561127	1	0100101011 (1) 0100001011	false
17060	759.60007547	1	0100101011 (1) 0100111011	false
17061	330.95724965	1	0100101011 (1) 0100100011	false
17062	460.45402246	1	0100101011 (1) 0100101111	false
17063	449.45449101	1	0100101011 (1) 0100101001	false
17064	180.95518	1	0100101011 (1) 0100101010	false
17065	102.9432643	1	0100101010 (1) 1100101010	false
17066	3405.51820319	1	0100101010 (1) 0000101010	false
17067	405.52775278	1	0100101010 (1) 0101101010	false
17068	91.92171456	1	0100101010 (1) 0100001010	false
17069	1204.56542383	1	0100101010 (1) 0100111010	false
17070	345.2017371	1	0100101010 (1) 0100100010	false
17071	504.64436444	1	0100101010 (1) 0100101000	false
17072	1019.71330877	1	0100101010 (1) 0100101011	false
17073	639.7938525	1	1100111010 (1) 0100111010	false
17074	1936.09857631	1	1100111010 (1) 1000111010	false
17075	343.4959392	1	1100111010 (1) 1101111010	false
17076	888.92041389	1	1100111010 (1) 1100011010	false
17077	307.46199539	1	1100111010 (1) 1100110010	false
17078	547.50402943	1	1100111010 (1) 1100111110	false
17079	411.57014169	1	1100111010 (1) 1100111000	false
17080	599.93820202	1	1100111010 (1) 1100111011	false
17081	1482.80107208	1	1100101011 (1) 0100101011	false
17082	245.35777651	1	1100101011 (1) 1101101011	false
17083	92.77575463	1	1100101011 (1) 1100001011	false
17084	1401.96160161	1	1100101011 (1) 1100111011	false
17085	314.55028909	1	1100101011 (1) 1100100011	false
17086	385.54848854	1	1100101011 (1) 1100101111	false
17087	403.84564509	1	1100101011 (1) 1100101001	false
17088	167.49243256	1	1100101011 (1) 1100101010	false
17089	266.10016702	1	1010100110 (1) 0010100110	false
17090	7586.80918927	1	1010100110 (1) 1110100110	false
17091	759.21943197	1	1010100110 (1) 1010110110	false
17092	4961.83405345	1	1010100110 (1) 1010100010	false
17093	2426.55810631	1	1010100110 (1) 1010100100	false
17094	232.93125487	1	1010100110 (1) 1010100111	false
17095	227.90393201	1	1010000111 (1) 0010000111	false
17096	5659.19730327	1	1010000111 (1) 1110000111	false
17097	5619.59361619	1	1010000111 (1) 1010100111	false
17098	2708.38202441	1	1010000111 (1) 1010000110	false
17099	2508.80795051	1	0010100110 (1) 1010100110	false
17100	1025.68177302	1	0010100110 (1) 0010110110	false
17101	3123.57145421	1	0010100110 (1) 0010100010	false
17102	1447.83373256	1	0010100110 (1) 0010100100	false
17103	138.38609878	1	0010100110 (1) 0010100111	false
17104	2205.82005856	1	0010000111 (1) 1010000111	false
17105	3016.1721359	1	0010000111 (1) 0010100111	false
17106	1627.92782374	1	0010000111 (1) 0010000110	false
17107	1776.31008912	1	1100101010 (1) 0100101010	false
17108	291.71182527	1	1100101010 (1) 1101101010	false
17109	86.54738306	1	1100101010 (1) 1100001010	false
17110	2287.2734587	1	1100101010 (1) 1100111010	false
17111	331.77909735	1	1100101010 (1) 1100100010	false
17112	480.76235471	1	1100101010 (1) 1100101000	false
17113	877.07066776	1	1100101010 (1) 1100101011	false
17114	73.95314536	1	1010101010 (1) 0010101010	false
17115	2658.78185558	1	1010101010 (1) 1110101010	false
17116	226.80275017	1	1010101010 (1) 1010001010	false
17117	280.32980091	1	1010101010 (1) 1010111010	false
17118	346.14558565	1	1010101010 (1) 1010100010	false
17119	518.95012496	1	1010101010 (1) 1010101000	false
17120	704.07622801	1	1010101010 (1) 1010101011	false
17121	82.91643059	1	1001101010 (1) 0001101010	false
17122	126.44204142	1	1001101010 (1) 1101101010	false
17123	3057.85072407	1	1001101010 (1) 1011101010	false
17124	66.10535638	1	1001101010 (1) 1001001010	false
17125	254.67881733	1	1001101010 (1) 1001111010	false
17126	326.34418708	1	1001101010 (1) 1001100010	false
17127	500.67975142	1	1001101010 (1) 1001101000	false
17128	738.78918522	1	1001101010 (1) 1001101011	false
17129	241.66931437	1	1000111010 (1) 0000111010	false
17130	171.61727796	1	1000111010 (1) 1010111010	false
17131	540.38146134	1	1000111010 (1) 1001111010	false
17132	351.10084169	1	1000111010 (1) 1000011010	false
17133	180.53865085	1	1000111010 (1) 1000110010	false
17134	406.73998075	1	1000111010 (1) 1000111110	false
17135	279.35843927	1	1000111010 (1) 1000111000	false
17136	302.11925766	1	1000111010 (1) 1000111011	false
17137	71.95819984	1	1000101011 (1) 0000101011	false
17138	252.29299726	1	1000101011 (1) 1100101011	false
17139	265.52892294	1	1000101011 (1) 1010101011	false
17140	311.84213225	1	1000101011 (1) 1001101011	false
17141	56.20555846	1	1000101011 (1) 1000001011	false
17142	111.7458154	1	1000101011 (1) 1000111011	false
17143	206.38255172	1	1000101011 (1) 1000100011	false
17144	277.39334698	1	1000101011 (1) 1000101111	false
17145	267.30499578	1	1000101011 (1) 1000101001	false
17146	104.1359278	1	1000101011 (1) 1000101010	false
17147	77.49934109	1	1000101010 (1) 0000101010	false
17148	305.29342768	1	1000101010 (1) 1100101010	false
17149	304.78247736	1	1000101010 (1) 1010101010	false
17150	339.80041085	1	1000101010 (1) 1001101010	false
17151	47.02116907	1	1000101010 (1) 1000001010	false
17152	182.49884546	1	1000101010 (1) 1000111010	false
17153	209.12462388	1	1000101010 (1) 1000100010	false
17154	278.99688059	1	1000101010 (1) 1000101000	false
17155	485.5388283	1	1000101010 (1) 1000101011	false
17156	1780.15152463	1	0010101010 (1) 1010101010	false
17157	233.49810294	1	0010101010 (1) 0010001010	false
17158	621.72381577	1	0010101010 (1) 0010111010	false
17159	263.83636414	1	0010101010 (1) 0010100010	false
17160	455.73257931	1	0010101010 (1) 0010101000	false
17161	644.05554702	1	0010101010 (1) 0010101011	false
17162	3930.55187456	1	0001101010 (1) 1001101010	false
17163	5667.92096415	1	0001101010 (1) 0011101010	false
17164	75.38727558	1	0001101010 (1) 0001001010	false
17165	1263.29832815	1	0001101010 (1) 0001111010	false
17166	638.29249868	1	0001101010 (1) 0001100010	false
17167	1120.76840696	1	0001101010 (1) 0001101000	false
17168	1620.99785075	1	0001101010 (1) 0001101011	false
17169	236.57109649	1	0000111010 (1) 1000111010	false
17170	147.12435512	1	0000111010 (1) 0010111010	false
17171	402.49849554	1	0000111010 (1) 0001111010	false
17172	273.28591704	1	0000111010 (1) 0000011010	false
17173	167.24680944	1	0000111010 (1) 0000110010	false
17174	345.03754681	1	0000111010 (1) 0000111110	false
17175	236.26689484	1	0000111010 (1) 0000111000	false
17176	269.59270388	1	0000111010 (1) 0000111011	false
17177	1471.25162013	1	0000101011 (1) 1000101011	false
17178	243.68926667	1	0000101011 (1) 0010101011	false
17179	417.1261805	1	0000101011 (1) 0001101011	false
17180	62.81398604	1	0000101011 (1) 0000001011	false
17181	347.92548687	1	0000101011 (1) 0000111011	false
17182	258.34405327	1	0000101011 (1) 0000100011	false
17183	361.61439504	1	0000101011 (1) 0000101111	false
17184	340.96016155	1	0000101011 (1) 0000101001	false
17185	136.74363313	1	0000101011 (1) 0000101010	false
17186	1654.03353826	1	0000101010 (1) 1000101010	false
17187	274.60974692	1	0000101010 (1) 0010101010	false
17188	464.50571713	1	0000101010 (1) 0001101010	false
17189	51.19614533	1	0000101010 (1) 0000001010	false
17190	537.82206014	1	0000101010 (1) 0000111010	false
17191	264.2859245	1	0000101010 (1) 0000100010	false
17192	366.0721466	1	0000101010 (1) 0000101000	false
17193	725.75088536	1	0000101010 (1) 0000101011	false
17194	103.41852278	1	0111101101 (1) 1111101101	false
17195	1670.53349158	1	0111101101 (1) 0011101101	false
17196	347.426423	1	0111101101 (1) 0101101101	false
17197	2997.63628678	1	0111101101 (1) 0110101101	false
17198	659.86568391	1	0111101101 (1) 0111111101	false
17199	339.81811675	1	0111101101 (1) 0111100101	false
17200	1020.47281572	1	0111101101 (1) 0111101100	false
17201	3068.99828465	1	1111101101 (1) 0111101101	false
17202	330.86940343	1	1111101101 (1) 1101101101	false
17203	5254.3952845	1	1111101101 (1) 1110101101	false
17204	1819.41309593	1	1111101101 (1) 1111111101	false
17205	541.50868892	1	1111101101 (1) 1111100101	false
17206	1554.45181777	1	1111101101 (1) 1111101100	false
17207	304.94703593	1	0110011110 (1) 1110011110	false
17208	227.86585814	1	0110011110 (1) 0010011110	false
17209	1762.81846966	1	0110011110 (1) 0100011110	false
17210	885.54302825	1	0110011110 (1) 0110001110	false
17211	2463.87155453	1	0110011110 (1) 0110010110	false
17212	226.30709141	1	0110011110 (1) 0110011111	false
17213	327.48445796	1	0110011101 (1) 1110011101	false
17214	238.67712797	1	0110011101 (1) 0010011101	false
17215	2190.50019629	1	0110011101 (1) 0100011101	false
17216	1566.51920186	1	0110011101 (1) 0110001101	false
17217	1994.89833321	1	0110011101 (1) 0110011111	false
17218	780.18658857	1	0110011101 (1) 0110011100	false
17219	459.7919687	1	0101110011 (1) 1101110011	false
17220	2696.60019745	1	0101110011 (1) 0001110011	false
17221	358.10306572	1	0101110011 (1) 0101110111	false
17222	1479.16961699	1	0101110011 (1) 0101110001	false
17223	202.15052255	1	0101110011 (1) 0101110010	false
17224	659.03746988	1	1110011110 (1) 0110011110	false
17225	281.53170255	1	1110011110 (1) 1010011110	false
17226	2038.11185083	1	1110011110 (1) 1100011110	false
17227	607.73791839	1	1110011110 (1) 1110001110	false
17228	2727.56339733	1	1110011110 (1) 1110010110	false
17229	251.18783749	1	1110011110 (1) 1110011111	false
17230	817.7934814	1	1110011101 (1) 0110011101	false
17231	303.63290172	1	1110011101 (1) 1010011101	false
17232	2560.44334345	1	1110011101 (1) 1100011101	false
17233	1179.55576195	1	1110011101 (1) 1110001101	false
17234	2437.49812001	1	1110011101 (1) 1110011111	false
17235	827.59930506	1	1110011101 (1) 1110011100	false
17236	506.87699688	1	1101110011 (1) 0101110011	false
17237	4602.71049234	1	1101110011 (1) 1001110011	false
17238	444.57601362	1	1101110011 (1) 1101110111	false
17239	2452.75895951	1	1101110011 (1) 1101110001	false
17240	268.43909099	1	1101110011 (1) 1101110010	false
17241	2297.68122363	1	0011101101 (1) 1011101101	false
17242	1325.20725922	1	0011101101 (1) 0010101101	false
17243	1078.94666052	1	0011101101 (1) 0011001101	false
17244	194.2637638	1	0011101101 (1) 0011111101	false
17245	244.40835289	1	0011101101 (1) 0011100101	false
17246	1057.01784664	1	0011101101 (1) 0011101100	false
17247	71.24276877	1	1011101101 (1) 0011101101	false
17248	1558.16529823	1	1011101101 (1) 1111101101	false
17249	1166.3287432	1	1011101101 (1) 1010101101	false
17250	1320.19394438	1	1011101101 (1) 1011001101	false
17251	98.11408113	1	1011101101 (1) 1011111101	false
17252	294.3473588	1	1011101101 (1) 1011100101	false
17253	993.62475646	1	1011101101 (1) 1011101100	false
17254	2237.69508953	1	1100100110 (1) 0100100110	false
17255	855.39534371	1	1100100110 (1) 1101100110	false
17256	4275.19236219	1	1100100110 (1) 1100110110	false
17257	4423.16181264	1	1100100110 (1) 1100100010	false
17258	2541.01786635	1	1100100110 (1) 1100100100	false
17259	234.07332779	1	1100100110 (1) 1100100111	false
17260	1758.63773273	1	1100000111 (1) 0100000111	false
17261	783.0735003	1	1100000111 (1) 1101000111	false
17262	5406.83830977	1	1100000111 (1) 1100100111	false
17263	2004.62005527	1	1100000111 (1) 1100000110	false
17264	683.43515558	1	0001110011 (1) 1001110011	false
17265	2395.21514455	1	0001110011 (1) 0011110011	false
17266	848.32690015	1	0001110011 (1) 0001010011	false
17267	250.21283696	1	0001110011 (1) 0001110111	false
17268	2229.19692214	1	0001110011 (1) 0001110001	false
17269	206.61699376	1	0001110011 (1) 0001110010	false
17270	304.87541395	1	0100100110 (1) 1100100110	false
17271	2661.3704797	1	0100100110 (1) 0000100110	false
17272	935.05374483	1	0100100110 (1) 0101100110	false
17273	2067.41851244	1	0100100110 (1) 0100110110	false
17274	3479.3008117	1	0100100110 (1) 0100100010	false
17275	1845.56549098	1	0100100110 (1) 0100100100	false
17276	204.13808815	1	0100100110 (1) 0100100111	false
17277	253.65690688	1	0100000111 (1) 1100000111	false
17278	2050.55348295	1	0100000111 (1) 0000000111	false
17279	927.00921203	1	0100000111 (1) 0101000111	false
17280	4072.10489578	1	0100000111 (1) 0100100111	false
17281	1778.36808067	1	0100000111 (1) 0100000110	false
17282	374.01050751	1	1001110011 (1) 0001110011	false
17283	3480.65932652	1	1001110011 (1) 1011110011	false
17284	1072.30149294	1	1001110011 (1) 1001010011	false
17285	277.89149351	1	1001110011 (1) 1001110111	false
17286	3147.40476364	1	1001110011 (1) 1001110001	false
17287	248.88675542	1	1001110011 (1) 1001110010	false
17288	291.24478528	1	1010011110 (1) 0010011110	false
17289	4359.80435548	1	1010011110 (1) 1010001110	false
17290	3144.56115894	1	1010011110 (1) 1010010110	false
17291	243.47022233	1	1010011110 (1) 1010011111	false
17292	283.35332752	1	1010011101 (1) 0010011101	false
17293	6476.17201883	1	1010011101 (1) 1010001101	false
17294	1725.04814199	1	1010011101 (1) 1010011111	false
17295	1222.36551711	1	1010011101 (1) 1010011100	false
17296	180.30150337	1	0111101010 (1) 1111101010	false
17297	2010.01077506	1	0111101010 (1) 0011101010	false
17298	422.43181166	1	0111101010 (1) 0101101010	false
17299	4716.47197547	1	0111101010 (1) 0110101010	false
17300	2654.65759207	1	0111101010 (1) 0111111010	false
17301	530.33517765	1	0111101010 (1) 0111100010	false
17302	802.58042457	1	0111101010 (1) 0111101000	false
17303	1666.13360944	1	0111101010 (1) 0111101011	false
17304	116.68001272	1	0111001011 (1) 1111001011	false
17305	106.04862403	1	0111001011 (1) 0011001011	false
17306	245.36634287	1	0111001011 (1) 0101001011	false
17307	179.04586891	1	0111001011 (1) 0110001011	false
17308	4343.52015637	1	0111001011 (1) 0111101011	false
17309	375.05675126	1	0111001011 (1) 0111000011	false
17310	486.43212852	1	0111001011 (1) 0111001111	false
17311	200.86349467	1	0111001011 (1) 0111001010	false
17312	929.97783974	1	0010011110 (1) 1010011110	false
17313	1883.16163228	1	0010011110 (1) 0010001110	false
17314	2701.29384384	1	0010011110 (1) 0010010110	false
17315	191.70914227	1	0010011110 (1) 0010011111	false
17316	1115.01896101	1	0010011101 (1) 1010011101	false
17317	2449.88854073	1	0010011101 (1) 0010001101	false
17318	1416.0369126	1	0010011101 (1) 0010011111	false
17319	853.71486763	1	0010011101 (1) 0010011100	false
17320	4581.93012209	1	1111101010 (1) 0111101010	false
17321	474.58810608	1	1111101010 (1) 1101101010	false
17322	9525.1635937	1	1111101010 (1) 1110101010	false
17323	7365.06123163	1	1111101010 (1) 1111111010	false
17324	882.68141094	1	1111101010 (1) 1111100010	false
17325	1338.78580646	1	1111101010 (1) 1111101000	false
17326	2925.60611694	1	1111101010 (1) 1111101011	false
17327	3371.68672092	1	1111001011 (1) 0111001011	false
17328	396.40823062	1	1111001011 (1) 1101001011	false
17329	265.72658702	1	1111001011 (1) 1110001011	false
17330	12110.16690916	1	1111001011 (1) 1111101011	false
17331	749.61033238	1	1111001011 (1) 1111000011	false
17332	1024.48549731	1	1111001011 (1) 1111001111	false
17333	508.9759113	1	1111001011 (1) 1111001010	false
17334	118.15408416	1	1011001011 (1) 0011001011	false
17335	11216.99097212	1	1011001011 (1) 1111001011	false
17336	432.7647444	1	1011001011 (1) 1001001011	false
17337	517.29068641	1	1011001011 (1) 1010001011	false
17338	731.52998563	1	1011001011 (1) 1011000011	false
17339	844.42546905	1	1011001011 (1) 1011001111	false
17340	413.86839093	1	1011001011 (1) 1011001010	false
17341	2087.7382747	1	0011001011 (1) 1011001011	false
17342	273.86352281	1	0011001011 (1) 0001001011	false
17343	440.13604719	1	0011001011 (1) 0010001011	false
17344	428.75121622	1	0011001011 (1) 0011000011	false
17345	368.65161428	1	0011001011 (1) 0011001111	false
17346	130.0963474	1	0011001011 (1) 0011001010	false
17347	1919.77188973	1	0000100110 (1) 1000100110	false
17348	717.55039144	1	0000100110 (1) 0010100110	false
17349	1221.00802542	1	0000100110 (1) 0001100110	false
17350	1187.48513262	1	0000100110 (1) 0000110110	false
17351	3267.0601772	1	0000100110 (1) 0000100010	false
17352	1562.73657713	1	0000100110 (1) 0000100100	false
17353	159.46489298	1	0000100110 (1) 0000100111	false
17354	2083.46995374	1	0000000111 (1) 1000000111	false
17355	831.02423063	1	0000000111 (1) 0010000111	false
17356	1607.85259708	1	0000000111 (1) 0001000111	false
[truncated: 4,149 more rows]
