# Supplementary material
Source: publisher figshare collection journal article supplement (https://springernature.figshare.com/ndownloader/files/17562821)
Supplement: Supplementary file 1 [file 17562821 › CytoscapeSession-2018_09_25-21_15/tables/14328-STG%2C+Model+1%2C+Fluctuating+Inputs/LOCAL_ATTRS-org.cytoscape.model.CyNode-STG%2C+Model+1%2C+Fluctuating+Inputs+default++node.cytable]

CyCSV-Version	1
SUID	AverageShortestPathLength	BetweennessCentrality	ClosenessCentrality	ClusteringCoefficient	Eccentricity	EdgeCount	Indegree	IsSingleNode	name	NeighborhoodConnectivity	Outdegree	PartnerOfMultiEdgedNodePairs	selected	SelfLoops	Stress
java.lang.Long	java.lang.Double	java.lang.Double	java.lang.Double	java.lang.Double	java.lang.Integer	java.lang.Integer	java.lang.Integer	java.lang.Boolean	java.lang.String	java.lang.Double	java.lang.Integer	java.lang.Integer	java.lang.Boolean	java.lang.Integer	java.lang.Long
	mutable	mutable	mutable	mutable	mutable	mutable	mutable	mutable		mutable	mutable	mutable		mutable	mutable
STG, Model 1, Fluctuating Inputs default node
14338	7.34611504	0.00237329	0.13612637	0.0	15	12	5	false	0111111111	10.0	7	2	false	0	212412673
14339	7.19273461	0.00528875	0.13902918	0.0	14	12	5	false	1111111111	10.0	7	2	false	0	286057055
14340	8.17759839	0.00290505	0.12228529	0.0	17	12	6	false	1011111111	10.0	6	2	false	0	124873980
14341	8.83551968	0.0020794	0.11317953	0.0	18	12	6	false	0011111111	10.0	6	2	false	0	164398692
14342	9.24722503	0.00450707	0.10814055	0.0	19	12	7	false	1101111111	10.0	5	2	false	0	85916006
14343	9.83047427	0.00285294	0.10172449	0.0	20	12	7	false	0101111111	10.0	5	2	false	0	27620873
14344	8.40766902	0.00438616	0.11893903	0.0	18	12	6	false	1001111111	10.0	6	2	false	0	233844638
14345	9.01917255	0.00326223	0.11087492	0.0	19	12	6	false	0001111111	10.0	6	2	false	0	363851778
14346	7.88294652	0.00304738	0.12685612	0.0	18	12	5	false	0110111111	10.0	7	2	false	0	372717972
14347	7.77396569	0.00567755	0.12863448	0.0	17	12	5	false	1110111111	10.0	7	2	false	0	348879241
14348	10.25227043	9.8166E-4	0.09753937	0.0	20	12	7	false	1010111111	10.0	5	2	false	0	55106461
14349	10.9667003	6.9265E-4	0.09118513	0.0	21	12	7	false	0010111111	10.0	5	2	false	0	37636303
14350	7.70131181	0.00365959	0.12984801	0.0	16	12	5	false	1100111111	10.0	7	2	false	0	261428690
14351	7.91927346	0.00225847	0.12627421	0.0	17	12	5	false	0100111111	10.0	7	2	false	0	367561480
14352	8.44399596	9.3408E-4	0.11842734	0.0	16	12	5	false	0000111111	10.0	7	2	false	0	49968796
14353	7.87891019	0.00137382	0.12692111	0.0	15	12	5	false	1000111111	10.0	7	2	false	0	76652383
14354	6.6001994	7.3201E-4	0.15151057	0.0	13	12	4	false	1111011111	10.0	8	2	false	0	1446140
14355	6.55234297	7.8699E-4	0.15261716	0.0	13	12	4	false	0111011111	10.0	8	2	false	0	1546202
14356	7.87891019	0.01096615	0.12692111	0.0	16	12	7	false	1011011111	10.0	5	2	false	0	1104771633
14357	8.55297679	0.00441044	0.11691836	0.0	17	12	7	false	0011011111	10.0	5	2	false	0	503627415
14358	8.92028254	0.00392728	0.11210407	0.0	19	12	6	false	0101011111	10.0	6	2	false	0	112446150
14359	8.50857719	0.00418712	0.11752846	0.0	18	12	6	false	1101011111	10.0	6	2	false	0	140773168
14360	8.21796165	0.01081415	0.12168468	0.0	17	12	7	false	1001011111	10.0	5	2	false	0	1117853594
14361	8.84561049	0.00562126	0.11305042	0.0	18	12	7	false	0001011111	10.0	5	2	false	0	891913267
14362	5.86074672	0.00993485	0.17062672	0.0	13	12	4	false	0111101111	10.0	8	2	false	0	807530799
14363	6.15136226	0.02227726	0.16256562	0.0	13	12	5	false	1111101111	10.0	7	2	false	0	1706912592
14364	8.12108981	0.00330598	0.12313618	0.0	17	12	6	false	0110011111	10.0	6	2	false	0	68114964
14365	8.0	0.00399088	0.125	0.0	16	12	6	false	1110011111	10.0	6	2	false	0	43934173
14366	6.13521695	0.00383627	0.16299342	0.0	14	12	4	false	1011101111	10.0	8	2	false	0	109443616
14367	6.79313824	0.00511421	0.14720737	0.0	15	12	5	false	0011101111	10.0	7	2	false	0	152745580
14368	9.88294652	0.00416784	0.1011844	0.0	19	12	8	false	1010011111	10.0	4	2	false	0	203429301
14369	10.6074672	0.00263018	0.09427321	0.0	20	12	8	false	0010011111	10.0	4	2	false	0	170585652
14370	7.8284561	0.01097002	0.12773911	0.0	17	12	6	false	0101101111	10.0	6	2	false	0	388097338
14371	8.53683148	0.00597966	0.11713948	0.0	18	12	7	false	1101101111	10.0	5	2	false	0	121536196
14372	7.77396569	0.00645847	0.12863448	0.0	15	12	6	false	1100011111	10.0	6	2	false	0	140202174
14373	8.0	0.00570121	0.125	0.0	16	12	6	false	0100011111	10.0	6	2	false	0	189018262
14374	6.21997982	0.00598301	0.16077223	0.0	14	12	4	false	0011101110	10.0	8	2	false	0	244958265
14375	7.02119072	0.0084691	0.14242598	0.0	16	12	5	false	0001101111	10.0	7	2	false	0	288642023
14376	5.59031282	0.00435206	0.17888087	0.0	13	12	3	false	1011101110	10.0	9	2	false	0	189481336
14377	6.45005045	0.00258608	0.15503755	0.0	15	12	4	false	1001101111	10.0	8	2	false	0	80042342
14378	8.45206862	0.00387231	0.11831423	0.0	15	12	6	false	0000011111	10.0	6	2	false	0	159374855
14379	7.87083754	0.00587089	0.12705128	0.0	14	12	6	false	1000011111	10.0	6	2	false	0	256776752
14380	6.34510595	0.00650616	0.15760178	0.0	14	12	4	false	0110101111	10.0	8	2	false	0	680834266
14381	5.81634712	0.00775591	0.17192922	0.0	13	12	3	false	0110101110	10.0	9	2	false	0	1339445964
14382	6.70030272	0.01095748	0.14924699	0.0	14	12	5	false	1110101111	10.0	7	2	false	0	789306456
14383	6.1715439	0.01284773	0.16203401	0.0	13	12	4	false	1110101110	10.0	8	2	false	0	1608467495
14384	7.19273461	0.00236804	0.13902918	0.0	15	12	5	false	1010101111	10.0	7	2	false	0	44918505
14385	7.96569122	0.00180916	0.12553838	0.0	16	12	6	false	0010101111	10.0	6	2	false	0	47315525
14386	8.41170535	0.00199497	0.11888196	0.0	17	12	6	false	0111110111	10.0	6	2	false	0	57601122
14387	8.23410696	0.00339878	0.12144608	0.0	16	12	6	false	1111110111	10.0	6	2	false	0	119420653
14388	9.10595358	0.00513604	0.10981826	0.0	16	12	8	false	1011110111	10.0	4	2	false	0	148518818
14389	9.71947528	0.0040673	0.10288621	0.0	17	12	8	false	0011110111	10.0	4	2	false	0	184186727
14390	6.24823411	0.00485954	0.16004522	0.0	14	12	4	false	0100101111	10.0	8	2	false	0	467435803
14391	5.71947528	0.0056626	0.17484121	0.0	13	12	3	false	0100101110	10.0	9	2	false	0	862983004
14392	6.73259334	0.00365388	0.14853118	0.0	15	12	5	false	1100101111	10.0	7	2	false	0	257025292
14393	6.20383451	0.00427201	0.16119063	0.0	14	12	4	false	1100101110	10.0	8	2	false	0	484163249
14394	6.62361251	0.002745	0.15097502	0.0	14	12	4	false	1010101110	10.0	8	2	false	0	78336505
14395	5.91321897	0.00296245	0.16911263	0.0	14	12	3	false	1001101110	10.0	9	2	false	0	125919408
14396	5.53784057	8.6546E-4	0.1805758	0.0	12	12	3	false	1000101111	10.0	9	2	false	0	9046081
14397	5.00908174	0.00108514	0.19963739	0.0	11	12	2	false	1000101110	10.0	10	2	false	0	35713195
14398	7.35418769	0.0022251	0.13597695	0.0	15	12	5	false	0010101110	10.0	7	2	false	0	82746750
14399	6.47023209	0.00971074	0.15455396	0.0	15	12	4	false	0001101110	10.0	8	2	false	0	400204257
14400	6.0221998	0.00262721	0.16605228	0.0	13	12	4	false	0000101111	10.0	8	2	false	0	187274003
14401	5.49344097	0.00306112	0.18203527	0.0	12	12	3	false	0000101110	10.0	9	2	false	0	333770642
14402	10.85771948	0.00227601	0.09210037	0.0	19	12	8	false	0101110111	10.0	4	2	false	0	414550878
14403	10.2764884	0.00355344	0.09730951	0.0	18	12	8	false	1101110111	10.0	4	2	false	0	274076758
14404	5.33198789	0.01221516	0.18754731	0.0	12	12	3	false	0111101110	10.0	9	2	false	0	1675291703
14405	6.52270434	0.00686621	0.15331064	0.0	14	12	5	false	0111001111	10.0	7	2	false	0	540848094
14406	5.62260343	0.02734381	0.17785355	0.0	12	12	4	false	1111101110	10.0	8	2	false	0	3666884707
14407	6.79717457	0.02977308	0.14711995	0.0	14	12	6	false	1111001111	10.0	6	2	false	0	2628215722
14408	9.44500505	0.00706176	0.10587607	0.0	17	12	8	false	1001110111	10.0	4	2	false	0	433776249
14409	10.05045409	0.00572191	0.09949799	0.0	18	12	8	false	0001110111	10.0	4	2	false	0	656894334
14410	7.32189707	0.02930683	0.13657663	0.0	15	12	7	false	1011001111	10.0	5	2	false	0	2839471233
14411	8.1049445	0.00570556	0.12338147	0.0	16	12	8	false	0011001111	10.0	4	2	false	0	577158962
14412	8.8234107	0.006027	0.11333486	0.0	19	12	7	false	1110110111	10.0	5	2	false	0	508742559
14413	8.9283552	0.00399392	0.11200271	0.0	20	12	7	false	0110110111	10.0	5	2	false	0	742948491
14414	7.97981837	0.00673492	0.12531614	0.0	17	12	6	false	1101101110	10.0	6	2	false	0	133598257
14415	9.21897074	0.0088653	0.10847198	0.0	19	12	8	false	1101001111	10.0	4	2	false	0	119063737
14416	7.27749748	0.0129114	0.13740987	0.0	16	12	5	false	0101101110	10.0	7	2	false	0	475436835
14417	8.52270434	0.00966396	0.11733365	0.0	18	12	7	false	0101001111	10.0	5	2	false	0	473262282
14418	7.790111	0.01719052	0.12836788	0.0	16	12	7	false	1001001111	10.0	5	2	false	0	1376010392
14419	8.52068618	0.00745115	0.11736144	0.0	17	12	8	false	0001001111	10.0	4	2	false	0	792235471
14420	10.95459132	0.002699	0.09128592	0.0	20	12	9	false	1010110111	10.0	3	2	false	0	31756054
14421	11.56407669	0.00252245	0.08647469	0.0	21	12	9	false	0010110111	10.0	3	2	false	0	73648145
14422	8.78708375	0.00663599	0.1138034	0.0	18	12	7	false	1100110111	10.0	5	2	false	0	634676199
14423	6.66397578	0.00537616	0.15006057	0.0	13	12	5	false	1111111110	10.0	7	2	false	0	289880011
14424	6.26437941	0.0045783	0.15963273	0.0	13	12	4	false	1111111011	10.0	8	2	false	0	737305649
14425	8.99293643	0.00478333	0.11119838	0.0	19	12	7	false	0100110111	10.0	5	2	false	0	1051821957
14426	6.81735621	0.00260676	0.14668443	0.0	14	12	5	false	0111111110	10.0	7	2	false	0	221245712
14427	6.40968718	0.00224586	0.15601385	0.0	14	12	4	false	0111111011	10.0	8	2	false	0	706884979
14428	7.59233098	0.00367505	0.13171186	0.0	16	12	6	false	1011111110	10.0	6	2	false	0	87005384
14429	7.0716448	0.00444164	0.14140982	0.0	14	12	5	false	1011111011	10.0	7	2	false	0	51676007
14430	8.32694248	0.00315022	0.1200921	0.0	16	12	7	false	0110001111	10.0	5	2	false	0	91364843
14431	8.72653885	0.00651039	0.11459297	0.0	17	12	8	false	1110001111	10.0	4	2	false	0	265855022
14432	8.21796165	0.00256904	0.12168468	0.0	17	12	6	false	0011111110	10.0	6	2	false	0	99967076
14433	7.65691221	0.00314798	0.13060095	0.0	15	12	5	false	0011111011	10.0	7	2	false	0	112202368
14434	9.7679112	0.00487962	0.10237603	0.0	18	12	7	false	0000110111	10.0	5	2	false	0	644482517
14435	9.17860747	0.00537408	0.10894899	0.0	17	12	7	false	1000110111	10.0	5	2	false	0	353417749
14436	9.31180626	0.00671826	0.10739055	0.0	18	12	8	false	1010001111	10.0	4	2	false	0	353636877
14437	10.12512614	0.00250188	0.0987642	0.0	19	12	9	false	0010001111	10.0	3	2	false	0	154586362
14438	8.16016016	6.9006E-4	0.12254661	0.0	18	12	5	false	0111010111	10.0	7	2	false	0	2164553
14439	8.02402402	6.9585E-4	0.12462575	0.0	17	12	5	false	1111010111	10.0	7	2	false	0	2676424
14440	8.69021191	0.00476629	0.11507199	0.0	18	12	7	false	1101111110	10.0	5	2	false	0	50262360
14441	8.28254289	0.00575396	0.12073587	0.0	16	12	6	false	1101111011	10.0	6	2	false	0	65265959
14442	9.25731584	0.00312351	0.10802267	0.0	19	12	7	false	0101111110	10.0	5	2	false	0	75766834
14443	8.82542886	0.00341227	0.11330894	0.0	17	12	6	false	0101111011	10.0	6	2	false	0	102998265
14444	8.7346115	0.00620152	0.11448706	0.0	16	12	7	false	1011010111	10.0	5	2	false	0	352915583
14445	9.36427851	0.00434117	0.10678879	0.0	17	12	7	false	0011010111	10.0	5	2	false	0	289737245
14446	7.8506559	0.00520326	0.12737789	0.0	17	12	6	false	1001111110	10.0	6	2	false	0	127279855
14447	7.4752775	0.0051278	0.1337743	0.0	15	12	5	false	1001111011	10.0	7	2	false	0	51614161
14448	8.44601413	0.00378482	0.11839904	0.0	18	12	6	false	0001111110	10.0	6	2	false	0	186375455
14449	8.05045409	0.00372895	0.1242166	0.0	16	12	5	false	0001111011	10.0	7	2	false	0	103547521
14450	7.96367306	0.00617211	0.1255702	0.0	15	12	7	false	0100001111	10.0	5	2	false	0	182974155
14451	8.48032291	0.00571835	0.11792004	0.0	16	12	8	false	1100001111	10.0	4	2	false	0	144088617
14452	7.64480323	0.00662825	0.13080781	0.0	14	12	6	false	1000001111	10.0	6	2	false	0	250274001
14453	8.27447023	0.00474595	0.12085366	0.0	15	12	7	false	0000001111	10.0	5	2	false	0	166085473
14454	10.36528759	0.00160178	0.09647586	0.0	19	12	7	false	0101010111	10.0	5	2	false	0	147133218
14455	9.81634712	0.00196084	0.10187089	0.0	18	12	7	false	1101010111	10.0	5	2	false	0	89216010
14456	9.05751766	0.00966804	0.11040553	0.0	17	12	7	false	1001010111	10.0	5	2	false	0	570800582
14457	9.6629667	0.00735985	0.10348789	0.0	18	12	7	false	0001010111	10.0	5	2	false	0	766273498
14458	7.35418769	0.00334431	0.13597695	0.0	17	12	5	false	0110111110	10.0	7	2	false	0	400283175
14459	6.92633703	0.00270839	0.14437646	0.0	17	12	4	false	0110111011	10.0	8	2	false	0	1467202825
14460	7.24520686	0.00582642	0.13802228	0.0	16	12	5	false	1110111110	10.0	7	2	false	0	361728917
14461	6.84561049	0.00480602	0.14607901	0.0	16	12	4	false	1110111011	10.0	8	2	false	0	1112274243
14462	10.20383451	0.0010566	0.09800237	0.0	20	12	7	false	0010111110	10.0	5	2	false	0	43017634
14463	9.43895055	0.00113324	0.10594398	0.0	18	12	6	false	0010111011	10.0	6	2	false	0	7860608
14464	9.53380424	0.00141499	0.10488992	0.0	19	12	7	false	1010111110	10.0	5	2	false	0	37162478
14465	8.85166498	0.0013336	0.1129731	0.0	17	12	6	false	1010111011	10.0	6	2	false	0	44622071
14466	7.790111	0.00299511	0.12836788	0.0	16	12	5	false	0111110110	10.0	7	2	false	0	143392615
14467	8.29868819	0.00322931	0.12050097	0.0	18	12	5	false	0111100111	10.0	7	2	false	0	139896262
14468	8.8234107	0.00338643	0.11333486	0.0	21	12	6	false	0110010111	10.0	6	2	false	0	41839480
14469	7.61251261	0.00480517	0.13136267	0.0	15	12	5	false	1111110110	10.0	7	2	false	0	322346400
14470	8.29061554	0.00878873	0.12061831	0.0	17	12	6	false	1111100111	10.0	6	2	false	0	566420013
14471	8.70232089	0.00366467	0.11491187	0.0	20	12	6	false	1110010111	10.0	6	2	false	0	60171342
14472	8.40363269	0.00845908	0.11899616	0.0	15	12	7	false	1011110110	10.0	5	2	false	0	232718016
14473	8.08879919	0.01060165	0.12362774	0.0	16	12	6	false	1011100111	10.0	6	2	false	0	851291203
14474	7.39051463	0.00256919	0.13530857	0.0	16	12	5	false	0100111110	10.0	7	2	false	0	385548230
14475	7.0716448	0.00208081	0.14140982	0.0	16	12	4	false	0100111011	10.0	8	2	false	0	1574964881
14476	7.17255298	0.00392532	0.13942037	0.0	15	12	5	false	1100111110	10.0	7	2	false	0	273627812
14477	6.88193744	0.00332184	0.14530792	0.0	15	12	4	false	1100111011	10.0	8	2	false	0	983347980
14478	10.30877901	0.00468749	0.0970047	0.0	21	12	8	false	1010010111	10.0	4	2	false	0	181439527
14479	10.97073663	0.00317114	0.09115158	0.0	22	12	8	false	0010010111	10.0	4	2	false	0	133662518
14480	9.00908174	0.00736817	0.1109991	0.0	16	12	7	false	0011110110	10.0	5	2	false	0	250347012
14481	8.76690212	0.00541864	0.11406538	0.0	17	12	7	false	0011100111	10.0	5	2	false	0	456092764
14482	7.90716448	0.00122145	0.12646759	0.0	15	12	5	false	0000111110	10.0	7	2	false	0	27371147
14483	7.87083754	8.2466E-4	0.12705128	0.0	17	12	4	false	0000111011	10.0	8	2	false	0	21537918
14484	7.34207871	0.00176903	0.13620121	0.0	14	12	5	false	1000111110	10.0	7	2	false	0	78344605
14485	7.31382442	0.00118229	0.13672737	0.0	16	12	4	false	1000111011	10.0	8	2	false	0	284898262
14486	8.55297679	0.00206624	0.11691836	0.0	15	12	7	false	0111111101	10.0	5	2	false	0	17756233
14487	8.36326942	0.00382289	0.11957046	0.0	15	12	7	false	1111111101	10.0	5	2	false	0	25725351
14488	5.7040715	6.625E-4	0.17531337	0.0	11	12	3	false	1111011011	10.0	9	2	false	0	397316
14489	5.62462761	7.1422E-4	0.17778955	0.0	11	12	3	false	0111011011	10.0	9	2	false	0	419203
14490	10.1876892	0.00326344	0.09815769	0.0	18	12	7	false	0101110110	10.0	5	2	false	0	325899572
14491	10.01816347	0.00400377	0.09981869	0.0	19	12	7	false	0101100111	10.0	5	2	false	0	694896846
14492	8.47628658	0.00488916	0.11797619	0.0	19	12	6	false	1100010111	10.0	6	2	false	0	102865913
14493	8.70232089	0.00444065	0.11491187	0.0	20	12	6	false	0100010111	10.0	6	2	false	0	249804660
14494	8.58930373	0.0155192	0.11642387	0.0	16	12	8	false	1011111101	10.0	4	2	false	0	955698861
14495	9.61049445	0.00489253	0.10405292	0.0	17	12	7	false	1101110110	10.0	5	2	false	0	270143371
14496	10.15539859	0.00381996	0.09846979	0.0	18	12	8	false	1101100111	10.0	4	2	false	0	209514682
14497	9.28355197	0.00743297	0.10771739	0.0	17	12	8	false	0011111101	10.0	4	2	false	0	570193054
14498	7.18869828	0.00680808	0.13910724	0.0	13	12	5	false	1011011011	10.0	7	2	false	0	450929008
14499	7.82643794	0.00277806	0.12777205	0.0	14	12	5	false	0011011011	10.0	7	2	false	0	96498186
14500	8.77497477	0.00927144	0.11396044	0.0	16	12	7	false	1001110110	10.0	5	2	false	0	450537239
14501	8.50857719	0.00777877	0.11752846	0.0	17	12	6	false	1001100111	10.0	6	2	false	0	558415385
14502	9.02522704	0.0076086	0.11080054	0.0	19	12	6	false	0000010111	10.0	6	2	false	0	404711916
14503	8.44399596	0.00915335	0.11842734	0.0	18	12	6	false	1000010111	10.0	6	2	false	0	217052392
14504	9.37638749	0.00809223	0.10665088	0.0	17	12	7	false	0001110110	10.0	5	2	false	0	571316612
14505	9.1382442	0.00760857	0.10943021	0.0	18	12	7	false	0001100111	10.0	5	2	false	0	960684740
14506	10.51463169	0.00236222	0.09510557	0.0	19	12	9	false	0101111101	10.0	3	2	false	0	331610743
14507	9.88092836	0.00447649	0.10120507	0.0	18	12	9	false	1101111101	10.0	3	2	false	0	402781261
14508	8.12108981	0.00363505	0.12313618	0.0	16	12	5	false	0101011011	10.0	7	2	false	0	144771196
14509	8.11705348	0.00336177	0.12319741	0.0	17	12	5	false	1101011011	10.0	7	2	false	0	120966125
14510	8.90413724	0.01717455	0.11230734	0.0	17	12	8	false	1001111101	10.0	4	2	false	0	1675900506
14511	9.54187689	0.00953368	0.10480118	0.0	18	12	8	false	0001111101	10.0	4	2	false	0	1307157622
14512	8.19778002	0.009909	0.12198424	0.0	18	12	6	false	1110110110	10.0	6	2	false	0	731223778
14513	8.90413724	0.01326615	0.11230734	0.0	20	12	7	false	1110100111	10.0	5	2	false	0	1317822886
14514	8.79112008	0.00413771	0.11375115	0.0	18	12	7	false	1001011011	10.0	5	2	false	0	174510806
14515	9.48133199	0.00225533	0.10547041	0.0	19	12	7	false	0001011011	10.0	5	2	false	0	80393063
14516	8.30272452	0.00658808	0.12044239	0.0	19	12	6	false	0110110110	10.0	6	2	false	0	552369439
14517	8.80726539	0.00580559	0.11354262	0.0	21	12	6	false	0110100111	10.0	6	2	false	0	1164301835
14518	10.15943491	0.00618156	0.09843067	0.0	19	12	8	false	1010110110	10.0	4	2	false	0	73924787
14519	9.38849647	0.00903012	0.10651333	0.0	21	12	7	false	1010100111	10.0	5	2	false	0	848926718
14520	10.7568113	0.00606098	0.09296435	0.0	20	12	8	false	0010110110	10.0	4	2	false	0	164536220
14521	10.13925328	0.00402026	0.09862659	0.0	22	12	8	false	0010100111	10.0	4	2	false	0	321641631
14522	8.85570131	0.00723743	0.1129216	0.0	18	12	7	false	0110111101	10.0	5	2	false	0	388086391
14523	8.7346115	0.01059601	0.11448706	0.0	17	12	7	false	1110111101	10.0	5	2	false	0	321347476
14524	6.40565086	0.00319517	0.15611216	0.0	14	12	4	false	0111111010	10.0	8	2	false	0	618071182
14525	5.24722503	0.00800038	0.19057692	0.0	10	12	3	false	0111101011	10.0	9	2	false	0	1907355881
14526	6.2764884	0.00698665	0.15932476	0.0	13	12	4	false	1111111010	10.0	8	2	false	0	797867972
14527	5.53784057	0.01601603	0.1805758	0.0	10	12	4	false	1111101011	10.0	8	2	false	0	2705683112
14528	7.86478305	0.00187471	0.12714909	0.0	16	12	5	false	0110011011	10.0	7	2	false	0	105644538
14529	8.15741675	0.01043499	0.12258783	0.0	17	12	6	false	1100110110	10.0	6	2	false	0	675586342
14530	8.70232089	0.00900268	0.11491187	0.0	19	12	7	false	1100100111	10.0	5	2	false	0	701728654
14531	7.89101917	0.00212223	0.12672634	0.0	16	12	5	false	1110011011	10.0	7	2	false	0	64370620
14532	8.36326942	0.00753233	0.11957046	0.0	18	12	6	false	0100110110	10.0	6	2	false	0	734385964
14533	8.54086781	0.00683544	0.11708412	0.0	20	12	6	false	0100100111	10.0	6	2	false	0	1594570957
14534	10.5025227	0.00506815	0.09521522	0.0	20	12	9	false	1010111101	10.0	3	2	false	0	82173810
14535	11.27749748	0.00350877	0.08867215	0.0	21	12	9	false	0010111101	10.0	3	2	false	0	53405240
14536	7.06760848	0.00479342	0.14149058	0.0	15	12	5	false	1011111010	10.0	7	2	false	0	34191025
14537	5.36024218	0.00548696	0.18655873	0.0	11	12	3	false	1011101011	10.0	9	2	false	0	218956303
14538	7.63269425	0.00365112	0.13101534	0.0	16	12	5	false	0011111010	10.0	7	2	false	0	69821427
14539	5.94147326	0.0066948	0.16830842	0.0	12	12	4	false	0011101011	10.0	8	2	false	0	310767780
14540	8.91624622	0.00368672	0.11215482	0.0	16	12	6	false	1010011011	10.0	6	2	false	0	102496311
14541	9.52976791	0.00285691	0.10493435	0.0	17	12	6	false	0010011011	10.0	6	2	false	0	101974084
14542	9.1382442	0.00664754	0.10943021	0.0	17	12	6	false	0000110110	10.0	6	2	false	0	400603887
14543	8.50857719	0.00659716	0.11752846	0.0	19	12	6	false	0000100111	10.0	6	2	false	0	681002309
14544	8.54894046	0.00698002	0.11697356	0.0	16	12	6	false	1000110110	10.0	6	2	false	0	273612523
14545	7.92734612	0.00697263	0.12614562	0.0	18	12	5	false	1000100111	10.0	7	2	false	0	215381795
14546	7.67709384	0.00413879	0.13025762	0.0	17	12	4	false	0111100110	10.0	8	2	false	0	332648390
14547	9.00100908	0.0023455	0.11109865	0.0	19	12	6	false	0111000111	10.0	6	2	false	0	70352265
14548	7.68113017	0.01099395	0.13018917	0.0	16	12	5	false	1111100110	10.0	7	2	false	0	1332485389
14549	8.98486377	0.00729468	0.11129829	0.0	18	12	7	false	1111000111	10.0	5	2	false	0	450813787
14550	8.49243189	0.0121518	0.1177519	0.0	16	12	7	false	1100111101	10.0	5	2	false	0	767636365
14551	8.7184662	0.0090452	0.11469907	0.0	17	12	7	false	0100111101	10.0	5	2	false	0	850139982
14552	8.81130172	0.0043434	0.11349061	0.0	18	12	6	false	0101111010	10.0	6	2	false	0	64296489
14553	7.09586276	0.01388902	0.14092719	0.0	14	12	5	false	0101101011	10.0	7	2	false	0	360533470
14554	7.70938446	0.00370905	0.12971204	0.0	16	12	5	false	1100011011	10.0	7	2	false	0	162331902
14555	8.28657921	0.00762313	0.12067706	0.0	17	12	6	false	1101111010	10.0	6	2	false	0	51205571
14556	7.79818365	0.00778402	0.12823499	0.0	15	12	6	false	1101101011	10.0	6	2	false	0	107703601
14557	7.72754793	0.00368909	0.12940716	0.0	15	12	5	false	0100011011	10.0	7	2	false	0	331191776
14558	8.12916246	0.00803321	0.1230139	0.0	16	12	6	false	0011100110	10.0	6	2	false	0	668672573
14559	9.54187689	0.00668691	0.10480118	0.0	18	12	8	false	0011000111	10.0	4	2	false	0	612281721
14560	9.01715439	0.00531627	0.11089973	0.0	16	12	7	false	0000111101	10.0	5	2	false	0	679113258
14561	8.43592331	0.00787916	0.11854067	0.0	15	12	7	false	1000111101	10.0	5	2	false	0	748480377
14562	7.46720484	0.01418952	0.13391892	0.0	15	12	5	false	1011100110	10.0	7	2	false	0	1573196384
14563	8.85570131	0.0146551	0.1129216	0.0	17	12	7	false	1011000111	10.0	5	2	false	0	1197945733
14564	5.64682139	0.00641088	0.17709078	0.0	12	12	4	false	1011101010	10.0	8	2	false	0	264524654
14565	7.47931382	0.00588732	0.1337021	0.0	16	12	5	false	1001111010	10.0	7	2	false	0	35881639
14566	5.75580222	0.0034529	0.17373773	0.0	12	12	3	false	1001101011	10.0	9	2	false	0	114209165
14567	6.22805247	0.00792351	0.16056384	0.0	13	12	5	false	0011101010	10.0	7	2	false	0	325256907
14568	8.03632694	0.00442054	0.12443496	0.0	17	12	5	false	0001111010	10.0	7	2	false	0	65166046
14569	6.28859738	0.01110969	0.15901797	0.0	13	12	4	false	0001101011	10.0	8	2	false	0	349976842
14570	8.40161453	0.00426621	0.11902474	0.0	15	12	6	false	1000011011	10.0	6	2	false	0	123390524
14571	9.01917255	0.00310242	0.11087492	0.0	16	12	6	false	0000011011	10.0	6	2	false	0	103433624
14572	6.07377866	0.00108882	0.16464215	0.0	12	12	4	false	1111011110	10.0	8	2	false	0	1842989
14573	6.4468719	5.9372E-4	0.15511399	0.0	14	12	4	false	1111011101	10.0	8	2	false	0	441755
14574	6.02592223	0.00118179	0.1659497	0.0	12	12	4	false	0111011110	10.0	8	2	false	0	1905294
14575	6.38331678	6.7589E-4	0.15665837	0.0	14	12	4	false	0111011101	10.0	8	2	false	0	514630
14576	9.38849647	0.00497714	0.10651333	0.0	18	12	6	false	0101100110	10.0	6	2	false	0	580395291
14577	10.75277497	0.00367369	0.09299925	0.0	20	12	8	false	0101000111	10.0	4	2	false	0	476147424
14578	7.30575177	0.01695636	0.13687845	0.0	15	12	7	false	1011011110	10.0	5	2	false	0	1826576233
14579	7.63673058	0.02431606	0.13094609	0.0	15	12	7	false	1011011101	10.0	5	2	false	0	1800726112
14580	9.54389506	0.00426181	0.10477902	0.0	17	12	7	false	1101100110	10.0	5	2	false	0	188667403
14581	10.88193744	0.00308083	0.0918954	0.0	19	12	9	false	1101000111	10.0	3	2	false	0	94966930
14582	7.95156408	0.00701255	0.12576142	0.0	16	12	7	false	0011011110	10.0	5	2	false	0	520879050
14583	8.33097881	0.00855737	0.12003391	0.0	16	12	7	false	0011011101	10.0	5	2	false	0	708637806
14584	7.88698285	0.00908264	0.1267912	0.0	16	12	5	false	1001100110	10.0	7	2	false	0	706036366
14585	9.26337033	0.0144074	0.10795207	0.0	18	12	7	false	1001000111	10.0	5	2	false	0	1021597812
14586	8.50857719	0.0096011	0.11752846	0.0	17	12	6	false	0001100110	10.0	6	2	false	0	989416022
14587	9.89707366	0.0109773	0.10103997	0.0	19	12	8	false	0001000111	10.0	4	2	false	0	1211815813
14588	6.92230071	0.00365629	0.14446064	0.0	17	12	4	false	0110111010	10.0	8	2	false	0	1061424833
14589	5.73158426	0.00550795	0.17447183	0.0	12	12	3	false	0110101011	10.0	9	2	false	0	2163919006
14590	6.01816347	0.00777574	0.16616365	0.0	13	12	4	false	0110101010	10.0	8	2	false	0	2270316519
14591	6.84157417	0.00690737	0.14616519	0.0	16	12	4	false	1110111010	10.0	8	2	false	0	947757872
14592	6.08678103	0.00914976	0.16429045	0.0	13	12	4	false	1110101011	10.0	8	2	false	0	1812493242
14593	7.9556004	0.00507116	0.12569762	0.0	17	12	6	false	1101011110	10.0	6	2	false	0	152976333
14594	8.28254289	0.00406514	0.12073587	0.0	17	12	6	false	1101011101	10.0	6	2	false	0	201912526
14595	8.34914228	0.00489185	0.11977278	0.0	18	12	6	false	0101011110	10.0	6	2	false	0	179510293
14596	8.68213925	0.00401088	0.11517899	0.0	18	12	6	false	0101011101	10.0	6	2	false	0	186274668
14597	9.18264379	0.00145706	0.1089011	0.0	17	12	6	false	0010111010	10.0	6	2	false	0	46071330
14598	6.83350151	0.00229707	0.14633786	0.0	14	12	5	false	0010101011	10.0	7	2	false	0	152010916
14599	6.32492432	0.01352635	0.15810466	0.0	13	12	5	false	1110101010	10.0	7	2	false	0	2372950191
14600	8.60544904	0.00158548	0.11620544	0.0	16	12	6	false	1010111010	10.0	6	2	false	0	21028264
14601	6.18365288	0.00302025	0.16171671	0.0	13	12	4	false	1010101011	10.0	8	2	false	0	77040147
14602	7.29767911	0.00300689	0.13702987	0.0	16	12	5	false	0111110011	10.0	7	2	false	0	111443115
14603	7.12008073	0.00521854	0.14044785	0.0	15	12	5	false	1111110011	10.0	7	2	false	0	214142356
14604	7.66700303	0.01682288	0.13042906	0.0	16	12	7	false	1001011110	10.0	5	2	false	0	1420556334
14605	7.97578204	0.02196611	0.12537955	0.0	16	12	7	false	1001011101	10.0	5	2	false	0	2058896887
14606	8.28052472	0.00875198	0.12076529	0.0	17	12	7	false	0001011110	10.0	5	2	false	0	666066177
14607	8.6135217	0.01006606	0.11609653	0.0	17	12	7	false	0001011101	10.0	5	2	false	0	1190338530
14608	8.18567104	0.00863108	0.12216469	0.0	20	12	5	false	0110100110	10.0	7	2	false	0	972902185
14609	9.54994955	0.0062495	0.1047126	0.0	22	12	7	false	0110000111	10.0	5	2	false	0	199492762
14610	8.24217962	0.00496296	0.12132713	0.0	16	12	6	false	0011110011	10.0	6	2	false	0	104121128
14611	8.29465187	0.02007322	0.12055961	0.0	19	12	6	false	1110100110	10.0	6	2	false	0	1988903956
14612	9.64682139	0.01226884	0.10366109	0.0	21	12	8	false	1110000111	10.0	4	2	false	0	830848892
14613	7.64480323	0.00665577	0.13080781	0.0	15	12	6	false	1011110011	10.0	6	2	false	0	102487126
14614	7.08375378	0.00267082	0.14116809	0.0	17	12	4	false	0100111010	10.0	8	2	false	0	1036593528
14615	5.63471241	0.00441771	0.17747135	0.0	11	12	3	false	0100101011	10.0	9	2	false	0	1913496354
14616	5.92129162	0.00582401	0.16888207	0.0	12	12	4	false	0100101010	10.0	8	2	false	0	1650551724
14617	6.89001009	0.00447992	0.14513767	0.0	16	12	4	false	1100111010	10.0	8	2	false	0	667576118
14618	6.11907164	0.00335085	0.16342348	0.0	12	12	4	false	1100101011	10.0	8	2	false	0	803085171
14619	8.76690212	0.01457902	0.11406538	0.0	20	12	6	false	1010100110	10.0	6	2	false	0	1187142648
14620	10.18365288	0.01264849	0.09819659	0.0	22	12	8	false	1010000111	10.0	4	2	false	0	889990905
14621	9.49344097	0.00693758	0.10533588	0.0	21	12	7	false	0010100110	10.0	5	2	false	0	406678996
14622	10.94651867	0.00560391	0.09135324	0.0	23	12	9	false	0010000111	10.0	3	2	false	0	259322481
14623	6.34106963	0.00491671	0.1577021	0.0	13	12	5	false	1100101010	10.0	7	2	false	0	855425912
14624	6.51059536	0.00365186	0.15359578	0.0	13	12	5	false	1010101010	10.0	7	2	false	0	126294828
14625	6.04238143	0.00398162	0.16549766	0.0	13	12	4	false	1001101010	10.0	8	2	false	0	147008224
14626	7.26135217	0.001418	0.1377154	0.0	15	12	4	false	1000111010	10.0	8	2	false	0	174539775
14627	4.92431887	8.9315E-4	0.20307377	0.0	9	12	2	false	1000101011	10.0	10	2	false	0	6536344
14628	5.21089808	0.0011856	0.1919055	0.0	10	12	3	false	1000101010	10.0	9	2	false	0	114341208
14629	7.16851665	0.00287707	0.13949887	0.0	14	12	6	false	0010101010	10.0	6	2	false	0	135525408
14630	6.57517659	0.01274619	0.15208717	0.0	14	12	5	false	0001101010	10.0	7	2	false	0	426538810
14631	7.81029263	0.00103933	0.12803618	0.0	16	12	4	false	0000111010	10.0	8	2	false	0	392678067
14632	5.4086781	0.00253415	0.18488806	0.0	10	12	3	false	0000101011	10.0	9	2	false	0	954321768
14633	5.69525732	0.00320158	0.17558469	0.0	11	12	4	false	0000101010	10.0	8	2	false	0	705325745
14634	6.83753784	0.00588057	0.14625148	0.0	14	12	5	false	0111101101	10.0	7	2	false	0	70590241
14635	7.21695257	0.01107467	0.13856264	0.0	15	12	6	false	1111101101	10.0	6	2	false	0	151871485
14636	7.59233098	0.00466793	0.13171186	0.0	16	12	6	false	0110011110	10.0	6	2	false	0	65260711
14637	7.97578204	0.00584145	0.12537955	0.0	17	12	6	false	0110011101	10.0	6	2	false	0	211205616
14638	9.53784057	0.0040218	0.10484554	0.0	18	12	7	false	0101110011	10.0	5	2	false	0	147675625
14639	7.47124117	0.00533155	0.13384657	0.0	15	12	6	false	1110011110	10.0	6	2	false	0	46005608
14640	7.85469223	0.00682495	0.12731244	0.0	16	12	6	false	1110011101	10.0	6	2	false	0	148949671
14641	8.96468214	0.00696731	0.11154885	0.0	17	12	7	false	1101110011	10.0	5	2	false	0	102790022
14642	7.41069627	0.00497991	0.13494009	0.0	14	12	6	false	0011101101	10.0	6	2	false	0	60258527
14643	6.73259334	0.00431467	0.14853118	0.0	13	12	5	false	1011101101	10.0	7	2	false	0	54984375
14644	8.09687185	0.01298466	0.12350449	0.0	18	12	6	false	1100100110	10.0	6	2	false	0	842018224
14645	9.44500505	0.00857209	0.10587607	0.0	20	12	8	false	1100000111	10.0	4	2	false	0	351618612
14646	8.70635721	0.0053773	0.1148586	0.0	17	12	6	false	0001110011	10.0	6	2	false	0	191223029
14647	7.91927346	0.01004941	0.12627421	0.0	19	12	5	false	0100100110	10.0	7	2	false	0	1128260986
14648	9.28355197	0.00773854	0.10771739	0.0	21	12	7	false	0100000111	10.0	5	2	false	0	844645066
14649	8.10898083	0.00727892	0.12332006	0.0	16	12	6	false	1001110011	10.0	6	2	false	0	139003792
14650	9.17860747	0.00674131	0.10894899	0.0	18	12	8	false	1010011110	10.0	4	2	false	0	165999012
14651	9.52573158	0.00833657	0.10497881	0.0	19	12	8	false	1010011101	10.0	4	2	false	0	197820822
14652	5.53380424	0.01146997	0.18070751	0.0	11	12	4	false	0111101010	10.0	8	2	false	0	2415475259
14653	5.90918264	0.00484169	0.16922814	0.0	11	12	4	false	0111001011	10.0	8	2	false	0	868387511
14654	9.86478305	0.00450991	0.1013707	0.0	19	12	8	false	0010011110	10.0	4	2	false	0	136583198
14655	10.30070636	0.00463284	0.09708072	0.0	20	12	8	false	0010011101	10.0	4	2	false	0	155206169
14656	5.77598385	0.02496668	0.17313068	0.0	11	12	5	false	1111101010	10.0	7	2	false	0	4306074787
14657	6.18365288	0.01667715	0.16171671	0.0	11	12	5	false	1111001011	10.0	7	2	false	0	2528100893
14658	6.8012109	0.01270583	0.14703264	0.0	12	12	5	false	1011001011	10.0	7	2	false	0	1333238871
14659	7.58425832	0.00261905	0.13185205	0.0	13	12	6	false	0011001011	10.0	6	2	false	0	115959823
14660	7.88698285	0.00865043	0.1267912	0.0	18	12	5	false	0000100110	10.0	7	2	false	0	525999175
14661	9.25126135	0.0108987	0.10809337	0.0	20	12	7	false	0000000111	10.0	5	2	false	0	467131752
14662	7.30575177	0.00905133	0.13687845	0.0	17	12	4	false	1000100110	10.0	8	2	false	0	211514594
14663	8.67003027	0.01327485	0.11533985	0.0	19	12	6	false	1000000111	10.0	6	2	false	0	272689336
14664	9.35822402	0.00308206	0.10685788	0.0	17	12	8	false	1101101101	10.0	4	2	false	0	32476384
14665	8.60544904	0.00714706	0.11620544	0.0	16	12	7	false	0101101101	10.0	5	2	false	0	102573630
14666	7.24520686	0.00812515	0.13802228	0.0	14	12	6	false	1100011110	10.0	6	2	false	0	158182724
14667	7.580222	0.0119816	0.13192226	0.0	15	12	6	false	1100011101	10.0	6	2	false	0	513457991
14668	7.47124117	0.00740791	0.13384657	0.0	15	12	6	false	0100011110	10.0	6	2	false	0	195011156
14669	7.80625631	0.01090104	0.12810238	0.0	16	12	6	false	0100011101	10.0	6	2	false	0	603526760
14670	7.790111	0.0042522	0.12836788	0.0	19	12	5	false	0110110011	10.0	7	2	false	0	448038968
14671	7.6851665	0.00695249	0.1301208	0.0	18	12	5	false	1110110011	10.0	7	2	false	0	415644870
14672	6.18365288	0.00490442	0.16171671	0.0	12	12	4	false	1011101100	10.0	8	2	false	0	92440201
14673	7.08779011	0.00298634	0.1410877	0.0	14	12	5	false	1001101101	10.0	7	2	false	0	41777515
14674	7.38244198	0.0162072	0.13545653	0.0	15	12	6	false	0101101010	10.0	6	2	false	0	461100337
14675	7.90312815	0.01043572	0.12653218	0.0	15	12	6	false	0101001011	10.0	6	2	false	0	264536605
14676	7.98385469	0.01034014	0.12525278	0.0	16	12	7	false	1101101010	10.0	5	2	false	0	142234602
14677	8.58930373	0.01089715	0.11642387	0.0	16	12	7	false	1101001011	10.0	5	2	false	0	170178257
14678	7.91523713	0.00669968	0.1263386	0.0	14	12	6	false	0000011110	10.0	6	2	false	0	174586990
14679	8.11301715	0.00655788	0.12325871	0.0	15	12	6	false	0000011101	10.0	6	2	false	0	537094346
14680	7.33400605	0.00992623	0.13635113	0.0	13	12	6	false	1000011110	10.0	6	2	false	0	363939554
14681	7.53178607	0.01096684	0.13277063	0.0	14	12	6	false	1000011101	10.0	6	2	false	0	791336021
14682	6.82542886	0.00591526	0.14651094	0.0	13	12	5	false	0011101100	10.0	7	2	false	0	90021341
14683	7.70131181	0.0077319	0.12984801	0.0	15	12	6	false	0001101101	10.0	6	2	false	0	120582114
14684	9.04540868	0.00349089	0.11055332	0.0	18	12	8	false	0001001011	10.0	4	2	false	0	220035852
14685	8.22199798	0.00916441	0.12162494	0.0	17	12	7	false	1001001011	10.0	5	2	false	0	299300530
14686	9.19475277	0.00321064	0.10875768	0.0	19	12	7	false	1010110011	10.0	5	2	false	0	49097117
14687	9.78405651	0.00295816	0.1022071	0.0	20	12	7	false	0010110011	10.0	5	2	false	0	74396534
14688	7.80625631	0.00367154	0.12810238	0.0	18	12	5	false	0100110011	10.0	7	2	false	0	508927712
14689	7.60040363	0.00539491	0.13157196	0.0	17	12	5	false	1100110011	10.0	7	2	false	0	351338551
14690	7.27346115	0.00514568	0.13748613	0.0	17	12	5	false	0110101101	10.0	7	2	false	0	95366893
14691	6.74470232	0.00611591	0.14826451	0.0	16	12	4	false	0110101100	10.0	8	2	false	0	157997545
14692	7.66902119	0.0079794	0.13039474	0.0	18	12	6	false	1110101101	10.0	6	2	false	0	173770023
14693	7.14026236	0.00928467	0.14005088	0.0	17	12	5	false	1110101100	10.0	7	2	false	0	223626387
14694	8.20181635	0.00269929	0.12192421	0.0	19	12	6	false	1010101101	10.0	6	2	false	0	90788850
14695	8.97275479	0.00183929	0.11144849	0.0	20	12	7	false	0010101101	10.0	5	2	false	0	15740335
14696	8.76690212	0.00284896	0.11406538	0.0	16	12	7	false	1110001011	10.0	5	2	false	0	87651766
14697	8.34712412	0.00198866	0.11980174	0.0	15	12	6	false	0110001011	10.0	6	2	false	0	52536728
14698	7.9556004	0.00247071	0.12569762	0.0	16	12	5	false	1000110011	10.0	7	2	false	0	65269117
14699	8.54490414	0.00208455	0.11702881	0.0	17	12	5	false	0000110011	10.0	7	2	false	0	108640663
14700	7.99192735	0.00275429	0.12512626	0.0	16	12	6	false	0111110101	10.0	6	2	false	0	50835024
14701	8.73057518	0.00453777	0.11453999	0.0	15	12	6	false	1010001011	10.0	6	2	false	0	147207406
14702	9.42078708	0.00278603	0.10614824	0.0	16	12	7	false	0010001011	10.0	5	2	false	0	94863843
14703	7.82240161	0.00512581	0.12783798	0.0	15	12	6	false	1111110101	10.0	6	2	false	0	96159092
14704	7.37937938	6.7894E-4	0.13551275	0.0	16	12	4	false	1111010011	10.0	8	2	false	0	1090348
14705	7.48348348	6.8635E-4	0.13362761	0.0	17	12	4	false	0111010011	10.0	8	2	false	0	975674
14706	8.49243189	0.01016904	0.1177519	0.0	15	12	8	false	1011110101	10.0	4	2	false	0	461687989
14707	9.09788093	0.00655631	0.10991571	0.0	16	12	8	false	0011110101	10.0	4	2	false	0	409578213
14708	7.57214934	0.00320559	0.1320629	0.0	17	12	6	false	1100101101	10.0	6	2	false	0	74835924
14709	7.06357215	0.00456604	0.14157143	0.0	16	12	5	false	0100101101	10.0	7	2	false	0	96633391
14710	6.53481332	0.00526423	0.15302656	0.0	15	12	4	false	0100101100	10.0	8	2	false	0	133739681
14711	8.56104945	0.00552313	0.11680811	0.0	17	12	6	false	1011010011	10.0	6	2	false	0	36553976
14712	9.16649849	0.00346985	0.10909291	0.0	18	12	6	false	0011010011	10.0	6	2	false	0	21901939
14713	8.30272452	0.00236916	0.12044239	0.0	19	12	6	false	0010101100	10.0	6	2	false	0	63487567
14714	7.14429869	0.00876007	0.13997175	0.0	14	12	5	false	0001101100	10.0	7	2	false	0	144924594
14715	6.95862765	0.00277674	0.1437065	0.0	15	12	5	false	0000101101	10.0	7	2	false	0	44385888
14716	6.42986882	0.00317656	0.15552417	0.0	14	12	4	false	0000101100	10.0	8	2	false	0	64878451
14717	7.04339051	0.00373077	0.14197708	0.0	16	12	5	false	1100101100	10.0	7	2	false	0	82006072
14718	7.58627649	0.00313158	0.13181697	0.0	18	12	5	false	1010101100	10.0	7	2	false	0	80636296
14719	6.54894046	0.00331885	0.15269646	0.0	13	12	4	false	1001101100	10.0	8	2	false	0	58163889
14720	6.40968718	0.00118733	0.15601385	0.0	14	12	4	false	1000101101	10.0	8	2	false	0	7398722
14721	5.88092836	0.00139702	0.17004118	0.0	13	12	3	false	1000101100	10.0	9	2	false	0	13467308
14722	7.89909183	0.00461248	0.12659683	0.0	14	12	6	false	0100001011	10.0	6	2	false	0	91674623
14723	8.42785066	0.00466723	0.11865421	0.0	15	12	7	false	1100001011	10.0	5	2	false	0	115333938
14724	8.1271443	0.00701951	0.12304445	0.0	14	12	6	false	1000001011	10.0	6	2	false	0	205607647
14725	8.82542886	0.00426383	0.11330894	0.0	15	12	7	false	0000001011	10.0	5	2	false	0	123952478
14726	9.73158426	0.00560483	0.10275819	0.0	17	12	8	false	1101110101	10.0	4	2	false	0	544868395
14727	10.30877901	0.00308714	0.0970047	0.0	18	12	8	false	0101110101	10.0	4	2	false	0	597925788
14728	6.30877901	0.00742194	0.15850928	0.0	13	12	4	false	0111101100	10.0	8	2	false	0	153346498
14729	5.99394551	0.00908679	0.16683502	0.0	13	12	4	false	0111001110	10.0	8	2	false	0	1225239584
14730	6.18365288	0.00491453	0.16171671	0.0	13	12	4	false	0111001101	10.0	8	2	false	0	159218099
14731	5.65489405	0.00670983	0.17683797	0.0	12	12	3	false	0111001100	10.0	9	2	false	0	367459286
14732	6.68819374	0.01412565	0.1495172	0.0	14	12	5	false	1111101100	10.0	7	2	false	0	337896143
14733	6.26841574	0.03939217	0.15952994	0.0	13	12	5	false	1111001110	10.0	7	2	false	0	5925419606
14734	6.4419778	0.02178976	0.15523183	0.0	13	12	5	false	1111001101	10.0	7	2	false	0	1014119757
14735	9.38042381	0.00262482	0.10660499	0.0	17	12	6	false	1101010011	10.0	6	2	false	0	53351653
14736	9.62058527	0.00241652	0.10394378	0.0	18	12	6	false	0101010011	10.0	6	2	false	0	41010826
14737	8.83551968	0.01239102	0.11317953	0.0	16	12	8	false	1001110101	10.0	4	2	false	0	1075238641
14738	9.42885974	0.00856558	0.10605736	0.0	17	12	8	false	0001110101	10.0	4	2	false	0	1190788231
14739	7.50756811	0.00847565	0.13319892	0.0	15	12	7	false	0011001110	10.0	5	2	false	0	859774502
14740	7.61251261	0.00781884	0.13136267	0.0	15	12	7	false	0011001101	10.0	5	2	false	0	503392358
14741	5.91321897	0.02987978	0.16911263	0.0	12	12	4	false	1111001100	10.0	8	2	false	0	2315060609
14742	6.76488396	0.04045738	0.1478222	0.0	14	12	6	false	1011001110	10.0	6	2	false	0	5882798388
14743	6.89404642	0.03353223	0.14505269	0.0	14	12	6	false	1011001101	10.0	6	2	false	0	2149928204
14744	10.56710394	0.00441664	0.09463331	0.0	19	12	8	false	0001010011	10.0	4	2	false	0	366850169
14745	9.93743693	0.0056314	0.10062957	0.0	18	12	8	false	1001010011	10.0	4	2	false	0	227992399
14746	8.29868819	0.01175018	0.12050097	0.0	18	12	7	false	1110110101	10.0	5	2	false	0	687107030
14747	8.40363269	0.00673035	0.11899616	0.0	19	12	7	false	0110110101	10.0	5	2	false	0	825796475
14748	8.04843592	0.00848899	0.12424774	0.0	15	12	6	false	0101101100	10.0	6	2	false	0	115164440
14749	7.95963673	0.01196878	0.12563387	0.0	17	12	6	false	0101001110	10.0	6	2	false	0	495483275
14750	8.21594349	0.00754905	0.12171457	0.0	17	12	6	false	0101001101	10.0	6	2	false	0	212274344
14751	8.79313824	0.00369554	0.11372504	0.0	16	12	7	false	1101101100	10.0	5	2	false	0	33433242
14752	8.64984864	0.01074383	0.11560896	0.0	18	12	7	false	1101001110	10.0	5	2	false	0	211849889
14753	8.90010091	0.00715357	0.11235828	0.0	18	12	7	false	1101001101	10.0	5	2	false	0	62499538
14754	6.34106963	0.04776217	0.1577021	0.0	13	12	5	false	1011001100	10.0	7	2	false	0	4563171054
14755	7.23713421	0.01797113	0.13817624	0.0	15	12	6	false	1001001110	10.0	6	2	false	0	1840336842
14756	7.31382442	0.02062668	0.13672737	0.0	15	12	6	false	1001001101	10.0	6	2	false	0	1295894481
14757	7.580222	0.0037727	0.13192226	0.0	16	12	6	false	0111110010	10.0	6	2	false	0	229232918
14758	7.31382442	0.00490323	0.13672737	0.0	17	12	4	false	0111100011	10.0	8	2	false	0	229089158
14759	9.03128153	0.00293908	0.11072626	0.0	20	12	6	false	0110010011	10.0	6	2	false	0	94717424
14760	7.02320888	0.01183296	0.14238506	0.0	14	12	6	false	0011001100	10.0	6	2	false	0	842834463
14761	7.9394551	0.00754129	0.12595323	0.0	16	12	7	false	0001001110	10.0	5	2	false	0	675778063
14762	7.96367306	0.00975746	0.1255702	0.0	16	12	7	false	0001001101	10.0	5	2	false	0	677174372
14763	8.93239152	0.00367143	0.1119521	0.0	19	12	6	false	1110010011	10.0	6	2	false	0	66111232
14764	7.3864783	0.00644428	0.13538251	0.0	15	12	6	false	1111110010	10.0	6	2	false	0	392218112
14765	7.32996973	0.01102721	0.13642621	0.0	16	12	5	false	1111100011	10.0	7	2	false	0	490682364
14766	10.91019173	0.00357379	0.09165742	0.0	20	12	9	false	0010110101	10.0	3	2	false	0	65361047
14767	10.30070636	0.00403661	0.09708072	0.0	19	12	9	false	1010110101	10.0	3	2	false	0	39394223
14768	7.94349142	0.01045895	0.12588923	0.0	15	12	7	false	1011110010	10.0	5	2	false	0	262581718
14769	7.02320888	0.00567747	0.14238506	0.0	15	12	4	false	1011100011	10.0	8	2	false	0	255608959
14770	8.55701312	0.00794102	0.11686321	0.0	16	12	7	false	0011110010	10.0	5	2	false	0	245873807
14771	7.64480323	0.00514861	0.13080781	0.0	16	12	5	false	0011100011	10.0	7	2	false	0	127908681
14772	10.43794147	0.00512687	0.09580433	0.0	21	12	7	false	0010010011	10.0	5	2	false	0	208408262
14773	9.84460141	0.00601069	0.10157852	0.0	20	12	7	false	1010010011	10.0	5	2	false	0	137368415
14774	7.8345106	0.00379072	0.12764039	0.0	14	12	7	false	1111111100	10.0	5	2	false	0	21707717
14775	7.54389506	0.00343313	0.13255752	0.0	14	12	6	false	1111111001	10.0	6	2	false	0	44844368
14776	8.02421796	0.00210823	0.12462274	0.0	14	12	7	false	0111111100	10.0	5	2	false	0	14467090
14777	7.78405651	0.00181962	0.12846772	0.0	15	12	6	false	0111111001	10.0	6	2	false	0	30942307
14778	8.23410696	0.01299407	0.12144608	0.0	17	12	7	false	1100110101	10.0	5	2	false	0	1123393368
14779	8.44399596	0.00843156	0.11842734	0.0	18	12	7	false	0100110101	10.0	5	2	false	0	1408926785
14780	7.75983855	0.00377215	0.12886866	0.0	15	12	6	false	0110001110	10.0	6	2	false	0	104844561
14781	7.71745711	0.00457964	0.12957636	0.0	16	12	6	false	0110001101	10.0	6	2	false	0	110916946
14782	7.18869828	0.00569743	0.13910724	0.0	15	12	5	false	0110001100	10.0	7	2	false	0	105791525
14783	8.16145308	0.00788932	0.1225272	0.0	16	12	7	false	1110001110	10.0	5	2	false	0	285414329
14784	8.12916246	0.00889875	0.1230139	0.0	17	12	7	false	1110001101	10.0	5	2	false	0	260232785
14785	9.24722503	0.00804085	0.10814055	0.0	17	12	8	false	1101110010	10.0	4	2	false	0	187538913
14786	9.13017154	0.00670336	0.10952697	0.0	17	12	7	false	1101100011	10.0	5	2	false	0	77086887
14787	9.83652876	0.00472121	0.10166188	0.0	18	12	8	false	0101110010	10.0	4	2	false	0	217720295
14788	8.96468214	0.00921277	0.11154885	0.0	18	12	6	false	0101100011	10.0	6	2	false	0	262355382
14789	8.69424823	0.00481147	0.11501857	0.0	18	12	6	false	1100010011	10.0	6	2	false	0	126033721
14790	9.11402624	0.00644637	0.10972099	0.0	17	12	7	false	0000110101	10.0	5	2	false	0	925183762
14791	8.84157417	0.00415547	0.11310203	0.0	19	12	6	false	0100010011	10.0	6	2	false	0	225061383
14792	8.02018163	0.01660629	0.12468546	0.0	15	12	8	false	1011111100	10.0	4	2	false	0	1300685797
14793	7.53985873	0.01441495	0.13262848	0.0	14	12	7	false	1011111001	10.0	5	2	false	0	702100150
14794	8.68617558	0.0078041	0.11512546	0.0	16	12	8	false	0011111100	10.0	4	2	false	0	602654537
14795	8.17759839	0.00734586	0.12228529	0.0	15	12	7	false	0011111001	10.0	5	2	false	0	317051538
14796	8.53279516	0.00775934	0.11719489	0.0	16	12	7	false	1000110101	10.0	5	2	false	0	686184514
14797	7.27346115	0.00900802	0.13748613	0.0	15	12	5	false	1011100010	10.0	7	2	false	0	749520584
14798	8.39152371	0.00986093	0.11916787	0.0	16	12	7	false	1001110010	10.0	5	2	false	0	313977433
14799	7.48335015	0.00331869	0.13362999	0.0	16	12	4	false	1001100011	10.0	8	2	false	0	112318312
14800	9.39455096	0.00423535	0.10644468	0.0	18	12	8	false	0010001110	10.0	4	2	false	0	166352983
14801	9.5136226	0.0040216	0.10511243	0.0	19	12	8	false	0010001101	10.0	4	2	false	0	165214216
14802	7.60040363	0.01103007	0.13157196	0.0	16	12	6	false	1110001100	10.0	6	2	false	0	245501140
14803	8.63370333	0.00983279	0.11582515	0.0	17	12	7	false	1010001110	10.0	5	2	false	0	358391285
14804	8.70232089	0.01077327	0.11491187	0.0	18	12	7	false	1010001101	10.0	5	2	false	0	342500868
14805	7.89909183	0.00699121	0.12659683	0.0	16	12	6	false	0011100010	10.0	6	2	false	0	334813972
14806	9.00504541	0.00761907	0.11104886	0.0	17	12	7	false	0001110010	10.0	5	2	false	0	366377117
14807	8.08476287	0.00807655	0.12368947	0.0	17	12	5	false	0001100011	10.0	7	2	false	0	241242910
14808	9.29969728	0.00823122	0.10753038	0.0	19	12	7	false	1000010011	10.0	5	2	false	0	180646639
14809	9.89303734	0.0072161	0.10108119	0.0	20	12	7	false	0000010011	10.0	5	2	false	0	386689751
14810	7.4954955	9.768E-4	0.13341346	0.0	16	12	4	false	1111010110	10.0	8	2	false	0	4197149
14811	5.56793744	3.49E-4	0.17959972	0.0	12	12	3	false	1111010101	10.0	9	2	false	0	90637
14812	5.06744868	4.4688E-4	0.19733796	0.0	11	12	2	false	1111010100	10.0	10	2	false	0	150318
14813	7.63163163	9.6844E-4	0.13103358	0.0	17	12	4	false	0111010110	10.0	8	2	false	0	4740360
14814	5.50537634	3.7435E-4	0.18164062	0.0	11	12	3	false	0111010101	10.0	9	2	false	0	109289
14815	5.00488759	4.7462E-4	0.19980469	0.0	10	12	2	false	0111010100	10.0	10	2	false	0	151015
14816	8.72653885	0.00555065	0.11459297	0.0	16	12	6	false	0011010110	10.0	6	2	false	0	203491593
14817	7.790111	0.00300207	0.12836788	0.0	15	12	5	false	0011010101	10.0	7	2	false	0	57704377
14818	8.11705348	0.00720938	0.12319741	0.0	15	12	6	false	1011010110	10.0	6	2	false	0	329931705
14819	7.15237134	0.00430424	0.13981377	0.0	14	12	5	false	1011010101	10.0	7	2	false	0	83844881
14820	9.95156408	0.00246498	0.10048672	0.0	18	12	9	false	0101111100	10.0	3	2	false	0	250911135
14821	9.6185671	0.00228562	0.10396559	0.0	17	12	8	false	0101111001	10.0	4	2	false	0	79003726
14822	9.33198789	0.00473704	0.1071583	0.0	17	12	9	false	1101111100	10.0	3	2	false	0	373820483
14823	8.99293643	0.00462744	0.11119838	0.0	16	12	8	false	1101111001	10.0	4	2	false	0	94894174
14824	7.65287588	0.00940962	0.13066983	0.0	16	12	5	false	0101001100	10.0	7	2	false	0	225274791
14825	7.41271443	0.00735267	0.13490335	0.0	14	12	6	false	0100001110	10.0	6	2	false	0	229146956
14826	7.45105954	0.00786444	0.1342091	0.0	15	12	6	false	0100001101	10.0	6	2	false	0	237031783
14827	6.92230071	0.00946396	0.14446064	0.0	14	12	5	false	0100001100	10.0	7	2	false	0	247026657
14828	8.33097881	0.00893118	0.12003391	0.0	17	12	6	false	1101001100	10.0	6	2	false	0	99247532
14829	7.92936428	0.0067775	0.12611351	0.0	15	12	7	false	1100001110	10.0	5	2	false	0	167996995
14830	7.96770938	0.00692409	0.12550659	0.0	16	12	7	false	1100001101	10.0	5	2	false	0	140201786
14831	8.35519677	0.01799476	0.11968599	0.0	16	12	8	false	1001111100	10.0	4	2	false	0	1864313175
14832	8.04036327	0.0105485	0.12437249	0.0	15	12	7	false	1001111001	10.0	5	2	false	0	386128936
14833	8.97880928	0.00970243	0.11137334	0.0	17	12	8	false	0001111100	10.0	4	2	false	0	1114114565
14834	8.6740666	0.00593831	0.11528618	0.0	16	12	7	false	0001111001	10.0	5	2	false	0	265558065
14835	8.07265388	0.0065619	0.123875	0.0	19	12	6	false	0110110010	10.0	6	2	false	0	588816343
14836	7.82240161	0.00384571	0.12783798	0.0	20	12	4	false	0110100011	10.0	8	2	false	0	239547640
14837	8.07265388	0.00630444	0.123875	0.0	20	12	5	false	0110100010	10.0	7	2	false	0	496184248
14838	7.96770938	0.01045528	0.12550659	0.0	18	12	6	false	1110110010	10.0	6	2	false	0	779532177
14839	7.94349142	0.00814745	0.12588923	0.0	19	12	5	false	1110100011	10.0	7	2	false	0	447086868
14840	7.43895055	0.00842083	0.13442756	0.0	15	12	6	false	1100001100	10.0	6	2	false	0	142754537
14841	8.04843592	0.01588644	0.12424774	0.0	17	12	6	false	1010001100	10.0	6	2	false	0	360286711
14842	6.77295661	0.02409421	0.14764601	0.0	14	12	5	false	1001001100	10.0	7	2	false	0	1905660899
14843	7.07568113	0.00640228	0.14132915	0.0	13	12	5	false	1000001110	10.0	7	2	false	0	278896276
14844	6.95055499	0.00904032	0.1438734	0.0	13	12	5	false	1000001101	10.0	7	2	false	0	331118271
14845	6.42179617	0.01012812	0.15571967	0.0	12	12	4	false	1000001100	10.0	8	2	false	0	396480994
14846	8.8012109	0.0068443	0.11362073	0.0	18	12	7	false	0010001100	10.0	5	2	false	0	217711986
14847	7.40464178	0.01079971	0.13505042	0.0	15	12	6	false	0001001100	10.0	6	2	false	0	706226825
14848	7.69727548	0.00441056	0.1299161	0.0	14	12	6	false	0000001110	10.0	6	2	false	0	154346196
14849	7.53178607	0.00632226	0.13277063	0.0	14	12	6	false	0000001101	10.0	6	2	false	0	243033190
14850	7.00302725	0.00658876	0.14279539	0.0	13	12	5	false	0000001100	10.0	7	2	false	0	229807294
14851	9.24117053	0.00201976	0.1082114	0.0	17	12	6	false	1101010110	10.0	6	2	false	0	57808944
14852	7.65691221	0.002057	0.13060095	0.0	15	12	5	false	1101010101	10.0	7	2	false	0	292624410
14853	9.78002018	0.00174523	0.10224928	0.0	18	12	6	false	0101010110	10.0	6	2	false	0	106156315
14854	8.01614531	0.00167226	0.12474824	0.0	16	12	5	false	0101010101	10.0	7	2	false	0	651013182
14855	8.19374369	0.01380119	0.12204433	0.0	19	12	6	false	1110100010	10.0	6	2	false	0	1204917413
14856	9.6185671	0.00621785	0.10396559	0.0	18	12	8	false	1010110010	10.0	4	2	false	0	89301059
14857	8.11705348	0.00386609	0.12319741	0.0	19	12	5	false	1010100011	10.0	7	2	false	0	133384443
14858	10.21594349	0.00596025	0.09788621	0.0	19	12	8	false	0010110010	10.0	4	2	false	0	149538782
14859	8.77497477	0.00223947	0.11396044	0.0	20	12	6	false	0010100011	10.0	6	2	false	0	36736139
14860	7.17255298	0.00224363	0.13942037	0.0	14	12	4	false	0011010100	10.0	8	2	false	0	21025770
14861	9.07366297	0.00590411	0.11020907	0.0	17	12	6	false	0001010110	10.0	6	2	false	0	301358073
14862	8.06458123	0.00539852	0.123999	0.0	16	12	5	false	0001010101	10.0	7	2	false	0	138961466
14863	6.55903128	0.00309946	0.15246154	0.0	13	12	4	false	1011010100	10.0	8	2	false	0	31287660
14864	8.47830474	0.00751166	0.11794811	0.0	16	12	6	false	1001010110	10.0	6	2	false	0	296224553
14865	7.45509586	0.00711164	0.13413644	0.0	15	12	5	false	1001010101	10.0	7	2	false	0	153806434
14866	8.32694248	0.00710108	0.1200921	0.0	17	12	7	false	0110111100	10.0	5	2	false	0	236184441
14867	8.09283552	0.00437657	0.12356608	0.0	17	12	6	false	0110111001	10.0	6	2	false	0	244735021
14868	8.20585267	0.00987043	0.12186424	0.0	16	12	7	false	1110111100	10.0	5	2	false	0	232768883
14869	7.98789102	0.00624277	0.12518949	0.0	16	12	6	false	1110111001	10.0	6	2	false	0	192296427
14870	8.08476287	0.00661177	0.12368947	0.0	18	12	6	false	0100110010	10.0	6	2	false	0	643148536
14871	7.55600404	0.0034858	0.13234509	0.0	19	12	4	false	0100100011	10.0	8	2	false	0	353319893
14872	7.80625631	0.00636577	0.12810238	0.0	19	12	5	false	0100100010	10.0	7	2	false	0	558590584
14873	7.88294652	0.00949791	0.12685612	0.0	17	12	6	false	1100110010	10.0	6	2	false	0	591585950
14874	7.74974773	0.00368234	0.12903646	0.0	18	12	5	false	1100100011	10.0	7	2	false	0	206738468
14875	9.8284561	0.00545614	0.10174538	0.0	19	12	9	false	1010111100	10.0	3	2	false	0	65540054
14876	9.21493441	0.00404525	0.10851949	0.0	17	12	8	false	1010111001	10.0	4	2	false	0	78814082
14877	10.55499495	0.00370104	0.09474187	0.0	20	12	9	false	0010111100	10.0	3	2	false	0	62561873
14878	9.83652876	0.00335821	0.10166188	0.0	18	12	8	false	0010111001	10.0	4	2	false	0	94420222
14879	8.0	0.00764445	0.125	0.0	18	12	6	false	1100100010	10.0	6	2	false	0	483957505
14880	8.38345106	0.00793499	0.11928262	0.0	19	12	6	false	1010100010	10.0	6	2	false	0	505740460
14881	7.73360242	0.00538318	0.12930585	0.0	16	12	5	false	1001100010	10.0	7	2	false	0	306737285
14882	8.3148335	0.00466389	0.12026699	0.0	16	12	6	false	1000110010	10.0	6	2	false	0	133301559
14883	6.94248234	0.00153728	0.1440407	0.0	17	12	3	false	1000100011	10.0	9	2	false	0	28936001
14884	7.19273461	0.00409328	0.13902918	0.0	17	12	4	false	1000100010	10.0	8	2	false	0	91703326
14885	9.0554995	0.00441741	0.11043013	0.0	20	12	7	false	0010100010	10.0	5	2	false	0	159194172
14886	8.3370333	0.00979143	0.11994674	0.0	17	12	6	false	0001100010	10.0	6	2	false	0	502692018
14887	8.91220989	0.00428201	0.11220562	0.0	17	12	6	false	0000110010	10.0	6	2	false	0	185033924
14888	7.52371342	0.00230925	0.13291309	0.0	18	12	4	false	0000100011	10.0	8	2	false	0	127142172
14889	7.77396569	0.00469751	0.12863448	0.0	18	12	5	false	0000100010	10.0	7	2	false	0	227450242
14890	8.17356206	0.00341348	0.12234568	0.0	19	12	5	false	1110010110	10.0	7	2	false	0	33508352
14891	6.91019173	0.00343124	0.14471379	0.0	17	12	4	false	1110010101	10.0	8	2	false	0	232407059
14892	6.40968718	0.00107037	0.15601385	0.0	16	12	3	false	1110010100	10.0	9	2	false	0	54239250
14893	8.29465187	0.00324929	0.12055961	0.0	20	12	5	false	0110010110	10.0	7	2	false	0	69378454
14894	7.03128153	0.00266242	0.14222158	0.0	18	12	4	false	0110010101	10.0	8	2	false	0	383565451
14895	6.53077699	9.0953E-4	0.15312114	0.0	17	12	3	false	0110010100	10.0	9	2	false	0	107794273
14896	7.46316852	0.00345135	0.13399135	0.0	15	12	5	false	0111110100	10.0	7	2	false	0	126711166
14897	8.41170535	0.00295634	0.11888196	0.0	17	12	6	false	0111100101	10.0	6	2	false	0	74590326
14898	7.29364279	0.00614	0.1371057	0.0	14	12	5	false	1111110100	10.0	7	2	false	0	269068032
14899	8.3592331	0.00813554	0.1196282	0.0	16	12	7	false	1111100101	10.0	5	2	false	0	263612816
14900	10.19979818	0.00477552	0.09804116	0.0	21	12	7	false	0010010110	10.0	5	2	false	0	121342640
14901	9.41675076	0.00204728	0.10619374	0.0	19	12	6	false	0010010101	10.0	6	2	false	0	15350126
14902	9.56811302	0.00613183	0.10451382	0.0	20	12	7	false	1010010110	10.0	5	2	false	0	162003449
14903	8.74268416	0.00289002	0.11438135	0.0	18	12	6	false	1010010101	10.0	6	2	false	0	25799338
14904	7.56407669	0.00581298	0.13220384	0.0	17	12	5	false	0111100010	10.0	7	2	false	0	389053923
14905	8.14530777	0.0026026	0.12277007	0.0	18	12	5	false	0111000011	10.0	7	2	false	0	62864349
14906	7.96367306	0.01105799	0.1255702	0.0	15	12	7	false	1100111100	10.0	5	2	false	0	633981409
14907	7.77396569	0.00559441	0.12863448	0.0	15	12	6	false	1100111001	10.0	6	2	false	0	253266592
14908	7.87487386	0.0135684	0.12698616	0.0	14	12	7	false	1011110100	10.0	5	2	false	0	755800518
14909	8.03229062	0.00945426	0.12449749	0.0	15	12	7	false	1011100101	10.0	5	2	false	0	360341464
14910	8.47225025	0.0098621	0.1180324	0.0	15	12	7	false	0011110100	10.0	5	2	false	0	582885810
14911	8.70232089	0.00526409	0.11491187	0.0	16	12	8	false	0011100101	10.0	4	2	false	0	243372934
14912	8.18970737	0.00840609	0.12210448	0.0	16	12	7	false	0100111100	10.0	5	2	false	0	570054423
14913	7.97981837	0.00424769	0.12531614	0.0	16	12	6	false	0100111001	10.0	6	2	false	0	371351282
14914	7.580222	0.01387519	0.13192226	0.0	16	12	6	false	1111100010	10.0	6	2	false	0	1112731576
14915	8.15338042	0.00878359	0.12264851	0.0	17	12	6	false	1111000011	10.0	6	2	false	0	175667938
14916	8.48839556	0.00500292	0.11780789	0.0	15	12	7	false	0000111100	10.0	5	2	false	0	508253867
14917	8.629667	0.00204607	0.11587933	0.0	16	12	6	false	0000111001	10.0	6	2	false	0	109411762
14918	8.49646821	0.00799366	0.11769596	0.0	17	12	6	false	1011000011	10.0	6	2	false	0	93190425
14919	7.90716448	0.00771037	0.12646759	0.0	14	12	7	false	1000111100	10.0	5	2	false	0	717120383
14920	8.02421796	0.00282204	0.12462274	0.0	15	12	6	false	1000111001	10.0	6	2	false	0	110759328
14921	9.22300706	0.00287971	0.10842451	0.0	18	12	7	false	0011000011	10.0	5	2	false	0	18737200
14922	5.85898709	9.5286E-4	0.17067797	0.0	13	12	4	false	0111011100	10.0	8	2	false	0	1029215
14923	5.65243297	7.0947E-4	0.17691497	0.0	11	12	3	false	0111011010	10.0	9	2	false	0	379375
14924	5.38719212	6.5279E-4	0.18562546	0.0	11	12	3	false	0111011001	10.0	9	2	false	0	271612
14925	5.9225422	8.3008E-4	0.16884641	0.0	13	12	4	false	1111011100	10.0	8	2	false	0	974183
14926	5.73187686	6.6278E-4	0.17446292	0.0	11	12	3	false	1111011010	10.0	9	2	false	0	359221
14927	5.4817734	5.785E-4	0.18242272	0.0	11	12	3	false	1111011001	10.0	9	2	false	0	245368
14928	7.10797175	0.00109547	0.14068711	0.0	14	12	4	false	1101010100	10.0	8	2	false	0	113548781
14929	7.94349142	0.0045872	0.12588923	0.0	18	12	5	false	1100010110	10.0	7	2	false	0	58696384
14930	6.74066599	0.00465052	0.14835329	0.0	16	12	4	false	1100010101	10.0	8	2	false	0	545884028
14931	6.23612513	0.00181829	0.16035599	0.0	15	12	3	false	1100010100	10.0	9	2	false	0	167880016
14932	7.45509586	9.2578E-4	0.13413644	0.0	15	12	4	false	0101010100	10.0	8	2	false	0	10549932
14933	8.16952573	0.00423952	0.12240613	0.0	19	12	5	false	0100010110	10.0	7	2	false	0	131299518
14934	6.9667003	0.00380369	0.14353998	0.0	17	12	4	false	0100010101	10.0	8	2	false	0	1175070720
14935	6.46215943	0.00155971	0.15474703	0.0	16	12	3	false	0100010100	10.0	9	2	false	0	382992881
14936	9.73158426	0.00372876	0.10275819	0.0	17	12	7	false	0101110100	10.0	5	2	false	0	466705009
14937	10.03834511	0.00355693	0.09961801	0.0	18	12	8	false	0101100101	10.0	4	2	false	0	425596011
14938	9.15842583	0.00665699	0.10918907	0.0	16	12	7	false	1101110100	10.0	5	2	false	0	551695652
14939	10.07063572	0.00356039	0.0992986	0.0	17	12	9	false	1101100101	10.0	3	2	false	0	175303259
14940	8.02421796	0.00198292	0.12462274	0.0	17	12	5	false	1010010100	10.0	7	2	false	0	12417755
14941	6.90211907	0.00321974	0.14488304	0.0	14	12	4	false	1001010100	10.0	8	2	false	0	39616784
14942	7.90312815	0.00661856	0.12653218	0.0	17	12	5	false	1000010110	10.0	7	2	false	0	74171567
14943	6.82139253	0.00613165	0.14659763	0.0	15	12	4	false	1000010101	10.0	8	2	false	0	83030224
14944	7.06760848	0.03249066	0.14149058	0.0	14	12	7	false	1011011100	10.0	5	2	false	0	3059679094
14945	7.10797175	0.00691948	0.14068711	0.0	14	12	5	false	1011011010	10.0	7	2	false	0	510404203
14946	6.63572149	0.02004853	0.15069951	0.0	13	12	5	false	1011011001	10.0	7	2	false	0	1290553245
14947	7.73360242	0.01138504	0.12930585	0.0	15	12	7	false	0011011100	10.0	5	2	false	0	929575373
14948	7.70534813	0.00304398	0.12977999	0.0	15	12	5	false	0011011010	10.0	7	2	false	0	115113761
14949	7.2815338	0.00759567	0.1373337	0.0	14	12	5	false	0011011001	10.0	7	2	false	0	376655103
14950	6.30877901	0.00213809	0.15850928	0.0	14	12	3	false	1000010100	10.0	9	2	false	0	14522167
14951	8.66195762	0.00148511	0.11544734	0.0	18	12	5	false	0010010100	10.0	7	2	false	0	14614131
14952	7.49949546	0.0023326	0.1333423	0.0	15	12	4	false	0001010100	10.0	8	2	false	0	35258956
14953	8.48435923	0.00531785	0.11786394	0.0	18	12	5	false	0000010110	10.0	7	2	false	0	102479725
14954	7.40262361	0.00511806	0.13508724	0.0	16	12	4	false	0000010101	10.0	8	2	false	0	81892723
14955	6.89001009	0.00161742	0.14513767	0.0	15	12	3	false	0000010100	10.0	9	2	false	0	14047181
14956	9.21695257	0.00983662	0.10849573	0.0	18	12	7	false	0101100010	10.0	5	2	false	0	398745499
14957	9.86881937	0.00609986	0.10132924	0.0	19	12	7	false	0101000011	10.0	5	2	false	0	116165368
14958	8.26236125	0.01394562	0.12103078	0.0	15	12	7	false	1001110100	10.0	5	2	false	0	1234597390
14959	8.47628658	0.00662066	0.11797619	0.0	16	12	7	false	1001100101	10.0	5	2	false	0	279208560
14960	9.38446014	0.0075241	0.10655914	0.0	17	12	8	false	1101100010	10.0	4	2	false	0	131491239
14961	10.02623613	0.00692991	0.09973833	0.0	18	12	8	false	1101000011	10.0	4	2	false	0	49637490
14962	8.85166498	0.01024368	0.1129731	0.0	16	12	7	false	0001110100	10.0	5	2	false	0	1120291220
14963	9.10998991	0.0070742	0.10976961	0.0	17	12	8	false	0001100101	10.0	4	2	false	0	606921260
14964	9.81634712	0.00757851	0.10187089	0.0	18	12	8	false	1001000011	10.0	4	2	false	0	291639248
14965	10.58526741	0.00473518	0.09447092	0.0	19	12	9	false	0001000011	10.0	3	2	false	0	341227234
14966	7.73360242	0.00474962	0.12930585	0.0	16	12	6	false	1101011100	10.0	6	2	false	0	226756775
14967	8.13319879	0.00397643	0.12295285	0.0	18	12	5	false	1101011010	10.0	7	2	false	0	86008573
14968	7.95963673	0.00315012	0.12563387	0.0	16	12	5	false	1101011001	10.0	7	2	false	0	165621307
14969	8.11503532	0.00478057	0.12322805	0.0	17	12	6	false	0101011100	10.0	6	2	false	0	200517235
14970	8.14530777	0.00406841	0.12277007	0.0	17	12	5	false	0101011010	10.0	7	2	false	0	168757773
14971	7.94954591	0.00366375	0.12579335	0.0	15	12	5	false	0101011001	10.0	7	2	false	0	323259326
14972	7.42684157	0.02998546	0.13464674	0.0	15	12	7	false	1001011100	10.0	5	2	false	0	2845878863
14973	8.41775984	0.00488128	0.11879645	0.0	17	12	7	false	1001011010	10.0	5	2	false	0	148184022
14974	8.40766902	0.0091788	0.11893903	0.0	17	12	7	false	1001011001	10.0	5	2	false	0	303194076
14975	8.05045409	0.01339775	0.1242166	0.0	16	12	7	false	0001011100	10.0	5	2	false	0	1235285815
14976	9.05953582	0.00282471	0.11038093	0.0	18	12	7	false	0001011010	10.0	5	2	false	0	90600974
14977	9.12411705	0.00458205	0.10959965	0.0	18	12	7	false	0001011001	10.0	5	2	false	0	189891771
14978	7.87487386	0.00899112	0.12698616	0.0	18	12	6	false	0110110100	10.0	6	2	false	0	689669682
14979	8.80726539	0.00573212	0.11354262	0.0	20	12	7	false	0110100101	10.0	5	2	false	0	749071113
14980	7.76992936	0.01532051	0.1287013	0.0	17	12	6	false	1110110100	10.0	6	2	false	0	982135760
14981	8.839556	0.01467027	0.11312785	0.0	19	12	8	false	1110100101	10.0	4	2	false	0	857570953
14982	9.74974773	0.00289646	0.10256676	0.0	21	12	7	false	0110000011	10.0	5	2	false	0	31235312
14983	9.55398587	0.00773072	0.10466836	0.0	18	12	8	false	1010110100	10.0	4	2	false	0	115737458
14984	9.33198789	0.00821495	0.1071583	0.0	20	12	8	false	1010100101	10.0	4	2	false	0	408465049
14985	9.83652876	0.00430982	0.10166188	0.0	20	12	8	false	1110000011	10.0	4	2	false	0	82500667
14986	10.15136226	0.00733932	0.09850895	0.0	19	12	8	false	0010110100	10.0	4	2	false	0	198124533
14987	10.05045409	0.00353212	0.09949799	0.0	21	12	9	false	0010100101	10.0	3	2	false	0	153129768
14988	9.89707366	0.00634994	0.10103997	0.0	20	12	7	false	1010000011	10.0	5	2	false	0	171622047
14989	10.55095863	0.00424756	0.09477812	0.0	21	12	8	false	0010000011	10.0	4	2	false	0	120763071
14990	6.34712412	0.00509024	0.15755167	0.0	13	12	4	false	0111101001	10.0	8	2	false	0	149100224
14991	6.74066599	0.00921889	0.14835329	0.0	14	12	5	false	1111101001	10.0	7	2	false	0	217630500
14992	7.44702321	0.00690927	0.13428184	0.0	16	12	6	false	0110011100	10.0	6	2	false	0	162120615
14993	7.71745711	0.00220135	0.12957636	0.0	16	12	5	false	0110011010	10.0	7	2	false	0	80294021
14994	7.45913219	0.0043048	0.13406385	0.0	16	12	5	false	0110011001	10.0	7	2	false	0	283705571
14995	7.70534813	0.01636343	0.12977999	0.0	16	12	6	false	1100110100	10.0	6	2	false	0	1185865849
14996	8.60948537	0.01021403	0.11615096	0.0	18	12	8	false	1100100101	10.0	4	2	false	0	575265757
14997	7.3259334	0.00763583	0.13650138	0.0	15	12	6	false	1110011100	10.0	6	2	false	0	131195088
14998	7.7457114	0.00263589	0.1291037	0.0	16	12	5	false	1110011010	10.0	7	2	false	0	52996175
14999	7.49142281	0.00481597	0.13348599	0.0	16	12	5	false	1110011001	10.0	7	2	false	0	180888858
15000	7.91523713	0.01073972	0.1263386	0.0	17	12	6	false	0100110100	10.0	6	2	false	0	1068585187
15001	8.5247225	0.00674203	0.11730587	0.0	19	12	7	false	0100100101	10.0	5	2	false	0	1025819651
15002	8.85166498	0.01126707	0.1129731	0.0	18	12	8	false	1010011100	10.0	4	2	false	0	177358986
15003	8.56508577	0.00424822	0.11675306	0.0	15	12	6	false	1010011010	10.0	6	2	false	0	67865097
15004	8.27447023	0.00875253	0.12085366	0.0	16	12	6	false	1010011001	10.0	6	2	false	0	225996848
15005	9.57820383	0.00635749	0.10440371	0.0	19	12	8	false	0010011100	10.0	4	2	false	0	142755858
15006	9.15842583	0.00350712	0.10918907	0.0	16	12	6	false	0010011010	10.0	6	2	false	0	55680732
15007	8.89606458	0.00650665	0.11240926	0.0	17	12	6	false	0010011001	10.0	6	2	false	0	221317419
15008	5.95761857	0.00600168	0.1678523	0.0	11	12	4	false	1011101001	10.0	8	2	false	0	78720717
15009	6.57114026	0.00677136	0.15218059	0.0	12	12	5	false	0011101001	10.0	7	2	false	0	78556025
15010	8.58526741	0.00737767	0.11647861	0.0	16	12	6	false	0000110100	10.0	6	2	false	0	656083336
15011	8.54894046	0.00564568	0.11697356	0.0	18	12	7	false	0000100101	10.0	5	2	false	0	499878819
15012	9.36226034	0.00450679	0.10681181	0.0	20	12	7	false	0100000011	10.0	5	2	false	0	86684208
15013	9.52573158	0.00504188	0.10497881	0.0	19	12	8	false	1100000011	10.0	4	2	false	0	60802727
15014	8.00403633	0.00858874	0.12493696	0.0	15	12	6	false	1000110100	10.0	6	2	false	0	614697105
15015	7.95963673	0.00584568	0.12563387	0.0	17	12	6	false	1000100101	10.0	6	2	false	0	146338269
15016	9.34006054	0.0093317	0.10706569	0.0	19	12	7	false	1000000011	10.0	5	2	false	0	174468931
15017	9.99394551	0.00720012	0.10006058	0.0	20	12	8	false	0000000011	10.0	4	2	false	0	179709088
15018	7.78203835	0.00388517	0.12850104	0.0	16	12	5	false	0111100100	10.0	7	2	false	0	186877799
15019	8.41170535	0.00277069	0.11888196	0.0	18	12	5	false	0111000110	10.0	7	2	false	0	156517791
15020	8.14530777	0.00171238	0.12277007	0.0	18	12	5	false	0111000101	10.0	7	2	false	0	22320913
15021	7.61654894	0.00193391	0.13129306	0.0	17	12	4	false	0111000100	10.0	8	2	false	0	43390695
15022	7.76992936	0.01006035	0.1287013	0.0	15	12	6	false	1111100100	10.0	6	2	false	0	710557166
15023	8.40766902	0.00834478	0.11893903	0.0	17	12	6	false	1111000110	10.0	6	2	false	0	807678344
15024	8.14530777	0.00558842	0.12277007	0.0	17	12	6	false	1111000101	10.0	6	2	false	0	123709760
15025	7.05146317	0.0128293	0.14181454	0.0	14	12	6	false	1100011100	10.0	6	2	false	0	512786208
15026	7.58425832	0.00455625	0.13185205	0.0	15	12	5	false	1100011010	10.0	7	2	false	0	119282586
15027	7.39858729	0.00722004	0.13516094	0.0	15	12	5	false	1100011001	10.0	7	2	false	0	395069295
15028	7.27749748	0.01206277	0.13740987	0.0	15	12	6	false	0100011100	10.0	6	2	false	0	522236731
15029	7.63673058	0.00427762	0.13094609	0.0	16	12	5	false	0100011010	10.0	7	2	false	0	221628504
15030	7.41069627	0.00721902	0.13494009	0.0	15	12	5	false	0100011001	10.0	7	2	false	0	741264134
15031	7.61654894	0.00603217	0.13129306	0.0	16	12	5	false	1111000100	10.0	7	2	false	0	214298767
15032	7.38244198	0.01288961	0.13545653	0.0	14	12	6	false	1011100100	10.0	6	2	false	0	765959455
15033	8.2542886	0.0154177	0.12114914	0.0	16	12	6	false	1011000110	10.0	6	2	false	0	1483853271
15034	8.08072654	0.01120389	0.12375125	0.0	16	12	6	false	1011000101	10.0	6	2	false	0	285268427
15035	7.92330979	0.00858785	0.12620988	0.0	14	12	6	false	0101101001	10.0	6	2	false	0	74677491
15036	8.68617558	0.00398363	0.11512546	0.0	15	12	7	false	1101101001	10.0	5	2	false	0	18114662
15037	8.03632694	0.00823744	0.12443496	0.0	15	12	7	false	0011100100	10.0	5	2	false	0	398551306
15038	8.90010091	0.00736922	0.11235828	0.0	17	12	7	false	0011000110	10.0	5	2	false	0	583678735
15039	8.77497477	0.00535971	0.11396044	0.0	17	12	7	false	0011000101	10.0	5	2	false	0	139893663
15040	7.00302725	0.01551081	0.14279539	0.0	13	12	6	false	1000011100	10.0	6	2	false	0	996591979
15041	8.03632694	0.00548645	0.12443496	0.0	14	12	6	false	1000011010	10.0	6	2	false	0	127432401
15042	7.86276488	0.00777667	0.12718172	0.0	15	12	6	false	1000011001	10.0	6	2	false	0	299915012
15043	7.58425832	0.00904389	0.13185205	0.0	14	12	6	false	0000011100	10.0	6	2	false	0	538068770
15044	8.629667	0.00421357	0.11587933	0.0	15	12	6	false	0000011010	10.0	6	2	false	0	88233333
15045	8.49041372	0.0054653	0.11777989	0.0	16	12	6	false	0000011001	10.0	6	2	false	0	274686229
15046	6.28456105	0.00682952	0.1591201	0.0	12	12	5	false	1011101000	10.0	7	2	false	0	110732443
15047	6.42986882	0.00354926	0.15552417	0.0	12	12	4	false	1001101001	10.0	8	2	false	0	38386897
15048	6.89808274	0.00773944	0.14496782	0.0	13	12	6	false	0011101000	10.0	6	2	false	0	100359732
15049	7.01917255	0.00924012	0.14246694	0.0	13	12	5	false	0001101001	10.0	7	2	false	0	94164328
15050	9.38849647	0.00461083	0.10651333	0.0	17	12	7	false	0101100100	10.0	5	2	false	0	352644737
15051	10.13723512	0.00378954	0.09864623	0.0	19	12	7	false	0101000110	10.0	5	2	false	0	358490902
15052	9.93743693	0.0028537	0.10062957	0.0	19	12	7	false	0101000101	10.0	5	2	false	0	112345007
15053	9.49142281	0.00413626	0.10535828	0.0	16	12	8	false	1101100100	10.0	4	2	false	0	162482459
15054	10.28456105	0.002946	0.09723312	0.0	18	12	8	false	1101000110	10.0	4	2	false	0	90051642
15055	10.10292634	0.00244039	0.09898122	0.0	18	12	8	false	1101000101	10.0	4	2	false	0	30801012
15056	7.52774975	0.01111076	0.13284182	0.0	15	12	5	false	1011000100	10.0	7	2	false	0	357142843
15057	7.8345106	0.00788792	0.12764039	0.0	15	12	6	false	1001100100	10.0	6	2	false	0	376114464
15058	8.66801211	0.00990528	0.11536671	0.0	17	12	6	false	1001000110	10.0	6	2	false	0	700359278
15059	8.46821393	0.01088793	0.11808866	0.0	17	12	6	false	1001000101	10.0	6	2	false	0	235480950
15060	8.17759839	0.00572923	0.12228529	0.0	16	12	6	false	0011000100	10.0	6	2	false	0	139934636
15061	8.46014127	0.00925574	0.11820134	0.0	16	12	7	false	0001100100	10.0	5	2	false	0	647420613
15062	9.2815338	0.00826006	0.10774081	0.0	18	12	7	false	0001000110	10.0	5	2	false	0	725562404
15063	9.10595358	0.00874704	0.10981826	0.0	18	12	7	false	0001000101	10.0	5	2	false	0	276036787
15064	6.7568113	0.00462784	0.14799881	0.0	16	12	4	false	0110101001	10.0	8	2	false	0	203389093
15065	7.07568113	0.0060322	0.14132915	0.0	17	12	5	false	0110101000	10.0	7	2	false	0	218380033
15066	7.15237134	0.00728651	0.13981377	0.0	17	12	5	false	1110101001	10.0	7	2	false	0	182013720
15067	7.3864783	0.00987304	0.13538251	0.0	17	12	6	false	1110101000	10.0	6	2	false	0	243816183
15068	7.04742684	0.00341167	0.14189576	0.0	16	12	5	false	1010101001	10.0	7	2	false	0	37553788
15069	7.69727548	0.00261661	0.1299161	0.0	17	12	6	false	0010101001	10.0	6	2	false	0	39518870
15070	7.71342079	0.00271991	0.12964417	0.0	15	12	6	false	0111111000	10.0	6	2	false	0	44005387
15071	7.05146317	0.00395505	0.14181454	0.0	15	12	5	false	0111110001	10.0	7	2	false	0	172455473
15072	7.5358224	0.00519553	0.13269952	0.0	15	12	6	false	1111111000	10.0	6	2	false	0	63329002
15073	6.86579213	0.00761049	0.14564962	0.0	14	12	5	false	1111110001	10.0	7	2	false	0	297980391
15074	8.17759839	0.00846386	0.12228529	0.0	19	12	6	false	0110100100	10.0	6	2	false	0	643437275
15075	8.96064581	0.00580521	0.1115991	0.0	21	12	6	false	0110000110	10.0	6	2	false	0	408214261
15076	8.7346115	0.00492531	0.11448706	0.0	21	12	6	false	0110000101	10.0	6	2	false	0	70422058
15077	8.20585267	0.00441839	0.12186424	0.0	20	12	5	false	0110000100	10.0	7	2	false	0	114632170
15078	8.25025227	0.02109835	0.12120841	0.0	18	12	7	false	1110100100	10.0	5	2	false	0	1417878405
15079	9.06962664	0.01254584	0.11025812	0.0	20	12	7	false	1110000110	10.0	5	2	false	0	866999051
15080	8.85570131	0.01004147	0.1129216	0.0	20	12	7	false	1110000101	10.0	5	2	false	0	247251404
15081	7.5358224	0.01776443	0.13269952	0.0	14	12	7	false	1011111000	10.0	5	2	false	0	1188883751
15082	7.20080727	0.01682936	0.13887332	0.0	14	12	6	false	1011110001	10.0	6	2	false	0	552548264
15083	8.12512614	0.00975902	0.12307501	0.0	15	12	7	false	0011111000	10.0	5	2	false	0	542884084
15084	7.79818365	0.01161578	0.12823499	0.0	15	12	6	false	0011110001	10.0	6	2	false	0	396743984
15085	7.03935419	0.00307455	0.14205849	0.0	16	12	5	false	1100101001	10.0	7	2	false	0	81672368
15086	6.53077699	0.00422944	0.15312114	0.0	15	12	4	false	0100101001	10.0	8	2	false	0	206341378
15087	6.84964682	0.00521414	0.14599293	0.0	16	12	5	false	0100101000	10.0	7	2	false	0	189933852
15088	9.37235116	0.00661169	0.10669681	0.0	20	12	8	false	0010100100	10.0	4	2	false	0	240098466
15089	10.2542886	0.00614163	0.09752017	0.0	22	12	8	false	0010000110	10.0	4	2	false	0	296059202
15090	10.21997982	0.00422417	0.09784755	0.0	22	12	8	false	0010000101	10.0	4	2	false	0	62937527
15091	8.32694248	0.00993243	0.1200921	0.0	19	12	6	false	1110000100	10.0	6	2	false	0	263043818
15092	8.67810293	0.01320093	0.11523256	0.0	19	12	7	false	1010100100	10.0	5	2	false	0	662386344
15093	9.55196771	0.01390016	0.10469047	0.0	21	12	7	false	1010000110	10.0	5	2	false	0	868191567
15094	9.44500505	0.00975601	0.10587607	0.0	21	12	7	false	1010000101	10.0	5	2	false	0	225521335
15095	7.25731584	0.00419448	0.13779199	0.0	16	12	6	false	1100101000	10.0	6	2	false	0	91259151
15096	7.45913219	0.00406289	0.13406385	0.0	17	12	6	false	1010101000	10.0	6	2	false	0	70534441
15097	6.7568113	0.00392458	0.14799881	0.0	13	12	5	false	1001101000	10.0	7	2	false	0	54597227
15098	5.92129162	0.0012179	0.16888207	0.0	13	12	3	false	1000101001	10.0	9	2	false	0	4788674
15099	6.24419778	0.00147586	0.16014867	0.0	14	12	4	false	1000101000	10.0	8	2	false	0	30092992
15100	8.11705348	0.00319653	0.12319741	0.0	18	12	7	false	0010101000	10.0	5	2	false	0	63875307
15101	7.34611504	0.01018915	0.13612637	0.0	14	12	6	false	0001101000	10.0	6	2	false	0	125321009
15102	6.47830474	0.0026788	0.15436137	0.0	14	12	4	false	0000101001	10.0	8	2	false	0	122342533
15103	6.8012109	0.00318178	0.14703264	0.0	15	12	5	false	0000101000	10.0	7	2	false	0	103389101
15104	9.56609485	0.00316583	0.10453586	0.0	17	12	8	false	0101111000	10.0	4	2	false	0	109713479
15105	9.17860747	0.00456529	0.10894899	0.0	17	12	7	false	0101110001	10.0	5	2	false	0	210826098
15106	8.9889001	0.00636824	0.11124832	0.0	16	12	8	false	1101111000	10.0	4	2	false	0	151712232
15107	8.59737639	0.00935504	0.11631455	0.0	16	12	7	false	1101110001	10.0	5	2	false	0	189760909
15108	6.67204844	0.00682826	0.14987901	0.0	14	12	5	false	0111101000	10.0	7	2	false	0	188789153
15109	6.19576186	0.00686428	0.16140065	0.0	12	12	5	false	0111001010	10.0	7	2	false	0	1323384233
15110	5.57013118	0.00359819	0.17952899	0.0	11	12	3	false	0111001001	10.0	9	2	false	0	224868493
15111	5.88900101	0.00481203	0.16980809	0.0	11	12	4	false	0111001000	10.0	8	2	false	0	346059601
15112	6.96266398	0.0130121	0.14362319	0.0	14	12	6	false	1111101000	10.0	6	2	false	0	340071193
15113	6.44601413	0.02553421	0.15513463	0.0	12	12	6	false	1111001010	10.0	6	2	false	0	4679535293
15114	5.8284561	0.01412348	0.17157202	0.0	11	12	4	false	1111001001	10.0	8	2	false	0	932075972
15115	9.37436932	0.00278303	0.10667384	0.0	18	12	6	false	0101000100	10.0	6	2	false	0	83464958
15116	7.8950555	0.009691	0.12666155	0.0	18	12	6	false	0100100100	10.0	6	2	false	0	762051521
15117	8.69424823	0.00713138	0.11501857	0.0	20	12	6	false	0100000110	10.0	6	2	false	0	529869429
15118	8.46821393	0.00623351	0.11808866	0.0	20	12	6	false	0100000101	10.0	6	2	false	0	235983788
15119	7.9394551	0.0054353	0.12595323	0.0	19	12	5	false	0100000100	10.0	7	2	false	0	146868472
15120	9.5358224	0.00224015	0.10486772	0.0	17	12	7	false	1101000100	10.0	5	2	false	0	24999026
15121	8.03229062	0.01422207	0.12449749	0.0	17	12	7	false	1100100100	10.0	5	2	false	0	708473308
15122	8.87184662	0.00769696	0.11271611	0.0	19	12	7	false	1100000110	10.0	5	2	false	0	314790371
15123	8.66195762	0.00717364	0.11544734	0.0	19	12	7	false	1100000101	10.0	5	2	false	0	116294461
15124	8.03632694	0.01330189	0.12443496	0.0	15	12	7	false	1001111000	10.0	5	2	false	0	622524488
15125	7.69323915	0.01503648	0.12998426	0.0	15	12	6	false	1001110001	10.0	6	2	false	0	462616172
15126	8.62159435	0.00787698	0.11598783	0.0	16	12	7	false	0001111000	10.0	5	2	false	0	393402792
15127	8.29061554	0.01030883	0.12061831	0.0	16	12	6	false	0001110001	10.0	6	2	false	0	466691982
15128	6.14732593	0.01926947	0.16267236	0.0	11	12	5	false	1111001000	10.0	7	2	false	0	1648730298
15129	7.12411705	0.01801688	0.14036827	0.0	13	12	6	false	1011001010	10.0	6	2	false	0	2661884447
15130	6.26437941	0.01949427	0.15963273	0.0	12	12	4	false	1011001001	10.0	8	2	false	0	1246045509
15131	6.61553986	0.02438419	0.15115924	0.0	12	12	5	false	1011001000	10.0	7	2	false	0	2196305557
15132	7.97981837	0.00374421	0.12531614	0.0	14	12	7	false	0011001010	10.0	5	2	false	0	271543767
15133	6.95862765	0.00474775	0.1437065	0.0	13	12	5	false	0011001001	10.0	7	2	false	0	175585557
15134	7.39051463	0.00596719	0.13530857	0.0	13	12	6	false	0011001000	10.0	6	2	false	0	329037879
15135	8.13319879	0.00628757	0.12295285	0.0	18	12	6	false	1100000100	10.0	6	2	false	0	102073911
15136	8.85166498	0.01028878	0.1129731	0.0	20	12	6	false	1010000100	10.0	6	2	false	0	229598047
15137	7.92734612	0.00702838	0.12614562	0.0	16	12	5	false	1001000100	10.0	7	2	false	0	162306100
15138	7.32996973	0.00759996	0.13642621	0.0	16	12	5	false	1000100100	10.0	7	2	false	0	141922486
15139	8.08072654	0.00900955	0.12375125	0.0	18	12	5	false	1000000110	10.0	7	2	false	0	146365193
15140	7.85469223	0.01007232	0.12731244	0.0	18	12	5	false	1000000101	10.0	7	2	false	0	90088611
15141	7.3259334	0.00645395	0.13650138	0.0	17	12	4	false	1000000100	10.0	8	2	false	0	45887642
15142	9.56004036	0.00461094	0.10460207	0.0	21	12	7	false	0010000100	10.0	5	2	false	0	81019746
15143	8.54288597	0.00629514	0.11705646	0.0	17	12	6	false	0001000100	10.0	6	2	false	0	170636896
15144	7.91927346	0.00737348	0.12627421	0.0	17	12	6	false	0000100100	10.0	6	2	false	0	379030992
15145	8.66195762	0.00740486	0.11544734	0.0	19	12	6	false	0000000110	10.0	6	2	false	0	257260889
15146	8.43592331	0.00831062	0.11854067	0.0	19	12	6	false	0000000101	10.0	6	2	false	0	144298329
15147	7.90716448	0.00528445	0.12646759	0.0	18	12	5	false	0000000100	10.0	7	2	false	0	76555892
15148	8.83350151	0.00510338	0.11320539	0.0	15	12	8	false	1101101000	10.0	4	2	false	0	26056482
15149	8.81937437	0.01302209	0.11338673	0.0	17	12	8	false	1101001010	10.0	4	2	false	0	222706796
15150	8.37941473	0.00798826	0.11934008	0.0	16	12	6	false	1101001001	10.0	6	2	false	0	76656677
15151	8.25025227	0.00972475	0.12120841	0.0	15	12	7	false	0101101000	10.0	5	2	false	0	96820393
15152	8.18970737	0.01163117	0.12210448	0.0	16	12	7	false	0101001010	10.0	5	2	false	0	331465319
15153	7.70938446	0.00704342	0.12971204	0.0	15	12	5	false	0101001001	10.0	7	2	false	0	111009935
15154	7.99596367	0.0065423	0.1250631	0.0	17	12	6	false	0110111000	10.0	6	2	false	0	271002777
15155	7.45105954	0.00926243	0.1342091	0.0	18	12	5	false	0110110001	10.0	7	2	false	0	1224318134
15156	7.89101917	0.00980357	0.12672634	0.0	16	12	6	false	1110111000	10.0	6	2	false	0	264089563
15157	7.34611504	0.01547163	0.13612637	0.0	17	12	5	false	1110110001	10.0	7	2	false	0	1224760723
15158	8.87184662	0.00659552	0.11271611	0.0	18	12	8	false	1001001010	10.0	4	2	false	0	118682280
15159	7.77800202	0.01080291	0.12856772	0.0	16	12	6	false	1001001001	10.0	6	2	false	0	248297115
15160	9.75580222	0.00182714	0.1025031	0.0	19	12	9	false	0001001010	10.0	3	2	false	0	31216451
15161	8.52875883	0.00451918	0.11725035	0.0	17	12	7	false	0001001001	10.0	5	2	false	0	169522340
15162	8.94853683	0.00642154	0.11175011	0.0	16	12	8	false	1010111000	10.0	4	2	false	0	133728325
15163	8.69828456	0.00781557	0.1149652	0.0	18	12	7	false	1010110001	10.0	5	2	false	0	123512868
15164	9.54591322	0.00566191	0.10475687	0.0	17	12	8	false	0010111000	10.0	4	2	false	0	149572944
15165	9.28758829	0.0073325	0.10767058	0.0	19	12	7	false	0010110001	10.0	5	2	false	0	203277568
15166	7.72956609	0.00898476	0.12937337	0.0	15	12	6	false	1100111000	10.0	6	2	false	0	331515950
15167	7.22906155	0.01241421	0.13833054	0.0	16	12	5	false	1100110001	10.0	7	2	false	0	1151316808
15168	7.9394551	0.00664273	0.12595323	0.0	16	12	6	false	0100111000	10.0	6	2	false	0	397712584
15169	7.43491423	0.00851663	0.13450054	0.0	17	12	5	false	0100110001	10.0	7	2	false	0	1527641349
15170	8.8839556	0.00196688	0.11256247	0.0	16	12	7	false	0110001010	10.0	5	2	false	0	50575234
15171	7.71342079	0.00279885	0.12964417	0.0	15	12	5	false	0110001001	10.0	7	2	false	0	61074989
15172	8.26639758	0.00276778	0.12097168	0.0	16	12	6	false	0110001000	10.0	6	2	false	0	51833540
15173	9.29162462	0.00327844	0.10762381	0.0	17	12	8	false	1110001010	10.0	4	2	false	0	86068071
15174	8.12512614	0.00399616	0.12307501	0.0	16	12	6	false	1110001001	10.0	6	2	false	0	81812135
15175	8.51261352	0.00316366	0.11747274	0.0	15	12	6	false	0000111000	10.0	6	2	false	0	141498407
15176	8.14127144	0.00430446	0.12283094	0.0	16	12	5	false	0000110001	10.0	7	2	false	0	239039919
15177	7.93138244	0.0040796	0.12608142	0.0	14	12	6	false	1000111000	10.0	6	2	false	0	155564393
15178	7.55196771	0.00504792	0.13241582	0.0	15	12	5	false	1000110001	10.0	7	2	false	0	176190392
15179	10.16750757	0.00326234	0.09835252	0.0	17	12	8	false	0010001010	10.0	4	2	false	0	93924513
15180	8.54490414	0.00450592	0.11702881	0.0	16	12	6	false	0010001001	10.0	6	2	false	0	116053727
15181	9.29969728	0.0050672	0.10753038	0.0	17	12	7	false	0010001000	10.0	5	2	false	0	165988030
15182	8.67810293	0.00444115	0.11523256	0.0	17	12	7	false	1110001000	10.0	5	2	false	0	84137953
15183	9.43289606	0.00530668	0.10601198	0.0	16	12	7	false	1010001010	10.0	5	2	false	0	140586106
15184	7.90716448	0.00728527	0.12646759	0.0	15	12	5	false	1010001001	10.0	7	2	false	0	169425872
15185	8.62159435	0.00818179	0.11598783	0.0	16	12	6	false	1010001000	10.0	6	2	false	0	195005999
15186	5.50935961	7.0235E-4	0.1815093	0.0	12	12	3	false	1111011000	10.0	9	2	false	0	230709
15187	7.63163163	7.3111E-4	0.13103358	0.0	16	12	5	false	1111010010	10.0	7	2	false	0	1950565
15188	5.09872923	3.5374E-4	0.1961273	0.0	11	12	2	false	1111010001	10.0	10	2	false	0	128320
15189	5.34897361	5.2249E-4	0.18695175	0.0	11	12	3	false	1111010000	10.0	9	2	false	0	132956
15190	5.41477833	7.7595E-4	0.18467977	0.0	12	12	3	false	0111011000	10.0	9	2	false	0	256110
15191	7.73573574	7.3873E-4	0.12927019	0.0	17	12	5	false	0111010010	10.0	7	2	false	0	1961677
15192	5.00488759	3.8376E-4	0.19980469	0.0	10	12	2	false	0111010001	10.0	10	2	false	0	135504
15193	5.25513196	5.5693E-4	0.19029018	0.0	10	12	3	false	0111010000	10.0	9	2	false	0	149185
15194	6.63168517	0.02277116	0.15079124	0.0	13	12	5	false	1011011000	10.0	7	2	false	0	1798435051
15195	9.28355197	0.00591595	0.10771739	0.0	18	12	7	false	1011010010	10.0	5	2	false	0	61474152
15196	6.31281534	0.01314865	0.15840793	0.0	13	12	4	false	1011010001	10.0	8	2	false	0	397701226
15197	6.64379415	0.01575917	0.1505164	0.0	13	12	5	false	1011010000	10.0	7	2	false	0	708246658
15198	7.22906155	0.00933586	0.13833054	0.0	14	12	5	false	0011011000	10.0	7	2	false	0	546110198
15199	9.91321897	0.00328044	0.10087541	0.0	19	12	7	false	0011010010	10.0	5	2	false	0	26178494
15200	6.91019173	0.00804754	0.14471379	0.0	14	12	4	false	0011010001	10.0	8	2	false	0	196678526
15201	7.25731584	0.00900343	0.13779199	0.0	14	12	5	false	0011010000	10.0	7	2	false	0	341160971
15202	8.02825429	0.00761212	0.12456008	0.0	15	12	6	false	0101001000	10.0	6	2	false	0	118595844
15203	8.3592331	0.00467805	0.1196282	0.0	15	12	7	false	0100001010	10.0	5	2	false	0	132314363
15204	7.41876892	0.00506896	0.13479325	0.0	14	12	5	false	0100001001	10.0	7	2	false	0	124784303
15205	7.91120081	0.00500917	0.12640306	0.0	15	12	6	false	0100001000	10.0	6	2	false	0	112199920
15206	8.68617558	0.00898561	0.11512546	0.0	16	12	7	false	1101001000	10.0	5	2	false	0	93409336
15207	8.85973764	0.00520126	0.11287016	0.0	16	12	8	false	1100001010	10.0	4	2	false	0	124478459
15208	7.93541877	0.0050154	0.12601729	0.0	15	12	6	false	1100001001	10.0	6	2	false	0	98234601
15209	9.29566095	0.00263162	0.10757707	0.0	18	12	8	false	0001001000	10.0	4	2	false	0	34166654
15210	9.57416751	0.00239084	0.10444772	0.0	16	12	8	false	0000001010	10.0	4	2	false	0	65109392
15211	8.05449041	0.00543837	0.12415435	0.0	15	12	6	false	0000001001	10.0	6	2	false	0	162883481
15212	8.83551968	0.00322112	0.11317953	0.0	16	12	7	false	0000001000	10.0	5	2	false	0	88222526
15213	8.42785066	0.00531042	0.11865421	0.0	16	12	7	false	1100001000	10.0	5	2	false	0	97484628
15214	8.48032291	0.00811361	0.11792004	0.0	17	12	7	false	1001001000	10.0	5	2	false	0	103018907
15215	8.82744702	0.00459845	0.11328304	0.0	15	12	7	false	1000001010	10.0	5	2	false	0	113876558
15216	7.41069627	0.0085284	0.13494009	0.0	14	12	5	false	1000001001	10.0	7	2	false	0	225916047
15217	8.14530777	0.0057059	0.12277007	0.0	15	12	6	false	1000001000	10.0	6	2	false	0	127118182
15218	7.97981837	0.00425557	0.12531614	0.0	17	12	5	false	1101011000	10.0	7	2	false	0	131241436
15219	9.68718466	0.00253117	0.10322917	0.0	17	12	7	false	1101010010	10.0	5	2	false	0	39869651
15220	7.69323915	0.0030006	0.12998426	0.0	15	12	4	false	1101010001	10.0	8	2	false	0	345565415
15221	7.97578204	0.0045702	0.12537955	0.0	16	12	5	false	0101011000	10.0	7	2	false	0	235489334
15222	9.88092836	0.00243091	0.10120507	0.0	18	12	7	false	0101010010	10.0	5	2	false	0	76997351
15223	7.67507568	0.00271517	0.13029187	0.0	15	12	4	false	0101010001	10.0	8	2	false	0	709998292
15224	8.08072654	0.01218721	0.12375125	0.0	16	12	7	false	1001011000	10.0	5	2	false	0	335851266
15225	10.88193744	0.00218568	0.0918954	0.0	19	12	9	false	1001010010	10.0	3	2	false	0	60596433
15226	8.09283552	0.00895626	0.12356608	0.0	16	12	6	false	1001010001	10.0	6	2	false	0	159288322
15227	8.74066599	0.0064197	0.11440776	0.0	17	12	7	false	0001011000	10.0	5	2	false	0	215367751
15228	11.53178607	0.00150478	0.08671684	0.0	20	12	9	false	0001010010	10.0	3	2	false	0	41981210
15229	8.71442987	0.0067197	0.1147522	0.0	17	12	6	false	0001010001	10.0	6	2	false	0	154313417
15230	7.38244198	0.00668025	0.13545653	0.0	16	12	5	false	1110011000	10.0	7	2	false	0	190719438
15231	9.53784057	0.00227672	0.10484554	0.0	19	12	7	false	1110010010	10.0	5	2	false	0	60880278
15232	6.90211907	0.00937747	0.14488304	0.0	17	12	4	false	1110010001	10.0	8	2	false	0	736951278
15233	7.24924319	0.00761155	0.13794543	0.0	17	12	5	false	1110010000	10.0	7	2	false	0	515384827
15234	7.35015136	0.00563606	0.13605162	0.0	16	12	5	false	0110011000	10.0	7	2	false	0	249750748
15235	9.66700303	0.00173214	0.10344468	0.0	20	12	7	false	0110010010	10.0	5	2	false	0	77229553
15236	6.86982846	0.00673113	0.14556404	0.0	17	12	4	false	0110010001	10.0	8	2	false	0	939221716
15237	7.21695257	0.0055853	0.13856264	0.0	17	12	5	false	0110010000	10.0	7	2	false	0	516587342
15238	7.35418769	0.00521697	0.13597695	0.0	15	12	6	false	0111110000	10.0	6	2	false	0	270548081
15239	7.27547931	0.0045845	0.13744799	0.0	16	12	5	false	0111100001	10.0	7	2	false	0	181523796
15240	7.15237134	0.00971114	0.13981377	0.0	14	12	6	false	1111110000	10.0	6	2	false	0	475011446
15241	7.32189707	0.01093651	0.13657663	0.0	15	12	6	false	1111100001	10.0	6	2	false	0	440857112
15242	8.60141271	0.00949282	0.11625997	0.0	16	12	6	false	0010011000	10.0	6	2	false	0	270597649
15243	11.37840565	0.0042485	0.08788578	0.0	22	12	8	false	0010010010	10.0	4	2	false	0	74412145
15244	8.34308779	0.00971972	0.1198597	0.0	18	12	5	false	0010010001	10.0	7	2	false	0	222763557
15245	8.79112008	0.01090989	0.11375115	0.0	17	12	6	false	0010010000	10.0	6	2	false	0	313744949
15246	8.00403633	0.01215163	0.12493696	0.0	15	12	6	false	1010011000	10.0	6	2	false	0	306361471
15247	10.77295661	0.00458674	0.09282503	0.0	21	12	8	false	1010010010	10.0	4	2	false	0	77487700
15248	7.75378406	0.01123041	0.12896929	0.0	17	12	5	false	1010010001	10.0	7	2	false	0	175443536
15249	8.19374369	0.0125375	0.12204433	0.0	16	12	6	false	1010010000	10.0	6	2	false	0	259962840
15250	7.50756811	0.02568707	0.13319892	0.0	14	12	7	false	1011110000	10.0	5	2	false	0	1365810181
15251	6.78102926	0.00862873	0.14747024	0.0	14	12	5	false	1011100001	10.0	7	2	false	0	296068314
15252	8.12108981	0.01802953	0.12313618	0.0	15	12	7	false	0011110000	10.0	5	2	false	0	939056788
15253	7.40262361	0.00773672	0.13508724	0.0	15	12	6	false	0011100001	10.0	6	2	false	0	160102908
15254	7.93541877	0.00265325	0.12601729	0.0	15	12	5	false	0101010000	10.0	7	2	false	0	242022028
15255	7.3259334	0.00969866	0.13650138	0.0	15	12	5	false	0100011000	10.0	7	2	false	0	582077144
15256	9.40060545	0.00316251	0.10637613	0.0	19	12	7	false	0100010010	10.0	5	2	false	0	172575119
15257	6.93440969	0.00896515	0.14420838	0.0	16	12	4	false	0100010001	10.0	8	2	false	0	2058333279
15258	7.2653885	0.00886375	0.13763889	0.0	16	12	5	false	0100010000	10.0	7	2	false	0	942826903
15259	7.9556004	0.00279019	0.12569762	0.0	15	12	5	false	1101010000	10.0	7	2	false	0	145032017
15260	7.27749748	0.01032113	0.13740987	0.0	15	12	5	false	1100011000	10.0	7	2	false	0	372103472
15261	9.26337033	0.00367796	0.10795207	0.0	18	12	7	false	1100010010	10.0	5	2	false	0	98810028
15262	6.91019173	0.01105981	0.14471379	0.0	16	12	4	false	1100010001	10.0	8	2	false	0	1217000964
15263	7.2815338	0.01070891	0.1373337	0.0	16	12	5	false	1100010000	10.0	7	2	false	0	708158185
15264	9.48940464	0.00576665	0.10538069	0.0	17	12	8	false	0101110000	10.0	4	2	false	0	329331381
15265	8.81533804	0.00736867	0.11343864	0.0	17	12	7	false	0101100001	10.0	5	2	false	0	165762791
15266	8.89202825	0.01135493	0.11246028	0.0	16	12	8	false	1101110000	10.0	4	2	false	0	380527816
15267	9.00100908	0.00620099	0.11109865	0.0	16	12	8	false	1101100001	10.0	4	2	false	0	57617563
15268	9.08779011	0.00412092	0.11003775	0.0	18	12	7	false	0001010000	10.0	5	2	false	0	82067033
15269	8.15741675	0.008424	0.12258783	0.0	15	12	6	false	0000011000	10.0	6	2	false	0	319590514
15270	10.84561049	0.00275553	0.0922032	0.0	21	12	8	false	0000010010	10.0	4	2	false	0	138005378
15271	7.90716448	0.0089809	0.12646759	0.0	17	12	5	false	0000010001	10.0	7	2	false	0	220977902
15272	8.37134208	0.00607173	0.11945516	0.0	16	12	6	false	0000010000	10.0	6	2	false	0	184307817
15273	8.44803229	0.00619303	0.11837076	0.0	17	12	7	false	1001010000	10.0	5	2	false	0	103558941
15274	7.56004036	0.01176743	0.13227443	0.0	14	12	6	false	1000011000	10.0	6	2	false	0	403520538
15275	10.24016145	0.00319776	0.09765471	0.0	20	12	8	false	1000010010	10.0	4	2	false	0	65792861
15276	7.31786075	0.01044871	0.13665196	0.0	16	12	5	false	1000010001	10.0	7	2	false	0	188730591
15277	7.77396569	0.0074386	0.12863448	0.0	15	12	6	false	1000010000	10.0	6	2	false	0	175672719
15278	7.03935419	0.01303684	0.14205849	0.0	14	12	6	false	1011100000	10.0	6	2	false	0	665146382
15279	7.98789102	0.01988496	0.12518949	0.0	15	12	7	false	1001110000	10.0	5	2	false	0	1014133307
15280	7.27749748	0.0045781	0.13740987	0.0	15	12	5	false	1001100001	10.0	7	2	false	0	118637021
15281	7.68113017	0.01041415	0.13018917	0.0	15	12	7	false	0011100000	10.0	5	2	false	0	363032627
15282	8.60141271	0.01402808	0.11625997	0.0	16	12	7	false	0001110000	10.0	5	2	false	0	878477445
15283	7.88698285	0.0094639	0.1267912	0.0	16	12	6	false	0001100001	10.0	6	2	false	0	234252241
15284	7.74974773	0.01359306	0.12903646	0.0	18	12	6	false	0110110000	10.0	6	2	false	0	1320967018
15285	7.67709384	0.00556738	0.13025762	0.0	19	12	5	false	0110100001	10.0	7	2	false	0	498837315
15286	7.95963673	0.00838484	0.12563387	0.0	19	12	6	false	0110100000	10.0	6	2	false	0	692051184
15287	7.64480323	0.02225436	0.13080781	0.0	17	12	6	false	1110110000	10.0	6	2	false	0	1739533077
15288	7.79818365	0.01248829	0.12823499	0.0	18	12	6	false	1110100001	10.0	6	2	false	0	762205274
15289	8.08072654	0.01923619	0.12375125	0.0	18	12	7	false	1110100000	10.0	5	2	false	0	1480949039
15290	9.12613522	0.01478071	0.10957541	0.0	17	12	8	false	1010110000	10.0	4	2	false	0	306023286
15291	7.87487386	0.00626738	0.12698616	0.0	18	12	6	false	1010100001	10.0	6	2	false	0	200335096
15292	9.7235116	0.014153	0.1028435	0.0	18	12	8	false	0010110000	10.0	4	2	false	0	448330161
15293	8.51664985	0.00391866	0.11741706	0.0	19	12	7	false	0010100001	10.0	5	2	false	0	69110815
15294	7.51967709	0.02109659	0.13298443	0.0	16	12	6	false	1100110000	10.0	6	2	false	0	1494503315
15295	7.58829465	0.00618003	0.13178191	0.0	17	12	6	false	1100100001	10.0	6	2	false	0	381179530
15296	7.72149344	0.01465079	0.12950863	0.0	17	12	6	false	0100110000	10.0	6	2	false	0	1526654106
15297	7.39455096	0.0050727	0.13523472	0.0	18	12	5	false	0100100001	10.0	7	2	false	0	500111727
15298	7.66094854	0.00851658	0.13053214	0.0	18	12	6	false	0100100000	10.0	6	2	false	0	643754352
15299	8.84964682	0.00671593	0.11299886	0.0	19	12	8	false	0010100000	10.0	4	2	false	0	190193985
15300	8.16347124	0.01144325	0.12249691	0.0	16	12	7	false	0001100000	10.0	5	2	false	0	460137225
15301	8.5247225	0.00754542	0.11730587	0.0	16	12	6	false	0000110000	10.0	6	2	false	0	363817138
15302	7.41473259	0.00326903	0.13486663	0.0	17	12	5	false	0000100001	10.0	7	2	false	0	146604140
15303	7.70131181	0.00559147	0.12984801	0.0	17	12	6	false	0000100000	10.0	6	2	false	0	218401749
15304	7.85469223	0.01144343	0.12731244	0.0	17	12	7	false	1100100000	10.0	5	2	false	0	664428158
15305	8.18567104	0.01091444	0.12216469	0.0	18	12	7	false	1010100000	10.0	5	2	false	0	517462446
15306	7.5358224	0.00689643	0.13269952	0.0	15	12	6	false	1001100000	10.0	6	2	false	0	265572956
15307	7.92734612	0.00842472	0.12614562	0.0	15	12	6	false	1000110000	10.0	6	2	false	0	321128209
15308	6.82542886	0.00236882	0.14651094	0.0	16	12	4	false	1000100001	10.0	8	2	false	0	30659960
15309	7.10393542	0.00487828	0.14076705	0.0	16	12	5	false	1000100000	10.0	7	2	false	0	84771472
15310	7.55196771	0.00553584	0.13241582	0.0	16	12	6	false	0111100000	10.0	6	2	false	0	278564361
15311	8.39556004	0.00308009	0.11911058	0.0	18	12	6	false	0111000010	10.0	6	2	false	0	120909825
15312	7.4752775	0.0018303	0.1337743	0.0	17	12	4	false	0111000001	10.0	8	2	false	0	21219013
15313	7.72552977	0.00210137	0.12944096	0.0	17	12	5	false	0111000000	10.0	7	2	false	0	37859862
15314	7.61251261	0.01351051	0.13136267	0.0	15	12	7	false	1111100000	10.0	5	2	false	0	833909568
15315	8.40363269	0.01101561	0.11899616	0.0	17	12	7	false	1111000010	10.0	5	2	false	0	456259774
15316	7.4752775	0.00716698	0.1337743	0.0	16	12	5	false	1111000001	10.0	7	2	false	0	92280502
15317	7.72552977	0.00855614	0.12944096	0.0	16	12	6	false	1111000000	10.0	6	2	false	0	156111753
15318	8.96064581	0.00966695	0.1115991	0.0	17	12	7	false	1011000010	10.0	5	2	false	0	263986475
15319	7.73360242	0.00948976	0.12930585	0.0	16	12	5	false	1011000001	10.0	7	2	false	0	96657343
15320	8.18567104	0.01107105	0.12216469	0.0	16	12	6	false	1011000000	10.0	6	2	false	0	139479313
15321	9.78405651	0.00287227	0.1022071	0.0	18	12	8	false	0011000010	10.0	4	2	false	0	46963669
15322	8.419778	0.00416451	0.11876798	0.0	17	12	6	false	0011000001	10.0	6	2	false	0	25677033
15323	8.96064581	0.00398964	0.1115991	0.0	17	12	7	false	0011000000	10.0	5	2	false	0	34686670
15324	9.09182644	0.00815634	0.1099889	0.0	17	12	8	false	0101100000	10.0	4	2	false	0	255337419
15325	10.12108981	0.00613523	0.09880359	0.0	19	12	8	false	0101000010	10.0	4	2	false	0	144475376
15326	9.27144299	0.0038801	0.10785808	0.0	18	12	6	false	0101000001	10.0	6	2	false	0	32043439
15327	9.28758829	0.00712739	0.10767058	0.0	16	12	9	false	1101100000	10.0	3	2	false	0	105654863
15328	10.28052472	0.00751817	0.0972713	0.0	18	12	9	false	1101000010	10.0	3	2	false	0	78956666
15329	9.42078708	0.0052157	0.10614824	0.0	17	12	7	false	1101000001	10.0	5	2	false	0	15687924
15330	11.35015136	0.00166216	0.08810455	0.0	19	12	10	false	0001000010	10.0	2	2	false	0	92101404
15331	9.78203835	0.00511941	0.10222818	0.0	18	12	8	false	0001000001	10.0	4	2	false	0	87885386
15332	10.4863774	0.00413365	0.09536182	0.0	18	12	9	false	1001000010	10.0	3	2	false	0	82930745
15333	9.04540868	0.00734581	0.11055332	0.0	17	12	7	false	1001000001	10.0	5	2	false	0	80068517
15334	10.40565086	0.00164557	0.09610163	0.0	21	12	8	false	0110000010	10.0	4	2	false	0	17364427
15335	8.96064581	0.00337111	0.1115991	0.0	20	12	6	false	0110000001	10.0	6	2	false	0	30834110
15336	9.59838547	0.00215142	0.10418419	0.0	20	12	7	false	0110000000	10.0	5	2	false	0	20425593
15337	10.46215943	0.00272258	0.09558256	0.0	20	12	9	false	1110000010	10.0	3	2	false	0	34001231
15338	9.04944501	0.00497457	0.11050401	0.0	19	12	7	false	1110000001	10.0	5	2	false	0	54520104
15339	11.370333	0.00291091	0.08794817	0.0	21	12	9	false	0010000010	10.0	3	2	false	0	69612163
15340	9.67103935	0.00527829	0.1034015	0.0	20	12	7	false	0010000001	10.0	5	2	false	0	51166688
15341	10.46619576	0.00397516	0.0955457	0.0	20	12	8	false	0010000000	10.0	4	2	false	0	43756916
15342	9.65489405	0.00340827	0.10357441	0.0	19	12	8	false	1110000000	10.0	4	2	false	0	31544166
15343	10.66801211	0.00436991	0.09373818	0.0	20	12	8	false	1010000010	10.0	4	2	false	0	81510986
15344	9.03733602	0.00740817	0.11065208	0.0	19	12	6	false	1010000001	10.0	6	2	false	0	81717826
15345	9.78809284	0.00562174	0.10216495	0.0	19	12	7	false	1010000000	10.0	5	2	false	0	52713039
15346	9.67507568	0.00552719	0.10335836	0.0	17	12	8	false	1101000000	10.0	4	2	false	0	18988801
15347	10.06256307	0.00359919	0.09937826	0.0	19	12	9	false	1100000010	10.0	3	2	false	0	42312915
15348	8.79919273	0.00526456	0.11364679	0.0	18	12	7	false	1100000001	10.0	5	2	false	0	40988258
15349	9.52371342	0.00377352	0.10500106	0.0	18	12	7	false	0101000000	10.0	5	2	false	0	32968602
15350	9.92936428	0.00304821	0.10071138	0.0	20	12	8	false	0100000010	10.0	4	2	false	0	59894492
15351	8.63773966	0.00473108	0.11577103	0.0	19	12	6	false	0100000001	10.0	6	2	false	0	43269683
15352	9.20282543	0.00336839	0.10866228	0.0	19	12	7	false	0100000000	10.0	5	2	false	0	32810886
15353	9.33198789	0.00394262	0.1071583	0.0	18	12	8	false	1100000000	10.0	4	2	false	0	27219548
15354	9.71543895	0.00428364	0.10292896	0.0	17	12	8	false	1001000000	10.0	4	2	false	0	22509382
15355	10.11907164	0.00385568	0.09882329	0.0	19	12	8	false	1000000010	10.0	4	2	false	0	61261465
15356	8.50454087	0.00892298	0.11758424	0.0	18	12	6	false	1000000001	10.0	6	2	false	0	80821052
15357	9.27144299	0.00412624	0.10785808	0.0	18	12	7	false	1000000000	10.0	5	2	false	0	32576801
15358	10.53884965	0.00206577	0.09488702	0.0	18	12	9	false	0001000000	10.0	3	2	false	0	24131464
15359	10.82139253	0.00251525	0.09240955	0.0	20	12	9	false	0000000010	10.0	3	2	false	0	54759473
15360	9.1382442	0.00719232	0.10943021	0.0	19	12	7	false	0000000001	10.0	5	2	false	0	77652555
15361	9.94954591	0.00292705	0.1005071	0.0	19	12	8	false	0000000000	10.0	4	2	false	0	30664186
