# Supplementary material
Source: publisher figshare collection journal article supplement (https://springernature.figshare.com/ndownloader/files/17562821)
Supplement: Supplementary file 1 [file 17562821 › CytoscapeSession-2018_09_25-21_15/tables/21506-STG%2C+Model+3/LOCAL_ATTRS-org.cytoscape.model.CyNode-STG%2C+Model+3+root+default++node.cytable]

"CyCSV-Version","1"
"SUID","name","selected"
"java.lang.Long","java.lang.String","java.lang.Boolean"
"","",""
"STG, Model 3 root default  node",""
