# Supplementary material
Source: publisher figshare collection journal article supplement (https://springernature.figshare.com/ndownloader/files/17562821)
Supplement: Supplementary file 1 [file 17562821 › CytoscapeSession-2018_09_25-21_15/tables/21506-STG%2C+Model+3/SHARED_ATTRS-org.cytoscape.model.CyEdge-STG%2C+Model+3+root+shared++edge.cytable]

CyCSV-Version	1
SUID	shared interaction	shared name
java.lang.Long	java.lang.String	java.lang.String
STG, Model 3 root shared edge
26651	1	0000000000 (1) 0000000010
26650	1	0000000000 (1) 0001000000
26647	1	1000000000 (1) 1000000010
26646	1	1000000000 (1) 1001000000
26645	1	1000000000 (1) 1100000000
26640	1	1100000000 (1) 1100000010
26639	1	1100000000 (1) 1101000000
26635	1	0100000000 (1) 0100000010
26634	1	0100000000 (1) 0101000000
26633	1	0100000000 (1) 0000000000
26627	1	1010000000 (1) 1010000010
26626	1	1010000000 (1) 1000000000
26625	1	1010000000 (1) 1110000000
26620	1	0010000000 (1) 0010000010
26619	1	0010000000 (1) 0000000000
26622	1	1110000000 (1) 1110000010
26621	1	1110000000 (1) 1100000000
26616	1	0110000000 (1) 0110000010
26615	1	0110000000 (1) 0100000000
26614	1	0110000000 (1) 0010000000
26648	1	0001000000 (1) 0001000010
26642	1	1001000000 (1) 1001000010
26641	1	1001000000 (1) 1101000000
26637	1	1101000000 (1) 1101000010
26636	1	1101000000 (1) 1101100000
26630	1	0101000000 (1) 0101000010
26629	1	0101000000 (1) 0101100000
26628	1	0101000000 (1) 0001000000
26602	1	1011000000 (1) 1011000010
26601	1	1011000000 (1) 1010000000
26600	1	1011000000 (1) 1001000000
26599	1	1011000000 (1) 1111000000
26591	1	0011000000 (1) 0011000010
26590	1	0011000000 (1) 0010000000
26589	1	0011000000 (1) 0001000000
26595	1	1111000000 (1) 1111000010
26594	1	1111000000 (1) 1111100000
26593	1	1111000000 (1) 1110000000
26592	1	1111000000 (1) 1101000000
26581	1	0111000000 (1) 0111000010
26580	1	0111000000 (1) 0111100000
26579	1	0111000000 (1) 0110000000
26578	1	0111000000 (1) 0101000000
26577	1	0111000000 (1) 0011000000
26569	1	1000100000 (1) 1000110000
26568	1	1000100000 (1) 1000000000
26567	1	1000100000 (1) 1001100000
26566	1	1000100000 (1) 1010100000
26565	1	1000100000 (1) 1100100000
26549	1	0000100000 (1) 0000110000
26548	1	0000100000 (1) 0000000000
26547	1	0000100000 (1) 0001100000
26546	1	0000100000 (1) 0010100000
26553	1	1100100000 (1) 1100110000
26552	1	1100100000 (1) 1100000000
26551	1	1100100000 (1) 1101100000
26550	1	1100100000 (1) 1110100000
26529	1	0100100000 (1) 0100110000
26528	1	0100100000 (1) 0100000000
26527	1	0100100000 (1) 0101100000
26526	1	0100100000 (1) 0110100000
26525	1	0100100000 (1) 0000100000
26556	1	1010100000 (1) 1010110000
26555	1	1010100000 (1) 1010000000
26554	1	1010100000 (1) 1110100000
26538	1	0010100000 (1) 0010110000
26537	1	0010100000 (1) 0010000000
26531	1	1110100000 (1) 1110110000
26530	1	1110100000 (1) 1110000000
26519	1	0110100000 (1) 0110110000
26518	1	0110100000 (1) 0110000000
26517	1	0110100000 (1) 0010100000
26560	1	1001100000 (1) 1001110000
26559	1	1001100000 (1) 1001000000
26558	1	1001100000 (1) 1011100000
26557	1	1001100000 (1) 1101100000
26499	1	1000010000 (1) 1000010010
26498	1	1000010000 (1) 1000011000
26497	1	1000010000 (1) 1000000000
26496	1	1000010000 (1) 1001010000
26541	1	0001100000 (1) 0001110000
26540	1	0001100000 (1) 0001000000
26539	1	0001100000 (1) 0011100000
26480	1	0000010000 (1) 0000010010
26479	1	0000010000 (1) 0000011000
26478	1	0000010000 (1) 0000000000
26477	1	0000010000 (1) 0001010000
26609	1	1101100000 (1) 1101110000
26608	1	1101100000 (1) 1111100000
26464	1	1100010000 (1) 1100010010
26463	1	1100010000 (1) 1100011000
26462	1	1100010000 (1) 1100000000
26461	1	1100010000 (1) 1101010000
26460	1	1100010000 (1) 1000010000
26605	1	0101100000 (1) 0101110000
26604	1	0101100000 (1) 0111100000
26603	1	0101100000 (1) 0001100000
26443	1	0100010000 (1) 0100010010
26442	1	0100010000 (1) 0100011000
26441	1	0100010000 (1) 0100000000
26440	1	0100010000 (1) 0101010000
26439	1	0100010000 (1) 0000010000
26503	1	1011100000 (1) 1011110000
26502	1	1011100000 (1) 1011000000
26501	1	1011100000 (1) 1010100000
26500	1	1011100000 (1) 1111100000
26422	1	1010010000 (1) 1010010010
26421	1	1010010000 (1) 1010011000
26420	1	1010010000 (1) 1010000000
26419	1	1010010000 (1) 1000010000
26483	1	0011100000 (1) 0011110000
26482	1	0011100000 (1) 0011000000
26481	1	0011100000 (1) 0010100000
26409	1	0010010000 (1) 0010010010
26408	1	0010010000 (1) 0010011000
26407	1	0010010000 (1) 0010000000
26406	1	0010010000 (1) 0000010000
26583	1	1111100000 (1) 1111110000
26582	1	1111100000 (1) 1110100000
26396	1	1110010000 (1) 1110010010
26395	1	1110010000 (1) 1110011000
26394	1	1110010000 (1) 1110000000
26393	1	1110010000 (1) 1100010000
26392	1	1110010000 (1) 1010010000
26572	1	0111100000 (1) 0111110000
26571	1	0111100000 (1) 0110100000
26570	1	0111100000 (1) 0011100000
26380	1	0110010000 (1) 0110010010
26379	1	0110010000 (1) 0110011000
26378	1	0110010000 (1) 0110000000
26377	1	0110010000 (1) 0100010000
26376	1	0110010000 (1) 0010010000
26489	1	1001010000 (1) 1001010010
26488	1	1001010000 (1) 1001011000
26487	1	1001010000 (1) 1001000000
26470	1	0001010000 (1) 0001010010
26469	1	0001010000 (1) 0001011000
26468	1	0001010000 (1) 0001000000
26451	1	1101010000 (1) 1101010010
26450	1	1101010000 (1) 1101011000
26449	1	1101010000 (1) 1101000000
26448	1	1101010000 (1) 1101110000
26447	1	1101010000 (1) 1001010000
26430	1	0101010000 (1) 0101010010
26429	1	0101010000 (1) 0101011000
26428	1	0101010000 (1) 0101000000
26427	1	0101010000 (1) 0101110000
26426	1	0101010000 (1) 0001010000
26343	1	1000001000 (1) 1000001010
26342	1	1000001000 (1) 1000000000
26341	1	1000001000 (1) 1001001000
26340	1	1000001000 (1) 1100001000
26330	1	0000001000 (1) 0000001010
26329	1	0000001000 (1) 0000000000
26328	1	0000001000 (1) 0001001000
26333	1	1100001000 (1) 1100001010
26332	1	1100001000 (1) 1100000000
26331	1	1100001000 (1) 1101001000
26318	1	0100001000 (1) 0100001010
26317	1	0100001000 (1) 0100000000
26316	1	0100001000 (1) 0101001000
26315	1	0100001000 (1) 0000001000
26307	1	1011010000 (1) 1011010010
26306	1	1011010000 (1) 1011011000
26305	1	1011010000 (1) 1011000000
26304	1	1011010000 (1) 1010010000
26303	1	1011010000 (1) 1001010000
26294	1	0011010000 (1) 0011010010
26293	1	0011010000 (1) 0011011000
26292	1	0011010000 (1) 0011000000
26291	1	0011010000 (1) 0010010000
26290	1	0011010000 (1) 0001010000
26281	1	0111010000 (1) 0111010010
26280	1	0111010000 (1) 0111011000
26279	1	0111010000 (1) 0111000000
26278	1	0111010000 (1) 0111110000
26277	1	0111010000 (1) 0110010000
26276	1	0111010000 (1) 0101010000
26275	1	0111010000 (1) 0011010000
26262	1	1111010000 (1) 1111010010
26261	1	1111010000 (1) 1111011000
26260	1	1111010000 (1) 1111000000
26259	1	1111010000 (1) 1111110000
26258	1	1111010000 (1) 1110010000
26257	1	1111010000 (1) 1101010000
26256	1	1111010000 (1) 1011010000
26243	1	1010001000 (1) 1010001010
26242	1	1010001000 (1) 1010000000
26241	1	1010001000 (1) 1000001000
26240	1	1010001000 (1) 1110001000
26233	1	0010001000 (1) 0010001010
26232	1	0010001000 (1) 0010000000
26231	1	0010001000 (1) 0000001000
26236	1	1110001000 (1) 1110001010
26235	1	1110001000 (1) 1110000000
26234	1	1110001000 (1) 1100001000
26564	1	1000110000 (1) 1000111000
26563	1	1000110000 (1) 1000010000
26562	1	1000110000 (1) 1001110000
26561	1	1000110000 (1) 1010110000
26545	1	0000110000 (1) 0000111000
26544	1	0000110000 (1) 0000010000
26543	1	0000110000 (1) 0001110000
26542	1	0000110000 (1) 0010110000
26218	1	0110001000 (1) 0110001010
26217	1	0110001000 (1) 0110000000
26216	1	0110001000 (1) 0100001000
26215	1	0110001000 (1) 0010001000
26536	1	1100110000 (1) 1100111000
26535	1	1100110000 (1) 1100010000
26534	1	1100110000 (1) 1101110000
26533	1	1100110000 (1) 1110110000
26532	1	1100110000 (1) 1000110000
26524	1	0100110000 (1) 0100111000
26523	1	0100110000 (1) 0100010000
26522	1	0100110000 (1) 0101110000
26521	1	0100110000 (1) 0110110000
26520	1	0100110000 (1) 0000110000
26516	1	1010110000 (1) 1010111000
26515	1	1010110000 (1) 1010010000
26336	1	1001001000 (1) 1001001010
26335	1	1001001000 (1) 1001000000
26334	1	1001001000 (1) 1101001000
26514	1	0010110000 (1) 0010111000
26513	1	0010110000 (1) 0010010000
26325	1	0001001000 (1) 0001001010
26324	1	0001001000 (1) 0001000000
26512	1	1110110000 (1) 1110111000
26511	1	1110110000 (1) 1110010000
26510	1	1110110000 (1) 1010110000
26321	1	1101001000 (1) 1101001010
26320	1	1101001000 (1) 1101000000
26319	1	1101001000 (1) 1101101000
26509	1	0110110000 (1) 0110111000
26508	1	0110110000 (1) 0110010000
26507	1	0110110000 (1) 0010110000
26311	1	0101001000 (1) 0101001010
26310	1	0101001000 (1) 0101000000
26309	1	0101001000 (1) 0101101000
26308	1	0101001000 (1) 0001001000
26176	1	1011001000 (1) 1011001010
26175	1	1011001000 (1) 1011000000
26174	1	1011001000 (1) 1010001000
26173	1	1011001000 (1) 1001001000
26172	1	1011001000 (1) 1111001000
26162	1	1000000100 (1) 1000000110
26161	1	1000000100 (1) 1000000000
26160	1	1000000100 (1) 1000100100
26159	1	1000000100 (1) 1001000100
26158	1	1000000100 (1) 1010000100
26157	1	1000000100 (1) 1100000100
26133	1	0011001000 (1) 0011001010
26132	1	0011001000 (1) 0011000000
26131	1	0011001000 (1) 0010001000
26130	1	0011001000 (1) 0001001000
26126	1	0000000100 (1) 0000000110
26125	1	0000000100 (1) 0000000000
26124	1	0000000100 (1) 0000100100
26123	1	0000000100 (1) 0001000100
26122	1	0000000100 (1) 0010000100
26137	1	1100000100 (1) 1100000110
26136	1	1100000100 (1) 1100000000
26135	1	1100000100 (1) 1100100100
26134	1	1100000100 (1) 1101000100
26506	1	1001110000 (1) 1001111000
26505	1	1001110000 (1) 1001010000
26504	1	1001110000 (1) 1011110000
26167	1	1111001000 (1) 1111001010
26166	1	1111001000 (1) 1111000000
26165	1	1111001000 (1) 1111101000
26164	1	1111001000 (1) 1110001000
26163	1	1111001000 (1) 1101001000
26486	1	0001110000 (1) 0001111000
26485	1	0001110000 (1) 0001010000
26484	1	0001110000 (1) 0011110000
26083	1	0100000100 (1) 0100000110
26082	1	0100000100 (1) 0100000000
26081	1	0100000100 (1) 0100100100
26080	1	0100000100 (1) 0101000100
26079	1	0100000100 (1) 0000000100
26065	1	0111001000 (1) 0111001010
26064	1	0111001000 (1) 0111000000
26063	1	0111001000 (1) 0111101000
26062	1	0111001000 (1) 0110001000
26061	1	0111001000 (1) 0101001000
26060	1	0111001000 (1) 0011001000
26467	1	1101110000 (1) 1101111000
26466	1	1101110000 (1) 1111110000
26465	1	1101110000 (1) 1001110000
26446	1	0101110000 (1) 0101111000
26445	1	0101110000 (1) 0111110000
26444	1	0101110000 (1) 0001110000
26044	1	0000101000 (1) 0000100000
26043	1	0000101000 (1) 0000111000
26042	1	0000101000 (1) 0000001000
26041	1	0000101000 (1) 0001101000
26040	1	0000101000 (1) 0010101000
26032	1	1000101000 (1) 1000100000
26031	1	1000101000 (1) 1000111000
26030	1	1000101000 (1) 1000001000
26029	1	1000101000 (1) 1001101000
26028	1	1000101000 (1) 1010101000
26027	1	1000101000 (1) 1100101000
26141	1	1010000100 (1) 1010000110
26140	1	1010000100 (1) 1010000000
26139	1	1010000100 (1) 1010100100
26138	1	1010000100 (1) 1110000100
26109	1	0010000100 (1) 0010000110
26108	1	0010000100 (1) 0010000000
26107	1	0010000100 (1) 0010100100
26017	1	1100101000 (1) 1100100000
26016	1	1100101000 (1) 1100111000
26015	1	1100101000 (1) 1100001000
26014	1	1100101000 (1) 1101101000
26013	1	1100101000 (1) 1110101000
25995	1	0100101000 (1) 0100100000
25994	1	0100101000 (1) 0100111000
25993	1	0100101000 (1) 0100001000
25992	1	0100101000 (1) 0101101000
25991	1	0100101000 (1) 0110101000
25990	1	0100101000 (1) 0000101000
26006	1	1110000100 (1) 1110000110
26005	1	1110000100 (1) 1110000000
26004	1	1110000100 (1) 1110100100
26003	1	1110000100 (1) 1100000100
26425	1	1011110000 (1) 1011111000
26424	1	1011110000 (1) 1011010000
26423	1	1011110000 (1) 1010110000
26412	1	0011110000 (1) 0011111000
26411	1	0011110000 (1) 0011010000
26410	1	0011110000 (1) 0010110000
25974	1	0110000100 (1) 0110000110
25973	1	0110000100 (1) 0110000000
25972	1	0110000100 (1) 0110100100
25971	1	0110000100 (1) 0100000100
25970	1	0110000100 (1) 0010000100
26399	1	1111110000 (1) 1111111000
26398	1	1111110000 (1) 1110110000
26397	1	1111110000 (1) 1011110000
26383	1	0111110000 (1) 0111111000
26382	1	0111110000 (1) 0110110000
26381	1	0111110000 (1) 0011110000
26035	1	0010101000 (1) 0010100000
26034	1	0010101000 (1) 0010111000
26033	1	0010101000 (1) 0010001000
26021	1	1010101000 (1) 1010100000
26020	1	1010101000 (1) 1010111000
26019	1	1010101000 (1) 1010001000
26018	1	1010101000 (1) 1110101000
25998	1	1110101000 (1) 1110100000
25997	1	1110101000 (1) 1110111000
25996	1	1110101000 (1) 1110001000
25989	1	0110101000 (1) 0110100000
25988	1	0110101000 (1) 0110111000
25987	1	0110101000 (1) 0110001000
25986	1	0110101000 (1) 0010101000
26146	1	1001000100 (1) 1001000110
26145	1	1001000100 (1) 1001000000
26144	1	1001000100 (1) 1001100100
26143	1	1001000100 (1) 1011000100
26142	1	1001000100 (1) 1101000100
26113	1	0001000100 (1) 0001000110
26112	1	0001000100 (1) 0001000000
26111	1	0001000100 (1) 0001100100
26110	1	0001000100 (1) 0011000100
26099	1	1101000100 (1) 1101000110
26098	1	1101000100 (1) 1101000000
26097	1	1101000100 (1) 1101100100
26069	1	0101000100 (1) 0101000110
26068	1	0101000100 (1) 0101000000
26067	1	0101000100 (1) 0101100100
26066	1	0101000100 (1) 0001000100
26493	1	1000011000 (1) 1000011010
26492	1	1000011000 (1) 1000011100
26491	1	1000011000 (1) 1000001000
26490	1	1000011000 (1) 1001011000
26474	1	0000011000 (1) 0000011010
26473	1	0000011000 (1) 0000011100
26472	1	0000011000 (1) 0000001000
26471	1	0000011000 (1) 0001011000
26039	1	0001101000 (1) 0001100000
26038	1	0001101000 (1) 0001111000
26037	1	0001101000 (1) 0001001000
26036	1	0001101000 (1) 0011101000
26026	1	1001101000 (1) 1001100000
26025	1	1001101000 (1) 1001111000
26024	1	1001101000 (1) 1001001000
26023	1	1001101000 (1) 1011101000
26022	1	1001101000 (1) 1101101000
26189	1	1101101000 (1) 1101100000
26188	1	1101101000 (1) 1101111000
26187	1	1101101000 (1) 1111101000
26456	1	1100011000 (1) 1100011010
26455	1	1100011000 (1) 1100011100
26454	1	1100011000 (1) 1100001000
26453	1	1100011000 (1) 1101011000
26452	1	1100011000 (1) 1000011000
25948	1	1011000100 (1) 1011000110
25947	1	1011000100 (1) 1011000000
25946	1	1011000100 (1) 1011100100
25945	1	1011000100 (1) 1010000100
25944	1	1011000100 (1) 1111000100
26180	1	0101101000 (1) 0101100000
26179	1	0101101000 (1) 0101111000
26178	1	0101101000 (1) 0111101000
26177	1	0101101000 (1) 0001101000
26435	1	0100011000 (1) 0100011010
26434	1	0100011000 (1) 0100011100
26433	1	0100011000 (1) 0100001000
26432	1	0100011000 (1) 0101011000
26431	1	0100011000 (1) 0000011000
25937	1	0011000100 (1) 0011000110
25936	1	0011000100 (1) 0011000000
25935	1	0011000100 (1) 0011100100
25934	1	0011000100 (1) 0010000100
25879	1	1111000100 (1) 1111000110
25878	1	1111000100 (1) 1111000000
25877	1	1111000100 (1) 1111100100
25876	1	1111000100 (1) 1110000100
25875	1	1111000100 (1) 1101000100
25852	1	0111000100 (1) 0111000110
25851	1	0111000100 (1) 0111000000
25850	1	0111000100 (1) 0111100100
25849	1	0111000100 (1) 0110000100
25848	1	0111000100 (1) 0101000100
25847	1	0111000100 (1) 0011000100
26649	1	0000000010 (1) 0001000010
26644	1	1000000010 (1) 1001000010
26643	1	1000000010 (1) 1100000010
26638	1	1100000010 (1) 1101000010
26416	1	1010011000 (1) 1010011010
26415	1	1010011000 (1) 1010011100
26414	1	1010011000 (1) 1010001000
26413	1	1010011000 (1) 1000011000
26151	1	1000100100 (1) 1000100000
26150	1	1000100100 (1) 1000110100
26149	1	1000100100 (1) 1001100100
26148	1	1000100100 (1) 1010100100
26147	1	1000100100 (1) 1100100100
26632	1	0100000010 (1) 0101000010
26631	1	0100000010 (1) 0000000010
26403	1	0010011000 (1) 0010011010
26402	1	0010011000 (1) 0010011100
26401	1	0010011000 (1) 0010001000
26400	1	0010011000 (1) 0000011000
26117	1	0000100100 (1) 0000100000
26116	1	0000100100 (1) 0000110100
26115	1	0000100100 (1) 0001100100
26114	1	0000100100 (1) 0010100100
25905	1	0011101000 (1) 0011100000
25904	1	0011101000 (1) 0011111000
25903	1	0011101000 (1) 0011001000
25902	1	0011101000 (1) 0010101000
25901	1	1011101000 (1) 1011100000
25900	1	1011101000 (1) 1011111000
25899	1	1011101000 (1) 1011001000
25898	1	1011101000 (1) 1010101000
25897	1	1011101000 (1) 1111101000
26388	1	1110011000 (1) 1110011010
26387	1	1110011000 (1) 1110011100
26386	1	1110011000 (1) 1110001000
26385	1	1110011000 (1) 1100011000
26384	1	1110011000 (1) 1010011000
26089	1	1111101000 (1) 1111100000
26088	1	1111101000 (1) 1111111000
26087	1	1111101000 (1) 1110101000
26103	1	1100100100 (1) 1100100000
26102	1	1100100100 (1) 1100110100
26101	1	1100100100 (1) 1101100100
26100	1	1100100100 (1) 1110100100
26372	1	0110011000 (1) 0110011010
26371	1	0110011000 (1) 0110011100
26370	1	0110011000 (1) 0110001000
26369	1	0110011000 (1) 0100011000
26368	1	0110011000 (1) 0010011000
26054	1	0111101000 (1) 0111100000
26053	1	0111101000 (1) 0111111000
26052	1	0111101000 (1) 0110101000
26051	1	0111101000 (1) 0011101000
26074	1	0100100100 (1) 0100100000
26073	1	0100100100 (1) 0100110100
26072	1	0100100100 (1) 0101100100
26071	1	0100100100 (1) 0110100100
26070	1	0100100100 (1) 0000100100
26624	1	1010000010 (1) 1000000010
26623	1	1010000010 (1) 1110000010
26618	1	0010000010 (1) 0000000010
26617	1	1110000010 (1) 1100000010
26009	1	1010100100 (1) 1010100000
26008	1	1010100100 (1) 1010110100
26007	1	1010100100 (1) 1110100100
26613	1	0110000010 (1) 0100000010
26612	1	0110000010 (1) 0010000010
26000	1	0010100100 (1) 0010100000
25999	1	0010100100 (1) 0010110100
25982	1	1110100100 (1) 1110100000
25981	1	1110100100 (1) 1110110100
26366	1	1001011000 (1) 1001011010
26365	1	1001011000 (1) 1001011100
26364	1	1001011000 (1) 1001001000
26362	1	0001011000 (1) 0001011010
26361	1	0001011000 (1) 0001011100
26360	1	0001011000 (1) 0001001000
25965	1	0110100100 (1) 0110100000
25964	1	0110100100 (1) 0110110100
25963	1	0110100100 (1) 0010100100
26356	1	1101011000 (1) 1101011010
26355	1	1101011000 (1) 1101011100
26354	1	1101011000 (1) 1101001000
26353	1	1101011000 (1) 1101111000
26352	1	1101011000 (1) 1001011000
26348	1	0101011000 (1) 0101011010
26347	1	0101011000 (1) 0101011100
26346	1	0101011000 (1) 0101001000
26345	1	0101011000 (1) 0101111000
26344	1	0101011000 (1) 0001011000
26611	1	1001000010 (1) 1101000010
26610	1	1101000010 (1) 1101100010
25952	1	1001100100 (1) 1001100000
25951	1	1001100100 (1) 1001110100
25950	1	1001100100 (1) 1011100100
25949	1	1001100100 (1) 1101100100
26299	1	1011011000 (1) 1011011010
26298	1	1011011000 (1) 1011011100
26297	1	1011011000 (1) 1011001000
26296	1	1011011000 (1) 1010011000
26295	1	1011011000 (1) 1001011000
26607	1	0101000010 (1) 0101100010
26606	1	0101000010 (1) 0001000010
25940	1	0001100100 (1) 0001100000
25939	1	0001100100 (1) 0001110100
25938	1	0001100100 (1) 0011100100
26286	1	0011011000 (1) 0011011010
26285	1	0011011000 (1) 0011011100
26284	1	0011011000 (1) 0011001000
26283	1	0011011000 (1) 0010011000
26282	1	0011011000 (1) 0001011000
25720	1	0000010100 (1) 0000010110
25719	1	0000010100 (1) 0000010000
25718	1	0000010100 (1) 0000011100
25717	1	0000010100 (1) 0000000100
25716	1	0000010100 (1) 0000110100
25715	1	0000010100 (1) 0001010100
25714	1	0000010100 (1) 0010010100
25697	1	1000010100 (1) 1000010110
25696	1	1000010100 (1) 1000010000
25695	1	1000010100 (1) 1000011100
25694	1	1000010100 (1) 1000000100
25693	1	1000010100 (1) 1000110100
25692	1	1000010100 (1) 1001010100
25691	1	1000010100 (1) 1010010100
25931	1	1101100100 (1) 1101100000
25930	1	1101100100 (1) 1101110100
25929	1	1101100100 (1) 1111100100
25925	1	0101100100 (1) 0101100000
25924	1	0101100100 (1) 0101110100
25923	1	0101100100 (1) 0111100100
25922	1	0101100100 (1) 0001100100
26269	1	0111011000 (1) 0111011010
26268	1	0111011000 (1) 0111011100
26267	1	0111011000 (1) 0111001000
26266	1	0111011000 (1) 0111111000
26265	1	0111011000 (1) 0110011000
26264	1	0111011000 (1) 0101011000
26263	1	0111011000 (1) 0011011000
26250	1	1111011000 (1) 1111011010
26249	1	1111011000 (1) 1111011100
26248	1	1111011000 (1) 1111001000
26247	1	1111011000 (1) 1111111000
26246	1	1111011000 (1) 1110011000
26245	1	1111011000 (1) 1101011000
26244	1	1111011000 (1) 1011011000
25640	1	0100010100 (1) 0100010110
25639	1	0100010100 (1) 0100010000
25638	1	0100010100 (1) 0100011100
25637	1	0100010100 (1) 0100000100
25636	1	0100010100 (1) 0100110100
25635	1	0100010100 (1) 0101010100
25634	1	0100010100 (1) 0000010100
25622	1	1100010100 (1) 1100010110
25621	1	1100010100 (1) 1100010000
25620	1	1100010100 (1) 1100011100
25619	1	1100010100 (1) 1100000100
25618	1	1100010100 (1) 1100110100
25617	1	1100010100 (1) 1101010100
25616	1	1100010100 (1) 1000010100
26226	1	1000111000 (1) 1000111100
26225	1	1000111000 (1) 1000011000
26224	1	1000111000 (1) 1001111000
26223	1	1000111000 (1) 1010111000
26598	1	1011000010 (1) 1010000010
26597	1	1011000010 (1) 1001000010
26596	1	1011000010 (1) 1111000010
26222	1	0000111000 (1) 0000111100
26221	1	0000111000 (1) 0000011000
26220	1	0000111000 (1) 0001111000
26219	1	0000111000 (1) 0010111000
26588	1	0011000010 (1) 0010000010
26587	1	0011000010 (1) 0001000010
26211	1	1100111000 (1) 1100111100
26210	1	1100111000 (1) 1100011000
26209	1	1100111000 (1) 1101111000
26208	1	1100111000 (1) 1110111000
26207	1	1100111000 (1) 1000111000
26586	1	1111000010 (1) 1111100010
26585	1	1111000010 (1) 1110000010
26584	1	1111000010 (1) 1101000010
25883	1	1011100100 (1) 1011100000
25882	1	1011100100 (1) 1011110100
25881	1	1011100100 (1) 1010100100
25880	1	1011100100 (1) 1111100100
26206	1	0100111000 (1) 0100111100
26205	1	0100111000 (1) 0100011000
26204	1	0100111000 (1) 0101111000
26203	1	0100111000 (1) 0110111000
26202	1	0100111000 (1) 0000111000
25862	1	0011100100 (1) 0011100000
25861	1	0011100100 (1) 0011110100
25860	1	0011100100 (1) 0010100100
26576	1	0111000010 (1) 0111100010
26575	1	0111000010 (1) 0110000010
26574	1	0111000010 (1) 0101000010
26573	1	0111000010 (1) 0011000010
25702	1	0010010100 (1) 0010010110
25701	1	0010010100 (1) 0010010000
25700	1	0010010100 (1) 0010011100
25699	1	0010010100 (1) 0010000100
25698	1	0010010100 (1) 0010110100
25679	1	1010010100 (1) 1010010110
25678	1	1010010100 (1) 1010010000
25677	1	1010010100 (1) 1010011100
25676	1	1010010100 (1) 1010000100
25675	1	1010010100 (1) 1010110100
25855	1	1111100100 (1) 1111100000
25854	1	1111100100 (1) 1111110100
25853	1	1111100100 (1) 1110100100
25841	1	0111100100 (1) 0111100000
25840	1	0111100100 (1) 0111110100
25839	1	0111100100 (1) 0110100100
25838	1	0111100100 (1) 0011100100
25563	1	0110010100 (1) 0110010110
25562	1	0110010100 (1) 0110010000
25561	1	0110010100 (1) 0110011100
25560	1	0110010100 (1) 0110000100
25559	1	0110010100 (1) 0110110100
25558	1	0110010100 (1) 0100010100
25557	1	0110010100 (1) 0010010100
25551	1	1110010100 (1) 1110010110
25550	1	1110010100 (1) 1110010000
25549	1	1110010100 (1) 1110011100
25548	1	1110010100 (1) 1110000100
25547	1	1110010100 (1) 1110110100
25546	1	1110010100 (1) 1100010100
25545	1	1110010100 (1) 1010010100
25539	1	1000100010 (1) 1000100000
25538	1	1000100010 (1) 1000110010
25537	1	1000100010 (1) 1000000010
25536	1	1000100010 (1) 1001100010
25535	1	1000100010 (1) 1010100010
25534	1	1000100010 (1) 1100100010
25515	1	0000100010 (1) 0000100000
25514	1	0000100010 (1) 0000110010
25513	1	0000100010 (1) 0000000010
25512	1	0000100010 (1) 0001100010
25511	1	0000100010 (1) 0010100010
26201	1	1010111000 (1) 1010111100
26200	1	1010111000 (1) 1010011000
25520	1	1100100010 (1) 1100100000
25519	1	1100100010 (1) 1100110010
25518	1	1100100010 (1) 1100000010
25517	1	1100100010 (1) 1101100010
25516	1	1100100010 (1) 1110100010
26197	1	0010111000 (1) 0010111100
26196	1	0010111000 (1) 0010011000
25489	1	0100100010 (1) 0100100000
25488	1	0100100010 (1) 0100110010
25487	1	0100100010 (1) 0100000010
25486	1	0100100010 (1) 0101100010
25485	1	0100100010 (1) 0110100010
25484	1	0100100010 (1) 0000100010
25474	1	0000000001 (1) 0000000011
25473	1	0000000001 (1) 0000000101
25472	1	0000000001 (1) 0001000001
25463	1	1000000001 (1) 1000000011
25462	1	1000000001 (1) 1000000101
25461	1	1000000001 (1) 1001000001
25460	1	1000000001 (1) 1100000001
26194	1	1110111000 (1) 1110111100
26193	1	1110111000 (1) 1110011000
26192	1	1110111000 (1) 1010111000
26186	1	0110111000 (1) 0110111100
26185	1	0110111000 (1) 0110011000
26184	1	0110111000 (1) 0010111000
25448	1	1100000001 (1) 1100000011
25447	1	1100000001 (1) 1100000101
25446	1	1100000001 (1) 1101000001
25433	1	0100000001 (1) 0100000011
25432	1	0100000001 (1) 0100000101
25431	1	0100000001 (1) 0101000001
25430	1	0100000001 (1) 0000000001
25708	1	0001010100 (1) 0001010110
25707	1	0001010100 (1) 0001010000
25706	1	0001010100 (1) 0001011100
25705	1	0001010100 (1) 0001000100
25704	1	0001010100 (1) 0001110100
25703	1	0001010100 (1) 0011010100
25685	1	1001010100 (1) 1001010110
25684	1	1001010100 (1) 1001010000
25683	1	1001010100 (1) 1001011100
25682	1	1001010100 (1) 1001000100
25681	1	1001010100 (1) 1001110100
25680	1	1001010100 (1) 1011010100
25524	1	1010100010 (1) 1010100000
25523	1	1010100010 (1) 1010110010
25522	1	1010100010 (1) 1010000010
25521	1	1010100010 (1) 1110100010
25502	1	0010100010 (1) 0010100000
25501	1	0010100010 (1) 0010110010
25500	1	0010100010 (1) 0010000010
25628	1	0101010100 (1) 0101010110
25627	1	0101010100 (1) 0101010000
25626	1	0101010100 (1) 0101011100
25625	1	0101010100 (1) 0101000100
25624	1	0101010100 (1) 0101110100
25623	1	0101010100 (1) 0001010100
25610	1	1101010100 (1) 1101010110
25609	1	1101010100 (1) 1101010000
25608	1	1101010100 (1) 1101011100
25607	1	1101010100 (1) 1101000100
25606	1	1101010100 (1) 1101110100
25605	1	1101010100 (1) 1001010100
25493	1	1110100010 (1) 1110100000
25492	1	1110100010 (1) 1110110010
25491	1	1110100010 (1) 1110000010
25383	1	1000001100 (1) 1000001110
25382	1	1000001100 (1) 1000001000
25381	1	1000001100 (1) 1000000100
25380	1	1000001100 (1) 1001001100
25379	1	1000001100 (1) 1010001100
25378	1	1000001100 (1) 1100001100
25359	1	0000001100 (1) 0000001110
25358	1	0000001100 (1) 0000001000
25357	1	0000001100 (1) 0000000100
25356	1	0000001100 (1) 0001001100
25355	1	0000001100 (1) 0010001100
25478	1	0110100010 (1) 0110100000
25477	1	0110100010 (1) 0110110010
25476	1	0110100010 (1) 0110000010
25475	1	0110100010 (1) 0010100010
25340	1	1010000001 (1) 1010000011
25339	1	1010000001 (1) 1010000101
25338	1	1010000001 (1) 1000000001
25337	1	1010000001 (1) 1110000001
25327	1	0010000001 (1) 0010000011
25326	1	0010000001 (1) 0010000101
25325	1	0010000001 (1) 0000000001
25363	1	1100001100 (1) 1100001110
25362	1	1100001100 (1) 1100001000
25361	1	1100001100 (1) 1100000100
25360	1	1100001100 (1) 1101001100
26096	1	1001111000 (1) 1001111100
26095	1	1001111000 (1) 1001011000
26094	1	1001111000 (1) 1011111000
25311	1	0100001100 (1) 0100001110
25310	1	0100001100 (1) 0100001000
25309	1	0100001100 (1) 0100000100
25308	1	0100001100 (1) 0101001100
25307	1	0100001100 (1) 0000001100
26086	1	0001111000 (1) 0001111100
26085	1	0001111000 (1) 0001011000
26084	1	0001111000 (1) 0011111000
25330	1	1110000001 (1) 1110000011
25329	1	1110000001 (1) 1110000101
25328	1	1110000001 (1) 1100000001
25290	1	0110000001 (1) 0110000011
25289	1	0110000001 (1) 0110000101
25288	1	0110000001 (1) 0100000001
25287	1	0110000001 (1) 0010000001
26050	1	1101111000 (1) 1101111100
26049	1	1101111000 (1) 1111111000
26048	1	1101111000 (1) 1001111000
26047	1	0101111000 (1) 0101111100
26046	1	0101111000 (1) 0111111000
26045	1	0101111000 (1) 0001111000
25414	1	0011010100 (1) 0011010110
25413	1	0011010100 (1) 0011010000
25412	1	0011010100 (1) 0011011100
25411	1	0011010100 (1) 0011000100
25410	1	0011010100 (1) 0011110100
25409	1	0011010100 (1) 0010010100
25404	1	1011010100 (1) 1011010110
25403	1	1011010100 (1) 1011010000
25402	1	1011010100 (1) 1011011100
25401	1	1011010100 (1) 1011000100
25400	1	1011010100 (1) 1011110100
25399	1	1011010100 (1) 1010010100
25267	1	0111010100 (1) 0111010110
25266	1	0111010100 (1) 0111010000
25265	1	0111010100 (1) 0111011100
25264	1	0111010100 (1) 0111000100
25263	1	0111010100 (1) 0111110100
25262	1	0111010100 (1) 0110010100
25261	1	0111010100 (1) 0101010100
25260	1	0111010100 (1) 0011010100
25253	1	1111010100 (1) 1111010110
25252	1	1111010100 (1) 1111010000
25251	1	1111010100 (1) 1111011100
25250	1	1111010100 (1) 1111000100
25249	1	1111010100 (1) 1111110100
25248	1	1111010100 (1) 1110010100
25247	1	1111010100 (1) 1101010100
25246	1	1111010100 (1) 1011010100
26495	1	1000010010 (1) 1000000010
26494	1	1000010010 (1) 1001010010
25367	1	1010001100 (1) 1010001110
25366	1	1010001100 (1) 1010001000
25365	1	1010001100 (1) 1010000100
25364	1	1010001100 (1) 1110001100
25529	1	1001100010 (1) 1001100000
25528	1	1001100010 (1) 1001110010
25527	1	1001100010 (1) 1001000010
25526	1	1001100010 (1) 1011100010
25525	1	1001100010 (1) 1101100010
26476	1	0000010010 (1) 0000000010
26475	1	0000010010 (1) 0001010010
25346	1	0010001100 (1) 0010001110
25345	1	0010001100 (1) 0010001000
25344	1	0010001100 (1) 0010000100
25506	1	0001100010 (1) 0001100000
25505	1	0001100010 (1) 0001110010
25504	1	0001100010 (1) 0001000010
25503	1	0001100010 (1) 0011100010
25236	1	1110001100 (1) 1110001110
25235	1	1110001100 (1) 1110001000
25234	1	1110001100 (1) 1110000100
25233	1	1110001100 (1) 1100001100
25749	1	1101100010 (1) 1101100000
25748	1	1101100010 (1) 1101110010
25747	1	1101100010 (1) 1111100010
26459	1	1100010010 (1) 1100000010
26458	1	1100010010 (1) 1101010010
26457	1	1100010010 (1) 1000010010
25465	1	0001000001 (1) 0001000011
25464	1	0001000001 (1) 0001000101
25451	1	1001000001 (1) 1001000011
25450	1	1001000001 (1) 1001000101
25449	1	1001000001 (1) 1101000001
25980	1	1011111000 (1) 1011111100
25979	1	1011111000 (1) 1011011000
25978	1	1011111000 (1) 1010111000
25831	1	1000110100 (1) 1000110000
25830	1	1000110100 (1) 1000111100
25829	1	1000110100 (1) 1001110100
25828	1	1000110100 (1) 1010110100
25735	1	0101100010 (1) 0101100000
25734	1	0101100010 (1) 0101110010
25733	1	0101100010 (1) 0111100010
25732	1	0101100010 (1) 0001100010
26438	1	0100010010 (1) 0100000010
26437	1	0100010010 (1) 0101010010
26436	1	0100010010 (1) 0000010010
25194	1	0110001100 (1) 0110001110
25193	1	0110001100 (1) 0110001000
25192	1	0110001100 (1) 0110000100
25191	1	0110001100 (1) 0100001100
25190	1	0110001100 (1) 0010001100
25977	1	0011111000 (1) 0011111100
25976	1	0011111000 (1) 0011011000
25975	1	0011111000 (1) 0010111000
25821	1	0000110100 (1) 0000110000
25820	1	0000110100 (1) 0000111100
25819	1	0000110100 (1) 0001110100
25818	1	0000110100 (1) 0010110100
25962	1	1111111000 (1) 1111111100
25961	1	1111111000 (1) 1110111000
25960	1	1111111000 (1) 1011111000
25808	1	1100110100 (1) 1100110000
25807	1	1100110100 (1) 1100111100
25806	1	1100110100 (1) 1101110100
25805	1	1100110100 (1) 1110110100
25804	1	1100110100 (1) 1000110100
25959	1	0111111000 (1) 0111111100
25958	1	0111111000 (1) 0110111000
25957	1	0111111000 (1) 0011111000
25794	1	0100110100 (1) 0100110000
25793	1	0100110100 (1) 0100111100
25792	1	0100110100 (1) 0101110100
25791	1	0100110100 (1) 0110110100
25790	1	0100110100 (1) 0000110100
25436	1	1101000001 (1) 1101000011
25435	1	1101000001 (1) 1101000101
25434	1	1101000001 (1) 1101100001
25422	1	0101000001 (1) 0101000011
25421	1	0101000001 (1) 0101000101
25420	1	0101000001 (1) 0101100001
25419	1	0101000001 (1) 0001000001
26418	1	1010010010 (1) 1010000010
26417	1	1010010010 (1) 1000010010
25229	1	1011100010 (1) 1011100000
25228	1	1011100010 (1) 1011110010
25227	1	1011100010 (1) 1011000010
25226	1	1011100010 (1) 1010100010
25225	1	1011100010 (1) 1111100010
26405	1	0010010010 (1) 0010000010
26404	1	0010010010 (1) 0000010010
25219	1	0011100010 (1) 0011100000
25218	1	0011100010 (1) 0011110010
25217	1	0011100010 (1) 0011000010
25216	1	0011100010 (1) 0010100010
25787	1	0010110100 (1) 0010110000
25786	1	0010110100 (1) 0010111100
26391	1	1110010010 (1) 1110000010
26390	1	1110010010 (1) 1100010010
26389	1	1110010010 (1) 1010010010
25789	1	1010110100 (1) 1010110000
25788	1	1010110100 (1) 1010111100
25156	1	0011000001 (1) 0011000011
25155	1	0011000001 (1) 0011000101
25154	1	0011000001 (1) 0010000001
25153	1	0011000001 (1) 0001000001
25594	1	1111100010 (1) 1111100000
25593	1	1111100010 (1) 1111110010
25592	1	1111100010 (1) 1110100010
25372	1	1001001100 (1) 1001001110
25371	1	1001001100 (1) 1001001000
25370	1	1001001100 (1) 1001000100
25369	1	1001001100 (1) 1011001100
25368	1	1001001100 (1) 1101001100
26375	1	0110010010 (1) 0110000010
26374	1	0110010010 (1) 0100010010
26373	1	0110010010 (1) 0010010010
25350	1	0001001100 (1) 0001001110
25349	1	0001001100 (1) 0001001000
25348	1	0001001100 (1) 0001000100
25347	1	0001001100 (1) 0011001100
25581	1	0111100010 (1) 0111100000
25580	1	0111100010 (1) 0111110010
25579	1	0111100010 (1) 0110100010
25578	1	0111100010 (1) 0011100010
25124	1	1011000001 (1) 1011000011
25123	1	1011000001 (1) 1011000101
25122	1	1011000001 (1) 1010000001
25121	1	1011000001 (1) 1001000001
25120	1	1011000001 (1) 1111000001
25785	1	1110110100 (1) 1110110000
25784	1	1110110100 (1) 1110111100
25783	1	1110110100 (1) 1010110100
25317	1	1101001100 (1) 1101001110
25316	1	1101001100 (1) 1101001000
25315	1	1101001100 (1) 1101000100
25314	1	1101001100 (1) 1101101100
25770	1	0110110100 (1) 0110110000
25769	1	0110110100 (1) 0110111100
25768	1	0110110100 (1) 0010110100
25302	1	0101001100 (1) 0101001110
25301	1	0101001100 (1) 0101001000
25300	1	0101001100 (1) 0101000100
25299	1	0101001100 (1) 0101101100
25298	1	0101001100 (1) 0001001100
25111	1	1111000001 (1) 1111000011
25110	1	1111000001 (1) 1111000101
25109	1	1111000001 (1) 1111100001
25108	1	1111000001 (1) 1110000001
25107	1	1111000001 (1) 1101000001
25079	1	0111000001 (1) 0111000011
25078	1	0111000001 (1) 0111000101
25077	1	0111000001 (1) 0111100001
25076	1	0111000001 (1) 0110000001
25075	1	0111000001 (1) 0101000001
25074	1	0111000001 (1) 0011000001
25059	1	0000100001 (1) 0000100101
25058	1	0000100001 (1) 0000110001
25057	1	0000100001 (1) 0000000001
25056	1	0000100001 (1) 0001100001
25055	1	0000100001 (1) 0010100001
25039	1	1000100001 (1) 1000100101
25038	1	1000100001 (1) 1000110001
25037	1	1000100001 (1) 1000000001
25036	1	1000100001 (1) 1001100001
25035	1	1000100001 (1) 1010100001
25034	1	1000100001 (1) 1100100001
26367	1	1001010010 (1) 1001000010
25139	1	1011001100 (1) 1011001110
25138	1	1011001100 (1) 1011001000
25137	1	1011001100 (1) 1011000100
25136	1	1011001100 (1) 1010001100
25135	1	1011001100 (1) 1111001100
26363	1	0001010010 (1) 0001000010
25131	1	0011001100 (1) 0011001110
25130	1	0011001100 (1) 0011001000
25129	1	0011001100 (1) 0011000100
25128	1	0011001100 (1) 0010001100
25015	1	1100100001 (1) 1100100101
25014	1	1100100001 (1) 1100110001
25013	1	1100100001 (1) 1100000001
25012	1	1100100001 (1) 1101100001
25011	1	1100100001 (1) 1110100001
24985	1	0100100001 (1) 0100100101
24984	1	0100100001 (1) 0100110001
24983	1	0100100001 (1) 0100000001
24982	1	0100100001 (1) 0101100001
24981	1	0100100001 (1) 0110100001
24980	1	0100100001 (1) 0000100001
26359	1	1101010010 (1) 1101000010
26358	1	1101010010 (1) 1101110010
26357	1	1101010010 (1) 1001010010
25746	1	1001110100 (1) 1001110000
25745	1	1001110100 (1) 1001111100
25744	1	1001110100 (1) 1011110100
25006	1	1111001100 (1) 1111001110
25005	1	1111001100 (1) 1111001000
25004	1	1111001100 (1) 1111000100
25003	1	1111001100 (1) 1111101100
25002	1	1111001100 (1) 1110001100
25001	1	1111001100 (1) 1101001100
26351	1	0101010010 (1) 0101000010
26350	1	0101010010 (1) 0101110010
26349	1	0101010010 (1) 0001010010
25731	1	0001110100 (1) 0001110000
25730	1	0001110100 (1) 0001111100
25729	1	0001110100 (1) 0011110100
24956	1	0111001100 (1) 0111001110
24955	1	0111001100 (1) 0111001000
24954	1	0111001100 (1) 0111000100
24953	1	0111001100 (1) 0111101100
24952	1	0111001100 (1) 0110001100
24951	1	0111001100 (1) 0101001100
24950	1	0111001100 (1) 0011001100
25674	1	1101110100 (1) 1101110000
25673	1	1101110100 (1) 1101111100
25672	1	1101110100 (1) 1111110100
25671	1	1101110100 (1) 1001110100
26339	1	1000001010 (1) 1000000010
26338	1	1000001010 (1) 1001001010
26337	1	1000001010 (1) 1100001010
25670	1	0101110100 (1) 0101110000
25669	1	0101110100 (1) 0101111100
25668	1	0101110100 (1) 0111110100
25667	1	0101110100 (1) 0001110100
26327	1	0000001010 (1) 0000000010
26326	1	0000001010 (1) 0001001010
26323	1	1100001010 (1) 1100000010
26322	1	1100001010 (1) 1101001010
26314	1	0100001010 (1) 0100000010
26313	1	0100001010 (1) 0101001010
26312	1	0100001010 (1) 0000001010
24938	1	0000101100 (1) 0000101000
24937	1	0000101100 (1) 0000100100
24936	1	0000101100 (1) 0000111100
24935	1	0000101100 (1) 0000001100
24934	1	0000101100 (1) 0001101100
24933	1	0000101100 (1) 0010101100
24923	1	1000101100 (1) 1000101000
24922	1	1000101100 (1) 1000100100
24921	1	1000101100 (1) 1000111100
24920	1	1000101100 (1) 1000001100
24919	1	1000101100 (1) 1001101100
24918	1	1000101100 (1) 1010101100
24917	1	1000101100 (1) 1100101100
25042	1	0010100001 (1) 0010100101
25041	1	0010100001 (1) 0010110001
25040	1	0010100001 (1) 0010000001
25019	1	1010100001 (1) 1010100101
25018	1	1010100001 (1) 1010110001
25017	1	1010100001 (1) 1010000001
25016	1	1010100001 (1) 1110100001
26302	1	1011010010 (1) 1011000010
26301	1	1011010010 (1) 1010010010
26300	1	1011010010 (1) 1001010010
26289	1	0011010010 (1) 0011000010
26288	1	0011010010 (1) 0010010010
26287	1	0011010010 (1) 0001010010
24905	1	1100101100 (1) 1100101000
24904	1	1100101100 (1) 1100100100
24903	1	1100101100 (1) 1100111100
24902	1	1100101100 (1) 1100001100
24901	1	1100101100 (1) 1101101100
24900	1	1100101100 (1) 1110101100
24886	1	0100101100 (1) 0100101000
24885	1	0100101100 (1) 0100100100
24884	1	0100101100 (1) 0100111100
24883	1	0100101100 (1) 0100001100
24882	1	0100101100 (1) 0101101100
24881	1	0100101100 (1) 0110101100
24880	1	0100101100 (1) 0000101100
24988	1	1110100001 (1) 1110100101
24987	1	1110100001 (1) 1110110001
24986	1	1110100001 (1) 1110000001
24969	1	0110100001 (1) 0110100101
24968	1	0110100001 (1) 0110110001
24967	1	0110100001 (1) 0110000001
24966	1	0110100001 (1) 0010100001
25591	1	1011110100 (1) 1011110000
25590	1	1011110100 (1) 1011111100
25589	1	1011110100 (1) 1010110100
25584	1	0011110100 (1) 0011110000
25583	1	0011110100 (1) 0011111100
25582	1	0011110100 (1) 0010110100
26274	1	0111010010 (1) 0111000010
26273	1	0111010010 (1) 0111110010
26272	1	0111010010 (1) 0110010010
26271	1	0111010010 (1) 0101010010
26270	1	0111010010 (1) 0011010010
26255	1	1111010010 (1) 1111000010
26254	1	1111010010 (1) 1111110010
26253	1	1111010010 (1) 1110010010
26252	1	1111010010 (1) 1101010010
26251	1	1111010010 (1) 1011010010
25571	1	1111110100 (1) 1111110000
25570	1	1111110100 (1) 1111111100
25569	1	1111110100 (1) 1110110100
25568	1	1111110100 (1) 1011110100
26239	1	1010001010 (1) 1010000010
26238	1	1010001010 (1) 1000001010
26237	1	1010001010 (1) 1110001010
25567	1	0111110100 (1) 0111110000
25566	1	0111110100 (1) 0111111100
25565	1	0111110100 (1) 0110110100
25564	1	0111110100 (1) 0011110100
26230	1	0010001010 (1) 0010000010
26229	1	0010001010 (1) 0000001010
26228	1	1110001010 (1) 1110000010
26227	1	1110001010 (1) 1100001010
25533	1	1000110010 (1) 1000110000
25532	1	1000110010 (1) 1000010010
25531	1	1000110010 (1) 1001110010
25530	1	1000110010 (1) 1010110010
26214	1	0110001010 (1) 0110000010
26213	1	0110001010 (1) 0100001010
26212	1	0110001010 (1) 0010001010
25510	1	0000110010 (1) 0000110000
25509	1	0000110010 (1) 0000010010
25508	1	0000110010 (1) 0001110010
25507	1	0000110010 (1) 0010110010
24927	1	0010101100 (1) 0010101000
24926	1	0010101100 (1) 0010100100
24925	1	0010101100 (1) 0010111100
24924	1	0010101100 (1) 0010001100
24910	1	1010101100 (1) 1010101000
24909	1	1010101100 (1) 1010100100
24908	1	1010101100 (1) 1010111100
24907	1	1010101100 (1) 1010001100
24906	1	1010101100 (1) 1110101100
24890	1	1110101100 (1) 1110101000
24889	1	1110101100 (1) 1110100100
24888	1	1110101100 (1) 1110111100
24887	1	1110101100 (1) 1110001100
25498	1	1100110010 (1) 1100110000
25497	1	1100110010 (1) 1100010010
25496	1	1100110010 (1) 1101110010
25495	1	1100110010 (1) 1110110010
25494	1	1100110010 (1) 1000110010
24879	1	0110101100 (1) 0110101000
24878	1	0110101100 (1) 0110100100
24877	1	0110101100 (1) 0110111100
24876	1	0110101100 (1) 0110001100
24875	1	0110101100 (1) 0010101100
25483	1	0100110010 (1) 0100110000
25482	1	0100110010 (1) 0100010010
25481	1	0100110010 (1) 0101110010
25480	1	0100110010 (1) 0110110010
25479	1	0100110010 (1) 0000110010
24863	1	1000010001 (1) 1000010011
24862	1	1000010001 (1) 1000010101
24861	1	1000010001 (1) 1000011001
24860	1	1000010001 (1) 1000000001
24859	1	1000010001 (1) 1001010001
24841	1	0000010001 (1) 0000010011
24840	1	0000010001 (1) 0000010101
24839	1	0000010001 (1) 0000011001
24838	1	0000010001 (1) 0000000001
24837	1	0000010001 (1) 0001010001
25046	1	0001100001 (1) 0001100101
25045	1	0001100001 (1) 0001110001
25044	1	0001100001 (1) 0001000001
25043	1	0001100001 (1) 0011100001
25024	1	1001100001 (1) 1001100101
25023	1	1001100001 (1) 1001110001
25022	1	1001100001 (1) 1001000001
25021	1	1001100001 (1) 1011100001
25020	1	1001100001 (1) 1101100001
25175	1	1101100001 (1) 1101100101
25174	1	1101100001 (1) 1101110001
25173	1	1101100001 (1) 1111100001
24791	1	1100010001 (1) 1100010011
24790	1	1100010001 (1) 1100010101
24789	1	1100010001 (1) 1100011001
24788	1	1100010001 (1) 1100000001
24787	1	1100010001 (1) 1101010001
24786	1	1100010001 (1) 1000010001
25166	1	0101100001 (1) 0101100101
25165	1	0101100001 (1) 0101110001
25164	1	0101100001 (1) 0111100001
25163	1	0101100001 (1) 0001100001
24757	1	0100010001 (1) 0100010011
24756	1	0100010001 (1) 0100010101
24755	1	0100010001 (1) 0100011001
24754	1	0100010001 (1) 0100000001
24753	1	0100010001 (1) 0101010001
24752	1	0100010001 (1) 0000010001
25398	1	1010110010 (1) 1010110000
25397	1	1010110010 (1) 1010010010
26199	1	1001001010 (1) 1001000010
26198	1	1001001010 (1) 1101001010
25396	1	0010110010 (1) 0010110000
25395	1	0010110010 (1) 0010010010
26195	1	0001001010 (1) 0001000010
25917	1	1000011100 (1) 1000011110
25916	1	1000011100 (1) 1000001100
25915	1	1000011100 (1) 1001011100
25914	1	1000011100 (1) 1010011100
26191	1	1101001010 (1) 1101000010
26190	1	1101001010 (1) 1101101010
25386	1	1110110010 (1) 1110110000
25385	1	1110110010 (1) 1110010010
25384	1	1110110010 (1) 1010110010
26183	1	0101001010 (1) 0101000010
26182	1	0101001010 (1) 0101101010
26181	1	0101001010 (1) 0001001010
25909	1	0000011100 (1) 0000011110
25908	1	0000011100 (1) 0000001100
25907	1	0000011100 (1) 0001011100
25906	1	0000011100 (1) 0010011100
25343	1	0110110010 (1) 0110110000
25342	1	0110110010 (1) 0110010010
25341	1	0110110010 (1) 0010110010
24932	1	0001101100 (1) 0001101000
24931	1	0001101100 (1) 0001100100
24930	1	0001101100 (1) 0001111100
24929	1	0001101100 (1) 0001001100
24928	1	0001101100 (1) 0011101100
24916	1	1001101100 (1) 1001101000
24915	1	1001101100 (1) 1001100100
24914	1	1001101100 (1) 1001111100
24913	1	1001101100 (1) 1001001100
24912	1	1001101100 (1) 1011101100
24911	1	1001101100 (1) 1101101100
24702	1	1010010001 (1) 1010010011
24701	1	1010010001 (1) 1010010101
24700	1	1010010001 (1) 1010011001
24699	1	1010010001 (1) 1010000001
24698	1	1010010001 (1) 1000010001
24686	1	0010010001 (1) 0010010011
24685	1	0010010001 (1) 0010010101
24684	1	0010010001 (1) 0010011001
24683	1	0010010001 (1) 0010000001
24682	1	0010010001 (1) 0000010001
24802	1	1011100001 (1) 1011100101
24801	1	1011100001 (1) 1011110001
24800	1	1011100001 (1) 1011000001
24799	1	1011100001 (1) 1010100001
24798	1	1011100001 (1) 1111100001
24813	1	0011100001 (1) 0011100101
24812	1	0011100001 (1) 0011110001
24811	1	0011100001 (1) 0011000001
24810	1	0011100001 (1) 0010100001
25891	1	1100011100 (1) 1100011110
25890	1	1100011100 (1) 1100001100
25889	1	1100011100 (1) 1101011100
25888	1	1100011100 (1) 1000011100
25103	1	1101101100 (1) 1101101000
25102	1	1101101100 (1) 1101100100
25101	1	1101101100 (1) 1101111100
25100	1	1101101100 (1) 1111101100
25869	1	0100011100 (1) 0100011110
25868	1	0100011100 (1) 0100001100
25867	1	0100011100 (1) 0101011100
25866	1	0100011100 (1) 0000011100
25095	1	0101101100 (1) 0101101000
25094	1	0101101100 (1) 0101100100
25093	1	0101101100 (1) 0101111100
25092	1	0101101100 (1) 0111101100
25091	1	0101101100 (1) 0001101100
24649	1	1110010001 (1) 1110010011
24648	1	1110010001 (1) 1110010101
24647	1	1110010001 (1) 1110011001
24646	1	1110010001 (1) 1110000001
24645	1	1110010001 (1) 1100010001
24644	1	1110010001 (1) 1010010001
25082	1	1111100001 (1) 1111100101
25081	1	1111100001 (1) 1111110001
25080	1	1111100001 (1) 1110100001
24622	1	0110010001 (1) 0110010011
24621	1	0110010001 (1) 0110010101
24620	1	0110010001 (1) 0110011001
24619	1	0110010001 (1) 0110000001
24618	1	0110010001 (1) 0100010001
24617	1	0110010001 (1) 0010010001
25063	1	0111100001 (1) 0111100101
25062	1	0111100001 (1) 0111110001
25061	1	0111100001 (1) 0110100001
25060	1	0111100001 (1) 0011100001
26156	1	1000000110 (1) 1000000010
26155	1	1000000110 (1) 1000100110
26154	1	1000000110 (1) 1001000110
26153	1	1000000110 (1) 1010000110
26152	1	1000000110 (1) 1100000110
26171	1	1011001010 (1) 1011000010
26170	1	1011001010 (1) 1010001010
26169	1	1011001010 (1) 1001001010
26168	1	1011001010 (1) 1111001010
26121	1	0000000110 (1) 0000000010
26120	1	0000000110 (1) 0000100110
26119	1	0000000110 (1) 0001000110
26118	1	0000000110 (1) 0010000110
26129	1	0011001010 (1) 0011000010
26128	1	0011001010 (1) 0010001010
26127	1	0011001010 (1) 0001001010
26106	1	1100000110 (1) 1100000010
26105	1	1100000110 (1) 1100100110
26104	1	1100000110 (1) 1101000110
25833	1	1010011100 (1) 1010011110
25832	1	1010011100 (1) 1010001100
26093	1	1111001010 (1) 1111000010
26092	1	1111001010 (1) 1111101010
26091	1	1111001010 (1) 1110001010
26090	1	1111001010 (1) 1101001010
25232	1	1001110010 (1) 1001110000
25231	1	1001110010 (1) 1001010010
25230	1	1001110010 (1) 1011110010
24708	1	1011101100 (1) 1011101000
24707	1	1011101100 (1) 1011100100
24706	1	1011101100 (1) 1011111100
24705	1	1011101100 (1) 1011001100
24704	1	1011101100 (1) 1010101100
24703	1	1011101100 (1) 1111101100
26078	1	0100000110 (1) 0100000010
26077	1	0100000110 (1) 0100100110
26076	1	0100000110 (1) 0101000110
26075	1	0100000110 (1) 0000000110
25823	1	0010011100 (1) 0010011110
25822	1	0010011100 (1) 0010001100
25222	1	0001110010 (1) 0001110000
25221	1	0001110010 (1) 0001010010
25220	1	0001110010 (1) 0011110010
24713	1	0011101100 (1) 0011101000
24712	1	0011101100 (1) 0011100100
24711	1	0011101100 (1) 0011111100
24710	1	0011101100 (1) 0011001100
24709	1	0011101100 (1) 0010101100
26059	1	0111001010 (1) 0111000010
26058	1	0111001010 (1) 0111101010
26057	1	0111001010 (1) 0110001010
26056	1	0111001010 (1) 0101001010
26055	1	0111001010 (1) 0011001010
25812	1	1110011100 (1) 1110011110
25811	1	1110011100 (1) 1110001100
25810	1	1110011100 (1) 1100011100
25809	1	1110011100 (1) 1010011100
25212	1	1101110010 (1) 1101110000
25211	1	1101110010 (1) 1111110010
25210	1	1101110010 (1) 1001110010
24960	1	1111101100 (1) 1111101000
24959	1	1111101100 (1) 1111100100
24958	1	1111101100 (1) 1111111100
24957	1	1111101100 (1) 1110101100
25798	1	0110011100 (1) 0110011110
25797	1	0110011100 (1) 0110001100
25796	1	0110011100 (1) 0100011100
25795	1	0110011100 (1) 0010011100
25197	1	0101110010 (1) 0101110000
25196	1	0101110010 (1) 0111110010
25195	1	0101110010 (1) 0001110010
24943	1	0111101100 (1) 0111101000
24942	1	0111101100 (1) 0111100100
24941	1	0111101100 (1) 0111111100
24940	1	0111101100 (1) 0110101100
24939	1	0111101100 (1) 0011101100
24845	1	1001010001 (1) 1001010011
24844	1	1001010001 (1) 1001010101
24843	1	1001010001 (1) 1001011001
24842	1	1001010001 (1) 1001000001
24823	1	0001010001 (1) 0001010011
24822	1	0001010001 (1) 0001010101
24821	1	0001010001 (1) 0001011001
24820	1	0001010001 (1) 0001000001
24531	1	0000101010 (1) 0000101000
24530	1	0000101010 (1) 0000100010
24529	1	0000101010 (1) 0000111010
24528	1	0000101010 (1) 0000001010
24527	1	0000101010 (1) 0001101010
24526	1	0000101010 (1) 0010101010
24510	1	1000101010 (1) 1000101000
24509	1	1000101010 (1) 1000100010
24508	1	1000101010 (1) 1000111010
24507	1	1000101010 (1) 1000001010
24506	1	1000101010 (1) 1001101010
24505	1	1000101010 (1) 1010101010
24504	1	1000101010 (1) 1100101010
24770	1	1101010001 (1) 1101010011
24769	1	1101010001 (1) 1101010101
24768	1	1101010001 (1) 1101011001
24767	1	1101010001 (1) 1101000001
24766	1	1101010001 (1) 1101110001
24765	1	1101010001 (1) 1001010001
24736	1	0101010001 (1) 0101010011
24735	1	0101010001 (1) 0101010101
24734	1	0101010001 (1) 0101011001
24733	1	0101010001 (1) 0101000001
24732	1	0101010001 (1) 0101110001
24731	1	0101010001 (1) 0001010001
26012	1	1010000110 (1) 1010000010
26011	1	1010000110 (1) 1010100110
26010	1	1010000110 (1) 1110000110
26002	1	0010000110 (1) 0010000010
26001	1	0010000110 (1) 0010100110
24486	1	1100101010 (1) 1100101000
24485	1	1100101010 (1) 1100100010
24484	1	1100101010 (1) 1100111010
24483	1	1100101010 (1) 1100001010
24482	1	1100101010 (1) 1101101010
24481	1	1100101010 (1) 1110101010
24434	1	0100101010 (1) 0100101000
24433	1	0100101010 (1) 0100100010
24432	1	0100101010 (1) 0100111010
24431	1	0100101010 (1) 0100001010
24430	1	0100101010 (1) 0101101010
24429	1	0100101010 (1) 0110101010
24428	1	0100101010 (1) 0000101010
24415	1	1000001001 (1) 1000001011
24414	1	1000001001 (1) 1000001101
24413	1	1000001001 (1) 1000000001
24412	1	1000001001 (1) 1001001001
24411	1	1000001001 (1) 1100001001
24393	1	0000001001 (1) 0000001011
24392	1	0000001001 (1) 0000001101
24391	1	0000001001 (1) 0000000001
24390	1	0000001001 (1) 0001001001
25985	1	1110000110 (1) 1110000010
25984	1	1110000110 (1) 1110100110
25983	1	1110000110 (1) 1100000110
25162	1	1011110010 (1) 1011110000
25161	1	1011110010 (1) 1011010010
25160	1	1011110010 (1) 1010110010
25159	1	0011110010 (1) 0011110000
25158	1	0011110010 (1) 0011010010
25157	1	0011110010 (1) 0010110010
25969	1	0110000110 (1) 0110000010
25968	1	0110000110 (1) 0110100110
25967	1	0110000110 (1) 0100000110
25966	1	0110000110 (1) 0010000110
24397	1	1100001001 (1) 1100001011
24396	1	1100001001 (1) 1100001101
24395	1	1100001001 (1) 1100000001
24394	1	1100001001 (1) 1101001001
24362	1	0100001001 (1) 0100001011
24361	1	0100001001 (1) 0100001101
24360	1	0100001001 (1) 0100000001
24359	1	0100001001 (1) 0101001001
24358	1	0100001001 (1) 0000001001
25146	1	1111110010 (1) 1111110000
25145	1	1111110010 (1) 1110110010
25144	1	1111110010 (1) 1011110010
25779	1	1001011100 (1) 1001011110
25778	1	1001011100 (1) 1001001100
25777	1	1001011100 (1) 1011011100
25127	1	0111110010 (1) 0111110000
25126	1	0111110010 (1) 0110110010
25125	1	0111110010 (1) 0011110010
25773	1	0001011100 (1) 0001011110
25772	1	0001011100 (1) 0001001100
25771	1	0001011100 (1) 0011011100
24338	1	1011010001 (1) 1011010011
24337	1	1011010001 (1) 1011010101
24336	1	1011010001 (1) 1011011001
24335	1	1011010001 (1) 1011000001
24334	1	1011010001 (1) 1010010001
24333	1	1011010001 (1) 1001010001
24318	1	0011010001 (1) 0011010011
24317	1	0011010001 (1) 0011010101
24316	1	0011010001 (1) 0011011001
24315	1	0011010001 (1) 0011000001
24314	1	0011010001 (1) 0010010001
24313	1	0011010001 (1) 0001010001
25762	1	1101011100 (1) 1101011110
25761	1	1101011100 (1) 1101001100
25760	1	1101011100 (1) 1101111100
25759	1	1101011100 (1) 1001011100
24514	1	0010101010 (1) 0010101000
24513	1	0010101010 (1) 0010100010
24512	1	0010101010 (1) 0010111010
24511	1	0010101010 (1) 0010001010
25753	1	0101011100 (1) 0101011110
25752	1	0101011100 (1) 0101001100
25751	1	0101011100 (1) 0101111100
25750	1	0101011100 (1) 0001011100
24491	1	1010101010 (1) 1010101000
24490	1	1010101010 (1) 1010100010
24489	1	1010101010 (1) 1010111010
24488	1	1010101010 (1) 1010001010
24487	1	1010101010 (1) 1110101010
24282	1	0111010001 (1) 0111010011
24281	1	0111010001 (1) 0111010101
24280	1	0111010001 (1) 0111011001
24279	1	0111010001 (1) 0111000001
24278	1	0111010001 (1) 0111110001
24277	1	0111010001 (1) 0110010001
24276	1	0111010001 (1) 0101010001
24275	1	0111010001 (1) 0011010001
24254	1	1111010001 (1) 1111010011
24253	1	1111010001 (1) 1111010101
24252	1	1111010001 (1) 1111011001
24251	1	1111010001 (1) 1111000001
24250	1	1111010001 (1) 1111110001
24249	1	1111010001 (1) 1110010001
24248	1	1111010001 (1) 1101010001
24247	1	1111010001 (1) 1011010001
24438	1	1110101010 (1) 1110101000
24437	1	1110101010 (1) 1110100010
24436	1	1110101010 (1) 1110111010
24435	1	1110101010 (1) 1110001010
24420	1	0110101010 (1) 0110101000
24419	1	0110101010 (1) 0110100010
24418	1	0110101010 (1) 0110111010
24417	1	0110101010 (1) 0110001010
24416	1	0110101010 (1) 0010101010
24216	1	1010001001 (1) 1010001011
24215	1	1010001001 (1) 1010001101
24214	1	1010001001 (1) 1010000001
24213	1	1010001001 (1) 1000001001
24212	1	1010001001 (1) 1110001001
24200	1	0010001001 (1) 0010001011
24199	1	0010001001 (1) 0010001101
24198	1	0010001001 (1) 0010000001
24197	1	0010001001 (1) 0000001001
25956	1	1001000110 (1) 1001000010
25955	1	1001000110 (1) 1001100110
25954	1	1001000110 (1) 1011000110
25953	1	1001000110 (1) 1101000110
25943	1	0001000110 (1) 0001000010
25942	1	0001000110 (1) 0001100110
25941	1	0001000110 (1) 0011000110
24204	1	1110001001 (1) 1110001011
24203	1	1110001001 (1) 1110001101
24202	1	1110001001 (1) 1110000001
24201	1	1110001001 (1) 1100001001
24176	1	0110001001 (1) 0110001011
24175	1	0110001001 (1) 0110001101
24174	1	0110001001 (1) 0110000001
24173	1	0110001001 (1) 0100001001
24172	1	0110001001 (1) 0010001001
25051	1	0000110001 (1) 0000110101
25050	1	0000110001 (1) 0000111001
25049	1	0000110001 (1) 0000010001
25048	1	0000110001 (1) 0001110001
25047	1	0000110001 (1) 0010110001
25029	1	1000110001 (1) 1000110101
25028	1	1000110001 (1) 1000111001
25027	1	1000110001 (1) 1000010001
25026	1	1000110001 (1) 1001110001
25025	1	1000110001 (1) 1010110001
25933	1	1101000110 (1) 1101000010
25932	1	1101000110 (1) 1101100110
25738	1	1011011100 (1) 1011011110
25737	1	1011011100 (1) 1011001100
25736	1	1011011100 (1) 1010011100
25928	1	0101000110 (1) 0101000010
25927	1	0101000110 (1) 0101100110
25926	1	0101000110 (1) 0001000110
25723	1	0011011100 (1) 0011011110
25722	1	0011011100 (1) 0011001100
25721	1	0011011100 (1) 0010011100
24994	1	1100110001 (1) 1100110101
24993	1	1100110001 (1) 1100111001
24992	1	1100110001 (1) 1100010001
24991	1	1100110001 (1) 1101110001
24990	1	1100110001 (1) 1110110001
24989	1	1100110001 (1) 1000110001
24975	1	0100110001 (1) 0100110101
24974	1	0100110001 (1) 0100111001
24973	1	0100110001 (1) 0100010001
24972	1	0100110001 (1) 0101110001
24971	1	0100110001 (1) 0110110001
24970	1	0100110001 (1) 0000110001
25659	1	0111011100 (1) 0111011110
25658	1	0111011100 (1) 0111001100
25657	1	0111011100 (1) 0111111100
25656	1	0111011100 (1) 0110011100
25655	1	0111011100 (1) 0101011100
25654	1	0111011100 (1) 0011011100
25646	1	1111011100 (1) 1111011110
25645	1	1111011100 (1) 1111001100
25644	1	1111011100 (1) 1111111100
25643	1	1111011100 (1) 1110011100
25642	1	1111011100 (1) 1101011100
25641	1	1111011100 (1) 1011011100
25921	1	1000011010 (1) 1000011110
25920	1	1000011010 (1) 1000010010
25919	1	1000011010 (1) 1000001010
25918	1	1000011010 (1) 1001011010
25913	1	0000011010 (1) 0000011110
25912	1	0000011010 (1) 0000010010
25911	1	0000011010 (1) 0000001010
25910	1	0000011010 (1) 0001011010
24519	1	0001101010 (1) 0001101000
24518	1	0001101010 (1) 0001100010
24517	1	0001101010 (1) 0001111010
24516	1	0001101010 (1) 0001001010
24515	1	0001101010 (1) 0011101010
24497	1	1001101010 (1) 1001101000
24496	1	1001101010 (1) 1001100010
24495	1	1001101010 (1) 1001111010
24494	1	1001101010 (1) 1001001010
24493	1	1001101010 (1) 1011101010
24492	1	1001101010 (1) 1101101010
24726	1	1101101010 (1) 1101101000
24725	1	1101101010 (1) 1101100010
24724	1	1101101010 (1) 1101111010
24723	1	1101101010 (1) 1111101010
25896	1	1100011010 (1) 1100011110
25895	1	1100011010 (1) 1100010010
25894	1	1100011010 (1) 1100001010
25893	1	1100011010 (1) 1101011010
25892	1	1100011010 (1) 1000011010
25604	1	1000111100 (1) 1000011100
25603	1	1000111100 (1) 1001111100
25602	1	1000111100 (1) 1010111100
24401	1	1001001001 (1) 1001001011
24400	1	1001001001 (1) 1001001101
24399	1	1001001001 (1) 1001000001
24398	1	1001001001 (1) 1101001001
25887	1	1011000110 (1) 1011000010
25886	1	1011000110 (1) 1011100110
25885	1	1011000110 (1) 1010000110
25884	1	1011000110 (1) 1111000110
24722	1	0101101010 (1) 0101101000
24721	1	0101101010 (1) 0101100010
24720	1	0101101010 (1) 0101111010
24719	1	0101101010 (1) 0111101010
24718	1	0101101010 (1) 0001101010
25874	1	0100011010 (1) 0100011110
25873	1	0100011010 (1) 0100010010
25872	1	0100011010 (1) 0100001010
25871	1	0100011010 (1) 0101011010
25870	1	0100011010 (1) 0000011010
25601	1	0000111100 (1) 0000011100
25600	1	0000111100 (1) 0001111100
25599	1	0000111100 (1) 0010111100
25865	1	0011000110 (1) 0011000010
25864	1	0011000110 (1) 0011100110
25863	1	0011000110 (1) 0010000110
24382	1	0001001001 (1) 0001001011
24381	1	0001001001 (1) 0001001101
24380	1	0001001001 (1) 0001000001
24893	1	1010110001 (1) 1010110101
24892	1	1010110001 (1) 1010111001
24891	1	1010110001 (1) 1010010001
24898	1	0010110001 (1) 0010110101
24897	1	0010110001 (1) 0010111001
24896	1	0010110001 (1) 0010010001
25598	1	1100111100 (1) 1100011100
25597	1	1100111100 (1) 1101111100
25596	1	1100111100 (1) 1110111100
25595	1	1100111100 (1) 1000111100
25859	1	1111000110 (1) 1111000010
25858	1	1111000110 (1) 1111100110
25857	1	1111000110 (1) 1110000110
25856	1	1111000110 (1) 1101000110
25588	1	0100111100 (1) 0100011100
25587	1	0100111100 (1) 0101111100
25586	1	0100111100 (1) 0110111100
25585	1	0100111100 (1) 0000111100
25846	1	0111000110 (1) 0111000010
25845	1	0111000110 (1) 0111100110
25844	1	0111000110 (1) 0110000110
25843	1	0111000110 (1) 0101000110
25842	1	0111000110 (1) 0011000110
24873	1	1110110001 (1) 1110110101
24872	1	1110110001 (1) 1110111001
24871	1	1110110001 (1) 1110010001
24870	1	1110110001 (1) 1010110001
24366	1	1101001001 (1) 1101001011
24365	1	1101001001 (1) 1101001101
24364	1	1101001001 (1) 1101000001
24363	1	1101001001 (1) 1101101001
24867	1	0110110001 (1) 0110110101
24866	1	0110110001 (1) 0110111001
24865	1	0110110001 (1) 0110010001
24864	1	0110110001 (1) 0010110001
24349	1	0101001001 (1) 0101001011
24348	1	0101001001 (1) 0101001101
24347	1	0101001001 (1) 0101000001
24346	1	0101001001 (1) 0101101001
24345	1	0101001001 (1) 0001001001
25837	1	1010011010 (1) 1010011110
25836	1	1010011010 (1) 1010010010
25835	1	1010011010 (1) 1010001010
25834	1	1010011010 (1) 1000011010
24594	1	1000100110 (1) 1000100100
24593	1	1000100110 (1) 1000100010
24592	1	1000100110 (1) 1000110110
24591	1	1000100110 (1) 1001100110
24590	1	1000100110 (1) 1010100110
24589	1	1000100110 (1) 1100100110
25827	1	0010011010 (1) 0010011110
25826	1	0010011010 (1) 0010010010
25825	1	0010011010 (1) 0010001010
25824	1	0010011010 (1) 0000011010
24588	1	0000100110 (1) 0000100100
24587	1	0000100110 (1) 0000100010
24586	1	0000100110 (1) 0000110110
24585	1	0000100110 (1) 0001100110
24584	1	0000100110 (1) 0010100110
24099	1	0011101010 (1) 0011101000
24098	1	0011101010 (1) 0011100010
24097	1	0011101010 (1) 0011111010
24096	1	0011101010 (1) 0011001010
24095	1	0011101010 (1) 0010101010
24089	1	1011101010 (1) 1011101000
24088	1	1011101010 (1) 1011100010
24087	1	1011101010 (1) 1011111010
24086	1	1011101010 (1) 1011001010
24085	1	1011101010 (1) 1010101010
24084	1	1011101010 (1) 1111101010
25803	1	0110011010 (1) 0110011110
25802	1	0110011010 (1) 0110010010
25801	1	0110011010 (1) 0110001010
25800	1	0110011010 (1) 0100011010
25799	1	0110011010 (1) 0010011010
25499	1	1010111100 (1) 1010011100
25817	1	1110011010 (1) 1110011110
25816	1	1110011010 (1) 1110010010
25815	1	1110011010 (1) 1110001010
25814	1	1110011010 (1) 1100011010
25813	1	1110011010 (1) 1010011010
24583	1	1100100110 (1) 1100100100
24582	1	1100100110 (1) 1100100010
24581	1	1100100110 (1) 1100110110
24580	1	1100100110 (1) 1101100110
24579	1	1100100110 (1) 1110100110
24576	1	1111101010 (1) 1111101000
24575	1	1111101010 (1) 1111100010
24574	1	1111101010 (1) 1111111010
24573	1	1111101010 (1) 1110101010
24572	1	0100100110 (1) 0100100100
24571	1	0100100110 (1) 0100100010
24570	1	0100100110 (1) 0100110110
24569	1	0100100110 (1) 0101100110
24568	1	0100100110 (1) 0110100110
24567	1	0100100110 (1) 0000100110
25490	1	0010111100 (1) 0010011100
23971	1	1011001001 (1) 1011001011
23970	1	1011001001 (1) 1011001101
23969	1	1011001001 (1) 1011000001
23968	1	1011001001 (1) 1010001001
23967	1	1011001001 (1) 1001001001
23966	1	1011001001 (1) 1111001001
25456	1	1000000101 (1) 1000000111
25455	1	1000000101 (1) 1000100101
25454	1	1000000101 (1) 1001000101
25453	1	1000000101 (1) 1010000101
25452	1	1000000101 (1) 1100000101
23946	1	0011001001 (1) 0011001011
23945	1	0011001001 (1) 0011001101
23944	1	0011001001 (1) 0011000001
23943	1	0011001001 (1) 0010001001
23942	1	0011001001 (1) 0001001001
24564	1	0111101010 (1) 0111101000
24563	1	0111101010 (1) 0111100010
24562	1	0111101010 (1) 0111111010
24561	1	0111101010 (1) 0110101010
24560	1	0111101010 (1) 0011101010
25469	1	0000000101 (1) 0000000111
25468	1	0000000101 (1) 0000100101
25467	1	0000000101 (1) 0001000101
25466	1	0000000101 (1) 0010000101
25445	1	1110111100 (1) 1110011100
25444	1	1110111100 (1) 1010111100
25443	1	0110111100 (1) 0110011100
25442	1	0110111100 (1) 0010111100
25439	1	1100000101 (1) 1100000111
25438	1	1100000101 (1) 1100100101
25437	1	1100000101 (1) 1101000101
23956	1	1111001001 (1) 1111001011
23955	1	1111001001 (1) 1111001101
23954	1	1111001001 (1) 1111000001
23953	1	1111001001 (1) 1111101001
23952	1	1111001001 (1) 1110001001
23951	1	1111001001 (1) 1101001001
24806	1	1001110001 (1) 1001110101
24805	1	1001110001 (1) 1001111001
24804	1	1001110001 (1) 1001010001
24803	1	1001110001 (1) 1011110001
25426	1	0100000101 (1) 0100000111
25425	1	0100000101 (1) 0100100101
25424	1	0100000101 (1) 0101000101
25423	1	0100000101 (1) 0000000101
24817	1	0001110001 (1) 0001110101
24816	1	0001110001 (1) 0001111001
24815	1	0001110001 (1) 0001010001
24814	1	0001110001 (1) 0011110001
23897	1	0111001001 (1) 0111001011
23896	1	0111001001 (1) 0111001101
23895	1	0111001001 (1) 0111000001
23894	1	0111001001 (1) 0111101001
23893	1	0111001001 (1) 0110001001
23892	1	0111001001 (1) 0101001001
23891	1	0111001001 (1) 0011001001
24795	1	1101110001 (1) 1101110101
24794	1	1101110001 (1) 1101111001
24793	1	1101110001 (1) 1111110001
24792	1	1101110001 (1) 1001110001
24761	1	0101110001 (1) 0101110101
24760	1	0101110001 (1) 0101111001
24759	1	0101110001 (1) 0111110001
24758	1	0101110001 (1) 0001110001
24452	1	1010100110 (1) 1010100100
24451	1	1010100110 (1) 1010100010
24450	1	1010100110 (1) 1010110110
24449	1	1010100110 (1) 1110100110
24448	1	0010100110 (1) 0010100100
24447	1	0010100110 (1) 0010100010
24446	1	0010100110 (1) 0010110110
23857	1	0000101001 (1) 0000101101
23856	1	0000101001 (1) 0000100001
23855	1	0000101001 (1) 0000111001
23854	1	0000101001 (1) 0000001001
23853	1	0000101001 (1) 0001101001
23852	1	0000101001 (1) 0010101001
23837	1	1000101001 (1) 1000101101
23836	1	1000101001 (1) 1000100001
23835	1	1000101001 (1) 1000111001
23834	1	1000101001 (1) 1000001001
23833	1	1000101001 (1) 1001101001
23832	1	1000101001 (1) 1010101001
23831	1	1000101001 (1) 1100101001
24379	1	1110100110 (1) 1110100100
24378	1	1110100110 (1) 1110100010
24377	1	1110100110 (1) 1110110110
25782	1	1001011010 (1) 1001011110
25781	1	1001011010 (1) 1001010010
25780	1	1001011010 (1) 1001001010
25776	1	0001011010 (1) 0001011110
25775	1	0001011010 (1) 0001010010
25774	1	0001011010 (1) 0001001010
24376	1	0110100110 (1) 0110100100
24375	1	0110100110 (1) 0110100010
24374	1	0110100110 (1) 0110110110
24373	1	0110100110 (1) 0010100110
25322	1	0010000101 (1) 0010000111
25321	1	0010000101 (1) 0010100101
25333	1	1010000101 (1) 1010000111
25332	1	1010000101 (1) 1010100101
25331	1	1010000101 (1) 1110000101
23813	1	1100101001 (1) 1100101101
23812	1	1100101001 (1) 1100100001
23811	1	1100101001 (1) 1100111001
23810	1	1100101001 (1) 1100001001
23809	1	1100101001 (1) 1101101001
23808	1	1100101001 (1) 1110101001
23789	1	0100101001 (1) 0100101101
23788	1	0100101001 (1) 0100100001
23787	1	0100101001 (1) 0100111001
23786	1	0100101001 (1) 0100001001
23785	1	0100101001 (1) 0101101001
23784	1	0100101001 (1) 0110101001
23783	1	0100101001 (1) 0000101001
25313	1	1001111100 (1) 1001011100
25312	1	1001111100 (1) 1011111100
25767	1	1101011010 (1) 1101011110
25766	1	1101011010 (1) 1101010010
25765	1	1101011010 (1) 1101001010
25764	1	1101011010 (1) 1101111010
25763	1	1101011010 (1) 1001011010
25297	1	0001111100 (1) 0001011100
25296	1	0001111100 (1) 0011111100
25758	1	0101011010 (1) 0101011110
25757	1	0101011010 (1) 0101010010
25756	1	0101011010 (1) 0101001010
25755	1	0101011010 (1) 0101111010
25754	1	0101011010 (1) 0001011010
25293	1	1110000101 (1) 1110000111
25292	1	1110000101 (1) 1110100101
25291	1	1110000101 (1) 1100000101
24667	1	1011110001 (1) 1011110101
24666	1	1011110001 (1) 1011111001
24665	1	1011110001 (1) 1011010001
24664	1	1011110001 (1) 1010110001
25283	1	0110000101 (1) 0110000111
25282	1	0110000101 (1) 0110100101
25281	1	0110000101 (1) 0100000101
25280	1	0110000101 (1) 0010000101
24661	1	0011110001 (1) 0011110101
24660	1	0011110001 (1) 0011111001
24659	1	0011110001 (1) 0011010001
24658	1	0011110001 (1) 0010110001
25279	1	1101111100 (1) 1111111100
25278	1	1101111100 (1) 1001111100
25277	1	0101111100 (1) 0111111100
25276	1	0101111100 (1) 0001111100
24626	1	1111110001 (1) 1111110101
24625	1	1111110001 (1) 1111111001
24624	1	1111110001 (1) 1110110001
24623	1	1111110001 (1) 1011110001
24598	1	0111110001 (1) 0111110101
24597	1	0111110001 (1) 0111111001
24596	1	0111110001 (1) 0110110001
24595	1	0111110001 (1) 0011110001
23841	1	0010101001 (1) 0010101101
23840	1	0010101001 (1) 0010100001
23839	1	0010101001 (1) 0010111001
23838	1	0010101001 (1) 0010001001
23818	1	1010101001 (1) 1010101101
23817	1	1010101001 (1) 1010100001
23816	1	1010101001 (1) 1010111001
23815	1	1010101001 (1) 1010001001
23814	1	1010101001 (1) 1110101001
25690	1	1000010110 (1) 1000010010
25689	1	1000010110 (1) 1000000110
25688	1	1000010110 (1) 1000110110
25687	1	1000010110 (1) 1001010110
25686	1	1000010110 (1) 1010010110
24191	1	1001100110 (1) 1001100100
24190	1	1001100110 (1) 1001100010
24189	1	1001100110 (1) 1001110110
24188	1	1001100110 (1) 1011100110
24187	1	1001100110 (1) 1101100110
25743	1	1011011010 (1) 1011011110
25742	1	1011011010 (1) 1011010010
25741	1	1011011010 (1) 1011001010
25740	1	1011011010 (1) 1010011010
25739	1	1011011010 (1) 1001011010
25713	1	0000010110 (1) 0000010010
25712	1	0000010110 (1) 0000000110
25711	1	0000010110 (1) 0000110110
25710	1	0000010110 (1) 0001010110
25709	1	0000010110 (1) 0010010110
24186	1	0001100110 (1) 0001100100
24185	1	0001100110 (1) 0001100010
24184	1	0001100110 (1) 0001110110
24183	1	0001100110 (1) 0011100110
25728	1	0011011010 (1) 0011011110
25727	1	0011011010 (1) 0011010010
25726	1	0011011010 (1) 0011001010
25725	1	0011011010 (1) 0010011010
25724	1	0011011010 (1) 0001011010
23793	1	1110101001 (1) 1110101101
23792	1	1110101001 (1) 1110100001
23791	1	1110101001 (1) 1110111001
23790	1	1110101001 (1) 1110001001
23776	1	0110101001 (1) 0110101101
23775	1	0110101001 (1) 0110100001
23774	1	0110101001 (1) 0110111001
23773	1	0110101001 (1) 0110001001
23772	1	0110101001 (1) 0010101001
25653	1	1111011010 (1) 1111011110
25652	1	1111011010 (1) 1111010010
25651	1	1111011010 (1) 1111001010
25650	1	1111011010 (1) 1111111010
25649	1	1111011010 (1) 1110011010
25648	1	1111011010 (1) 1101011010
25647	1	1111011010 (1) 1011011010
25615	1	1100010110 (1) 1100010010
25614	1	1100010110 (1) 1100000110
25613	1	1100010110 (1) 1100110110
25612	1	1100010110 (1) 1101010110
25611	1	1100010110 (1) 1000010110
24149	1	1101100110 (1) 1101100100
24148	1	1101100110 (1) 1101100010
24147	1	1101100110 (1) 1101110110
24146	1	1101100110 (1) 1111100110
25199	1	1011111100 (1) 1011011100
25198	1	1011111100 (1) 1010111100
25633	1	0100010110 (1) 0100010010
25632	1	0100010110 (1) 0100000110
25631	1	0100010110 (1) 0100110110
25630	1	0100010110 (1) 0101010110
25629	1	0100010110 (1) 0000010110
25203	1	1001000101 (1) 1001000111
25202	1	1001000101 (1) 1001100101
25201	1	1001000101 (1) 1011000101
25200	1	1001000101 (1) 1101000101
24142	1	0101100110 (1) 0101100100
24141	1	0101100110 (1) 0101100010
24140	1	0101100110 (1) 0101110110
24139	1	0101100110 (1) 0111100110
24138	1	0101100110 (1) 0001100110
25185	1	0011111100 (1) 0011011100
25184	1	0011111100 (1) 0010111100
25666	1	0111011010 (1) 0111011110
25665	1	0111011010 (1) 0111010010
25664	1	0111011010 (1) 0111001010
25663	1	0111011010 (1) 0111111010
25662	1	0111011010 (1) 0110011010
25661	1	0111011010 (1) 0101011010
25660	1	0111011010 (1) 0011011010
25208	1	0001000101 (1) 0001000111
25207	1	0001000101 (1) 0001100101
25206	1	0001000101 (1) 0011000101
25183	1	1111111100 (1) 1110111100
25182	1	1111111100 (1) 1011111100
25181	1	0111111100 (1) 0110111100
25180	1	0111111100 (1) 0011111100
25177	1	1101000101 (1) 1101000111
25176	1	1101000101 (1) 1101100101
25169	1	0101000101 (1) 0101000111
[truncated: 2,100 more rows]
