# Supplementary material
Source: publisher figshare collection journal article supplement (https://springernature.figshare.com/ndownloader/files/17562821)
Supplement: Supplementary file 1 [file 17562821 › CytoscapeSession-2018_09_25-21_15/tables/21506-STG%2C+Model+3/SHARED_ATTRS-org.cytoscape.model.CyNode-STG%2C+Model+3+root+shared++node.cytable]

CyCSV-Version	1
SUID	shared name
java.lang.Long	java.lang.String
STG, Model 3 root shared node
22555	0000000000
22554	0000000010
22553	0001000000
22552	1000000000
22551	1000000010
22550	1001000000
22549	1100000000
22548	1100000010
22547	1101000000
22546	0100000000
22545	0100000010
22544	0101000000
22543	1010000000
22542	1010000010
22541	1110000000
22540	0010000000
22539	0010000010
22538	1110000010
22537	0110000000
22536	0110000010
22535	0001000010
22534	1001000010
22533	1101000010
22532	1101100000
22531	0101000010
22530	0101100000
22529	1011000000
22528	1011000010
22527	1111000000
22526	0011000000
22525	0011000010
22524	1111000010
22523	1111100000
22522	0111000000
22521	0111000010
22520	0111100000
22519	1000100000
22518	1000110000
22517	1001100000
22516	1010100000
22515	1100100000
22514	0000100000
22513	0000110000
22512	0001100000
22511	0010100000
22510	1100110000
22509	1110100000
22508	0100100000
22507	0100110000
22506	0110100000
22505	1010110000
22504	0010110000
22503	1110110000
22502	0110110000
22501	1001110000
22500	1011100000
22499	1000010000
22498	1000010010
22497	1000011000
22496	1001010000
22495	0001110000
22494	0011100000
22493	0000010000
22492	0000010010
22491	0000011000
22490	0001010000
22489	1101110000
22488	1100010000
22487	1100010010
22486	1100011000
22485	1101010000
22484	0101110000
22483	0100010000
22482	0100010010
22481	0100011000
22480	0101010000
22479	1011110000
22478	1010010000
22477	1010010010
22476	1010011000
22475	0011110000
22474	0010010000
22473	0010010010
22472	0010011000
22471	1111110000
22470	1110010000
22469	1110010010
22468	1110011000
22467	0111110000
22466	0110010000
22465	0110010010
22464	0110011000
22463	1001010010
22462	1001011000
22461	0001010010
22460	0001011000
22459	1101010010
22458	1101011000
22457	0101010010
22456	0101011000
22455	1000001000
22454	1000001010
22453	1001001000
22452	1100001000
22451	0000001000
22450	0000001010
22449	0001001000
22448	1100001010
22447	1101001000
22446	0100001000
22445	0100001010
22444	0101001000
22443	1011010000
22442	1011010010
22441	1011011000
22440	0011010000
22439	0011010010
22438	0011011000
22437	0111010000
22436	0111010010
22435	0111011000
22434	1111010000
22433	1111010010
22432	1111011000
22431	1010001000
22430	1010001010
22429	1110001000
22428	0010001000
22427	0010001010
22426	1110001010
22425	1000111000
22424	0000111000
22423	0110001000
22422	0110001010
22421	1100111000
22420	0100111000
22419	1010111000
22418	1001001010
22417	0010111000
22416	0001001010
22415	1110111000
22414	1101001010
22413	1101101000
22412	0110111000
22411	0101001010
22410	0101101000
22409	1011001000
22408	1011001010
22407	1111001000
22406	1000000100
22405	1000000110
22404	1000100100
22403	1001000100
22402	1010000100
22401	1100000100
22400	0011001000
22399	0011001010
22398	0000000100
22397	0000000110
22396	0000100100
22395	0001000100
22394	0010000100
22393	1100000110
22392	1100100100
22391	1101000100
22390	1001111000
22389	1111001010
22388	1111101000
22387	0001111000
22386	0100000100
22385	0100000110
22384	0100100100
22383	0101000100
22382	0111001000
22381	0111001010
22380	0111101000
22379	1101111000
22378	0101111000
22377	0000101000
22376	0001101000
22375	0010101000
22374	1000101000
22373	1001101000
22372	1010101000
22371	1100101000
22370	1010000110
22369	1010100100
22368	1110000100
22367	0010000110
22366	0010100100
22365	1110101000
22364	0100101000
22363	0110101000
22362	1110000110
22361	1110100100
22360	1011111000
22359	0011111000
22358	0110000100
22357	0110000110
22356	0110100100
22355	1111111000
22354	0111111000
22353	1001000110
22352	1001100100
22351	1011000100
22350	0001000110
22349	0001100100
22348	0011000100
22347	1101000110
22346	1101100100
22345	0101000110
22344	0101100100
22343	1000011010
22342	1000011100
22341	0000011010
22340	0000011100
22339	0011101000
22338	1011101000
22337	1100011010
22336	1100011100
22335	1011000110
22334	1011100100
22333	1111000100
22332	0100011010
22331	0100011100
22330	0011000110
22329	0011100100
22328	1111000110
22327	1111100100
22326	0111000100
22325	0111000110
22324	0111100100
22323	1010011010
22322	1010011100
22321	1000110100
22320	0010011010
22319	0010011100
22318	0000110100
22317	1110011010
22316	1110011100
22315	1100110100
22314	0110011010
22313	0110011100
22312	0100110100
22311	1010110100
22310	0010110100
22309	1110110100
22308	1001011010
22307	1001011100
22306	0001011010
22305	0001011100
22304	0110110100
22303	1101011010
22302	1101011100
22301	0101011010
22300	0101011100
22299	1101100010
22298	1001110100
22297	1011011010
22296	1011011100
22295	0101100010
22294	0001110100
22293	0011011010
22292	0011011100
22291	0000010100
22290	0000010110
22289	0001010100
22288	0010010100
22287	1000010100
22286	1000010110
22285	1001010100
22284	1010010100
22283	1101110100
22282	0101110100
22281	0111011010
22280	0111011100
22279	1111011010
22278	1111011100
22277	0100010100
22276	0100010110
22275	0101010100
22274	1100010100
22273	1100010110
22272	1101010100
22271	1000111100
22270	0000111100
22269	1100111100
22268	1111100010
22267	1011110100
22266	0100111100
22265	0011110100
22264	0111100010
22263	0010010110
22262	1010010110
22261	1111110100
22260	0111110100
22259	0110010100
22258	0110010110
22257	1110010100
22256	1110010110
22255	1000100010
22254	1000110010
22253	1001100010
22252	1010100010
22251	1100100010
22250	0000100010
22249	0000110010
22248	0001100010
22247	0010100010
22246	1010111100
22245	1100110010
22244	1110100010
22243	0010111100
22242	0100100010
22241	0100110010
22240	0110100010
22239	0000000001
22238	0000000011
22237	0000000101
22236	0001000001
22235	1000000001
22234	1000000011
22233	1000000101
22232	1001000001
22231	1100000001
22230	1110111100
22229	0110111100
22228	1100000011
22227	1100000101
22226	1101000001
22225	0100000001
22224	0100000011
22223	0100000101
22222	0101000001
22221	0001010110
22220	0011010100
22219	1001010110
22218	1011010100
22217	1010110010
22216	0010110010
22215	0101010110
22214	1101010110
22213	1110110010
22212	1000001100
22211	1000001110
22210	1001001100
22209	1010001100
22208	1100001100
22207	0000001100
22206	0000001110
22205	0001001100
22204	0010001100
22203	0110110010
22202	1010000001
22201	1010000011
22200	1010000101
22199	1110000001
22198	0010000001
22197	0010000011
22196	0010000101
22195	1100001110
22194	1101001100
22193	1001111100
22192	0100001100
22191	0100001110
22190	0101001100
22189	0001111100
22188	1110000011
22187	1110000101
22186	0110000001
22185	0110000011
22184	0110000101
22183	1101111100
22182	0101111100
22181	0011010110
22180	1011010110
22179	0111010100
22178	0111010110
22177	1111010100
22176	1111010110
22175	1010001110
22174	1110001100
22173	1001110010
22172	1011100010
22171	0010001110
22170	0001110010
22169	0011100010
22168	1110001110
22167	1101110010
22166	0001000011
22165	0001000101
22164	1001000011
22163	1001000101
22162	1011111100
22161	0101110010
22160	0110001100
22159	0110001110
22158	0011111100
22157	1111111100
22156	0111111100
22155	1101000011
22154	1101000101
22153	1101100001
22152	0101000011
22151	0101000101
22150	0101100001
22149	1011110010
22148	0011110010
22147	0011000001
22146	0011000011
22145	0011000101
22144	1111110010
22143	1001001110
22142	1011001100
22141	0001001110
22140	0011001100
22139	0111110010
22138	1011000001
22137	1011000011
22136	1011000101
22135	1111000001
22134	1101001110
22133	1101101100
22132	0101001110
22131	0101101100
22130	1111000011
22129	1111000101
22128	1111100001
22127	0111000001
22126	0111000011
22125	0111000101
22124	0111100001
22123	0000100001
22122	0000100101
22121	0000110001
22120	0001100001
22119	0010100001
22118	1000100001
22117	1000100101
22116	1000110001
22115	1001100001
22114	1010100001
22113	1100100001
22112	1011001110
22111	1111001100
22110	0011001110
22109	1100100101
22108	1100110001
22107	1110100001
22106	0100100001
22105	0100100101
22104	0100110001
22103	0110100001
22102	1111001110
22101	1111101100
22100	0111001100
22099	0111001110
22098	0111101100
22097	0000101100
22096	0001101100
22095	0010101100
22094	1000101100
22093	1001101100
22092	1010101100
22091	1100101100
22090	0010100101
22089	0010110001
22088	1010100101
22087	1010110001
22086	1110101100
22085	0100101100
22084	0110101100
22083	1110100101
22082	1110110001
22081	0110100101
22080	0110110001
22079	1000010001
22078	1000010011
22077	1000010101
22076	1000011001
22075	1001010001
22074	0000010001
22073	0000010011
22072	0000010101
22071	0000011001
22070	0001010001
22069	0001100101
22068	0001110001
22067	0011100001
22066	1001100101
22065	1001110001
22064	1011100001
22063	1101100101
22062	1101110001
22061	1100010001
22060	1100010011
22059	1100010101
22058	1100011001
22057	1101010001
22056	0101100101
22055	0101110001
22054	0100010001
22053	0100010011
22052	0100010101
22051	0100011001
22050	0101010001
22049	1000011110
22048	1101101010
22047	0101101010
22046	0000011110
22045	0011101100
22044	1011101100
22043	1010010001
22042	1010010011
22041	1010010101
22040	1010011001
22039	0010010001
22038	0010010011
22037	0010010101
22036	0010011001
22035	1011100101
22034	1011110001
22033	0011100101
22032	0011110001
22031	1100011110
22030	0100011110
22029	1110010001
22028	1110010011
22027	1110010101
22026	1110011001
22025	1111100101
22024	1111110001
22023	0110010001
22022	0110010011
22021	0110010101
22020	0110011001
22019	0111100101
22018	0111110001
22017	1000100110
22016	0000100110
22015	1100100110
22014	1010011110
22013	1111101010
22012	0100100110
22011	0010011110
22010	0111101010
22009	1110011110
22008	0110011110
22007	1001010011
22006	1001010101
22005	1001011001
22004	0001010011
22003	0001010101
22002	0001011001
22001	0000101010
22000	0000111010
21999	0001101010
21998	0010101010
21997	1000101010
21996	1000111010
21995	1001101010
21994	1010101010
21993	1100101010
21992	1101010011
21991	1101010101
21990	1101011001
21989	0101010011
21988	0101010101
21987	0101011001
21986	1010100110
21985	0010100110
21984	1100111010
21983	1110101010
21982	0100101010
21981	0100111010
21980	0110101010
21979	1000001001
21978	1000001011
21977	1000001101
21976	1001001001
21975	1100001001
21974	0000001001
21973	0000001011
21972	0000001101
21971	0001001001
21970	1110100110
21969	0110100110
21968	1100001011
21967	1100001101
21966	1101001001
21965	0100001001
21964	0100001011
21963	0100001101
21962	0101001001
21961	1001011110
21960	0001011110
21959	1011010001
21958	1011010011
21957	1011010101
21956	1011011001
21955	0011010001
21954	0011010011
21953	0011010101
21952	0011011001
21951	1101011110
21950	0010111010
21949	0101011110
21948	1010111010
21947	0111010001
21946	0111010011
21945	0111010101
21944	0111011001
21943	1111010001
21942	1111010011
21941	1111010101
21940	1111011001
21939	1110111010
21938	0110111010
21937	1010001001
21936	1010001011
21935	1010001101
21934	1110001001
21933	0010001001
21932	0010001011
21931	0010001101
21930	1001100110
21929	0001100110
21928	1110001011
21927	1110001101
21926	0110001001
21925	0110001011
21924	0110001101
21923	0000110101
21922	0000111001
21921	1000110101
21920	1000111001
21919	1101100110
21918	1011011110
21917	0101100110
21916	0011011110
21915	1100110101
21914	1100111001
21913	0100110101
21912	0100111001
21911	0111011110
21910	1111011110
21909	0001111010
21908	0011101010
21907	1001111010
21906	1011101010
21905	1101111010
21904	1001001011
21903	1001001101
21902	1011100110
21901	0101111010
21900	0011100110
21899	0001001011
21898	0001001101
21897	1010110101
21896	1010111001
21895	0010110101
21894	0010111001
21893	1111100110
21892	0111100110
21891	1110110101
21890	1110111001
21889	1101001011
21888	1101001101
21887	1101101001
21886	0110110101
21885	0110111001
21884	0101001011
21883	0101001101
21882	0101101001
21881	1000110110
21880	0000110110
21879	0011111010
21878	1011111010
21877	1100110110
21876	1111111010
21875	0100110110
21874	1011001001
21873	1011001011
21872	1011001101
21871	1111001001
21870	1000000111
21869	0011001001
21868	0011001011
21867	0011001101
21866	0111111010
21865	0000000111
21864	1100000111
21863	1111001011
21862	1111001101
21861	1111101001
21860	1001110101
21859	1001111001
21858	0100000111
21857	0001110101
21856	0001111001
21855	0111001001
21854	0111001011
21853	0111001101
21852	0111101001
21851	1101110101
21850	1101111001
21849	0101110101
21848	0101111001
21847	1010110110
21846	0010110110
21845	0000101001
21844	0000101101
21843	0001101001
21842	0010101001
21841	1000101001
21840	1000101101
21839	1001101001
21838	1010101001
21837	1100101001
21836	1110110110
21835	0110110110
21834	0010000111
21833	1010000111
21832	1100101101
21831	1110101001
21830	0100101001
21829	0100101101
21828	0110101001
21827	1110000111
21826	1011110101
21825	1011111001
21824	0110000111
21823	0011110101
21822	0011111001
21821	1111110101
21820	1111111001
21819	0111110101
21818	0111111001
21817	0010101101
21816	1010101101
21815	1001110110
21814	0001110110
21813	1110101101
21812	0110101101
21811	1101110110
21810	1001000111
21809	0101110110
21808	0001000111
21807	1101000111
21806	0101000111
21805	0000111110
21804	1000111110
21803	0000011011
21802	0000011101
21801	1011110110
21800	0011110110
21799	1100111110
21798	0100111110
21797	1000011011
21796	1000011101
21795	0001101101
21794	0011101001
21793	1001101101
21792	1011101001
21791	1111110110
21790	0111110110
21789	0011000111
21788	1011000111
21787	1100011011
21786	1100011101
21785	1101101101
21784	0101101101
21783	0100011011
21782	0100011101
21781	1111000111
21780	0111000111
21779	1010111110
21778	0010111110
21777	0110111110
21776	1110111110
21775	1011101101
21774	1010011011
21773	1010011101
21772	0010011011
21771	0010011101
21770	0011101101
21769	1110011011
21768	1110011101
21767	1111101101
21766	0110011011
21765	0110011101
21764	0111101101
21763	1001111110
21762	0001111110
21761	1101111110
21760	0101111110
21759	1001011011
21758	1001011101
21757	0001011011
21756	0001011101
21755	1101011011
21754	1101011101
21753	0101011011
21752	0101011101
21751	1011111110
21750	0011111110
21749	1111111110
21748	0111111110
21747	0000010111
21746	1101100011
21745	0101100011
21744	1000010111
21743	1011011011
21742	1011011101
21741	0011011011
21740	0011011101
21739	1100010111
21738	0100010111
21737	0111011011
21736	0111011101
21735	1111011011
21734	1111011101
21733	0000111101
21732	1000111101
21731	1101101110
21730	0101101110
21729	0100111101
21728	1100111101
21727	0111100011
21726	1010010111
21725	1111100011
21724	0010010111
21723	1110010111
21722	0110010111
21721	0000100011
21720	0000100111
21719	0000110011
21718	0001100011
21717	0010100011
21716	1000100011
21715	1000100111
21714	1000110011
21713	1001100011
21712	1010100011
21711	1100100011
21710	1010111101
21709	0010111101
21708	1100100111
21707	1100110011
21706	1110100011
21705	0100100011
21704	0100100111
21703	0100110011
21702	0110100011
21701	1111101110
21700	0111101110
21699	1110111101
21698	0110111101
21697	1001010111
21696	0001010111
21695	0000101110
21694	0001101110
21693	0010101110
21692	1000101110
21691	1001101110
21690	1010101110
21689	1100101110
21688	1101010111
21687	0101010111
21686	0010100111
21685	0010110011
21684	1010100111
21683	1010110011
21682	1110101110
21681	0100101110
21680	0110101110
21679	0000001111
21678	1000001111
21677	1110100111
21676	1110110011
21675	0110100111
21674	0110110011
21673	1100001111
21672	1001111101
21671	0100001111
21670	0001111101
21669	1101111101
21668	1011010111
21667	0101111101
21666	0011010111
21665	0111010111
21664	1111010111
21663	0010001111
21662	1010001111
21661	0001100111
21660	0001110011
21659	0011100011
21658	1001100111
21657	1001110011
21656	1011100011
21655	1110001111
21654	1101100111
21653	1101110011
21652	1011111101
21651	0110001111
21650	0101100111
21649	0101110011
21648	0011111101
21647	1111111101
21646	0111111101
21645	0011101110
21644	1011101110
21643	0011100111
21642	0011110011
21641	1011100111
21640	1011110011
21639	0001001111
21638	1001001111
21637	1111100111
21636	1111110011
21635	0111100111
21634	0111110011
21633	1101001111
21632	0101001111
21631	0011001111
21630	1011001111
21629	1111001111
21628	0111001111
21627	0000110111
21626	1000110111
21625	1100110111
21624	0100110111
21623	1010110111
21622	0010110111
21621	0000011111
21620	1000011111
21619	1101101011
21618	1110110111
21617	0101101011
21616	0110110111
21615	1100011111
21614	0100011111
21613	0010011111
21612	1010011111
21611	1111101011
21610	1001110111
21609	0001110111
21608	0111101011
21607	1110011111
21606	1101110111
21605	0110011111
21604	0101110111
21603	0000101011
21602	0000101111
21601	0000111011
21600	0001101011
21599	0010101011
21598	1000101011
21597	1000101111
21596	1000111011
21595	1001101011
21594	1010101011
21593	1100101011
21592	1100101111
21591	1100111011
21590	1110101011
21589	0100101011
21588	0100101111
21587	0100111011
21586	0110101011
21585	1011110111
21584	0011110111
21583	0001011111
21582	1001011111
21581	1111110111
21580	0111110111
21579	1101011111
21578	0101011111
21577	0010101111
21576	0010111011
21575	1010101111
21574	1010111011
21573	1110101111
21572	1110111011
21571	0110101111
21570	0110111011
21569	0011011111
21568	1011011111
21567	0111011111
21566	1111011111
21565	0001101111
21564	0001111011
21563	0011101011
21562	1001101111
21561	1001111011
21560	1011101011
21559	1101101111
21558	1101111011
21557	0101101111
21556	0101111011
21555	0011101111
21554	0011111011
21553	1011101111
21552	1011111011
21551	1111101111
21550	1111111011
21549	0111101111
21548	0111111011
21547	0000111111
21546	1000111111
21545	1100111111
21544	0100111111
21543	1010111111
21542	0010111111
21541	1110111111
21540	0110111111
21539	1001111111
21538	0001111111
21537	1101111111
21536	0101111111
21535	1011111111
21534	0011111111
21533	1111111111
21532	0111111111
