# Supplementary material
Source: publisher figshare collection journal article supplement (https://springernature.figshare.com/ndownloader/files/17562821)
Supplement: Supplementary file 1 [file 17562821 › CytoscapeSession-2018_09_25-21_15/tables/21522-STG%2C+Model+3/LOCAL_ATTRS-org.cytoscape.model.CyEdge-STG%2C+Model+3+default++edge.cytable]

CyCSV-Version	1
SUID	interaction	name	selected
java.lang.Long	java.lang.String	java.lang.String	java.lang.Boolean
STG, Model 3 default edge
22556	1	0111111111 (1) 0011111111	false
22557	1	0111111111 (1) 0110111111	false
22558	1	0111111111 (1) 0111110111	false
22559	1	0111111111 (1) 0111111101	false
22560	1	1111111111 (1) 1011111111	false
22561	1	1111111111 (1) 1110111111	false
22562	1	1111111111 (1) 1111110111	false
22563	1	1111111111 (1) 1111111101	false
22564	1	0011111111 (1) 0010111111	false
22565	1	0011111111 (1) 0011011111	false
22566	1	0011111111 (1) 0011110111	false
22567	1	0011111111 (1) 0011111101	false
22568	1	1011111111 (1) 1010111111	false
22569	1	1011111111 (1) 1011011111	false
22570	1	1011111111 (1) 1011110111	false
22571	1	1011111111 (1) 1011111101	false
22572	1	0101111111 (1) 0001111111	false
22573	1	0101111111 (1) 0111111111	false
22574	1	0101111111 (1) 0101110111	false
22575	1	0101111111 (1) 0101111101	false
22576	1	1101111111 (1) 1001111111	false
22577	1	1101111111 (1) 1111111111	false
22578	1	1101111111 (1) 1101110111	false
22579	1	1101111111 (1) 1101111101	false
22580	1	0001111111 (1) 0011111111	false
22581	1	0001111111 (1) 0001011111	false
22582	1	0001111111 (1) 0001110111	false
22583	1	0001111111 (1) 0001111101	false
22584	1	1001111111 (1) 1011111111	false
22585	1	1001111111 (1) 1001011111	false
22586	1	1001111111 (1) 1001110111	false
22587	1	1001111111 (1) 1001111101	false
22588	1	0110111111 (1) 0010111111	false
22589	1	0110111111 (1) 0110011111	false
22590	1	0110111111 (1) 0110110111	false
22591	1	0110111111 (1) 0110111101	false
22592	1	1110111111 (1) 1010111111	false
22593	1	1110111111 (1) 1110011111	false
22594	1	1110111111 (1) 1110110111	false
22595	1	1110111111 (1) 1110111101	false
22596	1	0010111111 (1) 0010011111	false
22597	1	0010111111 (1) 0010110111	false
22598	1	0010111111 (1) 0010111101	false
22599	1	1010111111 (1) 1010011111	false
22600	1	1010111111 (1) 1010110111	false
22601	1	1010111111 (1) 1010111101	false
22602	1	0100111111 (1) 0000111111	false
22603	1	0100111111 (1) 0110111111	false
22604	1	0100111111 (1) 0101111111	false
22605	1	0100111111 (1) 0100011111	false
22606	1	0100111111 (1) 0100110111	false
22607	1	0100111111 (1) 0100111101	false
22608	1	1100111111 (1) 1000111111	false
22609	1	1100111111 (1) 1110111111	false
22610	1	1100111111 (1) 1101111111	false
22611	1	1100111111 (1) 1100011111	false
22612	1	1100111111 (1) 1100110111	false
22613	1	1100111111 (1) 1100111101	false
22614	1	1000111111 (1) 1010111111	false
22615	1	1000111111 (1) 1001111111	false
22616	1	1000111111 (1) 1000011111	false
22617	1	1000111111 (1) 1000110111	false
22618	1	1000111111 (1) 1000111101	false
22619	1	0000111111 (1) 0010111111	false
22620	1	0000111111 (1) 0001111111	false
22621	1	0000111111 (1) 0000011111	false
22622	1	0000111111 (1) 0000110111	false
22623	1	0000111111 (1) 0000111101	false
22624	1	0111111011 (1) 0011111011	false
22625	1	0111111011 (1) 0110111011	false
22626	1	0111111011 (1) 0111110011	false
22627	1	0111111011 (1) 0111111111	false
22628	1	0111111011 (1) 0111111001	false
22629	1	0111101111 (1) 0011101111	false
22630	1	0111101111 (1) 0110101111	false
22631	1	0111101111 (1) 0111111111	false
22632	1	0111101111 (1) 0111100111	false
22633	1	0111101111 (1) 0111101101	false
22634	1	1111111011 (1) 1011111011	false
22635	1	1111111011 (1) 1110111011	false
22636	1	1111111011 (1) 1111110011	false
22637	1	1111111011 (1) 1111111111	false
22638	1	1111111011 (1) 1111111001	false
22639	1	1111101111 (1) 1110101111	false
22640	1	1111101111 (1) 1111111111	false
22641	1	1111101111 (1) 1111100111	false
22642	1	1111101111 (1) 1111101101	false
22643	1	1011111011 (1) 1010111011	false
22644	1	1011111011 (1) 1011011011	false
22645	1	1011111011 (1) 1011110011	false
22646	1	1011111011 (1) 1011111111	false
22647	1	1011111011 (1) 1011111001	false
22648	1	1011101111 (1) 1111101111	false
22649	1	1011101111 (1) 1010101111	false
22650	1	1011101111 (1) 1011001111	false
22651	1	1011101111 (1) 1011111111	false
22652	1	1011101111 (1) 1011100111	false
22653	1	1011101111 (1) 1011101101	false
22654	1	0011111011 (1) 0010111011	false
22655	1	0011111011 (1) 0011011011	false
22656	1	0011111011 (1) 0011110011	false
22657	1	0011111011 (1) 0011111111	false
22658	1	0011111011 (1) 0011111001	false
22659	1	0011101111 (1) 0010101111	false
22660	1	0011101111 (1) 0011001111	false
22661	1	0011101111 (1) 0011111111	false
22662	1	0011101111 (1) 0011100111	false
22663	1	0011101111 (1) 0011101101	false
22664	1	0101111011 (1) 0001111011	false
22665	1	0101111011 (1) 0111111011	false
22666	1	0101111011 (1) 0101110011	false
22667	1	0101111011 (1) 0101111111	false
22668	1	0101111011 (1) 0101111001	false
22669	1	0101101111 (1) 0001101111	false
22670	1	0101101111 (1) 0111101111	false
22671	1	0101101111 (1) 0101111111	false
22672	1	0101101111 (1) 0101100111	false
22673	1	0101101111 (1) 0101101101	false
22674	1	1101111011 (1) 1001111011	false
22675	1	1101111011 (1) 1111111011	false
22676	1	1101111011 (1) 1101110011	false
22677	1	1101111011 (1) 1101111111	false
22678	1	1101111011 (1) 1101111001	false
22679	1	1101101111 (1) 1111101111	false
22680	1	1101101111 (1) 1101111111	false
22681	1	1101101111 (1) 1101100111	false
22682	1	1101101111 (1) 1101101101	false
22683	1	1011101011 (1) 1111101011	false
22684	1	1011101011 (1) 1010101011	false
22685	1	1011101011 (1) 1011001011	false
22686	1	1011101011 (1) 1011111011	false
22687	1	1011101011 (1) 1011100011	false
22688	1	1011101011 (1) 1011101111	false
22689	1	1011101011 (1) 1011101001	false
22690	1	1001111011 (1) 1011111011	false
22691	1	1001111011 (1) 1001011011	false
22692	1	1001111011 (1) 1001110011	false
22693	1	1001111011 (1) 1001111111	false
22694	1	1001111011 (1) 1001111001	false
22695	1	1001101111 (1) 1101101111	false
22696	1	1001101111 (1) 1011101111	false
22697	1	1001101111 (1) 1001001111	false
22698	1	1001101111 (1) 1001111111	false
22699	1	1001101111 (1) 1001100111	false
22700	1	1001101111 (1) 1001101101	false
22701	1	0011101011 (1) 0010101011	false
22702	1	0011101011 (1) 0011001011	false
22703	1	0011101011 (1) 0011111011	false
22704	1	0011101011 (1) 0011100011	false
22705	1	0011101011 (1) 0011101111	false
22706	1	0011101011 (1) 0011101001	false
22707	1	0001111011 (1) 0011111011	false
22708	1	0001111011 (1) 0001011011	false
22709	1	0001111011 (1) 0001110011	false
22710	1	0001111011 (1) 0001111111	false
22711	1	0001111011 (1) 0001111001	false
22712	1	0001101111 (1) 0011101111	false
22713	1	0001101111 (1) 0001001111	false
22714	1	0001101111 (1) 0001111111	false
22715	1	0001101111 (1) 0001100111	false
22716	1	0001101111 (1) 0001101101	false
22717	1	1111011111 (1) 1011011111	false
22718	1	1111011111 (1) 1101011111	false
22719	1	1111011111 (1) 1110011111	false
22720	1	1111011111 (1) 1111111111	false
22721	1	1111011111 (1) 1111001111	false
22722	1	1111011111 (1) 1111010111	false
22723	1	0111011111 (1) 0011011111	false
22724	1	0111011111 (1) 0101011111	false
22725	1	0111011111 (1) 0110011111	false
22726	1	0111011111 (1) 0111111111	false
22727	1	0111011111 (1) 0111001111	false
22728	1	0111011111 (1) 0111010111	false
22729	1	1011011111 (1) 1010011111	false
22730	1	1011011111 (1) 1011001111	false
22731	1	1011011111 (1) 1011010111	false
22732	1	0011011111 (1) 0010011111	false
22733	1	0011011111 (1) 0011001111	false
22734	1	0011011111 (1) 0011010111	false
22735	1	0110111011 (1) 0010111011	false
22736	1	0110111011 (1) 0110011011	false
22737	1	0110111011 (1) 0110110011	false
22738	1	0110111011 (1) 0110111111	false
22739	1	0110111011 (1) 0110111001	false
22740	1	0110101111 (1) 0010101111	false
22741	1	0110101111 (1) 0110001111	false
22742	1	0110101111 (1) 0110111111	false
22743	1	0110101111 (1) 0110100111	false
22744	1	0110101111 (1) 0110101101	false
22745	1	1110111011 (1) 1010111011	false
22746	1	1110111011 (1) 1110011011	false
22747	1	1110111011 (1) 1110110011	false
22748	1	1110111011 (1) 1110111111	false
22749	1	1110111011 (1) 1110111001	false
22750	1	1110101111 (1) 1110001111	false
22751	1	1110101111 (1) 1110111111	false
22752	1	1110101111 (1) 1110100111	false
22753	1	1110101111 (1) 1110101101	false
22754	1	1010111011 (1) 1010011011	false
22755	1	1010111011 (1) 1010110011	false
22756	1	1010111011 (1) 1010111111	false
22757	1	1010111011 (1) 1010111001	false
22758	1	1010101111 (1) 1110101111	false
22759	1	1010101111 (1) 1010001111	false
22760	1	1010101111 (1) 1010111111	false
22761	1	1010101111 (1) 1010100111	false
22762	1	1010101111 (1) 1010101101	false
22763	1	0010111011 (1) 0010011011	false
22764	1	0010111011 (1) 0010110011	false
22765	1	0010111011 (1) 0010111111	false
22766	1	0010111011 (1) 0010111001	false
22767	1	0010101111 (1) 0010001111	false
22768	1	0010101111 (1) 0010111111	false
22769	1	0010101111 (1) 0010100111	false
22770	1	0010101111 (1) 0010101101	false
22771	1	0101011111 (1) 0001011111	false
22772	1	0101011111 (1) 0101111111	false
22773	1	0101011111 (1) 0101001111	false
22774	1	0101011111 (1) 0101010111	false
22775	1	1101011111 (1) 1001011111	false
22776	1	1101011111 (1) 1101111111	false
22777	1	1101011111 (1) 1101001111	false
22778	1	1101011111 (1) 1101010111	false
22779	1	0111110111 (1) 0011110111	false
22780	1	0111110111 (1) 0110110111	false
22781	1	0111110111 (1) 0111110101	false
22782	1	1111110111 (1) 1011110111	false
22783	1	1111110111 (1) 1110110111	false
22784	1	1111110111 (1) 1111110101	false
22785	1	1001011111 (1) 1011011111	false
22786	1	1001011111 (1) 1001001111	false
22787	1	1001011111 (1) 1001010111	false
22788	1	0001011111 (1) 0011011111	false
22789	1	0001011111 (1) 0001001111	false
22790	1	0001011111 (1) 0001010111	false
22791	1	0011110111 (1) 0010110111	false
22792	1	0011110111 (1) 0011110101	false
22793	1	1011110111 (1) 1010110111	false
22794	1	1011110111 (1) 1011110101	false
22795	1	0110101011 (1) 0010101011	false
22796	1	0110101011 (1) 0110001011	false
22797	1	0110101011 (1) 0110111011	false
22798	1	0110101011 (1) 0110100011	false
22799	1	0110101011 (1) 0110101111	false
22800	1	0110101011 (1) 0110101001	false
22801	1	0100111011 (1) 0000111011	false
22802	1	0100111011 (1) 0110111011	false
22803	1	0100111011 (1) 0101111011	false
22804	1	0100111011 (1) 0100011011	false
22805	1	0100111011 (1) 0100110011	false
22806	1	0100111011 (1) 0100111111	false
22807	1	0100111011 (1) 0100111001	false
22808	1	0100101111 (1) 0000101111	false
22809	1	0100101111 (1) 0110101111	false
22810	1	0100101111 (1) 0101101111	false
22811	1	0100101111 (1) 0100001111	false
22812	1	0100101111 (1) 0100111111	false
22813	1	0100101111 (1) 0100100111	false
22814	1	0100101111 (1) 0100101101	false
22815	1	0100101011 (1) 0000101011	false
22816	1	0100101011 (1) 0110101011	false
22817	1	0100101011 (1) 0101101011	false
22818	1	0100101011 (1) 0100001011	false
22819	1	0100101011 (1) 0100111011	false
22820	1	0100101011 (1) 0100100011	false
22821	1	0100101011 (1) 0100101111	false
22822	1	0100101011 (1) 0100101001	false
22823	1	1110101011 (1) 1110001011	false
22824	1	1110101011 (1) 1110111011	false
22825	1	1110101011 (1) 1110100011	false
22826	1	1110101011 (1) 1110101111	false
22827	1	1110101011 (1) 1110101001	false
22828	1	1100111011 (1) 1000111011	false
22829	1	1100111011 (1) 1110111011	false
22830	1	1100111011 (1) 1101111011	false
22831	1	1100111011 (1) 1100011011	false
22832	1	1100111011 (1) 1100110011	false
22833	1	1100111011 (1) 1100111111	false
22834	1	1100111011 (1) 1100111001	false
22835	1	1100101111 (1) 1110101111	false
22836	1	1100101111 (1) 1101101111	false
22837	1	1100101111 (1) 1100001111	false
22838	1	1100101111 (1) 1100111111	false
22839	1	1100101111 (1) 1100100111	false
22840	1	1100101111 (1) 1100101101	false
22841	1	1100101011 (1) 1110101011	false
22842	1	1100101011 (1) 1101101011	false
22843	1	1100101011 (1) 1100001011	false
22844	1	1100101011 (1) 1100111011	false
22845	1	1100101011 (1) 1100100011	false
22846	1	1100101011 (1) 1100101111	false
22847	1	1100101011 (1) 1100101001	false
22848	1	1010101011 (1) 1110101011	false
22849	1	1010101011 (1) 1010001011	false
22850	1	1010101011 (1) 1010111011	false
22851	1	1010101011 (1) 1010100011	false
22852	1	1010101011 (1) 1010101111	false
22853	1	1010101011 (1) 1010101001	false
22854	1	1001101011 (1) 1101101011	false
22855	1	1001101011 (1) 1011101011	false
22856	1	1001101011 (1) 1001001011	false
22857	1	1001101011 (1) 1001111011	false
22858	1	1001101011 (1) 1001100011	false
22859	1	1001101011 (1) 1001101111	false
22860	1	1001101011 (1) 1001101001	false
22861	1	1000111011 (1) 1010111011	false
22862	1	1000111011 (1) 1001111011	false
22863	1	1000111011 (1) 1000011011	false
22864	1	1000111011 (1) 1000110011	false
22865	1	1000111011 (1) 1000111111	false
22866	1	1000111011 (1) 1000111001	false
22867	1	1000101111 (1) 1100101111	false
22868	1	1000101111 (1) 1010101111	false
22869	1	1000101111 (1) 1001101111	false
22870	1	1000101111 (1) 1000001111	false
22871	1	1000101111 (1) 1000111111	false
22872	1	1000101111 (1) 1000100111	false
22873	1	1000101111 (1) 1000101101	false
22874	1	1000101011 (1) 1100101011	false
22875	1	1000101011 (1) 1010101011	false
22876	1	1000101011 (1) 1001101011	false
22877	1	1000101011 (1) 1000001011	false
22878	1	1000101011 (1) 1000111011	false
22879	1	1000101011 (1) 1000100011	false
22880	1	1000101011 (1) 1000101111	false
22881	1	1000101011 (1) 1000101001	false
22882	1	0010101011 (1) 0010001011	false
22883	1	0010101011 (1) 0010111011	false
22884	1	0010101011 (1) 0010100011	false
22885	1	0010101011 (1) 0010101111	false
22886	1	0010101011 (1) 0010101001	false
22887	1	0001101011 (1) 0011101011	false
22888	1	0001101011 (1) 0001001011	false
22889	1	0001101011 (1) 0001111011	false
22890	1	0001101011 (1) 0001100011	false
22891	1	0001101011 (1) 0001101111	false
22892	1	0001101011 (1) 0001101001	false
22893	1	0000111011 (1) 0010111011	false
22894	1	0000111011 (1) 0001111011	false
22895	1	0000111011 (1) 0000011011	false
22896	1	0000111011 (1) 0000110011	false
22897	1	0000111011 (1) 0000111111	false
22898	1	0000111011 (1) 0000111001	false
22899	1	0000101111 (1) 0010101111	false
22900	1	0000101111 (1) 0001101111	false
22901	1	0000101111 (1) 0000001111	false
22902	1	0000101111 (1) 0000111111	false
22903	1	0000101111 (1) 0000100111	false
22904	1	0000101111 (1) 0000101101	false
22905	1	0000101011 (1) 0010101011	false
22906	1	0000101011 (1) 0001101011	false
22907	1	0000101011 (1) 0000001011	false
22908	1	0000101011 (1) 0000111011	false
22909	1	0000101011 (1) 0000100011	false
22910	1	0000101011 (1) 0000101111	false
22911	1	0000101011 (1) 0000101001	false
22912	1	0101110111 (1) 0001110111	false
22913	1	0101110111 (1) 0111110111	false
22914	1	0101110111 (1) 0101110101	false
22915	1	0110011111 (1) 0010011111	false
22916	1	0110011111 (1) 0100011111	false
22917	1	0110011111 (1) 0110001111	false
22918	1	0110011111 (1) 0110010111	false
22919	1	1101110111 (1) 1001110111	false
22920	1	1101110111 (1) 1111110111	false
22921	1	1101110111 (1) 1101110101	false
22922	1	1110011111 (1) 1010011111	false
22923	1	1110011111 (1) 1100011111	false
22924	1	1110011111 (1) 1110001111	false
22925	1	1110011111 (1) 1110010111	false
22926	1	0111101011 (1) 0011101011	false
22927	1	0111101011 (1) 0110101011	false
22928	1	0111101011 (1) 0111111011	false
22929	1	0111101011 (1) 0111100011	false
22930	1	0111101011 (1) 0111101111	false
22931	1	0111101011 (1) 0111101001	false
22932	1	0001110111 (1) 0011110111	false
22933	1	0001110111 (1) 0001110101	false
22934	1	1001110111 (1) 1011110111	false
22935	1	1001110111 (1) 1001110101	false
22936	1	1111101011 (1) 1110101011	false
22937	1	1111101011 (1) 1111111011	false
22938	1	1111101011 (1) 1111100011	false
22939	1	1111101011 (1) 1111101111	false
22940	1	1111101011 (1) 1111101001	false
22941	1	1010011111 (1) 1010001111	false
22942	1	1010011111 (1) 1010010111	false
22943	1	0010011111 (1) 0010001111	false
22944	1	0010011111 (1) 0010010111	false
22945	1	0100011111 (1) 0000011111	false
22946	1	0100011111 (1) 0101011111	false
22947	1	0100011111 (1) 0100001111	false
22948	1	0100011111 (1) 0100010111	false
22949	1	1100011111 (1) 1000011111	false
22950	1	1100011111 (1) 1101011111	false
22951	1	1100011111 (1) 1100001111	false
22952	1	1100011111 (1) 1100010111	false
22953	1	0110110111 (1) 0010110111	false
22954	1	0110110111 (1) 0110110101	false
22955	1	0101101011 (1) 0001101011	false
22956	1	0101101011 (1) 0111101011	false
22957	1	0101101011 (1) 0101111011	false
22958	1	0101101011 (1) 0101100011	false
22959	1	0101101011 (1) 0101101111	false
22960	1	0101101011 (1) 0101101001	false
22961	1	1110110111 (1) 1010110111	false
22962	1	1110110111 (1) 1110110101	false
22963	1	1101101011 (1) 1111101011	false
22964	1	1101101011 (1) 1101111011	false
22965	1	1101101011 (1) 1101100011	false
22966	1	1101101011 (1) 1101101111	false
22967	1	1101101011 (1) 1101101001	false
22968	1	1000011111 (1) 1010011111	false
22969	1	1000011111 (1) 1001011111	false
22970	1	1000011111 (1) 1000001111	false
22971	1	1000011111 (1) 1000010111	false
22972	1	0000011111 (1) 0010011111	false
22973	1	0000011111 (1) 0001011111	false
22974	1	0000011111 (1) 0000001111	false
22975	1	0000011111 (1) 0000010111	false
22976	1	0010110111 (1) 0010110101	false
22977	1	1010110111 (1) 1010110101	false
22978	1	0100110111 (1) 0000110111	false
22979	1	0100110111 (1) 0110110111	false
22980	1	0100110111 (1) 0101110111	false
22981	1	0100110111 (1) 0100110101	false
22982	1	1100110111 (1) 1000110111	false
22983	1	1100110111 (1) 1110110111	false
22984	1	1100110111 (1) 1101110111	false
22985	1	1100110111 (1) 1100110101	false
22986	1	1000110111 (1) 1010110111	false
22987	1	1000110111 (1) 1001110111	false
22988	1	1000110111 (1) 1000110101	false
22989	1	0000110111 (1) 0010110111	false
22990	1	0000110111 (1) 0001110111	false
22991	1	0000110111 (1) 0000110101	false
22992	1	0111001111 (1) 0011001111	false
22993	1	0111001111 (1) 0101001111	false
22994	1	0111001111 (1) 0110001111	false
22995	1	0111001111 (1) 0111101111	false
22996	1	0111001111 (1) 0111000111	false
22997	1	1111001111 (1) 1101001111	false
22998	1	1111001111 (1) 1110001111	false
22999	1	1111001111 (1) 1111101111	false
23000	1	1111001111 (1) 1111000111	false
23001	1	1011001111 (1) 1111001111	false
23002	1	1011001111 (1) 1010001111	false
23003	1	1011001111 (1) 1011000111	false
23004	1	0011001111 (1) 0010001111	false
23005	1	0011001111 (1) 0011000111	false
23006	1	0101001111 (1) 0001001111	false
23007	1	0101001111 (1) 0101101111	false
23008	1	0101001111 (1) 0101000111	false
23009	1	1101001111 (1) 1101101111	false
23010	1	1101001111 (1) 1101000111	false
23011	1	0111110011 (1) 0011110011	false
23012	1	0111110011 (1) 0110110011	false
23013	1	0111110011 (1) 0111110111	false
23014	1	0111110011 (1) 0111110001	false
23015	1	0111100111 (1) 0011100111	false
23016	1	0111100111 (1) 0110100111	false
23017	1	0111100111 (1) 0111110111	false
23018	1	0111100111 (1) 0111100101	false
23019	1	1111110011 (1) 1011110011	false
23020	1	1111110011 (1) 1110110011	false
23021	1	1111110011 (1) 1111110111	false
23022	1	1111110011 (1) 1111110001	false
23023	1	1111100111 (1) 1110100111	false
23024	1	1111100111 (1) 1111110111	false
23025	1	1111100111 (1) 1111100101	false
23026	1	1001001111 (1) 1101001111	false
23027	1	1001001111 (1) 1011001111	false
23028	1	1001001111 (1) 1001000111	false
23029	1	0001001111 (1) 0011001111	false
23030	1	0001001111 (1) 0001000111	false
23031	1	1011110011 (1) 1010110011	false
23032	1	1011110011 (1) 1011010011	false
23033	1	1011110011 (1) 1011110111	false
23034	1	1011110011 (1) 1011110001	false
23035	1	1011100111 (1) 1111100111	false
23036	1	1011100111 (1) 1010100111	false
23037	1	1011100111 (1) 1011110111	false
23038	1	1011100111 (1) 1011100101	false
23039	1	0011110011 (1) 0010110011	false
23040	1	0011110011 (1) 0011010011	false
23041	1	0011110011 (1) 0011110111	false
23042	1	0011110011 (1) 0011110001	false
23043	1	0011100111 (1) 0010100111	false
23044	1	0011100111 (1) 0011110111	false
23045	1	0011100111 (1) 0011100101	false
23046	1	1011101110 (1) 1111101110	false
23047	1	1011101110 (1) 1010101110	false
23048	1	1011101110 (1) 1011001110	false
23049	1	1011101110 (1) 1011111110	false
23050	1	1011101110 (1) 1011100110	false
23051	1	1011101110 (1) 1011101010	false
23052	1	1011101110 (1) 1011101100	false
23053	1	0011101110 (1) 0010101110	false
23054	1	0011101110 (1) 0011001110	false
23055	1	0011101110 (1) 0011111110	false
23056	1	0011101110 (1) 0011100110	false
23057	1	0011101110 (1) 0011101010	false
23058	1	0011101110 (1) 0011101100	false
23059	1	0111111101 (1) 0011111101	false
23060	1	0111111101 (1) 0110111101	false
23061	1	1111111101 (1) 1011111101	false
23062	1	1111111101 (1) 1110111101	false
23063	1	0011111101 (1) 0010111101	false
23064	1	0011111101 (1) 0011011101	false
23065	1	0101110011 (1) 0001110011	false
23066	1	0101110011 (1) 0111110011	false
23067	1	0101110011 (1) 0101110111	false
23068	1	0101110011 (1) 0101110001	false
23069	1	0101100111 (1) 0001100111	false
23070	1	0101100111 (1) 0111100111	false
23071	1	0101100111 (1) 0101110111	false
23072	1	0101100111 (1) 0101100101	false
23073	1	0110001111 (1) 0010001111	false
23074	1	0110001111 (1) 0100001111	false
23075	1	0110001111 (1) 0110000111	false
23076	1	1011111101 (1) 1010111101	false
23077	1	1011111101 (1) 1011011101	false
23078	1	1101110011 (1) 1001110011	false
23079	1	1101110011 (1) 1111110011	false
23080	1	1101110011 (1) 1101110111	false
23081	1	1101110011 (1) 1101110001	false
23082	1	1101100111 (1) 1111100111	false
23083	1	1101100111 (1) 1101110111	false
23084	1	1101100111 (1) 1101100101	false
23085	1	1110001111 (1) 1100001111	false
23086	1	1110001111 (1) 1110000111	false
23087	1	1011100011 (1) 1111100011	false
23088	1	1011100011 (1) 1010100011	false
23089	1	1011100011 (1) 1011000011	false
23090	1	1011100011 (1) 1011110011	false
23091	1	1011100011 (1) 1011100111	false
23092	1	1011100011 (1) 1011100001	false
23093	1	1001110011 (1) 1011110011	false
23094	1	1001110011 (1) 1001010011	false
23095	1	1001110011 (1) 1001110111	false
23096	1	1001110011 (1) 1001110001	false
23097	1	1001100111 (1) 1101100111	false
23098	1	1001100111 (1) 1011100111	false
23099	1	1001100111 (1) 1001110111	false
23100	1	1001100111 (1) 1001100101	false
23101	1	0011100011 (1) 0010100011	false
23102	1	0011100011 (1) 0011000011	false
23103	1	0011100011 (1) 0011110011	false
23104	1	0011100011 (1) 0011100111	false
23105	1	0011100011 (1) 0011100001	false
23106	1	0001110011 (1) 0011110011	false
23107	1	0001110011 (1) 0001010011	false
23108	1	0001110011 (1) 0001110111	false
23109	1	0001110011 (1) 0001110001	false
23110	1	0001100111 (1) 0011100111	false
23111	1	0001100111 (1) 0001110111	false
23112	1	0001100111 (1) 0001100101	false
23113	1	1010001111 (1) 1110001111	false
23114	1	1010001111 (1) 1010000111	false
23115	1	0010001111 (1) 0010000111	false
23116	1	1111010111 (1) 1011010111	false
23117	1	1111010111 (1) 1101010111	false
23118	1	1111010111 (1) 1110010111	false
23119	1	1111010111 (1) 1111110111	false
23120	1	1111010111 (1) 1111000111	false
23121	1	0111010111 (1) 0011010111	false
23122	1	0111010111 (1) 0101010111	false
23123	1	0111010111 (1) 0110010111	false
23124	1	0111010111 (1) 0111110111	false
23125	1	0111010111 (1) 0111000111	false
23126	1	0011010111 (1) 0010010111	false
23127	1	0011010111 (1) 0011110111	false
23128	1	0011010111 (1) 0011000111	false
23129	1	0101111101 (1) 0001111101	false
23130	1	0101111101 (1) 0111111101	false
23131	1	1011010111 (1) 1010010111	false
23132	1	1011010111 (1) 1011110111	false
23133	1	1011010111 (1) 1011000111	false
23134	1	1101111101 (1) 1001111101	false
23135	1	1101111101 (1) 1111111101	false
23136	1	0001111101 (1) 0011111101	false
23137	1	0001111101 (1) 0001011101	false
23138	1	0100001111 (1) 0000001111	false
23139	1	0100001111 (1) 0101001111	false
23140	1	0100001111 (1) 0100000111	false
23141	1	1001111101 (1) 1011111101	false
23142	1	1001111101 (1) 1001011101	false
23143	1	1100001111 (1) 1101001111	false
23144	1	1100001111 (1) 1100000111	false
23145	1	0110110011 (1) 0010110011	false
23146	1	0110110011 (1) 0110010011	false
23147	1	0110110011 (1) 0110110111	false
23148	1	0110110011 (1) 0110110001	false
23149	1	0110100111 (1) 0010100111	false
23150	1	0110100111 (1) 0110110111	false
23151	1	0110100111 (1) 0110100101	false
23152	1	1110110011 (1) 1010110011	false
23153	1	1110110011 (1) 1110010011	false
23154	1	1110110011 (1) 1110110111	false
23155	1	1110110011 (1) 1110110001	false
23156	1	1110100111 (1) 1110110111	false
23157	1	1110100111 (1) 1110100101	false
23158	1	1000001111 (1) 1100001111	false
23159	1	1000001111 (1) 1010001111	false
23160	1	1000001111 (1) 1001001111	false
23161	1	1000001111 (1) 1000000111	false
23162	1	0000001111 (1) 0010001111	false
23163	1	0000001111 (1) 0001001111	false
23164	1	0000001111 (1) 0000000111	false
23165	1	0110101110 (1) 0010101110	false
23166	1	0110101110 (1) 0110001110	false
23167	1	0110101110 (1) 0110111110	false
23168	1	0110101110 (1) 0110100110	false
23169	1	0110101110 (1) 0110101010	false
23170	1	0110101110 (1) 0110101100	false
23171	1	0100101110 (1) 0000101110	false
23172	1	0100101110 (1) 0110101110	false
23173	1	0100101110 (1) 0101101110	false
23174	1	0100101110 (1) 0100001110	false
23175	1	0100101110 (1) 0100111110	false
23176	1	0100101110 (1) 0100100110	false
23177	1	0100101110 (1) 0100101010	false
23178	1	0100101110 (1) 0100101100	false
23179	1	1110101110 (1) 1110001110	false
23180	1	1110101110 (1) 1110111110	false
23181	1	1110101110 (1) 1110100110	false
23182	1	1110101110 (1) 1110101010	false
23183	1	1110101110 (1) 1110101100	false
23184	1	1010110011 (1) 1010010011	false
23185	1	1010110011 (1) 1010110111	false
23186	1	1010110011 (1) 1010110001	false
23187	1	1010100111 (1) 1110100111	false
23188	1	1010100111 (1) 1010110111	false
23189	1	1010100111 (1) 1010100101	false
23190	1	0010110011 (1) 0010010011	false
23191	1	0010110011 (1) 0010110111	false
23192	1	0010110011 (1) 0010110001	false
23193	1	0010100111 (1) 0010110111	false
23194	1	0010100111 (1) 0010100101	false
23195	1	0101010111 (1) 0001010111	false
23196	1	0101010111 (1) 0101110111	false
23197	1	0101010111 (1) 0101000111	false
23198	1	1101010111 (1) 1001010111	false
23199	1	1101010111 (1) 1101110111	false
23200	1	1101010111 (1) 1101000111	false
23201	1	1100101110 (1) 1110101110	false
23202	1	1100101110 (1) 1101101110	false
23203	1	1100101110 (1) 1100001110	false
23204	1	1100101110 (1) 1100111110	false
23205	1	1100101110 (1) 1100100110	false
23206	1	1100101110 (1) 1100101010	false
23207	1	1100101110 (1) 1100101100	false
23208	1	1010101110 (1) 1110101110	false
23209	1	1010101110 (1) 1010001110	false
23210	1	1010101110 (1) 1010111110	false
23211	1	1010101110 (1) 1010100110	false
23212	1	1010101110 (1) 1010101010	false
23213	1	1010101110 (1) 1010101100	false
23214	1	1001101110 (1) 1101101110	false
23215	1	1001101110 (1) 1011101110	false
23216	1	1001101110 (1) 1001001110	false
23217	1	1001101110 (1) 1001111110	false
23218	1	1001101110 (1) 1001100110	false
23219	1	1001101110 (1) 1001101010	false
23220	1	1001101110 (1) 1001101100	false
23221	1	1000101110 (1) 1100101110	false
23222	1	1000101110 (1) 1010101110	false
23223	1	1000101110 (1) 1001101110	false
23224	1	1000101110 (1) 1000001110	false
23225	1	1000101110 (1) 1000111110	false
23226	1	1000101110 (1) 1000100110	false
23227	1	1000101110 (1) 1000101010	false
23228	1	1000101110 (1) 1000101100	false
23229	1	0010101110 (1) 0010001110	false
23230	1	0010101110 (1) 0010111110	false
23231	1	0010101110 (1) 0010100110	false
23232	1	0010101110 (1) 0010101010	false
23233	1	0010101110 (1) 0010101100	false
23234	1	0001101110 (1) 0011101110	false
23235	1	0001101110 (1) 0001001110	false
23236	1	0001101110 (1) 0001111110	false
23237	1	0001101110 (1) 0001100110	false
23238	1	0001101110 (1) 0001101010	false
23239	1	0001101110 (1) 0001101100	false
23240	1	0000101110 (1) 0010101110	false
23241	1	0000101110 (1) 0001101110	false
23242	1	0000101110 (1) 0000001110	false
23243	1	0000101110 (1) 0000111110	false
23244	1	0000101110 (1) 0000100110	false
23245	1	0000101110 (1) 0000101010	false
23246	1	0000101110 (1) 0000101100	false
23247	1	0001010111 (1) 0011010111	false
23248	1	0001010111 (1) 0001110111	false
23249	1	0001010111 (1) 0001000111	false
23250	1	1001010111 (1) 1011010111	false
23251	1	1001010111 (1) 1001110111	false
23252	1	1001010111 (1) 1001000111	false
23253	1	0110111101 (1) 0010111101	false
23254	1	0110111101 (1) 0110011101	false
23255	1	1110111101 (1) 1010111101	false
23256	1	1110111101 (1) 1110011101	false
23257	1	0111101110 (1) 0011101110	false
23258	1	0111101110 (1) 0110101110	false
23259	1	0111101110 (1) 0111111110	false
23260	1	0111101110 (1) 0111100110	false
23261	1	0111101110 (1) 0111101010	false
23262	1	0111101110 (1) 0111101100	false
23263	1	1111101110 (1) 1110101110	false
23264	1	1111101110 (1) 1111111110	false
23265	1	1111101110 (1) 1111100110	false
23266	1	1111101110 (1) 1111101010	false
23267	1	1111101110 (1) 1111101100	false
23268	1	0110100011 (1) 0010100011	false
23269	1	0110100011 (1) 0110000011	false
23270	1	0110100011 (1) 0110110011	false
23271	1	0110100011 (1) 0110100111	false
23272	1	0110100011 (1) 0110100001	false
23273	1	0100110011 (1) 0000110011	false
23274	1	0100110011 (1) 0110110011	false
23275	1	0100110011 (1) 0101110011	false
23276	1	0100110011 (1) 0100010011	false
23277	1	0100110011 (1) 0100110111	false
23278	1	0100110011 (1) 0100110001	false
23279	1	0100100111 (1) 0000100111	false
23280	1	0100100111 (1) 0110100111	false
23281	1	0100100111 (1) 0101100111	false
23282	1	0100100111 (1) 0100110111	false
23283	1	0100100111 (1) 0100100101	false
23284	1	0100100011 (1) 0000100011	false
23285	1	0100100011 (1) 0110100011	false
23286	1	0100100011 (1) 0101100011	false
23287	1	0100100011 (1) 0100000011	false
23288	1	0100100011 (1) 0100110011	false
23289	1	0100100011 (1) 0100100111	false
23290	1	0100100011 (1) 0100100001	false
23291	1	1110100011 (1) 1110000011	false
23292	1	1110100011 (1) 1110110011	false
23293	1	1110100011 (1) 1110100111	false
23294	1	1110100011 (1) 1110100001	false
23295	1	1100110011 (1) 1000110011	false
23296	1	1100110011 (1) 1110110011	false
23297	1	1100110011 (1) 1101110011	false
23298	1	1100110011 (1) 1100010011	false
23299	1	1100110011 (1) 1100110111	false
23300	1	1100110011 (1) 1100110001	false
23301	1	1100100111 (1) 1110100111	false
23302	1	1100100111 (1) 1101100111	false
23303	1	1100100111 (1) 1100110111	false
23304	1	1100100111 (1) 1100100101	false
23305	1	0010111101 (1) 0010011101	false
23306	1	1010111101 (1) 1010011101	false
23307	1	1100100011 (1) 1110100011	false
23308	1	1100100011 (1) 1101100011	false
23309	1	1100100011 (1) 1100000011	false
23310	1	1100100011 (1) 1100110011	false
23311	1	1100100011 (1) 1100100111	false
23312	1	1100100011 (1) 1100100001	false
23313	1	1010100011 (1) 1110100011	false
23314	1	1010100011 (1) 1010000011	false
23315	1	1010100011 (1) 1010110011	false
23316	1	1010100011 (1) 1010100111	false
23317	1	1010100011 (1) 1010100001	false
23318	1	1001100011 (1) 1101100011	false
23319	1	1001100011 (1) 1011100011	false
23320	1	1001100011 (1) 1001000011	false
23321	1	1001100011 (1) 1001110011	false
23322	1	1001100011 (1) 1001100111	false
23323	1	1001100011 (1) 1001100001	false
23324	1	1000110011 (1) 1010110011	false
23325	1	1000110011 (1) 1001110011	false
23326	1	1000110011 (1) 1000010011	false
23327	1	1000110011 (1) 1000110111	false
23328	1	1000110011 (1) 1000110001	false
23329	1	1000100111 (1) 1100100111	false
23330	1	1000100111 (1) 1010100111	false
23331	1	1000100111 (1) 1001100111	false
23332	1	1000100111 (1) 1000110111	false
23333	1	1000100111 (1) 1000100101	false
23334	1	1000100011 (1) 1100100011	false
23335	1	1000100011 (1) 1010100011	false
23336	1	1000100011 (1) 1001100011	false
23337	1	1000100011 (1) 1000000011	false
23338	1	1000100011 (1) 1000110011	false
23339	1	1000100011 (1) 1000100111	false
23340	1	1000100011 (1) 1000100001	false
23341	1	0010100011 (1) 0010000011	false
23342	1	0010100011 (1) 0010110011	false
23343	1	0010100011 (1) 0010100111	false
23344	1	0010100011 (1) 0010100001	false
23345	1	0001100011 (1) 0011100011	false
23346	1	0001100011 (1) 0001000011	false
23347	1	0001100011 (1) 0001110011	false
23348	1	0001100011 (1) 0001100111	false
23349	1	0001100011 (1) 0001100001	false
23350	1	0000110011 (1) 0010110011	false
23351	1	0000110011 (1) 0001110011	false
23352	1	0000110011 (1) 0000010011	false
23353	1	0000110011 (1) 0000110111	false
23354	1	0000110011 (1) 0000110001	false
23355	1	0000100111 (1) 0010100111	false
23356	1	0000100111 (1) 0001100111	false
23357	1	0000100111 (1) 0000110111	false
23358	1	0000100111 (1) 0000100101	false
23359	1	0000100011 (1) 0010100011	false
23360	1	0000100011 (1) 0001100011	false
23361	1	0000100011 (1) 0000000011	false
23362	1	0000100011 (1) 0000110011	false
23363	1	0000100011 (1) 0000100111	false
23364	1	0000100011 (1) 0000100001	false
23365	1	0110010111 (1) 0010010111	false
23366	1	0110010111 (1) 0100010111	false
23367	1	0110010111 (1) 0110110111	false
23368	1	0110010111 (1) 0110000111	false
23369	1	1110010111 (1) 1010010111	false
23370	1	1110010111 (1) 1100010111	false
23371	1	1110010111 (1) 1110110111	false
23372	1	1110010111 (1) 1110000111	false
23373	1	0010010111 (1) 0010110111	false
23374	1	0010010111 (1) 0010000111	false
23375	1	1111100011 (1) 1110100011	false
23376	1	1111100011 (1) 1111110011	false
23377	1	1111100011 (1) 1111100111	false
23378	1	1111100011 (1) 1111100001	false
23379	1	1010010111 (1) 1010110111	false
23380	1	1010010111 (1) 1010000111	false
23381	1	0111100011 (1) 0011100011	false
23382	1	0111100011 (1) 0110100011	false
23383	1	0111100011 (1) 0111110011	false
23384	1	0111100011 (1) 0111100111	false
23385	1	0111100011 (1) 0111100001	false
23386	1	1100111101 (1) 1000111101	false
23387	1	1100111101 (1) 1110111101	false
23388	1	1100111101 (1) 1101111101	false
23389	1	1100111101 (1) 1100011101	false
23390	1	0100111101 (1) 0000111101	false
23391	1	0100111101 (1) 0110111101	false
23392	1	0100111101 (1) 0101111101	false
23393	1	0100111101 (1) 0100011101	false
23394	1	0101101110 (1) 0001101110	false
23395	1	0101101110 (1) 0111101110	false
23396	1	0101101110 (1) 0101111110	false
23397	1	0101101110 (1) 0101100110	false
23398	1	0101101110 (1) 0101101010	false
23399	1	0101101110 (1) 0101101100	false
23400	1	1101101110 (1) 1111101110	false
23401	1	1101101110 (1) 1101111110	false
23402	1	1101101110 (1) 1101100110	false
23403	1	1101101110 (1) 1101101010	false
23404	1	1101101110 (1) 1101101100	false
23405	1	1000111101 (1) 1010111101	false
23406	1	1000111101 (1) 1001111101	false
23407	1	1000111101 (1) 1000011101	false
23408	1	0000111101 (1) 0010111101	false
23409	1	0000111101 (1) 0001111101	false
23410	1	0000111101 (1) 0000011101	false
23411	1	1111011101 (1) 1011011101	false
23412	1	1111011101 (1) 1101011101	false
23413	1	1111011101 (1) 1110011101	false
23414	1	1111011101 (1) 1111111101	false
23415	1	1111011101 (1) 1111001101	false
23416	1	1111011101 (1) 1111011111	false
23417	1	1111011011 (1) 1011011011	false
23418	1	1111011011 (1) 1101011011	false
23419	1	1111011011 (1) 1110011011	false
23420	1	1111011011 (1) 1111111011	false
23421	1	1111011011 (1) 1111001011	false
23422	1	1111011011 (1) 1111010011	false
23423	1	1111011011 (1) 1111011111	false
23424	1	0111011101 (1) 0011011101	false
23425	1	0111011101 (1) 0101011101	false
23426	1	0111011101 (1) 0110011101	false
23427	1	0111011101 (1) 0111111101	false
23428	1	0111011101 (1) 0111001101	false
23429	1	0111011101 (1) 0111011111	false
23430	1	0111011011 (1) 0011011011	false
23431	1	0111011011 (1) 0101011011	false
23432	1	0111011011 (1) 0110011011	false
23433	1	0111011011 (1) 0111111011	false
23434	1	0111011011 (1) 0111001011	false
23435	1	0111011011 (1) 0111010011	false
23436	1	0111011011 (1) 0111011111	false
23437	1	0100010111 (1) 0000010111	false
23438	1	0100010111 (1) 0101010111	false
23439	1	0100010111 (1) 0100110111	false
23440	1	0100010111 (1) 0100000111	false
23441	1	1100010111 (1) 1000010111	false
23442	1	1100010111 (1) 1101010111	false
23443	1	1100010111 (1) 1100110111	false
23444	1	1100010111 (1) 1100000111	false
23445	1	0011011101 (1) 0010011101	false
23446	1	0011011101 (1) 0011001101	false
23447	1	0011011101 (1) 0011011111	false
23448	1	0011011011 (1) 0001011011	false
23449	1	0011011011 (1) 0010011011	false
23450	1	0011011011 (1) 0011001011	false
23451	1	0011011011 (1) 0011010011	false
23452	1	0011011011 (1) 0011011111	false
23453	1	1011011101 (1) 1010011101	false
23454	1	1011011101 (1) 1011001101	false
23455	1	1011011101 (1) 1011011111	false
23456	1	1011011011 (1) 1001011011	false
23457	1	1011011011 (1) 1010011011	false
23458	1	1011011011 (1) 1011001011	false
23459	1	1011011011 (1) 1011010011	false
23460	1	1011011011 (1) 1011011111	false
23461	1	1000010111 (1) 1010010111	false
23462	1	1000010111 (1) 1001010111	false
23463	1	1000010111 (1) 1000110111	false
23464	1	1000010111 (1) 1000000111	false
23465	1	0101100011 (1) 0001100011	false
23466	1	0101100011 (1) 0111100011	false
23467	1	0101100011 (1) 0101110011	false
23468	1	0101100011 (1) 0101100111	false
23469	1	0101100011 (1) 0101100001	false
23470	1	1101100011 (1) 1111100011	false
23471	1	1101100011 (1) 1101110011	false
23472	1	1101100011 (1) 1101100111	false
23473	1	1101100011 (1) 1101100001	false
23474	1	0000010111 (1) 0010010111	false
23475	1	0000010111 (1) 0001010111	false
23476	1	0000010111 (1) 0000110111	false
23477	1	0000010111 (1) 0000000111	false
23478	1	0111111110 (1) 0011111110	false
23479	1	0111111110 (1) 0110111110	false
23480	1	0111111110 (1) 0111110110	false
23481	1	0111111110 (1) 0111111100	false
23482	1	1111111110 (1) 1011111110	false
23483	1	1111111110 (1) 1110111110	false
23484	1	1111111110 (1) 1111110110	false
23485	1	1111111110 (1) 1111111100	false
23486	1	0011111110 (1) 0010111110	false
23487	1	0011111110 (1) 0011011110	false
23488	1	0011111110 (1) 0011110110	false
23489	1	0011111110 (1) 0011111100	false
23490	1	1011111110 (1) 1010111110	false
23491	1	1011111110 (1) 1011011110	false
23492	1	1011111110 (1) 1011110110	false
23493	1	1011111110 (1) 1011111100	false
23494	1	0101011101 (1) 0001011101	false
23495	1	0101011101 (1) 0101111101	false
23496	1	0101011101 (1) 0101001101	false
23497	1	0101011101 (1) 0101011111	false
23498	1	0101011011 (1) 0001011011	false
23499	1	0101011011 (1) 0101111011	false
23500	1	0101011011 (1) 0101001011	false
23501	1	0101011011 (1) 0101010011	false
23502	1	0101011011 (1) 0101011111	false
23503	1	1101011101 (1) 1001011101	false
23504	1	1101011101 (1) 1101111101	false
23505	1	1101011101 (1) 1101001101	false
23506	1	1101011101 (1) 1101011111	false
23507	1	1101011011 (1) 1001011011	false
23508	1	1101011011 (1) 1101111011	false
23509	1	1101011011 (1) 1101001011	false
23510	1	1101011011 (1) 1101010011	false
23511	1	1101011011 (1) 1101011111	false
23512	1	0001011101 (1) 0011011101	false
23513	1	0001011101 (1) 0001001101	false
23514	1	0001011101 (1) 0001011111	false
23515	1	0001011011 (1) 0001001011	false
23516	1	0001011011 (1) 0001010011	false
23517	1	0001011011 (1) 0001011111	false
23518	1	1001011101 (1) 1011011101	false
23519	1	1001011101 (1) 1001001101	false
23520	1	1001011101 (1) 1001011111	false
23521	1	1001011011 (1) 1001001011	false
23522	1	1001011011 (1) 1001010011	false
23523	1	1001011011 (1) 1001011111	false
23524	1	0101111110 (1) 0001111110	false
23525	1	0101111110 (1) 0111111110	false
23526	1	0101111110 (1) 0101110110	false
23527	1	0101111110 (1) 0101111100	false
23528	1	1101111110 (1) 1001111110	false
23529	1	1101111110 (1) 1111111110	false
23530	1	1101111110 (1) 1101110110	false
23531	1	1101111110 (1) 1101111100	false
23532	1	0001111110 (1) 0011111110	false
23533	1	0001111110 (1) 0001011110	false
23534	1	0001111110 (1) 0001110110	false
23535	1	0001111110 (1) 0001111100	false
23536	1	1001111110 (1) 1011111110	false
23537	1	1001111110 (1) 1001011110	false
23538	1	1001111110 (1) 1001110110	false
23539	1	1001111110 (1) 1001111100	false
23540	1	0111101101 (1) 0011101101	false
23541	1	0111101101 (1) 0110101101	false
23542	1	0111101101 (1) 0111111101	false
23543	1	0111101101 (1) 0111100101	false
23544	1	0110011101 (1) 0010011101	false
23545	1	0110011101 (1) 0100011101	false
23546	1	0110011101 (1) 0110001101	false
23547	1	0110011101 (1) 0110011111	false
23548	1	0110011011 (1) 0010011011	false
23549	1	0110011011 (1) 0100011011	false
23550	1	0110011011 (1) 0110001011	false
23551	1	0110011011 (1) 0110010011	false
23552	1	0110011011 (1) 0110011111	false
23553	1	1111101101 (1) 1110101101	false
23554	1	1111101101 (1) 1111111101	false
23555	1	1111101101 (1) 1111100101	false
23556	1	1110011101 (1) 1010011101	false
23557	1	1110011101 (1) 1100011101	false
23558	1	1110011101 (1) 1110001101	false
23559	1	1110011101 (1) 1110011111	false
23560	1	1110011011 (1) 1010011011	false
23561	1	1110011011 (1) 1100011011	false
23562	1	1110011011 (1) 1110001011	false
23563	1	1110011011 (1) 1110010011	false
23564	1	1110011011 (1) 1110011111	false
23565	1	0011101101 (1) 0010101101	false
23566	1	0011101101 (1) 0011001101	false
23567	1	0011101101 (1) 0011111101	false
23568	1	0011101101 (1) 0011100101	false
23569	1	0010011101 (1) 0010001101	false
23570	1	0010011101 (1) 0010011111	false
23571	1	0010011011 (1) 0000011011	false
23572	1	0010011011 (1) 0010001011	false
23573	1	0010011011 (1) 0010010011	false
23574	1	0010011011 (1) 0010011111	false
23575	1	1010011101 (1) 1010001101	false
23576	1	1010011101 (1) 1010011111	false
23577	1	1010011011 (1) 1000011011	false
23578	1	1010011011 (1) 1010001011	false
23579	1	1010011011 (1) 1010010011	false
23580	1	1010011011 (1) 1010011111	false
23581	1	1011101101 (1) 1111101101	false
23582	1	1011101101 (1) 1010101101	false
23583	1	1011101101 (1) 1011001101	false
23584	1	1011101101 (1) 1011111101	false
23585	1	1011101101 (1) 1011100101	false
23586	1	1110111110 (1) 1010111110	false
23587	1	1110111110 (1) 1110011110	false
23588	1	1110111110 (1) 1110110110	false
23589	1	1110111110 (1) 1110111100	false
23590	1	0110111110 (1) 0010111110	false
23591	1	0110111110 (1) 0110011110	false
23592	1	0110111110 (1) 0110110110	false
23593	1	0110111110 (1) 0110111100	false
23594	1	0010111110 (1) 0010011110	false
23595	1	0010111110 (1) 0010110110	false
23596	1	0010111110 (1) 0010111100	false
23597	1	1010111110 (1) 1010011110	false
23598	1	1010111110 (1) 1010110110	false
23599	1	1010111110 (1) 1010111100	false
23600	1	0111000111 (1) 0011000111	false
23601	1	0111000111 (1) 0101000111	false
23602	1	0111000111 (1) 0110000111	false
23603	1	0111000111 (1) 0111100111	false
23604	1	1111000111 (1) 1101000111	false
23605	1	1111000111 (1) 1110000111	false
23606	1	1111000111 (1) 1111100111	false
23607	1	0100011101 (1) 0000011101	false
23608	1	0100011101 (1) 0101011101	false
23609	1	0100011101 (1) 0100001101	false
23610	1	0100011101 (1) 0100011111	false
23611	1	0100011011 (1) 0000011011	false
23612	1	0100011011 (1) 0101011011	false
23613	1	0100011011 (1) 0100001011	false
23614	1	0100011011 (1) 0100010011	false
23615	1	0100011011 (1) 0100011111	false
23616	1	0101101101 (1) 0001101101	false
23617	1	0101101101 (1) 0111101101	false
23618	1	0101101101 (1) 0101111101	false
23619	1	0101101101 (1) 0101100101	false
23620	1	1101101101 (1) 1111101101	false
23621	1	1101101101 (1) 1101111101	false
23622	1	1101101101 (1) 1101100101	false
23623	1	1100011101 (1) 1000011101	false
23624	1	1100011101 (1) 1101011101	false
23625	1	1100011101 (1) 1100001101	false
23626	1	1100011101 (1) 1100011111	false
23627	1	1100011011 (1) 1000011011	false
23628	1	1100011011 (1) 1101011011	false
23629	1	1100011011 (1) 1100001011	false
23630	1	1100011011 (1) 1100010011	false
23631	1	1100011011 (1) 1100011111	false
23632	1	1011000111 (1) 1111000111	false
23633	1	1011000111 (1) 1010000111	false
23634	1	1011000111 (1) 1011100111	false
23635	1	0011000111 (1) 0010000111	false
23636	1	0011000111 (1) 0011100111	false
23637	1	0111110110 (1) 0011110110	false
23638	1	0111110110 (1) 0110110110	false
23639	1	0111110110 (1) 0111110010	false
23640	1	0111110110 (1) 0111110100	false
23641	1	1111110110 (1) 1011110110	false
23642	1	1111110110 (1) 1110110110	false
23643	1	1111110110 (1) 1111110010	false
23644	1	1111110110 (1) 1111110100	false
23645	1	1011101001 (1) 1111101001	false
23646	1	1011101001 (1) 1010101001	false
23647	1	1011101001 (1) 1011001001	false
23648	1	1011101001 (1) 1011111001	false
23649	1	1011101001 (1) 1011100001	false
23650	1	1011101001 (1) 1011101101	false
23651	1	1001101101 (1) 1101101101	false
23652	1	1001101101 (1) 1011101101	false
23653	1	1001101101 (1) 1001001101	false
23654	1	1001101101 (1) 1001111101	false
23655	1	1001101101 (1) 1001100101	false
23656	1	0011101001 (1) 0010101001	false
23657	1	0011101001 (1) 0011001001	false
23658	1	0011101001 (1) 0011111001	false
23659	1	0011101001 (1) 0011100001	false
23660	1	0011101001 (1) 0011101101	false
23661	1	0001101101 (1) 0011101101	false
23662	1	0001101101 (1) 0001001101	false
23663	1	0001101101 (1) 0001111101	false
23664	1	0001101101 (1) 0001100101	false
23665	1	1000011101 (1) 1010011101	false
23666	1	1000011101 (1) 1001011101	false
23667	1	1000011101 (1) 1000001101	false
23668	1	1000011101 (1) 1000011111	false
23669	1	1000011011 (1) 1001011011	false
23670	1	1000011011 (1) 1000001011	false
23671	1	1000011011 (1) 1000010011	false
23672	1	1000011011 (1) 1000011111	false
23673	1	0100111110 (1) 0000111110	false
23674	1	0100111110 (1) 0110111110	false
23675	1	0100111110 (1) 0101111110	false
23676	1	0100111110 (1) 0100011110	false
23677	1	0100111110 (1) 0100110110	false
23678	1	0100111110 (1) 0100111100	false
23679	1	1100111110 (1) 1000111110	false
23680	1	1100111110 (1) 1110111110	false
23681	1	1100111110 (1) 1101111110	false
23682	1	1100111110 (1) 1100011110	false
23683	1	1100111110 (1) 1100110110	false
23684	1	1100111110 (1) 1100111100	false
23685	1	0011110110 (1) 0010110110	false
23686	1	0011110110 (1) 0011110010	false
23687	1	0011110110 (1) 0011110100	false
23688	1	1011110110 (1) 1010110110	false
23689	1	1011110110 (1) 1011110010	false
23690	1	1011110110 (1) 1011110100	false
23691	1	0000011101 (1) 0010011101	false
23692	1	0000011101 (1) 0001011101	false
23693	1	0000011101 (1) 0000001101	false
23694	1	0000011101 (1) 0000011111	false
23695	1	0000011011 (1) 0001011011	false
23696	1	0000011011 (1) 0000001011	false
23697	1	0000011011 (1) 0000010011	false
23698	1	0000011011 (1) 0000011111	false
23699	1	1000111110 (1) 1010111110	false
23700	1	1000111110 (1) 1001111110	false
23701	1	1000111110 (1) 1000011110	false
23702	1	1000111110 (1) 1000110110	false
23703	1	1000111110 (1) 1000111100	false
23704	1	0000111110 (1) 0010111110	false
23705	1	0000111110 (1) 0001111110	false
23706	1	0000111110 (1) 0000011110	false
23707	1	0000111110 (1) 0000110110	false
23708	1	0000111110 (1) 0000111100	false
23709	1	0101000111 (1) 0001000111	false
23710	1	0101000111 (1) 0101100111	false
23711	1	1101000111 (1) 1101100111	false
23712	1	0001000111 (1) 0011000111	false
23713	1	0001000111 (1) 0001100111	false
23714	1	0101110110 (1) 0001110110	false
23715	1	0101110110 (1) 0111110110	false
23716	1	0101110110 (1) 0101110010	false
23717	1	0101110110 (1) 0101110100	false
23718	1	1001000111 (1) 1101000111	false
23719	1	1001000111 (1) 1011000111	false
23720	1	1001000111 (1) 1001100111	false
23721	1	1101110110 (1) 1001110110	false
23722	1	1101110110 (1) 1111110110	false
23723	1	1101110110 (1) 1101110010	false
23724	1	1101110110 (1) 1101110100	false
23725	1	0110101101 (1) 0010101101	false
23726	1	0110101101 (1) 0110001101	false
23727	1	0110101101 (1) 0110111101	false
23728	1	0110101101 (1) 0110100101	false
23729	1	1110101101 (1) 1110001101	false
23730	1	1110101101 (1) 1110111101	false
23731	1	1110101101 (1) 1110100101	false
23732	1	0001110110 (1) 0011110110	false
23733	1	0001110110 (1) 0001110010	false
23734	1	0001110110 (1) 0001110100	false
23735	1	1001110110 (1) 1011110110	false
23736	1	1001110110 (1) 1001110010	false
23737	1	1001110110 (1) 1001110100	false
23738	1	1010101101 (1) 1110101101	false
23739	1	1010101101 (1) 1010001101	false
23740	1	1010101101 (1) 1010111101	false
23741	1	1010101101 (1) 1010100101	false
23742	1	0010101101 (1) 0010001101	false
23743	1	0010101101 (1) 0010111101	false
23744	1	0010101101 (1) 0010100101	false
23745	1	0111111001 (1) 0011111001	false
23746	1	0111111001 (1) 0110111001	false
23747	1	0111111001 (1) 0111111101	false
23748	1	0111110101 (1) 0011110101	false
23749	1	0111110101 (1) 0110110101	false
23750	1	0111110101 (1) 0111111101	false
23751	1	1111111001 (1) 1011111001	false
23752	1	1111111001 (1) 1110111001	false
23753	1	1111111001 (1) 1111111101	false
23754	1	1111110101 (1) 1011110101	false
23755	1	1111110101 (1) 1110110101	false
23756	1	1111110101 (1) 1111111101	false
23757	1	0011111001 (1) 0010111001	false
23758	1	0011111001 (1) 0011011001	false
23759	1	0011111001 (1) 0011111101	false
23760	1	0011110101 (1) 0010110101	false
23761	1	0011110101 (1) 0011111101	false
23762	1	0110000111 (1) 0010000111	false
23763	1	0110000111 (1) 0100000111	false
23764	1	0110000111 (1) 0110100111	false
23765	1	1011111001 (1) 1010111001	false
23766	1	1011111001 (1) 1011011001	false
23767	1	1011111001 (1) 1011111101	false
23768	1	1011110101 (1) 1010110101	false
23769	1	1011110101 (1) 1011111101	false
23770	1	1110000111 (1) 1100000111	false
23771	1	1110000111 (1) 1110100111	false
23772	1	0110101001 (1) 0010101001	false
23773	1	0110101001 (1) 0110001001	false
23774	1	0110101001 (1) 0110111001	false
23775	1	0110101001 (1) 0110100001	false
23776	1	0110101001 (1) 0110101101	false
23777	1	0100101101 (1) 0000101101	false
23778	1	0100101101 (1) 0110101101	false
23779	1	0100101101 (1) 0101101101	false
23780	1	0100101101 (1) 0100001101	false
23781	1	0100101101 (1) 0100111101	false
23782	1	0100101101 (1) 0100100101	false
23783	1	0100101001 (1) 0000101001	false
23784	1	0100101001 (1) 0110101001	false
23785	1	0100101001 (1) 0101101001	false
23786	1	0100101001 (1) 0100001001	false
23787	1	0100101001 (1) 0100111001	false
23788	1	0100101001 (1) 0100100001	false
23789	1	0100101001 (1) 0100101101	false
23790	1	1110101001 (1) 1110001001	false
23791	1	1110101001 (1) 1110111001	false
23792	1	1110101001 (1) 1110100001	false
23793	1	1110101001 (1) 1110101101	false
23794	1	1100101101 (1) 1110101101	false
23795	1	1100101101 (1) 1101101101	false
23796	1	1100101101 (1) 1100001101	false
23797	1	1100101101 (1) 1100111101	false
23798	1	1100101101 (1) 1100100101	false
23799	1	1010000111 (1) 1110000111	false
23800	1	1010000111 (1) 1010100111	false
23801	1	0010000111 (1) 0010100111	false
23802	1	0110110110 (1) 0010110110	false
23803	1	0110110110 (1) 0110110010	false
23804	1	0110110110 (1) 0110110100	false
23805	1	1110110110 (1) 1010110110	false
23806	1	1110110110 (1) 1110110010	false
23807	1	1110110110 (1) 1110110100	false
23808	1	1100101001 (1) 1110101001	false
23809	1	1100101001 (1) 1101101001	false
23810	1	1100101001 (1) 1100001001	false
23811	1	1100101001 (1) 1100111001	false
23812	1	1100101001 (1) 1100100001	false
23813	1	1100101001 (1) 1100101101	false
23814	1	1010101001 (1) 1110101001	false
23815	1	1010101001 (1) 1010001001	false
23816	1	1010101001 (1) 1010111001	false
23817	1	1010101001 (1) 1010100001	false
23818	1	1010101001 (1) 1010101101	false
23819	1	1001101001 (1) 1101101001	false
23820	1	1001101001 (1) 1011101001	false
23821	1	1001101001 (1) 1001001001	false
23822	1	1001101001 (1) 1001111001	false
23823	1	1001101001 (1) 1001100001	false
23824	1	1001101001 (1) 1001101101	false
23825	1	1000101101 (1) 1100101101	false
23826	1	1000101101 (1) 1010101101	false
23827	1	1000101101 (1) 1001101101	false
23828	1	1000101101 (1) 1000001101	false
23829	1	1000101101 (1) 1000111101	false
23830	1	1000101101 (1) 1000100101	false
23831	1	1000101001 (1) 1100101001	false
23832	1	1000101001 (1) 1010101001	false
23833	1	1000101001 (1) 1001101001	false
23834	1	1000101001 (1) 1000001001	false
23835	1	1000101001 (1) 1000111001	false
23836	1	1000101001 (1) 1000100001	false
23837	1	1000101001 (1) 1000101101	false
23838	1	0010101001 (1) 0010001001	false
23839	1	0010101001 (1) 0010111001	false
23840	1	0010101001 (1) 0010100001	false
23841	1	0010101001 (1) 0010101101	false
23842	1	0001101001 (1) 0011101001	false
23843	1	0001101001 (1) 0001001001	false
23844	1	0001101001 (1) 0001111001	false
23845	1	0001101001 (1) 0001100001	false
23846	1	0001101001 (1) 0001101101	false
23847	1	0000101101 (1) 0010101101	false
23848	1	0000101101 (1) 0001101101	false
23849	1	0000101101 (1) 0000001101	false
23850	1	0000101101 (1) 0000111101	false
23851	1	0000101101 (1) 0000100101	false
23852	1	0000101001 (1) 0010101001	false
23853	1	0000101001 (1) 0001101001	false
23854	1	0000101001 (1) 0000001001	false
23855	1	0000101001 (1) 0000111001	false
23856	1	0000101001 (1) 0000100001	false
23857	1	0000101001 (1) 0000101101	false
23858	1	0010110110 (1) 0010110010	false
23859	1	0010110110 (1) 0010110100	false
23860	1	1010110110 (1) 1010110010	false
23861	1	1010110110 (1) 1010110100	false
23862	1	0101111001 (1) 0001111001	false
23863	1	0101111001 (1) 0111111001	false
23864	1	0101111001 (1) 0101111101	false
23865	1	0101110101 (1) 0001110101	false
23866	1	0101110101 (1) 0111110101	false
23867	1	0101110101 (1) 0101111101	false
23868	1	1101111001 (1) 1001111001	false
23869	1	1101111001 (1) 1111111001	false
23870	1	1101111001 (1) 1101111101	false
23871	1	1101110101 (1) 1001110101	false
23872	1	1101110101 (1) 1111110101	false
23873	1	1101110101 (1) 1101111101	false
23874	1	0111101001 (1) 0011101001	false
23875	1	0111101001 (1) 0110101001	false
23876	1	0111101001 (1) 0111111001	false
23877	1	0111101001 (1) 0111100001	false
23878	1	0111101001 (1) 0111101101	false
23879	1	0111001101 (1) 0011001101	false
23880	1	0111001101 (1) 0101001101	false
23881	1	0111001101 (1) 0110001101	false
23882	1	0111001101 (1) 0111101101	false
23883	1	0111001101 (1) 0111000101	false
23884	1	0111001101 (1) 0111001111	false
23885	1	0111001011 (1) 0011001011	false
23886	1	0111001011 (1) 0101001011	false
23887	1	0111001011 (1) 0110001011	false
23888	1	0111001011 (1) 0111101011	false
23889	1	0111001011 (1) 0111000011	false
23890	1	0111001011 (1) 0111001111	false
23891	1	0111001001 (1) 0011001001	false
23892	1	0111001001 (1) 0101001001	false
23893	1	0111001001 (1) 0110001001	false
23894	1	0111001001 (1) 0111101001	false
23895	1	0111001001 (1) 0111000001	false
23896	1	0111001001 (1) 0111001101	false
23897	1	0111001001 (1) 0111001011	false
23898	1	0001111001 (1) 0011111001	false
23899	1	0001111001 (1) 0001011001	false
23900	1	0001111001 (1) 0001111101	false
23901	1	0001110101 (1) 0011110101	false
23902	1	0001110101 (1) 0001111101	false
23903	1	0100000111 (1) 0000000111	false
23904	1	0100000111 (1) 0101000111	false
23905	1	0100000111 (1) 0100100111	false
23906	1	1001111001 (1) 1011111001	false
23907	1	1001111001 (1) 1001011001	false
23908	1	1001111001 (1) 1001111101	false
23909	1	1001110101 (1) 1011110101	false
23910	1	1001110101 (1) 1001111101	false
23911	1	1111101001 (1) 1110101001	false
23912	1	1111101001 (1) 1111111001	false
23913	1	1111101001 (1) 1111100001	false
23914	1	1111101001 (1) 1111101101	false
23915	1	1111001101 (1) 1101001101	false
23916	1	1111001101 (1) 1110001101	false
23917	1	1111001101 (1) 1111101101	false
23918	1	1111001101 (1) 1111000101	false
23919	1	1111001101 (1) 1111001111	false
23920	1	1111001011 (1) 1101001011	false
23921	1	1111001011 (1) 1110001011	false
23922	1	1111001011 (1) 1111101011	false
23923	1	1111001011 (1) 1111000011	false
23924	1	1111001011 (1) 1111001111	false
23925	1	1100000111 (1) 1101000111	false
23926	1	1100000111 (1) 1100100111	false
23927	1	0000000111 (1) 0010000111	false
23928	1	0000000111 (1) 0001000111	false
23929	1	0000000111 (1) 0000100111	false
23930	1	0111111010 (1) 0011111010	false
23931	1	0111111010 (1) 0110111010	false
23932	1	0111111010 (1) 0111110010	false
23933	1	0111111010 (1) 0111111110	false
23934	1	0111111010 (1) 0111111000	false
23935	1	0011001101 (1) 0010001101	false
23936	1	0011001101 (1) 0011000101	false
23937	1	0011001101 (1) 0011001111	false
23938	1	0011001011 (1) 0001001011	false
23939	1	0011001011 (1) 0010001011	false
23940	1	0011001011 (1) 0011000011	false
23941	1	0011001011 (1) 0011001111	false
23942	1	0011001001 (1) 0001001001	false
23943	1	0011001001 (1) 0010001001	false
23944	1	0011001001 (1) 0011000001	false
23945	1	0011001001 (1) 0011001101	false
23946	1	0011001001 (1) 0011001011	false
23947	1	1000000111 (1) 1100000111	false
23948	1	1000000111 (1) 1010000111	false
23949	1	1000000111 (1) 1001000111	false
23950	1	1000000111 (1) 1000100111	false
23951	1	1111001001 (1) 1101001001	false
23952	1	1111001001 (1) 1110001001	false
23953	1	1111001001 (1) 1111101001	false
23954	1	1111001001 (1) 1111000001	false
23955	1	1111001001 (1) 1111001101	false
23956	1	1111001001 (1) 1111001011	false
23957	1	1011001101 (1) 1111001101	false
23958	1	1011001101 (1) 1010001101	false
23959	1	1011001101 (1) 1011000101	false
23960	1	1011001101 (1) 1011001111	false
23961	1	1011001011 (1) 1111001011	false
23962	1	1011001011 (1) 1001001011	false
23963	1	1011001011 (1) 1010001011	false
23964	1	1011001011 (1) 1011000011	false
23965	1	1011001011 (1) 1011001111	false
23966	1	1011001001 (1) 1111001001	false
23967	1	1011001001 (1) 1001001001	false
23968	1	1011001001 (1) 1010001001	false
23969	1	1011001001 (1) 1011000001	false
23970	1	1011001001 (1) 1011001101	false
23971	1	1011001001 (1) 1011001011	false
23972	1	0100110110 (1) 0000110110	false
23973	1	0100110110 (1) 0110110110	false
23974	1	0100110110 (1) 0101110110	false
23975	1	0100110110 (1) 0100110010	false
23976	1	0100110110 (1) 0100110100	false
23977	1	1111111010 (1) 1011111010	false
23978	1	1111111010 (1) 1110111010	false
23979	1	1111111010 (1) 1111110010	false
23980	1	1111111010 (1) 1111111110	false
23981	1	1111111010 (1) 1111111000	false
23982	1	1100110110 (1) 1000110110	false
23983	1	1100110110 (1) 1110110110	false
23984	1	1100110110 (1) 1101110110	false
23985	1	1100110110 (1) 1100110010	false
23986	1	1100110110 (1) 1100110100	false
23987	1	1011111010 (1) 1010111010	false
23988	1	1011111010 (1) 1011011010	false
23989	1	1011111010 (1) 1011110010	false
23990	1	1011111010 (1) 1011111110	false
23991	1	1011111010 (1) 1011111000	false
23992	1	0011111010 (1) 0010111010	false
23993	1	0011111010 (1) 0011011010	false
23994	1	0011111010 (1) 0011110010	false
23995	1	0011111010 (1) 0011111110	false
23996	1	0011111010 (1) 0011111000	false
23997	1	0000110110 (1) 0010110110	false
23998	1	0000110110 (1) 0001110110	false
23999	1	0000110110 (1) 0000110010	false
24000	1	0000110110 (1) 0000110100	false
24001	1	1000110110 (1) 1010110110	false
24002	1	1000110110 (1) 1001110110	false
24003	1	1000110110 (1) 1000110010	false
24004	1	1000110110 (1) 1000110100	false
24005	1	0101101001 (1) 0001101001	false
24006	1	0101101001 (1) 0111101001	false
24007	1	0101101001 (1) 0101111001	false
24008	1	0101101001 (1) 0101100001	false
24009	1	0101101001 (1) 0101101101	false
24010	1	0101001101 (1) 0001001101	false
24011	1	0101001101 (1) 0101101101	false
24012	1	0101001101 (1) 0101000101	false
24013	1	0101001101 (1) 0101001111	false
24014	1	0101001011 (1) 0001001011	false
24015	1	0101001011 (1) 0101101011	false
24016	1	0101001011 (1) 0101000011	false
24017	1	0101001011 (1) 0101001111	false
24018	1	0110111001 (1) 0010111001	false
24019	1	0110111001 (1) 0110011001	false
24020	1	0110111001 (1) 0110111101	false
24021	1	0110110101 (1) 0010110101	false
24022	1	0110110101 (1) 0110111101	false
24023	1	1101101001 (1) 1111101001	false
24024	1	1101101001 (1) 1101111001	false
24025	1	1101101001 (1) 1101100001	false
24026	1	1101101001 (1) 1101101101	false
24027	1	1101001101 (1) 1101101101	false
24028	1	1101001101 (1) 1101000101	false
24029	1	1101001101 (1) 1101001111	false
24030	1	1101001011 (1) 1101101011	false
24031	1	1101001011 (1) 1101000011	false
24032	1	1101001011 (1) 1101001111	false
24033	1	1110111001 (1) 1010111001	false
24034	1	1110111001 (1) 1110011001	false
24035	1	1110111001 (1) 1110111101	false
24036	1	1110110101 (1) 1010110101	false
24037	1	1110110101 (1) 1110111101	false
24038	1	0111100110 (1) 0011100110	false
24039	1	0111100110 (1) 0110100110	false
24040	1	0111100110 (1) 0111110110	false
24041	1	0111100110 (1) 0111100010	false
24042	1	0111100110 (1) 0111100100	false
24043	1	1111100110 (1) 1110100110	false
24044	1	1111100110 (1) 1111110110	false
24045	1	1111100110 (1) 1111100010	false
24046	1	1111100110 (1) 1111100100	false
24047	1	0010111001 (1) 0010011001	false
24048	1	0010111001 (1) 0010111101	false
24049	1	0010110101 (1) 0010111101	false
24050	1	1010111001 (1) 1010011001	false
24051	1	1010111001 (1) 1010111101	false
24052	1	1010110101 (1) 1010111101	false
24053	1	0001001101 (1) 0011001101	false
24054	1	0001001101 (1) 0001000101	false
24055	1	0001001101 (1) 0001001111	false
24056	1	0001001011 (1) 0001000011	false
24057	1	0001001011 (1) 0001001111	false
24058	1	0011100110 (1) 0010100110	false
24059	1	0011100110 (1) 0011110110	false
24060	1	0011100110 (1) 0011100010	false
24061	1	0011100110 (1) 0011100100	false
24062	1	0101111010 (1) 0001111010	false
24063	1	0101111010 (1) 0111111010	false
24064	1	0101111010 (1) 0101110010	false
24065	1	0101111010 (1) 0101111110	false
24066	1	0101111010 (1) 0101111000	false
24067	1	1011100110 (1) 1111100110	false
24068	1	1011100110 (1) 1010100110	false
24069	1	1011100110 (1) 1011110110	false
24070	1	1011100110 (1) 1011100010	false
24071	1	1011100110 (1) 1011100100	false
24072	1	1001001101 (1) 1101001101	false
24073	1	1001001101 (1) 1011001101	false
24074	1	1001001101 (1) 1001000101	false
24075	1	1001001101 (1) 1001001111	false
24076	1	1001001011 (1) 1101001011	false
24077	1	1001001011 (1) 1001000011	false
24078	1	1001001011 (1) 1001001111	false
24079	1	1101111010 (1) 1001111010	false
24080	1	1101111010 (1) 1111111010	false
24081	1	1101111010 (1) 1101110010	false
24082	1	1101111010 (1) 1101111110	false
24083	1	1101111010 (1) 1101111000	false
24084	1	1011101010 (1) 1111101010	false
24085	1	1011101010 (1) 1010101010	false
24086	1	1011101010 (1) 1011001010	false
24087	1	1011101010 (1) 1011111010	false
24088	1	1011101010 (1) 1011100010	false
24089	1	1011101010 (1) 1011101000	false
24090	1	1001111010 (1) 1011111010	false
24091	1	1001111010 (1) 1001011010	false
24092	1	1001111010 (1) 1001110010	false
24093	1	1001111010 (1) 1001111110	false
24094	1	1001111010 (1) 1001111000	false
24095	1	0011101010 (1) 0010101010	false
24096	1	0011101010 (1) 0011001010	false
24097	1	0011101010 (1) 0011111010	false
24098	1	0011101010 (1) 0011100010	false
24099	1	0011101010 (1) 0011101000	false
24100	1	0001111010 (1) 0011111010	false
24101	1	0001111010 (1) 0001011010	false
24102	1	0001111010 (1) 0001110010	false
24103	1	0001111010 (1) 0001111110	false
24104	1	0001111010 (1) 0001111000	false
24105	1	1111011110 (1) 1011011110	false
24106	1	1111011110 (1) 1101011110	false
24107	1	1111011110 (1) 1110011110	false
24108	1	1111011110 (1) 1111111110	false
24109	1	1111011110 (1) 1111001110	false
24110	1	1111011110 (1) 1111010110	false
24111	1	0111011110 (1) 0011011110	false
24112	1	0111011110 (1) 0101011110	false
24113	1	0111011110 (1) 0110011110	false
24114	1	0111011110 (1) 0111111110	false
24115	1	0111011110 (1) 0111001110	false
24116	1	0111011110 (1) 0111010110	false
24117	1	0100111001 (1) 0000111001	false
24118	1	0100111001 (1) 0110111001	false
24119	1	0100111001 (1) 0101111001	false
24120	1	0100111001 (1) 0100011001	false
24121	1	0100111001 (1) 0100111101	false
24122	1	0100110101 (1) 0000110101	false
24123	1	0100110101 (1) 0110110101	false
24124	1	0100110101 (1) 0101110101	false
24125	1	0100110101 (1) 0100111101	false
24126	1	1100111001 (1) 1000111001	false
24127	1	1100111001 (1) 1110111001	false
24128	1	1100111001 (1) 1101111001	false
24129	1	1100111001 (1) 1100011001	false
24130	1	1100111001 (1) 1100111101	false
24131	1	1100110101 (1) 1000110101	false
24132	1	1100110101 (1) 1110110101	false
24133	1	1100110101 (1) 1101110101	false
24134	1	1100110101 (1) 1100111101	false
24135	1	0011011110 (1) 0010011110	false
24136	1	0011011110 (1) 0011001110	false
24137	1	0011011110 (1) 0011010110	false
24138	1	0101100110 (1) 0001100110	false
24139	1	0101100110 (1) 0111100110	false
24140	1	0101100110 (1) 0101110110	false
24141	1	0101100110 (1) 0101100010	false
24142	1	0101100110 (1) 0101100100	false
24143	1	1011011110 (1) 1010011110	false
24144	1	1011011110 (1) 1011001110	false
24145	1	1011011110 (1) 1011010110	false
24146	1	1101100110 (1) 1111100110	false
24147	1	1101100110 (1) 1101110110	false
24148	1	1101100110 (1) 1101100010	false
24149	1	1101100110 (1) 1101100100	false
24150	1	1000111001 (1) 1010111001	false
24151	1	1000111001 (1) 1001111001	false
24152	1	1000111001 (1) 1000011001	false
24153	1	1000111001 (1) 1000111101	false
24154	1	1000110101 (1) 1010110101	false
24155	1	1000110101 (1) 1001110101	false
24156	1	1000110101 (1) 1000111101	false
24157	1	0000111001 (1) 0010111001	false
24158	1	0000111001 (1) 0001111001	false
24159	1	0000111001 (1) 0000011001	false
24160	1	0000111001 (1) 0000111101	false
24161	1	0000110101 (1) 0010110101	false
24162	1	0000110101 (1) 0001110101	false
24163	1	0000110101 (1) 0000111101	false
24164	1	0110001101 (1) 0010001101	false
24165	1	0110001101 (1) 0100001101	false
24166	1	0110001101 (1) 0110000101	false
24167	1	0110001101 (1) 0110001111	false
24168	1	0110001011 (1) 0010001011	false
24169	1	0110001011 (1) 0100001011	false
24170	1	0110001011 (1) 0110000011	false
24171	1	0110001011 (1) 0110001111	false
24172	1	0110001001 (1) 0010001001	false
24173	1	0110001001 (1) 0100001001	false
24174	1	0110001001 (1) 0110000001	false
24175	1	0110001001 (1) 0110001101	false
24176	1	0110001001 (1) 0110001011	false
24177	1	1110001101 (1) 1100001101	false
24178	1	1110001101 (1) 1110000101	false
24179	1	1110001101 (1) 1110001111	false
24180	1	1110001011 (1) 1100001011	false
24181	1	1110001011 (1) 1110000011	false
24182	1	1110001011 (1) 1110001111	false
24183	1	0001100110 (1) 0011100110	false
24184	1	0001100110 (1) 0001110110	false
24185	1	0001100110 (1) 0001100010	false
24186	1	0001100110 (1) 0001100100	false
24187	1	1001100110 (1) 1101100110	false
24188	1	1001100110 (1) 1011100110	false
24189	1	1001100110 (1) 1001110110	false
24190	1	1001100110 (1) 1001100010	false
24191	1	1001100110 (1) 1001100100	false
24192	1	0010001101 (1) 0010000101	false
24193	1	0010001101 (1) 0010001111	false
24194	1	0010001011 (1) 0000001011	false
24195	1	0010001011 (1) 0010000011	false
24196	1	0010001011 (1) 0010001111	false
24197	1	0010001001 (1) 0000001001	false
24198	1	0010001001 (1) 0010000001	false
24199	1	0010001001 (1) 0010001101	false
24200	1	0010001001 (1) 0010001011	false
24201	1	1110001001 (1) 1100001001	false
24202	1	1110001001 (1) 1110000001	false
24203	1	1110001001 (1) 1110001101	false
24204	1	1110001001 (1) 1110001011	false
24205	1	1010001101 (1) 1110001101	false
24206	1	1010001101 (1) 1010000101	false
24207	1	1010001101 (1) 1010001111	false
24208	1	1010001011 (1) 1110001011	false
24209	1	1010001011 (1) 1000001011	false
24210	1	1010001011 (1) 1010000011	false
24211	1	1010001011 (1) 1010001111	false
24212	1	1010001001 (1) 1110001001	false
24213	1	1010001001 (1) 1000001001	false
24214	1	1010001001 (1) 1010000001	false
24215	1	1010001001 (1) 1010001101	false
24216	1	1010001001 (1) 1010001011	false
24217	1	0110111010 (1) 0010111010	false
24218	1	0110111010 (1) 0110011010	false
24219	1	0110111010 (1) 0110110010	false
24220	1	0110111010 (1) 0110111110	false
24221	1	0110111010 (1) 0110111000	false
24222	1	1110111010 (1) 1010111010	false
24223	1	1110111010 (1) 1110011010	false
24224	1	1110111010 (1) 1110110010	false
24225	1	1110111010 (1) 1110111110	false
24226	1	1110111010 (1) 1110111000	false
24227	1	1111011001 (1) 1011011001	false
24228	1	1111011001 (1) 1101011001	false
24229	1	1111011001 (1) 1110011001	false
24230	1	1111011001 (1) 1111111001	false
24231	1	1111011001 (1) 1111001001	false
24232	1	1111011001 (1) 1111011101	false
24233	1	1111011001 (1) 1111011011	false
24234	1	1111010101 (1) 1011010101	false
24235	1	1111010101 (1) 1101010101	false
24236	1	1111010101 (1) 1110010101	false
24237	1	1111010101 (1) 1111110101	false
24238	1	1111010101 (1) 1111000101	false
24239	1	1111010101 (1) 1111011101	false
24240	1	1111010101 (1) 1111010111	false
24241	1	1111010011 (1) 1011010011	false
24242	1	1111010011 (1) 1101010011	false
24243	1	1111010011 (1) 1110010011	false
24244	1	1111010011 (1) 1111110011	false
24245	1	1111010011 (1) 1111000011	false
24246	1	1111010011 (1) 1111010111	false
24247	1	1111010001 (1) 1011010001	false
24248	1	1111010001 (1) 1101010001	false
24249	1	1111010001 (1) 1110010001	false
24250	1	1111010001 (1) 1111110001	false
24251	1	1111010001 (1) 1111000001	false
24252	1	1111010001 (1) 1111011001	false
24253	1	1111010001 (1) 1111010101	false
24254	1	1111010001 (1) 1111010011	false
24255	1	0111011001 (1) 0011011001	false
24256	1	0111011001 (1) 0101011001	false
24257	1	0111011001 (1) 0110011001	false
24258	1	0111011001 (1) 0111111001	false
24259	1	0111011001 (1) 0111001001	false
24260	1	0111011001 (1) 0111011101	false
24261	1	0111011001 (1) 0111011011	false
24262	1	0111010101 (1) 0011010101	false
24263	1	0111010101 (1) 0101010101	false
24264	1	0111010101 (1) 0110010101	false
24265	1	0111010101 (1) 0111110101	false
24266	1	0111010101 (1) 0111000101	false
24267	1	0111010101 (1) 0111011101	false
24268	1	0111010101 (1) 0111010111	false
24269	1	0111010011 (1) 0011010011	false
24270	1	0111010011 (1) 0101010011	false
24271	1	0111010011 (1) 0110010011	false
24272	1	0111010011 (1) 0111110011	false
24273	1	0111010011 (1) 0111000011	false
24274	1	0111010011 (1) 0111010111	false
24275	1	0111010001 (1) 0011010001	false
24276	1	0111010001 (1) 0101010001	false
24277	1	0111010001 (1) 0110010001	false
24278	1	0111010001 (1) 0111110001	false
24279	1	0111010001 (1) 0111000001	false
24280	1	0111010001 (1) 0111011001	false
24281	1	0111010001 (1) 0111010101	false
24282	1	0111010001 (1) 0111010011	false
24283	1	1010111010 (1) 1010011010	false
24284	1	1010111010 (1) 1010110010	false
24285	1	1010111010 (1) 1010111110	false
24286	1	1010111010 (1) 1010111000	false
24287	1	0101011110 (1) 0001011110	false
24288	1	0101011110 (1) 0101111110	false
24289	1	0101011110 (1) 0101001110	false
24290	1	0101011110 (1) 0101010110	false
24291	1	0010111010 (1) 0010011010	false
24292	1	0010111010 (1) 0010110010	false
24293	1	0010111010 (1) 0010111110	false
24294	1	0010111010 (1) 0010111000	false
24295	1	1101011110 (1) 1001011110	false
24296	1	1101011110 (1) 1101111110	false
24297	1	1101011110 (1) 1101001110	false
24298	1	1101011110 (1) 1101010110	false
24299	1	0011011001 (1) 0001011001	false
24300	1	0011011001 (1) 0010011001	false
24301	1	0011011001 (1) 0011001001	false
24302	1	0011011001 (1) 0011011101	false
24303	1	0011011001 (1) 0011011011	false
24304	1	0011010101 (1) 0010010101	false
24305	1	0011010101 (1) 0011110101	false
24306	1	0011010101 (1) 0011000101	false
24307	1	0011010101 (1) 0011011101	false
24308	1	0011010101 (1) 0011010111	false
24309	1	0011010011 (1) 0001010011	false
24310	1	0011010011 (1) 0010010011	false
24311	1	0011010011 (1) 0011000011	false
24312	1	0011010011 (1) 0011010111	false
24313	1	0011010001 (1) 0001010001	false
24314	1	0011010001 (1) 0010010001	false
24315	1	0011010001 (1) 0011000001	false
24316	1	0011010001 (1) 0011011001	false
24317	1	0011010001 (1) 0011010101	false
24318	1	0011010001 (1) 0011010011	false
24319	1	1011011001 (1) 1001011001	false
24320	1	1011011001 (1) 1010011001	false
24321	1	1011011001 (1) 1011001001	false
24322	1	1011011001 (1) 1011011101	false
24323	1	1011011001 (1) 1011011011	false
24324	1	1011010101 (1) 1010010101	false
24325	1	1011010101 (1) 1011110101	false
24326	1	1011010101 (1) 1011000101	false
24327	1	1011010101 (1) 1011011101	false
24328	1	1011010101 (1) 1011010111	false
24329	1	1011010011 (1) 1001010011	false
24330	1	1011010011 (1) 1010010011	false
24331	1	1011010011 (1) 1011000011	false
24332	1	1011010011 (1) 1011010111	false
24333	1	1011010001 (1) 1001010001	false
24334	1	1011010001 (1) 1010010001	false
24335	1	1011010001 (1) 1011000001	false
24336	1	1011010001 (1) 1011011001	false
24337	1	1011010001 (1) 1011010101	false
24338	1	1011010001 (1) 1011010011	false
24339	1	0001011110 (1) 0011011110	false
24340	1	0001011110 (1) 0001001110	false
24341	1	0001011110 (1) 0001010110	false
24342	1	1001011110 (1) 1011011110	false
24343	1	1001011110 (1) 1001001110	false
24344	1	1001011110 (1) 1001010110	false
24345	1	0101001001 (1) 0001001001	false
24346	1	0101001001 (1) 0101101001	false
24347	1	0101001001 (1) 0101000001	false
24348	1	0101001001 (1) 0101001101	false
24349	1	0101001001 (1) 0101001011	false
24350	1	0100001101 (1) 0000001101	false
24351	1	0100001101 (1) 0101001101	false
24352	1	0100001101 (1) 0100000101	false
24353	1	0100001101 (1) 0100001111	false
24354	1	0100001011 (1) 0000001011	false
24355	1	0100001011 (1) 0101001011	false
24356	1	0100001011 (1) 0100000011	false
24357	1	0100001011 (1) 0100001111	false
24358	1	0100001001 (1) 0000001001	false
24359	1	0100001001 (1) 0101001001	false
24360	1	0100001001 (1) 0100000001	false
24361	1	0100001001 (1) 0100001101	false
24362	1	0100001001 (1) 0100001011	false
24363	1	1101001001 (1) 1101101001	false
24364	1	1101001001 (1) 1101000001	false
24365	1	1101001001 (1) 1101001101	false
24366	1	1101001001 (1) 1101001011	false
24367	1	1100001101 (1) 1101001101	false
24368	1	1100001101 (1) 1100000101	false
24369	1	1100001101 (1) 1100001111	false
24370	1	1100001011 (1) 1101001011	false
24371	1	1100001011 (1) 1100000011	false
24372	1	1100001011 (1) 1100001111	false
24373	1	0110100110 (1) 0010100110	false
24374	1	0110100110 (1) 0110110110	false
24375	1	0110100110 (1) 0110100010	false
24376	1	0110100110 (1) 0110100100	false
24377	1	1110100110 (1) 1110110110	false
24378	1	1110100110 (1) 1110100010	false
24379	1	1110100110 (1) 1110100100	false
24380	1	0001001001 (1) 0001000001	false
24381	1	0001001001 (1) 0001001101	false
24382	1	0001001001 (1) 0001001011	false
24383	1	0000001101 (1) 0010001101	false
24384	1	0000001101 (1) 0001001101	false
24385	1	0000001101 (1) 0000000101	false
24386	1	0000001101 (1) 0000001111	false
24387	1	0000001011 (1) 0001001011	false
24388	1	0000001011 (1) 0000000011	false
24389	1	0000001011 (1) 0000001111	false
24390	1	0000001001 (1) 0001001001	false
24391	1	0000001001 (1) 0000000001	false
24392	1	0000001001 (1) 0000001101	false
24393	1	0000001001 (1) 0000001011	false
24394	1	1100001001 (1) 1101001001	false
24395	1	1100001001 (1) 1100000001	false
24396	1	1100001001 (1) 1100001101	false
24397	1	1100001001 (1) 1100001011	false
24398	1	1001001001 (1) 1101001001	false
24399	1	1001001001 (1) 1001000001	false
24400	1	1001001001 (1) 1001001101	false
24401	1	1001001001 (1) 1001001011	false
24402	1	1000001101 (1) 1100001101	false
24403	1	1000001101 (1) 1010001101	false
24404	1	1000001101 (1) 1001001101	false
24405	1	1000001101 (1) 1000000101	false
24406	1	1000001101 (1) 1000001111	false
24407	1	1000001011 (1) 1100001011	false
24408	1	1000001011 (1) 1001001011	false
24409	1	1000001011 (1) 1000000011	false
24410	1	1000001011 (1) 1000001111	false
24411	1	1000001001 (1) 1100001001	false
24412	1	1000001001 (1) 1001001001	false
24413	1	1000001001 (1) 1000000001	false
24414	1	1000001001 (1) 1000001101	false
24415	1	1000001001 (1) 1000001011	false
24416	1	0110101010 (1) 0010101010	false
24417	1	0110101010 (1) 0110001010	false
24418	1	0110101010 (1) 0110111010	false
24419	1	0110101010 (1) 0110100010	false
24420	1	0110101010 (1) 0110101000	false
24421	1	0100111010 (1) 0000111010	false
24422	1	0100111010 (1) 0110111010	false
24423	1	0100111010 (1) 0101111010	false
24424	1	0100111010 (1) 0100011010	false
24425	1	0100111010 (1) 0100110010	false
24426	1	0100111010 (1) 0100111110	false
24427	1	0100111010 (1) 0100111000	false
24428	1	0100101010 (1) 0000101010	false
24429	1	0100101010 (1) 0110101010	false
24430	1	0100101010 (1) 0101101010	false
24431	1	0100101010 (1) 0100001010	false
24432	1	0100101010 (1) 0100111010	false
24433	1	0100101010 (1) 0100100010	false
24434	1	0100101010 (1) 0100101000	false
24435	1	1110101010 (1) 1110001010	false
24436	1	1110101010 (1) 1110111010	false
24437	1	1110101010 (1) 1110100010	false
24438	1	1110101010 (1) 1110101000	false
24439	1	1100111010 (1) 1000111010	false
24440	1	1100111010 (1) 1110111010	false
24441	1	1100111010 (1) 1101111010	false
24442	1	1100111010 (1) 1100011010	false
24443	1	1100111010 (1) 1100110010	false
24444	1	1100111010 (1) 1100111110	false
24445	1	1100111010 (1) 1100111000	false
24446	1	0010100110 (1) 0010110110	false
24447	1	0010100110 (1) 0010100010	false
24448	1	0010100110 (1) 0010100100	false
24449	1	1010100110 (1) 1110100110	false
24450	1	1010100110 (1) 1010110110	false
24451	1	1010100110 (1) 1010100010	false
24452	1	1010100110 (1) 1010100100	false
24453	1	0101011001 (1) 0001011001	false
24454	1	0101011001 (1) 0101111001	false
24455	1	0101011001 (1) 0101001001	false
24456	1	0101011001 (1) 0101011101	false
24457	1	0101011001 (1) 0101011011	false
24458	1	0101010101 (1) 0001010101	false
24459	1	0101010101 (1) 0101110101	false
24460	1	0101010101 (1) 0101000101	false
24461	1	0101010101 (1) 0101011101	false
24462	1	0101010101 (1) 0101010111	false
24463	1	0101010011 (1) 0001010011	false
24464	1	0101010011 (1) 0101110011	false
24465	1	0101010011 (1) 0101000011	false
24466	1	0101010011 (1) 0101010111	false
24467	1	1101011001 (1) 1001011001	false
24468	1	1101011001 (1) 1101111001	false
24469	1	1101011001 (1) 1101001001	false
24470	1	1101011001 (1) 1101011101	false
24471	1	1101011001 (1) 1101011011	false
24472	1	1101010101 (1) 1001010101	false
24473	1	1101010101 (1) 1101110101	false
24474	1	1101010101 (1) 1101000101	false
24475	1	1101010101 (1) 1101011101	false
24476	1	1101010101 (1) 1101010111	false
24477	1	1101010011 (1) 1001010011	false
24478	1	1101010011 (1) 1101110011	false
24479	1	1101010011 (1) 1101000011	false
24480	1	1101010011 (1) 1101010111	false
24481	1	1100101010 (1) 1110101010	false
24482	1	1100101010 (1) 1101101010	false
24483	1	1100101010 (1) 1100001010	false
24484	1	1100101010 (1) 1100111010	false
24485	1	1100101010 (1) 1100100010	false
24486	1	1100101010 (1) 1100101000	false
24487	1	1010101010 (1) 1110101010	false
24488	1	1010101010 (1) 1010001010	false
24489	1	1010101010 (1) 1010111010	false
24490	1	1010101010 (1) 1010100010	false
24491	1	1010101010 (1) 1010101000	false
24492	1	1001101010 (1) 1101101010	false
24493	1	1001101010 (1) 1011101010	false
24494	1	1001101010 (1) 1001001010	false
24495	1	1001101010 (1) 1001111010	false
24496	1	1001101010 (1) 1001100010	false
24497	1	1001101010 (1) 1001101000	false
24498	1	1000111010 (1) 1010111010	false
24499	1	1000111010 (1) 1001111010	false
24500	1	1000111010 (1) 1000011010	false
24501	1	1000111010 (1) 1000110010	false
24502	1	1000111010 (1) 1000111110	false
24503	1	1000111010 (1) 1000111000	false
24504	1	1000101010 (1) 1100101010	false
24505	1	1000101010 (1) 1010101010	false
24506	1	1000101010 (1) 1001101010	false
24507	1	1000101010 (1) 1000001010	false
24508	1	1000101010 (1) 1000111010	false
24509	1	1000101010 (1) 1000100010	false
24510	1	1000101010 (1) 1000101000	false
24511	1	0010101010 (1) 0010001010	false
24512	1	0010101010 (1) 0010111010	false
24513	1	0010101010 (1) 0010100010	false
24514	1	0010101010 (1) 0010101000	false
24515	1	0001101010 (1) 0011101010	false
24516	1	0001101010 (1) 0001001010	false
24517	1	0001101010 (1) 0001111010	false
24518	1	0001101010 (1) 0001100010	false
24519	1	0001101010 (1) 0001101000	false
24520	1	0000111010 (1) 0010111010	false
24521	1	0000111010 (1) 0001111010	false
24522	1	0000111010 (1) 0000011010	false
24523	1	0000111010 (1) 0000110010	false
24524	1	0000111010 (1) 0000111110	false
24525	1	0000111010 (1) 0000111000	false
24526	1	0000101010 (1) 0010101010	false
24527	1	0000101010 (1) 0001101010	false
24528	1	0000101010 (1) 0000001010	false
24529	1	0000101010 (1) 0000111010	false
24530	1	0000101010 (1) 0000100010	false
24531	1	0000101010 (1) 0000101000	false
24532	1	0001011001 (1) 0001001001	false
24533	1	0001011001 (1) 0001011101	false
24534	1	0001011001 (1) 0001011011	false
24535	1	0001010101 (1) 0011010101	false
24536	1	0001010101 (1) 0001110101	false
24537	1	0001010101 (1) 0001000101	false
24538	1	0001010101 (1) 0001011101	false
24539	1	0001010101 (1) 0001010111	false
24540	1	0001010011 (1) 0001000011	false
24541	1	0001010011 (1) 0001010111	false
24542	1	1001011001 (1) 1001001001	false
24543	1	1001011001 (1) 1001011101	false
24544	1	1001011001 (1) 1001011011	false
24545	1	1001010101 (1) 1011010101	false
24546	1	1001010101 (1) 1001110101	false
24547	1	1001010101 (1) 1001000101	false
24548	1	1001010101 (1) 1001011101	false
24549	1	1001010101 (1) 1001010111	false
24550	1	1001010011 (1) 1001000011	false
24551	1	1001010011 (1) 1001010111	false
[truncated: 2,100 more rows]
