# Supplementary material
Source: publisher figshare collection journal article supplement (https://springernature.figshare.com/ndownloader/files/17562821)
Supplement: Supplementary file 1 [file 17562821 › CytoscapeSession-2018_09_25-21_15/tables/21522-STG%2C+Model+3/LOCAL_ATTRS-org.cytoscape.model.CyNode-STG%2C+Model+3+default++node.cytable]

CyCSV-Version	1
SUID	name	selected
java.lang.Long	java.lang.String	java.lang.Boolean
STG, Model 3 default node
21532	0111111111	false
21533	1111111111	false
21534	0011111111	false
21535	1011111111	false
21536	0101111111	false
21537	1101111111	false
21538	0001111111	false
21539	1001111111	false
21540	0110111111	false
21541	1110111111	false
21542	0010111111	false
21543	1010111111	false
21544	0100111111	false
21545	1100111111	false
21546	1000111111	false
21547	0000111111	false
21548	0111111011	false
21549	0111101111	false
21550	1111111011	false
21551	1111101111	false
21552	1011111011	false
21553	1011101111	false
21554	0011111011	false
21555	0011101111	false
21556	0101111011	false
21557	0101101111	false
21558	1101111011	false
21559	1101101111	false
21560	1011101011	false
21561	1001111011	false
21562	1001101111	false
21563	0011101011	false
21564	0001111011	false
21565	0001101111	false
21566	1111011111	false
21567	0111011111	false
21568	1011011111	false
21569	0011011111	false
21570	0110111011	false
21571	0110101111	false
21572	1110111011	false
21573	1110101111	false
21574	1010111011	false
21575	1010101111	false
21576	0010111011	false
21577	0010101111	false
21578	0101011111	false
21579	1101011111	false
21580	0111110111	false
21581	1111110111	false
21582	1001011111	false
21583	0001011111	false
21584	0011110111	false
21585	1011110111	false
21586	0110101011	false
21587	0100111011	false
21588	0100101111	false
21589	0100101011	false
21590	1110101011	false
21591	1100111011	false
21592	1100101111	false
21593	1100101011	false
21594	1010101011	false
21595	1001101011	false
21596	1000111011	false
21597	1000101111	false
21598	1000101011	false
21599	0010101011	false
21600	0001101011	false
21601	0000111011	false
21602	0000101111	false
21603	0000101011	false
21604	0101110111	false
21605	0110011111	false
21606	1101110111	false
21607	1110011111	false
21608	0111101011	false
21609	0001110111	false
21610	1001110111	false
21611	1111101011	false
21612	1010011111	false
21613	0010011111	false
21614	0100011111	false
21615	1100011111	false
21616	0110110111	false
21617	0101101011	false
21618	1110110111	false
21619	1101101011	false
21620	1000011111	false
21621	0000011111	false
21622	0010110111	false
21623	1010110111	false
21624	0100110111	false
21625	1100110111	false
21626	1000110111	false
21627	0000110111	false
21628	0111001111	false
21629	1111001111	false
21630	1011001111	false
21631	0011001111	false
21632	0101001111	false
21633	1101001111	false
21634	0111110011	false
21635	0111100111	false
21636	1111110011	false
21637	1111100111	false
21638	1001001111	false
21639	0001001111	false
21640	1011110011	false
21641	1011100111	false
21642	0011110011	false
21643	0011100111	false
21644	1011101110	false
21645	0011101110	false
21646	0111111101	false
21647	1111111101	false
21648	0011111101	false
21649	0101110011	false
21650	0101100111	false
21651	0110001111	false
21652	1011111101	false
21653	1101110011	false
21654	1101100111	false
21655	1110001111	false
21656	1011100011	false
21657	1001110011	false
21658	1001100111	false
21659	0011100011	false
21660	0001110011	false
21661	0001100111	false
21662	1010001111	false
21663	0010001111	false
21664	1111010111	false
21665	0111010111	false
21666	0011010111	false
21667	0101111101	false
21668	1011010111	false
21669	1101111101	false
21670	0001111101	false
21671	0100001111	false
21672	1001111101	false
21673	1100001111	false
21674	0110110011	false
21675	0110100111	false
21676	1110110011	false
21677	1110100111	false
21678	1000001111	false
21679	0000001111	false
21680	0110101110	false
21681	0100101110	false
21682	1110101110	false
21683	1010110011	false
21684	1010100111	false
21685	0010110011	false
21686	0010100111	false
21687	0101010111	false
21688	1101010111	false
21689	1100101110	false
21690	1010101110	false
21691	1001101110	false
21692	1000101110	false
21693	0010101110	false
21694	0001101110	false
21695	0000101110	false
21696	0001010111	false
21697	1001010111	false
21698	0110111101	false
21699	1110111101	false
21700	0111101110	false
21701	1111101110	false
21702	0110100011	false
21703	0100110011	false
21704	0100100111	false
21705	0100100011	false
21706	1110100011	false
21707	1100110011	false
21708	1100100111	false
21709	0010111101	false
21710	1010111101	false
21711	1100100011	false
21712	1010100011	false
21713	1001100011	false
21714	1000110011	false
21715	1000100111	false
21716	1000100011	false
21717	0010100011	false
21718	0001100011	false
21719	0000110011	false
21720	0000100111	false
21721	0000100011	false
21722	0110010111	false
21723	1110010111	false
21724	0010010111	false
21725	1111100011	false
21726	1010010111	false
21727	0111100011	false
21728	1100111101	false
21729	0100111101	false
21730	0101101110	false
21731	1101101110	false
21732	1000111101	false
21733	0000111101	false
21734	1111011101	false
21735	1111011011	false
21736	0111011101	false
21737	0111011011	false
21738	0100010111	false
21739	1100010111	false
21740	0011011101	false
21741	0011011011	false
21742	1011011101	false
21743	1011011011	false
21744	1000010111	false
21745	0101100011	false
21746	1101100011	false
21747	0000010111	false
21748	0111111110	false
21749	1111111110	false
21750	0011111110	false
21751	1011111110	false
21752	0101011101	false
21753	0101011011	false
21754	1101011101	false
21755	1101011011	false
21756	0001011101	false
21757	0001011011	false
21758	1001011101	false
21759	1001011011	false
21760	0101111110	false
21761	1101111110	false
21762	0001111110	false
21763	1001111110	false
21764	0111101101	false
21765	0110011101	false
21766	0110011011	false
21767	1111101101	false
21768	1110011101	false
21769	1110011011	false
21770	0011101101	false
21771	0010011101	false
21772	0010011011	false
21773	1010011101	false
21774	1010011011	false
21775	1011101101	false
21776	1110111110	false
21777	0110111110	false
21778	0010111110	false
21779	1010111110	false
21780	0111000111	false
21781	1111000111	false
21782	0100011101	false
21783	0100011011	false
21784	0101101101	false
21785	1101101101	false
21786	1100011101	false
21787	1100011011	false
21788	1011000111	false
21789	0011000111	false
21790	0111110110	false
21791	1111110110	false
21792	1011101001	false
21793	1001101101	false
21794	0011101001	false
21795	0001101101	false
21796	1000011101	false
21797	1000011011	false
21798	0100111110	false
21799	1100111110	false
21800	0011110110	false
21801	1011110110	false
21802	0000011101	false
21803	0000011011	false
21804	1000111110	false
21805	0000111110	false
21806	0101000111	false
21807	1101000111	false
21808	0001000111	false
21809	0101110110	false
21810	1001000111	false
21811	1101110110	false
21812	0110101101	false
21813	1110101101	false
21814	0001110110	false
21815	1001110110	false
21816	1010101101	false
21817	0010101101	false
21818	0111111001	false
21819	0111110101	false
21820	1111111001	false
21821	1111110101	false
21822	0011111001	false
21823	0011110101	false
21824	0110000111	false
21825	1011111001	false
21826	1011110101	false
21827	1110000111	false
21828	0110101001	false
21829	0100101101	false
21830	0100101001	false
21831	1110101001	false
21832	1100101101	false
21833	1010000111	false
21834	0010000111	false
21835	0110110110	false
21836	1110110110	false
21837	1100101001	false
21838	1010101001	false
21839	1001101001	false
21840	1000101101	false
21841	1000101001	false
21842	0010101001	false
21843	0001101001	false
21844	0000101101	false
21845	0000101001	false
21846	0010110110	false
21847	1010110110	false
21848	0101111001	false
21849	0101110101	false
21850	1101111001	false
21851	1101110101	false
21852	0111101001	false
21853	0111001101	false
21854	0111001011	false
21855	0111001001	false
21856	0001111001	false
21857	0001110101	false
21858	0100000111	false
21859	1001111001	false
21860	1001110101	false
21861	1111101001	false
21862	1111001101	false
21863	1111001011	false
21864	1100000111	false
21865	0000000111	false
21866	0111111010	false
21867	0011001101	false
21868	0011001011	false
21869	0011001001	false
21870	1000000111	false
21871	1111001001	false
21872	1011001101	false
21873	1011001011	false
21874	1011001001	false
21875	0100110110	false
21876	1111111010	false
21877	1100110110	false
21878	1011111010	false
21879	0011111010	false
21880	0000110110	false
21881	1000110110	false
21882	0101101001	false
21883	0101001101	false
21884	0101001011	false
21885	0110111001	false
21886	0110110101	false
21887	1101101001	false
21888	1101001101	false
21889	1101001011	false
21890	1110111001	false
21891	1110110101	false
21892	0111100110	false
21893	1111100110	false
21894	0010111001	false
21895	0010110101	false
21896	1010111001	false
21897	1010110101	false
21898	0001001101	false
21899	0001001011	false
21900	0011100110	false
21901	0101111010	false
21902	1011100110	false
21903	1001001101	false
21904	1001001011	false
21905	1101111010	false
21906	1011101010	false
21907	1001111010	false
21908	0011101010	false
21909	0001111010	false
21910	1111011110	false
21911	0111011110	false
21912	0100111001	false
21913	0100110101	false
21914	1100111001	false
21915	1100110101	false
21916	0011011110	false
21917	0101100110	false
21918	1011011110	false
21919	1101100110	false
21920	1000111001	false
21921	1000110101	false
21922	0000111001	false
21923	0000110101	false
21924	0110001101	false
21925	0110001011	false
21926	0110001001	false
21927	1110001101	false
21928	1110001011	false
21929	0001100110	false
21930	1001100110	false
21931	0010001101	false
21932	0010001011	false
21933	0010001001	false
21934	1110001001	false
21935	1010001101	false
21936	1010001011	false
21937	1010001001	false
21938	0110111010	false
21939	1110111010	false
21940	1111011001	false
21941	1111010101	false
21942	1111010011	false
21943	1111010001	false
21944	0111011001	false
21945	0111010101	false
21946	0111010011	false
21947	0111010001	false
21948	1010111010	false
21949	0101011110	false
21950	0010111010	false
21951	1101011110	false
21952	0011011001	false
21953	0011010101	false
21954	0011010011	false
21955	0011010001	false
21956	1011011001	false
21957	1011010101	false
21958	1011010011	false
21959	1011010001	false
21960	0001011110	false
21961	1001011110	false
21962	0101001001	false
21963	0100001101	false
21964	0100001011	false
21965	0100001001	false
21966	1101001001	false
21967	1100001101	false
21968	1100001011	false
21969	0110100110	false
21970	1110100110	false
21971	0001001001	false
21972	0000001101	false
21973	0000001011	false
21974	0000001001	false
21975	1100001001	false
21976	1001001001	false
21977	1000001101	false
21978	1000001011	false
21979	1000001001	false
21980	0110101010	false
21981	0100111010	false
21982	0100101010	false
21983	1110101010	false
21984	1100111010	false
21985	0010100110	false
21986	1010100110	false
21987	0101011001	false
21988	0101010101	false
21989	0101010011	false
21990	1101011001	false
21991	1101010101	false
21992	1101010011	false
21993	1100101010	false
21994	1010101010	false
21995	1001101010	false
21996	1000111010	false
21997	1000101010	false
21998	0010101010	false
21999	0001101010	false
22000	0000111010	false
22001	0000101010	false
22002	0001011001	false
22003	0001010101	false
22004	0001010011	false
22005	1001011001	false
22006	1001010101	false
22007	1001010011	false
22008	0110011110	false
22009	1110011110	false
22010	0111101010	false
22011	0010011110	false
22012	0100100110	false
22013	1111101010	false
22014	1010011110	false
22015	1100100110	false
22016	0000100110	false
22017	1000100110	false
22018	0111110001	false
22019	0111100101	false
22020	0110011001	false
22021	0110010101	false
22022	0110010011	false
22023	0110010001	false
22024	1111110001	false
22025	1111100101	false
22026	1110011001	false
22027	1110010101	false
22028	1110010011	false
22029	1110010001	false
22030	0100011110	false
22031	1100011110	false
22032	0011110001	false
22033	0011100101	false
22034	1011110001	false
22035	1011100101	false
22036	0010011001	false
22037	0010010101	false
22038	0010010011	false
22039	0010010001	false
22040	1010011001	false
22041	1010010101	false
22042	1010010011	false
22043	1010010001	false
22044	1011101100	false
22045	0011101100	false
22046	0000011110	false
22047	0101101010	false
22048	1101101010	false
22049	1000011110	false
22050	0101010001	false
22051	0100011001	false
22052	0100010101	false
22053	0100010011	false
22054	0100010001	false
22055	0101110001	false
22056	0101100101	false
22057	1101010001	false
22058	1100011001	false
22059	1100010101	false
22060	1100010011	false
22061	1100010001	false
22062	1101110001	false
22063	1101100101	false
22064	1011100001	false
22065	1001110001	false
22066	1001100101	false
22067	0011100001	false
22068	0001110001	false
22069	0001100101	false
22070	0001010001	false
22071	0000011001	false
22072	0000010101	false
22073	0000010011	false
22074	0000010001	false
22075	1001010001	false
22076	1000011001	false
22077	1000010101	false
22078	1000010011	false
22079	1000010001	false
22080	0110110001	false
22081	0110100101	false
22082	1110110001	false
22083	1110100101	false
22084	0110101100	false
22085	0100101100	false
22086	1110101100	false
22087	1010110001	false
22088	1010100101	false
22089	0010110001	false
22090	0010100101	false
22091	1100101100	false
22092	1010101100	false
22093	1001101100	false
22094	1000101100	false
22095	0010101100	false
22096	0001101100	false
22097	0000101100	false
22098	0111101100	false
22099	0111001110	false
22100	0111001100	false
22101	1111101100	false
22102	1111001110	false
22103	0110100001	false
22104	0100110001	false
22105	0100100101	false
22106	0100100001	false
22107	1110100001	false
22108	1100110001	false
22109	1100100101	false
22110	0011001110	false
22111	1111001100	false
22112	1011001110	false
22113	1100100001	false
22114	1010100001	false
22115	1001100001	false
22116	1000110001	false
22117	1000100101	false
22118	1000100001	false
22119	0010100001	false
22120	0001100001	false
22121	0000110001	false
22122	0000100101	false
22123	0000100001	false
22124	0111100001	false
22125	0111000101	false
22126	0111000011	false
22127	0111000001	false
22128	1111100001	false
22129	1111000101	false
22130	1111000011	false
22131	0101101100	false
22132	0101001110	false
22133	1101101100	false
22134	1101001110	false
22135	1111000001	false
22136	1011000101	false
22137	1011000011	false
22138	1011000001	false
22139	0111110010	false
22140	0011001100	false
22141	0001001110	false
22142	1011001100	false
22143	1001001110	false
22144	1111110010	false
22145	0011000101	false
22146	0011000011	false
22147	0011000001	false
22148	0011110010	false
22149	1011110010	false
22150	0101100001	false
22151	0101000101	false
22152	0101000011	false
22153	1101100001	false
22154	1101000101	false
22155	1101000011	false
22156	0111111100	false
22157	1111111100	false
22158	0011111100	false
22159	0110001110	false
22160	0110001100	false
22161	0101110010	false
22162	1011111100	false
22163	1001000101	false
22164	1001000011	false
22165	0001000101	false
22166	0001000011	false
22167	1101110010	false
22168	1110001110	false
22169	0011100010	false
22170	0001110010	false
22171	0010001110	false
22172	1011100010	false
22173	1001110010	false
22174	1110001100	false
22175	1010001110	false
22176	1111010110	false
22177	1111010100	false
22178	0111010110	false
22179	0111010100	false
22180	1011010110	false
22181	0011010110	false
22182	0101111100	false
22183	1101111100	false
22184	0110000101	false
22185	0110000011	false
22186	0110000001	false
22187	1110000101	false
22188	1110000011	false
22189	0001111100	false
22190	0101001100	false
22191	0100001110	false
22192	0100001100	false
22193	1001111100	false
22194	1101001100	false
22195	1100001110	false
22196	0010000101	false
22197	0010000011	false
22198	0010000001	false
22199	1110000001	false
22200	1010000101	false
22201	1010000011	false
22202	1010000001	false
22203	0110110010	false
22204	0010001100	false
22205	0001001100	false
22206	0000001110	false
22207	0000001100	false
22208	1100001100	false
22209	1010001100	false
22210	1001001100	false
22211	1000001110	false
22212	1000001100	false
22213	1110110010	false
22214	1101010110	false
22215	0101010110	false
22216	0010110010	false
22217	1010110010	false
22218	1011010100	false
22219	1001010110	false
22220	0011010100	false
22221	0001010110	false
22222	0101000001	false
22223	0100000101	false
22224	0100000011	false
22225	0100000001	false
22226	1101000001	false
22227	1100000101	false
22228	1100000011	false
22229	0110111100	false
22230	1110111100	false
22231	1100000001	false
22232	1001000001	false
22233	1000000101	false
22234	1000000011	false
22235	1000000001	false
22236	0001000001	false
22237	0000000101	false
22238	0000000011	false
22239	0000000001	false
22240	0110100010	false
22241	0100110010	false
22242	0100100010	false
22243	0010111100	false
22244	1110100010	false
22245	1100110010	false
22246	1010111100	false
22247	0010100010	false
22248	0001100010	false
22249	0000110010	false
22250	0000100010	false
22251	1100100010	false
22252	1010100010	false
22253	1001100010	false
22254	1000110010	false
22255	1000100010	false
22256	1110010110	false
22257	1110010100	false
22258	0110010110	false
22259	0110010100	false
22260	0111110100	false
22261	1111110100	false
22262	1010010110	false
22263	0010010110	false
22264	0111100010	false
22265	0011110100	false
22266	0100111100	false
22267	1011110100	false
22268	1111100010	false
22269	1100111100	false
22270	0000111100	false
22271	1000111100	false
22272	1101010100	false
22273	1100010110	false
22274	1100010100	false
22275	0101010100	false
22276	0100010110	false
22277	0100010100	false
22278	1111011100	false
22279	1111011010	false
22280	0111011100	false
22281	0111011010	false
22282	0101110100	false
22283	1101110100	false
22284	1010010100	false
22285	1001010100	false
22286	1000010110	false
22287	1000010100	false
22288	0010010100	false
22289	0001010100	false
22290	0000010110	false
22291	0000010100	false
22292	0011011100	false
22293	0011011010	false
22294	0001110100	false
22295	0101100010	false
22296	1011011100	false
22297	1011011010	false
22298	1001110100	false
22299	1101100010	false
22300	0101011100	false
22301	0101011010	false
22302	1101011100	false
22303	1101011010	false
22304	0110110100	false
22305	0001011100	false
22306	0001011010	false
22307	1001011100	false
22308	1001011010	false
22309	1110110100	false
22310	0010110100	false
22311	1010110100	false
22312	0100110100	false
22313	0110011100	false
22314	0110011010	false
22315	1100110100	false
22316	1110011100	false
22317	1110011010	false
22318	0000110100	false
22319	0010011100	false
22320	0010011010	false
22321	1000110100	false
22322	1010011100	false
22323	1010011010	false
22324	0111100100	false
22325	0111000110	false
22326	0111000100	false
22327	1111100100	false
22328	1111000110	false
22329	0011100100	false
22330	0011000110	false
22331	0100011100	false
22332	0100011010	false
22333	1111000100	false
22334	1011100100	false
22335	1011000110	false
22336	1100011100	false
22337	1100011010	false
22338	1011101000	false
22339	0011101000	false
22340	0000011100	false
22341	0000011010	false
22342	1000011100	false
22343	1000011010	false
22344	0101100100	false
22345	0101000110	false
22346	1101100100	false
22347	1101000110	false
22348	0011000100	false
22349	0001100100	false
22350	0001000110	false
22351	1011000100	false
22352	1001100100	false
22353	1001000110	false
22354	0111111000	false
22355	1111111000	false
22356	0110100100	false
22357	0110000110	false
22358	0110000100	false
22359	0011111000	false
22360	1011111000	false
22361	1110100100	false
22362	1110000110	false
22363	0110101000	false
22364	0100101000	false
22365	1110101000	false
22366	0010100100	false
22367	0010000110	false
22368	1110000100	false
22369	1010100100	false
22370	1010000110	false
22371	1100101000	false
22372	1010101000	false
22373	1001101000	false
22374	1000101000	false
22375	0010101000	false
22376	0001101000	false
22377	0000101000	false
22378	0101111000	false
22379	1101111000	false
22380	0111101000	false
22381	0111001010	false
22382	0111001000	false
22383	0101000100	false
22384	0100100100	false
22385	0100000110	false
22386	0100000100	false
22387	0001111000	false
22388	1111101000	false
22389	1111001010	false
22390	1001111000	false
22391	1101000100	false
22392	1100100100	false
22393	1100000110	false
22394	0010000100	false
22395	0001000100	false
22396	0000100100	false
22397	0000000110	false
22398	0000000100	false
22399	0011001010	false
22400	0011001000	false
22401	1100000100	false
22402	1010000100	false
22403	1001000100	false
22404	1000100100	false
22405	1000000110	false
22406	1000000100	false
22407	1111001000	false
22408	1011001010	false
22409	1011001000	false
22410	0101101000	false
22411	0101001010	false
22412	0110111000	false
22413	1101101000	false
22414	1101001010	false
22415	1110111000	false
22416	0001001010	false
22417	0010111000	false
22418	1001001010	false
22419	1010111000	false
22420	0100111000	false
22421	1100111000	false
22422	0110001010	false
22423	0110001000	false
22424	0000111000	false
22425	1000111000	false
22426	1110001010	false
22427	0010001010	false
22428	0010001000	false
22429	1110001000	false
22430	1010001010	false
22431	1010001000	false
22432	1111011000	false
22433	1111010010	false
22434	1111010000	false
22435	0111011000	false
22436	0111010010	false
22437	0111010000	false
22438	0011011000	false
22439	0011010010	false
22440	0011010000	false
22441	1011011000	false
22442	1011010010	false
22443	1011010000	false
22444	0101001000	false
22445	0100001010	false
22446	0100001000	false
22447	1101001000	false
22448	1100001010	false
22449	0001001000	false
22450	0000001010	false
22451	0000001000	false
22452	1100001000	false
22453	1001001000	false
22454	1000001010	false
22455	1000001000	false
22456	0101011000	false
22457	0101010010	false
22458	1101011000	false
22459	1101010010	false
22460	0001011000	false
22461	0001010010	false
22462	1001011000	false
22463	1001010010	false
22464	0110011000	false
22465	0110010010	false
22466	0110010000	false
22467	0111110000	false
22468	1110011000	false
22469	1110010010	false
22470	1110010000	false
22471	1111110000	false
22472	0010011000	false
22473	0010010010	false
22474	0010010000	false
22475	0011110000	false
22476	1010011000	false
22477	1010010010	false
22478	1010010000	false
22479	1011110000	false
22480	0101010000	false
22481	0100011000	false
22482	0100010010	false
22483	0100010000	false
22484	0101110000	false
22485	1101010000	false
22486	1100011000	false
22487	1100010010	false
22488	1100010000	false
22489	1101110000	false
22490	0001010000	false
22491	0000011000	false
22492	0000010010	false
22493	0000010000	false
22494	0011100000	false
22495	0001110000	false
22496	1001010000	false
22497	1000011000	false
22498	1000010010	false
22499	1000010000	false
22500	1011100000	false
22501	1001110000	false
22502	0110110000	false
22503	1110110000	false
22504	0010110000	false
22505	1010110000	false
22506	0110100000	false
22507	0100110000	false
22508	0100100000	false
22509	1110100000	false
22510	1100110000	false
22511	0010100000	false
22512	0001100000	false
22513	0000110000	false
22514	0000100000	false
22515	1100100000	false
22516	1010100000	false
22517	1001100000	false
22518	1000110000	false
22519	1000100000	false
22520	0111100000	false
22521	0111000010	false
22522	0111000000	false
22523	1111100000	false
22524	1111000010	false
22525	0011000010	false
22526	0011000000	false
22527	1111000000	false
22528	1011000010	false
22529	1011000000	false
22530	0101100000	false
22531	0101000010	false
22532	1101100000	false
22533	1101000010	false
22534	1001000010	false
22535	0001000010	false
22536	0110000010	false
22537	0110000000	false
22538	1110000010	false
22539	0010000010	false
22540	0010000000	false
22541	1110000000	false
22542	1010000010	false
22543	1010000000	false
22544	0101000000	false
22545	0100000010	false
22546	0100000000	false
22547	1101000000	false
22548	1100000010	false
22549	1100000000	false
22550	1001000000	false
22551	1000000010	false
22552	1000000000	false
22553	0001000000	false
22554	0000000010	false
22555	0000000000	false
