# Supplementary material
Source: publisher figshare collection journal article supplement (https://springernature.figshare.com/ndownloader/files/17562821)
Supplement: Supplementary file 1 [file 17562821 › CytoscapeSession-2018_09_25-21_15/tables/26652-STG%2C+Model+2/SHARED_ATTRS-org.cytoscape.model.CyEdge-STG%2C+Model+2+root+shared++edge.cytable]

CyCSV-Version	1
SUID	shared interaction	shared name
java.lang.Long	java.lang.String	java.lang.String
STG, Model 2 root shared edge
31797	1	0000000000 (1) 0000000010
31796	1	0000000000 (1) 0001000000
31793	1	1000000000 (1) 1000000010
31792	1	1000000000 (1) 1001000000
31791	1	1000000000 (1) 1100000000
31786	1	1100000000 (1) 1100000010
31785	1	1100000000 (1) 1101000000
31781	1	0100000000 (1) 0100000010
31780	1	0100000000 (1) 0101000000
31779	1	0100000000 (1) 0000000000
31773	1	1010000000 (1) 1010000010
31772	1	1010000000 (1) 1000000000
31771	1	1010000000 (1) 1110000000
31766	1	0010000000 (1) 0010000010
31765	1	0010000000 (1) 0000000000
31768	1	1110000000 (1) 1110000010
31767	1	1110000000 (1) 1100000000
31762	1	0110000000 (1) 0110000010
31761	1	0110000000 (1) 0100000000
31760	1	0110000000 (1) 0010000000
31794	1	0001000000 (1) 0001000010
31788	1	1001000000 (1) 1001000010
31787	1	1001000000 (1) 1101000000
31783	1	1101000000 (1) 1101000010
31782	1	1101000000 (1) 1101100000
31776	1	0101000000 (1) 0101000010
31775	1	0101000000 (1) 0101100000
31774	1	0101000000 (1) 0001000000
31750	1	1011000000 (1) 1011000010
31749	1	1011000000 (1) 1010000000
31748	1	1011000000 (1) 1001000000
31747	1	1011000000 (1) 1111000000
31739	1	0011000000 (1) 0011000010
31738	1	0011000000 (1) 0010000000
31737	1	0011000000 (1) 0001000000
31743	1	1111000000 (1) 1111000010
31742	1	1111000000 (1) 1111100000
31741	1	1111000000 (1) 1110000000
31740	1	1111000000 (1) 1101000000
31728	1	0111000000 (1) 0111000010
31727	1	0111000000 (1) 0111100000
31726	1	0111000000 (1) 0110000000
31725	1	0111000000 (1) 0101000000
31724	1	0111000000 (1) 0011000000
31715	1	1000100000 (1) 1000110000
31714	1	1000100000 (1) 1000000000
31713	1	1000100000 (1) 1001100000
31712	1	1000100000 (1) 1010100000
31711	1	1000100000 (1) 1100100000
31696	1	0000100000 (1) 0000110000
31695	1	0000100000 (1) 0000000000
31694	1	0000100000 (1) 0001100000
31693	1	0000100000 (1) 0010100000
31699	1	1100100000 (1) 1100110000
31698	1	1100100000 (1) 1100000000
31697	1	1100100000 (1) 1101100000
31679	1	0100100000 (1) 0100110000
31678	1	0100100000 (1) 0100000000
31677	1	0100100000 (1) 0101100000
31676	1	0100100000 (1) 0000100000
31702	1	1010100000 (1) 1010110000
31701	1	1010100000 (1) 1010000000
31700	1	1010100000 (1) 1110100000
31685	1	0010100000 (1) 0010110000
31684	1	0010100000 (1) 0010000000
31669	1	1110100000 (1) 1110110000
31668	1	1110100000 (1) 1110000000
31667	1	1110100000 (1) 1100100000
31660	1	0110100000 (1) 0110110000
31659	1	0110100000 (1) 0110000000
31658	1	0110100000 (1) 0100100000
31657	1	0110100000 (1) 0010100000
31706	1	1001100000 (1) 1001110000
31705	1	1001100000 (1) 1001000000
31704	1	1001100000 (1) 1011100000
31703	1	1001100000 (1) 1101100000
31645	1	1000010000 (1) 1000010010
31644	1	1000010000 (1) 1000011000
31643	1	1000010000 (1) 1000000000
31642	1	1000010000 (1) 1001010000
31688	1	0001100000 (1) 0001110000
31687	1	0001100000 (1) 0001000000
31686	1	0001100000 (1) 0011100000
31626	1	0000010000 (1) 0000010010
31625	1	0000010000 (1) 0000011000
31624	1	0000010000 (1) 0000000000
31623	1	0000010000 (1) 0001010000
31755	1	1101100000 (1) 1101110000
31611	1	1100010000 (1) 1100010010
31610	1	1100010000 (1) 1100011000
31609	1	1100010000 (1) 1100000000
31608	1	1100010000 (1) 1101010000
31607	1	1100010000 (1) 1000010000
31752	1	0101100000 (1) 0101110000
31751	1	0101100000 (1) 0001100000
31591	1	0100010000 (1) 0100010010
31590	1	0100010000 (1) 0100011000
31589	1	0100010000 (1) 0100000000
31588	1	0100010000 (1) 0101010000
31587	1	0100010000 (1) 0000010000
31649	1	1011100000 (1) 1011110000
31648	1	1011100000 (1) 1011000000
31647	1	1011100000 (1) 1010100000
31646	1	1011100000 (1) 1111100000
31570	1	1010010000 (1) 1010010010
31569	1	1010010000 (1) 1010011000
31568	1	1010010000 (1) 1010000000
31567	1	1010010000 (1) 1000010000
31629	1	0011100000 (1) 0011110000
31628	1	0011100000 (1) 0011000000
31627	1	0011100000 (1) 0010100000
31557	1	0010010000 (1) 0010010010
31556	1	0010010000 (1) 0010011000
31555	1	0010010000 (1) 0010000000
31554	1	0010010000 (1) 0000010000
31731	1	1111100000 (1) 1111110000
31730	1	1111100000 (1) 1110100000
31729	1	1111100000 (1) 1101100000
31543	1	1110010000 (1) 1110010010
31542	1	1110010000 (1) 1110011000
31541	1	1110010000 (1) 1110000000
31540	1	1110010000 (1) 1100010000
31539	1	1110010000 (1) 1010010000
31719	1	0111100000 (1) 0111110000
31718	1	0111100000 (1) 0110100000
31717	1	0111100000 (1) 0101100000
31716	1	0111100000 (1) 0011100000
31526	1	0110010000 (1) 0110010010
31525	1	0110010000 (1) 0110011000
31524	1	0110010000 (1) 0110000000
31523	1	0110010000 (1) 0100010000
31522	1	0110010000 (1) 0010010000
31635	1	1001010000 (1) 1001010010
31634	1	1001010000 (1) 1001011000
31633	1	1001010000 (1) 1001000000
31616	1	0001010000 (1) 0001010010
31615	1	0001010000 (1) 0001011000
31614	1	0001010000 (1) 0001000000
31598	1	1101010000 (1) 1101010010
31597	1	1101010000 (1) 1101011000
31596	1	1101010000 (1) 1101000000
31595	1	1101010000 (1) 1101110000
31594	1	1101010000 (1) 1001010000
31578	1	0101010000 (1) 0101010010
31577	1	0101010000 (1) 0101011000
31576	1	0101010000 (1) 0101000000
31575	1	0101010000 (1) 0101110000
31574	1	0101010000 (1) 0001010000
31489	1	1000001000 (1) 1000001010
31488	1	1000001000 (1) 1000000000
31487	1	1000001000 (1) 1001001000
31486	1	1000001000 (1) 1100001000
31476	1	0000001000 (1) 0000001010
31475	1	0000001000 (1) 0000000000
31474	1	0000001000 (1) 0001001000
31479	1	1100001000 (1) 1100001010
31478	1	1100001000 (1) 1100000000
31477	1	1100001000 (1) 1101001000
31464	1	0100001000 (1) 0100001010
31463	1	0100001000 (1) 0100000000
31462	1	0100001000 (1) 0101001000
31461	1	0100001000 (1) 0000001000
31453	1	1011010000 (1) 1011010010
31452	1	1011010000 (1) 1011011000
31451	1	1011010000 (1) 1011000000
31450	1	1011010000 (1) 1010010000
31449	1	1011010000 (1) 1001010000
31440	1	0011010000 (1) 0011010010
31439	1	0011010000 (1) 0011011000
31438	1	0011010000 (1) 0011000000
31437	1	0011010000 (1) 0010010000
31436	1	0011010000 (1) 0001010000
31427	1	0111010000 (1) 0111010010
31426	1	0111010000 (1) 0111011000
31425	1	0111010000 (1) 0111000000
31424	1	0111010000 (1) 0111110000
31423	1	0111010000 (1) 0110010000
31422	1	0111010000 (1) 0101010000
31421	1	0111010000 (1) 0011010000
31408	1	1111010000 (1) 1111010010
31407	1	1111010000 (1) 1111011000
31406	1	1111010000 (1) 1111000000
31405	1	1111010000 (1) 1111110000
31404	1	1111010000 (1) 1110010000
31403	1	1111010000 (1) 1101010000
31402	1	1111010000 (1) 1011010000
31389	1	1010001000 (1) 1010001010
31388	1	1010001000 (1) 1010000000
31387	1	1010001000 (1) 1000001000
31386	1	1010001000 (1) 1110001000
31379	1	0010001000 (1) 0010001010
31378	1	0010001000 (1) 0010000000
31377	1	0010001000 (1) 0000001000
31710	1	1000110000 (1) 1000111000
31709	1	1000110000 (1) 1000010000
31708	1	1000110000 (1) 1001110000
31707	1	1000110000 (1) 1010110000
31382	1	1110001000 (1) 1110001010
31381	1	1110001000 (1) 1110000000
31380	1	1110001000 (1) 1100001000
31692	1	0000110000 (1) 0000111000
31691	1	0000110000 (1) 0000010000
31690	1	0000110000 (1) 0001110000
31689	1	0000110000 (1) 0010110000
31364	1	0110001000 (1) 0110001010
31363	1	0110001000 (1) 0110000000
31362	1	0110001000 (1) 0100001000
31361	1	0110001000 (1) 0010001000
31683	1	1100110000 (1) 1100111000
31682	1	1100110000 (1) 1100010000
31681	1	1100110000 (1) 1101110000
31680	1	1100110000 (1) 1000110000
31675	1	0100110000 (1) 0100111000
31674	1	0100110000 (1) 0100010000
31673	1	0100110000 (1) 0101110000
31672	1	0100110000 (1) 0000110000
31671	1	1010110000 (1) 1010111000
31670	1	1010110000 (1) 1010010000
31482	1	1001001000 (1) 1001001010
31481	1	1001001000 (1) 1001000000
31480	1	1001001000 (1) 1101001000
31666	1	0010110000 (1) 0010111000
31665	1	0010110000 (1) 0010010000
31471	1	0001001000 (1) 0001001010
31470	1	0001001000 (1) 0001000000
31664	1	1110110000 (1) 1110111000
31663	1	1110110000 (1) 1110010000
31662	1	1110110000 (1) 1100110000
31661	1	1110110000 (1) 1010110000
31467	1	1101001000 (1) 1101001010
31466	1	1101001000 (1) 1101000000
31465	1	1101001000 (1) 1101101000
31656	1	0110110000 (1) 0110111000
31655	1	0110110000 (1) 0110010000
31654	1	0110110000 (1) 0100110000
31653	1	0110110000 (1) 0010110000
31457	1	0101001000 (1) 0101001010
31456	1	0101001000 (1) 0101000000
31455	1	0101001000 (1) 0101101000
31454	1	0101001000 (1) 0001001000
31324	1	1000000100 (1) 1000000110
31323	1	1000000100 (1) 1000000000
31322	1	1000000100 (1) 1000100100
31321	1	1000000100 (1) 1001000100
31320	1	1000000100 (1) 1010000100
31319	1	1000000100 (1) 1100000100
31295	1	1011001000 (1) 1011001010
31294	1	1011001000 (1) 1011000000
31293	1	1011001000 (1) 1010001000
31292	1	1011001000 (1) 1001001000
31291	1	1011001000 (1) 1111001000
31281	1	0000000100 (1) 0000000110
31280	1	0000000100 (1) 0000000000
31279	1	0000000100 (1) 0000100100
31278	1	0000000100 (1) 0001000100
31277	1	0000000100 (1) 0010000100
31261	1	0011001000 (1) 0011001010
31260	1	0011001000 (1) 0011000000
31259	1	0011001000 (1) 0010001000
31258	1	0011001000 (1) 0001001000
31652	1	1001110000 (1) 1001111000
31651	1	1001110000 (1) 1001010000
31650	1	1001110000 (1) 1011110000
31299	1	1100000100 (1) 1100000110
31298	1	1100000100 (1) 1100000000
31297	1	1100000100 (1) 1100100100
31296	1	1100000100 (1) 1101000100
31286	1	1111001000 (1) 1111001010
31285	1	1111001000 (1) 1111000000
31284	1	1111001000 (1) 1111101000
31283	1	1111001000 (1) 1110001000
31282	1	1111001000 (1) 1101001000
31632	1	0001110000 (1) 0001111000
31631	1	0001110000 (1) 0001010000
31630	1	0001110000 (1) 0011110000
31230	1	0100000100 (1) 0100000110
31229	1	0100000100 (1) 0100000000
31228	1	0100000100 (1) 0100100100
31227	1	0100000100 (1) 0101000100
31226	1	0100000100 (1) 0000000100
31212	1	0111001000 (1) 0111001010
31211	1	0111001000 (1) 0111000000
31210	1	0111001000 (1) 0111101000
31209	1	0111001000 (1) 0110001000
31208	1	0111001000 (1) 0101001000
31207	1	0111001000 (1) 0011001000
31613	1	1101110000 (1) 1101111000
31612	1	1101110000 (1) 1001110000
31593	1	0101110000 (1) 0101111000
31592	1	0101110000 (1) 0001110000
31192	1	0000101000 (1) 0000100000
31191	1	0000101000 (1) 0000111000
31190	1	0000101000 (1) 0000001000
31189	1	0000101000 (1) 0001101000
31188	1	0000101000 (1) 0010101000
31180	1	1000101000 (1) 1000100000
31179	1	1000101000 (1) 1000111000
31178	1	1000101000 (1) 1000001000
31177	1	1000101000 (1) 1001101000
31176	1	1000101000 (1) 1010101000
31175	1	1000101000 (1) 1100101000
31303	1	1010000100 (1) 1010000110
31302	1	1010000100 (1) 1010000000
31301	1	1010000100 (1) 1010100100
31300	1	1010000100 (1) 1110000100
31165	1	1100101000 (1) 1100100000
31164	1	1100101000 (1) 1100111000
31163	1	1100101000 (1) 1100001000
31162	1	1100101000 (1) 1101101000
31264	1	0010000100 (1) 0010000110
31263	1	0010000100 (1) 0010000000
31262	1	0010000100 (1) 0010100100
31147	1	0100101000 (1) 0100100000
31146	1	0100101000 (1) 0100111000
31145	1	0100101000 (1) 0100001000
31144	1	0100101000 (1) 0101101000
31143	1	0100101000 (1) 0000101000
31573	1	1011110000 (1) 1011111000
31572	1	1011110000 (1) 1011010000
31571	1	1011110000 (1) 1010110000
31155	1	1110000100 (1) 1110000110
31154	1	1110000100 (1) 1110000000
31153	1	1110000100 (1) 1110100100
31152	1	1110000100 (1) 1100000100
31560	1	0011110000 (1) 0011111000
31559	1	0011110000 (1) 0011010000
31558	1	0011110000 (1) 0010110000
31131	1	0110000100 (1) 0110000110
31130	1	0110000100 (1) 0110000000
31129	1	0110000100 (1) 0110100100
31128	1	0110000100 (1) 0100000100
31127	1	0110000100 (1) 0010000100
31547	1	1111110000 (1) 1111111000
31546	1	1111110000 (1) 1110110000
31545	1	1111110000 (1) 1101110000
31544	1	1111110000 (1) 1011110000
31530	1	0111110000 (1) 0111111000
31529	1	0111110000 (1) 0110110000
31528	1	0111110000 (1) 0101110000
31527	1	0111110000 (1) 0011110000
31183	1	0010101000 (1) 0010100000
31182	1	0010101000 (1) 0010111000
31181	1	0010101000 (1) 0010001000
31169	1	1010101000 (1) 1010100000
31168	1	1010101000 (1) 1010111000
31167	1	1010101000 (1) 1010001000
31166	1	1010101000 (1) 1110101000
31111	1	1110101000 (1) 1110100000
31110	1	1110101000 (1) 1110111000
31109	1	1110101000 (1) 1110001000
31108	1	1110101000 (1) 1100101000
31107	1	0110101000 (1) 0110100000
31106	1	0110101000 (1) 0110111000
31105	1	0110101000 (1) 0110001000
31104	1	0110101000 (1) 0100101000
31103	1	0110101000 (1) 0010101000
31308	1	1001000100 (1) 1001000110
31307	1	1001000100 (1) 1001000000
31306	1	1001000100 (1) 1001100100
31305	1	1001000100 (1) 1011000100
31304	1	1001000100 (1) 1101000100
31268	1	0001000100 (1) 0001000110
31267	1	0001000100 (1) 0001000000
31266	1	0001000100 (1) 0001100100
31265	1	0001000100 (1) 0011000100
31244	1	1101000100 (1) 1101000110
31243	1	1101000100 (1) 1101000000
31242	1	1101000100 (1) 1101100100
31216	1	0101000100 (1) 0101000110
31215	1	0101000100 (1) 0101000000
31214	1	0101000100 (1) 0101100100
31213	1	0101000100 (1) 0001000100
31639	1	1000011000 (1) 1000011010
31638	1	1000011000 (1) 1000011100
31637	1	1000011000 (1) 1000001000
31636	1	1000011000 (1) 1001011000
31620	1	0000011000 (1) 0000011010
31619	1	0000011000 (1) 0000011100
31618	1	0000011000 (1) 0000001000
31617	1	0000011000 (1) 0001011000
31187	1	0001101000 (1) 0001100000
31186	1	0001101000 (1) 0001111000
31185	1	0001101000 (1) 0001001000
31184	1	0001101000 (1) 0011101000
31174	1	1001101000 (1) 1001100000
31173	1	1001101000 (1) 1001111000
31172	1	1001101000 (1) 1001001000
31171	1	1001101000 (1) 1011101000
31170	1	1001101000 (1) 1101101000
31336	1	1101101000 (1) 1101100000
31335	1	1101101000 (1) 1101111000
31603	1	1100011000 (1) 1100011010
31602	1	1100011000 (1) 1100011100
31601	1	1100011000 (1) 1100001000
31600	1	1100011000 (1) 1101011000
31599	1	1100011000 (1) 1000011000
31094	1	1011000100 (1) 1011000110
31093	1	1011000100 (1) 1011000000
31092	1	1011000100 (1) 1011100100
31091	1	1011000100 (1) 1010000100
31090	1	1011000100 (1) 1111000100
31083	1	0011000100 (1) 0011000110
31082	1	0011000100 (1) 0011000000
31081	1	0011000100 (1) 0011100100
31080	1	0011000100 (1) 0010000100
31327	1	0101101000 (1) 0101100000
31326	1	0101101000 (1) 0101111000
31325	1	0101101000 (1) 0001101000
31583	1	0100011000 (1) 0100011010
31582	1	0100011000 (1) 0100011100
31581	1	0100011000 (1) 0100001000
31580	1	0100011000 (1) 0101011000
31579	1	0100011000 (1) 0000011000
31025	1	1111000100 (1) 1111000110
31024	1	1111000100 (1) 1111000000
31023	1	1111000100 (1) 1111100100
31022	1	1111000100 (1) 1110000100
31021	1	1111000100 (1) 1101000100
30998	1	0111000100 (1) 0111000110
30997	1	0111000100 (1) 0111000000
30996	1	0111000100 (1) 0111100100
30995	1	0111000100 (1) 0110000100
30994	1	0111000100 (1) 0101000100
30993	1	0111000100 (1) 0011000100
31795	1	0000000010 (1) 0001000010
31790	1	1000000010 (1) 1001000010
31789	1	1000000010 (1) 1100000010
31784	1	1100000010 (1) 1101000010
31313	1	1000100100 (1) 1000100000
31312	1	1000100100 (1) 1000110100
31311	1	1000100100 (1) 1001100100
31310	1	1000100100 (1) 1010100100
31309	1	1000100100 (1) 1100100100
31564	1	1010011000 (1) 1010011010
31563	1	1010011000 (1) 1010011100
31562	1	1010011000 (1) 1010001000
31561	1	1010011000 (1) 1000011000
31778	1	0100000010 (1) 0101000010
31777	1	0100000010 (1) 0000000010
31551	1	0010011000 (1) 0010011010
31550	1	0010011000 (1) 0010011100
31549	1	0010011000 (1) 0010001000
31548	1	0010011000 (1) 0000011000
31272	1	0000100100 (1) 0000100000
31271	1	0000100100 (1) 0000110100
31270	1	0000100100 (1) 0001100100
31269	1	0000100100 (1) 0010100100
31051	1	0011101000 (1) 0011100000
31050	1	0011101000 (1) 0011111000
31049	1	0011101000 (1) 0011001000
31048	1	0011101000 (1) 0010101000
31047	1	1011101000 (1) 1011100000
31046	1	1011101000 (1) 1011111000
31045	1	1011101000 (1) 1011001000
31044	1	1011101000 (1) 1010101000
31043	1	1011101000 (1) 1111101000
31535	1	1110011000 (1) 1110011010
31534	1	1110011000 (1) 1110011100
31533	1	1110011000 (1) 1110001000
31532	1	1110011000 (1) 1100011000
31531	1	1110011000 (1) 1010011000
31248	1	1100100100 (1) 1100100000
31247	1	1100100100 (1) 1100110100
31246	1	1100100100 (1) 1101100100
31245	1	1100100100 (1) 1110100100
31237	1	1111101000 (1) 1111100000
31236	1	1111101000 (1) 1111111000
31235	1	1111101000 (1) 1110101000
31234	1	1111101000 (1) 1101101000
31518	1	0110011000 (1) 0110011010
31517	1	0110011000 (1) 0110011100
31516	1	0110011000 (1) 0110001000
31515	1	0110011000 (1) 0100011000
31514	1	0110011000 (1) 0010011000
31221	1	0100100100 (1) 0100100000
31220	1	0100100100 (1) 0100110100
31219	1	0100100100 (1) 0101100100
31218	1	0100100100 (1) 0110100100
31217	1	0100100100 (1) 0000100100
31201	1	0111101000 (1) 0111100000
31200	1	0111101000 (1) 0111111000
31199	1	0111101000 (1) 0110101000
31198	1	0111101000 (1) 0101101000
31197	1	0111101000 (1) 0011101000
31770	1	1010000010 (1) 1000000010
31769	1	1010000010 (1) 1110000010
31764	1	0010000010 (1) 0000000010
31763	1	1110000010 (1) 1100000010
31158	1	1010100100 (1) 1010100000
31157	1	1010100100 (1) 1010110100
31156	1	1010100100 (1) 1110100100
31759	1	0110000010 (1) 0100000010
31758	1	0110000010 (1) 0010000010
31149	1	0010100100 (1) 0010100000
31148	1	0010100100 (1) 0010110100
31136	1	1110100100 (1) 1110100000
31135	1	1110100100 (1) 1110110100
31512	1	1001011000 (1) 1001011010
31511	1	1001011000 (1) 1001011100
31510	1	1001011000 (1) 1001001000
31508	1	0001011000 (1) 0001011010
31507	1	0001011000 (1) 0001011100
31506	1	0001011000 (1) 0001001000
31122	1	0110100100 (1) 0110100000
31121	1	0110100100 (1) 0110110100
31120	1	0110100100 (1) 0010100100
31502	1	1101011000 (1) 1101011010
31501	1	1101011000 (1) 1101011100
31500	1	1101011000 (1) 1101001000
31499	1	1101011000 (1) 1101111000
31498	1	1101011000 (1) 1001011000
31494	1	0101011000 (1) 0101011010
31493	1	0101011000 (1) 0101011100
31492	1	0101011000 (1) 0101001000
31491	1	0101011000 (1) 0101111000
31490	1	0101011000 (1) 0001011000
31757	1	1001000010 (1) 1101000010
31756	1	1101000010 (1) 1101100010
31098	1	1001100100 (1) 1001100000
31097	1	1001100100 (1) 1001110100
31096	1	1001100100 (1) 1011100100
31095	1	1001100100 (1) 1101100100
31445	1	1011011000 (1) 1011011010
31444	1	1011011000 (1) 1011011100
31443	1	1011011000 (1) 1011001000
31442	1	1011011000 (1) 1010011000
31441	1	1011011000 (1) 1001011000
31754	1	0101000010 (1) 0101100010
31753	1	0101000010 (1) 0001000010
31086	1	0001100100 (1) 0001100000
31085	1	0001100100 (1) 0001110100
31084	1	0001100100 (1) 0011100100
31432	1	0011011000 (1) 0011011010
31431	1	0011011000 (1) 0011011100
31430	1	0011011000 (1) 0011001000
31429	1	0011011000 (1) 0010011000
31428	1	0011011000 (1) 0001011000
30868	1	0000010100 (1) 0000010110
30867	1	0000010100 (1) 0000010000
30866	1	0000010100 (1) 0000011100
30865	1	0000010100 (1) 0000000100
30864	1	0000010100 (1) 0000110100
30863	1	0000010100 (1) 0001010100
30862	1	0000010100 (1) 0010010100
30845	1	1000010100 (1) 1000010110
30844	1	1000010100 (1) 1000010000
30843	1	1000010100 (1) 1000011100
30842	1	1000010100 (1) 1000000100
30841	1	1000010100 (1) 1000110100
30840	1	1000010100 (1) 1001010100
30839	1	1000010100 (1) 1010010100
31077	1	1101100100 (1) 1101100000
31076	1	1101100100 (1) 1101110100
31075	1	1101100100 (1) 1111100100
31071	1	0101100100 (1) 0101100000
31070	1	0101100100 (1) 0101110100
31069	1	0101100100 (1) 0111100100
31068	1	0101100100 (1) 0001100100
31415	1	0111011000 (1) 0111011010
31414	1	0111011000 (1) 0111011100
31413	1	0111011000 (1) 0111001000
31412	1	0111011000 (1) 0111111000
31411	1	0111011000 (1) 0110011000
31410	1	0111011000 (1) 0101011000
31409	1	0111011000 (1) 0011011000
31396	1	1111011000 (1) 1111011010
31395	1	1111011000 (1) 1111011100
31394	1	1111011000 (1) 1111001000
31393	1	1111011000 (1) 1111111000
31392	1	1111011000 (1) 1110011000
31391	1	1111011000 (1) 1101011000
31390	1	1111011000 (1) 1011011000
30788	1	0100010100 (1) 0100010110
30787	1	0100010100 (1) 0100010000
30786	1	0100010100 (1) 0100011100
30785	1	0100010100 (1) 0100000100
30784	1	0100010100 (1) 0100110100
30783	1	0100010100 (1) 0101010100
30782	1	0100010100 (1) 0000010100
30770	1	1100010100 (1) 1100010110
30769	1	1100010100 (1) 1100010000
30768	1	1100010100 (1) 1100011100
30767	1	1100010100 (1) 1100000100
30766	1	1100010100 (1) 1100110100
30765	1	1100010100 (1) 1101010100
30764	1	1100010100 (1) 1000010100
31746	1	1011000010 (1) 1010000010
31745	1	1011000010 (1) 1001000010
31744	1	1011000010 (1) 1111000010
31374	1	1000111000 (1) 1000111100
31373	1	1000111000 (1) 1000011000
31372	1	1000111000 (1) 1001111000
31371	1	1000111000 (1) 1010111000
31736	1	0011000010 (1) 0010000010
31735	1	0011000010 (1) 0001000010
31368	1	0000111000 (1) 0000111100
31367	1	0000111000 (1) 0000011000
31366	1	0000111000 (1) 0001111000
31365	1	0000111000 (1) 0010111000
31734	1	1111000010 (1) 1111100010
31733	1	1111000010 (1) 1110000010
31732	1	1111000010 (1) 1101000010
31357	1	1100111000 (1) 1100111100
31356	1	1100111000 (1) 1100011000
31355	1	1100111000 (1) 1101111000
31354	1	1100111000 (1) 1000111000
31029	1	1011100100 (1) 1011100000
31028	1	1011100100 (1) 1011110100
31027	1	1011100100 (1) 1010100100
31026	1	1011100100 (1) 1111100100
31017	1	0011100100 (1) 0011100000
31016	1	0011100100 (1) 0011110100
31015	1	0011100100 (1) 0010100100
31353	1	0100111000 (1) 0100111100
31352	1	0100111000 (1) 0100011000
31351	1	0100111000 (1) 0101111000
31350	1	0100111000 (1) 0000111000
31723	1	0111000010 (1) 0111100010
31722	1	0111000010 (1) 0110000010
31721	1	0111000010 (1) 0101000010
31720	1	0111000010 (1) 0011000010
30850	1	0010010100 (1) 0010010110
30849	1	0010010100 (1) 0010010000
30848	1	0010010100 (1) 0010011100
30847	1	0010010100 (1) 0010000100
30846	1	0010010100 (1) 0010110100
30827	1	1010010100 (1) 1010010110
30826	1	1010010100 (1) 1010010000
30825	1	1010010100 (1) 1010011100
30824	1	1010010100 (1) 1010000100
30823	1	1010010100 (1) 1010110100
31001	1	1111100100 (1) 1111100000
31000	1	1111100100 (1) 1111110100
30999	1	1111100100 (1) 1110100100
30987	1	0111100100 (1) 0111100000
30986	1	0111100100 (1) 0111110100
30985	1	0111100100 (1) 0110100100
30984	1	0111100100 (1) 0011100100
30709	1	0110010100 (1) 0110010110
30708	1	0110010100 (1) 0110010000
30707	1	0110010100 (1) 0110011100
30706	1	0110010100 (1) 0110000100
30705	1	0110010100 (1) 0110110100
30704	1	0110010100 (1) 0100010100
30703	1	0110010100 (1) 0010010100
30697	1	1110010100 (1) 1110010110
30696	1	1110010100 (1) 1110010000
30695	1	1110010100 (1) 1110011100
30694	1	1110010100 (1) 1110000100
30693	1	1110010100 (1) 1110110100
30692	1	1110010100 (1) 1100010100
30691	1	1110010100 (1) 1010010100
30685	1	1000100010 (1) 1000100000
30684	1	1000100010 (1) 1000110010
30683	1	1000100010 (1) 1000000010
30682	1	1000100010 (1) 1001100010
30681	1	1000100010 (1) 1010100010
30680	1	1000100010 (1) 1100100010
30662	1	0000100010 (1) 0000100000
30661	1	0000100010 (1) 0000110010
30660	1	0000100010 (1) 0000000010
30659	1	0000100010 (1) 0001100010
30658	1	0000100010 (1) 0010100010
31349	1	1010111000 (1) 1010111100
31348	1	1010111000 (1) 1010011000
30666	1	1100100010 (1) 1100100000
30665	1	1100100010 (1) 1100110010
30664	1	1100100010 (1) 1100000010
30663	1	1100100010 (1) 1101100010
31345	1	0010111000 (1) 0010111100
31344	1	0010111000 (1) 0010011000
30640	1	0100100010 (1) 0100100000
30639	1	0100100010 (1) 0100110010
30638	1	0100100010 (1) 0100000010
30637	1	0100100010 (1) 0101100010
30636	1	0100100010 (1) 0000100010
30631	1	0000000001 (1) 0000000011
30630	1	0000000001 (1) 0000000101
30629	1	0000000001 (1) 0001000001
30620	1	1000000001 (1) 1000000011
30619	1	1000000001 (1) 1000000101
30618	1	1000000001 (1) 1001000001
30617	1	1000000001 (1) 1100000001
31342	1	1110111000 (1) 1110111100
31341	1	1110111000 (1) 1110011000
31340	1	1110111000 (1) 1100111000
31339	1	1110111000 (1) 1010111000
31334	1	0110111000 (1) 0110111100
31333	1	0110111000 (1) 0110011000
31332	1	0110111000 (1) 0100111000
31331	1	0110111000 (1) 0010111000
30605	1	1100000001 (1) 1100000011
30604	1	1100000001 (1) 1100000101
30603	1	1100000001 (1) 1101000001
30590	1	0100000001 (1) 0100000011
30589	1	0100000001 (1) 0100000101
30588	1	0100000001 (1) 0101000001
30587	1	0100000001 (1) 0000000001
30856	1	0001010100 (1) 0001010110
30855	1	0001010100 (1) 0001010000
30854	1	0001010100 (1) 0001011100
30853	1	0001010100 (1) 0001000100
30852	1	0001010100 (1) 0001110100
30851	1	0001010100 (1) 0011010100
30833	1	1001010100 (1) 1001010110
30832	1	1001010100 (1) 1001010000
30831	1	1001010100 (1) 1001011100
30830	1	1001010100 (1) 1001000100
30829	1	1001010100 (1) 1001110100
30828	1	1001010100 (1) 1011010100
30670	1	1010100010 (1) 1010100000
30669	1	1010100010 (1) 1010110010
30668	1	1010100010 (1) 1010000010
30667	1	1010100010 (1) 1110100010
30649	1	0010100010 (1) 0010100000
30648	1	0010100010 (1) 0010110010
30647	1	0010100010 (1) 0010000010
30776	1	0101010100 (1) 0101010110
30775	1	0101010100 (1) 0101010000
30774	1	0101010100 (1) 0101011100
30773	1	0101010100 (1) 0101000100
30772	1	0101010100 (1) 0101110100
30771	1	0101010100 (1) 0001010100
30758	1	1101010100 (1) 1101010110
30757	1	1101010100 (1) 1101010000
30756	1	1101010100 (1) 1101011100
30755	1	1101010100 (1) 1101000100
30754	1	1101010100 (1) 1101110100
30753	1	1101010100 (1) 1001010100
30553	1	1110100010 (1) 1110100000
30552	1	1110100010 (1) 1110110010
30551	1	1110100010 (1) 1110000010
30550	1	1110100010 (1) 1100100010
30535	1	1000001100 (1) 1000001110
30534	1	1000001100 (1) 1000001000
30533	1	1000001100 (1) 1000000100
30532	1	1000001100 (1) 1001001100
30531	1	1000001100 (1) 1010001100
30530	1	1000001100 (1) 1100001100
30511	1	0000001100 (1) 0000001110
30510	1	0000001100 (1) 0000001000
30509	1	0000001100 (1) 0000000100
30508	1	0000001100 (1) 0001001100
30507	1	0000001100 (1) 0010001100
30495	1	0110100010 (1) 0110100000
30494	1	0110100010 (1) 0110110010
30493	1	0110100010 (1) 0110000010
30492	1	0110100010 (1) 0100100010
30491	1	0110100010 (1) 0010100010
30486	1	1010000001 (1) 1010000011
30485	1	1010000001 (1) 1010000101
30484	1	1010000001 (1) 1000000001
30483	1	1010000001 (1) 1110000001
30473	1	0010000001 (1) 0010000011
30472	1	0010000001 (1) 0010000101
30471	1	0010000001 (1) 0000000001
31254	1	1001111000 (1) 1001111100
31253	1	1001111000 (1) 1001011000
31252	1	1001111000 (1) 1011111000
30515	1	1100001100 (1) 1100001110
30514	1	1100001100 (1) 1100001000
30513	1	1100001100 (1) 1100000100
30512	1	1100001100 (1) 1101001100
31233	1	0001111000 (1) 0001111100
31232	1	0001111000 (1) 0001011000
31231	1	0001111000 (1) 0011111000
30455	1	0100001100 (1) 0100001110
30454	1	0100001100 (1) 0100001000
30453	1	0100001100 (1) 0100000100
30452	1	0100001100 (1) 0101001100
30451	1	0100001100 (1) 0000001100
30476	1	1110000001 (1) 1110000011
30475	1	1110000001 (1) 1110000101
30474	1	1110000001 (1) 1100000001
30436	1	0110000001 (1) 0110000011
30435	1	0110000001 (1) 0110000101
30434	1	0110000001 (1) 0100000001
30433	1	0110000001 (1) 0010000001
31196	1	1101111000 (1) 1101111100
31195	1	1101111000 (1) 1001111000
31194	1	0101111000 (1) 0101111100
31193	1	0101111000 (1) 0001111000
30571	1	0011010100 (1) 0011010110
30570	1	0011010100 (1) 0011010000
30569	1	0011010100 (1) 0011011100
30568	1	0011010100 (1) 0011000100
30567	1	0011010100 (1) 0011110100
30566	1	0011010100 (1) 0010010100
30561	1	1011010100 (1) 1011010110
30560	1	1011010100 (1) 1011010000
30559	1	1011010100 (1) 1011011100
30558	1	1011010100 (1) 1011000100
30557	1	1011010100 (1) 1011110100
30556	1	1011010100 (1) 1010010100
30413	1	0111010100 (1) 0111010110
30412	1	0111010100 (1) 0111010000
30411	1	0111010100 (1) 0111011100
30410	1	0111010100 (1) 0111000100
30409	1	0111010100 (1) 0111110100
30408	1	0111010100 (1) 0110010100
30407	1	0111010100 (1) 0101010100
30406	1	0111010100 (1) 0011010100
30399	1	1111010100 (1) 1111010110
30398	1	1111010100 (1) 1111010000
30397	1	1111010100 (1) 1111011100
30396	1	1111010100 (1) 1111000100
30395	1	1111010100 (1) 1111110100
30394	1	1111010100 (1) 1110010100
30393	1	1111010100 (1) 1101010100
30392	1	1111010100 (1) 1011010100
31641	1	1000010010 (1) 1000000010
31640	1	1000010010 (1) 1001010010
30519	1	1010001100 (1) 1010001110
30518	1	1010001100 (1) 1010001000
30517	1	1010001100 (1) 1010000100
30516	1	1010001100 (1) 1110001100
30675	1	1001100010 (1) 1001100000
30674	1	1001100010 (1) 1001110010
30673	1	1001100010 (1) 1001000010
30672	1	1001100010 (1) 1011100010
30671	1	1001100010 (1) 1101100010
31622	1	0000010010 (1) 0000000010
31621	1	0000010010 (1) 0001010010
30498	1	0010001100 (1) 0010001110
30497	1	0010001100 (1) 0010001000
30496	1	0010001100 (1) 0010000100
30653	1	0001100010 (1) 0001100000
30652	1	0001100010 (1) 0001110010
30651	1	0001100010 (1) 0001000010
30650	1	0001100010 (1) 0011100010
30361	1	0110001100 (1) 0110001110
30360	1	0110001100 (1) 0110001000
30359	1	0110001100 (1) 0110000100
30358	1	0110001100 (1) 0100001100
30357	1	0110001100 (1) 0010001100
30622	1	0001000001 (1) 0001000011
30621	1	0001000001 (1) 0001000101
30895	1	1101100010 (1) 1101100000
30894	1	1101100010 (1) 1101110010
30967	1	0000110100 (1) 0000110000
30966	1	0000110100 (1) 0000111100
30965	1	0000110100 (1) 0001110100
30964	1	0000110100 (1) 0010110100
31134	1	0011111000 (1) 0011111100
31133	1	0011111000 (1) 0011011000
31132	1	0011111000 (1) 0010111000
30608	1	1001000001 (1) 1001000011
30607	1	1001000001 (1) 1001000101
30606	1	1001000001 (1) 1101000001
31606	1	1100010010 (1) 1100000010
31605	1	1100010010 (1) 1101010010
31604	1	1100010010 (1) 1000010010
31142	1	1011111000 (1) 1011111100
31141	1	1011111000 (1) 1011011000
31140	1	1011111000 (1) 1010111000
30382	1	1110001100 (1) 1110001110
30381	1	1110001100 (1) 1110001000
30380	1	1110001100 (1) 1110000100
30379	1	1110001100 (1) 1100001100
30983	1	1000110100 (1) 1000110000
30982	1	1000110100 (1) 1000111100
30981	1	1000110100 (1) 1001110100
30980	1	1000110100 (1) 1010110100
30882	1	0101100010 (1) 0101100000
30881	1	0101100010 (1) 0101110010
30880	1	0101100010 (1) 0001100010
31586	1	0100010010 (1) 0100000010
31585	1	0100010010 (1) 0101010010
31584	1	0100010010 (1) 0000010010
31119	1	1111111000 (1) 1111111100
31118	1	1111111000 (1) 1110111000
31117	1	1111111000 (1) 1101111000
31116	1	1111111000 (1) 1011111000
30954	1	1100110100 (1) 1100110000
30953	1	1100110100 (1) 1100111100
30952	1	1100110100 (1) 1101110100
30951	1	1100110100 (1) 1110110100
30950	1	1100110100 (1) 1000110100
31115	1	0111111000 (1) 0111111100
31114	1	0111111000 (1) 0110111000
31113	1	0111111000 (1) 0101111000
31112	1	0111111000 (1) 0011111000
30940	1	0100110100 (1) 0100110000
30939	1	0100110100 (1) 0100111100
30938	1	0100110100 (1) 0101110100
30937	1	0100110100 (1) 0110110100
30936	1	0100110100 (1) 0000110100
30593	1	1101000001 (1) 1101000011
30592	1	1101000001 (1) 1101000101
30591	1	1101000001 (1) 1101100001
30579	1	0101000001 (1) 0101000011
30578	1	0101000001 (1) 0101000101
30577	1	0101000001 (1) 0101100001
30576	1	0101000001 (1) 0001000001
31566	1	1010010010 (1) 1010000010
31565	1	1010010010 (1) 1000010010
30375	1	1011100010 (1) 1011100000
30374	1	1011100010 (1) 1011110010
30373	1	1011100010 (1) 1011000010
30372	1	1011100010 (1) 1010100010
30371	1	1011100010 (1) 1111100010
31553	1	0010010010 (1) 0010000010
31552	1	0010010010 (1) 0000010010
30365	1	0011100010 (1) 0011100000
30364	1	0011100010 (1) 0011110010
30363	1	0011100010 (1) 0011000010
30362	1	0011100010 (1) 0010100010
30728	1	0111100010 (1) 0111100000
30727	1	0111100010 (1) 0111110010
30726	1	0111100010 (1) 0110100010
30725	1	0111100010 (1) 0101100010
30724	1	0111100010 (1) 0011100010
31538	1	1110010010 (1) 1110000010
31537	1	1110010010 (1) 1100010010
31536	1	1110010010 (1) 1010010010
30746	1	1111100010 (1) 1111100000
30745	1	1111100010 (1) 1111110010
30744	1	1111100010 (1) 1110100010
30743	1	1111100010 (1) 1101100010
30935	1	1010110100 (1) 1010110000
30934	1	1010110100 (1) 1010111100
30524	1	1001001100 (1) 1001001110
30523	1	1001001100 (1) 1001001000
30522	1	1001001100 (1) 1001000100
30521	1	1001001100 (1) 1011001100
30520	1	1001001100 (1) 1101001100
31521	1	0110010010 (1) 0110000010
31520	1	0110010010 (1) 0100010010
31519	1	0110010010 (1) 0010010010
30933	1	0010110100 (1) 0010110000
30932	1	0010110100 (1) 0010111100
30502	1	0001001100 (1) 0001001110
30501	1	0001001100 (1) 0001001000
30500	1	0001001100 (1) 0001000100
30499	1	0001001100 (1) 0011001100
30282	1	0011000001 (1) 0011000011
30281	1	0011000001 (1) 0011000101
30280	1	0011000001 (1) 0010000001
30279	1	0011000001 (1) 0001000001
30272	1	1011000001 (1) 1011000011
30271	1	1011000001 (1) 1011000101
30270	1	1011000001 (1) 1010000001
30269	1	1011000001 (1) 1001000001
30268	1	1011000001 (1) 1111000001
30931	1	1110110100 (1) 1110110000
30930	1	1110110100 (1) 1110111100
30929	1	1110110100 (1) 1010110100
30461	1	1101001100 (1) 1101001110
30460	1	1101001100 (1) 1101001000
30459	1	1101001100 (1) 1101000100
30458	1	1101001100 (1) 1101101100
30916	1	0110110100 (1) 0110110000
30915	1	0110110100 (1) 0110111100
30914	1	0110110100 (1) 0010110100
30446	1	0101001100 (1) 0101001110
30445	1	0101001100 (1) 0101001000
30444	1	0101001100 (1) 0101000100
30443	1	0101001100 (1) 0101101100
30442	1	0101001100 (1) 0001001100
30259	1	1111000001 (1) 1111000011
30258	1	1111000001 (1) 1111000101
30257	1	1111000001 (1) 1111100001
30256	1	1111000001 (1) 1110000001
30255	1	1111000001 (1) 1101000001
30226	1	0111000001 (1) 0111000011
30225	1	0111000001 (1) 0111000101
30224	1	0111000001 (1) 0111100001
30223	1	0111000001 (1) 0110000001
30222	1	0111000001 (1) 0101000001
30221	1	0111000001 (1) 0011000001
30205	1	0000100001 (1) 0000100101
30204	1	0000100001 (1) 0000110001
30203	1	0000100001 (1) 0000000001
30202	1	0000100001 (1) 0001100001
30201	1	0000100001 (1) 0010100001
30185	1	1000100001 (1) 1000100101
30184	1	1000100001 (1) 1000110001
30183	1	1000100001 (1) 1000000001
30182	1	1000100001 (1) 1001100001
30181	1	1000100001 (1) 1010100001
30180	1	1000100001 (1) 1100100001
31513	1	1001010010 (1) 1001000010
30294	1	1011001100 (1) 1011001110
30293	1	1011001100 (1) 1011001000
30292	1	1011001100 (1) 1011000100
30291	1	1011001100 (1) 1010001100
30290	1	1011001100 (1) 1111001100
31509	1	0001010010 (1) 0001000010
30286	1	0011001100 (1) 0011001110
30285	1	0011001100 (1) 0011001000
30284	1	0011001100 (1) 0011000100
30283	1	0011001100 (1) 0010001100
30161	1	1100100001 (1) 1100100101
30160	1	1100100001 (1) 1100110001
30159	1	1100100001 (1) 1100000001
30158	1	1100100001 (1) 1101100001
30136	1	0100100001 (1) 0100100101
30135	1	0100100001 (1) 0100110001
30134	1	0100100001 (1) 0100000001
30133	1	0100100001 (1) 0101100001
30132	1	0100100001 (1) 0000100001
31505	1	1101010010 (1) 1101000010
31504	1	1101010010 (1) 1101110010
31503	1	1101010010 (1) 1001010010
30893	1	1001110100 (1) 1001110000
30892	1	1001110100 (1) 1001111100
30891	1	1001110100 (1) 1011110100
30153	1	1111001100 (1) 1111001110
30152	1	1111001100 (1) 1111001000
30151	1	1111001100 (1) 1111000100
30150	1	1111001100 (1) 1111101100
30149	1	1111001100 (1) 1110001100
30148	1	1111001100 (1) 1101001100
31497	1	0101010010 (1) 0101000010
31496	1	0101010010 (1) 0101110010
31495	1	0101010010 (1) 0001010010
30879	1	0001110100 (1) 0001110000
30878	1	0001110100 (1) 0001111100
30877	1	0001110100 (1) 0011110100
30113	1	0111001100 (1) 0111001110
30112	1	0111001100 (1) 0111001000
30111	1	0111001100 (1) 0111000100
30110	1	0111001100 (1) 0111101100
30109	1	0111001100 (1) 0110001100
30108	1	0111001100 (1) 0101001100
30107	1	0111001100 (1) 0011001100
30822	1	1101110100 (1) 1101110000
30821	1	1101110100 (1) 1101111100
30820	1	1101110100 (1) 1111110100
30819	1	1101110100 (1) 1001110100
31485	1	1000001010 (1) 1000000010
31484	1	1000001010 (1) 1001001010
31483	1	1000001010 (1) 1100001010
31473	1	0000001010 (1) 0000000010
31472	1	0000001010 (1) 0001001010
30818	1	0101110100 (1) 0101110000
30817	1	0101110100 (1) 0101111100
30816	1	0101110100 (1) 0111110100
30815	1	0101110100 (1) 0001110100
31469	1	1100001010 (1) 1100000010
31468	1	1100001010 (1) 1101001010
31460	1	0100001010 (1) 0100000010
31459	1	0100001010 (1) 0101001010
31458	1	0100001010 (1) 0000001010
30095	1	0000101100 (1) 0000101000
30094	1	0000101100 (1) 0000100100
30093	1	0000101100 (1) 0000111100
30092	1	0000101100 (1) 0000001100
30091	1	0000101100 (1) 0001101100
30090	1	0000101100 (1) 0010101100
30080	1	1000101100 (1) 1000101000
30079	1	1000101100 (1) 1000100100
30078	1	1000101100 (1) 1000111100
30077	1	1000101100 (1) 1000001100
30076	1	1000101100 (1) 1001101100
30075	1	1000101100 (1) 1010101100
30074	1	1000101100 (1) 1100101100
30188	1	0010100001 (1) 0010100101
30187	1	0010100001 (1) 0010110001
30186	1	0010100001 (1) 0010000001
30165	1	1010100001 (1) 1010100101
30164	1	1010100001 (1) 1010110001
30163	1	1010100001 (1) 1010000001
30162	1	1010100001 (1) 1110100001
31448	1	1011010010 (1) 1011000010
31447	1	1011010010 (1) 1010010010
31446	1	1011010010 (1) 1001010010
31435	1	0011010010 (1) 0011000010
31434	1	0011010010 (1) 0010010010
31433	1	0011010010 (1) 0001010010
30062	1	1100101100 (1) 1100101000
30061	1	1100101100 (1) 1100100100
30060	1	1100101100 (1) 1100111100
30059	1	1100101100 (1) 1100001100
30058	1	1100101100 (1) 1101101100
30057	1	1100101100 (1) 1110101100
30039	1	0100101100 (1) 0100101000
30038	1	0100101100 (1) 0100100100
30037	1	0100101100 (1) 0100111100
30036	1	0100101100 (1) 0100001100
30035	1	0100101100 (1) 0101101100
30034	1	0100101100 (1) 0110101100
30033	1	0100101100 (1) 0000101100
30047	1	1110100001 (1) 1110100101
30046	1	1110100001 (1) 1110110001
30045	1	1110100001 (1) 1110000001
30044	1	1110100001 (1) 1100100001
30021	1	0110100001 (1) 0110100101
30020	1	0110100001 (1) 0110110001
30019	1	0110100001 (1) 0110000001
30018	1	0110100001 (1) 0100100001
30017	1	0110100001 (1) 0010100001
30738	1	1011110100 (1) 1011110000
30737	1	1011110100 (1) 1011111100
30736	1	1011110100 (1) 1010110100
30735	1	0011110100 (1) 0011110000
30734	1	0011110100 (1) 0011111100
30733	1	0011110100 (1) 0010110100
31420	1	0111010010 (1) 0111000010
31419	1	0111010010 (1) 0111110010
31418	1	0111010010 (1) 0110010010
31417	1	0111010010 (1) 0101010010
31416	1	0111010010 (1) 0011010010
31401	1	1111010010 (1) 1111000010
31400	1	1111010010 (1) 1111110010
31399	1	1111010010 (1) 1110010010
31398	1	1111010010 (1) 1101010010
31397	1	1111010010 (1) 1011010010
30717	1	1111110100 (1) 1111110000
30716	1	1111110100 (1) 1111111100
30715	1	1111110100 (1) 1110110100
30714	1	1111110100 (1) 1011110100
31385	1	1010001010 (1) 1010000010
31384	1	1010001010 (1) 1000001010
31383	1	1010001010 (1) 1110001010
31376	1	0010001010 (1) 0010000010
31375	1	0010001010 (1) 0000001010
30713	1	0111110100 (1) 0111110000
30712	1	0111110100 (1) 0111111100
30711	1	0111110100 (1) 0110110100
30710	1	0111110100 (1) 0011110100
31370	1	1110001010 (1) 1110000010
31369	1	1110001010 (1) 1100001010
30679	1	1000110010 (1) 1000110000
30678	1	1000110010 (1) 1000010010
30677	1	1000110010 (1) 1001110010
30676	1	1000110010 (1) 1010110010
30657	1	0000110010 (1) 0000110000
30656	1	0000110010 (1) 0000010010
30655	1	0000110010 (1) 0001110010
30654	1	0000110010 (1) 0010110010
31360	1	0110001010 (1) 0110000010
31359	1	0110001010 (1) 0100001010
31358	1	0110001010 (1) 0010001010
30084	1	0010101100 (1) 0010101000
30083	1	0010101100 (1) 0010100100
30082	1	0010101100 (1) 0010111100
30081	1	0010101100 (1) 0010001100
30067	1	1010101100 (1) 1010101000
30066	1	1010101100 (1) 1010100100
30065	1	1010101100 (1) 1010111100
30064	1	1010101100 (1) 1010001100
30063	1	1010101100 (1) 1110101100
30645	1	1100110010 (1) 1100110000
30644	1	1100110010 (1) 1100010010
30643	1	1100110010 (1) 1101110010
30642	1	1100110010 (1) 1000110010
30043	1	1110101100 (1) 1110101000
30042	1	1110101100 (1) 1110100100
30041	1	1110101100 (1) 1110111100
30040	1	1110101100 (1) 1110001100
30635	1	0100110010 (1) 0100110000
30634	1	0100110010 (1) 0100010010
30633	1	0100110010 (1) 0101110010
30632	1	0100110010 (1) 0000110010
30032	1	0110101100 (1) 0110101000
30031	1	0110101100 (1) 0110100100
30030	1	0110101100 (1) 0110111100
30029	1	0110101100 (1) 0110001100
30028	1	0110101100 (1) 0010101100
30009	1	1000010001 (1) 1000010011
30008	1	1000010001 (1) 1000010101
30007	1	1000010001 (1) 1000011001
30006	1	1000010001 (1) 1000000001
30005	1	1000010001 (1) 1001010001
29987	1	0000010001 (1) 0000010011
29986	1	0000010001 (1) 0000010101
29985	1	0000010001 (1) 0000011001
29984	1	0000010001 (1) 0000000001
29983	1	0000010001 (1) 0001010001
30192	1	0001100001 (1) 0001100101
30191	1	0001100001 (1) 0001110001
30190	1	0001100001 (1) 0001000001
30189	1	0001100001 (1) 0011100001
30170	1	1001100001 (1) 1001100101
30169	1	1001100001 (1) 1001110001
30168	1	1001100001 (1) 1001000001
30167	1	1001100001 (1) 1011100001
30166	1	1001100001 (1) 1101100001
30323	1	1101100001 (1) 1101100101
30322	1	1101100001 (1) 1101110001
29938	1	1100010001 (1) 1100010011
29937	1	1100010001 (1) 1100010101
29936	1	1100010001 (1) 1100011001
29935	1	1100010001 (1) 1100000001
29934	1	1100010001 (1) 1101010001
29933	1	1100010001 (1) 1000010001
30315	1	0101100001 (1) 0101100101
30314	1	0101100001 (1) 0101110001
30313	1	0101100001 (1) 0001100001
29905	1	0100010001 (1) 0100010011
29904	1	0100010001 (1) 0100010101
29903	1	0100010001 (1) 0100011001
29902	1	0100010001 (1) 0100000001
29901	1	0100010001 (1) 0101010001
29900	1	0100010001 (1) 0000010001
30555	1	1010110010 (1) 1010110000
30554	1	1010110010 (1) 1010010010
31347	1	1001001010 (1) 1001000010
31346	1	1001001010 (1) 1101001010
30549	1	0010110010 (1) 0010110000
30548	1	0010110010 (1) 0010010010
31343	1	0001001010 (1) 0001000010
31063	1	1000011100 (1) 1000011110
31062	1	1000011100 (1) 1000001100
31061	1	1000011100 (1) 1001011100
31060	1	1000011100 (1) 1010011100
30539	1	1110110010 (1) 1110110000
30538	1	1110110010 (1) 1110010010
30537	1	1110110010 (1) 1100110010
30536	1	1110110010 (1) 1010110010
31338	1	1101001010 (1) 1101000010
31337	1	1101001010 (1) 1101101010
30073	1	1001101100 (1) 1001101000
30072	1	1001101100 (1) 1001100100
30071	1	1001101100 (1) 1001111100
30070	1	1001101100 (1) 1001001100
30069	1	1001101100 (1) 1011101100
30068	1	1001101100 (1) 1101101100
29865	1	1010010001 (1) 1010010011
29864	1	1010010001 (1) 1010010101
29863	1	1010010001 (1) 1010011001
29862	1	1010010001 (1) 1010000001
29861	1	1010010001 (1) 1000010001
31055	1	0000011100 (1) 0000011110
31054	1	0000011100 (1) 0000001100
31053	1	0000011100 (1) 0001011100
31052	1	0000011100 (1) 0010011100
31330	1	0101001010 (1) 0101000010
31329	1	0101001010 (1) 0101101010
31328	1	0101001010 (1) 0001001010
29948	1	1011100001 (1) 1011100101
29947	1	1011100001 (1) 1011110001
29946	1	1011100001 (1) 1011000001
29945	1	1011100001 (1) 1010100001
29944	1	1011100001 (1) 1111100001
30089	1	0001101100 (1) 0001101000
30088	1	0001101100 (1) 0001100100
30087	1	0001101100 (1) 0001111100
30086	1	0001101100 (1) 0001001100
30085	1	0001101100 (1) 0011101100
29829	1	0010010001 (1) 0010010011
29828	1	0010010001 (1) 0010010101
29827	1	0010010001 (1) 0010011001
29826	1	0010010001 (1) 0010000001
29825	1	0010010001 (1) 0000010001
29959	1	0011100001 (1) 0011100101
29958	1	0011100001 (1) 0011110001
29957	1	0011100001 (1) 0011000001
29956	1	0011100001 (1) 0010100001
30490	1	0110110010 (1) 0110110000
30489	1	0110110010 (1) 0110010010
30488	1	0110110010 (1) 0100110010
30487	1	0110110010 (1) 0010110010
31037	1	1100011100 (1) 1100011110
31036	1	1100011100 (1) 1100001100
31035	1	1100011100 (1) 1101011100
31034	1	1100011100 (1) 1000011100
30251	1	1101101100 (1) 1101101000
30250	1	1101101100 (1) 1101100100
30249	1	1101101100 (1) 1101111100
30248	1	1101101100 (1) 1111101100
31009	1	0100011100 (1) 0100011110
31008	1	0100011100 (1) 0100001100
31007	1	0100011100 (1) 0101011100
31006	1	0100011100 (1) 0000011100
30243	1	0101101100 (1) 0101101000
30242	1	0101101100 (1) 0101100100
30241	1	0101101100 (1) 0101111100
30240	1	0101101100 (1) 0111101100
30239	1	0101101100 (1) 0001101100
30230	1	1111100001 (1) 1111100101
30229	1	1111100001 (1) 1111110001
30228	1	1111100001 (1) 1110100001
30227	1	1111100001 (1) 1101100001
29792	1	1110010001 (1) 1110010011
29791	1	1110010001 (1) 1110010101
29790	1	1110010001 (1) 1110011001
29789	1	1110010001 (1) 1110000001
29788	1	1110010001 (1) 1100010001
29787	1	1110010001 (1) 1010010001
30210	1	0111100001 (1) 0111100101
30209	1	0111100001 (1) 0111110001
30208	1	0111100001 (1) 0110100001
30207	1	0111100001 (1) 0101100001
30206	1	0111100001 (1) 0011100001
29763	1	0110010001 (1) 0110010011
29762	1	0110010001 (1) 0110010101
29761	1	0110010001 (1) 0110011001
29760	1	0110010001 (1) 0110000001
29759	1	0110010001 (1) 0100010001
29758	1	0110010001 (1) 0010010001
31318	1	1000000110 (1) 1000000010
31317	1	1000000110 (1) 1000100110
31316	1	1000000110 (1) 1001000110
31315	1	1000000110 (1) 1010000110
31314	1	1000000110 (1) 1100000110
31290	1	1011001010 (1) 1011000010
31289	1	1011001010 (1) 1010001010
31288	1	1011001010 (1) 1001001010
31287	1	1011001010 (1) 1111001010
31276	1	0000000110 (1) 0000000010
31275	1	0000000110 (1) 0000100110
31274	1	0000000110 (1) 0001000110
31273	1	0000000110 (1) 0010000110
31257	1	0011001010 (1) 0011000010
31256	1	0011001010 (1) 0010001010
31255	1	0011001010 (1) 0001001010
29871	1	1011101100 (1) 1011101000
29870	1	1011101100 (1) 1011100100
29869	1	1011101100 (1) 1011111100
29868	1	1011101100 (1) 1011001100
29867	1	1011101100 (1) 1010101100
29866	1	1011101100 (1) 1111101100
30969	1	0010011100 (1) 0010011110
30968	1	0010011100 (1) 0010001100
30975	1	1010011100 (1) 1010011110
30974	1	1010011100 (1) 1010001100
31206	1	0111001010 (1) 0111000010
31205	1	0111001010 (1) 0111101010
31204	1	0111001010 (1) 0110001010
31203	1	0111001010 (1) 0101001010
31202	1	0111001010 (1) 0011001010
30378	1	1001110010 (1) 1001110000
30377	1	1001110010 (1) 1001010010
30376	1	1001110010 (1) 1011110010
31251	1	1100000110 (1) 1100000010
31250	1	1100000110 (1) 1100100110
31249	1	1100000110 (1) 1101000110
31241	1	1111001010 (1) 1111000010
31240	1	1111001010 (1) 1111101010
31239	1	1111001010 (1) 1110001010
31238	1	1111001010 (1) 1101001010
30368	1	0001110010 (1) 0001110000
30367	1	0001110010 (1) 0001010010
30366	1	0001110010 (1) 0011110010
31225	1	0100000110 (1) 0100000010
31224	1	0100000110 (1) 0100100110
31223	1	0100000110 (1) 0101000110
31222	1	0100000110 (1) 0000000110
29834	1	0011101100 (1) 0011101000
29833	1	0011101100 (1) 0011100100
29832	1	0011101100 (1) 0011111100
29831	1	0011101100 (1) 0011001100
29830	1	0011101100 (1) 0010101100
30958	1	1110011100 (1) 1110011110
30957	1	1110011100 (1) 1110001100
30956	1	1110011100 (1) 1100011100
30955	1	1110011100 (1) 1010011100
30348	1	1101110010 (1) 1101110000
30347	1	1101110010 (1) 1001110010
30117	1	1111101100 (1) 1111101000
30116	1	1111101100 (1) 1111100100
30115	1	1111101100 (1) 1111111100
30114	1	1111101100 (1) 1110101100
30944	1	0110011100 (1) 0110011110
30943	1	0110011100 (1) 0110001100
30942	1	0110011100 (1) 0100011100
30941	1	0110011100 (1) 0010011100
30333	1	0101110010 (1) 0101110000
30332	1	0101110010 (1) 0001110010
30100	1	0111101100 (1) 0111101000
30099	1	0111101100 (1) 0111100100
30098	1	0111101100 (1) 0111111100
30097	1	0111101100 (1) 0110101100
30096	1	0111101100 (1) 0011101100
29991	1	1001010001 (1) 1001010011
29990	1	1001010001 (1) 1001010101
29989	1	1001010001 (1) 1001011001
29988	1	1001010001 (1) 1001000001
29969	1	0001010001 (1) 0001010011
29968	1	0001010001 (1) 0001010101
29967	1	0001010001 (1) 0001011001
29966	1	0001010001 (1) 0001000001
29677	1	0000101010 (1) 0000101000
29676	1	0000101010 (1) 0000100010
29675	1	0000101010 (1) 0000111010
29674	1	0000101010 (1) 0000001010
29673	1	0000101010 (1) 0001101010
29672	1	0000101010 (1) 0010101010
29656	1	1000101010 (1) 1000101000
29655	1	1000101010 (1) 1000100010
29654	1	1000101010 (1) 1000111010
29653	1	1000101010 (1) 1000001010
29652	1	1000101010 (1) 1001101010
29651	1	1000101010 (1) 1010101010
29650	1	1000101010 (1) 1100101010
29917	1	1101010001 (1) 1101010011
29916	1	1101010001 (1) 1101010101
29915	1	1101010001 (1) 1101011001
29914	1	1101010001 (1) 1101000001
29913	1	1101010001 (1) 1101110001
29912	1	1101010001 (1) 1001010001
29884	1	0101010001 (1) 0101010011
29883	1	0101010001 (1) 0101010101
29882	1	0101010001 (1) 0101011001
29881	1	0101010001 (1) 0101000001
29880	1	0101010001 (1) 0101110001
29879	1	0101010001 (1) 0001010001
31161	1	1010000110 (1) 1010000010
31160	1	1010000110 (1) 1010100110
31159	1	1010000110 (1) 1110000110
29632	1	1100101010 (1) 1100101000
29631	1	1100101010 (1) 1100100010
29630	1	1100101010 (1) 1100111010
29629	1	1100101010 (1) 1100001010
29628	1	1100101010 (1) 1101101010
31151	1	0010000110 (1) 0010000010
31150	1	0010000110 (1) 0010100110
29586	1	0100101010 (1) 0100101000
29585	1	0100101010 (1) 0100100010
29584	1	0100101010 (1) 0100111010
29583	1	0100101010 (1) 0100001010
29582	1	0100101010 (1) 0101101010
29581	1	0100101010 (1) 0000101010
29574	1	1000001001 (1) 1000001011
29573	1	1000001001 (1) 1000001101
29572	1	1000001001 (1) 1000000001
29571	1	1000001001 (1) 1001001001
29570	1	1000001001 (1) 1100001001
29552	1	0000001001 (1) 0000001011
29551	1	0000001001 (1) 0000001101
29550	1	0000001001 (1) 0000000001
29549	1	0000001001 (1) 0001001001
31139	1	1110000110 (1) 1110000010
31138	1	1110000110 (1) 1110100110
31137	1	1110000110 (1) 1100000110
30312	1	1011110010 (1) 1011110000
30311	1	1011110010 (1) 1011010010
30310	1	1011110010 (1) 1010110010
30309	1	0011110010 (1) 0011110000
30308	1	0011110010 (1) 0011010010
30307	1	0011110010 (1) 0010110010
31126	1	0110000110 (1) 0110000010
31125	1	0110000110 (1) 0110100110
31124	1	0110000110 (1) 0100000110
31123	1	0110000110 (1) 0010000110
29556	1	1100001001 (1) 1100001011
29555	1	1100001001 (1) 1100001101
29554	1	1100001001 (1) 1100000001
29553	1	1100001001 (1) 1101001001
29521	1	0100001001 (1) 0100001011
29520	1	0100001001 (1) 0100001101
29519	1	0100001001 (1) 0100000001
29518	1	0100001001 (1) 0101001001
29517	1	0100001001 (1) 0000001001
30925	1	1001011100 (1) 1001011110
30924	1	1001011100 (1) 1001001100
30923	1	1001011100 (1) 1011011100
30302	1	1111110010 (1) 1111110000
30301	1	1111110010 (1) 1110110010
30300	1	1111110010 (1) 1101110010
30299	1	1111110010 (1) 1011110010
30919	1	0001011100 (1) 0001011110
30918	1	0001011100 (1) 0001001100
30917	1	0001011100 (1) 0011011100
30306	1	0111110010 (1) 0111110000
30305	1	0111110010 (1) 0110110010
30304	1	0111110010 (1) 0101110010
30303	1	0111110010 (1) 0011110010
29497	1	1011010001 (1) 1011010011
29496	1	1011010001 (1) 1011010101
29495	1	1011010001 (1) 1011011001
29494	1	1011010001 (1) 1011000001
29493	1	1011010001 (1) 1010010001
29492	1	1011010001 (1) 1001010001
29477	1	0011010001 (1) 0011010011
29476	1	0011010001 (1) 0011010101
29475	1	0011010001 (1) 0011011001
29474	1	0011010001 (1) 0011000001
29473	1	0011010001 (1) 0010010001
29472	1	0011010001 (1) 0001010001
30908	1	1101011100 (1) 1101011110
30907	1	1101011100 (1) 1101001100
30906	1	1101011100 (1) 1101111100
30905	1	1101011100 (1) 1001011100
29660	1	0010101010 (1) 0010101000
29659	1	0010101010 (1) 0010100010
29658	1	0010101010 (1) 0010111010
29657	1	0010101010 (1) 0010001010
30899	1	0101011100 (1) 0101011110
30898	1	0101011100 (1) 0101001100
30897	1	0101011100 (1) 0101111100
30896	1	0101011100 (1) 0001011100
29637	1	1010101010 (1) 1010101000
29636	1	1010101010 (1) 1010100010
29635	1	1010101010 (1) 1010111010
29634	1	1010101010 (1) 1010001010
29633	1	1010101010 (1) 1110101010
29436	1	0111010001 (1) 0111010011
29435	1	0111010001 (1) 0111010101
29434	1	0111010001 (1) 0111011001
29433	1	0111010001 (1) 0111000001
29432	1	0111010001 (1) 0111110001
29431	1	0111010001 (1) 0110010001
29430	1	0111010001 (1) 0101010001
29429	1	0111010001 (1) 0011010001
29408	1	1111010001 (1) 1111010011
29407	1	1111010001 (1) 1111010101
29406	1	1111010001 (1) 1111011001
29405	1	1111010001 (1) 1111000001
29404	1	1111010001 (1) 1111110001
29403	1	1111010001 (1) 1110010001
29402	1	1111010001 (1) 1101010001
29401	1	1111010001 (1) 1011010001
29441	1	1110101010 (1) 1110101000
29440	1	1110101010 (1) 1110100010
29439	1	1110101010 (1) 1110111010
29438	1	1110101010 (1) 1110001010
29437	1	1110101010 (1) 1100101010
29374	1	0110101010 (1) 0110101000
29373	1	0110101010 (1) 0110100010
29372	1	0110101010 (1) 0110111010
29371	1	0110101010 (1) 0110001010
29370	1	0110101010 (1) 0100101010
29369	1	0110101010 (1) 0010101010
29362	1	1010001001 (1) 1010001011
29361	1	1010001001 (1) 1010001101
29360	1	1010001001 (1) 1010000001
29359	1	1010001001 (1) 1000001001
29358	1	1010001001 (1) 1110001001
29346	1	0010001001 (1) 0010001011
29345	1	0010001001 (1) 0010001101
29344	1	0010001001 (1) 0010000001
29343	1	0010001001 (1) 0000001001
31102	1	1001000110 (1) 1001000010
31101	1	1001000110 (1) 1001100110
31100	1	1001000110 (1) 1011000110
31099	1	1001000110 (1) 1101000110
31089	1	0001000110 (1) 0001000010
31088	1	0001000110 (1) 0001100110
31087	1	0001000110 (1) 0011000110
29350	1	1110001001 (1) 1110001011
29349	1	1110001001 (1) 1110001101
29348	1	1110001001 (1) 1110000001
29347	1	1110001001 (1) 1100001001
30175	1	1000110001 (1) 1000110101
30174	1	1000110001 (1) 1000111001
30173	1	1000110001 (1) 1000010001
30172	1	1000110001 (1) 1001110001
30171	1	1000110001 (1) 1010110001
29315	1	0110001001 (1) 0110001011
29314	1	0110001001 (1) 0110001101
29313	1	0110001001 (1) 0110000001
29312	1	0110001001 (1) 0100001001
29311	1	0110001001 (1) 0010001001
30197	1	0000110001 (1) 0000110101
30196	1	0000110001 (1) 0000111001
30195	1	0000110001 (1) 0000010001
30194	1	0000110001 (1) 0001110001
30193	1	0000110001 (1) 0010110001
30885	1	1011011100 (1) 1011011110
30884	1	1011011100 (1) 1011001100
30883	1	1011011100 (1) 1010011100
31079	1	1101000110 (1) 1101000010
31078	1	1101000110 (1) 1101100110
30871	1	0011011100 (1) 0011011110
30870	1	0011011100 (1) 0011001100
30869	1	0011011100 (1) 0010011100
31074	1	0101000110 (1) 0101000010
31073	1	0101000110 (1) 0101100110
31072	1	0101000110 (1) 0001000110
30141	1	1100110001 (1) 1100110101
30140	1	1100110001 (1) 1100111001
30139	1	1100110001 (1) 1100010001
30138	1	1100110001 (1) 1101110001
30137	1	1100110001 (1) 1000110001
30127	1	0100110001 (1) 0100110101
30126	1	0100110001 (1) 0100111001
30125	1	0100110001 (1) 0100010001
30124	1	0100110001 (1) 0101110001
30123	1	0100110001 (1) 0000110001
30807	1	0111011100 (1) 0111011110
30806	1	0111011100 (1) 0111001100
30805	1	0111011100 (1) 0111111100
30804	1	0111011100 (1) 0110011100
30803	1	0111011100 (1) 0101011100
30802	1	0111011100 (1) 0011011100
30794	1	1111011100 (1) 1111011110
30793	1	1111011100 (1) 1111001100
30792	1	1111011100 (1) 1111111100
30791	1	1111011100 (1) 1110011100
30790	1	1111011100 (1) 1101011100
30789	1	1111011100 (1) 1011011100
31067	1	1000011010 (1) 1000011110
31066	1	1000011010 (1) 1000010010
31065	1	1000011010 (1) 1000001010
31064	1	1000011010 (1) 1001011010
31059	1	0000011010 (1) 0000011110
31058	1	0000011010 (1) 0000010010
31057	1	0000011010 (1) 0000001010
31056	1	0000011010 (1) 0001011010
29665	1	0001101010 (1) 0001101000
29664	1	0001101010 (1) 0001100010
29663	1	0001101010 (1) 0001111010
29662	1	0001101010 (1) 0001001010
29661	1	0001101010 (1) 0011101010
29643	1	1001101010 (1) 1001101000
29642	1	1001101010 (1) 1001100010
29641	1	1001101010 (1) 1001111010
29640	1	1001101010 (1) 1001001010
29639	1	1001101010 (1) 1011101010
29638	1	1001101010 (1) 1101101010
29874	1	1101101010 (1) 1101101000
29873	1	1101101010 (1) 1101100010
29872	1	1101101010 (1) 1101111010
31042	1	1100011010 (1) 1100011110
31041	1	1100011010 (1) 1100010010
31040	1	1100011010 (1) 1100001010
31039	1	1100011010 (1) 1101011010
31038	1	1100011010 (1) 1000011010
30752	1	1000111100 (1) 1000011100
30751	1	1000111100 (1) 1001111100
30750	1	1000111100 (1) 1010111100
30050	1	1010110001 (1) 1010110101
30049	1	1010110001 (1) 1010111001
30048	1	1010110001 (1) 1010010001
31033	1	1011000110 (1) 1011000010
31032	1	1011000110 (1) 1011100110
31031	1	1011000110 (1) 1010000110
31030	1	1011000110 (1) 1111000110
30055	1	0010110001 (1) 0010110101
30054	1	0010110001 (1) 0010111001
30053	1	0010110001 (1) 0010010001
29560	1	1001001001 (1) 1001001011
29559	1	1001001001 (1) 1001001101
29558	1	1001001001 (1) 1001000001
29557	1	1001001001 (1) 1101001001
31020	1	0011000110 (1) 0011000010
31019	1	0011000110 (1) 0011100110
31018	1	0011000110 (1) 0010000110
29541	1	0001001001 (1) 0001001011
29540	1	0001001001 (1) 0001001101
29539	1	0001001001 (1) 0001000001
30749	1	0000111100 (1) 0000011100
30748	1	0000111100 (1) 0001111100
30747	1	0000111100 (1) 0010111100
29845	1	0101101010 (1) 0101101000
29844	1	0101101010 (1) 0101100010
29843	1	0101101010 (1) 0101111010
29842	1	0101101010 (1) 0001101010
31014	1	0100011010 (1) 0100011110
31013	1	0100011010 (1) 0100010010
31012	1	0100011010 (1) 0100001010
31011	1	0100011010 (1) 0101011010
31010	1	0100011010 (1) 0000011010
30742	1	1100111100 (1) 1100011100
30741	1	1100111100 (1) 1101111100
30740	1	1100111100 (1) 1110111100
30739	1	1100111100 (1) 1000111100
31005	1	1111000110 (1) 1111000010
31004	1	1111000110 (1) 1111100110
31003	1	1111000110 (1) 1110000110
31002	1	1111000110 (1) 1101000110
30732	1	0100111100 (1) 0100011100
30731	1	0100111100 (1) 0101111100
30730	1	0100111100 (1) 0110111100
30729	1	0100111100 (1) 0000111100
30992	1	0111000110 (1) 0111000010
30991	1	0111000110 (1) 0111100110
30990	1	0111000110 (1) 0110000110
30989	1	0111000110 (1) 0101000110
30988	1	0111000110 (1) 0011000110
29525	1	1101001001 (1) 1101001011
29524	1	1101001001 (1) 1101001101
29523	1	1101001001 (1) 1101000001
29522	1	1101001001 (1) 1101101001
30026	1	1110110001 (1) 1110110101
30025	1	1110110001 (1) 1110111001
30024	1	1110110001 (1) 1110010001
30023	1	1110110001 (1) 1100110001
30022	1	1110110001 (1) 1010110001
29508	1	0101001001 (1) 0101001011
29507	1	0101001001 (1) 0101001101
29506	1	0101001001 (1) 0101000001
29505	1	0101001001 (1) 0101101001
29504	1	0101001001 (1) 0001001001
30014	1	0110110001 (1) 0110110101
30013	1	0110110001 (1) 0110111001
30012	1	0110110001 (1) 0110010001
30011	1	0110110001 (1) 0100110001
30010	1	0110110001 (1) 0010110001
29742	1	1000100110 (1) 1000100100
29741	1	1000100110 (1) 1000100010
29740	1	1000100110 (1) 1000110110
29739	1	1000100110 (1) 1001100110
29738	1	1000100110 (1) 1010100110
29737	1	1000100110 (1) 1100100110
30979	1	1010011010 (1) 1010011110
30978	1	1010011010 (1) 1010010010
30977	1	1010011010 (1) 1010001010
30976	1	1010011010 (1) 1000011010
30973	1	0010011010 (1) 0010011110
30972	1	0010011010 (1) 0010010010
30971	1	0010011010 (1) 0010001010
30970	1	0010011010 (1) 0000011010
29736	1	0000100110 (1) 0000100100
29735	1	0000100110 (1) 0000100010
29734	1	0000100110 (1) 0000110110
29733	1	0000100110 (1) 0001100110
29732	1	0000100110 (1) 0010100110
29247	1	0011101010 (1) 0011101000
29246	1	0011101010 (1) 0011100010
29245	1	0011101010 (1) 0011111010
29244	1	0011101010 (1) 0011001010
29243	1	0011101010 (1) 0010101010
29237	1	1011101010 (1) 1011101000
29236	1	1011101010 (1) 1011100010
29235	1	1011101010 (1) 1011111010
29234	1	1011101010 (1) 1011001010
29233	1	1011101010 (1) 1010101010
29232	1	1011101010 (1) 1111101010
30646	1	1010111100 (1) 1010011100
30963	1	1110011010 (1) 1110011110
30962	1	1110011010 (1) 1110010010
30961	1	1110011010 (1) 1110001010
30960	1	1110011010 (1) 1100011010
30959	1	1110011010 (1) 1010011010
29721	1	1100100110 (1) 1100100100
29720	1	1100100110 (1) 1100100010
29719	1	1100100110 (1) 1100110110
29718	1	1100100110 (1) 1101100110
29717	1	1100100110 (1) 1110100110
29716	1	1111101010 (1) 1111101000
29715	1	1111101010 (1) 1111100010
29714	1	1111101010 (1) 1111111010
29713	1	1111101010 (1) 1110101010
29712	1	1111101010 (1) 1101101010
30613	1	1000000101 (1) 1000000111
30612	1	1000000101 (1) 1000100101
30611	1	1000000101 (1) 1001000101
30610	1	1000000101 (1) 1010000101
30609	1	1000000101 (1) 1100000101
30641	1	0010111100 (1) 0010011100
29727	1	0111101010 (1) 0111101000
29726	1	0111101010 (1) 0111100010
29725	1	0111101010 (1) 0111111010
29724	1	0111101010 (1) 0110101010
29723	1	0111101010 (1) 0101101010
29722	1	0111101010 (1) 0011101010
30949	1	0110011010 (1) 0110011110
30948	1	0110011010 (1) 0110010010
30947	1	0110011010 (1) 0110001010
30946	1	0110011010 (1) 0100011010
30945	1	0110011010 (1) 0010011010
29115	1	1011001001 (1) 1011001011
29114	1	1011001001 (1) 1011001101
29113	1	1011001001 (1) 1011000001
29112	1	1011001001 (1) 1010001001
29111	1	1011001001 (1) 1001001001
29110	1	1011001001 (1) 1111001001
30626	1	0000000101 (1) 0000000111
30625	1	0000000101 (1) 0000100101
30624	1	0000000101 (1) 0001000101
30623	1	0000000101 (1) 0010000101
29711	1	0100100110 (1) 0100100100
29710	1	0100100110 (1) 0100100010
29709	1	0100100110 (1) 0100110110
29708	1	0100100110 (1) 0101100110
29707	1	0100100110 (1) 0110100110
29706	1	0100100110 (1) 0000100110
29086	1	0011001001 (1) 0011001011
29085	1	0011001001 (1) 0011001101
29084	1	0011001001 (1) 0011000001
29083	1	0011001001 (1) 0010001001
29082	1	0011001001 (1) 0001001001
30602	1	1110111100 (1) 1110011100
30601	1	1110111100 (1) 1010111100
30600	1	0110111100 (1) 0110011100
30599	1	0110111100 (1) 0010111100
30596	1	1100000101 (1) 1100000111
30595	1	1100000101 (1) 1100100101
30594	1	1100000101 (1) 1101000101
29952	1	1001110001 (1) 1001110101
29951	1	1001110001 (1) 1001111001
29950	1	1001110001 (1) 1001010001
29949	1	1001110001 (1) 1011110001
29100	1	1111001001 (1) 1111001011
29099	1	1111001001 (1) 1111001101
29098	1	1111001001 (1) 1111000001
29097	1	1111001001 (1) 1111101001
29096	1	1111001001 (1) 1110001001
29095	1	1111001001 (1) 1101001001
30583	1	0100000101 (1) 0100000111
30582	1	0100000101 (1) 0100100101
30581	1	0100000101 (1) 0101000101
30580	1	0100000101 (1) 0000000101
29963	1	0001110001 (1) 0001110101
29962	1	0001110001 (1) 0001111001
29961	1	0001110001 (1) 0001010001
29960	1	0001110001 (1) 0011110001
29044	1	0111001001 (1) 0111001011
29043	1	0111001001 (1) 0111001101
29042	1	0111001001 (1) 0111000001
29041	1	0111001001 (1) 0111101001
29040	1	0111001001 (1) 0110001001
29039	1	0111001001 (1) 0101001001
29038	1	0111001001 (1) 0011001001
29941	1	1101110001 (1) 1101110101
29940	1	1101110001 (1) 1101111001
29939	1	1101110001 (1) 1001110001
29908	1	0101110001 (1) 0101110101
29907	1	0101110001 (1) 0101111001
29906	1	0101110001 (1) 0001110001
29599	1	1010100110 (1) 1010100100
29598	1	1010100110 (1) 1010100010
29597	1	1010100110 (1) 1010110110
29596	1	1010100110 (1) 1110100110
29589	1	0010100110 (1) 0010100100
29588	1	0010100110 (1) 0010100010
29587	1	0010100110 (1) 0010110110
29005	1	0000101001 (1) 0000101101
29004	1	0000101001 (1) 0000100001
29003	1	0000101001 (1) 0000111001
29002	1	0000101001 (1) 0000001001
29001	1	0000101001 (1) 0001101001
29000	1	0000101001 (1) 0010101001
28985	1	1000101001 (1) 1000101101
28984	1	1000101001 (1) 1000100001
28983	1	1000101001 (1) 1000111001
28982	1	1000101001 (1) 1000001001
28981	1	1000101001 (1) 1001101001
28980	1	1000101001 (1) 1010101001
28979	1	1000101001 (1) 1100101001
29538	1	1110100110 (1) 1110100100
29537	1	1110100110 (1) 1110100010
29536	1	1110100110 (1) 1110110110
30928	1	1001011010 (1) 1001011110
30927	1	1001011010 (1) 1001010010
30926	1	1001011010 (1) 1001001010
30922	1	0001011010 (1) 0001011110
30921	1	0001011010 (1) 0001010010
30920	1	0001011010 (1) 0001001010
29535	1	0110100110 (1) 0110100100
29534	1	0110100110 (1) 0110100010
29533	1	0110100110 (1) 0110110110
29532	1	0110100110 (1) 0010100110
30468	1	0010000101 (1) 0010000111
30467	1	0010000101 (1) 0010100101
30479	1	1010000101 (1) 1010000111
30478	1	1010000101 (1) 1010100101
30477	1	1010000101 (1) 1110000101
28961	1	1100101001 (1) 1100101101
28960	1	1100101001 (1) 1100100001
28959	1	1100101001 (1) 1100111001
28958	1	1100101001 (1) 1100001001
28957	1	1100101001 (1) 1101101001
28942	1	0100101001 (1) 0100101101
28941	1	0100101001 (1) 0100100001
28940	1	0100101001 (1) 0100111001
28939	1	0100101001 (1) 0100001001
28938	1	0100101001 (1) 0101101001
28937	1	0100101001 (1) 0000101001
30466	1	1001111100 (1) 1001011100
30465	1	1001111100 (1) 1011111100
30913	1	1101011010 (1) 1101011110
30912	1	1101011010 (1) 1101010010
30911	1	1101011010 (1) 1101001010
30910	1	1101011010 (1) 1101111010
30909	1	1101011010 (1) 1001011010
30457	1	0001111100 (1) 0001011100
30456	1	0001111100 (1) 0011111100
30904	1	0101011010 (1) 0101011110
30903	1	0101011010 (1) 0101010010
30902	1	0101011010 (1) 0101001010
30901	1	0101011010 (1) 0101111010
30900	1	0101011010 (1) 0001011010
30439	1	1110000101 (1) 1110000111
30438	1	1110000101 (1) 1110100101
30437	1	1110000101 (1) 1100000101
29838	1	1011110001 (1) 1011110101
29837	1	1011110001 (1) 1011111001
29836	1	1011110001 (1) 1011010001
29835	1	1011110001 (1) 1010110001
30429	1	0110000101 (1) 0110000111
30428	1	0110000101 (1) 0110100101
30427	1	0110000101 (1) 0100000101
30426	1	0110000101 (1) 0010000101
29811	1	0011110001 (1) 0011110101
29810	1	0011110001 (1) 0011111001
29809	1	0011110001 (1) 0011010001
29808	1	0011110001 (1) 0010110001
30425	1	1101111100 (1) 1111111100
30424	1	1101111100 (1) 1001111100
30423	1	0101111100 (1) 0111111100
30422	1	0101111100 (1) 0001111100
29797	1	1111110001 (1) 1111110101
29796	1	1111110001 (1) 1111111001
29795	1	1111110001 (1) 1110110001
29794	1	1111110001 (1) 1101110001
29793	1	1111110001 (1) 1011110001
29768	1	0111110001 (1) 0111110101
29767	1	0111110001 (1) 0111111001
29766	1	0111110001 (1) 0110110001
29765	1	0111110001 (1) 0101110001
29764	1	0111110001 (1) 0011110001
28989	1	0010101001 (1) 0010101101
28988	1	0010101001 (1) 0010100001
28987	1	0010101001 (1) 0010111001
28986	1	0010101001 (1) 0010001001
28966	1	1010101001 (1) 1010101101
28965	1	1010101001 (1) 1010100001
28964	1	1010101001 (1) 1010111001
28963	1	1010101001 (1) 1010001001
28962	1	1010101001 (1) 1110101001
29337	1	1001100110 (1) 1001100100
29336	1	1001100110 (1) 1001100010
29335	1	1001100110 (1) 1001110110
29334	1	1001100110 (1) 1011100110
29333	1	1001100110 (1) 1101100110
30838	1	1000010110 (1) 1000010010
30837	1	1000010110 (1) 1000000110
30836	1	1000010110 (1) 1000110110
30835	1	1000010110 (1) 1001010110
30834	1	1000010110 (1) 1010010110
30890	1	1011011010 (1) 1011011110
30889	1	1011011010 (1) 1011010010
30888	1	1011011010 (1) 1011001010
30887	1	1011011010 (1) 1010011010
30886	1	1011011010 (1) 1001011010
29332	1	0001100110 (1) 0001100100
29331	1	0001100110 (1) 0001100010
29330	1	0001100110 (1) 0001110110
29329	1	0001100110 (1) 0011100110
30861	1	0000010110 (1) 0000010010
30860	1	0000010110 (1) 0000000110
30859	1	0000010110 (1) 0000110110
30858	1	0000010110 (1) 0001010110
30857	1	0000010110 (1) 0010010110
30876	1	0011011010 (1) 0011011110
30875	1	0011011010 (1) 0011010010
30874	1	0011011010 (1) 0011001010
30873	1	0011011010 (1) 0010011010
30872	1	0011011010 (1) 0001011010
28894	1	1110101001 (1) 1110101101
28893	1	1110101001 (1) 1110100001
28892	1	1110101001 (1) 1110111001
28891	1	1110101001 (1) 1110001001
28890	1	1110101001 (1) 1100101001
28880	1	0110101001 (1) 0110101101
28879	1	0110101001 (1) 0110100001
28878	1	0110101001 (1) 0110111001
28877	1	0110101001 (1) 0110001001
28876	1	0110101001 (1) 0100101001
28875	1	0110101001 (1) 0010101001
30346	1	0011111100 (1) 0011011100
30345	1	0011111100 (1) 0010111100
30338	1	1011111100 (1) 1011011100
30337	1	1011111100 (1) 1010111100
30763	1	1100010110 (1) 1100010010
30762	1	1100010110 (1) 1100000110
30761	1	1100010110 (1) 1100110110
30760	1	1100010110 (1) 1101010110
30759	1	1100010110 (1) 1000010110
30351	1	0001000101 (1) 0001000111
30350	1	0001000101 (1) 0001100101
30349	1	0001000101 (1) 0011000101
29292	1	1101100110 (1) 1101100100
29291	1	1101100110 (1) 1101100010
29290	1	1101100110 (1) 1101110110
29289	1	1101100110 (1) 1111100110
30781	1	0100010110 (1) 0100010010
30780	1	0100010110 (1) 0100000110
30779	1	0100010110 (1) 0100110110
30778	1	0100010110 (1) 0101010110
30777	1	0100010110 (1) 0000010110
30342	1	1001000101 (1) 1001000111
30341	1	1001000101 (1) 1001100101
30340	1	1001000101 (1) 1011000101
30339	1	1001000101 (1) 1101000101
29285	1	0101100110 (1) 0101100100
29284	1	0101100110 (1) 0101100010
29283	1	0101100110 (1) 0101110110
29282	1	0101100110 (1) 0111100110
29281	1	0101100110 (1) 0001100110
30814	1	0111011010 (1) 0111011110
30813	1	0111011010 (1) 0111010010
30812	1	0111011010 (1) 0111001010
30811	1	0111011010 (1) 0111111010
30810	1	0111011010 (1) 0110011010
30809	1	0111011010 (1) 0101011010
30808	1	0111011010 (1) 0011011010
30801	1	1111011010 (1) 1111011110
30800	1	1111011010 (1) 1111010010
30799	1	1111011010 (1) 1111001010
30798	1	1111011010 (1) 1111111010
30797	1	1111011010 (1) 1110011010
30796	1	1111011010 (1) 1101011010
30795	1	1111011010 (1) 1011011010
30331	1	1111111100 (1) 1110111100
30330	1	1111111100 (1) 1011111100
30329	1	0111111100 (1) 0110111100
30328	1	0111111100 (1) 0011111100
30325	1	1101000101 (1) 1101000111
30324	1	1101000101 (1) 1101100101
30318	1	0101000101 (1) 0101000111
[truncated: 2,100 more rows]
