# Supplementary material
Source: publisher figshare collection journal article supplement (https://springernature.figshare.com/ndownloader/files/17562821)
Supplement: Supplementary file 1 [file 17562821 › CytoscapeSession-2018_09_25-21_15/tables/26652-STG%2C+Model+2/SHARED_ATTRS-org.cytoscape.model.CyNetwork-STG%2C+Model+2+root+shared++network.cytable]

"CyCSV-Version","1"
"SUID","shared name"
"java.lang.Long","java.lang.String"
"",""
"STG, Model 2 root shared  network",""
"26668","Prot2_inputNodes_BothTogetherWin_STG.dot.sif"
"26652",""
