# Supplementary material
Source: publisher figshare collection journal article supplement (https://springernature.figshare.com/ndownloader/files/17562821)
Supplement: Supplementary file 1 [file 17562821 › CytoscapeSession-2018_09_25-21_15/tables/26652-STG%2C+Model+2/SHARED_ATTRS-org.cytoscape.model.CyNode-STG%2C+Model+2+root+shared++node.cytable]

CyCSV-Version	1
SUID	shared name
java.lang.Long	java.lang.String
STG, Model 2 root shared node
27701	0000000000
27700	0000000010
27699	0001000000
27698	1000000000
27697	1000000010
27696	1001000000
27695	1100000000
27694	1100000010
27693	1101000000
27692	0100000000
27691	0100000010
27690	0101000000
27689	1010000000
27688	1010000010
27687	1110000000
27686	0010000000
27685	0010000010
27684	1110000010
27683	0110000000
27682	0110000010
27681	0001000010
27680	1001000010
27679	1101000010
27678	1101100000
27677	0101000010
27676	0101100000
27675	1011000000
27674	1011000010
27673	1111000000
27672	0011000000
27671	0011000010
27670	1111000010
27669	1111100000
27668	0111000000
27667	0111000010
27666	0111100000
27665	1000100000
27664	1000110000
27663	1001100000
27662	1010100000
27661	1100100000
27660	0000100000
27659	0000110000
27658	0001100000
27657	0010100000
27656	1100110000
27655	0100100000
27654	0100110000
27653	1010110000
27652	1110100000
27651	0010110000
27650	1110110000
27649	0110100000
27648	0110110000
27647	1001110000
27646	1011100000
27645	1000010000
27644	1000010010
27643	1000011000
27642	1001010000
27641	0001110000
27640	0011100000
27639	0000010000
27638	0000010010
27637	0000011000
27636	0001010000
27635	1101110000
27634	1100010000
27633	1100010010
27632	1100011000
27631	1101010000
27630	0101110000
27629	0100010000
27628	0100010010
27627	0100011000
27626	0101010000
27625	1011110000
27624	1010010000
27623	1010010010
27622	1010011000
27621	0011110000
27620	0010010000
27619	0010010010
27618	0010011000
27617	1111110000
27616	1110010000
27615	1110010010
27614	1110011000
27613	0111110000
27612	0110010000
27611	0110010010
27610	0110011000
27609	1001010010
27608	1001011000
27607	0001010010
27606	0001011000
27605	1101010010
27604	1101011000
27603	0101010010
27602	0101011000
27601	1000001000
27600	1000001010
27599	1001001000
27598	1100001000
27597	0000001000
27596	0000001010
27595	0001001000
27594	1100001010
27593	1101001000
27592	0100001000
27591	0100001010
27590	0101001000
27589	1011010000
27588	1011010010
27587	1011011000
27586	0011010000
27585	0011010010
27584	0011011000
27583	0111010000
27582	0111010010
27581	0111011000
27580	1111010000
27579	1111010010
27578	1111011000
27577	1010001000
27576	1010001010
27575	1110001000
27574	0010001000
27573	0010001010
27572	1000111000
27571	1110001010
27570	0000111000
27569	0110001000
27568	0110001010
27567	1100111000
27566	0100111000
27565	1010111000
27564	1001001010
27563	0010111000
27562	0001001010
27561	1110111000
27560	1101001010
27559	1101101000
27558	0110111000
27557	0101001010
27556	0101101000
27555	1000000100
27554	1000000110
27553	1000100100
27552	1001000100
27551	1010000100
27550	1100000100
27549	1011001000
27548	1011001010
27547	1111001000
27546	0000000100
27545	0000000110
27544	0000100100
27543	0001000100
27542	0010000100
27541	0011001000
27540	0011001010
27539	1001111000
27538	1100000110
27537	1100100100
27536	1101000100
27535	1111001010
27534	1111101000
27533	0001111000
27532	0100000100
27531	0100000110
27530	0100100100
27529	0101000100
27528	0111001000
27527	0111001010
27526	0111101000
27525	1101111000
27524	0101111000
27523	0000101000
27522	0001101000
27521	0010101000
27520	1000101000
27519	1001101000
27518	1010101000
27517	1100101000
27516	1010000110
27515	1010100100
27514	1110000100
27513	0010000110
27512	0010100100
27511	0100101000
27510	1011111000
27509	1110000110
27508	1110100100
27507	0011111000
27506	0110000100
27505	0110000110
27504	0110100100
27503	1111111000
27502	0111111000
27501	1110101000
27500	0110101000
27499	1001000110
27498	1001100100
27497	1011000100
27496	0001000110
27495	0001100100
27494	0011000100
27493	1101000110
27492	1101100100
27491	0101000110
27490	0101100100
27489	1000011010
27488	1000011100
27487	0000011010
27486	0000011100
27485	0011101000
27484	1011101000
27483	1100011010
27482	1100011100
27481	1011000110
27480	1011100100
27479	1111000100
27478	0011000110
27477	0011100100
27476	0100011010
27475	0100011100
27474	1111000110
27473	1111100100
27472	0111000100
27471	0111000110
27470	0111100100
27469	1000110100
27468	1010011010
27467	1010011100
27466	0010011010
27465	0010011100
27464	0000110100
27463	1110011010
27462	1110011100
27461	1100110100
27460	0110011010
27459	0110011100
27458	0100110100
27457	1010110100
27456	0010110100
27455	1110110100
27454	1001011010
27453	1001011100
27452	0001011010
27451	0001011100
27450	0110110100
27449	1101011010
27448	1101011100
27447	0101011010
27446	0101011100
27445	1101100010
27444	1001110100
27443	1011011010
27442	1011011100
27441	0101100010
27440	0001110100
27439	0011011010
27438	0011011100
27437	0000010100
27436	0000010110
27435	0001010100
27434	0010010100
27433	1000010100
27432	1000010110
27431	1001010100
27430	1010010100
27429	1101110100
27428	0101110100
27427	0111011010
27426	0111011100
27425	1111011010
27424	1111011100
27423	0100010100
27422	0100010110
27421	0101010100
27420	1100010100
27419	1100010110
27418	1101010100
27417	1000111100
27416	0000111100
27415	1111100010
27414	1100111100
27413	1011110100
27412	0011110100
27411	0100111100
27410	0111100010
27409	0010010110
27408	1010010110
27407	1111110100
27406	0111110100
27405	0110010100
27404	0110010110
27403	1110010100
27402	1110010110
27401	1000100010
27400	1000110010
27399	1001100010
27398	1010100010
27397	1100100010
27396	0000100010
27395	0000110010
27394	0001100010
27393	0010100010
27392	1010111100
27391	1100110010
27390	0010111100
27389	0100100010
27388	0100110010
27387	0000000001
27386	0000000011
27385	0000000101
27384	0001000001
27383	1000000001
27382	1000000011
27381	1000000101
27380	1001000001
27379	1100000001
27378	1110111100
27377	0110111100
27376	1100000011
27375	1100000101
27374	1101000001
27373	0100000001
27372	0100000011
27371	0100000101
27370	0101000001
27369	0001010110
27368	0011010100
27367	1001010110
27366	1011010100
27365	1010110010
27364	1110100010
27363	0010110010
27362	0101010110
27361	1101010110
27360	1110110010
27359	1000001100
27358	1000001110
27357	1001001100
27356	1010001100
27355	1100001100
27354	0000001100
27353	0000001110
27352	0001001100
27351	0010001100
27350	0110100010
27349	0110110010
27348	1010000001
27347	1010000011
27346	1010000101
27345	1110000001
27344	0010000001
27343	0010000011
27342	0010000101
27341	1001111100
27340	1100001110
27339	1101001100
27338	0001111100
27337	0100001100
27336	0100001110
27335	0101001100
27334	1110000011
27333	1110000101
27332	0110000001
27331	0110000011
27330	0110000101
27329	1101111100
27328	0101111100
27327	0011010110
27326	1011010110
27325	0111010100
27324	0111010110
27323	1111010100
27322	1111010110
27321	1010001110
27320	1110001100
27319	1001110010
27318	1011100010
27317	0010001110
27316	0001110010
27315	0011100010
27314	0110001100
27313	0110001110
27312	0001000011
27311	0001000101
27310	1101110010
27309	0011111100
27308	1001000011
27307	1001000101
27306	1011111100
27305	1110001110
27304	0101110010
27303	1111111100
27302	0111111100
27301	1101000011
27300	1101000101
27299	1101100001
27298	0101000011
27297	0101000101
27296	0101100001
27295	1011110010
27294	0011110010
27293	0111110010
27292	1111110010
27291	1001001110
27290	1011001100
27289	0001001110
27288	0011001100
27287	0011000001
27286	0011000011
27285	0011000101
27284	1011000001
27283	1011000011
27282	1011000101
27281	1111000001
27280	1101001110
27279	1101101100
27278	0101001110
27277	0101101100
27276	1111000011
27275	1111000101
27274	1111100001
27273	0111000001
27272	0111000011
27271	0111000101
27270	0111100001
27269	0000100001
27268	0000100101
27267	0000110001
27266	0001100001
27265	0010100001
27264	1000100001
27263	1000100101
27262	1000110001
27261	1001100001
27260	1010100001
27259	1100100001
27258	1011001110
27257	1111001100
27256	0011001110
27255	1100100101
27254	1100110001
27253	0100100001
27252	0100100101
27251	0100110001
27250	1111001110
27249	1111101100
27248	0111001100
27247	0111001110
27246	0111101100
27245	0000101100
27244	0001101100
27243	0010101100
27242	1000101100
27241	1001101100
27240	1010101100
27239	1100101100
27238	0010100101
27237	0010110001
27236	1010100101
27235	1010110001
27234	1110100001
27233	1110101100
27232	0100101100
27231	0110101100
27230	1110100101
27229	1110110001
27228	0110100001
27227	0110100101
27226	0110110001
27225	1000010001
27224	1000010011
27223	1000010101
27222	1000011001
27221	1001010001
27220	0000010001
27219	0000010011
27218	0000010101
27217	0000011001
27216	0001010001
27215	0001100101
27214	0001110001
27213	0011100001
27212	1001100101
27211	1001110001
27210	1011100001
27209	1101100101
27208	1101110001
27207	1100010001
27206	1100010011
27205	1100010101
27204	1100011001
27203	1101010001
27202	0101100101
27201	0101110001
27200	0100010001
27199	0100010011
27198	0100010101
27197	0100011001
27196	0101010001
27195	1000011110
27194	1101101010
27193	1011101100
27192	1010010001
27191	1010010011
27190	1010010101
27189	1010011001
27188	0000011110
27187	0101101010
27186	1011100101
27185	1011110001
27184	0011101100
27183	0010010001
27182	0010010011
27181	0010010101
27180	0010011001
27179	0011100101
27178	0011110001
27177	1100011110
27176	0100011110
27175	1111100101
27174	1111110001
27173	1110010001
27172	1110010011
27171	1110010101
27170	1110011001
27169	0111100101
27168	0111110001
27167	0110010001
27166	0110010011
27165	0110010101
27164	0110011001
27163	1000100110
27162	0000100110
27161	0010011110
27160	1010011110
27159	0111101010
27158	1100100110
27157	1111101010
27156	0100100110
27155	1110011110
27154	0110011110
27153	1001010011
27152	1001010101
27151	1001011001
27150	0001010011
27149	0001010101
27148	0001011001
27147	0000101010
27146	0000111010
27145	0001101010
27144	0010101010
27143	1000101010
27142	1000111010
27141	1001101010
27140	1010101010
27139	1100101010
27138	1101010011
27137	1101010101
27136	1101011001
27135	0101010011
27134	0101010101
27133	0101011001
27132	1010100110
27131	1100111010
27130	0010100110
27129	0100101010
27128	0100111010
27127	1000001001
27126	1000001011
27125	1000001101
27124	1001001001
27123	1100001001
27122	0000001001
27121	0000001011
27120	0000001101
27119	0001001001
27118	1110100110
27117	0110100110
27116	1100001011
27115	1100001101
27114	1101001001
27113	0100001001
27112	0100001011
27111	0100001101
27110	0101001001
27109	1001011110
27108	0001011110
27107	1011010001
27106	1011010011
27105	1011010101
27104	1011011001
27103	0011010001
27102	0011010011
27101	0011010101
27100	0011011001
27099	1101011110
27098	0010111010
27097	0101011110
27096	1010111010
27095	1110101010
27094	0111010001
27093	0111010011
27092	0111010101
27091	0111011001
27090	1111010001
27089	1111010011
27088	1111010101
27087	1111011001
27086	1110111010
27085	0110101010
27084	0110111010
27083	1010001001
27082	1010001011
27081	1010001101
27080	1110001001
27079	0010001001
27078	0010001011
27077	0010001101
27076	1001100110
27075	0001100110
27074	1110001011
27073	1110001101
27072	1000110101
27071	1000111001
27070	0110001001
27069	0110001011
27068	0110001101
27067	0000110101
27066	0000111001
27065	1011011110
27064	1101100110
27063	0011011110
27062	0101100110
27061	1100110101
27060	1100111001
27059	0100110101
27058	0100111001
27057	0111011110
27056	1111011110
27055	0001111010
27054	0011101010
27053	1001111010
27052	1011101010
27051	1101111010
27050	1010110101
27049	1010111001
27048	1011100110
27047	0010110101
27046	0010111001
27045	1001001011
27044	1001001101
27043	0011100110
27042	0001001011
27041	0001001101
27040	0101111010
27039	1111100110
27038	0111100110
27037	1101001011
27036	1101001101
27035	1101101001
27034	1110110101
27033	1110111001
27032	0101001011
27031	0101001101
27030	0101101001
27029	0110110101
27028	0110111001
27027	1000110110
27026	0000110110
27025	0011111010
27024	1011111010
27023	1100110110
27022	1111111010
27021	1000000111
27020	0111111010
27019	1011001001
27018	1011001011
27017	1011001101
27016	1111001001
27015	0000000111
27014	0100110110
27013	0011001001
27012	0011001011
27011	0011001101
27010	1100000111
27009	1001110101
27008	1001111001
27007	1111001011
27006	1111001101
27005	1111101001
27004	0100000111
27003	0001110101
27002	0001111001
27001	0111001001
27000	0111001011
26999	0111001101
26998	0111101001
26997	1101110101
26996	1101111001
26995	0101110101
26994	0101111001
26993	1010110110
26992	0010110110
26991	0000101001
26990	0000101101
26989	0001101001
26988	0010101001
26987	1000101001
26986	1000101101
26985	1001101001
26984	1010101001
26983	1100101001
26982	1110110110
26981	0110110110
26980	0010000111
26979	1010000111
26978	1100101101
26977	0100101001
26976	0100101101
26975	1110000111
26974	1011110101
26973	1011111001
26972	0110000111
26971	0011110101
26970	0011111001
26969	1111110101
26968	1111111001
26967	0111110101
26966	0111111001
26965	0010101101
26964	1010101101
26963	1110101001
26962	1001110110
26961	0001110110
26960	1110101101
26959	0110101001
26958	0110101101
26957	0001000111
26956	1101110110
26955	1001000111
26954	0101110110
26953	1101000111
26952	0101000111
26951	1000111110
26950	0000111110
26949	1011110110
26948	1100111110
26947	0011110110
26946	0100111110
26945	0001101101
26944	0011101001
26943	1000011011
26942	1000011101
26941	0000011011
26940	0000011101
26939	1001101101
26938	1011101001
26937	1100011011
26936	1100011101
26935	0111110110
26934	1111110110
26933	0011000111
26932	1011000111
26931	1101101101
26930	0101101101
26929	0100011011
26928	0100011101
26927	1111000111
26926	0111000111
26925	1010111110
26924	0010111110
26923	0110111110
26922	1110111110
26921	1010011011
26920	1010011101
26919	0011101101
26918	0010011011
26917	0010011101
26916	1011101101
26915	1110011011
26914	1110011101
26913	1111101101
26912	0110011011
26911	0110011101
26910	0111101101
26909	1001111110
26908	0001111110
26907	1101111110
26906	0101111110
26905	1001011011
26904	1001011101
26903	0001011011
26902	0001011101
26901	1101011011
26900	1101011101
26899	0101011011
26898	0101011101
26897	1011111110
26896	0011111110
26895	1111111110
26894	0111111110
26893	1000010111
26892	0011011011
26891	0011011101
26890	0000010111
26889	0101100011
26888	1011011011
26887	1011011101
26886	1101100011
26885	1100010111
26884	0100010111
26883	0111011011
26882	0111011101
26881	1111011011
26880	1111011101
26879	1000111101
26878	0000111101
26877	1010010111
26876	1101101110
26875	0101101110
26874	0111100011
26873	1100111101
26872	0100111101
26871	0010010111
26870	1111100011
26869	1110010111
26868	0110010111
26867	0000100011
26866	0000100111
26865	0000110011
26864	0001100011
26863	0010100011
26862	1000100011
26861	1000100111
26860	1000110011
26859	1001100011
26858	1010100011
26857	1100100011
26856	1010111101
26855	1100100111
26854	1100110011
26853	0010111101
26852	0100100011
26851	0100100111
26850	0100110011
26849	1111101110
26848	0111101110
26847	1110111101
26846	0110111101
26845	1001010111
26844	0001010111
26843	0000101110
26842	0001101110
26841	0010101110
26840	1000101110
26839	1001101110
26838	1010101110
26837	1100101110
26836	1101010111
26835	0010100111
26834	0010110011
26833	0101010111
26832	1010100111
26831	1010110011
26830	1110100011
26829	1110101110
26828	0100101110
26827	0110101110
26826	0000001111
26825	1000001111
26824	1110100111
26823	1110110011
26822	0110100011
26821	0110100111
26820	0110110011
26819	1100001111
26818	1001111101
26817	0100001111
26816	0001111101
26815	1101111101
26814	1011010111
26813	0101111101
26812	0011010111
26811	0111010111
26810	1111010111
26809	0010001111
26808	1010001111
26807	0001100111
26806	0001110011
26805	0011100011
26804	1001100111
26803	1001110011
26802	1011100011
26801	1011111101
26800	1110001111
26799	0011111101
26798	1101100111
26797	1101110011
26796	0110001111
26795	0101100111
26794	0101110011
26793	1111111101
26792	0111111101
26791	0011101110
26790	1011101110
26789	0011100111
26788	0011110011
26787	1011100111
26786	1011110011
26785	1111100111
26784	1111110011
26783	1001001111
26782	0111100111
26781	0111110011
26780	0001001111
26779	1101001111
26778	0101001111
26777	0011001111
26776	1011001111
26775	1111001111
26774	0111001111
26773	1000110111
26772	0000110111
26771	1100110111
26770	0100110111
26769	1010110111
26768	0010110111
26767	0000011111
26766	1000011111
26765	1101101011
26764	1110110111
26763	0110110111
26762	0101101011
26761	1100011111
26760	0100011111
26759	0010011111
26758	1010011111
26757	1001110111
26756	1111101011
26755	0111101011
26754	0001110111
26753	1110011111
26752	1101110111
26751	0110011111
26750	0101110111
26749	0000101011
26748	0000101111
26747	0000111011
26746	0001101011
26745	0010101011
26744	1000101011
26743	1000101111
26742	1000111011
26741	1001101011
26740	1010101011
26739	1100101011
26738	1100101111
26737	1100111011
26736	0100101011
26735	0100101111
26734	0100111011
26733	1011110111
26732	0011110111
26731	0001011111
26730	1001011111
26729	1111110111
26728	0111110111
26727	1101011111
26726	0101011111
26725	0010101111
26724	0010111011
26723	1010101111
26722	1010111011
26721	1110101011
26720	1110101111
26719	1110111011
26718	0110101011
26717	0110101111
26716	0110111011
26715	0011011111
26714	1011011111
26713	0111011111
26712	1111011111
26711	0001101111
26710	0001111011
26709	0011101011
26708	1001101111
26707	1001111011
26706	1011101011
26705	1101101111
26704	1101111011
26703	0101101111
26702	0101111011
26701	0011101111
26700	0011111011
26699	1011101111
26698	1011111011
26697	1111101111
26696	1111111011
26695	0111101111
26694	0111111011
26693	1000111111
26692	0000111111
26691	1100111111
26690	0100111111
26689	1010111111
26688	0010111111
26687	1110111111
26686	0110111111
26685	1001111111
26684	0001111111
26683	1101111111
26682	0101111111
26681	1011111111
26680	0011111111
26679	1111111111
26678	0111111111
