# Supplementary material
Source: publisher figshare collection journal article supplement (https://springernature.figshare.com/ndownloader/files/17562821)
Supplement: Supplementary file 1 [file 17562821 › CytoscapeSession-2018_09_25-21_15/tables/26668-STG%2C+Model+2/HIDDEN-org.cytoscape.model.CyNetwork-26668+hidden+network.cytable]

"CyCSV-Version","1"
"SUID","layoutAlgorithm"
"java.lang.Long","java.lang.String"
"",""
"26668 hidden network",""
"26668","Prefuse Force Directed Layout"
