# Supplementary material
Source: publisher figshare collection journal article supplement (https://springernature.figshare.com/ndownloader/files/17562821)
Supplement: Supplementary file 1 [file 17562821 › CytoscapeSession-2018_09_25-21_15/tables/26668-STG%2C+Model+2/LOCAL_ATTRS-org.cytoscape.model.CyEdge-STG%2C+Model+2+default++edge.cytable]

CyCSV-Version	1
SUID	interaction	name	selected
java.lang.Long	java.lang.String	java.lang.String	java.lang.Boolean
STG, Model 2 default edge
27702	1	0111111111 (1) 0011111111	false
27703	1	0111111111 (1) 0110111111	false
27704	1	0111111111 (1) 0111110111	false
27705	1	0111111111 (1) 0111111101	false
27706	1	1111111111 (1) 1011111111	false
27707	1	1111111111 (1) 1110111111	false
27708	1	1111111111 (1) 1111110111	false
27709	1	1111111111 (1) 1111111101	false
27710	1	0011111111 (1) 0010111111	false
27711	1	0011111111 (1) 0011011111	false
27712	1	0011111111 (1) 0011110111	false
27713	1	0011111111 (1) 0011111101	false
27714	1	1011111111 (1) 1010111111	false
27715	1	1011111111 (1) 1011011111	false
27716	1	1011111111 (1) 1011110111	false
27717	1	1011111111 (1) 1011111101	false
27718	1	0101111111 (1) 0001111111	false
27719	1	0101111111 (1) 0111111111	false
27720	1	0101111111 (1) 0101110111	false
27721	1	0101111111 (1) 0101111101	false
27722	1	1101111111 (1) 1001111111	false
27723	1	1101111111 (1) 1111111111	false
27724	1	1101111111 (1) 1101110111	false
27725	1	1101111111 (1) 1101111101	false
27726	1	0001111111 (1) 0011111111	false
27727	1	0001111111 (1) 0001011111	false
27728	1	0001111111 (1) 0001110111	false
27729	1	0001111111 (1) 0001111101	false
27730	1	1001111111 (1) 1011111111	false
27731	1	1001111111 (1) 1001011111	false
27732	1	1001111111 (1) 1001110111	false
27733	1	1001111111 (1) 1001111101	false
27734	1	0110111111 (1) 0010111111	false
27735	1	0110111111 (1) 0110011111	false
27736	1	0110111111 (1) 0110110111	false
27737	1	0110111111 (1) 0110111101	false
27738	1	1110111111 (1) 1010111111	false
27739	1	1110111111 (1) 1110011111	false
27740	1	1110111111 (1) 1110110111	false
27741	1	1110111111 (1) 1110111101	false
27742	1	0010111111 (1) 0010011111	false
27743	1	0010111111 (1) 0010110111	false
27744	1	0010111111 (1) 0010111101	false
27745	1	1010111111 (1) 1010011111	false
27746	1	1010111111 (1) 1010110111	false
27747	1	1010111111 (1) 1010111101	false
27748	1	0100111111 (1) 0000111111	false
27749	1	0100111111 (1) 0110111111	false
27750	1	0100111111 (1) 0101111111	false
27751	1	0100111111 (1) 0100011111	false
27752	1	0100111111 (1) 0100110111	false
27753	1	0100111111 (1) 0100111101	false
27754	1	1100111111 (1) 1000111111	false
27755	1	1100111111 (1) 1110111111	false
27756	1	1100111111 (1) 1101111111	false
27757	1	1100111111 (1) 1100011111	false
27758	1	1100111111 (1) 1100110111	false
27759	1	1100111111 (1) 1100111101	false
27760	1	0000111111 (1) 0010111111	false
27761	1	0000111111 (1) 0001111111	false
27762	1	0000111111 (1) 0000011111	false
27763	1	0000111111 (1) 0000110111	false
27764	1	0000111111 (1) 0000111101	false
27765	1	1000111111 (1) 1010111111	false
27766	1	1000111111 (1) 1001111111	false
27767	1	1000111111 (1) 1000011111	false
27768	1	1000111111 (1) 1000110111	false
27769	1	1000111111 (1) 1000111101	false
27770	1	0111111011 (1) 0011111011	false
27771	1	0111111011 (1) 0101111011	false
27772	1	0111111011 (1) 0110111011	false
27773	1	0111111011 (1) 0111110011	false
27774	1	0111111011 (1) 0111111111	false
27775	1	0111111011 (1) 0111111001	false
27776	1	0111101111 (1) 0011101111	false
27777	1	0111101111 (1) 0110101111	false
27778	1	0111101111 (1) 0111111111	false
27779	1	0111101111 (1) 0111100111	false
27780	1	0111101111 (1) 0111101101	false
27781	1	1111111011 (1) 1011111011	false
27782	1	1111111011 (1) 1101111011	false
27783	1	1111111011 (1) 1110111011	false
27784	1	1111111011 (1) 1111110011	false
27785	1	1111111011 (1) 1111111111	false
27786	1	1111111011 (1) 1111111001	false
27787	1	1111101111 (1) 1110101111	false
27788	1	1111101111 (1) 1111111111	false
27789	1	1111101111 (1) 1111100111	false
27790	1	1111101111 (1) 1111101101	false
27791	1	1011111011 (1) 1010111011	false
27792	1	1011111011 (1) 1011011011	false
27793	1	1011111011 (1) 1011110011	false
27794	1	1011111011 (1) 1011111111	false
27795	1	1011111011 (1) 1011111001	false
27796	1	1011101111 (1) 1111101111	false
27797	1	1011101111 (1) 1010101111	false
27798	1	1011101111 (1) 1011001111	false
27799	1	1011101111 (1) 1011111111	false
27800	1	1011101111 (1) 1011100111	false
27801	1	1011101111 (1) 1011101101	false
27802	1	0011111011 (1) 0010111011	false
27803	1	0011111011 (1) 0011011011	false
27804	1	0011111011 (1) 0011110011	false
27805	1	0011111011 (1) 0011111111	false
27806	1	0011111011 (1) 0011111001	false
27807	1	0011101111 (1) 0010101111	false
27808	1	0011101111 (1) 0011001111	false
27809	1	0011101111 (1) 0011111111	false
27810	1	0011101111 (1) 0011100111	false
27811	1	0011101111 (1) 0011101101	false
27812	1	0101111011 (1) 0001111011	false
27813	1	0101111011 (1) 0101110011	false
27814	1	0101111011 (1) 0101111111	false
27815	1	0101111011 (1) 0101111001	false
27816	1	0101101111 (1) 0001101111	false
27817	1	0101101111 (1) 0111101111	false
27818	1	0101101111 (1) 0101111111	false
27819	1	0101101111 (1) 0101100111	false
27820	1	0101101111 (1) 0101101101	false
27821	1	1101111011 (1) 1001111011	false
27822	1	1101111011 (1) 1101110011	false
27823	1	1101111011 (1) 1101111111	false
27824	1	1101111011 (1) 1101111001	false
27825	1	1101101111 (1) 1111101111	false
27826	1	1101101111 (1) 1101111111	false
27827	1	1101101111 (1) 1101100111	false
27828	1	1101101111 (1) 1101101101	false
27829	1	1011101011 (1) 1111101011	false
27830	1	1011101011 (1) 1010101011	false
27831	1	1011101011 (1) 1011001011	false
27832	1	1011101011 (1) 1011111011	false
27833	1	1011101011 (1) 1011100011	false
27834	1	1011101011 (1) 1011101111	false
27835	1	1011101011 (1) 1011101001	false
27836	1	1001111011 (1) 1011111011	false
27837	1	1001111011 (1) 1001011011	false
27838	1	1001111011 (1) 1001110011	false
27839	1	1001111011 (1) 1001111111	false
27840	1	1001111011 (1) 1001111001	false
27841	1	1001101111 (1) 1101101111	false
27842	1	1001101111 (1) 1011101111	false
27843	1	1001101111 (1) 1001001111	false
27844	1	1001101111 (1) 1001111111	false
27845	1	1001101111 (1) 1001100111	false
27846	1	1001101111 (1) 1001101101	false
27847	1	0011101011 (1) 0010101011	false
27848	1	0011101011 (1) 0011001011	false
27849	1	0011101011 (1) 0011111011	false
27850	1	0011101011 (1) 0011100011	false
27851	1	0011101011 (1) 0011101111	false
27852	1	0011101011 (1) 0011101001	false
27853	1	0001111011 (1) 0011111011	false
27854	1	0001111011 (1) 0001011011	false
27855	1	0001111011 (1) 0001110011	false
27856	1	0001111011 (1) 0001111111	false
27857	1	0001111011 (1) 0001111001	false
27858	1	0001101111 (1) 0011101111	false
27859	1	0001101111 (1) 0001001111	false
27860	1	0001101111 (1) 0001111111	false
27861	1	0001101111 (1) 0001100111	false
27862	1	0001101111 (1) 0001101101	false
27863	1	1111011111 (1) 1011011111	false
27864	1	1111011111 (1) 1101011111	false
27865	1	1111011111 (1) 1110011111	false
27866	1	1111011111 (1) 1111111111	false
27867	1	1111011111 (1) 1111001111	false
27868	1	1111011111 (1) 1111010111	false
27869	1	0111011111 (1) 0011011111	false
27870	1	0111011111 (1) 0101011111	false
27871	1	0111011111 (1) 0110011111	false
27872	1	0111011111 (1) 0111111111	false
27873	1	0111011111 (1) 0111001111	false
27874	1	0111011111 (1) 0111010111	false
27875	1	1011011111 (1) 1010011111	false
27876	1	1011011111 (1) 1011001111	false
27877	1	1011011111 (1) 1011010111	false
27878	1	0011011111 (1) 0010011111	false
27879	1	0011011111 (1) 0011001111	false
27880	1	0011011111 (1) 0011010111	false
27881	1	0110111011 (1) 0010111011	false
27882	1	0110111011 (1) 0100111011	false
27883	1	0110111011 (1) 0110011011	false
27884	1	0110111011 (1) 0110110011	false
27885	1	0110111011 (1) 0110111111	false
27886	1	0110111011 (1) 0110111001	false
27887	1	0110101111 (1) 0010101111	false
27888	1	0110101111 (1) 0110001111	false
27889	1	0110101111 (1) 0110111111	false
27890	1	0110101111 (1) 0110100111	false
27891	1	0110101111 (1) 0110101101	false
27892	1	0110101011 (1) 0010101011	false
27893	1	0110101011 (1) 0100101011	false
27894	1	0110101011 (1) 0110001011	false
27895	1	0110101011 (1) 0110111011	false
27896	1	0110101011 (1) 0110100011	false
27897	1	0110101011 (1) 0110101111	false
27898	1	0110101011 (1) 0110101001	false
27899	1	1110111011 (1) 1010111011	false
27900	1	1110111011 (1) 1100111011	false
27901	1	1110111011 (1) 1110011011	false
27902	1	1110111011 (1) 1110110011	false
27903	1	1110111011 (1) 1110111111	false
27904	1	1110111011 (1) 1110111001	false
27905	1	1110101111 (1) 1110001111	false
27906	1	1110101111 (1) 1110111111	false
27907	1	1110101111 (1) 1110100111	false
27908	1	1110101111 (1) 1110101101	false
27909	1	1110101011 (1) 1100101011	false
27910	1	1110101011 (1) 1110001011	false
27911	1	1110101011 (1) 1110111011	false
27912	1	1110101011 (1) 1110100011	false
27913	1	1110101011 (1) 1110101111	false
27914	1	1110101011 (1) 1110101001	false
27915	1	1010111011 (1) 1010011011	false
27916	1	1010111011 (1) 1010110011	false
27917	1	1010111011 (1) 1010111111	false
27918	1	1010111011 (1) 1010111001	false
27919	1	1010101111 (1) 1110101111	false
27920	1	1010101111 (1) 1010001111	false
27921	1	1010101111 (1) 1010111111	false
27922	1	1010101111 (1) 1010100111	false
27923	1	1010101111 (1) 1010101101	false
27924	1	0010111011 (1) 0010011011	false
27925	1	0010111011 (1) 0010110011	false
27926	1	0010111011 (1) 0010111111	false
27927	1	0010111011 (1) 0010111001	false
27928	1	0010101111 (1) 0010001111	false
27929	1	0010101111 (1) 0010111111	false
27930	1	0010101111 (1) 0010100111	false
27931	1	0010101111 (1) 0010101101	false
27932	1	0101011111 (1) 0001011111	false
27933	1	0101011111 (1) 0101111111	false
27934	1	0101011111 (1) 0101001111	false
27935	1	0101011111 (1) 0101010111	false
27936	1	1101011111 (1) 1001011111	false
27937	1	1101011111 (1) 1101111111	false
27938	1	1101011111 (1) 1101001111	false
27939	1	1101011111 (1) 1101010111	false
27940	1	0111110111 (1) 0011110111	false
27941	1	0111110111 (1) 0110110111	false
27942	1	0111110111 (1) 0111110101	false
27943	1	1111110111 (1) 1011110111	false
27944	1	1111110111 (1) 1110110111	false
27945	1	1111110111 (1) 1111110101	false
27946	1	1001011111 (1) 1011011111	false
27947	1	1001011111 (1) 1001001111	false
27948	1	1001011111 (1) 1001010111	false
27949	1	0001011111 (1) 0011011111	false
27950	1	0001011111 (1) 0001001111	false
27951	1	0001011111 (1) 0001010111	false
27952	1	0011110111 (1) 0010110111	false
27953	1	0011110111 (1) 0011110101	false
27954	1	1011110111 (1) 1010110111	false
27955	1	1011110111 (1) 1011110101	false
27956	1	0100111011 (1) 0000111011	false
27957	1	0100111011 (1) 0101111011	false
27958	1	0100111011 (1) 0100011011	false
27959	1	0100111011 (1) 0100110011	false
27960	1	0100111011 (1) 0100111111	false
27961	1	0100111011 (1) 0100111001	false
27962	1	0100101111 (1) 0000101111	false
27963	1	0100101111 (1) 0110101111	false
27964	1	0100101111 (1) 0101101111	false
27965	1	0100101111 (1) 0100001111	false
27966	1	0100101111 (1) 0100111111	false
27967	1	0100101111 (1) 0100100111	false
27968	1	0100101111 (1) 0100101101	false
27969	1	0100101011 (1) 0000101011	false
27970	1	0100101011 (1) 0101101011	false
27971	1	0100101011 (1) 0100001011	false
27972	1	0100101011 (1) 0100111011	false
27973	1	0100101011 (1) 0100100011	false
27974	1	0100101011 (1) 0100101111	false
27975	1	0100101011 (1) 0100101001	false
27976	1	1100111011 (1) 1000111011	false
27977	1	1100111011 (1) 1101111011	false
27978	1	1100111011 (1) 1100011011	false
27979	1	1100111011 (1) 1100110011	false
27980	1	1100111011 (1) 1100111111	false
27981	1	1100111011 (1) 1100111001	false
27982	1	1100101111 (1) 1110101111	false
27983	1	1100101111 (1) 1101101111	false
27984	1	1100101111 (1) 1100001111	false
27985	1	1100101111 (1) 1100111111	false
27986	1	1100101111 (1) 1100100111	false
27987	1	1100101111 (1) 1100101101	false
27988	1	1100101011 (1) 1101101011	false
27989	1	1100101011 (1) 1100001011	false
27990	1	1100101011 (1) 1100111011	false
27991	1	1100101011 (1) 1100100011	false
27992	1	1100101011 (1) 1100101111	false
27993	1	1100101011 (1) 1100101001	false
27994	1	1010101011 (1) 1110101011	false
27995	1	1010101011 (1) 1010001011	false
27996	1	1010101011 (1) 1010111011	false
27997	1	1010101011 (1) 1010100011	false
27998	1	1010101011 (1) 1010101111	false
27999	1	1010101011 (1) 1010101001	false
28000	1	1001101011 (1) 1101101011	false
28001	1	1001101011 (1) 1011101011	false
28002	1	1001101011 (1) 1001001011	false
28003	1	1001101011 (1) 1001111011	false
28004	1	1001101011 (1) 1001100011	false
28005	1	1001101011 (1) 1001101111	false
28006	1	1001101011 (1) 1001101001	false
28007	1	1000111011 (1) 1010111011	false
28008	1	1000111011 (1) 1001111011	false
28009	1	1000111011 (1) 1000011011	false
28010	1	1000111011 (1) 1000110011	false
28011	1	1000111011 (1) 1000111111	false
28012	1	1000111011 (1) 1000111001	false
28013	1	1000101111 (1) 1100101111	false
28014	1	1000101111 (1) 1010101111	false
28015	1	1000101111 (1) 1001101111	false
28016	1	1000101111 (1) 1000001111	false
28017	1	1000101111 (1) 1000111111	false
28018	1	1000101111 (1) 1000100111	false
28019	1	1000101111 (1) 1000101101	false
28020	1	1000101011 (1) 1100101011	false
28021	1	1000101011 (1) 1010101011	false
28022	1	1000101011 (1) 1001101011	false
28023	1	1000101011 (1) 1000001011	false
28024	1	1000101011 (1) 1000111011	false
28025	1	1000101011 (1) 1000100011	false
28026	1	1000101011 (1) 1000101111	false
28027	1	1000101011 (1) 1000101001	false
28028	1	0010101011 (1) 0010001011	false
28029	1	0010101011 (1) 0010111011	false
28030	1	0010101011 (1) 0010100011	false
28031	1	0010101011 (1) 0010101111	false
28032	1	0010101011 (1) 0010101001	false
28033	1	0001101011 (1) 0011101011	false
28034	1	0001101011 (1) 0001001011	false
28035	1	0001101011 (1) 0001111011	false
28036	1	0001101011 (1) 0001100011	false
28037	1	0001101011 (1) 0001101111	false
28038	1	0001101011 (1) 0001101001	false
28039	1	0000111011 (1) 0010111011	false
28040	1	0000111011 (1) 0001111011	false
28041	1	0000111011 (1) 0000011011	false
28042	1	0000111011 (1) 0000110011	false
28043	1	0000111011 (1) 0000111111	false
28044	1	0000111011 (1) 0000111001	false
28045	1	0000101111 (1) 0010101111	false
28046	1	0000101111 (1) 0001101111	false
28047	1	0000101111 (1) 0000001111	false
28048	1	0000101111 (1) 0000111111	false
28049	1	0000101111 (1) 0000100111	false
28050	1	0000101111 (1) 0000101101	false
28051	1	0000101011 (1) 0010101011	false
28052	1	0000101011 (1) 0001101011	false
28053	1	0000101011 (1) 0000001011	false
28054	1	0000101011 (1) 0000111011	false
28055	1	0000101011 (1) 0000100011	false
28056	1	0000101011 (1) 0000101111	false
28057	1	0000101011 (1) 0000101001	false
28058	1	0101110111 (1) 0001110111	false
28059	1	0101110111 (1) 0111110111	false
28060	1	0101110111 (1) 0101110101	false
28061	1	0110011111 (1) 0010011111	false
28062	1	0110011111 (1) 0100011111	false
28063	1	0110011111 (1) 0110001111	false
28064	1	0110011111 (1) 0110010111	false
28065	1	1101110111 (1) 1001110111	false
28066	1	1101110111 (1) 1111110111	false
28067	1	1101110111 (1) 1101110101	false
28068	1	1110011111 (1) 1010011111	false
28069	1	1110011111 (1) 1100011111	false
28070	1	1110011111 (1) 1110001111	false
28071	1	1110011111 (1) 1110010111	false
28072	1	0001110111 (1) 0011110111	false
28073	1	0001110111 (1) 0001110101	false
28074	1	0111101011 (1) 0011101011	false
28075	1	0111101011 (1) 0101101011	false
28076	1	0111101011 (1) 0110101011	false
28077	1	0111101011 (1) 0111111011	false
28078	1	0111101011 (1) 0111100011	false
28079	1	0111101011 (1) 0111101111	false
28080	1	0111101011 (1) 0111101001	false
28081	1	1111101011 (1) 1101101011	false
28082	1	1111101011 (1) 1110101011	false
28083	1	1111101011 (1) 1111111011	false
28084	1	1111101011 (1) 1111100011	false
28085	1	1111101011 (1) 1111101111	false
28086	1	1111101011 (1) 1111101001	false
28087	1	1001110111 (1) 1011110111	false
28088	1	1001110111 (1) 1001110101	false
28089	1	1010011111 (1) 1010001111	false
28090	1	1010011111 (1) 1010010111	false
28091	1	0010011111 (1) 0010001111	false
28092	1	0010011111 (1) 0010010111	false
28093	1	0100011111 (1) 0000011111	false
28094	1	0100011111 (1) 0101011111	false
28095	1	0100011111 (1) 0100001111	false
28096	1	0100011111 (1) 0100010111	false
28097	1	1100011111 (1) 1000011111	false
28098	1	1100011111 (1) 1101011111	false
28099	1	1100011111 (1) 1100001111	false
28100	1	1100011111 (1) 1100010111	false
28101	1	0101101011 (1) 0001101011	false
28102	1	0101101011 (1) 0101111011	false
28103	1	0101101011 (1) 0101100011	false
28104	1	0101101011 (1) 0101101111	false
28105	1	0101101011 (1) 0101101001	false
28106	1	0110110111 (1) 0010110111	false
28107	1	0110110111 (1) 0110110101	false
28108	1	1110110111 (1) 1010110111	false
28109	1	1110110111 (1) 1110110101	false
28110	1	1101101011 (1) 1101111011	false
28111	1	1101101011 (1) 1101100011	false
28112	1	1101101011 (1) 1101101111	false
28113	1	1101101011 (1) 1101101001	false
28114	1	1000011111 (1) 1010011111	false
28115	1	1000011111 (1) 1001011111	false
28116	1	1000011111 (1) 1000001111	false
28117	1	1000011111 (1) 1000010111	false
28118	1	0000011111 (1) 0010011111	false
28119	1	0000011111 (1) 0001011111	false
28120	1	0000011111 (1) 0000001111	false
28121	1	0000011111 (1) 0000010111	false
28122	1	0010110111 (1) 0010110101	false
28123	1	1010110111 (1) 1010110101	false
28124	1	0100110111 (1) 0000110111	false
28125	1	0100110111 (1) 0110110111	false
28126	1	0100110111 (1) 0101110111	false
28127	1	0100110111 (1) 0100110101	false
28128	1	1100110111 (1) 1000110111	false
28129	1	1100110111 (1) 1110110111	false
28130	1	1100110111 (1) 1101110111	false
28131	1	1100110111 (1) 1100110101	false
28132	1	0000110111 (1) 0010110111	false
28133	1	0000110111 (1) 0001110111	false
28134	1	0000110111 (1) 0000110101	false
28135	1	1000110111 (1) 1010110111	false
28136	1	1000110111 (1) 1001110111	false
28137	1	1000110111 (1) 1000110101	false
28138	1	0111001111 (1) 0011001111	false
28139	1	0111001111 (1) 0101001111	false
28140	1	0111001111 (1) 0110001111	false
28141	1	0111001111 (1) 0111101111	false
28142	1	0111001111 (1) 0111000111	false
28143	1	1111001111 (1) 1101001111	false
28144	1	1111001111 (1) 1110001111	false
28145	1	1111001111 (1) 1111101111	false
28146	1	1111001111 (1) 1111000111	false
28147	1	1011001111 (1) 1111001111	false
28148	1	1011001111 (1) 1010001111	false
28149	1	1011001111 (1) 1011000111	false
28150	1	0011001111 (1) 0010001111	false
28151	1	0011001111 (1) 0011000111	false
28152	1	0101001111 (1) 0001001111	false
28153	1	0101001111 (1) 0101101111	false
28154	1	0101001111 (1) 0101000111	false
28155	1	1101001111 (1) 1101101111	false
28156	1	1101001111 (1) 1101000111	false
28157	1	0001001111 (1) 0011001111	false
28158	1	0001001111 (1) 0001000111	false
28159	1	0111110011 (1) 0011110011	false
28160	1	0111110011 (1) 0101110011	false
28161	1	0111110011 (1) 0110110011	false
28162	1	0111110011 (1) 0111110111	false
28163	1	0111110011 (1) 0111110001	false
28164	1	0111100111 (1) 0011100111	false
28165	1	0111100111 (1) 0110100111	false
28166	1	0111100111 (1) 0111110111	false
28167	1	0111100111 (1) 0111100101	false
28168	1	1001001111 (1) 1101001111	false
28169	1	1001001111 (1) 1011001111	false
28170	1	1001001111 (1) 1001000111	false
28171	1	1111110011 (1) 1011110011	false
28172	1	1111110011 (1) 1101110011	false
28173	1	1111110011 (1) 1110110011	false
28174	1	1111110011 (1) 1111110111	false
28175	1	1111110011 (1) 1111110001	false
28176	1	1111100111 (1) 1110100111	false
28177	1	1111100111 (1) 1111110111	false
28178	1	1111100111 (1) 1111100101	false
28179	1	1011110011 (1) 1010110011	false
28180	1	1011110011 (1) 1011010011	false
28181	1	1011110011 (1) 1011110111	false
28182	1	1011110011 (1) 1011110001	false
28183	1	1011100111 (1) 1111100111	false
28184	1	1011100111 (1) 1010100111	false
28185	1	1011100111 (1) 1011110111	false
28186	1	1011100111 (1) 1011100101	false
28187	1	0011110011 (1) 0010110011	false
28188	1	0011110011 (1) 0011010011	false
28189	1	0011110011 (1) 0011110111	false
28190	1	0011110011 (1) 0011110001	false
28191	1	0011100111 (1) 0010100111	false
28192	1	0011100111 (1) 0011110111	false
28193	1	0011100111 (1) 0011100101	false
28194	1	1011101110 (1) 1111101110	false
28195	1	1011101110 (1) 1010101110	false
28196	1	1011101110 (1) 1011001110	false
28197	1	1011101110 (1) 1011111110	false
28198	1	1011101110 (1) 1011100110	false
28199	1	1011101110 (1) 1011101010	false
28200	1	1011101110 (1) 1011101100	false
28201	1	0011101110 (1) 0010101110	false
28202	1	0011101110 (1) 0011001110	false
28203	1	0011101110 (1) 0011111110	false
28204	1	0011101110 (1) 0011100110	false
28205	1	0011101110 (1) 0011101010	false
28206	1	0011101110 (1) 0011101100	false
28207	1	0111111101 (1) 0011111101	false
28208	1	0111111101 (1) 0110111101	false
28209	1	1111111101 (1) 1011111101	false
28210	1	1111111101 (1) 1110111101	false
28211	1	0101110011 (1) 0001110011	false
28212	1	0101110011 (1) 0101110111	false
28213	1	0101110011 (1) 0101110001	false
28214	1	0101100111 (1) 0001100111	false
28215	1	0101100111 (1) 0111100111	false
28216	1	0101100111 (1) 0101110111	false
28217	1	0101100111 (1) 0101100101	false
28218	1	0110001111 (1) 0010001111	false
28219	1	0110001111 (1) 0100001111	false
28220	1	0110001111 (1) 0110000111	false
28221	1	1101110011 (1) 1001110011	false
28222	1	1101110011 (1) 1101110111	false
28223	1	1101110011 (1) 1101110001	false
28224	1	1101100111 (1) 1111100111	false
28225	1	1101100111 (1) 1101110111	false
28226	1	1101100111 (1) 1101100101	false
28227	1	0011111101 (1) 0010111101	false
28228	1	0011111101 (1) 0011011101	false
28229	1	1110001111 (1) 1100001111	false
28230	1	1110001111 (1) 1110000111	false
28231	1	1011111101 (1) 1010111101	false
28232	1	1011111101 (1) 1011011101	false
28233	1	1011100011 (1) 1111100011	false
28234	1	1011100011 (1) 1010100011	false
28235	1	1011100011 (1) 1011000011	false
28236	1	1011100011 (1) 1011110011	false
28237	1	1011100011 (1) 1011100111	false
28238	1	1011100011 (1) 1011100001	false
28239	1	1001110011 (1) 1011110011	false
28240	1	1001110011 (1) 1001010011	false
28241	1	1001110011 (1) 1001110111	false
28242	1	1001110011 (1) 1001110001	false
28243	1	1001100111 (1) 1101100111	false
28244	1	1001100111 (1) 1011100111	false
28245	1	1001100111 (1) 1001110111	false
28246	1	1001100111 (1) 1001100101	false
28247	1	0011100011 (1) 0010100011	false
28248	1	0011100011 (1) 0011000011	false
28249	1	0011100011 (1) 0011110011	false
28250	1	0011100011 (1) 0011100111	false
28251	1	0011100011 (1) 0011100001	false
28252	1	0001110011 (1) 0011110011	false
28253	1	0001110011 (1) 0001010011	false
28254	1	0001110011 (1) 0001110111	false
28255	1	0001110011 (1) 0001110001	false
28256	1	0001100111 (1) 0011100111	false
28257	1	0001100111 (1) 0001110111	false
28258	1	0001100111 (1) 0001100101	false
28259	1	1010001111 (1) 1110001111	false
28260	1	1010001111 (1) 1010000111	false
28261	1	0010001111 (1) 0010000111	false
28262	1	1111010111 (1) 1011010111	false
28263	1	1111010111 (1) 1101010111	false
28264	1	1111010111 (1) 1110010111	false
28265	1	1111010111 (1) 1111110111	false
28266	1	1111010111 (1) 1111000111	false
28267	1	0111010111 (1) 0011010111	false
28268	1	0111010111 (1) 0101010111	false
28269	1	0111010111 (1) 0110010111	false
28270	1	0111010111 (1) 0111110111	false
28271	1	0111010111 (1) 0111000111	false
28272	1	0011010111 (1) 0010010111	false
28273	1	0011010111 (1) 0011110111	false
28274	1	0011010111 (1) 0011000111	false
28275	1	0101111101 (1) 0001111101	false
28276	1	0101111101 (1) 0111111101	false
28277	1	1011010111 (1) 1010010111	false
28278	1	1011010111 (1) 1011110111	false
28279	1	1011010111 (1) 1011000111	false
28280	1	1101111101 (1) 1001111101	false
28281	1	1101111101 (1) 1111111101	false
28282	1	0001111101 (1) 0011111101	false
28283	1	0001111101 (1) 0001011101	false
28284	1	0100001111 (1) 0000001111	false
28285	1	0100001111 (1) 0101001111	false
28286	1	0100001111 (1) 0100000111	false
28287	1	1001111101 (1) 1011111101	false
28288	1	1001111101 (1) 1001011101	false
28289	1	1100001111 (1) 1101001111	false
28290	1	1100001111 (1) 1100000111	false
28291	1	0110110011 (1) 0010110011	false
28292	1	0110110011 (1) 0100110011	false
28293	1	0110110011 (1) 0110010011	false
28294	1	0110110011 (1) 0110110111	false
28295	1	0110110011 (1) 0110110001	false
28296	1	0110100111 (1) 0010100111	false
28297	1	0110100111 (1) 0110110111	false
28298	1	0110100111 (1) 0110100101	false
28299	1	0110100011 (1) 0010100011	false
28300	1	0110100011 (1) 0100100011	false
28301	1	0110100011 (1) 0110000011	false
28302	1	0110100011 (1) 0110110011	false
28303	1	0110100011 (1) 0110100111	false
28304	1	0110100011 (1) 0110100001	false
28305	1	1110110011 (1) 1010110011	false
28306	1	1110110011 (1) 1100110011	false
28307	1	1110110011 (1) 1110010011	false
28308	1	1110110011 (1) 1110110111	false
28309	1	1110110011 (1) 1110110001	false
28310	1	1110100111 (1) 1110110111	false
28311	1	1110100111 (1) 1110100101	false
28312	1	1000001111 (1) 1100001111	false
28313	1	1000001111 (1) 1010001111	false
28314	1	1000001111 (1) 1001001111	false
28315	1	1000001111 (1) 1000000111	false
28316	1	0000001111 (1) 0010001111	false
28317	1	0000001111 (1) 0001001111	false
28318	1	0000001111 (1) 0000000111	false
28319	1	0110101110 (1) 0010101110	false
28320	1	0110101110 (1) 0110001110	false
28321	1	0110101110 (1) 0110111110	false
28322	1	0110101110 (1) 0110100110	false
28323	1	0110101110 (1) 0110101010	false
28324	1	0110101110 (1) 0110101100	false
28325	1	0100101110 (1) 0000101110	false
28326	1	0100101110 (1) 0110101110	false
28327	1	0100101110 (1) 0101101110	false
28328	1	0100101110 (1) 0100001110	false
28329	1	0100101110 (1) 0100111110	false
28330	1	0100101110 (1) 0100100110	false
28331	1	0100101110 (1) 0100101010	false
28332	1	0100101110 (1) 0100101100	false
28333	1	1110101110 (1) 1110001110	false
28334	1	1110101110 (1) 1110111110	false
28335	1	1110101110 (1) 1110100110	false
28336	1	1110101110 (1) 1110101010	false
28337	1	1110101110 (1) 1110101100	false
28338	1	1110100011 (1) 1100100011	false
28339	1	1110100011 (1) 1110000011	false
28340	1	1110100011 (1) 1110110011	false
28341	1	1110100011 (1) 1110100111	false
28342	1	1110100011 (1) 1110100001	false
28343	1	1010110011 (1) 1010010011	false
28344	1	1010110011 (1) 1010110111	false
28345	1	1010110011 (1) 1010110001	false
28346	1	1010100111 (1) 1110100111	false
28347	1	1010100111 (1) 1010110111	false
28348	1	1010100111 (1) 1010100101	false
28349	1	0101010111 (1) 0001010111	false
28350	1	0101010111 (1) 0101110111	false
28351	1	0101010111 (1) 0101000111	false
28352	1	0010110011 (1) 0010010011	false
28353	1	0010110011 (1) 0010110111	false
28354	1	0010110011 (1) 0010110001	false
28355	1	0010100111 (1) 0010110111	false
28356	1	0010100111 (1) 0010100101	false
28357	1	1101010111 (1) 1001010111	false
28358	1	1101010111 (1) 1101110111	false
28359	1	1101010111 (1) 1101000111	false
28360	1	1100101110 (1) 1110101110	false
28361	1	1100101110 (1) 1101101110	false
28362	1	1100101110 (1) 1100001110	false
28363	1	1100101110 (1) 1100111110	false
28364	1	1100101110 (1) 1100100110	false
28365	1	1100101110 (1) 1100101010	false
28366	1	1100101110 (1) 1100101100	false
28367	1	1010101110 (1) 1110101110	false
28368	1	1010101110 (1) 1010001110	false
28369	1	1010101110 (1) 1010111110	false
28370	1	1010101110 (1) 1010100110	false
28371	1	1010101110 (1) 1010101010	false
28372	1	1010101110 (1) 1010101100	false
28373	1	1001101110 (1) 1101101110	false
28374	1	1001101110 (1) 1011101110	false
28375	1	1001101110 (1) 1001001110	false
28376	1	1001101110 (1) 1001111110	false
28377	1	1001101110 (1) 1001100110	false
28378	1	1001101110 (1) 1001101010	false
28379	1	1001101110 (1) 1001101100	false
28380	1	1000101110 (1) 1100101110	false
28381	1	1000101110 (1) 1010101110	false
28382	1	1000101110 (1) 1001101110	false
28383	1	1000101110 (1) 1000001110	false
28384	1	1000101110 (1) 1000111110	false
28385	1	1000101110 (1) 1000100110	false
28386	1	1000101110 (1) 1000101010	false
28387	1	1000101110 (1) 1000101100	false
28388	1	0010101110 (1) 0010001110	false
28389	1	0010101110 (1) 0010111110	false
28390	1	0010101110 (1) 0010100110	false
28391	1	0010101110 (1) 0010101010	false
28392	1	0010101110 (1) 0010101100	false
28393	1	0001101110 (1) 0011101110	false
28394	1	0001101110 (1) 0001001110	false
28395	1	0001101110 (1) 0001111110	false
28396	1	0001101110 (1) 0001100110	false
28397	1	0001101110 (1) 0001101010	false
28398	1	0001101110 (1) 0001101100	false
28399	1	0000101110 (1) 0010101110	false
28400	1	0000101110 (1) 0001101110	false
28401	1	0000101110 (1) 0000001110	false
28402	1	0000101110 (1) 0000111110	false
28403	1	0000101110 (1) 0000100110	false
28404	1	0000101110 (1) 0000101010	false
28405	1	0000101110 (1) 0000101100	false
28406	1	0001010111 (1) 0011010111	false
28407	1	0001010111 (1) 0001110111	false
28408	1	0001010111 (1) 0001000111	false
28409	1	1001010111 (1) 1011010111	false
28410	1	1001010111 (1) 1001110111	false
28411	1	1001010111 (1) 1001000111	false
28412	1	0110111101 (1) 0010111101	false
28413	1	0110111101 (1) 0110011101	false
28414	1	1110111101 (1) 1010111101	false
28415	1	1110111101 (1) 1110011101	false
28416	1	0111101110 (1) 0011101110	false
28417	1	0111101110 (1) 0110101110	false
28418	1	0111101110 (1) 0111111110	false
28419	1	0111101110 (1) 0111100110	false
28420	1	0111101110 (1) 0111101010	false
28421	1	0111101110 (1) 0111101100	false
28422	1	1111101110 (1) 1110101110	false
28423	1	1111101110 (1) 1111111110	false
28424	1	1111101110 (1) 1111100110	false
28425	1	1111101110 (1) 1111101010	false
28426	1	1111101110 (1) 1111101100	false
28427	1	0100110011 (1) 0000110011	false
28428	1	0100110011 (1) 0101110011	false
28429	1	0100110011 (1) 0100010011	false
28430	1	0100110011 (1) 0100110111	false
28431	1	0100110011 (1) 0100110001	false
28432	1	0100100111 (1) 0000100111	false
28433	1	0100100111 (1) 0110100111	false
28434	1	0100100111 (1) 0101100111	false
28435	1	0100100111 (1) 0100110111	false
28436	1	0100100111 (1) 0100100101	false
28437	1	0100100011 (1) 0000100011	false
28438	1	0100100011 (1) 0101100011	false
28439	1	0100100011 (1) 0100000011	false
28440	1	0100100011 (1) 0100110011	false
28441	1	0100100011 (1) 0100100111	false
28442	1	0100100011 (1) 0100100001	false
28443	1	0010111101 (1) 0010011101	false
28444	1	1100110011 (1) 1000110011	false
28445	1	1100110011 (1) 1101110011	false
28446	1	1100110011 (1) 1100010011	false
28447	1	1100110011 (1) 1100110111	false
28448	1	1100110011 (1) 1100110001	false
28449	1	1100100111 (1) 1110100111	false
28450	1	1100100111 (1) 1101100111	false
28451	1	1100100111 (1) 1100110111	false
28452	1	1100100111 (1) 1100100101	false
28453	1	1010111101 (1) 1010011101	false
28454	1	1100100011 (1) 1101100011	false
28455	1	1100100011 (1) 1100000011	false
28456	1	1100100011 (1) 1100110011	false
28457	1	1100100011 (1) 1100100111	false
28458	1	1100100011 (1) 1100100001	false
28459	1	1010100011 (1) 1110100011	false
28460	1	1010100011 (1) 1010000011	false
28461	1	1010100011 (1) 1010110011	false
28462	1	1010100011 (1) 1010100111	false
28463	1	1010100011 (1) 1010100001	false
28464	1	1001100011 (1) 1101100011	false
28465	1	1001100011 (1) 1011100011	false
28466	1	1001100011 (1) 1001000011	false
28467	1	1001100011 (1) 1001110011	false
28468	1	1001100011 (1) 1001100111	false
28469	1	1001100011 (1) 1001100001	false
28470	1	1000110011 (1) 1010110011	false
28471	1	1000110011 (1) 1001110011	false
28472	1	1000110011 (1) 1000010011	false
28473	1	1000110011 (1) 1000110111	false
28474	1	1000110011 (1) 1000110001	false
28475	1	1000100111 (1) 1100100111	false
28476	1	1000100111 (1) 1010100111	false
28477	1	1000100111 (1) 1001100111	false
28478	1	1000100111 (1) 1000110111	false
28479	1	1000100111 (1) 1000100101	false
28480	1	1000100011 (1) 1100100011	false
28481	1	1000100011 (1) 1010100011	false
28482	1	1000100011 (1) 1001100011	false
28483	1	1000100011 (1) 1000000011	false
28484	1	1000100011 (1) 1000110011	false
28485	1	1000100011 (1) 1000100111	false
28486	1	1000100011 (1) 1000100001	false
28487	1	0010100011 (1) 0010000011	false
28488	1	0010100011 (1) 0010110011	false
28489	1	0010100011 (1) 0010100111	false
28490	1	0010100011 (1) 0010100001	false
28491	1	0001100011 (1) 0011100011	false
28492	1	0001100011 (1) 0001000011	false
28493	1	0001100011 (1) 0001110011	false
28494	1	0001100011 (1) 0001100111	false
28495	1	0001100011 (1) 0001100001	false
28496	1	0000110011 (1) 0010110011	false
28497	1	0000110011 (1) 0001110011	false
28498	1	0000110011 (1) 0000010011	false
28499	1	0000110011 (1) 0000110111	false
28500	1	0000110011 (1) 0000110001	false
28501	1	0000100111 (1) 0010100111	false
28502	1	0000100111 (1) 0001100111	false
28503	1	0000100111 (1) 0000110111	false
28504	1	0000100111 (1) 0000100101	false
28505	1	0000100011 (1) 0010100011	false
28506	1	0000100011 (1) 0001100011	false
28507	1	0000100011 (1) 0000000011	false
28508	1	0000100011 (1) 0000110011	false
28509	1	0000100011 (1) 0000100111	false
28510	1	0000100011 (1) 0000100001	false
28511	1	0110010111 (1) 0010010111	false
28512	1	0110010111 (1) 0100010111	false
28513	1	0110010111 (1) 0110110111	false
28514	1	0110010111 (1) 0110000111	false
28515	1	1110010111 (1) 1010010111	false
28516	1	1110010111 (1) 1100010111	false
28517	1	1110010111 (1) 1110110111	false
28518	1	1110010111 (1) 1110000111	false
28519	1	1111100011 (1) 1101100011	false
28520	1	1111100011 (1) 1110100011	false
28521	1	1111100011 (1) 1111110011	false
28522	1	1111100011 (1) 1111100111	false
28523	1	1111100011 (1) 1111100001	false
28524	1	0010010111 (1) 0010110111	false
28525	1	0010010111 (1) 0010000111	false
28526	1	0100111101 (1) 0000111101	false
28527	1	0100111101 (1) 0110111101	false
28528	1	0100111101 (1) 0101111101	false
28529	1	0100111101 (1) 0100011101	false
28530	1	1100111101 (1) 1000111101	false
28531	1	1100111101 (1) 1110111101	false
28532	1	1100111101 (1) 1101111101	false
28533	1	1100111101 (1) 1100011101	false
28534	1	0111100011 (1) 0011100011	false
28535	1	0111100011 (1) 0101100011	false
28536	1	0111100011 (1) 0110100011	false
28537	1	0111100011 (1) 0111110011	false
28538	1	0111100011 (1) 0111100111	false
28539	1	0111100011 (1) 0111100001	false
28540	1	0101101110 (1) 0001101110	false
28541	1	0101101110 (1) 0111101110	false
28542	1	0101101110 (1) 0101111110	false
28543	1	0101101110 (1) 0101100110	false
28544	1	0101101110 (1) 0101101010	false
28545	1	0101101110 (1) 0101101100	false
28546	1	1101101110 (1) 1111101110	false
28547	1	1101101110 (1) 1101111110	false
28548	1	1101101110 (1) 1101100110	false
28549	1	1101101110 (1) 1101101010	false
28550	1	1101101110 (1) 1101101100	false
28551	1	1010010111 (1) 1010110111	false
28552	1	1010010111 (1) 1010000111	false
28553	1	0000111101 (1) 0010111101	false
28554	1	0000111101 (1) 0001111101	false
28555	1	0000111101 (1) 0000011101	false
28556	1	1000111101 (1) 1010111101	false
28557	1	1000111101 (1) 1001111101	false
28558	1	1000111101 (1) 1000011101	false
28559	1	1111011101 (1) 1011011101	false
28560	1	1111011101 (1) 1101011101	false
28561	1	1111011101 (1) 1110011101	false
28562	1	1111011101 (1) 1111111101	false
28563	1	1111011101 (1) 1111001101	false
28564	1	1111011101 (1) 1111011111	false
28565	1	1111011011 (1) 1011011011	false
28566	1	1111011011 (1) 1101011011	false
28567	1	1111011011 (1) 1110011011	false
28568	1	1111011011 (1) 1111111011	false
28569	1	1111011011 (1) 1111001011	false
28570	1	1111011011 (1) 1111010011	false
28571	1	1111011011 (1) 1111011111	false
28572	1	0111011101 (1) 0011011101	false
28573	1	0111011101 (1) 0101011101	false
28574	1	0111011101 (1) 0110011101	false
28575	1	0111011101 (1) 0111111101	false
28576	1	0111011101 (1) 0111001101	false
28577	1	0111011101 (1) 0111011111	false
28578	1	0111011011 (1) 0011011011	false
28579	1	0111011011 (1) 0101011011	false
28580	1	0111011011 (1) 0110011011	false
28581	1	0111011011 (1) 0111111011	false
28582	1	0111011011 (1) 0111001011	false
28583	1	0111011011 (1) 0111010011	false
28584	1	0111011011 (1) 0111011111	false
28585	1	0100010111 (1) 0000010111	false
28586	1	0100010111 (1) 0101010111	false
28587	1	0100010111 (1) 0100110111	false
28588	1	0100010111 (1) 0100000111	false
28589	1	1100010111 (1) 1000010111	false
28590	1	1100010111 (1) 1101010111	false
28591	1	1100010111 (1) 1100110111	false
28592	1	1100010111 (1) 1100000111	false
28593	1	1101100011 (1) 1101110011	false
28594	1	1101100011 (1) 1101100111	false
28595	1	1101100011 (1) 1101100001	false
28596	1	1011011101 (1) 1010011101	false
28597	1	1011011101 (1) 1011001101	false
28598	1	1011011101 (1) 1011011111	false
28599	1	1011011011 (1) 1001011011	false
28600	1	1011011011 (1) 1010011011	false
28601	1	1011011011 (1) 1011001011	false
28602	1	1011011011 (1) 1011010011	false
28603	1	1011011011 (1) 1011011111	false
28604	1	0101100011 (1) 0001100011	false
28605	1	0101100011 (1) 0101110011	false
28606	1	0101100011 (1) 0101100111	false
28607	1	0101100011 (1) 0101100001	false
28608	1	0000010111 (1) 0010010111	false
28609	1	0000010111 (1) 0001010111	false
28610	1	0000010111 (1) 0000110111	false
28611	1	0000010111 (1) 0000000111	false
28612	1	0011011101 (1) 0010011101	false
28613	1	0011011101 (1) 0011001101	false
28614	1	0011011101 (1) 0011011111	false
28615	1	0011011011 (1) 0001011011	false
28616	1	0011011011 (1) 0010011011	false
28617	1	0011011011 (1) 0011001011	false
28618	1	0011011011 (1) 0011010011	false
28619	1	0011011011 (1) 0011011111	false
28620	1	1000010111 (1) 1010010111	false
28621	1	1000010111 (1) 1001010111	false
28622	1	1000010111 (1) 1000110111	false
28623	1	1000010111 (1) 1000000111	false
28624	1	0111111110 (1) 0011111110	false
28625	1	0111111110 (1) 0110111110	false
28626	1	0111111110 (1) 0111110110	false
28627	1	0111111110 (1) 0111111100	false
28628	1	1111111110 (1) 1011111110	false
28629	1	1111111110 (1) 1110111110	false
28630	1	1111111110 (1) 1111110110	false
28631	1	1111111110 (1) 1111111100	false
28632	1	0011111110 (1) 0010111110	false
28633	1	0011111110 (1) 0011011110	false
28634	1	0011111110 (1) 0011110110	false
28635	1	0011111110 (1) 0011111100	false
28636	1	1011111110 (1) 1010111110	false
28637	1	1011111110 (1) 1011011110	false
28638	1	1011111110 (1) 1011110110	false
28639	1	1011111110 (1) 1011111100	false
28640	1	0101011101 (1) 0001011101	false
28641	1	0101011101 (1) 0101111101	false
28642	1	0101011101 (1) 0101001101	false
28643	1	0101011101 (1) 0101011111	false
28644	1	0101011011 (1) 0001011011	false
28645	1	0101011011 (1) 0101111011	false
28646	1	0101011011 (1) 0101001011	false
28647	1	0101011011 (1) 0101010011	false
28648	1	0101011011 (1) 0101011111	false
28649	1	1101011101 (1) 1001011101	false
28650	1	1101011101 (1) 1101111101	false
28651	1	1101011101 (1) 1101001101	false
28652	1	1101011101 (1) 1101011111	false
28653	1	1101011011 (1) 1001011011	false
28654	1	1101011011 (1) 1101111011	false
28655	1	1101011011 (1) 1101001011	false
28656	1	1101011011 (1) 1101010011	false
28657	1	1101011011 (1) 1101011111	false
28658	1	0001011101 (1) 0011011101	false
28659	1	0001011101 (1) 0001001101	false
28660	1	0001011101 (1) 0001011111	false
28661	1	0001011011 (1) 0001001011	false
28662	1	0001011011 (1) 0001010011	false
28663	1	0001011011 (1) 0001011111	false
28664	1	1001011101 (1) 1011011101	false
28665	1	1001011101 (1) 1001001101	false
28666	1	1001011101 (1) 1001011111	false
28667	1	1001011011 (1) 1001001011	false
28668	1	1001011011 (1) 1001010011	false
28669	1	1001011011 (1) 1001011111	false
28670	1	0101111110 (1) 0001111110	false
28671	1	0101111110 (1) 0111111110	false
28672	1	0101111110 (1) 0101110110	false
28673	1	0101111110 (1) 0101111100	false
28674	1	1101111110 (1) 1001111110	false
28675	1	1101111110 (1) 1111111110	false
28676	1	1101111110 (1) 1101110110	false
28677	1	1101111110 (1) 1101111100	false
28678	1	0001111110 (1) 0011111110	false
28679	1	0001111110 (1) 0001011110	false
28680	1	0001111110 (1) 0001110110	false
28681	1	0001111110 (1) 0001111100	false
28682	1	1001111110 (1) 1011111110	false
28683	1	1001111110 (1) 1001011110	false
28684	1	1001111110 (1) 1001110110	false
28685	1	1001111110 (1) 1001111100	false
28686	1	0111101101 (1) 0011101101	false
28687	1	0111101101 (1) 0110101101	false
28688	1	0111101101 (1) 0111111101	false
28689	1	0111101101 (1) 0111100101	false
28690	1	0110011101 (1) 0010011101	false
28691	1	0110011101 (1) 0100011101	false
28692	1	0110011101 (1) 0110001101	false
28693	1	0110011101 (1) 0110011111	false
28694	1	0110011011 (1) 0010011011	false
28695	1	0110011011 (1) 0100011011	false
28696	1	0110011011 (1) 0110001011	false
28697	1	0110011011 (1) 0110010011	false
28698	1	0110011011 (1) 0110011111	false
28699	1	1111101101 (1) 1110101101	false
28700	1	1111101101 (1) 1111111101	false
28701	1	1111101101 (1) 1111100101	false
28702	1	1110011101 (1) 1010011101	false
28703	1	1110011101 (1) 1100011101	false
28704	1	1110011101 (1) 1110001101	false
28705	1	1110011101 (1) 1110011111	false
28706	1	1110011011 (1) 1010011011	false
28707	1	1110011011 (1) 1100011011	false
28708	1	1110011011 (1) 1110001011	false
28709	1	1110011011 (1) 1110010011	false
28710	1	1110011011 (1) 1110011111	false
28711	1	1011101101 (1) 1111101101	false
28712	1	1011101101 (1) 1010101101	false
28713	1	1011101101 (1) 1011001101	false
28714	1	1011101101 (1) 1011111101	false
28715	1	1011101101 (1) 1011100101	false
28716	1	0010011101 (1) 0010001101	false
28717	1	0010011101 (1) 0010011111	false
28718	1	0010011011 (1) 0000011011	false
28719	1	0010011011 (1) 0010001011	false
28720	1	0010011011 (1) 0010010011	false
28721	1	0010011011 (1) 0010011111	false
28722	1	0011101101 (1) 0010101101	false
28723	1	0011101101 (1) 0011001101	false
28724	1	0011101101 (1) 0011111101	false
28725	1	0011101101 (1) 0011100101	false
28726	1	1010011101 (1) 1010001101	false
28727	1	1010011101 (1) 1010011111	false
28728	1	1010011011 (1) 1000011011	false
28729	1	1010011011 (1) 1010001011	false
28730	1	1010011011 (1) 1010010011	false
28731	1	1010011011 (1) 1010011111	false
28732	1	1110111110 (1) 1010111110	false
28733	1	1110111110 (1) 1110011110	false
28734	1	1110111110 (1) 1110110110	false
28735	1	1110111110 (1) 1110111100	false
28736	1	0110111110 (1) 0010111110	false
28737	1	0110111110 (1) 0110011110	false
28738	1	0110111110 (1) 0110110110	false
28739	1	0110111110 (1) 0110111100	false
28740	1	0010111110 (1) 0010011110	false
28741	1	0010111110 (1) 0010110110	false
28742	1	0010111110 (1) 0010111100	false
28743	1	1010111110 (1) 1010011110	false
28744	1	1010111110 (1) 1010110110	false
28745	1	1010111110 (1) 1010111100	false
28746	1	0111000111 (1) 0011000111	false
28747	1	0111000111 (1) 0101000111	false
28748	1	0111000111 (1) 0110000111	false
28749	1	0111000111 (1) 0111100111	false
28750	1	1111000111 (1) 1101000111	false
28751	1	1111000111 (1) 1110000111	false
28752	1	1111000111 (1) 1111100111	false
28753	1	0100011101 (1) 0000011101	false
28754	1	0100011101 (1) 0101011101	false
28755	1	0100011101 (1) 0100001101	false
28756	1	0100011101 (1) 0100011111	false
28757	1	0100011011 (1) 0000011011	false
28758	1	0100011011 (1) 0101011011	false
28759	1	0100011011 (1) 0100001011	false
28760	1	0100011011 (1) 0100010011	false
28761	1	0100011011 (1) 0100011111	false
28762	1	0101101101 (1) 0001101101	false
28763	1	0101101101 (1) 0111101101	false
28764	1	0101101101 (1) 0101111101	false
28765	1	0101101101 (1) 0101100101	false
28766	1	1101101101 (1) 1111101101	false
28767	1	1101101101 (1) 1101111101	false
28768	1	1101101101 (1) 1101100101	false
28769	1	1011000111 (1) 1111000111	false
28770	1	1011000111 (1) 1010000111	false
28771	1	1011000111 (1) 1011100111	false
28772	1	0011000111 (1) 0010000111	false
28773	1	0011000111 (1) 0011100111	false
28774	1	1111110110 (1) 1011110110	false
28775	1	1111110110 (1) 1110110110	false
28776	1	1111110110 (1) 1111110010	false
28777	1	1111110110 (1) 1111110100	false
28778	1	0111110110 (1) 0011110110	false
28779	1	0111110110 (1) 0110110110	false
28780	1	0111110110 (1) 0111110010	false
28781	1	0111110110 (1) 0111110100	false
28782	1	1100011101 (1) 1000011101	false
28783	1	1100011101 (1) 1101011101	false
28784	1	1100011101 (1) 1100001101	false
28785	1	1100011101 (1) 1100011111	false
28786	1	1100011011 (1) 1000011011	false
28787	1	1100011011 (1) 1101011011	false
28788	1	1100011011 (1) 1100001011	false
28789	1	1100011011 (1) 1100010011	false
28790	1	1100011011 (1) 1100011111	false
28791	1	1011101001 (1) 1111101001	false
28792	1	1011101001 (1) 1010101001	false
28793	1	1011101001 (1) 1011001001	false
28794	1	1011101001 (1) 1011111001	false
28795	1	1011101001 (1) 1011100001	false
28796	1	1011101001 (1) 1011101101	false
28797	1	1001101101 (1) 1101101101	false
28798	1	1001101101 (1) 1011101101	false
28799	1	1001101101 (1) 1001001101	false
28800	1	1001101101 (1) 1001111101	false
28801	1	1001101101 (1) 1001100101	false
28802	1	0000011101 (1) 0010011101	false
28803	1	0000011101 (1) 0001011101	false
28804	1	0000011101 (1) 0000001101	false
28805	1	0000011101 (1) 0000011111	false
28806	1	0000011011 (1) 0001011011	false
28807	1	0000011011 (1) 0000001011	false
28808	1	0000011011 (1) 0000010011	false
28809	1	0000011011 (1) 0000011111	false
28810	1	1000011101 (1) 1010011101	false
28811	1	1000011101 (1) 1001011101	false
28812	1	1000011101 (1) 1000001101	false
28813	1	1000011101 (1) 1000011111	false
28814	1	1000011011 (1) 1001011011	false
28815	1	1000011011 (1) 1000001011	false
28816	1	1000011011 (1) 1000010011	false
28817	1	1000011011 (1) 1000011111	false
28818	1	0011101001 (1) 0010101001	false
28819	1	0011101001 (1) 0011001001	false
28820	1	0011101001 (1) 0011111001	false
28821	1	0011101001 (1) 0011100001	false
28822	1	0011101001 (1) 0011101101	false
28823	1	0001101101 (1) 0011101101	false
28824	1	0001101101 (1) 0001001101	false
28825	1	0001101101 (1) 0001111101	false
28826	1	0001101101 (1) 0001100101	false
28827	1	0100111110 (1) 0000111110	false
28828	1	0100111110 (1) 0110111110	false
28829	1	0100111110 (1) 0101111110	false
28830	1	0100111110 (1) 0100011110	false
28831	1	0100111110 (1) 0100110110	false
28832	1	0100111110 (1) 0100111100	false
28833	1	0011110110 (1) 0010110110	false
28834	1	0011110110 (1) 0011110010	false
28835	1	0011110110 (1) 0011110100	false
28836	1	1100111110 (1) 1000111110	false
28837	1	1100111110 (1) 1110111110	false
28838	1	1100111110 (1) 1101111110	false
28839	1	1100111110 (1) 1100011110	false
28840	1	1100111110 (1) 1100110110	false
28841	1	1100111110 (1) 1100111100	false
28842	1	1011110110 (1) 1010110110	false
28843	1	1011110110 (1) 1011110010	false
28844	1	1011110110 (1) 1011110100	false
28845	1	0000111110 (1) 0010111110	false
28846	1	0000111110 (1) 0001111110	false
28847	1	0000111110 (1) 0000011110	false
28848	1	0000111110 (1) 0000110110	false
28849	1	0000111110 (1) 0000111100	false
28850	1	1000111110 (1) 1010111110	false
28851	1	1000111110 (1) 1001111110	false
28852	1	1000111110 (1) 1000011110	false
28853	1	1000111110 (1) 1000110110	false
28854	1	1000111110 (1) 1000111100	false
28855	1	0101000111 (1) 0001000111	false
28856	1	0101000111 (1) 0101100111	false
28857	1	1101000111 (1) 1101100111	false
28858	1	0101110110 (1) 0001110110	false
28859	1	0101110110 (1) 0111110110	false
28860	1	0101110110 (1) 0101110010	false
28861	1	0101110110 (1) 0101110100	false
28862	1	1001000111 (1) 1101000111	false
28863	1	1001000111 (1) 1011000111	false
28864	1	1001000111 (1) 1001100111	false
28865	1	1101110110 (1) 1001110110	false
28866	1	1101110110 (1) 1111110110	false
28867	1	1101110110 (1) 1101110010	false
28868	1	1101110110 (1) 1101110100	false
28869	1	0001000111 (1) 0011000111	false
28870	1	0001000111 (1) 0001100111	false
28871	1	0110101101 (1) 0010101101	false
28872	1	0110101101 (1) 0110001101	false
28873	1	0110101101 (1) 0110111101	false
28874	1	0110101101 (1) 0110100101	false
28875	1	0110101001 (1) 0010101001	false
28876	1	0110101001 (1) 0100101001	false
28877	1	0110101001 (1) 0110001001	false
28878	1	0110101001 (1) 0110111001	false
28879	1	0110101001 (1) 0110100001	false
28880	1	0110101001 (1) 0110101101	false
28881	1	1110101101 (1) 1110001101	false
28882	1	1110101101 (1) 1110111101	false
28883	1	1110101101 (1) 1110100101	false
28884	1	0001110110 (1) 0011110110	false
28885	1	0001110110 (1) 0001110010	false
28886	1	0001110110 (1) 0001110100	false
28887	1	1001110110 (1) 1011110110	false
28888	1	1001110110 (1) 1001110010	false
28889	1	1001110110 (1) 1001110100	false
28890	1	1110101001 (1) 1100101001	false
28891	1	1110101001 (1) 1110001001	false
28892	1	1110101001 (1) 1110111001	false
28893	1	1110101001 (1) 1110100001	false
28894	1	1110101001 (1) 1110101101	false
28895	1	1010101101 (1) 1110101101	false
28896	1	1010101101 (1) 1010001101	false
28897	1	1010101101 (1) 1010111101	false
28898	1	1010101101 (1) 1010100101	false
28899	1	0010101101 (1) 0010001101	false
28900	1	0010101101 (1) 0010111101	false
28901	1	0010101101 (1) 0010100101	false
28902	1	0111111001 (1) 0011111001	false
28903	1	0111111001 (1) 0101111001	false
28904	1	0111111001 (1) 0110111001	false
28905	1	0111111001 (1) 0111111101	false
28906	1	0111110101 (1) 0011110101	false
28907	1	0111110101 (1) 0110110101	false
28908	1	0111110101 (1) 0111111101	false
28909	1	1111111001 (1) 1011111001	false
28910	1	1111111001 (1) 1101111001	false
28911	1	1111111001 (1) 1110111001	false
28912	1	1111111001 (1) 1111111101	false
28913	1	1111110101 (1) 1011110101	false
28914	1	1111110101 (1) 1110110101	false
28915	1	1111110101 (1) 1111111101	false
28916	1	0011111001 (1) 0010111001	false
28917	1	0011111001 (1) 0011011001	false
28918	1	0011111001 (1) 0011111101	false
28919	1	0011110101 (1) 0010110101	false
28920	1	0011110101 (1) 0011111101	false
28921	1	0110000111 (1) 0010000111	false
28922	1	0110000111 (1) 0100000111	false
28923	1	0110000111 (1) 0110100111	false
28924	1	1011111001 (1) 1010111001	false
28925	1	1011111001 (1) 1011011001	false
28926	1	1011111001 (1) 1011111101	false
28927	1	1011110101 (1) 1010110101	false
28928	1	1011110101 (1) 1011111101	false
28929	1	1110000111 (1) 1100000111	false
28930	1	1110000111 (1) 1110100111	false
28931	1	0100101101 (1) 0000101101	false
28932	1	0100101101 (1) 0110101101	false
28933	1	0100101101 (1) 0101101101	false
28934	1	0100101101 (1) 0100001101	false
28935	1	0100101101 (1) 0100111101	false
28936	1	0100101101 (1) 0100100101	false
28937	1	0100101001 (1) 0000101001	false
28938	1	0100101001 (1) 0101101001	false
28939	1	0100101001 (1) 0100001001	false
28940	1	0100101001 (1) 0100111001	false
28941	1	0100101001 (1) 0100100001	false
28942	1	0100101001 (1) 0100101101	false
28943	1	1100101101 (1) 1110101101	false
28944	1	1100101101 (1) 1101101101	false
28945	1	1100101101 (1) 1100001101	false
28946	1	1100101101 (1) 1100111101	false
28947	1	1100101101 (1) 1100100101	false
28948	1	1010000111 (1) 1110000111	false
28949	1	1010000111 (1) 1010100111	false
28950	1	0010000111 (1) 0010100111	false
28951	1	0110110110 (1) 0010110110	false
28952	1	0110110110 (1) 0110110010	false
28953	1	0110110110 (1) 0110110100	false
28954	1	1110110110 (1) 1010110110	false
28955	1	1110110110 (1) 1110110010	false
28956	1	1110110110 (1) 1110110100	false
28957	1	1100101001 (1) 1101101001	false
28958	1	1100101001 (1) 1100001001	false
28959	1	1100101001 (1) 1100111001	false
28960	1	1100101001 (1) 1100100001	false
28961	1	1100101001 (1) 1100101101	false
28962	1	1010101001 (1) 1110101001	false
28963	1	1010101001 (1) 1010001001	false
28964	1	1010101001 (1) 1010111001	false
28965	1	1010101001 (1) 1010100001	false
28966	1	1010101001 (1) 1010101101	false
28967	1	1001101001 (1) 1101101001	false
28968	1	1001101001 (1) 1011101001	false
28969	1	1001101001 (1) 1001001001	false
28970	1	1001101001 (1) 1001111001	false
28971	1	1001101001 (1) 1001100001	false
28972	1	1001101001 (1) 1001101101	false
28973	1	1000101101 (1) 1100101101	false
28974	1	1000101101 (1) 1010101101	false
28975	1	1000101101 (1) 1001101101	false
28976	1	1000101101 (1) 1000001101	false
28977	1	1000101101 (1) 1000111101	false
28978	1	1000101101 (1) 1000100101	false
28979	1	1000101001 (1) 1100101001	false
28980	1	1000101001 (1) 1010101001	false
28981	1	1000101001 (1) 1001101001	false
28982	1	1000101001 (1) 1000001001	false
28983	1	1000101001 (1) 1000111001	false
28984	1	1000101001 (1) 1000100001	false
28985	1	1000101001 (1) 1000101101	false
28986	1	0010101001 (1) 0010001001	false
28987	1	0010101001 (1) 0010111001	false
28988	1	0010101001 (1) 0010100001	false
28989	1	0010101001 (1) 0010101101	false
28990	1	0001101001 (1) 0011101001	false
28991	1	0001101001 (1) 0001001001	false
28992	1	0001101001 (1) 0001111001	false
28993	1	0001101001 (1) 0001100001	false
28994	1	0001101001 (1) 0001101101	false
28995	1	0000101101 (1) 0010101101	false
28996	1	0000101101 (1) 0001101101	false
28997	1	0000101101 (1) 0000001101	false
28998	1	0000101101 (1) 0000111101	false
28999	1	0000101101 (1) 0000100101	false
29000	1	0000101001 (1) 0010101001	false
29001	1	0000101001 (1) 0001101001	false
29002	1	0000101001 (1) 0000001001	false
29003	1	0000101001 (1) 0000111001	false
29004	1	0000101001 (1) 0000100001	false
29005	1	0000101001 (1) 0000101101	false
29006	1	0010110110 (1) 0010110010	false
29007	1	0010110110 (1) 0010110100	false
29008	1	1010110110 (1) 1010110010	false
29009	1	1010110110 (1) 1010110100	false
29010	1	0101111001 (1) 0001111001	false
29011	1	0101111001 (1) 0101111101	false
29012	1	0101110101 (1) 0001110101	false
29013	1	0101110101 (1) 0111110101	false
29014	1	0101110101 (1) 0101111101	false
29015	1	1101111001 (1) 1001111001	false
29016	1	1101111001 (1) 1101111101	false
29017	1	1101110101 (1) 1001110101	false
29018	1	1101110101 (1) 1111110101	false
29019	1	1101110101 (1) 1101111101	false
29020	1	0111101001 (1) 0011101001	false
29021	1	0111101001 (1) 0101101001	false
29022	1	0111101001 (1) 0110101001	false
29023	1	0111101001 (1) 0111111001	false
29024	1	0111101001 (1) 0111100001	false
29025	1	0111101001 (1) 0111101101	false
29026	1	0111001101 (1) 0011001101	false
29027	1	0111001101 (1) 0101001101	false
29028	1	0111001101 (1) 0110001101	false
29029	1	0111001101 (1) 0111101101	false
29030	1	0111001101 (1) 0111000101	false
29031	1	0111001101 (1) 0111001111	false
29032	1	0111001011 (1) 0011001011	false
29033	1	0111001011 (1) 0101001011	false
29034	1	0111001011 (1) 0110001011	false
29035	1	0111001011 (1) 0111101011	false
29036	1	0111001011 (1) 0111000011	false
29037	1	0111001011 (1) 0111001111	false
29038	1	0111001001 (1) 0011001001	false
29039	1	0111001001 (1) 0101001001	false
29040	1	0111001001 (1) 0110001001	false
29041	1	0111001001 (1) 0111101001	false
29042	1	0111001001 (1) 0111000001	false
29043	1	0111001001 (1) 0111001101	false
29044	1	0111001001 (1) 0111001011	false
29045	1	0001111001 (1) 0011111001	false
29046	1	0001111001 (1) 0001011001	false
29047	1	0001111001 (1) 0001111101	false
29048	1	0001110101 (1) 0011110101	false
29049	1	0001110101 (1) 0001111101	false
29050	1	0100000111 (1) 0000000111	false
29051	1	0100000111 (1) 0101000111	false
29052	1	0100000111 (1) 0100100111	false
29053	1	1111101001 (1) 1101101001	false
29054	1	1111101001 (1) 1110101001	false
29055	1	1111101001 (1) 1111111001	false
29056	1	1111101001 (1) 1111100001	false
29057	1	1111101001 (1) 1111101101	false
29058	1	1111001101 (1) 1101001101	false
29059	1	1111001101 (1) 1110001101	false
29060	1	1111001101 (1) 1111101101	false
29061	1	1111001101 (1) 1111000101	false
29062	1	1111001101 (1) 1111001111	false
29063	1	1111001011 (1) 1101001011	false
29064	1	1111001011 (1) 1110001011	false
29065	1	1111001011 (1) 1111101011	false
29066	1	1111001011 (1) 1111000011	false
29067	1	1111001011 (1) 1111001111	false
29068	1	1001111001 (1) 1011111001	false
29069	1	1001111001 (1) 1001011001	false
29070	1	1001111001 (1) 1001111101	false
29071	1	1001110101 (1) 1011110101	false
29072	1	1001110101 (1) 1001111101	false
29073	1	1100000111 (1) 1101000111	false
29074	1	1100000111 (1) 1100100111	false
29075	1	0011001101 (1) 0010001101	false
29076	1	0011001101 (1) 0011000101	false
29077	1	0011001101 (1) 0011001111	false
29078	1	0011001011 (1) 0001001011	false
29079	1	0011001011 (1) 0010001011	false
29080	1	0011001011 (1) 0011000011	false
29081	1	0011001011 (1) 0011001111	false
29082	1	0011001001 (1) 0001001001	false
29083	1	0011001001 (1) 0010001001	false
29084	1	0011001001 (1) 0011000001	false
29085	1	0011001001 (1) 0011001101	false
29086	1	0011001001 (1) 0011001011	false
29087	1	0100110110 (1) 0000110110	false
29088	1	0100110110 (1) 0110110110	false
29089	1	0100110110 (1) 0101110110	false
29090	1	0100110110 (1) 0100110010	false
29091	1	0100110110 (1) 0100110100	false
29092	1	0000000111 (1) 0010000111	false
29093	1	0000000111 (1) 0001000111	false
29094	1	0000000111 (1) 0000100111	false
29095	1	1111001001 (1) 1101001001	false
29096	1	1111001001 (1) 1110001001	false
29097	1	1111001001 (1) 1111101001	false
29098	1	1111001001 (1) 1111000001	false
29099	1	1111001001 (1) 1111001101	false
29100	1	1111001001 (1) 1111001011	false
29101	1	1011001101 (1) 1111001101	false
29102	1	1011001101 (1) 1010001101	false
29103	1	1011001101 (1) 1011000101	false
29104	1	1011001101 (1) 1011001111	false
29105	1	1011001011 (1) 1111001011	false
29106	1	1011001011 (1) 1001001011	false
29107	1	1011001011 (1) 1010001011	false
29108	1	1011001011 (1) 1011000011	false
29109	1	1011001011 (1) 1011001111	false
29110	1	1011001001 (1) 1111001001	false
29111	1	1011001001 (1) 1001001001	false
29112	1	1011001001 (1) 1010001001	false
29113	1	1011001001 (1) 1011000001	false
29114	1	1011001001 (1) 1011001101	false
29115	1	1011001001 (1) 1011001011	false
29116	1	0111111010 (1) 0011111010	false
29117	1	0111111010 (1) 0101111010	false
29118	1	0111111010 (1) 0110111010	false
29119	1	0111111010 (1) 0111110010	false
29120	1	0111111010 (1) 0111111110	false
29121	1	0111111010 (1) 0111111000	false
29122	1	1000000111 (1) 1100000111	false
29123	1	1000000111 (1) 1010000111	false
29124	1	1000000111 (1) 1001000111	false
29125	1	1000000111 (1) 1000100111	false
29126	1	1111111010 (1) 1011111010	false
29127	1	1111111010 (1) 1101111010	false
29128	1	1111111010 (1) 1110111010	false
29129	1	1111111010 (1) 1111110010	false
29130	1	1111111010 (1) 1111111110	false
29131	1	1111111010 (1) 1111111000	false
29132	1	1100110110 (1) 1000110110	false
29133	1	1100110110 (1) 1110110110	false
29134	1	1100110110 (1) 1101110110	false
29135	1	1100110110 (1) 1100110010	false
29136	1	1100110110 (1) 1100110100	false
29137	1	1011111010 (1) 1010111010	false
29138	1	1011111010 (1) 1011011010	false
29139	1	1011111010 (1) 1011110010	false
29140	1	1011111010 (1) 1011111110	false
29141	1	1011111010 (1) 1011111000	false
29142	1	0011111010 (1) 0010111010	false
29143	1	0011111010 (1) 0011011010	false
29144	1	0011111010 (1) 0011110010	false
29145	1	0011111010 (1) 0011111110	false
29146	1	0011111010 (1) 0011111000	false
29147	1	0000110110 (1) 0010110110	false
29148	1	0000110110 (1) 0001110110	false
29149	1	0000110110 (1) 0000110010	false
29150	1	0000110110 (1) 0000110100	false
29151	1	1000110110 (1) 1010110110	false
29152	1	1000110110 (1) 1001110110	false
29153	1	1000110110 (1) 1000110010	false
29154	1	1000110110 (1) 1000110100	false
29155	1	0110111001 (1) 0010111001	false
29156	1	0110111001 (1) 0100111001	false
29157	1	0110111001 (1) 0110011001	false
29158	1	0110111001 (1) 0110111101	false
29159	1	0110110101 (1) 0010110101	false
29160	1	0110110101 (1) 0110111101	false
29161	1	0101101001 (1) 0001101001	false
29162	1	0101101001 (1) 0101111001	false
29163	1	0101101001 (1) 0101100001	false
29164	1	0101101001 (1) 0101101101	false
29165	1	0101001101 (1) 0001001101	false
29166	1	0101001101 (1) 0101101101	false
29167	1	0101001101 (1) 0101000101	false
29168	1	0101001101 (1) 0101001111	false
29169	1	0101001011 (1) 0001001011	false
29170	1	0101001011 (1) 0101101011	false
29171	1	0101001011 (1) 0101000011	false
29172	1	0101001011 (1) 0101001111	false
29173	1	1110111001 (1) 1010111001	false
29174	1	1110111001 (1) 1100111001	false
29175	1	1110111001 (1) 1110011001	false
29176	1	1110111001 (1) 1110111101	false
29177	1	1110110101 (1) 1010110101	false
29178	1	1110110101 (1) 1110111101	false
29179	1	1101101001 (1) 1101111001	false
29180	1	1101101001 (1) 1101100001	false
29181	1	1101101001 (1) 1101101101	false
29182	1	1101001101 (1) 1101101101	false
29183	1	1101001101 (1) 1101000101	false
29184	1	1101001101 (1) 1101001111	false
29185	1	1101001011 (1) 1101101011	false
29186	1	1101001011 (1) 1101000011	false
29187	1	1101001011 (1) 1101001111	false
29188	1	0111100110 (1) 0011100110	false
29189	1	0111100110 (1) 0110100110	false
29190	1	0111100110 (1) 0111110110	false
29191	1	0111100110 (1) 0111100010	false
29192	1	0111100110 (1) 0111100100	false
29193	1	1111100110 (1) 1110100110	false
29194	1	1111100110 (1) 1111110110	false
29195	1	1111100110 (1) 1111100010	false
29196	1	1111100110 (1) 1111100100	false
29197	1	0101111010 (1) 0001111010	false
29198	1	0101111010 (1) 0101110010	false
29199	1	0101111010 (1) 0101111110	false
29200	1	0101111010 (1) 0101111000	false
29201	1	0001001101 (1) 0011001101	false
29202	1	0001001101 (1) 0001000101	false
29203	1	0001001101 (1) 0001001111	false
29204	1	0001001011 (1) 0001000011	false
29205	1	0001001011 (1) 0001001111	false
29206	1	0011100110 (1) 0010100110	false
29207	1	0011100110 (1) 0011110110	false
29208	1	0011100110 (1) 0011100010	false
29209	1	0011100110 (1) 0011100100	false
29210	1	1001001101 (1) 1101001101	false
29211	1	1001001101 (1) 1011001101	false
29212	1	1001001101 (1) 1001000101	false
29213	1	1001001101 (1) 1001001111	false
29214	1	1001001011 (1) 1101001011	false
29215	1	1001001011 (1) 1001000011	false
29216	1	1001001011 (1) 1001001111	false
29217	1	0010111001 (1) 0010011001	false
29218	1	0010111001 (1) 0010111101	false
29219	1	0010110101 (1) 0010111101	false
29220	1	1011100110 (1) 1111100110	false
29221	1	1011100110 (1) 1010100110	false
29222	1	1011100110 (1) 1011110110	false
29223	1	1011100110 (1) 1011100010	false
29224	1	1011100110 (1) 1011100100	false
29225	1	1010111001 (1) 1010011001	false
29226	1	1010111001 (1) 1010111101	false
29227	1	1010110101 (1) 1010111101	false
29228	1	1101111010 (1) 1001111010	false
29229	1	1101111010 (1) 1101110010	false
29230	1	1101111010 (1) 1101111110	false
29231	1	1101111010 (1) 1101111000	false
29232	1	1011101010 (1) 1111101010	false
29233	1	1011101010 (1) 1010101010	false
29234	1	1011101010 (1) 1011001010	false
29235	1	1011101010 (1) 1011111010	false
29236	1	1011101010 (1) 1011100010	false
29237	1	1011101010 (1) 1011101000	false
29238	1	1001111010 (1) 1011111010	false
29239	1	1001111010 (1) 1001011010	false
29240	1	1001111010 (1) 1001110010	false
29241	1	1001111010 (1) 1001111110	false
29242	1	1001111010 (1) 1001111000	false
29243	1	0011101010 (1) 0010101010	false
29244	1	0011101010 (1) 0011001010	false
29245	1	0011101010 (1) 0011111010	false
29246	1	0011101010 (1) 0011100010	false
29247	1	0011101010 (1) 0011101000	false
29248	1	0001111010 (1) 0011111010	false
29249	1	0001111010 (1) 0001011010	false
29250	1	0001111010 (1) 0001110010	false
29251	1	0001111010 (1) 0001111110	false
29252	1	0001111010 (1) 0001111000	false
29253	1	1111011110 (1) 1011011110	false
29254	1	1111011110 (1) 1101011110	false
29255	1	1111011110 (1) 1110011110	false
29256	1	1111011110 (1) 1111111110	false
29257	1	1111011110 (1) 1111001110	false
29258	1	1111011110 (1) 1111010110	false
29259	1	0111011110 (1) 0011011110	false
29260	1	0111011110 (1) 0101011110	false
29261	1	0111011110 (1) 0110011110	false
29262	1	0111011110 (1) 0111111110	false
29263	1	0111011110 (1) 0111001110	false
29264	1	0111011110 (1) 0111010110	false
29265	1	0100111001 (1) 0000111001	false
29266	1	0100111001 (1) 0101111001	false
29267	1	0100111001 (1) 0100011001	false
29268	1	0100111001 (1) 0100111101	false
29269	1	0100110101 (1) 0000110101	false
29270	1	0100110101 (1) 0110110101	false
29271	1	0100110101 (1) 0101110101	false
29272	1	0100110101 (1) 0100111101	false
29273	1	1100111001 (1) 1000111001	false
29274	1	1100111001 (1) 1101111001	false
29275	1	1100111001 (1) 1100011001	false
29276	1	1100111001 (1) 1100111101	false
29277	1	1100110101 (1) 1000110101	false
29278	1	1100110101 (1) 1110110101	false
29279	1	1100110101 (1) 1101110101	false
29280	1	1100110101 (1) 1100111101	false
29281	1	0101100110 (1) 0001100110	false
29282	1	0101100110 (1) 0111100110	false
29283	1	0101100110 (1) 0101110110	false
29284	1	0101100110 (1) 0101100010	false
29285	1	0101100110 (1) 0101100100	false
29286	1	0011011110 (1) 0010011110	false
29287	1	0011011110 (1) 0011001110	false
29288	1	0011011110 (1) 0011010110	false
29289	1	1101100110 (1) 1111100110	false
29290	1	1101100110 (1) 1101110110	false
29291	1	1101100110 (1) 1101100010	false
29292	1	1101100110 (1) 1101100100	false
29293	1	1011011110 (1) 1010011110	false
29294	1	1011011110 (1) 1011001110	false
29295	1	1011011110 (1) 1011010110	false
29296	1	0000111001 (1) 0010111001	false
29297	1	0000111001 (1) 0001111001	false
29298	1	0000111001 (1) 0000011001	false
29299	1	0000111001 (1) 0000111101	false
29300	1	0000110101 (1) 0010110101	false
29301	1	0000110101 (1) 0001110101	false
29302	1	0000110101 (1) 0000111101	false
29303	1	0110001101 (1) 0010001101	false
29304	1	0110001101 (1) 0100001101	false
29305	1	0110001101 (1) 0110000101	false
29306	1	0110001101 (1) 0110001111	false
29307	1	0110001011 (1) 0010001011	false
29308	1	0110001011 (1) 0100001011	false
29309	1	0110001011 (1) 0110000011	false
29310	1	0110001011 (1) 0110001111	false
29311	1	0110001001 (1) 0010001001	false
29312	1	0110001001 (1) 0100001001	false
29313	1	0110001001 (1) 0110000001	false
29314	1	0110001001 (1) 0110001101	false
29315	1	0110001001 (1) 0110001011	false
29316	1	1000111001 (1) 1010111001	false
29317	1	1000111001 (1) 1001111001	false
29318	1	1000111001 (1) 1000011001	false
29319	1	1000111001 (1) 1000111101	false
29320	1	1000110101 (1) 1010110101	false
29321	1	1000110101 (1) 1001110101	false
29322	1	1000110101 (1) 1000111101	false
29323	1	1110001101 (1) 1100001101	false
29324	1	1110001101 (1) 1110000101	false
29325	1	1110001101 (1) 1110001111	false
29326	1	1110001011 (1) 1100001011	false
29327	1	1110001011 (1) 1110000011	false
29328	1	1110001011 (1) 1110001111	false
29329	1	0001100110 (1) 0011100110	false
29330	1	0001100110 (1) 0001110110	false
29331	1	0001100110 (1) 0001100010	false
29332	1	0001100110 (1) 0001100100	false
29333	1	1001100110 (1) 1101100110	false
29334	1	1001100110 (1) 1011100110	false
29335	1	1001100110 (1) 1001110110	false
29336	1	1001100110 (1) 1001100010	false
29337	1	1001100110 (1) 1001100100	false
29338	1	0010001101 (1) 0010000101	false
29339	1	0010001101 (1) 0010001111	false
29340	1	0010001011 (1) 0000001011	false
29341	1	0010001011 (1) 0010000011	false
29342	1	0010001011 (1) 0010001111	false
29343	1	0010001001 (1) 0000001001	false
29344	1	0010001001 (1) 0010000001	false
29345	1	0010001001 (1) 0010001101	false
29346	1	0010001001 (1) 0010001011	false
29347	1	1110001001 (1) 1100001001	false
29348	1	1110001001 (1) 1110000001	false
29349	1	1110001001 (1) 1110001101	false
29350	1	1110001001 (1) 1110001011	false
29351	1	1010001101 (1) 1110001101	false
29352	1	1010001101 (1) 1010000101	false
29353	1	1010001101 (1) 1010001111	false
29354	1	1010001011 (1) 1110001011	false
29355	1	1010001011 (1) 1000001011	false
29356	1	1010001011 (1) 1010000011	false
29357	1	1010001011 (1) 1010001111	false
29358	1	1010001001 (1) 1110001001	false
29359	1	1010001001 (1) 1000001001	false
29360	1	1010001001 (1) 1010000001	false
29361	1	1010001001 (1) 1010001101	false
29362	1	1010001001 (1) 1010001011	false
29363	1	0110111010 (1) 0010111010	false
29364	1	0110111010 (1) 0100111010	false
29365	1	0110111010 (1) 0110011010	false
29366	1	0110111010 (1) 0110110010	false
29367	1	0110111010 (1) 0110111110	false
29368	1	0110111010 (1) 0110111000	false
29369	1	0110101010 (1) 0010101010	false
29370	1	0110101010 (1) 0100101010	false
29371	1	0110101010 (1) 0110001010	false
29372	1	0110101010 (1) 0110111010	false
29373	1	0110101010 (1) 0110100010	false
29374	1	0110101010 (1) 0110101000	false
29375	1	1110111010 (1) 1010111010	false
29376	1	1110111010 (1) 1100111010	false
29377	1	1110111010 (1) 1110011010	false
29378	1	1110111010 (1) 1110110010	false
29379	1	1110111010 (1) 1110111110	false
29380	1	1110111010 (1) 1110111000	false
29381	1	1111011001 (1) 1011011001	false
29382	1	1111011001 (1) 1101011001	false
29383	1	1111011001 (1) 1110011001	false
29384	1	1111011001 (1) 1111111001	false
29385	1	1111011001 (1) 1111001001	false
29386	1	1111011001 (1) 1111011101	false
29387	1	1111011001 (1) 1111011011	false
29388	1	1111010101 (1) 1011010101	false
29389	1	1111010101 (1) 1101010101	false
29390	1	1111010101 (1) 1110010101	false
29391	1	1111010101 (1) 1111110101	false
29392	1	1111010101 (1) 1111000101	false
29393	1	1111010101 (1) 1111011101	false
29394	1	1111010101 (1) 1111010111	false
29395	1	1111010011 (1) 1011010011	false
29396	1	1111010011 (1) 1101010011	false
29397	1	1111010011 (1) 1110010011	false
29398	1	1111010011 (1) 1111110011	false
29399	1	1111010011 (1) 1111000011	false
29400	1	1111010011 (1) 1111010111	false
29401	1	1111010001 (1) 1011010001	false
29402	1	1111010001 (1) 1101010001	false
29403	1	1111010001 (1) 1110010001	false
29404	1	1111010001 (1) 1111110001	false
29405	1	1111010001 (1) 1111000001	false
29406	1	1111010001 (1) 1111011001	false
29407	1	1111010001 (1) 1111010101	false
29408	1	1111010001 (1) 1111010011	false
29409	1	0111011001 (1) 0011011001	false
29410	1	0111011001 (1) 0101011001	false
29411	1	0111011001 (1) 0110011001	false
29412	1	0111011001 (1) 0111111001	false
29413	1	0111011001 (1) 0111001001	false
29414	1	0111011001 (1) 0111011101	false
29415	1	0111011001 (1) 0111011011	false
29416	1	0111010101 (1) 0011010101	false
29417	1	0111010101 (1) 0101010101	false
29418	1	0111010101 (1) 0110010101	false
29419	1	0111010101 (1) 0111110101	false
29420	1	0111010101 (1) 0111000101	false
29421	1	0111010101 (1) 0111011101	false
29422	1	0111010101 (1) 0111010111	false
29423	1	0111010011 (1) 0011010011	false
29424	1	0111010011 (1) 0101010011	false
29425	1	0111010011 (1) 0110010011	false
29426	1	0111010011 (1) 0111110011	false
29427	1	0111010011 (1) 0111000011	false
29428	1	0111010011 (1) 0111010111	false
29429	1	0111010001 (1) 0011010001	false
29430	1	0111010001 (1) 0101010001	false
29431	1	0111010001 (1) 0110010001	false
29432	1	0111010001 (1) 0111110001	false
29433	1	0111010001 (1) 0111000001	false
29434	1	0111010001 (1) 0111011001	false
29435	1	0111010001 (1) 0111010101	false
29436	1	0111010001 (1) 0111010011	false
29437	1	1110101010 (1) 1100101010	false
29438	1	1110101010 (1) 1110001010	false
29439	1	1110101010 (1) 1110111010	false
29440	1	1110101010 (1) 1110100010	false
29441	1	1110101010 (1) 1110101000	false
29442	1	1010111010 (1) 1010011010	false
29443	1	1010111010 (1) 1010110010	false
29444	1	1010111010 (1) 1010111110	false
29445	1	1010111010 (1) 1010111000	false
29446	1	0101011110 (1) 0001011110	false
29447	1	0101011110 (1) 0101111110	false
29448	1	0101011110 (1) 0101001110	false
29449	1	0101011110 (1) 0101010110	false
29450	1	0010111010 (1) 0010011010	false
29451	1	0010111010 (1) 0010110010	false
29452	1	0010111010 (1) 0010111110	false
29453	1	0010111010 (1) 0010111000	false
29454	1	1101011110 (1) 1001011110	false
29455	1	1101011110 (1) 1101111110	false
29456	1	1101011110 (1) 1101001110	false
29457	1	1101011110 (1) 1101010110	false
29458	1	0011011001 (1) 0001011001	false
29459	1	0011011001 (1) 0010011001	false
29460	1	0011011001 (1) 0011001001	false
29461	1	0011011001 (1) 0011011101	false
29462	1	0011011001 (1) 0011011011	false
29463	1	0011010101 (1) 0010010101	false
29464	1	0011010101 (1) 0011110101	false
29465	1	0011010101 (1) 0011000101	false
29466	1	0011010101 (1) 0011011101	false
29467	1	0011010101 (1) 0011010111	false
29468	1	0011010011 (1) 0001010011	false
29469	1	0011010011 (1) 0010010011	false
29470	1	0011010011 (1) 0011000011	false
29471	1	0011010011 (1) 0011010111	false
29472	1	0011010001 (1) 0001010001	false
29473	1	0011010001 (1) 0010010001	false
29474	1	0011010001 (1) 0011000001	false
29475	1	0011010001 (1) 0011011001	false
29476	1	0011010001 (1) 0011010101	false
29477	1	0011010001 (1) 0011010011	false
29478	1	1011011001 (1) 1001011001	false
29479	1	1011011001 (1) 1010011001	false
29480	1	1011011001 (1) 1011001001	false
29481	1	1011011001 (1) 1011011101	false
29482	1	1011011001 (1) 1011011011	false
29483	1	1011010101 (1) 1010010101	false
29484	1	1011010101 (1) 1011110101	false
29485	1	1011010101 (1) 1011000101	false
29486	1	1011010101 (1) 1011011101	false
29487	1	1011010101 (1) 1011010111	false
29488	1	1011010011 (1) 1001010011	false
29489	1	1011010011 (1) 1010010011	false
29490	1	1011010011 (1) 1011000011	false
29491	1	1011010011 (1) 1011010111	false
29492	1	1011010001 (1) 1001010001	false
29493	1	1011010001 (1) 1010010001	false
29494	1	1011010001 (1) 1011000001	false
29495	1	1011010001 (1) 1011011001	false
29496	1	1011010001 (1) 1011010101	false
29497	1	1011010001 (1) 1011010011	false
29498	1	0001011110 (1) 0011011110	false
29499	1	0001011110 (1) 0001001110	false
29500	1	0001011110 (1) 0001010110	false
29501	1	1001011110 (1) 1011011110	false
29502	1	1001011110 (1) 1001001110	false
29503	1	1001011110 (1) 1001010110	false
29504	1	0101001001 (1) 0001001001	false
29505	1	0101001001 (1) 0101101001	false
29506	1	0101001001 (1) 0101000001	false
29507	1	0101001001 (1) 0101001101	false
29508	1	0101001001 (1) 0101001011	false
29509	1	0100001101 (1) 0000001101	false
29510	1	0100001101 (1) 0101001101	false
29511	1	0100001101 (1) 0100000101	false
29512	1	0100001101 (1) 0100001111	false
29513	1	0100001011 (1) 0000001011	false
29514	1	0100001011 (1) 0101001011	false
29515	1	0100001011 (1) 0100000011	false
29516	1	0100001011 (1) 0100001111	false
29517	1	0100001001 (1) 0000001001	false
29518	1	0100001001 (1) 0101001001	false
29519	1	0100001001 (1) 0100000001	false
29520	1	0100001001 (1) 0100001101	false
29521	1	0100001001 (1) 0100001011	false
29522	1	1101001001 (1) 1101101001	false
29523	1	1101001001 (1) 1101000001	false
29524	1	1101001001 (1) 1101001101	false
29525	1	1101001001 (1) 1101001011	false
29526	1	1100001101 (1) 1101001101	false
29527	1	1100001101 (1) 1100000101	false
29528	1	1100001101 (1) 1100001111	false
29529	1	1100001011 (1) 1101001011	false
29530	1	1100001011 (1) 1100000011	false
29531	1	1100001011 (1) 1100001111	false
29532	1	0110100110 (1) 0010100110	false
29533	1	0110100110 (1) 0110110110	false
29534	1	0110100110 (1) 0110100010	false
29535	1	0110100110 (1) 0110100100	false
29536	1	1110100110 (1) 1110110110	false
29537	1	1110100110 (1) 1110100010	false
29538	1	1110100110 (1) 1110100100	false
29539	1	0001001001 (1) 0001000001	false
29540	1	0001001001 (1) 0001001101	false
29541	1	0001001001 (1) 0001001011	false
29542	1	0000001101 (1) 0010001101	false
29543	1	0000001101 (1) 0001001101	false
29544	1	0000001101 (1) 0000000101	false
29545	1	0000001101 (1) 0000001111	false
29546	1	0000001011 (1) 0001001011	false
29547	1	0000001011 (1) 0000000011	false
29548	1	0000001011 (1) 0000001111	false
29549	1	0000001001 (1) 0001001001	false
29550	1	0000001001 (1) 0000000001	false
29551	1	0000001001 (1) 0000001101	false
29552	1	0000001001 (1) 0000001011	false
29553	1	1100001001 (1) 1101001001	false
29554	1	1100001001 (1) 1100000001	false
29555	1	1100001001 (1) 1100001101	false
29556	1	1100001001 (1) 1100001011	false
29557	1	1001001001 (1) 1101001001	false
29558	1	1001001001 (1) 1001000001	false
29559	1	1001001001 (1) 1001001101	false
29560	1	1001001001 (1) 1001001011	false
29561	1	1000001101 (1) 1100001101	false
29562	1	1000001101 (1) 1010001101	false
29563	1	1000001101 (1) 1001001101	false
29564	1	1000001101 (1) 1000000101	false
29565	1	1000001101 (1) 1000001111	false
29566	1	1000001011 (1) 1100001011	false
29567	1	1000001011 (1) 1001001011	false
29568	1	1000001011 (1) 1000000011	false
29569	1	1000001011 (1) 1000001111	false
29570	1	1000001001 (1) 1100001001	false
29571	1	1000001001 (1) 1001001001	false
29572	1	1000001001 (1) 1000000001	false
29573	1	1000001001 (1) 1000001101	false
29574	1	1000001001 (1) 1000001011	false
29575	1	0100111010 (1) 0000111010	false
29576	1	0100111010 (1) 0101111010	false
29577	1	0100111010 (1) 0100011010	false
29578	1	0100111010 (1) 0100110010	false
29579	1	0100111010 (1) 0100111110	false
29580	1	0100111010 (1) 0100111000	false
29581	1	0100101010 (1) 0000101010	false
29582	1	0100101010 (1) 0101101010	false
29583	1	0100101010 (1) 0100001010	false
29584	1	0100101010 (1) 0100111010	false
29585	1	0100101010 (1) 0100100010	false
29586	1	0100101010 (1) 0100101000	false
29587	1	0010100110 (1) 0010110110	false
29588	1	0010100110 (1) 0010100010	false
29589	1	0010100110 (1) 0010100100	false
29590	1	1100111010 (1) 1000111010	false
29591	1	1100111010 (1) 1101111010	false
29592	1	1100111010 (1) 1100011010	false
29593	1	1100111010 (1) 1100110010	false
29594	1	1100111010 (1) 1100111110	false
29595	1	1100111010 (1) 1100111000	false
29596	1	1010100110 (1) 1110100110	false
29597	1	1010100110 (1) 1010110110	false
29598	1	1010100110 (1) 1010100010	false
29599	1	1010100110 (1) 1010100100	false
29600	1	0101011001 (1) 0001011001	false
29601	1	0101011001 (1) 0101111001	false
29602	1	0101011001 (1) 0101001001	false
29603	1	0101011001 (1) 0101011101	false
29604	1	0101011001 (1) 0101011011	false
29605	1	0101010101 (1) 0001010101	false
29606	1	0101010101 (1) 0101110101	false
29607	1	0101010101 (1) 0101000101	false
29608	1	0101010101 (1) 0101011101	false
29609	1	0101010101 (1) 0101010111	false
29610	1	0101010011 (1) 0001010011	false
29611	1	0101010011 (1) 0101110011	false
29612	1	0101010011 (1) 0101000011	false
29613	1	0101010011 (1) 0101010111	false
29614	1	1101011001 (1) 1001011001	false
29615	1	1101011001 (1) 1101111001	false
29616	1	1101011001 (1) 1101001001	false
29617	1	1101011001 (1) 1101011101	false
29618	1	1101011001 (1) 1101011011	false
29619	1	1101010101 (1) 1001010101	false
29620	1	1101010101 (1) 1101110101	false
29621	1	1101010101 (1) 1101000101	false
29622	1	1101010101 (1) 1101011101	false
29623	1	1101010101 (1) 1101010111	false
29624	1	1101010011 (1) 1001010011	false
29625	1	1101010011 (1) 1101110011	false
29626	1	1101010011 (1) 1101000011	false
29627	1	1101010011 (1) 1101010111	false
29628	1	1100101010 (1) 1101101010	false
29629	1	1100101010 (1) 1100001010	false
29630	1	1100101010 (1) 1100111010	false
29631	1	1100101010 (1) 1100100010	false
29632	1	1100101010 (1) 1100101000	false
29633	1	1010101010 (1) 1110101010	false
29634	1	1010101010 (1) 1010001010	false
29635	1	1010101010 (1) 1010111010	false
29636	1	1010101010 (1) 1010100010	false
29637	1	1010101010 (1) 1010101000	false
29638	1	1001101010 (1) 1101101010	false
29639	1	1001101010 (1) 1011101010	false
29640	1	1001101010 (1) 1001001010	false
29641	1	1001101010 (1) 1001111010	false
29642	1	1001101010 (1) 1001100010	false
29643	1	1001101010 (1) 1001101000	false
29644	1	1000111010 (1) 1010111010	false
29645	1	1000111010 (1) 1001111010	false
29646	1	1000111010 (1) 1000011010	false
29647	1	1000111010 (1) 1000110010	false
29648	1	1000111010 (1) 1000111110	false
29649	1	1000111010 (1) 1000111000	false
29650	1	1000101010 (1) 1100101010	false
29651	1	1000101010 (1) 1010101010	false
29652	1	1000101010 (1) 1001101010	false
29653	1	1000101010 (1) 1000001010	false
29654	1	1000101010 (1) 1000111010	false
29655	1	1000101010 (1) 1000100010	false
29656	1	1000101010 (1) 1000101000	false
29657	1	0010101010 (1) 0010001010	false
29658	1	0010101010 (1) 0010111010	false
29659	1	0010101010 (1) 0010100010	false
29660	1	0010101010 (1) 0010101000	false
29661	1	0001101010 (1) 0011101010	false
29662	1	0001101010 (1) 0001001010	false
29663	1	0001101010 (1) 0001111010	false
29664	1	0001101010 (1) 0001100010	false
29665	1	0001101010 (1) 0001101000	false
29666	1	0000111010 (1) 0010111010	false
29667	1	0000111010 (1) 0001111010	false
29668	1	0000111010 (1) 0000011010	false
29669	1	0000111010 (1) 0000110010	false
29670	1	0000111010 (1) 0000111110	false
29671	1	0000111010 (1) 0000111000	false
29672	1	0000101010 (1) 0010101010	false
29673	1	0000101010 (1) 0001101010	false
29674	1	0000101010 (1) 0000001010	false
29675	1	0000101010 (1) 0000111010	false
29676	1	0000101010 (1) 0000100010	false
29677	1	0000101010 (1) 0000101000	false
29678	1	0001011001 (1) 0001001001	false
29679	1	0001011001 (1) 0001011101	false
29680	1	0001011001 (1) 0001011011	false
29681	1	0001010101 (1) 0011010101	false
29682	1	0001010101 (1) 0001110101	false
29683	1	0001010101 (1) 0001000101	false
29684	1	0001010101 (1) 0001011101	false
29685	1	0001010101 (1) 0001010111	false
29686	1	0001010011 (1) 0001000011	false
29687	1	0001010011 (1) 0001010111	false
29688	1	1001011001 (1) 1001001001	false
29689	1	1001011001 (1) 1001011101	false
29690	1	1001011001 (1) 1001011011	false
29691	1	1001010101 (1) 1011010101	false
29692	1	1001010101 (1) 1001110101	false
29693	1	1001010101 (1) 1001000101	false
29694	1	1001010101 (1) 1001011101	false
29695	1	1001010101 (1) 1001010111	false
29696	1	1001010011 (1) 1001000011	false
29697	1	1001010011 (1) 1001010111	false
[truncated: 2,100 more rows]
