# Supplementary material
Source: publisher figshare collection journal article supplement (https://springernature.figshare.com/ndownloader/files/17562821)
Supplement: Supplementary file 1 [file 17562821 › CytoscapeSession-2018_09_25-21_15/tables/26668-STG%2C+Model+2/LOCAL_ATTRS-org.cytoscape.model.CyNode-STG%2C+Model+2+default++node.cytable]

CyCSV-Version	1
SUID	name	selected
java.lang.Long	java.lang.String	java.lang.Boolean
STG, Model 2 default node
26678	0111111111	false
26679	1111111111	false
26680	0011111111	false
26681	1011111111	false
26682	0101111111	false
26683	1101111111	false
26684	0001111111	false
26685	1001111111	false
26686	0110111111	false
26687	1110111111	false
26688	0010111111	false
26689	1010111111	false
26690	0100111111	false
26691	1100111111	false
26692	0000111111	false
26693	1000111111	false
26694	0111111011	false
26695	0111101111	false
26696	1111111011	false
26697	1111101111	false
26698	1011111011	false
26699	1011101111	false
26700	0011111011	false
26701	0011101111	false
26702	0101111011	false
26703	0101101111	false
26704	1101111011	false
26705	1101101111	false
26706	1011101011	false
26707	1001111011	false
26708	1001101111	false
26709	0011101011	false
26710	0001111011	false
26711	0001101111	false
26712	1111011111	false
26713	0111011111	false
26714	1011011111	false
26715	0011011111	false
26716	0110111011	false
26717	0110101111	false
26718	0110101011	false
26719	1110111011	false
26720	1110101111	false
26721	1110101011	false
26722	1010111011	false
26723	1010101111	false
26724	0010111011	false
26725	0010101111	false
26726	0101011111	false
26727	1101011111	false
26728	0111110111	false
26729	1111110111	false
26730	1001011111	false
26731	0001011111	false
26732	0011110111	false
26733	1011110111	false
26734	0100111011	false
26735	0100101111	false
26736	0100101011	false
26737	1100111011	false
26738	1100101111	false
26739	1100101011	false
26740	1010101011	false
26741	1001101011	false
26742	1000111011	false
26743	1000101111	false
26744	1000101011	false
26745	0010101011	false
26746	0001101011	false
26747	0000111011	false
26748	0000101111	false
26749	0000101011	false
26750	0101110111	false
26751	0110011111	false
26752	1101110111	false
26753	1110011111	false
26754	0001110111	false
26755	0111101011	false
26756	1111101011	false
26757	1001110111	false
26758	1010011111	false
26759	0010011111	false
26760	0100011111	false
26761	1100011111	false
26762	0101101011	false
26763	0110110111	false
26764	1110110111	false
26765	1101101011	false
26766	1000011111	false
26767	0000011111	false
26768	0010110111	false
26769	1010110111	false
26770	0100110111	false
26771	1100110111	false
26772	0000110111	false
26773	1000110111	false
26774	0111001111	false
26775	1111001111	false
26776	1011001111	false
26777	0011001111	false
26778	0101001111	false
26779	1101001111	false
26780	0001001111	false
26781	0111110011	false
26782	0111100111	false
26783	1001001111	false
26784	1111110011	false
26785	1111100111	false
26786	1011110011	false
26787	1011100111	false
26788	0011110011	false
26789	0011100111	false
26790	1011101110	false
26791	0011101110	false
26792	0111111101	false
26793	1111111101	false
26794	0101110011	false
26795	0101100111	false
26796	0110001111	false
26797	1101110011	false
26798	1101100111	false
26799	0011111101	false
26800	1110001111	false
26801	1011111101	false
26802	1011100011	false
26803	1001110011	false
26804	1001100111	false
26805	0011100011	false
26806	0001110011	false
26807	0001100111	false
26808	1010001111	false
26809	0010001111	false
26810	1111010111	false
26811	0111010111	false
26812	0011010111	false
26813	0101111101	false
26814	1011010111	false
26815	1101111101	false
26816	0001111101	false
26817	0100001111	false
26818	1001111101	false
26819	1100001111	false
26820	0110110011	false
26821	0110100111	false
26822	0110100011	false
26823	1110110011	false
26824	1110100111	false
26825	1000001111	false
26826	0000001111	false
26827	0110101110	false
26828	0100101110	false
26829	1110101110	false
26830	1110100011	false
26831	1010110011	false
26832	1010100111	false
26833	0101010111	false
26834	0010110011	false
26835	0010100111	false
26836	1101010111	false
26837	1100101110	false
26838	1010101110	false
26839	1001101110	false
26840	1000101110	false
26841	0010101110	false
26842	0001101110	false
26843	0000101110	false
26844	0001010111	false
26845	1001010111	false
26846	0110111101	false
26847	1110111101	false
26848	0111101110	false
26849	1111101110	false
26850	0100110011	false
26851	0100100111	false
26852	0100100011	false
26853	0010111101	false
26854	1100110011	false
26855	1100100111	false
26856	1010111101	false
26857	1100100011	false
26858	1010100011	false
26859	1001100011	false
26860	1000110011	false
26861	1000100111	false
26862	1000100011	false
26863	0010100011	false
26864	0001100011	false
26865	0000110011	false
26866	0000100111	false
26867	0000100011	false
26868	0110010111	false
26869	1110010111	false
26870	1111100011	false
26871	0010010111	false
26872	0100111101	false
26873	1100111101	false
26874	0111100011	false
26875	0101101110	false
26876	1101101110	false
26877	1010010111	false
26878	0000111101	false
26879	1000111101	false
26880	1111011101	false
26881	1111011011	false
26882	0111011101	false
26883	0111011011	false
26884	0100010111	false
26885	1100010111	false
26886	1101100011	false
26887	1011011101	false
26888	1011011011	false
26889	0101100011	false
26890	0000010111	false
26891	0011011101	false
26892	0011011011	false
26893	1000010111	false
26894	0111111110	false
26895	1111111110	false
26896	0011111110	false
26897	1011111110	false
26898	0101011101	false
26899	0101011011	false
26900	1101011101	false
26901	1101011011	false
26902	0001011101	false
26903	0001011011	false
26904	1001011101	false
26905	1001011011	false
26906	0101111110	false
26907	1101111110	false
26908	0001111110	false
26909	1001111110	false
26910	0111101101	false
26911	0110011101	false
26912	0110011011	false
26913	1111101101	false
26914	1110011101	false
26915	1110011011	false
26916	1011101101	false
26917	0010011101	false
26918	0010011011	false
26919	0011101101	false
26920	1010011101	false
26921	1010011011	false
26922	1110111110	false
26923	0110111110	false
26924	0010111110	false
26925	1010111110	false
26926	0111000111	false
26927	1111000111	false
26928	0100011101	false
26929	0100011011	false
26930	0101101101	false
26931	1101101101	false
26932	1011000111	false
26933	0011000111	false
26934	1111110110	false
26935	0111110110	false
26936	1100011101	false
26937	1100011011	false
26938	1011101001	false
26939	1001101101	false
26940	0000011101	false
26941	0000011011	false
26942	1000011101	false
26943	1000011011	false
26944	0011101001	false
26945	0001101101	false
26946	0100111110	false
26947	0011110110	false
26948	1100111110	false
26949	1011110110	false
26950	0000111110	false
26951	1000111110	false
26952	0101000111	false
26953	1101000111	false
26954	0101110110	false
26955	1001000111	false
26956	1101110110	false
26957	0001000111	false
26958	0110101101	false
26959	0110101001	false
26960	1110101101	false
26961	0001110110	false
26962	1001110110	false
26963	1110101001	false
26964	1010101101	false
26965	0010101101	false
26966	0111111001	false
26967	0111110101	false
26968	1111111001	false
26969	1111110101	false
26970	0011111001	false
26971	0011110101	false
26972	0110000111	false
26973	1011111001	false
26974	1011110101	false
26975	1110000111	false
26976	0100101101	false
26977	0100101001	false
26978	1100101101	false
26979	1010000111	false
26980	0010000111	false
26981	0110110110	false
26982	1110110110	false
26983	1100101001	false
26984	1010101001	false
26985	1001101001	false
26986	1000101101	false
26987	1000101001	false
26988	0010101001	false
26989	0001101001	false
26990	0000101101	false
26991	0000101001	false
26992	0010110110	false
26993	1010110110	false
26994	0101111001	false
26995	0101110101	false
26996	1101111001	false
26997	1101110101	false
26998	0111101001	false
26999	0111001101	false
27000	0111001011	false
27001	0111001001	false
27002	0001111001	false
27003	0001110101	false
27004	0100000111	false
27005	1111101001	false
27006	1111001101	false
27007	1111001011	false
27008	1001111001	false
27009	1001110101	false
27010	1100000111	false
27011	0011001101	false
27012	0011001011	false
27013	0011001001	false
27014	0100110110	false
27015	0000000111	false
27016	1111001001	false
27017	1011001101	false
27018	1011001011	false
27019	1011001001	false
27020	0111111010	false
27021	1000000111	false
27022	1111111010	false
27023	1100110110	false
27024	1011111010	false
27025	0011111010	false
27026	0000110110	false
27027	1000110110	false
27028	0110111001	false
27029	0110110101	false
27030	0101101001	false
27031	0101001101	false
27032	0101001011	false
27033	1110111001	false
27034	1110110101	false
27035	1101101001	false
27036	1101001101	false
27037	1101001011	false
27038	0111100110	false
27039	1111100110	false
27040	0101111010	false
27041	0001001101	false
27042	0001001011	false
27043	0011100110	false
27044	1001001101	false
27045	1001001011	false
27046	0010111001	false
27047	0010110101	false
27048	1011100110	false
27049	1010111001	false
27050	1010110101	false
27051	1101111010	false
27052	1011101010	false
27053	1001111010	false
27054	0011101010	false
27055	0001111010	false
27056	1111011110	false
27057	0111011110	false
27058	0100111001	false
27059	0100110101	false
27060	1100111001	false
27061	1100110101	false
27062	0101100110	false
27063	0011011110	false
27064	1101100110	false
27065	1011011110	false
27066	0000111001	false
27067	0000110101	false
27068	0110001101	false
27069	0110001011	false
27070	0110001001	false
27071	1000111001	false
27072	1000110101	false
27073	1110001101	false
27074	1110001011	false
27075	0001100110	false
27076	1001100110	false
27077	0010001101	false
27078	0010001011	false
27079	0010001001	false
27080	1110001001	false
27081	1010001101	false
27082	1010001011	false
27083	1010001001	false
27084	0110111010	false
27085	0110101010	false
27086	1110111010	false
27087	1111011001	false
27088	1111010101	false
27089	1111010011	false
27090	1111010001	false
27091	0111011001	false
27092	0111010101	false
27093	0111010011	false
27094	0111010001	false
27095	1110101010	false
27096	1010111010	false
27097	0101011110	false
27098	0010111010	false
27099	1101011110	false
27100	0011011001	false
27101	0011010101	false
27102	0011010011	false
27103	0011010001	false
27104	1011011001	false
27105	1011010101	false
27106	1011010011	false
27107	1011010001	false
27108	0001011110	false
27109	1001011110	false
27110	0101001001	false
27111	0100001101	false
27112	0100001011	false
27113	0100001001	false
27114	1101001001	false
27115	1100001101	false
27116	1100001011	false
27117	0110100110	false
27118	1110100110	false
27119	0001001001	false
27120	0000001101	false
27121	0000001011	false
27122	0000001001	false
27123	1100001001	false
27124	1001001001	false
27125	1000001101	false
27126	1000001011	false
27127	1000001001	false
27128	0100111010	false
27129	0100101010	false
27130	0010100110	false
27131	1100111010	false
27132	1010100110	false
27133	0101011001	false
27134	0101010101	false
27135	0101010011	false
27136	1101011001	false
27137	1101010101	false
27138	1101010011	false
27139	1100101010	false
27140	1010101010	false
27141	1001101010	false
27142	1000111010	false
27143	1000101010	false
27144	0010101010	false
27145	0001101010	false
27146	0000111010	false
27147	0000101010	false
27148	0001011001	false
27149	0001010101	false
27150	0001010011	false
27151	1001011001	false
27152	1001010101	false
27153	1001010011	false
27154	0110011110	false
27155	1110011110	false
27156	0100100110	false
27157	1111101010	false
27158	1100100110	false
27159	0111101010	false
27160	1010011110	false
27161	0010011110	false
27162	0000100110	false
27163	1000100110	false
27164	0110011001	false
27165	0110010101	false
27166	0110010011	false
27167	0110010001	false
27168	0111110001	false
27169	0111100101	false
27170	1110011001	false
27171	1110010101	false
27172	1110010011	false
27173	1110010001	false
27174	1111110001	false
27175	1111100101	false
27176	0100011110	false
27177	1100011110	false
27178	0011110001	false
27179	0011100101	false
27180	0010011001	false
27181	0010010101	false
27182	0010010011	false
27183	0010010001	false
27184	0011101100	false
27185	1011110001	false
27186	1011100101	false
27187	0101101010	false
27188	0000011110	false
27189	1010011001	false
27190	1010010101	false
27191	1010010011	false
27192	1010010001	false
27193	1011101100	false
27194	1101101010	false
27195	1000011110	false
27196	0101010001	false
27197	0100011001	false
27198	0100010101	false
27199	0100010011	false
27200	0100010001	false
27201	0101110001	false
27202	0101100101	false
27203	1101010001	false
27204	1100011001	false
27205	1100010101	false
27206	1100010011	false
27207	1100010001	false
27208	1101110001	false
27209	1101100101	false
27210	1011100001	false
27211	1001110001	false
27212	1001100101	false
27213	0011100001	false
27214	0001110001	false
27215	0001100101	false
27216	0001010001	false
27217	0000011001	false
27218	0000010101	false
27219	0000010011	false
27220	0000010001	false
27221	1001010001	false
27222	1000011001	false
27223	1000010101	false
27224	1000010011	false
27225	1000010001	false
27226	0110110001	false
27227	0110100101	false
27228	0110100001	false
27229	1110110001	false
27230	1110100101	false
27231	0110101100	false
27232	0100101100	false
27233	1110101100	false
27234	1110100001	false
27235	1010110001	false
27236	1010100101	false
27237	0010110001	false
27238	0010100101	false
27239	1100101100	false
27240	1010101100	false
27241	1001101100	false
27242	1000101100	false
27243	0010101100	false
27244	0001101100	false
27245	0000101100	false
27246	0111101100	false
27247	0111001110	false
27248	0111001100	false
27249	1111101100	false
27250	1111001110	false
27251	0100110001	false
27252	0100100101	false
27253	0100100001	false
27254	1100110001	false
27255	1100100101	false
27256	0011001110	false
27257	1111001100	false
27258	1011001110	false
27259	1100100001	false
27260	1010100001	false
27261	1001100001	false
27262	1000110001	false
27263	1000100101	false
27264	1000100001	false
27265	0010100001	false
27266	0001100001	false
27267	0000110001	false
27268	0000100101	false
27269	0000100001	false
27270	0111100001	false
27271	0111000101	false
27272	0111000011	false
27273	0111000001	false
27274	1111100001	false
27275	1111000101	false
27276	1111000011	false
27277	0101101100	false
27278	0101001110	false
27279	1101101100	false
27280	1101001110	false
27281	1111000001	false
27282	1011000101	false
27283	1011000011	false
27284	1011000001	false
27285	0011000101	false
27286	0011000011	false
27287	0011000001	false
27288	0011001100	false
27289	0001001110	false
27290	1011001100	false
27291	1001001110	false
27292	1111110010	false
27293	0111110010	false
27294	0011110010	false
27295	1011110010	false
27296	0101100001	false
27297	0101000101	false
27298	0101000011	false
27299	1101100001	false
27300	1101000101	false
27301	1101000011	false
27302	0111111100	false
27303	1111111100	false
27304	0101110010	false
27305	1110001110	false
27306	1011111100	false
27307	1001000101	false
27308	1001000011	false
27309	0011111100	false
27310	1101110010	false
27311	0001000101	false
27312	0001000011	false
27313	0110001110	false
27314	0110001100	false
27315	0011100010	false
27316	0001110010	false
27317	0010001110	false
27318	1011100010	false
27319	1001110010	false
27320	1110001100	false
27321	1010001110	false
27322	1111010110	false
27323	1111010100	false
27324	0111010110	false
27325	0111010100	false
27326	1011010110	false
27327	0011010110	false
27328	0101111100	false
27329	1101111100	false
27330	0110000101	false
27331	0110000011	false
27332	0110000001	false
27333	1110000101	false
27334	1110000011	false
27335	0101001100	false
27336	0100001110	false
27337	0100001100	false
27338	0001111100	false
27339	1101001100	false
27340	1100001110	false
27341	1001111100	false
27342	0010000101	false
27343	0010000011	false
27344	0010000001	false
27345	1110000001	false
27346	1010000101	false
27347	1010000011	false
27348	1010000001	false
27349	0110110010	false
27350	0110100010	false
27351	0010001100	false
27352	0001001100	false
27353	0000001110	false
27354	0000001100	false
27355	1100001100	false
27356	1010001100	false
27357	1001001100	false
27358	1000001110	false
27359	1000001100	false
27360	1110110010	false
27361	1101010110	false
27362	0101010110	false
27363	0010110010	false
27364	1110100010	false
27365	1010110010	false
27366	1011010100	false
27367	1001010110	false
27368	0011010100	false
27369	0001010110	false
27370	0101000001	false
27371	0100000101	false
27372	0100000011	false
27373	0100000001	false
27374	1101000001	false
27375	1100000101	false
27376	1100000011	false
27377	0110111100	false
27378	1110111100	false
27379	1100000001	false
27380	1001000001	false
27381	1000000101	false
27382	1000000011	false
27383	1000000001	false
27384	0001000001	false
27385	0000000101	false
27386	0000000011	false
27387	0000000001	false
27388	0100110010	false
27389	0100100010	false
27390	0010111100	false
27391	1100110010	false
27392	1010111100	false
27393	0010100010	false
27394	0001100010	false
27395	0000110010	false
27396	0000100010	false
27397	1100100010	false
27398	1010100010	false
27399	1001100010	false
27400	1000110010	false
27401	1000100010	false
27402	1110010110	false
27403	1110010100	false
27404	0110010110	false
27405	0110010100	false
27406	0111110100	false
27407	1111110100	false
27408	1010010110	false
27409	0010010110	false
27410	0111100010	false
27411	0100111100	false
27412	0011110100	false
27413	1011110100	false
27414	1100111100	false
27415	1111100010	false
27416	0000111100	false
27417	1000111100	false
27418	1101010100	false
27419	1100010110	false
27420	1100010100	false
27421	0101010100	false
27422	0100010110	false
27423	0100010100	false
27424	1111011100	false
27425	1111011010	false
27426	0111011100	false
27427	0111011010	false
27428	0101110100	false
27429	1101110100	false
27430	1010010100	false
27431	1001010100	false
27432	1000010110	false
27433	1000010100	false
27434	0010010100	false
27435	0001010100	false
27436	0000010110	false
27437	0000010100	false
27438	0011011100	false
27439	0011011010	false
27440	0001110100	false
27441	0101100010	false
27442	1011011100	false
27443	1011011010	false
27444	1001110100	false
27445	1101100010	false
27446	0101011100	false
27447	0101011010	false
27448	1101011100	false
27449	1101011010	false
27450	0110110100	false
27451	0001011100	false
27452	0001011010	false
27453	1001011100	false
27454	1001011010	false
27455	1110110100	false
27456	0010110100	false
27457	1010110100	false
27458	0100110100	false
27459	0110011100	false
27460	0110011010	false
27461	1100110100	false
27462	1110011100	false
27463	1110011010	false
27464	0000110100	false
27465	0010011100	false
27466	0010011010	false
27467	1010011100	false
27468	1010011010	false
27469	1000110100	false
27470	0111100100	false
27471	0111000110	false
27472	0111000100	false
27473	1111100100	false
27474	1111000110	false
27475	0100011100	false
27476	0100011010	false
27477	0011100100	false
27478	0011000110	false
27479	1111000100	false
27480	1011100100	false
27481	1011000110	false
27482	1100011100	false
27483	1100011010	false
27484	1011101000	false
27485	0011101000	false
27486	0000011100	false
27487	0000011010	false
27488	1000011100	false
27489	1000011010	false
27490	0101100100	false
27491	0101000110	false
27492	1101100100	false
27493	1101000110	false
27494	0011000100	false
27495	0001100100	false
27496	0001000110	false
27497	1011000100	false
27498	1001100100	false
27499	1001000110	false
27500	0110101000	false
27501	1110101000	false
27502	0111111000	false
27503	1111111000	false
27504	0110100100	false
27505	0110000110	false
27506	0110000100	false
27507	0011111000	false
27508	1110100100	false
27509	1110000110	false
27510	1011111000	false
27511	0100101000	false
27512	0010100100	false
27513	0010000110	false
27514	1110000100	false
27515	1010100100	false
27516	1010000110	false
27517	1100101000	false
27518	1010101000	false
27519	1001101000	false
27520	1000101000	false
27521	0010101000	false
27522	0001101000	false
27523	0000101000	false
27524	0101111000	false
27525	1101111000	false
27526	0111101000	false
27527	0111001010	false
27528	0111001000	false
27529	0101000100	false
27530	0100100100	false
27531	0100000110	false
27532	0100000100	false
27533	0001111000	false
27534	1111101000	false
27535	1111001010	false
27536	1101000100	false
27537	1100100100	false
27538	1100000110	false
27539	1001111000	false
27540	0011001010	false
27541	0011001000	false
27542	0010000100	false
27543	0001000100	false
27544	0000100100	false
27545	0000000110	false
27546	0000000100	false
27547	1111001000	false
27548	1011001010	false
27549	1011001000	false
27550	1100000100	false
27551	1010000100	false
27552	1001000100	false
27553	1000100100	false
27554	1000000110	false
27555	1000000100	false
27556	0101101000	false
27557	0101001010	false
27558	0110111000	false
27559	1101101000	false
27560	1101001010	false
27561	1110111000	false
27562	0001001010	false
27563	0010111000	false
27564	1001001010	false
27565	1010111000	false
27566	0100111000	false
27567	1100111000	false
27568	0110001010	false
27569	0110001000	false
27570	0000111000	false
27571	1110001010	false
27572	1000111000	false
27573	0010001010	false
27574	0010001000	false
27575	1110001000	false
27576	1010001010	false
27577	1010001000	false
27578	1111011000	false
27579	1111010010	false
27580	1111010000	false
27581	0111011000	false
27582	0111010010	false
27583	0111010000	false
27584	0011011000	false
27585	0011010010	false
27586	0011010000	false
27587	1011011000	false
27588	1011010010	false
27589	1011010000	false
27590	0101001000	false
27591	0100001010	false
27592	0100001000	false
27593	1101001000	false
27594	1100001010	false
27595	0001001000	false
27596	0000001010	false
27597	0000001000	false
27598	1100001000	false
27599	1001001000	false
27600	1000001010	false
27601	1000001000	false
27602	0101011000	false
27603	0101010010	false
27604	1101011000	false
27605	1101010010	false
27606	0001011000	false
27607	0001010010	false
27608	1001011000	false
27609	1001010010	false
27610	0110011000	false
27611	0110010010	false
27612	0110010000	false
27613	0111110000	false
27614	1110011000	false
27615	1110010010	false
27616	1110010000	false
27617	1111110000	false
27618	0010011000	false
27619	0010010010	false
27620	0010010000	false
27621	0011110000	false
27622	1010011000	false
27623	1010010010	false
27624	1010010000	false
27625	1011110000	false
27626	0101010000	false
27627	0100011000	false
27628	0100010010	false
27629	0100010000	false
27630	0101110000	false
27631	1101010000	false
27632	1100011000	false
27633	1100010010	false
27634	1100010000	false
27635	1101110000	false
27636	0001010000	false
27637	0000011000	false
27638	0000010010	false
27639	0000010000	false
27640	0011100000	false
27641	0001110000	false
27642	1001010000	false
27643	1000011000	false
27644	1000010010	false
27645	1000010000	false
27646	1011100000	false
27647	1001110000	false
27648	0110110000	false
27649	0110100000	false
27650	1110110000	false
27651	0010110000	false
27652	1110100000	false
27653	1010110000	false
27654	0100110000	false
27655	0100100000	false
27656	1100110000	false
27657	0010100000	false
27658	0001100000	false
27659	0000110000	false
27660	0000100000	false
27661	1100100000	false
27662	1010100000	false
27663	1001100000	false
27664	1000110000	false
27665	1000100000	false
27666	0111100000	false
27667	0111000010	false
27668	0111000000	false
27669	1111100000	false
27670	1111000010	false
27671	0011000010	false
27672	0011000000	false
27673	1111000000	false
27674	1011000010	false
27675	1011000000	false
27676	0101100000	false
27677	0101000010	false
27678	1101100000	false
27679	1101000010	false
27680	1001000010	false
27681	0001000010	false
27682	0110000010	false
27683	0110000000	false
27684	1110000010	false
27685	0010000010	false
27686	0010000000	false
27687	1110000000	false
27688	1010000010	false
27689	1010000000	false
27690	0101000000	false
27691	0100000010	false
27692	0100000000	false
27693	1101000000	false
27694	1100000010	false
27695	1100000000	false
27696	1001000000	false
27697	1000000010	false
27698	1000000000	false
27699	0001000000	false
27700	0000000010	false
27701	0000000000	false
