# Supplementary material
Source: publisher figshare collection journal article supplement (https://springernature.figshare.com/ndownloader/files/17562821)
Supplement: Supplementary file 1 [file 17562821 › CytoscapeSession-2018_09_25-21_15/tables/37956-STG%2C+Model+1/LOCAL_ATTRS-org.cytoscape.model.CyEdge-STG%2C+Model+1+root+default++edge.cytable]

CyCSV-Version	1
SUID	interaction	name	selected
java.lang.Long	java.lang.String	java.lang.String	java.lang.Boolean
STG, Model 1 root default edge
42032			false
42033			false
42034			false
42046			false
42047			false
42048			false
42054			false
42055			false
42057			false
42058			false
42059			false
42060			false
42061			false
42062			false
42063			false
42064			false
42065			false
42066			false
42067			false
42068			false
42069			false
42070			false
42071			false
42072			false
42073			false
42074			false
42075			false
42076			false
42077			false
42078			false
42079			false
42080			false
42081			false
42082			false
42083			false
42084			false
42085			false
42086			false
42087			false
42088			false
42089			false
42090			false
42091			false
42092			false
42093			false
42094			false
42121			false
42122			false
42123			false
42124			false
42125			false
42126			false
42133			false
42134			false
42135			false
42136			false
42137			false
42139			false
42140			false
42141			false
42142			false
42144			false
42145			false
42146			false
42147			false
42148			false
42149			false
42156			false
42157			false
42158			false
42159			false
42160			false
42162			false
42163			false
42164			false
42165			false
42167			false
42168			false
42169			false
42170			false
42171			false
42172			false
42182			false
42183			false
42184			false
42185			false
42186			false
42196			false
42197			false
42198			false
42199			false
42200			false
42201			false
42202			false
42203			false
42204			false
42205			false
42206			false
42207			false
42208			false
42209			false
42210			false
42211			false
42212			false
42213			false
42214			false
42215			false
42216			false
42217			false
42223			false
42224			false
42225			false
42226			false
42227			false
42233			false
42234			false
42235			false
42236			false
42237			false
42242			false
42243			false
42244			false
42245			false
42255			false
42256			false
42257			false
42258			false
42269			false
42270			false
42271			false
42285			false
42286			false
42287			false
42312			false
42313			false
42314			false
42315			false
42316			false
42317			false
42318			false
42319			false
42320			false
42327			false
42328			false
42329			false
42330			false
42331			false
42332			false
42333			false
42334			false
42335			false
42359			false
42360			false
42361			false
42362			false
42363			false
42364			false
42365			false
42367			false
42368			false
42369			false
42370			false
42371			false
42372			false
42373			false
42374			false
42375			false
42376			false
42377			false
42378			false
42379			false
42380			false
42381			false
42382			false
42383			false
42389			false
42390			false
42392			false
42393			false
42399			false
42401			false
42402			false
42403			false
42405			false
42406			false
42449			false
42450			false
42451			false
42452			false
42453			false
42468			false
42469			false
42470			false
42471			false
42476			false
42478			false
42479			false
42480			false
42481			false
42483			false
42484			false
42485			false
42486			false
42491			false
42492			false
42493			false
42495			false
42496			false
42497			false
42498			false
42499			false
42500			false
42501			false
42502			false
42519			false
42520			false
42521			false
42522			false
42523			false
42524			false
42525			false
42526			false
42527			false
42528			false
42529			false
42530			false
42531			false
42532			false
42533			false
42534			false
42535			false
42537			false
42538			false
42547			false
42548			false
42549			false
42550			false
42551			false
42552			false
42553			false
42554			false
42555			false
42557			false
42558			false
42570			false
42571			false
42572			false
42574			false
42575			false
42576			false
42578			false
42579			false
42580			false
42582			false
42583			false
42584			false
42585			false
42600			false
42601			false
42602			false
42603			false
42608			false
42610			false
42611			false
42612			false
42613			false
42615			false
42616			false
42617			false
42618			false
42620			false
42621			false
42622			false
42623			false
42625			false
42626			false
42627			false
42628			false
42629			false
42630			false
42631			false
42632			false
42633			false
42634			false
42639			false
42640			false
42641			false
42642			false
42649			false
42650			false
42651			false
42654			false
42655			false
42656			false
42657			false
42658			false
42659			false
42660			false
42661			false
42670			false
42671			false
42672			false
42676			false
42677			false
42678			false
42758			false
42759			false
42760			false
42761			false
42762			false
42763			false
42764			false
42765			false
42766			false
42767			false
42768			false
42769			false
42770			false
42771			false
42772			false
42773			false
42774			false
42775			false
42776			false
42777			false
42778			false
42779			false
42780			false
42781			false
42782			false
42783			false
42784			false
42785			false
42786			false
42787			false
42788			false
42789			false
42790			false
42791			false
42792			false
42793			false
42794			false
42795			false
42796			false
42797			false
42798			false
42799			false
42800			false
42801			false
42802			false
42803			false
42804			false
42805			false
42806			false
42807			false
42808			false
42809			false
42810			false
42811			false
42812			false
42813			false
42814			false
42815			false
42816			false
42817			false
42878			false
42879			false
42880			false
42881			false
42882			false
42883			false
42884			false
42885			false
42886			false
42887			false
42888			false
42889			false
42890			false
42891			false
42892			false
42893			false
42894			false
42895			false
42896			false
42897			false
42898			false
42899			false
42900			false
42901			false
42902			false
42903			false
42904			false
42905			false
42906			false
42907			false
42908			false
42909			false
42910			false
42911			false
42912			false
42913			false
42914			false
42915			false
42916			false
42917			false
42918			false
42919			false
42920			false
42921			false
42922			false
42923			false
42924			false
42925			false
42926			false
42927			false
42928			false
42929			false
42930			false
42935			false
42936			false
42937			false
42938			false
42939			false
42940			false
42941			false
42942			false
42943			false
42944			false
42945			false
42946			false
42947			false
42948			false
42949			false
42955			false
42956			false
42976			false
42977			false
42978			false
42979			false
42980			false
42981			false
42982			false
42983			false
42984			false
42985			false
42986			false
42987			false
42991			false
42992			false
42994			false
42995			false
42996			false
42998			false
42999			false
43000			false
43001			false
43002			false
43003			false
43007			false
43009			false
43010			false
43012			false
43013			false
43014			false
43015			false
43017			false
43018			false
43019			false
43055			false
43056			false
43057			false
43058			false
43059			false
43060			false
43061			false
43078			false
43079			false
43080			false
43081			false
43082			false
43083			false
43084			false
43085			false
43086			false
43087			false
43088			false
43089			false
43090			false
43091			false
43092			false
43093			false
43094			false
43095			false
43096			false
43097			false
43098			false
43099			false
43100			false
43101			false
39024			false
39025			false
39026			false
39027			false
39028			false
39029			false
39031			false
39032			false
39033			false
39035			false
39036			false
39037			false
39054			false
39055			false
39056			false
39057			false
39058			false
39059			false
39060			false
39061			false
39062			false
39063			false
39065			false
39066			false
39067			false
39068			false
39070			false
39071			false
39072			false
39073			false
39118			false
39119			false
39120			false
39121			false
39122			false
39123			false
39124			false
39125			false
39126			false
39127			false
39128			false
39129			false
39130			false
39131			false
39132			false
39141			false
39142			false
39143			false
39144			false
39145			false
39147			false
39148			false
39149			false
39150			false
39158			false
39159			false
39160			false
39161			false
39163			false
39164			false
39165			false
39166			false
39238			false
39239			false
39240			false
39241			false
39242			false
39243			false
39244			false
39245			false
39255			false
39256			false
39258			false
39259			false
39264			false
39265			false
39266			false
39267			false
39268			false
39269			false
39270			false
39271			false
39272			false
39273			false
39274			false
39275			false
39276			false
39277			false
39278			false
39279			false
39280			false
39281			false
39282			false
39283			false
39284			false
39285			false
39286			false
39287			false
39288			false
39289			false
39290			false
39291			false
39292			false
39293			false
39294			false
39295			false
39296			false
39297			false
39298			false
39299			false
39306			false
39308			false
39309			false
39310			false
39311			false
39312			false
39314			false
39315			false
39316			false
39317			false
39318			false
39319			false
39321			false
39322			false
39323			false
39324			false
39325			false
39326			false
39328			false
39329			false
39330			false
39331			false
39332			false
39333			false
39340			false
39341			false
39342			false
39343			false
39344			false
39346			false
39347			false
39348			false
39349			false
39350			false
39352			false
39353			false
39354			false
39355			false
39356			false
39358			false
39359			false
39360			false
39361			false
39362			false
39363			false
39368			false
39369			false
39370			false
39371			false
39383			false
39392			false
39397			false
39398			false
39399			false
39400			false
39401			false
39402			false
39403			false
39404			false
39408			false
39409			false
39410			false
39411			false
39412			false
39416			false
39417			false
39418			false
39419			false
39421			false
39422			false
39423			false
39425			false
39426			false
39427			false
39430			false
39431			false
39432			false
39433			false
39434			false
39435			false
39437			false
39438			false
39440			false
39441			false
39456			false
39457			false
39458			false
39459			false
39460			false
39470			false
39472			false
39474			false
39524			false
39525			false
39526			false
39527			false
39528			false
39529			false
39532			false
39533			false
39534			false
39535			false
39536			false
39546			false
39547			false
39548			false
39549			false
39551			false
39552			false
39559			false
39560			false
39561			false
39563			false
39564			false
39594			false
39598			false
39600			false
39601			false
39602			false
39603			false
39605			false
39606			false
39607			false
39631			false
39633			false
39634			false
39636			false
39637			false
39638			false
39639			false
39640			false
39641			false
39642			false
39643			false
39644			false
39656			false
39657			false
39658			false
39664			false
39665			false
39666			false
39667			false
39668			false
39669			false
39670			false
39671			false
39672			false
39679			false
39681			false
39682			false
39683			false
39684			false
39685			false
39686			false
39688			false
39689			false
39690			false
39691			false
39692			false
39693			false
39700			false
39701			false
39702			false
39703			false
39704			false
39706			false
39707			false
39708			false
39709			false
39710			false
39711			false
39713			false
39714			false
39716			false
39717			false
39737			false
39738			false
39739			false
39740			false
39741			false
39742			false
39743			false
39744			false
39745			false
39746			false
39747			false
39748			false
39749			false
39750			false
39751			false
39753			false
39754			false
39755			false
39756			false
39757			false
39758			false
39759			false
39760			false
39762			false
39763			false
39764			false
39765			false
39766			false
39772			false
39774			false
39775			false
39776			false
39777			false
39779			false
39780			false
39781			false
39782			false
39783			false
39785			false
39786			false
39787			false
39788			false
39790			false
39791			false
39792			false
39793			false
39794			false
39800			false
39801			false
39802			false
39803			false
39805			false
39806			false
39807			false
39808			false
39810			false
39811			false
39812			false
39814			false
39815			false
39816			false
39817			false
39818			false
39827			false
39828			false
39829			false
39843			false
39844			false
39845			false
39848			false
39849			false
39850			false
39851			false
39852			false
39853			false
39854			false
39855			false
39856			false
39858			false
39859			false
39861			false
39862			false
39889			false
39890			false
39891			false
39892			false
39893			false
39894			false
39895			false
39896			false
39898			false
39899			false
39900			false
39923			false
39924			false
39925			false
39926			false
39927			false
39928			false
39929			false
39935			false
39936			false
39937			false
39946			false
39947			false
39948			false
39949			false
39950			false
39951			false
39952			false
39953			false
39954			false
39955			false
39956			false
39957			false
39958			false
39959			false
39960			false
39961			false
39962			false
39963			false
39965			false
39966			false
39967			false
39968			false
39969			false
39971			false
39972			false
39973			false
39974			false
39975			false
39976			false
39977			false
39978			false
39979			false
39980			false
39981			false
39983			false
39984			false
39985			false
39987			false
39988			false
39989			false
40061			false
40062			false
40063			false
40064			false
40065			false
40066			false
40067			false
40068			false
40069			false
40070			false
40071			false
40072			false
40073			false
40074			false
40075			false
40076			false
40077			false
40078			false
40079			false
40080			false
40081			false
40082			false
40083			false
40105			false
40106			false
40107			false
40114			false
40116			false
40117			false
40118			false
40120			false
40121			false
40122			false
40123			false
40124			false
40125			false
40126			false
40128			false
40129			false
40130			false
40131			false
40132			false
40133			false
40134			false
40138			false
40139			false
40140			false
40141			false
40142			false
40146			false
40147			false
40148			false
40149			false
40150			false
40152			false
40153			false
40154			false
40155			false
40157			false
40158			false
40159			false
40160			false
40161			false
40162			false
40163			false
40164			false
40166			false
40168			false
40169			false
40170			false
40171			false
40172			false
40173			false
40174			false
40191			false
40192			false
40194			false
40195			false
40239			false
40240			false
40241			false
40242			false
40243			false
40244			false
40245			false
40246			false
40247			false
40248			false
40249			false
40250			false
40251			false
40252			false
40253			false
40265			false
40266			false
40267			false
40268			false
40269			false
40275			false
40277			false
40278			false
40279			false
40280			false
40281			false
40283			false
40284			false
40285			false
40286			false
40287			false
40289			false
40290			false
40291			false
40292			false
40293			false
40299			false
40300			false
40301			false
40302			false
40304			false
40305			false
40306			false
40307			false
40309			false
40310			false
40311			false
40312			false
40313			false
40318			false
40319			false
40320			false
40321			false
40322			false
40323			false
40324			false
40325			false
40352			false
40353			false
40355			false
40356			false
40357			false
40358			false
40375			false
40376			false
40378			false
40379			false
40380			false
40382			false
40383			false
40390			false
40391			false
40392			false
40393			false
40427			false
40429			false
40430			false
40437			false
40438			false
40439			false
40440			false
40452			false
40453			false
40454			false
40456			false
40457			false
40458			false
40466			false
40467			false
40468			false
40469			false
40470			false
40471			false
40472			false
40473			false
40474			false
40475			false
40476			false
40477			false
40485			false
40486			false
40487			false
40488			false
40489			false
40490			false
40491			false
40492			false
40493			false
40505			false
40507			false
40508			false
40509			false
40510			false
40511			false
40512			false
40513			false
40514			false
40515			false
40529			false
40530			false
40531			false
40532			false
40536			false
40537			false
40538			false
40539			false
40547			false
40548			false
40549			false
40550			false
40557			false
40558			false
40559			false
40560			false
40573			false
40574			false
40575			false
40576			false
40577			false
40578			false
40579			false
40580			false
40581			false
40582			false
40583			false
40584			false
40585			false
40586			false
40587			false
40588			false
40589			false
40590			false
40594			false
40595			false
40596			false
40601			false
40602			false
40603			false
40605			false
40606			false
40621			false
40622			false
40623			false
40625			false
40626			false
40634			false
40635			false
40636			false
40637			false
40639			false
40640			false
40641			false
40750			false
40751			false
40752			false
40753			false
40758			false
40759			false
40760			false
40761			false
40803			false
40804			false
40806			false
40807			false
40808			false
40809			false
40810			false
40811			false
40812			false
40813			false
40814			false
40815			false
40816			false
40817			false
40818			false
40819			false
40820			false
40821			false
40822			false
40823			false
40824			false
40825			false
40826			false
40827			false
40828			false
40829			false
40830			false
40831			false
40832			false
40833			false
40834			false
40835			false
40845			false
40846			false
40847			false
40849			false
40850			false
40851			false
40852			false
40853			false
40854			false
40855			false
40856			false
40857			false
40858			false
40859			false
40860			false
40861			false
40862			false
40863			false
40864			false
40865			false
40866			false
40867			false
40869			false
40870			false
40871			false
40872			false
40873			false
40874			false
40875			false
40876			false
40877			false
40878			false
40879			false
40880			false
40881			false
40882			false
40883			false
40884			false
40885			false
40886			false
40887			false
40888			false
40889			false
40890			false
40891			false
40892			false
40896			false
40897			false
40898			false
40899			false
40900			false
40901			false
40906			false
40907			false
40908			false
40909			false
40910			false
40911			false
40912			false
40913			false
40914			false
40915			false
40916			false
40917			false
40918			false
40919			false
40920			false
40921			false
40922			false
40923			false
40924			false
40925			false
40926			false
40927			false
40928			false
40929			false
40930			false
40931			false
40932			false
40933			false
40934			false
40935			false
40936			false
40937			false
40938			false
40944			false
40946			false
40947			false
40948			false
40949			false
40951			false
40952			false
40953			false
40954			false
40955			false
40956			false
40958			false
40959			false
40960			false
40961			false
40962			false
40968			false
40969			false
40970			false
40971			false
40973			false
40974			false
40975			false
40976			false
40977			false
40979			false
40980			false
40981			false
40982			false
40983			false
40984			false
40985			false
40986			false
40988			false
40989			false
40990			false
40991			false
40992			false
40993			false
40994			false
40995			false
40996			false
40998			false
40999			false
41000			false
41001			false
41002			false
41003			false
41018			false
41019			false
41020			false
41021			false
41022			false
41030			false
41031			false
41032			false
41033			false
41037			false
41038			false
41039			false
41040			false
41041			false
41043			false
41044			false
41045			false
41046			false
41106			false
41107			false
41108			false
41109			false
41110			false
41111			false
41112			false
41113			false
41157			false
41158			false
41159			false
41160			false
41175			false
41176			false
41177			false
41179			false
41180			false
41181			false
41182			false
41183			false
41184			false
41185			false
41186			false
41187			false
41188			false
41189			false
41190			false
41191			false
41192			false
41193			false
41194			false
41195			false
41196			false
41197			false
41198			false
41199			false
41200			false
41201			false
41202			false
41203			false
41204			false
41205			false
41206			false
41207			false
41208			false
41209			false
41210			false
41211			false
41212			false
41213			false
41214			false
41215			false
41216			false
41217			false
41218			false
41219			false
41220			false
41221			false
41222			false
41223			false
41224			false
41225			false
41226			false
41227			false
41228			false
41229			false
41230			false
41231			false
41232			false
41233			false
41234			false
41235			false
41236			false
41237			false
41238			false
41239			false
41240			false
41241			false
41242			false
41243			false
41244			false
41245			false
41246			false
41247			false
41254			false
41255			false
41256			false
41257			false
41259			false
41265			false
41266			false
41267			false
41269			false
41270			false
41271			false
41272			false
41273			false
41274			false
41275			false
41276			false
41277			false
41279			false
41280			false
41281			false
41282			false
41283			false
41284			false
41285			false
41286			false
41287			false
41288			false
41289			false
41290			false
41291			false
41292			false
41293			false
41294			false
41295			false
41296			false
41297			false
41298			false
41299			false
41301			false
41302			false
41303			false
41304			false
41305			false
41306			false
41307			false
41308			false
41309			false
41310			false
41311			false
41312			false
41313			false
41345			false
41346			false
41347			false
41348			false
41349			false
41350			false
41364			false
41365			false
41366			false
41367			false
41368			false
41374			false
41376			false
41377			false
41378			false
41379			false
41380			false
41382			false
41383			false
41384			false
41385			false
41386			false
41392			false
41393			false
41394			false
41395			false
41397			false
41398			false
41399			false
41400			false
41401			false
41431			false
41432			false
41433			false
41434			false
41435			false
41436			false
41437			false
41438			false
41439			false
41440			false
41441			false
41442			false
41443			false
41444			false
41445			false
41446			false
41447			false
41448			false
41449			false
41450			false
41464			false
41465			false
41466			false
41467			false
41472			false
41474			false
41475			false
41476			false
41478			false
41479			false
41480			false
41481			false
41482			false
41484			false
41485			false
41486			false
41488			false
41489			false
41490			false
41491			false
41496			false
41497			false
41498			false
41500			false
41501			false
41502			false
41503			false
41505			false
41506			false
41508			false
41509			false
41510			false
41511			false
41545			false
41546			false
41547			false
41548			false
41549			false
41550			false
41551			false
41552			false
41553			false
41554			false
41555			false
41556			false
41557			false
41558			false
41586			false
41587			false
41603			false
41605			false
41606			false
41617			false
41618			false
41619			false
41620			false
41621			false
41622			false
41623			false
41624			false
41625			false
41626			false
41627			false
41628			false
41629			false
41630			false
41631			false
41638			false
41639			false
41652			false
41654			false
41655			false
41656			false
41657			false
41659			false
41660			false
41661			false
41664			false
41665			false
41673			false
41674			false
41690			false
41691			false
41728			false
41729			false
41746			false
41747			false
41748			false
41749			false
41750			false
41751			false
41752			false
41753			false
41754			false
41755			false
41756			false
41757			false
41758			false
41759			false
41761			false
41762			false
41763			false
41764			false
41765			false
41766			false
41767			false
41768			false
41770			false
41804			false
41805			false
41806			false
41808			false
41809			false
41810			false
41812			false
41813			false
41814			false
41815			false
41816			false
41817			false
41818			false
41819			false
41824			false
41826			false
41827			false
41828			false
41829			false
41831			false
41832			false
41833			false
41834			false
41836			false
41837			false
41838			false
41839			false
41844			false
41845			false
41846			false
41847			false
41848			false
41849			false
41850			false
41851			false
41867			false
41868			false
41869			false
41877			false
41878			false
41879			false
41880			false
41881			false
41882			false
41883			false
41884			false
41885			false
41886			false
41887			false
41888			false
41889			false
41890			false
41891			false
41892			false
41893			false
41894			false
41895			false
41896			false
41897			false
41898			false
41899			false
41900			false
41901			false
41902			false
41909			false
41910			false
41911			false
41912			false
41913			false
41914			false
41915			false
41917			false
41918			false
41919			false
41920			false
41921			false
41922			false
41923			false
41924			false
41925			false
41926			false
41927			false
41928			false
41930			false
41931			false
41932			false
41933			false
41934			false
41935			false
41936			false
41937			false
41938			false
41939			false
41940			false
41941			false
41942			false
41943			false
41944			false
41945			false
41946			false
41948			false
41949			false
41950			false
41951			false
41957			false
41958			false
41959			false
41961			false
41962			false
41963			false
41965			false
41966			false
41967			false
41968			false
41969			false
41970			false
41971			false
41972			false
41977			false
41979			false
41980			false
41981			false
41983			false
41984			false
41985			false
41986			false
41988			false
41989			false
41990			false
41991			false
42016			false
42018			false
42019			false
42020			false
42021			false
42023			false
42024			false
42025			false
42026			false
42027			false
42028			false
42029			false
42030			false
42031			false
42035			false
42037			false
42038			false
42039			false
42040			false
42041			false
42042			false
42043			false
42044			false
42045			false
42050			false
42051			false
42052			false
42095			false
42097			false
42098			false
42099			false
42100			false
42101			false
42103			false
42104			false
42105			false
42106			false
42107			false
42108			false
42110			false
42111			false
42112			false
42113			false
42114			false
42116			false
42117			false
42118			false
42119			false
42120			false
42127			false
42128			false
42129			false
42130			false
42131			false
42150			false
42151			false
42152			false
42153			false
42154			false
42173			false
42174			false
42175			false
42177			false
42178			false
42179			false
42180			false
42187			false
42188			false
42189			false
42191			false
42192			false
42193			false
42194			false
42218			false
42220			false
42221			false
42228			false
42230			false
42231			false
42238			false
42239			false
42240			false
42241			false
42246			false
42248			false
42249			false
42250			false
42252			false
42253			false
42254			false
42259			false
42261			false
42262			false
42263			false
42265			false
42266			false
42267			false
42272			false
42273			false
42275			false
42276			false
42277			false
42278			false
42279			false
42281			false
42282			false
42283			false
42288			false
42290			false
42291			false
42292			false
42293			false
42295			false
42296			false
42297			false
42298			false
42300			false
42301			false
42302			false
42303			false
42305			false
42306			false
42307			false
42309			false
42310			false
42311			false
42321			false
42322			false
42323			false
42324			false
42325			false
42326			false
42337			false
42338			false
42339			false
42340			false
42341			false
42342			false
42343			false
42344			false
42345			false
42346			false
42347			false
42348			false
42349			false
42350			false
42351			false
42352			false
42353			false
42354			false
42355			false
42356			false
42357			false
42384			false
42385			false
42386			false
42387			false
42394			false
42395			false
42396			false
42397			false
42398			false
42407			false
42409			false
42410			false
42411			false
42413			false
42414			false
42415			false
42416			false
42418			false
42419			false
42420			false
42422			false
42423			false
42424			false
42426			false
42427			false
42428			false
42430			false
42431			false
42432			false
42434			false
42435			false
42436			false
42437			false
42438			false
42439			false
42441			false
42442			false
42444			false
42445			false
42446			false
42447			false
42448			false
42454			false
42455			false
42456			false
42457			false
42459			false
42460			false
42461			false
42462			false
42463			false
[truncated: 1,588 more rows]
