# Supplementary material
Source: publisher figshare collection journal article supplement (https://springernature.figshare.com/ndownloader/files/17562821)
Supplement: Supplementary file 1 [file 17562821 › CytoscapeSession-2018_09_25-21_15/tables/37956-STG%2C+Model+1/LOCAL_ATTRS-org.cytoscape.model.CyNode-STG%2C+Model+1+root+default++node.cytable]

CyCSV-Version	1
SUID	name	selected
java.lang.Long	java.lang.String	java.lang.Boolean
STG, Model 1 root default node
38926		false
38925		false
38924		false
38923		false
38922		false
38921		false
38920		false
38919		false
38918		false
38917		false
38916		false
38915		false
38914		false
38893		false
38892		false
38891		false
38890		false
38889		false
38888		false
38887		false
38886		false
38885		false
38884		false
38883		false
38882		false
38881		false
38880		false
38879		false
38878		false
38877		false
38875		false
38873		false
38872		false
38869		false
38866		false
38865		false
38862		false
38855		false
38853		false
38852		false
38851		false
38846		false
38845		false
38844		false
38839		false
38838		false
38832		false
38831		false
38830		false
38825		false
38822		false
38820		false
38819		false
38818		false
38817		false
38816		false
38814		false
38813		false
38812		false
38811		false
38810		false
38809		false
38808		false
38807		false
38806		false
38805		false
38804		false
38801		false
38798		false
38789		false
38788		false
38787		false
38786		false
38785		false
38782		false
38781		false
38778		false
38777		false
38776		false
38775		false
38774		false
38772		false
38771		false
38770		false
38769		false
38767		false
38766		false
38764		false
38763		false
38761		false
38760		false
38757		false
38754		false
38747		false
38746		false
38743		false
38742		false
38738		false
38734		false
38731		false
38730		false
38729		false
38728		false
38719		false
38717		false
38716		false
38715		false
38713		false
38712		false
38711		false
38710		false
38709		false
38708		false
38707		false
38706		false
38702		false
38697		false
38696		false
38694		false
38682		false
38681		false
38672		false
38670		false
38669		false
38668		false
38667		false
38664		false
38660		false
38655		false
38654		false
38653		false
38652		false
38651		false
38650		false
38649		false
38648		false
38647		false
38646		false
38638		false
38637		false
38636		false
38635		false
38634		false
38631		false
38630		false
38629		false
38628		false
38627		false
38626		false
38624		false
38623		false
38622		false
38621		false
38619		false
38618		false
38616		false
38611		false
38610		false
38609		false
38607		false
38606		false
38599		false
38598		false
38597		false
38595		false
38594		false
38593		false
38592		false
38590		false
38589		false
38588		false
38587		false
38586		false
38585		false
38580		false
38579		false
38578		false
38577		false
38576		false
38575		false
38574		false
38569		false
38564		false
38562		false
38561		false
38560		false
38554		false
38553		false
38552		false
38551		false
38550		false
38547		false
38544		false
38542		false
38541		false
38540		false
38539		false
38538		false
38536		false
38535		false
38534		false
38533		false
38532		false
38531		false
38530		false
38517		false
38514		false
38496		false
38495		false
38494		false
38493		false
38491		false
38490		false
38489		false
38488		false
38487		false
38486		false
38485		false
38484		false
38483		false
38482		false
38479		false
38478		false
38477		false
38476		false
38475		false
38474		false
38473		false
38472		false
38471		false
38470		false
38469		false
38468		false
38465		false
38463		false
38462		false
38460		false
38459		false
38458		false
38448		false
38444		false
38436		false
38434		false
38422		false
38421		false
38411		false
38410		false
38409		false
38408		false
38407		false
38406		false
38405		false
38404		false
38402		false
38400		false
38399		false
38398		false
38397		false
38396		false
38395		false
38394		false
38393		false
38392		false
38391		false
38390		false
38389		false
38388		false
38387		false
38386		false
38385		false
38384		false
38383		false
38382		false
38381		false
38378		false
38377		false
38374		false
38373		false
38372		false
38369		false
38367		false
38361		false
38360		false
38358		false
38356		false
38354		false
38353		false
38350		false
38349		false
38348		false
38347		false
38343		false
38342		false
38338		false
38337		false
38333		false
38332		false
38329		false
38328		false
38326		false
38324		false
38323		false
38322		false
38321		false
38320		false
38319		false
38318		false
38316		false
38311		false
38310		false
38309		false
38305		false
38304		false
38303		false
38302		false
38297		false
38296		false
38292		false
38288		false
38286		false
38285		false
38284		false
38283		false
38279		false
38278		false
38277		false
38276		false
38275		false
38274		false
38273		false
38272		false
38271		false
38270		false
38269		false
38268		false
38267		false
38264		false
38263		false
38262		false
38252		false
38250		false
38244		false
38242		false
38241		false
38240		false
38239		false
38238		false
38231		false
38230		false
38229		false
38228		false
38227		false
38226		false
38225		false
38224		false
38223		false
38222		false
38221		false
38220		false
38219		false
38218		false
38217		false
38216		false
38215		false
38214		false
38201		false
38200		false
38198		false
38195		false
38194		false
38193		false
38192		false
38191		false
38187		false
38186		false
38185		false
38184		false
38179		false
38177		false
38176		false
38175		false
38173		false
38172		false
38167		false
38162		false
38160		false
38157		false
38153		false
38152		false
38151		false
38150		false
38145		false
38142		false
38139		false
38138		false
38136		false
38135		false
38134		false
38130		false
38129		false
38128		false
38127		false
38126		false
38120		false
38118		false
38117		false
38116		false
38115		false
38114		false
38113		false
38112		false
38109		false
38106		false
38105		false
38102		false
38099		false
38098		false
38097		false
38096		false
38095		false
38094		false
38093		false
38092		false
38091		false
38090		false
38089		false
38088		false
38085		false
38084		false
38081		false
38080		false
38079		false
38078		false
38073		false
38072		false
38068		false
38066		false
38063		false
38062		false
38060		false
38058		false
38057		false
38054		false
38049		false
38044		false
38037		false
38036		false
38033		false
38032		false
38029		false
38028		false
38027		false
38026		false
38025		false
38024		false
38023		false
38022		false
38021		false
38020		false
38019		false
38018		false
38017		false
38016		false
38013		false
38010		false
38005		false
38004		false
38003		false
38002		false
38001		false
38000		false
37999		false
37998		false
37993		false
37992		false
37991		false
37990		false
37985		false
37984		false
37983		false
37982		false
38993		false
38992		false
38991		false
38990		false
38989		false
38988		false
38987		false
38986		false
38979		false
38978		false
38977		false
38976		false
38975		false
38974		false
38973		false
38972		false
38971		false
38970		false
38966		false
38961		false
38957		false
38956		false
38955		false
38954		false
38953		false
38952		false
38950		false
38944		false
38929		false
38928		false
38927		false
38913		false
38912		false
38911		false
38910		false
38909		false
38908		false
38907		false
38906		false
38905		false
38904		false
38903		false
38902		false
38901		false
38900		false
38899		false
38898		false
38897		false
38896		false
38895		false
38894		false
38876		false
38874		false
38871		false
38870		false
38868		false
38867		false
38864		false
38863		false
38861		false
38860		false
38859		false
38858		false
38857		false
38856		false
38854		false
38850		false
38849		false
38848		false
38847		false
38843		false
38842		false
38841		false
38840		false
38837		false
38836		false
38835		false
38834		false
38833		false
38829		false
38828		false
38827		false
38826		false
38824		false
38823		false
38821		false
38815		false
38803		false
38802		false
38800		false
38799		false
38797		false
38796		false
38795		false
38794		false
38793		false
38792		false
38791		false
38790		false
38784		false
38783		false
38780		false
38779		false
38773		false
38768		false
38765		false
38762		false
38759		false
38758		false
38756		false
38755		false
38753		false
38752		false
38751		false
38750		false
38749		false
38748		false
38745		false
38744		false
38741		false
38740		false
38739		false
38737		false
38736		false
38735		false
38733		false
38732		false
38727		false
38726		false
38725		false
38724		false
38723		false
38722		false
38721		false
38720		false
38718		false
38714		false
38705		false
38704		false
38703		false
38701		false
38700		false
38699		false
38698		false
38695		false
38693		false
38692		false
38691		false
38690		false
38689		false
38688		false
38687		false
38686		false
38685		false
38684		false
38683		false
38680		false
38679		false
38678		false
38677		false
38676		false
38675		false
38674		false
38673		false
38671		false
38666		false
38665		false
38663		false
38662		false
38661		false
38659		false
38658		false
38657		false
38656		false
38645		false
38644		false
38643		false
38642		false
38641		false
38640		false
38639		false
38633		false
38632		false
38625		false
38620		false
38617		false
38615		false
38614		false
38613		false
38612		false
38608		false
38605		false
38604		false
38603		false
38602		false
38601		false
38600		false
38596		false
38591		false
38584		false
38583		false
38582		false
38581		false
38573		false
38572		false
38571		false
38570		false
38568		false
38567		false
38566		false
38565		false
38563		false
38559		false
38558		false
38557		false
38556		false
38555		false
38549		false
38548		false
38546		false
38545		false
38543		false
38537		false
38529		false
38528		false
38527		false
38526		false
38525		false
38524		false
38523		false
38522		false
38521		false
38520		false
38519		false
38518		false
38516		false
38515		false
38513		false
38512		false
38511		false
38510		false
38509		false
38508		false
38507		false
38506		false
38505		false
38504		false
38503		false
38502		false
38501		false
38500		false
38499		false
38498		false
38497		false
38492		false
38481		false
38480		false
38467		false
38466		false
38464		false
38461		false
38457		false
38456		false
38455		false
38454		false
38453		false
38452		false
38451		false
38450		false
38449		false
38447		false
38446		false
38445		false
38443		false
38442		false
38441		false
38440		false
38439		false
38438		false
38437		false
38435		false
38433		false
38432		false
38431		false
38430		false
38429		false
38428		false
38427		false
38426		false
38425		false
38424		false
38423		false
38420		false
38419		false
38418		false
38417		false
38416		false
38415		false
38414		false
38413		false
38412		false
38403		false
38401		false
38380		false
38379		false
38376		false
38375		false
38371		false
38370		false
38368		false
38366		false
38365		false
38364		false
38363		false
38362		false
38359		false
38357		false
38355		false
38352		false
38351		false
38346		false
38345		false
38344		false
38341		false
38340		false
38339		false
38336		false
38335		false
38334		false
38331		false
38330		false
38327		false
38325		false
38317		false
38315		false
38314		false
38313		false
38312		false
38308		false
38307		false
38306		false
38301		false
38300		false
38299		false
38298		false
38295		false
38294		false
38293		false
38291		false
38290		false
38289		false
38287		false
38282		false
38281		false
38280		false
38266		false
38265		false
38261		false
38260		false
38259		false
38258		false
38257		false
38256		false
38255		false
38254		false
38253		false
38251		false
38249		false
38248		false
38247		false
38246		false
38245		false
38243		false
38237		false
38236		false
38235		false
38234		false
38233		false
38232		false
38213		false
38212		false
38211		false
38210		false
38209		false
38208		false
38207		false
38206		false
38205		false
38204		false
38203		false
38202		false
38199		false
38197		false
38196		false
38190		false
38189		false
38188		false
38183		false
38182		false
38181		false
38180		false
38178		false
38174		false
38171		false
38170		false
38169		false
38168		false
38166		false
38165		false
38164		false
38163		false
38161		false
38159		false
38158		false
38156		false
38155		false
38154		false
38149		false
38148		false
38147		false
38146		false
38144		false
38143		false
38141		false
38140		false
38137		false
38133		false
38132		false
38131		false
38125		false
38124		false
38123		false
38122		false
38121		false
38119		false
38111		false
38110		false
38108		false
38107		false
38104		false
38103		false
38101		false
38100		false
38087		false
38086		false
38083		false
38082		false
38077		false
38076		false
38075		false
38074		false
38071		false
38070		false
38069		false
38067		false
38065		false
38064		false
38061		false
38059		false
38056		false
38055		false
38053		false
38052		false
38051		false
38050		false
38048		false
38047		false
38046		false
38045		false
38043		false
38042		false
38041		false
38040		false
38039		false
38038		false
38035		false
38034		false
38031		false
38030		false
38015		false
38014		false
38012		false
38011		false
38009		false
38008		false
38007		false
38006		false
37997		false
37996		false
37995		false
37994		false
37989		false
37988		false
37987		false
37986		false
39005		false
39004		false
39003		false
39002		false
39001		false
39000		false
38999		false
38998		false
38997		false
38996		false
38995		false
38994		false
38985		false
38984		false
38983		false
38982		false
38981		false
38980		false
38969		false
38968		false
38967		false
38965		false
38964		false
38963		false
38962		false
38960		false
38959		false
38958		false
38951		false
38949		false
38948		false
38947		false
38946		false
38945		false
38943		false
38942		false
38941		false
38940		false
38939		false
38938		false
38937		false
38936		false
38935		false
38934		false
38933		false
38932		false
38931		false
38930		false
