# Supplementary material
Source: publisher figshare collection journal article supplement (https://springernature.figshare.com/ndownloader/files/17562821)
Supplement: Supplementary file 1 [file 17562821 › CytoscapeSession-2018_09_25-21_15/tables/37956-STG%2C+Model+1/SHARED_ATTRS-org.cytoscape.model.CyEdge-STG%2C+Model+1+root+shared++edge.cytable]

CyCSV-Version	1
SUID	shared interaction	shared name
java.lang.Long	java.lang.String	java.lang.String
STG, Model 1 root shared edge
42032	1	0100111100 (1) 0000111100
42033	1	0100111100 (1) 0101111100
42034	1	0100111100 (1) 0100011100
42046	1	1100111100 (1) 1000111100
42047	1	1100111100 (1) 1101111100
42048	1	1100111100 (1) 1100011100
42054	1	0000111100 (1) 0001111100
42055	1	0000111100 (1) 0000011100
42057	1	1000111100 (1) 1001111100
42058	1	1000111100 (1) 1000011100
42059	1	1101010100 (1) 1001010100
42060	1	1101010100 (1) 1101110100
42061	1	1101010100 (1) 1101000100
42062	1	1101010100 (1) 1101011100
42063	1	1101010100 (1) 1101010000
42064	1	1101010100 (1) 1101010110
42065	1	1100010110 (1) 1000010110
42066	1	1100010110 (1) 1101010110
42067	1	1100010110 (1) 1100110110
42068	1	1100010110 (1) 1100000110
42069	1	1100010110 (1) 1100010010
42070	1	1100010100 (1) 1000010100
42071	1	1100010100 (1) 1101010100
42072	1	1100010100 (1) 1100110100
42073	1	1100010100 (1) 1100000100
42074	1	1100010100 (1) 1100011100
42075	1	1100010100 (1) 1100010000
42076	1	1100010100 (1) 1100010110
42077	1	0101010100 (1) 0001010100
42078	1	0101010100 (1) 0101110100
42079	1	0101010100 (1) 0101000100
42080	1	0101010100 (1) 0101011100
42081	1	0101010100 (1) 0101010000
42082	1	0101010100 (1) 0101010110
42083	1	0100010110 (1) 0000010110
42084	1	0100010110 (1) 0101010110
42085	1	0100010110 (1) 0100110110
42086	1	0100010110 (1) 0100000110
42087	1	0100010110 (1) 0100010010
42088	1	0100010100 (1) 0000010100
42089	1	0100010100 (1) 0101010100
42090	1	0100010100 (1) 0100110100
42091	1	0100010100 (1) 0100000100
42092	1	0100010100 (1) 0100011100
42093	1	0100010100 (1) 0100010000
42094	1	0100010100 (1) 0100010110
42121	1	0101110100 (1) 0001110100
42122	1	0101110100 (1) 0101111100
42123	1	0101110100 (1) 0101110000
42124	1	1101110100 (1) 1001110100
42125	1	1101110100 (1) 1101111100
42126	1	1101110100 (1) 1101110000
42133	1	1001010100 (1) 1001110100
42134	1	1001010100 (1) 1001000100
42135	1	1001010100 (1) 1001011100
42136	1	1001010100 (1) 1001010000
42137	1	1001010100 (1) 1001010110
42139	1	1000010110 (1) 1001010110
42140	1	1000010110 (1) 1000110110
42141	1	1000010110 (1) 1000000110
42142	1	1000010110 (1) 1000010010
42144	1	1000010100 (1) 1001010100
42145	1	1000010100 (1) 1000110100
42146	1	1000010100 (1) 1000000100
42147	1	1000010100 (1) 1000011100
42148	1	1000010100 (1) 1000010000
42149	1	1000010100 (1) 1000010110
42156	1	0001010100 (1) 0001110100
42157	1	0001010100 (1) 0001000100
42158	1	0001010100 (1) 0001011100
42159	1	0001010100 (1) 0001010000
42160	1	0001010100 (1) 0001010110
42162	1	0000010110 (1) 0001010110
42163	1	0000010110 (1) 0000110110
42164	1	0000010110 (1) 0000000110
42165	1	0000010110 (1) 0000010010
42167	1	0000010100 (1) 0001010100
42168	1	0000010100 (1) 0000110100
42169	1	0000010100 (1) 0000000100
42170	1	0000010100 (1) 0000011100
42171	1	0000010100 (1) 0000010000
42172	1	0000010100 (1) 0000010110
42182	1	0001110100 (1) 0001111100
42183	1	0001110100 (1) 0001110000
42184	1	0101100010 (1) 0001100010
42185	1	0101100010 (1) 0101110010
42186	1	0101100010 (1) 0101100000
42196	1	1001110100 (1) 1001111100
42197	1	1001110100 (1) 1001110000
42198	1	1101100010 (1) 1101110010
42199	1	1101100010 (1) 1101100000
42200	1	0101011100 (1) 0001011100
42201	1	0101011100 (1) 0101111100
42202	1	0101011100 (1) 0101001100
42203	1	0101011100 (1) 0101011110
42204	1	0101011010 (1) 0001011010
42205	1	0101011010 (1) 0101111010
42206	1	0101011010 (1) 0101001010
42207	1	0101011010 (1) 0101010010
42208	1	0101011010 (1) 0101011110
42209	1	1101011100 (1) 1001011100
42210	1	1101011100 (1) 1101111100
42211	1	1101011100 (1) 1101001100
42212	1	1101011100 (1) 1101011110
42213	1	1101011010 (1) 1001011010
42214	1	1101011010 (1) 1101111010
42215	1	1101011010 (1) 1101001010
42216	1	1101011010 (1) 1101010010
42217	1	1101011010 (1) 1101011110
42223	1	0001011100 (1) 0001001100
42224	1	0001011100 (1) 0001011110
42225	1	0001011010 (1) 0001001010
42226	1	0001011010 (1) 0001010010
42227	1	0001011010 (1) 0001011110
42233	1	1001011100 (1) 1001001100
42234	1	1001011100 (1) 1001011110
42235	1	1001011010 (1) 1001001010
42236	1	1001011010 (1) 1001010010
42237	1	1001011010 (1) 1001011110
42242	1	0100110100 (1) 0000110100
42243	1	0100110100 (1) 0101110100
42244	1	0100110100 (1) 0100111100
42245	1	0100110100 (1) 0100110000
42255	1	1100110100 (1) 1000110100
42256	1	1100110100 (1) 1101110100
42257	1	1100110100 (1) 1100111100
42258	1	1100110100 (1) 1100110000
42269	1	0000110100 (1) 0001110100
42270	1	0000110100 (1) 0000111100
42271	1	0000110100 (1) 0000110000
42285	1	1000110100 (1) 1001110100
42286	1	1000110100 (1) 1000111100
42287	1	1000110100 (1) 1000110000
42312	1	0100011100 (1) 0000011100
42313	1	0100011100 (1) 0101011100
42314	1	0100011100 (1) 0100001100
42315	1	0100011100 (1) 0100011110
42316	1	0100011010 (1) 0000011010
42317	1	0100011010 (1) 0101011010
42318	1	0100011010 (1) 0100001010
42319	1	0100011010 (1) 0100010010
42320	1	0100011010 (1) 0100011110
42327	1	1100011100 (1) 1000011100
42328	1	1100011100 (1) 1101011100
42329	1	1100011100 (1) 1100001100
42330	1	1100011100 (1) 1100011110
42331	1	1100011010 (1) 1000011010
42332	1	1100011010 (1) 1101011010
42333	1	1100011010 (1) 1100001010
42334	1	1100011010 (1) 1100010010
42335	1	1100011010 (1) 1100011110
42359	1	0000011100 (1) 0001011100
42360	1	0000011100 (1) 0000001100
42361	1	0000011100 (1) 0000011110
42362	1	0000011010 (1) 0001011010
42363	1	0000011010 (1) 0000001010
42364	1	0000011010 (1) 0000010010
42365	1	0000011010 (1) 0000011110
42367	1	1000011100 (1) 1001011100
42368	1	1000011100 (1) 1000001100
42369	1	1000011100 (1) 1000011110
42370	1	1000011010 (1) 1001011010
42371	1	1000011010 (1) 1000001010
42372	1	1000011010 (1) 1000010010
42373	1	1000011010 (1) 1000011110
42374	1	0101100100 (1) 0001100100
42375	1	0101100100 (1) 0101110100
42376	1	0101100100 (1) 0101100000
42377	1	0101000110 (1) 0001000110
42378	1	0101000110 (1) 0101100110
42379	1	0101000110 (1) 0101000010
42380	1	1101100100 (1) 1101110100
42381	1	1101100100 (1) 1101100000
42382	1	1101000110 (1) 1101100110
42383	1	1101000110 (1) 1101000010
42389	1	0001100100 (1) 0001110100
42390	1	0001100100 (1) 0001100000
42392	1	0001000110 (1) 0001100110
42393	1	0001000110 (1) 0001000010
42399	1	1001100100 (1) 1101100100
42401	1	1001100100 (1) 1001110100
42402	1	1001100100 (1) 1001100000
42403	1	1001000110 (1) 1101000110
42405	1	1001000110 (1) 1001100110
42406	1	1001000110 (1) 1001000010
42449	1	0100101000 (1) 0000101000
42450	1	0100101000 (1) 0101101000
42451	1	0100101000 (1) 0100001000
42452	1	0100101000 (1) 0100111000
42453	1	0100101000 (1) 0100100000
42468	1	1100101000 (1) 1101101000
42469	1	1100101000 (1) 1100001000
42470	1	1100101000 (1) 1100111000
42471	1	1100101000 (1) 1100100000
42476	1	1001101000 (1) 1101101000
42478	1	1001101000 (1) 1001001000
42479	1	1001101000 (1) 1001111000
42480	1	1001101000 (1) 1001100000
42481	1	1000101000 (1) 1100101000
42483	1	1000101000 (1) 1001101000
42484	1	1000101000 (1) 1000001000
42485	1	1000101000 (1) 1000111000
42486	1	1000101000 (1) 1000100000
42491	1	0001101000 (1) 0001001000
42492	1	0001101000 (1) 0001111000
42493	1	0001101000 (1) 0001100000
42495	1	0000101000 (1) 0001101000
42496	1	0000101000 (1) 0000001000
42497	1	0000101000 (1) 0000111000
42498	1	0000101000 (1) 0000100000
42499	1	0101111000 (1) 0001111000
42500	1	0101111000 (1) 0101111100
42501	1	1101111000 (1) 1001111000
42502	1	1101111000 (1) 1101111100
42519	1	0101000100 (1) 0001000100
42520	1	0101000100 (1) 0101100100
42521	1	0101000100 (1) 0101000000
42522	1	0101000100 (1) 0101000110
42523	1	0100100100 (1) 0000100100
42524	1	0100100100 (1) 0101100100
42525	1	0100100100 (1) 0100110100
42526	1	0100100100 (1) 0100100000
42527	1	0100000110 (1) 0000000110
42528	1	0100000110 (1) 0101000110
42529	1	0100000110 (1) 0100100110
42530	1	0100000110 (1) 0100000010
42531	1	0100000100 (1) 0000000100
42532	1	0100000100 (1) 0101000100
42533	1	0100000100 (1) 0100100100
42534	1	0100000100 (1) 0100000000
42535	1	0100000100 (1) 0100000110
42537	1	0001111000 (1) 0001011000
42538	1	0001111000 (1) 0001111100
42547	1	1101000100 (1) 1101100100
42548	1	1101000100 (1) 1101000000
42549	1	1101000100 (1) 1101000110
42550	1	1100100100 (1) 1101100100
42551	1	1100100100 (1) 1100110100
42552	1	1100100100 (1) 1100100000
42553	1	1100000110 (1) 1101000110
42554	1	1100000110 (1) 1100100110
42555	1	1100000110 (1) 1100000010
42557	1	1001111000 (1) 1001011000
42558	1	1001111000 (1) 1001111100
42570	1	0001000100 (1) 0001100100
42571	1	0001000100 (1) 0001000000
42572	1	0001000100 (1) 0001000110
42574	1	0000100100 (1) 0001100100
42575	1	0000100100 (1) 0000110100
42576	1	0000100100 (1) 0000100000
42578	1	0000000110 (1) 0001000110
42579	1	0000000110 (1) 0000100110
42580	1	0000000110 (1) 0000000010
42582	1	0000000100 (1) 0001000100
42583	1	0000000100 (1) 0000100100
42584	1	0000000100 (1) 0000000000
42585	1	0000000100 (1) 0000000110
42600	1	1100000100 (1) 1101000100
42601	1	1100000100 (1) 1100100100
42602	1	1100000100 (1) 1100000000
42603	1	1100000100 (1) 1100000110
42608	1	1001000100 (1) 1101000100
42610	1	1001000100 (1) 1001100100
42611	1	1001000100 (1) 1001000000
42612	1	1001000100 (1) 1001000110
42613	1	1000100100 (1) 1100100100
42615	1	1000100100 (1) 1001100100
42616	1	1000100100 (1) 1000110100
42617	1	1000100100 (1) 1000100000
42618	1	1000000110 (1) 1100000110
42620	1	1000000110 (1) 1001000110
42621	1	1000000110 (1) 1000100110
42622	1	1000000110 (1) 1000000010
42623	1	1000000100 (1) 1100000100
42625	1	1000000100 (1) 1001000100
42626	1	1000000100 (1) 1000100100
42627	1	1000000100 (1) 1000000000
42628	1	1000000100 (1) 1000000110
42629	1	0101101000 (1) 0001101000
42630	1	0101101000 (1) 0101111000
42631	1	0101101000 (1) 0101100000
42632	1	0101001010 (1) 0001001010
42633	1	0101001010 (1) 0101101010
42634	1	0101001010 (1) 0101000010
42639	1	1101101000 (1) 1101111000
42640	1	1101101000 (1) 1101100000
42641	1	1101001010 (1) 1101101010
42642	1	1101001010 (1) 1101000010
42649	1	0001001010 (1) 0001000010
42650	1	1001001010 (1) 1101001010
42651	1	1001001010 (1) 1001000010
42654	1	0100111000 (1) 0000111000
42655	1	0100111000 (1) 0101111000
42656	1	0100111000 (1) 0100011000
42657	1	0100111000 (1) 0100111100
42658	1	1100111000 (1) 1000111000
42659	1	1100111000 (1) 1101111000
42660	1	1100111000 (1) 1100011000
42661	1	1100111000 (1) 1100111100
42670	1	0000111000 (1) 0001111000
42671	1	0000111000 (1) 0000011000
42672	1	0000111000 (1) 0000111100
42676	1	1000111000 (1) 1001111000
42677	1	1000111000 (1) 1000011000
42678	1	1000111000 (1) 1000111100
42758	1	0101001000 (1) 0001001000
42759	1	0101001000 (1) 0101101000
42760	1	0101001000 (1) 0101000000
42761	1	0101001000 (1) 0101001010
42762	1	0100001010 (1) 0000001010
42763	1	0100001010 (1) 0101001010
42764	1	0100001010 (1) 0100000010
42765	1	0100001000 (1) 0000001000
42766	1	0100001000 (1) 0101001000
42767	1	0100001000 (1) 0100000000
42768	1	0100001000 (1) 0100001010
42769	1	1101001000 (1) 1101101000
42770	1	1101001000 (1) 1101000000
42771	1	1101001000 (1) 1101001010
42772	1	1100001010 (1) 1101001010
42773	1	1100001010 (1) 1100000010
42774	1	0001001000 (1) 0001000000
42775	1	0001001000 (1) 0001001010
42776	1	0000001010 (1) 0001001010
42777	1	0000001010 (1) 0000000010
42778	1	0000001000 (1) 0001001000
42779	1	0000001000 (1) 0000000000
42780	1	0000001000 (1) 0000001010
42781	1	1100001000 (1) 1101001000
42782	1	1100001000 (1) 1100000000
42783	1	1100001000 (1) 1100001010
42784	1	1001001000 (1) 1101001000
42785	1	1001001000 (1) 1001000000
42786	1	1001001000 (1) 1001001010
42787	1	1000001010 (1) 1100001010
42788	1	1000001010 (1) 1001001010
42789	1	1000001010 (1) 1000000010
42790	1	1000001000 (1) 1100001000
42791	1	1000001000 (1) 1001001000
42792	1	1000001000 (1) 1000000000
42793	1	1000001000 (1) 1000001010
42794	1	0101011000 (1) 0001011000
42795	1	0101011000 (1) 0101111000
42796	1	0101011000 (1) 0101001000
42797	1	0101011000 (1) 0101011100
42798	1	0101011000 (1) 0101011010
42799	1	0101010010 (1) 0001010010
42800	1	0101010010 (1) 0101110010
42801	1	0101010010 (1) 0101000010
42802	1	1101011000 (1) 1001011000
42803	1	1101011000 (1) 1101111000
42804	1	1101011000 (1) 1101001000
42805	1	1101011000 (1) 1101011100
42806	1	1101011000 (1) 1101011010
42807	1	1101010010 (1) 1001010010
42808	1	1101010010 (1) 1101110010
42809	1	1101010010 (1) 1101000010
42810	1	0001011000 (1) 0001001000
42811	1	0001011000 (1) 0001011100
42812	1	0001011000 (1) 0001011010
42813	1	0001010010 (1) 0001000010
42814	1	1001011000 (1) 1001001000
42815	1	1001011000 (1) 1001011100
42816	1	1001011000 (1) 1001011010
42817	1	1001010010 (1) 1001000010
42878	1	0101010000 (1) 0001010000
42879	1	0101010000 (1) 0101110000
42880	1	0101010000 (1) 0101000000
42881	1	0101010000 (1) 0101011000
42882	1	0101010000 (1) 0101010010
42883	1	0100011000 (1) 0000011000
42884	1	0100011000 (1) 0101011000
42885	1	0100011000 (1) 0100001000
42886	1	0100011000 (1) 0100011100
42887	1	0100011000 (1) 0100011010
42888	1	0100010010 (1) 0000010010
42889	1	0100010010 (1) 0101010010
42890	1	0100010010 (1) 0100000010
42891	1	0100010000 (1) 0000010000
42892	1	0100010000 (1) 0101010000
42893	1	0100010000 (1) 0100000000
42894	1	0100010000 (1) 0100011000
42895	1	0100010000 (1) 0100010010
42896	1	0101110000 (1) 0001110000
42897	1	0101110000 (1) 0101111000
42898	1	1101010000 (1) 1001010000
42899	1	1101010000 (1) 1101110000
42900	1	1101010000 (1) 1101000000
42901	1	1101010000 (1) 1101011000
42902	1	1101010000 (1) 1101010010
42903	1	1100011000 (1) 1000011000
42904	1	1100011000 (1) 1101011000
42905	1	1100011000 (1) 1100001000
42906	1	1100011000 (1) 1100011100
42907	1	1100011000 (1) 1100011010
42908	1	1100010010 (1) 1000010010
42909	1	1100010010 (1) 1101010010
42910	1	1100010010 (1) 1100000010
42911	1	1100010000 (1) 1000010000
42912	1	1100010000 (1) 1101010000
42913	1	1100010000 (1) 1100000000
42914	1	1100010000 (1) 1100011000
42915	1	1100010000 (1) 1100010010
42916	1	1101110000 (1) 1001110000
42917	1	1101110000 (1) 1101111000
42918	1	0001010000 (1) 0001000000
42919	1	0001010000 (1) 0001011000
42920	1	0001010000 (1) 0001010010
42921	1	0000011000 (1) 0001011000
42922	1	0000011000 (1) 0000001000
42923	1	0000011000 (1) 0000011100
42924	1	0000011000 (1) 0000011010
42925	1	0000010010 (1) 0001010010
42926	1	0000010010 (1) 0000000010
42927	1	0000010000 (1) 0001010000
42928	1	0000010000 (1) 0000000000
42929	1	0000010000 (1) 0000011000
42930	1	0000010000 (1) 0000010010
42935	1	0001110000 (1) 0001010000
42936	1	0001110000 (1) 0001111000
42937	1	1001010000 (1) 1001000000
42938	1	1001010000 (1) 1001011000
42939	1	1001010000 (1) 1001010010
42940	1	1000011000 (1) 1001011000
42941	1	1000011000 (1) 1000001000
42942	1	1000011000 (1) 1000011100
42943	1	1000011000 (1) 1000011010
42944	1	1000010010 (1) 1001010010
42945	1	1000010010 (1) 1000000010
42946	1	1000010000 (1) 1001010000
42947	1	1000010000 (1) 1000000000
42948	1	1000010000 (1) 1000011000
42949	1	1000010000 (1) 1000010010
42955	1	1001110000 (1) 1001010000
42956	1	1001110000 (1) 1001111000
42976	1	0100110000 (1) 0000110000
42977	1	0100110000 (1) 0101110000
42978	1	0100110000 (1) 0100010000
42979	1	0100110000 (1) 0100111000
42980	1	0100100000 (1) 0000100000
42981	1	0100100000 (1) 0101100000
42982	1	0100100000 (1) 0100000000
42983	1	0100100000 (1) 0100110000
42984	1	1100110000 (1) 1000110000
42985	1	1100110000 (1) 1101110000
42986	1	1100110000 (1) 1100010000
42987	1	1100110000 (1) 1100111000
42991	1	0001100000 (1) 0001000000
42992	1	0001100000 (1) 0001110000
42994	1	0000110000 (1) 0001110000
42995	1	0000110000 (1) 0000010000
42996	1	0000110000 (1) 0000111000
42998	1	0000100000 (1) 0001100000
42999	1	0000100000 (1) 0000000000
43000	1	0000100000 (1) 0000110000
43001	1	1100100000 (1) 1101100000
43002	1	1100100000 (1) 1100000000
43003	1	1100100000 (1) 1100110000
43007	1	1001100000 (1) 1101100000
43009	1	1001100000 (1) 1001000000
43010	1	1001100000 (1) 1001110000
43012	1	1000110000 (1) 1001110000
43013	1	1000110000 (1) 1000010000
43014	1	1000110000 (1) 1000111000
43015	1	1000100000 (1) 1100100000
43017	1	1000100000 (1) 1001100000
43018	1	1000100000 (1) 1000000000
43019	1	1000100000 (1) 1000110000
43055	1	0101100000 (1) 0001100000
43056	1	0101100000 (1) 0101110000
43057	1	0101000010 (1) 0001000010
43058	1	0101000010 (1) 0101100010
43059	1	1101100000 (1) 1101110000
43060	1	1101000010 (1) 1101100010
43061	1	1001000010 (1) 1101000010
43078	1	0101000000 (1) 0001000000
43079	1	0101000000 (1) 0101100000
43080	1	0101000000 (1) 0101000010
43081	1	0100000010 (1) 0000000010
43082	1	0100000010 (1) 0101000010
43083	1	0100000000 (1) 0000000000
43084	1	0100000000 (1) 0101000000
43085	1	0100000000 (1) 0100000010
43086	1	1101000000 (1) 1101100000
43087	1	1101000000 (1) 1101000010
43088	1	1100000010 (1) 1101000010
43089	1	1100000000 (1) 1101000000
43090	1	1100000000 (1) 1100000010
43091	1	1001000000 (1) 1101000000
43092	1	1001000000 (1) 1001000010
43093	1	1000000010 (1) 1100000010
43094	1	1000000010 (1) 1001000010
43095	1	1000000000 (1) 1100000000
43096	1	1000000000 (1) 1001000000
43097	1	1000000000 (1) 1000000010
43098	1	0001000000 (1) 0001000010
43099	1	0000000010 (1) 0001000010
43100	1	0000000000 (1) 0001000000
43101	1	0000000000 (1) 0000000010
39024	1	0101111111 (1) 0001111111
39025	1	0101111111 (1) 0101110111
39026	1	0101111111 (1) 0101111101
39027	1	1101111111 (1) 1001111111
39028	1	1101111111 (1) 1101110111
39029	1	1101111111 (1) 1101111101
39031	1	0001111111 (1) 0001011111
39032	1	0001111111 (1) 0001110111
39033	1	0001111111 (1) 0001111101
39035	1	1001111111 (1) 1001011111
39036	1	1001111111 (1) 1001110111
39037	1	1001111111 (1) 1001111101
39054	1	0100111111 (1) 0000111111
39055	1	0100111111 (1) 0101111111
39056	1	0100111111 (1) 0100011111
39057	1	0100111111 (1) 0100110111
39058	1	0100111111 (1) 0100111101
39059	1	1100111111 (1) 1000111111
39060	1	1100111111 (1) 1101111111
39061	1	1100111111 (1) 1100011111
39062	1	1100111111 (1) 1100110111
39063	1	1100111111 (1) 1100111101
39065	1	0000111111 (1) 0001111111
39066	1	0000111111 (1) 0000011111
39067	1	0000111111 (1) 0000110111
39068	1	0000111111 (1) 0000111101
39070	1	1000111111 (1) 1001111111
39071	1	1000111111 (1) 1000011111
39072	1	1000111111 (1) 1000110111
39073	1	1000111111 (1) 1000111101
39118	1	0101111011 (1) 0001111011
39119	1	0101111011 (1) 0101110011
39120	1	0101111011 (1) 0101111111
39121	1	0101111011 (1) 0101111001
39122	1	0101101111 (1) 0001101111
39123	1	0101101111 (1) 0101111111
39124	1	0101101111 (1) 0101100111
39125	1	0101101111 (1) 0101101101
39126	1	1101111011 (1) 1001111011
39127	1	1101111011 (1) 1101110011
39128	1	1101111011 (1) 1101111111
39129	1	1101111011 (1) 1101111001
39130	1	1101101111 (1) 1101111111
39131	1	1101101111 (1) 1101100111
39132	1	1101101111 (1) 1101101101
39141	1	1001111011 (1) 1001011011
39142	1	1001111011 (1) 1001110011
39143	1	1001111011 (1) 1001111111
39144	1	1001111011 (1) 1001111001
39145	1	1001101111 (1) 1101101111
39147	1	1001101111 (1) 1001001111
39148	1	1001101111 (1) 1001111111
39149	1	1001101111 (1) 1001100111
39150	1	1001101111 (1) 1001101101
39158	1	0001111011 (1) 0001011011
39159	1	0001111011 (1) 0001110011
39160	1	0001111011 (1) 0001111111
39161	1	0001111011 (1) 0001111001
39163	1	0001101111 (1) 0001001111
39164	1	0001101111 (1) 0001111111
39165	1	0001101111 (1) 0001100111
39166	1	0001101111 (1) 0001101101
39238	1	0101011111 (1) 0001011111
39239	1	0101011111 (1) 0101111111
39240	1	0101011111 (1) 0101001111
39241	1	0101011111 (1) 0101010111
39242	1	1101011111 (1) 1001011111
39243	1	1101011111 (1) 1101111111
39244	1	1101011111 (1) 1101001111
39245	1	1101011111 (1) 1101010111
39255	1	1001011111 (1) 1001001111
39256	1	1001011111 (1) 1001010111
39258	1	0001011111 (1) 0001001111
39259	1	0001011111 (1) 0001010111
39264	1	0100111011 (1) 0000111011
39265	1	0100111011 (1) 0101111011
39266	1	0100111011 (1) 0100011011
39267	1	0100111011 (1) 0100110011
39268	1	0100111011 (1) 0100111111
39269	1	0100111011 (1) 0100111001
39270	1	0100101111 (1) 0000101111
39271	1	0100101111 (1) 0101101111
39272	1	0100101111 (1) 0100001111
39273	1	0100101111 (1) 0100111111
39274	1	0100101111 (1) 0100100111
39275	1	0100101111 (1) 0100101101
39276	1	0100101011 (1) 0000101011
39277	1	0100101011 (1) 0101101011
39278	1	0100101011 (1) 0100001011
39279	1	0100101011 (1) 0100111011
39280	1	0100101011 (1) 0100100011
39281	1	0100101011 (1) 0100101111
39282	1	0100101011 (1) 0100101001
39283	1	1100111011 (1) 1000111011
39284	1	1100111011 (1) 1101111011
39285	1	1100111011 (1) 1100011011
39286	1	1100111011 (1) 1100110011
39287	1	1100111011 (1) 1100111111
39288	1	1100111011 (1) 1100111001
39289	1	1100101111 (1) 1101101111
39290	1	1100101111 (1) 1100001111
39291	1	1100101111 (1) 1100111111
39292	1	1100101111 (1) 1100100111
39293	1	1100101111 (1) 1100101101
39294	1	1100101011 (1) 1101101011
39295	1	1100101011 (1) 1100001011
39296	1	1100101011 (1) 1100111011
39297	1	1100101011 (1) 1100100011
39298	1	1100101011 (1) 1100101111
39299	1	1100101011 (1) 1100101001
39306	1	1001101011 (1) 1101101011
39308	1	1001101011 (1) 1001001011
39309	1	1001101011 (1) 1001111011
39310	1	1001101011 (1) 1001100011
39311	1	1001101011 (1) 1001101111
39312	1	1001101011 (1) 1001101001
39314	1	1000111011 (1) 1001111011
39315	1	1000111011 (1) 1000011011
39316	1	1000111011 (1) 1000110011
39317	1	1000111011 (1) 1000111111
39318	1	1000111011 (1) 1000111001
39319	1	1000101111 (1) 1100101111
39321	1	1000101111 (1) 1001101111
39322	1	1000101111 (1) 1000001111
39323	1	1000101111 (1) 1000111111
39324	1	1000101111 (1) 1000100111
39325	1	1000101111 (1) 1000101101
39326	1	1000101011 (1) 1100101011
39328	1	1000101011 (1) 1001101011
39329	1	1000101011 (1) 1000001011
39330	1	1000101011 (1) 1000111011
39331	1	1000101011 (1) 1000100011
39332	1	1000101011 (1) 1000101111
39333	1	1000101011 (1) 1000101001
39340	1	0001101011 (1) 0001001011
39341	1	0001101011 (1) 0001111011
39342	1	0001101011 (1) 0001100011
39343	1	0001101011 (1) 0001101111
39344	1	0001101011 (1) 0001101001
39346	1	0000111011 (1) 0001111011
39347	1	0000111011 (1) 0000011011
39348	1	0000111011 (1) 0000110011
39349	1	0000111011 (1) 0000111111
39350	1	0000111011 (1) 0000111001
39352	1	0000101111 (1) 0001101111
39353	1	0000101111 (1) 0000001111
39354	1	0000101111 (1) 0000111111
39355	1	0000101111 (1) 0000100111
39356	1	0000101111 (1) 0000101101
39358	1	0000101011 (1) 0001101011
39359	1	0000101011 (1) 0000001011
39360	1	0000101011 (1) 0000111011
39361	1	0000101011 (1) 0000100011
39362	1	0000101011 (1) 0000101111
39363	1	0000101011 (1) 0000101001
39368	1	0101110111 (1) 0001110111
39369	1	0101110111 (1) 0101110101
39370	1	1101110111 (1) 1001110111
39371	1	1101110111 (1) 1101110101
39383	1	1001110111 (1) 1001110101
39392	1	0001110111 (1) 0001110101
39397	1	0100011111 (1) 0000011111
39398	1	0100011111 (1) 0101011111
39399	1	0100011111 (1) 0100001111
39400	1	0100011111 (1) 0100010111
39401	1	1100011111 (1) 1000011111
39402	1	1100011111 (1) 1101011111
39403	1	1100011111 (1) 1100001111
39404	1	1100011111 (1) 1100010111
39408	1	0101101011 (1) 0001101011
39409	1	0101101011 (1) 0101111011
39410	1	0101101011 (1) 0101100011
39411	1	0101101011 (1) 0101101111
39412	1	0101101011 (1) 0101101001
39416	1	1101101011 (1) 1101111011
39417	1	1101101011 (1) 1101100011
39418	1	1101101011 (1) 1101101111
39419	1	1101101011 (1) 1101101001
39421	1	1000011111 (1) 1001011111
39422	1	1000011111 (1) 1000001111
39423	1	1000011111 (1) 1000010111
39425	1	0000011111 (1) 0001011111
39426	1	0000011111 (1) 0000001111
39427	1	0000011111 (1) 0000010111
39430	1	0100110111 (1) 0000110111
39431	1	0100110111 (1) 0101110111
39432	1	0100110111 (1) 0100110101
39433	1	1100110111 (1) 1000110111
39434	1	1100110111 (1) 1101110111
39435	1	1100110111 (1) 1100110101
39437	1	0000110111 (1) 0001110111
39438	1	0000110111 (1) 0000110101
39440	1	1000110111 (1) 1001110111
39441	1	1000110111 (1) 1000110101
39456	1	0101001111 (1) 0001001111
39457	1	0101001111 (1) 0101101111
39458	1	0101001111 (1) 0101000111
39459	1	1101001111 (1) 1101101111
39460	1	1101001111 (1) 1101000111
39470	1	1001001111 (1) 1101001111
39472	1	1001001111 (1) 1001000111
39474	1	0001001111 (1) 0001000111
39524	1	0101110011 (1) 0001110011
39525	1	0101110011 (1) 0101110111
39526	1	0101110011 (1) 0101110001
39527	1	0101100111 (1) 0001100111
39528	1	0101100111 (1) 0101110111
39529	1	0101100111 (1) 0101100101
39532	1	1101110011 (1) 1001110011
39533	1	1101110011 (1) 1101110111
39534	1	1101110011 (1) 1101110001
39535	1	1101100111 (1) 1101110111
39536	1	1101100111 (1) 1101100101
39546	1	1001110011 (1) 1001010011
39547	1	1001110011 (1) 1001110111
39548	1	1001110011 (1) 1001110001
39549	1	1001100111 (1) 1101100111
39551	1	1001100111 (1) 1001110111
39552	1	1001100111 (1) 1001100101
39559	1	0001110011 (1) 0001010011
39560	1	0001110011 (1) 0001110111
39561	1	0001110011 (1) 0001110001
39563	1	0001100111 (1) 0001110111
39564	1	0001100111 (1) 0001100101
39594	1	0101111101 (1) 0001111101
39598	1	1101111101 (1) 1001111101
39600	1	0001111101 (1) 0001011101
39601	1	0100001111 (1) 0000001111
39602	1	0100001111 (1) 0101001111
39603	1	0100001111 (1) 0100000111
39605	1	1001111101 (1) 1001011101
39606	1	1100001111 (1) 1101001111
39607	1	1100001111 (1) 1100000111
39631	1	1000001111 (1) 1100001111
39633	1	1000001111 (1) 1001001111
39634	1	1000001111 (1) 1000000111
39636	1	0000001111 (1) 0001001111
39637	1	0000001111 (1) 0000000111
39638	1	0100101110 (1) 0000101110
39639	1	0100101110 (1) 0101101110
39640	1	0100101110 (1) 0100001110
39641	1	0100101110 (1) 0100111110
39642	1	0100101110 (1) 0100100110
39643	1	0100101110 (1) 0100101010
39644	1	0100101110 (1) 0100101100
39656	1	0101010111 (1) 0001010111
39657	1	0101010111 (1) 0101110111
39658	1	0101010111 (1) 0101000111
39664	1	1101010111 (1) 1001010111
39665	1	1101010111 (1) 1101110111
39666	1	1101010111 (1) 1101000111
39667	1	1100101110 (1) 1101101110
39668	1	1100101110 (1) 1100001110
39669	1	1100101110 (1) 1100111110
39670	1	1100101110 (1) 1100100110
39671	1	1100101110 (1) 1100101010
39672	1	1100101110 (1) 1100101100
39679	1	1001101110 (1) 1101101110
39681	1	1001101110 (1) 1001001110
39682	1	1001101110 (1) 1001111110
39683	1	1001101110 (1) 1001100110
39684	1	1001101110 (1) 1001101010
39685	1	1001101110 (1) 1001101100
39686	1	1000101110 (1) 1100101110
39688	1	1000101110 (1) 1001101110
39689	1	1000101110 (1) 1000001110
39690	1	1000101110 (1) 1000111110
39691	1	1000101110 (1) 1000100110
39692	1	1000101110 (1) 1000101010
39693	1	1000101110 (1) 1000101100
39700	1	0001101110 (1) 0001001110
39701	1	0001101110 (1) 0001111110
39702	1	0001101110 (1) 0001100110
39703	1	0001101110 (1) 0001101010
39704	1	0001101110 (1) 0001101100
39706	1	0000101110 (1) 0001101110
39707	1	0000101110 (1) 0000001110
39708	1	0000101110 (1) 0000111110
39709	1	0000101110 (1) 0000100110
39710	1	0000101110 (1) 0000101010
39711	1	0000101110 (1) 0000101100
39713	1	0001010111 (1) 0001110111
39714	1	0001010111 (1) 0001000111
39716	1	1001010111 (1) 1001110111
39717	1	1001010111 (1) 1001000111
39737	1	0100110011 (1) 0000110011
39738	1	0100110011 (1) 0101110011
39739	1	0100110011 (1) 0100010011
39740	1	0100110011 (1) 0100110111
39741	1	0100110011 (1) 0100110001
39742	1	0100100111 (1) 0000100111
39743	1	0100100111 (1) 0101100111
39744	1	0100100111 (1) 0100110111
39745	1	0100100111 (1) 0100100101
39746	1	0100100011 (1) 0000100011
39747	1	0100100011 (1) 0101100011
39748	1	0100100011 (1) 0100000011
39749	1	0100100011 (1) 0100110011
39750	1	0100100011 (1) 0100100111
39751	1	0100100011 (1) 0100100001
39753	1	1100110011 (1) 1000110011
39754	1	1100110011 (1) 1101110011
39755	1	1100110011 (1) 1100010011
39756	1	1100110011 (1) 1100110111
39757	1	1100110011 (1) 1100110001
39758	1	1100100111 (1) 1101100111
39759	1	1100100111 (1) 1100110111
39760	1	1100100111 (1) 1100100101
39762	1	1100100011 (1) 1101100011
39763	1	1100100011 (1) 1100000011
39764	1	1100100011 (1) 1100110011
39765	1	1100100011 (1) 1100100111
39766	1	1100100011 (1) 1100100001
39772	1	1001100011 (1) 1101100011
39774	1	1001100011 (1) 1001000011
39775	1	1001100011 (1) 1001110011
39776	1	1001100011 (1) 1001100111
39777	1	1001100011 (1) 1001100001
39779	1	1000110011 (1) 1001110011
39780	1	1000110011 (1) 1000010011
39781	1	1000110011 (1) 1000110111
39782	1	1000110011 (1) 1000110001
39783	1	1000100111 (1) 1100100111
39785	1	1000100111 (1) 1001100111
39786	1	1000100111 (1) 1000110111
39787	1	1000100111 (1) 1000100101
39788	1	1000100011 (1) 1100100011
39790	1	1000100011 (1) 1001100011
39791	1	1000100011 (1) 1000000011
39792	1	1000100011 (1) 1000110011
39793	1	1000100011 (1) 1000100111
39794	1	1000100011 (1) 1000100001
39800	1	0001100011 (1) 0001000011
39801	1	0001100011 (1) 0001110011
39802	1	0001100011 (1) 0001100111
39803	1	0001100011 (1) 0001100001
39805	1	0000110011 (1) 0001110011
39806	1	0000110011 (1) 0000010011
39807	1	0000110011 (1) 0000110111
39808	1	0000110011 (1) 0000110001
39810	1	0000100111 (1) 0001100111
39811	1	0000100111 (1) 0000110111
39812	1	0000100111 (1) 0000100101
39814	1	0000100011 (1) 0001100011
39815	1	0000100011 (1) 0000000011
39816	1	0000100011 (1) 0000110011
39817	1	0000100011 (1) 0000100111
39818	1	0000100011 (1) 0000100001
39827	1	1100111101 (1) 1000111101
39828	1	1100111101 (1) 1101111101
39829	1	1100111101 (1) 1100011101
39843	1	0100111101 (1) 0000111101
39844	1	0100111101 (1) 0101111101
39845	1	0100111101 (1) 0100011101
39848	1	0101101110 (1) 0001101110
39849	1	0101101110 (1) 0101111110
39850	1	0101101110 (1) 0101100110
39851	1	0101101110 (1) 0101101010
39852	1	0101101110 (1) 0101101100
39853	1	1101101110 (1) 1101111110
39854	1	1101101110 (1) 1101100110
39855	1	1101101110 (1) 1101101010
39856	1	1101101110 (1) 1101101100
39858	1	0000111101 (1) 0001111101
39859	1	0000111101 (1) 0000011101
39861	1	1000111101 (1) 1001111101
39862	1	1000111101 (1) 1000011101
39889	1	0100010111 (1) 0000010111
39890	1	0100010111 (1) 0101010111
39891	1	0100010111 (1) 0100110111
39892	1	0100010111 (1) 0100000111
39893	1	1100010111 (1) 1000010111
39894	1	1100010111 (1) 1101010111
39895	1	1100010111 (1) 1100110111
39896	1	1100010111 (1) 1100000111
39898	1	1000010111 (1) 1001010111
39899	1	1000010111 (1) 1000110111
39900	1	1000010111 (1) 1000000111
39923	1	0000010111 (1) 0001010111
39924	1	0000010111 (1) 0000110111
39925	1	0000010111 (1) 0000000111
39926	1	0101100011 (1) 0001100011
39927	1	0101100011 (1) 0101110011
39928	1	0101100011 (1) 0101100111
39929	1	0101100011 (1) 0101100001
39935	1	1101100011 (1) 1101110011
39936	1	1101100011 (1) 1101100111
39937	1	1101100011 (1) 1101100001
39946	1	0101011101 (1) 0001011101
39947	1	0101011101 (1) 0101111101
39948	1	0101011101 (1) 0101001101
39949	1	0101011101 (1) 0101011111
39950	1	0101011011 (1) 0001011011
39951	1	0101011011 (1) 0101111011
39952	1	0101011011 (1) 0101001011
39953	1	0101011011 (1) 0101010011
39954	1	0101011011 (1) 0101011111
39955	1	1101011101 (1) 1001011101
39956	1	1101011101 (1) 1101111101
39957	1	1101011101 (1) 1101001101
39958	1	1101011101 (1) 1101011111
39959	1	1101011011 (1) 1001011011
39960	1	1101011011 (1) 1101111011
39961	1	1101011011 (1) 1101001011
39962	1	1101011011 (1) 1101010011
39963	1	1101011011 (1) 1101011111
39965	1	0001011101 (1) 0001001101
39966	1	0001011101 (1) 0001011111
39967	1	0001011011 (1) 0001001011
39968	1	0001011011 (1) 0001010011
39969	1	0001011011 (1) 0001011111
39971	1	1001011101 (1) 1001001101
39972	1	1001011101 (1) 1001011111
39973	1	1001011011 (1) 1001001011
39974	1	1001011011 (1) 1001010011
39975	1	1001011011 (1) 1001011111
39976	1	0101111110 (1) 0001111110
39977	1	0101111110 (1) 0101110110
39978	1	0101111110 (1) 0101111100
39979	1	1101111110 (1) 1001111110
39980	1	1101111110 (1) 1101110110
39981	1	1101111110 (1) 1101111100
39983	1	0001111110 (1) 0001011110
39984	1	0001111110 (1) 0001110110
39985	1	0001111110 (1) 0001111100
39987	1	1001111110 (1) 1001011110
39988	1	1001111110 (1) 1001110110
39989	1	1001111110 (1) 1001111100
40061	1	0101101101 (1) 0001101101
40062	1	0101101101 (1) 0101111101
40063	1	0101101101 (1) 0101100101
40064	1	1100011101 (1) 1000011101
40065	1	1100011101 (1) 1101011101
40066	1	1100011101 (1) 1100001101
40067	1	1100011101 (1) 1100011111
40068	1	1100011011 (1) 1000011011
40069	1	1100011011 (1) 1101011011
40070	1	1100011011 (1) 1100001011
40071	1	1100011011 (1) 1100010011
40072	1	1100011011 (1) 1100011111
40073	1	0100011101 (1) 0000011101
40074	1	0100011101 (1) 0101011101
40075	1	0100011101 (1) 0100001101
40076	1	0100011101 (1) 0100011111
40077	1	0100011011 (1) 0000011011
40078	1	0100011011 (1) 0101011011
40079	1	0100011011 (1) 0100001011
40080	1	0100011011 (1) 0100010011
40081	1	0100011011 (1) 0100011111
40082	1	1101101101 (1) 1101111101
40083	1	1101101101 (1) 1101100101
40105	1	0001101101 (1) 0001001101
40106	1	0001101101 (1) 0001111101
40107	1	0001101101 (1) 0001100101
40114	1	1001101101 (1) 1101101101
40116	1	1001101101 (1) 1001001101
40117	1	1001101101 (1) 1001111101
40118	1	1001101101 (1) 1001100101
40120	1	0000011101 (1) 0001011101
40121	1	0000011101 (1) 0000001101
40122	1	0000011101 (1) 0000011111
40123	1	0000011011 (1) 0001011011
40124	1	0000011011 (1) 0000001011
40125	1	0000011011 (1) 0000010011
40126	1	0000011011 (1) 0000011111
40128	1	1000011101 (1) 1001011101
40129	1	1000011101 (1) 1000001101
40130	1	1000011101 (1) 1000011111
40131	1	1000011011 (1) 1001011011
40132	1	1000011011 (1) 1000001011
40133	1	1000011011 (1) 1000010011
40134	1	1000011011 (1) 1000011111
40138	1	1100111110 (1) 1000111110
40139	1	1100111110 (1) 1101111110
40140	1	1100111110 (1) 1100011110
40141	1	1100111110 (1) 1100110110
40142	1	1100111110 (1) 1100111100
40146	1	0100111110 (1) 0000111110
40147	1	0100111110 (1) 0101111110
40148	1	0100111110 (1) 0100011110
40149	1	0100111110 (1) 0100110110
40150	1	0100111110 (1) 0100111100
40152	1	0000111110 (1) 0001111110
40153	1	0000111110 (1) 0000011110
40154	1	0000111110 (1) 0000110110
40155	1	0000111110 (1) 0000111100
40157	1	1000111110 (1) 1001111110
40158	1	1000111110 (1) 1000011110
40159	1	1000111110 (1) 1000110110
40160	1	1000111110 (1) 1000111100
40161	1	0101000111 (1) 0001000111
40162	1	0101000111 (1) 0101100111
40163	1	1101000111 (1) 1101100111
40164	1	1001000111 (1) 1101000111
40166	1	1001000111 (1) 1001100111
40168	1	0001000111 (1) 0001100111
40169	1	0101110110 (1) 0001110110
40170	1	0101110110 (1) 0101110010
40171	1	0101110110 (1) 0101110100
40172	1	1101110110 (1) 1001110110
40173	1	1101110110 (1) 1101110010
40174	1	1101110110 (1) 1101110100
40191	1	0001110110 (1) 0001110010
40192	1	0001110110 (1) 0001110100
40194	1	1001110110 (1) 1001110010
40195	1	1001110110 (1) 1001110100
40239	1	0100101101 (1) 0000101101
40240	1	0100101101 (1) 0101101101
40241	1	0100101101 (1) 0100001101
40242	1	0100101101 (1) 0100111101
40243	1	0100101101 (1) 0100100101
40244	1	0100101001 (1) 0000101001
40245	1	0100101001 (1) 0101101001
40246	1	0100101001 (1) 0100001001
40247	1	0100101001 (1) 0100111001
40248	1	0100101001 (1) 0100100001
40249	1	0100101001 (1) 0100101101
40250	1	1100101101 (1) 1101101101
40251	1	1100101101 (1) 1100001101
40252	1	1100101101 (1) 1100111101
40253	1	1100101101 (1) 1100100101
40265	1	1100101001 (1) 1101101001
40266	1	1100101001 (1) 1100001001
40267	1	1100101001 (1) 1100111001
40268	1	1100101001 (1) 1100100001
40269	1	1100101001 (1) 1100101101
40275	1	1001101001 (1) 1101101001
40277	1	1001101001 (1) 1001001001
40278	1	1001101001 (1) 1001111001
40279	1	1001101001 (1) 1001100001
40280	1	1001101001 (1) 1001101101
40281	1	1000101101 (1) 1100101101
40283	1	1000101101 (1) 1001101101
40284	1	1000101101 (1) 1000001101
40285	1	1000101101 (1) 1000111101
40286	1	1000101101 (1) 1000100101
40287	1	1000101001 (1) 1100101001
40289	1	1000101001 (1) 1001101001
40290	1	1000101001 (1) 1000001001
40291	1	1000101001 (1) 1000111001
40292	1	1000101001 (1) 1000100001
40293	1	1000101001 (1) 1000101101
40299	1	0001101001 (1) 0001001001
40300	1	0001101001 (1) 0001111001
40301	1	0001101001 (1) 0001100001
40302	1	0001101001 (1) 0001101101
40304	1	0000101101 (1) 0001101101
40305	1	0000101101 (1) 0000001101
40306	1	0000101101 (1) 0000111101
40307	1	0000101101 (1) 0000100101
40309	1	0000101001 (1) 0001101001
40310	1	0000101001 (1) 0000001001
40311	1	0000101001 (1) 0000111001
40312	1	0000101001 (1) 0000100001
40313	1	0000101001 (1) 0000101101
40318	1	0101111001 (1) 0001111001
40319	1	0101111001 (1) 0101111101
40320	1	0101110101 (1) 0001110101
40321	1	0101110101 (1) 0101111101
40322	1	1101111001 (1) 1001111001
40323	1	1101111001 (1) 1101111101
40324	1	1101110101 (1) 1001110101
40325	1	1101110101 (1) 1101111101
40352	1	0001111001 (1) 0001011001
40353	1	0001111001 (1) 0001111101
40355	1	0001110101 (1) 0001111101
40356	1	0100000111 (1) 0000000111
40357	1	0100000111 (1) 0101000111
40358	1	0100000111 (1) 0100100111
40375	1	1001111001 (1) 1001011001
40376	1	1001111001 (1) 1001111101
40378	1	1001110101 (1) 1001111101
40379	1	1100000111 (1) 1101000111
40380	1	1100000111 (1) 1100100111
40382	1	0000000111 (1) 0001000111
40383	1	0000000111 (1) 0000100111
40390	1	0100110110 (1) 0000110110
40391	1	0100110110 (1) 0101110110
40392	1	0100110110 (1) 0100110010
40393	1	0100110110 (1) 0100110100
40427	1	1000000111 (1) 1100000111
40429	1	1000000111 (1) 1001000111
40430	1	1000000111 (1) 1000100111
40437	1	1100110110 (1) 1000110110
40438	1	1100110110 (1) 1101110110
40439	1	1100110110 (1) 1100110010
40440	1	1100110110 (1) 1100110100
40452	1	0000110110 (1) 0001110110
40453	1	0000110110 (1) 0000110010
40454	1	0000110110 (1) 0000110100
40456	1	1000110110 (1) 1001110110
40457	1	1000110110 (1) 1000110010
40458	1	1000110110 (1) 1000110100
40466	1	0101101001 (1) 0001101001
40467	1	0101101001 (1) 0101111001
40468	1	0101101001 (1) 0101100001
40469	1	0101101001 (1) 0101101101
40470	1	0101001101 (1) 0001001101
40471	1	0101001101 (1) 0101101101
40472	1	0101001101 (1) 0101000101
40473	1	0101001101 (1) 0101001111
40474	1	0101001011 (1) 0001001011
40475	1	0101001011 (1) 0101101011
40476	1	0101001011 (1) 0101000011
40477	1	0101001011 (1) 0101001111
40485	1	1101101001 (1) 1101111001
40486	1	1101101001 (1) 1101100001
40487	1	1101101001 (1) 1101101101
40488	1	1101001101 (1) 1101101101
40489	1	1101001101 (1) 1101000101
40490	1	1101001101 (1) 1101001111
40491	1	1101001011 (1) 1101101011
40492	1	1101001011 (1) 1101000011
40493	1	1101001011 (1) 1101001111
40505	1	1001001101 (1) 1101001101
40507	1	1001001101 (1) 1001000101
40508	1	1001001101 (1) 1001001111
40509	1	1001001011 (1) 1101001011
40510	1	1001001011 (1) 1001000011
40511	1	1001001011 (1) 1001001111
40512	1	0101111010 (1) 0001111010
40513	1	0101111010 (1) 0101110010
40514	1	0101111010 (1) 0101111110
40515	1	0101111010 (1) 0101111000
40529	1	0001001101 (1) 0001000101
40530	1	0001001101 (1) 0001001111
40531	1	0001001011 (1) 0001000011
40532	1	0001001011 (1) 0001001111
40536	1	1101111010 (1) 1001111010
40537	1	1101111010 (1) 1101110010
40538	1	1101111010 (1) 1101111110
40539	1	1101111010 (1) 1101111000
40547	1	1001111010 (1) 1001011010
40548	1	1001111010 (1) 1001110010
40549	1	1001111010 (1) 1001111110
40550	1	1001111010 (1) 1001111000
40557	1	0001111010 (1) 0001011010
40558	1	0001111010 (1) 0001110010
40559	1	0001111010 (1) 0001111110
40560	1	0001111010 (1) 0001111000
40573	1	0100111001 (1) 0000111001
40574	1	0100111001 (1) 0101111001
40575	1	0100111001 (1) 0100011001
40576	1	0100111001 (1) 0100111101
40577	1	0100110101 (1) 0000110101
40578	1	0100110101 (1) 0101110101
40579	1	0100110101 (1) 0100111101
40580	1	1100111001 (1) 1000111001
40581	1	1100111001 (1) 1101111001
40582	1	1100111001 (1) 1100011001
40583	1	1100111001 (1) 1100111101
40584	1	1100110101 (1) 1000110101
40585	1	1100110101 (1) 1101110101
40586	1	1100110101 (1) 1100111101
40587	1	0101100110 (1) 0001100110
40588	1	0101100110 (1) 0101110110
40589	1	0101100110 (1) 0101100010
40590	1	0101100110 (1) 0101100100
40594	1	1101100110 (1) 1101110110
40595	1	1101100110 (1) 1101100010
40596	1	1101100110 (1) 1101100100
40601	1	0000111001 (1) 0001111001
40602	1	0000111001 (1) 0000011001
40603	1	0000111001 (1) 0000111101
40605	1	0000110101 (1) 0001110101
40606	1	0000110101 (1) 0000111101
40621	1	1000111001 (1) 1001111001
40622	1	1000111001 (1) 1000011001
40623	1	1000111001 (1) 1000111101
40625	1	1000110101 (1) 1001110101
40626	1	1000110101 (1) 1000111101
40634	1	0001100110 (1) 0001110110
40635	1	0001100110 (1) 0001100010
40636	1	0001100110 (1) 0001100100
40637	1	1001100110 (1) 1101100110
40639	1	1001100110 (1) 1001110110
40640	1	1001100110 (1) 1001100010
40641	1	1001100110 (1) 1001100100
40750	1	0101011110 (1) 0001011110
40751	1	0101011110 (1) 0101111110
40752	1	0101011110 (1) 0101001110
40753	1	0101011110 (1) 0101010110
40758	1	1101011110 (1) 1001011110
40759	1	1101011110 (1) 1101111110
40760	1	1101011110 (1) 1101001110
40761	1	1101011110 (1) 1101010110
40803	1	0001011110 (1) 0001001110
40804	1	0001011110 (1) 0001010110
40806	1	1001011110 (1) 1001001110
40807	1	1001011110 (1) 1001010110
40808	1	0101001001 (1) 0001001001
40809	1	0101001001 (1) 0101101001
40810	1	0101001001 (1) 0101000001
40811	1	0101001001 (1) 0101001101
40812	1	0101001001 (1) 0101001011
40813	1	0100001101 (1) 0000001101
40814	1	0100001101 (1) 0101001101
40815	1	0100001101 (1) 0100000101
40816	1	0100001101 (1) 0100001111
40817	1	0100001011 (1) 0000001011
40818	1	0100001011 (1) 0101001011
40819	1	0100001011 (1) 0100000011
40820	1	0100001011 (1) 0100001111
40821	1	0100001001 (1) 0000001001
40822	1	0100001001 (1) 0101001001
40823	1	0100001001 (1) 0100000001
40824	1	0100001001 (1) 0100001101
40825	1	0100001001 (1) 0100001011
40826	1	1101001001 (1) 1101101001
40827	1	1101001001 (1) 1101000001
40828	1	1101001001 (1) 1101001101
40829	1	1101001001 (1) 1101001011
40830	1	1100001101 (1) 1101001101
40831	1	1100001101 (1) 1100000101
40832	1	1100001101 (1) 1100001111
40833	1	1100001011 (1) 1101001011
40834	1	1100001011 (1) 1100000011
40835	1	1100001011 (1) 1100001111
40845	1	0001001001 (1) 0001000001
40846	1	0001001001 (1) 0001001101
40847	1	0001001001 (1) 0001001011
40849	1	0000001101 (1) 0001001101
40850	1	0000001101 (1) 0000000101
40851	1	0000001101 (1) 0000001111
40852	1	0000001011 (1) 0001001011
40853	1	0000001011 (1) 0000000011
40854	1	0000001011 (1) 0000001111
40855	1	0000001001 (1) 0001001001
40856	1	0000001001 (1) 0000000001
40857	1	0000001001 (1) 0000001101
40858	1	0000001001 (1) 0000001011
40859	1	1100001001 (1) 1101001001
40860	1	1100001001 (1) 1100000001
40861	1	1100001001 (1) 1100001101
40862	1	1100001001 (1) 1100001011
40863	1	1001001001 (1) 1101001001
40864	1	1001001001 (1) 1001000001
40865	1	1001001001 (1) 1001001101
40866	1	1001001001 (1) 1001001011
40867	1	1000001101 (1) 1100001101
40869	1	1000001101 (1) 1001001101
40870	1	1000001101 (1) 1000000101
40871	1	1000001101 (1) 1000001111
40872	1	1000001011 (1) 1100001011
40873	1	1000001011 (1) 1001001011
40874	1	1000001011 (1) 1000000011
40875	1	1000001011 (1) 1000001111
40876	1	1000001001 (1) 1100001001
40877	1	1000001001 (1) 1001001001
40878	1	1000001001 (1) 1000000001
40879	1	1000001001 (1) 1000001101
40880	1	1000001001 (1) 1000001011
40881	1	0100111010 (1) 0000111010
40882	1	0100111010 (1) 0101111010
40883	1	0100111010 (1) 0100011010
40884	1	0100111010 (1) 0100110010
40885	1	0100111010 (1) 0100111110
40886	1	0100111010 (1) 0100111000
40887	1	0100101010 (1) 0000101010
40888	1	0100101010 (1) 0101101010
40889	1	0100101010 (1) 0100001010
40890	1	0100101010 (1) 0100111010
40891	1	0100101010 (1) 0100100010
40892	1	0100101010 (1) 0100101000
40896	1	1100111010 (1) 1000111010
40897	1	1100111010 (1) 1101111010
40898	1	1100111010 (1) 1100011010
40899	1	1100111010 (1) 1100110010
40900	1	1100111010 (1) 1100111110
40901	1	1100111010 (1) 1100111000
40906	1	0101011001 (1) 0001011001
40907	1	0101011001 (1) 0101111001
40908	1	0101011001 (1) 0101001001
40909	1	0101011001 (1) 0101011101
40910	1	0101011001 (1) 0101011011
40911	1	0101010101 (1) 0001010101
40912	1	0101010101 (1) 0101110101
40913	1	0101010101 (1) 0101000101
40914	1	0101010101 (1) 0101011101
40915	1	0101010101 (1) 0101010111
40916	1	0101010011 (1) 0001010011
40917	1	0101010011 (1) 0101110011
40918	1	0101010011 (1) 0101000011
40919	1	0101010011 (1) 0101010111
40920	1	1101011001 (1) 1001011001
40921	1	1101011001 (1) 1101111001
40922	1	1101011001 (1) 1101001001
40923	1	1101011001 (1) 1101011101
40924	1	1101011001 (1) 1101011011
40925	1	1101010101 (1) 1001010101
40926	1	1101010101 (1) 1101110101
40927	1	1101010101 (1) 1101000101
40928	1	1101010101 (1) 1101011101
40929	1	1101010101 (1) 1101010111
40930	1	1101010011 (1) 1001010011
40931	1	1101010011 (1) 1101110011
40932	1	1101010011 (1) 1101000011
40933	1	1101010011 (1) 1101010111
40934	1	1100101010 (1) 1101101010
40935	1	1100101010 (1) 1100001010
40936	1	1100101010 (1) 1100111010
40937	1	1100101010 (1) 1100100010
40938	1	1100101010 (1) 1100101000
40944	1	1001101010 (1) 1101101010
40946	1	1001101010 (1) 1001001010
40947	1	1001101010 (1) 1001111010
40948	1	1001101010 (1) 1001100010
40949	1	1001101010 (1) 1001101000
40951	1	1000111010 (1) 1001111010
40952	1	1000111010 (1) 1000011010
40953	1	1000111010 (1) 1000110010
40954	1	1000111010 (1) 1000111110
40955	1	1000111010 (1) 1000111000
40956	1	1000101010 (1) 1100101010
40958	1	1000101010 (1) 1001101010
40959	1	1000101010 (1) 1000001010
40960	1	1000101010 (1) 1000111010
40961	1	1000101010 (1) 1000100010
40962	1	1000101010 (1) 1000101000
40968	1	0001101010 (1) 0001001010
40969	1	0001101010 (1) 0001111010
40970	1	0001101010 (1) 0001100010
40971	1	0001101010 (1) 0001101000
40973	1	0000111010 (1) 0001111010
40974	1	0000111010 (1) 0000011010
40975	1	0000111010 (1) 0000110010
40976	1	0000111010 (1) 0000111110
40977	1	0000111010 (1) 0000111000
40979	1	0000101010 (1) 0001101010
40980	1	0000101010 (1) 0000001010
40981	1	0000101010 (1) 0000111010
40982	1	0000101010 (1) 0000100010
40983	1	0000101010 (1) 0000101000
40984	1	0001011001 (1) 0001001001
40985	1	0001011001 (1) 0001011101
40986	1	0001011001 (1) 0001011011
40988	1	0001010101 (1) 0001110101
40989	1	0001010101 (1) 0001000101
40990	1	0001010101 (1) 0001011101
40991	1	0001010101 (1) 0001010111
40992	1	0001010011 (1) 0001000011
40993	1	0001010011 (1) 0001010111
40994	1	1001011001 (1) 1001001001
40995	1	1001011001 (1) 1001011101
40996	1	1001011001 (1) 1001011011
40998	1	1001010101 (1) 1001110101
40999	1	1001010101 (1) 1001000101
41000	1	1001010101 (1) 1001011101
41001	1	1001010101 (1) 1001010111
41002	1	1001010011 (1) 1001000011
41003	1	1001010011 (1) 1001010111
41018	1	0100100110 (1) 0000100110
41019	1	0100100110 (1) 0101100110
41020	1	0100100110 (1) 0100110110
41021	1	0100100110 (1) 0100100010
41022	1	0100100110 (1) 0100100100
41030	1	1100100110 (1) 1101100110
41031	1	1100100110 (1) 1100110110
41032	1	1100100110 (1) 1100100010
41033	1	1100100110 (1) 1100100100
41037	1	0000100110 (1) 0001100110
41038	1	0000100110 (1) 0000110110
41039	1	0000100110 (1) 0000100010
41040	1	0000100110 (1) 0000100100
41041	1	1000100110 (1) 1100100110
41043	1	1000100110 (1) 1001100110
41044	1	1000100110 (1) 1000110110
41045	1	1000100110 (1) 1000100010
41046	1	1000100110 (1) 1000100100
41106	1	0100011110 (1) 0000011110
41107	1	0100011110 (1) 0101011110
41108	1	0100011110 (1) 0100001110
41109	1	0100011110 (1) 0100010110
41110	1	1100011110 (1) 1000011110
41111	1	1100011110 (1) 1101011110
41112	1	1100011110 (1) 1100001110
41113	1	1100011110 (1) 1100010110
41157	1	0101101010 (1) 0001101010
41158	1	0101101010 (1) 0101111010
41159	1	0101101010 (1) 0101100010
41160	1	0101101010 (1) 0101101000
41175	1	0000011110 (1) 0001011110
41176	1	0000011110 (1) 0000001110
41177	1	0000011110 (1) 0000010110
41179	1	1000011110 (1) 1001011110
41180	1	1000011110 (1) 1000001110
41181	1	1000011110 (1) 1000010110
41182	1	1101101010 (1) 1101111010
41183	1	1101101010 (1) 1101100010
41184	1	1101101010 (1) 1101101000
41185	1	0101010001 (1) 0001010001
41186	1	0101010001 (1) 0101110001
41187	1	0101010001 (1) 0101000001
41188	1	0101010001 (1) 0101011001
41189	1	0101010001 (1) 0101010101
41190	1	0101010001 (1) 0101010011
41191	1	0100011001 (1) 0000011001
41192	1	0100011001 (1) 0101011001
41193	1	0100011001 (1) 0100001001
41194	1	0100011001 (1) 0100011101
41195	1	0100011001 (1) 0100011011
41196	1	0100010101 (1) 0000010101
41197	1	0100010101 (1) 0101010101
41198	1	0100010101 (1) 0100110101
41199	1	0100010101 (1) 0100000101
41200	1	0100010101 (1) 0100011101
41201	1	0100010101 (1) 0100010111
41202	1	0100010011 (1) 0000010011
41203	1	0100010011 (1) 0101010011
41204	1	0100010011 (1) 0100000011
41205	1	0100010011 (1) 0100010111
41206	1	0100010001 (1) 0000010001
41207	1	0100010001 (1) 0101010001
41208	1	0100010001 (1) 0100000001
41209	1	0100010001 (1) 0100011001
41210	1	0100010001 (1) 0100010101
41211	1	0100010001 (1) 0100010011
41212	1	0101110001 (1) 0001110001
41213	1	0101110001 (1) 0101111001
41214	1	0101110001 (1) 0101110101
41215	1	0101100101 (1) 0001100101
41216	1	0101100101 (1) 0101110101
41217	1	1101010001 (1) 1001010001
41218	1	1101010001 (1) 1101110001
41219	1	1101010001 (1) 1101000001
41220	1	1101010001 (1) 1101011001
41221	1	1101010001 (1) 1101010101
41222	1	1101010001 (1) 1101010011
41223	1	1100011001 (1) 1000011001
41224	1	1100011001 (1) 1101011001
41225	1	1100011001 (1) 1100001001
41226	1	1100011001 (1) 1100011101
41227	1	1100011001 (1) 1100011011
41228	1	1100010101 (1) 1000010101
41229	1	1100010101 (1) 1101010101
41230	1	1100010101 (1) 1100110101
41231	1	1100010101 (1) 1100000101
41232	1	1100010101 (1) 1100011101
41233	1	1100010101 (1) 1100010111
41234	1	1100010011 (1) 1000010011
41235	1	1100010011 (1) 1101010011
41236	1	1100010011 (1) 1100000011
41237	1	1100010011 (1) 1100010111
41238	1	1100010001 (1) 1000010001
41239	1	1100010001 (1) 1101010001
41240	1	1100010001 (1) 1100000001
41241	1	1100010001 (1) 1100011001
41242	1	1100010001 (1) 1100010101
41243	1	1100010001 (1) 1100010011
41244	1	1101110001 (1) 1001110001
41245	1	1101110001 (1) 1101111001
41246	1	1101110001 (1) 1101110101
41247	1	1101100101 (1) 1101110101
41254	1	1001110001 (1) 1001010001
41255	1	1001110001 (1) 1001111001
41256	1	1001110001 (1) 1001110101
41257	1	1001100101 (1) 1101100101
41259	1	1001100101 (1) 1001110101
41265	1	0001110001 (1) 0001010001
41266	1	0001110001 (1) 0001111001
41267	1	0001110001 (1) 0001110101
41269	1	0001100101 (1) 0001110101
41270	1	0001010001 (1) 0001000001
41271	1	0001010001 (1) 0001011001
41272	1	0001010001 (1) 0001010101
41273	1	0001010001 (1) 0001010011
41274	1	0000011001 (1) 0001011001
41275	1	0000011001 (1) 0000001001
41276	1	0000011001 (1) 0000011101
41277	1	0000011001 (1) 0000011011
41279	1	0000010101 (1) 0001010101
41280	1	0000010101 (1) 0000110101
41281	1	0000010101 (1) 0000000101
41282	1	0000010101 (1) 0000011101
41283	1	0000010101 (1) 0000010111
41284	1	0000010011 (1) 0001010011
41285	1	0000010011 (1) 0000000011
41286	1	0000010011 (1) 0000010111
41287	1	0000010001 (1) 0001010001
41288	1	0000010001 (1) 0000000001
41289	1	0000010001 (1) 0000011001
41290	1	0000010001 (1) 0000010101
41291	1	0000010001 (1) 0000010011
41292	1	1001010001 (1) 1001000001
41293	1	1001010001 (1) 1001011001
41294	1	1001010001 (1) 1001010101
41295	1	1001010001 (1) 1001010011
41296	1	1000011001 (1) 1001011001
41297	1	1000011001 (1) 1000001001
41298	1	1000011001 (1) 1000011101
41299	1	1000011001 (1) 1000011011
41301	1	1000010101 (1) 1001010101
41302	1	1000010101 (1) 1000110101
41303	1	1000010101 (1) 1000000101
41304	1	1000010101 (1) 1000011101
41305	1	1000010101 (1) 1000010111
41306	1	1000010011 (1) 1001010011
41307	1	1000010011 (1) 1000000011
41308	1	1000010011 (1) 1000010111
41309	1	1000010001 (1) 1001010001
41310	1	1000010001 (1) 1000000001
41311	1	1000010001 (1) 1000011001
41312	1	1000010001 (1) 1000010101
41313	1	1000010001 (1) 1000010011
41345	1	0100101100 (1) 0000101100
41346	1	0100101100 (1) 0101101100
41347	1	0100101100 (1) 0100001100
41348	1	0100101100 (1) 0100111100
41349	1	0100101100 (1) 0100100100
41350	1	0100101100 (1) 0100101000
41364	1	1100101100 (1) 1101101100
41365	1	1100101100 (1) 1100001100
41366	1	1100101100 (1) 1100111100
41367	1	1100101100 (1) 1100100100
41368	1	1100101100 (1) 1100101000
41374	1	1001101100 (1) 1101101100
41376	1	1001101100 (1) 1001001100
41377	1	1001101100 (1) 1001111100
41378	1	1001101100 (1) 1001100100
41379	1	1001101100 (1) 1001101000
41380	1	1000101100 (1) 1100101100
41382	1	1000101100 (1) 1001101100
41383	1	1000101100 (1) 1000001100
41384	1	1000101100 (1) 1000111100
41385	1	1000101100 (1) 1000100100
41386	1	1000101100 (1) 1000101000
41392	1	0001101100 (1) 0001001100
41393	1	0001101100 (1) 0001111100
41394	1	0001101100 (1) 0001100100
41395	1	0001101100 (1) 0001101000
41397	1	0000101100 (1) 0001101100
41398	1	0000101100 (1) 0000001100
41399	1	0000101100 (1) 0000111100
41400	1	0000101100 (1) 0000100100
41401	1	0000101100 (1) 0000101000
41431	1	0100110001 (1) 0000110001
41432	1	0100110001 (1) 0101110001
41433	1	0100110001 (1) 0100010001
41434	1	0100110001 (1) 0100111001
41435	1	0100110001 (1) 0100110101
41436	1	0100100101 (1) 0000100101
41437	1	0100100101 (1) 0101100101
41438	1	0100100101 (1) 0100110101
41439	1	0100100001 (1) 0000100001
41440	1	0100100001 (1) 0101100001
41441	1	0100100001 (1) 0100000001
41442	1	0100100001 (1) 0100110001
41443	1	0100100001 (1) 0100100101
41444	1	1100110001 (1) 1000110001
41445	1	1100110001 (1) 1101110001
41446	1	1100110001 (1) 1100010001
41447	1	1100110001 (1) 1100111001
41448	1	1100110001 (1) 1100110101
41449	1	1100100101 (1) 1101100101
41450	1	1100100101 (1) 1100110101
41464	1	1100100001 (1) 1101100001
41465	1	1100100001 (1) 1100000001
41466	1	1100100001 (1) 1100110001
41467	1	1100100001 (1) 1100100101
41472	1	1001100001 (1) 1101100001
41474	1	1001100001 (1) 1001000001
41475	1	1001100001 (1) 1001110001
41476	1	1001100001 (1) 1001100101
41478	1	1000110001 (1) 1001110001
41479	1	1000110001 (1) 1000010001
41480	1	1000110001 (1) 1000111001
41481	1	1000110001 (1) 1000110101
41482	1	1000100101 (1) 1100100101
41484	1	1000100101 (1) 1001100101
41485	1	1000100101 (1) 1000110101
41486	1	1000100001 (1) 1100100001
41488	1	1000100001 (1) 1001100001
41489	1	1000100001 (1) 1000000001
41490	1	1000100001 (1) 1000110001
41491	1	1000100001 (1) 1000100101
41496	1	0001100001 (1) 0001000001
41497	1	0001100001 (1) 0001110001
41498	1	0001100001 (1) 0001100101
41500	1	0000110001 (1) 0001110001
41501	1	0000110001 (1) 0000010001
41502	1	0000110001 (1) 0000111001
41503	1	0000110001 (1) 0000110101
41505	1	0000100101 (1) 0001100101
41506	1	0000100101 (1) 0000110101
41508	1	0000100001 (1) 0001100001
41509	1	0000100001 (1) 0000000001
41510	1	0000100001 (1) 0000110001
41511	1	0000100001 (1) 0000100101
41545	1	0101101100 (1) 0001101100
41546	1	0101101100 (1) 0101111100
41547	1	0101101100 (1) 0101100100
41548	1	0101101100 (1) 0101101000
41549	1	0101001110 (1) 0001001110
41550	1	0101001110 (1) 0101101110
41551	1	0101001110 (1) 0101000110
41552	1	0101001110 (1) 0101001010
41553	1	1101101100 (1) 1101111100
41554	1	1101101100 (1) 1101100100
41555	1	1101101100 (1) 1101101000
41556	1	1101001110 (1) 1101101110
41557	1	1101001110 (1) 1101000110
41558	1	1101001110 (1) 1101001010
41586	1	0001001110 (1) 0001000110
41587	1	0001001110 (1) 0001001010
41603	1	1001001110 (1) 1101001110
41605	1	1001001110 (1) 1001000110
41606	1	1001001110 (1) 1001001010
41617	1	0101100001 (1) 0001100001
41618	1	0101100001 (1) 0101110001
41619	1	0101100001 (1) 0101100101
41620	1	0101000101 (1) 0001000101
41621	1	0101000101 (1) 0101100101
41622	1	0101000101 (1) 0101000111
41623	1	0101000011 (1) 0001000011
41624	1	0101000011 (1) 0101100011
41625	1	0101000011 (1) 0101000111
41626	1	1101100001 (1) 1101110001
41627	1	1101100001 (1) 1101100101
41628	1	1101000101 (1) 1101100101
41629	1	1101000101 (1) 1101000111
41630	1	1101000011 (1) 1101100011
41631	1	1101000011 (1) 1101000111
41638	1	0101110010 (1) 0001110010
41639	1	0101110010 (1) 0101110000
41652	1	1001000101 (1) 1101000101
41654	1	1001000101 (1) 1001100101
41655	1	1001000101 (1) 1001000111
41656	1	1001000011 (1) 1101000011
41657	1	1001000011 (1) 1001000111
41659	1	0001000101 (1) 0001100101
41660	1	0001000101 (1) 0001000111
41661	1	0001000011 (1) 0001000111
41664	1	1101110010 (1) 1001110010
41665	1	1101110010 (1) 1101110000
41673	1	0001110010 (1) 0001010010
41674	1	0001110010 (1) 0001110000
41690	1	1001110010 (1) 1001010010
41691	1	1001110010 (1) 1001110000
41728	1	0101111100 (1) 0001111100
41729	1	1101111100 (1) 1001111100
41746	1	0101001100 (1) 0001001100
41747	1	0101001100 (1) 0101101100
41748	1	0101001100 (1) 0101000100
41749	1	0101001100 (1) 0101001000
41750	1	0101001100 (1) 0101001110
41751	1	0100001110 (1) 0000001110
41752	1	0100001110 (1) 0101001110
41753	1	0100001110 (1) 0100000110
41754	1	0100001110 (1) 0100001010
41755	1	0100001100 (1) 0000001100
41756	1	0100001100 (1) 0101001100
41757	1	0100001100 (1) 0100000100
41758	1	0100001100 (1) 0100001000
41759	1	0100001100 (1) 0100001110
41761	1	0001111100 (1) 0001011100
41762	1	1101001100 (1) 1101101100
41763	1	1101001100 (1) 1101000100
41764	1	1101001100 (1) 1101001000
41765	1	1101001100 (1) 1101001110
41766	1	1100001110 (1) 1101001110
41767	1	1100001110 (1) 1100000110
41768	1	1100001110 (1) 1100001010
41770	1	1001111100 (1) 1001011100
41804	1	0001001100 (1) 0001000100
41805	1	0001001100 (1) 0001001000
41806	1	0001001100 (1) 0001001110
41808	1	0000001110 (1) 0001001110
41809	1	0000001110 (1) 0000000110
41810	1	0000001110 (1) 0000001010
41812	1	0000001100 (1) 0001001100
41813	1	0000001100 (1) 0000000100
41814	1	0000001100 (1) 0000001000
41815	1	0000001100 (1) 0000001110
41816	1	1100001100 (1) 1101001100
41817	1	1100001100 (1) 1100000100
41818	1	1100001100 (1) 1100001000
41819	1	1100001100 (1) 1100001110
41824	1	1001001100 (1) 1101001100
41826	1	1001001100 (1) 1001000100
41827	1	1001001100 (1) 1001001000
41828	1	1001001100 (1) 1001001110
41829	1	1000001110 (1) 1100001110
41831	1	1000001110 (1) 1001001110
41832	1	1000001110 (1) 1000000110
41833	1	1000001110 (1) 1000001010
41834	1	1000001100 (1) 1100001100
41836	1	1000001100 (1) 1001001100
41837	1	1000001100 (1) 1000000100
41838	1	1000001100 (1) 1000001000
41839	1	1000001100 (1) 1000001110
41844	1	1101010110 (1) 1001010110
41845	1	1101010110 (1) 1101110110
41846	1	1101010110 (1) 1101000110
41847	1	1101010110 (1) 1101010010
41848	1	0101010110 (1) 0001010110
41849	1	0101010110 (1) 0101110110
41850	1	0101010110 (1) 0101000110
41851	1	0101010110 (1) 0101010010
41867	1	1001010110 (1) 1001110110
41868	1	1001010110 (1) 1001000110
41869	1	1001010110 (1) 1001010010
41877	1	0001010110 (1) 0001110110
41878	1	0001010110 (1) 0001000110
41879	1	0001010110 (1) 0001010010
41880	1	0101000001 (1) 0001000001
41881	1	0101000001 (1) 0101100001
41882	1	0101000001 (1) 0101000101
41883	1	0101000001 (1) 0101000011
41884	1	0100000101 (1) 0000000101
41885	1	0100000101 (1) 0101000101
41886	1	0100000101 (1) 0100100101
41887	1	0100000101 (1) 0100000111
41888	1	0100000011 (1) 0000000011
41889	1	0100000011 (1) 0101000011
41890	1	0100000011 (1) 0100000111
41891	1	0100000001 (1) 0000000001
41892	1	0100000001 (1) 0101000001
41893	1	0100000001 (1) 0100000101
41894	1	0100000001 (1) 0100000011
41895	1	1101000001 (1) 1101100001
41896	1	1101000001 (1) 1101000101
41897	1	1101000001 (1) 1101000011
41898	1	1100000101 (1) 1101000101
41899	1	1100000101 (1) 1100100101
41900	1	1100000101 (1) 1100000111
41901	1	1100000011 (1) 1101000011
41902	1	1100000011 (1) 1100000111
41909	1	1100000001 (1) 1101000001
41910	1	1100000001 (1) 1100000101
41911	1	1100000001 (1) 1100000011
41912	1	1001000001 (1) 1101000001
41913	1	1001000001 (1) 1001000101
41914	1	1001000001 (1) 1001000011
41915	1	1000000101 (1) 1100000101
41917	1	1000000101 (1) 1001000101
41918	1	1000000101 (1) 1000100101
41919	1	1000000101 (1) 1000000111
41920	1	1000000011 (1) 1100000011
41921	1	1000000011 (1) 1001000011
41922	1	1000000011 (1) 1000000111
41923	1	1000000001 (1) 1100000001
41924	1	1000000001 (1) 1001000001
41925	1	1000000001 (1) 1000000101
41926	1	1000000001 (1) 1000000011
41927	1	0001000001 (1) 0001000101
41928	1	0001000001 (1) 0001000011
41930	1	0000000101 (1) 0001000101
41931	1	0000000101 (1) 0000100101
41932	1	0000000101 (1) 0000000111
41933	1	0000000011 (1) 0001000011
41934	1	0000000011 (1) 0000000111
41935	1	0000000001 (1) 0001000001
41936	1	0000000001 (1) 0000000101
41937	1	0000000001 (1) 0000000011
41938	1	0100110010 (1) 0000110010
41939	1	0100110010 (1) 0101110010
41940	1	0100110010 (1) 0100010010
41941	1	0100110010 (1) 0100110000
41942	1	0100100010 (1) 0000100010
41943	1	0100100010 (1) 0101100010
41944	1	0100100010 (1) 0100000010
41945	1	0100100010 (1) 0100110010
41946	1	0100100010 (1) 0100100000
41948	1	1100110010 (1) 1000110010
41949	1	1100110010 (1) 1101110010
41950	1	1100110010 (1) 1100010010
41951	1	1100110010 (1) 1100110000
41957	1	0001100010 (1) 0001000010
41958	1	0001100010 (1) 0001110010
41959	1	0001100010 (1) 0001100000
41961	1	0000110010 (1) 0001110010
41962	1	0000110010 (1) 0000010010
41963	1	0000110010 (1) 0000110000
41965	1	0000100010 (1) 0001100010
41966	1	0000100010 (1) 0000000010
41967	1	0000100010 (1) 0000110010
41968	1	0000100010 (1) 0000100000
41969	1	1100100010 (1) 1101100010
41970	1	1100100010 (1) 1100000010
41971	1	1100100010 (1) 1100110010
41972	1	1100100010 (1) 1100100000
41977	1	1001100010 (1) 1101100010
41979	1	1001100010 (1) 1001000010
41980	1	1001100010 (1) 1001110010
41981	1	1001100010 (1) 1001100000
41983	1	1000110010 (1) 1001110010
41984	1	1000110010 (1) 1000010010
41985	1	1000110010 (1) 1000110000
41986	1	1000100010 (1) 1100100010
41988	1	1000100010 (1) 1001100010
41989	1	1000100010 (1) 1000000010
41990	1	1000100010 (1) 1000110010
41991	1	1000100010 (1) 1000100000
42016	1	0111110100 (1) 0011110100
42018	1	0111110100 (1) 0110110100
42019	1	0111110100 (1) 0111111100
42020	1	0111110100 (1) 0111110000
42021	1	1111110100 (1) 1011110100
42023	1	1111110100 (1) 1110110100
42024	1	1111110100 (1) 1111111100
42025	1	1111110100 (1) 1111110000
42026	1	1010010110 (1) 1010110110
42027	1	1010010110 (1) 1010000110
42028	1	1010010110 (1) 1010010010
42029	1	0010010110 (1) 0010110110
42030	1	0010010110 (1) 0010000110
42031	1	0010010110 (1) 0010010010
42035	1	0111100010 (1) 0011100010
42037	1	0111100010 (1) 0110100010
42038	1	0111100010 (1) 0111110010
42039	1	0111100010 (1) 0111100000
42040	1	0011110100 (1) 0010110100
42041	1	0011110100 (1) 0011111100
42042	1	0011110100 (1) 0011110000
42043	1	1011110100 (1) 1010110100
42044	1	1011110100 (1) 1011111100
42045	1	1011110100 (1) 1011110000
42050	1	1111100010 (1) 1110100010
42051	1	1111100010 (1) 1111110010
42052	1	1111100010 (1) 1111100000
42095	1	1111011100 (1) 1011011100
42097	1	1111011100 (1) 1110011100
42098	1	1111011100 (1) 1111111100
42099	1	1111011100 (1) 1111001100
42100	1	1111011100 (1) 1111011110
42101	1	1111011010 (1) 1011011010
42103	1	1111011010 (1) 1110011010
42104	1	1111011010 (1) 1111111010
42105	1	1111011010 (1) 1111001010
42106	1	1111011010 (1) 1111010010
42107	1	1111011010 (1) 1111011110
42108	1	0111011100 (1) 0011011100
42110	1	0111011100 (1) 0110011100
42111	1	0111011100 (1) 0111111100
42112	1	0111011100 (1) 0111001100
42113	1	0111011100 (1) 0111011110
42114	1	0111011010 (1) 0011011010
42116	1	0111011010 (1) 0110011010
42117	1	0111011010 (1) 0111111010
42118	1	0111011010 (1) 0111001010
42119	1	0111011010 (1) 0111010010
42120	1	0111011010 (1) 0111011110
42127	1	1010010100 (1) 1010110100
42128	1	1010010100 (1) 1010000100
42129	1	1010010100 (1) 1010011100
42130	1	1010010100 (1) 1010010000
42131	1	1010010100 (1) 1010010110
42150	1	0010010100 (1) 0010110100
42151	1	0010010100 (1) 0010000100
42152	1	0010010100 (1) 0010011100
42153	1	0010010100 (1) 0010010000
42154	1	0010010100 (1) 0010010110
42173	1	0011011100 (1) 0010011100
42174	1	0011011100 (1) 0011001100
42175	1	0011011100 (1) 0011011110
42177	1	0011011010 (1) 0010011010
42178	1	0011011010 (1) 0011001010
42179	1	0011011010 (1) 0011010010
42180	1	0011011010 (1) 0011011110
42187	1	1011011100 (1) 1010011100
42188	1	1011011100 (1) 1011001100
42189	1	1011011100 (1) 1011011110
42191	1	1011011010 (1) 1010011010
42192	1	1011011010 (1) 1011001010
42193	1	1011011010 (1) 1011010010
42194	1	1011011010 (1) 1011011110
42218	1	0110110100 (1) 0010110100
42220	1	0110110100 (1) 0110111100
42221	1	0110110100 (1) 0110110000
42228	1	1110110100 (1) 1010110100
42230	1	1110110100 (1) 1110111100
42231	1	1110110100 (1) 1110110000
42238	1	0010110100 (1) 0010111100
42239	1	0010110100 (1) 0010110000
42240	1	1010110100 (1) 1010111100
42241	1	1010110100 (1) 1010110000
42246	1	0110011100 (1) 0010011100
42248	1	0110011100 (1) 0110001100
42249	1	0110011100 (1) 0110011110
42250	1	0110011010 (1) 0010011010
42252	1	0110011010 (1) 0110001010
42253	1	0110011010 (1) 0110010010
42254	1	0110011010 (1) 0110011110
42259	1	1110011100 (1) 1010011100
42261	1	1110011100 (1) 1110001100
42262	1	1110011100 (1) 1110011110
42263	1	1110011010 (1) 1010011010
42265	1	1110011010 (1) 1110001010
42266	1	1110011010 (1) 1110010010
42267	1	1110011010 (1) 1110011110
42272	1	0010011100 (1) 0010001100
42273	1	0010011100 (1) 0010011110
42275	1	0010011010 (1) 0010001010
42276	1	0010011010 (1) 0010010010
42277	1	0010011010 (1) 0010011110
42278	1	1010011100 (1) 1010001100
42279	1	1010011100 (1) 1010011110
42281	1	1010011010 (1) 1010001010
42282	1	1010011010 (1) 1010010010
42283	1	1010011010 (1) 1010011110
42288	1	0111100100 (1) 0011100100
42290	1	0111100100 (1) 0110100100
42291	1	0111100100 (1) 0111110100
42292	1	0111100100 (1) 0111100000
42293	1	0111000110 (1) 0011000110
42295	1	0111000110 (1) 0110000110
42296	1	0111000110 (1) 0111100110
42297	1	0111000110 (1) 0111000010
42298	1	0111000100 (1) 0011000100
42300	1	0111000100 (1) 0110000100
42301	1	0111000100 (1) 0111100100
42302	1	0111000100 (1) 0111000000
42303	1	0111000100 (1) 0111000110
42305	1	1111100100 (1) 1110100100
42306	1	1111100100 (1) 1111110100
42307	1	1111100100 (1) 1111100000
42309	1	1111000110 (1) 1110000110
42310	1	1111000110 (1) 1111100110
42311	1	1111000110 (1) 1111000010
42321	1	0011100100 (1) 0010100100
42322	1	0011100100 (1) 0011110100
42323	1	0011100100 (1) 0011100000
42324	1	0011000110 (1) 0010000110
42325	1	0011000110 (1) 0011100110
42326	1	0011000110 (1) 0011000010
42337	1	1111000100 (1) 1110000100
42338	1	1111000100 (1) 1111100100
42339	1	1111000100 (1) 1111000000
42340	1	1111000100 (1) 1111000110
42341	1	1011100100 (1) 1111100100
42342	1	1011100100 (1) 1010100100
42343	1	1011100100 (1) 1011110100
42344	1	1011100100 (1) 1011100000
42345	1	1011000110 (1) 1111000110
42346	1	1011000110 (1) 1010000110
42347	1	1011000110 (1) 1011100110
42348	1	1011000110 (1) 1011000010
42349	1	1011101000 (1) 1111101000
42350	1	1011101000 (1) 1010101000
42351	1	1011101000 (1) 1011001000
42352	1	1011101000 (1) 1011111000
42353	1	1011101000 (1) 1011100000
42354	1	0011101000 (1) 0010101000
42355	1	0011101000 (1) 0011001000
42356	1	0011101000 (1) 0011111000
42357	1	0011101000 (1) 0011100000
42384	1	0011000100 (1) 0010000100
42385	1	0011000100 (1) 0011100100
42386	1	0011000100 (1) 0011000000
42387	1	0011000100 (1) 0011000110
42394	1	1011000100 (1) 1111000100
42395	1	1011000100 (1) 1010000100
42396	1	1011000100 (1) 1011100100
42397	1	1011000100 (1) 1011000000
42398	1	1011000100 (1) 1011000110
42407	1	0110101000 (1) 0010101000
42409	1	0110101000 (1) 0110001000
42410	1	0110101000 (1) 0110111000
42411	1	0110101000 (1) 0110100000
42413	1	1110101000 (1) 1110001000
42414	1	1110101000 (1) 1110111000
42415	1	1110101000 (1) 1110100000
42416	1	0111111000 (1) 0011111000
42418	1	0111111000 (1) 0110111000
42419	1	0111111000 (1) 0111111100
42420	1	1111111000 (1) 1011111000
42422	1	1111111000 (1) 1110111000
42423	1	1111111000 (1) 1111111100
42424	1	0110100100 (1) 0010100100
42426	1	0110100100 (1) 0110110100
42427	1	0110100100 (1) 0110100000
42428	1	0110000110 (1) 0010000110
42430	1	0110000110 (1) 0110100110
42431	1	0110000110 (1) 0110000010
42432	1	0110000100 (1) 0010000100
42434	1	0110000100 (1) 0110100100
42435	1	0110000100 (1) 0110000000
42436	1	0110000100 (1) 0110000110
42437	1	0011111000 (1) 0010111000
42438	1	0011111000 (1) 0011011000
42439	1	0011111000 (1) 0011111100
42441	1	1110100100 (1) 1110110100
42442	1	1110100100 (1) 1110100000
42444	1	1110000110 (1) 1110100110
42445	1	1110000110 (1) 1110000010
42446	1	1011111000 (1) 1010111000
42447	1	1011111000 (1) 1011011000
42448	1	1011111000 (1) 1011111100
42454	1	0010100100 (1) 0010110100
42455	1	0010100100 (1) 0010100000
42456	1	0010000110 (1) 0010100110
42457	1	0010000110 (1) 0010000010
42459	1	1110000100 (1) 1110100100
42460	1	1110000100 (1) 1110000000
42461	1	1110000100 (1) 1110000110
42462	1	1010100100 (1) 1110100100
42463	1	1010100100 (1) 1010110100
[truncated: 2,100 more rows]
