# Supplementary material
Source: publisher figshare collection journal article supplement (https://springernature.figshare.com/ndownloader/files/17562821)
Supplement: Supplementary file 1 [file 17562821 › CytoscapeSession-2018_09_25-21_15/tables/37956-STG%2C+Model+1/SHARED_ATTRS-org.cytoscape.model.CyNode-STG%2C+Model+1+root+shared++node.cytable]

CyCSV-Version	1
SUID	AcetylCoA	AMPK	CircFA	Citrate	FattyAcids	Glucose	MalonylCoA	PDC	PDK	Pyruvate	shared name
java.lang.Long	java.lang.Integer	java.lang.Integer	java.lang.Integer	java.lang.Integer	java.lang.Integer	java.lang.Integer	java.lang.Integer	java.lang.Integer	java.lang.Integer	java.lang.Integer	java.lang.String
	mutable	mutable	mutable	mutable	mutable	mutable	mutable	mutable	mutable	mutable
STG, Model 1 root shared node
38926	0	0	0	1	0	1	1	0	1	0	1010011000
38925	1	0	0	1	0	0	0	1	1	0	0011110000
38924	0	0	0	1	0	0	0	0	1	0	0010010000
38923	0	1	0	1	0	0	0	0	1	0	0010010010
38922	0	0	0	1	0	0	1	0	1	0	0010011000
38921	1	0	0	1	0	1	0	1	1	1	1111110000
38920	0	0	0	1	0	1	0	0	1	1	1110010000
38919	0	1	0	1	0	1	0	0	1	1	1110010010
38918	0	0	0	1	0	1	1	0	1	1	1110011000
38917	1	0	0	1	0	0	0	1	1	1	0111110000
38916	0	0	0	1	0	0	0	0	1	1	0110010000
38915	0	1	0	1	0	0	0	0	1	1	0110010010
38914	0	0	0	1	0	0	1	0	1	1	0110011000
38893	0	0	0	1	0	1	0	1	1	0	1011010000
38892	0	1	0	1	0	1	0	1	1	0	1011010010
38891	0	0	0	1	0	1	1	1	1	0	1011011000
38890	0	0	0	1	0	0	0	1	1	0	0011010000
38889	0	1	0	1	0	0	0	1	1	0	0011010010
38888	0	0	0	1	0	0	1	1	1	0	0011011000
38887	0	0	0	1	0	0	0	1	1	1	0111010000
38886	0	1	0	1	0	0	0	1	1	1	0111010010
38885	0	0	0	1	0	0	1	1	1	1	0111011000
38884	0	0	0	1	0	1	0	1	1	1	1111010000
38883	0	1	0	1	0	1	0	1	1	1	1111010010
38882	0	0	0	1	0	1	1	1	1	1	1111011000
38881	0	0	0	0	0	1	1	0	1	0	1010001000
38880	0	1	0	0	0	1	1	0	1	0	1010001010
38879	0	0	0	0	0	1	1	0	1	1	1110001000
38878	0	0	0	0	0	0	1	0	1	0	0010001000
38877	0	1	0	0	0	0	1	0	1	0	0010001010
38875	0	1	0	0	0	1	1	0	1	1	1110001010
38873	0	0	0	0	0	0	1	0	1	1	0110001000
38872	0	1	0	0	0	0	1	0	1	1	0110001010
38869	1	0	0	1	0	1	1	0	1	0	1010111000
38866	1	0	0	1	0	0	1	0	1	0	0010111000
38865	1	0	0	1	0	1	1	0	1	1	1110111000
38862	1	0	0	1	0	0	1	0	1	1	0110111000
38855	0	0	0	0	1	1	0	0	1	0	1010000100
38853	0	0	0	0	0	1	1	1	1	0	1011001000
38852	0	1	0	0	0	1	1	1	1	0	1011001010
38851	0	0	0	0	0	1	1	1	1	1	1111001000
38846	0	0	0	0	1	0	0	0	1	0	0010000100
38845	0	0	0	0	0	0	1	1	1	0	0011001000
38844	0	1	0	0	0	0	1	1	1	0	0011001010
38839	0	1	0	0	0	1	1	1	1	1	1111001010
38838	1	0	0	0	0	1	1	1	1	1	1111101000
38832	0	0	0	0	0	0	1	1	1	1	0111001000
38831	0	1	0	0	0	0	1	1	1	1	0111001010
38830	1	0	0	0	0	0	1	1	1	1	0111101000
38825	1	0	0	0	0	0	1	0	1	0	0010101000
38822	1	0	0	0	0	1	1	0	1	0	1010101000
38820	0	1	0	0	1	1	0	0	1	0	1010000110
38819	1	0	0	0	1	1	0	0	1	0	1010100100
38818	0	0	0	0	1	1	0	0	1	1	1110000100
38817	0	1	0	0	1	0	0	0	1	0	0010000110
38816	1	0	0	0	1	0	0	0	1	0	0010100100
38814	1	0	0	1	0	1	1	1	1	0	1011111000
38813	0	1	0	0	1	1	0	0	1	1	1110000110
38812	1	0	0	0	1	1	0	0	1	1	1110100100
38811	1	0	0	1	0	0	1	1	1	0	0011111000
38810	0	0	0	0	1	0	0	0	1	1	0110000100
38809	0	1	0	0	1	0	0	0	1	1	0110000110
38808	1	0	0	0	1	0	0	0	1	1	0110100100
38807	1	0	0	1	0	1	1	1	1	1	1111111000
38806	1	0	0	1	0	0	1	1	1	1	0111111000
38805	1	0	0	0	0	1	1	0	1	1	1110101000
38804	1	0	0	0	0	0	1	0	1	1	0110101000
38801	0	0	0	0	1	1	0	1	1	0	1011000100
38798	0	0	0	0	1	0	0	1	1	0	0011000100
38789	1	0	0	0	0	0	1	1	1	0	0011101000
38788	1	0	0	0	0	1	1	1	1	0	1011101000
38787	0	1	0	0	1	1	0	1	1	0	1011000110
38786	1	0	0	0	1	1	0	1	1	0	1011100100
38785	0	0	0	0	1	1	0	1	1	1	1111000100
38782	0	1	0	0	1	0	0	1	1	0	0011000110
38781	1	0	0	0	1	0	0	1	1	0	0011100100
38778	0	1	0	0	1	1	0	1	1	1	1111000110
38777	1	0	0	0	1	1	0	1	1	1	1111100100
38776	0	0	0	0	1	0	0	1	1	1	0111000100
38775	0	1	0	0	1	0	0	1	1	1	0111000110
38774	1	0	0	0	1	0	0	1	1	1	0111100100
38772	0	1	0	1	0	1	1	0	1	0	1010011010
38771	0	0	0	1	1	1	1	0	1	0	1010011100
38770	0	1	0	1	0	0	1	0	1	0	0010011010
38769	0	0	0	1	1	0	1	0	1	0	0010011100
38767	0	1	0	1	0	1	1	0	1	1	1110011010
38766	0	0	0	1	1	1	1	0	1	1	1110011100
38764	0	1	0	1	0	0	1	0	1	1	0110011010
38763	0	0	0	1	1	0	1	0	1	1	0110011100
38761	1	0	0	1	1	1	0	0	1	0	1010110100
38760	1	0	0	1	1	0	0	0	1	0	0010110100
38757	1	0	0	1	1	1	0	0	1	1	1110110100
38754	1	0	0	1	1	0	0	0	1	1	0110110100
38747	0	1	0	1	0	1	1	1	1	0	1011011010
38746	0	0	0	1	1	1	1	1	1	0	1011011100
38743	0	1	0	1	0	0	1	1	1	0	0011011010
38742	0	0	0	1	1	0	1	1	1	0	0011011100
38738	0	0	0	1	1	0	0	0	1	0	0010010100
38734	0	0	0	1	1	1	0	0	1	0	1010010100
38731	0	1	0	1	0	0	1	1	1	1	0111011010
38730	0	0	0	1	1	0	1	1	1	1	0111011100
38729	0	1	0	1	0	1	1	1	1	1	1111011010
38728	0	0	0	1	1	1	1	1	1	1	1111011100
38719	1	1	0	0	0	1	0	1	1	1	1111100010
38717	1	0	0	1	1	1	0	1	1	0	1011110100
38716	1	0	0	1	1	0	0	1	1	0	0011110100
38715	1	1	0	0	0	0	0	1	1	1	0111100010
38713	0	1	0	1	1	0	0	0	1	0	0010010110
38712	0	1	0	1	1	1	0	0	1	0	1010010110
38711	1	0	0	1	1	1	0	1	1	1	1111110100
38710	1	0	0	1	1	0	0	1	1	1	0111110100
38709	0	0	0	1	1	0	0	0	1	1	0110010100
38708	0	1	0	1	1	0	0	0	1	1	0110010110
38707	0	0	0	1	1	1	0	0	1	1	1110010100
38706	0	1	0	1	1	1	0	0	1	1	1110010110
38702	1	1	0	0	0	1	0	0	1	0	1010100010
38697	1	1	0	0	0	0	0	0	1	0	0010100010
38696	1	0	0	1	1	1	1	0	1	0	1010111100
38694	1	0	0	1	1	0	1	0	1	0	0010111100
38682	1	0	0	1	1	1	1	0	1	1	1110111100
38681	1	0	0	1	1	0	1	0	1	1	0110111100
38672	0	0	0	1	1	0	0	1	1	0	0011010100
38670	0	0	0	1	1	1	0	1	1	0	1011010100
38669	1	1	0	1	0	1	0	0	1	0	1010110010
38668	1	1	0	0	0	1	0	0	1	1	1110100010
38667	1	1	0	1	0	0	0	0	1	0	0010110010
38664	1	1	0	1	0	1	0	0	1	1	1110110010
38660	0	0	0	0	1	1	1	0	1	0	1010001100
38655	0	0	0	0	1	0	1	0	1	0	0010001100
38654	1	1	0	0	0	0	0	0	1	1	0110100010
38653	1	1	0	1	0	0	0	0	1	1	0110110010
38652	0	0	1	0	0	1	0	0	1	0	1010000001
38651	0	1	1	0	0	1	0	0	1	0	1010000011
38650	0	0	1	0	1	1	0	0	1	0	1010000101
38649	0	0	1	0	0	1	0	0	1	1	1110000001
38648	0	0	1	0	0	0	0	0	1	0	0010000001
38647	0	1	1	0	0	0	0	0	1	0	0010000011
38646	0	0	1	0	1	0	0	0	1	0	0010000101
38638	0	1	1	0	0	1	0	0	1	1	1110000011
38637	0	0	1	0	1	1	0	0	1	1	1110000101
38636	0	0	1	0	0	0	0	0	1	1	0110000001
38635	0	1	1	0	0	0	0	0	1	1	0110000011
38634	0	0	1	0	1	0	0	0	1	1	0110000101
38631	0	1	0	1	1	0	0	1	1	0	0011010110
38630	0	1	0	1	1	1	0	1	1	0	1011010110
38629	0	0	0	1	1	0	0	1	1	1	0111010100
38628	0	1	0	1	1	0	0	1	1	1	0111010110
38627	0	0	0	1	1	1	0	1	1	1	1111010100
38626	0	1	0	1	1	1	0	1	1	1	1111010110
38624	1	1	0	0	0	1	0	1	1	0	1011100010
38623	0	1	0	0	1	1	1	0	1	0	1010001110
38622	0	0	0	0	1	1	1	0	1	1	1110001100
38621	0	1	0	0	1	0	1	0	1	0	0010001110
38619	1	1	0	0	0	0	0	1	1	0	0011100010
38618	1	0	0	1	1	0	1	1	1	0	0011111100
38616	1	0	0	1	1	1	1	1	1	0	1011111100
38611	0	0	0	0	1	0	1	0	1	1	0110001100
38610	0	1	0	0	1	0	1	0	1	1	0110001110
38609	0	1	0	0	1	1	1	0	1	1	1110001110
38607	1	0	0	1	1	1	1	1	1	1	1111111100
38606	1	0	0	1	1	0	1	1	1	1	0111111100
38599	1	1	0	1	0	1	0	1	1	0	1011110010
38598	1	1	0	1	0	0	0	1	1	0	0011110010
38597	1	1	0	1	0	1	0	1	1	1	1111110010
38595	0	0	0	0	1	1	1	1	1	0	1011001100
38594	0	0	1	0	0	0	0	1	1	0	0011000001
38593	0	1	1	0	0	0	0	1	1	0	0011000011
38592	0	0	1	0	1	0	0	1	1	0	0011000101
38590	0	0	0	0	1	0	1	1	1	0	0011001100
38589	1	1	0	1	0	0	0	1	1	1	0111110010
38588	0	0	1	0	0	1	0	1	1	0	1011000001
38587	0	1	1	0	0	1	0	1	1	0	1011000011
38586	0	0	1	0	1	1	0	1	1	0	1011000101
38585	0	0	1	0	0	1	0	1	1	1	1111000001
38580	0	1	1	0	0	1	0	1	1	1	1111000011
38579	0	0	1	0	1	1	0	1	1	1	1111000101
38578	1	0	1	0	0	1	0	1	1	1	1111100001
38577	0	0	1	0	0	0	0	1	1	1	0111000001
38576	0	1	1	0	0	0	0	1	1	1	0111000011
38575	0	0	1	0	1	0	0	1	1	1	0111000101
38574	1	0	1	0	0	0	0	1	1	1	0111100001
38569	1	0	1	0	0	0	0	0	1	0	0010100001
38564	1	0	1	0	0	1	0	0	1	0	1010100001
38562	0	1	0	0	1	1	1	1	1	0	1011001110
38561	0	0	0	0	1	1	1	1	1	1	1111001100
38560	0	1	0	0	1	0	1	1	1	0	0011001110
38554	0	1	0	0	1	1	1	1	1	1	1111001110
38553	1	0	0	0	1	1	1	1	1	1	1111101100
38552	0	0	0	0	1	0	1	1	1	1	0111001100
38551	0	1	0	0	1	0	1	1	1	1	0111001110
38550	1	0	0	0	1	0	1	1	1	1	0111101100
38547	1	0	0	0	1	0	1	0	1	0	0010101100
38544	1	0	0	0	1	1	1	0	1	0	1010101100
38542	1	0	1	0	1	0	0	0	1	0	0010100101
38541	1	0	1	1	0	0	0	0	1	0	0010110001
38540	1	0	1	0	1	1	0	0	1	0	1010100101
38539	1	0	1	1	0	1	0	0	1	0	1010110001
38538	1	0	1	0	0	1	0	0	1	1	1110100001
38536	1	0	1	0	1	1	0	0	1	1	1110100101
38535	1	0	1	1	0	1	0	0	1	1	1110110001
38534	1	0	1	0	0	0	0	0	1	1	0110100001
38533	1	0	1	0	1	0	0	0	1	1	0110100101
38532	1	0	1	1	0	0	0	0	1	1	0110110001
38531	1	0	0	0	1	1	1	0	1	1	1110101100
38530	1	0	0	0	1	0	1	0	1	1	0110101100
38517	1	0	1	0	0	0	0	1	1	0	0011100001
38514	1	0	1	0	0	1	0	1	1	0	1011100001
38496	1	0	1	0	1	0	0	1	1	0	0011100101
38495	1	0	1	1	0	0	0	1	1	0	0011110001
38494	1	0	1	0	1	1	0	1	1	0	1011100101
38493	1	0	1	1	0	1	0	1	1	0	1011110001
38491	0	0	1	1	0	0	0	0	1	0	0010010001
38490	0	1	1	1	0	0	0	0	1	0	0010010011
38489	0	0	1	1	1	0	0	0	1	0	0010010101
38488	0	0	1	1	0	0	1	0	1	0	0010011001
38487	1	0	0	0	1	0	1	1	1	0	0011101100
38486	1	0	0	0	1	1	1	1	1	0	1011101100
38485	0	0	1	1	0	1	0	0	1	0	1010010001
38484	0	1	1	1	0	1	0	0	1	0	1010010011
38483	0	0	1	1	1	1	0	0	1	0	1010010101
38482	0	0	1	1	0	1	1	0	1	0	1010011001
38479	1	0	1	0	1	1	0	1	1	1	1111100101
38478	1	0	1	1	0	1	0	1	1	1	1111110001
38477	0	0	1	1	0	1	0	0	1	1	1110010001
38476	0	1	1	1	0	1	0	0	1	1	1110010011
38475	0	0	1	1	1	1	0	0	1	1	1110010101
38474	0	0	1	1	0	1	1	0	1	1	1110011001
38473	1	0	1	0	1	0	0	1	1	1	0111100101
38472	1	0	1	1	0	0	0	1	1	1	0111110001
38471	0	0	1	1	0	0	0	0	1	1	0110010001
38470	0	1	1	1	0	0	0	0	1	1	0110010011
38469	0	0	1	1	1	0	0	0	1	1	0110010101
38468	0	0	1	1	0	0	1	0	1	1	0110011001
38465	0	1	0	1	1	1	1	0	1	0	1010011110
38463	1	1	0	0	0	1	1	1	1	1	1111101010
38462	0	1	0	1	1	0	1	0	1	0	0010011110
38460	1	1	0	0	0	0	1	1	1	1	0111101010
38459	0	1	0	1	1	1	1	0	1	1	1110011110
38458	0	1	0	1	1	0	1	0	1	1	0110011110
38448	1	1	0	0	0	0	1	0	1	0	0010101010
38444	1	1	0	0	0	1	1	0	1	0	1010101010
38436	1	1	0	0	1	1	0	0	1	0	1010100110
38434	1	1	0	0	1	0	0	0	1	0	0010100110
38422	1	1	0	0	1	1	0	0	1	1	1110100110
38421	1	1	0	0	1	0	0	0	1	1	0110100110
38411	0	0	1	1	0	1	0	1	1	0	1011010001
38410	0	1	1	1	0	1	0	1	1	0	1011010011
38409	0	0	1	1	1	1	0	1	1	0	1011010101
38408	0	0	1	1	0	1	1	1	1	0	1011011001
38407	0	0	1	1	0	0	0	1	1	0	0011010001
38406	0	1	1	1	0	0	0	1	1	0	0011010011
38405	0	0	1	1	1	0	0	1	1	0	0011010101
38404	0	0	1	1	0	0	1	1	1	0	0011011001
38402	1	1	0	1	0	0	1	0	1	0	0010111010
38400	1	1	0	1	0	1	1	0	1	0	1010111010
38399	1	1	0	0	0	1	1	0	1	1	1110101010
38398	0	0	1	1	0	0	0	1	1	1	0111010001
38397	0	1	1	1	0	0	0	1	1	1	0111010011
38396	0	0	1	1	1	0	0	1	1	1	0111010101
38395	0	0	1	1	0	0	1	1	1	1	0111011001
38394	0	0	1	1	0	1	0	1	1	1	1111010001
38393	0	1	1	1	0	1	0	1	1	1	1111010011
38392	0	0	1	1	1	1	0	1	1	1	1111010101
38391	0	0	1	1	0	1	1	1	1	1	1111011001
38390	1	1	0	1	0	1	1	0	1	1	1110111010
38389	1	1	0	0	0	0	1	0	1	1	0110101010
38388	1	1	0	1	0	0	1	0	1	1	0110111010
38387	0	0	1	0	0	1	1	0	1	0	1010001001
38386	0	1	1	0	0	1	1	0	1	0	1010001011
38385	0	0	1	0	1	1	1	0	1	0	1010001101
38384	0	0	1	0	0	1	1	0	1	1	1110001001
38383	0	0	1	0	0	0	1	0	1	0	0010001001
38382	0	1	1	0	0	0	1	0	1	0	0010001011
38381	0	0	1	0	1	0	1	0	1	0	0010001101
38378	0	1	1	0	0	1	1	0	1	1	1110001011
38377	0	0	1	0	1	1	1	0	1	1	1110001101
38374	0	0	1	0	0	0	1	0	1	1	0110001001
38373	0	1	1	0	0	0	1	0	1	1	0110001011
38372	0	0	1	0	1	0	1	0	1	1	0110001101
38369	0	1	0	1	1	1	1	1	1	0	1011011110
38367	0	1	0	1	1	0	1	1	1	0	0011011110
38361	0	1	0	1	1	0	1	1	1	1	0111011110
38360	0	1	0	1	1	1	1	1	1	1	1111011110
38358	1	1	0	0	0	0	1	1	1	0	0011101010
38356	1	1	0	0	0	1	1	1	1	0	1011101010
38354	1	0	1	1	1	1	0	0	1	0	1010110101
38353	1	0	1	1	0	1	1	0	1	0	1010111001
38350	1	1	0	0	1	1	0	1	1	0	1011100110
38349	1	1	0	0	1	0	0	1	1	0	0011100110
38348	1	0	1	1	1	0	0	0	1	0	0010110101
38347	1	0	1	1	0	0	1	0	1	0	0010111001
38343	1	1	0	0	1	1	0	1	1	1	1111100110
38342	1	1	0	0	1	0	0	1	1	1	0111100110
38338	1	0	1	1	1	1	0	0	1	1	1110110101
38337	1	0	1	1	0	1	1	0	1	1	1110111001
38333	1	0	1	1	1	0	0	0	1	1	0110110101
38332	1	0	1	1	0	0	1	0	1	1	0110111001
38329	1	1	0	1	0	0	1	1	1	0	0011111010
38328	1	1	0	1	0	1	1	1	1	0	1011111010
38326	1	1	0	1	0	1	1	1	1	1	1111111010
38324	0	0	1	0	0	0	1	1	1	0	0011001001
38323	0	1	1	0	0	0	1	1	1	0	0011001011
38322	0	0	1	0	1	0	1	1	1	0	0011001101
38321	0	0	1	0	0	1	1	1	1	0	1011001001
38320	0	1	1	0	0	1	1	1	1	0	1011001011
38319	0	0	1	0	1	1	1	1	1	0	1011001101
38318	0	0	1	0	0	1	1	1	1	1	1111001001
38316	1	1	0	1	0	0	1	1	1	1	0111111010
38311	0	1	1	0	0	1	1	1	1	1	1111001011
38310	0	0	1	0	1	1	1	1	1	1	1111001101
38309	1	0	1	0	0	1	1	1	1	1	1111101001
38305	0	0	1	0	0	0	1	1	1	1	0111001001
38304	0	1	1	0	0	0	1	1	1	1	0111001011
38303	0	0	1	0	1	0	1	1	1	1	0111001101
38302	1	0	1	0	0	0	1	1	1	1	0111101001
38297	1	1	0	1	1	1	0	0	1	0	1010110110
38296	1	1	0	1	1	0	0	0	1	0	0010110110
38292	1	0	1	0	0	0	1	0	1	0	0010101001
38288	1	0	1	0	0	1	1	0	1	0	1010101001
38286	1	1	0	1	1	1	0	0	1	1	1110110110
38285	1	1	0	1	1	0	0	0	1	1	0110110110
38284	0	1	1	0	1	0	0	0	1	0	0010000111
38283	0	1	1	0	1	1	0	0	1	0	1010000111
38279	0	1	1	0	1	1	0	0	1	1	1110000111
38278	1	0	1	1	1	1	0	1	1	0	1011110101
38277	1	0	1	1	0	1	1	1	1	0	1011111001
38276	1	0	1	1	1	0	0	1	1	0	0011110101
38275	1	0	1	1	0	0	1	1	1	0	0011111001
38274	0	1	1	0	1	0	0	0	1	1	0110000111
38273	1	0	1	1	1	1	0	1	1	1	1111110101
38272	1	0	1	1	0	1	1	1	1	1	1111111001
38271	1	0	1	1	1	0	0	1	1	1	0111110101
38270	1	0	1	1	0	0	1	1	1	1	0111111001
38269	1	0	1	0	1	0	1	0	1	0	0010101101
38268	1	0	1	0	1	1	1	0	1	0	1010101101
38267	1	0	1	0	0	1	1	0	1	1	1110101001
38264	1	0	1	0	1	1	1	0	1	1	1110101101
38263	1	0	1	0	0	0	1	0	1	1	0110101001
38262	1	0	1	0	1	0	1	0	1	1	0110101101
38252	1	1	0	1	1	1	0	1	1	0	1011110110
38250	1	1	0	1	1	0	0	1	1	0	0011110110
38244	1	0	1	0	0	1	1	1	1	0	1011101001
38242	1	0	1	0	0	0	1	1	1	0	0011101001
38241	1	1	0	1	1	0	0	1	1	1	0111110110
38240	1	1	0	1	1	1	0	1	1	1	1111110110
38239	0	1	1	0	1	0	0	1	1	0	0011000111
38238	0	1	1	0	1	1	0	1	1	0	1011000111
38231	0	1	1	0	1	1	0	1	1	1	1111000111
38230	0	1	1	0	1	0	0	1	1	1	0111000111
38229	1	1	0	1	1	1	1	0	1	0	1010111110
38228	1	1	0	1	1	0	1	0	1	0	0010111110
38227	0	1	1	1	0	0	1	0	1	0	0010011011
38226	0	0	1	1	1	0	1	0	1	0	0010011101
38225	1	1	0	1	1	1	1	0	1	1	1110111110
38224	1	1	0	1	1	0	1	0	1	1	0110111110
38223	0	1	1	1	0	1	1	0	1	0	1010011011
38222	0	0	1	1	1	1	1	0	1	0	1010011101
38221	1	0	1	0	1	0	1	1	1	0	0011101101
38220	1	0	1	0	1	1	1	1	1	0	1011101101
38219	0	1	1	1	0	1	1	0	1	1	1110011011
38218	0	0	1	1	1	1	1	0	1	1	1110011101
38217	1	0	1	0	1	1	1	1	1	1	1111101101
38216	0	1	1	1	0	0	1	0	1	1	0110011011
38215	0	0	1	1	1	0	1	0	1	1	0110011101
38214	1	0	1	0	1	0	1	1	1	1	0111101101
38201	1	1	0	1	1	1	1	1	1	0	1011111110
38200	1	1	0	1	1	0	1	1	1	0	0011111110
38198	1	1	0	1	1	1	1	1	1	1	1111111110
38195	1	1	0	1	1	0	1	1	1	1	0111111110
38194	0	1	1	1	0	0	1	1	1	0	0011011011
38193	0	0	1	1	1	0	1	1	1	0	0011011101
38192	0	1	1	1	0	1	1	1	1	0	1011011011
38191	0	0	1	1	1	1	1	1	1	0	1011011101
38187	0	1	1	1	0	0	1	1	1	1	0111011011
38186	0	0	1	1	1	0	1	1	1	1	0111011101
38185	0	1	1	1	0	1	1	1	1	1	1111011011
38184	0	0	1	1	1	1	1	1	1	1	1111011101
38179	0	1	1	1	1	0	0	0	1	0	0010010111
38177	0	1	1	1	1	1	0	0	1	0	1010010111
38176	1	1	1	0	0	1	0	1	1	1	1111100011
38175	1	1	1	0	0	0	0	1	1	1	0111100011
38173	0	1	1	1	1	1	0	0	1	1	1110010111
38172	0	1	1	1	1	0	0	0	1	1	0110010111
38167	1	1	1	0	0	0	0	0	1	0	0010100011
38162	1	1	1	0	0	1	0	0	1	0	1010100011
38160	1	0	1	1	1	1	1	0	1	0	1010111101
38157	1	0	1	1	1	0	1	0	1	0	0010111101
38153	1	1	0	0	1	1	1	1	1	1	1111101110
38152	1	1	0	0	1	0	1	1	1	1	0111101110
38151	1	0	1	1	1	1	1	0	1	1	1110111101
38150	1	0	1	1	1	0	1	0	1	1	0110111101
38145	1	1	0	0	1	0	1	0	1	0	0010101110
38142	1	1	0	0	1	1	1	0	1	0	1010101110
38139	1	1	1	0	1	0	0	0	1	0	0010100111
38138	1	1	1	1	0	0	0	0	1	0	0010110011
38136	1	1	1	0	1	1	0	0	1	0	1010100111
38135	1	1	1	1	0	1	0	0	1	0	1010110011
38134	1	1	1	0	0	1	0	0	1	1	1110100011
38130	1	1	1	0	1	1	0	0	1	1	1110100111
38129	1	1	1	1	0	1	0	0	1	1	1110110011
38128	1	1	1	0	0	0	0	0	1	1	0110100011
38127	1	1	1	0	1	0	0	0	1	1	0110100111
38126	1	1	1	1	0	0	0	0	1	1	0110110011
38120	0	1	1	1	1	1	0	1	1	0	1011010111
38118	0	1	1	1	1	0	0	1	1	0	0011010111
38117	1	1	0	0	1	1	1	0	1	1	1110101110
38116	0	1	1	1	1	0	0	1	1	1	0111010111
38115	0	1	1	1	1	1	0	1	1	1	1111010111
38114	1	1	0	0	1	0	1	0	1	1	0110101110
38113	0	1	1	0	1	0	1	0	1	0	0010001111
38112	0	1	1	0	1	1	1	0	1	0	1010001111
38109	1	1	1	0	0	0	0	1	1	0	0011100011
38106	1	1	1	0	0	1	0	1	1	0	1011100011
38105	0	1	1	0	1	1	1	0	1	1	1110001111
38102	1	0	1	1	1	1	1	1	1	0	1011111101
38099	1	0	1	1	1	0	1	1	1	0	0011111101
38098	0	1	1	0	1	0	1	0	1	1	0110001111
38097	1	0	1	1	1	1	1	1	1	1	1111111101
38096	1	0	1	1	1	0	1	1	1	1	0111111101
38095	1	1	0	0	1	0	1	1	1	0	0011101110
38094	1	1	0	0	1	1	1	1	1	0	1011101110
38093	1	1	1	0	1	0	0	1	1	0	0011100111
38092	1	1	1	1	0	0	0	1	1	0	0011110011
38091	1	1	1	0	1	1	0	1	1	0	1011100111
38090	1	1	1	1	0	1	0	1	1	0	1011110011
38089	1	1	1	0	1	0	0	1	1	1	0111100111
38088	1	1	1	1	0	0	0	1	1	1	0111110011
38085	1	1	1	0	1	1	0	1	1	1	1111100111
38084	1	1	1	1	0	1	0	1	1	1	1111110011
38081	0	1	1	0	1	0	1	1	1	0	0011001111
38080	0	1	1	0	1	1	1	1	1	0	1011001111
38079	0	1	1	0	1	1	1	1	1	1	1111001111
38078	0	1	1	0	1	0	1	1	1	1	0111001111
38073	1	1	1	1	1	1	0	0	1	0	1010110111
38072	1	1	1	1	1	0	0	0	1	0	0010110111
38068	1	1	1	1	1	1	0	0	1	1	1110110111
38066	1	1	1	1	1	0	0	0	1	1	0110110111
38063	0	1	1	1	1	0	1	0	1	0	0010011111
38062	0	1	1	1	1	1	1	0	1	0	1010011111
38060	1	1	1	0	0	0	1	1	1	1	0111101011
38058	1	1	1	0	0	1	1	1	1	1	1111101011
38057	0	1	1	1	1	1	1	0	1	1	1110011111
38054	0	1	1	1	1	0	1	0	1	1	0110011111
38049	1	1	1	0	0	0	1	0	1	0	0010101011
38044	1	1	1	0	0	1	1	0	1	0	1010101011
38037	1	1	1	1	1	1	0	1	1	0	1011110111
38036	1	1	1	1	1	0	0	1	1	0	0011110111
38033	1	1	1	1	1	1	0	1	1	1	1111110111
38032	1	1	1	1	1	0	0	1	1	1	0111110111
38029	1	1	1	0	1	0	1	0	1	0	0010101111
38028	1	1	1	1	0	0	1	0	1	0	0010111011
38027	1	1	1	0	1	1	1	0	1	0	1010101111
38026	1	1	1	1	0	1	1	0	1	0	1010111011
38025	1	1	1	0	0	1	1	0	1	1	1110101011
38024	1	1	1	0	1	1	1	0	1	1	1110101111
38023	1	1	1	1	0	1	1	0	1	1	1110111011
38022	1	1	1	0	0	0	1	0	1	1	0110101011
38021	1	1	1	0	1	0	1	0	1	1	0110101111
38020	1	1	1	1	0	0	1	0	1	1	0110111011
38019	0	1	1	1	1	0	1	1	1	0	0011011111
38018	0	1	1	1	1	1	1	1	1	0	1011011111
38017	0	1	1	1	1	0	1	1	1	1	0111011111
38016	0	1	1	1	1	1	1	1	1	1	1111011111
38013	1	1	1	0	0	0	1	1	1	0	0011101011
38010	1	1	1	0	0	1	1	1	1	0	1011101011
38005	1	1	1	0	1	0	1	1	1	0	0011101111
38004	1	1	1	1	0	0	1	1	1	0	0011111011
38003	1	1	1	0	1	1	1	1	1	0	1011101111
38002	1	1	1	1	0	1	1	1	1	0	1011111011
38001	1	1	1	0	1	1	1	1	1	1	1111101111
38000	1	1	1	1	0	1	1	1	1	1	1111111011
37999	1	1	1	0	1	0	1	1	1	1	0111101111
37998	1	1	1	1	0	0	1	1	1	1	0111111011
37993	1	1	1	1	1	1	1	0	1	0	1010111111
37992	1	1	1	1	1	0	1	0	1	0	0010111111
37991	1	1	1	1	1	1	1	0	1	1	1110111111
37990	1	1	1	1	1	0	1	0	1	1	0110111111
37985	1	1	1	1	1	1	1	1	1	0	1011111111
37984	1	1	1	1	1	0	1	1	1	0	0011111111
37983	1	1	1	1	1	1	1	1	1	1	1111111111
37982	1	1	1	1	1	0	1	1	1	1	0111111111
38993	0	0	0	0	0	1	0	0	1	0	1010000000
38992	0	1	0	0	0	1	0	0	1	0	1010000010
38991	0	0	0	0	0	1	0	0	1	1	1110000000
38990	0	0	0	0	0	0	0	0	1	0	0010000000
38989	0	1	0	0	0	0	0	0	1	0	0010000010
38988	0	1	0	0	0	1	0	0	1	1	1110000010
38987	0	0	0	0	0	0	0	0	1	1	0110000000
38986	0	1	0	0	0	0	0	0	1	1	0110000010
38979	0	0	0	0	0	1	0	1	1	0	1011000000
38978	0	1	0	0	0	1	0	1	1	0	1011000010
38977	0	0	0	0	0	1	0	1	1	1	1111000000
38976	0	0	0	0	0	0	0	1	1	0	0011000000
38975	0	1	0	0	0	0	0	1	1	0	0011000010
38974	0	1	0	0	0	1	0	1	1	1	1111000010
38973	1	0	0	0	0	1	0	1	1	1	1111100000
38972	0	0	0	0	0	0	0	1	1	1	0111000000
38971	0	1	0	0	0	0	0	1	1	1	0111000010
38970	1	0	0	0	0	0	0	1	1	1	0111100000
38966	1	0	0	0	0	1	0	0	1	0	1010100000
38961	1	0	0	0	0	0	0	0	1	0	0010100000
38957	1	0	0	1	0	1	0	0	1	0	1010110000
38956	1	0	0	0	0	1	0	0	1	1	1110100000
38955	1	0	0	1	0	0	0	0	1	0	0010110000
38954	1	0	0	1	0	1	0	0	1	1	1110110000
38953	1	0	0	0	0	0	0	0	1	1	0110100000
38952	1	0	0	1	0	0	0	0	1	1	0110110000
38950	1	0	0	0	0	1	0	1	1	0	1011100000
38944	1	0	0	0	0	0	0	1	1	0	0011100000
38929	1	0	0	1	0	1	0	1	1	0	1011110000
38928	0	0	0	1	0	1	0	0	1	0	1010010000
38927	0	1	0	1	0	1	0	0	1	0	1010010010
38913	0	1	0	1	0	1	0	1	0	0	1001010010
38912	0	0	0	1	0	1	1	1	0	0	1001011000
38911	0	1	0	1	0	0	0	1	0	0	0001010010
38910	0	0	0	1	0	0	1	1	0	0	0001011000
38909	0	1	0	1	0	1	0	1	0	1	1101010010
38908	0	0	0	1	0	1	1	1	0	1	1101011000
38907	0	1	0	1	0	0	0	1	0	1	0101010010
38906	0	0	0	1	0	0	1	1	0	1	0101011000
38905	0	0	0	0	0	1	1	0	0	0	1000001000
38904	0	1	0	0	0	1	1	0	0	0	1000001010
38903	0	0	0	0	0	1	1	1	0	0	1001001000
38902	0	0	0	0	0	1	1	0	0	1	1100001000
38901	0	0	0	0	0	0	1	0	0	0	0000001000
38900	0	1	0	0	0	0	1	0	0	0	0000001010
38899	0	0	0	0	0	0	1	1	0	0	0001001000
38898	0	1	0	0	0	1	1	0	0	1	1100001010
38897	0	0	0	0	0	1	1	1	0	1	1101001000
38896	0	0	0	0	0	0	1	0	0	1	0100001000
38895	0	1	0	0	0	0	1	0	0	1	0100001010
38894	0	0	0	0	0	0	1	1	0	1	0101001000
38876	1	0	0	1	0	1	1	0	0	0	1000111000
38874	1	0	0	1	0	0	1	0	0	0	0000111000
38871	1	0	0	1	0	1	1	0	0	1	1100111000
38870	1	0	0	1	0	0	1	0	0	1	0100111000
38868	0	1	0	0	0	1	1	1	0	0	1001001010
38867	0	1	0	0	0	0	1	1	0	0	0001001010
38864	0	1	0	0	0	1	1	1	0	1	1101001010
38863	1	0	0	0	0	1	1	1	0	1	1101101000
38861	0	1	0	0	0	0	1	1	0	1	0101001010
38860	1	0	0	0	0	0	1	1	0	1	0101101000
38859	0	0	0	0	1	1	0	0	0	0	1000000100
38858	0	1	0	0	1	1	0	0	0	0	1000000110
38857	1	0	0	0	1	1	0	0	0	0	1000100100
38856	0	0	0	0	1	1	0	1	0	0	1001000100
38854	0	0	0	0	1	1	0	0	0	1	1100000100
38850	0	0	0	0	1	0	0	0	0	0	0000000100
38849	0	1	0	0	1	0	0	0	0	0	0000000110
38848	1	0	0	0	1	0	0	0	0	0	0000100100
38847	0	0	0	0	1	0	0	1	0	0	0001000100
38843	1	0	0	1	0	1	1	1	0	0	1001111000
38842	0	1	0	0	1	1	0	0	0	1	1100000110
38841	1	0	0	0	1	1	0	0	0	1	1100100100
38840	0	0	0	0	1	1	0	1	0	1	1101000100
38837	1	0	0	1	0	0	1	1	0	0	0001111000
38836	0	0	0	0	1	0	0	0	0	1	0100000100
38835	0	1	0	0	1	0	0	0	0	1	0100000110
38834	1	0	0	0	1	0	0	0	0	1	0100100100
38833	0	0	0	0	1	0	0	1	0	1	0101000100
38829	1	0	0	1	0	1	1	1	0	1	1101111000
38828	1	0	0	1	0	0	1	1	0	1	0101111000
38827	1	0	0	0	0	0	1	0	0	0	0000101000
38826	1	0	0	0	0	0	1	1	0	0	0001101000
38824	1	0	0	0	0	1	1	0	0	0	1000101000
38823	1	0	0	0	0	1	1	1	0	0	1001101000
38821	1	0	0	0	0	1	1	0	0	1	1100101000
38815	1	0	0	0	0	0	1	0	0	1	0100101000
38803	0	1	0	0	1	1	0	1	0	0	1001000110
38802	1	0	0	0	1	1	0	1	0	0	1001100100
38800	0	1	0	0	1	0	0	1	0	0	0001000110
38799	1	0	0	0	1	0	0	1	0	0	0001100100
38797	0	1	0	0	1	1	0	1	0	1	1101000110
38796	1	0	0	0	1	1	0	1	0	1	1101100100
38795	0	1	0	0	1	0	0	1	0	1	0101000110
38794	1	0	0	0	1	0	0	1	0	1	0101100100
38793	0	1	0	1	0	1	1	0	0	0	1000011010
38792	0	0	0	1	1	1	1	0	0	0	1000011100
38791	0	1	0	1	0	0	1	0	0	0	0000011010
38790	0	0	0	1	1	0	1	0	0	0	0000011100
38784	0	1	0	1	0	1	1	0	0	1	1100011010
38783	0	0	0	1	1	1	1	0	0	1	1100011100
38780	0	1	0	1	0	0	1	0	0	1	0100011010
38779	0	0	0	1	1	0	1	0	0	1	0100011100
38773	1	0	0	1	1	1	0	0	0	0	1000110100
38768	1	0	0	1	1	0	0	0	0	0	0000110100
38765	1	0	0	1	1	1	0	0	0	1	1100110100
38762	1	0	0	1	1	0	0	0	0	1	0100110100
38759	0	1	0	1	0	1	1	1	0	0	1001011010
38758	0	0	0	1	1	1	1	1	0	0	1001011100
38756	0	1	0	1	0	0	1	1	0	0	0001011010
38755	0	0	0	1	1	0	1	1	0	0	0001011100
38753	0	1	0	1	0	1	1	1	0	1	1101011010
38752	0	0	0	1	1	1	1	1	0	1	1101011100
38751	0	1	0	1	0	0	1	1	0	1	0101011010
38750	0	0	0	1	1	0	1	1	0	1	0101011100
38749	1	1	0	0	0	1	0	1	0	1	1101100010
38748	1	0	0	1	1	1	0	1	0	0	1001110100
38745	1	1	0	0	0	0	0	1	0	1	0101100010
38744	1	0	0	1	1	0	0	1	0	0	0001110100
38741	0	0	0	1	1	0	0	0	0	0	0000010100
38740	0	1	0	1	1	0	0	0	0	0	0000010110
38739	0	0	0	1	1	0	0	1	0	0	0001010100
38737	0	0	0	1	1	1	0	0	0	0	1000010100
38736	0	1	0	1	1	1	0	0	0	0	1000010110
38735	0	0	0	1	1	1	0	1	0	0	1001010100
38733	1	0	0	1	1	1	0	1	0	1	1101110100
38732	1	0	0	1	1	0	0	1	0	1	0101110100
38727	0	0	0	1	1	0	0	0	0	1	0100010100
38726	0	1	0	1	1	0	0	0	0	1	0100010110
38725	0	0	0	1	1	0	0	1	0	1	0101010100
38724	0	0	0	1	1	1	0	0	0	1	1100010100
38723	0	1	0	1	1	1	0	0	0	1	1100010110
38722	0	0	0	1	1	1	0	1	0	1	1101010100
38721	1	0	0	1	1	1	1	0	0	0	1000111100
38720	1	0	0	1	1	0	1	0	0	0	0000111100
38718	1	0	0	1	1	1	1	0	0	1	1100111100
38714	1	0	0	1	1	0	1	0	0	1	0100111100
38705	1	1	0	0	0	1	0	0	0	0	1000100010
38704	1	1	0	1	0	1	0	0	0	0	1000110010
38703	1	1	0	0	0	1	0	1	0	0	1001100010
38701	1	1	0	0	0	1	0	0	0	1	1100100010
38700	1	1	0	0	0	0	0	0	0	0	0000100010
38699	1	1	0	1	0	0	0	0	0	0	0000110010
38698	1	1	0	0	0	0	0	1	0	0	0001100010
38695	1	1	0	1	0	1	0	0	0	1	1100110010
38693	1	1	0	0	0	0	0	0	0	1	0100100010
38692	1	1	0	1	0	0	0	0	0	1	0100110010
38691	0	0	1	0	0	0	0	0	0	0	0000000001
38690	0	1	1	0	0	0	0	0	0	0	0000000011
38689	0	0	1	0	1	0	0	0	0	0	0000000101
38688	0	0	1	0	0	0	0	1	0	0	0001000001
38687	0	0	1	0	0	1	0	0	0	0	1000000001
38686	0	1	1	0	0	1	0	0	0	0	1000000011
38685	0	0	1	0	1	1	0	0	0	0	1000000101
38684	0	0	1	0	0	1	0	1	0	0	1001000001
38683	0	0	1	0	0	1	0	0	0	1	1100000001
38680	0	1	1	0	0	1	0	0	0	1	1100000011
38679	0	0	1	0	1	1	0	0	0	1	1100000101
38678	0	0	1	0	0	1	0	1	0	1	1101000001
38677	0	0	1	0	0	0	0	0	0	1	0100000001
38676	0	1	1	0	0	0	0	0	0	1	0100000011
38675	0	0	1	0	1	0	0	0	0	1	0100000101
38674	0	0	1	0	0	0	0	1	0	1	0101000001
38673	0	1	0	1	1	0	0	1	0	0	0001010110
38671	0	1	0	1	1	1	0	1	0	0	1001010110
38666	0	1	0	1	1	0	0	1	0	1	0101010110
38665	0	1	0	1	1	1	0	1	0	1	1101010110
38663	0	0	0	0	1	1	1	0	0	0	1000001100
38662	0	1	0	0	1	1	1	0	0	0	1000001110
38661	0	0	0	0	1	1	1	1	0	0	1001001100
38659	0	0	0	0	1	1	1	0	0	1	1100001100
38658	0	0	0	0	1	0	1	0	0	0	0000001100
38657	0	1	0	0	1	0	1	0	0	0	0000001110
38656	0	0	0	0	1	0	1	1	0	0	0001001100
38645	1	0	0	1	1	1	1	1	0	0	1001111100
38644	0	1	0	0	1	1	1	0	0	1	1100001110
38643	0	0	0	0	1	1	1	1	0	1	1101001100
38642	1	0	0	1	1	0	1	1	0	0	0001111100
38641	0	0	0	0	1	0	1	0	0	1	0100001100
38640	0	1	0	0	1	0	1	0	0	1	0100001110
38639	0	0	0	0	1	0	1	1	0	1	0101001100
38633	1	0	0	1	1	1	1	1	0	1	1101111100
38632	1	0	0	1	1	0	1	1	0	1	0101111100
38625	1	1	0	1	0	1	0	1	0	0	1001110010
38620	1	1	0	1	0	0	0	1	0	0	0001110010
38617	1	1	0	1	0	1	0	1	0	1	1101110010
38615	0	1	1	0	0	0	0	1	0	0	0001000011
38614	0	0	1	0	1	0	0	1	0	0	0001000101
38613	0	1	1	0	0	1	0	1	0	0	1001000011
38612	0	0	1	0	1	1	0	1	0	0	1001000101
38608	1	1	0	1	0	0	0	1	0	1	0101110010
38605	0	1	1	0	0	1	0	1	0	1	1101000011
38604	0	0	1	0	1	1	0	1	0	1	1101000101
38603	1	0	1	0	0	1	0	1	0	1	1101100001
38602	0	1	1	0	0	0	0	1	0	1	0101000011
38601	0	0	1	0	1	0	0	1	0	1	0101000101
38600	1	0	1	0	0	0	0	1	0	1	0101100001
38596	0	1	0	0	1	1	1	1	0	0	1001001110
38591	0	1	0	0	1	0	1	1	0	0	0001001110
38584	0	1	0	0	1	1	1	1	0	1	1101001110
38583	1	0	0	0	1	1	1	1	0	1	1101101100
38582	0	1	0	0	1	0	1	1	0	1	0101001110
38581	1	0	0	0	1	0	1	1	0	1	0101101100
38573	1	0	1	0	0	0	0	0	0	0	0000100001
38572	1	0	1	0	1	0	0	0	0	0	0000100101
38571	1	0	1	1	0	0	0	0	0	0	0000110001
38570	1	0	1	0	0	0	0	1	0	0	0001100001
38568	1	0	1	0	0	1	0	0	0	0	1000100001
38567	1	0	1	0	1	1	0	0	0	0	1000100101
38566	1	0	1	1	0	1	0	0	0	0	1000110001
38565	1	0	1	0	0	1	0	1	0	0	1001100001
38563	1	0	1	0	0	1	0	0	0	1	1100100001
38559	1	0	1	0	1	1	0	0	0	1	1100100101
38558	1	0	1	1	0	1	0	0	0	1	1100110001
38557	1	0	1	0	0	0	0	0	0	1	0100100001
38556	1	0	1	0	1	0	0	0	0	1	0100100101
38555	1	0	1	1	0	0	0	0	0	1	0100110001
38549	1	0	0	0	1	0	1	0	0	0	0000101100
38548	1	0	0	0	1	0	1	1	0	0	0001101100
38546	1	0	0	0	1	1	1	0	0	0	1000101100
38545	1	0	0	0	1	1	1	1	0	0	1001101100
38543	1	0	0	0	1	1	1	0	0	1	1100101100
38537	1	0	0	0	1	0	1	0	0	1	0100101100
38529	0	0	1	1	0	1	0	0	0	0	1000010001
38528	0	1	1	1	0	1	0	0	0	0	1000010011
38527	0	0	1	1	1	1	0	0	0	0	1000010101
38526	0	0	1	1	0	1	1	0	0	0	1000011001
38525	0	0	1	1	0	1	0	1	0	0	1001010001
38524	0	0	1	1	0	0	0	0	0	0	0000010001
38523	0	1	1	1	0	0	0	0	0	0	0000010011
38522	0	0	1	1	1	0	0	0	0	0	0000010101
38521	0	0	1	1	0	0	1	0	0	0	0000011001
38520	0	0	1	1	0	0	0	1	0	0	0001010001
38519	1	0	1	0	1	0	0	1	0	0	0001100101
38518	1	0	1	1	0	0	0	1	0	0	0001110001
38516	1	0	1	0	1	1	0	1	0	0	1001100101
38515	1	0	1	1	0	1	0	1	0	0	1001110001
38513	1	0	1	0	1	1	0	1	0	1	1101100101
38512	1	0	1	1	0	1	0	1	0	1	1101110001
38511	0	0	1	1	0	1	0	0	0	1	1100010001
38510	0	1	1	1	0	1	0	0	0	1	1100010011
38509	0	0	1	1	1	1	0	0	0	1	1100010101
38508	0	0	1	1	0	1	1	0	0	1	1100011001
38507	0	0	1	1	0	1	0	1	0	1	1101010001
38506	1	0	1	0	1	0	0	1	0	1	0101100101
38505	1	0	1	1	0	0	0	1	0	1	0101110001
38504	0	0	1	1	0	0	0	0	0	1	0100010001
38503	0	1	1	1	0	0	0	0	0	1	0100010011
38502	0	0	1	1	1	0	0	0	0	1	0100010101
38501	0	0	1	1	0	0	1	0	0	1	0100011001
38500	0	0	1	1	0	0	0	1	0	1	0101010001
38499	1	1	0	0	0	1	1	1	0	1	1101101010
38498	0	1	0	1	1	1	1	0	0	0	1000011110
38497	0	1	0	1	1	0	1	0	0	0	0000011110
38492	1	1	0	0	0	0	1	1	0	1	0101101010
38481	0	1	0	1	1	1	1	0	0	1	1100011110
38480	0	1	0	1	1	0	1	0	0	1	0100011110
38467	1	1	0	0	1	1	0	0	0	0	1000100110
38466	1	1	0	0	1	0	0	0	0	0	0000100110
38464	1	1	0	0	1	1	0	0	0	1	1100100110
38461	1	1	0	0	1	0	0	0	0	1	0100100110
38457	0	1	1	1	0	1	0	1	0	0	1001010011
38456	0	0	1	1	1	1	0	1	0	0	1001010101
38455	0	0	1	1	0	1	1	1	0	0	1001011001
38454	0	1	1	1	0	0	0	1	0	0	0001010011
38453	0	0	1	1	1	0	0	1	0	0	0001010101
38452	0	0	1	1	0	0	1	1	0	0	0001011001
38451	1	1	0	0	0	0	1	0	0	0	0000101010
38450	1	1	0	1	0	0	1	0	0	0	0000111010
38449	1	1	0	0	0	0	1	1	0	0	0001101010
38447	1	1	0	0	0	1	1	0	0	0	1000101010
38446	1	1	0	1	0	1	1	0	0	0	1000111010
38445	1	1	0	0	0	1	1	1	0	0	1001101010
38443	1	1	0	0	0	1	1	0	0	1	1100101010
38442	0	1	1	1	0	1	0	1	0	1	1101010011
38441	0	0	1	1	1	1	0	1	0	1	1101010101
38440	0	0	1	1	0	1	1	1	0	1	1101011001
38439	0	1	1	1	0	0	0	1	0	1	0101010011
38438	0	0	1	1	1	0	0	1	0	1	0101010101
38437	0	0	1	1	0	0	1	1	0	1	0101011001
38435	1	1	0	1	0	1	1	0	0	1	1100111010
38433	1	1	0	0	0	0	1	0	0	1	0100101010
38432	1	1	0	1	0	0	1	0	0	1	0100111010
38431	0	0	1	0	0	1	1	0	0	0	1000001001
38430	0	1	1	0	0	1	1	0	0	0	1000001011
38429	0	0	1	0	1	1	1	0	0	0	1000001101
38428	0	0	1	0	0	1	1	1	0	0	1001001001
38427	0	0	1	0	0	1	1	0	0	1	1100001001
38426	0	0	1	0	0	0	1	0	0	0	0000001001
38425	0	1	1	0	0	0	1	0	0	0	0000001011
38424	0	0	1	0	1	0	1	0	0	0	0000001101
38423	0	0	1	0	0	0	1	1	0	0	0001001001
38420	0	1	1	0	0	1	1	0	0	1	1100001011
38419	0	0	1	0	1	1	1	0	0	1	1100001101
38418	0	0	1	0	0	1	1	1	0	1	1101001001
38417	0	0	1	0	0	0	1	0	0	1	0100001001
38416	0	1	1	0	0	0	1	0	0	1	0100001011
38415	0	0	1	0	1	0	1	0	0	1	0100001101
38414	0	0	1	0	0	0	1	1	0	1	0101001001
38413	0	1	0	1	1	1	1	1	0	0	1001011110
38412	0	1	0	1	1	0	1	1	0	0	0001011110
38403	0	1	0	1	1	1	1	1	0	1	1101011110
38401	0	1	0	1	1	0	1	1	0	1	0101011110
38380	1	1	0	0	1	1	0	1	0	0	1001100110
38379	1	1	0	0	1	0	0	1	0	0	0001100110
38376	1	0	1	1	1	1	0	0	0	0	1000110101
38375	1	0	1	1	0	1	1	0	0	0	1000111001
38371	1	0	1	1	1	0	0	0	0	0	0000110101
38370	1	0	1	1	0	0	1	0	0	0	0000111001
38368	1	1	0	0	1	1	0	1	0	1	1101100110
38366	1	1	0	0	1	0	0	1	0	1	0101100110
38365	1	0	1	1	1	1	0	0	0	1	1100110101
38364	1	0	1	1	0	1	1	0	0	1	1100111001
38363	1	0	1	1	1	0	0	0	0	1	0100110101
38362	1	0	1	1	0	0	1	0	0	1	0100111001
38359	1	1	0	1	0	0	1	1	0	0	0001111010
38357	1	1	0	1	0	1	1	1	0	0	1001111010
38355	1	1	0	1	0	1	1	1	0	1	1101111010
38352	0	1	1	0	0	0	1	1	0	0	0001001011
38351	0	0	1	0	1	0	1	1	0	0	0001001101
38346	1	1	0	1	0	0	1	1	0	1	0101111010
38345	0	1	1	0	0	1	1	1	0	0	1001001011
38344	0	0	1	0	1	1	1	1	0	0	1001001101
38341	0	1	1	0	0	1	1	1	0	1	1101001011
38340	0	0	1	0	1	1	1	1	0	1	1101001101
38339	1	0	1	0	0	1	1	1	0	1	1101101001
38336	0	1	1	0	0	0	1	1	0	1	0101001011
38335	0	0	1	0	1	0	1	1	0	1	0101001101
38334	1	0	1	0	0	0	1	1	0	1	0101101001
38331	1	1	0	1	1	1	0	0	0	0	1000110110
38330	1	1	0	1	1	0	0	0	0	0	0000110110
38327	1	1	0	1	1	1	0	0	0	1	1100110110
38325	0	1	1	0	1	1	0	0	0	0	1000000111
38317	1	1	0	1	1	0	0	0	0	1	0100110110
38315	0	1	1	0	1	0	0	0	0	0	0000000111
38314	0	1	1	0	1	1	0	0	0	1	1100000111
38313	1	0	1	1	1	1	0	1	0	0	1001110101
38312	1	0	1	1	0	1	1	1	0	0	1001111001
38308	0	1	1	0	1	0	0	0	0	1	0100000111
38307	1	0	1	1	1	0	0	1	0	0	0001110101
38306	1	0	1	1	0	0	1	1	0	0	0001111001
38301	1	0	1	1	1	1	0	1	0	1	1101110101
38300	1	0	1	1	0	1	1	1	0	1	1101111001
38299	1	0	1	1	1	0	0	1	0	1	0101110101
38298	1	0	1	1	0	0	1	1	0	1	0101111001
38295	1	0	1	0	0	0	1	0	0	0	0000101001
38294	1	0	1	0	1	0	1	0	0	0	0000101101
38293	1	0	1	0	0	0	1	1	0	0	0001101001
38291	1	0	1	0	0	1	1	0	0	0	1000101001
38290	1	0	1	0	1	1	1	0	0	0	1000101101
38289	1	0	1	0	0	1	1	1	0	0	1001101001
38287	1	0	1	0	0	1	1	0	0	1	1100101001
38282	1	0	1	0	1	1	1	0	0	1	1100101101
38281	1	0	1	0	0	0	1	0	0	1	0100101001
38280	1	0	1	0	1	0	1	0	0	1	0100101101
38266	1	1	0	1	1	1	0	1	0	0	1001110110
38265	1	1	0	1	1	0	0	1	0	0	0001110110
38261	1	1	0	1	1	1	0	1	0	1	1101110110
38260	1	1	0	1	1	0	0	1	0	1	0101110110
38259	0	1	1	0	1	0	0	1	0	0	0001000111
38258	0	1	1	0	1	1	0	1	0	0	1001000111
38257	0	1	1	0	1	1	0	1	0	1	1101000111
38256	0	1	1	0	1	0	0	1	0	1	0101000111
38255	1	1	0	1	1	1	1	0	0	0	1000111110
38254	1	1	0	1	1	0	1	0	0	0	0000111110
38253	1	1	0	1	1	0	1	0	0	1	0100111110
38251	1	1	0	1	1	1	1	0	0	1	1100111110
38249	0	1	1	1	0	1	1	0	0	0	1000011011
38248	0	0	1	1	1	1	1	0	0	0	1000011101
38247	0	1	1	1	0	0	1	0	0	0	0000011011
38246	0	0	1	1	1	0	1	0	0	0	0000011101
38245	1	0	1	0	1	1	1	1	0	0	1001101101
38243	1	0	1	0	1	0	1	1	0	0	0001101101
38237	1	0	1	0	1	1	1	1	0	1	1101101101
38236	0	1	1	1	0	0	1	0	0	1	0100011011
38235	0	0	1	1	1	0	1	0	0	1	0100011101
38234	0	1	1	1	0	1	1	0	0	1	1100011011
38233	0	0	1	1	1	1	1	0	0	1	1100011101
38232	1	0	1	0	1	0	1	1	0	1	0101101101
38213	1	1	0	1	1	1	1	1	0	0	1001111110
38212	1	1	0	1	1	0	1	1	0	0	0001111110
38211	1	1	0	1	1	1	1	1	0	1	1101111110
38210	1	1	0	1	1	0	1	1	0	1	0101111110
38209	0	1	1	1	0	1	1	1	0	0	1001011011
38208	0	0	1	1	1	1	1	1	0	0	1001011101
38207	0	1	1	1	0	0	1	1	0	0	0001011011
38206	0	0	1	1	1	0	1	1	0	0	0001011101
38205	0	1	1	1	0	1	1	1	0	1	1101011011
38204	0	0	1	1	1	1	1	1	0	1	1101011101
38203	0	1	1	1	0	0	1	1	0	1	0101011011
38202	0	0	1	1	1	0	1	1	0	1	0101011101
38199	1	1	1	0	0	1	0	1	0	1	1101100011
38197	1	1	1	0	0	0	0	1	0	1	0101100011
38196	0	1	1	1	1	0	0	0	0	0	0000010111
38190	0	1	1	1	1	1	0	0	0	0	1000010111
38189	0	1	1	1	1	1	0	0	0	1	1100010111
38188	0	1	1	1	1	0	0	0	0	1	0100010111
38183	1	0	1	1	1	1	1	0	0	0	1000111101
38182	1	0	1	1	1	0	1	0	0	0	0000111101
38181	1	1	0	0	1	1	1	1	0	1	1101101110
38180	1	1	0	0	1	0	1	1	0	1	0101101110
38178	1	0	1	1	1	0	1	0	0	1	0100111101
38174	1	0	1	1	1	1	1	0	0	1	1100111101
38171	1	1	1	0	0	0	0	0	0	0	0000100011
38170	1	1	1	0	1	0	0	0	0	0	0000100111
38169	1	1	1	1	0	0	0	0	0	0	0000110011
38168	1	1	1	0	0	0	0	1	0	0	0001100011
38166	1	1	1	0	0	1	0	0	0	0	1000100011
38165	1	1	1	0	1	1	0	0	0	0	1000100111
38164	1	1	1	1	0	1	0	0	0	0	1000110011
38163	1	1	1	0	0	1	0	1	0	0	1001100011
38161	1	1	1	0	0	1	0	0	0	1	1100100011
38159	1	1	1	0	1	1	0	0	0	1	1100100111
38158	1	1	1	1	0	1	0	0	0	1	1100110011
38156	1	1	1	0	0	0	0	0	0	1	0100100011
38155	1	1	1	0	1	0	0	0	0	1	0100100111
38154	1	1	1	1	0	0	0	0	0	1	0100110011
38149	0	1	1	1	1	1	0	1	0	0	1001010111
38148	0	1	1	1	1	0	0	1	0	0	0001010111
38147	1	1	0	0	1	0	1	0	0	0	0000101110
38146	1	1	0	0	1	0	1	1	0	0	0001101110
38144	1	1	0	0	1	1	1	0	0	0	1000101110
38143	1	1	0	0	1	1	1	1	0	0	1001101110
38141	1	1	0	0	1	1	1	0	0	1	1100101110
38140	0	1	1	1	1	1	0	1	0	1	1101010111
38137	0	1	1	1	1	0	0	1	0	1	0101010111
38133	1	1	0	0	1	0	1	0	0	1	0100101110
38132	0	1	1	0	1	0	1	0	0	0	0000001111
38131	0	1	1	0	1	1	1	0	0	0	1000001111
38125	0	1	1	0	1	1	1	0	0	1	1100001111
38124	1	0	1	1	1	1	1	1	0	0	1001111101
38123	0	1	1	0	1	0	1	0	0	1	0100001111
38122	1	0	1	1	1	0	1	1	0	0	0001111101
38121	1	0	1	1	1	1	1	1	0	1	1101111101
38119	1	0	1	1	1	0	1	1	0	1	0101111101
38111	1	1	1	0	1	0	0	1	0	0	0001100111
38110	1	1	1	1	0	0	0	1	0	0	0001110011
38108	1	1	1	0	1	1	0	1	0	0	1001100111
38107	1	1	1	1	0	1	0	1	0	0	1001110011
38104	1	1	1	0	1	1	0	1	0	1	1101100111
38103	1	1	1	1	0	1	0	1	0	1	1101110011
38101	1	1	1	0	1	0	0	1	0	1	0101100111
38100	1	1	1	1	0	0	0	1	0	1	0101110011
38087	0	1	1	0	1	0	1	1	0	0	0001001111
38086	0	1	1	0	1	1	1	1	0	0	1001001111
38083	0	1	1	0	1	1	1	1	0	1	1101001111
38082	0	1	1	0	1	0	1	1	0	1	0101001111
38077	1	1	1	1	1	1	0	0	0	0	1000110111
38076	1	1	1	1	1	0	0	0	0	0	0000110111
38075	1	1	1	1	1	1	0	0	0	1	1100110111
38074	1	1	1	1	1	0	0	0	0	1	0100110111
38071	0	1	1	1	1	0	1	0	0	0	0000011111
38070	0	1	1	1	1	1	1	0	0	0	1000011111
38069	1	1	1	0	0	1	1	1	0	1	1101101011
38067	1	1	1	0	0	0	1	1	0	1	0101101011
38065	0	1	1	1	1	1	1	0	0	1	1100011111
38064	0	1	1	1	1	0	1	0	0	1	0100011111
38061	1	1	1	1	1	0	0	1	0	0	0001110111
38059	1	1	1	1	1	1	0	1	0	0	1001110111
38056	1	1	1	1	1	1	0	1	0	1	1101110111
38055	1	1	1	1	1	0	0	1	0	1	0101110111
38053	1	1	1	0	0	0	1	0	0	0	0000101011
38052	1	1	1	0	1	0	1	0	0	0	0000101111
38051	1	1	1	1	0	0	1	0	0	0	0000111011
38050	1	1	1	0	0	0	1	1	0	0	0001101011
38048	1	1	1	0	0	1	1	0	0	0	1000101011
38047	1	1	1	0	1	1	1	0	0	0	1000101111
38046	1	1	1	1	0	1	1	0	0	0	1000111011
38045	1	1	1	0	0	1	1	1	0	0	1001101011
38043	1	1	1	0	0	1	1	0	0	1	1100101011
38042	1	1	1	0	1	1	1	0	0	1	1100101111
38041	1	1	1	1	0	1	1	0	0	1	1100111011
38040	1	1	1	0	0	0	1	0	0	1	0100101011
38039	1	1	1	0	1	0	1	0	0	1	0100101111
38038	1	1	1	1	0	0	1	0	0	1	0100111011
38035	0	1	1	1	1	0	1	1	0	0	0001011111
38034	0	1	1	1	1	1	1	1	0	0	1001011111
38031	0	1	1	1	1	1	1	1	0	1	1101011111
38030	0	1	1	1	1	0	1	1	0	1	0101011111
38015	1	1	1	0	1	0	1	1	0	0	0001101111
38014	1	1	1	1	0	0	1	1	0	0	0001111011
38012	1	1	1	0	1	1	1	1	0	0	1001101111
38011	1	1	1	1	0	1	1	1	0	0	1001111011
38009	1	1	1	0	1	1	1	1	0	1	1101101111
38008	1	1	1	1	0	1	1	1	0	1	1101111011
38007	1	1	1	0	1	0	1	1	0	1	0101101111
38006	1	1	1	1	0	0	1	1	0	1	0101111011
37997	1	1	1	1	1	1	1	0	0	0	1000111111
37996	1	1	1	1	1	0	1	0	0	0	0000111111
37995	1	1	1	1	1	1	1	0	0	1	1100111111
37994	1	1	1	1	1	0	1	0	0	1	0100111111
37989	1	1	1	1	1	1	1	1	0	0	1001111111
37988	1	1	1	1	1	0	1	1	0	0	0001111111
37987	1	1	1	1	1	1	1	1	0	1	1101111111
37986	1	1	1	1	1	0	1	1	0	1	0101111111
39005	0	0	0	0	0	0	0	0	0	0	0000000000
39004	0	1	0	0	0	0	0	0	0	0	0000000010
39003	0	0	0	0	0	0	0	1	0	0	0001000000
39002	0	0	0	0	0	1	0	0	0	0	1000000000
39001	0	1	0	0	0	1	0	0	0	0	1000000010
39000	0	0	0	0	0	1	0	1	0	0	1001000000
38999	0	0	0	0	0	1	0	0	0	1	1100000000
38998	0	1	0	0	0	1	0	0	0	1	1100000010
38997	0	0	0	0	0	1	0	1	0	1	1101000000
38996	0	0	0	0	0	0	0	0	0	1	0100000000
38995	0	1	0	0	0	0	0	0	0	1	0100000010
38994	0	0	0	0	0	0	0	1	0	1	0101000000
38985	0	1	0	0	0	0	0	1	0	0	0001000010
38984	0	1	0	0	0	1	0	1	0	0	1001000010
38983	0	1	0	0	0	1	0	1	0	1	1101000010
38982	1	0	0	0	0	1	0	1	0	1	1101100000
38981	0	1	0	0	0	0	0	1	0	1	0101000010
38980	1	0	0	0	0	0	0	1	0	1	0101100000
38969	1	0	0	0	0	1	0	0	0	0	1000100000
38968	1	0	0	1	0	1	0	0	0	0	1000110000
38967	1	0	0	0	0	1	0	1	0	0	1001100000
38965	1	0	0	0	0	1	0	0	0	1	1100100000
38964	1	0	0	0	0	0	0	0	0	0	0000100000
38963	1	0	0	1	0	0	0	0	0	0	0000110000
38962	1	0	0	0	0	0	0	1	0	0	0001100000
38960	1	0	0	1	0	1	0	0	0	1	1100110000
38959	1	0	0	0	0	0	0	0	0	1	0100100000
38958	1	0	0	1	0	0	0	0	0	1	0100110000
38951	1	0	0	1	0	1	0	1	0	0	1001110000
38949	0	0	0	1	0	1	0	0	0	0	1000010000
38948	0	1	0	1	0	1	0	0	0	0	1000010010
38947	0	0	0	1	0	1	1	0	0	0	1000011000
38946	0	0	0	1	0	1	0	1	0	0	1001010000
38945	1	0	0	1	0	0	0	1	0	0	0001110000
38943	0	0	0	1	0	0	0	0	0	0	0000010000
38942	0	1	0	1	0	0	0	0	0	0	0000010010
38941	0	0	0	1	0	0	1	0	0	0	0000011000
38940	0	0	0	1	0	0	0	1	0	0	0001010000
38939	1	0	0	1	0	1	0	1	0	1	1101110000
38938	0	0	0	1	0	1	0	0	0	1	1100010000
38937	0	1	0	1	0	1	0	0	0	1	1100010010
38936	0	0	0	1	0	1	1	0	0	1	1100011000
38935	0	0	0	1	0	1	0	1	0	1	1101010000
38934	1	0	0	1	0	0	0	1	0	1	0101110000
38933	0	0	0	1	0	0	0	0	0	1	0100010000
38932	0	1	0	1	0	0	0	0	0	1	0100010010
38931	0	0	0	1	0	0	1	0	0	1	0100011000
38930	0	0	0	1	0	0	0	1	0	1	0101010000
