# Supplementary material
Source: publisher figshare collection journal article supplement (https://springernature.figshare.com/ndownloader/files/17562821)
Supplement: Supplementary file 1 [file 17562821 › CytoscapeSession-2018_09_25-21_15/tables/37972-STG%2C+Model+1/LOCAL_ATTRS-org.cytoscape.model.CyEdge-STG%2C+Model+1+default++edge.cytable]

CyCSV-Version	1
SUID	EdgeBetweenness	interaction	name	selected
java.lang.Long	java.lang.Double	java.lang.String	java.lang.String	java.lang.Boolean
	mutable
STG, Model 1 default edge
39006	41.1589601	1	0111111111 (1) 0011111111	false
39007	29.30934799	1	0111111111 (1) 0101111111	false
39008	113.50104258	1	0111111111 (1) 0110111111	false
39009	25.83518189	1	0111111111 (1) 0111110111	false
39010	36.9896095	1	0111111111 (1) 0111111101	false
39011	206.22349775	1	1111111111 (1) 1011111111	false
39012	71.61140106	1	1111111111 (1) 1101111111	false
39013	633.404557	1	1111111111 (1) 1110111111	false
39014	52.1794452	1	1111111111 (1) 1111110111	false
39015	88.74440533	1	1111111111 (1) 1111111101	false
39016	114.53216576	1	0011111111 (1) 0010111111	false
39017	71.96275785	1	0011111111 (1) 0011011111	false
39018	23.3803713	1	0011111111 (1) 0011110111	false
39019	43.55148999	1	0011111111 (1) 0011111101	false
39020	201.15027825	1	1011111111 (1) 1010111111	false
39021	348.16431407	1	1011111111 (1) 1011011111	false
39022	25.82762802	1	1011111111 (1) 1011110111	false
39023	100.5233422	1	1011111111 (1) 1011111101	false
39024	331.31120258	1	0101111111 (1) 0001111111	false
39025	40.79802987	1	0101111111 (1) 0101110111	false
39026	46.15682271	1	0101111111 (1) 0101111101	false
39027	1273.11297497	1	1101111111 (1) 1001111111	false
39028	63.24579533	1	1101111111 (1) 1101110111	false
39029	147.34829203	1	1101111111 (1) 1101111101	false
39030	222.05273037	1	0001111111 (1) 0011111111	false
39031	102.59100058	1	0001111111 (1) 0001011111	false
39032	29.2687041	1	0001111111 (1) 0001110111	false
39033	62.10167898	1	0001111111 (1) 0001111101	false
39034	527.09208584	1	1001111111 (1) 1011111111	false
39035	602.52781201	1	1001111111 (1) 1001011111	false
39036	35.9606668	1	1001111111 (1) 1001110111	false
39037	172.91516894	1	1001111111 (1) 1001111101	false
39038	18.99114893	1	0110111111 (1) 0010111111	false
39039	105.25023582	1	0110111111 (1) 0100111111	false
39040	87.43401247	1	0110111111 (1) 0110011111	false
39041	20.9428275	1	0110111111 (1) 0110110111	false
39042	52.90928441	1	0110111111 (1) 0110111101	false
39043	94.74930873	1	1110111111 (1) 1010111111	false
39044	599.0435441	1	1110111111 (1) 1100111111	false
39045	392.21865997	1	1110111111 (1) 1110011111	false
39046	32.21003426	1	1110111111 (1) 1110110111	false
39047	98.29420148	1	1110111111 (1) 1110111101	false
39048	43.20513796	1	0010111111 (1) 0010011111	false
39049	17.49328847	1	0010111111 (1) 0010110111	false
39050	27.07479511	1	0010111111 (1) 0010111101	false
39051	151.22762807	1	1010111111 (1) 1010011111	false
39052	18.09027808	1	1010111111 (1) 1010110111	false
39053	51.87013084	1	1010111111 (1) 1010111101	false
39054	65.90912012	1	0100111111 (1) 0000111111	false
39055	25.00953336	1	0100111111 (1) 0101111111	false
39056	89.53585847	1	0100111111 (1) 0100011111	false
39057	22.0631206	1	0100111111 (1) 0100110111	false
39058	48.41421531	1	0100111111 (1) 0100111101	false
39059	425.53923807	1	1100111111 (1) 1000111111	false
39060	52.811601	1	1100111111 (1) 1101111111	false
39061	288.90028765	1	1100111111 (1) 1100011111	false
39062	32.04625076	1	1100111111 (1) 1100110111	false
39063	93.74321112	1	1100111111 (1) 1100111101	false
39064	16.41111403	1	0000111111 (1) 0010111111	false
39065	35.5825699	1	0000111111 (1) 0001111111	false
39066	47.11804156	1	0000111111 (1) 0000011111	false
39067	17.90690177	1	0000111111 (1) 0000110111	false
39068	32.6608173	1	0000111111 (1) 0000111101	false
39069	23.98697978	1	1000111111 (1) 1010111111	false
39070	72.34368767	1	1000111111 (1) 1001111111	false
39071	163.12556929	1	1000111111 (1) 1000011111	false
39072	21.00948995	1	1000111111 (1) 1000110111	false
39073	65.74396176	1	1000111111 (1) 1000111101	false
39074	56.38798401	1	0111111011 (1) 0011111011	false
39075	28.81219667	1	0111111011 (1) 0101111011	false
39076	148.09518912	1	0111111011 (1) 0110111011	false
39077	65.64543007	1	0111111011 (1) 0111110011	false
39078	39.06105194	1	0111111011 (1) 0111111111	false
39079	43.67437325	1	0111111011 (1) 0111111001	false
39080	44.76650899	1	0111101111 (1) 0011101111	false
39081	33.45579987	1	0111101111 (1) 0101101111	false
39082	117.86726428	1	0111101111 (1) 0110101111	false
39083	52.56764814	1	0111101111 (1) 0111111111	false
39084	29.14894013	1	0111101111 (1) 0111100111	false
39085	52.56764814	1	0111101111 (1) 0111101101	false
39086	187.10959324	1	1111111011 (1) 1011111011	false
39087	46.84706186	1	1111111011 (1) 1101111011	false
39088	422.92707726	1	1111111011 (1) 1110111011	false
39089	111.43047874	1	1111111011 (1) 1111110011	false
39090	69.10656814	1	1111111011 (1) 1111111111	false
39091	81.0101842	1	1111111011 (1) 1111111001	false
39092	77.03607337	1	1111101111 (1) 1101101111	false
39093	1377.41720207	1	1111101111 (1) 1110101111	false
39094	1057.71741685	1	1111101111 (1) 1111111111	false
39095	86.53259707	1	1111101111 (1) 1111100111	false
39096	193.00166416	1	1111101111 (1) 1111101101	false
39097	227.38640786	1	1011111011 (1) 1010111011	false
39098	981.96535313	1	1011111011 (1) 1011011011	false
39099	172.17880727	1	1011111011 (1) 1011110011	false
39100	73.27196134	1	1011111011 (1) 1011111111	false
39101	198.48610358	1	1011111011 (1) 1011111001	false
39102	83.91713048	1	1011101111 (1) 1111101111	false
39103	47.25906044	1	1011101111 (1) 1010101111	false
39104	18.27861577	1	1011101111 (1) 1011001111	false
39105	16.07801761	1	1011101111 (1) 1011111111	false
39106	20.14042234	1	1011101111 (1) 1011100111	false
39107	39.28984454	1	1011101111 (1) 1011101101	false
39108	118.31366983	1	0011111011 (1) 0010111011	false
39109	126.02336389	1	0011111011 (1) 0011011011	false
39110	82.02310042	1	0011111011 (1) 0011110011	false
39111	39.92360158	1	0011111011 (1) 0011111111	false
39112	65.12783689	1	0011111011 (1) 0011111001	false
39113	123.80084499	1	0011101111 (1) 0010101111	false
39114	15.07492956	1	0011101111 (1) 0011001111	false
39115	46.29149284	1	0011101111 (1) 0011111111	false
39116	18.47449252	1	0011101111 (1) 0011100111	false
39117	46.29149284	1	0011101111 (1) 0011101101	false
39118	343.74055797	1	0101111011 (1) 0001111011	false
39119	83.90383672	1	0101111011 (1) 0101110011	false
39120	53.76599278	1	0101111011 (1) 0101111111	false
39121	46.07567614	1	0101111011 (1) 0101111001	false
39122	422.26126813	1	0101101111 (1) 0001101111	false
39123	82.14404483	1	0101101111 (1) 0101111111	false
39124	42.92330134	1	0101101111 (1) 0101100111	false
39125	82.14404483	1	0101101111 (1) 0101101101	false
39126	1732.88550105	1	1101111011 (1) 1001111011	false
39127	212.9023551	1	1101111011 (1) 1101110011	false
39128	129.92869383	1	1101111011 (1) 1101111111	false
39129	180.733173	1	1101111011 (1) 1101111001	false
39130	974.69537359	1	1101101111 (1) 1101111111	false
39131	63.02994066	1	1101101111 (1) 1101100111	false
39132	123.30908116	1	1101101111 (1) 1101101101	false
39133	90.02469969	1	1011101011 (1) 1111101011	false
39134	68.16025956	1	1011101011 (1) 1010101011	false
39135	31.9175936	1	1011101011 (1) 1011001011	false
39136	30.99355134	1	1011101011 (1) 1011111011	false
39137	47.73475467	1	1011101011 (1) 1011100011	false
39138	34.48611792	1	1011101011 (1) 1011101111	false
39139	62.96681544	1	1011101011 (1) 1011101001	false
39140	1339.18548858	1	1001111011 (1) 1011111011	false
39141	132.13148528	1	1001111011 (1) 1001011011	false
39142	196.91966462	1	1001111011 (1) 1001110011	false
39143	122.49579575	1	1001111011 (1) 1001111111	false
39144	201.73618291	1	1001111011 (1) 1001111001	false
39145	9.31851852	1	1001101111 (1) 1101101111	false
39146	83.47697326	1	1001101111 (1) 1011101111	false
39147	14.71335018	1	1001101111 (1) 1001001111	false
39148	17.5432752	1	1001101111 (1) 1001111111	false
39149	16.43997031	1	1001101111 (1) 1001100111	false
39150	32.50200428	1	1001101111 (1) 1001101101	false
39151	110.62894546	1	0011101011 (1) 0010101011	false
39152	46.24454418	1	0011101011 (1) 0011001011	false
39153	67.10684665	1	0011101011 (1) 0011111011	false
39154	53.55911261	1	0011101011 (1) 0011100011	false
39155	37.30427215	1	0011101011 (1) 0011101111	false
39156	67.10684665	1	0011101011 (1) 0011101001	false
39157	268.91674195	1	0001111011 (1) 0011111011	false
39158	41.22592342	1	0001111011 (1) 0001011011	false
39159	87.39756661	1	0001111011 (1) 0001110011	false
39160	55.67644455	1	0001111011 (1) 0001111111	false
39161	59.69378386	1	0001111011 (1) 0001111001	false
39162	251.86247162	1	0001101111 (1) 0011101111	false
39163	19.33633065	1	0001101111 (1) 0001001111	false
39164	72.44389701	1	0001101111 (1) 0001111111	false
39165	24.8722822	1	0001101111 (1) 0001100111	false
39166	72.44389701	1	0001101111 (1) 0001101101	false
39167	16.2348919	1	1111011111 (1) 1011011111	false
39168	23.66296017	1	1111011111 (1) 1101011111	false
39169	27.12503836	1	1111011111 (1) 1110011111	false
39170	72.33932135	1	1111011111 (1) 1111111111	false
39171	32.08616083	1	1111011111 (1) 1111001111	false
39172	32.05851589	1	1111011111 (1) 1111010111	false
39173	10.77943682	1	0111011111 (1) 0011011111	false
39174	22.40849279	1	0111011111 (1) 0101011111	false
39175	25.46490551	1	0111011111 (1) 0110011111	false
39176	66.16544199	1	0111011111 (1) 0111111111	false
39177	59.12018132	1	0111011111 (1) 0111001111	false
39178	31.43691842	1	0111011111 (1) 0111010111	false
39179	136.72186873	1	1011011111 (1) 1010011111	false
39180	1231.76476612	1	1011011111 (1) 1011001111	false
39181	337.34535125	1	1011011111 (1) 1011010111	false
39182	90.48053987	1	0011011111 (1) 0010011111	false
39183	111.22252617	1	0011011111 (1) 0011001111	false
39184	226.96665619	1	0011011111 (1) 0011010111	false
39185	24.6724771	1	0110111011 (1) 0010111011	false
39186	127.88681053	1	0110111011 (1) 0100111011	false
39187	82.32768361	1	0110111011 (1) 0110011011	false
39188	68.20204675	1	0110111011 (1) 0110110011	false
39189	42.78135406	1	0110111011 (1) 0110111111	false
39190	58.84650589	1	0110111011 (1) 0110111001	false
39191	17.90248601	1	0110101111 (1) 0010101111	false
39192	97.29195396	1	0110101111 (1) 0100101111	false
39193	17.3134168	1	0110101111 (1) 0110001111	false
39194	48.24511248	1	0110101111 (1) 0110111111	false
39195	19.90355215	1	0110101111 (1) 0110100111	false
39196	48.24511248	1	0110101111 (1) 0110101101	false
39197	22.42228148	1	0110101011 (1) 0010101011	false
39198	120.48104689	1	0110101011 (1) 0100101011	false
39199	16.30275054	1	0110101011 (1) 0110001011	false
39200	59.62168882	1	0110101011 (1) 0110111011	false
39201	47.30057491	1	0110101011 (1) 0110100011	false
39202	40.03436962	1	0110101011 (1) 0110101111	false
39203	59.62168882	1	0110101011 (1) 0110101001	false
39204	74.92884243	1	1110111011 (1) 1010111011	false
39205	405.47482416	1	1110111011 (1) 1100111011	false
39206	201.98061805	1	1110111011 (1) 1110011011	false
39207	111.95576875	1	1110111011 (1) 1110110011	false
39208	71.28390954	1	1110111011 (1) 1110111111	false
39209	87.8108449	1	1110111011 (1) 1110111001	false
39210	585.92262396	1	1110101111 (1) 1100101111	false
39211	18.55948959	1	1110101111 (1) 1110001111	false
39212	658.827282	1	1110101111 (1) 1110111111	false
39213	34.5422114	1	1110101111 (1) 1110100111	false
39214	130.35939395	1	1110101111 (1) 1110101101	false
39215	394.29448131	1	1110101011 (1) 1100101011	false
39216	15.45536305	1	1110101011 (1) 1110001011	false
39217	434.50773056	1	1110101011 (1) 1110111011	false
39218	100.73990006	1	1110101011 (1) 1110100011	false
39219	73.5479857	1	1110101011 (1) 1110101111	false
39220	103.25962045	1	1110101011 (1) 1110101001	false
39221	262.84623464	1	1010111011 (1) 1010011011	false
39222	79.41960991	1	1010111011 (1) 1010110011	false
39223	35.79888735	1	1010111011 (1) 1010111111	false
39224	89.92972188	1	1010111011 (1) 1010111001	false
39225	124.24581311	1	1010101111 (1) 1110101111	false
39226	12.33339349	1	1010101111 (1) 1010001111	false
39227	12.50258289	1	1010101111 (1) 1010111111	false
39228	16.53067533	1	1010101111 (1) 1010100111	false
39229	32.81756954	1	1010101111 (1) 1010101101	false
39230	106.88508698	1	0010111011 (1) 0010011011	false
39231	57.05623303	1	0010111011 (1) 0010110011	false
39232	24.70290299	1	0010111011 (1) 0010111111	false
39233	49.9746991	1	0010111011 (1) 0010111001	false
39234	10.78572261	1	0010101111 (1) 0010001111	false
39235	26.13588984	1	0010101111 (1) 0010111111	false
39236	12.65417829	1	0010101111 (1) 0010100111	false
39237	26.13588984	1	0010101111 (1) 0010101101	false
39238	63.65242136	1	0101011111 (1) 0001011111	false
39239	295.0371362	1	0101011111 (1) 0101111111	false
39240	160.99919044	1	0101011111 (1) 0101001111	false
39241	82.83699721	1	0101011111 (1) 0101010111	false
39242	222.54690828	1	1101011111 (1) 1001011111	false
39243	401.65999285	1	1101011111 (1) 1101111111	false
39244	65.95034603	1	1101011111 (1) 1101001111	false
39245	164.493285	1	1101011111 (1) 1101010111	false
39246	28.02296811	1	0111110111 (1) 0011110111	false
39247	29.21788944	1	0111110111 (1) 0101110111	false
39248	79.90458376	1	0111110111 (1) 0110110111	false
39249	132.71325492	1	0111110111 (1) 0111110101	false
39250	58.11419268	1	1111110111 (1) 1011110111	false
39251	54.56477132	1	1111110111 (1) 1101110111	false
39252	130.77295906	1	1111110111 (1) 1110110111	false
39253	236.11108275	1	1111110111 (1) 1111110101	false
39254	691.22692742	1	1001011111 (1) 1011011111	false
39255	823.86957584	1	1001011111 (1) 1001001111	false
39256	459.07247398	1	1001011111 (1) 1001010111	false
39257	192.61541214	1	0001011111 (1) 0011011111	false
39258	131.15997013	1	0001011111 (1) 0001001111	false
39259	274.16545123	1	0001011111 (1) 0001010111	false
39260	77.88002899	1	0011110111 (1) 0010110111	false
39261	239.7189416	1	0011110111 (1) 0011110101	false
39262	87.36094222	1	1011110111 (1) 1010110111	false
39263	495.10537019	1	1011110111 (1) 1011110101	false
39264	75.70018783	1	0100111011 (1) 0000111011	false
39265	33.68072103	1	0100111011 (1) 0101111011	false
39266	85.5243705	1	0100111011 (1) 0100011011	false
39267	60.38794782	1	0100111011 (1) 0100110011	false
39268	40.45132442	1	0100111011 (1) 0100111111	false
39269	51.12253951	1	0100111011 (1) 0100111001	false
39270	60.70045968	1	0100101111 (1) 0000101111	false
39271	26.2662508	1	0100101111 (1) 0101101111	false
39272	18.3723231	1	0100101111 (1) 0100001111	false
39273	41.23028761	1	0100101111 (1) 0100111111	false
39274	19.73229495	1	0100101111 (1) 0100100111	false
39275	41.23028761	1	0100101111 (1) 0100101101	false
39276	74.63176105	1	0100101011 (1) 0000101011	false
39277	36.79541207	1	0100101011 (1) 0101101011	false
39278	15.16762058	1	0100101011 (1) 0100001011	false
39279	49.98028059	1	0100101011 (1) 0100111011	false
39280	41.68574222	1	0100101011 (1) 0100100011	false
39281	36.23994979	1	0100101011 (1) 0100101111	false
39282	49.98028059	1	0100101011 (1) 0100101001	false
39283	301.10072896	1	1100111011 (1) 1000111011	false
39284	89.83238652	1	1100111011 (1) 1101111011	false
39285	149.74276994	1	1100111011 (1) 1100011011	false
39286	98.21357827	1	1100111011 (1) 1100110011	false
39287	70.96180326	1	1100111011 (1) 1100111111	false
39288	80.32011381	1	1100111011 (1) 1100111001	false
39289	30.63087022	1	1100101111 (1) 1101101111	false
39290	15.19585386	1	1100101111 (1) 1100001111	false
39291	370.03524125	1	1100101111 (1) 1100111111	false
39292	23.17256187	1	1100101111 (1) 1100100111	false
39293	67.95421701	1	1100101111 (1) 1100101101	false
39294	45.89506812	1	1100101011 (1) 1101101011	false
39295	12.53101267	1	1100101011 (1) 1100001011	false
39296	288.6965566	1	1100101011 (1) 1100111011	false
39297	61.09269423	1	1100101011 (1) 1100100011	false
39298	48.10497607	1	1100101011 (1) 1100101111	false
39299	63.20171991	1	1100101011 (1) 1100101001	false
39300	129.33562518	1	1010101011 (1) 1110101011	false
39301	38.55799839	1	1010101011 (1) 1010001011	false
39302	29.53407774	1	1010101011 (1) 1010111011	false
39303	43.24800098	1	1010101011 (1) 1010100011	false
39304	27.26684925	1	1010101011 (1) 1010101111	false
39305	59.64479236	1	1010101011 (1) 1010101001	false
39306	11.03148148	1	1001101011 (1) 1101101011	false
39307	133.28379223	1	1001101011 (1) 1011101011	false
39308	8.65245966	1	1001101011 (1) 1001001011	false
39309	24.41261116	1	1001101011 (1) 1001111011	false
39310	36.41059764	1	1001101011 (1) 1001100011	false
39311	30.90022475	1	1001101011 (1) 1001101111	false
39312	44.50230379	1	1001101011 (1) 1001101001	false
39313	40.14512574	1	1000111011 (1) 1010111011	false
39314	139.17050494	1	1000111011 (1) 1001111011	false
39315	64.20793167	1	1000111011 (1) 1000011011	false
39316	65.19755393	1	1000111011 (1) 1000110011	false
39317	50.80416896	1	1000111011 (1) 1000111111	false
39318	60.29111298	1	1000111011 (1) 1000111001	false
39319	19.96114418	1	1000101111 (1) 1100101111	false
39320	20.90412467	1	1000101111 (1) 1010101111	false
39321	32.09386701	1	1000101111 (1) 1001101111	false
39322	11.54106006	1	1000101111 (1) 1000001111	false
39323	16.86628142	1	1000101111 (1) 1000111111	false
39324	14.25634921	1	1000101111 (1) 1000100111	false
39325	28.92503651	1	1000101111 (1) 1000101101	false
39326	29.2275463	1	1000101011 (1) 1100101011	false
39327	33.42708434	1	1000101011 (1) 1010101011	false
39328	49.19347071	1	1000101011 (1) 1001101011	false
39329	8.75754282	1	1000101011 (1) 1000001011	false
39330	22.71566927	1	1000101011 (1) 1000111011	false
39331	33.6754661	1	1000101011 (1) 1000100011	false
39332	29.54786306	1	1000101011 (1) 1000101111	false
39333	40.45535741	1	1000101011 (1) 1000101001	false
39334	37.97562509	1	0010101011 (1) 0010001011	false
39335	46.66483565	1	0010101011 (1) 0010111011	false
39336	35.13358039	1	0010101011 (1) 0010100011	false
39337	21.47114849	1	0010101011 (1) 0010101111	false
39338	46.66483565	1	0010101011 (1) 0010101001	false
39339	268.81715377	1	0001101011 (1) 0011101011	false
39340	9.00810179	1	0001101011 (1) 0001001011	false
39341	77.13017544	1	0001101011 (1) 0001111011	false
39342	64.41425265	1	0001101011 (1) 0001100011	false
39343	55.10977813	1	0001101011 (1) 0001101111	false
39344	77.13017544	1	0001101011 (1) 0001101001	false
39345	24.96793951	1	0000111011 (1) 0010111011	false
39346	46.03972697	1	0000111011 (1) 0001111011	false
39347	27.08851339	1	0000111011 (1) 0000011011	false
39348	42.25504328	1	0000111011 (1) 0000110011	false
39349	29.06427035	1	0000111011 (1) 0000111111	false
39350	31.2376936	1	0000111011 (1) 0000111001	false
39351	13.53720108	1	0000101111 (1) 0010101111	false
39352	30.58783222	1	0000101111 (1) 0001101111	false
39353	12.29469748	1	0000101111 (1) 0000001111	false
39354	28.7060541	1	0000101111 (1) 0000111111	false
39355	15.19324942	1	0000101111 (1) 0000100111	false
39356	28.7060541	1	0000101111 (1) 0000101101	false
39357	19.85879832	1	0000101011 (1) 0010101011	false
39358	41.90719998	1	0000101011 (1) 0001101011	false
39359	7.678651	1	0000101011 (1) 0000001011	false
39360	33.95299927	1	0000101011 (1) 0000111011	false
39361	29.95648449	1	0000101011 (1) 0000100011	false
39362	26.32462871	1	0000101011 (1) 0000101111	false
39363	33.95299927	1	0000101011 (1) 0000101001	false
39364	32.13030495	1	0110011111 (1) 0010011111	false
39365	185.68431578	1	0110011111 (1) 0100011111	false
39366	85.4116929	1	0110011111 (1) 0110001111	false
39367	166.32455198	1	0110011111 (1) 0110010111	false
39368	115.49351331	1	0101110111 (1) 0001110111	false
39369	122.8448228	1	0101110111 (1) 0101110101	false
39370	326.53522172	1	1101110111 (1) 1001110111	false
39371	330.04268681	1	1101110111 (1) 1101110101	false
39372	55.18736683	1	1110011111 (1) 1010011111	false
39373	388.15420493	1	1110011111 (1) 1100011111	false
39374	63.33630247	1	1110011111 (1) 1110001111	false
39375	377.39872926	1	1110011111 (1) 1110010111	false
39376	48.03672512	1	1111101011 (1) 1101101011	false
39377	896.46945594	1	1111101011 (1) 1110101011	false
39378	706.43178792	1	1111101011 (1) 1111111011	false
39379	156.38393284	1	1111101011 (1) 1111100011	false
39380	110.36398709	1	1111101011 (1) 1111101111	false
39381	145.06688049	1	1111101011 (1) 1111101001	false
39382	259.72892259	1	1001110111 (1) 1011110111	false
39383	617.74375654	1	1001110111 (1) 1001110101	false
39384	58.13341393	1	0111101011 (1) 0011101011	false
39385	37.61728467	1	0111101011 (1) 0101101011	false
39386	148.78440108	1	0111101011 (1) 0110101011	false
39387	69.48628104	1	0111101011 (1) 0111111011	false
39388	60.21511402	1	0111101011 (1) 0111100011	false
39389	51.33706339	1	0111101011 (1) 0111101111	false
39390	69.48628104	1	0111101011 (1) 0111101001	false
39391	166.91801128	1	0001110111 (1) 0011110111	false
39392	331.45208393	1	0001110111 (1) 0001110101	false
39393	418.09955788	1	1010011111 (1) 1010001111	false
39394	288.10135156	1	1010011111 (1) 1010010111	false
39395	99.72154638	1	0010011111 (1) 0010001111	false
39396	202.52243496	1	0010011111 (1) 0010010111	false
39397	120.13056394	1	0100011111 (1) 0000011111	false
39398	317.16926378	1	0100011111 (1) 0101011111	false
39399	150.59952587	1	0100011111 (1) 0100001111	false
39400	210.29430718	1	0100011111 (1) 0100010111	false
39401	412.13181531	1	1100011111 (1) 1000011111	false
39402	531.17621588	1	1100011111 (1) 1101011111	false
39403	87.23930293	1	1100011111 (1) 1100001111	false
39404	435.09004922	1	1100011111 (1) 1100010111	false
39405	30.54385139	1	0110110111 (1) 0010110111	false
39406	136.14333544	1	0110110111 (1) 0100110111	false
39407	314.96378739	1	0110110111 (1) 0110110101	false
39408	442.70243725	1	0101101011 (1) 0001101011	false
39409	91.93455297	1	0101101011 (1) 0101111011	false
39410	80.88184619	1	0101101011 (1) 0101100011	false
39411	73.19159873	1	0101101011 (1) 0101101111	false
39412	91.93455297	1	0101101011 (1) 0101101001	false
39413	51.46198563	1	1110110111 (1) 1010110111	false
39414	315.36998571	1	1110110111 (1) 1100110111	false
39415	499.24333769	1	1110110111 (1) 1110110101	false
39416	1465.40312963	1	1101101011 (1) 1101111011	false
39417	156.22003384	1	1101101011 (1) 1101100011	false
39418	109.88838514	1	1101101011 (1) 1101101111	false
39419	159.72811982	1	1101101011 (1) 1101101001	false
39420	82.03871096	1	1000011111 (1) 1010011111	false
39421	270.49905367	1	1000011111 (1) 1001011111	false
39422	430.12096172	1	1000011111 (1) 1000001111	false
39423	412.36683163	1	1000011111 (1) 1000010111	false
39424	50.65780795	1	0000011111 (1) 0010011111	false
39425	106.57196927	1	0000011111 (1) 0001011111	false
39426	101.99853314	1	0000011111 (1) 0000001111	false
39427	228.16042067	1	0000011111 (1) 0000010111	false
39428	199.12500581	1	0010110111 (1) 0010110101	false
39429	339.81158094	1	1010110111 (1) 1010110101	false
39430	113.27929593	1	0100110111 (1) 0000110111	false
39431	59.62798924	1	0100110111 (1) 0101110111	false
39432	388.61424824	1	0100110111 (1) 0100110101	false
39433	317.07151386	1	1100110111 (1) 1000110111	false
39434	127.88969784	1	1100110111 (1) 1101110111	false
39435	612.17680364	1	1100110111 (1) 1100110101	false
39436	45.41647959	1	0000110111 (1) 0010110111	false
39437	92.5937343	1	0000110111 (1) 0001110111	false
39438	327.76181699	1	0000110111 (1) 0000110101	false
39439	58.0115392	1	1000110111 (1) 1010110111	false
39440	143.11312006	1	1000110111 (1) 1001110111	false
39441	498.53294517	1	1000110111 (1) 1000110101	false
39442	9.74587349	1	0111001111 (1) 0011001111	false
39443	26.21451915	1	0111001111 (1) 0101001111	false
39444	21.1215456	1	0111001111 (1) 0110001111	false
39445	178.03674614	1	0111001111 (1) 0111101111	false
39446	31.34666366	1	0111001111 (1) 0111000111	false
39447	84.73856281	1	1111001111 (1) 1101001111	false
39448	75.35205419	1	1111001111 (1) 1110001111	false
39449	2744.42383596	1	1111001111 (1) 1111101111	false
39450	136.88187755	1	1111001111 (1) 1111000111	false
39451	2469.61964184	1	1011001111 (1) 1111001111	false
39452	130.67257492	1	1011001111 (1) 1010001111	false
39453	322.32125865	1	1011001111 (1) 1011000111	false
39454	63.0376398	1	0011001111 (1) 0010001111	false
39455	142.51551579	1	0011001111 (1) 0011000111	false
39456	56.09764992	1	0101001111 (1) 0001001111	false
39457	551.55900973	1	0101001111 (1) 0101101111	false
39458	61.49161272	1	0101001111 (1) 0101000111	false
39459	1081.16054817	1	1101001111 (1) 1101101111	false
39460	85.99659236	1	1101001111 (1) 1101000111	false
39461	226.41890823	1	1111110011 (1) 1011110011	false
39462	57.36167693	1	1111110011 (1) 1101110011	false
39463	466.92268511	1	1111110011 (1) 1110110011	false
39464	47.36150125	1	1111110011 (1) 1111110111	false
39465	347.19258834	1	1111110011 (1) 1111110001	false
39466	62.30971485	1	1111100111 (1) 1101100111	false
39467	197.46717225	1	1111100111 (1) 1110100111	false
39468	455.71204211	1	1111100111 (1) 1111110111	false
39469	219.68348793	1	1111100111 (1) 1111100101	false
39470	263.84469459	1	1001001111 (1) 1101001111	false
39471	1053.92360772	1	1001001111 (1) 1011001111	false
39472	322.36016029	1	1001001111 (1) 1001000111	false
39473	144.20055114	1	0001001111 (1) 0011001111	false
39474	184.90963969	1	0001001111 (1) 0001000111	false
39475	76.12156597	1	0111110011 (1) 0011110011	false
39476	34.53504432	1	0111110011 (1) 0101110011	false
39477	197.78422133	1	0111110011 (1) 0110110011	false
39478	32.81751478	1	0111110011 (1) 0111110111	false
39479	193.60421671	1	0111110011 (1) 0111110001	false
39480	25.20437899	1	0111100111 (1) 0011100111	false
39481	28.19328619	1	0111100111 (1) 0101100111	false
39482	66.65238735	1	0111100111 (1) 0110100111	false
39483	71.21350831	1	0111100111 (1) 0111110111	false
39484	71.21350831	1	0111100111 (1) 0111100101	false
39485	278.88883133	1	1011110011 (1) 1010110011	false
39486	1113.05823732	1	1011110011 (1) 1011010011	false
39487	31.34898853	1	1011110011 (1) 1011110111	false
39488	698.04314693	1	1011110011 (1) 1011110001	false
39489	445.15392888	1	1011100111 (1) 1111100111	false
39490	154.31349112	1	1011100111 (1) 1010100111	false
39491	119.28369315	1	1011100111 (1) 1011110111	false
39492	242.38792085	1	1011100111 (1) 1011100101	false
39493	145.6045181	1	0011110011 (1) 0010110011	false
39494	167.94160449	1	0011110011 (1) 0011010011	false
39495	25.4303864	1	0011110011 (1) 0011110111	false
39496	262.12490593	1	0011110011 (1) 0011110001	false
39497	79.67121743	1	0011100111 (1) 0010100111	false
39498	130.32809644	1	0011100111 (1) 0011110111	false
39499	130.32809644	1	0011100111 (1) 0011100101	false
39500	99.116419	1	1011101110 (1) 1111101110	false
39501	64.43056686	1	1011101110 (1) 1010101110	false
39502	23.2013083	1	1011101110 (1) 1011001110	false
39503	14.48220372	1	1011101110 (1) 1011111110	false
39504	33.3618788	1	1011101110 (1) 1011100110	false
39505	62.35299117	1	1011101110 (1) 1011101010	false
39506	55.22896683	1	1011101110 (1) 1011101100	false
39507	141.44586282	1	0011101110 (1) 0010101110	false
39508	16.70049137	1	0011101110 (1) 0011001110	false
39509	34.03573632	1	0011101110 (1) 0011111110	false
39510	25.54873719	1	0011101110 (1) 0011100110	false
39511	108.1565047	1	0011101110 (1) 0011101010	false
39512	58.143423	1	0011101110 (1) 0011101100	false
39513	76.15628954	1	0111111101 (1) 0011111101	false
39514	42.66768362	1	0111111101 (1) 0101111101	false
39515	224.13402636	1	0111111101 (1) 0110111101	false
39516	250.50902176	1	1111111101 (1) 1011111101	false
39517	97.17107627	1	1111111101 (1) 1101111101	false
39518	499.21269796	1	1111111101 (1) 1110111101	false
39519	22.69245431	1	0110001111 (1) 0010001111	false
39520	144.32207234	1	0110001111 (1) 0100001111	false
39521	129.00191438	1	0110001111 (1) 0110000111	false
39522	129.93473567	1	0011111101 (1) 0010111101	false
39523	632.49571824	1	0011111101 (1) 0011011101	false
39524	377.39013205	1	0101110011 (1) 0001110011	false
39525	39.44537003	1	0101110011 (1) 0101110111	false
39526	190.24858407	1	0101110011 (1) 0101110001	false
39527	110.51914462	1	0101100111 (1) 0001100111	false
39528	78.33600577	1	0101100111 (1) 0101110111	false
39529	78.33600577	1	0101100111 (1) 0101100101	false
39530	183.88292282	1	1011111101 (1) 1010111101	false
39531	2153.63964768	1	1011111101 (1) 1011011101	false
39532	2038.49769381	1	1101110011 (1) 1001110011	false
39533	67.37522942	1	1101110011 (1) 1101110111	false
39534	683.9069743	1	1101110011 (1) 1101110001	false
39535	390.3294609	1	1101100111 (1) 1101110111	false
39536	190.44333843	1	1101100111 (1) 1101100101	false
39537	445.11484253	1	1110001111 (1) 1100001111	false
39538	260.31142049	1	1110001111 (1) 1110000111	false
39539	95.69414875	1	1011100011 (1) 1111100011	false
39540	68.79962355	1	1011100011 (1) 1010100011	false
39541	32.69747313	1	1011100011 (1) 1011000011	false
39542	72.57808091	1	1011100011 (1) 1011110011	false
39543	24.7059499	1	1011100011 (1) 1011100111	false
39544	110.03950773	1	1011100011 (1) 1011100001	false
39545	1554.1634077	1	1001110011 (1) 1011110011	false
39546	212.36595559	1	1001110011 (1) 1001010011	false
39547	43.82149802	1	1001110011 (1) 1001110111	false
39548	735.76508404	1	1001110011 (1) 1001110001	false
39549	56.51800495	1	1001100111 (1) 1101100111	false
39550	324.70758474	1	1001100111 (1) 1011100111	false
39551	139.51511689	1	1001100111 (1) 1001110111	false
39552	218.05844472	1	1001100111 (1) 1001100101	false
39553	115.58746788	1	0011100011 (1) 0010100011	false
39554	60.76864465	1	0011100011 (1) 0011000011	false
39555	107.6063806	1	0011100011 (1) 0011110011	false
39556	20.2072844	1	0011100011 (1) 0011100111	false
39557	107.6063806	1	0011100011 (1) 0011100001	false
39558	317.35036792	1	0001110011 (1) 0011110011	false
39559	70.26801341	1	0001110011 (1) 0001010011	false
39560	32.38970971	1	0001110011 (1) 0001110111	false
39561	249.17712053	1	0001110011 (1) 0001110001	false
39562	175.99628366	1	0001100111 (1) 0011100111	false
39563	176.45379135	1	0001100111 (1) 0001110111	false
39564	176.45379135	1	0001100111 (1) 0001100101	false
39565	450.9263111	1	1010001111 (1) 1110001111	false
39566	293.51123085	1	1010001111 (1) 1010000111	false
39567	122.33287332	1	0010001111 (1) 0010000111	false
39568	21.85724555	1	0110101110 (1) 0010101110	false
39569	127.69168849	1	0110101110 (1) 0100101110	false
39570	19.44230384	1	0110101110 (1) 0110001110	false
39571	41.93471321	1	0110101110 (1) 0110111110	false
39572	33.09568934	1	0110101110 (1) 0110100110	false
39573	63.10145	1	0110101110 (1) 0110101010	false
39574	61.23018554	1	0110101110 (1) 0110101100	false
39575	27.32127549	1	1111010111 (1) 1011010111	false
39576	22.03146199	1	1111010111 (1) 1101010111	false
39577	42.48755426	1	1111010111 (1) 1110010111	false
39578	71.31001725	1	1111010111 (1) 1111110111	false
39579	18.77505534	1	1111010111 (1) 1111000111	false
39580	16.00111232	1	0111010111 (1) 0011010111	false
39581	19.21799604	1	0111010111 (1) 0101010111	false
39582	44.01441378	1	0111010111 (1) 0110010111	false
39583	64.99249125	1	0111010111 (1) 0111110111	false
39584	30.02278519	1	0111010111 (1) 0111000111	false
39585	661.95647869	1	1110101110 (1) 1100101110	false
39586	18.31233939	1	1110101110 (1) 1110001110	false
39587	649.49523803	1	1110101110 (1) 1110111110	false
39588	57.24561694	1	1110101110 (1) 1110100110	false
39589	222.69309373	1	1110101110 (1) 1110101010	false
39590	147.09566077	1	1110101110 (1) 1110101100	false
39591	79.52383471	1	0011010111 (1) 0010010111	false
39592	159.51913707	1	0011010111 (1) 0011110111	false
39593	83.50782684	1	0011010111 (1) 0011000111	false
39594	298.0076002	1	0101111101 (1) 0001111101	false
39595	127.81478756	1	1011010111 (1) 1010010111	false
39596	235.16288745	1	1011010111 (1) 1011110111	false
39597	434.5635985	1	1011010111 (1) 1011000111	false
39598	1524.30921163	1	1101111101 (1) 1001111101	false
39599	268.15452122	1	0001111101 (1) 0011111101	false
39600	821.63892917	1	0001111101 (1) 0001011101	false
39601	83.3955651	1	0100001111 (1) 0000001111	false
39602	294.4394145	1	0100001111 (1) 0101001111	false
39603	149.89027	1	0100001111 (1) 0100000111	false
39604	838.77173967	1	1001111101 (1) 1011111101	false
39605	2596.39768711	1	1001111101 (1) 1001011101	false
39606	541.99407028	1	1100001111 (1) 1101001111	false
39607	196.35641707	1	1100001111 (1) 1100000111	false
39608	32.37334454	1	0110110011 (1) 0010110011	false
39609	154.98400994	1	0110110011 (1) 0100110011	false
39610	85.19619924	1	0110110011 (1) 0110010011	false
39611	27.52893322	1	0110110011 (1) 0110110111	false
39612	257.83719557	1	0110110011 (1) 0110110001	false
39613	30.42225682	1	0110100111 (1) 0010100111	false
39614	127.78548609	1	0110100111 (1) 0100100111	false
39615	143.00174797	1	0110100111 (1) 0110110111	false
39616	143.00174797	1	0110100111 (1) 0110100101	false
39617	23.58106942	1	0110100011 (1) 0010100011	false
39618	119.26384353	1	0110100011 (1) 0100100011	false
39619	17.18638545	1	0110100011 (1) 0110000011	false
39620	107.93341442	1	0110100011 (1) 0110110011	false
39621	24.73891381	1	0110100011 (1) 0110100111	false
39622	107.93341442	1	0110100011 (1) 0110100001	false
39623	72.64022493	1	1110110011 (1) 1010110011	false
39624	430.27778263	1	1110110011 (1) 1100110011	false
39625	270.01769437	1	1110110011 (1) 1110010011	false
39626	36.85078848	1	1110110011 (1) 1110110111	false
39627	368.15363701	1	1110110011 (1) 1110110001	false
39628	383.49656193	1	1110100111 (1) 1100100111	false
39629	632.58881727	1	1110100111 (1) 1110110111	false
39630	402.22479915	1	1110100111 (1) 1110100101	false
39631	72.84035099	1	1000001111 (1) 1100001111	false
39632	69.44799853	1	1000001111 (1) 1010001111	false
39633	258.01043351	1	1000001111 (1) 1001001111	false
39634	305.26683914	1	1000001111 (1) 1000000111	false
39635	39.50943133	1	0000001111 (1) 0010001111	false
39636	79.54847079	1	0000001111 (1) 0001001111	false
39637	171.84235059	1	0000001111 (1) 0000000111	false
39638	76.44558689	1	0100101110 (1) 0000101110	false
39639	35.48948845	1	0100101110 (1) 0101101110	false
39640	19.64859442	1	0100101110 (1) 0100001110	false
39641	35.97037389	1	0100101110 (1) 0100111110	false
39642	30.88556996	1	0100101110 (1) 0100100110	false
39643	53.11850278	1	0100101110 (1) 0100101010	false
39644	51.13357211	1	0100101110 (1) 0100101100	false
39645	375.0760227	1	1110100011 (1) 1100100011	false
39646	18.51713045	1	1110100011 (1) 1110000011	false
39647	503.06167356	1	1110100011 (1) 1110110011	false
39648	36.94427138	1	1110100011 (1) 1110100111	false
39649	222.30238329	1	1110100011 (1) 1110100001	false
39650	306.08394985	1	1010110011 (1) 1010010011	false
39651	19.44168249	1	1010110011 (1) 1010110111	false
39652	307.64089928	1	1010110011 (1) 1010110001	false
39653	479.4944089	1	1010100111 (1) 1110100111	false
39654	76.03904273	1	1010100111 (1) 1010110111	false
39655	216.05263152	1	1010100111 (1) 1010100101	false
39656	79.14146572	1	0101010111 (1) 0001010111	false
39657	71.91305176	1	0101010111 (1) 0101110111	false
39658	49.45983517	1	0101010111 (1) 0101000111	false
39659	137.50240114	1	0010110011 (1) 0010010011	false
39660	18.46435552	1	0010110011 (1) 0010110111	false
39661	187.11263309	1	0010110011 (1) 0010110001	false
39662	112.00798238	1	0010100111 (1) 0010110111	false
39663	112.00798238	1	0010100111 (1) 0010100101	false
39664	200.24443179	1	1101010111 (1) 1001010111	false
39665	100.17295372	1	1101010111 (1) 1101110111	false
39666	29.13501606	1	1101010111 (1) 1101000111	false
39667	39.8993972	1	1100101110 (1) 1101101110	false
39668	14.74934479	1	1100101110 (1) 1100001110	false
39669	375.10703295	1	1100101110 (1) 1100111110	false
39670	36.67990942	1	1100101110 (1) 1100100110	false
39671	112.44253802	1	1100101110 (1) 1100101010	false
39672	78.68512861	1	1100101110 (1) 1100101100	false
39673	161.75865394	1	1010101110 (1) 1110101110	false
39674	15.56618931	1	1010101110 (1) 1010001110	false
39675	10.78031644	1	1010101110 (1) 1010111110	false
39676	27.86244379	1	1010101110 (1) 1010100110	false
39677	57.2807008	1	1010101110 (1) 1010101010	false
39678	46.36158329	1	1010101110 (1) 1010101100	false
39679	10.60151515	1	1001101110 (1) 1101101110	false
39680	122.17433468	1	1001101110 (1) 1011101110	false
39681	17.05713657	1	1001101110 (1) 1001001110	false
39682	15.87880592	1	1001101110 (1) 1001111110	false
39683	27.45822962	1	1001101110 (1) 1001100110	false
39684	44.56017542	1	1001101110 (1) 1001101010	false
39685	44.65213172	1	1001101110 (1) 1001101100	false
39686	26.60687229	1	1000101110 (1) 1100101110	false
39687	30.17932071	1	1000101110 (1) 1010101110	false
39688	47.38232908	1	1000101110 (1) 1001101110	false
39689	13.61928945	1	1000101110 (1) 1000001110	false
39690	15.83888167	1	1000101110 (1) 1000111110	false
39691	25.62347868	1	1000101110 (1) 1000100110	false
39692	40.11353027	1	1000101110 (1) 1000101010	false
39693	40.63629784	1	1000101110 (1) 1000101100	false
39694	12.05442454	1	0010101110 (1) 0010001110	false
39695	19.24541958	1	0010101110 (1) 0010111110	false
39696	16.40018139	1	0010101110 (1) 0010100110	false
39697	103.63662876	1	0010101110 (1) 0010101010	false
39698	36.14196264	1	0010101110 (1) 0010101100	false
39699	310.15678347	1	0001101110 (1) 0011101110	false
39700	18.41964967	1	0001101110 (1) 0001001110	false
39701	52.76620442	1	0001101110 (1) 0001111110	false
39702	34.38767117	1	0001101110 (1) 0001100110	false
39703	110.20333272	1	0001101110 (1) 0001101010	false
39704	83.56731485	1	0001101110 (1) 0001101100	false
39705	17.17550855	1	0000101110 (1) 0010101110	false
39706	39.86494832	1	0000101110 (1) 0001101110	false
39707	12.35654889	1	0000101110 (1) 0000001110	false
39708	24.57947364	1	0000101110 (1) 0000111110	false
39709	22.65765114	1	0000101110 (1) 0000100110	false
39710	37.18550497	1	0000101110 (1) 0000101010	false
39711	34.62595137	1	0000101110 (1) 0000101100	false
39712	186.50501302	1	0001010111 (1) 0011010111	false
39713	240.17064244	1	0001010111 (1) 0001110111	false
39714	107.75983268	1	0001010111 (1) 0001000111	false
39715	377.00741305	1	1001010111 (1) 1011010111	false
39716	335.52705565	1	1001010111 (1) 1001110111	false
39717	455.75481562	1	1001010111 (1) 1001000111	false
39718	50.40585223	1	0110111101 (1) 0010111101	false
39719	296.32939664	1	0110111101 (1) 0100111101	false
39720	687.28365173	1	0110111101 (1) 0110011101	false
39721	98.01107054	1	1110111101 (1) 1010111101	false
39722	771.62595624	1	1110111101 (1) 1100111101	false
39723	1389.31126135	1	1110111101 (1) 1110011101	false
39724	59.87397193	1	0111101110 (1) 0011101110	false
39725	42.07053347	1	0111101110 (1) 0101101110	false
39726	161.35327597	1	0111101110 (1) 0110101110	false
39727	45.73269209	1	0111101110 (1) 0111111110	false
39728	47.83085551	1	0111101110 (1) 0111100110	false
39729	86.01317021	1	0111101110 (1) 0111101010	false
39730	72.5222447	1	0111101110 (1) 0111101100	false
39731	82.05300032	1	1111101110 (1) 1101101110	false
39732	1626.03977362	1	1111101110 (1) 1110101110	false
39733	1031.953768	1	1111101110 (1) 1111111110	false
39734	150.64228916	1	1111101110 (1) 1111100110	false
39735	418.51115934	1	1111101110 (1) 1111101010	false
39736	228.90091116	1	1111101110 (1) 1111101100	false
39737	91.31152442	1	0100110011 (1) 0000110011	false
39738	38.97689353	1	0100110011 (1) 0101110011	false
39739	81.84833901	1	0100110011 (1) 0100010011	false
39740	27.45708851	1	0100110011 (1) 0100110111	false
39741	221.80422071	1	0100110011 (1) 0100110001	false
39742	113.07922269	1	0100100111 (1) 0000100111	false
39743	67.69483497	1	0100100111 (1) 0101100111	false
39744	172.9692429	1	0100100111 (1) 0100110111	false
39745	172.9692429	1	0100100111 (1) 0100100101	false
39746	72.80205493	1	0100100011 (1) 0000100011	false
39747	33.8284953	1	0100100011 (1) 0101100011	false
39748	16.40611506	1	0100100011 (1) 0100000011	false
39749	90.02610842	1	0100100011 (1) 0100110011	false
39750	23.86070362	1	0100100011 (1) 0100100111	false
39751	90.02610842	1	0100100011 (1) 0100100001	false
39752	502.27014659	1	0010111101 (1) 0010011101	false
39753	312.82314128	1	1100110011 (1) 1000110011	false
39754	102.32546592	1	1100110011 (1) 1101110011	false
39755	195.53661032	1	1100110011 (1) 1100010011	false
39756	37.72037527	1	1100110011 (1) 1100110111	false
39757	315.44520056	1	1100110011 (1) 1100110001	false
39758	119.3663202	1	1100100111 (1) 1101100111	false
39759	593.31114346	1	1100100111 (1) 1100110111	false
39760	350.21108577	1	1100100111 (1) 1100100101	false
39761	1033.12960792	1	1010111101 (1) 1010011101	false
39762	50.13410299	1	1100100011 (1) 1101100011	false
39763	14.68380496	1	1100100011 (1) 1100000011	false
39764	339.35943246	1	1100100011 (1) 1100110011	false
39765	27.37677819	1	1100100011 (1) 1100100111	false
39766	138.28678364	1	1100100011 (1) 1100100001	false
39767	151.28869736	1	1010100011 (1) 1110100011	false
39768	39.17707667	1	1010100011 (1) 1010000011	false
39769	54.68914984	1	1010100011 (1) 1010110011	false
39770	19.39168846	1	1010100011 (1) 1010100111	false
39771	98.23616697	1	1010100011 (1) 1010100001	false
39772	10.94444444	1	1001100011 (1) 1101100011	false
39773	134.7800293	1	1001100011 (1) 1011100011	false
39774	9.29959959	1	1001100011 (1) 1001000011	false
39775	58.55625422	1	1001100011 (1) 1001110011	false
39776	21.21299962	1	1001100011 (1) 1001100111	false
39777	78.65897752	1	1001100011 (1) 1001100001	false
39778	51.52871562	1	1000110011 (1) 1010110011	false
39779	156.1423327	1	1000110011 (1) 1001110011	false
39780	82.19839842	1	1000110011 (1) 1000010011	false
39781	25.79317156	1	1000110011 (1) 1000110111	false
39782	204.11893949	1	1000110011 (1) 1000110001	false
39783	89.05380183	1	1000100111 (1) 1100100111	false
39784	74.3072964	1	1000100111 (1) 1010100111	false
39785	113.47456056	1	1000100111 (1) 1001100111	false
39786	125.39011843	1	1000100111 (1) 1000110111	false
39787	202.60766328	1	1000100111 (1) 1000100101	false
39788	37.6721853	1	1000100011 (1) 1100100011	false
39789	32.73515476	1	1000100011 (1) 1010100011	false
39790	51.04170707	1	1000100011 (1) 1001100011	false
39791	8.86222826	1	1000100011 (1) 1000000011	false
39792	45.76086258	1	1000100011 (1) 1000110011	false
39793	19.05758272	1	1000100011 (1) 1000100111	false
39794	68.54574541	1	1000100011 (1) 1000100001	false
39795	49.89584745	1	0010100011 (1) 0010000011	false
39796	73.17298644	1	0010100011 (1) 0010110011	false
39797	13.56588018	1	0010100011 (1) 0010100111	false
39798	73.17298644	1	0010100011 (1) 0010100001	false
39799	267.01430714	1	0001100011 (1) 0011100011	false
39800	12.61996551	1	0001100011 (1) 0001000011	false
39801	122.68609803	1	0001100011 (1) 0001110011	false
39802	27.37538216	1	0001100011 (1) 0001100111	false
39803	122.68609803	1	0001100011 (1) 0001100001	false
39804	31.87230765	1	0000110011 (1) 0010110011	false
39805	56.71141488	1	0000110011 (1) 0001110011	false
39806	35.80921765	1	0000110011 (1) 0000010011	false
39807	20.84603539	1	0000110011 (1) 0000110111	false
39808	111.59452726	1	0000110011 (1) 0000110001	false
39809	48.22432909	1	0000100111 (1) 0010100111	false
39810	97.67982411	1	0000100111 (1) 0001100111	false
39811	171.98718487	1	0000100111 (1) 0000110111	false
39812	171.98718487	1	0000100111 (1) 0000100101	false
39813	20.50558282	1	0000100011 (1) 0010100011	false
39814	41.01360596	1	0000100011 (1) 0001100011	false
39815	9.09081533	1	0000100011 (1) 0000000011	false
39816	51.26693513	1	0000100011 (1) 0000110011	false
39817	17.61466506	1	0000100011 (1) 0000100111	false
39818	51.26693513	1	0000100011 (1) 0000100001	false
39819	29.37826567	1	0110010111 (1) 0010010111	false
39820	121.87093442	1	0110010111 (1) 0100010111	false
39821	178.27288177	1	0110010111 (1) 0110110111	false
39822	63.63016936	1	0110010111 (1) 0110000111	false
39823	45.93640913	1	1110010111 (1) 1010010111	false
39824	208.94551686	1	1110010111 (1) 1100010111	false
39825	180.65270996	1	1110010111 (1) 1110110111	false
39826	44.13817267	1	1110010111 (1) 1110000111	false
39827	713.05974569	1	1100111101 (1) 1000111101	false
39828	135.85562825	1	1100111101 (1) 1101111101	false
39829	1923.09770103	1	1100111101 (1) 1100011101	false
39830	61.20273836	1	0111100011 (1) 0011100011	false
39831	36.0357064	1	0111100011 (1) 0101100011	false
39832	159.33646614	1	0111100011 (1) 0110100011	false
39833	118.61787974	1	0111100011 (1) 0111110011	false
39834	35.74730165	1	0111100011 (1) 0111100111	false
39835	118.61787974	1	0111100011 (1) 0111100001	false
39836	51.64588364	1	1111100011 (1) 1101100011	false
39837	807.87288397	1	1111100011 (1) 1110100011	false
39838	763.5920016	1	1111100011 (1) 1111110011	false
39839	60.35544113	1	1111100011 (1) 1111100111	false
39840	325.29814396	1	1111100011 (1) 1111100001	false
39841	176.40611059	1	1010010111 (1) 1010110111	false
39842	382.59598501	1	1010010111 (1) 1010000111	false
39843	180.40748404	1	0100111101 (1) 0000111101	false
39844	46.06155498	1	0100111101 (1) 0101111101	false
39845	1051.43162036	1	0100111101 (1) 0100011101	false
39846	141.31901947	1	0010010111 (1) 0010110111	false
39847	73.44529251	1	0010010111 (1) 0010000111	false
39848	548.636008	1	0101101110 (1) 0001101110	false
39849	59.74082143	1	0101101110 (1) 0101111110	false
39850	62.14672272	1	0101101110 (1) 0101100110	false
39851	141.66954751	1	0101101110 (1) 0101101010	false
39852	102.69526027	1	0101101110 (1) 0101101100	false
39853	935.79355247	1	1101101110 (1) 1101111110	false
39854	101.81481155	1	1101101110 (1) 1101100110	false
39855	203.00453058	1	1101101110 (1) 1101101010	false
39856	132.73436532	1	1101101110 (1) 1101101100	false
39857	62.87833525	1	0000111101 (1) 0010111101	false
39858	127.6697899	1	0000111101 (1) 0001111101	false
39859	561.12045947	1	0000111101 (1) 0000011101	false
39860	101.45686476	1	1000111101 (1) 1010111101	false
39861	307.61539615	1	1000111101 (1) 1001111101	false
39862	1286.74206304	1	1000111101 (1) 1000011101	false
39863	19.00011241	1	1111011101 (1) 1011011101	false
39864	22.77953083	1	1111011101 (1) 1101011101	false
39865	30.30519948	1	1111011101 (1) 1110011101	false
39866	11.7503848	1	1111011101 (1) 1111111101	false
39867	38.21018758	1	1111011101 (1) 1111001101	false
39868	62.60800197	1	1111011101 (1) 1111011111	false
39869	24.62009076	1	1111011011 (1) 1011011011	false
39870	24.26492998	1	1111011011 (1) 1101011011	false
39871	25.80655009	1	1111011011 (1) 1110011011	false
39872	115.99917553	1	1111011011 (1) 1111111011	false
39873	43.51084475	1	1111011011 (1) 1111001011	false
39874	48.98331293	1	1111011011 (1) 1111010011	false
39875	35.89888654	1	1111011011 (1) 1111011111	false
39876	11.55666995	1	0111011101 (1) 0011011101	false
39877	21.66219006	1	0111011101 (1) 0101011101	false
39878	28.63977672	1	0111011101 (1) 0110011101	false
39879	11.7503848	1	0111011101 (1) 0111111101	false
39880	66.34090152	1	0111011101 (1) 0111001101	false
39881	66.34090152	1	0111011101 (1) 0111011111	false
39882	15.99843356	1	0111011011 (1) 0011011011	false
39883	25.55232978	1	0111011011 (1) 0101011011	false
39884	25.13745058	1	0111011011 (1) 0110011011	false
39885	105.18994402	1	0111011011 (1) 0111111011	false
39886	86.06583554	1	0111011011 (1) 0111001011	false
39887	48.97735493	1	0111011011 (1) 0111010011	false
39888	38.03447532	1	0111011011 (1) 0111011111	false
39889	110.38224656	1	0100010111 (1) 0000010111	false
39890	89.83989043	1	0100010111 (1) 0101010111	false
39891	214.88874595	1	0100010111 (1) 0100110111	false
39892	80.50869993	1	0100010111 (1) 0100000111	false
39893	279.80419643	1	1100010111 (1) 1000010111	false
39894	181.28776452	1	1100010111 (1) 1101010111	false
39895	225.69026014	1	1100010111 (1) 1100110111	false
39896	48.50385548	1	1100010111 (1) 1100000111	false
39897	86.1065506	1	1000010111 (1) 1010010111	false
39898	181.39604005	1	1000010111 (1) 1001010111	false
39899	357.39331062	1	1000010111 (1) 1000110111	false
39900	406.81226924	1	1000010111 (1) 1000000111	false
39901	221.83737852	1	1011011101 (1) 1010011101	false
39902	2449.96179058	1	1011011101 (1) 1011001101	false
39903	713.77570422	1	1011011101 (1) 1011011111	false
39904	60.45234536	1	1011011011 (1) 1001011011	false
39905	159.21040438	1	1011011011 (1) 1010011011	false
39906	1323.43142837	1	1011011011 (1) 1011001011	false
39907	161.0753151	1	1011011011 (1) 1011010011	false
39908	83.43014849	1	1011011011 (1) 1011011111	false
39909	127.18234021	1	0011011101 (1) 0010011101	false
39910	329.96683457	1	0011011101 (1) 0011001101	false
39911	329.96683457	1	0011011101 (1) 0011011111	false
39912	42.97983281	1	0011011011 (1) 0001011011	false
39913	95.08563135	1	0011011011 (1) 0010011011	false
39914	74.1404866	1	0011011011 (1) 0011001011	false
39915	68.84687031	1	0011011011 (1) 0011010011	false
39916	39.34528085	1	0011011011 (1) 0011011111	false
39917	63.38358179	1	0111111110 (1) 0011111110	false
39918	41.79475685	1	0111111110 (1) 0101111110	false
39919	180.95077273	1	0111111110 (1) 0110111110	false
39920	101.28441074	1	0111111110 (1) 0111110110	false
39921	47.37638965	1	0111111110 (1) 0111111100	false
39922	49.63386142	1	0000010111 (1) 0010010111	false
39923	109.29171756	1	0000010111 (1) 0001010111	false
39924	277.75261291	1	0000010111 (1) 0000110111	false
39925	92.21150343	1	0000010111 (1) 0000000111	false
39926	409.95399227	1	0101100011 (1) 0001100011	false
39927	138.12939889	1	0101100011 (1) 0101110011	false
39928	43.91930377	1	0101100011 (1) 0101100111	false
39929	138.12939889	1	0101100011 (1) 0101100001	false
39930	271.59770805	1	1111111110 (1) 1011111110	false
39931	86.27752948	1	1111111110 (1) 1101111110	false
39932	715.36635116	1	1111111110 (1) 1110111110	false
39933	172.03158771	1	1111111110 (1) 1111110110	false
39934	100.87537962	1	1111111110 (1) 1111111100	false
39935	1764.56010478	1	1101100011 (1) 1101110011	false
39936	65.51164131	1	1101100011 (1) 1101100111	false
39937	424.23845243	1	1101100011 (1) 1101100001	false
39938	131.13015235	1	0011111110 (1) 0010111110	false
39939	126.75871977	1	0011111110 (1) 0011011110	false
39940	129.099072	1	0011111110 (1) 0011110110	false
39941	60.28200562	1	0011111110 (1) 0011111100	false
39942	236.80530943	1	1011111110 (1) 1010111110	false
39943	634.44408155	1	1011111110 (1) 1011011110	false
39944	131.24664058	1	1011111110 (1) 1011110110	false
39945	157.22841266	1	1011111110 (1) 1011111100	false
39946	68.25672604	1	0101011101 (1) 0001011101	false
39947	22.89169393	1	0101011101 (1) 0101111101	false
39948	240.20452182	1	0101011101 (1) 0101001101	false
39949	240.20452182	1	0101011101 (1) 0101011111	false
39950	26.42633026	1	0101011011 (1) 0001011011	false
39951	315.05859294	1	0101011011 (1) 0101111011	false
39952	157.77905561	1	0101011011 (1) 0101001011	false
39953	75.84490389	1	0101011011 (1) 0101010011	false
39954	67.74346681	1	0101011011 (1) 0101011111	false
39955	270.95775858	1	1101011101 (1) 1001011101	false
39956	22.93249373	1	1101011101 (1) 1101111101	false
39957	113.87194166	1	1101011101 (1) 1101001101	false
39958	351.97697585	1	1101011101 (1) 1101011111	false
39959	70.16232367	1	1101011011 (1) 1001011011	false
39960	558.36714496	1	1101011011 (1) 1101111011	false
39961	45.24744548	1	1101011011 (1) 1101001011	false
39962	98.0320795	1	1101011011 (1) 1101010011	false
39963	94.83438027	1	1101011011 (1) 1101011111	false
39964	266.67671784	1	0001011101 (1) 0011011101	false
39965	393.3554068	1	0001011101 (1) 0001001101	false
39966	393.3554068	1	0001011101 (1) 0001011111	false
39967	61.97735138	1	0001011011 (1) 0001001011	false
39968	70.76453068	1	0001011011 (1) 0001010011	false
39969	119.77003549	1	0001011011 (1) 0001011111	false
39970	1095.29566265	1	1001011101 (1) 1011011101	false
39971	1831.28232294	1	1001011101 (1) 1001001101	false
39972	754.59984857	1	1001011101 (1) 1001011111	false
39973	469.7440159	1	1001011011 (1) 1001001011	false
39974	115.0639561	1	1001011011 (1) 1001010011	false
39975	270.99535471	1	1001011011 (1) 1001011111	false
39976	394.56097368	1	0101111110 (1) 0001111110	false
39977	148.43569482	1	0101111110 (1) 0101110110	false
39978	54.03493627	1	0101111110 (1) 0101111100	false
39979	1561.16936257	1	1101111110 (1) 1001111110	false
39980	232.52189326	1	1101111110 (1) 1101110110	false
39981	178.7929506	1	1101111110 (1) 1101111100	false
39982	261.41909222	1	0001111110 (1) 0011111110	false
39983	175.96306313	1	0001111110 (1) 0001011110	false
39984	124.70027791	1	0001111110 (1) 0001110110	false
39985	83.44179061	1	0001111110 (1) 0001111100	false
39986	686.79456895	1	1001111110 (1) 1011111110	false
39987	975.36638798	1	1001111110 (1) 1001011110	false
39988	149.45371528	1	1001111110 (1) 1001110110	false
39989	247.36193773	1	1001111110 (1) 1001111100	false
39990	41.1589601	1	0111101101 (1) 0011101101	false
39991	29.30934799	1	0111101101 (1) 0101101101	false
39992	113.50104258	1	0111101101 (1) 0110101101	false
39993	36.9896095	1	0111101101 (1) 0111111101	false
39994	25.83518189	1	0111101101 (1) 0111100101	false
39995	47.19771081	1	0110011101 (1) 0010011101	false
39996	309.30749031	1	0110011101 (1) 0100011101	false
39997	260.17324768	1	0110011101 (1) 0110001101	false
39998	260.17324768	1	0110011101 (1) 0110011111	false
39999	35.52314744	1	0110011011 (1) 0010011011	false
40000	183.259519	1	0110011011 (1) 0100011011	false
40001	67.0569381	1	0110011011 (1) 0110001011	false
40002	67.41365513	1	0110011011 (1) 0110010011	false
40003	64.47869995	1	0110011011 (1) 0110011111	false
40004	62.57759653	1	1111101101 (1) 1101101101	false
40005	820.0559659	1	1111101101 (1) 1110101101	false
40006	493.12973968	1	1111101101 (1) 1111111101	false
40007	84.79498803	1	1111101101 (1) 1111100101	false
40008	93.24665541	1	1110011101 (1) 1010011101	false
40009	574.63094123	1	1110011101 (1) 1100011101	false
40010	215.16440565	1	1110011101 (1) 1110001101	false
40011	535.11962944	1	1110011101 (1) 1110011111	false
40012	64.89334835	1	1110011011 (1) 1010011011	false
40013	287.47054433	1	1110011011 (1) 1100011011	false
40014	38.56769209	1	1110011011 (1) 1110001011	false
40015	83.07073294	1	1110011011 (1) 1110010011	false
40016	76.61327572	1	1110011011 (1) 1110011111	false
40017	83.60921155	1	1011101101 (1) 1111101101	false
40018	53.2307189	1	1011101101 (1) 1010101101	false
40019	94.19047384	1	1011101101 (1) 1011001101	false
40020	18.70903524	1	1011101101 (1) 1011111101	false
40021	21.20422838	1	1011101101 (1) 1011100101	false
40022	114.53216576	1	0011101101 (1) 0010101101	false
40023	71.96275785	1	0011101101 (1) 0011001101	false
40024	43.55148999	1	0011101101 (1) 0011111101	false
40025	23.3803713	1	0011101101 (1) 0011100101	false
40026	1100.41438775	1	1010011101 (1) 1010001101	false
40027	370.40922262	1	1010011101 (1) 1010011111	false
40028	390.89374732	1	1010011011 (1) 1000011011	false
40029	311.56035531	1	1010011011 (1) 1010001011	false
40030	127.46306009	1	1010011011 (1) 1010010011	false
40031	57.61611223	1	1010011011 (1) 1010011111	false
40032	26.81346709	1	0110111110 (1) 0010111110	false
40033	162.65113573	1	0110111110 (1) 0100111110	false
40034	171.31158188	1	0110111110 (1) 0110011110	false
40035	88.05862867	1	0110111110 (1) 0110110110	false
40036	76.71518057	1	0110111110 (1) 0110111100	false
40037	105.70289834	1	1110111110 (1) 1010111110	false
40038	672.91330783	1	1110111110 (1) 1100111110	false
40039	539.88095855	1	1110111110 (1) 1110011110	false
40040	124.50405845	1	1110111110 (1) 1110110110	false
40041	118.18486815	1	1110111110 (1) 1110111100	false
40042	291.27298894	1	0010011101 (1) 0010001101	false
40043	291.27298894	1	0010011101 (1) 0010011111	false
40044	199.47330531	1	0010011011 (1) 0000011011	false
40045	78.14485682	1	0010011011 (1) 0010001011	false
40046	82.90080029	1	0010011011 (1) 0010010011	false
40047	38.49720167	1	0010011011 (1) 0010011111	false
40048	73.75945808	1	0010111110 (1) 0010011110	false
40049	128.11112233	1	0010111110 (1) 0010110110	false
40050	37.27746892	1	0010111110 (1) 0010111100	false
40051	236.80163446	1	1010111110 (1) 1010011110	false
40052	147.92451569	1	1010111110 (1) 1010110110	false
40053	76.6340254	1	1010111110 (1) 1010111100	false
40054	20.36824061	1	0111000111 (1) 0011000111	false
40055	24.05988944	1	0111000111 (1) 0101000111	false
40056	50.69261713	1	0111000111 (1) 0110000111	false
40057	116.58082737	1	0111000111 (1) 0111100111	false
40058	48.20908967	1	1111000111 (1) 1101000111	false
40059	150.51149027	1	1111000111 (1) 1110000111	false
40060	490.13045006	1	1111000111 (1) 1111100111	false
40061	331.31120258	1	0101101101 (1) 0001101101	false
40062	46.15682271	1	0101101101 (1) 0101111101	false
40063	40.79802987	1	0101101101 (1) 0101100101	false
40064	734.31944569	1	1100011101 (1) 1000011101	false
40065	724.89827486	1	1100011101 (1) 1101011101	false
40066	292.81689021	1	1100011101 (1) 1100001101	false
40067	821.58999341	1	1100011101 (1) 1100011111	false
40068	102.83771911	1	1100011011 (1) 1000011011	false
40069	482.72194071	1	1100011011 (1) 1101011011	false
40070	50.11008177	1	1100011011 (1) 1100001011	false
40071	107.85665183	1	1100011011 (1) 1100010011	false
40072	113.99289734	1	1100011011 (1) 1100011111	false
40073	178.95340035	1	0100011101 (1) 0000011101	false
40074	461.70007476	1	0100011101 (1) 0101011101	false
40075	446.8314364	1	0100011101 (1) 0100001101	false
40076	446.8314364	1	0100011101 (1) 0100011111	false
40077	49.32677882	1	0100011011 (1) 0000011011	false
40078	302.42433344	1	0100011011 (1) 0101011011	false
40079	119.43545507	1	0100011011 (1) 0100001011	false
40080	86.23905061	1	0100011011 (1) 0100010011	false
40081	88.14205011	1	0100011011 (1) 0100011111	false
40082	643.57803292	1	1101101101 (1) 1101111101	false
40083	60.79081754	1	1101101101 (1) 1101100101	false
40084	521.11650481	1	1011000111 (1) 1111000111	false
40085	215.98339821	1	1011000111 (1) 1010000111	false
40086	738.58507702	1	1011000111 (1) 1011100111	false
40087	91.14802547	1	0011000111 (1) 0010000111	false
40088	316.44497073	1	0011000111 (1) 0011100111	false
40089	100.50725441	1	1111110110 (1) 1011110110	false
40090	67.33348347	1	1111110110 (1) 1101110110	false
40091	188.68444759	1	1111110110 (1) 1110110110	false
40092	141.39611068	1	1111110110 (1) 1111110010	false
40093	300.42159746	1	1111110110 (1) 1111110100	false
40094	47.90369958	1	0111110110 (1) 0011110110	false
40095	39.02769385	1	0111110110 (1) 0101110110	false
40096	135.53925066	1	0111110110 (1) 0110110110	false
40097	83.33100961	1	0111110110 (1) 0111110010	false
40098	191.0935431	1	0111110110 (1) 0111110100	false
40099	118.31366983	1	0011101001 (1) 0010101001	false
40100	126.02336389	1	0011101001 (1) 0011001001	false
40101	65.12783689	1	0011101001 (1) 0011111001	false
40102	82.02310042	1	0011101001 (1) 0011100001	false
40103	39.92360158	1	0011101001 (1) 0011101101	false
40104	222.05273037	1	0001101101 (1) 0011101101	false
40105	102.59100058	1	0001101101 (1) 0001001101	false
40106	62.10167898	1	0001101101 (1) 0001111101	false
40107	29.2687041	1	0001101101 (1) 0001100101	false
40108	78.26196637	1	1011101001 (1) 1111101001	false
40109	76.79334225	1	1011101001 (1) 1010101001	false
40110	168.5130059	1	1011101001 (1) 1011001001	false
40111	34.21394806	1	1011101001 (1) 1011111001	false
40112	70.19205655	1	1011101001 (1) 1011100001	false
40113	38.81096131	1	1011101001 (1) 1011101101	false
40114	8.67222222	1	1001101101 (1) 1101101101	false
40115	93.84286206	1	1001101101 (1) 1011101101	false
40116	73.29950545	1	1001101101 (1) 1001001101	false
40117	19.99258109	1	1001101101 (1) 1001111101	false
40118	16.6080867	1	1001101101 (1) 1001100101	false
40119	70.55298956	1	0000011101 (1) 0010011101	false
40120	152.03201658	1	0000011101 (1) 0001011101	false
40121	304.17655496	1	0000011101 (1) 0000001101	false
40122	304.17655496	1	0000011101 (1) 0000011111	false
40123	66.79251133	1	0000011011 (1) 0001011011	false
40124	70.53700356	1	0000011011 (1) 0000001011	false
40125	93.68923147	1	0000011011 (1) 0000010011	false
40126	151.96357057	1	0000011011 (1) 0000011111	false
40127	139.78022707	1	1000011101 (1) 1010011101	false
40128	451.42391269	1	1000011101 (1) 1001011101	false
40129	1141.54205764	1	1000011101 (1) 1000001101	false
40130	530.91817163	1	1000011101 (1) 1000011111	false
40131	191.49555434	1	1000011011 (1) 1001011011	false
40132	328.33954849	1	1000011011 (1) 1000001011	false
40133	140.21449656	1	1000011011 (1) 1000010011	false
40134	235.85000176	1	1000011011 (1) 1000011111	false
40135	163.32604328	1	0011110110 (1) 0010110110	false
40136	430.1914892	1	0011110110 (1) 0011110010	false
40137	534.92811261	1	0011110110 (1) 0011110100	false
40138	484.65795527	1	1100111110 (1) 1000111110	false
40139	80.15051054	1	1100111110 (1) 1101111110	false
40140	409.10580033	1	1100111110 (1) 1100011110	false
40141	113.59696854	1	1100111110 (1) 1100110110	false
40142	117.48574249	1	1100111110 (1) 1100111100	false
40143	161.6342881	1	1011110110 (1) 1010110110	false
40144	432.10205869	1	1011110110 (1) 1011110010	false
40145	712.07934762	1	1011110110 (1) 1011110100	false
40146	94.42136834	1	0100111110 (1) 0000111110	false
40147	36.14231131	1	0100111110 (1) 0101111110	false
40148	173.47135959	1	0100111110 (1) 0100011110	false
40149	84.24685141	1	0100111110 (1) 0100110110	false
40150	68.78496881	1	0100111110 (1) 0100111100	false
40151	23.93731221	1	0000111110 (1) 0010111110	false
40152	52.70470933	1	0000111110 (1) 0001111110	false
40153	81.50864885	1	0000111110 (1) 0000011110	false
40154	63.82641461	1	0000111110 (1) 0000110110	false
40155	43.97439679	1	0000111110 (1) 0000111100	false
40156	39.27465295	1	1000111110 (1) 1010111110	false
40157	119.89906026	1	1000111110 (1) 1001111110	false
40158	270.84221386	1	1000111110 (1) 1000011110	false
40159	72.50014447	1	1000111110 (1) 1000110110	false
40160	95.23129411	1	1000111110 (1) 1000111100	false
40161	101.87142392	1	0101000111 (1) 0001000111	false
40162	159.4604299	1	0101000111 (1) 0101100111	false
40163	361.03717736	1	1101000111 (1) 1101100111	false
40164	85.09737576	1	1001000111 (1) 1101000111	false
40165	563.55744357	1	1001000111 (1) 1011000111	false
40166	734.6716208	1	1001000111 (1) 1001100111	false
40167	223.40830361	1	0001000111 (1) 0011000111	false
40168	456.45723328	1	0001000111 (1) 0001100111	false
40169	200.01423631	1	0101110110 (1) 0001110110	false
40170	90.93949667	1	0101110110 (1) 0101110010	false
40171	187.04038743	1	0101110110 (1) 0101110100	false
40172	533.83721636	1	1101110110 (1) 1001110110	false
40173	184.99837613	1	1101110110 (1) 1101110010	false
40174	444.36027457	1	1101110110 (1) 1101110100	false
40175	18.99114893	1	0110101101 (1) 0010101101	false
40176	105.25023582	1	0110101101 (1) 0100101101	false
40177	87.43401247	1	0110101101 (1) 0110001101	false
40178	52.90928441	1	0110101101 (1) 0110111101	false
40179	20.9428275	1	0110101101 (1) 0110100101	false
40180	24.6724771	1	0110101001 (1) 0010101001	false
40181	127.88681053	1	0110101001 (1) 0100101001	false
40182	82.32768361	1	0110101001 (1) 0110001001	false
40183	58.84650589	1	0110101001 (1) 0110111001	false
40184	68.20204675	1	0110101001 (1) 0110100001	false
40185	42.78135406	1	0110101001 (1) 0110101101	false
40186	450.29908268	1	1110101101 (1) 1100101101	false
40187	115.75121807	1	1110101101 (1) 1110001101	false
40188	417.11190801	1	1110101101 (1) 1110111101	false
40189	41.09965723	1	1110101101 (1) 1110100101	false
40190	332.85351327	1	0001110110 (1) 0011110110	false
40191	372.45844965	1	0001110110 (1) 0001110010	false
40192	569.88018331	1	0001110110 (1) 0001110100	false
40193	451.25368318	1	1001110110 (1) 1011110110	false
40194	353.5884625	1	1001110110 (1) 1001110010	false
40195	777.71831734	1	1001110110 (1) 1001110100	false
40196	352.89227337	1	1110101001 (1) 1100101001	false
40197	72.1760967	1	1110101001 (1) 1110001001	false
40198	346.73625842	1	1110101001 (1) 1110111001	false
40199	159.47845051	1	1110101001 (1) 1110100001	false
40200	71.66577335	1	1110101001 (1) 1110101101	false
40201	149.1807328	1	1010101101 (1) 1110101101	false
40202	48.96623403	1	1010101101 (1) 1010001101	false
40203	15.06724635	1	1010101101 (1) 1010111101	false
40204	18.53749533	1	1010101101 (1) 1010100101	false
40205	43.20513796	1	0010101101 (1) 0010001101	false
40206	27.07479511	1	0010101101 (1) 0010111101	false
40207	17.49328847	1	0010101101 (1) 0010100101	false
40208	83.92234185	1	0111111001 (1) 0011111001	false
40209	26.75033246	1	0111111001 (1) 0101111001	false
40210	227.22766065	1	0111111001 (1) 0110111001	false
40211	42.22137512	1	0111111001 (1) 0111111101	false
40212	46.31793017	1	0111110101 (1) 0011110101	false
40213	39.59562008	1	0111110101 (1) 0101110101	false
40214	143.61457658	1	0111110101 (1) 0110110101	false
40215	150.00702061	1	0111110101 (1) 0111111101	false
40216	318.14277492	1	1111111001 (1) 1011111001	false
40217	45.09308712	1	1111111001 (1) 1101111001	false
40218	399.57340732	1	1111111001 (1) 1110111001	false
40219	69.41936701	1	1111111001 (1) 1111111101	false
40220	125.75238807	1	1111110101 (1) 1011110101	false
40221	84.09141617	1	1111110101 (1) 1101110101	false
40222	240.44629971	1	1111110101 (1) 1110110101	false
40223	330.84889917	1	1111110101 (1) 1111111101	false
40224	34.48969755	1	0110000111 (1) 0010000111	false
40225	136.95834191	1	0110000111 (1) 0100000111	false
40226	300.91638553	1	0110000111 (1) 0110100111	false
40227	167.01386442	1	0011111001 (1) 0010111001	false
40228	546.78883752	1	0011111001 (1) 0011011001	false
40229	65.63617797	1	0011111001 (1) 0011111101	false
40230	104.81481256	1	0011110101 (1) 0010110101	false
40231	481.3804852	1	0011110101 (1) 0011111101	false
40232	322.37381239	1	1011111001 (1) 1010111001	false
40233	3089.14007711	1	1011111001 (1) 1011011001	false
40234	132.93255099	1	1011111001 (1) 1011111101	false
40235	121.45297466	1	1011110101 (1) 1010110101	false
40236	1143.07688064	1	1011110101 (1) 1011111101	false
40237	304.2609223	1	1110000111 (1) 1100000111	false
40238	816.86211442	1	1110000111 (1) 1110100111	false
40239	65.90912012	1	0100101101 (1) 0000101101	false
40240	25.00953336	1	0100101101 (1) 0101101101	false
40241	89.53585847	1	0100101101 (1) 0100001101	false
40242	48.41421531	1	0100101101 (1) 0100111101	false
40243	22.0631206	1	0100101101 (1) 0100100101	false
40244	75.70018783	1	0100101001 (1) 0000101001	false
40245	33.68072103	1	0100101001 (1) 0101101001	false
40246	85.5243705	1	0100101001 (1) 0100001001	false
40247	51.12253951	1	0100101001 (1) 0100111001	false
40248	60.38794782	1	0100101001 (1) 0100100001	false
40249	40.45132442	1	0100101001 (1) 0100101101	false
40250	33.26611209	1	1100101101 (1) 1101101101	false
40251	80.96865122	1	1100101101 (1) 1100001101	false
40252	302.24331456	1	1100101101 (1) 1100111101	false
40253	31.26653159	1	1100101101 (1) 1100100101	false
40254	487.81385399	1	1010000111 (1) 1110000111	false
40255	654.04293184	1	1010000111 (1) 1010100111	false
40256	283.47810295	1	0010000111 (1) 0010100111	false
40257	47.01065591	1	0110110110 (1) 0010110110	false
40258	210.31763105	1	0110110110 (1) 0100110110	false
40259	200.69938795	1	0110110110 (1) 0110110010	false
40260	413.67300105	1	0110110110 (1) 0110110100	false
40261	70.78336218	1	1110110110 (1) 1010110110	false
40262	436.90680637	1	1110110110 (1) 1100110110	false
40263	328.52306986	1	1110110110 (1) 1110110010	false
40264	576.02074909	1	1110110110 (1) 1110110100	false
40265	53.09739982	1	1100101001 (1) 1101101001	false
40266	63.8538451	1	1100101001 (1) 1100001001	false
40267	270.90616981	1	1100101001 (1) 1100111001	false
40268	104.26212693	1	1100101001 (1) 1100100001	false
40269	53.39617219	1	1100101001 (1) 1100101101	false
40270	143.06695776	1	1010101001 (1) 1110101001	false
40271	119.19848962	1	1010101001 (1) 1010001001	false
40272	34.94528089	1	1010101001 (1) 1010111001	false
40273	65.27028054	1	1010101001 (1) 1010100001	false
40274	29.2323764	1	1010101001 (1) 1010101101	false
40275	8.91944444	1	1001101001 (1) 1101101001	false
40276	179.818465	1	1001101001 (1) 1011101001	false
40277	44.91149369	1	1001101001 (1) 1001001001	false
40278	22.33089154	1	1001101001 (1) 1001111001	false
40279	48.96144826	1	1001101001 (1) 1001100001	false
40280	36.49214717	1	1001101001 (1) 1001101101	false
40281	23.09513759	1	1000101101 (1) 1100101101	false
40282	22.47104366	1	1000101101 (1) 1010101101	false
40283	39.42110607	1	1000101101 (1) 1001101101	false
40284	53.29929565	1	1000101101 (1) 1000001101	false
40285	18.81487757	1	1000101101 (1) 1000111101	false
40286	13.62087302	1	1000101101 (1) 1000100101	false
40287	33.42172056	1	1000101001 (1) 1100101001	false
40288	36.27525061	1	1000101001 (1) 1010101001	false
40289	67.93158632	1	1000101001 (1) 1001101001	false
40290	39.98099898	1	1000101001 (1) 1000001001	false
40291	19.95789652	1	1000101001 (1) 1000111001	false
40292	44.09060739	1	1000101001 (1) 1000100001	false
40293	32.79729704	1	1000101001 (1) 1000101101	false
40294	106.88508698	1	0010101001 (1) 0010001001	false
40295	49.9746991	1	0010101001 (1) 0010111001	false
40296	57.05623303	1	0010101001 (1) 0010100001	false
40297	24.70290299	1	0010101001 (1) 0010101101	false
40298	268.91674195	1	0001101001 (1) 0011101001	false
40299	41.22592342	1	0001101001 (1) 0001001001	false
40300	59.69378386	1	0001101001 (1) 0001111001	false
40301	87.39756661	1	0001101001 (1) 0001100001	false
40302	55.67644455	1	0001101001 (1) 0001101101	false
40303	16.41111403	1	0000101101 (1) 0010101101	false
40304	35.5825699	1	0000101101 (1) 0001101101	false
40305	47.11804156	1	0000101101 (1) 0000001101	false
40306	32.6608173	1	0000101101 (1) 0000111101	false
40307	17.90690177	1	0000101101 (1) 0000100101	false
40308	24.96793951	1	0000101001 (1) 0010101001	false
40309	46.03972697	1	0000101001 (1) 0001101001	false
40310	27.08851339	1	0000101001 (1) 0000001001	false
40311	31.2376936	1	0000101001 (1) 0000111001	false
40312	42.25504328	1	0000101001 (1) 0000100001	false
40313	29.06427035	1	0000101001 (1) 0000101101	false
40314	478.78565749	1	0010110110 (1) 0010110010	false
40315	533.5121274	1	0010110110 (1) 0010110100	false
40316	437.20762254	1	1010110110 (1) 1010110010	false
40317	603.95686028	1	1010110110 (1) 1010110100	false
40318	281.85837263	1	0101111001 (1) 0001111001	false
40319	46.68105134	1	0101111001 (1) 0101111101	false
40320	178.1977135	1	0101110101 (1) 0001110101	false
40321	138.3919709	1	0101110101 (1) 0101111101	false
40322	1853.31292528	1	1101111001 (1) 1001111001	false
40323	124.87144166	1	1101111001 (1) 1101111101	false
40324	669.72567183	1	1101110101 (1) 1001110101	false
40325	499.55224676	1	1101110101 (1) 1101111101	false
40326	56.38798401	1	0111101001 (1) 0011101001	false
40327	28.81219667	1	0111101001 (1) 0101101001	false
40328	148.09518912	1	0111101001 (1) 0110101001	false
40329	43.67437325	1	0111101001 (1) 0111111001	false
40330	65.64543007	1	0111101001 (1) 0111100001	false
40331	39.06105194	1	0111101001 (1) 0111101101	false
40332	10.77943682	1	0111001101 (1) 0011001101	false
40333	22.40849279	1	0111001101 (1) 0101001101	false
40334	25.46490551	1	0111001101 (1) 0110001101	false
40335	66.16544199	1	0111001101 (1) 0111101101	false
40336	31.43691842	1	0111001101 (1) 0111000101	false
40337	59.12018132	1	0111001101 (1) 0111001111	false
40338	12.12220229	1	0111001011 (1) 0011001011	false
40339	29.37996264	1	0111001011 (1) 0101001011	false
40340	18.43094394	1	0111001011 (1) 0110001011	false
40341	261.05983917	1	0111001011 (1) 0111101011	false
40342	46.91373766	1	0111001011 (1) 0111000011	false
40343	43.22498539	1	0111001011 (1) 0111001111	false
40344	15.99843356	1	0111001001 (1) 0011001001	false
40345	25.55232978	1	0111001001 (1) 0101001001	false
40346	25.13745058	1	0111001001 (1) 0110001001	false
40347	105.18994402	1	0111001001 (1) 0111101001	false
40348	48.97735493	1	0111001001 (1) 0111000001	false
40349	38.03447532	1	0111001001 (1) 0111001101	false
40350	86.06583554	1	0111001001 (1) 0111001011	false
40351	366.79423413	1	0001111001 (1) 0011111001	false
40352	199.50028689	1	0001111001 (1) 0001011001	false
40353	85.69293665	1	0001111001 (1) 0001111101	false
40354	220.6864959	1	0001110101 (1) 0011110101	false
40355	642.21976568	1	0001110101 (1) 0001111101	false
40356	128.9461006	1	0100000111 (1) 0000000111	false
40357	92.25935858	1	0100000111 (1) 0101000111	false
40358	367.33405881	1	0100000111 (1) 0100100111	false
40359	34.70436242	1	1111101001 (1) 1101101001	false
40360	660.62227415	1	1111101001 (1) 1110101001	false
40361	409.51062181	1	1111101001 (1) 1111111001	false
40362	198.85006628	1	1111101001 (1) 1111100001	false
40363	75.34954279	1	1111101001 (1) 1111101101	false
40364	84.91936852	1	1111001101 (1) 1101001101	false
40365	95.60826901	1	1111001101 (1) 1110001101	false
40366	1255.59787165	1	1111001101 (1) 1111101101	false
40367	184.75255946	1	1111001101 (1) 1111000101	false
40368	579.86314358	1	1111001101 (1) 1111001111	false
40369	46.81402414	1	1111001011 (1) 1101001011	false
40370	35.4236093	1	1111001011 (1) 1110001011	false
40371	1876.72806971	1	1111001011 (1) 1111101011	false
40372	147.37425532	1	1111001011 (1) 1111000011	false
40373	106.82738426	1	1111001011 (1) 1111001111	false
40374	2196.44875133	1	1001111001 (1) 1011111001	false
40375	661.09348885	1	1001111001 (1) 1001011001	false
40376	198.86684507	1	1001111001 (1) 1001111101	false
40377	434.44041387	1	1001110101 (1) 1011110101	false
40378	1358.47022389	1	1001110101 (1) 1001111101	false
40379	115.39831737	1	1100000111 (1) 1101000111	false
40380	686.78884562	1	1100000111 (1) 1100100111	false
40381	62.02172573	1	0000000111 (1) 0010000111	false
40382	132.34756903	1	0000000111 (1) 0001000111	false
40383	479.99138578	1	0000000111 (1) 0000100111	false
40384	75.02000506	1	0111111010 (1) 0011111010	false
40385	39.38896789	1	0111111010 (1) 0101111010	false
40386	194.34417088	1	0111111010 (1) 0110111010	false
40387	40.65749267	1	0111111010 (1) 0111110010	false
40388	103.06102578	1	0111111010 (1) 0111111110	false
40389	56.77604707	1	0111111010 (1) 0111111000	false
40390	167.83784512	1	0100110110 (1) 0000110110	false
40391	82.77809858	1	0100110110 (1) 0101110110	false
40392	233.485843	1	0100110110 (1) 0100110010	false
40393	469.52909589	1	0100110110 (1) 0100110100	false
40394	40.72448322	1	1111001001 (1) 1101001001	false
40395	50.21750677	1	1111001001 (1) 1110001001	false
40396	1059.7080206	1	1111001001 (1) 1111101001	false
40397	184.6109104	1	1111001001 (1) 1111000001	false
40398	89.48872028	1	1111001001 (1) 1111001101	false
40399	469.18950349	1	1111001001 (1) 1111001011	false
40400	2220.04230437	1	1011001101 (1) 1111001101	false
40401	208.83730731	1	1011001101 (1) 1010001101	false
40402	547.57938174	1	1011001101 (1) 1011000101	false
40403	675.71413716	1	1011001101 (1) 1011001111	false
40404	1604.46699449	1	1011001011 (1) 1111001011	false
40405	52.17057512	1	1011001011 (1) 1001001011	false
40406	88.34563813	1	1011001011 (1) 1010001011	false
40407	146.4004207	1	1011001011 (1) 1011000011	false
40408	89.93234863	1	1011001011 (1) 1011001111	false
40409	1740.88685658	1	1011001001 (1) 1111001001	false
40410	74.41561533	1	1011001001 (1) 1001001001	false
40411	162.05112392	1	1011001001 (1) 1010001001	false
40412	246.74059332	1	1011001001 (1) 1011000001	false
40413	123.80590815	1	1011001001 (1) 1011001101	false
40414	529.9669551	1	1011001001 (1) 1011001011	false
40415	90.48053987	1	0011001101 (1) 0010001101	false
40416	226.96665619	1	0011001101 (1) 0011000101	false
40417	111.22252617	1	0011001101 (1) 0011001111	false
40418	30.70155872	1	0011001011 (1) 0001001011	false
40419	60.017733	1	0011001011 (1) 0010001011	false
40420	48.84167889	1	0011001011 (1) 0011000011	false
40421	30.08674906	1	0011001011 (1) 0011001111	false
40422	42.97983281	1	0011001001 (1) 0001001001	false
40423	95.08563135	1	0011001001 (1) 0010001001	false
40424	68.84687031	1	0011001001 (1) 0011000001	false
40425	39.34528085	1	0011001001 (1) 0011001101	false
40426	74.1404866	1	0011001001 (1) 0011001011	false
40427	100.27478484	1	1000000111 (1) 1100000111	false
40428	122.41698237	1	1000000111 (1) 1010000111	false
40429	195.17469261	1	1000000111 (1) 1001000111	false
40430	718.51950857	1	1000000111 (1) 1000100111	false
40431	322.45250521	1	1111111010 (1) 1011111010	false
40432	76.69556719	1	1111111010 (1) 1101111010	false
40433	693.09520414	1	1111111010 (1) 1110111010	false
40434	78.23668841	1	1111111010 (1) 1111110010	false
40435	241.42389113	1	1111111010 (1) 1111111110	false
40436	117.64140077	1	1111111010 (1) 1111111000	false
40437	407.53813756	1	1100110110 (1) 1000110110	false
40438	188.78787004	1	1100110110 (1) 1101110110	false
40439	364.51248436	1	1100110110 (1) 1100110010	false
40440	699.70575405	1	1100110110 (1) 1100110100	false
40441	406.8264831	1	1011111010 (1) 1010111010	false
40442	894.84893545	1	1011111010 (1) 1011011010	false
40443	95.84805473	1	1011111010 (1) 1011110010	false
40444	217.84996351	1	1011111010 (1) 1011111110	false
40445	208.50675097	1	1011111010 (1) 1011111000	false
40446	252.56541984	1	0011111010 (1) 0010111010	false
40447	276.6134882	1	0011111010 (1) 0011011010	false
40448	50.10182732	1	0011111010 (1) 0011110010	false
40449	102.43153941	1	0011111010 (1) 0011111110	false
40450	93.16726054	1	0011111010 (1) 0011111000	false
40451	65.57778969	1	0000110110 (1) 0010110110	false
40452	160.66255334	1	0000110110 (1) 0001110110	false
40453	428.19063824	1	0000110110 (1) 0000110010	false
40454	646.99360583	1	0000110110 (1) 0000110100	false
40455	83.19229356	1	1000110110 (1) 1010110110	false
40456	211.0953352	1	1000110110 (1) 1001110110	false
40457	310.60150422	1	1000110110 (1) 1000110010	false
40458	655.59585169	1	1000110110 (1) 1000110100	false
40459	39.53335443	1	0110111001 (1) 0010111001	false
40460	208.21123297	1	0110111001 (1) 0100111001	false
40461	383.26551457	1	0110111001 (1) 0110011001	false
40462	75.6357725	1	0110111001 (1) 0110111101	false
40463	42.71579859	1	0110110101 (1) 0010110101	false
40464	223.76267541	1	0110110101 (1) 0100110101	false
40465	596.43053293	1	0110110101 (1) 0110111101	false
40466	343.74055797	1	0101101001 (1) 0001101001	false
40467	46.07567614	1	0101101001 (1) 0101111001	false
40468	83.90383672	1	0101101001 (1) 0101100001	false
40469	53.76599278	1	0101101001 (1) 0101101101	false
40470	63.65242136	1	0101001101 (1) 0001001101	false
40471	295.0371362	1	0101001101 (1) 0101101101	false
40472	82.83699721	1	0101001101 (1) 0101000101	false
40473	160.99919044	1	0101001101 (1) 0101001111	false
40474	22.27508875	1	0101001011 (1) 0001001011	false
40475	621.23229137	1	0101001011 (1) 0101101011	false
40476	74.61253264	1	0101001011 (1) 0101000011	false
40477	77.49595784	1	0101001011 (1) 0101001111	false
40478	78.3270022	1	1110111001 (1) 1010111001	false
40479	455.02033654	1	1110111001 (1) 1100111001	false
40480	587.79359725	1	1110111001 (1) 1110011001	false
40481	105.54921529	1	1110111001 (1) 1110111101	false
40482	80.77333832	1	1110110101 (1) 1010110101	false
40483	590.46913985	1	1110110101 (1) 1100110101	false
40484	1285.78026539	1	1110110101 (1) 1110111101	false
40485	893.30944624	1	1101101001 (1) 1101111001	false
40486	189.29597459	1	1101101001 (1) 1101100001	false
40487	78.1981489	1	1101101001 (1) 1101101101	false
40488	545.34568956	1	1101001101 (1) 1101101101	false
40489	120.1872436	1	1101001101 (1) 1101000101	false
40490	242.75151537	1	1101001101 (1) 1101001111	false
40491	1690.2763937	1	1101001011 (1) 1101101011	false
40492	148.01712558	1	1101001011 (1) 1101000011	false
40493	114.87795145	1	1101001011 (1) 1101001111	false
40494	36.06022163	1	0111100110 (1) 0011100110	false
40495	33.91718748	1	0111100110 (1) 0101100110	false
40496	101.31100412	1	0111100110 (1) 0110100110	false
40497	96.06395158	1	0111100110 (1) 0111110110	false
40498	63.04094919	1	0111100110 (1) 0111100010	false
40499	97.17463752	1	0111100110 (1) 0111100100	false
40500	67.42167906	1	1111100110 (1) 1101100110	false
40501	259.53715786	1	1111100110 (1) 1110100110	false
40502	530.77776712	1	1111100110 (1) 1111110110	false
40503	170.73981741	1	1111100110 (1) 1111100010	false
40504	237.47992704	1	1111100110 (1) 1111100100	false
40505	291.48187791	1	1001001101 (1) 1101001101	false
40506	1131.21495801	1	1001001101 (1) 1011001101	false
40507	554.61747713	1	1001001101 (1) 1001000101	false
40508	399.8630295	1	1001001101 (1) 1001001111	false
40509	775.04219496	1	1001001011 (1) 1101001011	false
40510	115.28262772	1	1001001011 (1) 1001000011	false
40511	290.67207356	1	1001001011 (1) 1001001111	false
40512	537.61954235	1	0101111010 (1) 0001111010	false
40513	52.46552003	1	0101111010 (1) 0101110010	false
40514	146.17828073	1	0101111010 (1) 0101111110	false
40515	63.75710554	1	0101111010 (1) 0101111000	false
40516	422.42407258	1	0010111001 (1) 0010011001	false
40517	44.28973027	1	0010111001 (1) 0010111101	false
40518	404.61190294	1	0010110101 (1) 0010111101	false
40519	115.27498808	1	0011100110 (1) 0010100110	false
40520	169.52375197	1	0011100110 (1) 0011110110	false
40521	273.84719705	1	0011100110 (1) 0011100010	false
40522	189.82263229	1	0011100110 (1) 0011100100	false
40523	489.86912364	1	1011100110 (1) 1111100110	false
40524	225.01581184	1	1011100110 (1) 1010100110	false
40525	143.28938773	1	1011100110 (1) 1011110110	false
40526	432.76946599	1	1011100110 (1) 1011100010	false
40527	297.28136839	1	1011100110 (1) 1011100100	false
40528	192.61541214	1	0001001101 (1) 0011001101	false
40529	274.16545123	1	0001001101 (1) 0001000101	false
40530	131.15997013	1	0001001101 (1) 0001001111	false
40531	60.22893463	1	0001001011 (1) 0001000011	false
40532	99.80779921	1	0001001011 (1) 0001001111	false
40533	859.24507932	1	1010111001 (1) 1010011001	false
40534	58.68862181	1	1010111001 (1) 1010111101	false
40535	671.1527508	1	1010110101 (1) 1010111101	false
40536	2246.97940538	1	1101111010 (1) 1001111010	false
40537	128.04774772	1	1101111010 (1) 1101110010	false
40538	480.54050875	1	1101111010 (1) 1101111110	false
40539	228.0110128	1	1101111010 (1) 1101111000	false
40540	121.08513234	1	1011101010 (1) 1111101010	false
40541	76.81377564	1	1011101010 (1) 1010101010	false
40542	24.50009612	1	1011101010 (1) 1011001010	false
40543	107.61223025	1	1011101010 (1) 1011111010	false
40544	37.239531	1	1011101010 (1) 1011100010	false
40545	65.0835668	1	1011101010 (1) 1011101000	false
40546	1424.81545231	1	1001111010 (1) 1011111010	false
40547	270.93728487	1	1001111010 (1) 1001011010	false
40548	110.34327664	1	1001111010 (1) 1001110010	false
40549	393.02938119	1	1001111010 (1) 1001111110	false
40550	231.02444737	1	1001111010 (1) 1001111000	false
40551	186.15895358	1	0011101010 (1) 0010101010	false
40552	34.40640893	1	0011101010 (1) 0011001010	false
40553	247.90200956	1	0011101010 (1) 0011111010	false
40554	45.95793071	1	0011101010 (1) 0011100010	false
40555	81.05255661	1	0011101010 (1) 0011101000	false
40556	459.95752069	1	0001111010 (1) 0011111010	false
40557	92.62318892	1	0001111010 (1) 0001011010	false
40558	54.30080952	1	0001111010 (1) 0001110010	false
40559	154.49233644	1	0001111010 (1) 0001111110	false
40560	86.61441507	1	0001111010 (1) 0001111000	false
40561	34.18062097	1	1111011110 (1) 1011011110	false
40562	38.65762358	1	1111011110 (1) 1101011110	false
40563	47.23612474	1	1111011110 (1) 1110011110	false
40564	103.77089689	1	1111011110 (1) 1111111110	false
40565	97.9234773	1	1111011110 (1) 1111001110	false
40566	90.95351037	1	1111011110 (1) 1111010110	false
40567	18.76041837	1	0111011110 (1) 0011011110	false
40568	36.32139452	1	0111011110 (1) 0101011110	false
40569	43.68357037	1	0111011110 (1) 0110011110	false
40570	90.99619389	1	0111011110 (1) 0111111110	false
40571	165.4930816	1	0111011110 (1) 0111001110	false
40572	86.96622433	1	0111011110 (1) 0111010110	false
40573	101.84797868	1	0100111001 (1) 0000111001	false
40574	37.69127226	1	0100111001 (1) 0101111001	false
40575	421.34214696	1	0100111001 (1) 0100011001	false
40576	74.89342815	1	0100111001 (1) 0100111101	false
40577	161.62623976	1	0100110101 (1) 0000110101	false
40578	66.06543787	1	0100110101 (1) 0101110101	false
40579	821.84940398	1	0100110101 (1) 0100111101	false
40580	359.06414756	1	1100111001 (1) 1000111001	false
40581	147.7273979	1	1100111001 (1) 1101111001	false
40582	548.78691426	1	1100111001 (1) 1100011001	false
40583	116.29212296	1	1100111001 (1) 1100111101	false
40584	562.19558391	1	1100110101 (1) 1000110101	false
40585	187.66874876	1	1100110101 (1) 1101110101	false
40586	1635.1084701	1	1100110101 (1) 1100111101	false
40587	153.94609455	1	0101100110 (1) 0001100110	false
40588	84.91144037	1	0101100110 (1) 0101110110	false
40589	71.90317357	1	0101100110 (1) 0101100010	false
40590	91.04454486	1	0101100110 (1) 0101100100	false
40591	166.53565467	1	0011011110 (1) 0010011110	false
40592	288.61907264	1	0011011110 (1) 0011001110	false
40593	767.49399501	1	0011011110 (1) 0011010110	false
40594	530.60689055	1	1101100110 (1) 1101110110	false
40595	118.14623752	1	1101100110 (1) 1101100010	false
40596	213.35561113	1	1101100110 (1) 1101100100	false
40597	278.81783534	1	1011011110 (1) 1010011110	false
40598	2434.77710324	1	1011011110 (1) 1011001110	false
40599	950.72064795	1	1011011110 (1) 1011010110	false
40600	49.01662024	1	0000111001 (1) 0010111001	false
40601	71.17925174	1	0000111001 (1) 0001111001	false
40602	116.41443013	1	0000111001 (1) 0000011001	false
40603	50.59481543	1	0000111001 (1) 0000111101	false
40604	60.80284986	1	0000110101 (1) 0010110101	false
40605	127.20836274	1	0000110101 (1) 0001110101	false
40606	591.34465056	1	0000110101 (1) 0000111101	false
40607	32.13030495	1	0110001101 (1) 0010001101	false
40608	185.68431578	1	0110001101 (1) 0100001101	false
40609	166.32455198	1	0110001101 (1) 0110000101	false
40610	85.4116929	1	0110001101 (1) 0110001111	false
40611	24.67186026	1	0110001011 (1) 0010001011	false
40612	175.3303569	1	0110001011 (1) 0100001011	false
40613	55.08726068	1	0110001011 (1) 0110000011	false
40614	54.75809283	1	0110001011 (1) 0110001111	false
40615	35.52314744	1	0110001001 (1) 0010001001	false
40616	183.259519	1	0110001001 (1) 0100001001	false
40617	67.41365513	1	0110001001 (1) 0110000001	false
40618	64.47869995	1	0110001001 (1) 0110001101	false
40619	67.0569381	1	0110001001 (1) 0110001011	false
40620	85.0422834	1	1000111001 (1) 1010111001	false
40621	276.40779407	1	1000111001 (1) 1001111001	false
40622	241.82121235	1	1000111001 (1) 1000011001	false
40623	87.33841724	1	1000111001 (1) 1000111101	false
40624	82.26808091	1	1000110101 (1) 1010110101	false
40625	234.85016451	1	1000110101 (1) 1001110101	false
40626	957.85732168	1	1000110101 (1) 1000111101	false
40627	507.15709523	1	1110001101 (1) 1100001101	false
40628	370.4598099	1	1110001101 (1) 1110000101	false
40629	171.60704843	1	1110001101 (1) 1110001111	false
40630	314.91770803	1	1110001011 (1) 1100001011	false
40631	76.35850024	1	1110001011 (1) 1110000011	false
40632	72.64505725	1	1110001011 (1) 1110001111	false
40633	228.54589154	1	0001100110 (1) 0011100110	false
40634	154.39939658	1	0001100110 (1) 0001110110	false
40635	265.79648042	1	0001100110 (1) 0001100010	false
40636	179.91310797	1	0001100110 (1) 0001100100	false
40637	73.44052279	1	1001100110 (1) 1101100110	false
40638	398.77866694	1	1001100110 (1) 1011100110	false
40639	129.67621549	1	1001100110 (1) 1001110110	false
40640	409.06940827	1	1001100110 (1) 1001100010	false
40641	240.16108245	1	1001100110 (1) 1001100100	false
40642	202.52243496	1	0010001101 (1) 0010000101	false
40643	99.72154638	1	0010001101 (1) 0010001111	false
40644	134.92510323	1	0010001011 (1) 0000001011	false
40645	61.16529626	1	0010001011 (1) 0010000011	false
40646	30.8645325	1	0010001011 (1) 0010001111	false
40647	199.47330531	1	0010001001 (1) 0000001001	false
40648	82.90080029	1	0010001001 (1) 0010000001	false
40649	38.49720167	1	0010001001 (1) 0010001101	false
40650	78.14485682	1	0010001001 (1) 0010001011	false
40651	292.75470801	1	1110001001 (1) 1100001001	false
40652	95.11312808	1	1110001001 (1) 1110000001	false
40653	86.10822196	1	1110001001 (1) 1110001101	false
40654	95.95881476	1	1110001001 (1) 1110001011	false
40655	683.59183886	1	1010001101 (1) 1110001101	false
40656	509.84185538	1	1010001101 (1) 1010000101	false
40657	205.67736599	1	1010001101 (1) 1010001111	false
40658	182.51578632	1	1010001011 (1) 1110001011	false
40659	346.1311765	1	1010001011 (1) 1000001011	false
40660	99.46128768	1	1010001011 (1) 1010000011	false
40661	55.20665114	1	1010001011 (1) 1010001111	false
40662	246.77099275	1	1010001001 (1) 1110001001	false
40663	436.47160292	1	1010001001 (1) 1000001001	false
40664	146.32885117	1	1010001001 (1) 1010000001	false
40665	73.79368974	1	1010001001 (1) 1010001101	false
40666	148.85090981	1	1010001001 (1) 1010001011	false
40667	32.23330623	1	0110111010 (1) 0010111010	false
40668	165.05142092	1	0110111010 (1) 0100111010	false
40669	116.60832161	1	0110111010 (1) 0110011010	false
40670	41.72691714	1	0110111010 (1) 0110110010	false
40671	118.664508	1	0110111010 (1) 0110111110	false
40672	77.35505149	1	0110111010 (1) 0110111000	false
40673	27.87835904	1	0110101010 (1) 0010101010	false
40674	141.09975253	1	0110101010 (1) 0100101010	false
40675	12.78174698	1	0110101010 (1) 0110001010	false
40676	168.2953545	1	0110101010 (1) 0110111010	false
40677	39.48966076	1	0110101010 (1) 0110100010	false
40678	64.95156318	1	0110101010 (1) 0110101000	false
40679	131.07476254	1	1110111010 (1) 1010111010	false
40680	640.48376808	1	1110111010 (1) 1100111010	false
40681	332.55011021	1	1110111010 (1) 1110011010	false
40682	72.6821597	1	1110111010 (1) 1110110010	false
40683	227.32450214	1	1110111010 (1) 1110111110	false
40684	125.9383125	1	1110111010 (1) 1110111000	false
40685	35.07523573	1	1111011001 (1) 1011011001	false
40686	22.80498331	1	1111011001 (1) 1101011001	false
40687	32.94029094	1	1111011001 (1) 1110011001	false
40688	14.90945166	1	1111011001 (1) 1111111001	false
40689	57.05228818	1	1111011001 (1) 1111001001	false
40690	34.04224004	1	1111011001 (1) 1111011101	false
40691	94.08379057	1	1111011001 (1) 1111011011	false
40692	16.82370945	1	1111010101 (1) 1011010101	false
40693	19.08433925	1	1111010101 (1) 1101010101	false
40694	32.38242391	1	1111010101 (1) 1110010101	false
40695	9.48161977	1	1111010101 (1) 1111110101	false
40696	10.61450341	1	1111010101 (1) 1111000101	false
40697	42.61117703	1	1111010101 (1) 1111011101	false
40698	17.38542932	1	1111010101 (1) 1111010111	false
40699	21.66635203	1	1111010011 (1) 1011010011	false
40700	20.62087504	1	1111010011 (1) 1101010011	false
40701	22.70107337	1	1111010011 (1) 1110010011	false
40702	174.23487952	1	1111010011 (1) 1111110011	false
40703	26.65341658	1	1111010011 (1) 1111000011	false
40704	30.48141912	1	1111010011 (1) 1111010111	false
40705	28.04328065	1	1111010001 (1) 1011010001	false
40706	19.38118515	1	1111010001 (1) 1101010001	false
40707	32.24058453	1	1111010001 (1) 1110010001	false
40708	17.66042569	1	1111010001 (1) 1111110001	false
40709	15.00833866	1	1111010001 (1) 1111000001	false
40710	62.90828044	1	1111010001 (1) 1111011001	false
40711	30.38320214	1	1111010001 (1) 1111010101	false
40712	25.37470275	1	1111010001 (1) 1111010011	false
40713	20.72906717	1	0111011001 (1) 0011011001	false
40714	24.87552671	1	0111011001 (1) 0101011001	false
40715	32.71231237	1	0111011001 (1) 0110011001	false
40716	14.90945166	1	0111011001 (1) 0111111001	false
40717	99.95582375	1	0111011001 (1) 0111001001	false
40718	37.54070431	1	0111011001 (1) 0111011101	false
40719	99.95582375	1	0111011001 (1) 0111011011	false
40720	11.88330593	1	0111010101 (1) 0011010101	false
40721	17.73664002	1	0111010101 (1) 0101010101	false
40722	31.02248519	1	0111010101 (1) 0110010101	false
40723	9.48161977	1	0111010101 (1) 0111110101	false
40724	17.62992353	1	0111010101 (1) 0111000101	false
40725	52.75012025	1	0111010101 (1) 0111011101	false
40726	17.62992353	1	0111010101 (1) 0111010111	false
40727	13.37307354	1	0111010011 (1) 0011010011	false
40728	20.31427383	1	0111010011 (1) 0101010011	false
40729	22.30464537	1	0111010011 (1) 0110010011	false
40730	156.59925331	1	0111010011 (1) 0111110011	false
40731	49.59898808	1	0111010011 (1) 0111000011	false
40732	30.18195664	1	0111010011 (1) 0111010111	false
40733	19.472237	1	0111010001 (1) 0011010001	false
40734	20.45039668	1	0111010001 (1) 0101010001	false
40735	31.81454103	1	0111010001 (1) 0110010001	false
40736	17.66042569	1	0111010001 (1) 0111110001	false
40737	27.39483583	1	0111010001 (1) 0111000001	false
40738	78.67870972	1	0111010001 (1) 0111011001	false
40739	32.13401822	1	0111010001 (1) 0111010101	false
40740	27.39483583	1	0111010001 (1) 0111010011	false
40741	620.40360705	1	1110101010 (1) 1100101010	false
40742	14.66037905	1	1110101010 (1) 1110001010	false
40743	867.95841103	1	1110101010 (1) 1110111010	false
40744	79.83027777	1	1110101010 (1) 1110100010	false
40745	137.89435261	1	1110101010 (1) 1110101000	false
40746	409.2025777	1	1010111010 (1) 1010011010	false
40747	40.72477914	1	1010111010 (1) 1010110010	false
40748	99.79699839	1	1010111010 (1) 1010111110	false
40749	118.02476665	1	1010111010 (1) 1010111000	false
40750	110.06032183	1	0101011110 (1) 0001011110	false
40751	307.17543445	1	0101011110 (1) 0101111110	false
40752	371.77604362	1	0101011110 (1) 0101001110	false
40753	181.13299983	1	0101011110 (1) 0101010110	false
40754	356.32209916	1	0010111010 (1) 0010011010	false
40755	33.1031005	1	0010111010 (1) 0010110010	false
40756	57.02169809	1	0010111010 (1) 0010111110	false
40757	79.90089615	1	0010111010 (1) 0010111000	false
40758	423.2452808	1	1101011110 (1) 1001011110	false
40759	420.72210519	1	1101011110 (1) 1101111110	false
40760	153.33124029	1	1101011110 (1) 1101001110	false
40761	310.7175225	1	1101011110 (1) 1101010110	false
40762	67.83561844	1	0011011001 (1) 0001011001	false
40763	173.93659553	1	0011011001 (1) 0010011001	false
40764	205.37630447	1	0011011001 (1) 0011001001	false
40765	57.34016847	1	0011011001 (1) 0011011101	false
40766	205.37630447	1	0011011001 (1) 0011011011	false
40767	45.32048893	1	0011010101 (1) 0010010101	false
40768	16.78350521	1	0011010101 (1) 0011110101	false
40769	33.52044686	1	0011010101 (1) 0011000101	false
40770	35.04673486	1	0011010101 (1) 0011011101	false
40771	33.52044686	1	0011010101 (1) 0011010111	false
40772	49.48748426	1	0011010011 (1) 0001010011	false
40773	99.86982215	1	0011010011 (1) 0010010011	false
40774	55.96303368	1	0011010011 (1) 0011000011	false
40775	75.55757022	1	0011010011 (1) 0011010111	false
40776	72.19145046	1	0011010001 (1) 0001010001	false
40777	189.54715939	1	0011010001 (1) 0010010001	false
40778	66.71636197	1	0011010001 (1) 0011000001	false
40779	156.34708668	1	0011010001 (1) 0011011001	false
40780	115.19404017	1	0011010001 (1) 0011010101	false
40781	66.71636197	1	0011010001 (1) 0011010011	false
40782	103.26062548	1	1011011001 (1) 1001011001	false
40783	328.63270555	1	1011011001 (1) 1010011001	false
40784	2613.3540465	1	1011011001 (1) 1011001001	false
40785	148.48182858	1	1011011001 (1) 1011011101	false
40786	685.01419781	1	1011011001 (1) 1011011011	false
40787	87.76133059	1	1011010101 (1) 1010010101	false
40788	16.39999871	1	1011010101 (1) 1011110101	false
40789	203.99171279	1	1011010101 (1) 1011000101	false
40790	116.15762201	1	1011010101 (1) 1011011101	false
40791	51.9364121	1	1011010101 (1) 1011010111	false
40792	65.81379225	1	1011010011 (1) 1001010011	false
40793	179.74512224	1	1011010011 (1) 1010010011	false
40794	1180.65466245	1	1011010011 (1) 1011000011	false
40795	150.93082161	1	1011010011 (1) 1011010111	false
40796	96.86008241	1	1011010001 (1) 1001010001	false
40797	355.36145639	1	1011010001 (1) 1010010001	false
40798	1253.84896453	1	1011010001 (1) 1011000001	false
40799	658.52809107	1	1011010001 (1) 1011011001	false
40800	221.08994364	1	1011010001 (1) 1011010101	false
40801	185.34449409	1	1011010001 (1) 1011010011	false
40802	452.32008341	1	0001011110 (1) 0011011110	false
40803	414.75475275	1	0001011110 (1) 0001001110	false
40804	1192.09779953	1	0001011110 (1) 0001010110	false
40805	1415.50469252	1	1001011110 (1) 1011011110	false
40806	1848.32907462	1	1001011110 (1) 1001001110	false
40807	1322.82119208	1	1001011110 (1) 1001010110	false
40808	26.42633026	1	0101001001 (1) 0001001001	false
40809	315.05859294	1	0101001001 (1) 0101101001	false
40810	75.84490389	1	0101001001 (1) 0101000001	false
40811	67.74346681	1	0101001001 (1) 0101001101	false
40812	157.77905561	1	0101001001 (1) 0101001011	false
40813	120.13056394	1	0100001101 (1) 0000001101	false
40814	317.16926378	1	0100001101 (1) 0101001101	false
40815	210.29430718	1	0100001101 (1) 0100000101	false
40816	150.59952587	1	0100001101 (1) 0100001111	false
40817	35.51294739	1	0100001011 (1) 0000001011	false
40818	360.67779676	1	0100001011 (1) 0101001011	false
40819	71.34634106	1	0100001011 (1) 0100000011	false
40820	75.83180241	1	0100001011 (1) 0100001111	false
40821	49.32677882	1	0100001001 (1) 0000001001	false
40822	302.42433344	1	0100001001 (1) 0101001001	false
40823	86.23905061	1	0100001001 (1) 0100000001	false
40824	88.14205011	1	0100001001 (1) 0100001101	false
40825	119.43545507	1	0100001001 (1) 0100001011	false
40826	808.35424324	1	1101001001 (1) 1101101001	false
40827	156.24840198	1	1101001001 (1) 1101000001	false
40828	90.93340733	1	1101001001 (1) 1101001101	false
40829	280.58978891	1	1101001001 (1) 1101001011	false
40830	474.07785311	1	1100001101 (1) 1101001101	false
40831	286.60678153	1	1100001101 (1) 1100000101	false
40832	176.06918119	1	1100001101 (1) 1100001111	false
40833	709.47801724	1	1100001011 (1) 1101001011	false
40834	98.19589404	1	1100001011 (1) 1100000011	false
40835	88.89095585	1	1100001011 (1) 1100001111	false
40836	39.84058525	1	0110100110 (1) 0010100110	false
40837	178.49267432	1	0110100110 (1) 0100100110	false
40838	165.20230933	1	0110100110 (1) 0110110110	false
40839	154.36792003	1	0110100110 (1) 0110100010	false
40840	172.7687587	1	0110100110 (1) 0110100100	false
40841	508.51756932	1	1110100110 (1) 1100100110	false
40842	756.48671016	1	1110100110 (1) 1110110110	false
40843	388.86371781	1	1110100110 (1) 1110100010	false
40844	424.69797745	1	1110100110 (1) 1110100100	false
40845	70.76453068	1	0001001001 (1) 0001000001	false
40846	119.77003549	1	0001001001 (1) 0001001101	false
40847	61.97735138	1	0001001001 (1) 0001001011	false
40848	50.65780795	1	0000001101 (1) 0010001101	false
40849	106.57196927	1	0000001101 (1) 0001001101	false
40850	228.16042067	1	0000001101 (1) 0000000101	false
40851	101.99853314	1	0000001101 (1) 0000001111	false
40852	52.09728182	1	0000001011 (1) 0001001011	false
40853	80.88050306	1	0000001011 (1) 0000000011	false
40854	127.21292386	1	0000001011 (1) 0000001111	false
40855	66.79251133	1	0000001001 (1) 0001001001	false
40856	93.68923147	1	0000001001 (1) 0000000001	false
40857	151.96357057	1	0000001001 (1) 0000001101	false
40858	70.53700356	1	0000001001 (1) 0000001011	false
40859	495.33783267	1	1100001001 (1) 1101001001	false
40860	116.19947384	1	1100001001 (1) 1100000001	false
40861	97.06855759	1	1100001001 (1) 1100001101	false
40862	139.60878254	1	1100001001 (1) 1100001011	false
40863	628.24023557	1	1001001001 (1) 1101001001	false
40864	153.2172158	1	1001001001 (1) 1001000001	false
40865	312.91118176	1	1001001001 (1) 1001001101	false
40866	235.56906999	1	1001001001 (1) 1001001011	false
40867	105.74262157	1	1000001101 (1) 1100001101	false
40868	114.09944138	1	1000001101 (1) 1010001101	false
40869	306.68433241	1	1000001101 (1) 1001001101	false
40870	561.39435538	1	1000001101 (1) 1000000101	false
40871	206.46474169	1	1000001101 (1) 1000001111	false
40872	283.39728213	1	1000001011 (1) 1100001011	false
40873	318.86077557	1	1000001011 (1) 1001001011	false
40874	124.71173083	1	1000001011 (1) 1000000011	false
40875	204.4388587	1	1000001011 (1) 1000001111	false
40876	268.82539159	1	1000001001 (1) 1100001001	false
40877	290.77628698	1	1000001001 (1) 1001001001	false
40878	161.04423552	1	1000001001 (1) 1000000001	false
40879	246.54413914	1	1000001001 (1) 1000001101	false
40880	152.18037942	1	1000001001 (1) 1000001011	false
40881	95.64010194	1	0100111010 (1) 0000111010	false
40882	39.54830638	1	0100111010 (1) 0101111010	false
40883	114.76269913	1	0100111010 (1) 0100011010	false
40884	38.23493429	1	0100111010 (1) 0100110010	false
40885	104.44534985	1	0100111010 (1) 0100111110	false
40886	66.93841171	1	0100111010 (1) 0100111000	false
40887	85.10049355	1	0100101010 (1) 0000101010	false
40888	38.65171658	1	0100101010 (1) 0101101010	false
40889	12.11833704	1	0100101010 (1) 0100001010	false
40890	135.51838238	1	0100101010 (1) 0100111010	false
40891	34.97863447	1	0100101010 (1) 0100100010	false
40892	53.85069129	1	0100101010 (1) 0100101000	false
40893	179.58206043	1	0010100110 (1) 0010110110	false
40894	292.32815961	1	0010100110 (1) 0010100010	false
40895	198.37398652	1	0010100110 (1) 0010100100	false
40896	463.57709735	1	1100111010 (1) 1000111010	false
40897	96.24623162	1	1100111010 (1) 1101111010	false
40898	232.4552616	1	1100111010 (1) 1100011010	false
40899	62.90048387	1	1100111010 (1) 1100110010	false
40900	187.97663639	1	1100111010 (1) 1100111110	false
40901	109.74687792	1	1100111010 (1) 1100111000	false
40902	651.11565888	1	1010100110 (1) 1110100110	false
40903	96.5561115	1	1010100110 (1) 1010110110	false
40904	424.0825769	1	1010100110 (1) 1010100010	false
40905	276.71153261	1	1010100110 (1) 1010100100	false
40906	31.73377761	1	0101011001 (1) 0001011001	false
40907	55.3588711	1	0101011001 (1) 0101111001	false
40908	214.87568629	1	0101011001 (1) 0101001001	false
40909	67.4982987	1	0101011001 (1) 0101011101	false
40910	214.87568629	1	0101011001 (1) 0101011011	false
40911	51.50771935	1	0101010101 (1) 0001010101	false
40912	11.32816592	1	0101010101 (1) 0101110101	false
40913	22.46104264	1	0101010101 (1) 0101000101	false
40914	60.69690008	1	0101010101 (1) 0101011101	false
40915	22.46104264	1	0101010101 (1) 0101010111	false
40916	26.76570039	1	0101010011 (1) 0001010011	false
40917	272.53891269	1	0101010011 (1) 0101110011	false
40918	84.59457753	1	0101010011 (1) 0101000011	false
40919	47.15842633	1	0101010011 (1) 0101010111	false
40920	87.68474195	1	1101011001 (1) 1001011001	false
40921	193.79758741	1	1101011001 (1) 1101111001	false
40922	75.82329	1	1101011001 (1) 1101001001	false
40923	92.6362348	1	1101011001 (1) 1101011101	false
40924	263.6565032	1	1101011001 (1) 1101011011	false
40925	137.85079916	1	1101010101 (1) 1001010101	false
40926	11.32816592	1	1101010101 (1) 1101110101	false
40927	11.71735614	1	1101010101 (1) 1101000101	false
40928	66.42512933	1	1101010101 (1) 1101011101	false
40929	29.38275475	1	1101010101 (1) 1101010111	false
40930	61.84703096	1	1101010011 (1) 1001010011	false
40931	556.63029479	1	1101010011 (1) 1101110011	false
40932	28.11042184	1	1101010011 (1) 1101000011	false
40933	79.35713531	1	1101010011 (1) 1101010111	false
40934	52.90612414	1	1100101010 (1) 1101101010	false
40935	12.53034035	1	1100101010 (1) 1100001010	false
40936	543.41882067	1	1100101010 (1) 1100111010	false
40937	48.96534851	1	1100101010 (1) 1100100010	false
40938	82.20467683	1	1100101010 (1) 1100101000	false
40939	161.91395422	1	1010101010 (1) 1110101010	false
40940	20.16453164	1	1010101010 (1) 1010001010	false
40941	113.80160797	1	1010101010 (1) 1010111010	false
40942	32.63338916	1	1010101010 (1) 1010100010	false
40943	60.90523953	1	1010101010 (1) 1010101000	false
40944	14.22575758	1	1001101010 (1) 1101101010	false
40945	146.98134098	1	1001101010 (1) 1011101010	false
40946	6.06060606	1	1001101010 (1) 1001001010	false
40947	83.61551773	1	1001101010 (1) 1001111010	false
40948	27.88088771	1	1001101010 (1) 1001100010	false
40949	45.28886974	1	1001101010 (1) 1001101000	false
40950	47.04626827	1	1000111010 (1) 1010111010	false
40951	130.55491927	1	1000111010 (1) 1001111010	false
40952	88.89874692	1	1000111010 (1) 1000011010	false
40953	36.73869164	1	1000111010 (1) 1000110010	false
40954	128.25052871	1	1000111010 (1) 1000111110	false
40955	74.75823838	1	1000111010 (1) 1000111000	false
40956	38.17916543	1	1000101010 (1) 1100101010	false
40957	36.32424608	1	1000101010 (1) 1010101010	false
40958	52.49280438	1	1000101010 (1) 1001101010	false
40959	5.49090909	1	1000101010 (1) 1000001010	false
40960	73.67029584	1	1000101010 (1) 1000111010	false
40961	24.96364808	1	1000101010 (1) 1000100010	false
40962	39.99246138	1	1000101010 (1) 1000101000	false
40963	23.96971949	1	0010101010 (1) 0010001010	false
40964	224.91156894	1	0010101010 (1) 0010111010	false
40965	27.91923529	1	0010101010 (1) 0010100010	false
40966	57.56876488	1	0010101010 (1) 0010101000	false
40967	411.57847548	1	0001101010 (1) 0011101010	false
40968	8.02525016	1	0001101010 (1) 0001001010	false
40969	257.53617617	1	0001101010 (1) 0001111010	false
40970	57.35424533	1	0001101010 (1) 0001100010	false
40971	92.77224473	1	0001101010 (1) 0001101000	false
40972	29.63749889	1	0000111010 (1) 0010111010	false
40973	55.83255211	1	0000111010 (1) 0001111010	false
40974	42.08140113	1	0000111010 (1) 0000011010	false
40975	27.31161365	1	0000111010 (1) 0000110010	false
40976	68.95063982	1	0000111010 (1) 0000111110	false
40977	41.2152001	1	0000111010 (1) 0000111000	false
40978	22.69534722	1	0000101010 (1) 0010101010	false
40979	46.28046883	1	0000101010 (1) 0001101010	false
40980	5.88743369	1	0000101010 (1) 0000001010	false
40981	83.38880376	1	0000101010 (1) 0000111010	false
40982	25.87917711	1	0000101010 (1) 0000100010	false
40983	36.1547679	1	0000101010 (1) 0000101000	false
40984	143.08731974	1	0001011001 (1) 0001001001	false
40985	148.25994536	1	0001011001 (1) 0001011101	false
40986	143.08731974	1	0001011001 (1) 0001011011	false
40987	113.11427663	1	0001010101 (1) 0011010101	false
40988	33.90798326	1	0001010101 (1) 0001110101	false
40989	46.08080997	1	0001010101 (1) 0001000101	false
40990	51.19991428	1	0001010101 (1) 0001011101	false
40991	46.08080997	1	0001010101 (1) 0001010111	false
40992	52.84090492	1	0001010011 (1) 0001000011	false
40993	213.75604365	1	0001010011 (1) 0001010111	false
40994	823.83430711	1	1001011001 (1) 1001001001	false
40995	368.23685113	1	1001011001 (1) 1001011101	false
40996	305.56161806	1	1001011001 (1) 1001011011	false
40997	262.33342311	1	1001010101 (1) 1011010101	false
40998	30.11907987	1	1001010101 (1) 1001110101	false
40999	204.49212073	1	1001010101 (1) 1001000101	false
41000	141.16162466	1	1001010101 (1) 1001011101	false
[truncated: 2,101 more rows]
