# Supplementary material
Source: publisher figshare collection journal article supplement (https://springernature.figshare.com/ndownloader/files/17562821)
Supplement: Supplementary file 1 [file 17562821 › CytoscapeSession-2018_09_25-21_15/tables/37972-STG%2C+Model+1/LOCAL_ATTRS-org.cytoscape.model.CyNetwork-STG%2C+Model+1+default++network.cytable]

"CyCSV-Version","1"
"SUID","__Annotations","name","selected"
"java.lang.Long","java.util.List<java.lang.String>","java.lang.String","java.lang.Boolean"
"","mutable","",""
"STG, Model 1 default  network",""
"37972","","STG, Model 1","false"
