# Supplementary material
Source: publisher figshare collection journal article supplement (https://springernature.figshare.com/ndownloader/files/17562821)
Supplement: Supplementary file 1 [file 17562821 › CytoscapeSession-2018_09_25-21_15/tables/37972-STG%2C+Model+1/LOCAL_ATTRS-org.cytoscape.model.CyNode-STG%2C+Model+1+default++node.cytable]

CyCSV-Version	1
SUID	AverageShortestPathLength	BetweennessCentrality	ClosenessCentrality	ClusteringCoefficient	Eccentricity	EdgeCount	Indegree	IsSingleNode	name	NeighborhoodConnectivity	Outdegree	PartnerOfMultiEdgedNodePairs	selected	SelfLoops	Stress
java.lang.Long	java.lang.Double	java.lang.Double	java.lang.Double	java.lang.Double	java.lang.Integer	java.lang.Integer	java.lang.Integer	java.lang.Boolean	java.lang.String	java.lang.Double	java.lang.Integer	java.lang.Integer	java.lang.Boolean	java.lang.Integer	java.lang.Long
	mutable	mutable	mutable	mutable	mutable	mutable	mutable	mutable		mutable	mutable	mutable		mutable	mutable
STG, Model 1 default node
37982	4.43137255	0.00223551	0.22566372	0.0	10	8	3	false	0111111111	8.0	5	0	false	0	3556
37983	4.37962963	0.01457717	0.22832981	0.0	8	8	3	false	1111111111	8.0	5	0	false	0	421946
37984	2.92	0.00352674	0.34246575	0.0	6	8	4	false	0011111111	8.0	4	0	false	0	13235
37985	6.42592593	0.00876433	0.1556196	0.0	13	8	4	false	1011111111	8.0	4	0	false	0	77549
37986	4.0952381	0.00580926	0.24418605	0.0	8	8	5	false	0101111111	8.0	3	0	false	0	24558
37987	7.03703704	0.02123988	0.14210526	0.0	15	8	5	false	1101111111	8.0	3	0	false	0	150252
37988	3.39473684	0.00583625	0.29457364	0.0	7	8	4	false	0001111111	8.0	4	0	false	0	23126
37989	6.25	0.01899793	0.16	0.0	14	8	4	false	1001111111	8.0	4	0	false	0	160454
37990	4.43877551	0.00289528	0.22528736	0.0	9	8	3	false	0110111111	8.0	5	0	false	0	7855
37991	4.98148148	0.01711465	0.20074349	0.0	11	8	3	false	1110111111	8.0	5	0	false	0	569732
37992	2.5	0.00116988	0.4	0.0	5	8	5	false	0010111111	8.0	3	0	false	0	2274
37993	9.43518519	0.00174754	0.10598626	0.0	17	8	5	false	1010111111	8.0	3	0	false	0	9987
37994	4.05882353	0.00256186	0.24637681	0.0	8	8	3	false	0100111111	8.0	5	0	false	0	8830
37995	5.0462963	0.01212044	0.19816514	0.0	11	8	3	false	1100111111	8.0	5	0	false	0	425954
37996	3.37254902	0.00152354	0.29651163	0.0	7	8	3	false	0000111111	8.0	5	0	false	0	4286
37997	5.31481481	0.00367778	0.18815331	0.0	12	8	3	false	1000111111	8.0	5	0	false	0	40455
37998	5.0	0.00260423	0.2	0.0	11	8	2	false	0111111011	8.0	6	0	false	0	6634
37999	3.58928571	0.00337153	0.27860697	0.0	6	8	2	false	0111101111	8.0	6	0	false	0	6119
38000	4.87892377	0.01073693	0.20496324	0.0	9	8	2	false	1111111011	8.0	6	0	false	0	86379
38001	4.35185185	0.04143438	0.22978723	0.0	9	8	3	false	1111101111	8.0	5	0	false	0	1369250
38002	5.90134529	0.02208258	0.16945289	0.0	12	8	3	false	1011111011	8.0	5	0	false	0	180100
38003	4.24107143	0.00174407	0.23578947	0.0	10	8	2	false	1011101111	8.0	6	0	false	0	4440
38004	4.07526882	0.00522482	0.24538259	0.0	8	8	3	false	0011111011	8.0	5	0	false	0	12822
38005	2.44827586	0.00341104	0.4084507	0.0	4	8	3	false	0011101111	8.0	5	0	false	0	28849
38006	5.08490566	0.00650743	0.19666048	0.0	10	8	4	false	0101111011	8.0	4	0	false	0	22730
38007	3.57692308	0.00891574	0.27956989	0.0	6	8	4	false	0101101111	8.0	4	0	false	0	75898
38008	7.07623318	0.03139493	0.14131812	0.0	14	8	4	false	1101111011	8.0	4	0	false	0	309825
38009	7.82407407	0.01625806	0.12781065	0.0	16	8	5	false	1101101111	8.0	3	0	false	0	95769
38010	4.30638298	0.00202692	0.23221344	0.0	9	8	1	false	1011101011	8.0	7	0	false	0	9022
38011	6.28699552	0.02731926	0.15905849	0.0	13	8	3	false	1001111011	8.0	5	0	false	0	269772
38012	4.35964912	9.2626E-4	0.22937626	0.0	11	8	2	false	1001101111	8.0	6	0	false	0	1977
38013	3.85714286	0.00427591	0.25925926	0.0	9	8	2	false	0011101011	8.0	6	0	false	0	16833
38014	4.36734694	0.0064059	0.22897196	0.0	9	8	3	false	0001111011	8.0	5	0	false	0	19804
38015	2.93181818	0.00612875	0.34108527	0.0	5	8	3	false	0001101111	8.0	5	0	false	0	54278
38016	3.99090909	0.00144368	0.25056948	0.0	8	8	2	false	1111011111	8.0	6	0	false	0	2027
38017	3.98275862	0.00153428	0.25108225	0.0	8	8	2	false	0111011111	8.0	6	0	false	0	3007
38018	6.12037037	0.02466932	0.1633888	0.0	12	8	5	false	1011011111	8.0	3	0	false	0	651137
38019	3.82608696	0.00626323	0.26136364	0.0	8	8	5	false	0011011111	8.0	3	0	false	0	53454
38020	4.97073171	0.00308348	0.20117763	0.0	10	8	2	false	0110111011	8.0	6	0	false	0	11673
38021	3.75961538	0.00223717	0.26598465	0.0	7	8	2	false	0110101111	8.0	6	0	false	0	5063
38022	4.37668161	0.00220448	0.22848361	0.0	9	8	1	false	0110101011	8.0	7	0	false	0	6622
38023	5.50672646	0.01127736	0.18159609	0.0	12	8	2	false	1110111011	8.0	6	0	false	0	148351
38024	5.10185185	0.02038306	0.19600726	0.0	12	8	3	false	1110101111	8.0	5	0	false	0	720183
38025	5.5426009	0.01387687	0.18042071	0.0	13	8	2	false	1110101011	8.0	6	0	false	0	129699
38026	8.79820628	0.00378253	0.11365953	0.0	21	8	4	false	1010111011	8.0	4	0	false	0	25052
38027	5.62727273	0.00136529	0.17770598	0.0	13	8	3	false	1010101111	8.0	5	0	false	0	3134
38028	4.6875	0.00244896	0.21333333	0.0	9	8	4	false	0010111011	8.0	4	0	false	0	5985
38029	2.0	9.5278E-4	0.5	0.0	3	8	4	false	0010101111	8.0	4	0	false	0	1741
38030	3.96428571	0.00843795	0.25225225	0.0	8	8	4	false	0101011111	8.0	4	0	false	0	68169
38031	6.34259259	0.01152772	0.15766423	0.0	14	8	4	false	1101011111	8.0	4	0	false	0	168223
38032	6.31632653	0.00265337	0.15831987	0.0	12	8	4	false	0111110111	8.0	4	0	false	0	14895
38033	6.42592593	0.00573665	0.1556196	0.0	12	8	4	false	1111110111	8.0	4	0	false	0	88688
38034	6.18518519	0.02881224	0.16167665	0.0	13	8	5	false	1001011111	8.0	3	0	false	0	729550
38035	4.28571429	0.00869138	0.23333333	0.0	9	8	5	false	0001011111	8.0	3	0	false	0	80125
38036	4.69565217	0.00454839	0.21296296	0.0	8	8	6	false	0011110111	8.0	2	0	false	0	19547
38037	8.50925926	0.0073254	0.11751904	0.0	15	8	6	false	1011110111	8.0	2	0	false	0	51453
38038	4.58100559	0.00259174	0.21829268	0.0	9	8	2	false	0100111011	8.0	6	0	false	0	15307
38039	3.40449438	0.00183004	0.29372937	0.0	6	8	2	false	0100101111	8.0	6	0	false	0	5081
38040	4.02094241	0.00175206	0.24869792	0.0	8	8	1	false	0100101011	8.0	7	0	false	0	8915
38041	5.61434978	0.0087567	0.17811502	0.0	13	8	2	false	1100111011	8.0	6	0	false	0	143432
38042	5.5	0.00616009	0.18181818	0.0	12	8	3	false	1100101111	8.0	5	0	false	0	247888
38043	6.02690583	0.00457808	0.16592262	0.0	14	8	2	false	1100101011	8.0	6	0	false	0	68819
38044	5.23580786	0.00152211	0.19099249	0.0	13	8	2	false	1010101011	8.0	6	0	false	0	4718
38045	4.70954357	7.4407E-4	0.2123348	0.0	10	8	1	false	1001101011	8.0	7	0	false	0	1067
38046	6.07174888	0.0030387	0.16469719	0.0	14	8	2	false	1000111011	8.0	6	0	false	0	42465
38047	3.3362069	4.4076E-4	0.2997416	0.0	6	8	1	false	1000101111	8.0	7	0	false	0	672
38048	3.93522267	0.0	0.25411523	0.0	7	8	0	false	1000101011	8.0	8	0	false	0	0
38049	4.5	0.00157341	0.22222222	0.0	10	8	3	false	0010101011	8.0	5	0	false	0	4902
38050	4.0862069	0.00672548	0.24472574	0.0	10	8	2	false	0001101011	8.0	6	0	false	0	33242
38051	3.76699029	0.00150769	0.26546392	0.0	8	8	2	false	0000111011	8.0	6	0	false	0	5676
38052	2.91525424	0.00108113	0.34302326	0.0	5	8	2	false	0000101111	8.0	6	0	false	0	2479
38053	3.52755906	0.00102874	0.28348214	0.0	7	8	1	false	0000101011	8.0	7	0	false	0	3893
38054	4.94736842	0.00578278	0.20212766	0.0	9	8	4	false	0110011111	8.0	4	0	false	0	32117
38055	5.76315789	0.00309307	0.17351598	0.0	10	8	6	false	0101110111	8.0	2	0	false	0	22487
38056	9.12037037	0.00846963	0.10964467	0.0	17	8	6	false	1101110111	8.0	2	0	false	0	209673
38057	5.52777778	0.01198204	0.18090452	0.0	11	8	4	false	1110011111	8.0	4	0	false	0	140157
38058	4.84304933	0.0284044	0.20648148	0.0	10	8	2	false	1111101011	8.0	6	0	false	0	267461
38059	8.33333333	0.01188008	0.12	0.0	16	8	6	false	1001110111	8.0	2	0	false	0	173564
38060	4.21757322	0.00395337	0.23710317	0.0	8	8	1	false	0111101011	8.0	7	0	false	0	12900
38061	5.14285714	0.00715409	0.19444444	0.0	9	8	6	false	0001110111	8.0	2	0	false	0	45003
38062	8.92592593	0.00923577	0.1120332	0.0	16	8	6	false	1010011111	8.0	2	0	false	0	81387
38063	3.45454545	0.00449659	0.28947368	0.0	7	8	6	false	0010011111	8.0	2	0	false	0	19800
38064	4.48192771	0.01104205	0.22311828	0.0	9	8	4	false	0100011111	8.0	4	0	false	0	85857
38065	5.37037037	0.0209609	0.1862069	0.0	10	8	4	false	1100011111	8.0	4	0	false	0	362854
38066	6.29473684	0.0059696	0.15886288	0.0	11	8	5	false	0110110111	8.0	3	0	false	0	35930
38067	4.71969697	0.01001459	0.21187801	0.0	11	8	3	false	0101101011	8.0	5	0	false	0	55180
38068	7.06481481	0.01170411	0.14154653	0.0	15	8	5	false	1110110111	8.0	3	0	false	0	369100
38069	7.86547085	0.02575636	0.12713797	0.0	15	8	4	false	1101101011	8.0	4	0	false	0	287305
38070	5.62037037	0.01678286	0.17792422	0.0	11	8	4	false	1000011111	8.0	4	0	false	0	372973
38071	4.25531915	0.00679927	0.235	0.0	9	8	4	false	0000011111	8.0	4	0	false	0	53616
38072	4.36363636	0.00290451	0.22916667	0.0	7	8	7	false	0010110111	8.0	1	0	false	0	6071
38073	11.35185185	0.003579	0.08809135	0.0	20	8	7	false	1010110111	8.0	1	0	false	0	7352
38074	5.90361446	0.00738801	0.16938776	0.0	10	8	5	false	0100110111	8.0	3	0	false	0	42695
38075	7.07407407	0.01465398	0.14136126	0.0	14	8	5	false	1100110111	8.0	3	0	false	0	438267
38076	5.10638298	0.00646552	0.19583333	0.0	9	8	5	false	0000110111	8.0	3	0	false	0	27275
38077	7.37962963	0.00913475	0.13550816	0.0	13	8	5	false	1000110111	8.0	3	0	false	0	125164
38078	4.24561404	0.00235395	0.23553719	0.0	7	8	3	false	0111001111	8.0	5	0	false	0	4968
38079	5.10185185	0.04528943	0.19600726	0.0	10	8	4	false	1111001111	8.0	4	0	false	0	1560280
38080	5.59259259	0.04345551	0.17880795	0.0	11	8	5	false	1011001111	8.0	3	0	false	0	1489589
38081	5.2173913	0.00281848	0.19166667	0.0	9	8	6	false	0011001111	8.0	2	0	false	0	24602
38082	4.22222222	0.00949743	0.23684211	0.0	7	8	5	false	0101001111	8.0	3	0	false	0	102380
38083	8.72222222	0.01635259	0.11464968	0.0	17	8	6	false	1101001111	8.0	2	0	false	0	99159
38084	5.72197309	0.01423896	0.17476489	0.0	13	8	3	false	1111110011	8.0	5	0	false	0	130893
38085	6.84259259	0.01277092	0.14614344	0.0	13	8	4	false	1111100111	8.0	4	0	false	0	459913
38086	5.91666667	0.02365491	0.16901408	0.0	12	8	5	false	1001001111	8.0	3	0	false	0	707702
38087	5.65714286	0.00454084	0.17676768	0.0	10	8	6	false	0001001111	8.0	2	0	false	0	69340
38088	5.67317073	0.00509283	0.17626827	0.0	13	8	3	false	0111110011	8.0	5	0	false	0	60738
38089	6.17	0.00250852	0.16207455	0.0	13	8	3	false	0111100111	8.0	5	0	false	0	17364
38090	6.43946188	0.02930893	0.15529248	0.0	13	8	4	false	1011110011	8.0	4	0	false	0	293666
38091	6.74074074	0.01317182	0.14835165	0.0	12	8	4	false	1011100111	8.0	4	0	false	0	400551
38092	4.37078652	0.00790646	0.22879177	0.0	8	8	4	false	0011110011	8.0	4	0	false	0	31496
38093	4.52173913	0.0048993	0.22115385	0.0	8	8	5	false	0011100111	8.0	3	0	false	0	30086
38094	4.59913793	0.0018554	0.21743205	0.0	11	8	1	false	1011101110	8.0	7	0	false	0	10754
38095	4.9009009	0.00421539	0.20404412	0.0	11	8	2	false	0011101110	8.0	6	0	false	0	22239
38096	5.33333333	0.00381285	0.1875	0.0	10	8	5	false	0111111101	8.0	3	0	false	0	16184
38097	5.38888889	0.01140795	0.18556701	0.0	10	8	5	false	1111111101	8.0	3	0	false	0	85536
38098	5.83157895	0.00310354	0.17148014	0.0	10	8	5	false	0110001111	8.0	3	0	false	0	20333
38099	3.65217391	0.01141625	0.27380952	0.0	6	8	6	false	0011111101	8.0	2	0	false	0	66194
38100	5.46938776	0.00785987	0.18283582	0.0	10	8	5	false	0101110011	8.0	3	0	false	0	37834
38101	5.425	0.00350766	0.1843318	0.0	10	8	5	false	0101100111	8.0	3	0	false	0	34528
38102	6.71296296	0.03442215	0.14896552	0.0	13	8	6	false	1011111101	8.0	2	0	false	0	555051
38103	7.7309417	0.03962915	0.12935035	0.0	15	8	5	false	1101110011	8.0	3	0	false	0	495629
38104	9.96296296	0.00729926	0.10037175	0.0	18	8	6	false	1101100111	8.0	2	0	false	0	157049
38105	7.77777778	0.00922381	0.12857143	0.0	14	8	6	false	1110001111	8.0	2	0	false	0	110943
38106	5.7092511	0.00274069	0.17515432	0.0	13	8	2	false	1011100011	8.0	6	0	false	0	25627
38107	6.88789238	0.03586716	0.14518229	0.0	14	8	4	false	1001110011	8.0	4	0	false	0	441938
38108	6.93518519	0.00973906	0.14419226	0.0	13	8	4	false	1001100111	8.0	4	0	false	0	186791
38109	4.59139785	0.00492166	0.21779859	0.0	9	8	3	false	0011100011	8.0	5	0	false	0	21176
38110	4.7173913	0.0089113	0.21198157	0.0	9	8	4	false	0001110011	8.0	4	0	false	0	42347
38111	4.97142857	0.0076255	0.20114943	0.0	9	8	5	false	0001100111	8.0	3	0	false	0	71565
38112	8.28703704	0.00982612	0.12067039	0.0	15	8	6	false	1010001111	8.0	2	0	false	0	128722
38113	4.90909091	0.0017189	0.2037037	0.0	8	8	7	false	0010001111	8.0	1	0	false	0	6124
38114	4.3287037	0.00235222	0.23101604	0.0	9	8	1	false	0110101110	8.0	7	0	false	0	7254
38115	5.67889908	0.00112591	0.17609047	0.0	13	8	3	false	1111010111	8.0	5	0	false	0	2620
38116	5.50980392	0.00111547	0.18149466	0.0	13	8	3	false	0111010111	8.0	5	0	false	0	3327
38117	5.62053571	0.02366525	0.17791898	0.0	13	8	2	false	1110101110	8.0	6	0	false	0	906949
38118	3.82608696	0.00462484	0.26136364	0.0	7	8	5	false	0011010111	8.0	3	0	false	0	21443
38119	5.0	0.0040452	0.2	0.0	8	8	7	false	0101111101	8.0	1	0	false	0	24326
38120	7.35185185	0.010646	0.13602015	0.0	14	8	5	false	1011010111	8.0	3	0	false	0	222948
38121	7.60185185	0.02186675	0.13154689	0.0	15	8	7	false	1101111101	8.0	1	0	false	0	408851
38122	4.11428571	0.01628522	0.24305556	0.0	7	8	6	false	0001111101	8.0	2	0	false	0	107561
38123	5.20481928	0.00686622	0.19212963	0.0	9	8	5	false	0100001111	8.0	3	0	false	0	68703
38124	6.64814815	0.05136899	0.15041783	0.0	14	8	6	false	1001111101	8.0	2	0	false	0	1150391
38125	7.78703704	0.00973214	0.12841855	0.0	13	8	6	false	1100001111	8.0	2	0	false	0	64251
38126	5.57788945	0.00554145	0.17927928	0.0	12	8	3	false	0110110011	8.0	5	0	false	0	80069
38127	6.27368421	0.00539156	0.15939597	0.0	12	8	4	false	0110100111	8.0	4	0	false	0	38815
38128	5.69268293	0.00302049	0.1756641	0.0	13	8	2	false	0110100011	8.0	6	0	false	0	44625
38129	6.33183857	0.01474356	0.15793201	0.0	16	8	3	false	1110110011	8.0	5	0	false	0	283042
38130	7.68518519	0.0202302	0.13012048	0.0	16	8	5	false	1110100111	8.0	3	0	false	0	798241
38131	5.68518519	0.00922596	0.17589577	0.0	11	8	4	false	1000001111	8.0	4	0	false	0	212744
38132	5.61702128	0.00376564	0.1780303	0.0	10	8	5	false	0000001111	8.0	3	0	false	0	37005
38133	3.97297297	0.00181707	0.25170068	0.0	8	8	1	false	0100101110	8.0	7	0	false	0	8903
38134	6.9058296	0.0144033	0.14480519	0.0	17	8	3	false	1110100011	8.0	5	0	false	0	159507
38135	9.21076233	0.00633266	0.10856865	0.0	21	8	5	false	1010110011	8.0	3	0	false	0	54190
38136	8.34259259	0.01024527	0.11986681	0.0	17	8	5	false	1010100111	8.0	3	0	false	0	322265
38137	4.71428571	0.00244734	0.21212121	0.0	9	8	5	false	0101010111	8.0	3	0	false	0	16099
38138	4.91025641	0.00409263	0.20365535	0.0	9	8	5	false	0010110011	8.0	3	0	false	0	15351
38139	4.18181818	0.00328881	0.23913043	0.0	7	8	6	false	0010100111	8.0	2	0	false	0	7888
38140	7.96296296	0.0034206	0.1255814	0.0	16	8	5	false	1101010111	8.0	3	0	false	0	50121
38141	6.00892857	0.00669389	0.16641902	0.0	13	8	2	false	1100101110	8.0	6	0	false	0	283520
38142	5.93859649	0.00141439	0.16838996	0.0	14	8	2	false	1010101110	8.0	6	0	false	0	5339
38143	4.83050847	7.1611E-4	0.20701754	0.0	12	8	1	false	1001101110	8.0	7	0	false	0	1045
38144	3.89583333	0.0	0.25668449	0.0	7	8	0	false	1000101110	8.0	8	0	false	0	0
38145	6.58095238	0.00127341	0.15195369	0.0	14	8	3	false	0010101110	8.0	5	0	false	0	4000
38146	4.60683761	0.00760384	0.21706865	0.0	12	8	2	false	0001101110	8.0	6	0	false	0	46476
38147	3.4796748	0.00101043	0.28738318	0.0	7	8	1	false	0000101110	8.0	7	0	false	0	3794
38148	4.28571429	0.00771091	0.23333333	0.0	8	8	5	false	0001010111	8.0	3	0	false	0	41439
38149	7.25	0.01637007	0.13793103	0.0	15	8	5	false	1001010111	8.0	3	0	false	0	289257
38150	5.15789474	0.01449774	0.19387755	0.0	9	8	5	false	0110111101	8.0	3	0	false	0	92219
38151	5.82407407	0.03320902	0.17170111	0.0	13	8	5	false	1110111101	8.0	3	0	false	0	503096
38152	4.1637931	0.00437543	0.24016563	0.0	8	8	1	false	0111101110	8.0	7	0	false	0	16074
38153	4.90178571	0.05116722	0.20400729	0.0	10	8	2	false	1111101110	8.0	6	0	false	0	1931313
38154	5.18857143	0.00442177	0.19273128	0.0	11	8	3	false	0100110011	8.0	5	0	false	0	52374
38155	5.90361446	0.00685059	0.16938776	0.0	11	8	4	false	0100100111	8.0	4	0	false	0	51803
38156	5.34078212	0.00228423	0.18723849	0.0	12	8	2	false	0100100011	8.0	6	0	false	0	35199
38157	3.27272727	0.00758484	0.30555556	0.0	5	8	7	false	0010111101	8.0	1	0	false	0	24622
38158	6.30493274	0.01143818	0.15860597	0.0	15	8	3	false	1100110011	8.0	5	0	false	0	305960
38159	7.82407407	0.01474276	0.12781065	0.0	15	8	5	false	1100100111	8.0	3	0	false	0	479473
38160	9.44444444	0.0142833	0.10588235	0.0	18	8	7	false	1010111101	8.0	1	0	false	0	67729
38161	7.04035874	0.00535496	0.14203822	0.0	16	8	3	false	1100100011	8.0	5	0	false	0	156995
38162	6.77777778	0.00212726	0.14754098	0.0	17	8	3	false	1010100011	8.0	5	0	false	0	12641
38163	6.15283843	0.00130388	0.16252661	0.0	14	8	2	false	1001100011	8.0	6	0	false	0	12377
38164	6.69955157	0.00458208	0.14926372	0.0	14	8	3	false	1000110011	8.0	5	0	false	0	96162
38165	6.07407407	0.00767073	0.16463415	0.0	14	8	3	false	1000100111	8.0	5	0	false	0	60720
38166	5.50649351	5.0448E-4	0.18160377	0.0	15	8	1	false	1000100011	8.0	7	0	false	0	739
38167	5.1875	0.00200413	0.19277108	0.0	10	8	4	false	0010100011	8.0	4	0	false	0	7639
38168	4.85714286	0.00701531	0.20588235	0.0	10	8	3	false	0001100011	8.0	5	0	false	0	37251
38169	4.12631579	0.00249859	0.24234694	0.0	8	8	3	false	0000110011	8.0	5	0	false	0	16392
38170	4.93617021	0.00683771	0.20258621	0.0	9	8	4	false	0000100111	8.0	4	0	false	0	39456
38171	4.23300971	0.00135493	0.23623853	0.0	9	8	2	false	0000100011	8.0	6	0	false	0	11063
38172	5.68421053	0.00460325	0.17592593	0.0	12	8	4	false	0110010111	8.0	4	0	false	0	14769
38173	6.38888889	0.00573835	0.15652174	0.0	16	8	4	false	1110010111	8.0	4	0	false	0	42344
38174	5.72222222	0.04113035	0.17475728	0.0	12	8	5	false	1100111101	8.0	3	0	false	0	885046
38175	5.65581395	0.00485654	0.17680921	0.0	14	8	2	false	0111100011	8.0	6	0	false	0	69235
38176	6.22421525	0.02757086	0.16066282	0.0	14	8	3	false	1111100011	8.0	5	0	false	0	269249
38177	9.63888889	0.00696313	0.1037464	0.0	19	8	6	false	1010010111	8.0	2	0	false	0	65557
38178	4.74698795	0.01844837	0.2106599	0.0	8	8	5	false	0100111101	8.0	3	0	false	0	123636
38179	3.45454545	0.00314597	0.28947368	0.0	6	8	6	false	0010010111	8.0	2	0	false	0	6489
38180	5.18045113	0.01207177	0.19303338	0.0	13	8	3	false	0101101110	8.0	5	0	false	0	83764
38181	7.93303571	0.01774506	0.12605515	0.0	15	8	4	false	1101101110	8.0	4	0	false	0	168561
38182	4.08510638	0.01087955	0.24479167	0.0	7	8	5	false	0000111101	8.0	3	0	false	0	63883
38183	5.80555556	0.02451466	0.1722488	0.0	11	8	5	false	1000111101	8.0	3	0	false	0	566530
38184	3.67567568	0.00113715	0.27205882	0.0	7	8	2	false	1111011101	8.0	6	0	false	0	1362
38185	4.56387665	0.0014217	0.21911197	0.0	9	8	1	false	1111011011	8.0	7	0	false	0	2748
38186	3.73109244	0.0013477	0.26801802	0.0	7	8	2	false	0111011101	8.0	6	0	false	0	2254
38187	4.58299595	0.00151236	0.21819788	0.0	9	8	1	false	0111011011	8.0	7	0	false	0	3816
38188	5.3253012	0.00637054	0.18778281	0.0	11	8	4	false	0100010111	8.0	4	0	false	0	29481
38189	6.21296296	0.00968482	0.1609538	0.0	15	8	4	false	1100010111	8.0	4	0	false	0	118180
38190	6.16666667	0.01426136	0.16216216	0.0	14	8	4	false	1000010111	8.0	4	0	false	0	165078
38191	5.81481481	0.05060329	0.17197452	0.0	12	8	5	false	1011011101	8.0	3	0	false	0	1129113
38192	6.22421525	0.02415624	0.16066282	0.0	11	8	3	false	1011011011	8.0	5	0	false	0	241928
38193	3.13043478	0.01179738	0.31944444	0.0	6	8	5	false	0011011101	8.0	3	0	false	0	96877
38194	4.44444444	0.00397403	0.225	0.0	10	8	3	false	0011011011	8.0	5	0	false	0	13961
38195	5.40865385	0.00350147	0.18488889	0.0	11	8	3	false	0111111110	8.0	5	0	false	0	9314
38196	4.25531915	0.00744001	0.235	0.0	8	8	4	false	0000010111	8.0	4	0	false	0	28921
38197	5.5	0.00960525	0.18181818	0.0	11	8	4	false	0101100011	8.0	4	0	false	0	54405
38198	5.37053571	0.01732513	0.18620116	0.0	10	8	3	false	1111111110	8.0	5	0	false	0	478538
38199	8.62780269	0.0313619	0.11590437	0.0	16	8	5	false	1101100011	8.0	3	0	false	0	398889
38200	6.42574257	0.00534615	0.15562404	0.0	14	8	4	false	0011111110	8.0	4	0	false	0	23322
38201	6.63392857	0.01444688	0.15074024	0.0	13	8	4	false	1011111110	8.0	4	0	false	0	208906
38202	3.76271186	0.0079135	0.26576577	0.0	7	8	4	false	0101011101	8.0	4	0	false	0	66392
38203	5.25	0.00776366	0.19047619	0.0	11	8	3	false	0101011011	8.0	5	0	false	0	51321
38204	6.03703704	0.01006236	0.16564417	0.0	14	8	4	false	1101011101	8.0	4	0	false	0	232794
38205	7.11210762	0.00993737	0.1406053	0.0	15	8	3	false	1101011011	8.0	5	0	false	0	79902
38206	3.6	0.01572314	0.27777778	0.0	7	8	5	false	0001011101	8.0	3	0	false	0	138456
38207	4.87179487	0.00329646	0.20526316	0.0	10	8	5	false	0001011011	8.0	3	0	false	0	23753
38208	5.80555556	0.05516717	0.1722488	0.0	13	8	5	false	1001011101	8.0	3	0	false	0	1481368
38209	8.74439462	0.00977001	0.11435897	0.0	18	8	5	false	1001011011	8.0	3	0	false	0	175276
38210	6.52293578	0.00753484	0.1533052	0.0	16	8	5	false	0101111110	8.0	3	0	false	0	42445
38211	7.58035714	0.02699528	0.13191991	0.0	15	8	5	false	1101111110	8.0	3	0	false	0	338776
38212	5.83333333	0.0083916	0.17142857	0.0	15	8	4	false	0001111110	8.0	4	0	false	0	42524
38213	6.75446429	0.02833066	0.14805023	0.0	14	8	4	false	1001111110	8.0	4	0	false	0	453953
38214	4.43137255	0.00223551	0.22566372	0.0	10	8	3	false	0111101101	8.0	5	0	false	0	3556
38215	4.46315789	0.0120712	0.2240566	0.0	8	8	4	false	0110011101	8.0	4	0	false	0	82362
38216	5.82857143	0.0037476	0.17156863	0.0	11	8	3	false	0110011011	8.0	5	0	false	0	37630
38217	5.36111111	0.02088248	0.1865285	0.0	11	8	4	false	1111101101	8.0	4	0	false	0	198482
38218	5.09259259	0.02022791	0.19636364	0.0	12	8	4	false	1110011101	8.0	4	0	false	0	271552
38219	7.35426009	0.00505814	0.13597561	0.0	17	8	3	false	1110011011	8.0	5	0	false	0	75553
38220	4.86363636	0.00248485	0.20560748	0.0	10	8	3	false	1011101101	8.0	5	0	false	0	7164
38221	2.92	0.00352674	0.34246575	0.0	6	8	4	false	0011101101	8.0	4	0	false	0	13235
38222	8.49074074	0.02104097	0.11777535	0.0	17	8	6	false	1010011101	8.0	2	0	false	0	136800
38223	9.25560538	0.01025989	0.10804264	0.0	20	8	4	false	1010011011	8.0	4	0	false	0	136261
38224	5.37313433	0.00501081	0.18611111	0.0	10	8	3	false	0110111110	8.0	5	0	false	0	18988
38225	5.94642857	0.02064515	0.16816817	0.0	13	8	3	false	1110111110	8.0	5	0	false	0	694952
38226	2.72727273	0.00882424	0.36666667	0.0	5	8	6	false	0010011101	8.0	2	0	false	0	37970
38227	5.01694915	0.00524959	0.19932432	0.0	11	8	4	false	0010011011	8.0	4	0	false	0	28976
38228	8.54	0.00214834	0.11709602	0.0	17	8	5	false	0010111110	8.0	3	0	false	0	5391
38229	9.00446429	0.00366466	0.11105602	0.0	18	8	5	false	1010111110	8.0	3	0	false	0	36918
38230	6.53465347	0.00170915	0.1530303	0.0	14	8	4	false	0111000111	8.0	4	0	false	0	8140
38231	7.51851852	0.0089679	0.13300493	0.0	14	8	5	false	1111000111	8.0	3	0	false	0	370205
38232	4.0952381	0.00580926	0.24418605	0.0	8	8	5	false	0101101101	8.0	3	0	false	0	24558
38233	4.91666667	0.03806739	0.20338983	0.0	11	8	4	false	1100011101	8.0	4	0	false	0	751692
38234	7.04932735	0.0097965	0.14185751	0.0	16	8	3	false	1100011011	8.0	5	0	false	0	147483
38235	4.0	0.02240723	0.25	0.0	7	8	4	false	0100011101	8.0	4	0	false	0	177885
38236	5.37106918	0.00751224	0.18618267	0.0	10	8	3	false	0100011011	8.0	5	0	false	0	71430
38237	8.33333333	0.00920749	0.12	0.0	16	8	6	false	1101101101	8.0	2	0	false	0	54321
38238	7.30555556	0.02111603	0.13688213	0.0	13	8	5	false	1011000111	8.0	3	0	false	0	714336
38239	4.86956522	0.00593783	0.20535714	0.0	8	8	6	false	0011000111	8.0	2	0	false	0	44781
38240	6.42857143	0.00886742	0.15555556	0.0	13	8	3	false	1111110110	8.0	5	0	false	0	282642
38241	6.34313725	0.00452208	0.1576507	0.0	13	8	3	false	0111110110	8.0	5	0	false	0	45843
38242	4.07526882	0.00522482	0.24538259	0.0	8	8	3	false	0011101001	8.0	5	0	false	0	12822
38243	3.39473684	0.00583625	0.29457364	0.0	7	8	4	false	0001101101	8.0	4	0	false	0	23126
38244	4.83406114	0.00367123	0.2068654	0.0	9	8	2	false	1011101001	8.0	6	0	false	0	14695
38245	5.02702703	0.00156578	0.19892473	0.0	11	8	3	false	1001101101	8.0	5	0	false	0	4195
38246	3.57446809	0.01210341	0.2797619	0.0	7	8	4	false	0000011101	8.0	4	0	false	0	95019
38247	4.72727273	0.0050638	0.21153846	0.0	10	8	4	false	0000011011	8.0	4	0	false	0	41632
38248	5.01851852	0.03328183	0.19926199	0.0	10	8	4	false	1000011101	8.0	4	0	false	0	767969
38249	8.71748879	0.01038906	0.11471193	0.0	19	8	4	false	1000011011	8.0	4	0	false	0	195810
38250	6.50505051	0.01589387	0.15372671	0.0	13	8	5	false	0011110110	8.0	3	0	false	0	318132
38251	5.92410714	0.01514585	0.16880181	0.0	12	8	3	false	1100111110	8.0	5	0	false	0	481943
38252	7.50446429	0.01670242	0.13325402	0.0	13	8	5	false	1011110110	8.0	3	0	false	0	206806
38253	4.98285714	0.0043549	0.20068807	0.0	9	8	3	false	0100111110	8.0	5	0	false	0	21106
38254	4.27184466	0.00251585	0.23409091	0.0	8	8	3	false	0000111110	8.0	5	0	false	0	8770
38255	6.0625	0.00577038	0.16494845	0.0	12	8	3	false	1000111110	8.0	5	0	false	0	65180
38256	5.70731707	0.00340176	0.17521368	0.0	10	8	6	false	0101000111	8.0	2	0	false	0	35286
38257	10.87962963	0.0039067	0.09191489	0.0	19	8	7	false	1101000111	8.0	1	0	false	0	47038
38258	7.42592593	0.01969008	0.13466334	0.0	14	8	5	false	1001000111	8.0	3	0	false	0	457264
38259	5.31428571	0.00995624	0.18817204	0.0	9	8	6	false	0001000111	8.0	2	0	false	0	92291
38260	6.98095238	0.00575875	0.14324693	0.0	15	8	5	false	0101110110	8.0	3	0	false	0	99671
38261	8.59375	0.01450048	0.11636364	0.0	15	8	5	false	1101110110	8.0	3	0	false	0	424242
38262	4.43877551	0.00289528	0.22528736	0.0	9	8	3	false	0110101101	8.0	5	0	false	0	7855
38263	4.97073171	0.00308348	0.20117763	0.0	10	8	2	false	0110101001	8.0	6	0	false	0	11673
38264	5.94444444	0.01414639	0.1682243	0.0	14	8	4	false	1110101101	8.0	4	0	false	0	123820
38265	6.3030303	0.01815952	0.15865385	0.0	14	8	5	false	0001110110	8.0	3	0	false	0	364442
38266	7.77678571	0.02097515	0.12858783	0.0	14	8	5	false	1001110110	8.0	3	0	false	0	412867
38267	6.49327354	0.01204182	0.15400552	0.0	15	8	3	false	1110101001	8.0	5	0	false	0	75015
38268	6.5412844	0.00189519	0.15287518	0.0	15	8	4	false	1010101101	8.0	4	0	false	0	5479
38269	2.5	0.00116988	0.4	0.0	5	8	5	false	0010101101	8.0	3	0	false	0	2274
38270	6.23809524	0.00295078	0.16030534	0.0	14	8	4	false	0111111001	8.0	4	0	false	0	24349
38271	5.82474227	0.00436213	0.17168142	0.0	11	8	4	false	0111110101	8.0	4	0	false	0	25148
38272	6.32286996	0.00940603	0.15815603	0.0	12	8	4	false	1111111001	8.0	4	0	false	0	64133
38273	5.91666667	0.01039276	0.16901408	0.0	11	8	4	false	1111110101	8.0	4	0	false	0	105099
38274	6.69473684	0.00582622	0.14937107	0.0	13	8	5	false	0110000111	8.0	3	0	false	0	29785
38275	4.58441558	0.01084513	0.21813031	0.0	9	8	5	false	0011111001	8.0	3	0	false	0	47953
38276	4.17391304	0.00869531	0.23958333	0.0	7	8	6	false	0011110101	8.0	2	0	false	0	40973
38277	6.42152466	0.05128063	0.15572626	0.0	12	8	5	false	1011111001	8.0	3	0	false	0	525736
38278	7.61111111	0.01785595	0.13138686	0.0	14	8	6	false	1011110101	8.0	2	0	false	0	197416
38279	8.47222222	0.01564186	0.11803279	0.0	17	8	6	false	1110000111	8.0	2	0	false	0	475712
38280	4.05882353	0.00256186	0.24637681	0.0	8	8	3	false	0100101101	8.0	5	0	false	0	8830
38281	4.58100559	0.00259174	0.21829268	0.0	9	8	2	false	0100101001	8.0	6	0	false	0	15307
38282	6.10185185	0.0052454	0.16388467	0.0	13	8	4	false	1100101101	8.0	4	0	false	0	52048
38283	9.05555556	0.01596197	0.11042945	0.0	18	8	6	false	1010000111	8.0	2	0	false	0	410988
38284	4.54545455	0.00420686	0.22	0.0	7	8	7	false	0010000111	8.0	1	0	false	0	12335
38285	6.25252525	0.01040143	0.15993538	0.0	12	8	4	false	0110110110	8.0	4	0	false	0	92598
38286	7.03125	0.01834544	0.14222222	0.0	16	8	4	false	1110110110	8.0	4	0	false	0	981302
38287	6.66367713	0.0049794	0.15006729	0.0	14	8	3	false	1100101001	8.0	5	0	false	0	64120
38288	6.14159292	0.00255849	0.16282421	0.0	16	8	3	false	1010101001	8.0	5	0	false	0	7901
38289	5.29741379	0.00168958	0.18877136	0.0	10	8	2	false	1001101001	8.0	6	0	false	0	4482
38290	4.17857143	9.0663E-4	0.23931624	0.0	10	8	2	false	1000101101	8.0	6	0	false	0	1602
38291	4.77446809	6.0916E-4	0.20944742	0.0	11	8	1	false	1000101001	8.0	7	0	false	0	858
38292	4.6875	0.00244896	0.21333333	0.0	9	8	4	false	0010101001	8.0	4	0	false	0	5985
38293	4.36734694	0.0064059	0.22897196	0.0	9	8	3	false	0001101001	8.0	5	0	false	0	19804
38294	3.37254902	0.00152354	0.29651163	0.0	7	8	3	false	0000101101	8.0	5	0	false	0	4286
38295	3.76699029	0.00150769	0.26546392	0.0	8	8	2	false	0000101001	8.0	6	0	false	0	5676
38296	8.16161616	0.01410063	0.12252475	0.0	16	8	6	false	0010110110	8.0	2	0	false	0	247479
38297	9.41071429	0.0126164	0.10626186	0.0	17	8	6	false	1010110110	8.0	2	0	false	0	189844
38298	5.8375	0.00383726	0.17130621	0.0	11	8	6	false	0101111001	8.0	2	0	false	0	16878
38299	5.37837838	0.00431665	0.18592965	0.0	9	8	6	false	0101110101	8.0	2	0	false	0	33137
38300	7.87443946	0.02709872	0.12699317	0.0	14	8	6	false	1101111001	8.0	2	0	false	0	305349
38301	8.37037037	0.01638533	0.11946903	0.0	16	8	6	false	1101110101	8.0	2	0	false	0	459913
38302	5.0	0.00260423	0.2	0.0	11	8	2	false	0111101001	8.0	6	0	false	0	6634
38303	3.98275862	0.00153428	0.25108225	0.0	8	8	2	false	0111001101	8.0	6	0	false	0	3007
38304	4.88888889	0.00259583	0.20454545	0.0	9	8	2	false	0111001011	8.0	6	0	false	0	7674
38305	4.58299595	0.00151236	0.21819788	0.0	9	8	1	false	0111001001	8.0	7	0	false	0	3816
38306	4.96153846	0.00886193	0.20155039	0.0	10	8	5	false	0001111001	8.0	3	0	false	0	46725
38307	4.62857143	0.01278225	0.21604938	0.0	8	8	6	false	0001110101	8.0	2	0	false	0	81383
38308	6.3373494	0.00780515	0.15779468	0.0	12	8	5	false	0100000111	8.0	3	0	false	0	55591
38309	5.89237668	0.01784834	0.16971081	0.0	12	8	3	false	1111101001	8.0	5	0	false	0	99280
38310	4.90740741	0.03231035	0.20377358	0.0	10	8	3	false	1111001101	8.0	5	0	false	0	645137
38311	5.59641256	0.03072668	0.1786859	0.0	11	8	3	false	1111001011	8.0	5	0	false	0	315357
38312	6.92376682	0.0437457	0.14443005	0.0	13	8	5	false	1001111001	8.0	3	0	false	0	545665
38313	7.49074074	0.02601375	0.13349815	0.0	15	8	6	false	1001110101	8.0	2	0	false	0	563359
38314	8.68518519	0.01071773	0.11513859	0.0	16	8	6	false	1100000111	8.0	2	0	false	0	222720
38315	5.27659574	0.00968598	0.18951613	0.0	9	8	5	false	0000000111	8.0	3	0	false	0	58293
38316	5.02830189	0.00458928	0.1988743	0.0	11	8	2	false	0111111010	8.0	6	0	false	0	13085
38317	5.84393064	0.01205235	0.17111771	0.0	11	8	4	false	0100110110	8.0	4	0	false	0	95203
38318	5.34529148	0.02579804	0.18708054	0.0	11	8	2	false	1111001001	8.0	6	0	false	0	200935
38319	5.17592593	0.05471936	0.19320215	0.0	11	8	4	false	1011001101	8.0	4	0	false	0	1292523
38320	5.88340807	0.02714707	0.16996951	0.0	11	8	3	false	1011001011	8.0	5	0	false	0	289262
38321	5.20179372	0.04098915	0.19224138	0.0	10	8	2	false	1011001001	8.0	6	0	false	0	381907
38322	3.82608696	0.00626323	0.26136364	0.0	8	8	5	false	0011001101	8.0	3	0	false	0	53454
38323	5.89090909	0.00177007	0.16975309	0.0	11	8	4	false	0011001011	8.0	4	0	false	0	6809
38324	4.44444444	0.00397403	0.225	0.0	10	8	3	false	0011001001	8.0	5	0	false	0	13961
38325	6.49074074	0.0158775	0.15406562	0.0	15	8	4	false	1000000111	8.0	4	0	false	0	196898
38326	4.97321429	0.02015664	0.2010772	0.0	10	8	2	false	1111111010	8.0	6	0	false	0	540064
38327	7.04464286	0.02217916	0.14195184	0.0	15	8	4	false	1100110110	8.0	4	0	false	0	825562
38328	5.87053571	0.02470094	0.17034221	0.0	11	8	3	false	1011111010	8.0	5	0	false	0	161822
38329	4.50485437	0.01037331	0.22198276	0.0	9	8	3	false	0011111010	8.0	5	0	false	0	28130
38330	5.09090909	0.01856453	0.19642857	0.0	10	8	4	false	0000110110	8.0	4	0	false	0	319506
38331	7.37053571	0.01600255	0.13567535	0.0	14	8	4	false	1000110110	8.0	4	0	false	0	281924
38332	5.95721925	0.00802294	0.16786355	0.0	13	8	4	false	0110111001	8.0	4	0	false	0	96437
38333	5.72631579	0.01185594	0.17463235	0.0	10	8	5	false	0110110101	8.0	3	0	false	0	81949
38334	5.08490566	0.00650743	0.19666048	0.0	10	8	4	false	0101101001	8.0	4	0	false	0	22730
38335	3.96428571	0.00843795	0.25225225	0.0	8	8	4	false	0101001101	8.0	4	0	false	0	68169
38336	5.47058824	0.01018397	0.1827957	0.0	12	8	4	false	0101001011	8.0	4	0	false	0	72710
38337	6.96860987	0.01549622	0.14350064	0.0	15	8	4	false	1110111001	8.0	4	0	false	0	254993
38338	6.44444444	0.02854752	0.15517241	0.0	14	8	5	false	1110110101	8.0	3	0	false	0	641687
38339	8.34977578	0.01447898	0.11976369	0.0	15	8	5	false	1101101001	8.0	3	0	false	0	132701
38340	8.67592593	0.01235579	0.11526147	0.0	17	8	5	false	1101001101	8.0	3	0	false	0	60886
38341	8.76233184	0.02671254	0.11412487	0.0	16	8	5	false	1101001011	8.0	3	0	false	0	268117
38342	6.14903846	0.00338996	0.16262705	0.0	14	8	2	false	0111100110	8.0	6	0	false	0	57123
38343	6.87946429	0.01608702	0.14536016	0.0	14	8	3	false	1111100110	8.0	5	0	false	0	1225449
38344	5.35185185	0.03503439	0.18685121	0.0	12	8	4	false	1001001101	8.0	4	0	false	0	841057
38345	8.15246637	0.01479075	0.12266227	0.0	17	8	5	false	1001001011	8.0	3	0	false	0	192738
38346	5.44247788	0.01060708	0.18373984	0.0	11	8	4	false	0101111010	8.0	4	0	false	0	43893
38347	5.17391304	0.0061404	0.19327731	0.0	10	8	6	false	0010111001	8.0	2	0	false	0	31927
38348	3.81818182	0.00607707	0.26190476	0.0	6	8	7	false	0010110101	8.0	1	0	false	0	14085
38349	6.78787879	0.01002731	0.14732143	0.0	14	8	4	false	0011100110	8.0	4	0	false	0	182360
38350	6.5625	0.02106261	0.15238095	0.0	13	8	3	false	1011100110	8.0	5	0	false	0	1211682
38351	4.28571429	0.00869138	0.23333333	0.0	9	8	5	false	0001001101	8.0	3	0	false	0	80125
38352	6.35135135	0.00189959	0.15744681	0.0	11	8	6	false	0001001011	8.0	2	0	false	0	19059
38353	9.26457399	0.01072925	0.10793804	0.0	20	8	6	false	1010111001	8.0	2	0	false	0	108381
38354	10.39814815	0.00869465	0.09617097	0.0	19	8	7	false	1010110101	8.0	1	0	false	0	24997
38355	7.05803571	0.04414974	0.14168248	0.0	13	8	4	false	1101111010	8.0	4	0	false	0	469762
38356	5.01754386	0.00315477	0.1993007	0.0	10	8	2	false	1011101010	8.0	6	0	false	0	11327
38357	6.26785714	0.03406129	0.15954416	0.0	12	8	3	false	1001111010	8.0	5	0	false	0	334536
38358	4.82242991	0.00754173	0.20736434	0.0	10	8	3	false	0011101010	8.0	5	0	false	0	37244
38359	4.73333333	0.01147118	0.21126761	0.0	10	8	3	false	0001111010	8.0	5	0	false	0	42415
38360	4.9030837	0.00286741	0.20395328	0.0	9	8	2	false	1111011110	8.0	6	0	false	0	4837
38361	4.87447699	0.00313758	0.20515021	0.0	9	8	2	false	0111011110	8.0	6	0	false	0	6545
38362	5.50898204	0.00723753	0.18152174	0.0	12	8	4	false	0100111001	8.0	4	0	false	0	92219
38363	5.3253012	0.01492267	0.18778281	0.0	9	8	5	false	0100110101	8.0	3	0	false	0	94905
38364	6.7264574	0.01464985	0.14866667	0.0	14	8	4	false	1100111001	8.0	4	0	false	0	331138
38365	6.39814815	0.03515474	0.15629522	0.0	13	8	5	false	1100110101	8.0	3	0	false	0	920981
38366	6.81651376	0.00452069	0.14670256	0.0	16	8	4	false	0101100110	8.0	4	0	false	0	118807
38367	7.23232323	0.01734829	0.13826816	0.0	15	8	5	false	0011011110	8.0	3	0	false	0	268220
38368	9.46428571	0.00985192	0.10566038	0.0	16	8	5	false	1101100110	8.0	3	0	false	0	273944
38369	6.41517857	0.05311588	0.15588031	0.0	13	8	5	false	1011011110	8.0	3	0	false	0	2160548
38370	4.35443038	0.00321453	0.22965116	0.0	8	8	4	false	0000111001	8.0	4	0	false	0	27358
38371	4.59574468	0.01130702	0.21759259	0.0	8	8	5	false	0000110101	8.0	3	0	false	0	53318
38372	4.94736842	0.00578278	0.20212766	0.0	9	8	4	false	0110001101	8.0	4	0	false	0	32117
38373	6.63313609	0.00217458	0.15075825	0.0	12	8	4	false	0110001011	8.0	4	0	false	0	18515
38374	5.82857143	0.0037476	0.17156863	0.0	11	8	3	false	0110001001	8.0	5	0	false	0	37630
38375	6.95067265	0.00721954	0.14387097	0.0	13	8	4	false	1000111001	8.0	4	0	false	0	165543
38376	6.59259259	0.01801722	0.15168539	0.0	12	8	5	false	1000110101	8.0	3	0	false	0	358739
38377	7.21296296	0.01453179	0.13863928	0.0	15	8	5	false	1110001101	8.0	3	0	false	0	111024
38378	9.44394619	0.00371964	0.10588794	0.0	18	8	5	false	1110001011	8.0	3	0	false	0	53499
38379	6.3030303	0.01126532	0.15865385	0.0	15	8	4	false	0001100110	8.0	4	0	false	0	276374
38380	6.83482143	0.01585805	0.1463096	0.0	14	8	3	false	1001100110	8.0	5	0	false	0	530513
38381	3.45454545	0.00449659	0.28947368	0.0	7	8	6	false	0010001101	8.0	2	0	false	0	19800
38382	6.50943396	0.00268573	0.15362319	0.0	12	8	5	false	0010001011	8.0	3	0	false	0	17530
38383	5.01694915	0.00524959	0.19932432	0.0	11	8	4	false	0010001001	8.0	4	0	false	0	28976
38384	8.9058296	0.00535641	0.112286	0.0	17	8	4	false	1110001001	8.0	4	0	false	0	51720
38385	7.66666667	0.01993378	0.13043478	0.0	16	8	5	false	1010001101	8.0	3	0	false	0	163518
38386	9.02242152	0.00710692	0.11083499	0.0	19	8	4	false	1010001011	8.0	4	0	false	0	111274
38387	8.03587444	0.01280247	0.12444196	0.0	18	8	3	false	1010001001	8.0	5	0	false	0	145382
38388	4.99509804	0.00536729	0.20019627	0.0	10	8	2	false	0110111010	8.0	6	0	false	0	27049
38389	5.07142857	0.00377484	0.1971831	0.0	11	8	2	false	0110101010	8.0	6	0	false	0	15778
38390	5.54910714	0.02016448	0.18020917	0.0	12	8	2	false	1110111010	8.0	6	0	false	0	773046
38391	4.31877729	9.5582E-4	0.23154702	0.0	9	8	1	false	1111011001	8.0	7	0	false	0	866
38392	3.39495798	4.5365E-4	0.29455446	0.0	6	8	1	false	1111010101	8.0	7	0	false	0	530
38393	6.03111111	0.00110171	0.16580693	0.0	14	8	2	false	1111010011	8.0	6	0	false	0	1978
38394	3.86147186	0.0	0.25896861	0.0	7	8	0	false	1111010001	8.0	8	0	false	0	0
38395	4.39920949	0.0011993	0.22731357	0.0	9	8	1	false	0111011001	8.0	7	0	false	0	1357
38396	3.52755906	4.8069E-4	0.28348214	0.0	7	8	1	false	0111010101	8.0	7	0	false	0	777
38397	5.82648402	0.00113281	0.17163009	0.0	14	8	2	false	0111010011	8.0	6	0	false	0	2796
38398	4.01568627	0.0	0.24902344	0.0	8	8	0	false	0111010001	8.0	8	0	false	0	0
38399	6.08928571	0.02310865	0.16422287	0.0	13	8	3	false	1110101010	8.0	5	0	false	0	980730
38400	7.36607143	0.00685115	0.13575758	0.0	14	8	4	false	1010111010	8.0	4	0	false	0	34194
38401	5.98571429	0.01281681	0.16706444	0.0	15	8	4	false	0101011110	8.0	4	0	false	0	149095
38402	5.55445545	0.00656705	0.18003565	0.0	12	8	4	false	0010111010	8.0	4	0	false	0	12400
38403	6.95982143	0.01673639	0.14368185	0.0	15	8	4	false	1101011110	8.0	4	0	false	0	502423
38404	3.84	0.00980184	0.26041667	0.0	8	8	3	false	0011011001	8.0	5	0	false	0	45288
38405	2.28	0.00214901	0.43859649	0.0	4	8	3	false	0011010101	8.0	5	0	false	0	9492
38406	4.72727273	0.00348738	0.21153846	0.0	9	8	4	false	0011010011	8.0	4	0	false	0	5819
38407	3.27710843	0.00901208	0.30514706	0.0	6	8	2	false	0011010001	8.0	6	0	false	0	34956
38408	5.52466368	0.05644192	0.18100649	0.0	11	8	3	false	1011011001	8.0	5	0	false	0	588114
38409	5.83636364	0.00565458	0.17133956	0.0	13	8	3	false	1011010101	8.0	5	0	false	0	83393
38410	7.5426009	0.02090697	0.13258026	0.0	16	8	4	false	1011010011	8.0	4	0	false	0	186754
38411	5.16591928	0.03933971	0.19357639	0.0	11	8	2	false	1011010001	8.0	6	0	false	0	341633
38412	6.58585859	0.03026359	0.15184049	0.0	16	8	5	false	0001011110	8.0	3	0	false	0	534927
38413	6.63392857	0.06735611	0.15074024	0.0	14	8	5	false	1001011110	8.0	3	0	false	0	2455860
38414	5.25	0.00776366	0.19047619	0.0	11	8	3	false	0101001001	8.0	5	0	false	0	51321
38415	4.48192771	0.01104205	0.22311828	0.0	9	8	4	false	0100001101	8.0	4	0	false	0	85857
38416	5.97419355	0.00599612	0.16738661	0.0	11	8	4	false	0100001011	8.0	4	0	false	0	52104
38417	5.37106918	0.00751224	0.18618267	0.0	10	8	3	false	0100001001	8.0	5	0	false	0	71430
38418	8.65470852	0.01718582	0.11554404	0.0	16	8	4	false	1101001001	8.0	4	0	false	0	114513
38419	7.46296296	0.01279533	0.13399504	0.0	14	8	5	false	1100001101	8.0	3	0	false	0	74637
38420	9.02242152	0.01039933	0.11083499	0.0	17	8	5	false	1100001011	8.0	3	0	false	0	124436
38421	6.21717172	0.00791527	0.16084484	0.0	13	8	3	false	0110100110	8.0	5	0	false	0	109127
38422	7.63392857	0.0286331	0.13099415	0.0	17	8	4	false	1110100110	8.0	4	0	false	0	2413426
38423	4.87179487	0.00329646	0.20526316	0.0	10	8	5	false	0001001001	8.0	3	0	false	0	23753
38424	4.25531915	0.00679927	0.235	0.0	9	8	4	false	0000001101	8.0	4	0	false	0	53616
38425	6.19607843	0.00322975	0.16139241	0.0	11	8	5	false	0000001011	8.0	3	0	false	0	30834
38426	4.72727273	0.0050638	0.21153846	0.0	10	8	4	false	0000001001	8.0	4	0	false	0	41632
38427	8.69058296	0.00965284	0.11506708	0.0	16	8	4	false	1100001001	8.0	4	0	false	0	82135
38428	7.73991031	0.01709028	0.12920046	0.0	16	8	4	false	1001001001	8.0	4	0	false	0	185858
38429	4.75	0.0183169	0.21052632	0.0	9	8	3	false	1000001101	8.0	5	0	false	0	305352
38430	8.37668161	0.0109373	0.11937901	0.0	18	8	4	false	1000001011	8.0	4	0	false	0	184620
38431	7.60538117	0.01383928	0.13148585	0.0	17	8	3	false	1000001001	8.0	5	0	false	0	189010
38432	4.60451977	0.00436266	0.21717791	0.0	9	8	2	false	0100111010	8.0	6	0	false	0	23617
38433	4.71270718	0.00276699	0.21219226	0.0	10	8	2	false	0100101010	8.0	6	0	false	0	15581
38434	8.76767677	0.0088202	0.1140553	0.0	17	8	5	false	0010100110	8.0	3	0	false	0	168875
38435	5.65178571	0.01434156	0.17693523	0.0	12	8	2	false	1100111010	8.0	6	0	false	0	566316
38436	8.09375	0.01890483	0.12355212	0.0	18	8	4	false	1010100110	8.0	4	0	false	0	1076361
38437	5.2260274	0.00676768	0.19134993	0.0	12	8	3	false	0101011001	8.0	5	0	false	0	57950
38438	3.55555556	0.00162814	0.28125	0.0	7	8	3	false	0101010101	8.0	5	0	false	0	9760
38439	5.80357143	0.00492601	0.17230769	0.0	11	8	4	false	0101010011	8.0	4	0	false	0	16316
38440	6.93273543	0.00757447	0.14424321	0.0	14	8	3	false	1101011001	8.0	5	0	false	0	102379
38441	5.91964286	0.00223412	0.16892911	0.0	15	8	3	false	1101010101	8.0	5	0	false	0	32976
38442	8.1793722	0.00776509	0.12225877	0.0	15	8	4	false	1101010011	8.0	4	0	false	0	50871
38443	6.37053571	0.00796704	0.15697267	0.0	13	8	3	false	1100101010	8.0	5	0	false	0	371085
38444	6.0619469	0.00252306	0.1649635	0.0	13	8	3	false	1010101010	8.0	5	0	false	0	11759
38445	5.40869565	0.00145211	0.18488746	0.0	11	8	2	false	1001101010	8.0	6	0	false	0	4365
38446	5.97767857	0.00435769	0.16728902	0.0	13	8	2	false	1000111010	8.0	6	0	false	0	43169
38447	4.65517241	6.0388E-4	0.21481481	0.0	11	8	1	false	1000101010	8.0	7	0	false	0	856
38448	6.09708738	0.00357217	0.16401274	0.0	13	8	4	false	0010101010	8.0	4	0	false	0	7358
38449	4.9009009	0.01105861	0.20404412	0.0	11	8	3	false	0001101010	8.0	5	0	false	0	67932
38450	4.0	0.00243985	0.25	0.0	9	8	2	false	0000111010	8.0	6	0	false	0	8877
38451	4.06956522	0.00162554	0.2457265	0.0	9	8	2	false	0000101010	8.0	6	0	false	0	6175
38452	4.11904762	0.00605889	0.24277457	0.0	8	8	5	false	0001011001	8.0	3	0	false	0	46058
38453	2.76315789	0.00389662	0.36190476	0.0	5	8	3	false	0001010101	8.0	5	0	false	0	18300
38454	5.05405405	0.0035448	0.19786096	0.0	9	8	6	false	0001010011	8.0	2	0	false	0	12487
38455	8.39461883	0.01967937	0.11912393	0.0	17	8	5	false	1001011001	8.0	3	0	false	0	341586
38456	5.64864865	0.00923421	0.17703349	0.0	14	8	3	false	1001010101	8.0	5	0	false	0	142469
38457	9.64125561	0.0093069	0.10372093	0.0	18	8	6	false	1001010011	8.0	2	0	false	0	115614
38458	5.70707071	0.01345153	0.17522124	0.0	10	8	4	false	0110011110	8.0	4	0	false	0	105890
38459	6.23660714	0.02134887	0.16034359	0.0	12	8	4	false	1110011110	8.0	4	0	false	0	437647
38460	4.96396396	0.00646683	0.20145191	0.0	12	8	2	false	0111101010	8.0	6	0	false	0	22949
38461	5.85549133	0.00961954	0.17077986	0.0	12	8	3	false	0100100110	8.0	5	0	false	0	121234
38462	9.43434343	0.01196356	0.10599572	0.0	18	8	6	false	0010011110	8.0	2	0	false	0	127632
38463	5.44196429	0.0462178	0.18375718	0.0	11	8	3	false	1111101010	8.0	5	0	false	0	1622676
38464	7.79017857	0.02025083	0.12836676	0.0	16	8	4	false	1100100110	8.0	4	0	false	0	1315581
38465	8.85714286	0.02161538	0.11290323	0.0	17	8	6	false	1010011110	8.0	2	0	false	0	588397
38466	4.80808081	0.01014377	0.20798319	0.0	9	8	3	false	0000100110	8.0	5	0	false	0	160515
38467	6.02678571	0.01344471	0.16592593	0.0	15	8	2	false	1000100110	8.0	6	0	false	0	216182
38468	5.33695652	0.00838391	0.18737271	0.0	12	8	3	false	0110011001	8.0	5	0	false	0	109683
38469	3.97058824	0.00185561	0.25185185	0.0	9	8	2	false	0110010101	8.0	6	0	false	0	11748
38470	6.57961783	0.00307345	0.15198451	0.0	13	8	4	false	0110010011	8.0	4	0	false	0	13418
38471	4.75789474	0.0068279	0.21017699	0.0	10	8	2	false	0110010001	8.0	6	0	false	0	75827
38472	5.455	0.00603472	0.18331806	0.0	12	8	3	false	0111110001	8.0	5	0	false	0	75326
38473	6.31632653	0.00265337	0.15831987	0.0	12	8	4	false	0111100101	8.0	4	0	false	0	14895
38474	6.69058296	0.01049224	0.14946381	0.0	16	8	3	false	1110011001	8.0	5	0	false	0	182998
38475	4.62608696	0.00282019	0.21616541	0.0	13	8	2	false	1110010101	8.0	6	0	false	0	35980
38476	8.47533632	0.00511543	0.11798942	0.0	17	8	4	false	1110010011	8.0	4	0	false	0	39388
38477	5.95515695	0.01322018	0.16792169	0.0	15	8	2	false	1110010001	8.0	6	0	false	0	209462
38478	5.53363229	0.0189507	0.18071313	0.0	12	8	3	false	1111110001	8.0	5	0	false	0	168405
38479	6.66666667	0.01259913	0.15	0.0	12	8	5	false	1111100101	8.0	3	0	false	0	226776
38480	5.25433526	0.02064674	0.19031903	0.0	9	8	4	false	0100011110	8.0	4	0	false	0	244403
38481	6.05357143	0.03229794	0.16519174	0.0	11	8	4	false	1100011110	8.0	4	0	false	0	913908
38482	8.33183857	0.02244583	0.12002153	0.0	19	8	4	false	1010011001	8.0	4	0	false	0	278441
38483	8.40366972	0.00293454	0.11899563	0.0	18	8	4	false	1010010101	8.0	4	0	false	0	21248
38484	10.22421525	0.01003014	0.09780702	0.0	20	8	5	false	1010010011	8.0	3	0	false	0	90307
38485	7.85650224	0.0203205	0.12728311	0.0	19	8	3	false	1010010001	8.0	5	0	false	0	183688
38486	5.16666667	0.00284957	0.19354839	0.0	11	8	2	false	1011101100	8.0	6	0	false	0	13912
38487	5.39805825	0.00450471	0.1852518	0.0	12	8	3	false	0011101100	8.0	5	0	false	0	13800
38488	4.32352941	0.01099593	0.23129252	0.0	9	8	4	false	0010011001	8.0	4	0	false	0	71916
38489	1.83333333	0.00128809	0.54545455	0.0	3	8	4	false	0010010101	8.0	4	0	false	0	3774
38490	5.30188679	0.0049041	0.1886121	0.0	10	8	5	false	0010010011	8.0	3	0	false	0	12050
38491	3.70666667	0.01082059	0.26978417	0.0	7	8	3	false	0010010001	8.0	5	0	false	0	49489
38492	5.52845528	0.01603571	0.18088235	0.0	12	8	4	false	0101101010	8.0	4	0	false	0	96060
38493	6.02690583	0.05604727	0.16592262	0.0	12	8	4	false	1011110001	8.0	4	0	false	0	538042
38494	6.65740741	0.01140831	0.15020862	0.0	11	8	5	false	1011100101	8.0	3	0	false	0	168780
38495	4.04597701	0.01621917	0.24715909	0.0	7	8	4	false	0011110001	8.0	4	0	false	0	79546
38496	4.69565217	0.00454839	0.21296296	0.0	8	8	6	false	0011100101	8.0	2	0	false	0	19547
38497	4.92929293	0.0373773	0.20286885	0.0	9	8	4	false	0000011110	8.0	4	0	false	0	821620
38498	6.12053571	0.04648422	0.16338439	0.0	11	8	4	false	1000011110	8.0	4	0	false	0	1056829
38499	7.95535714	0.03905445	0.12570146	0.0	14	8	5	false	1101101010	8.0	3	0	false	0	427380
38500	4.84459459	0.00321202	0.20641562	0.0	10	8	2	false	0101010001	8.0	6	0	false	0	20046
38501	5.01212121	0.01346029	0.19951632	0.0	11	8	3	false	0100011001	8.0	5	0	false	0	167671
38502	3.58426966	0.00301325	0.27899687	0.0	8	8	2	false	0100010101	8.0	6	0	false	0	22874
38503	6.11188811	0.00533635	0.16361556	0.0	12	8	4	false	0100010011	8.0	4	0	false	0	23709
38504	4.50295858	0.00953199	0.22207622	0.0	9	8	2	false	0100010001	8.0	6	0	false	0	92549
38505	5.25806452	0.00723115	0.19018405	0.0	9	8	5	false	0101110001	8.0	3	0	false	0	40070
38506	5.76315789	0.00309307	0.17351598	0.0	10	8	6	false	0101100101	8.0	2	0	false	0	22487
38507	6.60986547	0.00499598	0.15128901	0.0	13	8	2	false	1101010001	8.0	6	0	false	0	70894
38508	6.58295964	0.01572307	0.15190736	0.0	15	8	3	false	1100011001	8.0	5	0	false	0	321631
38509	4.48245614	0.00494605	0.22309198	0.0	12	8	2	false	1100010101	8.0	6	0	false	0	89373
38510	8.01793722	0.00873635	0.12472036	0.0	16	8	4	false	1100010011	8.0	4	0	false	0	87348
38511	6.0	0.01602821	0.16666667	0.0	14	8	2	false	1100010001	8.0	6	0	false	0	313185
38512	7.40807175	0.04576595	0.13498789	0.0	14	8	5	false	1101110001	8.0	3	0	false	0	503717
38513	9.30555556	0.00789743	0.10746269	0.0	17	8	7	false	1101100101	8.0	1	0	false	0	160253
38514	5.49777778	0.00575915	0.18189167	0.0	12	8	3	false	1011100001	8.0	5	0	false	0	37262
38515	6.51121076	0.05710182	0.15358127	0.0	13	8	4	false	1001110001	8.0	4	0	false	0	668282
38516	6.92592593	0.00817517	0.14438503	0.0	12	8	5	false	1001100101	8.0	3	0	false	0	79020
38517	4.37078652	0.00790646	0.22879177	0.0	8	8	4	false	0011100001	8.0	4	0	false	0	31496
38518	4.43820225	0.01437861	0.22531646	0.0	8	8	4	false	0001110001	8.0	4	0	false	0	80466
38519	5.14285714	0.00715409	0.19444444	0.0	9	8	6	false	0001100101	8.0	2	0	false	0	45003
38520	3.39130435	0.00609996	0.29487179	0.0	6	8	4	false	0001010001	8.0	4	0	false	0	26963
38521	4.01639344	0.00806553	0.24897959	0.0	8	8	4	false	0000011001	8.0	4	0	false	0	77478
38522	2.74509804	0.00366629	0.36428571	0.0	5	8	2	false	0000010101	8.0	6	0	false	0	16066
38523	4.94117647	0.00571345	0.20238095	0.0	9	8	5	false	0000010011	8.0	3	0	false	0	19659
38524	3.34328358	0.00798875	0.29910714	0.0	6	8	3	false	0000010001	8.0	5	0	false	0	43901
38525	8.19730942	0.01597809	0.12199125	0.0	17	8	4	false	1001010001	8.0	4	0	false	0	188520
38526	8.03587444	0.01717598	0.12444196	0.0	18	8	4	false	1000011001	8.0	4	0	false	0	363817
38527	4.50892857	0.00650732	0.22178218	0.0	11	8	2	false	1000010101	8.0	6	0	false	0	74680
38528	9.56950673	0.0112588	0.10449859	0.0	19	8	5	false	1000010011	8.0	3	0	false	0	116296
38529	7.61434978	0.01492004	0.13133098	0.0	18	8	3	false	1000010001	8.0	5	0	false	0	203858
38530	4.95098039	0.00324104	0.2019802	0.0	10	8	2	false	0110101100	8.0	6	0	false	0	9249
38531	6.40178571	0.01704027	0.15620642	0.0	15	8	3	false	1110101100	8.0	5	0	false	0	237176
38532	5.28571429	0.01222853	0.18918919	0.0	11	8	3	false	0110110001	8.0	5	0	false	0	186642
38533	6.29473684	0.0059696	0.15886288	0.0	11	8	5	false	0110100101	8.0	3	0	false	0	35930
38534	5.57788945	0.00554145	0.17927928	0.0	12	8	3	false	0110100001	8.0	5	0	false	0	80069
38535	6.09865471	0.02850876	0.16397059	0.0	15	8	3	false	1110110001	8.0	5	0	false	0	553316
38536	7.28703704	0.02546371	0.13722999	0.0	15	8	6	false	1110100101	8.0	2	0	false	0	625955
38537	4.57062147	0.00267737	0.21878863	0.0	9	8	2	false	0100101100	8.0	6	0	false	0	10703
38538	6.79820628	0.0199631	0.14709763	0.0	16	8	4	false	1110100001	8.0	4	0	false	0	294997
38539	8.75336323	0.01536076	0.1142418	0.0	20	8	5	false	1010110001	8.0	3	0	false	0	141811
38540	8.01851852	0.00961078	0.12471132	0.0	16	8	6	false	1010100101	8.0	2	0	false	0	187283
38541	4.55844156	0.00984797	0.21937322	0.0	8	8	5	false	0010110001	8.0	3	0	false	0	48670
38542	4.36363636	0.00290451	0.22916667	0.0	7	8	7	false	0010100101	8.0	1	0	false	0	6071
38543	6.55803571	0.00592656	0.15248468	0.0	14	8	3	false	1100101100	8.0	5	0	false	0	93837
38544	6.78761062	0.00215647	0.14732725	0.0	16	8	3	false	1010101100	8.0	5	0	false	0	11488
38545	5.44347826	0.00153423	0.18370607	0.0	12	8	2	false	1001101100	8.0	6	0	false	0	4670
38546	4.68103448	6.1195E-4	0.21362799	0.0	11	8	1	false	1000101100	8.0	7	0	false	0	839
38547	7.0990099	0.00168252	0.14086471	0.0	15	8	4	false	0010101100	8.0	4	0	false	0	3717
38548	5.11428571	0.00716854	0.19553073	0.0	13	8	3	false	0001101100	8.0	5	0	false	0	24827
38549	3.88785047	0.00152434	0.25721154	0.0	8	8	2	false	0000101100	8.0	6	0	false	0	4185
38550	4.94811321	0.00280173	0.20209724	0.0	11	8	2	false	0111101100	8.0	6	0	false	0	7400
38551	4.82627119	0.00396484	0.2071993	0.0	9	8	2	false	0111001110	8.0	6	0	false	0	11835
38552	4.54166667	0.00280111	0.22018349	0.0	9	8	1	false	0111001100	8.0	7	0	false	0	6058
38553	5.84375	0.02798581	0.17112299	0.0	12	8	3	false	1111101100	8.0	5	0	false	0	372570
38554	5.65625	0.06445196	0.17679558	0.0	11	8	3	false	1111001110	8.0	5	0	false	0	2799070
38555	4.87283237	0.01045253	0.20521945	0.0	10	8	3	false	0100110001	8.0	5	0	false	0	134195
38556	5.90361446	0.00738801	0.16938776	0.0	10	8	5	false	0100100101	8.0	3	0	false	0	42695
38557	5.18857143	0.00442177	0.19273128	0.0	11	8	3	false	0100100001	8.0	5	0	false	0	52374
38558	6.00896861	0.02303183	0.16641791	0.0	14	8	3	false	1100110001	8.0	5	0	false	0	590503
38559	7.2962963	0.01950838	0.13705584	0.0	14	8	6	false	1100100101	8.0	2	0	false	0	447061
38560	8.08080808	0.0077598	0.12375	0.0	16	8	5	false	0011001110	8.0	3	0	false	0	157009
38561	5.4375	0.05018703	0.18390805	0.0	11	8	2	false	1111001100	8.0	6	0	false	0	1381976
38562	5.88392857	0.07460769	0.16995448	0.0	12	8	4	false	1011001110	8.0	4	0	false	0	3591061
38563	6.8161435	0.00954738	0.14671053	0.0	15	8	4	false	1100100001	8.0	4	0	false	0	211066
38564	6.6875	0.00449338	0.14953271	0.0	16	8	4	false	1010100001	8.0	4	0	false	0	25940
38565	5.98672566	0.00299647	0.16703622	0.0	13	8	3	false	1001100001	8.0	5	0	false	0	27454
38566	6.367713	0.0095435	0.15704225	0.0	13	8	3	false	1000110001	8.0	5	0	false	0	212497
38567	6.12037037	0.00679839	0.1633888	0.0	13	8	4	false	1000100101	8.0	4	0	false	0	30855
38568	5.45374449	0.0016927	0.18336026	0.0	14	8	2	false	1000100001	8.0	6	0	false	0	14582
38569	4.91025641	0.00409263	0.20365535	0.0	9	8	5	false	0010100001	8.0	3	0	false	0	15351
38570	4.7173913	0.0089113	0.21198157	0.0	9	8	4	false	0001100001	8.0	4	0	false	0	42347
38571	3.86813187	0.00494627	0.25852273	0.0	7	8	3	false	0000110001	8.0	5	0	false	0	39482
38572	5.10638298	0.00646552	0.19583333	0.0	9	8	5	false	0000100101	8.0	3	0	false	0	27275
38573	4.12631579	0.00249859	0.24234694	0.0	8	8	3	false	0000100001	8.0	5	0	false	0	16392
38574	5.67317073	0.00509283	0.17626827	0.0	13	8	3	false	0111100001	8.0	5	0	false	0	60738
38575	5.50980392	0.00111547	0.18149466	0.0	13	8	3	false	0111000101	8.0	5	0	false	0	3327
38576	6.4562212	0.00214778	0.15488936	0.0	15	8	3	false	0111000011	8.0	5	0	false	0	5339
38577	5.82648402	0.00113281	0.17163009	0.0	14	8	2	false	0111000001	8.0	6	0	false	0	2796
38578	6.19730942	0.02604906	0.16136035	0.0	13	8	4	false	1111100001	8.0	4	0	false	0	227153
38579	6.5462963	0.00695055	0.15275813	0.0	13	8	4	false	1111000101	8.0	4	0	false	0	165260
38580	7.10313901	0.02443714	0.14078283	0.0	15	8	4	false	1111000011	8.0	4	0	false	0	207726
38581	5.79646018	0.00807241	0.17251908	0.0	14	8	4	false	0101101100	8.0	4	0	false	0	35474
38582	5.83211679	0.01493087	0.17146433	0.0	14	8	4	false	0101001110	8.0	4	0	false	0	145414
38583	8.41071429	0.01085279	0.11889597	0.0	15	8	5	false	1101101100	8.0	3	0	false	0	104523
38584	8.83035714	0.02141753	0.1132457	0.0	16	8	5	false	1101001110	8.0	3	0	false	0	167276
38585	6.49327354	0.019646	0.15400552	0.0	14	8	3	false	1111000001	8.0	5	0	false	0	143091
38586	6.33333333	0.01710178	0.15789474	0.0	12	8	4	false	1011000101	8.0	4	0	false	0	329670
38587	7.26457399	0.02203692	0.13765432	0.0	15	8	4	false	1011000011	8.0	4	0	false	0	195723
38588	6.43946188	0.02346295	0.15529248	0.0	14	8	3	false	1011000001	8.0	5	0	false	0	168701
38589	6.87128713	0.00712493	0.14553314	0.0	13	8	4	false	0111110010	8.0	4	0	false	0	100539
38590	6.98989899	0.01653252	0.14306358	0.0	15	8	4	false	0011001100	8.0	4	0	false	0	215194
38591	7.43434343	0.00925041	0.13451087	0.0	17	8	5	false	0001001110	8.0	3	0	false	0	186370
38592	3.82608696	0.00462484	0.26136364	0.0	7	8	5	false	0011000101	8.0	3	0	false	0	21443
38593	5.88235294	0.00215011	0.17	0.0	10	8	5	false	0011000011	8.0	3	0	false	0	3337
38594	4.72727273	0.00348738	0.21153846	0.0	9	8	4	false	0011000001	8.0	4	0	false	0	5819
38595	5.44196429	0.10030676	0.18375718	0.0	12	8	3	false	1011001100	8.0	5	0	false	0	3512722
38596	6.26339286	0.04043873	0.15965788	0.0	13	8	4	false	1001001110	8.0	4	0	false	0	1654279
38597	6.94196429	0.01750925	0.14405145	0.0	13	8	4	false	1111110010	8.0	4	0	false	0	303850
38598	6.3030303	0.01475992	0.15865385	0.0	12	8	5	false	0011110010	8.0	3	0	false	0	256922
38599	7.41964286	0.03366273	0.13477738	0.0	14	8	5	false	1011110010	8.0	3	0	false	0	626168
38600	5.46938776	0.00785987	0.18283582	0.0	10	8	5	false	0101100001	8.0	3	0	false	0	37834
38601	4.71428571	0.00244734	0.21212121	0.0	9	8	5	false	0101000101	8.0	3	0	false	0	16099
38602	6.32727273	0.00774813	0.15804598	0.0	12	8	5	false	0101000011	8.0	3	0	false	0	35316
38603	8.35874439	0.02856837	0.11963519	0.0	15	8	6	false	1101100001	8.0	2	0	false	0	246230
38604	9.90740741	0.00278717	0.10093458	0.0	18	8	6	false	1101000101	8.0	2	0	false	0	18086
38605	9.57847534	0.02686986	0.10440075	0.0	17	8	6	false	1101000011	8.0	2	0	false	0	260528
38606	6.61809045	0.00513842	0.15110099	0.0	12	8	5	false	0111111100	8.0	3	0	false	0	27959
38607	6.57142857	0.0142909	0.15217391	0.0	12	8	5	false	1111111100	8.0	3	0	false	0	138378
38608	7.2815534	0.01084958	0.13733333	0.0	14	8	6	false	0101110010	8.0	2	0	false	0	125286
38609	8.03571429	0.01411393	0.12444444	0.0	15	8	5	false	1110001110	8.0	3	0	false	0	596890
38610	6.15656566	0.00523695	0.16242822	0.0	10	8	4	false	0110001110	8.0	4	0	false	0	42854
38611	5.42424242	0.01075937	0.18435754	0.0	10	8	3	false	0110001100	8.0	5	0	false	0	79380
38612	6.43518519	0.01582806	0.15539568	0.0	13	8	4	false	1001000101	8.0	4	0	false	0	218632
38613	9.21076233	0.01411221	0.10856865	0.0	17	8	6	false	1001000011	8.0	2	0	false	0	154535
38614	4.28571429	0.00771091	0.23333333	0.0	8	8	5	false	0001000101	8.0	3	0	false	0	41439
38615	6.16666667	0.00304489	0.16216216	0.0	10	8	7	false	0001000011	8.0	1	0	false	0	18384
38616	7.12946429	0.04988979	0.14026299	0.0	14	8	6	false	1011111100	8.0	2	0	false	0	1479704
38617	8.75892857	0.04931868	0.11416922	0.0	16	8	6	false	1101110010	8.0	2	0	false	0	2431214
38618	8.28282828	0.01452192	0.12073171	0.0	17	8	6	false	0011111100	8.0	2	0	false	0	110492
38619	6.78787879	0.00736166	0.14732143	0.0	13	8	4	false	0011100010	8.0	4	0	false	0	104983
38620	6.50505051	0.01455544	0.15372671	0.0	13	8	5	false	0001110010	8.0	3	0	false	0	240859
38621	10.32323232	0.00498456	0.09686888	0.0	19	8	6	false	0010001110	8.0	2	0	false	0	54332
38622	7.57589286	0.02351854	0.13199764	0.0	16	8	4	false	1110001100	8.0	4	0	false	0	505175
38623	8.33482143	0.01937559	0.11997858	0.0	16	8	5	false	1010001110	8.0	3	0	false	0	818852
38624	7.15625	0.006522	0.13973799	0.0	13	8	3	false	1011100010	8.0	5	0	false	0	180069
38625	7.86160714	0.04096842	0.12720045	0.0	15	8	5	false	1001110010	8.0	3	0	false	0	1394530
38626	6.07964602	0.00169931	0.16448326	0.0	14	8	2	false	1111010110	8.0	6	0	false	0	4680
38627	3.88284519	0.0	0.2575431	0.0	7	8	0	false	1111010100	8.0	8	0	false	0	0
38628	5.91981132	0.00164411	0.1689243	0.0	14	8	2	false	0111010110	8.0	6	0	false	0	5873
38629	4.01568627	0.0	0.24902344	0.0	8	8	0	false	0111010100	8.0	8	0	false	0	0
38630	7.10714286	0.02005148	0.14070352	0.0	13	8	4	false	1011010110	8.0	4	0	false	0	771828
38631	6.70707071	0.01430839	0.14909639	0.0	14	8	4	false	0011010110	8.0	4	0	false	0	270736
38632	8.28	0.00539337	0.12077295	0.0	19	8	7	false	0101111100	8.0	1	0	false	0	37118
38633	8.28125	0.02988818	0.12075472	0.0	16	8	7	false	1101111100	8.0	1	0	false	0	924902
38634	5.68421053	0.00460325	0.17592593	0.0	12	8	4	false	0110000101	8.0	4	0	false	0	14769
38635	7.46103896	0.00250644	0.13402959	0.0	14	8	5	false	0110000011	8.0	3	0	false	0	12634
38636	6.57961783	0.00307345	0.15198451	0.0	13	8	4	false	0110000001	8.0	4	0	false	0	13418
38637	7.53703704	0.01404851	0.13267813	0.0	16	8	5	false	1110000101	8.0	3	0	false	0	201621
38638	10.04484305	0.00458951	0.09955357	0.0	18	8	6	false	1110000011	8.0	2	0	false	0	49954
38639	5.59574468	0.01351278	0.17870722	0.0	15	8	3	false	0101001100	8.0	5	0	false	0	115839
38640	5.57803468	0.01100939	0.17927461	0.0	9	8	4	false	0100001110	8.0	4	0	false	0	128845
38641	4.96531792	0.01809814	0.20139697	0.0	9	8	3	false	0100001100	8.0	5	0	false	0	183046
38642	7.35353535	0.02071349	0.13598901	0.0	18	8	6	false	0001111100	8.0	2	0	false	0	198031
38643	8.77232143	0.01813741	0.11399491	0.0	16	8	4	false	1101001100	8.0	4	0	false	0	109702
38644	8.10267857	0.01338447	0.12341598	0.0	15	8	5	false	1100001110	8.0	3	0	false	0	263510
38645	7.30357143	0.07481461	0.13691932	0.0	15	8	6	false	1001111100	8.0	2	0	false	0	2716956
38646	3.45454545	0.00314597	0.28947368	0.0	6	8	6	false	0010000101	8.0	2	0	false	0	6489
38647	6.46	0.00346897	0.15479876	0.0	11	8	6	false	0010000011	8.0	2	0	false	0	9671
38648	5.30188679	0.0049041	0.1886121	0.0	10	8	5	false	0010000001	8.0	3	0	false	0	12050
38649	9.28251121	0.00532047	0.10772947	0.0	17	8	5	false	1110000001	8.0	3	0	false	0	35958
38650	8.10185185	0.0136019	0.12342857	0.0	17	8	5	false	1010000101	8.0	3	0	false	0	170456
38651	9.96412556	0.00804426	0.10036004	0.0	19	8	5	false	1010000011	8.0	3	0	false	0	91780
38652	8.98654709	0.0096121	0.11127745	0.0	18	8	4	false	1010000001	8.0	4	0	false	0	72168
38653	6.71212121	0.00878045	0.1489842	0.0	12	8	4	false	0110110010	8.0	4	0	false	0	181098
38654	7.1010101	0.00476425	0.14082504	0.0	13	8	3	false	0110100010	8.0	5	0	false	0	83991
38655	9.25252525	0.01150544	0.1080786	0.0	18	8	5	false	0010001100	8.0	3	0	false	0	114410
38656	6.34343434	0.0211014	0.15764331	0.0	16	8	4	false	0001001100	8.0	4	0	false	0	308754
38657	5.77777778	0.00877934	0.17307692	0.0	10	8	4	false	0000001110	8.0	4	0	false	0	221395
38658	4.68686869	0.02107116	0.21336207	0.0	9	8	3	false	0000001100	8.0	5	0	false	0	342222
38659	7.83035714	0.01902823	0.1277081	0.0	15	8	4	false	1100001100	8.0	4	0	false	0	218381
38660	7.76785714	0.03907664	0.12873563	0.0	17	8	4	false	1010001100	8.0	4	0	false	0	947974
38661	5.74107143	0.06743274	0.17418351	0.0	13	8	3	false	1001001100	8.0	5	0	false	0	2095583
38662	5.96428571	0.01736839	0.16766467	0.0	11	8	3	false	1000001110	8.0	5	0	false	0	484811
38663	5.20089286	0.03702337	0.19227468	0.0	10	8	2	false	1000001100	8.0	6	0	false	0	641610
38664	7.48214286	0.0198507	0.13365155	0.0	16	8	4	false	1110110010	8.0	4	0	false	0	684502
38665	8.04464286	0.00516427	0.12430633	0.0	15	8	4	false	1101010110	8.0	4	0	false	0	136736
38666	6.57522124	0.00387251	0.15208614	0.0	16	8	4	false	0101010110	8.0	4	0	false	0	60394
38667	7.55555556	0.01168458	0.13235294	0.0	15	8	6	false	0010110010	8.0	2	0	false	0	233749
38668	8.23660714	0.01908446	0.12140921	0.0	17	8	4	false	1110100010	8.0	4	0	false	0	515546
38669	9.17410714	0.0121476	0.10900243	0.0	16	8	6	false	1010110010	8.0	2	0	false	0	228893
38670	5.46017699	0.00346158	0.18314425	0.0	11	8	2	false	1011010100	8.0	6	0	false	0	16694
38671	7.30803571	0.0252603	0.13683568	0.0	14	8	4	false	1001010110	8.0	4	0	false	0	766080
38672	4.6039604	0.00198452	0.2172043	0.0	11	8	2	false	0011010100	8.0	6	0	false	0	1867
38673	6.18181818	0.02004108	0.16176471	0.0	15	8	4	false	0001010110	8.0	4	0	false	0	398584
38674	5.80357143	0.00492601	0.17230769	0.0	11	8	4	false	0101000001	8.0	4	0	false	0	16316
38675	5.3253012	0.00637054	0.18778281	0.0	11	8	4	false	0100000101	8.0	4	0	false	0	29481
38676	6.88652482	0.00534521	0.14521112	0.0	13	8	5	false	0100000011	8.0	3	0	false	0	31154
38677	6.11188811	0.00533635	0.16361556	0.0	12	8	4	false	0100000001	8.0	4	0	false	0	23709
38678	9.04035874	0.01878198	0.11061508	0.0	16	8	5	false	1101000001	8.0	3	0	false	0	79885
38679	7.75	0.00965074	0.12903226	0.0	15	8	5	false	1100000101	8.0	3	0	false	0	97073
38680	9.60538117	0.01137525	0.10410831	0.0	17	8	6	false	1100000011	8.0	2	0	false	0	128820
38681	6.35353535	0.01917424	0.15739269	0.0	11	8	5	false	0110111100	8.0	3	0	false	0	163445
38682	6.91517857	0.03569035	0.14460943	0.0	14	8	5	false	1110111100	8.0	3	0	false	0	709062
38683	8.95067265	0.01009602	0.11172345	0.0	16	8	5	false	1100000001	8.0	3	0	false	0	52296
38684	8.4573991	0.0120984	0.11823966	0.0	16	8	5	false	1001000001	8.0	3	0	false	0	69591
38685	5.48148148	0.01310509	0.18243243	0.0	14	8	3	false	1000000101	8.0	5	0	false	0	98695
38686	9.26457399	0.01309892	0.10793804	0.0	18	8	5	false	1000000011	8.0	3	0	false	0	147777
38687	8.37668161	0.01188021	0.11937901	0.0	17	8	4	false	1000000001	8.0	4	0	false	0	75781
38688	5.05405405	0.0035448	0.19786096	0.0	9	8	6	false	0001000001	8.0	2	0	false	0	12487
38689	4.25531915	0.00744001	0.235	0.0	8	8	4	false	0000000101	8.0	4	0	false	0	28921
38690	6.06122449	0.00537692	0.16498316	0.0	10	8	6	false	0000000011	8.0	2	0	false	0	25456
38691	4.94117647	0.00571345	0.20238095	0.0	9	8	5	false	0000000001	8.0	3	0	false	0	19659
38692	6.2716763	0.00812101	0.159447	0.0	11	8	4	false	0100110010	8.0	4	0	false	0	136864
38693	6.72254335	0.00428262	0.14875322	0.0	12	8	3	false	0100100010	8.0	5	0	false	0	92029
38694	10.86868687	0.00832548	0.09200743	0.0	20	8	7	false	0010111100	8.0	1	0	false	0	38561
38695	7.42410714	0.01760242	0.13469633	0.0	15	8	4	false	1100110010	8.0	4	0	false	0	689065
38696	9.59821429	0.01755356	0.10418605	0.0	19	8	7	false	1010111100	8.0	1	0	false	0	260891
38697	8.26262626	0.00452739	0.12102689	0.0	16	8	5	false	0010100010	8.0	3	0	false	0	95672
38698	6.80808081	0.00959589	0.14688427	0.0	14	8	4	false	0001100010	8.0	4	0	false	0	159110
38699	5.6969697	0.00683112	0.17553191	0.0	11	8	4	false	0000110010	8.0	4	0	false	0	122550
38700	5.81818182	0.00311728	0.171875	0.0	11	8	3	false	0000100010	8.0	5	0	false	0	36266
38701	8.27678571	0.00917604	0.12081985	0.0	16	8	4	false	1100100010	8.0	4	0	false	0	363642
38702	8.22321429	0.00577915	0.12160695	0.0	17	8	4	false	1010100010	8.0	4	0	false	0	169974
38703	7.58928571	0.0039831	0.13176471	0.0	14	8	3	false	1001100010	8.0	5	0	false	0	109447
38704	7.70535714	0.00828337	0.12977984	0.0	14	8	4	false	1000110010	8.0	4	0	false	0	174748
38705	6.93303571	0.00276767	0.14423696	0.0	15	8	2	false	1000100010	8.0	6	0	false	0	26147
38706	6.75892857	0.00957336	0.14795244	0.0	17	8	3	false	1110010110	8.0	5	0	false	0	118617
38707	5.10822511	6.6475E-4	0.19576271	0.0	14	8	1	false	1110010100	8.0	7	0	false	0	555
38708	6.07575758	0.0079164	0.16458853	0.0	13	8	3	false	0110010110	8.0	5	0	false	0	46398
38709	4.45365854	6.272E-4	0.2245345	0.0	10	8	1	false	0110010100	8.0	7	0	false	0	830
38710	5.98019802	0.00547176	0.16721854	0.0	12	8	3	false	0111110100	8.0	5	0	false	0	46236
38711	6.05803571	0.01184858	0.16507001	0.0	12	8	3	false	1111110100	8.0	5	0	false	0	146483
38712	8.81696429	0.01503876	0.11341772	0.0	18	8	5	false	1010010110	8.0	3	0	false	0	351436
38713	8.72727273	0.01066522	0.11458333	0.0	17	8	5	false	0010010110	8.0	3	0	false	0	134223
38714	5.92485549	0.02027029	0.16878049	0.0	11	8	5	false	0100111100	8.0	3	0	false	0	195480
38715	7.12745098	0.00600514	0.14030261	0.0	14	8	3	false	0111100010	8.0	5	0	false	0	108321
38716	5.8989899	0.01719543	0.16952055	0.0	12	8	5	false	0011110100	8.0	3	0	false	0	305598
38717	6.83035714	0.02529357	0.14640523	0.0	12	8	5	false	1011110100	8.0	3	0	false	0	361438
38718	6.72321429	0.04137395	0.14873838	0.0	13	8	5	false	1100111100	8.0	3	0	false	0	1213826
38719	7.67857143	0.03105955	0.13023256	0.0	14	8	4	false	1111100010	8.0	4	0	false	0	676971
38720	5.41414141	0.01087646	0.18470149	0.0	11	8	5	false	0000111100	8.0	3	0	false	0	90918
38721	6.63839286	0.02759575	0.15063887	0.0	12	8	5	false	1000111100	8.0	3	0	false	0	833909
38722	5.99561404	0.00141563	0.16678859	0.0	12	8	2	false	1101010100	8.0	6	0	false	0	4632
38723	6.57589286	0.01426087	0.1520706	0.0	16	8	3	false	1100010110	8.0	5	0	false	0	334952
38724	4.96956522	0.00192469	0.20122485	0.0	13	8	1	false	1100010100	8.0	7	0	false	0	8112
38725	4.84868421	0.0011023	0.20624152	0.0	13	8	2	false	0101010100	8.0	6	0	false	0	1332
38726	5.71676301	0.01020853	0.17492417	0.0	12	8	3	false	0100010110	8.0	5	0	false	0	101971
38727	4.06703911	0.00136551	0.24587912	0.0	9	8	1	false	0100010100	8.0	7	0	false	0	2528
38728	4.70614035	0.00204963	0.21248835	0.0	9	8	2	false	1111011100	8.0	6	0	false	0	2422
38729	4.59210526	0.00167384	0.21776504	0.0	9	8	1	false	1111011010	8.0	7	0	false	0	2231
38730	4.72540984	0.0025822	0.21162186	0.0	9	8	2	false	0111011100	8.0	6	0	false	0	3987
38731	4.5125	0.00175686	0.22160665	0.0	9	8	1	false	0111011010	8.0	7	0	false	0	2665
38732	6.60194175	0.00545818	0.15147059	0.0	14	8	5	false	0101110100	8.0	3	0	false	0	67034
38733	8.03571429	0.02073894	0.12444444	0.0	14	8	5	false	1101110100	8.0	3	0	false	0	663501
38734	6.98666667	0.0018489	0.14312977	0.0	15	8	3	false	1010010100	8.0	5	0	false	0	4220
38735	5.72246696	0.00410703	0.17474981	0.0	12	8	2	false	1001010100	8.0	6	0	false	0	19859
38736	6.5	0.02436023	0.15384615	0.0	15	8	3	false	1000010110	8.0	5	0	false	0	389436
38737	4.98684211	0.00207388	0.2005277	0.0	12	8	1	false	1000010100	8.0	7	0	false	0	6223
38738	6.22	0.00120348	0.1607717	0.0	14	8	3	false	0010010100	8.0	5	0	false	0	1001
38739	4.40196078	0.00182735	0.22717149	0.0	12	8	2	false	0001010100	8.0	6	0	false	0	1749
38740	4.64646465	0.02433056	0.21521739	0.0	9	8	3	false	0000010110	8.0	5	0	false	0	520367
38741	3.22330097	8.5233E-4	0.31024096	0.0	6	8	1	false	0000010100	8.0	7	0	false	0	984
38742	7.39393939	0.02333352	0.1352459	0.0	16	8	5	false	0011011100	8.0	3	0	false	0	279592
38743	5.37373737	0.00938833	0.18609023	0.0	10	8	3	false	0011011010	8.0	5	0	false	0	80760
38744	5.81818182	0.01723476	0.171875	0.0	13	8	5	false	0001110100	8.0	3	0	false	0	272021
38745	7.47619048	0.01176347	0.13375796	0.0	15	8	5	false	0101100010	8.0	3	0	false	0	173113
38746	6.17857143	0.09411663	0.16184971	0.0	13	8	5	false	1011011100	8.0	3	0	false	0	3494505
38747	5.96428571	0.02595323	0.16766467	0.0	10	8	3	false	1011011010	8.0	5	0	false	0	505739
38748	7.14732143	0.03147351	0.13991255	0.0	13	8	5	false	1001110100	8.0	3	0	false	0	828080
38749	9.70982143	0.04181882	0.10298851	0.0	17	8	6	false	1101100010	8.0	2	0	false	0	2881510
38750	5.88275862	0.01191141	0.16998828	0.0	16	8	4	false	0101011100	8.0	4	0	false	0	132567
38751	5.39716312	0.00957891	0.18528252	0.0	12	8	3	false	0101011010	8.0	5	0	false	0	91651
38752	6.72321429	0.01445072	0.14873838	0.0	15	8	4	false	1101011100	8.0	4	0	false	0	449360
38753	7.04464286	0.01125283	0.14195184	0.0	14	8	3	false	1101011010	8.0	5	0	false	0	210567
38754	5.81313131	0.01448004	0.17202433	0.0	11	8	4	false	0110110100	8.0	4	0	false	0	125323
38755	6.52525253	0.0381724	0.15325077	0.0	17	8	5	false	0001011100	8.0	3	0	false	0	569612
38756	7.45454545	0.01163204	0.13414634	0.0	17	8	5	false	0001011010	8.0	3	0	false	0	176672
38757	6.53571429	0.03023897	0.15300546	0.0	15	8	4	false	1110110100	8.0	4	0	false	0	910192
38758	6.37946429	0.11404229	0.15675297	0.0	14	8	5	false	1001011100	8.0	3	0	false	0	4322571
38759	7.43303571	0.01937527	0.13453453	0.0	15	8	5	false	1001011010	8.0	3	0	false	0	576374
38760	7.39393939	0.01592208	0.1352459	0.0	15	8	6	false	0010110100	8.0	2	0	false	0	286093
38761	8.57589286	0.01492631	0.11660593	0.0	16	8	6	false	1010110100	8.0	2	0	false	0	209515
38762	5.40462428	0.01672186	0.18502674	0.0	10	8	4	false	0100110100	8.0	4	0	false	0	122877
38763	5.5	0.02185202	0.18181818	0.0	10	8	4	false	0110011100	8.0	4	0	false	0	211590
38764	5.83333333	0.00595597	0.17142857	0.0	10	8	3	false	0110011010	8.0	5	0	false	0	67286
38765	6.51339286	0.03772218	0.15352981	0.0	14	8	4	false	1100110100	8.0	4	0	false	0	1319680
38766	6.04464286	0.02896684	0.16543575	0.0	13	8	4	false	1110011100	8.0	4	0	false	0	505794
38767	6.52678571	0.00906459	0.15321477	0.0	13	8	3	false	1110011010	8.0	5	0	false	0	214940
38768	4.72727273	0.0147661	0.21153846	0.0	9	8	4	false	0000110100	8.0	4	0	false	0	199515
38769	9.91919192	0.01573264	0.10081466	0.0	19	8	6	false	0010011100	8.0	2	0	false	0	138242
38770	6.02020202	0.01833846	0.16610738	0.0	11	8	4	false	0010011010	8.0	4	0	false	0	293004
38771	8.62053571	0.03834581	0.11600207	0.0	18	8	6	false	1010011100	8.0	2	0	false	0	843621
38772	7.36160714	0.01980316	0.1358399	0.0	13	8	4	false	1010011010	8.0	4	0	false	0	326691
38773	6.75	0.01987069	0.14814815	0.0	13	8	4	false	1000110100	8.0	4	0	false	0	543093
38774	6.34313725	0.00360234	0.1576507	0.0	13	8	3	false	0111100100	8.0	5	0	false	0	42410
38775	6.73809524	0.00211045	0.14840989	0.0	15	8	3	false	0111000110	8.0	5	0	false	0	8811
38776	5.91981132	0.001213	0.1689243	0.0	14	8	2	false	0111000100	8.0	6	0	false	0	4052
38777	6.76785714	0.01557229	0.14775726	0.0	13	8	4	false	1111100100	8.0	4	0	false	0	379016
38778	7.66071429	0.01226122	0.13053613	0.0	15	8	4	false	1111000110	8.0	4	0	false	0	1137124
38779	5.04624277	0.03308832	0.19816724	0.0	10	8	4	false	0100011100	8.0	4	0	false	0	399281
38780	5.3583815	0.01072389	0.18662352	0.0	10	8	3	false	0100011010	8.0	5	0	false	0	142847
38781	6.50505051	0.01198204	0.15372671	0.0	13	8	5	false	0011100100	8.0	3	0	false	0	220305
38782	7.55555556	0.01083645	0.13235294	0.0	15	8	5	false	0011000110	8.0	3	0	false	0	256639
38783	5.81696429	0.04742859	0.17191097	0.0	12	8	4	false	1100011100	8.0	4	0	false	0	1234996
38784	6.41517857	0.01488011	0.15588031	0.0	12	8	3	false	1100011010	8.0	5	0	false	0	417380
38785	6.85267857	0.0100475	0.14592834	0.0	14	8	3	false	1111000100	8.0	5	0	false	0	446587
38786	6.44196429	0.01870672	0.15523216	0.0	12	8	4	false	1011100100	8.0	4	0	false	0	355738
38787	7.28125	0.03114028	0.13733906	0.0	14	8	4	false	1011000110	8.0	4	0	false	0	2196993
38788	5.6460177	0.00496374	0.17711599	0.0	10	8	3	false	1011101000	8.0	5	0	false	0	15402
38789	5.43564356	0.0083193	0.18397086	0.0	11	8	4	false	0011101000	8.0	4	0	false	0	27166
38790	4.64646465	0.04027945	0.21521739	0.0	10	8	4	false	0000011100	8.0	4	0	false	0	754087
38791	5.65656566	0.02636917	0.17678571	0.0	10	8	4	false	0000011010	8.0	4	0	false	0	583634
38792	5.74107143	0.06885238	0.17418351	0.0	11	8	4	false	1000011100	8.0	4	0	false	0	1708146
38793	6.85714286	0.026119	0.14583333	0.0	12	8	4	false	1000011010	8.0	4	0	false	0	534694
38794	6.98095238	0.0043082	0.14324693	0.0	15	8	5	false	0101100100	8.0	3	0	false	0	76438
38795	7.40540541	0.00418161	0.1350365	0.0	17	8	5	false	0101000110	8.0	3	0	false	0	77910
38796	8.97767857	0.01113964	0.11138737	0.0	15	8	6	false	1101100100	8.0	2	0	false	0	257240
38797	10.39732143	0.0053913	0.09617862	0.0	17	8	6	false	1101000110	8.0	2	0	false	0	116480
38798	6.70707071	0.01087409	0.14909639	0.0	14	8	4	false	0011000100	8.0	4	0	false	0	181636
38799	6.3030303	0.01248171	0.15865385	0.0	14	8	5	false	0001100100	8.0	3	0	false	0	231902
38800	6.98989899	0.0129662	0.14306358	0.0	16	8	5	false	0001000110	8.0	3	0	false	0	322584
38801	6.48214286	0.02610993	0.15426997	0.0	13	8	3	false	1011000100	8.0	5	0	false	0	903443
38802	6.79464286	0.01390729	0.14717477	0.0	13	8	4	false	1001100100	8.0	4	0	false	0	172644
38803	7.51785714	0.02519315	0.13301663	0.0	15	8	4	false	1001000110	8.0	4	0	false	0	1090226
38804	5.84577114	0.00455812	0.17106383	0.0	11	8	3	false	0110101000	8.0	5	0	false	0	22115
38805	6.94196429	0.0171024	0.14405145	0.0	15	8	4	false	1110101000	8.0	4	0	false	0	194530
38806	6.195	0.00733718	0.1614205	0.0	11	8	4	false	0111111000	8.0	4	0	false	0	70141
38807	6.20982143	0.02003129	0.16103523	0.0	11	8	4	false	1111111000	8.0	4	0	false	0	246146
38808	6.25252525	0.0086984	0.15993538	0.0	12	8	4	false	0110100100	8.0	4	0	false	0	85358
38809	6.86868687	0.00719451	0.14558824	0.0	14	8	4	false	0110000110	8.0	4	0	false	0	58750
38810	6.07575758	0.00604464	0.16458853	0.0	13	8	3	false	0110000100	8.0	5	0	false	0	33260
38811	5.33333333	0.03036484	0.1875	0.0	10	8	5	false	0011111000	8.0	3	0	false	0	422413
38812	7.32589286	0.03267412	0.13650213	0.0	16	8	5	false	1110100100	8.0	3	0	false	0	1158936
38813	8.50446429	0.02081876	0.1175853	0.0	18	8	5	false	1110000110	8.0	3	0	false	0	1695768
38814	6.3125	0.07439029	0.15841584	0.0	12	8	5	false	1011111000	8.0	3	0	false	0	2051763
38815	5.42857143	0.00363887	0.18421053	0.0	10	8	3	false	0100101000	8.0	5	0	false	0	22193
38816	8.16161616	0.01113701	0.12252475	0.0	16	8	6	false	0010100100	8.0	2	0	false	0	211056
38817	9.63636364	0.00834562	0.10377358	0.0	18	8	6	false	0010000110	8.0	2	0	false	0	133372
38818	7.75	0.01938155	0.12903226	0.0	17	8	4	false	1110000100	8.0	4	0	false	0	643150
38819	7.85714286	0.01740906	0.12727273	0.0	17	8	5	false	1010100100	8.0	3	0	false	0	483092
38820	8.90178571	0.02512982	0.11233701	0.0	19	8	5	false	1010000110	8.0	3	0	false	0	1254223
38821	7.0	0.00700823	0.14285714	0.0	14	8	4	false	1100101000	8.0	4	0	false	0	75094
38822	6.88888889	0.00377114	0.14516129	0.0	15	8	4	false	1010101000	8.0	4	0	false	0	19600
38823	6.11894273	0.00238248	0.16342693	0.0	11	8	3	false	1001101000	8.0	5	0	false	0	6791
38824	5.60964912	0.00118129	0.17826427	0.0	11	8	2	false	1000101000	8.0	6	0	false	0	1942
38825	6.64	0.00469463	0.15060241	0.0	14	8	5	false	0010101000	8.0	3	0	false	0	12868
38826	5.6372549	0.00973467	0.1773913	0.0	12	8	4	false	0001101000	8.0	4	0	false	0	39717
38827	4.85436893	0.00211437	0.206	0.0	10	8	3	false	0000101000	8.0	5	0	false	0	8300
38828	6.58415842	0.00942945	0.1518797	0.0	12	8	6	false	0101111000	8.0	2	0	false	0	83376
38829	7.75892857	0.04812931	0.12888377	0.0	14	8	6	false	1101111000	8.0	2	0	false	0	1576596
38830	5.95631068	0.00432607	0.16788916	0.0	12	8	3	false	0111101000	8.0	5	0	false	0	16379
38831	5.77678571	0.00327182	0.17310665	0.0	13	8	3	false	0111001010	8.0	5	0	false	0	9083
38832	5.69911504	0.00177628	0.17546584	0.0	13	8	2	false	0111001000	8.0	6	0	false	0	3297
38833	6.57522124	0.00307322	0.15208614	0.0	16	8	4	false	0101000100	8.0	4	0	false	0	39835
38834	5.84393064	0.01011041	0.17111771	0.0	11	8	4	false	0100100100	8.0	4	0	false	0	84674
38835	6.51445087	0.00936023	0.15350488	0.0	13	8	4	false	0100000110	8.0	4	0	false	0	126920
38836	5.71676301	0.00795635	0.17492417	0.0	12	8	3	false	0100000100	8.0	5	0	false	0	71589
38837	5.6969697	0.02369343	0.17553191	0.0	11	8	5	false	0001111000	8.0	3	0	false	0	289012
38838	6.47321429	0.02539766	0.15448276	0.0	12	8	4	false	1111101000	8.0	4	0	false	0	323861
38839	6.32142857	0.04204065	0.15819209	0.0	12	8	4	false	1111001010	8.0	4	0	false	0	1454121
38840	9.625	0.00442408	0.1038961	0.0	16	8	5	false	1101000100	8.0	3	0	false	0	54016
38841	7.375	0.02508218	0.13559322	0.0	15	8	5	false	1100100100	8.0	3	0	false	0	796638
38842	8.70535714	0.01300509	0.11487179	0.0	17	8	5	false	1100000110	8.0	3	0	false	0	762125
38843	6.80803571	0.07613969	0.14688525	0.0	13	8	5	false	1001111000	8.0	3	0	false	0	2845517
38844	1.71428571	0.00208139	0.58333333	0.0	3	8	5	false	0011001010	8.0	3	0	false	0	16794
38845	2.13333333	0.00467349	0.46875	0.0	4	8	4	false	0011001000	8.0	4	0	false	0	34766
38846	8.72727273	0.00855825	0.11458333	0.0	17	8	5	false	0010000100	8.0	3	0	false	0	115544
38847	6.18181818	0.01310552	0.16176471	0.0	15	8	4	false	0001000100	8.0	4	0	false	0	221711
38848	5.09090909	0.01122775	0.19642857	0.0	10	8	4	false	0000100100	8.0	4	0	false	0	140498
38849	5.41414141	0.012795	0.18470149	0.0	10	8	4	false	0000000110	8.0	4	0	false	0	289401
38850	4.64646465	0.0134703	0.21521739	0.0	9	8	3	false	0000000100	8.0	5	0	false	0	211433
38851	6.29910714	0.03105387	0.15875266	0.0	12	8	3	false	1111001000	8.0	5	0	false	0	672351
38852	7.11160714	0.02934651	0.14061519	0.0	13	8	4	false	1011001010	8.0	4	0	false	0	854693
38853	6.875	0.04200841	0.14545455	0.0	13	8	3	false	1011001000	8.0	5	0	false	0	922300
38854	7.95982143	0.01244302	0.12563096	0.0	16	8	4	false	1100000100	8.0	4	0	false	0	289307
38855	8.12053571	0.02167951	0.12314458	0.0	18	8	4	false	1010000100	8.0	4	0	false	0	526092
38856	6.71875	0.02170403	0.14883721	0.0	14	8	3	false	1001000100	8.0	5	0	false	0	474336
38857	6.10267857	0.01226482	0.16386247	0.0	14	8	3	false	1000100100	8.0	5	0	false	0	74065
38858	6.67410714	0.02085242	0.14983278	0.0	16	8	3	false	1000000110	8.0	5	0	false	0	438051
38859	5.875	0.01856997	0.17021277	0.0	15	8	2	false	1000000100	8.0	6	0	false	0	185124
38860	6.39252336	0.00981936	0.15643275	0.0	13	8	5	false	0101101000	8.0	3	0	false	0	41444
38861	6.408	0.01351226	0.15605493	0.0	13	8	5	false	0101001010	8.0	3	0	false	0	98036
38862	5.92424242	0.01809862	0.16879795	0.0	10	8	4	false	0110111000	8.0	4	0	false	0	310139
38863	8.49553571	0.02114518	0.11770888	0.0	15	8	6	false	1101101000	8.0	2	0	false	0	234266
38864	8.90625	0.03594345	0.1122807	0.0	15	8	6	false	1101001010	8.0	2	0	false	0	421890
38865	6.57142857	0.03388407	0.15217391	0.0	14	8	4	false	1110111000	8.0	4	0	false	0	810003
38866	6.24242424	0.02635045	0.16019417	0.0	13	8	6	false	0010111000	8.0	2	0	false	0	459044
38867	1.0	5.2376E-4	1.0	0.0	1	8	7	false	0001001010	8.0	1	0	false	0	1702
38868	9.85714286	0.01063392	0.10144928	0.0	16	8	6	false	1001001010	8.0	2	0	false	0	114991
38869	7.65625	0.02910033	0.13061224	0.0	14	8	6	false	1010111000	8.0	2	0	false	0	591442
38870	5.48554913	0.01650019	0.18229715	0.0	10	8	4	false	0100111000	8.0	4	0	false	0	303666
38871	6.46875	0.03008943	0.15458937	0.0	13	8	4	false	1100111000	8.0	4	0	false	0	887157
38872	8.00775194	0.00198934	0.12487899	0.0	15	8	5	false	0110001010	8.0	3	0	false	0	12450
38873	7.68888889	0.00323015	0.1300578	0.0	16	8	4	false	0110001000	8.0	4	0	false	0	20083
38874	5.05050505	0.00863426	0.198	0.0	10	8	4	false	0000111000	8.0	4	0	false	0	126079
38875	10.73660714	0.00445319	0.09313929	0.0	17	8	6	false	1110001010	8.0	2	0	false	0	87913
38876	6.63392857	0.01534918	0.15074024	0.0	12	8	4	false	1000111000	8.0	4	0	false	0	391938
38877	1.8	0.00260683	0.55555556	0.0	3	8	6	false	0010001010	8.0	2	0	false	0	30763
38878	2.18181818	0.00531379	0.45833333	0.0	4	8	5	false	0010001000	8.0	3	0	false	0	49483
38879	10.59821429	0.00599864	0.09435552	0.0	18	8	5	false	1110001000	8.0	3	0	false	0	90265
38880	11.50892857	0.00653012	0.08688906	0.0	18	8	5	false	1010001010	8.0	3	0	false	0	93377
38881	11.13839286	0.01192584	0.08977956	0.0	19	8	4	false	1010001000	8.0	4	0	false	0	115674
38882	4.3173913	0.002149	0.23162135	0.0	9	8	1	false	1111011000	8.0	7	0	false	0	3380
38883	7.60888889	0.00119391	0.13142523	0.0	14	8	3	false	1111010010	8.0	5	0	false	0	3704
38884	4.62337662	6.755E-4	0.21629213	0.0	10	8	1	false	1111010000	8.0	7	0	false	0	593
38885	4.29674797	0.00240464	0.23273415	0.0	8	8	1	false	0111011000	8.0	7	0	false	0	4419
38886	7.19902913	0.00123212	0.13890762	0.0	14	8	3	false	0111010010	8.0	5	0	false	0	4135
38887	4.58299595	7.051E-4	0.21819788	0.0	9	8	1	false	0111010000	8.0	7	0	false	0	809
38888	4.60606061	0.02851729	0.21710526	0.0	9	8	3	false	0011011000	8.0	5	0	false	0	395339
38889	1.71428571	0.0027524	0.58333333	0.0	3	8	5	false	0011010010	8.0	3	0	false	0	8594
38890	5.05050505	0.0198356	0.198	0.0	10	8	3	false	0011010000	8.0	5	0	false	0	309164
38891	5.41517857	0.07541528	0.18466612	0.0	11	8	3	false	1011011000	8.0	5	0	false	0	1969243
38892	10.41517857	0.01773126	0.09601372	0.0	17	8	5	false	1011010010	8.0	3	0	false	0	169679
38893	5.86607143	0.0478039	0.17047184	0.0	12	8	3	false	1011010000	8.0	5	0	false	0	908148
38894	6.44094488	0.00955152	0.15525672	0.0	14	8	4	false	0101001000	8.0	4	0	false	0	62281
38895	7.21259843	0.00666757	0.13864629	0.0	14	8	5	false	0100001010	8.0	3	0	false	0	50813
38896	7.06870229	0.00771329	0.14146868	0.0	15	8	4	false	0100001000	8.0	4	0	false	0	58704
38897	8.94642857	0.02230517	0.11177645	0.0	16	8	5	false	1101001000	8.0	3	0	false	0	252649
38898	9.82142857	0.01355145	0.10181818	0.0	16	8	6	false	1100001010	8.0	2	0	false	0	194858
38899	1.33333333	0.00180367	0.75	0.0	2	8	6	false	0001001000	8.0	2	0	false	0	16974
38900	1.33333333	0.0013412	0.75	0.0	2	8	6	false	0000001010	8.0	2	0	false	0	12060
38901	1.71428571	0.00284077	0.58333333	0.0	3	8	5	false	0000001000	8.0	3	0	false	0	38919
38902	9.77232143	0.01197916	0.10232983	0.0	17	8	5	false	1100001000	8.0	3	0	false	0	183101
38903	9.84375	0.01255745	0.1015873	0.0	17	8	5	false	1001001000	8.0	3	0	false	0	104916
38904	10.68303571	0.00695623	0.09360635	0.0	17	8	5	false	1000001010	8.0	3	0	false	0	132365
38905	10.49107143	0.00881158	0.09531915	0.0	18	8	4	false	1000001000	8.0	4	0	false	0	140292
38906	5.36054422	0.01062063	0.18654822	0.0	13	8	3	false	0101011000	8.0	5	0	false	0	126844
38907	7.60747664	0.00584744	0.13144963	0.0	15	8	5	false	0101010010	8.0	3	0	false	0	27970
38908	6.87053571	0.01217772	0.14554906	0.0	13	8	3	false	1101011000	8.0	5	0	false	0	316756
38909	9.63839286	0.00952292	0.10375174	0.0	17	8	5	false	1101010010	8.0	3	0	false	0	200381
38910	7.27272727	0.02532509	0.1375	0.0	18	8	5	false	0001011000	8.0	3	0	false	0	350314
38911	1.0	6.1833E-4	1.0	0.0	1	8	7	false	0001010010	8.0	1	0	false	0	1056
38912	7.05357143	0.05188835	0.14177215	0.0	15	8	5	false	1001011000	8.0	3	0	false	0	1777808
38913	12.64285714	0.00405736	0.07909605	0.0	20	8	7	false	1001010010	8.0	1	0	false	0	293845
38914	5.32323232	0.01672003	0.18785579	0.0	9	8	3	false	0110011000	8.0	5	0	false	0	267263
38915	9.0990991	0.00190052	0.10990099	0.0	17	8	5	false	0110010010	8.0	3	0	false	0	3961
38916	5.7020202	0.00968804	0.17537644	0.0	10	8	3	false	0110010000	8.0	5	0	false	0	173521
38917	6.33830846	0.01082786	0.1577708	0.0	12	8	4	false	0111110000	8.0	4	0	false	0	151453
38918	6.09375	0.02382261	0.16410256	0.0	14	8	3	false	1110011000	8.0	5	0	false	0	596574
38919	11.36160714	0.00323758	0.08801572	0.0	19	8	5	false	1110010010	8.0	3	0	false	0	63678
38920	6.52678571	0.01560497	0.15321477	0.0	15	8	3	false	1110010000	8.0	5	0	false	0	456779
38921	6.375	0.02780887	0.15686275	0.0	12	8	4	false	1111110000	8.0	4	0	false	0	430559
38922	5.37373737	0.04895315	0.18609023	0.0	12	8	4	false	0010011000	8.0	4	0	false	0	1018241
38923	1.8	0.00341555	0.55555556	0.0	3	8	6	false	0010010010	8.0	2	0	false	0	9455
38924	5.95959596	0.03257922	0.16779661	0.0	13	8	4	false	0010010000	8.0	4	0	false	0	730372
38925	5.61616162	0.04252929	0.17805755	0.0	11	8	5	false	0011110000	8.0	3	0	false	0	837543
38926	6.71428571	0.05522004	0.14893617	0.0	13	8	4	false	1010011000	8.0	4	0	false	0	1178152
38927	14.38392857	0.00636772	0.06952204	0.0	22	8	6	false	1010010010	8.0	2	0	false	0	19874
38928	7.41517857	0.03485876	0.13485852	0.0	14	8	4	false	1010010000	8.0	4	0	false	0	715192
38929	6.70982143	0.08159599	0.14903526	0.0	13	8	5	false	1011110000	8.0	3	0	false	0	1977043
38930	5.72972973	0.00454212	0.1745283	0.0	14	8	3	false	0101010000	8.0	5	0	false	0	39577
38931	4.94219653	0.02503153	0.20233918	0.0	9	8	3	false	0100011000	8.0	5	0	false	0	427593
38932	8.35779817	0.00483234	0.11964874	0.0	16	8	5	false	0100010010	8.0	3	0	false	0	16926
38933	5.32369942	0.01462044	0.18783931	0.0	9	8	3	false	0100010000	8.0	5	0	false	0	216398
38934	6.73529412	0.01328453	0.14847162	0.0	13	8	6	false	0101110000	8.0	2	0	false	0	167800
38935	7.26785714	0.00547306	0.13759214	0.0	13	8	3	false	1101010000	8.0	5	0	false	0	113446
38936	6.05357143	0.03333868	0.16519174	0.0	13	8	3	false	1100011000	8.0	5	0	false	0	1025085
38937	10.5	0.00861067	0.0952381	0.0	18	8	5	false	1100010010	8.0	3	0	false	0	194222
38938	6.57589286	0.02171663	0.1520706	0.0	14	8	3	false	1100010000	8.0	5	0	false	0	656634
38939	8.10267857	0.06835033	0.12341598	0.0	15	8	6	false	1101110000	8.0	2	0	false	0	3124840
38940	8.14141414	0.00888395	0.12282878	0.0	19	8	5	false	0001010000	8.0	3	0	false	0	94985
38941	5.13131313	0.04904415	0.19488189	0.0	11	8	4	false	0000011000	8.0	4	0	false	0	1134071
38942	1.33333333	0.0015168	0.75	0.0	2	8	6	false	0000010010	8.0	2	0	false	0	3301
38943	5.85858586	0.01666839	0.17068966	0.0	12	8	4	false	0000010000	8.0	4	0	false	0	380736
38944	6.3030303	0.01360051	0.15865385	0.0	12	8	5	false	0011100000	8.0	3	0	false	0	208524
38945	5.8989899	0.03046167	0.16952055	0.0	12	8	5	false	0001110000	8.0	3	0	false	0	515148
38946	7.88839286	0.01837052	0.12676853	0.0	16	8	5	false	1001010000	8.0	3	0	false	0	545113
38947	6.30803571	0.05513473	0.15852795	0.0	12	8	4	false	1000011000	8.0	4	0	false	0	1341050
38948	13.51339286	0.00473915	0.07400066	0.0	21	8	6	false	1000010010	8.0	2	0	false	0	442383
38949	7.08928571	0.01966665	0.14105793	0.0	13	8	4	false	1000010000	8.0	4	0	false	0	477831
38950	6.60714286	0.01131596	0.15135135	0.0	12	8	4	false	1011100000	8.0	4	0	false	0	144798
38951	7.17857143	0.08246804	0.13930348	0.0	14	8	5	false	1001110000	8.0	3	0	false	0	3185288
38952	6.11111111	0.02316021	0.16363636	0.0	11	8	4	false	0110110000	8.0	4	0	false	0	500123
38953	6.71212121	0.00853197	0.1489842	0.0	12	8	4	false	0110100000	8.0	4	0	false	0	180684
38954	6.83482143	0.04574183	0.1463096	0.0	15	8	4	false	1110110000	8.0	4	0	false	0	1446155
38955	6.74747475	0.04124453	0.14820359	0.0	14	8	6	false	0010110000	8.0	2	0	false	0	936731
38956	7.6875	0.02719621	0.1300813	0.0	16	8	5	false	1110100000	8.0	3	0	false	0	725990
38957	8.32142857	0.03892065	0.12017167	0.0	15	8	6	false	1010110000	8.0	2	0	false	0	853390
38958	5.64739884	0.0224044	0.17707267	0.0	10	8	4	false	0100110000	8.0	4	0	false	0	410186
38959	6.2716763	0.00779749	0.159447	0.0	11	8	4	false	0100100000	8.0	4	0	false	0	136140
38960	6.75	0.04263882	0.14814815	0.0	14	8	4	false	1100110000	8.0	4	0	false	0	1479820
38961	7.55555556	0.01062511	0.13235294	0.0	15	8	6	false	0010100000	8.0	2	0	false	0	213914
38962	6.50505051	0.01345009	0.15372671	0.0	13	8	5	false	0001100000	8.0	3	0	false	0	200094
38963	5.17171717	0.01416157	0.19335937	0.0	10	8	4	false	0000110000	8.0	4	0	false	0	246897
38964	5.6969697	0.00523461	0.17553191	0.0	11	8	4	false	0000100000	8.0	4	0	false	0	74653
38965	7.65625	0.01609359	0.13061224	0.0	15	8	5	false	1100100000	8.0	3	0	false	0	481769
38966	7.70982143	0.00983092	0.12970469	0.0	16	8	5	false	1010100000	8.0	3	0	false	0	201696
38967	7.09375	0.00623162	0.14096916	0.0	13	8	4	false	1001100000	8.0	4	0	false	0	81915
38968	7.04910714	0.01945261	0.14186194	0.0	13	8	4	false	1000110000	8.0	4	0	false	0	456564
38969	6.5625	0.00432293	0.15238095	0.0	14	8	3	false	1000100000	8.0	5	0	false	0	29351
38970	6.87128713	0.00707409	0.14553314	0.0	13	8	4	false	0111100000	8.0	4	0	false	0	100489
38971	8.01463415	0.00215182	0.12477176	0.0	15	8	4	false	0111000010	8.0	4	0	false	0	12206
38972	7.19902913	0.00125388	0.13890762	0.0	14	8	3	false	0111000000	8.0	5	0	false	0	4367
38973	7.20982143	0.02946606	0.13869969	0.0	13	8	5	false	1111100000	8.0	3	0	false	0	511857
38974	8.62053571	0.02599682	0.11600207	0.0	15	8	5	false	1111000010	8.0	3	0	false	0	455095
38975	1.33333333	0.0013502	0.75	0.0	2	8	6	false	0011000010	8.0	2	0	false	0	2750
38976	1.71428571	0.00271837	0.58333333	0.0	3	8	5	false	0011000000	8.0	3	0	false	0	8123
38977	7.79464286	0.01915735	0.12829324	0.0	14	8	4	false	1111000000	8.0	4	0	false	0	248106
38978	9.51785714	0.02167793	0.10506567	0.0	16	8	5	false	1011000010	8.0	3	0	false	0	305972
38979	8.58482143	0.02179112	0.11648466	0.0	15	8	4	false	1011000000	8.0	4	0	false	0	230434
38980	7.2815534	0.01090352	0.13733333	0.0	14	8	6	false	0101100000	8.0	2	0	false	0	122939
38981	8.38679245	0.00878364	0.1192351	0.0	16	8	6	false	0101000010	8.0	2	0	false	0	94126
38982	9.08035714	0.038782	0.11012783	0.0	16	8	7	false	1101100000	8.0	1	0	false	0	1570334
38983	10.6875	0.03624135	0.09356725	0.0	18	8	7	false	1101000010	8.0	1	0	false	0	2647236
38984	11.66517857	0.01345999	0.08572522	0.0	19	8	7	false	1001000010	8.0	1	0	false	0	1160462
38985	0.0	0.0	0.0	0.0	0	8	8	false	0001000010	8.0	0	0	false	0	0
38986	10.11111111	0.00136779	0.0989011	0.0	18	8	6	false	0110000010	8.0	2	0	false	0	3399
38987	9.0990991	0.00195652	0.10990099	0.0	17	8	5	false	0110000000	8.0	3	0	false	0	4763
38988	12.60714286	0.00358891	0.07932011	0.0	20	8	7	false	1110000010	8.0	1	0	false	0	306552
38989	1.5	0.00178155	0.66666667	0.0	2	8	7	false	0010000010	8.0	1	0	false	0	5828
38990	1.8	0.00334684	0.55555556	0.0	3	8	6	false	0010000000	8.0	2	0	false	0	10413
38991	11.72767857	0.00407928	0.08526837	0.0	19	8	6	false	1110000000	8.0	2	0	false	0	71648
38992	13.49553571	0.00614532	0.07409858	0.0	21	8	6	false	1010000010	8.0	2	0	false	0	458771
38993	12.5	0.00688149	0.08	0.0	20	8	5	false	1010000000	8.0	3	0	false	0	35332
38994	7.60747664	0.00603009	0.13144963	0.0	15	8	5	false	0101000000	8.0	3	0	false	0	29472
38995	9.25233645	0.00462286	0.10808081	0.0	17	8	6	false	0100000010	8.0	2	0	false	0	40782
38996	8.35779817	0.00497932	0.11964874	0.0	16	8	5	false	0100000000	8.0	3	0	false	0	18661
38997	9.89732143	0.02225131	0.10103744	0.0	17	8	6	false	1101000000	8.0	2	0	false	0	422108
38998	11.64732143	0.01344957	0.08585665	0.0	19	8	7	false	1100000010	8.0	1	0	false	0	1169277
38999	10.8125	0.0109725	0.09248555	0.0	18	8	6	false	1100000000	8.0	2	0	false	0	216040
39000	10.84821429	0.00720209	0.09218107	0.0	18	8	6	false	1001000000	8.0	2	0	false	0	108909
39001	12.58035714	0.00953665	0.079489	0.0	20	8	6	false	1000000010	8.0	2	0	false	0	1164709
39002	11.67410714	0.00600509	0.08565966	0.0	19	8	5	false	1000000000	8.0	3	0	false	0	119053
39003	1.0	6.5565E-4	1.0	0.0	1	8	7	false	0001000000	8.0	1	0	false	0	1570
39004	1.0	8.0123E-4	1.0	0.0	1	8	7	false	0000000010	8.0	1	0	false	0	2603
39005	1.33333333	0.00155688	0.75	0.0	2	8	6	false	0000000000	8.0	2	0	false	0	4351
