# Supplementary material
Source: publisher figshare collection journal article supplement (https://springernature.figshare.com/ndownloader/files/17562821)
Supplement: Supplementary file 1 [file 17562821 › CytoscapeSession-2018_09_25-21_15/tables/cytables.xml]

<?xml version="1.0" encoding="UTF-8" standalone="yes"?>
<cyTables>
    <virtualColumns>
        <virtualColumn immutable="false" targetJoinKey="SUID" targetTable="26652-STG%2C+Model+2/LOCAL_ATTRS-org.cytoscape.model.CyNode-STG%2C+Model+2+root+default++node.cytable" sourceJoinKey="SUID" sourceTable="26652-STG%2C+Model+2/SHARED_ATTRS-org.cytoscape.model.CyNode-STG%2C+Model+2+root+shared++node.cytable" sourceColumn="shared name" name="shared name"/>
        <virtualColumn immutable="false" targetJoinKey="SUID" targetTable="21522-STG%2C+Model+3/LOCAL_ATTRS-org.cytoscape.model.CyNetwork-STG%2C+Model+3+default++network.cytable" sourceJoinKey="SUID" sourceTable="21506-STG%2C+Model+3/SHARED_ATTRS-org.cytoscape.model.CyNetwork-STG%2C+Model+3+root+shared++network.cytable" sourceColumn="shared name" name="shared name"/>
        <virtualColumn immutable="false" targetJoinKey="SUID" targetTable="21506-STG%2C+Model+3/LOCAL_ATTRS-org.cytoscape.model.CyNetwork-STG%2C+Model+3+root+default++network.cytable" sourceJoinKey="SUID" sourceTable="21506-STG%2C+Model+3/SHARED_ATTRS-org.cytoscape.model.CyNetwork-STG%2C+Model+3+root+shared++network.cytable" sourceColumn="shared name" name="shared name"/>
        <virtualColumn immutable="false" targetJoinKey="SUID" targetTable="14328-STG%2C+Model+1%2C+Fluctuating+Inputs/LOCAL_ATTRS-org.cytoscape.model.CyNetwork-STG%2C+Model+1%2C+Fluctuating+Inputs+default++network.cytable" sourceJoinKey="SUID" sourceTable="14312-STG%2C+Model+1%2C+Fluctuating+Inputs/SHARED_ATTRS-org.cytoscape.model.CyNetwork-STG%2C+Model+1%2C+Fluctuating+Inputs+root+shared++network.cytable" sourceColumn="shared name" name="shared name"/>
        <virtualColumn immutable="false" targetJoinKey="SUID" targetTable="14328-STG%2C+Model+1%2C+Fluctuating+Inputs/LOCAL_ATTRS-org.cytoscape.model.CyNetwork-STG%2C+Model+1%2C+Fluctuating+Inputs+default++network.cytable" sourceJoinKey="SUID" sourceTable="14312-STG%2C+Model+1%2C+Fluctuating+Inputs/SHARED_ATTRS-org.cytoscape.model.CyNetwork-STG%2C+Model+1%2C+Fluctuating+Inputs+root+shared++network.cytable" sourceColumn="SumInformationLoss" name="SumInformationLoss"/>
        <virtualColumn immutable="false" targetJoinKey="SUID" targetTable="14328-STG%2C+Model+1%2C+Fluctuating+Inputs/LOCAL_ATTRS-org.cytoscape.model.CyNetwork-STG%2C+Model+1%2C+Fluctuating+Inputs+default++network.cytable" sourceJoinKey="SUID" sourceTable="14312-STG%2C+Model+1%2C+Fluctuating+Inputs/SHARED_ATTRS-org.cytoscape.model.CyNetwork-STG%2C+Model+1%2C+Fluctuating+Inputs+root+shared++network.cytable" sourceColumn="NormalizedSumInformationLoss" name="NormalizedSumInformationLoss"/>
        <virtualColumn immutable="false" targetJoinKey="SUID" targetTable="9166-STG%2C+Model+4/LOCAL_ATTRS-org.cytoscape.model.CyNetwork-STG%2C+Model+4+root+default++network.cytable" sourceJoinKey="SUID" sourceTable="9166-STG%2C+Model+4/SHARED_ATTRS-org.cytoscape.model.CyNetwork-STG%2C+Model+4+root+shared++network.cytable" sourceColumn="shared name" name="shared name"/>
        <virtualColumn immutable="false" targetJoinKey="SUID" targetTable="21506-STG%2C+Model+3/LOCAL_ATTRS-org.cytoscape.model.CyEdge-STG%2C+Model+3+root+default++edge.cytable" sourceJoinKey="SUID" sourceTable="21506-STG%2C+Model+3/SHARED_ATTRS-org.cytoscape.model.CyEdge-STG%2C+Model+3+root+shared++edge.cytable" sourceColumn="shared name" name="shared name"/>
        <virtualColumn immutable="false" targetJoinKey="SUID" targetTable="21506-STG%2C+Model+3/LOCAL_ATTRS-org.cytoscape.model.CyEdge-STG%2C+Model+3+root+default++edge.cytable" sourceJoinKey="SUID" sourceTable="21506-STG%2C+Model+3/SHARED_ATTRS-org.cytoscape.model.CyEdge-STG%2C+Model+3+root+shared++edge.cytable" sourceColumn="shared interaction" name="shared interaction"/>
        <virtualColumn immutable="false" targetJoinKey="SUID" targetTable="9182-STG%2C+Model+4/LOCAL_ATTRS-org.cytoscape.model.CyNetwork-STG%2C+Model+4+default++network.cytable" sourceJoinKey="SUID" sourceTable="9166-STG%2C+Model+4/SHARED_ATTRS-org.cytoscape.model.CyNetwork-STG%2C+Model+4+root+shared++network.cytable" sourceColumn="shared name" name="shared name"/>
        <virtualColumn immutable="false" targetJoinKey="SUID" targetTable="21506-STG%2C+Model+3/LOCAL_ATTRS-org.cytoscape.model.CyNode-STG%2C+Model+3+root+default++node.cytable" sourceJoinKey="SUID" sourceTable="21506-STG%2C+Model+3/SHARED_ATTRS-org.cytoscape.model.CyNode-STG%2C+Model+3+root+shared++node.cytable" sourceColumn="shared name" name="shared name"/>
        <virtualColumn immutable="false" targetJoinKey="SUID" targetTable="37972-STG%2C+Model+1/LOCAL_ATTRS-org.cytoscape.model.CyNode-STG%2C+Model+1+default++node.cytable" sourceJoinKey="SUID" sourceTable="37956-STG%2C+Model+1/SHARED_ATTRS-org.cytoscape.model.CyNode-STG%2C+Model+1+root+shared++node.cytable" sourceColumn="shared name" name="shared name"/>
        <virtualColumn immutable="false" targetJoinKey="SUID" targetTable="37972-STG%2C+Model+1/LOCAL_ATTRS-org.cytoscape.model.CyNode-STG%2C+Model+1+default++node.cytable" sourceJoinKey="SUID" sourceTable="37956-STG%2C+Model+1/SHARED_ATTRS-org.cytoscape.model.CyNode-STG%2C+Model+1+root+shared++node.cytable" sourceColumn="Glucose" name="Glucose"/>
        <virtualColumn immutable="false" targetJoinKey="SUID" targetTable="37972-STG%2C+Model+1/LOCAL_ATTRS-org.cytoscape.model.CyNode-STG%2C+Model+1+default++node.cytable" sourceJoinKey="SUID" sourceTable="37956-STG%2C+Model+1/SHARED_ATTRS-org.cytoscape.model.CyNode-STG%2C+Model+1+root+shared++node.cytable" sourceColumn="Pyruvate" name="Pyruvate"/>
        <virtualColumn immutable="false" targetJoinKey="SUID" targetTable="37972-STG%2C+Model+1/LOCAL_ATTRS-org.cytoscape.model.CyNode-STG%2C+Model+1+default++node.cytable" sourceJoinKey="SUID" sourceTable="37956-STG%2C+Model+1/SHARED_ATTRS-org.cytoscape.model.CyNode-STG%2C+Model+1+root+shared++node.cytable" sourceColumn="PDK" name="PDK"/>
        <virtualColumn immutable="false" targetJoinKey="SUID" targetTable="37972-STG%2C+Model+1/LOCAL_ATTRS-org.cytoscape.model.CyNode-STG%2C+Model+1+default++node.cytable" sourceJoinKey="SUID" sourceTable="37956-STG%2C+Model+1/SHARED_ATTRS-org.cytoscape.model.CyNode-STG%2C+Model+1+root+shared++node.cytable" sourceColumn="PDC" name="PDC"/>
        <virtualColumn immutable="false" targetJoinKey="SUID" targetTable="37972-STG%2C+Model+1/LOCAL_ATTRS-org.cytoscape.model.CyNode-STG%2C+Model+1+default++node.cytable" sourceJoinKey="SUID" sourceTable="37956-STG%2C+Model+1/SHARED_ATTRS-org.cytoscape.model.CyNode-STG%2C+Model+1+root+shared++node.cytable" sourceColumn="AcetylCoA" name="AcetylCoA"/>
        <virtualColumn immutable="false" targetJoinKey="SUID" targetTable="37972-STG%2C+Model+1/LOCAL_ATTRS-org.cytoscape.model.CyNode-STG%2C+Model+1+default++node.cytable" sourceJoinKey="SUID" sourceTable="37956-STG%2C+Model+1/SHARED_ATTRS-org.cytoscape.model.CyNode-STG%2C+Model+1+root+shared++node.cytable" sourceColumn="Citrate" name="Citrate"/>
        <virtualColumn immutable="false" targetJoinKey="SUID" targetTable="37972-STG%2C+Model+1/LOCAL_ATTRS-org.cytoscape.model.CyNode-STG%2C+Model+1+default++node.cytable" sourceJoinKey="SUID" sourceTable="37956-STG%2C+Model+1/SHARED_ATTRS-org.cytoscape.model.CyNode-STG%2C+Model+1+root+shared++node.cytable" sourceColumn="MalonylCoA" name="MalonylCoA"/>
        <virtualColumn immutable="false" targetJoinKey="SUID" targetTable="37972-STG%2C+Model+1/LOCAL_ATTRS-org.cytoscape.model.CyNode-STG%2C+Model+1+default++node.cytable" sourceJoinKey="SUID" sourceTable="37956-STG%2C+Model+1/SHARED_ATTRS-org.cytoscape.model.CyNode-STG%2C+Model+1+root+shared++node.cytable" sourceColumn="FattyAcids" name="FattyAcids"/>
        <virtualColumn immutable="false" targetJoinKey="SUID" targetTable="37972-STG%2C+Model+1/LOCAL_ATTRS-org.cytoscape.model.CyNode-STG%2C+Model+1+default++node.cytable" sourceJoinKey="SUID" sourceTable="37956-STG%2C+Model+1/SHARED_ATTRS-org.cytoscape.model.CyNode-STG%2C+Model+1+root+shared++node.cytable" sourceColumn="AMPK" name="AMPK"/>
        <virtualColumn immutable="false" targetJoinKey="SUID" targetTable="37972-STG%2C+Model+1/LOCAL_ATTRS-org.cytoscape.model.CyNode-STG%2C+Model+1+default++node.cytable" sourceJoinKey="SUID" sourceTable="37956-STG%2C+Model+1/SHARED_ATTRS-org.cytoscape.model.CyNode-STG%2C+Model+1+root+shared++node.cytable" sourceColumn="CircFA" name="CircFA"/>
        <virtualColumn immutable="false" targetJoinKey="SUID" targetTable="37956-STG%2C+Model+1/LOCAL_ATTRS-org.cytoscape.model.CyNode-STG%2C+Model+1+root+default++node.cytable" sourceJoinKey="SUID" sourceTable="37956-STG%2C+Model+1/SHARED_ATTRS-org.cytoscape.model.CyNode-STG%2C+Model+1+root+shared++node.cytable" sourceColumn="shared name" name="shared name"/>
        <virtualColumn immutable="false" targetJoinKey="SUID" targetTable="37956-STG%2C+Model+1/LOCAL_ATTRS-org.cytoscape.model.CyNode-STG%2C+Model+1+root+default++node.cytable" sourceJoinKey="SUID" sourceTable="37956-STG%2C+Model+1/SHARED_ATTRS-org.cytoscape.model.CyNode-STG%2C+Model+1+root+shared++node.cytable" sourceColumn="Glucose" name="Glucose"/>
        <virtualColumn immutable="false" targetJoinKey="SUID" targetTable="37956-STG%2C+Model+1/LOCAL_ATTRS-org.cytoscape.model.CyNode-STG%2C+Model+1+root+default++node.cytable" sourceJoinKey="SUID" sourceTable="37956-STG%2C+Model+1/SHARED_ATTRS-org.cytoscape.model.CyNode-STG%2C+Model+1+root+shared++node.cytable" sourceColumn="Pyruvate" name="Pyruvate"/>
        <virtualColumn immutable="false" targetJoinKey="SUID" targetTable="37956-STG%2C+Model+1/LOCAL_ATTRS-org.cytoscape.model.CyNode-STG%2C+Model+1+root+default++node.cytable" sourceJoinKey="SUID" sourceTable="37956-STG%2C+Model+1/SHARED_ATTRS-org.cytoscape.model.CyNode-STG%2C+Model+1+root+shared++node.cytable" sourceColumn="PDK" name="PDK"/>
        <virtualColumn immutable="false" targetJoinKey="SUID" targetTable="37956-STG%2C+Model+1/LOCAL_ATTRS-org.cytoscape.model.CyNode-STG%2C+Model+1+root+default++node.cytable" sourceJoinKey="SUID" sourceTable="37956-STG%2C+Model+1/SHARED_ATTRS-org.cytoscape.model.CyNode-STG%2C+Model+1+root+shared++node.cytable" sourceColumn="PDC" name="PDC"/>
        <virtualColumn immutable="false" targetJoinKey="SUID" targetTable="37956-STG%2C+Model+1/LOCAL_ATTRS-org.cytoscape.model.CyNode-STG%2C+Model+1+root+default++node.cytable" sourceJoinKey="SUID" sourceTable="37956-STG%2C+Model+1/SHARED_ATTRS-org.cytoscape.model.CyNode-STG%2C+Model+1+root+shared++node.cytable" sourceColumn="AcetylCoA" name="AcetylCoA"/>
        <virtualColumn immutable="false" targetJoinKey="SUID" targetTable="37956-STG%2C+Model+1/LOCAL_ATTRS-org.cytoscape.model.CyNode-STG%2C+Model+1+root+default++node.cytable" sourceJoinKey="SUID" sourceTable="37956-STG%2C+Model+1/SHARED_ATTRS-org.cytoscape.model.CyNode-STG%2C+Model+1+root+shared++node.cytable" sourceColumn="Citrate" name="Citrate"/>
        <virtualColumn immutable="false" targetJoinKey="SUID" targetTable="37956-STG%2C+Model+1/LOCAL_ATTRS-org.cytoscape.model.CyNode-STG%2C+Model+1+root+default++node.cytable" sourceJoinKey="SUID" sourceTable="37956-STG%2C+Model+1/SHARED_ATTRS-org.cytoscape.model.CyNode-STG%2C+Model+1+root+shared++node.cytable" sourceColumn="MalonylCoA" name="MalonylCoA"/>
        <virtualColumn immutable="false" targetJoinKey="SUID" targetTable="37956-STG%2C+Model+1/LOCAL_ATTRS-org.cytoscape.model.CyNode-STG%2C+Model+1+root+default++node.cytable" sourceJoinKey="SUID" sourceTable="37956-STG%2C+Model+1/SHARED_ATTRS-org.cytoscape.model.CyNode-STG%2C+Model+1+root+shared++node.cytable" sourceColumn="FattyAcids" name="FattyAcids"/>
        <virtualColumn immutable="false" targetJoinKey="SUID" targetTable="37956-STG%2C+Model+1/LOCAL_ATTRS-org.cytoscape.model.CyNode-STG%2C+Model+1+root+default++node.cytable" sourceJoinKey="SUID" sourceTable="37956-STG%2C+Model+1/SHARED_ATTRS-org.cytoscape.model.CyNode-STG%2C+Model+1+root+shared++node.cytable" sourceColumn="AMPK" name="AMPK"/>
        <virtualColumn immutable="false" targetJoinKey="SUID" targetTable="37956-STG%2C+Model+1/LOCAL_ATTRS-org.cytoscape.model.CyNode-STG%2C+Model+1+root+default++node.cytable" sourceJoinKey="SUID" sourceTable="37956-STG%2C+Model+1/SHARED_ATTRS-org.cytoscape.model.CyNode-STG%2C+Model+1+root+shared++node.cytable" sourceColumn="CircFA" name="CircFA"/>
        <virtualColumn immutable="false" targetJoinKey="SUID" targetTable="9182-STG%2C+Model+4/LOCAL_ATTRS-org.cytoscape.model.CyNode-STG%2C+Model+4+default++node.cytable" sourceJoinKey="SUID" sourceTable="9166-STG%2C+Model+4/SHARED_ATTRS-org.cytoscape.model.CyNode-STG%2C+Model+4+root+shared++node.cytable" sourceColumn="shared name" name="shared name"/>
        <virtualColumn immutable="false" targetJoinKey="SUID" targetTable="37972-STG%2C+Model+1/LOCAL_ATTRS-org.cytoscape.model.CyEdge-STG%2C+Model+1+default++edge.cytable" sourceJoinKey="SUID" sourceTable="37956-STG%2C+Model+1/SHARED_ATTRS-org.cytoscape.model.CyEdge-STG%2C+Model+1+root+shared++edge.cytable" sourceColumn="shared name" name="shared name"/>
        <virtualColumn immutable="false" targetJoinKey="SUID" targetTable="37972-STG%2C+Model+1/LOCAL_ATTRS-org.cytoscape.model.CyEdge-STG%2C+Model+1+default++edge.cytable" sourceJoinKey="SUID" sourceTable="37956-STG%2C+Model+1/SHARED_ATTRS-org.cytoscape.model.CyEdge-STG%2C+Model+1+root+shared++edge.cytable" sourceColumn="shared interaction" name="shared interaction"/>
        <virtualColumn immutable="false" targetJoinKey="SUID" targetTable="9182-STG%2C+Model+4/LOCAL_ATTRS-org.cytoscape.model.CyEdge-STG%2C+Model+4+default++edge.cytable" sourceJoinKey="SUID" sourceTable="9166-STG%2C+Model+4/SHARED_ATTRS-org.cytoscape.model.CyEdge-STG%2C+Model+4+root+shared++edge.cytable" sourceColumn="shared name" name="shared name"/>
        <virtualColumn immutable="false" targetJoinKey="SUID" targetTable="9182-STG%2C+Model+4/LOCAL_ATTRS-org.cytoscape.model.CyEdge-STG%2C+Model+4+default++edge.cytable" sourceJoinKey="SUID" sourceTable="9166-STG%2C+Model+4/SHARED_ATTRS-org.cytoscape.model.CyEdge-STG%2C+Model+4+root+shared++edge.cytable" sourceColumn="shared interaction" name="shared interaction"/>
        <virtualColumn immutable="false" targetJoinKey="SUID" targetTable="9166-STG%2C+Model+4/LOCAL_ATTRS-org.cytoscape.model.CyNode-STG%2C+Model+4+root+default++node.cytable" sourceJoinKey="SUID" sourceTable="9166-STG%2C+Model+4/SHARED_ATTRS-org.cytoscape.model.CyNode-STG%2C+Model+4+root+shared++node.cytable" sourceColumn="shared name" name="shared name"/>
        <virtualColumn immutable="false" targetJoinKey="SUID" targetTable="37956-STG%2C+Model+1/LOCAL_ATTRS-org.cytoscape.model.CyEdge-STG%2C+Model+1+root+default++edge.cytable" sourceJoinKey="SUID" sourceTable="37956-STG%2C+Model+1/SHARED_ATTRS-org.cytoscape.model.CyEdge-STG%2C+Model+1+root+shared++edge.cytable" sourceColumn="shared name" name="shared name"/>
        <virtualColumn immutable="false" targetJoinKey="SUID" targetTable="37956-STG%2C+Model+1/LOCAL_ATTRS-org.cytoscape.model.CyEdge-STG%2C+Model+1+root+default++edge.cytable" sourceJoinKey="SUID" sourceTable="37956-STG%2C+Model+1/SHARED_ATTRS-org.cytoscape.model.CyEdge-STG%2C+Model+1+root+shared++edge.cytable" sourceColumn="shared interaction" name="shared interaction"/>
        <virtualColumn immutable="false" targetJoinKey="SUID" targetTable="26668-STG%2C+Model+2/LOCAL_ATTRS-org.cytoscape.model.CyEdge-STG%2C+Model+2+default++edge.cytable" sourceJoinKey="SUID" sourceTable="26652-STG%2C+Model+2/SHARED_ATTRS-org.cytoscape.model.CyEdge-STG%2C+Model+2+root+shared++edge.cytable" sourceColumn="shared name" name="shared name"/>
        <virtualColumn immutable="false" targetJoinKey="SUID" targetTable="26668-STG%2C+Model+2/LOCAL_ATTRS-org.cytoscape.model.CyEdge-STG%2C+Model+2+default++edge.cytable" sourceJoinKey="SUID" sourceTable="26652-STG%2C+Model+2/SHARED_ATTRS-org.cytoscape.model.CyEdge-STG%2C+Model+2+root+shared++edge.cytable" sourceColumn="shared interaction" name="shared interaction"/>
        <virtualColumn immutable="false" targetJoinKey="SUID" targetTable="37972-STG%2C+Model+1/LOCAL_ATTRS-org.cytoscape.model.CyNetwork-STG%2C+Model+1+default++network.cytable" sourceJoinKey="SUID" sourceTable="37956-STG%2C+Model+1/SHARED_ATTRS-org.cytoscape.model.CyNetwork-STG%2C+Model+1+root+shared++network.cytable" sourceColumn="shared name" name="shared name"/>
        <virtualColumn immutable="false" targetJoinKey="SUID" targetTable="37956-STG%2C+Model+1/LOCAL_ATTRS-org.cytoscape.model.CyNetwork-STG%2C+Model+1+root+default++network.cytable" sourceJoinKey="SUID" sourceTable="37956-STG%2C+Model+1/SHARED_ATTRS-org.cytoscape.model.CyNetwork-STG%2C+Model+1+root+shared++network.cytable" sourceColumn="shared name" name="shared name"/>
        <virtualColumn immutable="false" targetJoinKey="SUID" targetTable="26668-STG%2C+Model+2/LOCAL_ATTRS-org.cytoscape.model.CyNode-STG%2C+Model+2+default++node.cytable" sourceJoinKey="SUID" sourceTable="26652-STG%2C+Model+2/SHARED_ATTRS-org.cytoscape.model.CyNode-STG%2C+Model+2+root+shared++node.cytable" sourceColumn="shared name" name="shared name"/>
        <virtualColumn immutable="false" targetJoinKey="SUID" targetTable="14312-STG%2C+Model+1%2C+Fluctuating+Inputs/LOCAL_ATTRS-org.cytoscape.model.CyNode-STG%2C+Model+1%2C+Fluctuating+Inputs+root+default++node.cytable" sourceJoinKey="SUID" sourceTable="14312-STG%2C+Model+1%2C+Fluctuating+Inputs/SHARED_ATTRS-org.cytoscape.model.CyNode-STG%2C+Model+1%2C+Fluctuating+Inputs+root+shared++node.cytable" sourceColumn="shared name" name="shared name"/>
        <virtualColumn immutable="false" targetJoinKey="SUID" targetTable="14312-STG%2C+Model+1%2C+Fluctuating+Inputs/LOCAL_ATTRS-org.cytoscape.model.CyNode-STG%2C+Model+1%2C+Fluctuating+Inputs+root+default++node.cytable" sourceJoinKey="SUID" sourceTable="14312-STG%2C+Model+1%2C+Fluctuating+Inputs/SHARED_ATTRS-org.cytoscape.model.CyNode-STG%2C+Model+1%2C+Fluctuating+Inputs+root+shared++node.cytable" sourceColumn="Glucose" name="Glucose"/>
        <virtualColumn immutable="false" targetJoinKey="SUID" targetTable="14312-STG%2C+Model+1%2C+Fluctuating+Inputs/LOCAL_ATTRS-org.cytoscape.model.CyNode-STG%2C+Model+1%2C+Fluctuating+Inputs+root+default++node.cytable" sourceJoinKey="SUID" sourceTable="14312-STG%2C+Model+1%2C+Fluctuating+Inputs/SHARED_ATTRS-org.cytoscape.model.CyNode-STG%2C+Model+1%2C+Fluctuating+Inputs+root+shared++node.cytable" sourceColumn="Pyruvate" name="Pyruvate"/>
        <virtualColumn immutable="false" targetJoinKey="SUID" targetTable="14312-STG%2C+Model+1%2C+Fluctuating+Inputs/LOCAL_ATTRS-org.cytoscape.model.CyNode-STG%2C+Model+1%2C+Fluctuating+Inputs+root+default++node.cytable" sourceJoinKey="SUID" sourceTable="14312-STG%2C+Model+1%2C+Fluctuating+Inputs/SHARED_ATTRS-org.cytoscape.model.CyNode-STG%2C+Model+1%2C+Fluctuating+Inputs+root+shared++node.cytable" sourceColumn="PDK" name="PDK"/>
        <virtualColumn immutable="false" targetJoinKey="SUID" targetTable="14312-STG%2C+Model+1%2C+Fluctuating+Inputs/LOCAL_ATTRS-org.cytoscape.model.CyNode-STG%2C+Model+1%2C+Fluctuating+Inputs+root+default++node.cytable" sourceJoinKey="SUID" sourceTable="14312-STG%2C+Model+1%2C+Fluctuating+Inputs/SHARED_ATTRS-org.cytoscape.model.CyNode-STG%2C+Model+1%2C+Fluctuating+Inputs+root+shared++node.cytable" sourceColumn="PDC" name="PDC"/>
        <virtualColumn immutable="false" targetJoinKey="SUID" targetTable="14312-STG%2C+Model+1%2C+Fluctuating+Inputs/LOCAL_ATTRS-org.cytoscape.model.CyNode-STG%2C+Model+1%2C+Fluctuating+Inputs+root+default++node.cytable" sourceJoinKey="SUID" sourceTable="14312-STG%2C+Model+1%2C+Fluctuating+Inputs/SHARED_ATTRS-org.cytoscape.model.CyNode-STG%2C+Model+1%2C+Fluctuating+Inputs+root+shared++node.cytable" sourceColumn="AcetylCoA" name="AcetylCoA"/>
        <virtualColumn immutable="false" targetJoinKey="SUID" targetTable="14312-STG%2C+Model+1%2C+Fluctuating+Inputs/LOCAL_ATTRS-org.cytoscape.model.CyNode-STG%2C+Model+1%2C+Fluctuating+Inputs+root+default++node.cytable" sourceJoinKey="SUID" sourceTable="14312-STG%2C+Model+1%2C+Fluctuating+Inputs/SHARED_ATTRS-org.cytoscape.model.CyNode-STG%2C+Model+1%2C+Fluctuating+Inputs+root+shared++node.cytable" sourceColumn="Citrate" name="Citrate"/>
        <virtualColumn immutable="false" targetJoinKey="SUID" targetTable="14312-STG%2C+Model+1%2C+Fluctuating+Inputs/LOCAL_ATTRS-org.cytoscape.model.CyNode-STG%2C+Model+1%2C+Fluctuating+Inputs+root+default++node.cytable" sourceJoinKey="SUID" sourceTable="14312-STG%2C+Model+1%2C+Fluctuating+Inputs/SHARED_ATTRS-org.cytoscape.model.CyNode-STG%2C+Model+1%2C+Fluctuating+Inputs+root+shared++node.cytable" sourceColumn="MalonylCoA" name="MalonylCoA"/>
        <virtualColumn immutable="false" targetJoinKey="SUID" targetTable="14312-STG%2C+Model+1%2C+Fluctuating+Inputs/LOCAL_ATTRS-org.cytoscape.model.CyNode-STG%2C+Model+1%2C+Fluctuating+Inputs+root+default++node.cytable" sourceJoinKey="SUID" sourceTable="14312-STG%2C+Model+1%2C+Fluctuating+Inputs/SHARED_ATTRS-org.cytoscape.model.CyNode-STG%2C+Model+1%2C+Fluctuating+Inputs+root+shared++node.cytable" sourceColumn="FattyAcids" name="FattyAcids"/>
        <virtualColumn immutable="false" targetJoinKey="SUID" targetTable="14312-STG%2C+Model+1%2C+Fluctuating+Inputs/LOCAL_ATTRS-org.cytoscape.model.CyNode-STG%2C+Model+1%2C+Fluctuating+Inputs+root+default++node.cytable" sourceJoinKey="SUID" sourceTable="14312-STG%2C+Model+1%2C+Fluctuating+Inputs/SHARED_ATTRS-org.cytoscape.model.CyNode-STG%2C+Model+1%2C+Fluctuating+Inputs+root+shared++node.cytable" sourceColumn="AMPK" name="AMPK"/>
        <virtualColumn immutable="false" targetJoinKey="SUID" targetTable="14312-STG%2C+Model+1%2C+Fluctuating+Inputs/LOCAL_ATTRS-org.cytoscape.model.CyNode-STG%2C+Model+1%2C+Fluctuating+Inputs+root+default++node.cytable" sourceJoinKey="SUID" sourceTable="14312-STG%2C+Model+1%2C+Fluctuating+Inputs/SHARED_ATTRS-org.cytoscape.model.CyNode-STG%2C+Model+1%2C+Fluctuating+Inputs+root+shared++node.cytable" sourceColumn="CircFA" name="CircFA"/>
        <virtualColumn immutable="false" targetJoinKey="SUID" targetTable="14312-STG%2C+Model+1%2C+Fluctuating+Inputs/LOCAL_ATTRS-org.cytoscape.model.CyNode-STG%2C+Model+1%2C+Fluctuating+Inputs+root+default++node.cytable" sourceJoinKey="SUID" sourceTable="14312-STG%2C+Model+1%2C+Fluctuating+Inputs/SHARED_ATTRS-org.cytoscape.model.CyNode-STG%2C+Model+1%2C+Fluctuating+Inputs+root+shared++node.cytable" sourceColumn="relEntX" name="relEntX"/>
        <virtualColumn immutable="false" targetJoinKey="SUID" targetTable="14312-STG%2C+Model+1%2C+Fluctuating+Inputs/LOCAL_ATTRS-org.cytoscape.model.CyNode-STG%2C+Model+1%2C+Fluctuating+Inputs+root+default++node.cytable" sourceJoinKey="SUID" sourceTable="14312-STG%2C+Model+1%2C+Fluctuating+Inputs/SHARED_ATTRS-org.cytoscape.model.CyNode-STG%2C+Model+1%2C+Fluctuating+Inputs+root+shared++node.cytable" sourceColumn="relEntY" name="relEntY"/>
        <virtualColumn immutable="false" targetJoinKey="SUID" targetTable="14312-STG%2C+Model+1%2C+Fluctuating+Inputs/LOCAL_ATTRS-org.cytoscape.model.CyNode-STG%2C+Model+1%2C+Fluctuating+Inputs+root+default++node.cytable" sourceJoinKey="SUID" sourceTable="14312-STG%2C+Model+1%2C+Fluctuating+Inputs/SHARED_ATTRS-org.cytoscape.model.CyNode-STG%2C+Model+1%2C+Fluctuating+Inputs+root+shared++node.cytable" sourceColumn="relEntW" name="relEntW"/>
        <virtualColumn immutable="false" targetJoinKey="SUID" targetTable="14312-STG%2C+Model+1%2C+Fluctuating+Inputs/LOCAL_ATTRS-org.cytoscape.model.CyNode-STG%2C+Model+1%2C+Fluctuating+Inputs+root+default++node.cytable" sourceJoinKey="SUID" sourceTable="14312-STG%2C+Model+1%2C+Fluctuating+Inputs/SHARED_ATTRS-org.cytoscape.model.CyNode-STG%2C+Model+1%2C+Fluctuating+Inputs+root+shared++node.cytable" sourceColumn="relEntH" name="relEntH"/>
        <virtualColumn immutable="false" targetJoinKey="SUID" targetTable="14328-STG%2C+Model+1%2C+Fluctuating+Inputs/LOCAL_ATTRS-org.cytoscape.model.CyEdge-STG%2C+Model+1%2C+Fluctuating+Inputs+default++edge.cytable" sourceJoinKey="SUID" sourceTable="14312-STG%2C+Model+1%2C+Fluctuating+Inputs/SHARED_ATTRS-org.cytoscape.model.CyEdge-STG%2C+Model+1%2C+Fluctuating+Inputs+root+shared++edge.cytable" sourceColumn="shared name" name="shared name"/>
        <virtualColumn immutable="false" targetJoinKey="SUID" targetTable="14328-STG%2C+Model+1%2C+Fluctuating+Inputs/LOCAL_ATTRS-org.cytoscape.model.CyEdge-STG%2C+Model+1%2C+Fluctuating+Inputs+default++edge.cytable" sourceJoinKey="SUID" sourceTable="14312-STG%2C+Model+1%2C+Fluctuating+Inputs/SHARED_ATTRS-org.cytoscape.model.CyEdge-STG%2C+Model+1%2C+Fluctuating+Inputs+root+shared++edge.cytable" sourceColumn="shared interaction" name="shared interaction"/>
        <virtualColumn immutable="false" targetJoinKey="SUID" targetTable="21522-STG%2C+Model+3/LOCAL_ATTRS-org.cytoscape.model.CyNode-STG%2C+Model+3+default++node.cytable" sourceJoinKey="SUID" sourceTable="21506-STG%2C+Model+3/SHARED_ATTRS-org.cytoscape.model.CyNode-STG%2C+Model+3+root+shared++node.cytable" sourceColumn="shared name" name="shared name"/>
        <virtualColumn immutable="false" targetJoinKey="SUID" targetTable="21522-STG%2C+Model+3/LOCAL_ATTRS-org.cytoscape.model.CyEdge-STG%2C+Model+3+default++edge.cytable" sourceJoinKey="SUID" sourceTable="21506-STG%2C+Model+3/SHARED_ATTRS-org.cytoscape.model.CyEdge-STG%2C+Model+3+root+shared++edge.cytable" sourceColumn="shared name" name="shared name"/>
        <virtualColumn immutable="false" targetJoinKey="SUID" targetTable="21522-STG%2C+Model+3/LOCAL_ATTRS-org.cytoscape.model.CyEdge-STG%2C+Model+3+default++edge.cytable" sourceJoinKey="SUID" sourceTable="21506-STG%2C+Model+3/SHARED_ATTRS-org.cytoscape.model.CyEdge-STG%2C+Model+3+root+shared++edge.cytable" sourceColumn="shared interaction" name="shared interaction"/>
        <virtualColumn immutable="false" targetJoinKey="SUID" targetTable="26652-STG%2C+Model+2/LOCAL_ATTRS-org.cytoscape.model.CyNetwork-STG%2C+Model+2+root+default++network.cytable" sourceJoinKey="SUID" sourceTable="26652-STG%2C+Model+2/SHARED_ATTRS-org.cytoscape.model.CyNetwork-STG%2C+Model+2+root+shared++network.cytable" sourceColumn="shared name" name="shared name"/>
        <virtualColumn immutable="false" targetJoinKey="SUID" targetTable="14312-STG%2C+Model+1%2C+Fluctuating+Inputs/LOCAL_ATTRS-org.cytoscape.model.CyNetwork-STG%2C+Model+1%2C+Fluctuating+Inputs+root+default++network.cytable" sourceJoinKey="SUID" sourceTable="14312-STG%2C+Model+1%2C+Fluctuating+Inputs/SHARED_ATTRS-org.cytoscape.model.CyNetwork-STG%2C+Model+1%2C+Fluctuating+Inputs+root+shared++network.cytable" sourceColumn="shared name" name="shared name"/>
        <virtualColumn immutable="false" targetJoinKey="SUID" targetTable="14312-STG%2C+Model+1%2C+Fluctuating+Inputs/LOCAL_ATTRS-org.cytoscape.model.CyNetwork-STG%2C+Model+1%2C+Fluctuating+Inputs+root+default++network.cytable" sourceJoinKey="SUID" sourceTable="14312-STG%2C+Model+1%2C+Fluctuating+Inputs/SHARED_ATTRS-org.cytoscape.model.CyNetwork-STG%2C+Model+1%2C+Fluctuating+Inputs+root+shared++network.cytable" sourceColumn="SumInformationLoss" name="SumInformationLoss"/>
        <virtualColumn immutable="false" targetJoinKey="SUID" targetTable="14312-STG%2C+Model+1%2C+Fluctuating+Inputs/LOCAL_ATTRS-org.cytoscape.model.CyNetwork-STG%2C+Model+1%2C+Fluctuating+Inputs+root+default++network.cytable" sourceJoinKey="SUID" sourceTable="14312-STG%2C+Model+1%2C+Fluctuating+Inputs/SHARED_ATTRS-org.cytoscape.model.CyNetwork-STG%2C+Model+1%2C+Fluctuating+Inputs+root+shared++network.cytable" sourceColumn="NormalizedSumInformationLoss" name="NormalizedSumInformationLoss"/>
        <virtualColumn immutable="false" targetJoinKey="SUID" targetTable="9166-STG%2C+Model+4/LOCAL_ATTRS-org.cytoscape.model.CyEdge-STG%2C+Model+4+root+default++edge.cytable" sourceJoinKey="SUID" sourceTable="9166-STG%2C+Model+4/SHARED_ATTRS-org.cytoscape.model.CyEdge-STG%2C+Model+4+root+shared++edge.cytable" sourceColumn="shared name" name="shared name"/>
        <virtualColumn immutable="false" targetJoinKey="SUID" targetTable="9166-STG%2C+Model+4/LOCAL_ATTRS-org.cytoscape.model.CyEdge-STG%2C+Model+4+root+default++edge.cytable" sourceJoinKey="SUID" sourceTable="9166-STG%2C+Model+4/SHARED_ATTRS-org.cytoscape.model.CyEdge-STG%2C+Model+4+root+shared++edge.cytable" sourceColumn="shared interaction" name="shared interaction"/>
        <virtualColumn immutable="false" targetJoinKey="SUID" targetTable="26652-STG%2C+Model+2/LOCAL_ATTRS-org.cytoscape.model.CyEdge-STG%2C+Model+2+root+default++edge.cytable" sourceJoinKey="SUID" sourceTable="26652-STG%2C+Model+2/SHARED_ATTRS-org.cytoscape.model.CyEdge-STG%2C+Model+2+root+shared++edge.cytable" sourceColumn="shared name" name="shared name"/>
        <virtualColumn immutable="false" targetJoinKey="SUID" targetTable="26652-STG%2C+Model+2/LOCAL_ATTRS-org.cytoscape.model.CyEdge-STG%2C+Model+2+root+default++edge.cytable" sourceJoinKey="SUID" sourceTable="26652-STG%2C+Model+2/SHARED_ATTRS-org.cytoscape.model.CyEdge-STG%2C+Model+2+root+shared++edge.cytable" sourceColumn="shared interaction" name="shared interaction"/>
        <virtualColumn immutable="false" targetJoinKey="SUID" targetTable="14328-STG%2C+Model+1%2C+Fluctuating+Inputs/LOCAL_ATTRS-org.cytoscape.model.CyNode-STG%2C+Model+1%2C+Fluctuating+Inputs+default++node.cytable" sourceJoinKey="SUID" sourceTable="14312-STG%2C+Model+1%2C+Fluctuating+Inputs/SHARED_ATTRS-org.cytoscape.model.CyNode-STG%2C+Model+1%2C+Fluctuating+Inputs+root+shared++node.cytable" sourceColumn="shared name" name="shared name"/>
        <virtualColumn immutable="false" targetJoinKey="SUID" targetTable="14328-STG%2C+Model+1%2C+Fluctuating+Inputs/LOCAL_ATTRS-org.cytoscape.model.CyNode-STG%2C+Model+1%2C+Fluctuating+Inputs+default++node.cytable" sourceJoinKey="SUID" sourceTable="14312-STG%2C+Model+1%2C+Fluctuating+Inputs/SHARED_ATTRS-org.cytoscape.model.CyNode-STG%2C+Model+1%2C+Fluctuating+Inputs+root+shared++node.cytable" sourceColumn="Glucose" name="Glucose"/>
        <virtualColumn immutable="false" targetJoinKey="SUID" targetTable="14328-STG%2C+Model+1%2C+Fluctuating+Inputs/LOCAL_ATTRS-org.cytoscape.model.CyNode-STG%2C+Model+1%2C+Fluctuating+Inputs+default++node.cytable" sourceJoinKey="SUID" sourceTable="14312-STG%2C+Model+1%2C+Fluctuating+Inputs/SHARED_ATTRS-org.cytoscape.model.CyNode-STG%2C+Model+1%2C+Fluctuating+Inputs+root+shared++node.cytable" sourceColumn="Pyruvate" name="Pyruvate"/>
        <virtualColumn immutable="false" targetJoinKey="SUID" targetTable="14328-STG%2C+Model+1%2C+Fluctuating+Inputs/LOCAL_ATTRS-org.cytoscape.model.CyNode-STG%2C+Model+1%2C+Fluctuating+Inputs+default++node.cytable" sourceJoinKey="SUID" sourceTable="14312-STG%2C+Model+1%2C+Fluctuating+Inputs/SHARED_ATTRS-org.cytoscape.model.CyNode-STG%2C+Model+1%2C+Fluctuating+Inputs+root+shared++node.cytable" sourceColumn="PDK" name="PDK"/>
        <virtualColumn immutable="false" targetJoinKey="SUID" targetTable="14328-STG%2C+Model+1%2C+Fluctuating+Inputs/LOCAL_ATTRS-org.cytoscape.model.CyNode-STG%2C+Model+1%2C+Fluctuating+Inputs+default++node.cytable" sourceJoinKey="SUID" sourceTable="14312-STG%2C+Model+1%2C+Fluctuating+Inputs/SHARED_ATTRS-org.cytoscape.model.CyNode-STG%2C+Model+1%2C+Fluctuating+Inputs+root+shared++node.cytable" sourceColumn="PDC" name="PDC"/>
        <virtualColumn immutable="false" targetJoinKey="SUID" targetTable="14328-STG%2C+Model+1%2C+Fluctuating+Inputs/LOCAL_ATTRS-org.cytoscape.model.CyNode-STG%2C+Model+1%2C+Fluctuating+Inputs+default++node.cytable" sourceJoinKey="SUID" sourceTable="14312-STG%2C+Model+1%2C+Fluctuating+Inputs/SHARED_ATTRS-org.cytoscape.model.CyNode-STG%2C+Model+1%2C+Fluctuating+Inputs+root+shared++node.cytable" sourceColumn="AcetylCoA" name="AcetylCoA"/>
        <virtualColumn immutable="false" targetJoinKey="SUID" targetTable="14328-STG%2C+Model+1%2C+Fluctuating+Inputs/LOCAL_ATTRS-org.cytoscape.model.CyNode-STG%2C+Model+1%2C+Fluctuating+Inputs+default++node.cytable" sourceJoinKey="SUID" sourceTable="14312-STG%2C+Model+1%2C+Fluctuating+Inputs/SHARED_ATTRS-org.cytoscape.model.CyNode-STG%2C+Model+1%2C+Fluctuating+Inputs+root+shared++node.cytable" sourceColumn="Citrate" name="Citrate"/>
        <virtualColumn immutable="false" targetJoinKey="SUID" targetTable="14328-STG%2C+Model+1%2C+Fluctuating+Inputs/LOCAL_ATTRS-org.cytoscape.model.CyNode-STG%2C+Model+1%2C+Fluctuating+Inputs+default++node.cytable" sourceJoinKey="SUID" sourceTable="14312-STG%2C+Model+1%2C+Fluctuating+Inputs/SHARED_ATTRS-org.cytoscape.model.CyNode-STG%2C+Model+1%2C+Fluctuating+Inputs+root+shared++node.cytable" sourceColumn="MalonylCoA" name="MalonylCoA"/>
        <virtualColumn immutable="false" targetJoinKey="SUID" targetTable="14328-STG%2C+Model+1%2C+Fluctuating+Inputs/LOCAL_ATTRS-org.cytoscape.model.CyNode-STG%2C+Model+1%2C+Fluctuating+Inputs+default++node.cytable" sourceJoinKey="SUID" sourceTable="14312-STG%2C+Model+1%2C+Fluctuating+Inputs/SHARED_ATTRS-org.cytoscape.model.CyNode-STG%2C+Model+1%2C+Fluctuating+Inputs+root+shared++node.cytable" sourceColumn="FattyAcids" name="FattyAcids"/>
        <virtualColumn immutable="false" targetJoinKey="SUID" targetTable="14328-STG%2C+Model+1%2C+Fluctuating+Inputs/LOCAL_ATTRS-org.cytoscape.model.CyNode-STG%2C+Model+1%2C+Fluctuating+Inputs+default++node.cytable" sourceJoinKey="SUID" sourceTable="14312-STG%2C+Model+1%2C+Fluctuating+Inputs/SHARED_ATTRS-org.cytoscape.model.CyNode-STG%2C+Model+1%2C+Fluctuating+Inputs+root+shared++node.cytable" sourceColumn="AMPK" name="AMPK"/>
        <virtualColumn immutable="false" targetJoinKey="SUID" targetTable="14328-STG%2C+Model+1%2C+Fluctuating+Inputs/LOCAL_ATTRS-org.cytoscape.model.CyNode-STG%2C+Model+1%2C+Fluctuating+Inputs+default++node.cytable" sourceJoinKey="SUID" sourceTable="14312-STG%2C+Model+1%2C+Fluctuating+Inputs/SHARED_ATTRS-org.cytoscape.model.CyNode-STG%2C+Model+1%2C+Fluctuating+Inputs+root+shared++node.cytable" sourceColumn="CircFA" name="CircFA"/>
        <virtualColumn immutable="false" targetJoinKey="SUID" targetTable="14328-STG%2C+Model+1%2C+Fluctuating+Inputs/LOCAL_ATTRS-org.cytoscape.model.CyNode-STG%2C+Model+1%2C+Fluctuating+Inputs+default++node.cytable" sourceJoinKey="SUID" sourceTable="14312-STG%2C+Model+1%2C+Fluctuating+Inputs/SHARED_ATTRS-org.cytoscape.model.CyNode-STG%2C+Model+1%2C+Fluctuating+Inputs+root+shared++node.cytable" sourceColumn="relEntX" name="relEntX"/>
        <virtualColumn immutable="false" targetJoinKey="SUID" targetTable="14328-STG%2C+Model+1%2C+Fluctuating+Inputs/LOCAL_ATTRS-org.cytoscape.model.CyNode-STG%2C+Model+1%2C+Fluctuating+Inputs+default++node.cytable" sourceJoinKey="SUID" sourceTable="14312-STG%2C+Model+1%2C+Fluctuating+Inputs/SHARED_ATTRS-org.cytoscape.model.CyNode-STG%2C+Model+1%2C+Fluctuating+Inputs+root+shared++node.cytable" sourceColumn="relEntY" name="relEntY"/>
        <virtualColumn immutable="false" targetJoinKey="SUID" targetTable="14328-STG%2C+Model+1%2C+Fluctuating+Inputs/LOCAL_ATTRS-org.cytoscape.model.CyNode-STG%2C+Model+1%2C+Fluctuating+Inputs+default++node.cytable" sourceJoinKey="SUID" sourceTable="14312-STG%2C+Model+1%2C+Fluctuating+Inputs/SHARED_ATTRS-org.cytoscape.model.CyNode-STG%2C+Model+1%2C+Fluctuating+Inputs+root+shared++node.cytable" sourceColumn="relEntW" name="relEntW"/>
        <virtualColumn immutable="false" targetJoinKey="SUID" targetTable="14328-STG%2C+Model+1%2C+Fluctuating+Inputs/LOCAL_ATTRS-org.cytoscape.model.CyNode-STG%2C+Model+1%2C+Fluctuating+Inputs+default++node.cytable" sourceJoinKey="SUID" sourceTable="14312-STG%2C+Model+1%2C+Fluctuating+Inputs/SHARED_ATTRS-org.cytoscape.model.CyNode-STG%2C+Model+1%2C+Fluctuating+Inputs+root+shared++node.cytable" sourceColumn="relEntH" name="relEntH"/>
        <virtualColumn immutable="false" targetJoinKey="SUID" targetTable="26668-STG%2C+Model+2/LOCAL_ATTRS-org.cytoscape.model.CyNetwork-STG%2C+Model+2+default++network.cytable" sourceJoinKey="SUID" sourceTable="26652-STG%2C+Model+2/SHARED_ATTRS-org.cytoscape.model.CyNetwork-STG%2C+Model+2+root+shared++network.cytable" sourceColumn="shared name" name="shared name"/>
        <virtualColumn immutable="false" targetJoinKey="SUID" targetTable="14312-STG%2C+Model+1%2C+Fluctuating+Inputs/LOCAL_ATTRS-org.cytoscape.model.CyEdge-STG%2C+Model+1%2C+Fluctuating+Inputs+root+default++edge.cytable" sourceJoinKey="SUID" sourceTable="14312-STG%2C+Model+1%2C+Fluctuating+Inputs/SHARED_ATTRS-org.cytoscape.model.CyEdge-STG%2C+Model+1%2C+Fluctuating+Inputs+root+shared++edge.cytable" sourceColumn="shared name" name="shared name"/>
        <virtualColumn immutable="false" targetJoinKey="SUID" targetTable="14312-STG%2C+Model+1%2C+Fluctuating+Inputs/LOCAL_ATTRS-org.cytoscape.model.CyEdge-STG%2C+Model+1%2C+Fluctuating+Inputs+root+default++edge.cytable" sourceJoinKey="SUID" sourceTable="14312-STG%2C+Model+1%2C+Fluctuating+Inputs/SHARED_ATTRS-org.cytoscape.model.CyEdge-STG%2C+Model+1%2C+Fluctuating+Inputs+root+shared++edge.cytable" sourceColumn="shared interaction" name="shared interaction"/>
    </virtualColumns>
</cyTables>
