# Supplementary material
Source: publisher figshare collection journal article supplement (https://springernature.figshare.com/ndownloader/files/17562821)
Supplement: Supplementary file 1 [file 17562821 › CytoscapeSession-2018_09_25-21_15/views/9182-80115-STG%2C+Model+4.xgmml]

<?xml version="1.0" encoding="UTF-8" standalone="yes"?>
<graph id="80115" label="STG, Model 4" cy:view="1" cy:networkId="9182" cy:visualStyle="Directed" cy:rendererId="org.cytoscape.ding" cy:documentVersion="3.0" xmlns:dc="http://purl.org/dc/elements/1.1/" xmlns:xlink="http://www.w3.org/1999/xlink" xmlns:rdf="http://www.w3.org/1999/02/22-rdf-syntax-ns#" xmlns:cy="http://www.cytoscape.org" xmlns="http://www.cs.rpi.edu/XGMML">
  <graphics>
    <att name="NETWORK_TITLE" value="STG, Model 4" type="string" cy:type="String"/>
    <att name="NETWORK_EDGE_SELECTION" value="true" type="string" cy:type="String"/>
    <att name="NETWORK_WIDTH" value="1193.0" type="string" cy:type="String"/>
    <att name="NETWORK_NODE_SELECTION" value="true" type="string" cy:type="String"/>
    <att name="NETWORK_CENTER_Z_LOCATION" value="0.0" type="string" cy:type="String"/>
    <att name="NETWORK_CENTER_X_LOCATION" value="-12.2056884765625" type="string" cy:type="String"/>
    <att name="NETWORK_SCALE_FACTOR" value="0.4248282210644546" type="string" cy:type="String"/>
    <att name="NETWORK_DEPTH" value="0.0" type="string" cy:type="String"/>
    <att name="NETWORK_HEIGHT" value="501.0" type="string" cy:type="String"/>
    <att name="NETWORK_CENTER_Y_LOCATION" value="9.242202758789062" type="string" cy:type="String"/>
  </graphics>
  <node id="81140" label="0111111111" cy:nodeId="9192">
    <graphics z="0.0" y="-319.94481702160556" x="-1357.8085234186146"/>
  </node>
  <node id="81139" label="1111111111" cy:nodeId="9193">
    <graphics z="0.0" y="-119.59136243176181" x="1600.3425843694713"/>
  </node>
  <node id="81138" label="0011111111" cy:nodeId="9194">
    <graphics z="0.0" y="-375.45186658215243" x="-1362.945104839513"/>
  </node>
  <node id="81137" label="1011111111" cy:nodeId="9195">
    <graphics z="0.0" y="-206.91326947521884" x="1582.3518922307994"/>
  </node>
  <node id="81136" label="0101111111" cy:nodeId="9196">
    <graphics z="0.0" y="-122.92913480114657" x="-1315.528845073888"/>
  </node>
  <node id="81135" label="1101111111" cy:nodeId="9197">
    <graphics z="0.0" y="-120.683937505004" x="1535.7265870550182"/>
  </node>
  <node id="81134" label="0001111111" cy:nodeId="9198">
    <graphics z="0.0" y="-175.10555310558993" x="-1439.6258757135365"/>
  </node>
  <node id="81133" label="1001111111" cy:nodeId="9199">
    <graphics z="0.0" y="-167.45723767590243" x="1362.3626191595104"/>
  </node>
  <node id="81132" label="0110111111" cy:nodeId="9200">
    <graphics z="0.0" y="-324.77538342785556" x="-1145.501311542699"/>
  </node>
  <node id="81131" label="1110111111" cy:nodeId="9201">
    <graphics z="0.0" y="-274.0477299244376" x="1513.0867707708385"/>
  </node>
  <node id="81130" label="0010111111" cy:nodeId="9202">
    <graphics z="0.0" y="-317.46613354992587" x="-1220.8269712945912"/>
  </node>
  <node id="81129" label="1010111111" cy:nodeId="9203">
    <graphics z="0.0" y="-239.33742566418368" x="1338.1966721990611"/>
  </node>
  <node id="81128" label="0100111111" cy:nodeId="9204">
    <graphics z="0.0" y="-169.50061841320712" x="-1235.0919249078725"/>
  </node>
  <node id="81127" label="1100111111" cy:nodeId="9205">
    <graphics z="0.0" y="-255.40495724987704" x="1413.6981770971324"/>
  </node>
  <node id="81126" label="0000111111" cy:nodeId="9206">
    <graphics z="0.0" y="-158.7583012135001" x="-1327.969763042638"/>
  </node>
  <node id="81125" label="1000111111" cy:nodeId="9207">
    <graphics z="0.0" y="-216.94841046642978" x="1220.4445130804088"/>
  </node>
  <node id="81124" label="0111111011" cy:nodeId="9208">
    <graphics z="0.0" y="-217.548683598754" x="-1333.4071409723256"/>
  </node>
  <node id="81123" label="0111101111" cy:nodeId="9209">
    <graphics z="0.0" y="-154.2781986744376" x="-1186.268705608556"/>
  </node>
  <node id="81122" label="1111111011" cy:nodeId="9210">
    <graphics z="0.0" y="-229.66604657482821" x="1477.5530946233775"/>
  </node>
  <node id="81121" label="1111101111" cy:nodeId="9211">
    <graphics z="0.0" y="-339.0913090260001" x="1503.6240479925182"/>
  </node>
  <node id="81120" label="1011111011" cy:nodeId="9212">
    <graphics z="0.0" y="-139.21759839367587" x="1441.6218030431774"/>
  </node>
  <node id="81119" label="1011101111" cy:nodeId="9213">
    <graphics z="0.0" y="-331.4434818775626" x="1395.8030011632945"/>
  </node>
  <node id="81118" label="0011111011" cy:nodeId="9214">
    <graphics z="0.0" y="-283.7722401173087" x="-1355.3209745904896"/>
  </node>
  <node id="81117" label="0011101111" cy:nodeId="9215">
    <graphics z="0.0" y="-247.09076733898837" x="-1468.0540068170521"/>
  </node>
  <node id="81116" label="0101111011" cy:nodeId="9216">
    <graphics z="0.0" y="113.13384203601163" x="-1308.9376738092396"/>
  </node>
  <node id="81115" label="0101101111" cy:nodeId="9217">
    <graphics z="0.0" y="128.08841662097257" x="-1196.2693312189076"/>
  </node>
  <node id="81114" label="1101111011" cy:nodeId="9218">
    <graphics z="0.0" y="-239.9780811817618" x="1319.541238544276"/>
  </node>
  <node id="81113" label="1101101111" cy:nodeId="9219">
    <graphics z="0.0" y="-366.3646244556876" x="1467.4027764776256"/>
  </node>
  <node id="81112" label="1011101011" cy:nodeId="9220">
    <graphics z="0.0" y="-173.2462696583243" x="1247.8738038518932"/>
  </node>
  <node id="81111" label="1001111011" cy:nodeId="9221">
    <graphics z="0.0" y="-178.71483655285556" x="1155.5867097356822"/>
  </node>
  <node id="81110" label="1001101111" cy:nodeId="9222">
    <graphics z="0.0" y="-374.3525929005118" x="1305.7488038518932"/>
  </node>
  <node id="81109" label="0011101011" cy:nodeId="9223">
    <graphics z="0.0" y="-81.0646633655997" x="-1301.366720440099"/>
  </node>
  <node id="81108" label="0001111011" cy:nodeId="9224">
    <graphics z="0.0" y="-46.045196965453215" x="-1255.5363447687123"/>
  </node>
  <node id="81107" label="0001101111" cy:nodeId="9225">
    <graphics z="0.0" y="70.26056627917569" x="-1395.6150724908803"/>
  </node>
  <node id="81106" label="0111011111" cy:nodeId="9226">
    <graphics z="0.0" y="-110.21898885082919" x="-1450.795919658849"/>
  </node>
  <node id="81105" label="1111011111" cy:nodeId="9227">
    <graphics z="0.0" y="-35.86345715832431" x="1710.399636981776"/>
  </node>
  <node id="81104" label="1011011111" cy:nodeId="9228">
    <graphics z="0.0" y="-67.15981335949618" x="1535.2175462224986"/>
  </node>
  <node id="81103" label="0011011111" cy:nodeId="9229">
    <graphics z="0.0" y="-294.95723767590243" x="-1525.5469877740834"/>
  </node>
  <node id="81102" label="0110111011" cy:nodeId="9230">
    <graphics z="0.0" y="-81.6385330707999" x="-1085.278684856603"/>
  </node>
  <node id="81101" label="0110101111" cy:nodeId="9231">
    <graphics z="0.0" y="-242.04653210949618" x="-1048.0514662286732"/>
  </node>
  <node id="81100" label="0110101011" cy:nodeId="9232">
    <graphics z="0.0" y="-18.38373608898837" x="-1025.328405620763"/>
  </node>
  <node id="81099" label="1110111011" cy:nodeId="9233">
    <graphics z="0.0" y="-218.6550297291251" x="1376.373960254481"/>
  </node>
  <node id="81098" label="1110101111" cy:nodeId="9234">
    <graphics z="0.0" y="-366.9014744312735" x="1419.5215222814586"/>
  </node>
  <node id="81097" label="1110101011" cy:nodeId="9235">
    <graphics z="0.0" y="-290.39215894055087" x="1280.8377473333385"/>
  </node>
  <node id="81096" label="1010111011" cy:nodeId="9236">
    <graphics z="0.0" y="-151.12525220226962" x="1265.9951722600963"/>
  </node>
  <node id="81095" label="1010101111" cy:nodeId="9237">
    <graphics z="0.0" y="-315.09442754101474" x="1223.084481952479"/>
  </node>
  <node id="81094" label="0010111011" cy:nodeId="9238">
    <graphics z="0.0" y="-150.02174420666415" x="-1209.5057203790639"/>
  </node>
  <node id="81093" label="0010101111" cy:nodeId="9239">
    <graphics z="0.0" y="-172.49147076916415" x="-1166.6376936456654"/>
  </node>
  <node id="81092" label="0101011111" cy:nodeId="9240">
    <graphics z="0.0" y="47.440894648316316" x="-1440.168234111974"/>
  </node>
  <node id="81091" label="1101011111" cy:nodeId="9241">
    <graphics z="0.0" y="-48.49504895519931" x="1594.7886750677135"/>
  </node>
  <node id="81090" label="0111110111" cy:nodeId="9242">
    <graphics z="0.0" y="-133.33807416271884" x="-1280.7489225885365"/>
  </node>
  <node id="81089" label="1111110111" cy:nodeId="9243">
    <graphics z="0.0" y="-68.31971021008212" x="1648.551995990565"/>
  </node>
  <node id="81088" label="1001011111" cy:nodeId="9244">
    <graphics z="0.0" y="43.77759508776944" x="1317.727060077479"/>
  </node>
  <node id="81087" label="0001011111" cy:nodeId="9245">
    <graphics z="0.0" y="-147.11289639782626" x="-1522.2032377740834"/>
  </node>
  <node id="81086" label="0011110111" cy:nodeId="9246">
    <graphics z="0.0" y="-211.49160046887118" x="-1343.6616728326771"/>
  </node>
  <node id="81085" label="1011110111" cy:nodeId="9247">
    <graphics z="0.0" y="-55.033958867308684" x="1490.8115861394908"/>
  </node>
  <node id="81084" label="0100111011" cy:nodeId="9248">
    <graphics z="0.0" y="188.99753527331632" x="-1098.1245672723744"/>
  </node>
  <node id="81083" label="0100101111" cy:nodeId="9249">
    <graphics z="0.0" y="81.35428576159757" x="-1049.5192472955678"/>
  </node>
  <node id="81082" label="0100101011" cy:nodeId="9250">
    <graphics z="0.0" y="137.35970263171475" x="-980.2834074518178"/>
  </node>
  <node id="81081" label="1100111011" cy:nodeId="9251">
    <graphics z="0.0" y="-61.98864026379306" x="1242.909387347987"/>
  </node>
  <node id="81080" label="1100101111" cy:nodeId="9252">
    <graphics z="0.0" y="-375.45186658215243" x="1276.7404115179088"/>
  </node>
  <node id="81079" label="1100101011" cy:nodeId="9253">
    <graphics z="0.0" y="-187.11288495373446" x="1207.047128436854"/>
  </node>
  <node id="81078" label="1010101011" cy:nodeId="9254">
    <graphics z="0.0" y="-276.5349888355704" x="1151.5446259954479"/>
  </node>
  <node id="81077" label="1001101011" cy:nodeId="9255">
    <graphics z="0.0" y="-351.0927166492911" x="1123.554452655604"/>
  </node>
  <node id="81076" label="1000111011" cy:nodeId="9256">
    <graphics z="0.0" y="40.125892206910066" x="1148.1999909856822"/>
  </node>
  <node id="81075" label="1000101111" cy:nodeId="9257">
    <graphics z="0.0" y="-366.38295026135165" x="1134.2110688665416"/>
  </node>
  <node id="81074" label="1000101011" cy:nodeId="9258">
    <graphics z="0.0" y="-251.57755322766025" x="1042.0123078802135"/>
  </node>
  <node id="81073" label="0010101011" cy:nodeId="9259">
    <graphics z="0.0" y="-187.3022007496329" x="-1071.0149366876576"/>
  </node>
  <node id="81072" label="0001101011" cy:nodeId="9260">
    <graphics z="0.0" y="218.04627184558194" x="-1250.3558104059193"/>
  </node>
  <node id="81071" label="0000111011" cy:nodeId="9261">
    <graphics z="0.0" y="-78.93303246807773" x="-1040.6651365777943"/>
  </node>
  <node id="81070" label="0000101111" cy:nodeId="9262">
    <graphics z="0.0" y="8.577651545288973" x="-1161.5536711236928"/>
  </node>
  <node id="81069" label="0000101011" cy:nodeId="9263">
    <graphics z="0.0" y="76.27851061511319" x="-1116.3972666284535"/>
  </node>
  <node id="81068" label="0101110111" cy:nodeId="9264">
    <graphics z="0.0" y="83.36359362292569" x="-1337.4888823053334"/>
  </node>
  <node id="81067" label="0110011111" cy:nodeId="9265">
    <graphics z="0.0" y="-108.09623189282138" x="-1188.915418865392"/>
  </node>
  <node id="81066" label="1101110111" cy:nodeId="9266">
    <graphics z="0.0" y="-137.4748310596915" x="1545.5319688299205"/>
  </node>
  <node id="81065" label="1110011111" cy:nodeId="9267">
    <graphics z="0.0" y="-90.98720593762118" x="1524.90868544369"/>
  </node>
  <node id="81064" label="0001110111" cy:nodeId="9268">
    <graphics z="0.0" y="12.415328547242098" x="-1334.4488585016225"/>
  </node>
  <node id="81063" label="1111101011" cy:nodeId="9269">
    <graphics z="0.0" y="-312.80754514050204" x="1467.9111802557018"/>
  </node>
  <node id="81062" label="1001110111" cy:nodeId="9270">
    <graphics z="0.0" y="15.741584345581941" x="1361.1130769231822"/>
  </node>
  <node id="81061" label="1010011111" cy:nodeId="9271">
    <graphics z="0.0" y="-130.05231519055087" x="1475.912202594569"/>
  </node>
  <node id="81060" label="0111101011" cy:nodeId="9272">
    <graphics z="0.0" y="55.598121210816316" x="-1203.1921904108021"/>
  </node>
  <node id="81059" label="0010011111" cy:nodeId="9273">
    <graphics z="0.0" y="-348.25341077160556" x="-1380.2603056451771"/>
  </node>
  <node id="81058" label="0100011111" cy:nodeId="9274">
    <graphics z="0.0" y="60.885291620972566" x="-1340.1705381891225"/>
  </node>
  <node id="81057" label="1100011111" cy:nodeId="9275">
    <graphics z="0.0" y="-124.31432385754306" x="1417.9738652685191"/>
  </node>
  <node id="81056" label="0101101011" cy:nodeId="9276">
    <graphics z="0.0" y="200.43576769519132" x="-1085.7844679376576"/>
  </node>
  <node id="81055" label="1110110111" cy:nodeId="9277">
    <graphics z="0.0" y="-216.3164600880118" x="1450.5898702123668"/>
  </node>
  <node id="81054" label="0110110111" cy:nodeId="9278">
    <graphics z="0.0" y="-87.70368237805087" x="-1097.3065550348256"/>
  </node>
  <node id="81053" label="1101101011" cy:nodeId="9279">
    <graphics z="0.0" y="-365.5921711475821" x="1317.853036639979"/>
  </node>
  <node id="81052" label="1000011111" cy:nodeId="9280">
    <graphics z="0.0" y="-130.62911267590243" x="1296.129647968104"/>
  </node>
  <node id="81051" label="0000011111" cy:nodeId="9281">
    <graphics z="0.0" y="-133.91725201916415" x="-1378.8466551324818"/>
  </node>
  <node id="81050" label="0010110111" cy:nodeId="9282">
    <graphics z="0.0" y="-192.36916394543368" x="-1102.6049273035023"/>
  </node>
  <node id="81049" label="1010110111" cy:nodeId="9283">
    <graphics z="0.0" y="45.216468378785066" x="1315.8633515813854"/>
  </node>
  <node id="81048" label="0100110111" cy:nodeId="9284">
    <graphics z="0.0" y="8.972930475953035" x="-1050.0526716730092"/>
  </node>
  <node id="81047" label="1100110111" cy:nodeId="9285">
    <graphics z="0.0" y="-172.9119190723868" x="1320.6282594182994"/>
  </node>
  <node id="81046" label="0000110111" cy:nodeId="9286">
    <graphics z="0.0" y="17.56983141589444" x="-1263.106207134435"/>
  </node>
  <node id="81045" label="1000110111" cy:nodeId="9287">
    <graphics z="0.0" y="-58.37274976086337" x="1262.7593018987682"/>
  </node>
  <node id="81044" label="0111001111" cy:nodeId="9288">
    <graphics z="0.0" y="50.651755854371004" x="-1195.912275554845"/>
  </node>
  <node id="81043" label="1111001111" cy:nodeId="9289">
    <graphics z="0.0" y="-181.69871564221103" x="1686.9903047063854"/>
  </node>
  <node id="81042" label="1011001111" cy:nodeId="9290">
    <graphics z="0.0" y="-167.536232426879" x="1567.4492890813854"/>
  </node>
  <node id="81041" label="0011001111" cy:nodeId="9291">
    <graphics z="0.0" y="-47.31286664318759" x="-1395.6778166315053"/>
  </node>
  <node id="81040" label="0101001111" cy:nodeId="9292">
    <graphics z="0.0" y="232.56894640612882" x="-1447.0454618951771"/>
  </node>
  <node id="81039" label="1101001111" cy:nodeId="9293">
    <graphics z="0.0" y="-167.33307690930087" x="1443.379846332362"/>
  </node>
  <node id="81038" label="1111110011" cy:nodeId="9294">
    <graphics z="0.0" y="-54.751121953246184" x="1477.7838113286998"/>
  </node>
  <node id="81037" label="1111100111" cy:nodeId="9295">
    <graphics z="0.0" y="-207.81979413342196" x="1513.474130389979"/>
  </node>
  <node id="81036" label="1001001111" cy:nodeId="9296">
    <graphics z="0.0" y="-304.23069997143466" x="1372.1268098333385"/>
  </node>
  <node id="81035" label="0001001111" cy:nodeId="9297">
    <graphics z="0.0" y="98.54015307116788" x="-1351.76172471256"/>
  </node>
  <node id="81034" label="0111110011" cy:nodeId="9298">
    <graphics z="0.0" y="-36.20158429455478" x="-1150.5860121271107"/>
  </node>
  <node id="81033" label="0111100111" cy:nodeId="9299">
    <graphics z="0.0" y="45.88465075183194" x="-1124.984245540807"/>
  </node>
  <node id="81032" label="1011110011" cy:nodeId="9300">
    <graphics z="0.0" y="104.79758410144132" x="1363.8680818059947"/>
  </node>
  <node id="81031" label="1011100111" cy:nodeId="9301">
    <graphics z="0.0" y="-195.4969486744376" x="1500.249719379237"/>
  </node>
  <node id="81030" label="0011110011" cy:nodeId="9302">
    <graphics z="0.0" y="-203.3269810230704" x="-1236.3571302911732"/>
  </node>
  <node id="81029" label="0011100111" cy:nodeId="9303">
    <graphics z="0.0" y="-37.005768254515715" x="-1294.0110380670521"/>
  </node>
  <node id="81028" label="1011101110" cy:nodeId="9304">
    <graphics z="0.0" y="-6.010464146849699" x="-267.6675932428334"/>
  </node>
  <node id="81027" label="0011101110" cy:nodeId="9305">
    <graphics z="0.0" y="177.51889757800382" x="370.58926176815294"/>
  </node>
  <node id="81026" label="0111111101" cy:nodeId="9306">
    <graphics z="0.0" y="-180.49518628430087" x="-1329.7205107233021"/>
  </node>
  <node id="81025" label="1111111101" cy:nodeId="9307">
    <graphics z="0.0" y="51.69904284167569" x="1579.7730500677135"/>
  </node>
  <node id="81024" label="0101110011" cy:nodeId="9308">
    <graphics z="0.0" y="162.38831286120694" x="-1127.8714640161488"/>
  </node>
  <node id="81023" label="0101100111" cy:nodeId="9309">
    <graphics z="0.0" y="167.4664988963632" x="-1202.2363111993764"/>
  </node>
  <node id="81022" label="0110001111" cy:nodeId="9310">
    <graphics z="0.0" y="-83.94023366284091" x="-1251.114294292638"/>
  </node>
  <node id="81021" label="1011111101" cy:nodeId="9311">
    <graphics z="0.0" y="110.71466784167569" x="1516.430757282069"/>
  </node>
  <node id="81020" label="0011111101" cy:nodeId="9312">
    <graphics z="0.0" y="-144.1890759022208" x="-1483.4527494928334"/>
  </node>
  <node id="81019" label="1110001111" cy:nodeId="9313">
    <graphics z="0.0" y="-209.76776929211337" x="1418.1522691228893"/>
  </node>
  <node id="81018" label="1101110011" cy:nodeId="9314">
    <graphics z="0.0" y="2.3471446483163163" x="1358.2631394842174"/>
  </node>
  <node id="81017" label="1101100111" cy:nodeId="9315">
    <graphics z="0.0" y="-338.2765087635489" x="1404.8333432653453"/>
  </node>
  <node id="81016" label="1011100011" cy:nodeId="9316">
    <graphics z="0.0" y="-94.15888257336337" x="1284.072000263026"/>
  </node>
  <node id="81015" label="1001110011" cy:nodeId="9317">
    <graphics z="0.0" y="-58.45331616711337" x="1280.038293597987"/>
  </node>
  <node id="81014" label="1001100111" cy:nodeId="9318">
    <graphics z="0.0" y="-296.4562134296866" x="1253.18309950619"/>
  </node>
  <node id="81013" label="0011100011" cy:nodeId="9319">
    <graphics z="0.0" y="-43.039791539427824" x="-1180.66056657047"/>
  </node>
  <node id="81012" label="0001110011" cy:nodeId="9320">
    <graphics z="0.0" y="8.988692805054598" x="-1197.9795897027943"/>
  </node>
  <node id="81011" label="0001100111" cy:nodeId="9321">
    <graphics z="0.0" y="174.44797472644132" x="-1345.033224346349"/>
  </node>
  <node id="81010" label="1010001111" cy:nodeId="9322">
    <graphics z="0.0" y="-223.07940717053134" x="1356.649522540858"/>
  </node>
  <node id="81009" label="0010001111" cy:nodeId="9323">
    <graphics z="0.0" y="-199.9414066822501" x="-1224.2752363702748"/>
  </node>
  <node id="81008" label="0111010111" cy:nodeId="9324">
    <graphics z="0.0" y="-149.78982587170321" x="-1477.0384733697865"/>
  </node>
  <node id="81007" label="1111010111" cy:nodeId="9325">
    <graphics z="0.0" y="76.30106310534757" x="1670.2284333684947"/>
  </node>
  <node id="81006" label="0011010111" cy:nodeId="9326">
    <graphics z="0.0" y="-254.87303967785556" x="-1427.8119719049428"/>
  </node>
  <node id="81005" label="0101111101" cy:nodeId="9327">
    <graphics z="0.0" y="-45.51220746350009" x="-1593.7972929498646"/>
  </node>
  <node id="81004" label="1011010111" cy:nodeId="9328">
    <graphics z="0.0" y="106.81595568347257" x="1593.7887666204479"/>
  </node>
  <node id="81003" label="1101111101" cy:nodeId="9329">
    <graphics z="0.0" y="-105.79335828137118" x="1359.3624970891979"/>
  </node>
  <node id="81002" label="0001111101" cy:nodeId="9330">
    <graphics z="0.0" y="-22.42462964367587" x="-1560.5867826959584"/>
  </node>
  <node id="81001" label="0100001111" cy:nodeId="9331">
    <graphics z="0.0" y="-13.480293706175871" x="-1328.7976744195912"/>
  </node>
  <node id="81000" label="1001111101" cy:nodeId="9332">
    <graphics z="0.0" y="-88.674171880004" x="1176.5196626165416"/>
  </node>
  <node id="80999" label="1100001111" cy:nodeId="9333">
    <graphics z="0.0" y="-227.1843037159415" x="1253.254617450526"/>
  </node>
  <node id="80998" label="0110110011" cy:nodeId="9334">
    <graphics z="0.0" y="-47.11612363171298" x="-922.55518174381"/>
  </node>
  <node id="80997" label="0110100111" cy:nodeId="9335">
    <graphics z="0.0" y="-88.55130429577548" x="-1012.2680418512318"/>
  </node>
  <node id="80996" label="0110100011" cy:nodeId="9336">
    <graphics z="0.0" y="66.48004870105069" x="-889.29443955631"/>
  </node>
  <node id="80995" label="1110110011" cy:nodeId="9337">
    <graphics z="0.0" y="-124.61418958019931" x="1283.4644105413463"/>
  </node>
  <node id="80994" label="1110100111" cy:nodeId="9338">
    <graphics z="0.0" y="-303.8657478840323" x="1300.610315082362"/>
  </node>
  <node id="80993" label="1000001111" cy:nodeId="9339">
    <graphics z="0.0" y="-226.731544926879" x="1217.833245990565"/>
  </node>
  <node id="80992" label="0000001111" cy:nodeId="9340">
    <graphics z="0.0" y="-67.44554181408603" x="-1260.2493803522084"/>
  </node>
  <node id="80991" label="0110101110" cy:nodeId="9341">
    <graphics z="0.0" y="-79.5418247730704" x="669.5795075872447"/>
  </node>
  <node id="80990" label="0100101110" cy:nodeId="9342">
    <graphics z="0.0" y="-91.75949139904696" x="558.4099976995494"/>
  </node>
  <node id="80989" label="1110101110" cy:nodeId="9343">
    <graphics z="0.0" y="-124.33090634655673" x="-786.2412626764271"/>
  </node>
  <node id="80988" label="1110100011" cy:nodeId="9344">
    <graphics z="0.0" y="-231.8733448536368" x="1154.635507343104"/>
  </node>
  <node id="80987" label="1010110011" cy:nodeId="9345">
    <graphics z="0.0" y="-38.731712773558684" x="1171.4932649114635"/>
  </node>
  <node id="80986" label="1010100111" cy:nodeId="9346">
    <graphics z="0.0" y="-175.96285291027743" x="1166.740472553065"/>
  </node>
  <node id="80985" label="0101010111" cy:nodeId="9347">
    <graphics z="0.0" y="-53.304298833128996" x="-1369.565695049474"/>
  </node>
  <node id="80984" label="0010110011" cy:nodeId="9348">
    <graphics z="0.0" y="-159.78273053478915" x="-1021.4938642999623"/>
  </node>
  <node id="80983" label="0010100111" cy:nodeId="9349">
    <graphics z="0.0" y="-102.98075242352206" x="-1154.1924269220326"/>
  </node>
  <node id="80982" label="1101010111" cy:nodeId="9350">
    <graphics z="0.0" y="-67.30873914074618" x="1588.4000947454479"/>
  </node>
  <node id="80981" label="1100101110" cy:nodeId="9351">
    <graphics z="0.0" y="78.55208544421475" x="-655.7523462793324"/>
  </node>
  <node id="80980" label="1010101110" cy:nodeId="9352">
    <graphics z="0.0" y="-195.7211689503165" x="-640.990162136266"/>
  </node>
  <node id="80979" label="1001101110" cy:nodeId="9353">
    <graphics z="0.0" y="113.583884760621" x="-396.21736741275527"/>
  </node>
  <node id="80978" label="1000101110" cy:nodeId="9354">
    <graphics z="0.0" y="95.07041124987882" x="-535.8814680597279"/>
  </node>
  <node id="80977" label="0010101110" cy:nodeId="9355">
    <graphics z="0.0" y="132.16130785632413" x="576.982888934901"/>
  </node>
  <node id="80976" label="0001101110" cy:nodeId="9356">
    <graphics z="0.0" y="104.48450426745694" x="554.7062013128307"/>
  </node>
  <node id="80975" label="0000101110" cy:nodeId="9357">
    <graphics z="0.0" y="116.91464953112882" x="667.6237275579479"/>
  </node>
  <node id="80974" label="0001010111" cy:nodeId="9358">
    <graphics z="0.0" y="56.65216784167569" x="-1518.2830717584584"/>
  </node>
  <node id="80973" label="1001010111" cy:nodeId="9359">
    <graphics z="0.0" y="64.54578356433194" x="1422.6891477087047"/>
  </node>
  <node id="80972" label="0110111101" cy:nodeId="9360">
    <graphics z="0.0" y="-270.17108960461337" x="-1240.2498838922475"/>
  </node>
  <node id="80971" label="1110111101" cy:nodeId="9361">
    <graphics z="0.0" y="-81.338966801879" x="1431.9985415914562"/>
  </node>
  <node id="80970" label="0111101110" cy:nodeId="9362">
    <graphics z="0.0" y="-123.480080083129" x="464.8222749212291"/>
  </node>
  <node id="80969" label="1111101110" cy:nodeId="9363">
    <graphics z="0.0" y="-63.84204335522372" x="-600.0133078119252"/>
  </node>
  <node id="80968" label="0100110011" cy:nodeId="9364">
    <graphics z="0.0" y="120.53861193347257" x="-1001.9935057184193"/>
  </node>
  <node id="80967" label="0100100111" cy:nodeId="9365">
    <graphics z="0.0" y="168.1758494823007" x="-974.9128172418568"/>
  </node>
  <node id="80966" label="0100100011" cy:nodeId="9366">
    <graphics z="0.0" y="217.66077379870694" x="-971.5352842828725"/>
  </node>
  <node id="80965" label="0010111101" cy:nodeId="9367">
    <graphics z="0.0" y="-289.18941541027743" x="-1402.8274748346303"/>
  </node>
  <node id="80964" label="1100110011" cy:nodeId="9368">
    <graphics z="0.0" y="-71.92313428234775" x="1273.3094880559947"/>
  </node>
  <node id="80963" label="1100100111" cy:nodeId="9369">
    <graphics z="0.0" y="-303.55409856152255" x="1143.5354402044322"/>
  </node>
  <node id="80962" label="1010111101" cy:nodeId="9370">
    <graphics z="0.0" y="50.36157946276944" x="1317.8108308294322"/>
  </node>
  <node id="80961" label="1100100011" cy:nodeId="9371">
    <graphics z="0.0" y="-25.89434094738681" x="1193.325692889979"/>
  </node>
  <node id="80960" label="1010100011" cy:nodeId="9372">
    <graphics z="0.0" y="-68.88378186535556" x="1083.9038484075572"/>
  </node>
  <node id="80959" label="1001100011" cy:nodeId="9373">
    <graphics z="0.0" y="-235.41136212658603" x="1230.1148622015025"/>
  </node>
  <node id="80958" label="1000110011" cy:nodeId="9374">
    <graphics z="0.0" y="-203.53910107922275" x="1089.8609406927135"/>
  </node>
  <node id="80957" label="1000100111" cy:nodeId="9375">
    <graphics z="0.0" y="-197.0237583668204" x="994.2760407903697"/>
  </node>
  <node id="80956" label="1000100011" cy:nodeId="9376">
    <graphics z="0.0" y="-75.20439954113681" x="1110.3017060735729"/>
  </node>
  <node id="80955" label="0010100011" cy:nodeId="9377">
    <graphics z="0.0" y="-21.752159550902434" x="-1058.9854109308217"/>
  </node>
  <node id="80954" label="0001100011" cy:nodeId="9378">
    <graphics z="0.0" y="285.9791026561288" x="-1061.3788511774037"/>
  </node>
  <node id="80953" label="0000110011" cy:nodeId="9379">
    <graphics z="0.0" y="-15.762871220824309" x="-950.2336027643178"/>
  </node>
  <node id="80952" label="0000100111" cy:nodeId="9380">
    <graphics z="0.0" y="138.29186205554288" x="-1144.8673765680287"/>
  </node>
  <node id="80951" label="0000100011" cy:nodeId="9381">
    <graphics z="0.0" y="117.70722155261319" x="-1030.8999998590443"/>
  </node>
  <node id="80950" label="0110010111" cy:nodeId="9382">
    <graphics z="0.0" y="-120.4434246571036" x="-1225.589590313146"/>
  </node>
  <node id="80949" label="1110010111" cy:nodeId="9383">
    <graphics z="0.0" y="38.52417711901944" x="1633.2151582220104"/>
  </node>
  <node id="80948" label="0100111101" cy:nodeId="9384">
    <graphics z="0.0" y="100.99748949694913" x="-1325.8560392877553"/>
  </node>
  <node id="80947" label="1010010111" cy:nodeId="9385">
    <graphics z="0.0" y="53.32825426745694" x="1494.5324037054088"/>
  </node>
  <node id="80946" label="1111100011" cy:nodeId="9386">
    <graphics z="0.0" y="-260.64864392590243" x="1353.8509461858775"/>
  </node>
  <node id="80945" label="0101101110" cy:nodeId="9387">
    <graphics z="0.0" y="-183.98949475598056" x="462.7483689764049"/>
  </node>
  <node id="80944" label="0111100011" cy:nodeId="9388">
    <graphics z="0.0" y="138.82016710925382" x="-1080.9932234308217"/>
  </node>
  <node id="80943" label="1100111101" cy:nodeId="9389">
    <graphics z="0.0" y="-150.5971455128165" x="1244.9120576360729"/>
  </node>
  <node id="80942" label="1101101110" cy:nodeId="9390">
    <graphics z="0.0" y="98.32181505847257" x="-587.1009962579701"/>
  </node>
  <node id="80941" label="0010010111" cy:nodeId="9391">
    <graphics z="0.0" y="-264.88996167492587" x="-1321.879431011388"/>
  </node>
  <node id="80940" label="0000111101" cy:nodeId="9392">
    <graphics z="0.0" y="-128.35430951428134" x="-1422.1785490533803"/>
  </node>
  <node id="80939" label="1000111101" cy:nodeId="9393">
    <graphics z="0.0" y="-77.36685986828525" x="1204.3981416204479"/>
  </node>
  <node id="80938" label="1111011101" cy:nodeId="9394">
    <graphics z="0.0" y="127.16690783191007" x="1665.3787171819713"/>
  </node>
  <node id="80937" label="1111011011" cy:nodeId="9395">
    <graphics z="0.0" y="-15.885582402464934" x="1611.9016816595104"/>
  </node>
  <node id="80936" label="0111011101" cy:nodeId="9396">
    <graphics z="0.0" y="3.7908397166756913" x="-1648.931875469396"/>
  </node>
  <node id="80935" label="0111011011" cy:nodeId="9397">
    <graphics z="0.0" y="5.32842974353116" x="-1569.957754375646"/>
  </node>
  <node id="80934" label="0100010111" cy:nodeId="9398">
    <graphics z="0.0" y="-39.49536938976962" x="-1195.2054655572865"/>
  </node>
  <node id="80933" label="1100010111" cy:nodeId="9399">
    <graphics z="0.0" y="13.938087031128816" x="1492.9573152044322"/>
  </node>
  <node id="80932" label="0101100011" cy:nodeId="9400">
    <graphics z="0.0" y="289.5185313670663" x="-1186.0372335931752"/>
  </node>
  <node id="80931" label="0000010111" cy:nodeId="9401">
    <graphics z="0.0" y="-127.43643231701571" x="-1124.7092001459096"/>
  </node>
  <node id="80930" label="1101100011" cy:nodeId="9402">
    <graphics z="0.0" y="-201.71861310314853" x="1274.67870497494"/>
  </node>
  <node id="80929" label="0111111110" cy:nodeId="9403">
    <graphics z="0.0" y="270.75919298816007" x="374.22584128170274"/>
  </node>
  <node id="80928" label="0011011101" cy:nodeId="9404">
    <graphics z="0.0" y="-208.89673657726962" x="-1627.1823332330678"/>
  </node>
  <node id="80927" label="0011011011" cy:nodeId="9405">
    <graphics z="0.0" y="-217.9318394215079" x="-1520.9887297174428"/>
  </node>
  <node id="80926" label="1000010111" cy:nodeId="9406">
    <graphics z="0.0" y="6.086127802613191" x="1376.4337251165416"/>
  </node>
  <node id="80925" label="1111111110" cy:nodeId="9407">
    <graphics z="0.0" y="-51.89343018841464" x="-734.1275465509389"/>
  </node>
  <node id="80924" label="1011011101" cy:nodeId="9408">
    <graphics z="0.0" y="167.48941759753507" x="1621.9814698675182"/>
  </node>
  <node id="80923" label="1011011011" cy:nodeId="9409">
    <graphics z="0.0" y="-21.987389043089934" x="1434.4215486028697"/>
  </node>
  <node id="80922" label="0011111110" cy:nodeId="9410">
    <graphics z="0.0" y="173.19104723620694" x="317.6064546087291"/>
  </node>
  <node id="80921" label="1011111110" cy:nodeId="9411">
    <graphics z="0.0" y="-91.79387326550204" x="-609.3412382623646"/>
  </node>
  <node id="80920" label="0101011101" cy:nodeId="9412">
    <graphics z="0.0" y="68.3049540965585" x="-1644.5207121393178"/>
  </node>
  <node id="80919" label="0101011011" cy:nodeId="9413">
    <graphics z="0.0" y="14.623725458863191" x="-1411.9503386041615"/>
  </node>
  <node id="80918" label="1101011101" cy:nodeId="9414">
    <graphics z="0.0" y="65.34009508776944" x="1546.176133868983"/>
  </node>
  <node id="80917" label="1101011011" cy:nodeId="9415">
    <graphics z="0.0" y="7.694648310425691" x="1448.8126637914684"/>
  </node>
  <node id="80916" label="0001011101" cy:nodeId="9416">
    <graphics z="0.0" y="-39.16954465222079" x="-1734.8110868951771"/>
  </node>
  <node id="80915" label="0001011011" cy:nodeId="9417">
    <graphics z="0.0" y="-108.16320176434238" x="-1371.0220854303334"/>
  </node>
  <node id="80914" label="1001011101" cy:nodeId="9418">
    <graphics z="0.0" y="120.76657824206632" x="1423.8034436681774"/>
  </node>
  <node id="80913" label="1001011011" cy:nodeId="9419">
    <graphics z="0.0" y="38.333961054566316" x="1489.0733964422252"/>
  </node>
  <node id="80912" label="0101111110" cy:nodeId="9420">
    <graphics z="0.0" y="80.91771654773038" x="266.3045899847057"/>
  </node>
  <node id="80911" label="1101111110" cy:nodeId="9421">
    <graphics z="0.0" y="116.68694262194913" x="-716.7660124322865"/>
  </node>
  <node id="80910" label="0001111110" cy:nodeId="9422">
    <graphics z="0.0" y="35.214942499878816" x="170.4825990179088"/>
  </node>
  <node id="80909" label="1001111110" cy:nodeId="9423">
    <graphics z="0.0" y="156.56458239245694" x="-655.0082581064198"/>
  </node>
  <node id="80908" label="0111101101" cy:nodeId="9424">
    <graphics z="0.0" y="-142.31463666271884" x="-1265.0226347467396"/>
  </node>
  <node id="80907" label="0110011101" cy:nodeId="9425">
    <graphics z="0.0" y="-193.72540326428134" x="-1389.126501323888"/>
  </node>
  <node id="80906" label="0110011011" cy:nodeId="9426">
    <graphics z="0.0" y="-51.89524884533603" x="-1217.3932096979115"/>
  </node>
  <node id="80905" label="1111101101" cy:nodeId="9427">
    <graphics z="0.0" y="-80.02721448254306" x="1414.5468723753002"/>
  </node>
  <node id="80904" label="1110011101" cy:nodeId="9428">
    <graphics z="0.0" y="-90.443947270629" x="1459.106569049647"/>
  </node>
  <node id="80903" label="1110011011" cy:nodeId="9429">
    <graphics z="0.0" y="21.057044550660066" x="1461.1739404180553"/>
  </node>
  <node id="80902" label="0010011101" cy:nodeId="9430">
    <graphics z="0.0" y="-314.8767170460196" x="-1468.8129484674428"/>
  </node>
  <node id="80901" label="0010011011" cy:nodeId="9431">
    <graphics z="0.0" y="-226.44922681164462" x="-1462.668447735021"/>
  </node>
  <node id="80900" label="0011101101" cy:nodeId="9432">
    <graphics z="0.0" y="-137.23924298596103" x="-1493.9331877252553"/>
  </node>
  <node id="80899" label="1011101101" cy:nodeId="9433">
    <graphics z="0.0" y="-44.063621953246184" x="1453.366533038905"/>
  </node>
  <node id="80898" label="1010011101" cy:nodeId="9434">
    <graphics z="0.0" y="79.51825670886319" x="1538.1390168645885"/>
  </node>
  <node id="80897" label="1010011011" cy:nodeId="9435">
    <graphics z="0.0" y="148.88806872058194" x="1300.6055314519908"/>
  </node>
  <node id="80896" label="0110111110" cy:nodeId="9436">
    <graphics z="0.0" y="230.57553820300382" x="511.12223219661973"/>
  </node>
  <node id="80895" label="1110111110" cy:nodeId="9437">
    <graphics z="0.0" y="-173.7856983692618" x="-763.8201048395131"/>
  </node>
  <node id="80894" label="0010111110" cy:nodeId="9438">
    <graphics z="0.0" y="139.59204821276944" x="373.59935927181505"/>
  </node>
  <node id="80893" label="1010111110" cy:nodeId="9439">
    <graphics z="0.0" y="-112.10977979016025" x="-675.6050283929799"/>
  </node>
  <node id="80892" label="0111000111" cy:nodeId="9440">
    <graphics z="0.0" y="33.710471674683504" x="-1481.8104765436146"/>
  </node>
  <node id="80891" label="1111000111" cy:nodeId="9441">
    <graphics z="0.0" y="-112.72280164074618" x="1655.9352204778697"/>
  </node>
  <node id="80890" label="0101101101" cy:nodeId="9442">
    <graphics z="0.0" y="81.18604235339444" x="-1227.6434233209584"/>
  </node>
  <node id="80889" label="1100011101" cy:nodeId="9443">
    <graphics z="0.0" y="-98.89197583508212" x="1326.4461839178111"/>
  </node>
  <node id="80888" label="1100011011" cy:nodeId="9444">
    <graphics z="0.0" y="-12.463982060668059" x="1309.0849931219127"/>
  </node>
  <node id="80887" label="1101101101" cy:nodeId="9445">
    <graphics z="0.0" y="-194.30560345959384" x="1439.5048997381236"/>
  </node>
  <node id="80886" label="1011000111" cy:nodeId="9446">
    <graphics z="0.0" y="-98.15639539074618" x="1465.6913354375865"/>
  </node>
  <node id="80885" label="0011000111" cy:nodeId="9447">
    <graphics z="0.0" y="-21.659271672484465" x="-1474.7569181940053"/>
  </node>
  <node id="80884" label="0100011101" cy:nodeId="9448">
    <graphics z="0.0" y="116.26215319323819" x="-1514.6133635065053"/>
  </node>
  <node id="80883" label="0100011011" cy:nodeId="9449">
    <graphics z="0.0" y="14.192672297242098" x="-1346.937978985021"/>
  </node>
  <node id="80882" label="0111110110" cy:nodeId="9450">
    <graphics z="0.0" y="120.87567858386319" x="315.59523176937364"/>
  </node>
  <node id="80881" label="1111110110" cy:nodeId="9451">
    <graphics z="0.0" y="-216.29854626965243" x="-552.1886580011342"/>
  </node>
  <node id="80880" label="1011101001" cy:nodeId="9452">
    <graphics z="0.0" y="-17.55437512707431" x="1206.8938691595104"/>
  </node>
  <node id="80879" label="1001101101" cy:nodeId="9453">
    <graphics z="0.0" y="-193.02979321789462" x="1114.7303254583385"/>
  </node>
  <node id="80878" label="0011101001" cy:nodeId="9454">
    <graphics z="0.0" y="97.87598375964444" x="-1546.8432219049428"/>
  </node>
  <node id="80877" label="0001101101" cy:nodeId="9455">
    <graphics z="0.0" y="7.528708979371004" x="-1541.2720243951771"/>
  </node>
  <node id="80876" label="0000011101" cy:nodeId="9456">
    <graphics z="0.0" y="-175.6893848926993" x="-1568.169454815099"/>
  </node>
  <node id="80875" label="0000011011" cy:nodeId="9457">
    <graphics z="0.0" y="10.168929621460848" x="-1128.0832598230336"/>
  </node>
  <node id="80874" label="1000011101" cy:nodeId="9458">
    <graphics z="0.0" y="52.20117907214444" x="1156.7979218938854"/>
  </node>
  <node id="80873" label="1000011011" cy:nodeId="9459">
    <graphics z="0.0" y="-61.706016972777434" x="1152.9680573919322"/>
  </node>
  <node id="80872" label="0100111110" cy:nodeId="9460">
    <graphics z="0.0" y="188.37691454577725" x="485.0071046331432"/>
  </node>
  <node id="80871" label="0011110110" cy:nodeId="9461">
    <graphics z="0.0" y="222.05420641589444" x="191.7556703069713"/>
  </node>
  <node id="80870" label="1100111110" cy:nodeId="9462">
    <graphics z="0.0" y="43.392486140015535" x="-747.9452269098256"/>
  </node>
  <node id="80869" label="1011110110" cy:nodeId="9463">
    <graphics z="0.0" y="-207.2352833301993" x="-488.56926560611464"/>
  </node>
  <node id="80868" label="0000111110" cy:nodeId="9464">
    <graphics z="0.0" y="118.97960619616788" x="421.0078446844127"/>
  </node>
  <node id="80867" label="1000111110" cy:nodeId="9465">
    <graphics z="0.0" y="-38.10228009533603" x="-639.3760283014271"/>
  </node>
  <node id="80866" label="0101000111" cy:nodeId="9466">
    <graphics z="0.0" y="147.08940844226163" x="-1379.7409117242787"/>
  </node>
  <node id="80865" label="1101000111" cy:nodeId="9467">
    <graphics z="0.0" y="-101.31261487316806" x="1481.2187364080455"/>
  </node>
  <node id="80864" label="0001000111" cy:nodeId="9468">
    <graphics z="0.0" y="176.66358141589444" x="-1307.7441160699818"/>
  </node>
  <node id="80863" label="1001000111" cy:nodeId="9469">
    <graphics z="0.0" y="-161.33788342785556" x="1353.3691651800182"/>
  </node>
  <node id="80862" label="0101110110" cy:nodeId="9470">
    <graphics z="0.0" y="-73.15021558117587" x="218.79923414974473"/>
  </node>
  <node id="80861" label="1101110110" cy:nodeId="9471">
    <graphics z="0.0" y="9.210403010132723" x="-589.1044523736928"/>
  </node>
  <node id="80860" label="0110101101" cy:nodeId="9472">
    <graphics z="0.0" y="-239.73481030773837" x="-1045.0279295465443"/>
  </node>
  <node id="80859" label="0110101001" cy:nodeId="9473">
    <graphics z="0.0" y="-92.42499537777621" x="-1128.2486221811268"/>
  </node>
  <node id="80858" label="1110101101" cy:nodeId="9474">
    <graphics z="0.0" y="-195.21989484142978" x="1316.574083087733"/>
  </node>
  <node id="80857" label="0001110110" cy:nodeId="9475">
    <graphics z="0.0" y="94.02718310046475" x="199.45185255794786"/>
  </node>
  <node id="80856" label="1001110110" cy:nodeId="9476">
    <graphics z="0.0" y="-16.93592114758212" x="-616.3526480218861"/>
  </node>
  <node id="80855" label="1110101001" cy:nodeId="9477">
    <graphics z="0.0" y="-108.81603284191806" x="1145.7435700872447"/>
  </node>
  <node id="80854" label="1010101101" cy:nodeId="9478">
    <graphics z="0.0" y="-100.65494580578525" x="1213.3029267766979"/>
  </node>
  <node id="80853" label="0010101101" cy:nodeId="9479">
    <graphics z="0.0" y="-187.58162732433993" x="-1300.2343046686146"/>
  </node>
  <node id="80852" label="0111111001" cy:nodeId="9480">
    <graphics z="0.0" y="79.20825915026944" x="-1311.9696867486928"/>
  </node>
  <node id="80851" label="0111110101" cy:nodeId="9481">
    <graphics z="0.0" y="8.647864863160066" x="-1292.5614531061146"/>
  </node>
  <node id="80850" label="1111111001" cy:nodeId="9482">
    <graphics z="0.0" y="-26.654808476683684" x="1383.797570941737"/>
  </node>
  <node id="80849" label="1111110101" cy:nodeId="9483">
    <graphics z="0.0" y="176.87735705066007" x="1432.8089807012584"/>
  </node>
  <node id="80848" label="0011111001" cy:nodeId="9484">
    <graphics z="0.0" y="24.119658991578035" x="-1531.4226896783803"/>
  </node>
  <node id="80847" label="0011110101" cy:nodeId="9485">
    <graphics z="0.0" y="-50.274898961302824" x="-1530.4701750299428"/>
  </node>
  <node id="80846" label="0110000111" cy:nodeId="9486">
    <graphics z="0.0" y="-87.16707654308993" x="-1146.4235651514027"/>
  </node>
  <node id="80845" label="1011111001" cy:nodeId="9487">
    <graphics z="0.0" y="157.60596422839444" x="1381.0864541509654"/>
  </node>
  <node id="80844" label="1011110101" cy:nodeId="9488">
    <graphics z="0.0" y="147.93845324206632" x="1416.8977820852306"/>
  </node>
  <node id="80843" label="1110000111" cy:nodeId="9489">
    <graphics z="0.0" y="-138.52355237316806" x="1535.8661210516002"/>
  </node>
  <node id="80842" label="0100101101" cy:nodeId="9490">
    <graphics z="0.0" y="48.29315905261319" x="-1093.214636089513"/>
  </node>
  <node id="80841" label="0100101001" cy:nodeId="9491">
    <graphics z="0.0" y="209.24280504870694" x="-1215.4287245294545"/>
  </node>
  <node id="80840" label="1100101101" cy:nodeId="9492">
    <graphics z="0.0" y="-259.23458905529696" x="1255.4569032171275"/>
  </node>
  <node id="80839" label="1010000111" cy:nodeId="9493">
    <graphics z="0.0" y="56.35681872058194" x="1359.6631562688854"/>
  </node>
  <node id="80838" label="0010000111" cy:nodeId="9494">
    <graphics z="0.0" y="-101.29115720104892" x="-1292.3801786920521"/>
  </node>
  <node id="80837" label="0110110110" cy:nodeId="9495">
    <graphics z="0.0" y="174.06383471179288" x="387.458116290858"/>
  </node>
  <node id="80836" label="1110110110" cy:nodeId="9496">
    <graphics z="0.0" y="-234.51863904308993" x="-726.3589155694935"/>
  </node>
  <node id="80835" label="1100101001" cy:nodeId="9497">
    <graphics z="0.0" y="-123.4538349659415" x="983.5670258977916"/>
  </node>
  <node id="80834" label="1010101001" cy:nodeId="9498">
    <graphics z="0.0" y="-141.37250562023837" x="1085.7651765325572"/>
  </node>
  <node id="80833" label="1001101001" cy:nodeId="9499">
    <graphics z="0.0" y="-126.07112927746493" x="1061.8893525579479"/>
  </node>
  <node id="80832" label="1000101101" cy:nodeId="9500">
    <graphics z="0.0" y="-202.2868656666251" x="1031.4411103704479"/>
  </node>
  <node id="80831" label="1000101001" cy:nodeId="9501">
    <graphics z="0.0" y="-94.15833325695712" x="964.6263825872447"/>
  </node>
  <node id="80830" label="0010101001" cy:nodeId="9502">
    <graphics z="0.0" y="-179.2074512989493" x="-1222.1040327569935"/>
  </node>
  <node id="80829" label="0001101001" cy:nodeId="9503">
    <graphics z="0.0" y="209.99649767566007" x="-1446.842520000646"/>
  </node>
  <node id="80828" label="0000101101" cy:nodeId="9504">
    <graphics z="0.0" y="28.844344660523348" x="-1353.299566509435"/>
  </node>
  <node id="80827" label="0000101001" cy:nodeId="9505">
    <graphics z="0.0" y="184.4240184276132" x="-1163.5953333398793"/>
  </node>
  <node id="80826" label="0010110110" cy:nodeId="9506">
    <graphics z="0.0" y="273.8712840526132" x="299.65087294369005"/>
  </node>
  <node id="80825" label="1010110110" cy:nodeId="9507">
    <graphics z="0.0" y="-295.7165607960196" x="-601.1453001520131"/>
  </node>
  <node id="80824" label="0101111001" cy:nodeId="9508">
    <graphics z="0.0" y="177.95499376941007" x="-1475.2532866022084"/>
  </node>
  <node id="80823" label="0101110101" cy:nodeId="9509">
    <graphics z="0.0" y="49.69293932605069" x="-1465.930410625646"/>
  </node>
  <node id="80822" label="1101111001" cy:nodeId="9510">
    <graphics z="0.0" y="-64.83269543957431" x="1182.407678363612"/>
  </node>
  <node id="80821" label="1101110101" cy:nodeId="9511">
    <graphics z="0.0" y="146.1077342479257" x="1342.6322114446666"/>
  </node>
  <node id="80820" label="0111101001" cy:nodeId="9512">
    <graphics z="0.0" y="174.10376696276944" x="-1256.8304960748646"/>
  </node>
  <node id="80819" label="0111001101" cy:nodeId="9513">
    <graphics z="0.0" y="-17.13481946301181" x="-1478.999014141271"/>
  </node>
  <node id="80818" label="0111001011" cy:nodeId="9514">
    <graphics z="0.0" y="-100.2534012348624" x="-1262.3994963190053"/>
  </node>
  <node id="80817" label="0111001001" cy:nodeId="9515">
    <graphics z="0.0" y="104.58502916980069" x="-1450.6453154108021"/>
  </node>
  <node id="80816" label="0001111001" cy:nodeId="9516">
    <graphics z="0.0" y="15.722884699585848" x="-1597.0977995416615"/>
  </node>
  <node id="80815" label="0001110101" cy:nodeId="9517">
    <graphics z="0.0" y="170.3220897166757" x="-1538.6969816705678"/>
  </node>
  <node id="80814" label="0100000111" cy:nodeId="9518">
    <graphics z="0.0" y="244.09757189441007" x="-1157.8846743127797"/>
  </node>
  <node id="80813" label="1111101001" cy:nodeId="9519">
    <graphics z="0.0" y="-140.61585278820712" x="1401.4739453771617"/>
  </node>
  <node id="80812" label="1111001101" cy:nodeId="9520">
    <graphics z="0.0" y="-39.51848645519931" x="1612.0124757268932"/>
  </node>
  <node id="80811" label="1111001011" cy:nodeId="9521">
    <graphics z="0.0" y="-148.89028210949618" x="1502.0009629705455"/>
  </node>
  <node id="80810" label="1001111001" cy:nodeId="9522">
    <graphics z="0.0" y="108.42194323230069" x="1104.439950702479"/>
  </node>
  <node id="80809" label="1001110101" cy:nodeId="9523">
    <graphics z="0.0" y="99.56522326159757" x="1136.6559541204479"/>
  </node>
  <node id="80808" label="1100000111" cy:nodeId="9524">
    <graphics z="0.0" y="-128.56629224133212" x="1205.6619355657604"/>
  </node>
  <node id="80807" label="0111111010" cy:nodeId="9525">
    <graphics z="0.0" y="290.0186534373788" x="422.5467774847057"/>
  </node>
  <node id="80806" label="1111001001" cy:nodeId="9526">
    <graphics z="0.0" y="40.743201777222566" x="1453.2557923772838"/>
  </node>
  <node id="80805" label="1011001101" cy:nodeId="9527">
    <graphics z="0.0" y="42.17243151355069" x="1612.7192933538463"/>
  </node>
  <node id="80804" label="1011001011" cy:nodeId="9528">
    <graphics z="0.0" y="-122.45412488293368" x="1389.7127873876598"/>
  </node>
  <node id="80803" label="1011001001" cy:nodeId="9529">
    <graphics z="0.0" y="126.83100084948819" x="1502.41210341244"/>
  </node>
  <node id="80802" label="0000000111" cy:nodeId="9530">
    <graphics z="0.0" y="169.40073351550382" x="-1248.0376265069935"/>
  </node>
  <node id="80801" label="0100110110" cy:nodeId="9531">
    <graphics z="0.0" y="79.55847887683194" x="318.1528642156627"/>
  </node>
  <node id="80800" label="0011001101" cy:nodeId="9532">
    <graphics z="0.0" y="-141.64136548351962" x="-1627.7158720514271"/>
  </node>
  <node id="80799" label="0011001011" cy:nodeId="9533">
    <graphics z="0.0" y="-65.68922849011142" x="-1335.4523527643178"/>
  </node>
  <node id="80798" label="0011001001" cy:nodeId="9534">
    <graphics z="0.0" y="-60.3751987965079" x="-1504.5512297174428"/>
  </node>
  <node id="80797" label="1000000111" cy:nodeId="9535">
    <graphics z="0.0" y="-73.22972913098056" x="1158.5880219915416"/>
  </node>
  <node id="80796" label="1111111010" cy:nodeId="9536">
    <graphics z="0.0" y="-168.79515881848056" x="-554.6878874322865"/>
  </node>
  <node id="80795" label="1100110110" cy:nodeId="9537">
    <graphics z="0.0" y="-92.32964749645907" x="-603.7927763483021"/>
  </node>
  <node id="80794" label="1011111010" cy:nodeId="9538">
    <graphics z="0.0" y="-123.44665570568759" x="-416.8421385309193"/>
  </node>
  <node id="80793" label="0011111010" cy:nodeId="9539">
    <graphics z="0.0" y="375.1085887401132" x="401.3659074285533"/>
  </node>
  <node id="80792" label="0000110110" cy:nodeId="9540">
    <graphics z="0.0" y="280.5316844432382" x="405.28653883724473"/>
  </node>
  <node id="80791" label="1000110110" cy:nodeId="9541">
    <graphics z="0.0" y="-155.92177625012118" x="-670.8401148340199"/>
  </node>
  <node id="80790" label="0110111001" cy:nodeId="9542">
    <graphics z="0.0" y="14.492934748413973" x="-1152.7261183282826"/>
  </node>
  <node id="80789" label="0110110101" cy:nodeId="9543">
    <graphics z="0.0" y="-40.02956052136142" x="-1286.5591642877553"/>
  </node>
  <node id="80788" label="0101101001" cy:nodeId="9544">
    <graphics z="0.0" y="237.95667223620694" x="-1295.8787138483021"/>
  </node>
  <node id="80787" label="0101001101" cy:nodeId="9545">
    <graphics z="0.0" y="71.33760790515225" x="-1380.5757505914662"/>
  </node>
  <node id="80786" label="0101001011" cy:nodeId="9546">
    <graphics z="0.0" y="259.8366466014413" x="-1275.3041288873646"/>
  </node>
  <node id="80785" label="1110111001" cy:nodeId="9547">
    <graphics z="0.0" y="0.8776317088631913" x="1216.449670551112"/>
  </node>
  <node id="80784" label="1110110101" cy:nodeId="9548">
    <graphics z="0.0" y="39.595130488160066" x="1381.5961091497447"/>
  </node>
  <node id="80783" label="1101101001" cy:nodeId="9549">
    <graphics z="0.0" y="-142.18770642590243" x="1311.4067246892955"/>
  </node>
  <node id="80782" label="1101001101" cy:nodeId="9550">
    <graphics z="0.0" y="-25.32372327160556" x="1417.0001828649547"/>
  </node>
  <node id="80781" label="1101001011" cy:nodeId="9551">
    <graphics z="0.0" y="-148.6249317676993" x="1320.2843186834361"/>
  </node>
  <node id="80780" label="0111100110" cy:nodeId="9552">
    <graphics z="0.0" y="-103.48039288830478" x="326.4515588262584"/>
  </node>
  <node id="80779" label="1111100110" cy:nodeId="9553">
    <graphics z="0.0" y="-137.32967419933993" x="-355.54033494205214"/>
  </node>
  <node id="80778" label="0101111010" cy:nodeId="9554">
    <graphics z="0.0" y="98.96628527331632" x="494.83983778744005"/>
  </node>
  <node id="80777" label="0011100110" cy:nodeId="9555">
    <graphics z="0.0" y="59.595252558472566" x="398.80090880184434"/>
  </node>
  <node id="80776" label="1010111001" cy:nodeId="9556">
    <graphics z="0.0" y="-147.77497144055087" x="1080.5908906438854"/>
  </node>
  <node id="80775" label="1010110101" cy:nodeId="9557">
    <graphics z="0.0" y="149.51254992175382" x="1259.302484271815"/>
  </node>
  <node id="80774" label="0001001101" cy:nodeId="9558">
    <graphics z="0.0" y="27.675017878296785" x="-1601.6049101373646"/>
  </node>
  <node id="80773" label="0001001011" cy:nodeId="9559">
    <graphics z="0.0" y="73.73970751452725" x="-1266.1559050104115"/>
  </node>
  <node id="80772" label="1011100110" cy:nodeId="9560">
    <graphics z="0.0" y="-321.207863286254" x="-247.2249662897084"/>
  </node>
  <node id="80771" label="1001001101" cy:nodeId="9561">
    <graphics z="0.0" y="22.831336542847566" x="1283.468011615565"/>
  </node>
  <node id="80770" label="1001001011" cy:nodeId="9562">
    <graphics z="0.0" y="-157.69130750012118" x="1115.1795136907604"/>
  </node>
  <node id="80769" label="0010111001" cy:nodeId="9563">
    <graphics z="0.0" y="-81.4068731815787" x="-1229.9597303888295"/>
  </node>
  <node id="80768" label="0010110101" cy:nodeId="9564">
    <graphics z="0.0" y="-246.44367261242587" x="-1381.3371031305287"/>
  </node>
  <node id="80767" label="1101111010" cy:nodeId="9565">
    <graphics z="0.0" y="14.368239924195223" x="-515.1817839166615"/>
  </node>
  <node id="80766" label="1011101010" cy:nodeId="9566">
    <graphics z="0.0" y="-202.81024976086337" x="-248.4162504693959"/>
  </node>
  <node id="80765" label="1001111010" cy:nodeId="9567">
    <graphics z="0.0" y="40.37477068591397" x="-503.0073149225209"/>
  </node>
  <node id="80764" label="0011101010" cy:nodeId="9568">
    <graphics z="0.0" y="279.9632029979257" x="510.7611176946666"/>
  </node>
  <node id="80763" label="0001111010" cy:nodeId="9569">
    <graphics z="0.0" y="296.2826915233163" x="362.3267228582408"/>
  </node>
  <node id="80762" label="0111011110" cy:nodeId="9570">
    <graphics z="0.0" y="192.90518908191007" x="244.85936140804552"/>
  </node>
  <node id="80761" label="1111011110" cy:nodeId="9571">
    <graphics z="0.0" y="-79.70263905834872" x="-552.6672804376576"/>
  </node>
  <node id="80760" label="0100111001" cy:nodeId="9572">
    <graphics z="0.0" y="139.19998888659757" x="-1300.1983091852162"/>
  </node>
  <node id="80759" label="0100110101" cy:nodeId="9573">
    <graphics z="0.0" y="75.48357348132413" x="-1258.5184385797475"/>
  </node>
  <node id="80758" label="1100111001" cy:nodeId="9574">
    <graphics z="0.0" y="87.96878771472257" x="1055.0369660833385"/>
  </node>
  <node id="80757" label="1100110101" cy:nodeId="9575">
    <graphics z="0.0" y="72.49997667956632" x="1196.973153827479"/>
  </node>
  <node id="80756" label="0101100110" cy:nodeId="9576">
    <graphics z="0.0" y="-262.01837964367587" x="328.53857970028184"/>
  </node>
  <node id="80755" label="0011011110" cy:nodeId="9577">
    <graphics z="0.0" y="238.41748766589444" x="230.15535902767442"/>
  </node>
  <node id="80754" label="1101100110" cy:nodeId="9578">
    <graphics z="0.0" y="-105.10107465100009" x="-225.95894456119277"/>
  </node>
  <node id="80753" label="1011011110" cy:nodeId="9579">
    <graphics z="0.0" y="146.63260607409757" x="-473.4056150934193"/>
  </node>
  <node id="80752" label="0000111001" cy:nodeId="9580">
    <graphics z="0.0" y="86.92107348132413" x="-1248.4329359552357"/>
  </node>
  <node id="80751" label="0000110101" cy:nodeId="9581">
    <graphics z="0.0" y="-0.2258991749258712" x="-1359.8290159723256"/>
  </node>
  <node id="80750" label="0110001101" cy:nodeId="9582">
    <graphics z="0.0" y="-269.6384815723868" x="-1299.0421354791615"/>
  </node>
  <node id="80749" label="0110001011" cy:nodeId="9583">
    <graphics z="0.0" y="-3.1122898609610274" x="-1214.8980391046498"/>
  </node>
  <node id="80748" label="0110001001" cy:nodeId="9584">
    <graphics z="0.0" y="104.79282335925382" x="-1299.534948589513"/>
  </node>
  <node id="80747" label="1000111001" cy:nodeId="9585">
    <graphics z="0.0" y="-8.260368779418059" x="1045.2110993841197"/>
  </node>
  <node id="80746" label="1000110101" cy:nodeId="9586">
    <graphics z="0.0" y="251.48401598620694" x="1180.7827393987682"/>
  </node>
  <node id="80745" label="1110001101" cy:nodeId="9587">
    <graphics z="0.0" y="-4.432365849730559" x="1177.0100953557994"/>
  </node>
  <node id="80744" label="1110001011" cy:nodeId="9588">
    <graphics z="0.0" y="-241.68893475842196" x="1686.5159699895885"/>
  </node>
  <node id="80743" label="0001100110" cy:nodeId="9589">
    <graphics z="0.0" y="-71.77426190685946" x="381.36566519527696"/>
  </node>
  <node id="80742" label="1001100110" cy:nodeId="9590">
    <graphics z="0.0" y="18.701156183960848" x="-236.39046311588027"/>
  </node>
  <node id="80741" label="0010001101" cy:nodeId="9591">
    <graphics z="0.0" y="-251.64911694836337" x="-1492.474111797521"/>
  </node>
  <node id="80740" label="0010001011" cy:nodeId="9592">
    <graphics z="0.0" y="-246.11551709484775" x="-1196.0440466424916"/>
  </node>
  <node id="80739" label="0010001001" cy:nodeId="9593">
    <graphics z="0.0" y="-66.66335530590732" x="-1332.9822752496693"/>
  </node>
  <node id="80738" label="1110001001" cy:nodeId="9594">
    <graphics z="0.0" y="244.9317088573007" x="1379.4238679388072"/>
  </node>
  <node id="80737" label="1010001101" cy:nodeId="9595">
    <graphics z="0.0" y="104.83081774401944" x="1421.0762670019176"/>
  </node>
  <node id="80736" label="1010001011" cy:nodeId="9596">
    <graphics z="0.0" y="-110.71395154308993" x="1206.7344300725963"/>
  </node>
  <node id="80735" label="1010001001" cy:nodeId="9597">
    <graphics z="0.0" y="12.487250849488191" x="1235.7584626653697"/>
  </node>
  <node id="80734" label="0110111010" cy:nodeId="9598">
    <graphics z="0.0" y="349.4616466014413" x="538.6669557073619"/>
  </node>
  <node id="80733" label="0110101010" cy:nodeId="9599">
    <graphics z="0.0" y="178.94490770983975" x="724.3179109075572"/>
  </node>
  <node id="80732" label="1110111010" cy:nodeId="9600">
    <graphics z="0.0" y="-142.37399335217196" x="-749.5228178522084"/>
  </node>
  <node id="80731" label="1111011001" cy:nodeId="9601">
    <graphics z="0.0" y="180.67642931628507" x="1494.208345172694"/>
  </node>
  <node id="80730" label="1111010101" cy:nodeId="9602">
    <graphics z="0.0" y="240.4835887401132" x="1533.7491929510143"/>
  </node>
  <node id="80729" label="1111010011" cy:nodeId="9603">
    <graphics z="0.0" y="107.67362169909757" x="1418.565011976054"/>
  </node>
  <node id="80728" label="1111010001" cy:nodeId="9604">
    <graphics z="0.0" y="240.5663524119882" x="1442.1944711187389"/>
  </node>
  <node id="80727" label="0111011001" cy:nodeId="9605">
    <graphics z="0.0" y="131.18015246081632" x="-1490.7079069635365"/>
  </node>
  <node id="80726" label="0111010101" cy:nodeId="9606">
    <graphics z="0.0" y="55.131064936402254" x="-1526.5020658990834"/>
  </node>
  <node id="80725" label="0111010011" cy:nodeId="9607">
    <graphics z="0.0" y="-79.42151875805575" x="-1370.8822081109975"/>
  </node>
  <node id="80724" label="0111010001" cy:nodeId="9608">
    <graphics z="0.0" y="268.8509288280038" x="-1430.6882841608021"/>
  </node>
  <node id="80723" label="1110101010" cy:nodeId="9609">
    <graphics z="0.0" y="-231.82125134777743" x="-681.4932806512807"/>
  </node>
  <node id="80722" label="1010111010" cy:nodeId="9610">
    <graphics z="0.0" y="-200.94481702160556" x="-587.1011106988881"/>
  </node>
  <node id="80721" label="0101011110" cy:nodeId="9611">
    <graphics z="0.0" y="-201.1718067676993" x="129.0427339056041"/>
  </node>
  <node id="80720" label="0010111010" cy:nodeId="9612">
    <graphics z="0.0" y="350.10465197253507" x="486.56664442806505"/>
  </node>
  <node id="80719" label="1101011110" cy:nodeId="9613">
    <graphics z="0.0" y="154.57596544909757" x="-547.3692457696889"/>
  </node>
  <node id="80718" label="0011011001" cy:nodeId="9614">
    <graphics z="0.0" y="-55.9209751636954" x="-1584.908468486974"/>
  </node>
  <node id="80717" label="0011010101" cy:nodeId="9615">
    <graphics z="0.0" y="-82.87110753369052" x="-1566.215811016271"/>
  </node>
  <node id="80716" label="0011010011" cy:nodeId="9616">
    <graphics z="0.0" y="-48.08286710095126" x="-1487.486593486974"/>
  </node>
  <node id="80715" label="0011010001" cy:nodeId="9617">
    <graphics z="0.0" y="-99.58791394543368" x="-1427.7993986627553"/>
  </node>
  <node id="80714" label="1011011001" cy:nodeId="9618">
    <graphics z="0.0" y="283.4641795604257" x="1376.7672021368053"/>
  </node>
  <node id="80713" label="1011010101" cy:nodeId="9619">
    <graphics z="0.0" y="246.3747020213632" x="1589.3692719915416"/>
  </node>
  <node id="80712" label="1011010011" cy:nodeId="9620">
    <graphics z="0.0" y="191.67618517566007" x="1453.3693864324596"/>
  </node>
  <node id="80711" label="1011010001" cy:nodeId="9621">
    <graphics z="0.0" y="334.09082750964444" x="1419.1965467908885"/>
  </node>
  <node id="80710" label="0001011110" cy:nodeId="9622">
    <graphics z="0.0" y="68.75138048816007" x="175.05997633724473"/>
  </node>
  <node id="80709" label="1001011110" cy:nodeId="9623">
    <graphics z="0.0" y="351.12503771472257" x="-435.86247849673964"/>
  </node>
  <node id="80708" label="0101001001" cy:nodeId="9624">
    <graphics z="0.0" y="276.28092150378507" x="-1414.2685148736928"/>
  </node>
  <node id="80707" label="0100001101" cy:nodeId="9625">
    <graphics z="0.0" y="29.364593073609285" x="-1448.6546537897084"/>
  </node>
  <node id="80706" label="0100001011" cy:nodeId="9626">
    <graphics z="0.0" y="106.0686259715585" x="-1165.6733915826771"/>
  </node>
  <node id="80705" label="0100001001" cy:nodeId="9627">
    <graphics z="0.0" y="161.43526415515225" x="-1457.7434599420521"/>
  </node>
  <node id="80704" label="1101001001" cy:nodeId="9628">
    <graphics z="0.0" y="-33.55767102551181" x="1224.65624403744"/>
  </node>
  <node id="80703" label="1100001101" cy:nodeId="9629">
    <graphics z="0.0" y="-40.483849004027434" x="1248.3873689153697"/>
  </node>
  <node id="80702" label="1100001011" cy:nodeId="9630">
    <graphics z="0.0" y="-41.103905156371184" x="1296.433572528651"/>
  </node>
  <node id="80701" label="0110100110" cy:nodeId="9631">
    <graphics z="0.0" y="1.7937674968270585" x="528.3908936956432"/>
  </node>
  <node id="80700" label="1110100110" cy:nodeId="9632">
    <graphics z="0.0" y="-228.47553296398837" x="-553.3236906549428"/>
  </node>
  <node id="80699" label="0001001001" cy:nodeId="9633">
    <graphics z="0.0" y="62.776023432496004" x="-1543.123525860021"/>
  </node>
  <node id="80698" label="0000001101" cy:nodeId="9634">
    <graphics z="0.0" y="4.284629389527254" x="-1344.9217283746693"/>
  </node>
  <node id="80697" label="0000001011" cy:nodeId="9635">
    <graphics z="0.0" y="-117.24321408581454" x="-1199.6291105768178"/>
  </node>
  <node id="80696" label="0000001001" cy:nodeId="9636">
    <graphics z="0.0" y="25.81976275134366" x="-1473.8024199029896"/>
  </node>
  <node id="80695" label="1100001001" cy:nodeId="9637">
    <graphics z="0.0" y="111.76233629870694" x="1100.7515351751354"/>
  </node>
  <node id="80694" label="1001001001" cy:nodeId="9638">
    <graphics z="0.0" y="29.33850817370694" x="1201.2389466741588"/>
  </node>
  <node id="80693" label="1000001101" cy:nodeId="9639">
    <graphics z="0.0" y="-2.6923145801993087" x="1076.4051606634166"/>
  </node>
  <node id="80692" label="1000001011" cy:nodeId="9640">
    <graphics z="0.0" y="-250.74249310803134" x="1044.7889497259166"/>
  </node>
  <node id="80691" label="1000001001" cy:nodeId="9641">
    <graphics z="0.0" y="-50.771812871214934" x="881.3435761907604"/>
  </node>
  <node id="80690" label="0100111010" cy:nodeId="9642">
    <graphics z="0.0" y="209.7444072215585" x="628.211892841151"/>
  </node>
  <node id="80689" label="0100101010" cy:nodeId="9643">
    <graphics z="0.0" y="-12.116999104735442" x="684.1511628606822"/>
  </node>
  <node id="80688" label="0010100110" cy:nodeId="9644">
    <graphics z="0.0" y="-100.97071118664462" x="464.30519270687364"/>
  </node>
  <node id="80687" label="1100111010" cy:nodeId="9645">
    <graphics z="0.0" y="-16.407543614623137" x="-640.8229696771596"/>
  </node>
  <node id="80686" label="1010100110" cy:nodeId="9646">
    <graphics z="0.0" y="-179.61801190685946" x="-451.6002409479115"/>
  </node>
  <node id="80685" label="0101011001" cy:nodeId="9647">
    <graphics z="0.0" y="261.9075389354257" x="-1522.167715313146"/>
  </node>
  <node id="80684" label="0101010101" cy:nodeId="9648">
    <graphics z="0.0" y="110.04460863757413" x="-1578.3246061822865"/>
  </node>
  <node id="80683" label="0101010011" cy:nodeId="9649">
    <graphics z="0.0" y="141.43685106921475" x="-1299.8195402643178"/>
  </node>
  <node id="80682" label="1101011001" cy:nodeId="9650">
    <graphics z="0.0" y="146.79944567370694" x="1314.0634248235729"/>
  </node>
  <node id="80681" label="1101010101" cy:nodeId="9651">
    <graphics z="0.0" y="195.46506457019132" x="1432.464653728297"/>
  </node>
  <node id="80680" label="1101010011" cy:nodeId="9652">
    <graphics z="0.0" y="89.60456041980069" x="1577.949228046229"/>
  </node>
  <node id="80679" label="1100101010" cy:nodeId="9653">
    <graphics z="0.0" y="4.127273127320223" x="-540.574484111974"/>
  </node>
  <node id="80678" label="1010101010" cy:nodeId="9654">
    <graphics z="0.0" y="-237.08922620129306" x="-422.17244553775527"/>
  </node>
  <node id="80677" label="1001101010" cy:nodeId="9655">
    <graphics z="0.0" y="-90.944923833129" x="-295.1977446100209"/>
  </node>
  <node id="80676" label="1000111010" cy:nodeId="9656">
    <graphics z="0.0" y="79.21784166980069" x="-450.7443754693959"/>
  </node>
  <node id="80675" label="1000101010" cy:nodeId="9657">
    <graphics z="0.0" y="19.721343561890535" x="-463.66187119693495"/>
  </node>
  <node id="80674" label="0010101010" cy:nodeId="9658">
    <graphics z="0.0" y="274.9739451854257" x="672.6709382513072"/>
  </node>
  <node id="80673" label="0001101010" cy:nodeId="9659">
    <graphics z="0.0" y="170.89456896472257" x="456.70270705013536"/>
  </node>
  <node id="80672" label="0000111010" cy:nodeId="9660">
    <graphics z="0.0" y="237.76621203112882" x="626.8343598821666"/>
  </node>
  <node id="80671" label="0000101010" cy:nodeId="9661">
    <graphics z="0.0" y="118.22779040026944" x="728.7100312688854"/>
  </node>
  <node id="80670" label="0001011001" cy:nodeId="9662">
    <graphics z="0.0" y="-38.961178258177824" x="-1611.1988432428334"/>
  </node>
  <node id="80669" label="0001010101" cy:nodeId="9663">
    <graphics z="0.0" y="81.64385180163663" x="-1592.5793058893178"/>
  </node>
  <node id="80668" label="0001010011" cy:nodeId="9664">
    <graphics z="0.0" y="2.8778148143319413" x="-1326.8467924615834"/>
  </node>
  <node id="80667" label="1001011001" cy:nodeId="9665">
    <graphics z="0.0" y="273.31055407214444" x="1428.7713744619396"/>
  </node>
  <node id="80666" label="1001010101" cy:nodeId="9666">
    <graphics z="0.0" y="225.5165477244882" x="1345.8995912054088"/>
  </node>
  <node id="80665" label="1001010011" cy:nodeId="9667">
    <graphics z="0.0" y="80.11435656237882" x="1373.9523789861705"/>
  </node>
  <node id="80664" label="0110011110" cy:nodeId="9668">
    <graphics z="0.0" y="143.7710185496835" x="420.8064591863658"/>
  </node>
  <node id="80663" label="1110011110" cy:nodeId="9669">
    <graphics z="0.0" y="-246.4106983692618" x="-555.4375517389271"/>
  </node>
  <node id="80662" label="0100100110" cy:nodeId="9670">
    <graphics z="0.0" y="-110.88422437023837" x="500.4517610052135"/>
  </node>
  <node id="80661" label="0111101010" cy:nodeId="9671">
    <graphics z="0.0" y="148.11228136706632" x="552.5264070013072"/>
  </node>
  <node id="80660" label="0010011110" cy:nodeId="9672">
    <graphics z="0.0" y="197.02512316394132" x="283.79420637874864"/>
  </node>
  <node id="80659" label="1111101010" cy:nodeId="9673">
    <graphics z="0.0" y="-49.439810231444426" x="-474.5508177301381"/>
  </node>
  <node id="80658" label="1100100110" cy:nodeId="9674">
    <graphics z="0.0" y="-29.599499181029387" x="-376.46965623111464"/>
  </node>
  <node id="80657" label="1010011110" cy:nodeId="9675">
    <graphics z="0.0" y="-88.00461240124423" x="-545.7041990777943"/>
  </node>
  <node id="80656" label="0000100110" cy:nodeId="9676">
    <graphics z="0.0" y="-159.99372144055087" x="368.7890489080455"/>
  </node>
  <node id="80655" label="1000100110" cy:nodeId="9677">
    <graphics z="0.0" y="-131.8778843433829" x="-382.57378220767714"/>
  </node>
  <node id="80654" label="0110011001" cy:nodeId="9678">
    <graphics z="0.0" y="21.02210192370694" x="-1312.3133757135365"/>
  </node>
  <node id="80653" label="0110010101" cy:nodeId="9679">
    <graphics z="0.0" y="-205.84880109142978" x="-1432.161123516271"/>
  </node>
  <node id="80652" label="0110010011" cy:nodeId="9680">
    <graphics z="0.0" y="-148.24656720471103" x="-1029.2138044855092"/>
  </node>
  <node id="80651" label="0110010001" cy:nodeId="9681">
    <graphics z="0.0" y="-64.5507587940665" x="-1120.314703228185"/>
  </node>
  <node id="80650" label="0111110001" cy:nodeId="9682">
    <graphics z="0.0" y="58.39429430651944" x="-1414.3177397272084"/>
  </node>
  <node id="80649" label="0111100101" cy:nodeId="9683">
    <graphics z="0.0" y="39.897483393433504" x="-1281.5951139947865"/>
  </node>
  <node id="80648" label="1110011001" cy:nodeId="9684">
    <graphics z="0.0" y="160.70081286120694" x="1490.0617234685924"/>
  </node>
  <node id="80647" label="1110010101" cy:nodeId="9685">
    <graphics z="0.0" y="125.41397814441007" x="1572.318094013026"/>
  </node>
  <node id="80646" label="1110010011" cy:nodeId="9686">
    <graphics z="0.0" y="84.30631212878507" x="1411.8855750539806"/>
  </node>
  <node id="80645" label="1110010001" cy:nodeId="9687">
    <graphics z="0.0" y="304.24207262683194" x="1433.5173509099986"/>
  </node>
  <node id="80644" label="1111110001" cy:nodeId="9688">
    <graphics z="0.0" y="78.10901598620694" x="1325.2340791204479"/>
  </node>
  <node id="80643" label="1111100101" cy:nodeId="9689">
    <graphics z="0.0" y="-22.714195683714934" x="1482.7449738958385"/>
  </node>
  <node id="80642" label="0100011110" cy:nodeId="9690">
    <graphics z="0.0" y="-66.22095532726962" x="329.5897424200084"/>
  </node>
  <node id="80641" label="1100011110" cy:nodeId="9691">
    <graphics z="0.0" y="0.6041102855233476" x="-693.7344801446889"/>
  </node>
  <node id="80640" label="0011101100" cy:nodeId="9692">
    <graphics z="0.0" y="14.425422236206941" x="470.7478654363658"/>
  </node>
  <node id="80639" label="1010011001" cy:nodeId="9693">
    <graphics z="0.0" y="160.97067980456632" x="1373.1871430852916"/>
  </node>
  <node id="80638" label="1010010101" cy:nodeId="9694">
    <graphics z="0.0" y="218.87293200183194" x="1448.7049615362193"/>
  </node>
  <node id="80637" label="1010010011" cy:nodeId="9695">
    <graphics z="0.0" y="218.49964098620694" x="1207.7194306829479"/>
  </node>
  <node id="80636" label="1010010001" cy:nodeId="9696">
    <graphics z="0.0" y="276.86780504870694" x="1242.2488954046275"/>
  </node>
  <node id="80635" label="1011110001" cy:nodeId="9697">
    <graphics z="0.0" y="160.80899767566007" x="1157.791513202479"/>
  </node>
  <node id="80634" label="1011100101" cy:nodeId="9698">
    <graphics z="0.0" y="-79.56766553234775" x="1366.484971759608"/>
  </node>
  <node id="80633" label="0010011001" cy:nodeId="9699">
    <graphics z="0.0" y="-117.83874364208896" x="-1252.7397978326771"/>
  </node>
  <node id="80632" label="0010010101" cy:nodeId="9700">
    <graphics z="0.0" y="-253.4262470753165" x="-1483.4613249322865"/>
  </node>
  <node id="80631" label="0010010011" cy:nodeId="9701">
    <graphics z="0.0" y="-155.26076550793368" x="-1258.8987791559193"/>
  </node>
  <node id="80630" label="0010010001" cy:nodeId="9702">
    <graphics z="0.0" y="-200.65763135266025" x="-1200.5667173883412"/>
  </node>
  <node id="80629" label="0101101010" cy:nodeId="9703">
    <graphics z="0.0" y="-130.87381787609775" x="528.148187396815"/>
  </node>
  <node id="80628" label="0011110001" cy:nodeId="9704">
    <graphics z="0.0" y="-70.43706174206454" x="-1436.3511869928334"/>
  </node>
  <node id="80627" label="0011100101" cy:nodeId="9705">
    <graphics z="0.0" y="-59.62211652111728" x="-1353.8757841608021"/>
  </node>
  <node id="80626" label="1011101100" cy:nodeId="9706">
    <graphics z="0.0" y="63.657203242066316" x="-386.7773344537709"/>
  </node>
  <node id="80625" label="1000011110" cy:nodeId="9707">
    <graphics z="0.0" y="156.49903063464444" x="-615.3832838556264"/>
  </node>
  <node id="80624" label="1101101010" cy:nodeId="9708">
    <graphics z="0.0" y="109.37107042956632" x="-495.7399809381459"/>
  </node>
  <node id="80623" label="0000011110" cy:nodeId="9709">
    <graphics z="0.0" y="169.44870714831632" x="440.9053742864635"/>
  </node>
  <node id="80622" label="0101010001" cy:nodeId="9710">
    <graphics z="0.0" y="211.21543078112882" x="-1447.3580534479115"/>
  </node>
  <node id="80621" label="0100011001" cy:nodeId="9711">
    <graphics z="0.0" y="198.57251696276944" x="-1400.868673565099"/>
  </node>
  <node id="80620" label="0100010101" cy:nodeId="9712">
    <graphics z="0.0" y="-68.26623769116122" x="-1377.0485289117787"/>
  </node>
  <node id="80619" label="0100010011" cy:nodeId="9713">
    <graphics z="0.0" y="213.30576281237882" x="-1195.4262220880482"/>
  </node>
  <node id="80618" label="0100010001" cy:nodeId="9714">
    <graphics z="0.0" y="165.2799754588632" x="-1384.3617765924428"/>
  </node>
  <node id="80617" label="0101110001" cy:nodeId="9715">
    <graphics z="0.0" y="179.19943957019132" x="-1342.1490538141225"/>
  </node>
  <node id="80616" label="0101100101" cy:nodeId="9716">
    <graphics z="0.0" y="190.06723742175382" x="-1344.1172850152943"/>
  </node>
  <node id="80615" label="1101010001" cy:nodeId="9717">
    <graphics z="0.0" y="253.0132518260507" x="1275.8203523138072"/>
  </node>
  <node id="80614" label="1100011001" cy:nodeId="9718">
    <graphics z="0.0" y="229.42188219714444" x="1278.8814637640025"/>
  </node>
  <node id="80613" label="1100010101" cy:nodeId="9719">
    <graphics z="0.0" y="172.72653917956632" x="1286.2130525091197"/>
  </node>
  <node id="80612" label="1100010011" cy:nodeId="9720">
    <graphics z="0.0" y="183.96347765612882" x="1389.8310143926647"/>
  </node>
  <node id="80611" label="1100010001" cy:nodeId="9721">
    <graphics z="0.0" y="267.45618395495694" x="1118.4559113958385"/>
  </node>
  <node id="80610" label="1101110001" cy:nodeId="9722">
    <graphics z="0.0" y="-7.771080449339934" x="1118.7721650579479"/>
  </node>
  <node id="80609" label="1101100101" cy:nodeId="9723">
    <graphics z="0.0" y="-62.65221448254306" x="1278.7613618352916"/>
  </node>
  <node id="80608" label="1011100001" cy:nodeId="9724">
    <graphics z="0.0" y="5.372443720581941" x="1145.5816743352916"/>
  </node>
  <node id="80607" label="1001110001" cy:nodeId="9725">
    <graphics z="0.0" y="16.56030993151944" x="1153.8450410345104"/>
  </node>
  <node id="80606" label="1001100101" cy:nodeId="9726">
    <graphics z="0.0" y="-177.3241505176993" x="1263.732171771815"/>
  </node>
  <node id="80605" label="0011100001" cy:nodeId="9727">
    <graphics z="0.0" y="159.02915148425382" x="-1334.1360838434193"/>
  </node>
  <node id="80604" label="0001110001" cy:nodeId="9728">
    <graphics z="0.0" y="144.624656244996" x="-1439.9303801080678"/>
  </node>
  <node id="80603" label="0001100101" cy:nodeId="9729">
    <graphics z="0.0" y="101.41638903308194" x="-1430.5406401178334"/>
  </node>
  <node id="80602" label="0001010001" cy:nodeId="9730">
    <graphics z="0.0" y="172.20371203112882" x="-1573.1881315729115"/>
  </node>
  <node id="80601" label="0000011001" cy:nodeId="9731">
    <graphics z="0.0" y="-124.57581563305575" x="-1311.1634733697865"/>
  </node>
  <node id="80600" label="0000010101" cy:nodeId="9732">
    <graphics z="0.0" y="-95.01555760216434" x="-1459.9418241998646"/>
  </node>
  <node id="80599" label="0000010011" cy:nodeId="9733">
    <graphics z="0.0" y="-32.08308835339267" x="-1050.8210890314076"/>
  </node>
  <node id="80598" label="0000010001" cy:nodeId="9734">
    <graphics z="0.0" y="80.11235766101163" x="-1360.8438169977162"/>
  </node>
  <node id="80597" label="1001010001" cy:nodeId="9735">
    <graphics z="0.0" y="215.3049998729257" x="1253.5130097845104"/>
  </node>
  <node id="80596" label="1000011001" cy:nodeId="9736">
    <graphics z="0.0" y="121.62354235339444" x="1212.02099013119"/>
  </node>
  <node id="80595" label="1000010101" cy:nodeId="9737">
    <graphics z="0.0" y="271.9267039744882" x="1300.9574220159557"/>
  </node>
  <node id="80594" label="1000010011" cy:nodeId="9738">
    <graphics z="0.0" y="85.24936632800382" x="1268.4566590765025"/>
  </node>
  <node id="80593" label="1000010001" cy:nodeId="9739">
    <graphics z="0.0" y="250.20069079089444" x="1088.367440936854"/>
  </node>
  <node id="80592" label="0110110001" cy:nodeId="9740">
    <graphics z="0.0" y="-17.854294255492277" x="-1182.3884794733021"/>
  </node>
  <node id="80591" label="0110100101" cy:nodeId="9741">
    <graphics z="0.0" y="-6.194260075804777" x="-1136.5568430444691"/>
  </node>
  <node id="80590" label="0110100001" cy:nodeId="9742">
    <graphics z="0.0" y="177.46738390612882" x="-1055.5657484552357"/>
  </node>
  <node id="80589" label="1110110001" cy:nodeId="9743">
    <graphics z="0.0" y="108.39517931628507" x="1313.4231202581432"/>
  </node>
  <node id="80588" label="1110100101" cy:nodeId="9744">
    <graphics z="0.0" y="-201.42919202160556" x="1294.7904984930065"/>
  </node>
  <node id="80587" label="0110101100" cy:nodeId="9745">
    <graphics z="0.0" y="79.60251574206632" x="643.762918231776"/>
  </node>
  <node id="80586" label="0100101100" cy:nodeId="9746">
    <graphics z="0.0" y="-169.16593213391025" x="661.4814546087291"/>
  </node>
  <node id="80585" label="1110101100" cy:nodeId="9747">
    <graphics z="0.0" y="121.87949328112882" x="-676.6419165155385"/>
  </node>
  <node id="80584" label="1110100001" cy:nodeId="9748">
    <graphics z="0.0" y="86.25321154284757" x="1073.9654023626354"/>
  </node>
  <node id="80583" label="1010110001" cy:nodeId="9749">
    <graphics z="0.0" y="100.83255724597257" x="1031.901132343104"/>
  </node>
  <node id="80582" label="1010100101" cy:nodeId="9750">
    <graphics z="0.0" y="64.01941637683194" x="1173.6606843450572"/>
  </node>
  <node id="80581" label="0010110001" cy:nodeId="9751">
    <graphics z="0.0" y="-125.33204312634189" x="-1112.334306957433"/>
  </node>
  <node id="80580" label="0010100101" cy:nodeId="9752">
    <graphics z="0.0" y="-46.63330121350009" x="-1211.7457487604115"/>
  </node>
  <node id="80579" label="1100101100" cy:nodeId="9753">
    <graphics z="0.0" y="249.31592516589444" x="-738.6485502740834"/>
  </node>
  <node id="80578" label="1010101100" cy:nodeId="9754">
    <graphics z="0.0" y="-78.81384034466464" x="-573.4092848321889"/>
  </node>
  <node id="80577" label="1001101100" cy:nodeId="9755">
    <graphics z="0.0" y="309.8997569530038" x="-335.2364714166615"/>
  </node>
  <node id="80576" label="1000101100" cy:nodeId="9756">
    <graphics z="0.0" y="256.48160509753507" x="-594.4685423395131"/>
  </node>
  <node id="80575" label="0010101100" cy:nodeId="9757">
    <graphics z="0.0" y="79.58331255603116" x="675.4744966009166"/>
  </node>
  <node id="80574" label="0001101100" cy:nodeId="9758">
    <graphics z="0.0" y="-69.03205151867587" x="423.3584763982799"/>
  </node>
  <node id="80573" label="0000101100" cy:nodeId="9759">
    <graphics z="0.0" y="-5.692219212767668" x="671.7327973821666"/>
  </node>
  <node id="80572" label="0111101100" cy:nodeId="9760">
    <graphics z="0.0" y="305.23902086901944" x="598.7168214300182"/>
  </node>
  <node id="80571" label="0111001110" cy:nodeId="9761">
    <graphics z="0.0" y="32.296382471802644" x="284.7760865667369"/>
  </node>
  <node id="80570" label="1111101100" cy:nodeId="9762">
    <graphics z="0.0" y="-18.144073918578215" x="-532.3492262384389"/>
  </node>
  <node id="80569" label="1111001110" cy:nodeId="9763">
    <graphics z="0.0" y="3.092032953980379" x="-419.4673979303334"/>
  </node>
  <node id="80568" label="0100110001" cy:nodeId="9764">
    <graphics z="0.0" y="106.04761461901944" x="-1125.8347389718983"/>
  </node>
  <node id="80567" label="0100100101" cy:nodeId="9765">
    <graphics z="0.0" y="113.64791063952725" x="-1090.0216581842396"/>
  </node>
  <node id="80566" label="0100100001" cy:nodeId="9766">
    <graphics z="0.0" y="229.04288439441007" x="-1067.5296843072865"/>
  </node>
  <node id="80565" label="1100110001" cy:nodeId="9767">
    <graphics z="0.0" y="66.96665148425382" x="1094.7533051946666"/>
  </node>
  <node id="80564" label="1100100101" cy:nodeId="9768">
    <graphics z="0.0" y="-109.53011365246493" x="1200.3568665960338"/>
  </node>
  <node id="80563" label="0011001110" cy:nodeId="9769">
    <graphics z="0.0" y="122.58350329089444" x="293.98473524837755"/>
  </node>
  <node id="80562" label="1011001110" cy:nodeId="9770">
    <graphics z="0.0" y="61.01007036853116" x="-356.82976365298964"/>
  </node>
  <node id="80561" label="1100100001" cy:nodeId="9771">
    <graphics z="0.0" y="25.906470820191316" x="1039.4492585638072"/>
  </node>
  <node id="80560" label="1010100001" cy:nodeId="9772">
    <graphics z="0.0" y="85.08664660144132" x="1012.3624360540416"/>
  </node>
  <node id="80559" label="1001100001" cy:nodeId="9773">
    <graphics z="0.0" y="-131.20180554699618" x="1117.5922334173229"/>
  </node>
  <node id="80558" label="1000110001" cy:nodeId="9774">
    <graphics z="0.0" y="68.84198717761319" x="982.1279389837291"/>
  </node>
  <node id="80557" label="1000100101" cy:nodeId="9775">
    <graphics z="0.0" y="-74.04793591808993" x="1057.792703388026"/>
  </node>
  <node id="80556" label="1000100001" cy:nodeId="9776">
    <graphics z="0.0" y="21.47559313464444" x="956.3554780462291"/>
  </node>
  <node id="80555" label="0010100001" cy:nodeId="9777">
    <graphics z="0.0" y="-25.303734257933684" x="-978.4567625543568"/>
  </node>
  <node id="80554" label="0001100001" cy:nodeId="9778">
    <graphics z="0.0" y="289.2776561229257" x="-1378.6349394342396"/>
  </node>
  <node id="80553" label="0000110001" cy:nodeId="9779">
    <graphics z="0.0" y="79.8835673778085" x="-1190.400671245763"/>
  </node>
  <node id="80552" label="0000100101" cy:nodeId="9780">
    <graphics z="0.0" y="131.97319750476163" x="-1110.1281454584096"/>
  </node>
  <node id="80551" label="0000100001" cy:nodeId="9781">
    <graphics z="0.0" y="32.39539293933194" x="-1214.0957930108998"/>
  </node>
  <node id="80550" label="0111100001" cy:nodeId="9782">
    <graphics z="0.0" y="206.09635119128507" x="-1222.722791912267"/>
  </node>
  <node id="80549" label="0111000101" cy:nodeId="9783">
    <graphics z="0.0" y="96.01476244616788" x="-1391.857900860021"/>
  </node>
  <node id="80548" label="0111000011" cy:nodeId="9784">
    <graphics z="0.0" y="226.01135973620694" x="-1207.9660246393178"/>
  </node>
  <node id="80547" label="0111000001" cy:nodeId="9785">
    <graphics z="0.0" y="299.73316149401944" x="-1363.387472393224"/>
  </node>
  <node id="80546" label="1111100001" cy:nodeId="9786">
    <graphics z="0.0" y="62.65985827136319" x="1249.4949433782604"/>
  </node>
  <node id="80545" label="1111000101" cy:nodeId="9787">
    <graphics z="0.0" y="53.08252672839444" x="1486.7086961248424"/>
  </node>
  <node id="80544" label="1111000011" cy:nodeId="9788">
    <graphics z="0.0" y="-52.106895879027434" x="1415.4374597051647"/>
  </node>
  <node id="80543" label="0111001100" cy:nodeId="9789">
    <graphics z="0.0" y="-74.83758588146884" x="527.1661927679088"/>
  </node>
  <node id="80542" label="0101101100" cy:nodeId="9790">
    <graphics z="0.0" y="-170.79224438976962" x="401.2437379339244"/>
  </node>
  <node id="80541" label="0101001110" cy:nodeId="9791">
    <graphics z="0.0" y="-193.041115239379" x="317.29543852596544"/>
  </node>
  <node id="80540" label="1111001100" cy:nodeId="9792">
    <graphics z="0.0" y="83.37287096667569" x="-442.0964109918568"/>
  </node>
  <node id="80539" label="1101101100" cy:nodeId="9793">
    <graphics z="0.0" y="250.22898058581632" x="-481.23401475162245"/>
  </node>
  <node id="80538" label="1101001110" cy:nodeId="9794">
    <graphics z="0.0" y="181.63431505847257" x="-483.45842576236464"/>
  </node>
  <node id="80537" label="1111000001" cy:nodeId="9795">
    <graphics z="0.0" y="146.61649279284757" x="1526.4637086370494"/>
  </node>
  <node id="80536" label="1011000101" cy:nodeId="9796">
    <graphics z="0.0" y="97.92233996081632" x="1450.797269580653"/>
  </node>
  <node id="80535" label="1011000011" cy:nodeId="9797">
    <graphics z="0.0" y="15.643012568238191" x="1404.5250089147594"/>
  </node>
  <node id="80534" label="1011000001" cy:nodeId="9798">
    <graphics z="0.0" y="187.89063219714444" x="1277.7621247747447"/>
  </node>
  <node id="80533" label="0111110010" cy:nodeId="9799">
    <graphics z="0.0" y="171.57251696276944" x="340.7696092107799"/>
  </node>
  <node id="80532" label="0011001100" cy:nodeId="9800">
    <graphics z="0.0" y="28.915122553589754" x="427.266580341151"/>
  </node>
  <node id="80531" label="0001001110" cy:nodeId="9801">
    <graphics z="0.0" y="-14.478321507689543" x="402.2603318670299"/>
  </node>
  <node id="80530" label="0011000101" cy:nodeId="9802">
    <graphics z="0.0" y="-28.595978215453215" x="-1411.3540861627553"/>
  </node>
  <node id="80529" label="0011000011" cy:nodeId="9803">
    <graphics z="0.0" y="204.23282580066007" x="-1378.93848252506"/>
  </node>
  <node id="80528" label="0011000001" cy:nodeId="9804">
    <graphics z="0.0" y="166.68985705066007" x="-1331.8077452203725"/>
  </node>
  <node id="80527" label="1011001100" cy:nodeId="9805">
    <graphics z="0.0" y="102.11528734851163" x="-205.15617966861464"/>
  </node>
  <node id="80526" label="1001001110" cy:nodeId="9806">
    <graphics z="0.0" y="242.95859484362882" x="-308.035665752599"/>
  </node>
  <node id="80525" label="1111110010" cy:nodeId="9807">
    <graphics z="0.0" y="-313.4420399219962" x="-532.010519268224"/>
  </node>
  <node id="80524" label="0011110010" cy:nodeId="9808">
    <graphics z="0.0" y="295.2245555369882" x="240.93211531429552"/>
  </node>
  <node id="80523" label="1011110010" cy:nodeId="9809">
    <graphics z="0.0" y="-365.1522755176993" x="-400.97331834048964"/>
  </node>
  <node id="80522" label="0101100001" cy:nodeId="9810">
    <graphics z="0.0" y="303.11951403308194" x="-1260.8026945611928"/>
  </node>
  <node id="80521" label="0101000101" cy:nodeId="9811">
    <graphics z="0.0" y="280.5356212108163" x="-1472.847433330724"/>
  </node>
  <node id="80520" label="0101000011" cy:nodeId="9812">
    <graphics z="0.0" y="296.9962840526132" x="-1240.6019880792592"/>
  </node>
  <node id="80519" label="1101100001" cy:nodeId="9813">
    <graphics z="0.0" y="-18.594749882933684" x="1319.6228654363658"/>
  </node>
  <node id="80518" label="1101000101" cy:nodeId="9814">
    <graphics z="0.0" y="89.21820788073819" x="1325.9614121892955"/>
  </node>
  <node id="80517" label="1101000011" cy:nodeId="9815">
    <graphics z="0.0" y="-14.197929814574309" x="1444.6151444891002"/>
  </node>
  <node id="80516" label="0111111100" cy:nodeId="9816">
    <graphics z="0.0" y="45.520103022339754" x="440.468728778651"/>
  </node>
  <node id="80515" label="1111111100" cy:nodeId="9817">
    <graphics z="0.0" y="155.37767748523038" x="-702.1626951715443"/>
  </node>
  <node id="80514" label="0101110010" cy:nodeId="9818">
    <graphics z="0.0" y="180.6821971385507" x="286.47013258724473"/>
  </node>
  <node id="80513" label="1001000101" cy:nodeId="9819">
    <graphics z="0.0" y="6.920356318238191" x="1269.9095704534557"/>
  </node>
  <node id="80512" label="1001000011" cy:nodeId="9820">
    <graphics z="0.0" y="-132.87055249523837" x="1309.9270188787486"/>
  </node>
  <node id="80511" label="0011111100" cy:nodeId="9821">
    <graphics z="0.0" y="-201.4038624317618" x="280.8340623357799"/>
  </node>
  <node id="80510" label="1110001110" cy:nodeId="9822">
    <graphics z="0.0" y="-136.34374280285556" x="-610.837610485265"/>
  </node>
  <node id="80509" label="1011111100" cy:nodeId="9823">
    <graphics z="0.0" y="54.640410944703035" x="-434.3317625543568"/>
  </node>
  <node id="80508" label="0001000101" cy:nodeId="9824">
    <graphics z="0.0" y="194.03574328112882" x="-1504.1424772760365"/>
  </node>
  <node id="80507" label="0001000011" cy:nodeId="9825">
    <graphics z="0.0" y="130.30843310046475" x="-1223.33106065006"/>
  </node>
  <node id="80506" label="0110001110" cy:nodeId="9826">
    <graphics z="0.0" y="7.546645685913973" x="593.0241334417369"/>
  </node>
  <node id="80505" label="1101110010" cy:nodeId="9827">
    <graphics z="0.0" y="-117.15209622692782" x="-481.30721116275527"/>
  </node>
  <node id="80504" label="0011100010" cy:nodeId="9828">
    <graphics z="0.0" y="117.7719951121835" x="367.8082654455211"/>
  </node>
  <node id="80503" label="0001110010" cy:nodeId="9829">
    <graphics z="0.0" y="216.82927660632413" x="332.5720174291637"/>
  </node>
  <node id="80502" label="0010001110" cy:nodeId="9830">
    <graphics z="0.0" y="157.3040233104257" x="477.603868243983"/>
  </node>
  <node id="80501" label="1011100010" cy:nodeId="9831">
    <graphics z="0.0" y="-273.15160413098056" x="-228.15263962955214"/>
  </node>
  <node id="80500" label="1001110010" cy:nodeId="9832">
    <graphics z="0.0" y="-56.775283292052336" x="-409.94560837955214"/>
  </node>
  <node id="80499" label="1010001110" cy:nodeId="9833">
    <graphics z="0.0" y="-33.18360944103915" x="-488.42371201724745"/>
  </node>
  <node id="80498" label="1111010110" cy:nodeId="9834">
    <graphics z="0.0" y="-127.76148648571689" x="-256.48360276431777"/>
  </node>
  <node id="80497" label="0111010110" cy:nodeId="9835">
    <graphics z="0.0" y="90.08898882556241" x="163.83968519954942"/>
  </node>
  <node id="80496" label="1011010110" cy:nodeId="9836">
    <graphics z="0.0" y="-187.0164112598868" x="-316.02608323306777"/>
  </node>
  <node id="80495" label="0011010110" cy:nodeId="9837">
    <graphics z="0.0" y="127.61104540515225" x="112.81051039486192"/>
  </node>
  <node id="80494" label="0101111100" cy:nodeId="9838">
    <graphics z="0.0" y="-75.93298764538486" x="437.6925065496471"/>
  </node>
  <node id="80493" label="1101111100" cy:nodeId="9839">
    <graphics z="0.0" y="278.6235118358163" x="-631.588623287389"/>
  </node>
  <node id="80492" label="0110000101" cy:nodeId="9840">
    <graphics z="0.0" y="-137.86430402111728" x="-1271.2025358697865"/>
  </node>
  <node id="80491" label="0110000011" cy:nodeId="9841">
    <graphics z="0.0" y="-16.01818890881259" x="-998.8220732233021"/>
  </node>
  <node id="80490" label="0110000001" cy:nodeId="9842">
    <graphics z="0.0" y="123.77812914538663" x="-1368.979025127599"/>
  </node>
  <node id="80489" label="1110000101" cy:nodeId="9843">
    <graphics z="0.0" y="-1.7650990040274337" x="1397.6177766302135"/>
  </node>
  <node id="80488" label="1110000011" cy:nodeId="9844">
    <graphics z="0.0" y="-27.228355839964934" x="1250.2650392034557"/>
  </node>
  <node id="80487" label="0110001100" cy:nodeId="9845">
    <graphics z="0.0" y="-163.5829853565665" x="468.6694886663463"/>
  </node>
  <node id="80486" label="0101001100" cy:nodeId="9846">
    <graphics z="0.0" y="-260.0554737598868" x="457.8106782415416"/>
  </node>
  <node id="80485" label="0100001110" cy:nodeId="9847">
    <graphics z="0.0" y="-208.691505864379" x="479.36393141536973"/>
  </node>
  <node id="80484" label="0100001100" cy:nodeId="9848">
    <graphics z="0.0" y="-264.5017323048087" x="574.3702790716197"/>
  </node>
  <node id="80483" label="0001111100" cy:nodeId="9849">
    <graphics z="0.0" y="36.14428667712491" x="241.97066664486192"/>
  </node>
  <node id="80482" label="1110001100" cy:nodeId="9850">
    <graphics z="0.0" y="157.48364977526944" x="-574.5897276422475"/>
  </node>
  <node id="80481" label="1101001100" cy:nodeId="9851">
    <graphics z="0.0" y="365.62769274401944" x="-416.0655424615834"/>
  </node>
  <node id="80480" label="1100001110" cy:nodeId="9852">
    <graphics z="0.0" y="-36.17510266613681" x="-526.5065825006459"/>
  </node>
  <node id="80479" label="1001111100" cy:nodeId="9853">
    <graphics z="0.0" y="315.4424510448007" x="-562.1070463678334"/>
  </node>
  <node id="80478" label="0010000101" cy:nodeId="9854">
    <graphics z="0.0" y="-171.09173627209384" x="-1374.3376219293568"/>
  </node>
  <node id="80477" label="0010000011" cy:nodeId="9855">
    <graphics z="0.0" y="58.755164667847566" x="-1205.937292339513"/>
  </node>
  <node id="80476" label="0010000001" cy:nodeId="9856">
    <graphics z="0.0" y="-77.95651192974765" x="-1292.3812925836537"/>
  </node>
  <node id="80475" label="1110000001" cy:nodeId="9857">
    <graphics z="0.0" y="91.46485094714444" x="1269.8168427923229"/>
  </node>
  <node id="80474" label="1010000101" cy:nodeId="9858">
    <graphics z="0.0" y="199.40091662097257" x="1321.1037995794322"/>
  </node>
  <node id="80473" label="1010000011" cy:nodeId="9859">
    <graphics z="0.0" y="50.702308222535066" x="1214.36229872494"/>
  </node>
  <node id="80472" label="1010000001" cy:nodeId="9860">
    <graphics z="0.0" y="200.64548449206632" x="1119.0813386419322"/>
  </node>
  <node id="80471" label="0110110010" cy:nodeId="9861">
    <graphics z="0.0" y="295.0805430858163" x="424.8206880071666"/>
  </node>
  <node id="80470" label="0110100010" cy:nodeId="9862">
    <graphics z="0.0" y="27.64307360339444" x="618.361306903651"/>
  </node>
  <node id="80469" label="0010001100" cy:nodeId="9863">
    <graphics z="0.0" y="-24.794077351805754" x="487.2226808050182"/>
  </node>
  <node id="80468" label="0001001100" cy:nodeId="9864">
    <graphics z="0.0" y="-187.48835034680087" x="441.20167708187364"/>
  </node>
  <node id="80467" label="0000001110" cy:nodeId="9865">
    <graphics z="0.0" y="-57.16686292004306" x="549.6992738225963"/>
  </node>
  <node id="80466" label="0000001100" cy:nodeId="9866">
    <graphics z="0.0" y="-91.81781049084384" x="593.6087586858775"/>
  </node>
  <node id="80465" label="1100001100" cy:nodeId="9867">
    <graphics z="0.0" y="229.58463244128507" x="-677.6801283380482"/>
  </node>
  <node id="80464" label="1010001100" cy:nodeId="9868">
    <graphics z="0.0" y="92.98480944323819" x="-308.36626267642714"/>
  </node>
  <node id="80463" label="1001001100" cy:nodeId="9869">
    <graphics z="0.0" y="286.0423350780038" x="-167.29683518619277"/>
  </node>
  <node id="80462" label="1000001110" cy:nodeId="9870">
    <graphics z="0.0" y="281.4208751170663" x="-298.64177537173964"/>
  </node>
  <node id="80461" label="1000001100" cy:nodeId="9871">
    <graphics z="0.0" y="276.4437022655038" x="-361.55327439517714"/>
  </node>
  <node id="80460" label="1110110010" cy:nodeId="9872">
    <graphics z="0.0" y="-268.08527417492587" x="-637.7097761651967"/>
  </node>
  <node id="80459" label="1111010100" cy:nodeId="9873">
    <graphics z="0.0" y="137.74336962390225" x="-382.232687236974"/>
  </node>
  <node id="80458" label="1101010110" cy:nodeId="9874">
    <graphics z="0.0" y="-35.811296895262785" x="-398.8276274225209"/>
  </node>
  <node id="80457" label="0111010100" cy:nodeId="9875">
    <graphics z="0.0" y="-195.37964673351962" x="219.72190260677598"/>
  </node>
  <node id="80456" label="0101010110" cy:nodeId="9876">
    <graphics z="0.0" y="-91.84780927014071" x="55.82831740169786"/>
  </node>
  <node id="80455" label="0010110010" cy:nodeId="9877">
    <graphics z="0.0" y="381.6637645213632" x="488.3306519964244"/>
  </node>
  <node id="80454" label="1110100010" cy:nodeId="9878">
    <graphics z="0.0" y="-282.5993732960196" x="-452.6336882135365"/>
  </node>
  <node id="80453" label="1010110010" cy:nodeId="9879">
    <graphics z="0.0" y="-375.45186658215243" x="-531.3197386285756"/>
  </node>
  <node id="80452" label="1011010100" cy:nodeId="9880">
    <graphics z="0.0" y="29.793548151734285" x="-313.44316697330214"/>
  </node>
  <node id="80451" label="1001010110" cy:nodeId="9881">
    <graphics z="0.0" y="74.70023302722257" x="-337.18343186588027"/>
  </node>
  <node id="80450" label="0011010100" cy:nodeId="9882">
    <graphics z="0.0" y="-28.66550107311923" x="290.50589918880723"/>
  </node>
  <node id="80449" label="0001010110" cy:nodeId="9883">
    <graphics z="0.0" y="36.38843493151944" x="126.18026137142442"/>
  </node>
  <node id="80448" label="0101000001" cy:nodeId="9884">
    <graphics z="0.0" y="372.7696299998788" x="-1426.6143095514271"/>
  </node>
  <node id="80447" label="0100000101" cy:nodeId="9885">
    <graphics z="0.0" y="74.72483019519132" x="-1386.660177471349"/>
  </node>
  <node id="80446" label="0100000011" cy:nodeId="9886">
    <graphics z="0.0" y="285.74426989245694" x="-1124.7150604745839"/>
  </node>
  <node id="80445" label="0100000001" cy:nodeId="9887">
    <graphics z="0.0" y="239.83020739245694" x="-1368.0667631647084"/>
  </node>
  <node id="80444" label="1101000001" cy:nodeId="9888">
    <graphics z="0.0" y="207.1609569041757" x="1241.6712281682994"/>
  </node>
  <node id="80443" label="1100000101" cy:nodeId="9889">
    <graphics z="0.0" y="172.35196642566007" x="1192.2705323675182"/>
  </node>
  <node id="80442" label="1100000011" cy:nodeId="9890">
    <graphics z="0.0" y="138.18396715808194" x="1309.1390931585338"/>
  </node>
  <node id="80441" label="0110111100" cy:nodeId="9891">
    <graphics z="0.0" y="124.79634813952725" x="548.3014314153697"/>
  </node>
  <node id="80440" label="1110111100" cy:nodeId="9892">
    <graphics z="0.0" y="34.760283991578035" x="-789.29443955631"/>
  </node>
  <node id="80439" label="1100000001" cy:nodeId="9893">
    <graphics z="0.0" y="173.3662791698007" x="1040.6527497747447"/>
  </node>
  <node id="80438" label="1001000001" cy:nodeId="9894">
    <graphics z="0.0" y="109.65479235339444" x="1072.6829621770885"/>
  </node>
  <node id="80437" label="1000000101" cy:nodeId="9895">
    <graphics z="0.0" y="148.73819689441007" x="1103.4561555364635"/>
  </node>
  <node id="80436" label="1000000011" cy:nodeId="9896">
    <graphics z="0.0" y="-20.276390507933684" x="1010.3930146673229"/>
  </node>
  <node id="80435" label="1000000001" cy:nodeId="9897">
    <graphics z="0.0" y="189.96543078112882" x="935.7439668157604"/>
  </node>
  <node id="80434" label="0001000001" cy:nodeId="9898">
    <graphics z="0.0" y="241.69272570300382" x="-1590.790792705724"/>
  </node>
  <node id="80433" label="0000000101" cy:nodeId="9899">
    <graphics z="0.0" y="287.2987742869882" x="-1312.232443096349"/>
  </node>
  <node id="80432" label="0000000011" cy:nodeId="9900">
    <graphics z="0.0" y="154.72779040026944" x="-1172.5968687555287"/>
  </node>
  <node id="80431" label="0000000001" cy:nodeId="9901">
    <graphics z="0.0" y="-0.3696674854727462" x="-1435.6990568658803"/>
  </node>
  <node id="80430" label="0100110010" cy:nodeId="9902">
    <graphics z="0.0" y="213.71837572741788" x="472.8930528142955"/>
  </node>
  <node id="80429" label="0100100010" cy:nodeId="9903">
    <graphics z="0.0" y="58.99889330554288" x="447.6706635931041"/>
  </node>
  <node id="80428" label="0010111100" cy:nodeId="9904">
    <graphics z="0.0" y="69.51989702868741" x="549.5853822210338"/>
  </node>
  <node id="80427" label="1100110010" cy:nodeId="9905">
    <graphics z="0.0" y="-107.31388898205478" x="-571.2022459527943"/>
  </node>
  <node id="80426" label="1010111100" cy:nodeId="9906">
    <graphics z="0.0" y="53.12432818103116" x="-692.8992750665639"/>
  </node>
  <node id="80425" label="0010100010" cy:nodeId="9907">
    <graphics z="0.0" y="184.20206408191007" x="442.7768418767955"/>
  </node>
  <node id="80424" label="0001100010" cy:nodeId="9908">
    <graphics z="0.0" y="-39.06780858349521" x="350.3624179342296"/>
  </node>
  <node id="80423" label="0000110010" cy:nodeId="9909">
    <graphics z="0.0" y="153.08626513171475" x="627.4881684759166"/>
  </node>
  <node id="80422" label="0000100010" cy:nodeId="9910">
    <graphics z="0.0" y="-17.389910176512785" x="505.2800385931041"/>
  </node>
  <node id="80421" label="1100100010" cy:nodeId="9911">
    <graphics z="0.0" y="-77.83763642620761" x="-365.50984788150527"/>
  </node>
  <node id="80420" label="1010100010" cy:nodeId="9912">
    <graphics z="0.0" y="-320.0694660694571" x="-385.624044658849"/>
  </node>
  <node id="80419" label="1001100010" cy:nodeId="9913">
    <graphics z="0.0" y="-118.7289814503165" x="-208.50420212955214"/>
  </node>
  <node id="80418" label="1000110010" cy:nodeId="9914">
    <graphics z="0.0" y="-189.23578687023837" x="-504.3675291559193"/>
  </node>
  <node id="80417" label="1000100010" cy:nodeId="9915">
    <graphics z="0.0" y="-167.75159497570712" x="-404.21546006412245"/>
  </node>
  <node id="80416" label="1110010110" cy:nodeId="9916">
    <graphics z="0.0" y="-266.60138745617587" x="-456.1615202447865"/>
  </node>
  <node id="80415" label="0110010110" cy:nodeId="9917">
    <graphics z="0.0" y="8.158164545777254" x="114.08483290462755"/>
  </node>
  <node id="80414" label="0111110100" cy:nodeId="9918">
    <graphics z="0.0" y="-118.99705548596103" x="388.62250685482286"/>
  </node>
  <node id="80413" label="1111110100" cy:nodeId="9919">
    <graphics z="0.0" y="-29.79007382702548" x="-581.7422010919545"/>
  </node>
  <node id="80412" label="1010010110" cy:nodeId="9920">
    <graphics z="0.0" y="-221.47777600598056" x="-473.7889616510365"/>
  </node>
  <node id="80411" label="0010010110" cy:nodeId="9921">
    <graphics z="0.0" y="105.07683520007413" x="240.89206862240098"/>
  </node>
  <node id="80410" label="0111100010" cy:nodeId="9922">
    <graphics z="0.0" y="-3.3163990528555587" x="386.4561402776744"/>
  </node>
  <node id="80409" label="0100111100" cy:nodeId="9923">
    <graphics z="0.0" y="-64.9052624256583" x="622.3794343450572"/>
  </node>
  <node id="80408" label="0011110100" cy:nodeId="9924">
    <graphics z="0.0" y="-36.36432690930087" x="237.53566908626817"/>
  </node>
  <node id="80407" label="1011110100" cy:nodeId="9925">
    <graphics z="0.0" y="-144.71830029797275" x="-497.6487181207631"/>
  </node>
  <node id="80406" label="1100111100" cy:nodeId="9926">
    <graphics z="0.0" y="124.40172533679288" x="-750.000997783849"/>
  </node>
  <node id="80405" label="1111100010" cy:nodeId="9927">
    <graphics z="0.0" y="-217.23693127941806" x="-271.5494291803334"/>
  </node>
  <node id="80404" label="0000111100" cy:nodeId="9928">
    <graphics z="0.0" y="54.73607592273038" x="490.3956086614635"/>
  </node>
  <node id="80403" label="1000111100" cy:nodeId="9929">
    <graphics z="0.0" y="145.12621264148038" x="-541.1878492853139"/>
  </node>
  <node id="80402" label="1110010100" cy:nodeId="9930">
    <graphics z="0.0" y="-13.700874760863371" x="-578.2757322809193"/>
  </node>
  <node id="80401" label="1101010100" cy:nodeId="9931">
    <graphics z="0.0" y="156.15317492175382" x="-437.67314744205214"/>
  </node>
  <node id="80400" label="1100010110" cy:nodeId="9932">
    <graphics z="0.0" y="-66.70339818310458" x="-493.37251877994277"/>
  </node>
  <node id="80399" label="1100010100" cy:nodeId="9933">
    <graphics z="0.0" y="151.9785838573007" x="-529.9775373956654"/>
  </node>
  <node id="80398" label="0110010100" cy:nodeId="9934">
    <graphics z="0.0" y="-83.73229642224032" x="277.42174696712755"/>
  </node>
  <node id="80397" label="0101010100" cy:nodeId="9935">
    <graphics z="0.0" y="-268.49996228527743" x="178.76127028255723"/>
  </node>
  <node id="80396" label="0100010110" cy:nodeId="9936">
    <graphics z="0.0" y="-145.76345105480868" x="171.26827406673692"/>
  </node>
  <node id="80395" label="0100010100" cy:nodeId="9937">
    <graphics z="0.0" y="-221.959083989379" x="399.5060784795787"/>
  </node>
  <node id="80394" label="1111011100" cy:nodeId="9938">
    <graphics z="0.0" y="129.721580073121" x="-548.0923674127553"/>
  </node>
  <node id="80393" label="1111011010" cy:nodeId="9939">
    <graphics z="0.0" y="-180.00922437023837" x="-411.8461058160756"/>
  </node>
  <node id="80392" label="0111011100" cy:nodeId="9940">
    <graphics z="0.0" y="-22.001503422972746" x="406.9197213628795"/>
  </node>
  <node id="80391" label="0111011010" cy:nodeId="9941">
    <graphics z="0.0" y="252.24698595691007" x="287.4130876043346"/>
  </node>
  <node id="80390" label="0101110100" cy:nodeId="9942">
    <graphics z="0.0" y="-292.87999768566806" x="338.8865659215953"/>
  </node>
  <node id="80389" label="1101110100" cy:nodeId="9943">
    <graphics z="0.0" y="84.69489245105069" x="-607.184721233556"/>
  </node>
  <node id="80388" label="1010010100" cy:nodeId="9944">
    <graphics z="0.0" y="-17.980247929808684" x="-423.58943772525527"/>
  </node>
  <node id="80387" label="1001010100" cy:nodeId="9945">
    <graphics z="0.0" y="205.9937205760507" x="-346.0594389459584"/>
  </node>
  <node id="80386" label="1000010110" cy:nodeId="9946">
    <graphics z="0.0" y="-145.9076923878165" x="-536.5129301568959"/>
  </node>
  <node id="80385" label="1000010100" cy:nodeId="9947">
    <graphics z="0.0" y="86.99936632800382" x="-475.136984111974"/>
  </node>
  <node id="80384" label="0010010100" cy:nodeId="9948">
    <graphics z="0.0" y="-74.49527020764071" x="337.270598171046"/>
  </node>
  <node id="80383" label="0001010100" cy:nodeId="9949">
    <graphics z="0.0" y="-142.62291760754306" x="148.6885316350963"/>
  </node>
  <node id="80382" label="0000010110" cy:nodeId="9950">
    <graphics z="0.0" y="27.99353747058194" x="384.9051644781139"/>
  </node>
  <node id="80381" label="0000010100" cy:nodeId="9951">
    <graphics z="0.0" y="-15.397560551878996" x="303.8769776800182"/>
  </node>
  <node id="80380" label="0011011100" cy:nodeId="9952">
    <graphics z="0.0" y="128.87303881335538" x="226.76791548519395"/>
  </node>
  <node id="80379" label="0011011010" cy:nodeId="9953">
    <graphics z="0.0" y="351.8433604686288" x="224.84531569271348"/>
  </node>
  <node id="80378" label="0001110100" cy:nodeId="9954">
    <graphics z="0.0" y="8.377509638550691" x="290.92119383602403"/>
  </node>
  <node id="80377" label="0101100010" cy:nodeId="9955">
    <graphics z="0.0" y="-220.92536206555087" x="413.83436751156114"/>
  </node>
  <node id="80376" label="1011011100" cy:nodeId="9956">
    <graphics z="0.0" y="241.81229357409757" x="-407.8972075006459"/>
  </node>
  <node id="80375" label="1011011010" cy:nodeId="9957">
    <graphics z="0.0" y="-19.170875981566496" x="-396.73152756900527"/>
  </node>
  <node id="80374" label="1001110100" cy:nodeId="9958">
    <graphics z="0.0" y="35.193519160035066" x="-539.6816236993764"/>
  </node>
  <node id="80373" label="1101100010" cy:nodeId="9959">
    <graphics z="0.0" y="-95.55684323620517" x="-290.39241624088027"/>
  </node>
  <node id="80372" label="0101011100" cy:nodeId="9960">
    <graphics z="0.0" y="-156.0101856739493" x="250.95409559994005"/>
  </node>
  <node id="80371" label="0101011010" cy:nodeId="9961">
    <graphics z="0.0" y="81.71170763659757" x="245.31675123958848"/>
  </node>
  <node id="80370" label="1101011100" cy:nodeId="9962">
    <graphics z="0.0" y="235.11545519519132" x="-460.6529295465443"/>
  </node>
  <node id="80369" label="1101011010" cy:nodeId="9963">
    <graphics z="0.0" y="83.68820910144132" x="-310.41121506900527"/>
  </node>
  <node id="80368" label="0110110100" cy:nodeId="9964">
    <graphics z="0.0" y="-1.1608318836661056" x="594.6934144475963"/>
  </node>
  <node id="80367" label="0001011100" cy:nodeId="9965">
    <graphics z="0.0" y="-25.957688763854094" x="356.04716086178087"/>
  </node>
  <node id="80366" label="0001011010" cy:nodeId="9966">
    <graphics z="0.0" y="300.91797594714444" x="338.37436651973985"/>
  </node>
  <node id="80365" label="1001011100" cy:nodeId="9967">
    <graphics z="0.0" y="367.5623240916757" x="-329.75630784244277"/>
  </node>
  <node id="80364" label="1001011010" cy:nodeId="9968">
    <graphics z="0.0" y="39.79692797351163" x="-536.7537443658803"/>
  </node>
  <node id="80363" label="1110110100" cy:nodeId="9969">
    <graphics z="0.0" y="-133.2839130909415" x="-711.9761984369252"/>
  </node>
  <node id="80362" label="0010110100" cy:nodeId="9970">
    <graphics z="0.0" y="83.24303393054288" x="315.8641564825084"/>
  </node>
  <node id="80361" label="1010110100" cy:nodeId="9971">
    <graphics z="0.0" y="-93.23418469738681" x="-650.6607153436635"/>
  </node>
  <node id="80360" label="0100110100" cy:nodeId="9972">
    <graphics z="0.0" y="-87.21521420788486" x="513.8571107366588"/>
  </node>
  <node id="80359" label="0110011100" cy:nodeId="9973">
    <graphics z="0.0" y="16.328879877808504" x="375.2769334295299"/>
  </node>
  <node id="80358" label="0110011010" cy:nodeId="9974">
    <graphics z="0.0" y="342.96939806628507" x="384.0643441656139"/>
  </node>
  <node id="80357" label="1100110100" cy:nodeId="9975">
    <graphics z="0.0" y="-28.416176274535246" x="-691.4983923456166"/>
  </node>
  <node id="80356" label="1110011100" cy:nodeId="9976">
    <graphics z="0.0" y="-27.394073918578215" x="-646.4786112329457"/>
  </node>
  <node id="80355" label="1110011010" cy:nodeId="9977">
    <graphics z="0.0" y="-260.8995594532462" x="-582.3616316339467"/>
  </node>
  <node id="80354" label="0000110100" cy:nodeId="9978">
    <graphics z="0.0" y="-57.27006001782138" x="262.1619279363658"/>
  </node>
  <node id="80353" label="0010011100" cy:nodeId="9979">
    <graphics z="0.0" y="118.15982775378507" x="438.7947099187877"/>
  </node>
  <node id="80352" label="0010011010" cy:nodeId="9980">
    <graphics z="0.0" y="393.93628649401944" x="365.8868720510509"/>
  </node>
  <node id="80351" label="1010011100" cy:nodeId="9981">
    <graphics z="0.0" y="95.85526232409757" x="-518.3751432916615"/>
  </node>
  <node id="80350" label="1010011010" cy:nodeId="9982">
    <graphics z="0.0" y="-183.2541508228751" x="-443.19209885806777"/>
  </node>
  <node id="80349" label="1000110100" cy:nodeId="9983">
    <graphics z="0.0" y="6.444167658570223" x="-768.7675154230092"/>
  </node>
  <node id="80348" label="0111100100" cy:nodeId="9984">
    <graphics z="0.0" y="-144.79071851086337" x="488.5130860784557"/>
  </node>
  <node id="80347" label="0111000110" cy:nodeId="9985">
    <graphics z="0.0" y="-24.24108929943759" x="144.4406068304088"/>
  </node>
  <node id="80346" label="1111100100" cy:nodeId="9986">
    <graphics z="0.0" y="9.024406000855379" x="-426.87903428287245"/>
  </node>
  <node id="80345" label="1111000110" cy:nodeId="9987">
    <graphics z="0.0" y="38.810584589722566" x="-270.67867112369277"/>
  </node>
  <node id="80344" label="0100011100" cy:nodeId="9988">
    <graphics z="0.0" y="-177.34796948742587" x="592.5248506048229"/>
  </node>
  <node id="80343" label="0100011010" cy:nodeId="9989">
    <graphics z="0.0" y="111.9892802684335" x="519.755120990565"/>
  </node>
  <node id="80342" label="0011100100" cy:nodeId="9990">
    <graphics z="0.0" y="53.88255266833585" x="594.6331574895885"/>
  </node>
  <node id="80341" label="0011000110" cy:nodeId="9991">
    <graphics z="0.0" y="-92.29216046642978" x="173.5107972600963"/>
  </node>
  <node id="80340" label="1011100100" cy:nodeId="9992">
    <graphics z="0.0" y="-48.48140378308017" x="-307.0128386041615"/>
  </node>
  <node id="80339" label="1011000110" cy:nodeId="9993">
    <graphics z="0.0" y="-166.12828107189853" x="-148.58101487369277"/>
  </node>
  <node id="80338" label="1100011100" cy:nodeId="9994">
    <graphics z="0.0" y="166.96924547839444" x="-738.4778654596303"/>
  </node>
  <node id="80337" label="1100011010" cy:nodeId="9995">
    <graphics z="0.0" y="142.53031115222257" x="-403.07532334537245"/>
  </node>
  <node id="80336" label="1011101000" cy:nodeId="9996">
    <graphics z="0.0" y="-175.22858472180087" x="-260.148214580724"/>
  </node>
  <node id="80335" label="0011101000" cy:nodeId="9997">
    <graphics z="0.0" y="167.9310985057382" x="591.6580750921275"/>
  </node>
  <node id="80334" label="0000011100" cy:nodeId="9998">
    <graphics z="0.0" y="80.57018999743741" x="580.8025605657604"/>
  </node>
  <node id="80333" label="0000011010" cy:nodeId="9999">
    <graphics z="0.0" y="277.5158153026132" x="593.7833039739635"/>
  </node>
  <node id="80332" label="1000011100" cy:nodeId="10000">
    <graphics z="0.0" y="232.42777208972257" x="-493.3569700738881"/>
  </node>
  <node id="80331" label="1000011010" cy:nodeId="10001">
    <graphics z="0.0" y="163.48215441394132" x="-497.3009398004506"/>
  </node>
  <node id="80330" label="0111000100" cy:nodeId="10002">
    <graphics z="0.0" y="-167.29511304211337" x="378.46845984249376"/>
  </node>
  <node id="80329" label="0101100100" cy:nodeId="10003">
    <graphics z="0.0" y="-307.2391895801993" x="458.83232283382677"/>
  </node>
  <node id="80328" label="0101000110" cy:nodeId="10004">
    <graphics z="0.0" y="-263.8705830128165" x="212.02953505306505"/>
  </node>
  <node id="80327" label="1111000100" cy:nodeId="10005">
    <graphics z="0.0" y="137.42655138659757" x="-259.837911846349"/>
  </node>
  <node id="80326" label="1101100100" cy:nodeId="10006">
    <graphics z="0.0" y="172.32340197253507" x="-461.3924009820912"/>
  </node>
  <node id="80325" label="1101000110" cy:nodeId="10007">
    <graphics z="0.0" y="85.33870653796475" x="-194.34123826236464"/>
  </node>
  <node id="80324" label="0011000100" cy:nodeId="10008">
    <graphics z="0.0" y="-142.22301526379306" x="297.15123915462755"/>
  </node>
  <node id="80323" label="0001100100" cy:nodeId="10009">
    <graphics z="0.0" y="-215.42086072277743" x="522.7695863225963"/>
  </node>
  <node id="80322" label="0001000110" cy:nodeId="10010">
    <graphics z="0.0" y="-169.40369458508212" x="237.7318437078502"/>
  </node>
  <node id="80321" label="1011000100" cy:nodeId="10011">
    <graphics z="0.0" y="31.01379351306241" x="-174.07915330142714"/>
  </node>
  <node id="80320" label="1001100100" cy:nodeId="10012">
    <graphics z="0.0" y="145.6685252635507" x="-303.75542283267714"/>
  </node>
  <node id="80319" label="1001000110" cy:nodeId="10013">
    <graphics z="0.0" y="93.06952624011319" x="-44.17168259830214"/>
  </node>
  <node id="80318" label="0110101000" cy:nodeId="10014">
    <graphics z="0.0" y="81.19600634265225" x="734.3324372747447"/>
  </node>
  <node id="80317" label="1110101000" cy:nodeId="10015">
    <graphics z="0.0" y="-59.90860219311435" x="-613.6027090570424"/>
  </node>
  <node id="80316" label="0111111000" cy:nodeId="10016">
    <graphics z="0.0" y="134.95572619128507" x="385.0780808904674"/>
  </node>
  <node id="80315" label="1111111000" cy:nodeId="10017">
    <graphics z="0.0" y="7.351096674683504" x="-675.9546740076039"/>
  </node>
  <node id="80314" label="0110100100" cy:nodeId="10018">
    <graphics z="0.0" y="-0.3395466358633712" x="555.26659559994"/>
  </node>
  <node id="80313" label="0110000110" cy:nodeId="10019">
    <graphics z="0.0" y="15.830180689576082" x="360.08505892544053"/>
  </node>
  <node id="80312" label="0011111000" cy:nodeId="10020">
    <graphics z="0.0" y="164.6305613963632" x="365.57933497219346"/>
  </node>
  <node id="80311" label="1110100100" cy:nodeId="10021">
    <graphics z="0.0" y="-54.120559170958586" x="-644.880413295934"/>
  </node>
  <node id="80310" label="1110000110" cy:nodeId="10022">
    <graphics z="0.0" y="-180.34813733410556" x="-353.9144194147084"/>
  </node>
  <node id="80309" label="1011111000" cy:nodeId="10023">
    <graphics z="0.0" y="-3.277687505003996" x="-647.7490828058217"/>
  </node>
  <node id="80308" label="0100101000" cy:nodeId="10024">
    <graphics z="0.0" y="-15.828719571349211" x="749.9209382513072"/>
  </node>
  <node id="80307" label="0010100100" cy:nodeId="10025">
    <graphics z="0.0" y="170.67176012683194" x="532.2833650091197"/>
  </node>
  <node id="80306" label="0010000110" cy:nodeId="10026">
    <graphics z="0.0" y="-101.3654560596915" x="216.37661146908067"/>
  </node>
  <node id="80305" label="1010100100" cy:nodeId="10027">
    <graphics z="0.0" y="35.10278277087491" x="-487.1740629693959"/>
  </node>
  <node id="80304" label="1010000110" cy:nodeId="10028">
    <graphics z="0.0" y="-203.632667973754" x="-335.3990690729115"/>
  </node>
  <node id="80303" label="1100101000" cy:nodeId="10029">
    <graphics z="0.0" y="149.54868273425382" x="-581.9944746515248"/>
  </node>
  <node id="80302" label="1010101000" cy:nodeId="10030">
    <graphics z="0.0" y="-66.75436826061923" x="-424.9747679254506"/>
  </node>
  <node id="80301" label="1001101000" cy:nodeId="10031">
    <graphics z="0.0" y="229.96973375964444" x="-234.07097459048964"/>
  </node>
  <node id="80300" label="1000101000" cy:nodeId="10032">
    <graphics z="0.0" y="147.6299052684335" x="-419.1052000543568"/>
  </node>
  <node id="80299" label="0010101000" cy:nodeId="10033">
    <graphics z="0.0" y="153.82639269519132" x="762.4727876165416"/>
  </node>
  <node id="80298" label="0001101000" cy:nodeId="10034">
    <graphics z="0.0" y="66.43106798816007" x="544.5232331731822"/>
  </node>
  <node id="80297" label="0000101000" cy:nodeId="10035">
    <graphics z="0.0" y="33.19359545398038" x="749.0785310247447"/>
  </node>
  <node id="80296" label="0101111000" cy:nodeId="10036">
    <graphics z="0.0" y="-5.371166661498137" x="584.7566773870494"/>
  </node>
  <node id="80295" label="1101111000" cy:nodeId="10037">
    <graphics z="0.0" y="203.26233629870694" x="-544.0600950738881"/>
  </node>
  <node id="80294" label="0111101000" cy:nodeId="10038">
    <graphics z="0.0" y="119.78377489733975" x="781.3435761907604"/>
  </node>
  <node id="80293" label="0111001010" cy:nodeId="10039">
    <graphics z="0.0" y="257.7044139354257" x="340.9681355932262"/>
  </node>
  <node id="80292" label="0111001000" cy:nodeId="10040">
    <graphics z="0.0" y="78.60378985095304" x="504.2076051214244"/>
  </node>
  <node id="80291" label="0110000100" cy:nodeId="10041">
    <graphics z="0.0" y="-8.750999882933684" x="502.8719117620494"/>
  </node>
  <node id="80290" label="0101000100" cy:nodeId="10042">
    <graphics z="0.0" y="-375.45186658215243" x="305.1559693792369"/>
  </node>
  <node id="80289" label="0100100100" cy:nodeId="10043">
    <graphics z="0.0" y="-199.74356885266025" x="590.6598756292369"/>
  </node>
  <node id="80288" label="0100000110" cy:nodeId="10044">
    <graphics z="0.0" y="-280.0677570850821" x="402.05911040096544"/>
  </node>
  <node id="80287" label="0100000100" cy:nodeId="10045">
    <graphics z="0.0" y="-305.8125233204337" x="476.98710036068223"/>
  </node>
  <node id="80286" label="0001111000" cy:nodeId="10046">
    <graphics z="0.0" y="231.63407091784757" x="357.598292110255"/>
  </node>
  <node id="80285" label="1111101000" cy:nodeId="10047">
    <graphics z="0.0" y="-37.61355252575595" x="-317.60091233463027"/>
  </node>
  <node id="80284" label="1111001010" cy:nodeId="10048">
    <graphics z="0.0" y="-163.98617596935946" x="-261.99373460025527"/>
  </node>
  <node id="80283" label="1110000100" cy:nodeId="10049">
    <graphics z="0.0" y="70.77422289538663" x="-352.4396879693959"/>
  </node>
  <node id="80282" label="1101000100" cy:nodeId="10050">
    <graphics z="0.0" y="268.87573961901944" x="-257.93535447330214"/>
  </node>
  <node id="80281" label="1100100100" cy:nodeId="10051">
    <graphics z="0.0" y="105.26905016589444" x="-644.2384951135609"/>
  </node>
  <node id="80280" label="1100000110" cy:nodeId="10052">
    <graphics z="0.0" y="-16.30805249523837" x="-329.1417448541615"/>
  </node>
  <node id="80279" label="1001111000" cy:nodeId="10053">
    <graphics z="0.0" y="209.59116320300382" x="-400.61870408267714"/>
  </node>
  <node id="80278" label="0011001010" cy:nodeId="10054">
    <graphics z="0.0" y="336.26843981433194" x="369.2410047033336"/>
  </node>
  <node id="80277" label="0011001000" cy:nodeId="10055">
    <graphics z="0.0" y="210.5239482371835" x="379.55636191158555"/>
  </node>
  <node id="80276" label="0010000100" cy:nodeId="10056">
    <graphics z="0.0" y="-213.31647534680087" x="349.905758617213"/>
  </node>
  <node id="80275" label="0001000100" cy:nodeId="10057">
    <graphics z="0.0" y="-298.27828259777743" x="341.36770987301134"/>
  </node>
  <node id="80274" label="0000100100" cy:nodeId="10058">
    <graphics z="0.0" y="-37.384257748839445" x="588.1808564641979"/>
  </node>
  <node id="80273" label="0000000110" cy:nodeId="10059">
    <graphics z="0.0" y="-166.81935925793368" x="400.8269898870494"/>
  </node>
  <node id="80272" label="0000000100" cy:nodeId="10060">
    <graphics z="0.0" y="-271.292824223754" x="579.8581941106822"/>
  </node>
  <node id="80271" label="1111001000" cy:nodeId="10061">
    <graphics z="0.0" y="112.031394526246" x="-288.748312236974"/>
  </node>
  <node id="80270" label="1011001010" cy:nodeId="10062">
    <graphics z="0.0" y="-130.02955670666415" x="-232.56111741275527"/>
  </node>
  <node id="80269" label="1011001000" cy:nodeId="10063">
    <graphics z="0.0" y="70.07213549304288" x="-172.1823637506459"/>
  </node>
  <node id="80268" label="1100000100" cy:nodeId="10064">
    <graphics z="0.0" y="130.33975939441007" x="-437.09624314517714"/>
  </node>
  <node id="80267" label="1010000100" cy:nodeId="10065">
    <graphics z="0.0" y="-116.46061368298251" x="-139.30486130923964"/>
  </node>
  <node id="80266" label="1001000100" cy:nodeId="10066">
    <graphics z="0.0" y="174.23274950671475" x="-198.77400803775527"/>
  </node>
  <node id="80265" label="1000100100" cy:nodeId="10067">
    <graphics z="0.0" y="192.32309679675382" x="-520.228780986974"/>
  </node>
  <node id="80264" label="1000000110" cy:nodeId="10068">
    <graphics z="0.0" y="-20.359562352416106" x="-314.48345017642714"/>
  </node>
  <node id="80263" label="1000000100" cy:nodeId="10069">
    <graphics z="0.0" y="123.46326403308194" x="-323.68071580142714"/>
  </node>
  <node id="80262" label="0101101000" cy:nodeId="10070">
    <graphics z="0.0" y="-1.7190384418936446" x="576.8468415716197"/>
  </node>
  <node id="80261" label="0101001010" cy:nodeId="10071">
    <graphics z="0.0" y="43.856971308472566" x="270.581163165858"/>
  </node>
  <node id="80260" label="0110111000" cy:nodeId="10072">
    <graphics z="0.0" y="217.75589708972257" x="589.8735902288463"/>
  </node>
  <node id="80259" label="1101101000" cy:nodeId="10073">
    <graphics z="0.0" y="310.68729357409757" x="-477.7260496637318"/>
  </node>
  <node id="80258" label="1101001010" cy:nodeId="10074">
    <graphics z="0.0" y="27.753928705933504" x="-330.316183330724"/>
  </node>
  <node id="80257" label="1110111000" cy:nodeId="10075">
    <graphics z="0.0" y="-25.90637250256259" x="-788.8288023492787"/>
  </node>
  <node id="80256" label="0001001010" cy:nodeId="10076">
    <graphics z="0.0" y="238.83310656237882" x="531.8506410100963"/>
  </node>
  <node id="80255" label="0010111000" cy:nodeId="10077">
    <graphics z="0.0" y="339.91519884753507" x="593.6836335638072"/>
  </node>
  <node id="80254" label="1001001010" cy:nodeId="10078">
    <graphics z="0.0" y="155.64812426257413" x="-421.43225693912245"/>
  </node>
  <node id="80253" label="1010111000" cy:nodeId="10079">
    <graphics z="0.0" y="-73.23550124478061" x="-698.51172471256"/>
  </node>
  <node id="80252" label="0100111000" cy:nodeId="10080">
    <graphics z="0.0" y="166.82332567858975" x="715.2928864934947"/>
  </node>
  <node id="80251" label="1100111000" cy:nodeId="10081">
    <graphics z="0.0" y="180.72196154284757" x="-767.7630217096303"/>
  </node>
  <node id="80250" label="0110001010" cy:nodeId="10082">
    <graphics z="0.0" y="292.93143419909757" x="487.51749586849473"/>
  </node>
  <node id="80249" label="0110001000" cy:nodeId="10083">
    <graphics z="0.0" y="52.24732165026944" x="650.7181794622447"/>
  </node>
  <node id="80248" label="0000111000" cy:nodeId="10084">
    <graphics z="0.0" y="124.66275744128507" x="609.3000886419322"/>
  </node>
  <node id="80247" label="1110001010" cy:nodeId="10085">
    <graphics z="0.0" y="-225.81212659191806" x="-392.84883713931777"/>
  </node>
  <node id="80246" label="1000111000" cy:nodeId="10086">
    <graphics z="0.0" y="206.87107042956632" x="-599.2741873285268"/>
  </node>
  <node id="80245" label="0010001010" cy:nodeId="10087">
    <graphics z="0.0" y="205.97244982409757" x="540.1526734807994"/>
  </node>
  <node id="80244" label="0010001000" cy:nodeId="10088">
    <graphics z="0.0" y="227.07617907214444" x="553.4160249212291"/>
  </node>
  <node id="80243" label="1110001000" cy:nodeId="10089">
    <graphics z="0.0" y="48.95343737292569" x="-522.1333982965443"/>
  </node>
  <node id="80242" label="1010001010" cy:nodeId="10090">
    <graphics z="0.0" y="-237.33007092785556" x="-309.2165434381459"/>
  </node>
  <node id="80241" label="1010001000" cy:nodeId="10091">
    <graphics z="0.0" y="-46.777157262084074" x="-337.89421677798964"/>
  </node>
  <node id="80240" label="1111011000" cy:nodeId="10092">
    <graphics z="0.0" y="67.47115282702725" x="-387.8072416803334"/>
  </node>
  <node id="80239" label="1111010010" cy:nodeId="10093">
    <graphics z="0.0" y="-259.6489033253165" x="-292.40032029361464"/>
  </node>
  <node id="80238" label="1111010000" cy:nodeId="10094">
    <graphics z="0.0" y="17.473891779663973" x="-313.8424284479115"/>
  </node>
  <node id="80237" label="0111011000" cy:nodeId="10095">
    <graphics z="0.0" y="82.18022875476163" x="406.6466920354869"/>
  </node>
  <node id="80236" label="0111010010" cy:nodeId="10096">
    <graphics z="0.0" y="143.71965746569913" x="91.03455519466661"/>
  </node>
  <node id="80235" label="0111010000" cy:nodeId="10097">
    <graphics z="0.0" y="-35.84976048779208" x="265.2674195745494"/>
  </node>
  <node id="80234" label="0011011000" cy:nodeId="10098">
    <graphics z="0.0" y="278.59607653308194" x="287.42127012996934"/>
  </node>
  <node id="80233" label="0011010010" cy:nodeId="10099">
    <graphics z="0.0" y="246.58899645495694" x="143.44501662044786"/>
  </node>
  <node id="80232" label="0011010000" cy:nodeId="10100">
    <graphics z="0.0" y="141.57163195300382" x="172.05324721126817"/>
  </node>
  <node id="80231" label="1011011000" cy:nodeId="10101">
    <graphics z="0.0" y="-35.04407925915439" x="-279.79878831119277"/>
  </node>
  <node id="80230" label="1011010010" cy:nodeId="10102">
    <graphics z="0.0" y="-368.6691212208243" x="-200.33440232486464"/>
  </node>
  <node id="80229" label="1011010000" cy:nodeId="10103">
    <graphics z="0.0" y="-104.19055981945712" x="-83.85845017642714"/>
  </node>
  <node id="80228" label="0101001000" cy:nodeId="10104">
    <graphics z="0.0" y="-140.39793439221103" x="565.2828614690807"/>
  </node>
  <node id="80227" label="0100001010" cy:nodeId="10105">
    <graphics z="0.0" y="55.082374140503816" x="520.0892121770885"/>
  </node>
  <node id="80226" label="0100001000" cy:nodeId="10106">
    <graphics z="0.0" y="-107.63982434582431" x="656.5332124212291"/>
  </node>
  <node id="80225" label="1101001000" cy:nodeId="10107">
    <graphics z="0.0" y="189.38561205554288" x="-194.02522874088027"/>
  </node>
  <node id="80224" label="1100001010" cy:nodeId="10108">
    <graphics z="0.0" y="18.42108111071866" x="-364.5021879693959"/>
  </node>
  <node id="80223" label="0001001000" cy:nodeId="10109">
    <graphics z="0.0" y="57.524985834839754" x="479.01676344661973"/>
  </node>
  <node id="80222" label="0000001010" cy:nodeId="10110">
    <graphics z="0.0" y="138.13541369128507" x="525.7752320745494"/>
  </node>
  <node id="80221" label="0000001000" cy:nodeId="10111">
    <graphics z="0.0" y="152.8034129588632" x="677.1517121770885"/>
  </node>
  <node id="80220" label="1100001000" cy:nodeId="10112">
    <graphics z="0.0" y="187.9162059276132" x="-300.06197190494277"/>
  </node>
  <node id="80219" label="1001001000" cy:nodeId="10113">
    <graphics z="0.0" y="182.3845897166757" x="-133.93205857486464"/>
  </node>
  <node id="80218" label="1000001010" cy:nodeId="10114">
    <graphics z="0.0" y="126.30954699206632" x="-175.64009690494277"/>
  </node>
  <node id="80217" label="1000001000" cy:nodeId="10115">
    <graphics z="0.0" y="54.0019984691171" x="-176.78151536197402"/>
  </node>
  <node id="80216" label="0101011000" cy:nodeId="10116">
    <graphics z="0.0" y="-8.73582692455966" x="449.530252216151"/>
  </node>
  <node id="80215" label="0101010010" cy:nodeId="10117">
    <graphics z="0.0" y="-5.41563649487216" x="140.20224928646348"/>
  </node>
  <node id="80214" label="1101011000" cy:nodeId="10118">
    <graphics z="0.0" y="301.82608751941007" x="-405.65263962955214"/>
  </node>
  <node id="80213" label="1101010010" cy:nodeId="10119">
    <graphics z="0.0" y="-158.6609425098868" x="-238.1723539850209"/>
  </node>
  <node id="80212" label="0001011000" cy:nodeId="10120">
    <graphics z="0.0" y="170.2168651073007" x="474.995225665858"/>
  </node>
  <node id="80211" label="0001010010" cy:nodeId="10121">
    <graphics z="0.0" y="170.7246318309335" x="310.7663018682506"/>
  </node>
  <node id="80210" label="1001011000" cy:nodeId="10122">
    <graphics z="0.0" y="224.91297106433194" x="-303.94942307681777"/>
  </node>
  <node id="80209" label="1001010010" cy:nodeId="10123">
    <graphics z="0.0" y="-74.87553925823886" x="-238.23048997134902"/>
  </node>
  <node id="80208" label="0110011000" cy:nodeId="10124">
    <graphics z="0.0" y="56.246429011109285" x="406.2319352605846"/>
  </node>
  <node id="80207" label="0110010010" cy:nodeId="10125">
    <graphics z="0.0" y="192.838035151246" x="196.85708021908067"/>
  </node>
  <node id="80206" label="0110010000" cy:nodeId="10126">
    <graphics z="0.0" y="0.7339625804452226" x="259.4421250799205"/>
  </node>
  <node id="80205" label="0111110000" cy:nodeId="10127">
    <graphics z="0.0" y="145.34538988757413" x="278.75753950863145"/>
  </node>
  <node id="80204" label="1110011000" cy:nodeId="10128">
    <graphics z="0.0" y="74.57605700183194" x="-570.1713163873646"/>
  </node>
  <node id="80203" label="1110010010" cy:nodeId="10129">
    <graphics z="0.0" y="-362.3163075001212" x="-490.38420701236464"/>
  </node>
  <node id="80202" label="1110010000" cy:nodeId="10130">
    <graphics z="0.0" y="-142.872658208129" x="-537.9101011774037"/>
  </node>
  <node id="80201" label="1111110000" cy:nodeId="10131">
    <graphics z="0.0" y="-163.69757886242587" x="-488.09905076236464"/>
  </node>
  <node id="80200" label="0010011000" cy:nodeId="10132">
    <graphics z="0.0" y="250.9110789744882" x="437.3997132757213"/>
  </node>
  <node id="80199" label="0010010010" cy:nodeId="10133">
    <graphics z="0.0" y="235.97534899401944" x="342.2913920858409"/>
  </node>
  <node id="80198" label="0010010000" cy:nodeId="10134">
    <graphics z="0.0" y="-5.891645863768645" x="392.8123109319713"/>
  </node>
  <node id="80197" label="0011110000" cy:nodeId="10135">
    <graphics z="0.0" y="98.73717455554288" x="296.47108626156114"/>
  </node>
  <node id="80196" label="1010011000" cy:nodeId="10136">
    <graphics z="0.0" y="-10.161888554808684" x="-470.8952085992787"/>
  </node>
  <node id="80195" label="1010010010" cy:nodeId="10137">
    <graphics z="0.0" y="-323.49059338879306" x="-329.9239408990834"/>
  </node>
  <node id="80194" label="1010010000" cy:nodeId="10138">
    <graphics z="0.0" y="-183.3490757496329" x="-324.3005278131459"/>
  </node>
  <node id="80193" label="1011110000" cy:nodeId="10139">
    <graphics z="0.0" y="-169.25061841320712" x="-356.7618620416615"/>
  </node>
  <node id="80192" label="0101010000" cy:nodeId="10140">
    <graphics z="0.0" y="-90.74273724865634" x="332.6383378484752"/>
  </node>
  <node id="80191" label="0100011000" cy:nodeId="10141">
    <graphics z="0.0" y="-48.1986908466788" x="512.0650269964244"/>
  </node>
  <node id="80190" label="0100010010" cy:nodeId="10142">
    <graphics z="0.0" y="-52.35981602978427" x="361.42911219387315"/>
  </node>
  <node id="80189" label="0100010000" cy:nodeId="10143">
    <graphics z="0.0" y="-34.15151639294345" x="333.0188729742076"/>
  </node>
  <node id="80188" label="0101110000" cy:nodeId="10144">
    <graphics z="0.0" y="-68.88632245373446" x="423.8162400701549"/>
  </node>
  <node id="80187" label="1101010000" cy:nodeId="10145">
    <graphics z="0.0" y="90.45416979480069" x="-228.45284104556777"/>
  </node>
  <node id="80186" label="1100011000" cy:nodeId="10146">
    <graphics z="0.0" y="271.4693065135507" x="-494.68652940005995"/>
  </node>
  <node id="80185" label="1100010010" cy:nodeId="10147">
    <graphics z="0.0" y="-46.095964864012785" x="-463.1000120660756"/>
  </node>
  <node id="80184" label="1100010000" cy:nodeId="10148">
    <graphics z="0.0" y="258.96488146472257" x="-356.69100022525527"/>
  </node>
  <node id="80183" label="1101110000" cy:nodeId="10149">
    <graphics z="0.0" y="-123.89659924816806" x="-451.5119535943959"/>
  </node>
  <node id="80182" label="0001010000" cy:nodeId="10150">
    <graphics z="0.0" y="-53.21794553112704" x="220.79812025814317"/>
  </node>
  <node id="80181" label="0000011000" cy:nodeId="10151">
    <graphics z="0.0" y="178.52324633288663" x="579.4842164495494"/>
  </node>
  <node id="80180" label="0000010010" cy:nodeId="10152">
    <graphics z="0.0" y="35.74609331774991" x="458.0132386663463"/>
  </node>
  <node id="80179" label="0000010000" cy:nodeId="10153">
    <graphics z="0.0" y="-57.79074521374423" x="541.7050874212291"/>
  </node>
  <node id="80178" label="0011100000" cy:nodeId="10154">
    <graphics z="0.0" y="-37.66660542797763" x="561.0250031927135"/>
  </node>
  <node id="80177" label="0001110000" cy:nodeId="10155">
    <graphics z="0.0" y="16.834998652222566" x="412.72883009701036"/>
  </node>
  <node id="80176" label="1001010000" cy:nodeId="10156">
    <graphics z="0.0" y="15.815398737671785" x="-126.63109421939589"/>
  </node>
  <node id="80175" label="1000011000" cy:nodeId="10157">
    <graphics z="0.0" y="153.29721789050382" x="-478.1054136774037"/>
  </node>
  <node id="80174" label="1000010010" cy:nodeId="10158">
    <graphics z="0.0" y="-152.14308972668368" x="-424.2114012262318"/>
  </node>
  <node id="80173" label="1000010000" cy:nodeId="10159">
    <graphics z="0.0" y="22.31384234118741" x="-447.29341721744277"/>
  </node>
  <node id="80172" label="1011100000" cy:nodeId="10160">
    <graphics z="0.0" y="-103.11467786144931" x="-223.5838530084584"/>
  </node>
  <node id="80171" label="1001110000" cy:nodeId="10161">
    <graphics z="0.0" y="106.93048815417569" x="-387.1805326959584"/>
  </node>
  <node id="80170" label="0110110000" cy:nodeId="10162">
    <graphics z="0.0" y="255.93262438464444" x="579.5326020696666"/>
  </node>
  <node id="80169" label="0110100000" cy:nodeId="10163">
    <graphics z="0.0" y="30.694366022828035" x="694.6591889837291"/>
  </node>
  <node id="80168" label="1110110000" cy:nodeId="10164">
    <graphics z="0.0" y="-65.54822964977939" x="-662.3948023340199"/>
  </node>
  <node id="80167" label="0010110000" cy:nodeId="10165">
    <graphics z="0.0" y="159.3135447948007" x="599.0149018743541"/>
  </node>
  <node id="80166" label="1110100000" cy:nodeId="10166">
    <graphics z="0.0" y="-214.3604054005118" x="-513.0911161920521"/>
  </node>
  <node id="80165" label="1010110000" cy:nodeId="10167">
    <graphics z="0.0" y="-213.9241261036368" x="-533.9423506280873"/>
  </node>
  <node id="80164" label="0100110000" cy:nodeId="10168">
    <graphics z="0.0" y="181.53795580554288" x="588.5157868841197"/>
  </node>
  <node id="80163" label="0100100000" cy:nodeId="10169">
    <graphics z="0.0" y="-130.16181226086337" x="659.7612702825572"/>
  </node>
  <node id="80162" label="1100110000" cy:nodeId="10170">
    <graphics z="0.0" y="88.65924791980069" x="-612.9202406427357"/>
  </node>
  <node id="80161" label="0010100000" cy:nodeId="10171">
    <graphics z="0.0" y="45.2977748363046" x="654.5135591009166"/>
  </node>
  <node id="80160" label="0001100000" cy:nodeId="10172">
    <graphics z="0.0" y="-74.9996990711661" x="514.5729157903697"/>
  </node>
  <node id="80159" label="0000110000" cy:nodeId="10173">
    <graphics z="0.0" y="90.66828875232022" x="504.7577760198619"/>
  </node>
  <node id="80158" label="0000100000" cy:nodeId="10174">
    <graphics z="0.0" y="-16.06152386975009" x="721.9753510931041"/>
  </node>
  <node id="80157" label="1100100000" cy:nodeId="10175">
    <graphics z="0.0" y="-38.954018071410246" x="-358.07686448306777"/>
  </node>
  <node id="80156" label="1010100000" cy:nodeId="10176">
    <graphics z="0.0" y="-153.71784253430087" x="-489.6796324274037"/>
  </node>
  <node id="80155" label="1001100000" cy:nodeId="10177">
    <graphics z="0.0" y="92.51999621081632" x="-253.7086088678334"/>
  </node>
  <node id="80154" label="1000110000" cy:nodeId="10178">
    <graphics z="0.0" y="-157.81320233654696" x="-586.5586454889271"/>
  </node>
  <node id="80153" label="1000100000" cy:nodeId="10179">
    <graphics z="0.0" y="-21.05652661633212" x="-505.9335386774037"/>
  </node>
  <node id="80152" label="0111100000" cy:nodeId="10180">
    <graphics z="0.0" y="-134.55477948498446" x="373.94378447323106"/>
  </node>
  <node id="80151" label="0111000010" cy:nodeId="10181">
    <graphics z="0.0" y="6.274867579224519" x="254.41011976986192"/>
  </node>
  <node id="80150" label="0111000000" cy:nodeId="10182">
    <graphics z="0.0" y="-55.229937031981535" x="412.7293908575084"/>
  </node>
  <node id="80149" label="1111100000" cy:nodeId="10183">
    <graphics z="0.0" y="-81.222116902587" x="-368.4316313287709"/>
  </node>
  <node id="80148" label="1111000010" cy:nodeId="10184">
    <graphics z="0.0" y="-168.5270771534415" x="-250.16792893619277"/>
  </node>
  <node id="80147" label="0011000010" cy:nodeId="10185">
    <graphics z="0.0" y="58.13023333239835" x="199.8109681585338"/>
  </node>
  <node id="80146" label="0011000000" cy:nodeId="10186">
    <graphics z="0.0" y="88.62649492907804" x="364.90344691067"/>
  </node>
  <node id="80145" label="1111000000" cy:nodeId="10187">
    <graphics z="0.0" y="102.97504381823819" x="-124.90752244205214"/>
  </node>
  <node id="80144" label="1011000010" cy:nodeId="10188">
    <graphics z="0.0" y="-270.0551075489493" x="-124.46105027408339"/>
  </node>
  <node id="80143" label="1011000000" cy:nodeId="10189">
    <graphics z="0.0" y="-45.56012006115634" x="-87.22020554752089"/>
  </node>
  <node id="80142" label="0101100000" cy:nodeId="10190">
    <graphics z="0.0" y="-193.00093884777743" x="486.24682020931505"/>
  </node>
  <node id="80141" label="0101000010" cy:nodeId="10191">
    <graphics z="0.0" y="-122.81670422863681" x="231.21295332699083"/>
  </node>
  <node id="80140" label="1101100000" cy:nodeId="10192">
    <graphics z="0.0" y="103.45380358386319" x="-344.06609177798964"/>
  </node>
  <node id="80139" label="1101000010" cy:nodeId="10193">
    <graphics z="0.0" y="-117.59159131359775" x="-152.38893723697402"/>
  </node>
  <node id="80138" label="1001000010" cy:nodeId="10194">
    <graphics z="0.0" y="-46.38221021008212" x="-140.7267973443959"/>
  </node>
  <node id="80137" label="0001000010" cy:nodeId="10195">
    <graphics z="0.0" y="-143.71380658459384" x="282.64660048275255"/>
  </node>
  <node id="80136" label="0110000010" cy:nodeId="10196">
    <graphics z="0.0" y="32.17164568591397" x="307.1461961248424"/>
  </node>
  <node id="80135" label="0110000000" cy:nodeId="10197">
    <graphics z="0.0" y="-53.67754597973544" x="562.6441895940807"/>
  </node>
  <node id="80134" label="1110000010" cy:nodeId="10198">
    <graphics z="0.0" y="-274.856544926879" x="-372.00054002017714"/>
  </node>
  <node id="80133" label="0010000010" cy:nodeId="10199">
    <graphics z="0.0" y="160.70981554675382" x="313.91796278744005"/>
  </node>
  <node id="80132" label="0010000000" cy:nodeId="10200">
    <graphics z="0.0" y="-65.36183972668368" x="456.2035996892955"/>
  </node>
  <node id="80131" label="1110000000" cy:nodeId="10201">
    <graphics z="0.0" y="35.6871791331796" x="-387.6673796197865"/>
  </node>
  <node id="80130" label="1010000010" cy:nodeId="10202">
    <graphics z="0.0" y="-299.4426807911368" x="-244.97575974673964"/>
  </node>
  <node id="80129" label="1010000000" cy:nodeId="10203">
    <graphics z="0.0" y="-279.0805744678946" x="-297.7564604303334"/>
  </node>
  <node id="80128" label="0101000000" cy:nodeId="10204">
    <graphics z="0.0" y="-233.30214734387118" x="366.34671950130723"/>
  </node>
  <node id="80127" label="0100000010" cy:nodeId="10205">
    <graphics z="0.0" y="-166.49005933117587" x="511.37723707943223"/>
  </node>
  <node id="80126" label="0100000000" cy:nodeId="10206">
    <graphics z="0.0" y="-131.74233289074618" x="534.5418336370494"/>
  </node>
  <node id="80125" label="1101000000" cy:nodeId="10207">
    <graphics z="0.0" y="94.38568834948819" x="-149.15895676822402"/>
  </node>
  <node id="80124" label="1100000010" cy:nodeId="10208">
    <graphics z="0.0" y="-7.56890912365634" x="-288.7197172662709"/>
  </node>
  <node id="80123" label="1100000000" cy:nodeId="10209">
    <graphics z="0.0" y="-43.990658238646574" x="-264.20686936588027"/>
  </node>
  <node id="80122" label="1001000000" cy:nodeId="10210">
    <graphics z="0.0" y="32.516639277222566" x="-98.63316941470839"/>
  </node>
  <node id="80121" label="1000000010" cy:nodeId="10211">
    <graphics z="0.0" y="-162.2804951221915" x="-190.3981840631459"/>
  </node>
  <node id="80120" label="1000000000" cy:nodeId="10212">
    <graphics z="0.0" y="-76.5189337284537" x="-210.22780442447402"/>
  </node>
  <node id="80119" label="0001000000" cy:nodeId="10213">
    <graphics z="0.0" y="-145.78101392101962" x="359.82988142757677"/>
  </node>
  <node id="80118" label="0000000010" cy:nodeId="10214">
    <graphics z="0.0" y="79.79795031237882" x="548.2186372259166"/>
  </node>
  <node id="80117" label="0000000000" cy:nodeId="10215">
    <graphics z="0.0" y="-137.9324955494376" x="603.3658540227916"/>
  </node>
</graph>
