# Supplementary material
Source: publisher figshare collection journal article supplement (https://springernature.figshare.com/ndownloader/files/17562821)
Supplement: Supplementary file 1 [file 17562821 › CytoscapeSession-2018_09_25-21_15/views/14328-47573-STG%2C+Model+1%2C+Fluctuating+Inputs.xgmml]

<?xml version="1.0" encoding="UTF-8" standalone="yes"?>
<graph id="47573" label="STG, Model 1, Fluctuating Inputs" cy:view="1" cy:networkId="14328" cy:visualStyle="Directed" cy:rendererId="org.cytoscape.ding" cy:documentVersion="3.0" xmlns:dc="http://purl.org/dc/elements/1.1/" xmlns:xlink="http://www.w3.org/1999/xlink" xmlns:rdf="http://www.w3.org/1999/02/22-rdf-syntax-ns#" xmlns:cy="http://www.cytoscape.org" xmlns="http://www.cs.rpi.edu/XGMML">
  <graphics>
    <att name="NETWORK_TITLE" value="STG, Model 1, Fluctuating Inputs" type="string" cy:type="String"/>
    <att name="NETWORK_EDGE_SELECTION" value="true" type="string" cy:type="String"/>
    <att name="NETWORK_WIDTH" value="1193.0" type="string" cy:type="String"/>
    <att name="NETWORK_NODE_SELECTION" value="true" type="string" cy:type="String"/>
    <att name="NETWORK_CENTER_Z_LOCATION" value="0.0" type="string" cy:type="String"/>
    <att name="NETWORK_CENTER_X_LOCATION" value="1.5938720703125" type="string" cy:type="String"/>
    <att name="NETWORK_SCALE_FACTOR" value="0.18112994774670402" type="string" cy:type="String"/>
    <att name="NETWORK_DEPTH" value="0.0" type="string" cy:type="String"/>
    <att name="NETWORK_HEIGHT" value="501.0" type="string" cy:type="String"/>
    <att name="NETWORK_CENTER_Y_LOCATION" value="4.799072265625" type="string" cy:type="String"/>
  </graphics>
  <node id="48598" label="0111111111" cy:nodeId="14338">
    <graphics z="0.0" y="-2054.902458815785" x="61.728019706955024"/>
  </node>
  <node id="48597" label="1111111111" cy:nodeId="14339">
    <graphics z="0.0" y="-2140.606560378285" x="-56.86076355720513"/>
  </node>
  <node id="48596" label="1011111111" cy:nodeId="14340">
    <graphics z="0.0" y="-1779.2861258079724" x="-92.69807434822076"/>
  </node>
  <node id="48595" label="0011111111" cy:nodeId="14341">
    <graphics z="0.0" y="-1705.2270437767224" x="-37.39662171150201"/>
  </node>
  <node id="48594" label="1101111111" cy:nodeId="14342">
    <graphics z="0.0" y="-1901.50670686266" x="-563.1302337720489"/>
  </node>
  <node id="48593" label="0101111111" cy:nodeId="14343">
    <graphics z="0.0" y="-1796.31188264391" x="-474.2264251782989"/>
  </node>
  <node id="48592" label="1001111111" cy:nodeId="14344">
    <graphics z="0.0" y="-1483.889275222035" x="-667.3652191236114"/>
  </node>
  <node id="48591" label="0001111111" cy:nodeId="14345">
    <graphics z="0.0" y="-1485.375603347035" x="-554.5508880689239"/>
  </node>
  <node id="48590" label="0110111111" cy:nodeId="14346">
    <graphics z="0.0" y="-1144.29479280016" x="-1045.9410858228302"/>
  </node>
  <node id="48589" label="1110111111" cy:nodeId="14347">
    <graphics z="0.0" y="-1244.98619905016" x="-1172.0726776197052"/>
  </node>
  <node id="48588" label="1010111111" cy:nodeId="14348">
    <graphics z="0.0" y="-747.2076956321911" x="-1251.8712616040802"/>
  </node>
  <node id="48587" label="0010111111" cy:nodeId="14349">
    <graphics z="0.0" y="-643.0931326439098" x="-1161.9331512525177"/>
  </node>
  <node id="48586" label="1100111111" cy:nodeId="14350">
    <graphics z="0.0" y="-882.6617971946911" x="-1580.0428924634552"/>
  </node>
  <node id="48585" label="0100111111" cy:nodeId="14351">
    <graphics z="0.0" y="-749.8846975853161" x="-1514.5310516431427"/>
  </node>
  <node id="48584" label="0000111111" cy:nodeId="14352">
    <graphics z="0.0" y="-299.0383230735973" x="-1562.6943817212677"/>
  </node>
  <node id="48583" label="1000111111" cy:nodeId="14353">
    <graphics z="0.0" y="-358.8092886497692" x="-1692.9092254712677"/>
  </node>
  <node id="48582" label="1111011111" cy:nodeId="14354">
    <graphics z="0.0" y="-2120.078240065785" x="504.2904205248261"/>
  </node>
  <node id="48581" label="0111011111" cy:nodeId="14355">
    <graphics z="0.0" y="-2046.36705842516" x="649.9597320482636"/>
  </node>
  <node id="48580" label="1011011111" cy:nodeId="14356">
    <graphics z="0.0" y="-1858.3723074485974" x="512.1711273119355"/>
  </node>
  <node id="48579" label="0011011111" cy:nodeId="14357">
    <graphics z="0.0" y="-1760.77379670641" x="662.4442901537324"/>
  </node>
  <node id="48578" label="0101011111" cy:nodeId="14358">
    <graphics z="0.0" y="-1823.5607840110974" x="257.5243530199433"/>
  </node>
  <node id="48577" label="1101011111" cy:nodeId="14359">
    <graphics z="0.0" y="-1926.196404128285" x="137.86396788810737"/>
  </node>
  <node id="48576" label="1001011111" cy:nodeId="14360">
    <graphics z="0.0" y="-1569.150505690785" x="-3.625282294998101"/>
  </node>
  <node id="48575" label="0001011111" cy:nodeId="14361">
    <graphics z="0.0" y="-1545.9887625267224" x="80.8695964739228"/>
  </node>
  <node id="48574" label="0111101111" cy:nodeId="14362">
    <graphics z="0.0" y="-1858.797966628285" x="-891.5190277173614"/>
  </node>
  <node id="48573" label="1111101111" cy:nodeId="14363">
    <graphics z="0.0" y="-1941.006462722035" x="-1004.4192352368926"/>
  </node>
  <node id="48572" label="0110011111" cy:nodeId="14364">
    <graphics z="0.0" y="-1171.5720144798474" x="-504.25761414314263"/>
  </node>
  <node id="48571" label="1110011111" cy:nodeId="14365">
    <graphics z="0.0" y="-1281.3015066673474" x="-521.9702606275176"/>
  </node>
  <node id="48570" label="1011101111" cy:nodeId="14366">
    <graphics z="0.0" y="-1562.6164480735974" x="-1054.6599578931427"/>
  </node>
  <node id="48569" label="0011101111" cy:nodeId="14367">
    <graphics z="0.0" y="-1481.473259597035" x="-983.1484832837676"/>
  </node>
  <node id="48568" label="1010011111" cy:nodeId="14368">
    <graphics z="0.0" y="-796.0992971946911" x="-673.1979827954864"/>
  </node>
  <node id="48567" label="0010011111" cy:nodeId="14369">
    <graphics z="0.0" y="-703.3539358665661" x="-556.6544647290801"/>
  </node>
  <node id="48566" label="0101101111" cy:nodeId="14370">
    <graphics z="0.0" y="-1550.234490065785" x="-1308.0107879712677"/>
  </node>
  <node id="48565" label="1101101111" cy:nodeId="14371">
    <graphics z="0.0" y="-1612.44957795641" x="-1443.6704559400177"/>
  </node>
  <node id="48564" label="1100011111" cy:nodeId="14372">
    <graphics z="0.0" y="-973.4901053001598" x="-956.4097137525176"/>
  </node>
  <node id="48563" label="0100011111" cy:nodeId="14373">
    <graphics z="0.0" y="-881.0653616478161" x="-974.6012420728301"/>
  </node>
  <node id="48562" label="0011101110" cy:nodeId="14374">
    <graphics z="0.0" y="-1589.7805105735974" x="-898.7185516431426"/>
  </node>
  <node id="48561" label="0001101111" cy:nodeId="14375">
    <graphics z="0.0" y="-1211.635857253285" x="-1469.7352752759552"/>
  </node>
  <node id="48560" label="1011101110" cy:nodeId="14376">
    <graphics z="0.0" y="-1693.53063264391" x="-1011.2063446118926"/>
  </node>
  <node id="48559" label="1001101111" cy:nodeId="14377">
    <graphics z="0.0" y="-1290.5246511985974" x="-1555.0895233228302"/>
  </node>
  <node id="48558" label="0000011111" cy:nodeId="14378">
    <graphics z="0.0" y="-349.63454499742545" x="-1108.8275604322052"/>
  </node>
  <node id="48557" label="1000011111" cy:nodeId="14379">
    <graphics z="0.0" y="-469.0198294212536" x="-1074.8780975415802"/>
  </node>
  <node id="48556" label="0110101111" cy:nodeId="14380">
    <graphics z="0.0" y="-879.1689993431286" x="-1869.1130828931427"/>
  </node>
  <node id="48555" label="0110101110" cy:nodeId="14381">
    <graphics z="0.0" y="-1046.5146414329724" x="-1726.8606414868927"/>
  </node>
  <node id="48554" label="1110101111" cy:nodeId="14382">
    <graphics z="0.0" y="-994.4140554954723" x="-1924.4553680493927"/>
  </node>
  <node id="48553" label="1110101110" cy:nodeId="14383">
    <graphics z="0.0" y="-1166.2158133079724" x="-1837.8303680493927"/>
  </node>
  <node id="48552" label="1010101111" cy:nodeId="14384">
    <graphics z="0.0" y="-499.0183645775036" x="-1962.8994598462677"/>
  </node>
  <node id="48551" label="0010101111" cy:nodeId="14385">
    <graphics z="0.0" y="-393.3568655540661" x="-1948.9639129712677"/>
  </node>
  <node id="48550" label="0111110111" cy:nodeId="14386">
    <graphics z="0.0" y="-1455.0309988548474" x="448.6874847338105"/>
  </node>
  <node id="48549" label="1111110111" cy:nodeId="14387">
    <graphics z="0.0" y="-1561.7180105735974" x="329.275009147873"/>
  </node>
  <node id="48548" label="1011110111" cy:nodeId="14388">
    <graphics z="0.0" y="-1033.6174246360974" x="392.28764342521674"/>
  </node>
  <node id="48547" label="0011110111" cy:nodeId="14389">
    <graphics z="0.0" y="-893.1196219017223" x="431.57987975334174"/>
  </node>
  <node id="48546" label="0100101111" cy:nodeId="14390">
    <graphics z="0.0" y="-478.0170828392223" x="-2155.8989715650177"/>
  </node>
  <node id="48545" label="0100101110" cy:nodeId="14391">
    <graphics z="0.0" y="-643.8677908470348" x="-2083.9353485181427"/>
  </node>
  <node id="48544" label="1100101111" cy:nodeId="14392">
    <graphics z="0.0" y="-601.2167288353161" x="-2241.4573211743927"/>
  </node>
  <node id="48543" label="1100101110" cy:nodeId="14393">
    <graphics z="0.0" y="-784.6118094017223" x="-2153.3772430493927"/>
  </node>
  <node id="48542" label="1010101110" cy:nodeId="14394">
    <graphics z="0.0" y="-663.0022512962536" x="-1902.6001434400177"/>
  </node>
  <node id="48541" label="1001101110" cy:nodeId="14395">
    <graphics z="0.0" y="-1415.356072097035" x="-1451.5941619947052"/>
  </node>
  <node id="48540" label="1000101111" cy:nodeId="14396">
    <graphics z="0.0" y="-136.52098908922233" x="-2298.9209442212677"/>
  </node>
  <node id="48539" label="1000101110" cy:nodeId="14397">
    <graphics z="0.0" y="-295.41420808336295" x="-2236.0796356275177"/>
  </node>
  <node id="48538" label="0010101110" cy:nodeId="14398">
    <graphics z="0.0" y="-543.6448294212536" x="-1831.9658660962677"/>
  </node>
  <node id="48537" label="0001101110" cy:nodeId="14399">
    <graphics z="0.0" y="-1373.766228347035" x="-1318.6589813306427"/>
  </node>
  <node id="48536" label="0000101111" cy:nodeId="14400">
    <graphics z="0.0" y="1.4418710181995493" x="-2230.0984344556427"/>
  </node>
  <node id="48535" label="0000101110" cy:nodeId="14401">
    <graphics z="0.0" y="-184.6839224388317" x="-2144.8603973462677"/>
  </node>
  <node id="48534" label="0101110111" cy:nodeId="14402">
    <graphics z="0.0" y="-1121.6227957298474" x="-191.15892029548638"/>
  </node>
  <node id="48533" label="1101110111" cy:nodeId="14403">
    <graphics z="0.0" y="-1198.07555451891" x="-231.64262390876763"/>
  </node>
  <node id="48532" label="0111101110" cy:nodeId="14404">
    <graphics z="0.0" y="-2019.04625764391" x="-733.0649261548614"/>
  </node>
  <node id="48531" label="0111001111" cy:nodeId="14405">
    <graphics z="0.0" y="-1959.01500764391" x="-224.63920594001763"/>
  </node>
  <node id="48530" label="1111101110" cy:nodeId="14406">
    <graphics z="0.0" y="-2070.74303498766" x="-863.6115570142364"/>
  </node>
  <node id="48529" label="1111001111" cy:nodeId="14407">
    <graphics z="0.0" y="-2062.809685378285" x="-342.12358094001763"/>
  </node>
  <node id="48528" label="1001110111" cy:nodeId="14408">
    <graphics z="0.0" y="-682.9482962181286" x="-251.29206848884576"/>
  </node>
  <node id="48527" label="0001110111" cy:nodeId="14409">
    <graphics z="0.0" y="-542.1183401634411" x="-172.01261902595513"/>
  </node>
  <node id="48526" label="1011001111" cy:nodeId="14410">
    <graphics z="0.0" y="-1698.3745047142224" x="-389.60307312751763"/>
  </node>
  <node id="48525" label="0011001111" cy:nodeId="14411">
    <graphics z="0.0" y="-1609.4221121360974" x="-293.34407044197076"/>
  </node>
  <node id="48524" label="1110110111" cy:nodeId="14412">
    <graphics z="0.0" y="-356.7563406517223" x="-764.2911224439239"/>
  </node>
  <node id="48523" label="0110110111" cy:nodeId="14413">
    <graphics z="0.0" y="-296.99514070055045" x="-672.7570037915801"/>
  </node>
  <node id="48522" label="1101101110" cy:nodeId="14414">
    <graphics z="0.0" y="-1752.7333914329724" x="-1343.4547576978302"/>
  </node>
  <node id="48521" label="1101001111" cy:nodeId="14415">
    <graphics z="0.0" y="-1736.415154128285" x="-806.1371917798614"/>
  </node>
  <node id="48520" label="0101101110" cy:nodeId="14416">
    <graphics z="0.0" y="-1690.4875418235974" x="-1214.4105682447052"/>
  </node>
  <node id="48519" label="0101001111" cy:nodeId="14417">
    <graphics z="0.0" y="-1670.222771315785" x="-726.0093231275176"/>
  </node>
  <node id="48518" label="1001001111" cy:nodeId="14418">
    <graphics z="0.0" y="-1382.1804129173474" x="-925.0153656079864"/>
  </node>
  <node id="48517" label="0001001111" cy:nodeId="14419">
    <graphics z="0.0" y="-1286.98278108141" x="-893.0288543775176"/>
  </node>
  <node id="48516" label="1010110111" cy:nodeId="14420">
    <graphics z="0.0" y="154.17938932874642" x="-810.8474578931426"/>
  </node>
  <node id="48515" label="0010110111" cy:nodeId="14421">
    <graphics z="0.0" y="239.0853188941761" x="-686.1185760572051"/>
  </node>
  <node id="48514" label="1100110111" cy:nodeId="14422">
    <graphics z="0.0" y="-58.88112702867545" x="-1261.3831024243927"/>
  </node>
  <node id="48513" label="1111111110" cy:nodeId="14423">
    <graphics z="0.0" y="-2247.80797639391" x="24.481357567062446"/>
  </node>
  <node id="48512" label="1111111011" cy:nodeId="14424">
    <graphics z="0.0" y="-1371.857536940785" x="681.2702178881074"/>
  </node>
  <node id="48511" label="0100110111" cy:nodeId="14425">
    <graphics z="0.0" y="19.988463730601893" x="-1204.2421112134552"/>
  </node>
  <node id="48510" label="0111111110" cy:nodeId="14426">
    <graphics z="0.0" y="-2171.72692170641" x="161.5222778246308"/>
  </node>
  <node id="48509" label="0111111011" cy:nodeId="14427">
    <graphics z="0.0" y="-1261.472283034535" x="821.2746734545136"/>
  </node>
  <node id="48508" label="1011111110" cy:nodeId="14428">
    <graphics z="0.0" y="-1886.18151155016" x="-20.25716400886529"/>
  </node>
  <node id="48507" label="1011111011" cy:nodeId="14429">
    <graphics z="0.0" y="-864.1694265892223" x="663.7832183763886"/>
  </node>
  <node id="48506" label="0110001111" cy:nodeId="14430">
    <graphics z="0.0" y="-1006.9251638939098" x="-1359.9121551587677"/>
  </node>
  <node id="48505" label="1110001111" cy:nodeId="14431">
    <graphics z="0.0" y="-1086.9050222923474" x="-1402.9805145337677"/>
  </node>
  <node id="48504" label="0011111110" cy:nodeId="14432">
    <graphics z="0.0" y="-1801.32994905016" x="49.84577178215034"/>
  </node>
  <node id="48503" label="0011111011" cy:nodeId="14433">
    <graphics z="0.0" y="-774.0085379173473" x="749.0300445482636"/>
  </node>
  <node id="48502" label="0000110111" cy:nodeId="14434">
    <graphics z="0.0" y="702.8692086646839" x="-1190.0314178540802"/>
  </node>
  <node id="48501" label="1000110111" cy:nodeId="14435">
    <graphics z="0.0" y="626.5339120338245" x="-1277.7250213697052"/>
  </node>
  <node id="48500" label="1010001111" cy:nodeId="14436">
    <graphics z="0.0" y="-607.0423513939098" x="-1471.3162078931427"/>
  </node>
  <node id="48499" label="0010001111" cy:nodeId="14437">
    <graphics z="0.0" y="-556.8210989525036" x="-1379.0699920728302"/>
  </node>
  <node id="48498" label="0111010111" cy:nodeId="14438">
    <graphics z="0.0" y="-1459.4357840110974" x="1111.4440460131073"/>
  </node>
  <node id="48497" label="1111010111" cy:nodeId="14439">
    <graphics z="0.0" y="-1614.7675711204724" x="1044.7307281420135"/>
  </node>
  <node id="48496" label="1101111110" cy:nodeId="14440">
    <graphics z="0.0" y="-2023.92907014391" x="-507.3410492017364"/>
  </node>
  <node id="48495" label="1101111011" cy:nodeId="14441">
    <graphics z="0.0" y="-1036.5485769798474" x="84.05419062828071"/>
  </node>
  <node id="48494" label="0101111110" cy:nodeId="14442">
    <graphics z="0.0" y="-1898.5742117454724" x="-393.3294525220489"/>
  </node>
  <node id="48493" label="0101111011" cy:nodeId="14443">
    <graphics z="0.0" y="-979.5480886985973" x="174.49519347404487"/>
  </node>
  <node id="48492" label="1011010111" cy:nodeId="14444">
    <graphics z="0.0" y="-1088.6140066673474" x="1080.3057403490448"/>
  </node>
  <node id="48491" label="0011010111" cy:nodeId="14445">
    <graphics z="0.0" y="-968.0958181907848" x="1165.1769561693573"/>
  </node>
  <node id="48490" label="1001111110" cy:nodeId="14446">
    <graphics z="0.0" y="-1603.0060965110974" x="-592.0757904126739"/>
  </node>
  <node id="48489" label="1001111011" cy:nodeId="14447">
    <graphics z="0.0" y="-551.9669119407848" x="108.95687865470893"/>
  </node>
  <node id="48488" label="0001111110" cy:nodeId="14448">
    <graphics z="0.0" y="-1587.519158034535" x="-471.16996765876763"/>
  </node>
  <node id="48487" label="0001111011" cy:nodeId="14449">
    <graphics z="0.0" y="-476.4926077415661" x="165.7583084032441"/>
  </node>
  <node id="48486" label="0100001111" cy:nodeId="14450">
    <graphics z="0.0" y="-630.2877127220348" x="-1711.2278289868927"/>
  </node>
  <node id="48485" label="1100001111" cy:nodeId="14451">
    <graphics z="0.0" y="-737.8347097923473" x="-1775.4624481275177"/>
  </node>
  <node id="48484" label="1000001111" cy:nodeId="14452">
    <graphics z="0.0" y="-231.53310456773795" x="-1916.9574432447052"/>
  </node>
  <node id="48483" label="0000001111" cy:nodeId="14453">
    <graphics z="0.0" y="-111.70549836656608" x="-1873.6663055493927"/>
  </node>
  <node id="48482" label="0101010111" cy:nodeId="14454">
    <graphics z="0.0" y="-1195.93639436266" x="625.8591461107636"/>
  </node>
  <node id="48481" label="1101010111" cy:nodeId="14455">
    <graphics z="0.0" y="-1271.011833815785" x="564.2317657396699"/>
  </node>
  <node id="48480" label="1001010111" cy:nodeId="14456">
    <graphics z="0.0" y="-715.9084402610973" x="521.3447112963105"/>
  </node>
  <node id="48479" label="0001010111" cy:nodeId="14457">
    <graphics z="0.0" y="-621.9287039329723" x="565.4803008959199"/>
  </node>
  <node id="48478" label="0110111110" cy:nodeId="14458">
    <graphics z="0.0" y="-1261.9665457298474" x="-1067.8270721509552"/>
  </node>
  <node id="48477" label="0110111011" cy:nodeId="14459">
    <graphics z="0.0" y="-170.46038117906608" x="-383.90620423103326"/>
  </node>
  <node id="48476" label="1110111110" cy:nodeId="14460">
    <graphics z="0.0" y="-1363.83629670641" x="-1137.4171600415802"/>
  </node>
  <node id="48475" label="1110111011" cy:nodeId="14461">
    <graphics z="0.0" y="-236.3428579857067" x="-488.71806336189263"/>
  </node>
  <node id="48474" label="0010111110" cy:nodeId="14462">
    <graphics z="0.0" y="-770.7148977806286" x="-1047.3564910962677"/>
  </node>
  <node id="48473" label="0010111011" cy:nodeId="14463">
    <graphics z="0.0" y="402.49179777601205" x="-368.3386383130645"/>
  </node>
  <node id="48472" label="1010111110" cy:nodeId="14464">
    <graphics z="0.0" y="-850.8991018821911" x="-1222.3693084790802"/>
  </node>
  <node id="48471" label="1010111011" cy:nodeId="14465">
    <graphics z="0.0" y="251.9348061988636" x="-465.71208191658013"/>
  </node>
  <node id="48470" label="0111110110" cy:nodeId="14466">
    <graphics z="0.0" y="-1589.2770926048474" x="428.84199523185737"/>
  </node>
  <node id="48469" label="0111100111" cy:nodeId="14467">
    <graphics z="0.0" y="-1231.70787873766" x="-591.1381683423614"/>
  </node>
  <node id="48468" label="0110010111" cy:nodeId="14468">
    <graphics z="0.0" y="-348.86562409898795" x="-31.3234024121856"/>
  </node>
  <node id="48467" label="1111110110" cy:nodeId="14469">
    <graphics z="0.0" y="-1695.18492951891" x="367.70686339591987"/>
  </node>
  <node id="48466" label="1111100111" cy:nodeId="14470">
    <graphics z="0.0" y="-1309.6987234642224" x="-678.9012909009551"/>
  </node>
  <node id="48465" label="1110010111" cy:nodeId="14471">
    <graphics z="0.0" y="-498.4575735618786" x="-83.3906860425567"/>
  </node>
  <node id="48464" label="1011110110" cy:nodeId="14472">
    <graphics z="0.0" y="-1102.2824636985974" x="400.97932433341987"/>
  </node>
  <node id="48463" label="1011100111" cy:nodeId="14473">
    <graphics z="0.0" y="-891.6346365501598" x="-675.2541961743926"/>
  </node>
  <node id="48462" label="0100111110" cy:nodeId="14474">
    <graphics z="0.0" y="-895.9351126243786" x="-1453.5308075025177"/>
  </node>
  <node id="48461" label="0100111011" cy:nodeId="14475">
    <graphics z="0.0" y="239.0891717384144" x="-914.0363006665801"/>
  </node>
  <node id="48460" label="1100111110" cy:nodeId="14476">
    <graphics z="0.0" y="-1027.4164969017224" x="-1566.5190887525177"/>
  </node>
  <node id="48459" label="1100111011" cy:nodeId="14477">
    <graphics z="0.0" y="174.36029371717416" x="-1061.8070526197052"/>
  </node>
  <node id="48458" label="1010010111" cy:nodeId="14478">
    <graphics z="0.0" y="133.06860861280404" x="-93.95683289314263"/>
  </node>
  <node id="48457" label="0010010111" cy:nodeId="14479">
    <graphics z="0.0" y="176.84265837171517" x="-16.83980561042779"/>
  </node>
  <node id="48456" label="0011110110" cy:nodeId="14480">
    <graphics z="0.0" y="-971.4664236595348" x="491.60542296623237"/>
  </node>
  <node id="48455" label="0011100111" cy:nodeId="14481">
    <graphics z="0.0" y="-785.0449759056286" x="-555.0732879712676"/>
  </node>
  <node id="48454" label="0000111110" cy:nodeId="14482">
    <graphics z="0.0" y="-425.3410574485973" x="-1475.3152313306427"/>
  </node>
  <node id="48453" label="0000111011" cy:nodeId="14483">
    <graphics z="0.0" y="807.5604928443714" x="-889.2612762525176"/>
  </node>
  <node id="48452" label="1000111110" cy:nodeId="14484">
    <graphics z="0.0" y="-537.4803396751598" x="-1579.4807586743927"/>
  </node>
  <node id="48451" label="1000111011" cy:nodeId="14485">
    <graphics z="0.0" y="710.7624581764027" x="-1029.1252899243927"/>
  </node>
  <node id="48450" label="0111111101" cy:nodeId="14486">
    <graphics z="0.0" y="-1484.56285920641" x="874.8889923021699"/>
  </node>
  <node id="48449" label="1111111101" cy:nodeId="14487">
    <graphics z="0.0" y="-1599.7053152610974" x="795.3136749193574"/>
  </node>
  <node id="48448" label="1111011011" cy:nodeId="14488">
    <graphics z="0.0" y="-1347.273552565785" x="1255.6034698412323"/>
  </node>
  <node id="48447" label="0111011011" cy:nodeId="14489">
    <graphics z="0.0" y="-1236.28405061266" x="1366.9372100756073"/>
  </node>
  <node id="48446" label="0101110110" cy:nodeId="14490">
    <graphics z="0.0" y="-1230.5163504173474" x="-109.02136231208794"/>
  </node>
  <node id="48445" label="0101100111" cy:nodeId="14491">
    <graphics z="0.0" y="-885.4486013939098" x="-1122.8226776197052"/>
  </node>
  <node id="48444" label="1100010111" cy:nodeId="14492">
    <graphics z="0.0" y="-127.60125031969108" x="-625.6672821118926"/>
  </node>
  <node id="48443" label="0100010111" cy:nodeId="14493">
    <graphics z="0.0" y="-24.274834304066076" x="-569.9928436353301"/>
  </node>
  <node id="48442" label="1011111101" cy:nodeId="14494">
    <graphics z="0.0" y="-1035.7075125267224" x="741.2180938646699"/>
  </node>
  <node id="48441" label="1101110110" cy:nodeId="14495">
    <graphics z="0.0" y="-1294.713005690785" x="-201.20860291267388"/>
  </node>
  <node id="48440" label="1101100111" cy:nodeId="14496">
    <graphics z="0.0" y="-978.9642263939098" x="-1212.6719207837677"/>
  </node>
  <node id="48439" label="0011111101" cy:nodeId="14497">
    <graphics z="0.0" y="-938.1678396751598" x="884.5503082201386"/>
  </node>
  <node id="48438" label="1011011011" cy:nodeId="14498">
    <graphics z="0.0" y="-963.1859060814098" x="1287.1114044115448"/>
  </node>
  <node id="48437" label="0011011011" cy:nodeId="14499">
    <graphics z="0.0" y="-858.9074636985973" x="1421.1801299974823"/>
  </node>
  <node id="48436" label="1001110110" cy:nodeId="14500">
    <graphics z="0.0" y="-782.2942434837536" x="-214.30747986579888"/>
  </node>
  <node id="48435" label="1001100111" cy:nodeId="14501">
    <graphics z="0.0" y="-566.6718069603161" x="-1221.1062469556427"/>
  </node>
  <node id="48434" label="0000010111" cy:nodeId="14502">
    <graphics z="0.0" y="600.0289376685902" x="-606.0180511548614"/>
  </node>
  <node id="48433" label="1000010111" cy:nodeId="14503">
    <graphics z="0.0" y="496.32248625257455" x="-614.6475067212676"/>
  </node>
  <node id="48432" label="0001110110" cy:nodeId="14504">
    <graphics z="0.0" y="-717.2695852806286" x="-118.73487854743951"/>
  </node>
  <node id="48431" label="0001100111" cy:nodeId="14505">
    <graphics z="0.0" y="-464.3621756126598" x="-1190.0465545728302"/>
  </node>
  <node id="48430" label="0101111101" cy:nodeId="14506">
    <graphics z="0.0" y="-1175.7617117454724" x="318.82804869865424"/>
  </node>
  <node id="48429" label="1101111101" cy:nodeId="14507">
    <graphics z="0.0" y="-1229.7883230735974" x="234.76870726799018"/>
  </node>
  <node id="48428" label="0101011011" cy:nodeId="14508">
    <graphics z="0.0" y="-1030.481560378285" x="861.0651397631074"/>
  </node>
  <node id="48427" label="1101011011" cy:nodeId="14509">
    <graphics z="0.0" y="-1100.4785086204724" x="831.1462554857636"/>
  </node>
  <node id="48426" label="1001111101" cy:nodeId="14510">
    <graphics z="0.0" y="-751.2435843040661" x="174.0267944261933"/>
  </node>
  <node id="48425" label="0001111101" cy:nodeId="14511">
    <graphics z="0.0" y="-636.2764822532848" x="254.963729850998"/>
  </node>
  <node id="48424" label="1110110110" cy:nodeId="14512">
    <graphics z="0.0" y="-553.8270803978161" x="-752.3955535962676"/>
  </node>
  <node id="48423" label="1110100111" cy:nodeId="14513">
    <graphics z="0.0" y="-218.13369050523795" x="-1672.5775604322052"/>
  </node>
  <node id="48422" label="1001011011" cy:nodeId="14514">
    <graphics z="0.0" y="-654.0537039329723" x="749.6510772631074"/>
  </node>
  <node id="48421" label="0001011011" cy:nodeId="14515">
    <graphics z="0.0" y="-523.8034597923473" x="875.0449981615449"/>
  </node>
  <node id="48420" label="0110110110" cy:nodeId="14516">
    <graphics z="0.0" y="-463.4565969993786" x="-681.7455291822051"/>
  </node>
  <node id="48419" label="0110100111" cy:nodeId="14517">
    <graphics z="0.0" y="-148.46056428453483" x="-1602.4619598462677"/>
  </node>
  <node id="48418" label="1010110110" cy:nodeId="14518">
    <graphics z="0.0" y="65.89320692518197" x="-833.0444183423614"/>
  </node>
  <node id="48417" label="1010100111" cy:nodeId="14519">
    <graphics z="0.0" y="331.8459390113636" x="-1698.5354461743927"/>
  </node>
  <node id="48416" label="0010110110" cy:nodeId="14520">
    <graphics z="0.0" y="129.83356031873666" x="-720.9960174634551"/>
  </node>
  <node id="48415" label="0010100111" cy:nodeId="14521">
    <graphics z="0.0" y="408.6286691139027" x="-1621.2819061353302"/>
  </node>
  <node id="48414" label="0110111101" cy:nodeId="14522">
    <graphics z="0.0" y="-308.5235220482067" x="-220.83445740486138"/>
  </node>
  <node id="48413" label="1110111101" cy:nodeId="14523">
    <graphics z="0.0" y="-356.8357473900036" x="-376.09004212165826"/>
  </node>
  <node id="48412" label="0111111010" cy:nodeId="14524">
    <graphics z="0.0" y="-1403.793572097035" x="823.7942047045136"/>
  </node>
  <node id="48411" label="0111101011" cy:nodeId="14525">
    <graphics z="0.0" y="-1085.61901155016" x="-282.4282379224395"/>
  </node>
  <node id="48410" label="1111111010" cy:nodeId="14526">
    <graphics z="0.0" y="-1474.7419363548474" x="726.5672149584199"/>
  </node>
  <node id="48409" label="1111101011" cy:nodeId="14527">
    <graphics z="0.0" y="-1205.3872000267224" x="-311.35124207283013"/>
  </node>
  <node id="48408" label="0110011011" cy:nodeId="14528">
    <graphics z="0.0" y="-286.2578054954723" x="356.12971495841987"/>
  </node>
  <node id="48407" label="1100110110" cy:nodeId="14529">
    <graphics z="0.0" y="-186.27001252672233" x="-1270.6373748853302"/>
  </node>
  <node id="48406" label="1100100111" cy:nodeId="14530">
    <graphics z="0.0" y="150.92178854444467" x="-2119.8696746900177"/>
  </node>
  <node id="48405" label="1110011011" cy:nodeId="14531">
    <graphics z="0.0" y="-296.8648611595348" x="168.26586150383002"/>
  </node>
  <node id="48404" label="0100110110" cy:nodeId="14532">
    <graphics z="0.0" y="-154.56691804430045" x="-1179.2477264478302"/>
  </node>
  <node id="48403" label="0100100111" cy:nodeId="14533">
    <graphics z="0.0" y="287.9044259498402" x="-2056.7085418775177"/>
  </node>
  <node id="48402" label="1010111101" cy:nodeId="14534">
    <graphics z="0.0" y="158.7717660377308" x="-405.0860443189239"/>
  </node>
  <node id="48401" label="0010111101" cy:nodeId="14535">
    <graphics z="0.0" y="240.06262907484017" x="-322.2230072095489"/>
  </node>
  <node id="48400" label="1011111010" cy:nodeId="14536">
    <graphics z="0.0" y="-950.6606375267223" x="677.0999298021699"/>
  </node>
  <node id="48399" label="1011101011" cy:nodeId="14537">
    <graphics z="0.0" y="-747.1690603782848" x="-341.4015960767364"/>
  </node>
  <node id="48398" label="0011111010" cy:nodeId="14538">
    <graphics z="0.0" y="-885.1286551048473" x="777.5244293138886"/>
  </node>
  <node id="48397" label="0011101011" cy:nodeId="14539">
    <graphics z="0.0" y="-596.0967337181286" x="-293.96611023689263"/>
  </node>
  <node id="48396" label="1010011011" cy:nodeId="14540">
    <graphics z="0.0" y="213.23881468275033" x="110.10803603385932"/>
  </node>
  <node id="48395" label="0010011011" cy:nodeId="14541">
    <graphics z="0.0" y="352.62685331800424" x="202.24894713615424"/>
  </node>
  <node id="48394" label="0000110110" cy:nodeId="14542">
    <graphics z="0.0" y="547.9513925025745" x="-1178.8635711743927"/>
  </node>
  <node id="48393" label="0000100111" cy:nodeId="14543">
    <graphics z="0.0" y="790.7700265357777" x="-1992.5947723462677"/>
  </node>
  <node id="48392" label="1000110110" cy:nodeId="14544">
    <graphics z="0.0" y="499.86423429944955" x="-1243.4611053540802"/>
  </node>
  <node id="48391" label="1000100111" cy:nodeId="14545">
    <graphics z="0.0" y="667.4704659889027" x="-2088.8323211743927"/>
  </node>
  <node id="48390" label="0111100110" cy:nodeId="14546">
    <graphics z="0.0" y="-1384.1237722923474" x="-516.1735687329864"/>
  </node>
  <node id="48389" label="0111000111" cy:nodeId="14547">
    <graphics z="0.0" y="-1379.49889436266" x="108.83850096916206"/>
  </node>
  <node id="48388" label="1111100110" cy:nodeId="14548">
    <graphics z="0.0" y="-1402.1179129173474" x="-619.3284759595489"/>
  </node>
  <node id="48387" label="1111000111" cy:nodeId="14549">
    <graphics z="0.0" y="-1463.1476980735974" x="53.265747062912055"/>
  </node>
  <node id="48386" label="1100111101" cy:nodeId="14550">
    <graphics z="0.0" y="-23.885979323597326" x="-877.3027801587676"/>
  </node>
  <node id="48385" label="0100111101" cy:nodeId="14551">
    <graphics z="0.0" y="5.397246689586268" x="-759.0604705884551"/>
  </node>
  <node id="48384" label="0101111010" cy:nodeId="14552">
    <graphics z="0.0" y="-1066.625603347035" x="254.8058929369355"/>
  </node>
  <node id="48383" label="0101101011" cy:nodeId="14553">
    <graphics z="0.0" y="-768.3395315696911" x="-893.4826507642364"/>
  </node>
  <node id="48382" label="1100011011" cy:nodeId="14554">
    <graphics z="0.0" y="4.428756089000331" x="-245.95051575447076"/>
  </node>
  <node id="48381" label="1101111010" cy:nodeId="14555">
    <graphics z="0.0" y="-1174.48619905016" x="137.69031905387885"/>
  </node>
  <node id="48380" label="1101101011" cy:nodeId="14556">
    <graphics z="0.0" y="-870.1446463157848" x="-882.9752655103301"/>
  </node>
  <node id="48379" label="0100011011" cy:nodeId="14557">
    <graphics z="0.0" y="113.3332665870472" x="-195.52476502204888"/>
  </node>
  <node id="48378" label="0011100110" cy:nodeId="14558">
    <graphics z="0.0" y="-869.4562307884411" x="-468.0439300611114"/>
  </node>
  <node id="48377" label="0011000111" cy:nodeId="14559">
    <graphics z="0.0" y="-824.3835989525036" x="119.74842833732612"/>
  </node>
  <node id="48376" label="0000111101" cy:nodeId="14560">
    <graphics z="0.0" y="562.657813401012" x="-761.7270355298614"/>
  </node>
  <node id="48375" label="1000111101" cy:nodeId="14561">
    <graphics z="0.0" y="497.1119759986683" x="-887.4966888501739"/>
  </node>
  <node id="48374" label="1011100110" cy:nodeId="14562">
    <graphics z="0.0" y="-1005.1227957298473" x="-600.0459442212676"/>
  </node>
  <node id="48373" label="1011000111" cy:nodeId="14563">
    <graphics z="0.0" y="-943.9664236595348" x="70.56658553337104"/>
  </node>
  <node id="48372" label="1011101010" cy:nodeId="14564">
    <graphics z="0.0" y="-862.1243216087536" x="-371.5602874829864"/>
  </node>
  <node id="48371" label="1001111010" cy:nodeId="14565">
    <graphics z="0.0" y="-674.0175100853161" x="134.06190489982612"/>
  </node>
  <node id="48370" label="1001101011" cy:nodeId="14566">
    <graphics z="0.0" y="-439.4313894798473" x="-800.4624481275176"/>
  </node>
  <node id="48369" label="0011101010" cy:nodeId="14567">
    <graphics z="0.0" y="-653.7349173118786" x="-333.99885559822076"/>
  </node>
  <node id="48368" label="0001111010" cy:nodeId="14568">
    <graphics z="0.0" y="-555.5206228782848" x="180.48617552970893"/>
  </node>
  <node id="48367" label="0001101011" cy:nodeId="14569">
    <graphics z="0.0" y="-313.2543875267223" x="-859.9944915845489"/>
  </node>
  <node id="48366" label="1000011011" cy:nodeId="14570">
    <graphics z="0.0" y="654.7722848365589" x="-450.89958191658013"/>
  </node>
  <node id="48365" label="0000011011" cy:nodeId="14571">
    <graphics z="0.0" y="695.0897286842152" x="-221.82005310798638"/>
  </node>
  <node id="48364" label="1111011110" cy:nodeId="14572">
    <graphics z="0.0" y="-2213.243767409535" x="633.5727081224824"/>
  </node>
  <node id="48363" label="1111011101" cy:nodeId="14573">
    <graphics z="0.0" y="-1573.9194265892224" x="1347.3523712084198"/>
  </node>
  <node id="48362" label="0111011110" cy:nodeId="14574">
    <graphics z="0.0" y="-2106.75865998766" x="788.2229766771699"/>
  </node>
  <node id="48361" label="0111011101" cy:nodeId="14575">
    <graphics z="0.0" y="-1445.32067170641" x="1488.7051544115448"/>
  </node>
  <node id="48360" label="0101100110" cy:nodeId="14576">
    <graphics z="0.0" y="-1000.8521658470348" x="-1050.8126678540802"/>
  </node>
  <node id="48359" label="0101000111" cy:nodeId="14577">
    <graphics z="0.0" y="-950.9748465110973" x="-408.85673523689263"/>
  </node>
  <node id="48358" label="1011011110" cy:nodeId="14578">
    <graphics z="0.0" y="-1904.491326003285" x="675.4755401537324"/>
  </node>
  <node id="48357" label="1011011101" cy:nodeId="14579">
    <graphics z="0.0" y="-1126.6396414329724" x="1483.4507598802948"/>
  </node>
  <node id="48356" label="1101100110" cy:nodeId="14580">
    <graphics z="0.0" y="-1084.35924592516" x="-1152.8002166822052"/>
  </node>
  <node id="48355" label="1101000111" cy:nodeId="14581">
    <graphics z="0.0" y="-1038.3657156517224" x="-499.78581238533013"/>
  </node>
  <node id="48354" label="0011011110" cy:nodeId="14582">
    <graphics z="0.0" y="-1830.213982253285" x="784.3379669115449"/>
  </node>
  <node id="48353" label="0011011101" cy:nodeId="14583">
    <graphics z="0.0" y="-974.0831228782848" x="1542.0165557787323"/>
  </node>
  <node id="48352" label="1001100110" cy:nodeId="14584">
    <graphics z="0.0" y="-740.4276663353161" x="-1165.4944305493927"/>
  </node>
  <node id="48351" label="1001000111" cy:nodeId="14585">
    <graphics z="0.0" y="-568.9931570579723" x="-517.8262786939239"/>
  </node>
  <node id="48350" label="0001100110" cy:nodeId="14586">
    <graphics z="0.0" y="-569.5485159446911" x="-1088.9465789868927"/>
  </node>
  <node id="48349" label="0001000111" cy:nodeId="14587">
    <graphics z="0.0" y="-472.1879202415661" x="-447.4135589673614"/>
  </node>
  <node id="48348" label="0110111010" cy:nodeId="14588">
    <graphics z="0.0" y="-273.6342703392223" x="-392.40266419197076"/>
  </node>
  <node id="48347" label="0110101011" cy:nodeId="14589">
    <graphics z="0.0" y="88.72872099378549" x="-1440.9376678540802"/>
  </node>
  <node id="48346" label="0110101010" cy:nodeId="14590">
    <graphics z="0.0" y="-100.72644868394889" x="-1354.5452117993927"/>
  </node>
  <node id="48345" label="1110111010" cy:nodeId="14591">
    <graphics z="0.0" y="-314.6132742454723" x="-479.2684173657989"/>
  </node>
  <node id="48344" label="1110101011" cy:nodeId="14592">
    <graphics z="0.0" y="-38.20546784898795" x="-1501.0959930493927"/>
  </node>
  <node id="48343" label="1101011110" cy:nodeId="14593">
    <graphics z="0.0" y="-2036.90807405016" x="232.36183165763862"/>
  </node>
  <node id="48342" label="1101011101" cy:nodeId="14594">
    <graphics z="0.0" y="-1298.1017996360974" x="968.1699371263886"/>
  </node>
  <node id="48341" label="0101011110" cy:nodeId="14595">
    <graphics z="0.0" y="-1941.07506623766" x="349.2180328295136"/>
  </node>
  <node id="48340" label="0101011101" cy:nodeId="14596">
    <graphics z="0.0" y="-1213.6789480735974" x="1071.977188102951"/>
  </node>
  <node id="48339" label="0010111010" cy:nodeId="14597">
    <graphics z="0.0" y="327.1293099830433" x="-400.58268738533013"/>
  </node>
  <node id="48338" label="0010101011" cy:nodeId="14598">
    <graphics z="0.0" y="594.833838791637" x="-1418.8003387525177"/>
  </node>
  <node id="48337" label="1110101010" cy:nodeId="14599">
    <graphics z="0.0" y="-170.68535676500358" x="-1487.3774871900177"/>
  </node>
  <node id="48336" label="1010111010" cy:nodeId="14600">
    <graphics z="0.0" y="245.9577783057972" x="-555.1932220532989"/>
  </node>
  <node id="48335" label="1010101011" cy:nodeId="14601">
    <graphics z="0.0" y="419.91525969007455" x="-1480.6583709790802"/>
  </node>
  <node id="48334" label="0111110011" cy:nodeId="14602">
    <graphics z="0.0" y="-388.9407583763317" x="1124.1745147631073"/>
  </node>
  <node id="48333" label="1111110011" cy:nodeId="14603">
    <graphics z="0.0" y="-495.3195120384411" x="1065.8520660326385"/>
  </node>
  <node id="48332" label="1001011110" cy:nodeId="14604">
    <graphics z="0.0" y="-1706.561638503285" x="112.05593871330268"/>
  </node>
  <node id="48331" label="1001011101" cy:nodeId="14605">
    <graphics z="0.0" y="-789.3652884056286" x="964.2736358568574"/>
  </node>
  <node id="48330" label="0001011110" cy:nodeId="14606">
    <graphics z="0.0" y="-1571.4772879173474" x="196.6927871630097"/>
  </node>
  <node id="48329" label="0001011101" cy:nodeId="14607">
    <graphics z="0.0" y="-705.5299002220348" x="891.9219512865449"/>
  </node>
  <node id="48328" label="0110100110" cy:nodeId="14608">
    <graphics z="0.0" y="-289.7272268821911" x="-1485.8422088697052"/>
  </node>
  <node id="48327" label="0110000111" cy:nodeId="14609">
    <graphics z="0.0" y="-235.24025788805045" x="-969.0236053540801"/>
  </node>
  <node id="48326" label="0011110011" cy:nodeId="14610">
    <graphics z="0.0" y="182.61201414564096" x="1116.3416290209198"/>
  </node>
  <node id="48325" label="1110100110" cy:nodeId="14611">
    <graphics z="0.0" y="-442.0663992454723" x="-1595.3298797681427"/>
  </node>
  <node id="48324" label="1110000111" cy:nodeId="14612">
    <graphics z="0.0" y="-313.7921072532848" x="-998.0245819165801"/>
  </node>
  <node id="48323" label="1011110011" cy:nodeId="14613">
    <graphics z="0.0" y="82.41200575330697" x="1021.6734161302949"/>
  </node>
  <node id="48322" label="0100111010" cy:nodeId="14614">
    <graphics z="0.0" y="109.70640787580453" x="-896.1603851392364"/>
  </node>
  <node id="48321" label="0100101011" cy:nodeId="14615">
    <graphics z="0.0" y="418.0651315162464" x="-1828.5386200025177"/>
  </node>
  <node id="48320" label="0100101010" cy:nodeId="14616">
    <graphics z="0.0" y="218.15662321546517" x="-1802.2163543775177"/>
  </node>
  <node id="48319" label="1100111010" cy:nodeId="14617">
    <graphics z="0.0" y="55.851821274547206" x="-1112.8332977368927"/>
  </node>
  <node id="48318" label="1100101011" cy:nodeId="14618">
    <graphics z="0.0" y="308.999106735973" x="-1926.7856903150177"/>
  </node>
  <node id="48317" label="1010100110" cy:nodeId="14619">
    <graphics z="0.0" y="212.63066038587533" x="-1665.2290496900177"/>
  </node>
  <node id="48316" label="1010000111" cy:nodeId="14620">
    <graphics z="0.0" y="283.263266892223" x="-1090.3220672681427"/>
  </node>
  <node id="48315" label="0010100110" cy:nodeId="14621">
    <graphics z="0.0" y="287.6009896705433" x="-1581.5151825025177"/>
  </node>
  <node id="48314" label="0010000111" cy:nodeId="14622">
    <graphics z="0.0" y="309.2852853248402" x="-959.3334198072051"/>
  </node>
  <node id="48313" label="1100101010" cy:nodeId="14623">
    <graphics z="0.0" y="169.6890901038929" x="-1889.1516571118927"/>
  </node>
  <node id="48312" label="1010101010" cy:nodeId="14624">
    <graphics z="0.0" y="296.86061796644174" x="-1459.5057830884552"/>
  </node>
  <node id="48311" label="1001101010" cy:nodeId="14625">
    <graphics z="0.0" y="-570.4868094017223" x="-856.3433685376739"/>
  </node>
  <node id="48310" label="1000111010" cy:nodeId="14626">
    <graphics z="0.0" y="571.6194222877308" x="-1042.8031463697052"/>
  </node>
  <node id="48309" label="1000101011" cy:nodeId="14627">
    <graphics z="0.0" y="831.9971383521839" x="-1858.0255584790802"/>
  </node>
  <node id="48308" label="1000101010" cy:nodeId="14628">
    <graphics z="0.0" y="687.6763986060902" x="-1832.5358123853302"/>
  </node>
  <node id="48307" label="0010101010" cy:nodeId="14629">
    <graphics z="0.0" y="419.5745309303089" x="-1377.9867401197052"/>
  </node>
  <node id="48306" label="0001101010" cy:nodeId="14630">
    <graphics z="0.0" y="-467.3037039329723" x="-855.2952117993926"/>
  </node>
  <node id="48305" label="0000111010" cy:nodeId="14631">
    <graphics z="0.0" y="692.8063424537464" x="-914.1951751782989"/>
  </node>
  <node id="48304" label="0000101011" cy:nodeId="14632">
    <graphics z="0.0" y="960.6818307349964" x="-1778.2103729322052"/>
  </node>
  <node id="48303" label="0000101010" cy:nodeId="14633">
    <graphics z="0.0" y="812.9721139381214" x="-1745.8944549634552"/>
  </node>
  <node id="48302" label="0111101101" cy:nodeId="14634">
    <graphics z="0.0" y="-1374.071404128285" x="-137.96626282478326"/>
  </node>
  <node id="48301" label="1111101101" cy:nodeId="14635">
    <graphics z="0.0" y="-1473.2812429954724" x="-212.5537262036895"/>
  </node>
  <node id="48300" label="0110011110" cy:nodeId="14636">
    <graphics z="0.0" y="-1327.87731233141" x="-409.5005035474395"/>
  </node>
  <node id="48299" label="0110011101" cy:nodeId="14637">
    <graphics z="0.0" y="-405.9394461204723" x="412.7539215013886"/>
  </node>
  <node id="48298" label="0101110011" cy:nodeId="14638">
    <graphics z="0.0" y="-69.3755728294567" x="571.9442901537324"/>
  </node>
  <node id="48297" label="1110011110" cy:nodeId="14639">
    <graphics z="0.0" y="-1469.7202078392224" x="-403.3834076001739"/>
  </node>
  <node id="48296" label="1110011101" cy:nodeId="14640">
    <graphics z="0.0" y="-513.5206839134411" x="400.4502105638886"/>
  </node>
  <node id="48295" label="1101110011" cy:nodeId="14641">
    <graphics z="0.0" y="-120.54581513902701" x="500.3817291185761"/>
  </node>
  <node id="48294" label="0011101101" cy:nodeId="14642">
    <graphics z="0.0" y="-809.1634451439098" x="-138.25247193122857"/>
  </node>
  <node id="48293" label="1011101101" cy:nodeId="14643">
    <graphics z="0.0" y="-893.9698416282848" x="-261.37373352790826"/>
  </node>
  <node id="48292" label="1100100110" cy:nodeId="14644">
    <graphics z="0.0" y="-15.928520827503576" x="-2036.4487762525177"/>
  </node>
  <node id="48291" label="1100000111" cy:nodeId="14645">
    <graphics z="0.0" y="53.13290342786752" x="-1545.6177215650177"/>
  </node>
  <node id="48290" label="0001110011" cy:nodeId="14646">
    <graphics z="0.0" y="540.3467172096058" x="615.1128082201386"/>
  </node>
  <node id="48289" label="0100100110" cy:nodeId="14647">
    <graphics z="0.0" y="81.56188520887338" x="-1970.6621551587677"/>
  </node>
  <node id="48288" label="0100000111" cy:nodeId="14648">
    <graphics z="0.0" y="158.01230558851205" x="-1507.2396698072052"/>
  </node>
  <node id="48287" label="1001110011" cy:nodeId="14649">
    <graphics z="0.0" y="471.7376779029652" x="496.6967620775605"/>
  </node>
  <node id="48286" label="1010011110" cy:nodeId="14650">
    <graphics z="0.0" y="-903.3989187767223" x="-549.3597869947051"/>
  </node>
  <node id="48285" label="1010011101" cy:nodeId="14651">
    <graphics z="0.0" y="75.10557875135385" x="347.09819030021674"/>
  </node>
  <node id="48284" label="0111101010" cy:nodeId="14652">
    <graphics z="0.0" y="-1299.8049246360974" x="-312.422500617752"/>
  </node>
  <node id="48283" label="0111001011" cy:nodeId="14653">
    <graphics z="0.0" y="-1219.4941336204724" x="437.18766783927924"/>
  </node>
  <node id="48282" label="0010011110" cy:nodeId="14654">
    <graphics z="0.0" y="-782.5455862571911" x="-447.78813172126763"/>
  </node>
  <node id="48281" label="0010011101" cy:nodeId="14655">
    <graphics z="0.0" y="199.9984963844105" x="419.48078917716987"/>
  </node>
  <node id="48280" label="1111101010" cy:nodeId="14656">
    <graphics z="0.0" y="-1403.020622878285" x="-319.2045745923614"/>
  </node>
  <node id="48279" label="1111001011" cy:nodeId="14657">
    <graphics z="0.0" y="-1351.6423269798474" x="351.1191253588105"/>
  </node>
  <node id="48278" label="1011001011" cy:nodeId="14658">
    <graphics z="0.0" y="-841.4709402610973" x="337.6317291185761"/>
  </node>
  <node id="48277" label="0011001011" cy:nodeId="14659">
    <graphics z="0.0" y="-737.2796560814098" x="462.6036529467011"/>
  </node>
  <node id="48276" label="0000100110" cy:nodeId="14660">
    <graphics z="0.0" y="600.738868088512" x="-1972.2600555493927"/>
  </node>
  <node id="48275" label="0000000111" cy:nodeId="14661">
    <graphics z="0.0" y="817.6196359107777" x="-1540.7482147290802"/>
  </node>
  <node id="48274" label="1000100110" cy:nodeId="14662">
    <graphics z="0.0" y="490.5569528053089" x="-2066.9048309400177"/>
  </node>
  <node id="48273" label="1000000111" cy:nodeId="14663">
    <graphics z="0.0" y="689.3160470435902" x="-1547.4051971509552"/>
  </node>
  <node id="48272" label="1101101101" cy:nodeId="14664">
    <graphics z="0.0" y="-1135.222283034535" x="-778.8193817212676"/>
  </node>
  <node id="48271" label="0101101101" cy:nodeId="14665">
    <graphics z="0.0" y="-1029.97496858141" x="-689.6898651197051"/>
  </node>
  <node id="48270" label="1100011110" cy:nodeId="14666">
    <graphics z="0.0" y="-1155.9804617454724" x="-927.9171600415801"/>
  </node>
  <node id="48269" label="1100011101" cy:nodeId="14667">
    <graphics z="0.0" y="-176.32836213609733" x="-114.55300904060357"/>
  </node>
  <node id="48268" label="0100011110" cy:nodeId="14668">
    <graphics z="0.0" y="-1078.371697097035" x="-910.0515594556426"/>
  </node>
  <node id="48267" label="0100011101" cy:nodeId="14669">
    <graphics z="0.0" y="-73.80332246324576" x="-72.15968323493951"/>
  </node>
  <node id="48266" label="0110110011" cy:nodeId="14670">
    <graphics z="0.0" y="751.1295236060902" x="-30.83596039558404"/>
  </node>
  <node id="48265" label="1110110011" cy:nodeId="14671">
    <graphics z="0.0" y="741.4034493873402" x="-118.94274903083794"/>
  </node>
  <node id="48264" label="1011101100" cy:nodeId="14672">
    <graphics z="0.0" y="-1011.3067556907848" x="-166.35192871833794"/>
  </node>
  <node id="48263" label="1001101101" cy:nodeId="14673">
    <graphics z="0.0" y="-667.0432058860973" x="-864.5878753736114"/>
  </node>
  <node id="48262" label="0101101010" cy:nodeId="14674">
    <graphics z="0.0" y="-903.3444754173473" x="-763.5479583814239"/>
  </node>
  <node id="48261" label="0101001011" cy:nodeId="14675">
    <graphics z="0.0" y="-937.3788992454723" x="-140.1737670972442"/>
  </node>
  <node id="48260" label="1101101010" cy:nodeId="14676">
    <graphics z="0.0" y="-997.6130301048473" x="-810.8455047681426"/>
  </node>
  <node id="48259" label="1101001011" cy:nodeId="14677">
    <graphics z="0.0" y="-991.5148855735973" x="-255.63914490486138"/>
  </node>
  <node id="48258" label="0000011110" cy:nodeId="14678">
    <graphics z="0.0" y="-467.5560232689098" x="-961.1305389478301"/>
  </node>
  <node id="48257" label="0000011101" cy:nodeId="14679">
    <graphics z="0.0" y="468.46848234632455" x="-110.40702820564263"/>
  </node>
  <node id="48256" label="1000011110" cy:nodeId="14680">
    <graphics z="0.0" y="-647.1967703392223" x="-998.3341522290801"/>
  </node>
  <node id="48255" label="1000011101" cy:nodeId="14681">
    <graphics z="0.0" y="369.2611459205433" x="-186.5210113599395"/>
  </node>
  <node id="48254" label="0011101100" cy:nodeId="14682">
    <graphics z="0.0" y="-937.2783133079723" x="-52.99014282966607"/>
  </node>
  <node id="48253" label="0001101101" cy:nodeId="14683">
    <graphics z="0.0" y="-629.7748953392223" x="-763.8398895337676"/>
  </node>
  <node id="48252" label="0001001011" cy:nodeId="14684">
    <graphics z="0.0" y="-378.6129080345348" x="-180.95475769783013"/>
  </node>
  <node id="48251" label="1001001011" cy:nodeId="14685">
    <graphics z="0.0" y="-499.4958426048473" x="-241.69477844978326"/>
  </node>
  <node id="48250" label="1010110011" cy:nodeId="14686">
    <graphics z="0.0" y="1243.8960030982776" x="-116.95523072029107"/>
  </node>
  <node id="48249" label="0010110011" cy:nodeId="14687">
    <graphics z="0.0" y="1285.9045480201526" x="4.398681633224555"/>
  </node>
  <node id="48248" label="0100110011" cy:nodeId="14688">
    <graphics z="0.0" y="1097.6745675514026" x="-529.5096893384551"/>
  </node>
  <node id="48247" label="1100110011" cy:nodeId="14689">
    <graphics z="0.0" y="1061.4785836646838" x="-633.0983123853301"/>
  </node>
  <node id="48246" label="0110101101" cy:nodeId="14690">
    <graphics z="0.0" y="-253.6960073997692" x="-1241.3599090650177"/>
  </node>
  <node id="48245" label="0110101100" cy:nodeId="14691">
    <graphics z="0.0" y="-362.3909842064098" x="-1215.0831756665802"/>
  </node>
  <node id="48244" label="1110101101" cy:nodeId="14692">
    <graphics z="0.0" y="-332.0617605735973" x="-1335.1981659009552"/>
  </node>
  <node id="48243" label="1110101100" cy:nodeId="14693">
    <graphics z="0.0" y="-438.4778372337536" x="-1309.8917694165802"/>
  </node>
  <node id="48242" label="1010101101" cy:nodeId="14694">
    <graphics z="0.0" y="310.9249185035511" x="-1355.0258026197052"/>
  </node>
  <node id="48241" label="0010101101" cy:nodeId="14695">
    <graphics z="0.0" y="377.74455961683236" x="-1245.9714813306427"/>
  </node>
  <node id="48240" label="1110001011" cy:nodeId="14696">
    <graphics z="0.0" y="-205.84365144273795" x="-852.1566009595489"/>
  </node>
  <node id="48239" label="0110001011" cy:nodeId="14697">
    <graphics z="0.0" y="-92.38610139390983" x="-785.7115326001739"/>
  </node>
  <node id="48238" label="1000110011" cy:nodeId="14698">
    <graphics z="0.0" y="1605.03626188734" x="-660.0341644361114"/>
  </node>
  <node id="48237" label="0000110011" cy:nodeId="14699">
    <graphics z="0.0" y="1692.47376188734" x="-520.7100067212676"/>
  </node>
  <node id="48236" label="0111110101" cy:nodeId="14700">
    <graphics z="0.0" y="-589.3148123314098" x="1361.5251007006073"/>
  </node>
  <node id="48235" label="1010001011" cy:nodeId="14701">
    <graphics z="0.0" y="358.3603890846058" x="-862.9828949048614"/>
  </node>
  <node id="48234" label="0010001011" cy:nodeId="14702">
    <graphics z="0.0" y="390.7366403053089" x="-721.9315033032989"/>
  </node>
  <node id="48233" label="1111110101" cy:nodeId="14703">
    <graphics z="0.0" y="-752.8181692650036" x="1125.2437286302948"/>
  </node>
  <node id="48232" label="1111010011" cy:nodeId="14704">
    <graphics z="0.0" y="-598.1837698509411" x="1669.5147247240448"/>
  </node>
  <node id="48231" label="0111010011" cy:nodeId="14705">
    <graphics z="0.0" y="-453.8405691673473" x="1763.2472686693573"/>
  </node>
  <node id="48230" label="1011110101" cy:nodeId="14706">
    <graphics z="0.0" y="-186.70201936265983" x="1153.3177032396698"/>
  </node>
  <node id="48229" label="0011110101" cy:nodeId="14707">
    <graphics z="0.0" y="-17.238899855823888" x="1311.2984161302948"/>
  </node>
  <node id="48228" label="1100101101" cy:nodeId="14708">
    <graphics z="0.0" y="36.57281431653939" x="-1798.5481414868927"/>
  </node>
  <node id="48227" label="0100101101" cy:nodeId="14709">
    <graphics z="0.0" y="90.86012396314584" x="-1682.6768035962677"/>
  </node>
  <node id="48226" label="0100101100" cy:nodeId="14710">
    <graphics z="0.0" y="-11.185845046253576" x="-1632.1951141431427"/>
  </node>
  <node id="48225" label="1011010011" cy:nodeId="14711">
    <graphics z="0.0" y="-60.66599336168326" x="1654.8416290209198"/>
  </node>
  <node id="48224" label="0011010011" cy:nodeId="14712">
    <graphics z="0.0" y="88.19577345350228" x="1772.5231475756073"/>
  </node>
  <node id="48223" label="0010101100" cy:nodeId="14713">
    <graphics z="0.0" y="199.80638060071908" x="-1154.6521453931427"/>
  </node>
  <node id="48222" label="0001101100" cy:nodeId="14714">
    <graphics z="0.0" y="-689.6404959251598" x="-659.8638763501739"/>
  </node>
  <node id="48221" label="0000101101" cy:nodeId="14715">
    <graphics z="0.0" y="691.6344064185902" x="-1677.9767303540802"/>
  </node>
  <node id="48220" label="0000101100" cy:nodeId="14716">
    <graphics z="0.0" y="563.8333199928089" x="-1641.0978241040802"/>
  </node>
  <node id="48219" label="1100101100" cy:nodeId="14717">
    <graphics z="0.0" y="-97.7804800560192" x="-1746.2407684400177"/>
  </node>
  <node id="48218" label="1010101100" cy:nodeId="14718">
    <graphics z="0.0" y="100.75425657728158" x="-1248.2241668775177"/>
  </node>
  <node id="48217" label="1001101100" cy:nodeId="14719">
    <graphics z="0.0" y="-778.2251516868786" x="-769.9415741040801"/>
  </node>
  <node id="48216" label="1000101101" cy:nodeId="14720">
    <graphics z="0.0" y="574.2508004615589" x="-1795.8582000806427"/>
  </node>
  <node id="48215" label="1000101100" cy:nodeId="14721">
    <graphics z="0.0" y="451.1474679420277" x="-1719.3776092603302"/>
  </node>
  <node id="48214" label="0100001011" cy:nodeId="14722">
    <graphics z="0.0" y="310.96494230726205" x="-1251.5669403150177"/>
  </node>
  <node id="48213" label="1100001011" cy:nodeId="14723">
    <graphics z="0.0" y="227.2111962745472" x="-1354.5725555493927"/>
  </node>
  <node id="48212" label="1000001011" cy:nodeId="14724">
    <graphics z="0.0" y="751.2515328834339" x="-1366.5564422681427"/>
  </node>
  <node id="48211" label="0000001011" cy:nodeId="14725">
    <graphics z="0.0" y="869.6382516334339" x="-1284.8838348462677"/>
  </node>
  <node id="48210" label="1101110101" cy:nodeId="14726">
    <graphics z="0.0" y="-296.0020071556286" x="653.2640533373261"/>
  </node>
  <node id="48209" label="0101110101" cy:nodeId="14727">
    <graphics z="0.0" y="-240.26784577867545" x="770.3452911302949"/>
  </node>
  <node id="48208" label="0111101100" cy:nodeId="14728">
    <graphics z="0.0" y="-1482.507439284535" x="-79.41801453376763"/>
  </node>
  <node id="48207" label="0111001110" cy:nodeId="14729">
    <graphics z="0.0" y="-2079.59703889391" x="-172.38378906990044"/>
  </node>
  <node id="48206" label="0111001101" cy:nodeId="14730">
    <graphics z="0.0" y="-1467.9955984642224" x="601.8601226732636"/>
  </node>
  <node id="48205" label="0111001100" cy:nodeId="14731">
    <graphics z="0.0" y="-1610.530388503285" x="639.8717803881074"/>
  </node>
  <node id="48204" label="1111101100" cy:nodeId="14732">
    <graphics z="0.0" y="-1574.5554129173474" x="-167.66275025154107"/>
  </node>
  <node id="48203" label="1111001110" cy:nodeId="14733">
    <graphics z="0.0" y="-2183.521111159535" x="-279.0212555005645"/>
  </node>
  <node id="48202" label="1111001101" cy:nodeId="14734">
    <graphics z="0.0" y="-1566.24645295641" x="549.2783965990449"/>
  </node>
  <node id="48201" label="1101010011" cy:nodeId="14735">
    <graphics z="0.0" y="-267.35256257555045" x="1206.5479278490448"/>
  </node>
  <node id="48200" label="0101010011" cy:nodeId="14736">
    <graphics z="0.0" y="-173.9508902122692" x="1265.3891143724823"/>
  </node>
  <node id="48199" label="1001110101" cy:nodeId="14737">
    <graphics z="0.0" y="280.7410958717152" x="616.6768340990449"/>
  </node>
  <node id="48198" label="0001110101" cy:nodeId="14738">
    <graphics z="0.0" y="397.02622160413705" x="749.6630401537324"/>
  </node>
  <node id="48197" label="0011001110" cy:nodeId="14739">
    <graphics z="0.0" y="-1701.753533034535" x="-220.55967713142388"/>
  </node>
  <node id="48196" label="0011001101" cy:nodeId="14740">
    <graphics z="0.0" y="-938.1375662376598" x="584.9597320482636"/>
  </node>
  <node id="48195" label="1111001100" cy:nodeId="14741">
    <graphics z="0.0" y="-1701.2238699485974" x="522.5151824877167"/>
  </node>
  <node id="48194" label="1011001110" cy:nodeId="14742">
    <graphics z="0.0" y="-1816.588493972035" x="-278.041641242752"/>
  </node>
  <node id="48193" label="1011001101" cy:nodeId="14743">
    <graphics z="0.0" y="-1037.1306082298474" x="553.2910919115449"/>
  </node>
  <node id="48192" label="0001010011" cy:nodeId="14744">
    <graphics z="0.0" y="465.8742745826527" x="1294.9348907396698"/>
  </node>
  <node id="48191" label="1001010011" cy:nodeId="14745">
    <graphics z="0.0" y="367.8176186988636" x="1216.2646026537323"/>
  </node>
  <node id="48190" label="1110110101" cy:nodeId="14746">
    <graphics z="0.0" y="477.2850717017933" x="146.69724272941596"/>
  </node>
  <node id="48189" label="0110110101" cy:nodeId="14747">
    <graphics z="0.0" y="623.7761300514027" x="241.06954955314643"/>
  </node>
  <node id="48188" label="0101101100" cy:nodeId="14748">
    <graphics z="0.0" y="-1096.8940359642224" x="-615.8536834790801"/>
  </node>
  <node id="48187" label="0101001110" cy:nodeId="14749">
    <graphics z="0.0" y="-1787.6528250267224" x="-623.9492034986114"/>
  </node>
  <node id="48186" label="0101001101" cy:nodeId="14750">
    <graphics z="0.0" y="-1115.475212722035" x="47.9143905565644"/>
  </node>
  <node id="48185" label="1101101100" cy:nodeId="14751">
    <graphics z="0.0" y="-1203.08922639391" x="-748.2137298657989"/>
  </node>
  <node id="48184" label="1101001110" cy:nodeId="14752">
    <graphics z="0.0" y="-1872.4848562767224" x="-732.7661590650176"/>
  </node>
  <node id="48183" label="1101001101" cy:nodeId="14753">
    <graphics z="0.0" y="-1233.0983816673474" x="-4.053894050369195"/>
  </node>
  <node id="48182" label="1011001100" cy:nodeId="14754">
    <graphics z="0.0" y="-1161.1323172142224" x="562.4568023607636"/>
  </node>
  <node id="48181" label="1001001110" cy:nodeId="14755">
    <graphics z="0.0" y="-1515.34215608141" x="-817.9787445142364"/>
  </node>
  <node id="48180" label="1001001101" cy:nodeId="14756">
    <graphics z="0.0" y="-707.7381521751598" x="-50.552734382400445"/>
  </node>
  <node id="48179" label="0111110010" cy:nodeId="14757">
    <graphics z="0.0" y="-511.3618094017223" x="1171.1417999193573"/>
  </node>
  <node id="48178" label="0111100011" cy:nodeId="14758">
    <graphics z="0.0" y="-234.50258698961295" x="172.9150237963105"/>
  </node>
  <node id="48177" label="0110010011" cy:nodeId="14759">
    <graphics z="0.0" y="722.7090524146839" x="769.3603057787324"/>
  </node>
  <node id="48176" label="0011001100" cy:nodeId="14760">
    <graphics z="0.0" y="-1074.198845534535" x="630.2503814623261"/>
  </node>
  <node id="48175" label="0001001110" cy:nodeId="14761">
    <graphics z="0.0" y="-1377.69323030016" x="-782.8945770337676"/>
  </node>
  <node id="48174" label="0001001101" cy:nodeId="14762">
    <graphics z="0.0" y="-595.2264944603161" x="-33.42744446540826"/>
  </node>
  <node id="48173" label="1110010011" cy:nodeId="14763">
    <graphics z="0.0" y="627.5179513404652" x="691.0974883959199"/>
  </node>
  <node id="48172" label="1111110010" cy:nodeId="14764">
    <graphics z="0.0" y="-595.7283865501598" x="1107.3313751146698"/>
  </node>
  <node id="48171" label="1111100011" cy:nodeId="14765">
    <graphics z="0.0" y="-300.85427155992545" x="59.28522490715034"/>
  </node>
  <node id="48170" label="0010110101" cy:nodeId="14766">
    <graphics z="0.0" y="1058.5831979224963" x="123.39147948478706"/>
  </node>
  <node id="48169" label="1010110101" cy:nodeId="14767">
    <graphics z="0.0" y="999.8974679420277" x="55.77841948722846"/>
  </node>
  <node id="48168" label="1011110010" cy:nodeId="14768">
    <graphics z="0.0" y="0.3028787086292368" x="972.4733428881074"/>
  </node>
  <node id="48167" label="1011100011" cy:nodeId="14769">
    <graphics z="0.0" y="141.744317383556" x="146.96804045890815"/>
  </node>
  <node id="48166" label="0011110010" cy:nodeId="14770">
    <graphics z="0.0" y="111.44103559949838" x="1126.6610870287323"/>
  </node>
  <node id="48165" label="0011100011" cy:nodeId="14771">
    <graphics z="0.0" y="275.5956185767933" x="249.32014464591987"/>
  </node>
  <node id="48164" label="0010010011" cy:nodeId="14772">
    <graphics z="0.0" y="1220.24134001234" x="764.9642486498261"/>
  </node>
  <node id="48163" label="1010010011" cy:nodeId="14773">
    <graphics z="0.0" y="1125.6984322974963" x="658.3186187670136"/>
  </node>
  <node id="48162" label="1111111100" cy:nodeId="14774">
    <graphics z="0.0" y="-1693.055779128285" x="847.1471710131074"/>
  </node>
  <node id="48161" label="1111111001" cy:nodeId="14775">
    <graphics z="0.0" y="-658.5044485618786" x="1465.6532745287323"/>
  </node>
  <node id="48160" label="0111111100" cy:nodeId="14776">
    <graphics z="0.0" y="-1612.1406179954724" x="908.7621002123261"/>
  </node>
  <node id="48159" label="0111111001" cy:nodeId="14777">
    <graphics z="0.0" y="-537.8624197532848" x="1564.5063018724823"/>
  </node>
  <node id="48158" label="1100110101" cy:nodeId="14778">
    <graphics z="0.0" y="848.0833810279652" x="-432.3032074048614"/>
  </node>
  <node id="48157" label="0100110101" cy:nodeId="14779">
    <graphics z="0.0" y="918.1238473365589" x="-333.57804871345513"/>
  </node>
  <node id="48156" label="0110001110" cy:nodeId="14780">
    <graphics z="0.0" y="-1132.6647879173474" x="-1262.9347381665802"/>
  </node>
  <node id="48155" label="0110001101" cy:nodeId="14781">
    <graphics z="0.0" y="-375.5856863548473" x="-592.3571014478301"/>
  </node>
  <node id="48154" label="0110001100" cy:nodeId="14782">
    <graphics z="0.0" y="-463.8715139915661" x="-522.0391082837676"/>
  </node>
  <node id="48153" label="1110001110" cy:nodeId="14783">
    <graphics z="0.0" y="-1246.5580984642224" x="-1321.0885467603302"/>
  </node>
  <node id="48152" label="1110001101" cy:nodeId="14784">
    <graphics z="0.0" y="-486.2888723900036" x="-604.9656219556426"/>
  </node>
  <node id="48151" label="1101110010" cy:nodeId="14785">
    <graphics z="0.0" y="-166.72777619859733" x="558.986190788498"/>
  </node>
  <node id="48150" label="1101100011" cy:nodeId="14786">
    <graphics z="0.0" y="-14.2815786888317" x="-505.4123382642364"/>
  </node>
  <node id="48149" label="0101110010" cy:nodeId="14787">
    <graphics z="0.0" y="-97.1173941185192" x="665.6909332201386"/>
  </node>
  <node id="48148" label="0101100011" cy:nodeId="14788">
    <graphics z="0.0" y="88.55749449232064" x="-436.42057801033013"/>
  </node>
  <node id="48147" label="1100010011" cy:nodeId="14789">
    <graphics z="0.0" y="953.1424630592152" x="253.16069030021674"/>
  </node>
  <node id="48146" label="0000110101" cy:nodeId="14790">
    <graphics z="0.0" y="1541.69592985609" x="-306.5359039380645"/>
  </node>
  <node id="48145" label="0100010011" cy:nodeId="14791">
    <graphics z="0.0" y="1054.4442819068713" x="239.36831664299018"/>
  </node>
  <node id="48144" label="1011111100" cy:nodeId="14792">
    <graphics z="0.0" y="-1170.18248811266" x="791.9071807787324"/>
  </node>
  <node id="48143" label="1011111001" cy:nodeId="14793">
    <graphics z="0.0" y="-83.17438569566764" x="1442.3544464037323"/>
  </node>
  <node id="48142" label="0011111100" cy:nodeId="14794">
    <graphics z="0.0" y="-1007.0849539329723" x="969.9281768724824"/>
  </node>
  <node id="48141" label="0011111001" cy:nodeId="14795">
    <graphics z="0.0" y="64.43732771375619" x="1474.7003936693573"/>
  </node>
  <node id="48140" label="1000110101" cy:nodeId="14796">
    <graphics z="0.0" y="1469.805060715465" x="-492.1491546704864"/>
  </node>
  <node id="48139" label="1011100010" cy:nodeId="14797">
    <graphics z="0.0" y="97.84071669080697" x="105.66123961662299"/>
  </node>
  <node id="48138" label="1001110010" cy:nodeId="14798">
    <graphics z="0.0" y="384.87595304944955" x="459.20487975334174"/>
  </node>
  <node id="48137" label="1001100011" cy:nodeId="14799">
    <graphics z="0.0" y="367.0899117896839" x="-447.1401214673614"/>
  </node>
  <node id="48136" label="0010001110" cy:nodeId="14800">
    <graphics z="0.0" y="-670.8433767845348" x="-1327.1573944165802"/>
  </node>
  <node id="48135" label="0010001101" cy:nodeId="14801">
    <graphics z="0.0" y="182.900962204723" x="-525.4097137525176"/>
  </node>
  <node id="48134" label="1110001100" cy:nodeId="14802">
    <graphics z="0.0" y="-568.1960379173473" x="-610.1009368970489"/>
  </node>
  <node id="48133" label="1010001110" cy:nodeId="14803">
    <graphics z="0.0" y="-781.1563650657848" x="-1377.5529022290802"/>
  </node>
  <node id="48132" label="1010001101" cy:nodeId="14804">
    <graphics z="0.0" y="127.88481077650033" x="-644.1393890454864"/>
  </node>
  <node id="48131" label="0011100010" cy:nodeId="14805">
    <graphics z="0.0" y="275.5881722877308" x="187.52262877677924"/>
  </node>
  <node id="48130" label="0001110010" cy:nodeId="14806">
    <graphics z="0.0" y="431.8854134986683" x="605.5728912279511"/>
  </node>
  <node id="48129" label="0001100011" cy:nodeId="14807">
    <graphics z="0.0" y="563.1405404517933" x="-410.1094818189239"/>
  </node>
  <node id="48128" label="1000010011" cy:nodeId="14808">
    <graphics z="0.0" y="1511.710822434215" x="53.20620917533881"/>
  </node>
  <node id="48127" label="0000010011" cy:nodeId="14809">
    <graphics z="0.0" y="1621.33801969984" x="127.65569686149604"/>
  </node>
  <node id="48126" label="1111010110" cy:nodeId="14810">
    <graphics z="0.0" y="-1730.22155061266" x="1091.2514190599823"/>
  </node>
  <node id="48125" label="1111010101" cy:nodeId="14811">
    <graphics z="0.0" y="-861.2488333275036" x="1715.7342071459198"/>
  </node>
  <node id="48124" label="1111010100" cy:nodeId="14812">
    <graphics z="0.0" y="-971.7896658470348" x="1809.1189727709198"/>
  </node>
  <node id="48123" label="0111010110" cy:nodeId="14813">
    <graphics z="0.0" y="-1594.7419363548474" x="1162.2785186693573"/>
  </node>
  <node id="48122" label="0111010101" cy:nodeId="14814">
    <graphics z="0.0" y="-693.8960501243786" x="1837.6945342943573"/>
  </node>
  <node id="48121" label="0111010100" cy:nodeId="14815">
    <graphics z="0.0" y="-842.9630667259411" x="1879.7866973802948"/>
  </node>
  <node id="48120" label="0011010110" cy:nodeId="14816">
    <graphics z="0.0" y="-1079.759880690785" x="1234.2998809740448"/>
  </node>
  <node id="48119" label="0011010101" cy:nodeId="14817">
    <graphics z="0.0" y="-140.94536653062858" x="1829.8423614427948"/>
  </node>
  <node id="48118" label="1011010110" cy:nodeId="14818">
    <graphics z="0.0" y="-1193.62194123766" x="1162.3778839037323"/>
  </node>
  <node id="48117" label="1011010101" cy:nodeId="14819">
    <graphics z="0.0" y="-270.4224173118786" x="1787.5980987474823"/>
  </node>
  <node id="48116" label="0101111100" cy:nodeId="14820">
    <graphics z="0.0" y="-1248.41588655016" x="352.6207427904511"/>
  </node>
  <node id="48115" label="0101111001" cy:nodeId="14821">
    <graphics z="0.0" y="-139.2162710716442" x="969.4126739427949"/>
  </node>
  <node id="48114" label="1101111100" cy:nodeId="14822">
    <graphics z="0.0" y="-1337.175408034535" x="244.90979003166206"/>
  </node>
  <node id="48113" label="1101111001" cy:nodeId="14823">
    <graphics z="0.0" y="-243.21489778062858" x="937.2810821459199"/>
  </node>
  <node id="48112" label="0101001100" cy:nodeId="14824">
    <graphics z="0.0" y="-1263.98473420641" x="112.57917784904487"/>
  </node>
  <node id="48111" label="0100001110" cy:nodeId="14825">
    <graphics z="0.0" y="-758.9260183860973" x="-1650.9462127759552"/>
  </node>
  <node id="48110" label="0100001101" cy:nodeId="14826">
    <graphics z="0.0" y="5.956435532359706" x="-1000.4873504712676"/>
  </node>
  <node id="48109" label="0100001100" cy:nodeId="14827">
    <graphics z="0.0" y="-121.49538484117545" x="-1016.9617157056426"/>
  </node>
  <node id="48108" label="1101001100" cy:nodeId="14828">
    <graphics z="0.0" y="-1322.80065217516" x="-8.808151252517632"/>
  </node>
  <node id="48107" label="1100001110" cy:nodeId="14829">
    <graphics z="0.0" y="-892.1020437767223" x="-1704.3684539868927"/>
  </node>
  <node id="48106" label="1100001101" cy:nodeId="14830">
    <graphics z="0.0" y="-52.15296235582389" x="-1090.1223602368927"/>
  </node>
  <node id="48105" label="1001111100" cy:nodeId="14831">
    <graphics z="0.0" y="-851.7085501243786" x="242.143661491623"/>
  </node>
  <node id="48104" label="1001111001" cy:nodeId="14832">
    <graphics z="0.0" y="280.55934843519174" x="967.0756378099824"/>
  </node>
  <node id="48103" label="0001111100" cy:nodeId="14833">
    <graphics z="0.0" y="-673.1193167259411" x="358.1142730638886"/>
  </node>
  <node id="48102" label="0001111001" cy:nodeId="14834">
    <graphics z="0.0" y="399.6211312721058" x="1055.0806426927948"/>
  </node>
  <node id="48101" label="0110110010" cy:nodeId="14835">
    <graphics z="0.0" y="647.3277047584339" x="-6.9796676709746635"/>
  </node>
  <node id="48100" label="0110100011" cy:nodeId="14836">
    <graphics z="0.0" y="920.6669991920277" x="-1004.9849090650176"/>
  </node>
  <node id="48099" label="0110100010" cy:nodeId="14837">
    <graphics z="0.0" y="811.4696114967152" x="-974.6726532056426"/>
  </node>
  <node id="48098" label="1110110010" cy:nodeId="14838">
    <graphics z="0.0" y="628.6333688209339" x="-99.60496521736138"/>
  </node>
  <node id="48097" label="1110100011" cy:nodeId="14839">
    <graphics z="0.0" y="894.6825021217152" x="-1094.3732147290802"/>
  </node>
  <node id="48096" label="1100001100" cy:nodeId="14840">
    <graphics z="0.0" y="-198.85851350328483" x="-1098.8141326978302"/>
  </node>
  <node id="48095" label="1010001100" cy:nodeId="14841">
    <graphics z="0.0" y="42.98085722425424" x="-633.6589813306426"/>
  </node>
  <node id="48094" label="1001001100" cy:nodeId="14842">
    <graphics z="0.0" y="-820.7612844993786" x="-17.197372443923882"/>
  </node>
  <node id="48093" label="1000001110" cy:nodeId="14843">
    <graphics z="0.0" y="-386.2638784935192" x="-1809.3176727368927"/>
  </node>
  <node id="48092" label="1000001101" cy:nodeId="14844">
    <graphics z="0.0" y="479.1364816139027" x="-1152.2284393384552"/>
  </node>
  <node id="48091" label="1000001100" cy:nodeId="14845">
    <graphics z="0.0" y="394.2711862037464" x="-1075.1620330884552"/>
  </node>
  <node id="48090" label="0010001100" cy:nodeId="14846">
    <graphics z="0.0" y="64.07876524427377" x="-541.5479583814239"/>
  </node>
  <node id="48089" label="0001001100" cy:nodeId="14847">
    <graphics z="0.0" y="-746.8124929954723" x="36.48606108879096"/>
  </node>
  <node id="48088" label="0000001110" cy:nodeId="14848">
    <graphics z="0.0" y="-231.33620515367545" x="-1782.6056366040802"/>
  </node>
  <node id="48087" label="0000001101" cy:nodeId="14849">
    <graphics z="0.0" y="632.2285836646839" x="-1090.4287567212677"/>
  </node>
  <node id="48086" label="0000001100" cy:nodeId="14850">
    <graphics z="0.0" y="479.5190499732777" x="-1027.7449188306427"/>
  </node>
  <node id="48085" label="1101010110" cy:nodeId="14851">
    <graphics z="0.0" y="-1403.7329031517224" x="565.4902801439667"/>
  </node>
  <node id="48084" label="1101010101" cy:nodeId="14852">
    <graphics z="0.0" y="-442.1649710228161" x="1379.6189727709198"/>
  </node>
  <node id="48083" label="0101010110" cy:nodeId="14853">
    <graphics z="0.0" y="-1248.39049592516" x="702.2829132006074"/>
  </node>
  <node id="48082" label="0101010101" cy:nodeId="14854">
    <graphics z="0.0" y="-360.8264700462536" x="1406.8083038256073"/>
  </node>
  <node id="48081" label="1110100010" cy:nodeId="14855">
    <graphics z="0.0" y="781.3501046607777" x="-1102.5010223462677"/>
  </node>
  <node id="48080" label="1010110010" cy:nodeId="14856">
    <graphics z="0.0" y="1163.69739469984" x="-190.603164680252"/>
  </node>
  <node id="48079" label="1010100011" cy:nodeId="14857">
    <graphics z="0.0" y="1291.7912667701526" x="-1104.1768035962677"/>
  </node>
  <node id="48078" label="0010110010" cy:nodeId="14858">
    <graphics z="0.0" y="1205.9973214576526" x="-21.341018684158257"/>
  </node>
  <node id="48077" label="0010100011" cy:nodeId="14859">
    <graphics z="0.0" y="1380.651740402965" x="-966.5983123853301"/>
  </node>
  <node id="48076" label="0011010100" cy:nodeId="14860">
    <graphics z="0.0" y="-266.9822622825817" x="1926.5305938646698"/>
  </node>
  <node id="48075" label="0001010110" cy:nodeId="14861">
    <graphics z="0.0" y="-729.1203543235973" x="626.2796173021699"/>
  </node>
  <node id="48074" label="0001010101" cy:nodeId="14862">
    <graphics z="0.0" y="282.1783517310902" x="1385.6360626146698"/>
  </node>
  <node id="48073" label="1011010100" cy:nodeId="14863">
    <graphics z="0.0" y="-380.30031648180045" x="1880.6074981615448"/>
  </node>
  <node id="48072" label="1001010110" cy:nodeId="14864">
    <graphics z="0.0" y="-810.8411184837536" x="549.361434929123"/>
  </node>
  <node id="48071" label="1001010101" cy:nodeId="14865">
    <graphics z="0.0" y="155.36722120740853" x="1340.8546905443573"/>
  </node>
  <node id="48070" label="0110111100" cy:nodeId="14866">
    <graphics z="0.0" y="-385.8904959251598" x="-286.255752570877"/>
  </node>
  <node id="48069" label="0110111001" cy:nodeId="14867">
    <graphics z="0.0" y="667.4426949928089" x="477.66963195060737"/>
  </node>
  <node id="48068" label="1110111100" cy:nodeId="14868">
    <graphics z="0.0" y="-488.7347952415661" x="-339.17948914314263"/>
  </node>
  <node id="48067" label="1110111001" cy:nodeId="14869">
    <graphics z="0.0" y="609.1730111549183" x="422.2495269701386"/>
  </node>
  <node id="48066" label="0100110010" cy:nodeId="14870">
    <graphics z="0.0" y="1001.7277291724964" x="-538.3790741040801"/>
  </node>
  <node id="48065" label="0100100011" cy:nodeId="14871">
    <graphics z="0.0" y="1227.53577360609" x="-1493.6208953931427"/>
  </node>
  <node id="48064" label="0100100010" cy:nodeId="14872">
    <graphics z="0.0" y="1101.455939621715" x="-1487.8774871900177"/>
  </node>
  <node id="48063" label="1100110010" cy:nodeId="14873">
    <graphics z="0.0" y="959.0775826881214" x="-702.4456634595489"/>
  </node>
  <node id="48062" label="1100100011" cy:nodeId="14874">
    <graphics z="0.0" y="1153.753302902965" x="-1612.4373016431427"/>
  </node>
  <node id="48061" label="1010111100" cy:nodeId="14875">
    <graphics z="0.0" y="7.878112168101893" x="-339.63822937751763"/>
  </node>
  <node id="48060" label="1010111001" cy:nodeId="14876">
    <graphics z="0.0" y="1099.4474557349963" x="343.8781890795136"/>
  </node>
  <node id="48059" label="0010111100" cy:nodeId="14877">
    <graphics z="0.0" y="93.71944365003549" x="-299.8744964673614"/>
  </node>
  <node id="48058" label="0010111001" cy:nodeId="14878">
    <graphics z="0.0" y="1212.8554757545276" x="404.76225280021674"/>
  </node>
  <node id="48057" label="1100100010" cy:nodeId="14879">
    <graphics z="0.0" y="992.6881783912464" x="-1592.1199188306427"/>
  </node>
  <node id="48056" label="1010100010" cy:nodeId="14880">
    <graphics z="0.0" y="1219.352912277965" x="-1177.6732635572052"/>
  </node>
  <node id="48055" label="1001100010" cy:nodeId="14881">
    <graphics z="0.0" y="388.93430265882455" x="-528.6362762525176"/>
  </node>
  <node id="48054" label="1000110010" cy:nodeId="14882">
    <graphics z="0.0" y="1479.0744698951526" x="-709.0576629712676"/>
  </node>
  <node id="48053" label="1000100011" cy:nodeId="14883">
    <graphics z="0.0" y="1536.864142746715" x="-1526.4528045728302"/>
  </node>
  <node id="48052" label="1000100010" cy:nodeId="14884">
    <graphics z="0.0" y="1402.9877999732776" x="-1564.2413787915802"/>
  </node>
  <node id="48051" label="0010100010" cy:nodeId="14885">
    <graphics z="0.0" y="1269.2482980201526" x="-987.7877655103301"/>
  </node>
  <node id="48050" label="0001100010" cy:nodeId="14886">
    <graphics z="0.0" y="471.8653634498402" x="-445.41606140876763"/>
  </node>
  <node id="48049" label="0000110010" cy:nodeId="14887">
    <graphics z="0.0" y="1567.05286344984" x="-564.4183807447051"/>
  </node>
  <node id="48048" label="0000100011" cy:nodeId="14888">
    <graphics z="0.0" y="1664.5031808326526" x="-1376.9484100415802"/>
  </node>
  <node id="48047" label="0000100010" cy:nodeId="14889">
    <graphics z="0.0" y="1525.9721749732776" x="-1406.4513397290802"/>
  </node>
  <node id="48046" label="1110010110" cy:nodeId="14890">
    <graphics z="0.0" y="-645.3627859642223" x="41.2068710253144"/>
  </node>
  <node id="48045" label="1110010101" cy:nodeId="14891">
    <graphics z="0.0" y="382.3192819068714" x="852.9846343920136"/>
  </node>
  <node id="48044" label="1110010100" cy:nodeId="14892">
    <graphics z="0.0" y="271.4286569068714" x="861.3711700365449"/>
  </node>
  <node id="48043" label="0110010110" cy:nodeId="14893">
    <graphics z="0.0" y="-480.2484671165661" x="36.36550139640815"/>
  </node>
  <node id="48042" label="0110010101" cy:nodeId="14894">
    <graphics z="0.0" y="472.0538705299183" x="862.6328277513886"/>
  </node>
  <node id="48041" label="0110010100" cy:nodeId="14895">
    <graphics z="0.0" y="374.774009079723" x="931.3471832201386"/>
  </node>
  <node id="48040" label="0111110100" cy:nodeId="14896">
    <graphics z="0.0" y="-729.2604910423473" x="1352.5523223802948"/>
  </node>
  <node id="48039" label="0111100101" cy:nodeId="14897">
    <graphics z="0.0" y="-454.2250906517223" x="314.5534973070527"/>
  </node>
  <node id="48038" label="1111110100" cy:nodeId="14898">
    <graphics z="0.0" y="-858.5784231712536" x="1273.6303253099823"/>
  </node>
  <node id="48037" label="1111100101" cy:nodeId="14899">
    <graphics z="0.0" y="-499.5092703392223" x="262.65995787834174"/>
  </node>
  <node id="48036" label="0010010110" cy:nodeId="14900">
    <graphics z="0.0" y="79.0334962318226" x="0.7363433763886178"/>
  </node>
  <node id="48035" label="0010010101" cy:nodeId="14901">
    <graphics z="0.0" y="1003.9273751685902" x="830.8620147631074"/>
  </node>
  <node id="48034" label="1010010110" cy:nodeId="14902">
    <graphics z="0.0" y="0.8288567970081431" x="-28.134101875076226"/>
  </node>
  <node id="48033" label="1010010101" cy:nodeId="14903">
    <graphics z="0.0" y="869.6379464576527" x="802.0027618334199"/>
  </node>
  <node id="48032" label="0111100010" cy:nodeId="14904">
    <graphics z="0.0" y="-380.2043386985973" x="104.21289061759956"/>
  </node>
  <node id="48031" label="0111000011" cy:nodeId="14905">
    <graphics z="0.0" y="-337.7740408470348" x="917.2566680834199"/>
  </node>
  <node id="48030" label="1100111100" cy:nodeId="14906">
    <graphics z="0.0" y="-101.68373933336295" x="-895.9839325025176"/>
  </node>
  <node id="48029" label="1100111001" cy:nodeId="14907">
    <graphics z="0.0" y="950.0304025123402" x="-128.10350037361138"/>
  </node>
  <node id="48028" label="1011110100" cy:nodeId="14908">
    <graphics z="0.0" y="-287.6718679954723" x="1295.9392852709198"/>
  </node>
  <node id="48027" label="1011100101" cy:nodeId="14909">
    <graphics z="0.0" y="20.86033567884408" x="260.6693725511933"/>
  </node>
  <node id="48026" label="0011110100" cy:nodeId="14910">
    <graphics z="0.0" y="-150.98503938219108" x="1343.3581085131073"/>
  </node>
  <node id="48025" label="0011100101" cy:nodeId="14911">
    <graphics z="0.0" y="130.49257597425424" x="265.9319000170136"/>
  </node>
  <node id="48024" label="0100111100" cy:nodeId="14912">
    <graphics z="0.0" y="-71.31479707262076" x="-718.4013519361114"/>
  </node>
  <node id="48023" label="0100111001" cy:nodeId="14913">
    <graphics z="0.0" y="961.6063302467152" x="-25.46327973152154"/>
  </node>
  <node id="48022" label="1111100010" cy:nodeId="14914">
    <graphics z="0.0" y="-407.4149099876598" x="35.25152205680854"/>
  </node>
  <node id="48021" label="1111000011" cy:nodeId="14915">
    <graphics z="0.0" y="-410.8554617454723" x="808.4202423021699"/>
  </node>
  <node id="48020" label="0000111100" cy:nodeId="14916">
    <graphics z="0.0" y="494.8638070533558" x="-714.7588348462676"/>
  </node>
  <node id="48019" label="0000111001" cy:nodeId="14917">
    <graphics z="0.0" y="1521.6430734107776" x="-56.29368592048638"/>
  </node>
  <node id="48018" label="1011000011" cy:nodeId="14918">
    <graphics z="0.0" y="39.29980406263314" x="842.9984893724824"/>
  </node>
  <node id="48017" label="1000111100" cy:nodeId="14919">
    <graphics z="0.0" y="427.7611764381214" x="-820.6485443189239"/>
  </node>
  <node id="48016" label="1000111001" cy:nodeId="14920">
    <graphics z="0.0" y="1460.7871163795276" x="-177.2588043286895"/>
  </node>
  <node id="48015" label="0011000011" cy:nodeId="14921">
    <graphics z="0.0" y="168.128745407848" x="896.2610626146699"/>
  </node>
  <node id="48014" label="0111011100" cy:nodeId="14922">
    <graphics z="0.0" y="-1512.9128347923474" x="1566.2788848802948"/>
  </node>
  <node id="48013" label="0111011010" cy:nodeId="14923">
    <graphics z="0.0" y="-1364.8369070579724" x="1395.8686065599823"/>
  </node>
  <node id="48012" label="0111011001" cy:nodeId="14924">
    <graphics z="0.0" y="-480.3841482689098" x="2051.7931671068573"/>
  </node>
  <node id="48011" label="1111011100" cy:nodeId="14925">
    <graphics z="0.0" y="-1667.9370047142224" x="1443.3877715990448"/>
  </node>
  <node id="48010" label="1111011010" cy:nodeId="14926">
    <graphics z="0.0" y="-1474.165642409535" x="1296.0585479662323"/>
  </node>
  <node id="48009" label="1111011001" cy:nodeId="14927">
    <graphics z="0.0" y="-598.4371267845348" x="1967.2397003099823"/>
  </node>
  <node id="48008" label="1101010100" cy:nodeId="14928">
    <graphics z="0.0" y="-537.0761648704723" x="1435.7926788256073"/>
  </node>
  <node id="48007" label="1100010110" cy:nodeId="14929">
    <graphics z="0.0" y="-250.31920686265983" x="-577.0654144361114"/>
  </node>
  <node id="48006" label="1100010101" cy:nodeId="14930">
    <graphics z="0.0" y="764.7343209693714" x="277.6537170336152"/>
  </node>
  <node id="48005" label="1100010100" cy:nodeId="14931">
    <graphics z="0.0" y="658.2730172584339" x="325.1110992357636"/>
  </node>
  <node id="48004" label="0101010100" cy:nodeId="14932">
    <graphics z="0.0" y="-413.9851614525036" x="1489.4689483568573"/>
  </node>
  <node id="48003" label="0100010110" cy:nodeId="14933">
    <graphics z="0.0" y="-159.28704133531608" x="-539.3256683423614"/>
  </node>
  <node id="48002" label="0100010101" cy:nodeId="14934">
    <graphics z="0.0" y="851.0037911842152" x="359.48246764396674"/>
  </node>
  <node id="48001" label="0100010100" cy:nodeId="14935">
    <graphics z="0.0" y="745.1277535865589" x="393.1728362963105"/>
  </node>
  <node id="48000" label="0101110100" cy:nodeId="14936">
    <graphics z="0.0" y="-300.3272635032848" x="853.9911651537324"/>
  </node>
  <node id="47999" label="0101100101" cy:nodeId="14937">
    <graphics z="0.0" y="-85.66278901598014" x="-205.03727722908013"/>
  </node>
  <node id="47998" label="1101110100" cy:nodeId="14938">
    <graphics z="0.0" y="-407.6559988548473" x="719.3688507006074"/>
  </node>
  <node id="47997" label="1101100101" cy:nodeId="14939">
    <graphics z="0.0" y="-139.30144563219108" x="-264.1893158032989"/>
  </node>
  <node id="47996" label="1010010100" cy:nodeId="14940">
    <graphics z="0.0" y="788.3858102271839" x="879.7815093920136"/>
  </node>
  <node id="47995" label="1001010100" cy:nodeId="14941">
    <graphics z="0.0" y="67.68293699720346" x="1395.6664581224823"/>
  </node>
  <node id="47994" label="1000010110" cy:nodeId="14942">
    <graphics z="0.0" y="381.1533883521839" x="-611.7283783032989"/>
  </node>
  <node id="47993" label="1000010101" cy:nodeId="14943">
    <graphics z="0.0" y="1342.9743722389026" x="236.34304808830268"/>
  </node>
  <node id="47992" label="1011011100" cy:nodeId="14944">
    <graphics z="0.0" y="-1222.5390554954724" x="1547.5053253099823"/>
  </node>
  <node id="47991" label="1011011010" cy:nodeId="14945">
    <graphics z="0.0" y="-1087.61949983141" x="1360.8502960131073"/>
  </node>
  <node id="47990" label="1011011001" cy:nodeId="14946">
    <graphics z="0.0" y="-116.24497285387076" x="1970.5186309740448"/>
  </node>
  <node id="47989" label="0011011100" cy:nodeId="14947">
    <graphics z="0.0" y="-1089.3474051048474" x="1622.9059600756073"/>
  </node>
  <node id="47988" label="0011011010" cy:nodeId="14948">
    <graphics z="0.0" y="-955.0288015892223" x="1399.7244415209198"/>
  </node>
  <node id="47987" label="0011011001" cy:nodeId="14949">
    <graphics z="0.0" y="36.697890610484706" x="1994.1428985521698"/>
  </node>
  <node id="47986" label="1000010100" cy:nodeId="14950">
    <graphics z="0.0" y="1202.677131027965" x="272.2794494554902"/>
  </node>
  <node id="47985" label="0010010100" cy:nodeId="14951">
    <graphics z="0.0" y="870.6026681373402" x="910.5631256029511"/>
  </node>
  <node id="47984" label="0001010100" cy:nodeId="14952">
    <graphics z="0.0" y="190.98100981214486" x="1449.2631378099823"/>
  </node>
  <node id="47983" label="0000010110" cy:nodeId="14953">
    <graphics z="0.0" y="524.6598580787464" x="-526.9936370923614"/>
  </node>
  <node id="47982" label="0000010101" cy:nodeId="14954">
    <graphics z="0.0" y="1420.29212126234" x="311.37699889396674"/>
  </node>
  <node id="47981" label="0000010100" cy:nodeId="14955">
    <graphics z="0.0" y="1313.1811593482776" x="361.34565734123237"/>
  </node>
  <node id="47980" label="0101100010" cy:nodeId="14956">
    <graphics z="0.0" y="-33.40036836168326" x="-392.1878509595489"/>
  </node>
  <node id="47979" label="0101000011" cy:nodeId="14957">
    <graphics z="0.0" y="-100.15891328355826" x="344.42143248771674"/>
  </node>
  <node id="47978" label="1001110100" cy:nodeId="14958">
    <graphics z="0.0" y="103.46392950513803" x="718.0220489427949"/>
  </node>
  <node id="47977" label="1001100101" cy:nodeId="14959">
    <graphics z="0.0" y="282.12551054456674" x="-197.845352180252"/>
  </node>
  <node id="47976" label="1101100010" cy:nodeId="14960">
    <graphics z="0.0" y="-133.42177644273795" x="-448.7299652173614"/>
  </node>
  <node id="47975" label="1101000011" cy:nodeId="14961">
    <graphics z="0.0" y="-81.86809602281608" x="224.34655760978706"/>
  </node>
  <node id="47974" label="0001110100" cy:nodeId="14962">
    <graphics z="0.0" y="210.84318479993783" x="790.9132232592011"/>
  </node>
  <node id="47973" label="0001100101" cy:nodeId="14963">
    <graphics z="0.0" y="413.4343331764027" x="-271.146133430252"/>
  </node>
  <node id="47972" label="1001000011" cy:nodeId="14964">
    <graphics z="0.0" y="464.6700509498402" x="270.06388854240424"/>
  </node>
  <node id="47971" label="0001000011" cy:nodeId="14965">
    <graphics z="0.0" y="531.3922799537464" x="323.425155632248"/>
  </node>
  <node id="47970" label="1101011100" cy:nodeId="14966">
    <graphics z="0.0" y="-1409.89489045641" x="985.3056793138886"/>
  </node>
  <node id="47969" label="1101011010" cy:nodeId="14967">
    <graphics z="0.0" y="-1209.82408967516" x="897.3247833177949"/>
  </node>
  <node id="47968" label="1101011001" cy:nodeId="14968">
    <graphics z="0.0" y="-282.7299124290661" x="1549.1343536302948"/>
  </node>
  <node id="47967" label="0101011100" cy:nodeId="14969">
    <graphics z="0.0" y="-1346.50231233141" x="1115.8708038256073"/>
  </node>
  <node id="47966" label="0101011010" cy:nodeId="14970">
    <graphics z="0.0" y="-1132.236443190785" x="976.7405548021699"/>
  </node>
  <node id="47965" label="0101011001" cy:nodeId="14971">
    <graphics z="0.0" y="-211.6383902122692" x="1628.3438262865448"/>
  </node>
  <node id="47964" label="1001011100" cy:nodeId="14972">
    <graphics z="0.0" y="-946.4794851829723" x="1049.0878448412323"/>
  </node>
  <node id="47963" label="1001011010" cy:nodeId="14973">
    <graphics z="0.0" y="-747.9730764915661" x="825.3417510912324"/>
  </node>
  <node id="47962" label="1001011001" cy:nodeId="14974">
    <graphics z="0.0" y="212.15351805189096" x="1621.3589630052948"/>
  </node>
  <node id="47961" label="0001011100" cy:nodeId="14975">
    <graphics z="0.0" y="-869.1496511985973" x="970.5644683763886"/>
  </node>
  <node id="47960" label="0001011010" cy:nodeId="14976">
    <graphics z="0.0" y="-642.6306082298473" x="840.8874053881074"/>
  </node>
  <node id="47959" label="0001011001" cy:nodeId="14977">
    <graphics z="0.0" y="330.3367379615589" x="1625.8937530443573"/>
  </node>
  <node id="47958" label="0110110100" cy:nodeId="14978">
    <graphics z="0.0" y="517.3258126685902" x="216.00199889396674"/>
  </node>
  <node id="47957" label="0110100101" cy:nodeId="14979">
    <graphics z="0.0" y="734.9207833717152" x="-827.2499237134551"/>
  </node>
  <node id="47956" label="1110110100" cy:nodeId="14980">
    <graphics z="0.0" y="320.4564889381214" x="106.79786490653998"/>
  </node>
  <node id="47955" label="1110100101" cy:nodeId="14981">
    <graphics z="0.0" y="588.372657151012" x="-940.8864593579864"/>
  </node>
  <node id="47954" label="0110000011" cy:nodeId="14982">
    <graphics z="0.0" y="874.4362252662464" x="-215.1884918286895"/>
  </node>
  <node id="47953" label="1010110100" cy:nodeId="14983">
    <graphics z="0.0" y="828.4725411842152" x="106.58849333976752"/>
  </node>
  <node id="47952" label="1010100101" cy:nodeId="14984">
    <graphics z="0.0" y="1127.037970871715" x="-1000.7178192212676"/>
  </node>
  <node id="47951" label="1110000011" cy:nodeId="14985">
    <graphics z="0.0" y="756.2591012428089" x="-336.3108978345489"/>
  </node>
  <node id="47950" label="0010110100" cy:nodeId="14986">
    <graphics z="0.0" y="959.6760934303089" x="148.0530624315644"/>
  </node>
  <node id="47949" label="0010100101" cy:nodeId="14987">
    <graphics z="0.0" y="1252.3852609107776" x="-913.2572479322051"/>
  </node>
  <node id="47948" label="1010000011" cy:nodeId="14988">
    <graphics z="0.0" y="1229.48108610609" x="-403.88444519783013"/>
  </node>
  <node id="47947" label="0010000011" cy:nodeId="14989">
    <graphics z="0.0" y="1313.665900559215" x="-228.38252259040826"/>
  </node>
  <node id="47946" label="0111101001" cy:nodeId="14990">
    <graphics z="0.0" y="-394.2153250267223" x="623.4322051927949"/>
  </node>
  <node id="47945" label="1111101001" cy:nodeId="14991">
    <graphics z="0.0" y="-470.7065359642223" x="570.6010894701386"/>
  </node>
  <node id="47944" label="0110011100" cy:nodeId="14992">
    <graphics z="0.0" y="-553.6144949485973" x="488.2959136888886"/>
  </node>
  <node id="47943" label="0110011010" cy:nodeId="14993">
    <graphics z="0.0" y="-329.4098440696911" x="294.12817382072456"/>
  </node>
  <node id="47942" label="0110011001" cy:nodeId="14994">
    <graphics z="0.0" y="636.0665963599964" x="1207.2185821459198"/>
  </node>
  <node id="47941" label="1100110100" cy:nodeId="14995">
    <graphics z="0.0" y="726.1325753639027" x="-424.656387336502"/>
  </node>
  <node id="47940" label="1100100101" cy:nodeId="14996">
    <graphics z="0.0" y="969.7901681373402" x="-1457.1394500806427"/>
  </node>
  <node id="47939" label="1110011100" cy:nodeId="14997">
    <graphics z="0.0" y="-630.7452932884411" x="461.113632194748"/>
  </node>
  <node id="47938" label="1110011010" cy:nodeId="14998">
    <graphics z="0.0" y="-388.46181550523795" x="235.93606566642768"/>
  </node>
  <node id="47937" label="1110011001" cy:nodeId="14999">
    <graphics z="0.0" y="544.5211251685902" x="1113.6380157396698"/>
  </node>
  <node id="47936" label="0100110100" cy:nodeId="15000">
    <graphics z="0.0" y="833.8446725318714" x="-305.60722351814263"/>
  </node>
  <node id="47935" label="0100100101" cy:nodeId="15001">
    <graphics z="0.0" y="1078.0919869849963" x="-1346.8348846509552"/>
  </node>
  <node id="47934" label="1010011100" cy:nodeId="15002">
    <graphics z="0.0" y="-54.225884108753576" x="425.543807975998"/>
  </node>
  <node id="47933" label="1010011010" cy:nodeId="15003">
    <graphics z="0.0" y="47.238295883922206" x="194.69522093986518"/>
  </node>
  <node id="47932" label="1010011001" cy:nodeId="15004">
    <graphics z="0.0" y="1051.86780485609" x="1031.187149040451"/>
  </node>
  <node id="47931" label="0010011100" cy:nodeId="15005">
    <graphics z="0.0" y="105.35827764966928" x="509.281356804123"/>
  </node>
  <node id="47930" label="0010011010" cy:nodeId="15006">
    <graphics z="0.0" y="185.9891274879261" x="304.92098998283393"/>
  </node>
  <node id="47929" label="0010011001" cy:nodeId="15007">
    <graphics z="0.0" y="1155.5983956764026" x="996.9440460131074"/>
  </node>
  <node id="47928" label="1011101001" cy:nodeId="15008">
    <graphics z="0.0" y="39.09355101087533" x="500.89152526115424"/>
  </node>
  <node id="47927" label="0011101001" cy:nodeId="15009">
    <graphics z="0.0" y="183.37102827527963" x="537.5747528002167"/>
  </node>
  <node id="47926" label="0000110100" cy:nodeId="15010">
    <graphics z="0.0" y="1412.7055734107776" x="-292.682998664627"/>
  </node>
  <node id="47925" label="0000100101" cy:nodeId="15011">
    <graphics z="0.0" y="1525.464728684215" x="-1245.0039520337677"/>
  </node>
  <node id="47924" label="0100000011" cy:nodeId="15012">
    <graphics z="0.0" y="1206.61389860609" x="-811.1945648267364"/>
  </node>
  <node id="47923" label="1100000011" cy:nodeId="15013">
    <graphics z="0.0" y="1051.88196501234" x="-899.9306488111114"/>
  </node>
  <node id="47922" label="1000110100" cy:nodeId="15014">
    <graphics z="0.0" y="1325.99475798109" x="-342.5522308423614"/>
  </node>
  <node id="47921" label="1000100101" cy:nodeId="15015">
    <graphics z="0.0" y="1383.39466032484" x="-1381.5341034009552"/>
  </node>
  <node id="47920" label="1000000011" cy:nodeId="15016">
    <graphics z="0.0" y="1629.0642159889026" x="-937.9222259595489"/>
  </node>
  <node id="47919" label="0000000011" cy:nodeId="15017">
    <graphics z="0.0" y="1728.7368234107776" x="-843.0215301587676"/>
  </node>
  <node id="47918" label="0111100100" cy:nodeId="15018">
    <graphics z="0.0" y="-579.3948294212536" x="349.57051085685737"/>
  </node>
  <node id="47917" label="0111000110" cy:nodeId="15019">
    <graphics z="0.0" y="-1448.9929129173474" x="188.95655822013862"/>
  </node>
  <node id="47916" label="0111000101" cy:nodeId="15020">
    <graphics z="0.0" y="-564.5677420189098" x="980.7960357592011"/>
  </node>
  <node id="47915" label="0111000100" cy:nodeId="15021">
    <graphics z="0.0" y="-671.1676565696911" x="1048.0710601732635"/>
  </node>
  <node id="47914" label="1111100100" cy:nodeId="15022">
    <graphics z="0.0" y="-715.7058645775036" x="250.40255736564643"/>
  </node>
  <node id="47913" label="1111000110" cy:nodeId="15023">
    <graphics z="0.0" y="-1646.1765066673474" x="236.9822387621308"/>
  </node>
  <node id="47912" label="1111000101" cy:nodeId="15024">
    <graphics z="0.0" y="-660.2690969993786" x="971.1248321459199"/>
  </node>
  <node id="47911" label="1100011100" cy:nodeId="15025">
    <graphics z="0.0" y="-285.7244192650036" x="-113.10450745368951"/>
  </node>
  <node id="47910" label="1100011010" cy:nodeId="15026">
    <graphics z="0.0" y="-84.80762544176139" x="-305.0930023267364"/>
  </node>
  <node id="47909" label="1100011001" cy:nodeId="15027">
    <graphics z="0.0" y="886.7487252662464" x="628.1685943529511"/>
  </node>
  <node id="47908" label="0100011100" cy:nodeId="15028">
    <graphics z="0.0" y="-213.74285188219108" x="-32.8999404981231"/>
  </node>
  <node id="47907" label="0100011010" cy:nodeId="15029">
    <graphics z="0.0" y="18.59403929212533" x="-142.70019531990044"/>
  </node>
  <node id="47906" label="0100011001" cy:nodeId="15030">
    <graphics z="0.0" y="978.0390695045277" x="717.9597930834199"/>
  </node>
  <node id="47905" label="1111000100" cy:nodeId="15031">
    <graphics z="0.0" y="-822.8326956321911" x="1076.9721832201385"/>
  </node>
  <node id="47904" label="1011100100" cy:nodeId="15032">
    <graphics z="0.0" y="-143.90981355211295" x="240.086044304123"/>
  </node>
  <node id="47903" label="1011000110" cy:nodeId="15033">
    <graphics z="0.0" y="-1093.258415847035" x="180.2807998583222"/>
  </node>
  <node id="47902" label="1011000101" cy:nodeId="15034">
    <graphics z="0.0" y="-91.6414419700817" x="911.8164215013886"/>
  </node>
  <node id="47901" label="0101101001" cy:nodeId="15035">
    <graphics z="0.0" y="-2.1108557274059194" x="103.33818053459174"/>
  </node>
  <node id="47900" label="1101101001" cy:nodeId="15036">
    <graphics z="0.0" y="-81.63330903551139" x="35.847839348068305"/>
  </node>
  <node id="47899" label="0011100100" cy:nodeId="15037">
    <graphics z="0.0" y="-9.20864167711295" x="337.5549468920136"/>
  </node>
  <node id="47898" label="0011000110" cy:nodeId="15038">
    <graphics z="0.0" y="-923.9500662376598" x="192.4110488817597"/>
  </node>
  <node id="47897" label="0011000101" cy:nodeId="15039">
    <graphics z="0.0" y="16.555602402476893" x="1060.8501739427948"/>
  </node>
  <node id="47896" label="1000011100" cy:nodeId="15040">
    <graphics z="0.0" y="241.48185667493783" x="-78.88377381111138"/>
  </node>
  <node id="47895" label="1000011010" cy:nodeId="15041">
    <graphics z="0.0" y="517.6400216529652" x="-351.21479798103326"/>
  </node>
  <node id="47894" label="1000011001" cy:nodeId="15042">
    <graphics z="0.0" y="1380.091681809215" x="588.2933502123261"/>
  </node>
  <node id="47893" label="0000011100" cy:nodeId="15043">
    <graphics z="0.0" y="346.61342558362924" x="-46.235786445388726"/>
  </node>
  <node id="47892" label="0000011010" cy:nodeId="15044">
    <graphics z="0.0" y="531.1062081764027" x="-262.78999329353326"/>
  </node>
  <node id="47891" label="0000011001" cy:nodeId="15045">
    <graphics z="0.0" y="1458.973517746715" x="650.4109649584199"/>
  </node>
  <node id="47890" label="1011101000" cy:nodeId="15046">
    <graphics z="0.0" y="28.733611435680018" x="636.7268218920136"/>
  </node>
  <node id="47889" label="1001101001" cy:nodeId="15047">
    <graphics z="0.0" y="448.13950285413705" x="14.876083366622993"/>
  </node>
  <node id="47888" label="0011101000" cy:nodeId="15048">
    <graphics z="0.0" y="107.94811949232064" x="602.2109527513886"/>
  </node>
  <node id="47887" label="0001101001" cy:nodeId="15049">
    <graphics z="0.0" y="535.7261422584339" x="74.76673888420112"/>
  </node>
  <node id="47886" label="0101100100" cy:nodeId="15050">
    <graphics z="0.0" y="-224.20192780992545" x="-171.93171692634576"/>
  </node>
  <node id="47885" label="0101000110" cy:nodeId="15051">
    <graphics z="0.0" y="-1067.5244070579724" x="-396.028457649002"/>
  </node>
  <node id="47884" label="0101000101" cy:nodeId="15052">
    <graphics z="0.0" y="-248.58452668687858" x="535.3154144213105"/>
  </node>
  <node id="47883" label="1101100100" cy:nodeId="15053">
    <graphics z="0.0" y="-273.2311331321911" x="-284.3965911939239"/>
  </node>
  <node id="47882" label="1101000110" cy:nodeId="15054">
    <graphics z="0.0" y="-1206.3952566673474" x="-389.6994781568145"/>
  </node>
  <node id="47881" label="1101000101" cy:nodeId="15055">
    <graphics z="0.0" y="-279.4232107689098" x="429.68717955802924"/>
  </node>
  <node id="47880" label="1011000100" cy:nodeId="15056">
    <graphics z="0.0" y="-220.11425080797233" x="1025.7841949388885"/>
  </node>
  <node id="47879" label="1001100100" cy:nodeId="15057">
    <graphics z="0.0" y="169.62766966321908" x="-218.84764099861138"/>
  </node>
  <node id="47878" label="1001000110" cy:nodeId="15058">
    <graphics z="0.0" y="-680.9163748314098" x="-448.52787781501763"/>
  </node>
  <node id="47877" label="1001000101" cy:nodeId="15059">
    <graphics z="0.0" y="270.0898049781605" x="450.73384093498237"/>
  </node>
  <node id="47876" label="0011000100" cy:nodeId="15060">
    <graphics z="0.0" y="-106.17615571519889" x="1081.5476837084198"/>
  </node>
  <node id="47875" label="0001100100" cy:nodeId="15061">
    <graphics z="0.0" y="316.6257241676136" x="-263.85856629158013"/>
  </node>
  <node id="47874" label="0001000110" cy:nodeId="15062">
    <graphics z="0.0" y="-559.8163382103161" x="-425.87382508064263"/>
  </node>
  <node id="47873" label="0001000101" cy:nodeId="15063">
    <graphics z="0.0" y="352.12119230726205" x="525.692733757248"/>
  </node>
  <node id="47872" label="0110101001" cy:nodeId="15064">
    <graphics z="0.0" y="750.9681466529652" x="-616.6818695142364"/>
  </node>
  <node id="47871" label="0110101000" cy:nodeId="15065">
    <graphics z="0.0" y="772.7232736060902" x="-511.33781433845513"/>
  </node>
  <node id="47870" label="1110101001" cy:nodeId="15066">
    <graphics z="0.0" y="774.5786202857777" x="-689.6733856275176"/>
  </node>
  <node id="47869" label="1110101000" cy:nodeId="15067">
    <graphics z="0.0" y="662.7236398170277" x="-570.0651702954864"/>
  </node>
  <node id="47868" label="1010101001" cy:nodeId="15068">
    <graphics z="0.0" y="1285.8637765357776" x="-778.8980560376739"/>
  </node>
  <node id="47867" label="0010101001" cy:nodeId="15069">
    <graphics z="0.0" y="1327.51087126234" x="-670.1891326978301"/>
  </node>
  <node id="47866" label="0111111000" cy:nodeId="15070">
    <graphics z="0.0" y="-667.8597342064098" x="1605.4824981615448"/>
  </node>
  <node id="47865" label="0111110001" cy:nodeId="15071">
    <graphics z="0.0" y="397.9895699928089" x="1796.8203887865448"/>
  </node>
  <node id="47864" label="1111111000" cy:nodeId="15072">
    <graphics z="0.0" y="-781.8735281517223" x="1524.9610137865448"/>
  </node>
  <node id="47863" label="1111110001" cy:nodeId="15073">
    <graphics z="0.0" y="283.1714242408558" x="1755.7165069506073"/>
  </node>
  <node id="47862" label="0110100100" cy:nodeId="15074">
    <graphics z="0.0" y="598.7127755592152" x="-825.7654876782989"/>
  </node>
  <node id="47861" label="0110000110" cy:nodeId="15075">
    <graphics z="0.0" y="-378.4276968528942" x="-916.3318328931426"/>
  </node>
  <node id="47860" label="0110000101" cy:nodeId="15076">
    <graphics z="0.0" y="609.3855660865589" x="-200.24406433845513"/>
  </node>
  <node id="47859" label="0110000100" cy:nodeId="15077">
    <graphics z="0.0" y="548.0397103736683" x="-55.24699402595513"/>
  </node>
  <node id="47858" label="1110100100" cy:nodeId="15078">
    <graphics z="0.0" y="438.2542794654652" x="-928.3812713697051"/>
  </node>
  <node id="47857" label="1110000110" cy:nodeId="15079">
    <graphics z="0.0" y="-579.9034353782848" x="-966.0176239087676"/>
  </node>
  <node id="47856" label="1110000101" cy:nodeId="15080">
    <graphics z="0.0" y="515.2630685279652" x="-180.765274055252"/>
  </node>
  <node id="47855" label="1011111000" cy:nodeId="15081">
    <graphics z="0.0" y="-160.59435334703483" x="1498.9746856615448"/>
  </node>
  <node id="47854" label="1011110001" cy:nodeId="15082">
    <graphics z="0.0" y="777.2869943092152" x="1645.0674590990448"/>
  </node>
  <node id="47853" label="0011111000" cy:nodeId="15083">
    <graphics z="0.0" y="-43.56142488023795" x="1546.1324005052948"/>
  </node>
  <node id="47852" label="0011110001" cy:nodeId="15084">
    <graphics z="0.0" y="906.3956979224964" x="1699.7941436693573"/>
  </node>
  <node id="47851" label="1100101001" cy:nodeId="15085">
    <graphics z="0.0" y="1081.32190641859" x="-1231.9863739087677"/>
  </node>
  <node id="47850" label="0100101001" cy:nodeId="15086">
    <graphics z="0.0" y="1130.2666085670276" x="-1089.6949920728302"/>
  </node>
  <node id="47849" label="0100101000" cy:nodeId="15087">
    <graphics z="0.0" y="1015.9689401099964" x="-1066.3918914868927"/>
  </node>
  <node id="47848" label="0010100100" cy:nodeId="15088">
    <graphics z="0.0" y="1093.4709542701526" x="-822.4585418775176"/>
  </node>
  <node id="47847" label="0010000110" cy:nodeId="15089">
    <graphics z="0.0" y="225.5420525977894" x="-981.8862762525176"/>
  </node>
  <node id="47846" label="0010000101" cy:nodeId="15090">
    <graphics z="0.0" y="1115.5700143287463" x="-26.956253059158257"/>
  </node>
  <node id="47845" label="1110000100" cy:nodeId="15091">
    <graphics z="0.0" y="371.4108041236683" x="-126.22776795173638"/>
  </node>
  <node id="47844" label="1010100100" cy:nodeId="15092">
    <graphics z="0.0" y="966.2495797584339" x="-899.2014007642364"/>
  </node>
  <node id="47843" label="1010000110" cy:nodeId="15093">
    <graphics z="0.0" y="92.19307455518685" x="-1024.6730194165802"/>
  </node>
  <node id="47842" label="1010000101" cy:nodeId="15094">
    <graphics z="0.0" y="1095.0598214576526" x="-225.13908386970513"/>
  </node>
  <node id="47841" label="1100101000" cy:nodeId="15095">
    <graphics z="0.0" y="980.1105416724964" x="-1197.7086639478302"/>
  </node>
  <node id="47840" label="1010101000" cy:nodeId="15096">
    <graphics z="0.0" y="1165.9165109107776" x="-602.0918426587676"/>
  </node>
  <node id="47839" label="1001101000" cy:nodeId="15097">
    <graphics z="0.0" y="293.40390715101205" x="-0.7392730786895072"/>
  </node>
  <node id="47838" label="1000101001" cy:nodeId="15098">
    <graphics z="0.0" y="1606.0107491920276" x="-1135.0980682447052"/>
  </node>
  <node id="47837" label="1000101000" cy:nodeId="15099">
    <graphics z="0.0" y="1434.5781320045276" x="-1111.6006317212677"/>
  </node>
  <node id="47836" label="0010101000" cy:nodeId="15100">
    <graphics z="0.0" y="1259.3078683326526" x="-537.0857391431426"/>
  </node>
  <node id="47835" label="0001101000" cy:nodeId="15101">
    <graphics z="0.0" y="389.1474679420277" x="88.49867438529975"/>
  </node>
  <node id="47834" label="0000101001" cy:nodeId="15102">
    <graphics z="0.0" y="1726.9475167701526" x="-1059.2900848462677"/>
  </node>
  <node id="47833" label="0000101000" cy:nodeId="15103">
    <graphics z="0.0" y="1552.469123215465" x="-1016.6339569165801"/>
  </node>
  <node id="47832" label="0101111000" cy:nodeId="15104">
    <graphics z="0.0" y="-301.8501516868786" x="1066.2690582201385"/>
  </node>
  <node id="47831" label="0101110001" cy:nodeId="15105">
    <graphics z="0.0" y="757.4289620826527" x="1372.8374786302948"/>
  </node>
  <node id="47830" label="1101111000" cy:nodeId="15106">
    <graphics z="0.0" y="-383.2442556907848" x="1001.5320587084199"/>
  </node>
  <node id="47829" label="1101110001" cy:nodeId="15107">
    <graphics z="0.0" y="648.1707223365589" x="1337.6490020677948"/>
  </node>
  <node id="47828" label="0111101000" cy:nodeId="15108">
    <graphics z="0.0" y="-520.5057913353161" x="647.3651885912324"/>
  </node>
  <node id="47827" label="0111001010" cy:nodeId="15109">
    <graphics z="0.0" y="-1331.304314284535" x="433.327743522873"/>
  </node>
  <node id="47826" label="0111001001" cy:nodeId="15110">
    <graphics z="0.0" y="-460.9382254173473" x="1282.2669219896698"/>
  </node>
  <node id="47825" label="0111001000" cy:nodeId="15111">
    <graphics z="0.0" y="-567.0830008079723" x="1264.3382110521698"/>
  </node>
  <node id="47824" label="1111101000" cy:nodeId="15112">
    <graphics z="0.0" y="-595.2524954368786" x="655.9597930834199"/>
  </node>
  <node id="47823" label="1111001010" cy:nodeId="15113">
    <graphics z="0.0" y="-1480.4829031517224" x="322.0046234056855"/>
  </node>
  <node id="47822" label="1111001001" cy:nodeId="15114">
    <graphics z="0.0" y="-621.5819021751598" x="1241.8155059740448"/>
  </node>
  <node id="47821" label="0101000100" cy:nodeId="15115">
    <graphics z="0.0" y="-347.30739655992545" x="541.8242950365449"/>
  </node>
  <node id="47820" label="0100100100" cy:nodeId="15116">
    <graphics z="0.0" y="977.8804391334339" x="-1314.3661346509552"/>
  </node>
  <node id="47819" label="0100000110" cy:nodeId="15117">
    <graphics z="0.0" y="-8.419670729847326" x="-1398.7198944165802"/>
  </node>
  <node id="47818" label="0100000101" cy:nodeId="15118">
    <graphics z="0.0" y="923.2087472389027" x="-630.1158294751739"/>
  </node>
  <node id="47817" label="0100000100" cy:nodeId="15119">
    <graphics z="0.0" y="847.2058175514027" x="-592.9357757642364"/>
  </node>
  <node id="47816" label="1101000100" cy:nodeId="15120">
    <graphics z="0.0" y="-427.6054617454723" x="477.04988097404487"/>
  </node>
  <node id="47815" label="1100100100" cy:nodeId="15121">
    <graphics z="0.0" y="870.5696481178089" x="-1429.7217254712677"/>
  </node>
  <node id="47814" label="1100000110" cy:nodeId="15122">
    <graphics z="0.0" y="-200.31774201890983" x="-1413.2581024243927"/>
  </node>
  <node id="47813" label="1100000101" cy:nodeId="15123">
    <graphics z="0.0" y="847.5193551490589" x="-769.6796722486114"/>
  </node>
  <node id="47812" label="1001111000" cy:nodeId="15124">
    <graphics z="0.0" y="197.01100859144174" x="1001.5669708177949"/>
  </node>
  <node id="47811" label="1001110001" cy:nodeId="15125">
    <graphics z="0.0" y="1111.6255563209338" x="1263.8004913256073"/>
  </node>
  <node id="47810" label="0001111000" cy:nodeId="15126">
    <graphics z="0.0" y="289.0792153785511" x="1105.3632354662323"/>
  </node>
  <node id="47809" label="0001110001" cy:nodeId="15127">
    <graphics z="0.0" y="1239.61438688734" x="1291.7019805834198"/>
  </node>
  <node id="47808" label="1111001000" cy:nodeId="15128">
    <graphics z="0.0" y="-737.7648855735973" x="1232.1836700365448"/>
  </node>
  <node id="47807" label="1011001010" cy:nodeId="15129">
    <graphics z="0.0" y="-945.7447439720348" x="338.59065245841987"/>
  </node>
  <node id="47806" label="1011001001" cy:nodeId="15130">
    <graphics z="0.0" y="0.09811338880501808" x="1159.5297393724823"/>
  </node>
  <node id="47805" label="1011001000" cy:nodeId="15131">
    <graphics z="0.0" y="-82.63317170640983" x="1227.2394561693573"/>
  </node>
  <node id="47804" label="0011001010" cy:nodeId="15132">
    <graphics z="0.0" y="-792.1397635032848" x="381.643417350998"/>
  </node>
  <node id="47803" label="0011001001" cy:nodeId="15133">
    <graphics z="0.0" y="148.8065846870228" x="1230.7707061693573"/>
  </node>
  <node id="47802" label="0011001000" cy:nodeId="15134">
    <graphics z="0.0" y="74.90385374525033" x="1251.7110137865448"/>
  </node>
  <node id="47801" label="1100000100" cy:nodeId="15135">
    <graphics z="0.0" y="689.7116158912464" x="-702.1130828931426"/>
  </node>
  <node id="47800" label="1010000100" cy:nodeId="15136">
    <graphics z="0.0" y="963.9497750709339" x="-209.33662415290826"/>
  </node>
  <node id="47799" label="1001000100" cy:nodeId="15137">
    <graphics z="0.0" y="98.23118910291635" x="409.60514830802924"/>
  </node>
  <node id="47798" label="1000100100" cy:nodeId="15138">
    <graphics z="0.0" y="1274.944220871715" x="-1326.9960174634552"/>
  </node>
  <node id="47797" label="1000000110" cy:nodeId="15139">
    <graphics z="0.0" y="539.8361581275745" x="-1527.5748748853302"/>
  </node>
  <node id="47796" label="1000000101" cy:nodeId="15140">
    <graphics z="0.0" y="1398.473517746715" x="-800.3295745923614"/>
  </node>
  <node id="47795" label="1000000100" cy:nodeId="15141">
    <graphics z="0.0" y="1231.4577706764026" x="-711.1846771314239"/>
  </node>
  <node id="47794" label="0010000100" cy:nodeId="15142">
    <graphics z="0.0" y="1054.6415475318713" x="-127.69392395759576"/>
  </node>
  <node id="47793" label="0001000100" cy:nodeId="15143">
    <graphics z="0.0" y="288.8571694801136" x="394.2043609545136"/>
  </node>
  <node id="47792" label="0000100100" cy:nodeId="15144">
    <graphics z="0.0" y="1369.26721891859" x="-1244.1526336743927"/>
  </node>
  <node id="47791" label="0000000110" cy:nodeId="15145">
    <graphics z="0.0" y="674.4738229224964" x="-1447.4736785962677"/>
  </node>
  <node id="47790" label="0000000101" cy:nodeId="15146">
    <graphics z="0.0" y="1479.2380441139026" x="-607.7538909986114"/>
  </node>
  <node id="47789" label="0000000100" cy:nodeId="15147">
    <graphics z="0.0" y="1371.87024626234" x="-568.5678558423614"/>
  </node>
  <node id="47788" label="1101101000" cy:nodeId="15148">
    <graphics z="0.0" y="-196.60344758531608" x="78.71717452262885"/>
  </node>
  <node id="47787" label="1101001010" cy:nodeId="15149">
    <graphics z="0.0" y="-1107.741814284535" x="-86.12629700447076"/>
  </node>
  <node id="47786" label="1101001001" cy:nodeId="15150">
    <graphics z="0.0" y="-185.54039826890983" x="652.3701934740449"/>
  </node>
  <node id="47785" label="0101101000" cy:nodeId="15151">
    <graphics z="0.0" y="-138.03115144273795" x="112.49354552482612"/>
  </node>
  <node id="47784" label="0101001010" cy:nodeId="15152">
    <graphics z="0.0" y="-1009.9864431907848" x="-49.91197205329888"/>
  </node>
  <node id="47783" label="0101001001" cy:nodeId="15153">
    <graphics z="0.0" y="-81.67458405992545" x="796.9287872240449"/>
  </node>
  <node id="47782" label="0110111000" cy:nodeId="15154">
    <graphics z="0.0" y="643.8762887428089" x="588.4621124193574"/>
  </node>
  <node id="47781" label="0110110001" cy:nodeId="15155">
    <graphics z="0.0" y="1501.7614816139026" x="824.7358550951386"/>
  </node>
  <node id="47780" label="1110111000" cy:nodeId="15156">
    <graphics z="0.0" y="544.5446237037464" x="497.75456237052924"/>
  </node>
  <node id="47779" label="1110110001" cy:nodeId="15157">
    <graphics z="0.0" y="1404.6906808326526" x="748.9648590013886"/>
  </node>
  <node id="47778" label="1001001010" cy:nodeId="15158">
    <graphics z="0.0" y="-600.9108816673473" x="-153.2094116284942"/>
  </node>
  <node id="47777" label="1001001001" cy:nodeId="15159">
    <graphics z="0.0" y="385.1421273658558" x="671.1549835131074"/>
  </node>
  <node id="47776" label="0001001010" cy:nodeId="15160">
    <graphics z="0.0" y="-430.7271658470348" x="-106.4823608472442"/>
  </node>
  <node id="47775" label="0001001001" cy:nodeId="15161">
    <graphics z="0.0" y="544.473487229137" x="806.1841583177949"/>
  </node>
  <node id="47774" label="1010111000" cy:nodeId="15162">
    <graphics z="0.0" y="990.4506905982777" x="420.6666412279511"/>
  </node>
  <node id="47773" label="1010110001" cy:nodeId="15163">
    <graphics z="0.0" y="1781.3339913795276" x="618.8629302904511"/>
  </node>
  <node id="47772" label="0010111000" cy:nodeId="15164">
    <graphics z="0.0" y="1078.4916451881213" x="450.9948882982636"/>
  </node>
  <node id="47771" label="0010110001" cy:nodeId="15165">
    <graphics z="0.0" y="1877.691291184215" x="699.1963043138886"/>
  </node>
  <node id="47770" label="1100111000" cy:nodeId="15166">
    <graphics z="0.0" y="858.3934396217152" x="-80.09437561775201"/>
  </node>
  <node id="47769" label="1100110001" cy:nodeId="15167">
    <graphics z="0.0" y="1697.22132048109" x="189.5096816942597"/>
  </node>
  <node id="47768" label="0100111000" cy:nodeId="15168">
    <graphics z="0.0" y="896.1530221412464" x="26.667156212081977"/>
  </node>
  <node id="47767" label="0100110001" cy:nodeId="15169">
    <graphics z="0.0" y="1774.83069548109" x="317.7490081713105"/>
  </node>
  <node id="47766" label="0110001010" cy:nodeId="15170">
    <graphics z="0.0" y="-202.31926789781608" x="-705.1952972486114"/>
  </node>
  <node id="47765" label="0110001001" cy:nodeId="15171">
    <graphics z="0.0" y="765.3582223365589" x="147.61210631584174"/>
  </node>
  <node id="47764" label="0110001000" cy:nodeId="15172">
    <graphics z="0.0" y="680.4934762428089" x="206.92965697502143"/>
  </node>
  <node id="47763" label="1110001010" cy:nodeId="15173">
    <graphics z="0.0" y="-235.46645417711295" x="-764.2663421704864"/>
  </node>
  <node id="47762" label="1110001001" cy:nodeId="15174">
    <graphics z="0.0" y="709.3490060279652" x="62.910589210739204"/>
  </node>
  <node id="47761" label="0000111000" cy:nodeId="15175">
    <graphics z="0.0" y="1402.7697823951526" x="-4.619949348220757"/>
  </node>
  <node id="47760" label="0000110001" cy:nodeId="15176">
    <graphics z="0.0" y="2183.043341965465" x="297.8182983324433"/>
  </node>
  <node id="47759" label="1000111000" cy:nodeId="15177">
    <graphics z="0.0" y="1357.45667204359" x="-110.79199219490044"/>
  </node>
  <node id="47758" label="1000110001" cy:nodeId="15178">
    <graphics z="0.0" y="2095.9921945045276" x="181.0068740770722"/>
  </node>
  <node id="47757" label="0010001010" cy:nodeId="15179">
    <graphics z="0.0" y="312.8930581519886" x="-683.1483001782989"/>
  </node>
  <node id="47756" label="0010001001" cy:nodeId="15180">
    <graphics z="0.0" y="1312.152228684215" x="135.40171050285346"/>
  </node>
  <node id="47755" label="0010001000" cy:nodeId="15181">
    <graphics z="0.0" y="1176.902716965465" x="196.98568724845893"/>
  </node>
  <node id="47754" label="1110001000" cy:nodeId="15182">
    <graphics z="0.0" y="618.790137619762" x="107.86749648307807"/>
  </node>
  <node id="47753" label="1010001010" cy:nodeId="15183">
    <graphics z="0.0" y="248.37102446058236" x="-781.8776702954864"/>
  </node>
  <node id="47752" label="1010001001" cy:nodeId="15184">
    <graphics z="0.0" y="1224.0029366920276" x="84.84782599662788"/>
  </node>
  <node id="47751" label="1010001000" cy:nodeId="15185">
    <graphics z="0.0" y="1115.72473844984" x="67.51766871665961"/>
  </node>
  <node id="47750" label="1111011000" cy:nodeId="15186">
    <graphics z="0.0" y="-774.3029715110973" x="2013.2859649584198"/>
  </node>
  <node id="47749" label="1111010010" cy:nodeId="15187">
    <graphics z="0.0" y="-725.8759085228161" x="1702.6153106615448"/>
  </node>
  <node id="47748" label="1111010001" cy:nodeId="15188">
    <graphics z="0.0" y="181.18701872327767" x="2126.6073760912323"/>
  </node>
  <node id="47747" label="1111010000" cy:nodeId="15189">
    <graphics z="0.0" y="33.04208311536752" x="2217.9792022631073"/>
  </node>
  <node id="47746" label="0111011000" cy:nodeId="15190">
    <graphics z="0.0" y="-627.3691946556286" x="2106.3502960131073"/>
  </node>
  <node id="47745" label="0111010010" cy:nodeId="15191">
    <graphics z="0.0" y="-575.1002737571911" x="1820.4816436693573"/>
  </node>
  <node id="47744" label="0111010001" cy:nodeId="15192">
    <graphics z="0.0" y="313.8603890846058" x="2227.4860382006073"/>
  </node>
  <node id="47743" label="0111010000" cy:nodeId="15193">
    <graphics z="0.0" y="162.76617750623666" x="2302.1085967943573"/>
  </node>
  <node id="47742" label="1011011000" cy:nodeId="15194">
    <graphics z="0.0" y="-262.9157034446911" x="2066.6273956224823"/>
  </node>
  <node id="47741" label="1011010010" cy:nodeId="15195">
    <graphics z="0.0" y="-133.9529654075817" x="1704.1372833177948"/>
  </node>
  <node id="47740" label="1011010001" cy:nodeId="15196">
    <graphics z="0.0" y="666.8955148170277" x="2073.1576690599823"/>
  </node>
  <node id="47739" label="1011010000" cy:nodeId="15197">
    <graphics z="0.0" y="497.2849801490589" x="2175.1923370287323"/>
  </node>
  <node id="47738" label="0011011000" cy:nodeId="15198">
    <graphics z="0.0" y="-125.25197663805045" x="2100.5014190599823"/>
  </node>
  <node id="47737" label="0011010010" cy:nodeId="15199">
    <graphics z="0.0" y="-43.82961335680045" x="1777.0949249193573"/>
  </node>
  <node id="47736" label="0011010001" cy:nodeId="15200">
    <graphics z="0.0" y="807.7801583717152" x="2119.7702178881073"/>
  </node>
  <node id="47735" label="0011010000" cy:nodeId="15201">
    <graphics z="0.0" y="657.8961251685902" x="2234.2921905443573"/>
  </node>
  <node id="47734" label="0101001000" cy:nodeId="15202">
    <graphics z="0.0" y="-156.76226106187858" x="801.4516754076386"/>
  </node>
  <node id="47733" label="0100001010" cy:nodeId="15203">
    <graphics z="0.0" y="212.60559782484017" x="-1249.2013397290802"/>
  </node>
  <node id="47732" label="0100001001" cy:nodeId="15204">
    <graphics z="0.0" y="1086.9904244849963" x="-371.93000794197076"/>
  </node>
  <node id="47731" label="0100001000" cy:nodeId="15205">
    <graphics z="0.0" y="1006.2401193092152" x="-306.61225891853326"/>
  </node>
  <node id="47730" label="1101001000" cy:nodeId="15206">
    <graphics z="0.0" y="-328.9275442650036" x="741.1280670092011"/>
  </node>
  <node id="47729" label="1100001010" cy:nodeId="15207">
    <graphics z="0.0" y="96.37803015211068" x="-1320.1598358228302"/>
  </node>
  <node id="47728" label="1100001001" cy:nodeId="15208">
    <graphics z="0.0" y="1002.5807565162464" x="-450.5937347486114"/>
  </node>
  <node id="47727" label="0001001000" cy:nodeId="15209">
    <graphics z="0.0" y="320.22148832776986" x="737.0454864427949"/>
  </node>
  <node id="47726" label="0000001010" cy:nodeId="15210">
    <graphics z="0.0" y="745.7837594459339" x="-1263.8047332837677"/>
  </node>
  <node id="47725" label="0000001001" cy:nodeId="15211">
    <graphics z="0.0" y="1692.7507394264026" x="-367.9568023755645"/>
  </node>
  <node id="47724" label="0000001000" cy:nodeId="15212">
    <graphics z="0.0" y="1462.0241769264026" x="-385.69441223884576"/>
  </node>
  <node id="47723" label="1100001000" cy:nodeId="15213">
    <graphics z="0.0" y="903.3438790748402" x="-478.99125672126763"/>
  </node>
  <node id="47722" label="1001001000" cy:nodeId="15214">
    <graphics z="0.0" y="228.70082792737924" x="670.8441314623261"/>
  </node>
  <node id="47721" label="1000001010" cy:nodeId="15215">
    <graphics z="0.0" y="560.6240914771839" x="-1336.5040741040802"/>
  </node>
  <node id="47720" label="1000001001" cy:nodeId="15216">
    <graphics z="0.0" y="1576.2990792701526" x="-431.71968079353326"/>
  </node>
  <node id="47719" label="1000001000" cy:nodeId="15217">
    <graphics z="0.0" y="1356.323615402965" x="-440.49784851814263"/>
  </node>
  <node id="47718" label="1101011000" cy:nodeId="15218">
    <graphics z="0.0" y="-443.8236013939098" x="1653.1175079271698"/>
  </node>
  <node id="47717" label="1101010010" cy:nodeId="15219">
    <graphics z="0.0" y="-350.5217825462536" x="1252.2165069506073"/>
  </node>
  <node id="47716" label="1101010001" cy:nodeId="15220">
    <graphics z="0.0" y="553.2485421607777" x="1804.0369415209198"/>
  </node>
  <node id="47715" label="0101011000" cy:nodeId="15221">
    <graphics z="0.0" y="-336.3267141868786" x="1690.6765899584198"/>
  </node>
  <node id="47714" label="0101010010" cy:nodeId="15222">
    <graphics z="0.0" y="-234.7165152122692" x="1433.7497100756073"/>
  </node>
  <node id="47713" label="0101010001" cy:nodeId="15223">
    <graphics z="0.0" y="655.5600655982777" x="1890.0547637865448"/>
  </node>
  <node id="47712" label="1001011000" cy:nodeId="15224">
    <graphics z="0.0" y="88.23534330823861" x="1657.2397003099823"/>
  </node>
  <node id="47711" label="1001010010" cy:nodeId="15225">
    <graphics z="0.0" y="270.6396554420277" x="1241.8864288256073"/>
  </node>
  <node id="47710" label="1001010001" cy:nodeId="15226">
    <graphics z="0.0" y="1059.7975533912463" x="1719.4362335131073"/>
  </node>
  <node id="47709" label="0001011000" cy:nodeId="15227">
    <graphics z="0.0" y="154.66203245618783" x="1571.8141632006073"/>
  </node>
  <node id="47708" label="0001010010" cy:nodeId="15228">
    <graphics z="0.0" y="388.9329904029652" x="1322.1404571459198"/>
  </node>
  <node id="47707" label="0001010001" cy:nodeId="15229">
    <graphics z="0.0" y="1194.17737516859" x="1787.2600860521698"/>
  </node>
  <node id="47706" label="1110011000" cy:nodeId="15230">
    <graphics z="0.0" y="449.9198678443714" x="1140.6035919115448"/>
  </node>
  <node id="47705" label="1110010010" cy:nodeId="15231">
    <graphics z="0.0" y="514.8388741920277" x="695.9755401537324"/>
  </node>
  <node id="47704" label="1110010001" cy:nodeId="15232">
    <graphics z="0.0" y="1368.07825407484" x="1305.6614532396698"/>
  </node>
  <node id="47703" label="1110010000" cy:nodeId="15233">
    <graphics z="0.0" y="1227.15149626234" x="1443.5254669115448"/>
  </node>
  <node id="47702" label="0110011000" cy:nodeId="15234">
    <graphics z="0.0" y="511.3017953346058" x="1228.7282257006073"/>
  </node>
  <node id="47701" label="0110010010" cy:nodeId="15235">
    <graphics z="0.0" y="640.4799264381214" x="828.0603790209199"/>
  </node>
  <node id="47700" label="0110010001" cy:nodeId="15236">
    <graphics z="0.0" y="1395.3278878639026" x="1451.5456085131073"/>
  </node>
  <node id="47699" label="0110010000" cy:nodeId="15237">
    <graphics z="0.0" y="1273.536994309215" x="1540.2937774584198"/>
  </node>
  <node id="47698" label="0111110000" cy:nodeId="15238">
    <graphics z="0.0" y="277.6744454810902" x="1915.4273223802948"/>
  </node>
  <node id="47697" label="0111100001" cy:nodeId="15239">
    <graphics z="0.0" y="670.0699532935902" x="956.5881500170136"/>
  </node>
  <node id="47696" label="1111110000" cy:nodeId="15240">
    <graphics z="0.0" y="196.99829039075814" x="1847.2497100756073"/>
  </node>
  <node id="47695" label="1111100001" cy:nodeId="15241">
    <graphics z="0.0" y="572.6124642799183" x="905.6494293138886"/>
  </node>
  <node id="47694" label="0010011000" cy:nodeId="15242">
    <graphics z="0.0" y="1002.5658639381214" x="1167.5281524584198"/>
  </node>
  <node id="47693" label="0010010010" cy:nodeId="15243">
    <graphics z="0.0" y="1088.1488717506213" x="748.2930450365449"/>
  </node>
  <node id="47692" label="0010010001" cy:nodeId="15244">
    <graphics z="0.0" y="1769.46350798109" x="1304.0503692552948"/>
  </node>
  <node id="47691" label="0010010000" cy:nodeId="15245">
    <graphics z="0.0" y="1632.4045480201526" x="1418.8513946459198"/>
  </node>
  <node id="47690" label="1010011000" cy:nodeId="15246">
    <graphics z="0.0" y="903.8216622779652" x="1126.0124053881073"/>
  </node>
  <node id="47689" label="1010010010" cy:nodeId="15247">
    <graphics z="0.0" y="1006.3606637428089" x="622.0265655443574"/>
  </node>
  <node id="47688" label="1010010001" cy:nodeId="15248">
    <graphics z="0.0" y="1675.44007048109" x="1191.7915801927948"/>
  </node>
  <node id="47687" label="1010010000" cy:nodeId="15249">
    <graphics z="0.0" y="1543.25940641859" x="1295.3911895677948"/>
  </node>
  <node id="47686" label="1011110000" cy:nodeId="15250">
    <graphics z="0.0" y="656.9363473365589" x="1695.1997833177948"/>
  </node>
  <node id="47685" label="1011100001" cy:nodeId="15251">
    <graphics z="0.0" y="1004.3670113990589" x="911.0146026537324"/>
  </node>
  <node id="47684" label="0011110000" cy:nodeId="15252">
    <graphics z="0.0" y="774.3359445045277" x="1801.0786895677948"/>
  </node>
  <node id="47683" label="0011100001" cy:nodeId="15253">
    <graphics z="0.0" y="1112.7058175514026" x="887.9583282396699"/>
  </node>
  <node id="47682" label="0101010000" cy:nodeId="15254">
    <graphics z="0.0" y="546.9127572486683" x="1977.8943633959198"/>
  </node>
  <node id="47681" label="0100011000" cy:nodeId="15255">
    <graphics z="0.0" y="821.5025094459339" x="708.0811309740449"/>
  </node>
  <node id="47680" label="0100010010" cy:nodeId="15256">
    <graphics z="0.0" y="983.9954904029652" x="337.079452507248"/>
  </node>
  <node id="47679" label="0100010001" cy:nodeId="15257">
    <graphics z="0.0" y="1699.9191964576526" x="995.7942047045136"/>
  </node>
  <node id="47678" label="0100010000" cy:nodeId="15258">
    <graphics z="0.0" y="1541.2778390357776" x="1083.8942413256073"/>
  </node>
  <node id="47677" label="1101010000" cy:nodeId="15259">
    <graphics z="0.0" y="407.8573068092152" x="1929.8390655443573"/>
  </node>
  <node id="47676" label="1100011000" cy:nodeId="15260">
    <graphics z="0.0" y="754.9182809303089" x="626.7876129076386"/>
  </node>
  <node id="47675" label="1100010010" cy:nodeId="15261">
    <graphics z="0.0" y="832.6379464576527" x="198.23388671134956"/>
  </node>
  <node id="47674" label="1100010001" cy:nodeId="15262">
    <graphics z="0.0" y="1632.92639860609" x="877.4656524584199"/>
  </node>
  <node id="47673" label="1100010000" cy:nodeId="15263">
    <graphics z="0.0" y="1513.3044503639026" x="990.1615142748261"/>
  </node>
  <node id="47672" label="0101110000" cy:nodeId="15264">
    <graphics z="0.0" y="623.977149338512" x="1476.6309356615448"/>
  </node>
  <node id="47671" label="0101100001" cy:nodeId="15265">
    <graphics z="0.0" y="909.7558663795277" x="508.71440123771674"/>
  </node>
  <node id="47670" label="1101110000" cy:nodeId="15266">
    <graphics z="0.0" y="555.0755685279652" x="1396.0252227709198"/>
  </node>
  <node id="47669" label="1101100001" cy:nodeId="15267">
    <graphics z="0.0" y="845.9221871803089" x="451.4065093920136"/>
  </node>
  <node id="47668" label="0001010000" cy:nodeId="15268">
    <graphics z="0.0" y="1048.669806809215" x="1875.4584503099823"/>
  </node>
  <node id="47667" label="0000011000" cy:nodeId="15269">
    <graphics z="0.0" y="1304.57141813734" x="701.8833770677949"/>
  </node>
  <node id="47666" label="0000010010" cy:nodeId="15270">
    <graphics z="0.0" y="1481.0568917701526" x="212.83430480216987"/>
  </node>
  <node id="47665" label="0000010001" cy:nodeId="15271">
    <graphics z="0.0" y="2093.42151579359" x="864.3531036302949"/>
  </node>
  <node id="47664" label="0000010000" cy:nodeId="15272">
    <graphics z="0.0" y="1952.00501188734" x="975.9595489427949"/>
  </node>
  <node id="47663" label="1001010000" cy:nodeId="15273">
    <graphics z="0.0" y="930.1513131568714" x="1839.9290313646698"/>
  </node>
  <node id="47662" label="1000011000" cy:nodeId="15274">
    <graphics z="0.0" y="1253.177131027965" x="612.8546905443574"/>
  </node>
  <node id="47661" label="1000010010" cy:nodeId="15275">
    <graphics z="0.0" y="1398.377326340465" x="110.1433830187226"/>
  </node>
  <node id="47660" label="1000010001" cy:nodeId="15276">
    <graphics z="0.0" y="2027.217658371715" x="740.6925201342011"/>
  </node>
  <node id="47659" label="1000010000" cy:nodeId="15277">
    <graphics z="0.0" y="1892.38001188734" x="859.1140899584199"/>
  </node>
  <node id="47658" label="1011100000" cy:nodeId="15278">
    <graphics z="0.0" y="823.4249337623402" x="982.4167632982636"/>
  </node>
  <node id="47657" label="1001110000" cy:nodeId="15279">
    <graphics z="0.0" y="983.0888131568714" x="1328.1612090990448"/>
  </node>
  <node id="47656" label="1001100001" cy:nodeId="15280">
    <graphics z="0.0" y="1221.0146554420276" x="492.2955474779511"/>
  </node>
  <node id="47655" label="0011100000" cy:nodeId="15281">
    <graphics z="0.0" y="967.5056832740589" x="1025.3606109545135"/>
  </node>
  <node id="47654" label="0001110000" cy:nodeId="15282">
    <graphics z="0.0" y="1082.0175240943713" x="1412.2908477709198"/>
  </node>
  <node id="47653" label="0001100001" cy:nodeId="15283">
    <graphics z="0.0" y="1372.816291184215" x="447.30683898185737"/>
  </node>
  <node id="47652" label="0110110000" cy:nodeId="15284">
    <graphics z="0.0" y="1411.35999235609" x="937.3144073412324"/>
  </node>
  <node id="47651" label="0110100001" cy:nodeId="15285">
    <graphics z="0.0" y="1687.65930876234" x="-172.19450379158013"/>
  </node>
  <node id="47650" label="0110100000" cy:nodeId="15286">
    <graphics z="0.0" y="1623.19495329359" x="-66.86116028572076"/>
  </node>
  <node id="47649" label="1110110000" cy:nodeId="15287">
    <graphics z="0.0" y="1312.24719938734" x="833.1789092943574"/>
  </node>
  <node id="47648" label="1110100001" cy:nodeId="15288">
    <graphics z="0.0" y="1655.1113351295276" x="-276.3615570142364"/>
  </node>
  <node id="47647" label="1110100000" cy:nodeId="15289">
    <graphics z="0.0" y="1564.98450407484" x="-165.23745728279107"/>
  </node>
  <node id="47646" label="1010110000" cy:nodeId="15290">
    <graphics z="0.0" y="1663.166877121715" x="719.5739898607636"/>
  </node>
  <node id="47645" label="1010100001" cy:nodeId="15291">
    <graphics z="0.0" y="1925.560920090465" x="-350.88188172126763"/>
  </node>
  <node id="47644" label="0010110000" cy:nodeId="15292">
    <graphics z="0.0" y="1757.3422921607776" x="812.6631011888886"/>
  </node>
  <node id="47643" label="0010100001" cy:nodeId="15293">
    <graphics z="0.0" y="2049.8693917701526" x="-258.57499695564263"/>
  </node>
  <node id="47642" label="1100110000" cy:nodeId="15294">
    <graphics z="0.0" y="1578.9377511451526" x="277.90756224845893"/>
  </node>
  <node id="47641" label="1100100001" cy:nodeId="15295">
    <graphics z="0.0" y="1859.780646652965" x="-779.6748504712676"/>
  </node>
  <node id="47640" label="0100110000" cy:nodeId="15296">
    <graphics z="0.0" y="1649.95520719984" x="368.31196593498237"/>
  </node>
  <node id="47639" label="0100100001" cy:nodeId="15297">
    <graphics z="0.0" y="1888.1567452857776" x="-621.4962616040801"/>
  </node>
  <node id="47638" label="0100100000" cy:nodeId="15298">
    <graphics z="0.0" y="1815.0134347389026" x="-521.3384246900176"/>
  </node>
  <node id="47637" label="0010100000" cy:nodeId="15299">
    <graphics z="0.0" y="1945.953986496715" x="-146.5507965161895"/>
  </node>
  <node id="47636" label="0001100000" cy:nodeId="15300">
    <graphics z="0.0" y="1296.8127511451526" x="506.0467681810761"/>
  </node>
  <node id="47635" label="0000110000" cy:nodeId="15301">
    <graphics z="0.0" y="2069.921271652965" x="361.24613951896674"/>
  </node>
  <node id="47634" label="0000100001" cy:nodeId="15302">
    <graphics z="0.0" y="2220.48938688734" x="-593.1732025220489"/>
  </node>
  <node id="47633" label="0000100000" cy:nodeId="15303">
    <graphics z="0.0" y="2124.7866280982776" x="-493.1342620923614"/>
  </node>
  <node id="47632" label="1100100000" cy:nodeId="15304">
    <graphics z="0.0" y="1762.8151925514026" x="-673.6867523267364"/>
  </node>
  <node id="47631" label="1010100000" cy:nodeId="15305">
    <graphics z="0.0" y="1855.074591965465" x="-244.7990875318145"/>
  </node>
  <node id="47630" label="1001100000" cy:nodeId="15306">
    <graphics z="0.0" y="1099.2741769264026" x="538.2727813646699"/>
  </node>
  <node id="47629" label="1000110000" cy:nodeId="15307">
    <graphics z="0.0" y="1964.142463059215" x="219.88429259513862"/>
  </node>
  <node id="47628" label="1000100001" cy:nodeId="15308">
    <graphics z="0.0" y="2114.4731515357776" x="-747.8072357251739"/>
  </node>
  <node id="47627" label="1000100000" cy:nodeId="15309">
    <graphics z="0.0" y="2036.76966032484" x="-625.0488128736114"/>
  </node>
  <node id="47626" label="0111100000" cy:nodeId="15310">
    <graphics z="0.0" y="557.3093026588245" x="1027.2693023607635"/>
  </node>
  <node id="47625" label="0111000010" cy:nodeId="15311">
    <graphics z="0.0" y="-453.0585867454723" x="931.9394683763886"/>
  </node>
  <node id="47624" label="0111000001" cy:nodeId="15312">
    <graphics z="0.0" y="535.0064156959339" x="1600.8476104662323"/>
  </node>
  <node id="47623" label="0111000000" cy:nodeId="15313">
    <graphics z="0.0" y="441.6491158912464" x="1646.3450469896698"/>
  </node>
  <node id="47622" label="1111100000" cy:nodeId="15314">
    <graphics z="0.0" y="485.90415129163705" x="1000.7794952318574"/>
  </node>
  <node id="47621" label="1111000010" cy:nodeId="15315">
    <graphics z="0.0" y="-536.4392019798473" x="763.4556426927949"/>
  </node>
  <node id="47620" label="1111000001" cy:nodeId="15316">
    <graphics z="0.0" y="445.9459603736683" x="1472.8461456224823"/>
  </node>
  <node id="47619" label="1111000000" cy:nodeId="15317">
    <graphics z="0.0" y="307.6529458473011" x="1501.3361358568573"/>
  </node>
  <node id="47618" label="1011000010" cy:nodeId="15318">
    <graphics z="0.0" y="8.463988632945643" x="729.7464141771699"/>
  </node>
  <node id="47617" label="1011000001" cy:nodeId="15319">
    <graphics z="0.0" y="905.6038888404652" x="1441.0989532396698"/>
  </node>
  <node id="47616" label="1011000000" cy:nodeId="15320">
    <graphics z="0.0" y="734.4099801490589" x="1512.7838897631073"/>
  </node>
  <node id="47615" label="0011000010" cy:nodeId="15321">
    <graphics z="0.0" y="111.16364416578256" x="839.3302154467011"/>
  </node>
  <node id="47614" label="0011000001" cy:nodeId="15322">
    <graphics z="0.0" y="1017.0173409889027" x="1540.9268340990448"/>
  </node>
  <node id="47613" label="0011000000" cy:nodeId="15323">
    <graphics z="0.0" y="888.7546456764027" x="1552.1162872240448"/>
  </node>
  <node id="47612" label="0101100000" cy:nodeId="15324">
    <graphics z="0.0" y="798.0950387428089" x="570.1747894213105"/>
  </node>
  <node id="47611" label="0101000010" cy:nodeId="15325">
    <graphics z="0.0" y="-192.70803132555045" x="418.40373229240424"/>
  </node>
  <node id="47610" label="0101000001" cy:nodeId="15326">
    <graphics z="0.0" y="842.7272408912464" x="1221.9583282396698"/>
  </node>
  <node id="47609" label="1101100000" cy:nodeId="15327">
    <graphics z="0.0" y="752.6309274146839" x="461.96015929435737"/>
  </node>
  <node id="47608" label="1101000010" cy:nodeId="15328">
    <graphics z="0.0" y="-197.76332917711295" x="310.5183715746308"/>
  </node>
  <node id="47607" label="1101000001" cy:nodeId="15329">
    <graphics z="0.0" y="766.4558785865589" x="1103.3660430834198"/>
  </node>
  <node id="47606" label="0001000010" cy:nodeId="15330">
    <graphics z="0.0" y="464.1367562721058" x="362.5269927904511"/>
  </node>
  <node id="47605" label="0001000001" cy:nodeId="15331">
    <graphics z="0.0" y="1369.6347726295276" x="1102.4942169115448"/>
  </node>
  <node id="47604" label="1001000010" cy:nodeId="15332">
    <graphics z="0.0" y="366.13164457776986" x="342.72114562248237"/>
  </node>
  <node id="47603" label="1001000001" cy:nodeId="15333">
    <graphics z="0.0" y="1261.2932198951526" x="1003.2289581224824"/>
  </node>
  <node id="47602" label="0110000010" cy:nodeId="15334">
    <graphics z="0.0" y="787.1194528053089" x="-197.69953919197076"/>
  </node>
  <node id="47601" label="0110000001" cy:nodeId="15335">
    <graphics z="0.0" y="1624.95032438734" x="518.0597991869355"/>
  </node>
  <node id="47600" label="0110000000" cy:nodeId="15336">
    <graphics z="0.0" y="1561.1980050514026" x="629.8119048998261"/>
  </node>
  <node id="47599" label="1110000010" cy:nodeId="15337">
    <graphics z="0.0" y="645.7528756568714" x="-335.4732513501739"/>
  </node>
  <node id="47598" label="1110000001" cy:nodeId="15338">
    <graphics z="0.0" y="1540.5058663795276" x="415.5402679369355"/>
  </node>
  <node id="47597" label="0010000010" cy:nodeId="15339">
    <graphics z="0.0" y="1194.90393766859" x="-298.362442024002"/>
  </node>
  <node id="47596" label="0010000001" cy:nodeId="15340">
    <graphics z="0.0" y="1990.507209152965" x="490.7126312181855"/>
  </node>
  <node id="47595" label="0010000000" cy:nodeId="15341">
    <graphics z="0.0" y="1887.3071359107776" x="536.8490753099824"/>
  </node>
  <node id="47594" label="1110000000" cy:nodeId="15342">
    <graphics z="0.0" y="1455.7924874732776" x="521.5344695970917"/>
  </node>
  <node id="47593" label="1010000010" cy:nodeId="15343">
    <graphics z="0.0" y="1149.3745187232776" x="-410.60273743415826"/>
  </node>
  <node id="47592" label="1010000001" cy:nodeId="15344">
    <graphics z="0.0" y="1876.0795968482776" x="366.61164855216987"/>
  </node>
  <node id="47591" label="1010000000" cy:nodeId="15345">
    <graphics z="0.0" y="1778.66809782484" x="459.56120299552924"/>
  </node>
  <node id="47590" label="1101000000" cy:nodeId="15346">
    <graphics z="0.0" y="674.7800973365589" x="1099.647109977951"/>
  </node>
  <node id="47589" label="1100000010" cy:nodeId="15347">
    <graphics z="0.0" y="977.1960519264027" x="-820.6976776197051"/>
  </node>
  <node id="47588" label="1100000001" cy:nodeId="15348">
    <graphics z="0.0" y="1814.2124093482776" x="-95.59965515876763"/>
  </node>
  <node id="47587" label="0101000000" cy:nodeId="15349">
    <graphics z="0.0" y="741.9199899146839" x="1230.8269805834198"/>
  </node>
  <node id="47586" label="0100000010" cy:nodeId="15350">
    <graphics z="0.0" y="1084.83460173109" x="-732.1717987134551"/>
  </node>
  <node id="47585" label="0100000001" cy:nodeId="15351">
    <graphics z="0.0" y="1843.0136788795276" x="57.73560523246772"/>
  </node>
  <node id="47584" label="0100000000" cy:nodeId="15352">
    <graphics z="0.0" y="1802.85462126234" x="153.4332656786347"/>
  </node>
  <node id="47583" label="1100000000" cy:nodeId="15353">
    <graphics z="0.0" y="1717.81360563734" x="27.21133422111518"/>
  </node>
  <node id="47582" label="1001000000" cy:nodeId="15354">
    <graphics z="0.0" y="1122.8046945045276" x="1143.1496124193573"/>
  </node>
  <node id="47581" label="1000000010" cy:nodeId="15355">
    <graphics z="0.0" y="1496.084845871715" x="-888.6020355298614"/>
  </node>
  <node id="47580" label="1000000001" cy:nodeId="15356">
    <graphics z="0.0" y="2173.98352751234" x="-147.93685913825982"/>
  </node>
  <node id="47579" label="1000000000" cy:nodeId="15357">
    <graphics z="0.0" y="2020.4211495826526" x="-32.407295234451226"/>
  </node>
  <node id="47578" label="0001000000" cy:nodeId="15358">
    <graphics z="0.0" y="1235.2963937232776" x="1142.8390655443573"/>
  </node>
  <node id="47577" label="0000000010" cy:nodeId="15359">
    <graphics z="0.0" y="1605.0949777076526" x="-793.0007782056426"/>
  </node>
  <node id="47576" label="0000000001" cy:nodeId="15360">
    <graphics z="0.0" y="2257.40589079359" x="5.696121208419868"/>
  </node>
  <node id="47575" label="0000000000" cy:nodeId="15361">
    <graphics z="0.0" y="2099.864142746715" x="49.258422844162055"/>
  </node>
</graph>
