# Supplementary material
Source: publisher figshare collection journal article supplement (https://springernature.figshare.com/ndownloader/files/17562821)
Supplement: Supplementary file 1 [file 17562821 › CytoscapeSession-2018_09_25-21_15/views/21522-54743-STG%2C+Model+3.xgmml]

<?xml version="1.0" encoding="UTF-8" standalone="yes"?>
<graph id="54743" label="STG, Model 3" cy:view="1" cy:networkId="21522" cy:visualStyle="Directed" cy:rendererId="org.cytoscape.ding" cy:documentVersion="3.0" xmlns:dc="http://purl.org/dc/elements/1.1/" xmlns:xlink="http://www.w3.org/1999/xlink" xmlns:rdf="http://www.w3.org/1999/02/22-rdf-syntax-ns#" xmlns:cy="http://www.cytoscape.org" xmlns="http://www.cs.rpi.edu/XGMML">
  <graphics>
    <att name="NETWORK_TITLE" value="STG, Model 3" type="string" cy:type="String"/>
    <att name="NETWORK_EDGE_SELECTION" value="true" type="string" cy:type="String"/>
    <att name="NETWORK_WIDTH" value="1193.0" type="string" cy:type="String"/>
    <att name="NETWORK_NODE_SELECTION" value="true" type="string" cy:type="String"/>
    <att name="NETWORK_CENTER_Z_LOCATION" value="0.0" type="string" cy:type="String"/>
    <att name="NETWORK_CENTER_X_LOCATION" value="20.314453125" type="string" cy:type="String"/>
    <att name="NETWORK_SCALE_FACTOR" value="0.4238213420837292" type="string" cy:type="String"/>
    <att name="NETWORK_DEPTH" value="0.0" type="string" cy:type="String"/>
    <att name="NETWORK_HEIGHT" value="501.0" type="string" cy:type="String"/>
    <att name="NETWORK_CENTER_Y_LOCATION" value="9.61566162109375" type="string" cy:type="String"/>
  </graphics>
  <node id="54789" label="0010100000" cy:nodeId="22511">
    <graphics z="0.0" y="-343.63688328291755" x="-685.0687484256923"/>
  </node>
  <node id="54788" label="0001100000" cy:nodeId="22512">
    <graphics z="0.0" y="-75.95286991621833" x="-420.7309607975185"/>
  </node>
  <node id="54787" label="0000110000" cy:nodeId="22513">
    <graphics z="0.0" y="-98.78909733321052" x="-765.4232406131923"/>
  </node>
  <node id="54786" label="0000100000" cy:nodeId="22514">
    <graphics z="0.0" y="-244.22125294234138" x="-693.114067029208"/>
  </node>
  <node id="54785" label="1100100000" cy:nodeId="22515">
    <graphics z="0.0" y="-26.59146549727302" x="-1486.9766921512783"/>
  </node>
  <node id="54784" label="1010100000" cy:nodeId="22516">
    <graphics z="0.0" y="-238.86223270918708" x="-1584.7924422733486"/>
  </node>
  <node id="54783" label="1001100000" cy:nodeId="22517">
    <graphics z="0.0" y="-223.16714909102302" x="-1434.8418044559658"/>
  </node>
  <node id="54782" label="1000110000" cy:nodeId="22518">
    <graphics z="0.0" y="-187.8741040470777" x="-1582.6478347294033"/>
  </node>
  <node id="54781" label="1000100000" cy:nodeId="22519">
    <graphics z="0.0" y="-212.56622746016365" x="-1478.369956921786"/>
  </node>
  <node id="54780" label="0111100000" cy:nodeId="22520">
    <graphics z="0.0" y="-193.48715641524177" x="-507.7338447086513"/>
  </node>
  <node id="54779" label="0111000010" cy:nodeId="22521">
    <graphics z="0.0" y="-167.3509907963453" x="-235.06304163858294"/>
  </node>
  <node id="54778" label="0111000000" cy:nodeId="22522">
    <graphics z="0.0" y="-227.6976361515699" x="-303.93454737588763"/>
  </node>
  <node id="54777" label="1111100000" cy:nodeId="22523">
    <graphics z="0.0" y="-27.738422894733958" x="-1267.1596679203212"/>
  </node>
  <node id="54776" label="1111000010" cy:nodeId="22524">
    <graphics z="0.0" y="394.6015581843676" x="-1373.0879725925624"/>
  </node>
  <node id="54775" label="0011000010" cy:nodeId="22525">
    <graphics z="0.0" y="-226.22589161421638" x="-327.64681239053607"/>
  </node>
  <node id="54774" label="0011000000" cy:nodeId="22526">
    <graphics z="0.0" y="-254.18553211714607" x="-437.25828928872943"/>
  </node>
  <node id="54773" label="1111000000" cy:nodeId="22527">
    <graphics z="0.0" y="115.70298335526604" x="-1426.5832290165126"/>
  </node>
  <node id="54772" label="1011000010" cy:nodeId="22528">
    <graphics z="0.0" y="317.28338191483635" x="-1537.8082656376064"/>
  </node>
  <node id="54771" label="1011000000" cy:nodeId="22529">
    <graphics z="0.0" y="168.9121050593676" x="-1490.2579879276454"/>
  </node>
  <node id="54770" label="0101100000" cy:nodeId="22530">
    <graphics z="0.0" y="-3.0321088078198954" x="-428.6764373295009"/>
  </node>
  <node id="54769" label="0101000010" cy:nodeId="22531">
    <graphics z="0.0" y="103.20843074296135" x="-161.07109827920794"/>
  </node>
  <node id="54768" label="1101100000" cy:nodeId="22532">
    <graphics z="0.0" y="-238.3566937687574" x="-1299.011558484286"/>
  </node>
  <node id="54767" label="1101000010" cy:nodeId="22533">
    <graphics z="0.0" y="135.04905269120354" x="-1384.2732924930751"/>
  </node>
  <node id="54766" label="1001000010" cy:nodeId="22534">
    <graphics z="0.0" y="168.99293086503167" x="-1598.8816298954189"/>
  </node>
  <node id="54765" label="0001000010" cy:nodeId="22535">
    <graphics z="0.0" y="-60.68547489668708" x="-249.1310958378017"/>
  </node>
  <node id="54764" label="0110000010" cy:nodeId="22536">
    <graphics z="0.0" y="-124.58121159102302" x="-450.11041636392474"/>
  </node>
  <node id="54763" label="0110000000" cy:nodeId="22537">
    <graphics z="0.0" y="-124.32152988936286" x="-573.1779937259853"/>
  </node>
  <node id="54762" label="1110000010" cy:nodeId="22538">
    <graphics z="0.0" y="68.33083674882073" x="-1584.7055129520595"/>
  </node>
  <node id="54761" label="0010000010" cy:nodeId="22539">
    <graphics z="0.0" y="-319.94406559492927" x="-438.25302500650287"/>
  </node>
  <node id="54760" label="0010000000" cy:nodeId="22540">
    <graphics z="0.0" y="-259.78183224226814" x="-529.8108138553798"/>
  </node>
  <node id="54759" label="1110000000" cy:nodeId="22541">
    <graphics z="0.0" y="22.2866396663012" x="-1541.709281872958"/>
  </node>
  <node id="54758" label="1010000010" cy:nodeId="22542">
    <graphics z="0.0" y="183.44158503983635" x="-1694.2594527713954"/>
  </node>
  <node id="54757" label="1010000000" cy:nodeId="22543">
    <graphics z="0.0" y="56.12785670731682" x="-1627.077720593661"/>
  </node>
  <node id="54756" label="0101000000" cy:nodeId="22544">
    <graphics z="0.0" y="120.86745784257073" x="-354.6611709110439"/>
  </node>
  <node id="54755" label="0100000010" cy:nodeId="22545">
    <graphics z="0.0" y="17.877315020305105" x="-307.76743311807513"/>
  </node>
  <node id="54754" label="0100000000" cy:nodeId="22546">
    <graphics z="0.0" y="81.68862483475823" x="-498.10018725320697"/>
  </node>
  <node id="54753" label="1101000000" cy:nodeId="22547">
    <graphics z="0.0" y="-53.60467388655525" x="-1511.3309096805751"/>
  </node>
  <node id="54752" label="1100000010" cy:nodeId="22548">
    <graphics z="0.0" y="38.52078578446526" x="-1508.824287366122"/>
  </node>
  <node id="54751" label="1100000000" cy:nodeId="22549">
    <graphics z="0.0" y="-81.72630932356697" x="-1694.664390515536"/>
  </node>
  <node id="54750" label="1001000000" cy:nodeId="22550">
    <graphics z="0.0" y="69.39380977128167" x="-1585.2918929569423"/>
  </node>
  <node id="54749" label="1000000010" cy:nodeId="22551">
    <graphics z="0.0" y="94.8571734187426" x="-1705.520805310458"/>
  </node>
  <node id="54748" label="1000000000" cy:nodeId="22552">
    <graphics z="0.0" y="-110.71988346602302" x="-1706.436820935458"/>
  </node>
  <node id="54747" label="0001000000" cy:nodeId="22553">
    <graphics z="0.0" y="-172.5059170963941" x="-335.87337489053607"/>
  </node>
  <node id="54746" label="0000000010" cy:nodeId="22554">
    <graphics z="0.0" y="-202.2346291783033" x="-449.27998919412494"/>
  </node>
  <node id="54745" label="0000000000" cy:nodeId="22555">
    <graphics z="0.0" y="-34.938114667194895" x="-623.4422530643642"/>
  </node>
  <node id="55768" label="0111111111" cy:nodeId="21532">
    <graphics z="0.0" y="-167.0809369328199" x="302.663993883878"/>
  </node>
  <node id="55767" label="1111111111" cy:nodeId="21533">
    <graphics z="0.0" y="325.30437800858635" x="1479.1878738887608"/>
  </node>
  <node id="55766" label="0011111111" cy:nodeId="21534">
    <graphics z="0.0" y="-44.81680729414802" x="408.7814331538975"/>
  </node>
  <node id="55765" label="1011111111" cy:nodeId="21535">
    <graphics z="0.0" y="126.58454463456292" x="1566.0367508418858"/>
  </node>
  <node id="55764" label="0101111111" cy:nodeId="21536">
    <graphics z="0.0" y="-191.4130902531324" x="210.69098668172956"/>
  </node>
  <node id="55763" label="1101111111" cy:nodeId="21537">
    <graphics z="0.0" y="226.9488482234301" x="1247.2884674556553"/>
  </node>
  <node id="55762" label="0001111111" cy:nodeId="21538">
    <graphics z="0.0" y="-150.63959171797615" x="421.81238179281354"/>
  </node>
  <node id="55761" label="1001111111" cy:nodeId="21539">
    <graphics z="0.0" y="60.93397090409417" x="1377.027504015714"/>
  </node>
  <node id="55760" label="0110111111" cy:nodeId="21540">
    <graphics z="0.0" y="-107.15715458418708" x="605.1427231319249"/>
  </node>
  <node id="55759" label="1110111111" cy:nodeId="21541">
    <graphics z="0.0" y="192.0125689265551" x="1339.2464218623936"/>
  </node>
  <node id="55758" label="0010111111" cy:nodeId="21542">
    <graphics z="0.0" y="-105.0105023625074" x="555.1988144405186"/>
  </node>
  <node id="55757" label="1010111111" cy:nodeId="21543">
    <graphics z="0.0" y="-32.10200169112068" x="1463.1597977168858"/>
  </node>
  <node id="55756" label="0100111111" cy:nodeId="21544">
    <graphics z="0.0" y="-220.74045231367927" x="420.02114682272077"/>
  </node>
  <node id="55755" label="1100111111" cy:nodeId="21545">
    <graphics z="0.0" y="175.79803035233635" x="1133.8278732784092"/>
  </node>
  <node id="55754" label="1000111111" cy:nodeId="21546">
    <graphics z="0.0" y="-46.703400159138255" x="1273.3337250240147"/>
  </node>
  <node id="55753" label="0000111111" cy:nodeId="21547">
    <graphics z="0.0" y="-161.2731976750074" x="504.76369862630963"/>
  </node>
  <node id="55752" label="0111111011" cy:nodeId="21548">
    <graphics z="0.0" y="3.326823687297292" x="356.9458542354405"/>
  </node>
  <node id="55751" label="0111101111" cy:nodeId="21549">
    <graphics z="0.0" y="22.05135676835198" x="210.69797520712018"/>
  </node>
  <node id="55750" label="1111111011" cy:nodeId="21550">
    <graphics z="0.0" y="135.77474544022698" x="1485.795845080167"/>
  </node>
  <node id="55749" label="1111101111" cy:nodeId="21551">
    <graphics z="0.0" y="214.65740535233635" x="1550.552436877042"/>
  </node>
  <node id="55748" label="1011111011" cy:nodeId="21552">
    <graphics z="0.0" y="-168.57674839522224" x="1608.966713000089"/>
  </node>
  <node id="55747" label="1011101111" cy:nodeId="21553">
    <graphics z="0.0" y="50.327266192180105" x="1683.8911209590733"/>
  </node>
  <node id="55746" label="0011111011" cy:nodeId="21554">
    <graphics z="0.0" y="73.11224505875725" x="608.5679245479405"/>
  </node>
  <node id="55745" label="0011101111" cy:nodeId="21555">
    <graphics z="0.0" y="8.529658770305105" x="393.19203190878034"/>
  </node>
  <node id="55744" label="0101111011" cy:nodeId="21556">
    <graphics z="0.0" y="-197.1949506046949" x="324.6911163814366"/>
  </node>
  <node id="55743" label="0101101111" cy:nodeId="21557">
    <graphics z="0.0" y="-72.54051640059333" x="158.29901890829206"/>
  </node>
  <node id="55742" label="1101111011" cy:nodeId="21558">
    <graphics z="0.0" y="196.2263140437426" x="1279.5325298793614"/>
  </node>
  <node id="55741" label="1101101111" cy:nodeId="21559">
    <graphics z="0.0" y="209.4503130671801" x="1452.0660477168858"/>
  </node>
  <node id="55740" label="1011101011" cy:nodeId="21560">
    <graphics z="0.0" y="-213.8057675602613" x="1663.9234390743077"/>
  </node>
  <node id="55739" label="1001111011" cy:nodeId="21561">
    <graphics z="0.0" y="-46.304405713337474" x="1496.110527087003"/>
  </node>
  <node id="55738" label="1001101111" cy:nodeId="21562">
    <graphics z="0.0" y="-16.28390934492927" x="1377.2417145259678"/>
  </node>
  <node id="55737" label="0011101011" cy:nodeId="21563">
    <graphics z="0.0" y="204.21534297440667" x="550.2187042720616"/>
  </node>
  <node id="55736" label="0001111011" cy:nodeId="21564">
    <graphics z="0.0" y="-188.8785443546949" x="452.6960745342076"/>
  </node>
  <node id="55735" label="0001101111" cy:nodeId="21565">
    <graphics z="0.0" y="-65.73326542403083" x="358.6262054927647"/>
  </node>
  <node id="55734" label="1111011111" cy:nodeId="21566">
    <graphics z="0.0" y="317.9932818171801" x="1522.3421249873936"/>
  </node>
  <node id="55733" label="0111011111" cy:nodeId="21567">
    <graphics z="0.0" y="-130.02386906172615" x="312.8645859248936"/>
  </node>
  <node id="55732" label="1011011111" cy:nodeId="21568">
    <graphics z="0.0" y="52.719600176555105" x="1614.8303299434483"/>
  </node>
  <node id="55731" label="0011011111" cy:nodeId="21569">
    <graphics z="0.0" y="116.75657985184807" x="392.3139267452061"/>
  </node>
  <node id="55730" label="0110111011" cy:nodeId="21570">
    <graphics z="0.0" y="-85.7929730656324" x="515.8007736690342"/>
  </node>
  <node id="55729" label="0110101111" cy:nodeId="21571">
    <graphics z="0.0" y="100.14937541459221" x="498.8881912715733"/>
  </node>
  <node id="55728" label="1110111011" cy:nodeId="21572">
    <graphics z="0.0" y="44.06325862382073" x="1178.4887848384678"/>
  </node>
  <node id="55727" label="1110101111" cy:nodeId="21573">
    <graphics z="0.0" y="47.27834651444573" x="1323.5892258174717"/>
  </node>
  <node id="55726" label="1010111011" cy:nodeId="21574">
    <graphics z="0.0" y="51.08602473710198" x="1241.7564831264317"/>
  </node>
  <node id="55725" label="1010101111" cy:nodeId="21575">
    <graphics z="0.0" y="-100.50053074385505" x="1386.6274796016514"/>
  </node>
  <node id="55724" label="0010111011" cy:nodeId="21576">
    <graphics z="0.0" y="-54.14525272871833" x="776.2591934688389"/>
  </node>
  <node id="55723" label="0010101111" cy:nodeId="21577">
    <graphics z="0.0" y="152.4449877497973" x="628.1642990596592"/>
  </node>
  <node id="55722" label="0101011111" cy:nodeId="21578">
    <graphics z="0.0" y="-121.19611027266365" x="49.696601916104555"/>
  </node>
  <node id="55721" label="1101011111" cy:nodeId="21579">
    <graphics z="0.0" y="305.1829790828051" x="1448.4889145381749"/>
  </node>
  <node id="55720" label="0111110111" cy:nodeId="21580">
    <graphics z="0.0" y="-79.14268925215583" x="426.75526051595807"/>
  </node>
  <node id="55719" label="1111110111" cy:nodeId="21581">
    <graphics z="0.0" y="323.436366533977" x="1364.7356033809483"/>
  </node>
  <node id="55718" label="1001011111" cy:nodeId="21582">
    <graphics z="0.0" y="200.92507503007073" x="1562.6098404414952"/>
  </node>
  <node id="55717" label="0001011111" cy:nodeId="21583">
    <graphics z="0.0" y="-126.46771671797615" x="200.67824559286237"/>
  </node>
  <node id="55716" label="0011110111" cy:nodeId="21584">
    <graphics z="0.0" y="197.90638301346917" x="381.6073761470616"/>
  </node>
  <node id="55715" label="1011110111" cy:nodeId="21585">
    <graphics z="0.0" y="131.42914912675042" x="1413.3601303584874"/>
  </node>
  <node id="55714" label="0110101011" cy:nodeId="21586">
    <graphics z="0.0" y="58.312285876017995" x="534.5225143916905"/>
  </node>
  <node id="55713" label="0100111011" cy:nodeId="21587">
    <graphics z="0.0" y="-166.79156925703865" x="415.59710316732526"/>
  </node>
  <node id="55712" label="0100101111" cy:nodeId="21588">
    <graphics z="0.0" y="-7.641003155964427" x="282.39061741903424"/>
  </node>
  <node id="55711" label="0100101011" cy:nodeId="21589">
    <graphics z="0.0" y="-79.2933392765699" x="411.17376332357526"/>
  </node>
  <node id="55710" label="1110101011" cy:nodeId="21590">
    <graphics z="0.0" y="160.44158503983635" x="1329.694583941251"/>
  </node>
  <node id="55709" label="1100111011" cy:nodeId="21591">
    <graphics z="0.0" y="-51.765846753376536" x="1235.317184496671"/>
  </node>
  <node id="55708" label="1100101111" cy:nodeId="21592">
    <graphics z="0.0" y="93.57239863846917" x="1299.8690014369786"/>
  </node>
  <node id="55707" label="1100101011" cy:nodeId="21593">
    <graphics z="0.0" y="151.4756273982348" x="1178.57452397421"/>
  </node>
  <node id="55706" label="1010101011" cy:nodeId="21594">
    <graphics z="0.0" y="-165.36054661299568" x="1482.1210556514561"/>
  </node>
  <node id="55705" label="1001101011" cy:nodeId="21595">
    <graphics z="0.0" y="-184.92129948164802" x="1523.9953690059483"/>
  </node>
  <node id="55704" label="1000111011" cy:nodeId="21596">
    <graphics z="0.0" y="-91.8965993168531" x="1427.7753830440342"/>
  </node>
  <node id="55703" label="1000101111" cy:nodeId="21597">
    <graphics z="0.0" y="-256.62521793867927" x="1332.5520096309483"/>
  </node>
  <node id="55702" label="1000101011" cy:nodeId="21598">
    <graphics z="0.0" y="-228.5861401798902" x="1286.221122790128"/>
  </node>
  <node id="55701" label="0010101011" cy:nodeId="21599">
    <graphics z="0.0" y="140.50204036210198" x="664.3097153194249"/>
  </node>
  <node id="55700" label="0001101011" cy:nodeId="21600">
    <graphics z="0.0" y="-110.81001713301521" x="503.99983601644635"/>
  </node>
  <node id="55699" label="0000111011" cy:nodeId="21601">
    <graphics z="0.0" y="-81.65909245039802" x="604.8360672481358"/>
  </node>
  <node id="55698" label="0000101111" cy:nodeId="21602">
    <graphics z="0.0" y="43.174048876506276" x="374.2423401363194"/>
  </node>
  <node id="55697" label="0000101011" cy:nodeId="21603">
    <graphics z="0.0" y="-13.241947675007395" x="532.9186249263585"/>
  </node>
  <node id="55696" label="0101110111" cy:nodeId="21604">
    <graphics z="0.0" y="-115.75084354903083" x="317.77211766317487"/>
  </node>
  <node id="55695" label="0110011111" cy:nodeId="21605">
    <graphics z="0.0" y="-120.31952335860115" x="418.0122910030186"/>
  </node>
  <node id="55694" label="1101110111" cy:nodeId="21606">
    <graphics z="0.0" y="292.440272783977" x="1172.5572586543858"/>
  </node>
  <node id="55693" label="1110011111" cy:nodeId="21607">
    <graphics z="0.0" y="188.98418757889885" x="1412.1081619746983"/>
  </node>
  <node id="55692" label="0111101011" cy:nodeId="21608">
    <graphics z="0.0" y="78.26966569398064" x="417.6046753413975"/>
  </node>
  <node id="55691" label="0001110111" cy:nodeId="21609">
    <graphics z="0.0" y="126.6717486140551" x="440.84472708776593"/>
  </node>
  <node id="55690" label="1001110111" cy:nodeId="21610">
    <graphics z="0.0" y="223.05483577225823" x="1370.186096239835"/>
  </node>
  <node id="55689" label="1111101011" cy:nodeId="21611">
    <graphics z="0.0" y="24.36471126053948" x="1598.7964859493077"/>
  </node>
  <node id="55688" label="1010011111" cy:nodeId="21612">
    <graphics z="0.0" y="-136.24779179121833" x="1552.592231798917"/>
  </node>
  <node id="55687" label="0010011111" cy:nodeId="21613">
    <graphics z="0.0" y="133.143771624309" x="344.0229568965733"/>
  </node>
  <node id="55686" label="0100011111" cy:nodeId="21614">
    <graphics z="0.0" y="-95.41351749922615" x="198.827079821378"/>
  </node>
  <node id="55685" label="1100011111" cy:nodeId="21615">
    <graphics z="0.0" y="336.020595049602" x="1337.7926941402256"/>
  </node>
  <node id="55684" label="0110110111" cy:nodeId="21616">
    <graphics z="0.0" y="45.548091387492605" x="588.5920181758702"/>
  </node>
  <node id="55683" label="0101101011" cy:nodeId="21617">
    <graphics z="0.0" y="-88.37384464766365" x="313.60228734090924"/>
  </node>
  <node id="55682" label="1110110111" cy:nodeId="21618">
    <graphics z="0.0" y="299.07793757889885" x="1110.0099716670811"/>
  </node>
  <node id="55681" label="1101101011" cy:nodeId="21619">
    <graphics z="0.0" y="52.76020381425042" x="1400.4601974971592"/>
  </node>
  <node id="55680" label="1000011111" cy:nodeId="21620">
    <graphics z="0.0" y="94.29195735428948" x="1446.0957260616124"/>
  </node>
  <node id="55679" label="0000011111" cy:nodeId="21621">
    <graphics z="0.0" y="21.050883745891042" x="401.7480316646397"/>
  </node>
  <node id="55678" label="0010110111" cy:nodeId="21622">
    <graphics z="0.0" y="41.3427920100512" x="690.7983932979405"/>
  </node>
  <node id="55677" label="1010110111" cy:nodeId="21623">
    <graphics z="0.0" y="263.5815386531176" x="1211.839027453214"/>
  </node>
  <node id="55676" label="0100110111" cy:nodeId="21624">
    <graphics z="0.0" y="-91.52452518965583" x="413.6334000118077"/>
  </node>
  <node id="55675" label="1100110111" cy:nodeId="21625">
    <graphics z="0.0" y="210.38528010819573" x="1015.6139145381749"/>
  </node>
  <node id="55674" label="1000110111" cy:nodeId="21626">
    <graphics z="0.0" y="88.92965266678948" x="1152.0344009883702"/>
  </node>
  <node id="55673" label="0000110111" cy:nodeId="21627">
    <graphics z="0.0" y="71.81239364121575" x="569.9525146968663"/>
  </node>
  <node id="55672" label="0111001111" cy:nodeId="21628">
    <graphics z="0.0" y="168.23436305497307" x="204.785087633878"/>
  </node>
  <node id="55671" label="1111001111" cy:nodeId="21629">
    <graphics z="0.0" y="153.11501643632073" x="1623.4148025996983"/>
  </node>
  <node id="55670" label="1011001111" cy:nodeId="21630">
    <graphics z="0.0" y="17.59407374833245" x="1708.1777420528233"/>
  </node>
  <node id="55669" label="0011001111" cy:nodeId="21631">
    <graphics z="0.0" y="171.13727900956292" x="289.3580399043858"/>
  </node>
  <node id="55668" label="0101001111" cy:nodeId="21632">
    <graphics z="0.0" y="38.982757067424245" x="33.39487462118268"/>
  </node>
  <node id="55667" label="1101001111" cy:nodeId="21633">
    <graphics z="0.0" y="265.792323565227" x="1573.3277054317296"/>
  </node>
  <node id="55666" label="0111110011" cy:nodeId="21634">
    <graphics z="0.0" y="28.756572222453542" x="372.33466343954206"/>
  </node>
  <node id="55665" label="0111100111" cy:nodeId="21635">
    <graphics z="0.0" y="-14.81765415694099" x="300.6594315059483"/>
  </node>
  <node id="55664" label="1111110011" cy:nodeId="21636">
    <graphics z="0.0" y="170.3292193171801" x="1295.5908546932042"/>
  </node>
  <node id="55663" label="1111100111" cy:nodeId="21637">
    <graphics z="0.0" y="173.9282183406176" x="1414.930839587003"/>
  </node>
  <node id="55662" label="1001001111" cy:nodeId="21638">
    <graphics z="0.0" y="211.46395442460198" x="1663.942543078214"/>
  </node>
  <node id="55661" label="0001001111" cy:nodeId="21639">
    <graphics z="0.0" y="-70.76146366621833" x="279.37064366415143"/>
  </node>
  <node id="55660" label="1011110011" cy:nodeId="21640">
    <graphics z="0.0" y="82.67458674882073" x="1493.674995470792"/>
  </node>
  <node id="55659" label="1011100111" cy:nodeId="21641">
    <graphics z="0.0" y="4.616656756144948" x="1531.0035477168858"/>
  </node>
  <node id="55658" label="0011110011" cy:nodeId="21642">
    <graphics z="0.0" y="82.72008261654992" x="617.3138199336827"/>
  </node>
  <node id="55657" label="0011100111" cy:nodeId="21643">
    <graphics z="0.0" y="190.79448268387932" x="498.64891820028424"/>
  </node>
  <node id="55656" label="1011101110" cy:nodeId="21644">
    <graphics z="0.0" y="58.58932063553948" x="-1098.5538100712001"/>
  </node>
  <node id="55655" label="0011101110" cy:nodeId="21645">
    <graphics z="0.0" y="-254.0311970951734" x="-474.0777635090053"/>
  </node>
  <node id="55654" label="0111111101" cy:nodeId="21646">
    <graphics z="0.0" y="-193.9416547062574" x="435.1431971080601"/>
  </node>
  <node id="55653" label="1111111101" cy:nodeId="21647">
    <graphics z="0.0" y="175.64113948319573" x="1409.4204788692296"/>
  </node>
  <node id="55652" label="0011111101" cy:nodeId="21648">
    <graphics z="0.0" y="-45.78667118574958" x="656.593452502042"/>
  </node>
  <node id="55651" label="0101110011" cy:nodeId="21649">
    <graphics z="0.0" y="-168.09892704512458" x="303.3144608028233"/>
  </node>
  <node id="55650" label="0101100111" cy:nodeId="21650">
    <graphics z="0.0" y="-10.824162030476145" x="218.7530594356358"/>
  </node>
  <node id="55649" label="0110001111" cy:nodeId="21651">
    <graphics z="0.0" y="210.3920855281176" x="314.5783768184483"/>
  </node>
  <node id="55648" label="1011111101" cy:nodeId="21652">
    <graphics z="0.0" y="-70.26513340498786" x="1406.8486099727452"/>
  </node>
  <node id="55647" label="1101110011" cy:nodeId="21653">
    <graphics z="0.0" y="171.06338069413323" x="1087.6341019161046"/>
  </node>
  <node id="55646" label="1101100111" cy:nodeId="21654">
    <graphics z="0.0" y="287.5228228328051" x="1270.241772223264"/>
  </node>
  <node id="55645" label="1110001111" cy:nodeId="21655">
    <graphics z="0.0" y="72.89654109452385" x="1539.4153519161046"/>
  </node>
  <node id="55644" label="1011100011" cy:nodeId="21656">
    <graphics z="0.0" y="-244.7857251408277" x="1545.5961990840733"/>
  </node>
  <node id="55643" label="1001110011" cy:nodeId="21657">
    <graphics z="0.0" y="12.02487513993401" x="1275.650919009"/>
  </node>
  <node id="55642" label="1001100111" cy:nodeId="21658">
    <graphics z="0.0" y="67.80894038651604" x="1495.1513443477452"/>
  </node>
  <node id="55641" label="0011100011" cy:nodeId="21659">
    <graphics z="0.0" y="261.1689409968676" x="581.6241837032139"/>
  </node>
  <node id="55640" label="0001110011" cy:nodeId="21660">
    <graphics z="0.0" y="-61.96455814864021" x="398.90798192098737"/>
  </node>
  <node id="55639" label="0001100111" cy:nodeId="21661">
    <graphics z="0.0" y="120.7755083796801" x="322.7348251827061"/>
  </node>
  <node id="55638" label="1010001111" cy:nodeId="21662">
    <graphics z="0.0" y="-128.96692707564216" x="1584.7912979610264"/>
  </node>
  <node id="55637" label="0010001111" cy:nodeId="21663">
    <graphics z="0.0" y="233.0455736872973" x="433.35745625570416"/>
  </node>
  <node id="55636" label="1111010111" cy:nodeId="21664">
    <graphics z="0.0" y="349.2550921199145" x="1316.9234505183995"/>
  </node>
  <node id="55635" label="0111010111" cy:nodeId="21665">
    <graphics z="0.0" y="-62.82899906660896" x="241.29154210165143"/>
  </node>
  <node id="55634" label="0011010111" cy:nodeId="21666">
    <graphics z="0.0" y="190.47400996659417" x="342.2236404903233"/>
  </node>
  <node id="55633" label="0101111101" cy:nodeId="21667">
    <graphics z="0.0" y="-352.21600773360115" x="435.28242211416364"/>
  </node>
  <node id="55632" label="1011010111" cy:nodeId="21668">
    <graphics z="0.0" y="238.64919612382073" x="1434.8868637569249"/>
  </node>
  <node id="55631" label="1101111101" cy:nodeId="21669">
    <graphics z="0.0" y="30.472148394328542" x="1234.0440674312413"/>
  </node>
  <node id="55630" label="0001111101" cy:nodeId="21670">
    <graphics z="0.0" y="-206.29471256758552" x="638.3547897823155"/>
  </node>
  <node id="55629" label="0100001111" cy:nodeId="21671">
    <graphics z="0.0" y="61.814767336589284" x="190.10459141805768"/>
  </node>
  <node id="55628" label="1001111101" cy:nodeId="21672">
    <graphics z="0.0" y="106.45600459550042" x="1477.306572008878"/>
  </node>
  <node id="55627" label="1100001111" cy:nodeId="21673">
    <graphics z="0.0" y="159.8336138484301" x="1424.3388290889561"/>
  </node>
  <node id="55626" label="0110110011" cy:nodeId="21674">
    <graphics z="0.0" y="35.4952463862719" x="457.5137882716954"/>
  </node>
  <node id="55625" label="0110100111" cy:nodeId="21675">
    <graphics z="0.0" y="-39.12663700606208" x="466.0988255031407"/>
  </node>
  <node id="55624" label="1110110011" cy:nodeId="21676">
    <graphics z="0.0" y="212.48833796952385" x="1177.5350113399327"/>
  </node>
  <node id="55623" label="1110100111" cy:nodeId="21677">
    <graphics z="0.0" y="112.4682574031176" x="1164.4808121211827"/>
  </node>
  <node id="55622" label="1000001111" cy:nodeId="21678">
    <graphics z="0.0" y="-44.661800885456614" x="1361.0181351192296"/>
  </node>
  <node id="55621" label="0000001111" cy:nodeId="21679">
    <graphics z="0.0" y="198.48931453202385" x="274.5968094356358"/>
  </node>
  <node id="55620" label="0110101110" cy:nodeId="21680">
    <graphics z="0.0" y="-63.40642216231208" x="-367.9437636844814"/>
  </node>
  <node id="55619" label="0100101110" cy:nodeId="21681">
    <graphics z="0.0" y="159.04928157303948" x="-420.685615491122"/>
  </node>
  <node id="55618" label="1110101110" cy:nodeId="21682">
    <graphics z="0.0" y="124.46676204178948" x="-1147.6724624149501"/>
  </node>
  <node id="55617" label="1010110011" cy:nodeId="21683">
    <graphics z="0.0" y="29.564586138469167" x="1224.8807526119053"/>
  </node>
  <node id="55616" label="1010100111" cy:nodeId="21684">
    <graphics z="0.0" y="-26.52445652510505" x="1192.3765488155186"/>
  </node>
  <node id="55615" label="0010110011" cy:nodeId="21685">
    <graphics z="0.0" y="26.058215594035573" x="751.048286486417"/>
  </node>
  <node id="55614" label="0010100111" cy:nodeId="21686">
    <graphics z="0.0" y="86.38750836823601" x="564.8936386592686"/>
  </node>
  <node id="55613" label="0101010111" cy:nodeId="21687">
    <graphics z="0.0" y="23.38882014725823" x="182.80512242391706"/>
  </node>
  <node id="55612" label="1101010111" cy:nodeId="21688">
    <graphics z="0.0" y="370.00771663163323" x="1303.3423347957432"/>
  </node>
  <node id="55611" label="1100101110" cy:nodeId="21689">
    <graphics z="0.0" y="-51.97804310347419" x="-1108.8442763797939"/>
  </node>
  <node id="55610" label="1010101110" cy:nodeId="21690">
    <graphics z="0.0" y="-28.59286167647224" x="-1354.454866360873"/>
  </node>
  <node id="55609" label="1001101110" cy:nodeId="21691">
    <graphics z="0.0" y="-160.1529584171949" x="-1143.3071364872158"/>
  </node>
  <node id="55608" label="1000101110" cy:nodeId="21692">
    <graphics z="0.0" y="29.32626674149651" x="-1360.7188014499843"/>
  </node>
  <node id="55607" label="0010101110" cy:nodeId="21693">
    <graphics z="0.0" y="-188.72432758833747" x="-496.270820569247"/>
  </node>
  <node id="55606" label="0001101110" cy:nodeId="21694">
    <graphics z="0.0" y="-143.72254612471443" x="-389.6441039554775"/>
  </node>
  <node id="55605" label="0000101110" cy:nodeId="21695">
    <graphics z="0.0" y="20.681712603312917" x="-374.6960143558681"/>
  </node>
  <node id="55604" label="0001010111" cy:nodeId="21696">
    <graphics z="0.0" y="29.42486522172112" x="293.9108963496983"/>
  </node>
  <node id="55603" label="1001010111" cy:nodeId="21697">
    <graphics z="0.0" y="258.05215022538323" x="1340.3191299922764"/>
  </node>
  <node id="55602" label="0110111101" cy:nodeId="21698">
    <graphics z="0.0" y="-272.8043256046949" x="573.4639969356358"/>
  </node>
  <node id="55601" label="1110111101" cy:nodeId="21699">
    <graphics z="0.0" y="-17.10366489912849" x="1302.2949142940342"/>
  </node>
  <node id="55600" label="0111101110" cy:nodeId="21700">
    <graphics z="0.0" y="-101.35472538496833" x="-272.093330334872"/>
  </node>
  <node id="55599" label="1111101110" cy:nodeId="21701">
    <graphics z="0.0" y="43.04902217362542" x="-1023.0843123905361"/>
  </node>
  <node id="55598" label="0110100011" cy:nodeId="21702">
    <graphics z="0.0" y="194.74829432938714" x="508.70384984090924"/>
  </node>
  <node id="55597" label="0100110011" cy:nodeId="21703">
    <graphics z="0.0" y="-150.3994183781324" x="497.47964100912213"/>
  </node>
  <node id="55596" label="0100100111" cy:nodeId="21704">
    <graphics z="0.0" y="176.39245936844964" x="442.58367543295026"/>
  </node>
  <node id="55595" label="0100100011" cy:nodeId="21705">
    <graphics z="0.0" y="-1.9454083683667704" x="567.8759842403233"/>
  </node>
  <node id="55594" label="1110100011" cy:nodeId="21706">
    <graphics z="0.0" y="-5.4265485050855204" x="1346.107452441007"/>
  </node>
  <node id="55593" label="1100110011" cy:nodeId="21707">
    <graphics z="0.0" y="144.9869341609301" x="1084.327339220792"/>
  </node>
  <node id="55592" label="1100100111" cy:nodeId="21708">
    <graphics z="0.0" y="171.79671809647698" x="1055.1572647579014"/>
  </node>
  <node id="55591" label="0010111101" cy:nodeId="21709">
    <graphics z="0.0" y="-154.04831364180427" x="759.1281815059483"/>
  </node>
  <node id="55590" label="1010111101" cy:nodeId="21710">
    <graphics z="0.0" y="-133.59897282149177" x="1437.0008163936436"/>
  </node>
  <node id="55589" label="1100100011" cy:nodeId="21711">
    <graphics z="0.0" y="-39.55862095381599" x="1119.0118484981358"/>
  </node>
  <node id="55588" label="1010100011" cy:nodeId="21712">
    <graphics z="0.0" y="-191.2722211125074" x="1316.0424767024815"/>
  </node>
  <node id="55587" label="1001100011" cy:nodeId="21713">
    <graphics z="0.0" y="-233.12035038496833" x="1345.7148209102452"/>
  </node>
  <node id="55586" label="1000110011" cy:nodeId="21714">
    <graphics z="0.0" y="24.079333758098073" x="1099.5187759883702"/>
  </node>
  <node id="55585" label="1000100111" cy:nodeId="21715">
    <graphics z="0.0" y="-204.4749799015699" x="1046.0215683467686"/>
  </node>
  <node id="55584" label="1000100011" cy:nodeId="21716">
    <graphics z="0.0" y="-11.842091107624583" x="1304.4315109737217"/>
  </node>
  <node id="55583" label="0010100011" cy:nodeId="21717">
    <graphics z="0.0" y="200.60123012040276" x="708.1688614375889"/>
  </node>
  <node id="55582" label="0001100011" cy:nodeId="21718">
    <graphics z="0.0" y="150.75496242020745" x="460.1744852550328"/>
  </node>
  <node id="55581" label="0000110011" cy:nodeId="21719">
    <graphics z="0.0" y="31.11627147172112" x="535.9985275752842"/>
  </node>
  <node id="55580" label="0000100111" cy:nodeId="21720">
    <graphics z="0.0" y="108.5264963862719" x="461.93612675741315"/>
  </node>
  <node id="55579" label="0000100011" cy:nodeId="21721">
    <graphics z="0.0" y="251.82113215897698" x="593.7999496944249"/>
  </node>
  <node id="55578" label="0110010111" cy:nodeId="21722">
    <graphics z="0.0" y="1.7643770930590108" x="548.1005783565342"/>
  </node>
  <node id="55577" label="1110010111" cy:nodeId="21723">
    <graphics z="0.0" y="196.1466021296801" x="1203.6440582759678"/>
  </node>
  <node id="55576" label="0010010111" cy:nodeId="21724">
    <graphics z="0.0" y="133.52424952958245" x="478.07962231710553"/>
  </node>
  <node id="55575" label="1111100011" cy:nodeId="21725">
    <graphics z="0.0" y="-48.310158276814036" x="1402.4165115840733"/>
  </node>
  <node id="55574" label="1010010111" cy:nodeId="21726">
    <graphics z="0.0" y="145.00702998612542" x="1281.6031342037022"/>
  </node>
  <node id="55573" label="0111100011" cy:nodeId="21727">
    <graphics z="0.0" y="102.7017721888842" x="340.2987823970616"/>
  </node>
  <node id="55572" label="1100111101" cy:nodeId="21728">
    <graphics z="0.0" y="123.91714045975823" x="1082.9927292354405"/>
  </node>
  <node id="55571" label="0100111101" cy:nodeId="21729">
    <graphics z="0.0" y="-157.80350163008552" x="600.0589981563389"/>
  </node>
  <node id="55570" label="0101101110" cy:nodeId="21730">
    <graphics z="0.0" y="141.8684038874926" x="-313.81494898721576"/>
  </node>
  <node id="55569" label="1101101110" cy:nodeId="21731">
    <graphics z="0.0" y="-61.201345944660716" x="-1015.099906872958"/>
  </node>
  <node id="55568" label="1000111101" cy:nodeId="21732">
    <graphics z="0.0" y="-75.30358364607673" x="1197.3482132442296"/>
  </node>
  <node id="55567" label="0000111101" cy:nodeId="21733">
    <graphics z="0.0" y="-240.6262250187574" x="658.3517685420811"/>
  </node>
  <node id="55566" label="1111011101" cy:nodeId="21734">
    <graphics z="0.0" y="198.3730425593676" x="1454.4941788204014"/>
  </node>
  <node id="55565" label="1111011011" cy:nodeId="21735">
    <graphics z="0.0" y="165.64290950272698" x="1638.875434923917"/>
  </node>
  <node id="55564" label="0111011101" cy:nodeId="21736">
    <graphics z="0.0" y="-217.61050846602302" x="259.6009293086827"/>
  </node>
  <node id="55563" label="0111011011" cy:nodeId="21737">
    <graphics z="0.0" y="20.32897136185784" x="128.89188389852643"/>
  </node>
  <node id="55562" label="0100010111" cy:nodeId="21738">
    <graphics z="0.0" y="86.6499151942553" x="245.68326573446393"/>
  </node>
  <node id="55561" label="1100010111" cy:nodeId="21739">
    <graphics z="0.0" y="244.4112505671801" x="1146.9081039912999"/>
  </node>
  <node id="55560" label="0011011101" cy:nodeId="21740">
    <graphics z="0.0" y="33.443816637736745" x="558.9089661128819"/>
  </node>
  <node id="55559" label="0011011011" cy:nodeId="21741">
    <graphics z="0.0" y="113.56795260880608" x="460.6499910838902"/>
  </node>
  <node id="55558" label="1011011101" cy:nodeId="21742">
    <graphics z="0.0" y="-53.40772678877693" x="1577.786567736417"/>
  </node>
  <node id="55557" label="1011011011" cy:nodeId="21743">
    <graphics z="0.0" y="-9.579723859089427" x="1687.876869250089"/>
  </node>
  <node id="55556" label="1000010111" cy:nodeId="21744">
    <graphics z="0.0" y="116.83695552323479" x="1301.744632769376"/>
  </node>
  <node id="55555" label="0101100011" cy:nodeId="21745">
    <graphics z="0.0" y="-26.031071210163645" x="404.57645421102643"/>
  </node>
  <node id="55554" label="1101100011" cy:nodeId="21746">
    <graphics z="0.0" y="44.63985774491448" x="1215.9056702144444"/>
  </node>
  <node id="55553" label="0000010111" cy:nodeId="21747">
    <graphics z="0.0" y="120.56328151200432" x="458.0835857875645"/>
  </node>
  <node id="55552" label="0111111110" cy:nodeId="21748">
    <graphics z="0.0" y="81.3083452937426" x="-452.69405741617084"/>
  </node>
  <node id="55551" label="1111111110" cy:nodeId="21749">
    <graphics z="0.0" y="-3.317902112263255" x="-995.2037581913173"/>
  </node>
  <node id="55550" label="0011111110" cy:nodeId="21750">
    <graphics z="0.0" y="50.63308284257073" x="-617.4184493534267"/>
  </node>
  <node id="55549" label="1011111110" cy:nodeId="21751">
    <graphics z="0.0" y="-102.5596966984449" x="-1200.7613753788173"/>
  </node>
  <node id="55548" label="0101011101" cy:nodeId="21752">
    <graphics z="0.0" y="-305.9259076359449" x="290.7817001827061"/>
  </node>
  <node id="55547" label="0101011011" cy:nodeId="21753">
    <graphics z="0.0" y="-136.21513798262458" x="227.80593113973737"/>
  </node>
  <node id="55546" label="1101011101" cy:nodeId="21754">
    <graphics z="0.0" y="231.80929133866448" x="1277.3532162196934"/>
  </node>
  <node id="55545" label="1101011011" cy:nodeId="21755">
    <graphics z="0.0" y="45.10726497147698" x="1626.345405627042"/>
  </node>
  <node id="55544" label="0001011101" cy:nodeId="21756">
    <graphics z="0.0" y="-284.33160831953865" x="558.733589220792"/>
  </node>
  <node id="55543" label="0001011011" cy:nodeId="21757">
    <graphics z="0.0" y="-93.29405643965583" x="368.7121201045811"/>
  </node>
  <node id="55542" label="1001011101" cy:nodeId="21758">
    <graphics z="0.0" y="36.25484797928948" x="1498.8405533321202"/>
  </node>
  <node id="55541" label="1001011011" cy:nodeId="21759">
    <graphics z="0.0" y="-15.355465436237864" x="1638.1406326778233"/>
  </node>
  <node id="55540" label="0101111110" cy:nodeId="21760">
    <graphics z="0.0" y="250.98592708085198" x="-421.25120539590716"/>
  </node>
  <node id="55539" label="1101111110" cy:nodeId="21761">
    <graphics z="0.0" y="-132.14855625655036" x="-1096.6755752079189"/>
  </node>
  <node id="55538" label="0001111110" cy:nodeId="21762">
    <graphics z="0.0" y="79.74062678788323" x="-445.19479746744037"/>
  </node>
  <node id="55537" label="1001111110" cy:nodeId="21763">
    <graphics z="0.0" y="-96.87148335005622" x="-1192.7300948612392"/>
  </node>
  <node id="55536" label="0111101101" cy:nodeId="21764">
    <graphics z="0.0" y="-120.7601361515699" x="240.50528721883893"/>
  </node>
  <node id="55535" label="0110011101" cy:nodeId="21765">
    <graphics z="0.0" y="-145.14969303633552" x="515.4204178340733"/>
  </node>
  <node id="55534" label="0110011011" cy:nodeId="21766">
    <graphics z="0.0" y="5.7453264949144796" x="598.3549881465733"/>
  </node>
  <node id="55533" label="1111101101" cy:nodeId="21767">
    <graphics z="0.0" y="272.43365046952385" x="1621.0666885860264"/>
  </node>
  <node id="55532" label="1110011101" cy:nodeId="21768">
    <graphics z="0.0" y="188.77291438553948" x="1298.4626236446202"/>
  </node>
  <node id="55531" label="1110011011" cy:nodeId="21769">
    <graphics z="0.0" y="81.32618281815667" x="1378.910560656339"/>
  </node>
  <node id="55530" label="0011101101" cy:nodeId="21770">
    <graphics z="0.0" y="81.39211223099846" x="484.3509941585362"/>
  </node>
  <node id="55529" label="0010011101" cy:nodeId="21771">
    <graphics z="0.0" y="15.354442095500417" x="604.1796036250889"/>
  </node>
  <node id="55528" label="0010011011" cy:nodeId="21772">
    <graphics z="0.0" y="161.04177424882073" x="584.8144302852452"/>
  </node>
  <node id="55527" label="1010011101" cy:nodeId="21773">
    <graphics z="0.0" y="24.34188411210198" x="1386.751251269132"/>
  </node>
  <node id="55526" label="1010011011" cy:nodeId="21774">
    <graphics z="0.0" y="37.268611407023855" x="1442.2329178340733"/>
  </node>
  <node id="55525" label="1011101101" cy:nodeId="21775">
    <graphics z="0.0" y="-136.51280262495857" x="1533.103431750089"/>
  </node>
  <node id="55524" label="1110111110" cy:nodeId="21776">
    <graphics z="0.0" y="2.2825503108324483" x="-1083.9262618534267"/>
  </node>
  <node id="55523" label="0110111110" cy:nodeId="21777">
    <graphics z="0.0" y="160.77114436600823" x="-646.8212050907314"/>
  </node>
  <node id="55522" label="0010111110" cy:nodeId="21778">
    <graphics z="0.0" y="0.07801387284416705" x="-585.8339538089931"/>
  </node>
  <node id="55521" label="1010111110" cy:nodeId="21779">
    <graphics z="0.0" y="-131.6941724064527" x="-1237.8358306400478"/>
  </node>
  <node id="55520" label="0111000111" cy:nodeId="21780">
    <graphics z="0.0" y="225.7529711482348" x="202.0878983028233"/>
  </node>
  <node id="55519" label="1111000111" cy:nodeId="21781">
    <graphics z="0.0" y="246.8874468562426" x="1499.6166763789952"/>
  </node>
  <node id="55518" label="0100011101" cy:nodeId="21782">
    <graphics z="0.0" y="-213.80844547774177" x="387.08604054525495"/>
  </node>
  <node id="55517" label="0100011011" cy:nodeId="21783">
    <graphics z="0.0" y="-173.35001041914802" x="354.6299362666905"/>
  </node>
  <node id="55516" label="0101101101" cy:nodeId="21784">
    <graphics z="0.0" y="-242.93680241133552" x="278.46743016317487"/>
  </node>
  <node id="55515" label="1101101101" cy:nodeId="21785">
    <graphics z="0.0" y="90.09579036210198" x="1398.1439819820225"/>
  </node>
  <node id="55514" label="1100011101" cy:nodeId="21786">
    <graphics z="0.0" y="171.24554011796135" x="1236.3548584468663"/>
  </node>
  <node id="55513" label="1100011011" cy:nodeId="21787">
    <graphics z="0.0" y="112.35959956620354" x="1313.1578026302159"/>
  </node>
  <node id="55512" label="1011000111" cy:nodeId="21788">
    <graphics z="0.0" y="203.27679011796135" x="1438.7418442256749"/>
  </node>
  <node id="55511" label="0011000111" cy:nodeId="21789">
    <graphics z="0.0" y="342.93694636796135" x="278.67076878622174"/>
  </node>
  <node id="55510" label="0111110110" cy:nodeId="21790">
    <graphics z="0.0" y="136.35592219803948" x="-663.7582931034267"/>
  </node>
  <node id="55509" label="1111110110" cy:nodeId="21791">
    <graphics z="0.0" y="195.56936213944573" x="-1094.3304671756923"/>
  </node>
  <node id="55508" label="1011101001" cy:nodeId="21792">
    <graphics z="0.0" y="-266.7248120548902" x="1531.391792345792"/>
  </node>
  <node id="55507" label="1001101101" cy:nodeId="21793">
    <graphics z="0.0" y="-133.63481571699958" x="1378.7761459834874"/>
  </node>
  <node id="55506" label="0011101001" cy:nodeId="21794">
    <graphics z="0.0" y="-4.284527325886302" x="695.571968127042"/>
  </node>
  <node id="55505" label="0001101101" cy:nodeId="21795">
    <graphics z="0.0" y="-248.52167179610115" x="361.2240067012608"/>
  </node>
  <node id="55504" label="1000011101" cy:nodeId="21796">
    <graphics z="0.0" y="22.90622279618401" x="1207.2309189327061"/>
  </node>
  <node id="55503" label="1000011011" cy:nodeId="21797">
    <graphics z="0.0" y="-48.87330677534919" x="1385.2387314327061"/>
  </node>
  <node id="55502" label="0100111110" cy:nodeId="21798">
    <graphics z="0.0" y="228.7274126765551" x="-426.5115546695888"/>
  </node>
  <node id="55501" label="1100111110" cy:nodeId="21799">
    <graphics z="0.0" y="-118.91819050337654" x="-1072.8822249881923"/>
  </node>
  <node id="55500" label="0011110110" cy:nodeId="21800">
    <graphics z="0.0" y="-66.30313541914802" x="-631.6367110721767"/>
  </node>
  <node id="55499" label="1011110110" cy:nodeId="21801">
    <graphics z="0.0" y="183.1888384578051" x="-1192.4870833866298"/>
  </node>
  <node id="55498" label="0000011101" cy:nodeId="21802">
    <graphics z="0.0" y="-85.28941776778083" x="560.2398682124913"/>
  </node>
  <node id="55497" label="0000011011" cy:nodeId="21803">
    <graphics z="0.0" y="-6.065121197956614" x="598.0384445674717"/>
  </node>
  <node id="55496" label="1000111110" cy:nodeId="21804">
    <graphics z="0.0" y="-169.05363132979255" x="-1320.0329589359462"/>
  </node>
  <node id="55495" label="0000111110" cy:nodeId="21805">
    <graphics z="0.0" y="138.26678035233635" x="-635.7138289920986"/>
  </node>
  <node id="55494" label="0101000111" cy:nodeId="21806">
    <graphics z="0.0" y="176.15366694901604" x="113.1351395137608"/>
  </node>
  <node id="55493" label="1101000111" cy:nodeId="21807">
    <graphics z="0.0" y="370.23418757889885" x="1494.7022324092686"/>
  </node>
  <node id="55492" label="0001000111" cy:nodeId="21808">
    <graphics z="0.0" y="99.31133410905022" x="206.05783848837018"/>
  </node>
  <node id="55491" label="0101110110" cy:nodeId="21809">
    <graphics z="0.0" y="242.19594905350823" x="-372.0037993900478"/>
  </node>
  <node id="55490" label="1001000111" cy:nodeId="21810">
    <graphics z="0.0" y="153.31772944901604" x="1537.5655289180577"/>
  </node>
  <node id="55489" label="1101110110" cy:nodeId="21811">
    <graphics z="0.0" y="74.43165156815667" x="-1201.5331191532314"/>
  </node>
  <node id="55488" label="0110101101" cy:nodeId="21812">
    <graphics z="0.0" y="-236.18582584883552" x="429.5048542506993"/>
  </node>
  <node id="55487" label="1110101101" cy:nodeId="21813">
    <graphics z="0.0" y="-82.31264736677986" x="1446.943275500089"/>
  </node>
  <node id="55486" label="0001110110" cy:nodeId="21814">
    <graphics z="0.0" y="-65.49028446699958" x="-397.88499445840716"/>
  </node>
  <node id="55485" label="1001110110" cy:nodeId="21815">
    <graphics z="0.0" y="98.53670833085198" x="-1501.5900649540126"/>
  </node>
  <node id="55484" label="1010101101" cy:nodeId="21816">
    <graphics z="0.0" y="-309.77948429610115" x="1339.7032547481358"/>
  </node>
  <node id="55483" label="0010101101" cy:nodeId="21817">
    <graphics z="0.0" y="-66.60387089278083" x="455.1782145984471"/>
  </node>
  <node id="55482" label="0111111001" cy:nodeId="21818">
    <graphics z="0.0" y="-247.3360638859449" x="493.22131733968854"/>
  </node>
  <node id="55481" label="0111110101" cy:nodeId="21819">
    <graphics z="0.0" y="-70.98294498946052" x="299.60597996786237"/>
  </node>
  <node id="55480" label="1111111001" cy:nodeId="21820">
    <graphics z="0.0" y="-20.295521283405833" x="1434.9121475704014"/>
  </node>
  <node id="55479" label="1111110101" cy:nodeId="21821">
    <graphics z="0.0" y="204.8366656062426" x="1134.6468124873936"/>
  </node>
  <node id="55478" label="0011111001" cy:nodeId="21822">
    <graphics z="0.0" y="-185.44803288008552" x="660.804863024503"/>
  </node>
  <node id="55477" label="0011110101" cy:nodeId="21823">
    <graphics z="0.0" y="-9.374866986530833" x="625.5882187373936"/>
  </node>
  <node id="55476" label="0110000111" cy:nodeId="21824">
    <graphics z="0.0" y="235.70992610428948" x="320.1075516231358"/>
  </node>
  <node id="55475" label="1011111001" cy:nodeId="21825">
    <graphics z="0.0" y="-186.66952183272224" x="1506.3817215450108"/>
  </node>
  <node id="55474" label="1011110101" cy:nodeId="21826">
    <graphics z="0.0" y="83.95026729081292" x="1259.1594944484532"/>
  </node>
  <node id="55473" label="1110000111" cy:nodeId="21827">
    <graphics z="0.0" y="245.48141047928948" x="1334.270912218839"/>
  </node>
  <node id="55472" label="0110101001" cy:nodeId="21828">
    <graphics z="0.0" y="-64.77989628340583" x="631.9509964473546"/>
  </node>
  <node id="55471" label="0100101101" cy:nodeId="21829">
    <graphics z="0.0" y="-102.02933170821052" x="436.1717949397862"/>
  </node>
  <node id="55470" label="0100101001" cy:nodeId="21830">
    <graphics z="0.0" y="-103.33961918379646" x="590.0199356563389"/>
  </node>
  <node id="55469" label="1110101001" cy:nodeId="21831">
    <graphics z="0.0" y="-109.20874741103034" x="1327.0979958064854"/>
  </node>
  <node id="55468" label="1100101101" cy:nodeId="21832">
    <graphics z="0.0" y="-7.102680707233958" x="1131.8498154170811"/>
  </node>
  <node id="55467" label="1010000111" cy:nodeId="21833">
    <graphics z="0.0" y="-54.562984967487864" x="1323.5786781795323"/>
  </node>
  <node id="55466" label="0010000111" cy:nodeId="21834">
    <graphics z="0.0" y="329.920253252727" x="437.4510813243687"/>
  </node>
  <node id="55465" label="0110110110" cy:nodeId="21835">
    <graphics z="0.0" y="44.77498958085198" x="-713.3868026249111"/>
  </node>
  <node id="55464" label="1110110110" cy:nodeId="21836">
    <graphics z="0.0" y="183.87217280839104" x="-1203.1959456913173"/>
  </node>
  <node id="55463" label="1100101001" cy:nodeId="21837">
    <graphics z="0.0" y="-136.4132123234449" x="1132.735054064542"/>
  </node>
  <node id="55462" label="1010101001" cy:nodeId="21838">
    <graphics z="0.0" y="-297.4913373234449" x="1375.3800659663975"/>
  </node>
  <node id="55461" label="1001101001" cy:nodeId="21839">
    <graphics z="0.0" y="-327.2624554875074" x="1471.3038254268467"/>
  </node>
  <node id="55460" label="1000101101" cy:nodeId="21840">
    <graphics z="0.0" y="-273.67145206953865" x="1126.6683121211827"/>
  </node>
  <node id="55459" label="1000101001" cy:nodeId="21841">
    <graphics z="0.0" y="-382.16208317305427" x="1305.6286125667393"/>
  </node>
  <node id="55458" label="0010101001" cy:nodeId="21842">
    <graphics z="0.0" y="48.31087062333245" x="771.6347427852452"/>
  </node>
  <node id="55457" label="0001101001" cy:nodeId="21843">
    <graphics z="0.0" y="-208.15887882735115" x="656.9035568721592"/>
  </node>
  <node id="55456" label="0000101101" cy:nodeId="21844">
    <graphics z="0.0" y="-54.06590702559333" x="588.100273180753"/>
  </node>
  <node id="55455" label="0000101001" cy:nodeId="21845">
    <graphics z="0.0" y="-81.90091373946052" x="755.8727798946202"/>
  </node>
  <node id="55454" label="0010110110" cy:nodeId="21846">
    <graphics z="0.0" y="-46.10161259199958" x="-771.8706893436611"/>
  </node>
  <node id="55453" label="1010110110" cy:nodeId="21847">
    <graphics z="0.0" y="24.083919024211355" x="-1313.0478343479335"/>
  </node>
  <node id="55452" label="0101111001" cy:nodeId="21848">
    <graphics z="0.0" y="-341.52536442305427" x="485.39704136922956"/>
  </node>
  <node id="55451" label="0101110101" cy:nodeId="21849">
    <graphics z="0.0" y="-252.4874310734449" x="379.64493565633893"/>
  </node>
  <node id="55450" label="1101111001" cy:nodeId="21850">
    <graphics z="0.0" y="-135.48899128462654" x="1376.1166992671788"/>
  </node>
  <node id="55449" label="1101110101" cy:nodeId="21851">
    <graphics z="0.0" y="152.78228328202385" x="1186.8318558223546"/>
  </node>
  <node id="55448" label="0111101001" cy:nodeId="21852">
    <graphics z="0.0" y="-234.06021549727302" x="323.10269932821393"/>
  </node>
  <node id="55447" label="0111001101" cy:nodeId="21853">
    <graphics z="0.0" y="29.77640101884026" x="263.05104832723737"/>
  </node>
  <node id="55446" label="0111001011" cy:nodeId="21854">
    <graphics z="0.0" y="99.37107799027581" x="250.26132969930768"/>
  </node>
  <node id="55445" label="0111001001" cy:nodeId="21855">
    <graphics z="0.0" y="-62.99437382246833" x="431.689327288419"/>
  </node>
  <node id="55444" label="0001111001" cy:nodeId="21856">
    <graphics z="0.0" y="-315.3188824894605" x="589.0216141231358"/>
  </node>
  <node id="55443" label="0001110101" cy:nodeId="21857">
    <graphics z="0.0" y="38.95227000687737" x="441.7340393550694"/>
  </node>
  <node id="55442" label="0100000111" cy:nodeId="21858">
    <graphics z="0.0" y="202.6475252864184" x="247.89318089559674"/>
  </node>
  <node id="55441" label="1001111001" cy:nodeId="21859">
    <graphics z="0.0" y="-178.1088223698316" x="1398.3532562740147"/>
  </node>
  <node id="55440" label="1001110101" cy:nodeId="21860">
    <graphics z="0.0" y="207.39364192460198" x="1164.1757660396397"/>
  </node>
  <node id="55439" label="1111101001" cy:nodeId="21861">
    <graphics z="0.0" y="-80.67316486861091" x="1617.5542068965733"/>
  </node>
  <node id="55438" label="1111001101" cy:nodeId="21862">
    <graphics z="0.0" y="79.77361628983635" x="1644.1577530391514"/>
  </node>
  <node id="55437" label="1111001011" cy:nodeId="21863">
    <graphics z="0.0" y="85.35404536698479" x="1646.0980301387608"/>
  </node>
  <node id="55436" label="1100000111" cy:nodeId="21864">
    <graphics z="0.0" y="288.07107112382073" x="1241.5456696040928"/>
  </node>
  <node id="55435" label="0000000111" cy:nodeId="21865">
    <graphics z="0.0" y="289.638270830852" x="278.40883641317487"/>
  </node>
  <node id="55434" label="0111111010" cy:nodeId="21866">
    <graphics z="0.0" y="-45.938602948444895" x="-319.0353469364345"/>
  </node>
  <node id="55433" label="0011001101" cy:nodeId="21867">
    <graphics z="0.0" y="253.59157893632073" x="416.3466854579747"/>
  </node>
  <node id="55432" label="0011001011" cy:nodeId="21868">
    <graphics z="0.0" y="263.5331682917895" x="274.66759495809674"/>
  </node>
  <node id="55431" label="0011001001" cy:nodeId="21869">
    <graphics z="0.0" y="360.3835100886645" x="483.07968144491315"/>
  </node>
  <node id="55430" label="1000000111" cy:nodeId="21870">
    <graphics z="0.0" y="127.5772661921801" x="1296.6008873470128"/>
  </node>
  <node id="55429" label="1111001001" cy:nodeId="21871">
    <graphics z="0.0" y="74.32175776932854" x="1504.015541125089"/>
  </node>
  <node id="55428" label="1011001101" cy:nodeId="21872">
    <graphics z="0.0" y="-99.36284496809822" x="1597.5933609493077"/>
  </node>
  <node id="55427" label="1011001011" cy:nodeId="21873">
    <graphics z="0.0" y="-124.09989597823005" x="1747.0657120235264"/>
  </node>
  <node id="55426" label="1011001001" cy:nodeId="21874">
    <graphics z="0.0" y="-221.43866398360115" x="1604.1597671993077"/>
  </node>
  <node id="55425" label="0100110110" cy:nodeId="21875">
    <graphics z="0.0" y="166.70681331132073" x="-649.2607650272548"/>
  </node>
  <node id="55424" label="1111111010" cy:nodeId="21876">
    <graphics z="0.0" y="6.943004107219167" x="-1086.8081283085048"/>
  </node>
  <node id="55423" label="1100110110" cy:nodeId="21877">
    <graphics z="0.0" y="-0.06973698164802045" x="-1315.3831157200038"/>
  </node>
  <node id="55422" label="1011111010" cy:nodeId="21878">
    <graphics z="0.0" y="-87.95787479903083" x="-1311.3420447818935"/>
  </node>
  <node id="55421" label="0011111010" cy:nodeId="21879">
    <graphics z="0.0" y="-90.19899418379646" x="-453.5834254734218"/>
  </node>
  <node id="55420" label="0000110110" cy:nodeId="21880">
    <graphics z="0.0" y="-32.25432255293708" x="-707.2499923221767"/>
  </node>
  <node id="55419" label="1000110110" cy:nodeId="21881">
    <graphics z="0.0" y="126.44338557694573" x="-1543.5573958866298"/>
  </node>
  <node id="55418" label="0101101001" cy:nodeId="21882">
    <graphics z="0.0" y="-230.14719059492927" x="405.3409615047276"/>
  </node>
  <node id="55417" label="0101001101" cy:nodeId="21883">
    <graphics z="0.0" y="-91.64250614668708" x="266.89408116415143"/>
  </node>
  <node id="55416" label="0101001011" cy:nodeId="21884">
    <graphics z="0.0" y="31.691478228312917" x="133.51410679891706"/>
  </node>
  <node id="55415" label="0110111001" cy:nodeId="21885">
    <graphics z="0.0" y="-239.28595402266365" x="695.5876083858311"/>
  </node>
  <node id="55414" label="0110110101" cy:nodeId="21886">
    <graphics z="0.0" y="-108.27827885176521" x="486.38363652303815"/>
  </node>
  <node id="55413" label="1101101001" cy:nodeId="21887">
    <graphics z="0.0" y="-176.89029362227302" x="1417.7999191768467"/>
  </node>
  <node id="55412" label="1101001101" cy:nodeId="21888">
    <graphics z="0.0" y="117.49013850663323" x="1534.4324112422764"/>
  </node>
  <node id="55411" label="1101001011" cy:nodeId="21889">
    <graphics z="0.0" y="18.591723894816823" x="1540.7982254512608"/>
  </node>
  <node id="55410" label="1110111001" cy:nodeId="21890">
    <graphics z="0.0" y="-45.9124684574781" x="1253.3256493099034"/>
  </node>
  <node id="55409" label="1110110101" cy:nodeId="21891">
    <graphics z="0.0" y="139.63836238358635" x="1060.3232651241124"/>
  </node>
  <node id="55408" label="0111100110" cy:nodeId="21892">
    <graphics z="0.0" y="-134.7324033024488" x="-437.20924754068255"/>
  </node>
  <node id="55407" label="1111100110" cy:nodeId="21893">
    <graphics z="0.0" y="184.4090533015551" x="-1227.059493970126"/>
  </node>
  <node id="55406" label="0010111001" cy:nodeId="21894">
    <graphics z="0.0" y="-84.8314252140699" x="853.3167801387608"/>
  </node>
  <node id="55405" label="0010110101" cy:nodeId="21895">
    <graphics z="0.0" y="-5.364971661823802" x="817.6262894161046"/>
  </node>
  <node id="55404" label="1010111001" cy:nodeId="21896">
    <graphics z="0.0" y="-203.33802464033943" x="1238.4184532649815"/>
  </node>
  <node id="55403" label="1010110101" cy:nodeId="21897">
    <graphics z="0.0" y="-95.24334766890388" x="1214.6661301143467"/>
  </node>
  <node id="55402" label="0001001101" cy:nodeId="21898">
    <graphics z="0.0" y="38.94539210770745" x="463.64500622823834"/>
  </node>
  <node id="55401" label="0001001011" cy:nodeId="21899">
    <graphics z="0.0" y="-15.24692204024177" x="327.1881866939366"/>
  </node>
  <node id="55400" label="0011100110" cy:nodeId="21900">
    <graphics z="0.0" y="-301.3269543888746" x="-512.3963965885341"/>
  </node>
  <node id="55399" label="0101111010" cy:nodeId="21901">
    <graphics z="0.0" y="87.23672053788323" x="-307.908027600497"/>
  </node>
  <node id="55398" label="1011100110" cy:nodeId="21902">
    <graphics z="0.0" y="123.51435420487542" x="-1250.561103772372"/>
  </node>
  <node id="55397" label="1001001101" cy:nodeId="21903">
    <graphics z="0.0" y="57.90780208085198" x="1465.2128983028233"/>
  </node>
  <node id="55396" label="1001001011" cy:nodeId="21904">
    <graphics z="0.0" y="-60.890770459431224" x="1634.744819689542"/>
  </node>
  <node id="55395" label="1101111010" cy:nodeId="21905">
    <graphics z="0.0" y="-168.78917362715583" x="-1081.192680310458"/>
  </node>
  <node id="55394" label="1011101010" cy:nodeId="21906">
    <graphics z="0.0" y="5.366954302531667" x="-1294.1596297733486"/>
  </node>
  <node id="55393" label="1001111010" cy:nodeId="21907">
    <graphics z="0.0" y="-286.7830853703199" x="-1233.8106688968837"/>
  </node>
  <node id="55392" label="0011101010" cy:nodeId="21908">
    <graphics z="0.0" y="-304.7887997868238" x="-331.61650843545794"/>
  </node>
  <node id="55391" label="0001111010" cy:nodeId="21909">
    <graphics z="0.0" y="42.517207598430105" x="-292.73067469522357"/>
  </node>
  <node id="55390" label="1111011110" cy:nodeId="21910">
    <graphics z="0.0" y="143.43281123612542" x="-1052.1208419315517"/>
  </node>
  <node id="55389" label="0111011110" cy:nodeId="21911">
    <graphics z="0.0" y="77.90041682694573" x="-213.9805831424892"/>
  </node>
  <node id="55388" label="0100111001" cy:nodeId="21912">
    <graphics z="0.0" y="-267.63742496992927" x="600.9279404170811"/>
  </node>
  <node id="55387" label="0100110101" cy:nodeId="21913">
    <graphics z="0.0" y="78.93738028977532" x="559.2730255611241"/>
  </node>
  <node id="55386" label="1100111001" cy:nodeId="21914">
    <graphics z="0.0" y="-74.85740711714607" x="1116.1492081172764"/>
  </node>
  <node id="55385" label="1100110101" cy:nodeId="21915">
    <graphics z="0.0" y="156.3301958796801" x="1001.708442736417"/>
  </node>
  <node id="55384" label="0011011110" cy:nodeId="21916">
    <graphics z="0.0" y="-0.22519352461677045" x="-467.4082374088466"/>
  </node>
  <node id="55383" label="0101100110" cy:nodeId="21917">
    <graphics z="0.0" y="47.617671465617605" x="-539.618965100497"/>
  </node>
  <node id="55382" label="1011011110" cy:nodeId="21918">
    <graphics z="0.0" y="21.34334895585198" x="-1204.7466811649501"/>
  </node>
  <node id="55381" label="1101100110" cy:nodeId="21919">
    <graphics z="0.0" y="70.95675227616448" x="-1051.6544723026454"/>
  </node>
  <node id="55380" label="1000111001" cy:nodeId="21920">
    <graphics z="0.0" y="-280.44176151778083" x="1283.2356453426182"/>
  </node>
  <node id="55379" label="1000110101" cy:nodeId="21921">
    <graphics z="0.0" y="14.381328081828542" x="1032.6467056758702"/>
  </node>
  <node id="55378" label="0000111001" cy:nodeId="21922">
    <graphics z="0.0" y="-182.41440250899177" x="749.8696976192296"/>
  </node>
  <node id="55377" label="0000110101" cy:nodeId="21923">
    <graphics z="0.0" y="-76.69748356367927" x="723.0470047481358"/>
  </node>
  <node id="55376" label="0110001101" cy:nodeId="21924">
    <graphics z="0.0" y="-26.94730045821052" x="414.1505127437413"/>
  </node>
  <node id="55375" label="0110001011" cy:nodeId="21925">
    <graphics z="0.0" y="208.60704371903557" x="470.2240067012608"/>
  </node>
  <node id="55374" label="0110001001" cy:nodeId="21926">
    <graphics z="0.0" y="76.38502547715325" x="649.2553635127842"/>
  </node>
  <node id="55373" label="1110001101" cy:nodeId="21927">
    <graphics z="0.0" y="31.080272173625417" x="1567.4045486934483"/>
  </node>
  <node id="55372" label="1110001011" cy:nodeId="21928">
    <graphics z="0.0" y="16.684627032023855" x="1476.4654312618077"/>
  </node>
  <node id="55371" label="0001100110" cy:nodeId="21929">
    <graphics z="0.0" y="-87.92595341231208" x="-464.92622942849994"/>
  </node>
  <node id="55370" label="1001100110" cy:nodeId="21930">
    <graphics z="0.0" y="-4.774559521931224" x="-1287.7326163761318"/>
  </node>
  <node id="55369" label="0010001101" cy:nodeId="21931">
    <graphics z="0.0" y="114.84359309647698" x="573.4973221309483"/>
  </node>
  <node id="55368" label="0010001011" cy:nodeId="21932">
    <graphics z="0.0" y="335.42458674882073" x="498.6900520808995"/>
  </node>
  <node id="55367" label="0010001001" cy:nodeId="21933">
    <graphics z="0.0" y="261.69919917557854" x="641.207206774503"/>
  </node>
  <node id="55366" label="1110001001" cy:nodeId="21934">
    <graphics z="0.0" y="-87.76248409773689" x="1433.5990982539952"/>
  </node>
  <node id="55365" label="1010001101" cy:nodeId="21935">
    <graphics z="0.0" y="-136.17023136641365" x="1346.3766174800694"/>
  </node>
  <node id="55364" label="1010001011" cy:nodeId="21936">
    <graphics z="0.0" y="-147.99007847334724" x="1509.777030993253"/>
  </node>
  <node id="55363" label="1010001001" cy:nodeId="21937">
    <graphics z="0.0" y="-247.45035221602302" x="1434.312934923917"/>
  </node>
  <node id="55362" label="0110111010" cy:nodeId="21938">
    <graphics z="0.0" y="-50.563236737507395" x="-511.04203410074115"/>
  </node>
  <node id="55361" label="1110111010" cy:nodeId="21939">
    <graphics z="0.0" y="35.58138606522698" x="-1142.2947005741298"/>
  </node>
  <node id="55360" label="1111011001" cy:nodeId="21940">
    <graphics z="0.0" y="172.34035823319573" x="1526.0264359004796"/>
  </node>
  <node id="55359" label="1111010101" cy:nodeId="21941">
    <graphics z="0.0" y="48.55329463456292" x="1393.8692551143467"/>
  </node>
  <node id="55358" label="1111010011" cy:nodeId="21942">
    <graphics z="0.0" y="266.15871760819573" x="1370.3888931758702"/>
  </node>
  <node id="55357" label="1111010001" cy:nodeId="21943">
    <graphics z="0.0" y="121.81594417069573" x="1419.921073962003"/>
  </node>
  <node id="55356" label="0111011001" cy:nodeId="21944">
    <graphics z="0.0" y="-144.62071659590583" x="403.34532933309674"/>
  </node>
  <node id="55355" label="0111010101" cy:nodeId="21945">
    <graphics z="0.0" y="88.0590719935717" x="395.88897709921"/>
  </node>
  <node id="55354" label="0111010011" cy:nodeId="21946">
    <graphics z="0.0" y="101.36155269120354" x="327.34206395223737"/>
  </node>
  <node id="55353" label="0111010001" cy:nodeId="21947">
    <graphics z="0.0" y="-143.0527386906324" x="453.6362267024815"/>
  </node>
  <node id="55352" label="1010111010" cy:nodeId="21948">
    <graphics z="0.0" y="-89.3690228703199" x="-1560.7558364383876"/>
  </node>
  <node id="55351" label="0101011110" cy:nodeId="21949">
    <graphics z="0.0" y="228.8546099421801" x="-302.48824305459857"/>
  </node>
  <node id="55350" label="0010111010" cy:nodeId="21950">
    <graphics z="0.0" y="-184.68143894698005" x="-473.1749119274318"/>
  </node>
  <node id="55349" label="1101011110" cy:nodeId="21951">
    <graphics z="0.0" y="68.29583308671135" x="-1137.427055310458"/>
  </node>
  <node id="55348" label="0011011001" cy:nodeId="21952">
    <graphics z="0.0" y="138.907443499309" x="617.7171860225499"/>
  </node>
  <node id="55347" label="0011010101" cy:nodeId="21953">
    <graphics z="0.0" y="190.64715144608635" x="581.239189196378"/>
  </node>
  <node id="55346" label="0011010011" cy:nodeId="21954">
    <graphics z="0.0" y="239.8225512263598" x="477.4734821803868"/>
  </node>
  <node id="55345" label="0011010001" cy:nodeId="21955">
    <graphics z="0.0" y="39.3596377131762" x="635.4771805293858"/>
  </node>
  <node id="55344" label="1011011001" cy:nodeId="21956">
    <graphics z="0.0" y="-35.95146610762458" x="1549.3469925411046"/>
  </node>
  <node id="55343" label="1011010101" cy:nodeId="21957">
    <graphics z="0.0" y="47.051326250773855" x="1445.9932785518467"/>
  </node>
  <node id="55342" label="1011010011" cy:nodeId="21958">
    <graphics z="0.0" y="137.76998469803948" x="1566.4316788204014"/>
  </node>
  <node id="55341" label="1011010001" cy:nodeId="21959">
    <graphics z="0.0" y="-191.71434452559333" x="1451.1067886836827"/>
  </node>
  <node id="55340" label="0001011110" cy:nodeId="21960">
    <graphics z="0.0" y="72.47478816483635" x="-258.1677169315517"/>
  </node>
  <node id="55339" label="1001011110" cy:nodeId="21961">
    <graphics z="0.0" y="-118.64503910567146" x="-1340.215997647494"/>
  </node>
  <node id="55338" label="0101001001" cy:nodeId="21962">
    <graphics z="0.0" y="3.0733599421801046" x="267.1682968623936"/>
  </node>
  <node id="55337" label="0100001101" cy:nodeId="21963">
    <graphics z="0.0" y="132.04487559769768" x="386.0492020137608"/>
  </node>
  <node id="55336" label="0100001011" cy:nodeId="21964">
    <graphics z="0.0" y="53.451899981242605" x="374.71715550497174"/>
  </node>
  <node id="55335" label="0100001001" cy:nodeId="21965">
    <graphics z="0.0" y="42.389651751262136" x="662.612495470792"/>
  </node>
  <node id="55334" label="1101001001" cy:nodeId="21966">
    <graphics z="0.0" y="-48.70838596846443" x="1376.9273682124913"/>
  </node>
  <node id="55333" label="1100001101" cy:nodeId="21967">
    <graphics z="0.0" y="63.67945430253167" x="1277.2954121120274"/>
  </node>
  <node id="55332" label="1100001011" cy:nodeId="21968">
    <graphics z="0.0" y="-124.4824319126783" x="1308.4205322749913"/>
  </node>
  <node id="55331" label="0110100110" cy:nodeId="21969">
    <graphics z="0.0" y="-132.00033237959724" x="-630.6784591190517"/>
  </node>
  <node id="55330" label="1110100110" cy:nodeId="21970">
    <graphics z="0.0" y="298.58367488358635" x="-1273.7463149540126"/>
  </node>
  <node id="55329" label="0001001001" cy:nodeId="21971">
    <graphics z="0.0" y="-4.631916547077708" x="594.2760239131749"/>
  </node>
  <node id="55328" label="0000001101" cy:nodeId="21972">
    <graphics z="0.0" y="196.75840327714104" x="477.5462837703526"/>
  </node>
  <node id="55327" label="0000001011" cy:nodeId="21973">
    <graphics z="0.0" y="158.30215785477776" x="577.6251602657139"/>
  </node>
  <node id="55326" label="0000001001" cy:nodeId="21974">
    <graphics z="0.0" y="99.38377711747307" x="734.8365860469639"/>
  </node>
  <node id="55325" label="1100001001" cy:nodeId="21975">
    <graphics z="0.0" y="-152.39423801924568" x="1208.1217842586339"/>
  </node>
  <node id="55324" label="1001001001" cy:nodeId="21976">
    <graphics z="0.0" y="-158.300751233357" x="1548.467720080167"/>
  </node>
  <node id="55323" label="1000001101" cy:nodeId="21977">
    <graphics z="0.0" y="-125.4611459019361" x="1375.545356798917"/>
  </node>
  <node id="55322" label="1000001011" cy:nodeId="21978">
    <graphics z="0.0" y="-170.83898594405036" x="1459.126380968839"/>
  </node>
  <node id="55321" label="1000001001" cy:nodeId="21979">
    <graphics z="0.0" y="-199.87147953535896" x="1314.1852722652256"/>
  </node>
  <node id="55320" label="0110101010" cy:nodeId="21980">
    <graphics z="0.0" y="-189.42640354658943" x="-297.31783289834857"/>
  </node>
  <node id="55319" label="0100111010" cy:nodeId="21981">
    <graphics z="0.0" y="49.718318438273855" x="-462.74877114221454"/>
  </node>
  <node id="55318" label="0100101010" cy:nodeId="21982">
    <graphics z="0.0" y="-94.04549076582771" x="-259.73572535440326"/>
  </node>
  <node id="55317" label="1110101010" cy:nodeId="21983">
    <graphics z="0.0" y="43.17270991776604" x="-1190.5539626590908"/>
  </node>
  <node id="55316" label="1100111010" cy:nodeId="21984">
    <graphics z="0.0" y="-272.48541691328865" x="-1069.2665633670986"/>
  </node>
  <node id="55315" label="0010100110" cy:nodeId="21985">
    <graphics z="0.0" y="-204.05274059798103" x="-639.6058578006923"/>
  </node>
  <node id="55314" label="1010100110" cy:nodeId="21986">
    <graphics z="0.0" y="131.32204768632073" x="-1353.9923047535121"/>
  </node>
  <node id="55313" label="0101011001" cy:nodeId="21987">
    <graphics z="0.0" y="-280.61471989180427" x="330.8976135738194"/>
  </node>
  <node id="55312" label="0101010101" cy:nodeId="21988">
    <graphics z="0.0" y="-68.47867252852302" x="352.46508030965924"/>
  </node>
  <node id="55311" label="0101010011" cy:nodeId="21989">
    <graphics z="0.0" y="-29.0803036930738" x="167.34439854696393"/>
  </node>
  <node id="55310" label="1101011001" cy:nodeId="21990">
    <graphics z="0.0" y="152.9741625544848" x="1464.4315262325108"/>
  </node>
  <node id="55309" label="1101010101" cy:nodeId="21991">
    <graphics z="0.0" y="285.91823909257073" x="1274.57212452963"/>
  </node>
  <node id="55308" label="1101010011" cy:nodeId="21992">
    <graphics z="0.0" y="142.5267748591723" x="1349.8560944087803"/>
  </node>
  <node id="55307" label="1100101010" cy:nodeId="21993">
    <graphics z="0.0" y="-263.1376233341871" x="-1215.5640029422939"/>
  </node>
  <node id="55306" label="1010101010" cy:nodeId="21994">
    <graphics z="0.0" y="-74.72827866103034" x="-1439.3341140262783"/>
  </node>
  <node id="55305" label="1001101010" cy:nodeId="21995">
    <graphics z="0.0" y="-191.71994450117927" x="-1383.0212783329189"/>
  </node>
  <node id="55304" label="1000111010" cy:nodeId="21996">
    <graphics z="0.0" y="-207.3718304875074" x="-1298.185142468661"/>
  </node>
  <node id="55303" label="1000101010" cy:nodeId="21997">
    <graphics z="0.0" y="-285.912022137898" x="-1466.8335418216884"/>
  </node>
  <node id="55302" label="0010101010" cy:nodeId="21998">
    <graphics z="0.0" y="-234.40696003462654" x="-427.08725733682513"/>
  </node>
  <node id="55301" label="0001101010" cy:nodeId="21999">
    <graphics z="0.0" y="-91.60274174239021" x="-247.40763087198138"/>
  </node>
  <node id="55300" label="0000111010" cy:nodeId="22000">
    <graphics z="0.0" y="-28.408634686726145" x="-424.73260493204"/>
  </node>
  <node id="55299" label="0000101010" cy:nodeId="22001">
    <graphics z="0.0" y="-174.54386570479255" x="-260.30200953409076"/>
  </node>
  <node id="55298" label="0001011001" cy:nodeId="22002">
    <graphics z="0.0" y="-163.97642948653083" x="543.752990771085"/>
  </node>
  <node id="55297" label="0001010101" cy:nodeId="22003">
    <graphics z="0.0" y="-82.7146039250074" x="463.6506176479161"/>
  </node>
  <node id="55296" label="0001010011" cy:nodeId="22004">
    <graphics z="0.0" y="36.53116176102776" x="305.5636063106358"/>
  </node>
  <node id="55295" label="1001011001" cy:nodeId="22005">
    <graphics z="0.0" y="-101.49920513655525" x="1492.2312393672764"/>
  </node>
  <node id="55294" label="1001010101" cy:nodeId="22006">
    <graphics z="0.0" y="205.8828081843676" x="1346.0377197749913"/>
  </node>
  <node id="55293" label="1001010011" cy:nodeId="22007">
    <graphics z="0.0" y="166.1447710749926" x="1376.3750000484288"/>
  </node>
  <node id="55292" label="0110011110" cy:nodeId="22008">
    <graphics z="0.0" y="67.9941363093676" x="-303.37483973428607"/>
  </node>
  <node id="55291" label="1110011110" cy:nodeId="22009">
    <graphics z="0.0" y="98.49808833573479" x="-1232.0047301761806"/>
  </node>
  <node id="55290" label="0111101010" cy:nodeId="22010">
    <graphics z="0.0" y="-243.9626803639112" x="-198.58028407022357"/>
  </node>
  <node id="55289" label="0010011110" cy:nodeId="22011">
    <graphics z="0.0" y="-1.724018597858958" x="-494.0364627353847"/>
  </node>
  <node id="55288" label="0100100110" cy:nodeId="22012">
    <graphics z="0.0" y="98.79900691483635" x="-559.5116042606533"/>
  </node>
  <node id="55287" label="1111101010" cy:nodeId="22013">
    <graphics z="0.0" y="-62.88963844801765" x="-1157.405357312411"/>
  </node>
  <node id="55286" label="1010011110" cy:nodeId="22014">
    <graphics z="0.0" y="-23.337452435749583" x="-1483.5675277225673"/>
  </node>
  <node id="55285" label="1100100110" cy:nodeId="22015">
    <graphics z="0.0" y="43.06043574784417" x="-1310.793525647372"/>
  </node>
  <node id="55284" label="0000100110" cy:nodeId="22016">
    <graphics z="0.0" y="100.4797320124926" x="-433.56106562539935"/>
  </node>
  <node id="55283" label="1000100110" cy:nodeId="22017">
    <graphics z="0.0" y="72.18230769608635" x="-1475.2987441532314"/>
  </node>
  <node id="55282" label="0111110001" cy:nodeId="22018">
    <graphics z="0.0" y="-201.82672550703865" x="593.2492294795811"/>
  </node>
  <node id="55281" label="0111100101" cy:nodeId="22019">
    <graphics z="0.0" y="115.17483851884026" x="233.45092015340924"/>
  </node>
  <node id="55280" label="0110011001" cy:nodeId="22020">
    <graphics z="0.0" y="-93.7354779484449" x="665.4599228389561"/>
  </node>
  <node id="55279" label="0110010101" cy:nodeId="22021">
    <graphics z="0.0" y="-41.379269147175364" x="543.2197800166905"/>
  </node>
  <node id="55278" label="0110010011" cy:nodeId="22022">
    <graphics z="0.0" y="225.77686641190667" x="511.06676487997174"/>
  </node>
  <node id="55277" label="0110010001" cy:nodeId="22023">
    <graphics z="0.0" y="124.97493312333245" x="538.1196365840733"/>
  </node>
  <node id="55276" label="1111110001" cy:nodeId="22024">
    <graphics z="0.0" y="-97.65503408934455" x="1140.4086990840733"/>
  </node>
  <node id="55275" label="1111100101" cy:nodeId="22025">
    <graphics z="0.0" y="-14.75314762617927" x="1377.7854843623936"/>
  </node>
  <node id="55274" label="1110011001" cy:nodeId="22026">
    <graphics z="0.0" y="51.25814387772698" x="1194.9388657100499"/>
  </node>
  <node id="55273" label="1110010101" cy:nodeId="22027">
    <graphics z="0.0" y="127.91212031815667" x="1217.2065201289952"/>
  </node>
  <node id="55272" label="1110010011" cy:nodeId="22028">
    <graphics z="0.0" y="160.92303035233635" x="1382.3427734859288"/>
  </node>
  <node id="55271" label="1110010001" cy:nodeId="22029">
    <graphics z="0.0" y="129.58979365800042" x="1263.5156021602452"/>
  </node>
  <node id="55270" label="0100011110" cy:nodeId="22030">
    <graphics z="0.0" y="222.33187434647698" x="-285.28865809366107"/>
  </node>
  <node id="55269" label="1100011110" cy:nodeId="22031">
    <graphics z="0.0" y="75.6542925593676" x="-1241.2905730716884"/>
  </node>
  <node id="55268" label="0011110001" cy:nodeId="22032">
    <graphics z="0.0" y="-140.72606327559333" x="633.0530319698155"/>
  </node>
  <node id="55267" label="0011100101" cy:nodeId="22033">
    <graphics z="0.0" y="21.480906939250417" x="517.5391312129796"/>
  </node>
  <node id="55266" label="1011110001" cy:nodeId="22034">
    <graphics z="0.0" y="-169.7894101383863" x="1408.8399734981358"/>
  </node>
  <node id="55265" label="1011100101" cy:nodeId="22035">
    <graphics z="0.0" y="-150.90267612959724" x="1453.7216873653233"/>
  </node>
  <node id="55264" label="0010011001" cy:nodeId="22036">
    <graphics z="0.0" y="143.11893413041253" x="814.6504898555577"/>
  </node>
  <node id="55263" label="0010010101" cy:nodeId="22037">
    <graphics z="0.0" y="96.23846194718499" x="642.8160629756749"/>
  </node>
  <node id="55262" label="0010010011" cy:nodeId="22038">
    <graphics z="0.0" y="185.45037410233635" x="657.4049454219639"/>
  </node>
  <node id="55261" label="0010010001" cy:nodeId="22039">
    <graphics z="0.0" y="228.80430171464104" x="627.9015732295811"/>
  </node>
  <node id="55260" label="1010011001" cy:nodeId="22040">
    <graphics z="0.0" y="-111.49202015425544" x="1203.561439562589"/>
  </node>
  <node id="55259" label="1010010101" cy:nodeId="22041">
    <graphics z="0.0" y="7.4154009578051046" x="1245.5286140926182"/>
  </node>
  <node id="55258" label="1010010011" cy:nodeId="22042">
    <graphics z="0.0" y="-89.32527401472908" x="1276.4538727290928"/>
  </node>
  <node id="55257" label="1010010001" cy:nodeId="22043">
    <graphics z="0.0" y="-199.47113468672615" x="1126.5788650996983"/>
  </node>
  <node id="55256" label="1011101100" cy:nodeId="22044">
    <graphics z="0.0" y="-25.466995740192942" x="-1374.7170829288661"/>
  </node>
  <node id="55255" label="0011101100" cy:nodeId="22045">
    <graphics z="0.0" y="-112.30791142012458" x="-444.85077280923724"/>
  </node>
  <node id="55254" label="0000011110" cy:nodeId="22046">
    <graphics z="0.0" y="245.0727495906176" x="-513.7595862857997"/>
  </node>
  <node id="55253" label="0101101010" cy:nodeId="22047">
    <graphics z="0.0" y="6.897746538859792" x="-132.48427576944232"/>
  </node>
  <node id="55252" label="1101101010" cy:nodeId="22048">
    <graphics z="0.0" y="-191.7161450627027" x="-1186.6998672001064"/>
  </node>
  <node id="55251" label="1000011110" cy:nodeId="22049">
    <graphics z="0.0" y="-160.557400250691" x="-1453.500556897372"/>
  </node>
  <node id="55250" label="0101010001" cy:nodeId="22050">
    <graphics z="0.0" y="-180.41080143477302" x="356.1613541133702"/>
  </node>
  <node id="55249" label="0100011001" cy:nodeId="22051">
    <graphics z="0.0" y="-289.1772809269605" x="495.8355331905186"/>
  </node>
  <node id="55248" label="0100010101" cy:nodeId="22052">
    <graphics z="0.0" y="-21.228207135456614" x="516.0825729854405"/>
  </node>
  <node id="55247" label="0100010011" cy:nodeId="22053">
    <graphics z="0.0" y="-11.425762677448802" x="354.04814152792096"/>
  </node>
  <node id="55246" label="0100010001" cy:nodeId="22054">
    <graphics z="0.0" y="-119.77962162520271" x="434.9208021648228"/>
  </node>
  <node id="55245" label="0101110001" cy:nodeId="22055">
    <graphics z="0.0" y="-388.04718449141365" x="471.1244774349034"/>
  </node>
  <node id="55244" label="0101100101" cy:nodeId="22056">
    <graphics z="0.0" y="-105.71602299239021" x="330.8450775630772"/>
  </node>
  <node id="55243" label="1101010001" cy:nodeId="22057">
    <graphics z="0.0" y="61.754939532023855" x="1298.7283821590245"/>
  </node>
  <node id="55242" label="1100011001" cy:nodeId="22058">
    <graphics z="0.0" y="81.56100032303948" x="1068.7524948604405"/>
  </node>
  <node id="55241" label="1100010101" cy:nodeId="22059">
    <graphics z="0.0" y="223.73775813553948" x="1073.5024185664952"/>
  </node>
  <node id="55240" label="1100010011" cy:nodeId="22060">
    <graphics z="0.0" y="-5.756557965534739" x="1164.705726671964"/>
  </node>
  <node id="55239" label="1100010001" cy:nodeId="22061">
    <graphics z="0.0" y="-9.664410138386302" x="1075.002357531339"/>
  </node>
  <node id="55238" label="1101110001" cy:nodeId="22062">
    <graphics z="0.0" y="30.400920366984792" x="1085.1341629512608"/>
  </node>
  <node id="55237" label="1101100101" cy:nodeId="22063">
    <graphics z="0.0" y="138.70125911210198" x="1180.9243546016514"/>
  </node>
  <node id="55236" label="1011100001" cy:nodeId="22064">
    <graphics z="0.0" y="-335.3077893498121" x="1381.6244507320225"/>
  </node>
  <node id="55235" label="1001110001" cy:nodeId="22065">
    <graphics z="0.0" y="27.51272151444573" x="1148.4899826534092"/>
  </node>
  <node id="55234" label="1001100101" cy:nodeId="22066">
    <graphics z="0.0" y="-71.97430088545661" x="1299.9631481654942"/>
  </node>
  <node id="55233" label="0011100001" cy:nodeId="22067">
    <graphics z="0.0" y="237.89321467850823" x="662.8786545284092"/>
  </node>
  <node id="55232" label="0001110001" cy:nodeId="22068">
    <graphics z="0.0" y="-204.9539838078199" x="558.4737396724522"/>
  </node>
  <node id="55231" label="0001100101" cy:nodeId="22069">
    <graphics z="0.0" y="134.7397303340258" x="370.0806427486241"/>
  </node>
  <node id="55230" label="0001010001" cy:nodeId="22070">
    <graphics z="0.0" y="-29.283886456745677" x="419.62298207357526"/>
  </node>
  <node id="55229" label="0000011001" cy:nodeId="22071">
    <graphics z="0.0" y="-10.185474896687083" x="652.2139053829014"/>
  </node>
  <node id="55228" label="0000010101" cy:nodeId="22072">
    <graphics z="0.0" y="-7.2728924992261454" x="409.5168228633702"/>
  </node>
  <node id="55227" label="0000010011" cy:nodeId="22073">
    <graphics z="0.0" y="48.113067126017995" x="606.0160141475499"/>
  </node>
  <node id="55226" label="0000010001" cy:nodeId="22074">
    <graphics z="0.0" y="-32.679569745319895" x="476.0641479976475"/>
  </node>
  <node id="55225" label="1001010001" cy:nodeId="22075">
    <graphics z="0.0" y="-45.661259198444895" x="1329.2764969356358"/>
  </node>
  <node id="55224" label="1000011001" cy:nodeId="22076">
    <graphics z="0.0" y="-125.59833385969978" x="1298.4905663020909"/>
  </node>
  <node id="55223" label="1000010101" cy:nodeId="22077">
    <graphics z="0.0" y="93.37041804764885" x="1177.912170458585"/>
  </node>
  <node id="55222" label="1000010011" cy:nodeId="22078">
    <graphics z="0.0" y="3.4388003108324483" x="1308.3452644832432"/>
  </node>
  <node id="55221" label="1000010001" cy:nodeId="22079">
    <graphics z="0.0" y="-90.06533005263191" x="1021.5863113887608"/>
  </node>
  <node id="55220" label="0110110001" cy:nodeId="22080">
    <graphics z="0.0" y="-15.292103314655833" x="659.9199295528233"/>
  </node>
  <node id="55219" label="0110100101" cy:nodeId="22081">
    <graphics z="0.0" y="49.64403102372307" x="332.9276199825108"/>
  </node>
  <node id="55218" label="1110110001" cy:nodeId="22082">
    <graphics z="0.0" y="10.094157671672292" x="1026.2432938106358"/>
  </node>
  <node id="55217" label="1110100101" cy:nodeId="22083">
    <graphics z="0.0" y="20.950259661418386" x="1220.1247711665928"/>
  </node>
  <node id="55216" label="0110101100" cy:nodeId="22084">
    <graphics z="0.0" y="1.192882036906667" x="-462.8733782283962"/>
  </node>
  <node id="55215" label="0100101100" cy:nodeId="22085">
    <graphics z="0.0" y="50.33065364335198" x="-442.14743227884173"/>
  </node>
  <node id="55214" label="1110101100" cy:nodeId="22086">
    <graphics z="0.0" y="-127.69118931319099" x="-1313.9953078739345"/>
  </node>
  <node id="55213" label="1010110001" cy:nodeId="22087">
    <graphics z="0.0" y="-143.690945172566" x="1175.8625031001866"/>
  </node>
  <node id="55212" label="1010100101" cy:nodeId="22088">
    <graphics z="0.0" y="-227.23041203047615" x="1267.2204304225743"/>
  </node>
  <node id="55211" label="0010110001" cy:nodeId="22089">
    <graphics z="0.0" y="63.18204066727776" x="836.9674454219639"/>
  </node>
  <node id="55210" label="0010100101" cy:nodeId="22090">
    <graphics z="0.0" y="102.17397067521233" x="588.8732681758702"/>
  </node>
  <node id="55209" label="1100101100" cy:nodeId="22091">
    <graphics z="0.0" y="-116.31726124312263" x="-1297.1695632450283"/>
  </node>
  <node id="55208" label="1010101100" cy:nodeId="22092">
    <graphics z="0.0" y="-172.14764835860115" x="-1413.5693282596767"/>
  </node>
  <node id="55207" label="1001101100" cy:nodeId="22093">
    <graphics z="0.0" y="-156.53766300703865" x="-1265.502983044833"/>
  </node>
  <node id="55206" label="1000101100" cy:nodeId="22094">
    <graphics z="0.0" y="-243.96731998946052" x="-1444.2149886600673"/>
  </node>
  <node id="55205" label="0010101100" cy:nodeId="22095">
    <graphics z="0.0" y="-229.61090137984138" x="-643.0827712528408"/>
  </node>
  <node id="55204" label="0001101100" cy:nodeId="22096">
    <graphics z="0.0" y="29.61104915116448" x="-636.9178084842861"/>
  </node>
  <node id="55203" label="0000101100" cy:nodeId="22097">
    <graphics z="0.0" y="0.6626848933519796" x="-529.8464965336025"/>
  </node>
  <node id="55202" label="0111101100" cy:nodeId="22098">
    <graphics z="0.0" y="-18.680408978718333" x="-298.32137293741107"/>
  </node>
  <node id="55201" label="0111001110" cy:nodeId="22099">
    <graphics z="0.0" y="30.259150957805105" x="-138.79946131631732"/>
  </node>
  <node id="55200" label="0111001100" cy:nodeId="22100">
    <graphics z="0.0" y="-76.88740971114021" x="-310.1280898563564"/>
  </node>
  <node id="55199" label="1111101100" cy:nodeId="22101">
    <graphics z="0.0" y="-117.84378101851325" x="-1126.6309585087001"/>
  </node>
  <node id="55198" label="1111001110" cy:nodeId="22102">
    <graphics z="0.0" y="191.7602495906176" x="-1139.1715621463954"/>
  </node>
  <node id="55197" label="0110100001" cy:nodeId="22103">
    <graphics z="0.0" y="111.57383487198967" x="563.1158295162022"/>
  </node>
  <node id="55196" label="0100110001" cy:nodeId="22104">
    <graphics z="0.0" y="-33.26425602461677" x="570.7043381221592"/>
  </node>
  <node id="55195" label="0100100101" cy:nodeId="22105">
    <graphics z="0.0" y="41.95700404618401" x="474.9937878139317"/>
  </node>
  <node id="55194" label="0100100001" cy:nodeId="22106">
    <graphics z="0.0" y="46.98855922196526" x="501.5790405757725"/>
  </node>
  <node id="55193" label="1110100001" cy:nodeId="22107">
    <graphics z="0.0" y="-206.40628483321052" x="1193.8572464473546"/>
  </node>
  <node id="55192" label="1100110001" cy:nodeId="22108">
    <graphics z="0.0" y="7.393504595500417" x="953.3167801387608"/>
  </node>
  <node id="55191" label="1100100101" cy:nodeId="22109">
    <graphics z="0.0" y="46.81716487382073" x="1106.9580154903233"/>
  </node>
  <node id="55190" label="0011001110" cy:nodeId="22110">
    <graphics z="0.0" y="-142.84725620772224" x="-217.8810500614345"/>
  </node>
  <node id="55189" label="1111001100" cy:nodeId="22111">
    <graphics z="0.0" y="-8.338177228230052" x="-1118.979560803622"/>
  </node>
  <node id="55188" label="1011001110" cy:nodeId="22112">
    <graphics z="0.0" y="145.7692064997973" x="-1274.5784759037197"/>
  </node>
  <node id="55187" label="1100100001" cy:nodeId="22113">
    <graphics z="0.0" y="-179.3172650578199" x="1064.1871567256749"/>
  </node>
  <node id="55186" label="1010100001" cy:nodeId="22114">
    <graphics z="0.0" y="-388.04718449141365" x="1257.986072588712"/>
  </node>
  <node id="55185" label="1001100001" cy:nodeId="22115">
    <graphics z="0.0" y="-192.20594456221443" x="1171.7788239009678"/>
  </node>
  <node id="55184" label="1000110001" cy:nodeId="22116">
    <graphics z="0.0" y="-121.61995556380134" x="1062.5787277705967"/>
  </node>
  <node id="55183" label="1000100101" cy:nodeId="22117">
    <graphics z="0.0" y="-165.47274448897224" x="1103.147132921964"/>
  </node>
  <node id="55182" label="1000100001" cy:nodeId="22118">
    <graphics z="0.0" y="-247.31329777266365" x="1108.4455338008702"/>
  </node>
  <node id="55181" label="0010100001" cy:nodeId="22119">
    <graphics z="0.0" y="214.60471675370354" x="774.2842789180577"/>
  </node>
  <node id="55180" label="0001100001" cy:nodeId="22120">
    <graphics z="0.0" y="-60.22102787520271" x="625.9234238155186"/>
  </node>
  <node id="55179" label="0000110001" cy:nodeId="22121">
    <graphics z="0.0" y="34.58169124100823" x="716.5513077266514"/>
  </node>
  <node id="55178" label="0000100101" cy:nodeId="22122">
    <graphics z="0.0" y="110.85684344742913" x="605.626884508878"/>
  </node>
  <node id="55177" label="0000100001" cy:nodeId="22123">
    <graphics z="0.0" y="93.39437625382561" x="770.3107681758702"/>
  </node>
  <node id="55176" label="0111100001" cy:nodeId="22124">
    <graphics z="0.0" y="-24.125843549030833" x="487.694755602628"/>
  </node>
  <node id="55175" label="0111000101" cy:nodeId="22125">
    <graphics z="0.0" y="198.76534602616448" x="372.9324570186436"/>
  </node>
  <node id="55174" label="0111000011" cy:nodeId="22126">
    <graphics z="0.0" y="234.20424983475823" x="360.7532730586827"/>
  </node>
  <node id="55173" label="0111000001" cy:nodeId="22127">
    <graphics z="0.0" y="73.46853873704094" x="357.4532547481358"/>
  </node>
  <node id="55172" label="1111100001" cy:nodeId="22128">
    <graphics z="0.0" y="-183.80640842940193" x="1305.1249619014561"/>
  </node>
  <node id="55171" label="1111000101" cy:nodeId="22129">
    <graphics z="0.0" y="-101.10493328596931" x="1295.0191574580967"/>
  </node>
  <node id="55170" label="1111000011" cy:nodeId="22130">
    <graphics z="0.0" y="-23.62167789961677" x="1359.6539307124913"/>
  </node>
  <node id="55169" label="0101101100" cy:nodeId="22131">
    <graphics z="0.0" y="154.15362117264885" x="-358.57622523233294"/>
  </node>
  <node id="55168" label="0101001110" cy:nodeId="22132">
    <graphics z="0.0" y="151.4193072078051" x="-134.79793543741107"/>
  </node>
  <node id="55167" label="1101101100" cy:nodeId="22133">
    <graphics z="0.0" y="-190.85905125166755" x="-991.003227185458"/>
  </node>
  <node id="55166" label="1101001110" cy:nodeId="22134">
    <graphics z="0.0" y="-29.612659955280833" x="-1215.131156872958"/>
  </node>
  <node id="55165" label="1111000001" cy:nodeId="22135">
    <graphics z="0.0" y="-143.75754215742927" x="1302.2187576778233"/>
  </node>
  <node id="55164" label="1011000101" cy:nodeId="22136">
    <graphics z="0.0" y="-28.69033482100349" x="1465.9990005977452"/>
  </node>
  <node id="55163" label="1011000011" cy:nodeId="22137">
    <graphics z="0.0" y="-37.576759839314036" x="1612.739662218839"/>
  </node>
  <node id="55162" label="1011000001" cy:nodeId="22138">
    <graphics z="0.0" y="-231.51933720137458" x="1524.2627487666905"/>
  </node>
  <node id="55161" label="0111110010" cy:nodeId="22139">
    <graphics z="0.0" y="-81.61417057539802" x="-495.42761416360736"/>
  </node>
  <node id="55160" label="0011001100" cy:nodeId="22140">
    <graphics z="0.0" y="-202.66667988325935" x="-378.4079589359462"/>
  </node>
  <node id="55159" label="0001001110" cy:nodeId="22141">
    <graphics z="0.0" y="-67.43841984297615" x="-168.57100672647357"/>
  </node>
  <node id="55158" label="1011001100" cy:nodeId="22142">
    <graphics z="0.0" y="131.00754878495354" x="-1311.8538588993251"/>
  </node>
  <node id="55157" label="1001001110" cy:nodeId="22143">
    <graphics z="0.0" y="-151.96600773360115" x="-1405.754447888583"/>
  </node>
  <node id="55156" label="1111110010" cy:nodeId="22144">
    <graphics z="0.0" y="152.19257686112542" x="-1187.4357985965908"/>
  </node>
  <node id="55155" label="0011000101" cy:nodeId="22145">
    <graphics z="0.0" y="197.9757036921801" x="400.7863312251866"/>
  </node>
  <node id="55154" label="0011000011" cy:nodeId="22146">
    <graphics z="0.0" y="384.32268855546135" x="503.5496140010655"/>
  </node>
  <node id="55153" label="0011000001" cy:nodeId="22147">
    <graphics z="0.0" y="208.90722987626214" x="524.18048100546"/>
  </node>
  <node id="55152" label="0011110010" cy:nodeId="22148">
    <graphics z="0.0" y="-79.60614445235115" x="-325.7794417850673"/>
  </node>
  <node id="55151" label="1011110010" cy:nodeId="22149">
    <graphics z="0.0" y="180.08538386796135" x="-1322.5479659549892"/>
  </node>
  <node id="55150" label="0101100001" cy:nodeId="22150">
    <graphics z="0.0" y="-180.14267399336677" x="379.4679565913975"/>
  </node>
  <node id="55149" label="0101000101" cy:nodeId="22151">
    <graphics z="0.0" y="127.58422801468987" x="184.8960037715733"/>
  </node>
  <node id="55148" label="0101000011" cy:nodeId="22152">
    <graphics z="0.0" y="109.6673655268969" x="117.09601597860456"/>
  </node>
  <node id="55147" label="1101100001" cy:nodeId="22153">
    <graphics z="0.0" y="-205.94987919356208" x="1234.6059990413487"/>
  </node>
  <node id="55146" label="1101000101" cy:nodeId="22154">
    <graphics z="0.0" y="148.09409663651604" x="1301.7449093349278"/>
  </node>
  <node id="55145" label="1101000011" cy:nodeId="22155">
    <graphics z="0.0" y="130.05115840409417" x="1489.9558182246983"/>
  </node>
  <node id="55144" label="0111111100" cy:nodeId="22156">
    <graphics z="0.0" y="162.1712603328051" x="-508.66233057901263"/>
  </node>
  <node id="55143" label="1111111100" cy:nodeId="22157">
    <graphics z="0.0" y="-130.8570599796949" x="-956.434867810458"/>
  </node>
  <node id="55142" label="0011111100" cy:nodeId="22158">
    <graphics z="0.0" y="-89.72562077071052" x="-651.6971206180751"/>
  </node>
  <node id="55141" label="0110001110" cy:nodeId="22159">
    <graphics z="0.0" y="-74.78705265547615" x="-208.11415858194232"/>
  </node>
  <node id="55140" label="0110001100" cy:nodeId="22160">
    <graphics z="0.0" y="-108.54035618330818" x="-300.9286269657314"/>
  </node>
  <node id="55139" label="0101110010" cy:nodeId="22161">
    <graphics z="0.0" y="122.5108599421801" x="-483.0218429081142"/>
  </node>
  <node id="55138" label="1011111100" cy:nodeId="22162">
    <graphics z="0.0" y="-150.90160801436286" x="-1195.761299084872"/>
  </node>
  <node id="55137" label="1001000101" cy:nodeId="22163">
    <graphics z="0.0" y="44.88047358964104" x="1312.677307177335"/>
  </node>
  <node id="55136" label="1001000011" cy:nodeId="22164">
    <graphics z="0.0" y="85.01411006425042" x="1498.349769640714"/>
  </node>
  <node id="55135" label="0001000101" cy:nodeId="22165">
    <graphics z="0.0" y="293.79578731034417" x="249.79843907430768"/>
  </node>
  <node id="55134" label="0001000011" cy:nodeId="22166">
    <graphics z="0.0" y="260.52480647538323" x="361.23944859579206"/>
  </node>
  <node id="55133" label="1101110010" cy:nodeId="22167">
    <graphics z="0.0" y="-45.368696713703685" x="-1282.7228888981044"/>
  </node>
  <node id="55132" label="1110001110" cy:nodeId="22168">
    <graphics z="0.0" y="239.98092219803948" x="-1239.813041638583"/>
  </node>
  <node id="55131" label="0011100010" cy:nodeId="22169">
    <graphics z="0.0" y="-272.9685788395582" x="-379.27752680704"/>
  </node>
  <node id="55130" label="0001110010" cy:nodeId="22170">
    <graphics z="0.0" y="-37.238163495319895" x="-397.26563258096576"/>
  </node>
  <node id="55129" label="0010001110" cy:nodeId="22171">
    <graphics z="0.0" y="-131.78939487959724" x="-349.492011975497"/>
  </node>
  <node id="55128" label="1011100010" cy:nodeId="22172">
    <graphics z="0.0" y="36.748233294230886" x="-1408.35760493204"/>
  </node>
  <node id="55127" label="1001110010" cy:nodeId="22173">
    <graphics z="0.0" y="-116.08610966231208" x="-1515.765464734286"/>
  </node>
  <node id="55126" label="1110001100" cy:nodeId="22174">
    <graphics z="0.0" y="104.70916316483635" x="-1413.6594085209072"/>
  </node>
  <node id="55125" label="1010001110" cy:nodeId="22175">
    <graphics z="0.0" y="134.02498958085198" x="-1421.0765075199306"/>
  </node>
  <node id="55124" label="1111010110" cy:nodeId="22176">
    <graphics z="0.0" y="251.5222124812426" x="-1317.5142821781337"/>
  </node>
  <node id="55123" label="1111010100" cy:nodeId="22177">
    <graphics z="0.0" y="144.49886653397698" x="-1162.958564709872"/>
  </node>
  <node id="55122" label="0111010110" cy:nodeId="22178">
    <graphics z="0.0" y="112.27032039139885" x="-372.1236724369228"/>
  </node>
  <node id="55121" label="0111010100" cy:nodeId="22179">
    <graphics z="0.0" y="232.71041438553948" x="-493.73920626565814"/>
  </node>
  <node id="55120" label="1011010110" cy:nodeId="22180">
    <graphics z="0.0" y="225.81594417069573" x="-1418.5142745487392"/>
  </node>
  <node id="55119" label="0011010110" cy:nodeId="22181">
    <graphics z="0.0" y="24.603877520305105" x="-529.2087325565517"/>
  </node>
  <node id="55118" label="0101111100" cy:nodeId="22182">
    <graphics z="0.0" y="360.52666804764885" x="-528.2661399357021"/>
  </node>
  <node id="55117" label="1101111100" cy:nodeId="22183">
    <graphics z="0.0" y="-239.05997135664802" x="-1079.2554854862392"/>
  </node>
  <node id="55116" label="0110000101" cy:nodeId="22184">
    <graphics z="0.0" y="138.48362300370354" x="405.2580185420811"/>
  </node>
  <node id="55115" label="0110000011" cy:nodeId="22185">
    <graphics z="0.0" y="335.70872065995354" x="452.1081667430699"/>
  </node>
  <node id="55114" label="0110000001" cy:nodeId="22186">
    <graphics z="0.0" y="231.0367846247973" x="522.3777390010655"/>
  </node>
  <node id="55113" label="1110000101" cy:nodeId="22187">
    <graphics z="0.0" y="19.465945696574636" x="1316.1141281612217"/>
  </node>
  <node id="55112" label="1110000011" cy:nodeId="22188">
    <graphics z="0.0" y="-3.6070065739331767" x="1516.5486221797764"/>
  </node>
  <node id="55111" label="0001111100" cy:nodeId="22189">
    <graphics z="0.0" y="258.02166316483635" x="-555.7863234989345"/>
  </node>
  <node id="55110" label="0101001100" cy:nodeId="22190">
    <graphics z="0.0" y="145.33303401444573" x="-270.7360305301845"/>
  </node>
  <node id="55109" label="0100001110" cy:nodeId="22191">
    <graphics z="0.0" y="202.35772273514885" x="-252.48256678506732"/>
  </node>
  <node id="55108" label="0100001100" cy:nodeId="22192">
    <graphics z="0.0" y="56.559138750773855" x="-405.9589766971767"/>
  </node>
  <node id="55107" label="1001111100" cy:nodeId="22193">
    <graphics z="0.0" y="-320.8247418644605" x="-1327.032705258578"/>
  </node>
  <node id="55106" label="1101001100" cy:nodeId="22194">
    <graphics z="0.0" y="-76.36020138289314" x="-1160.814262341708"/>
  </node>
  <node id="55105" label="1100001110" cy:nodeId="22195">
    <graphics z="0.0" y="45.295955157023855" x="-1192.409751843661"/>
  </node>
  <node id="55104" label="0010000101" cy:nodeId="22196">
    <graphics z="0.0" y="335.92327449296135" x="419.33450131490827"/>
  </node>
  <node id="55103" label="0010000011" cy:nodeId="22197">
    <graphics z="0.0" y="379.20635554764885" x="614.0740128047764"/>
  </node>
  <node id="55102" label="0010000001" cy:nodeId="22198">
    <graphics z="0.0" y="407.27849910233635" x="636.9388809688389"/>
  </node>
  <node id="55101" label="1110000001" cy:nodeId="22199">
    <graphics z="0.0" y="-181.54076817061286" x="1274.9876957423985"/>
  </node>
  <node id="55100" label="1010000101" cy:nodeId="22200">
    <graphics z="0.0" y="-190.32918980147224" x="1285.8573914058506"/>
  </node>
  <node id="55099" label="1010000011" cy:nodeId="22201">
    <graphics z="0.0" y="-37.58492710615974" x="1453.7721176631749"/>
  </node>
  <node id="55098" label="1010000001" cy:nodeId="22202">
    <graphics z="0.0" y="-350.1588177921949" x="1352.3563232906163"/>
  </node>
  <node id="55097" label="0110110010" cy:nodeId="22203">
    <graphics z="0.0" y="-63.421818280476145" x="-645.5335311405361"/>
  </node>
  <node id="55096" label="0010001100" cy:nodeId="22204">
    <graphics z="0.0" y="-184.05891468550544" x="-554.1622619144619"/>
  </node>
  <node id="55095" label="0001001100" cy:nodeId="22205">
    <graphics z="0.0" y="-25.54452946211677" x="-299.527900647372"/>
  </node>
  <node id="55094" label="0000001110" cy:nodeId="22206">
    <graphics z="0.0" y="25.440059160930105" x="-293.6503829471767"/>
  </node>
  <node id="55093" label="0000001100" cy:nodeId="22207">
    <graphics z="0.0" y="21.29458186600823" x="-443.76617236062884"/>
  </node>
  <node id="55092" label="1100001100" cy:nodeId="22208">
    <graphics z="0.0" y="-191.39938023115974" x="-1263.5012969486415"/>
  </node>
  <node id="55091" label="1010001100" cy:nodeId="22209">
    <graphics z="0.0" y="77.95333430741448" x="-1416.8973388187587"/>
  </node>
  <node id="55090" label="1001001100" cy:nodeId="22210">
    <graphics z="0.0" y="27.444148516398855" x="-1493.1098403446376"/>
  </node>
  <node id="55089" label="1000001110" cy:nodeId="22211">
    <graphics z="0.0" y="30.18460414384026" x="-1550.0321731083095"/>
  </node>
  <node id="55088" label="1000001100" cy:nodeId="22212">
    <graphics z="0.0" y="-127.9475026371656" x="-1476.8618087284267"/>
  </node>
  <node id="55087" label="1110110010" cy:nodeId="22213">
    <graphics z="0.0" y="81.75143001053948" x="-1146.6019973270595"/>
  </node>
  <node id="55086" label="1101010110" cy:nodeId="22214">
    <graphics z="0.0" y="276.7526507136645" x="-1426.1723708622158"/>
  </node>
  <node id="55085" label="0101010110" cy:nodeId="22215">
    <graphics z="0.0" y="280.43487117264885" x="-433.2619323246181"/>
  </node>
  <node id="55084" label="0010110010" cy:nodeId="22216">
    <graphics z="0.0" y="-192.59557011153083" x="-627.9677199833095"/>
  </node>
  <node id="55083" label="1010110010" cy:nodeId="22217">
    <graphics z="0.0" y="157.19703242753167" x="-1412.570625256747"/>
  </node>
  <node id="55082" label="1011010100" cy:nodeId="22218">
    <graphics z="0.0" y="167.17255732987542" x="-1326.7628669254482"/>
  </node>
  <node id="55081" label="1001010110" cy:nodeId="22219">
    <graphics z="0.0" y="166.00645015214104" x="-1371.0792388431728"/>
  </node>
  <node id="55080" label="0011010100" cy:nodeId="22220">
    <graphics z="0.0" y="-37.51962711836677" x="-505.46979136392474"/>
  </node>
  <node id="55079" label="0001010110" cy:nodeId="22221">
    <graphics z="0.0" y="162.2672075984301" x="-379.9072265140712"/>
  </node>
  <node id="55078" label="0101000001" cy:nodeId="22222">
    <graphics z="0.0" y="52.240622973185964" x="258.213554430753"/>
  </node>
  <node id="55077" label="0100000101" cy:nodeId="22223">
    <graphics z="0.0" y="66.71171996567864" x="344.0489120967686"/>
  </node>
  <node id="55076" label="0100000011" cy:nodeId="22224">
    <graphics z="0.0" y="161.3284640071215" x="332.9722214229405"/>
  </node>
  <node id="55075" label="0100000001" cy:nodeId="22225">
    <graphics z="0.0" y="166.90162227128167" x="422.442407656461"/>
  </node>
  <node id="55074" label="1101000001" cy:nodeId="22226">
    <graphics z="0.0" y="-77.98032619978767" x="1321.59067921713"/>
  </node>
  <node id="55073" label="1100000101" cy:nodeId="22227">
    <graphics z="0.0" y="-60.80183460738044" x="1189.9695053584874"/>
  </node>
  <node id="55072" label="1100000011" cy:nodeId="22228">
    <graphics z="0.0" y="-53.81696369673591" x="1397.625778246671"/>
  </node>
  <node id="55071" label="0110111100" cy:nodeId="22229">
    <graphics z="0.0" y="133.87517878983635" x="-649.7494735233486"/>
  </node>
  <node id="55070" label="1110111100" cy:nodeId="22230">
    <graphics z="0.0" y="-211.85716679121833" x="-1076.0082015506923"/>
  </node>
  <node id="55069" label="1100000001" cy:nodeId="22231">
    <graphics z="0.0" y="-144.41331913496833" x="1089.2681656368077"/>
  </node>
  <node id="55068" label="1001000001" cy:nodeId="22232">
    <graphics z="0.0" y="-141.4764333012281" x="1394.9368515498936"/>
  </node>
  <node id="55067" label="1000000101" cy:nodeId="22233">
    <graphics z="0.0" y="-63.463158154743724" x="1296.627367068082"/>
  </node>
  <node id="55066" label="1000000011" cy:nodeId="22234">
    <graphics z="0.0" y="-151.99139454390388" x="1352.8083725459874"/>
  </node>
  <node id="55065" label="1000000001" cy:nodeId="22235">
    <graphics z="0.0" y="-266.8148694279371" x="1151.977615404874"/>
  </node>
  <node id="55064" label="0001000001" cy:nodeId="22236">
    <graphics z="0.0" y="88.487822985393" x="277.64542393758893"/>
  </node>
  <node id="55063" label="0000000101" cy:nodeId="22237">
    <graphics z="0.0" y="322.2482409236254" x="382.97819523885846"/>
  </node>
  <node id="55062" label="0000000011" cy:nodeId="22238">
    <graphics z="0.0" y="263.633143877727" x="434.9213696010411"/>
  </node>
  <node id="55061" label="0000000001" cy:nodeId="22239">
    <graphics z="0.0" y="238.52845332596917" x="605.7013016231358"/>
  </node>
  <node id="55060" label="0110100010" cy:nodeId="22240">
    <graphics z="0.0" y="-210.6554532292066" x="-537.2605056278408"/>
  </node>
  <node id="55059" label="0100110010" cy:nodeId="22241">
    <graphics z="0.0" y="97.4086870906176" x="-688.1479415409267"/>
  </node>
  <node id="55058" label="0100100010" cy:nodeId="22242">
    <graphics z="0.0" y="64.82632014725823" x="-365.1164474003017"/>
  </node>
  <node id="55057" label="0010111100" cy:nodeId="22243">
    <graphics z="0.0" y="-117.19260075117927" x="-787.096733044833"/>
  </node>
  <node id="55056" label="1110100010" cy:nodeId="22244">
    <graphics z="0.0" y="23.333560442668386" x="-1435.9317473880947"/>
  </node>
  <node id="55055" label="1100110010" cy:nodeId="22245">
    <graphics z="0.0" y="-109.79750874068122" x="-1189.1985091678798"/>
  </node>
  <node id="55054" label="1010111100" cy:nodeId="22246">
    <graphics z="0.0" y="-134.10118534590583" x="-1347.974472951144"/>
  </node>
  <node id="55053" label="0010100010" cy:nodeId="22247">
    <graphics z="0.0" y="-358.2912945988355" x="-572.1319732181728"/>
  </node>
  <node id="55052" label="0001100010" cy:nodeId="22248">
    <graphics z="0.0" y="-273.4667439701734" x="-332.669990491122"/>
  </node>
  <node id="55051" label="0000110010" cy:nodeId="22249">
    <graphics z="0.0" y="-100.68260624434333" x="-672.1138839237392"/>
  </node>
  <node id="55050" label="0000100010" cy:nodeId="22250">
    <graphics z="0.0" y="-161.95001652266365" x="-522.2248610965908"/>
  </node>
  <node id="55049" label="1100100010" cy:nodeId="22251">
    <graphics z="0.0" y="-139.45305302168708" x="-1408.301567029208"/>
  </node>
  <node id="55048" label="1010100010" cy:nodeId="22252">
    <graphics z="0.0" y="77.76382014725823" x="-1500.9549331180751"/>
  </node>
  <node id="55047" label="1001100010" cy:nodeId="22253">
    <graphics z="0.0" y="41.09890315507073" x="-1681.1086043827236"/>
  </node>
  <node id="55046" label="1000110010" cy:nodeId="22254">
    <graphics z="0.0" y="-52.46084549452644" x="-1423.2766189090908"/>
  </node>
  <node id="55045" label="1000100010" cy:nodeId="22255">
    <graphics z="0.0" y="-35.955971265095286" x="-1602.4182052128017"/>
  </node>
  <node id="55044" label="1110010110" cy:nodeId="22256">
    <graphics z="0.0" y="320.37649104569573" x="-1271.4632567875087"/>
  </node>
  <node id="55043" label="1110010100" cy:nodeId="22257">
    <graphics z="0.0" y="178.50045344803948" x="-1285.9094390384853"/>
  </node>
  <node id="55042" label="0110010110" cy:nodeId="22258">
    <graphics z="0.0" y="87.0140337703051" x="-501.6286124698818"/>
  </node>
  <node id="55041" label="0110010100" cy:nodeId="22259">
    <graphics z="0.0" y="162.51247737382073" x="-743.602592419833"/>
  </node>
  <node id="55040" label="0111110100" cy:nodeId="22260">
    <graphics z="0.0" y="168.45867488358635" x="-696.9866713993251"/>
  </node>
  <node id="55039" label="1111110100" cy:nodeId="22261">
    <graphics z="0.0" y="36.95999476884026" x="-1064.902671765536"/>
  </node>
  <node id="55038" label="1010010110" cy:nodeId="22262">
    <graphics z="0.0" y="351.3890337703051" x="-1461.6899718753994"/>
  </node>
  <node id="55037" label="0010010110" cy:nodeId="22263">
    <graphics z="0.0" y="-9.55270817305427" x="-687.366020154208"/>
  </node>
  <node id="55036" label="0111100010" cy:nodeId="22264">
    <graphics z="0.0" y="-306.31396152998786" x="-395.60630030557513"/>
  </node>
  <node id="55035" label="0011110100" cy:nodeId="22265">
    <graphics z="0.0" y="88.27028987382073" x="-722.9392013065517"/>
  </node>
  <node id="55034" label="0100111100" cy:nodeId="22266">
    <graphics z="0.0" y="141.47417781327385" x="-719.705390881747"/>
  </node>
  <node id="55033" label="1011110100" cy:nodeId="22267">
    <graphics z="0.0" y="25.330028033000417" x="-1266.235076855868"/>
  </node>
  <node id="55032" label="1111100010" cy:nodeId="22268">
    <graphics z="0.0" y="73.94883296464104" x="-1276.4937133304775"/>
  </node>
  <node id="55031" label="1100111100" cy:nodeId="22269">
    <graphics z="0.0" y="-352.78265812422615" x="-1179.1178817264736"/>
  </node>
  <node id="55030" label="0000111100" cy:nodeId="22270">
    <graphics z="0.0" y="231.23711726639885" x="-726.1635360233486"/>
  </node>
  <node id="55029" label="1000111100" cy:nodeId="22271">
    <graphics z="0.0" y="-321.202549481648" x="-1497.4584578983486"/>
  </node>
  <node id="55028" label="1101010100" cy:nodeId="22272">
    <graphics z="0.0" y="49.23247096512932" x="-1427.7456359378994"/>
  </node>
  <node id="55027" label="1100010110" cy:nodeId="22273">
    <graphics z="0.0" y="120.00425288651604" x="-1332.3637485019863"/>
  </node>
  <node id="55026" label="1100010100" cy:nodeId="22274">
    <graphics z="0.0" y="-55.02485039259773" x="-1386.3864402286708"/>
  </node>
  <node id="55025" label="0101010100" cy:nodeId="22275">
    <graphics z="0.0" y="335.06609675858635" x="-527.8733481876552"/>
  </node>
  <node id="55024" label="0100010110" cy:nodeId="22276">
    <graphics z="0.0" y="273.5714983699145" x="-415.3744391910732"/>
  </node>
  <node id="55023" label="0100010100" cy:nodeId="22277">
    <graphics z="0.0" y="255.88686702225823" x="-551.7984618656337"/>
  </node>
  <node id="55022" label="1111011100" cy:nodeId="22278">
    <graphics z="0.0" y="41.83125636551995" x="-1070.7816695682704"/>
  </node>
  <node id="55021" label="1111011010" cy:nodeId="22279">
    <graphics z="0.0" y="220.95125911210198" x="-1025.504478406161"/>
  </node>
  <node id="55020" label="0111011100" cy:nodeId="22280">
    <graphics z="0.0" y="-17.444462323444895" x="-358.76303858682513"/>
  </node>
  <node id="55019" label="0111011010" cy:nodeId="22281">
    <graphics z="0.0" y="-19.132252240437083" x="-165.5107345096767"/>
  </node>
  <node id="55018" label="0101110100" cy:nodeId="22282">
    <graphics z="0.0" y="323.64959285233635" x="-604.4030074588954"/>
  </node>
  <node id="55017" label="1101110100" cy:nodeId="22283">
    <graphics z="0.0" y="-111.52996494795661" x="-1244.8368758670986"/>
  </node>
  <node id="55016" label="1010010100" cy:nodeId="22284">
    <graphics z="0.0" y="183.19593379471917" x="-1523.7759170047939"/>
  </node>
  <node id="55015" label="1001010100" cy:nodeId="22285">
    <graphics z="0.0" y="-72.96644547011238" x="-1526.1274184696376"/>
  </node>
  <node id="55014" label="1000010110" cy:nodeId="22286">
    <graphics z="0.0" y="73.63657710526604" x="-1552.959312390536"/>
  </node>
  <node id="55013" label="1000010100" cy:nodeId="22287">
    <graphics z="0.0" y="-63.02738049055915" x="-1594.1608809940517"/>
  </node>
  <node id="55012" label="0010010100" cy:nodeId="22288">
    <graphics z="0.0" y="-111.0689740421949" x="-787.6264266483486"/>
  </node>
  <node id="55011" label="0001010100" cy:nodeId="22289">
    <graphics z="0.0" y="74.1922564265551" x="-435.035411786288"/>
  </node>
  <node id="55010" label="0000010110" cy:nodeId="22290">
    <graphics z="0.0" y="150.74395320389885" x="-580.1659316532314"/>
  </node>
  <node id="55009" label="0000010100" cy:nodeId="22291">
    <graphics z="0.0" y="33.66183040116448" x="-522.2929610721767"/>
  </node>
  <node id="55008" label="0011011100" cy:nodeId="22292">
    <graphics z="0.0" y="-162.8514676335035" x="-441.5622825138271"/>
  </node>
  <node id="55007" label="0011011010" cy:nodeId="22293">
    <graphics z="0.0" y="-132.47415592696052" x="-219.21494288370013"/>
  </node>
  <node id="55006" label="0001110100" cy:nodeId="22294">
    <graphics z="0.0" y="148.1262163874926" x="-491.5987300388515"/>
  </node>
  <node id="55005" label="0101100010" cy:nodeId="22295">
    <graphics z="0.0" y="-176.72744038130622" x="-383.13691706582904"/>
  </node>
  <node id="55004" label="1011011100" cy:nodeId="22296">
    <graphics z="0.0" y="-65.00988724257331" x="-1369.2717589847744"/>
  </node>
  <node id="55003" label="1011011010" cy:nodeId="22297">
    <graphics z="0.0" y="79.14260432694573" x="-1278.8583297245204"/>
  </node>
  <node id="55002" label="1001110100" cy:nodeId="22298">
    <graphics z="0.0" y="-111.93287327315193" x="-1416.285095166415"/>
  </node>
  <node id="55001" label="1101100010" cy:nodeId="22299">
    <graphics z="0.0" y="-50.153367543476634" x="-1319.4151668064296"/>
  </node>
  <node id="55000" label="0101011100" cy:nodeId="22300">
    <graphics z="0.0" y="295.1572222468676" x="-433.9985274784267"/>
  </node>
  <node id="54999" label="0101011010" cy:nodeId="22301">
    <graphics z="0.0" y="118.64043757889885" x="-171.36379237100482"/>
  </node>
  <node id="54998" label="1101011100" cy:nodeId="22302">
    <graphics z="0.0" y="-113.1276669743238" x="-1209.5475387088954"/>
  </node>
  <node id="54997" label="1101011010" cy:nodeId="22303">
    <graphics z="0.0" y="-46.52499821211677" x="-1188.2123183719814"/>
  </node>
  <node id="54996" label="0110110100" cy:nodeId="22304">
    <graphics z="0.0" y="77.97137019608635" x="-828.3851851932704"/>
  </node>
  <node id="54995" label="0001011100" cy:nodeId="22305">
    <graphics z="0.0" y="149.2525591609301" x="-329.3600081913173"/>
  </node>
  <node id="54994" label="0001011010" cy:nodeId="22306">
    <graphics z="0.0" y="41.95699641678948" x="-217.166084241122"/>
  </node>
  <node id="54993" label="1001011100" cy:nodeId="22307">
    <graphics z="0.0" y="-108.89592411543708" x="-1445.1036071293056"/>
  </node>
  <node id="54992" label="1001011010" cy:nodeId="22308">
    <graphics z="0.0" y="-52.19844200636726" x="-1305.7306289188564"/>
  </node>
  <node id="54991" label="1110110100" cy:nodeId="22309">
    <graphics z="0.0" y="-69.79251148726325" x="-1124.4681319706142"/>
  </node>
  <node id="54990" label="0010110100" cy:nodeId="22310">
    <graphics z="0.0" y="-90.91182377364021" x="-856.434867810458"/>
  </node>
  <node id="54989" label="1010110100" cy:nodeId="22311">
    <graphics z="0.0" y="-122.13593342329841" x="-1367.1665400974452"/>
  </node>
  <node id="54988" label="0100110100" cy:nodeId="22312">
    <graphics z="0.0" y="293.78399226639885" x="-690.8435286991298"/>
  </node>
  <node id="54987" label="0110011100" cy:nodeId="22313">
    <graphics z="0.0" y="27.07595393632073" x="-616.3548812381923"/>
  </node>
  <node id="54986" label="0110011010" cy:nodeId="22314">
    <graphics z="0.0" y="62.04207942460198" x="-193.66957850381732"/>
  </node>
  <node id="54985" label="1100110100" cy:nodeId="22315">
    <graphics z="0.0" y="14.50539729569573" x="-1340.066122006625"/>
  </node>
  <node id="54984" label="1110011100" cy:nodeId="22316">
    <graphics z="0.0" y="-34.93737843062263" x="-1116.790855359286"/>
  </node>
  <node id="54983" label="1110011010" cy:nodeId="22317">
    <graphics z="0.0" y="-78.34199574019294" x="-1239.9438247196376"/>
  </node>
  <node id="54982" label="0000110100" cy:nodeId="22318">
    <graphics z="0.0" y="71.66933772538323" x="-763.2147140018642"/>
  </node>
  <node id="54981" label="0010011100" cy:nodeId="22319">
    <graphics z="0.0" y="-59.14078190352302" x="-471.04843897745013"/>
  </node>
  <node id="54980" label="0010011010" cy:nodeId="22320">
    <graphics z="0.0" y="-110.13299229170661" x="-351.1526488773525"/>
  </node>
  <node id="54979" label="1000110100" cy:nodeId="22321">
    <graphics z="0.0" y="-164.71944859053474" x="-1604.6805648319423"/>
  </node>
  <node id="54978" label="1010011100" cy:nodeId="22322">
    <graphics z="0.0" y="196.41567561600823" x="-1405.9232253544033"/>
  </node>
  <node id="54977" label="1010011010" cy:nodeId="22323">
    <graphics z="0.0" y="-15.77370884444099" x="-1535.9693374149501"/>
  </node>
  <node id="54976" label="0111100100" cy:nodeId="22324">
    <graphics z="0.0" y="11.023494219523855" x="-582.265823315829"/>
  </node>
  <node id="54975" label="0111000110" cy:nodeId="22325">
    <graphics z="0.0" y="-25.930042767780833" x="-244.2586593143642"/>
  </node>
  <node id="54974" label="0111000100" cy:nodeId="22326">
    <graphics z="0.0" y="68.48821589921135" x="-608.1551894657314"/>
  </node>
  <node id="54973" label="1111100100" cy:nodeId="22327">
    <graphics z="0.0" y="70.45540950272698" x="-1212.3866347782314"/>
  </node>
  <node id="54972" label="1111000110" cy:nodeId="22328">
    <graphics z="0.0" y="369.23870418046135" x="-1309.4953536503017"/>
  </node>
  <node id="54971" label="0011100100" cy:nodeId="22329">
    <graphics z="0.0" y="26.987727617961355" x="-716.6215743534267"/>
  </node>
  <node id="54970" label="0011000110" cy:nodeId="22330">
    <graphics z="0.0" y="-208.6916547062574" x="-429.249450635165"/>
  </node>
  <node id="54969" label="0100011100" cy:nodeId="22331">
    <graphics z="0.0" y="157.44280574296135" x="-566.0315703861415"/>
  </node>
  <node id="54968" label="0100011010" cy:nodeId="22332">
    <graphics z="0.0" y="83.5533404109301" x="-348.78162379190326"/>
  </node>
  <node id="54967" label="1111000100" cy:nodeId="22333">
    <graphics z="0.0" y="218.89919612382073" x="-1268.7471770755947"/>
  </node>
  <node id="54966" label="1011100100" cy:nodeId="22334">
    <graphics z="0.0" y="30.381267046672292" x="-1400.2710914127529"/>
  </node>
  <node id="54965" label="1011000110" cy:nodeId="22335">
    <graphics z="0.0" y="247.5112261531176" x="-1359.9395293705165"/>
  </node>
  <node id="54964" label="1100011100" cy:nodeId="22336">
    <graphics z="0.0" y="-238.0564770939527" x="-1256.2253188602626"/>
  </node>
  <node id="54963" label="1100011010" cy:nodeId="22337">
    <graphics z="0.0" y="-152.81974461104255" x="-1283.1475829593837"/>
  </node>
  <node id="54962" label="1011101000" cy:nodeId="22338">
    <graphics z="0.0" y="-227.35167362715583" x="-1488.2323684208095"/>
  </node>
  <node id="54961" label="0011101000" cy:nodeId="22339">
    <graphics z="0.0" y="-362.0693860294996" x="-386.1782149784267"/>
  </node>
  <node id="54960" label="0000011100" cy:nodeId="22340">
    <graphics z="0.0" y="73.3023638484301" x="-614.0408553592861"/>
  </node>
  <node id="54959" label="0000011010" cy:nodeId="22341">
    <graphics z="0.0" y="99.48662898514885" x="-481.03965754434466"/>
  </node>
  <node id="54958" label="1000011100" cy:nodeId="22342">
    <graphics z="0.0" y="-292.00336124922615" x="-1461.825881909579"/>
  </node>
  <node id="54957" label="1000011010" cy:nodeId="22343">
    <graphics z="0.0" y="-237.32040836836677" x="-1526.959312390536"/>
  </node>
  <node id="54956" label="0101100100" cy:nodeId="22344">
    <graphics z="0.0" y="210.8550982234301" x="-603.5290755741298"/>
  </node>
  <node id="54955" label="0101000110" cy:nodeId="22345">
    <graphics z="0.0" y="189.6485552546801" x="-242.95024866983294"/>
  </node>
  <node id="54954" label="1101100100" cy:nodeId="22346">
    <graphics z="0.0" y="-67.4411401989637" x="-1130.1268691532314"/>
  </node>
  <node id="54953" label="1101000110" cy:nodeId="22347">
    <graphics z="0.0" y="219.54629085038323" x="-1174.4869155399501"/>
  </node>
  <node id="54952" label="0011000100" cy:nodeId="22348">
    <graphics z="0.0" y="-33.18166019942146" x="-477.8407716266811"/>
  </node>
  <node id="54951" label="0001100100" cy:nodeId="22349">
    <graphics z="0.0" y="-34.98125126387458" x="-654.5962142460048"/>
  </node>
  <node id="54950" label="0001000110" cy:nodeId="22350">
    <graphics z="0.0" y="-23.618610883015208" x="-289.9006576053798"/>
  </node>
  <node id="54949" label="1011000100" cy:nodeId="22351">
    <graphics z="0.0" y="177.60479304764885" x="-1429.8470229618251"/>
  </node>
  <node id="54948" label="1001100100" cy:nodeId="22352">
    <graphics z="0.0" y="-167.01695683028083" x="-1323.0069331638515"/>
  </node>
  <node id="54947" label="1001000110" cy:nodeId="22353">
    <graphics z="0.0" y="131.5259203669848" x="-1387.634662579745"/>
  </node>
  <node id="54946" label="0111111000" cy:nodeId="22354">
    <graphics z="0.0" y="43.093379473430105" x="-402.10447688028216"/>
  </node>
  <node id="54945" label="1111111000" cy:nodeId="22355">
    <graphics z="0.0" y="-159.65736057783943" x="-1208.1952132694423"/>
  </node>
  <node id="54944" label="0110100100" cy:nodeId="22356">
    <graphics z="0.0" y="-103.99373295332771" x="-720.668769787997"/>
  </node>
  <node id="54943" label="0110000110" cy:nodeId="22357">
    <graphics z="0.0" y="-33.49191715742927" x="-451.29928202554584"/>
  </node>
  <node id="54942" label="0110000100" cy:nodeId="22358">
    <graphics z="0.0" y="-70.49380924727302" x="-562.365058850497"/>
  </node>
  <node id="54941" label="0011111000" cy:nodeId="22359">
    <graphics z="0.0" y="-160.22770359541755" x="-502.6414718143642"/>
  </node>
  <node id="54940" label="1011111000" cy:nodeId="22360">
    <graphics z="0.0" y="-252.7946820500074" x="-1373.024045895785"/>
  </node>
  <node id="54939" label="1110100100" cy:nodeId="22361">
    <graphics z="0.0" y="172.93329951737542" x="-1126.2931441776454"/>
  </node>
  <node id="54938" label="1110000110" cy:nodeId="22362">
    <graphics z="0.0" y="239.62844417069573" x="-1444.1321868412197"/>
  </node>
  <node id="54937" label="0110101000" cy:nodeId="22363">
    <graphics z="0.0" y="-108.50684788252693" x="-404.3455047123134"/>
  </node>
  <node id="54936" label="0100101000" cy:nodeId="22364">
    <graphics z="0.0" y="91.86977717850823" x="-503.40205378457904"/>
  </node>
  <node id="54935" label="1110101000" cy:nodeId="22365">
    <graphics z="0.0" y="-192.08980991865974" x="-1431.9492339603603"/>
  </node>
  <node id="54934" label="0010100100" cy:nodeId="22366">
    <graphics z="0.0" y="-165.07801487471443" x="-797.5878524295986"/>
  </node>
  <node id="54933" label="0010000110" cy:nodeId="22367">
    <graphics z="0.0" y="-254.36389973189216" x="-592.8966140262783"/>
  </node>
  <node id="54932" label="1110000100" cy:nodeId="22368">
    <graphics z="0.0" y="196.7354693171801" x="-1455.3275222294033"/>
  </node>
  <node id="54931" label="1010100100" cy:nodeId="22369">
    <graphics z="0.0" y="-46.38104298140388" x="-1430.4390029422939"/>
  </node>
  <node id="54930" label="1010000110" cy:nodeId="22370">
    <graphics z="0.0" y="312.63836238358635" x="-1402.7999038212001"/>
  </node>
  <node id="54929" label="1100101000" cy:nodeId="22371">
    <graphics z="0.0" y="-236.03001835371833" x="-1403.5956801883876"/>
  </node>
  <node id="54928" label="1010101000" cy:nodeId="22372">
    <graphics z="0.0" y="-139.78648808028083" x="-1569.6442794315517"/>
  </node>
  <node id="54927" label="1001101000" cy:nodeId="22373">
    <graphics z="0.0" y="-298.6257825138746" x="-1371.1064834110439"/>
  </node>
  <node id="54926" label="1000101000" cy:nodeId="22374">
    <graphics z="0.0" y="-282.6904340031324" x="-1602.4554671756923"/>
  </node>
  <node id="54925" label="0010101000" cy:nodeId="22375">
    <graphics z="0.0" y="-388.04718449141365" x="-516.5320891849697"/>
  </node>
  <node id="54924" label="0001101000" cy:nodeId="22376">
    <graphics z="0.0" y="-109.74096348311286" x="-484.116279553622"/>
  </node>
  <node id="54923" label="0000101000" cy:nodeId="22377">
    <graphics z="0.0" y="-146.08676579024177" x="-556.1365584842861"/>
  </node>
  <node id="54922" label="0101111000" cy:nodeId="22378">
    <graphics z="0.0" y="203.73537776444573" x="-313.6660537235439"/>
  </node>
  <node id="54921" label="1101111000" cy:nodeId="22379">
    <graphics z="0.0" y="-261.58234074141365" x="-1119.7330550663173"/>
  </node>
  <node id="54920" label="0111101000" cy:nodeId="22380">
    <graphics z="0.0" y="-148.39682438399177" x="-270.11406702920794"/>
  </node>
  <node id="54919" label="0111001010" cy:nodeId="22381">
    <graphics z="0.0" y="-127.33157017256599" x="-66.60512537881732"/>
  </node>
  <node id="54918" label="0111001000" cy:nodeId="22382">
    <graphics z="0.0" y="-195.69991734053474" x="-135.41240687295794"/>
  </node>
  <node id="54917" label="0101000100" cy:nodeId="22383">
    <graphics z="0.0" y="219.7067827937426" x="-470.1928348056972"/>
  </node>
  <node id="54916" label="0100100100" cy:nodeId="22384">
    <graphics z="0.0" y="186.24480769608635" x="-674.5792464725673"/>
  </node>
  <node id="54915" label="0100000110" cy:nodeId="22385">
    <graphics z="0.0" y="257.50042293046135" x="-452.4326095096767"/>
  </node>
  <node id="54914" label="0100000100" cy:nodeId="22386">
    <graphics z="0.0" y="249.73586604569573" x="-627.9416121952236"/>
  </node>
  <node id="54913" label="0001111000" cy:nodeId="22387">
    <graphics z="0.0" y="39.365107989055105" x="-421.56197352334857"/>
  </node>
  <node id="54912" label="1111101000" cy:nodeId="22388">
    <graphics z="0.0" y="-250.08429386641365" x="-1349.4280242435634"/>
  </node>
  <node id="54911" label="1111001010" cy:nodeId="22389">
    <graphics z="0.0" y="256.297206377727" x="-1283.9054336063564"/>
  </node>
  <node id="54910" label="1001111000" cy:nodeId="22390">
    <graphics z="0.0" y="-334.577793622273" x="-1405.8770751468837"/>
  </node>
  <node id="54909" label="1101000100" cy:nodeId="22391">
    <graphics z="0.0" y="73.94520137284417" x="-1337.4028262607753"/>
  </node>
  <node id="54908" label="1100100100" cy:nodeId="22392">
    <graphics z="0.0" y="-88.12353184248786" x="-1237.9475554935634"/>
  </node>
  <node id="54907" label="1100000110" cy:nodeId="22393">
    <graphics z="0.0" y="165.57171199296135" x="-1330.8499106876552"/>
  </node>
  <node id="54906" label="0010000100" cy:nodeId="22394">
    <graphics z="0.0" y="-135.6270337345777" x="-724.6312942020595"/>
  </node>
  <node id="54905" label="0001000100" cy:nodeId="22395">
    <graphics z="0.0" y="116.51497981522698" x="-427.1097106449306"/>
  </node>
  <node id="54904" label="0000100100" cy:nodeId="22396">
    <graphics z="0.0" y="37.362483477336355" x="-648.9637374393642"/>
  </node>
  <node id="54903" label="0000000110" cy:nodeId="22397">
    <graphics z="0.0" y="-99.40237858321052" x="-501.8087615482509"/>
  </node>
  <node id="54902" label="0000000100" cy:nodeId="22398">
    <graphics z="0.0" y="90.79830501053948" x="-653.8114394657314"/>
  </node>
  <node id="54901" label="0011001010" cy:nodeId="22399">
    <graphics z="0.0" y="-248.89873745467048" x="-157.18743128702044"/>
  </node>
  <node id="54900" label="0011001000" cy:nodeId="22400">
    <graphics z="0.0" y="-228.64018681074958" x="-267.55843348428607"/>
  </node>
  <node id="54899" label="1100000100" cy:nodeId="22401">
    <graphics z="0.0" y="55.981082415324636" x="-1391.2473906986415"/>
  </node>
  <node id="54898" label="1010000100" cy:nodeId="22402">
    <graphics z="0.0" y="213.85552546952385" x="-1585.8907699100673"/>
  </node>
  <node id="54897" label="1001000100" cy:nodeId="22403">
    <graphics z="0.0" y="-15.142010236042552" x="-1425.2115783207119"/>
  </node>
  <node id="54896" label="1000100100" cy:nodeId="22404">
    <graphics z="0.0" y="-136.50253727461677" x="-1531.832115124911"/>
  </node>
  <node id="54895" label="1000000110" cy:nodeId="22405">
    <graphics z="0.0" y="124.68213984940667" x="-1563.204429578036"/>
  </node>
  <node id="54894" label="1000000100" cy:nodeId="22406">
    <graphics z="0.0" y="-24.295658612507395" x="-1635.0006026737392"/>
  </node>
  <node id="54893" label="1111001000" cy:nodeId="22407">
    <graphics z="0.0" y="-251.42825748946052" x="-1386.7821845524013"/>
  </node>
  <node id="54892" label="1011001010" cy:nodeId="22408">
    <graphics z="0.0" y="177.54665706132073" x="-1496.7038192264736"/>
  </node>
  <node id="54891" label="1011001000" cy:nodeId="22409">
    <graphics z="0.0" y="-160.15158512617927" x="-1495.214927624911"/>
  </node>
  <node id="54890" label="0101101000" cy:nodeId="22410">
    <graphics z="0.0" y="57.47658870194573" x="-251.03760523721576"/>
  </node>
  <node id="54889" label="0101001010" cy:nodeId="22411">
    <graphics z="0.0" y="39.358760332805105" x="-69.74135584756732"/>
  </node>
  <node id="54888" label="0110111000" cy:nodeId="22412">
    <graphics z="0.0" y="-179.30699589278083" x="-448.6798820011318"/>
  </node>
  <node id="54887" label="1101101000" cy:nodeId="22413">
    <graphics z="0.0" y="-345.98422672774177" x="-1278.322723340243"/>
  </node>
  <node id="54886" label="1101001010" cy:nodeId="22414">
    <graphics z="0.0" y="-46.77212955977302" x="-1325.8754195682704"/>
  </node>
  <node id="54885" label="1110111000" cy:nodeId="22415">
    <graphics z="0.0" y="-163.6944852116285" x="-1305.5491790287197"/>
  </node>
  <node id="54884" label="0001001010" cy:nodeId="22416">
    <graphics z="0.0" y="-105.15919926192146" x="-97.5954513065517"/>
  </node>
  <node id="54883" label="0010111000" cy:nodeId="22417">
    <graphics z="0.0" y="-231.36794331099372" x="-606.8729629032314"/>
  </node>
  <node id="54882" label="1001001010" cy:nodeId="22418">
    <graphics z="0.0" y="-121.40836384322029" x="-1602.6342086307704"/>
  </node>
  <node id="54881" label="1010111000" cy:nodeId="22419">
    <graphics z="0.0" y="-307.6011090519605" x="-1380.3199233524501"/>
  </node>
  <node id="54880" label="0100111000" cy:nodeId="22420">
    <graphics z="0.0" y="134.20833919022698" x="-588.4327544681728"/>
  </node>
  <node id="54879" label="1100111000" cy:nodeId="22421">
    <graphics z="0.0" y="-312.6116986515699" x="-1223.7673186771572"/>
  </node>
  <node id="54878" label="0110001010" cy:nodeId="22422">
    <graphics z="0.0" y="-181.1456685307203" x="-198.8207931034267"/>
  </node>
  <node id="54877" label="0110001000" cy:nodeId="22423">
    <graphics z="0.0" y="-155.38576176192146" x="-130.74770350381732"/>
  </node>
  <node id="54876" label="0000111000" cy:nodeId="22424">
    <graphics z="0.0" y="-23.58145573164802" x="-654.9891280643642"/>
  </node>
  <node id="54875" label="1000111000" cy:nodeId="22425">
    <graphics z="0.0" y="-388.04718449141365" x="-1471.4863662235439"/>
  </node>
  <node id="54874" label="1110001010" cy:nodeId="22426">
    <graphics z="0.0" y="87.33249995682854" x="-1337.4361333362758"/>
  </node>
  <node id="54873" label="0010001010" cy:nodeId="22427">
    <graphics z="0.0" y="-309.26691105391365" x="-258.45793909952044"/>
  </node>
  <node id="54872" label="0010001000" cy:nodeId="22428">
    <graphics z="0.0" y="-295.55453922774177" x="-371.4297255985439"/>
  </node>
  <node id="54871" label="1110001000" cy:nodeId="22429">
    <graphics z="0.0" y="-93.2708611729322" x="-1461.3719176761806"/>
  </node>
  <node id="54870" label="1010001010" cy:nodeId="22430">
    <graphics z="0.0" y="101.21953914139885" x="-1654.3145980350673"/>
  </node>
  <node id="54869" label="1010001000" cy:nodeId="22431">
    <graphics z="0.0" y="-42.86907818343025" x="-1670.210014294833"/>
  </node>
  <node id="54868" label="1111011000" cy:nodeId="22432">
    <graphics z="0.0" y="49.38901088212151" x="-1260.0633620731533"/>
  </node>
  <node id="54867" label="1111010010" cy:nodeId="22433">
    <graphics z="0.0" y="325.8524126765551" x="-1318.987243603915"/>
  </node>
  <node id="54866" label="1111010000" cy:nodeId="22434">
    <graphics z="0.0" y="51.82955501053948" x="-1355.6553906910121"/>
  </node>
  <node id="54865" label="0111011000" cy:nodeId="22435">
    <graphics z="0.0" y="116.76458308671135" x="-306.81958765909076"/>
  </node>
  <node id="54864" label="0111010010" cy:nodeId="22436">
    <graphics z="0.0" y="111.07967708085198" x="-299.0577773563564"/>
  </node>
  <node id="54863" label="0111010000" cy:nodeId="22437">
    <graphics z="0.0" y="62.30898616288323" x="-556.4222182743251"/>
  </node>
  <node id="54862" label="0011011000" cy:nodeId="22438">
    <graphics z="0.0" y="1.6337847468676046" x="-478.0582274906337"/>
  </node>
  <node id="54861" label="0011010010" cy:nodeId="22439">
    <graphics z="0.0" y="167.6717486140551" x="-339.6228255741298"/>
  </node>
  <node id="54860" label="0011010000" cy:nodeId="22440">
    <graphics z="0.0" y="-52.03958561446052" x="-455.8376845829189"/>
  </node>
  <node id="54859" label="1011011000" cy:nodeId="22441">
    <graphics z="0.0" y="-74.43030502821784" x="-1519.933677624911"/>
  </node>
  <node id="54858" label="1011010010" cy:nodeId="22442">
    <graphics z="0.0" y="242.39236018632073" x="-1378.5055160038173"/>
  </node>
  <node id="54857" label="1011010000" cy:nodeId="22443">
    <graphics z="0.0" y="148.9718432185473" x="-1463.6552047245204"/>
  </node>
  <node id="54856" label="0101001000" cy:nodeId="22444">
    <graphics z="0.0" y="154.03786799882073" x="-124.25054163858294"/>
  </node>
  <node id="54855" label="0100001010" cy:nodeId="22445">
    <graphics z="0.0" y="-2.7129254582105204" x="-188.2145919315517"/>
  </node>
  <node id="54854" label="0100001000" cy:nodeId="22446">
    <graphics z="0.0" y="-18.111286664265208" x="-325.2510909549892"/>
  </node>
  <node id="54853" label="1101001000" cy:nodeId="22447">
    <graphics z="0.0" y="-118.89538242842536" x="-1293.6432570926845"/>
  </node>
  <node id="54852" label="1100001010" cy:nodeId="22448">
    <graphics z="0.0" y="6.555621599894948" x="-1162.8795089237392"/>
  </node>
  <node id="54851" label="0001001000" cy:nodeId="22449">
    <graphics z="0.0" y="-14.357792401569895" x="-184.06328577920794"/>
  </node>
  <node id="54850" label="0000001010" cy:nodeId="22450">
    <graphics z="0.0" y="21.421367144328542" x="-281.7047805301845"/>
  </node>
  <node id="54849" label="0000001000" cy:nodeId="22451">
    <graphics z="0.0" y="-94.05516483809333" x="-354.83272547647357"/>
  </node>
  <node id="54848" label="1100001000" cy:nodeId="22452">
    <graphics z="0.0" y="-251.30955936934333" x="-1312.7793483249843"/>
  </node>
  <node id="54847" label="1001001000" cy:nodeId="22453">
    <graphics z="0.0" y="-218.67607548262458" x="-1562.4525374881923"/>
  </node>
  <node id="54846" label="1000001010" cy:nodeId="22454">
    <graphics z="0.0" y="-18.771961713093333" x="-1565.423423718661"/>
  </node>
  <node id="54845" label="1000001000" cy:nodeId="22455">
    <graphics z="0.0" y="-196.78752567793708" x="-1565.5879287235439"/>
  </node>
  <node id="54844" label="0101011000" cy:nodeId="22456">
    <graphics z="0.0" y="284.57598445389885" x="-279.7034835331142"/>
  </node>
  <node id="54843" label="0101010010" cy:nodeId="22457">
    <graphics z="0.0" y="246.9525103328051" x="-187.38655848428607"/>
  </node>
  <node id="54842" label="1101011000" cy:nodeId="22458">
    <graphics z="0.0" y="-221.17308475996833" x="-1295.8598670475185"/>
  </node>
  <node id="54841" label="1101010010" cy:nodeId="22459">
    <graphics z="0.0" y="182.26913020585198" x="-1406.581870984286"/>
  </node>
  <node id="54840" label="0001011000" cy:nodeId="22460">
    <graphics z="0.0" y="137.9775347468676" x="-289.33379359170794"/>
  </node>
  <node id="54839" label="0001010010" cy:nodeId="22461">
    <graphics z="0.0" y="166.11651179764885" x="-213.23186488077044"/>
  </node>
  <node id="54838" label="1001011000" cy:nodeId="22462">
    <graphics z="0.0" y="-227.17992069746833" x="-1512.0106734745204"/>
  </node>
  <node id="54837" label="1001010010" cy:nodeId="22463">
    <graphics z="0.0" y="111.79241511796135" x="-1509.1225203983486"/>
  </node>
  <node id="54836" label="0110011000" cy:nodeId="22464">
    <graphics z="0.0" y="-8.85452702071052" x="-346.58357996866107"/>
  </node>
  <node id="54835" label="0110010010" cy:nodeId="22465">
    <graphics z="0.0" y="2.9526324031176046" x="-398.81739039346576"/>
  </node>
  <node id="54834" label="0110010000" cy:nodeId="22466">
    <graphics z="0.0" y="-11.563541913288645" x="-633.5675429813564"/>
  </node>
  <node id="54833" label="0111110000" cy:nodeId="22467">
    <graphics z="0.0" y="-2.2800030949292704" x="-660.352592419833"/>
  </node>
  <node id="54832" label="1110011000" cy:nodeId="22468">
    <graphics z="0.0" y="-5.414139294880442" x="-1281.2203673832119"/>
  </node>
  <node id="54831" label="1110010010" cy:nodeId="22469">
    <graphics z="0.0" y="153.35232112382073" x="-1250.4956054203212"/>
  </node>
  <node id="54830" label="1110010000" cy:nodeId="22470">
    <graphics z="0.0" y="236.28939387772698" x="-1302.9791030399501"/>
  </node>
  <node id="54829" label="1111110000" cy:nodeId="22471">
    <graphics z="0.0" y="38.906619524699636" x="-1216.1349563114345"/>
  </node>
  <node id="54828" label="0010011000" cy:nodeId="22472">
    <graphics z="0.0" y="-257.6758256199537" x="-435.1594237796962"/>
  </node>
  <node id="54827" label="0010010010" cy:nodeId="22473">
    <graphics z="0.0" y="-95.99745609785896" x="-498.1763438694179"/>
  </node>
  <node id="54826" label="0010010000" cy:nodeId="22474">
    <graphics z="0.0" y="-325.567898297566" x="-620.4744796268642"/>
  </node>
  <node id="54825" label="0011110000" cy:nodeId="22475">
    <graphics z="0.0" y="-121.3214154484449" x="-559.059867810458"/>
  </node>
  <node id="54824" label="1010011000" cy:nodeId="22476">
    <graphics z="0.0" y="8.267695879680105" x="-1415.6349715702236"/>
  </node>
  <node id="54823" label="1010010010" cy:nodeId="22477">
    <graphics z="0.0" y="251.7608599421801" x="-1524.0902022831142"/>
  </node>
  <node id="54822" label="1010010000" cy:nodeId="22478">
    <graphics z="0.0" y="143.79998347733635" x="-1608.7502669803798"/>
  </node>
  <node id="54821" label="1011110000" cy:nodeId="22479">
    <graphics z="0.0" y="23.9845156428637" x="-1382.654365491122"/>
  </node>
  <node id="54820" label="0101010000" cy:nodeId="22480">
    <graphics z="0.0" y="237.2318072078051" x="-450.0743960849941"/>
  </node>
  <node id="54819" label="0100011000" cy:nodeId="22481">
    <graphics z="0.0" y="166.86873958085198" x="-453.75718111917377"/>
  </node>
  <node id="54818" label="0100010010" cy:nodeId="22482">
    <graphics z="0.0" y="109.51949641678948" x="-393.37232203409076"/>
  </node>
  <node id="54817" label="0100010000" cy:nodeId="22483">
    <graphics z="0.0" y="150.70122859452385" x="-537.5751189701259"/>
  </node>
  <node id="54816" label="0101110000" cy:nodeId="22484">
    <graphics z="0.0" y="185.55684993241448" x="-603.6360244266689"/>
  </node>
  <node id="54815" label="1101010000" cy:nodeId="22485">
    <graphics z="0.0" y="-57.0446591618238" x="-1551.8190993778408"/>
  </node>
  <node id="54814" label="1100011000" cy:nodeId="22486">
    <graphics z="0.0" y="-306.7979321720777" x="-1342.4941625110805"/>
  </node>
  <node id="54813" label="1100010010" cy:nodeId="22487">
    <graphics z="0.0" y="-73.1201215031324" x="-1494.6459426395595"/>
  </node>
  <node id="54812" label="1100010000" cy:nodeId="22488">
    <graphics z="0.0" y="-39.6946950199781" x="-1480.0923995487392"/>
  </node>
  <node id="54811" label="1101110000" cy:nodeId="22489">
    <graphics z="0.0" y="-101.49684574629646" x="-1263.7125014774501"/>
  </node>
  <node id="54810" label="0001010000" cy:nodeId="22490">
    <graphics z="0.0" y="-45.646244550007395" x="-296.30625147745013"/>
  </node>
  <node id="54809" label="0000011000" cy:nodeId="22491">
    <graphics z="0.0" y="-63.12797977949958" x="-528.4592017643154"/>
  </node>
  <node id="54808" label="0000010010" cy:nodeId="22492">
    <graphics z="0.0" y="-97.39667179610115" x="-418.47248835489154"/>
  </node>
  <node id="54807" label="0000010000" cy:nodeId="22493">
    <graphics z="0.0" y="-139.1670727970777" x="-450.1203250400722"/>
  </node>
  <node id="54806" label="0011100000" cy:nodeId="22494">
    <graphics z="0.0" y="-183.24968769575935" x="-535.319763135165"/>
  </node>
  <node id="54805" label="0001110000" cy:nodeId="22495">
    <graphics z="0.0" y="-119.62054111983161" x="-628.5408858768642"/>
  </node>
  <node id="54804" label="1001010000" cy:nodeId="22496">
    <graphics z="0.0" y="-89.40786602522712" x="-1645.721733044833"/>
  </node>
  <node id="54803" label="1000011000" cy:nodeId="22497">
    <graphics z="0.0" y="-264.3415112736402" x="-1546.5717391483486"/>
  </node>
  <node id="54802" label="1000010010" cy:nodeId="22498">
    <graphics z="0.0" y="17.45547816727776" x="-1644.7994918338954"/>
  </node>
  <node id="54801" label="1000010000" cy:nodeId="22499">
    <graphics z="0.0" y="-28.31467106367927" x="-1569.1826400272548"/>
  </node>
  <node id="54800" label="1011100000" cy:nodeId="22500">
    <graphics z="0.0" y="-34.19453861739021" x="-1499.0629195682704"/>
  </node>
  <node id="54799" label="1001110000" cy:nodeId="22501">
    <graphics z="0.0" y="-109.03812077071052" x="-1480.5500411503017"/>
  </node>
  <node id="54798" label="0110110000" cy:nodeId="22502">
    <graphics z="0.0" y="-34.99904301192146" x="-775.8331222049892"/>
  </node>
  <node id="54797" label="1110110000" cy:nodeId="22503">
    <graphics z="0.0" y="-14.55871632124763" x="-1180.3066482059658"/>
  </node>
  <node id="54796" label="0010110000" cy:nodeId="22504">
    <graphics z="0.0" y="-196.64542057539802" x="-783.2964095585048"/>
  </node>
  <node id="54795" label="1010110000" cy:nodeId="22505">
    <graphics z="0.0" y="-102.15443089033943" x="-1371.414115857333"/>
  </node>
  <node id="54794" label="0110100000" cy:nodeId="22506">
    <graphics z="0.0" y="-219.7996526005445" x="-679.6871261112392"/>
  </node>
  <node id="54793" label="0100110000" cy:nodeId="22507">
    <graphics z="0.0" y="167.7331499812426" x="-759.0620345585048"/>
  </node>
  <node id="54792" label="0100100000" cy:nodeId="22508">
    <graphics z="0.0" y="-91.4746136906324" x="-699.0613021366298"/>
  </node>
  <node id="54791" label="1110100000" cy:nodeId="22509">
    <graphics z="0.0" y="-107.78132298018318" x="-1334.112424802035"/>
  </node>
  <node id="54790" label="1100110000" cy:nodeId="22510">
    <graphics z="0.0" y="-76.1015267613111" x="-1412.7903747074306"/>
  </node>
</graph>
