# Supplementary material
Source: publisher figshare collection journal article supplement (https://springernature.figshare.com/ndownloader/files/17562821)
Supplement: Supplementary file 1 [file 17562821 › CytoscapeSession-2018_09_25-21_15/views/26668-68457-STG%2C+Model+2.xgmml]

<?xml version="1.0" encoding="UTF-8" standalone="yes"?>
<graph id="68457" label="STG, Model 2" cy:view="1" cy:networkId="26668" cy:visualStyle="Directed" cy:rendererId="org.cytoscape.ding" cy:documentVersion="3.0" xmlns:dc="http://purl.org/dc/elements/1.1/" xmlns:xlink="http://www.w3.org/1999/xlink" xmlns:rdf="http://www.w3.org/1999/02/22-rdf-syntax-ns#" xmlns:cy="http://www.cytoscape.org" xmlns="http://www.cs.rpi.edu/XGMML">
  <graphics>
    <att name="NETWORK_TITLE" value="STG, Model 2" type="string" cy:type="String"/>
    <att name="NETWORK_EDGE_SELECTION" value="true" type="string" cy:type="String"/>
    <att name="NETWORK_WIDTH" value="1193.0" type="string" cy:type="String"/>
    <att name="NETWORK_NODE_SELECTION" value="true" type="string" cy:type="String"/>
    <att name="NETWORK_CENTER_Z_LOCATION" value="0.0" type="string" cy:type="String"/>
    <att name="NETWORK_CENTER_X_LOCATION" value="-3.53448486328125" type="string" cy:type="String"/>
    <att name="NETWORK_SCALE_FACTOR" value="0.4724085914957395" type="string" cy:type="String"/>
    <att name="NETWORK_DEPTH" value="0.0" type="string" cy:type="String"/>
    <att name="NETWORK_HEIGHT" value="501.0" type="string" cy:type="String"/>
    <att name="NETWORK_CENTER_Y_LOCATION" value="36.905426025390625" type="string" cy:type="String"/>
  </graphics>
  <node id="69482" label="0111111111" cy:nodeId="26678">
    <graphics z="0.0" y="-136.1495922964532" x="616.1541683385149"/>
  </node>
  <node id="69481" label="1111111111" cy:nodeId="26679">
    <graphics z="0.0" y="-89.59239472565241" x="1449.0491115758196"/>
  </node>
  <node id="69480" label="0011111111" cy:nodeId="26680">
    <graphics z="0.0" y="-34.13088883575983" x="746.3580257603899"/>
  </node>
  <node id="69479" label="1011111111" cy:nodeId="26681">
    <graphics z="0.0" y="-61.15099610504694" x="1236.4499904820696"/>
  </node>
  <node id="69478" label="0101111111" cy:nodeId="26682">
    <graphics z="0.0" y="39.25474272551946" x="538.2002498814836"/>
  </node>
  <node id="69477" label="1101111111" cy:nodeId="26683">
    <graphics z="0.0" y="-26.962168590398505" x="1247.5560848424211"/>
  </node>
  <node id="69476" label="0001111111" cy:nodeId="26684">
    <graphics z="0.0" y="32.826535328058526" x="747.5028011510149"/>
  </node>
  <node id="69475" label="1001111111" cy:nodeId="26685">
    <graphics z="0.0" y="62.52173338714056" x="1073.1474010655656"/>
  </node>
  <node id="69474" label="0110111111" cy:nodeId="26686">
    <graphics z="0.0" y="34.22003660979681" x="455.9495174596086"/>
  </node>
  <node id="69473" label="1110111111" cy:nodeId="26687">
    <graphics z="0.0" y="-258.328257457586" x="1402.154702396132"/>
  </node>
  <node id="69472" label="0010111111" cy:nodeId="26688">
    <graphics z="0.0" y="44.80006895842962" x="678.841210574843"/>
  </node>
  <node id="69471" label="1010111111" cy:nodeId="26689">
    <graphics z="0.0" y="-70.9912442129571" x="1148.8493282506242"/>
  </node>
  <node id="69470" label="0100111111" cy:nodeId="26690">
    <graphics z="0.0" y="287.97807799163274" x="460.84850427601486"/>
  </node>
  <node id="69469" label="1100111111" cy:nodeId="26691">
    <graphics z="0.0" y="-258.749400035711" x="1283.7004177281633"/>
  </node>
  <node id="69468" label="0000111111" cy:nodeId="26692">
    <graphics z="0.0" y="174.48158751311712" x="615.9741756627336"/>
  </node>
  <node id="69467" label="1000111111" cy:nodeId="26693">
    <graphics z="0.0" y="-36.44909562286921" x="1275.1014187047258"/>
  </node>
  <node id="69466" label="0111111011" cy:nodeId="26694">
    <graphics z="0.0" y="-146.21938599762507" x="486.52538415882736"/>
  </node>
  <node id="69465" label="0111101111" cy:nodeId="26695">
    <graphics z="0.0" y="-161.0802334707696" x="369.68981286976486"/>
  </node>
  <node id="69464" label="1111111011" cy:nodeId="26696">
    <graphics z="0.0" y="-34.51341523346491" x="1443.6475612828508"/>
  </node>
  <node id="69463" label="1111101111" cy:nodeId="26697">
    <graphics z="0.0" y="-212.14339722809382" x="1320.0407497594133"/>
  </node>
  <node id="69462" label="1011111011" cy:nodeId="26698">
    <graphics z="0.0" y="145.17604552092962" x="1313.749428958632"/>
  </node>
  <node id="69461" label="1011101111" cy:nodeId="26699">
    <graphics z="0.0" y="-92.92087830719538" x="1213.2181179234758"/>
  </node>
  <node id="69460" label="0011111011" cy:nodeId="26700">
    <graphics z="0.0" y="-185.03588380035944" x="698.4744503209367"/>
  </node>
  <node id="69459" label="0011101111" cy:nodeId="26701">
    <graphics z="0.0" y="-32.92858018097468" x="525.9410946080461"/>
  </node>
  <node id="69458" label="0101111011" cy:nodeId="26702">
    <graphics z="0.0" y="11.40083800139837" x="491.4598934361711"/>
  </node>
  <node id="69457" label="0101101111" cy:nodeId="26703">
    <graphics z="0.0" y="128.45283995452337" x="287.6581814000383"/>
  </node>
  <node id="69456" label="1101111011" cy:nodeId="26704">
    <graphics z="0.0" y="215.12236510100774" x="1390.2751247594133"/>
  </node>
  <node id="69455" label="1101101111" cy:nodeId="26705">
    <graphics z="0.0" y="-231.26273621735163" x="1204.1585018346086"/>
  </node>
  <node id="69454" label="1011101011" cy:nodeId="26706">
    <graphics z="0.0" y="2.6559458810370415" x="1199.378564090468"/>
  </node>
  <node id="69453" label="1001111011" cy:nodeId="26707">
    <graphics z="0.0" y="294.12874327483587" x="1185.2521755406633"/>
  </node>
  <node id="69452" label="1001101111" cy:nodeId="26708">
    <graphics z="0.0" y="-69.14679993805476" x="1128.4970180699602"/>
  </node>
  <node id="69451" label="0011101011" cy:nodeId="26709">
    <graphics z="0.0" y="-255.1741284292657" x="549.2394649693742"/>
  </node>
  <node id="69450" label="0001111011" cy:nodeId="26710">
    <graphics z="0.0" y="-100.23865403351374" x="646.024071902968"/>
  </node>
  <node id="69449" label="0001101111" cy:nodeId="26711">
    <graphics z="0.0" y="19.996037586359307" x="553.7525264928117"/>
  </node>
  <node id="69448" label="1111011111" cy:nodeId="26712">
    <graphics z="0.0" y="-54.79461564240046" x="1404.2812893101946"/>
  </node>
  <node id="69447" label="0111011111" cy:nodeId="26713">
    <graphics z="0.0" y="102.05818663421087" x="610.1374752232805"/>
  </node>
  <node id="69446" label="1011011111" cy:nodeId="26714">
    <graphics z="0.0" y="152.5503588754218" x="1359.2070400426164"/>
  </node>
  <node id="69445" label="0011011111" cy:nodeId="26715">
    <graphics z="0.0" y="59.653187854913995" x="707.2897274205461"/>
  </node>
  <node id="69444" label="0110111011" cy:nodeId="26716">
    <graphics z="0.0" y="-76.25243844208308" x="534.5281002232805"/>
  </node>
  <node id="69443" label="0110101111" cy:nodeId="26717">
    <graphics z="0.0" y="-34.565779582830146" x="627.4826595494524"/>
  </node>
  <node id="69442" label="0110101011" cy:nodeId="26718">
    <graphics z="0.0" y="-96.4996384542901" x="471.73616907093674"/>
  </node>
  <node id="69441" label="1110111011" cy:nodeId="26719">
    <graphics z="0.0" y="-49.23516358551569" x="1503.1680080601946"/>
  </node>
  <node id="69440" label="1110101111" cy:nodeId="26720">
    <graphics z="0.0" y="-314.8210553091485" x="1214.0142299840227"/>
  </node>
  <node id="69439" label="1110101011" cy:nodeId="26721">
    <graphics z="0.0" y="-92.89340485748835" x="1382.0444118687883"/>
  </node>
  <node id="69438" label="1010111011" cy:nodeId="26722">
    <graphics z="0.0" y="96.02161131682806" x="1423.595376224257"/>
  </node>
  <node id="69437" label="1010101111" cy:nodeId="26723">
    <graphics z="0.0" y="-195.628062145086" x="1210.880761356093"/>
  </node>
  <node id="69436" label="0010111011" cy:nodeId="26724">
    <graphics z="0.0" y="-169.71747864899226" x="641.250634402968"/>
  </node>
  <node id="69435" label="0010101111" cy:nodeId="26725">
    <graphics z="0.0" y="53.67770872893743" x="570.1548092076555"/>
  </node>
  <node id="69434" label="0101011111" cy:nodeId="26726">
    <graphics z="0.0" y="278.541127308039" x="571.079491824843"/>
  </node>
  <node id="69433" label="1101011111" cy:nodeId="26727">
    <graphics z="0.0" y="-43.479407207341865" x="1345.3706752965227"/>
  </node>
  <node id="69432" label="0111110111" cy:nodeId="26728">
    <graphics z="0.0" y="-78.30776585754938" x="423.1743251988664"/>
  </node>
  <node id="69431" label="1111110111" cy:nodeId="26729">
    <graphics z="0.0" y="147.79793272796087" x="1215.274544925429"/>
  </node>
  <node id="69430" label="1001011111" cy:nodeId="26730">
    <graphics z="0.0" y="127.47475157561712" x="1219.9400570103899"/>
  </node>
  <node id="69429" label="0001011111" cy:nodeId="26731">
    <graphics z="0.0" y="181.06844054046087" x="669.4353573033586"/>
  </node>
  <node id="69428" label="0011110111" cy:nodeId="26732">
    <graphics z="0.0" y="-67.85725297150202" x="675.0974666783586"/>
  </node>
  <node id="69427" label="1011110111" cy:nodeId="26733">
    <graphics z="0.0" y="123.28539763274603" x="1172.3586513707414"/>
  </node>
  <node id="69426" label="0100111011" cy:nodeId="26734">
    <graphics z="0.0" y="22.219052417902276" x="392.49437829945236"/>
  </node>
  <node id="69425" label="0100101111" cy:nodeId="26735">
    <graphics z="0.0" y="206.5839739877265" x="362.212792606093"/>
  </node>
  <node id="69424" label="0100101011" cy:nodeId="26736">
    <graphics z="0.0" y="6.816197498468682" x="201.15402910206467"/>
  </node>
  <node id="69423" label="1100111011" cy:nodeId="26737">
    <graphics z="0.0" y="-41.35955323395319" x="1376.9733364293352"/>
  </node>
  <node id="69422" label="1100101111" cy:nodeId="26738">
    <graphics z="0.0" y="-363.942759410711" x="1193.2738582799211"/>
  </node>
  <node id="69421" label="1100101011" cy:nodeId="26739">
    <graphics z="0.0" y="-88.23379029450007" x="1239.2866756627336"/>
  </node>
  <node id="69420" label="1010101011" cy:nodeId="26740">
    <graphics z="0.0" y="-93.65571107086726" x="1317.2842495152727"/>
  </node>
  <node id="69419" label="1001101011" cy:nodeId="26741">
    <graphics z="0.0" y="40.22991286101751" x="1099.6962978551164"/>
  </node>
  <node id="69418" label="1000111011" cy:nodeId="26742">
    <graphics z="0.0" y="223.8208666879218" x="1290.9489528844133"/>
  </node>
  <node id="69417" label="1000101111" cy:nodeId="26743">
    <graphics z="0.0" y="-236.2327221792657" x="1056.023926944472"/>
  </node>
  <node id="69416" label="1000101011" cy:nodeId="26744">
    <graphics z="0.0" y="-56.571230785222724" x="1116.088135928847"/>
  </node>
  <node id="69415" label="0010101011" cy:nodeId="26745">
    <graphics z="0.0" y="-145.5248593252618" x="518.3788387486711"/>
  </node>
  <node id="69414" label="0001101011" cy:nodeId="26746">
    <graphics z="0.0" y="-142.8693417471368" x="392.1438533971086"/>
  </node>
  <node id="69413" label="0000111011" cy:nodeId="26747">
    <graphics z="0.0" y="21.559132679132745" x="538.0994198033586"/>
  </node>
  <node id="69412" label="0000101111" cy:nodeId="26748">
    <graphics z="0.0" y="187.56111632171087" x="504.72460290882736"/>
  </node>
  <node id="69411" label="0000101011" cy:nodeId="26749">
    <graphics z="0.0" y="31.40028868499212" x="408.37377283070236"/>
  </node>
  <node id="69410" label="0101110111" cy:nodeId="26750">
    <graphics z="0.0" y="50.552662952570245" x="330.69234582874924"/>
  </node>
  <node id="69409" label="0110011111" cy:nodeId="26751">
    <graphics z="0.0" y="239.71901427092962" x="441.8273403355852"/>
  </node>
  <node id="69408" label="1101110111" cy:nodeId="26752">
    <graphics z="0.0" y="79.00064574065618" x="1062.7532741734758"/>
  </node>
  <node id="69407" label="1110011111" cy:nodeId="26753">
    <graphics z="0.0" y="-126.90537537750788" x="1486.852181644179"/>
  </node>
  <node id="69406" label="0001110111" cy:nodeId="26754">
    <graphics z="0.0" y="-30.410052196355537" x="492.02990076038986"/>
  </node>
  <node id="69405" label="0111101011" cy:nodeId="26755">
    <graphics z="0.0" y="-209.8906811636407" x="454.9756405064836"/>
  </node>
  <node id="69404" label="1111101011" cy:nodeId="26756">
    <graphics z="0.0" y="-29.82464684662409" x="1278.812417239882"/>
  </node>
  <node id="69403" label="1001110111" cy:nodeId="26757">
    <graphics z="0.0" y="196.77480040374212" x="957.805825443007"/>
  </node>
  <node id="69402" label="1010011111" cy:nodeId="26758">
    <graphics z="0.0" y="89.34766112151556" x="1347.554848880507"/>
  </node>
  <node id="69401" label="0010011111" cy:nodeId="26759">
    <graphics z="0.0" y="147.85152159514837" x="613.589745731093"/>
  </node>
  <node id="69400" label="0100011111" cy:nodeId="26760">
    <graphics z="0.0" y="357.2080279428046" x="438.99491235706955"/>
  </node>
  <node id="69399" label="1100011111" cy:nodeId="26761">
    <graphics z="0.0" y="-136.28507508453913" x="1264.1753017613664"/>
  </node>
  <node id="69398" label="0101101011" cy:nodeId="26762">
    <graphics z="0.0" y="-23.64512910065241" x="432.26085779163986"/>
  </node>
  <node id="69397" label="0110110111" cy:nodeId="26763">
    <graphics z="0.0" y="91.77678404632024" x="342.62487146351486"/>
  </node>
  <node id="69396" label="1110110111" cy:nodeId="26764">
    <graphics z="0.0" y="-232.89191712555476" x="1290.8787624547258"/>
  </node>
  <node id="69395" label="1101101011" cy:nodeId="26765">
    <graphics z="0.0" y="124.50063811126165" x="1266.7400905797258"/>
  </node>
  <node id="69394" label="1000011111" cy:nodeId="26766">
    <graphics z="0.0" y="53.722855671076104" x="1442.948128909804"/>
  </node>
  <node id="69393" label="0000011111" cy:nodeId="26767">
    <graphics z="0.0" y="290.18977843108587" x="605.5297176549211"/>
  </node>
  <node id="69392" label="0010110111" cy:nodeId="26768">
    <graphics z="0.0" y="84.86679564299993" x="558.2550899693742"/>
  </node>
  <node id="69391" label="1010110111" cy:nodeId="26769">
    <graphics z="0.0" y="75.44185362639837" x="1193.6808559605852"/>
  </node>
  <node id="69390" label="0100110111" cy:nodeId="26770">
    <graphics z="0.0" y="190.32927428069524" x="243.02043268177658"/>
  </node>
  <node id="69389" label="1100110111" cy:nodeId="26771">
    <graphics z="0.0" y="-338.42386902985163" x="1112.484910220839"/>
  </node>
  <node id="69388" label="0000110111" cy:nodeId="26772">
    <graphics z="0.0" y="166.35603819671087" x="475.48592493031174"/>
  </node>
  <node id="69387" label="1000110111" cy:nodeId="26773">
    <graphics z="0.0" y="102.78850279632024" x="965.7328674504533"/>
  </node>
  <node id="69386" label="0111001111" cy:nodeId="26774">
    <graphics z="0.0" y="75.29108153167181" x="557.6524288365617"/>
  </node>
  <node id="69385" label="1111001111" cy:nodeId="26775">
    <graphics z="0.0" y="-171.91266907867976" x="1406.4084255406633"/>
  </node>
  <node id="69384" label="1011001111" cy:nodeId="26776">
    <graphics z="0.0" y="91.01505003753118" x="1338.3616115758196"/>
  </node>
  <node id="69383" label="0011001111" cy:nodeId="26777">
    <graphics z="0.0" y="82.96516905608587" x="659.5819942662492"/>
  </node>
  <node id="69382" label="0101001111" cy:nodeId="26778">
    <graphics z="0.0" y="266.22151671233587" x="418.3158046910539"/>
  </node>
  <node id="69381" label="1101001111" cy:nodeId="26779">
    <graphics z="0.0" y="56.987973316339776" x="1235.6370479771867"/>
  </node>
  <node id="69380" label="0001001111" cy:nodeId="26780">
    <graphics z="0.0" y="206.971791370539" x="570.1443721959367"/>
  </node>
  <node id="69379" label="0111110011" cy:nodeId="26781">
    <graphics z="0.0" y="-110.19142045197077" x="463.0791561314836"/>
  </node>
  <node id="69378" label="0111100111" cy:nodeId="26782">
    <graphics z="0.0" y="-151.38717164215632" x="241.10873529408127"/>
  </node>
  <node id="69377" label="1001001111" cy:nodeId="26783">
    <graphics z="0.0" y="40.38227186980657" x="1205.3486110875383"/>
  </node>
  <node id="69376" label="1111110011" cy:nodeId="26784">
    <graphics z="0.0" y="214.23093138518743" x="1053.2575008580461"/>
  </node>
  <node id="69375" label="1111100111" cy:nodeId="26785">
    <graphics z="0.0" y="-91.39280976471491" x="1162.2421199986711"/>
  </node>
  <node id="69374" label="1011110011" cy:nodeId="26786">
    <graphics z="0.0" y="321.989857776789" x="1181.007699222304"/>
  </node>
  <node id="69373" label="1011100111" cy:nodeId="26787">
    <graphics z="0.0" y="15.465851886896417" x="1011.1339990803972"/>
  </node>
  <node id="69372" label="0011110011" cy:nodeId="26788">
    <graphics z="0.0" y="-253.48995484528132" x="660.9320919224992"/>
  </node>
  <node id="69371" label="0011100111" cy:nodeId="26789">
    <graphics z="0.0" y="-63.01801766571589" x="420.09403345081955"/>
  </node>
  <node id="69370" label="1011101110" cy:nodeId="26790">
    <graphics z="0.0" y="-193.56012238678522" x="-188.14566686656326"/>
  </node>
  <node id="69369" label="0011101110" cy:nodeId="26791">
    <graphics z="0.0" y="-12.167170421453193" x="-1062.6256778528914"/>
  </node>
  <node id="69368" label="0111111101" cy:nodeId="26792">
    <graphics z="0.0" y="-230.2086743277032" x="308.79576990101486"/>
  </node>
  <node id="69367" label="1111111101" cy:nodeId="26793">
    <graphics z="0.0" y="-242.53989686188288" x="1226.3232357213274"/>
  </node>
  <node id="69366" label="0101110011" cy:nodeId="26794">
    <graphics z="0.0" y="3.267949207453057" x="303.87084314320236"/>
  </node>
  <node id="69365" label="0101100111" cy:nodeId="26795">
    <graphics z="0.0" y="63.522328479913995" x="73.38310358021408"/>
  </node>
  <node id="69364" label="0110001111" cy:nodeId="26796">
    <graphics z="0.0" y="242.4467669564765" x="585.0205928990617"/>
  </node>
  <node id="69363" label="1101110011" cy:nodeId="26797">
    <graphics z="0.0" y="250.96518431487493" x="1242.6060421178117"/>
  </node>
  <node id="69362" label="1101100111" cy:nodeId="26798">
    <graphics z="0.0" y="82.61820708098821" x="1012.1961757848039"/>
  </node>
  <node id="69361" label="0011111101" cy:nodeId="26799">
    <graphics z="0.0" y="-199.4102353018243" x="590.9985592076555"/>
  </node>
  <node id="69360" label="1110001111" cy:nodeId="26800">
    <graphics z="0.0" y="-227.89951600250788" x="1395.988656253554"/>
  </node>
  <node id="69359" label="1011111101" cy:nodeId="26801">
    <graphics z="0.0" y="-93.92730988678522" x="1198.9668361851946"/>
  </node>
  <node id="69358" label="1011100011" cy:nodeId="26802">
    <graphics z="0.0" y="188.03055296721868" x="1030.965821475722"/>
  </node>
  <node id="69357" label="1001110011" cy:nodeId="26803">
    <graphics z="0.0" y="351.04536925139837" x="1078.8367244908586"/>
  </node>
  <node id="69356" label="1001100111" cy:nodeId="26804">
    <graphics z="0.0" y="103.46208678069524" x="1085.8769619176164"/>
  </node>
  <node id="69355" label="0011100011" cy:nodeId="26805">
    <graphics z="0.0" y="-303.3649548452813" x="422.9072048375383"/>
  </node>
  <node id="69354" label="0001110011" cy:nodeId="26806">
    <graphics z="0.0" y="-161.21388520416804" x="502.12728235218674"/>
  </node>
  <node id="69353" label="0001100111" cy:nodeId="26807">
    <graphics z="0.0" y="84.0224505502265" x="350.32564660999924"/>
  </node>
  <node id="69352" label="1010001111" cy:nodeId="26808">
    <graphics z="0.0" y="-57.76963319000788" x="1321.0806057164446"/>
  </node>
  <node id="69351" label="0010001111" cy:nodeId="26809">
    <graphics z="0.0" y="210.57942686858587" x="545.6335384557024"/>
  </node>
  <node id="69350" label="1111010111" cy:nodeId="26810">
    <graphics z="0.0" y="41.56112776580267" x="1258.335610599257"/>
  </node>
  <node id="69349" label="0111010111" cy:nodeId="26811">
    <graphics z="0.0" y="115.91818724456243" x="459.46044275257736"/>
  </node>
  <node id="69348" label="0011010111" cy:nodeId="26812">
    <graphics z="0.0" y="125.92822752776556" x="557.6153499791399"/>
  </node>
  <node id="69347" label="0101111101" cy:nodeId="26813">
    <graphics z="0.0" y="-39.18339814362116" x="291.1840145299211"/>
  </node>
  <node id="69346" label="1011010111" cy:nodeId="26814">
    <graphics z="0.0" y="201.7327319222968" x="1324.121712894179"/>
  </node>
  <node id="69345" label="1101111101" cy:nodeId="26815">
    <graphics z="0.0" y="49.44513426604681" x="1230.9424526402727"/>
  </node>
  <node id="69344" label="0001111101" cy:nodeId="26816">
    <graphics z="0.0" y="-55.14440812286921" x="526.1100399205461"/>
  </node>
  <node id="69343" label="0100001111" cy:nodeId="26817">
    <graphics z="0.0" y="328.633656604914" x="322.3272030064836"/>
  </node>
  <node id="69342" label="1001111101" cy:nodeId="26818">
    <graphics z="0.0" y="-115.19665803131647" x="1132.1442806432024"/>
  </node>
  <node id="69341" label="1100001111" cy:nodeId="26819">
    <graphics z="0.0" y="-214.82546509918757" x="1112.9729549596086"/>
  </node>
  <node id="69340" label="0110110011" cy:nodeId="26820">
    <graphics z="0.0" y="-53.571122066350654" x="384.22094079945236"/>
  </node>
  <node id="69339" label="0110100111" cy:nodeId="26821">
    <graphics z="0.0" y="129.56184874358587" x="318.93209955189377"/>
  </node>
  <node id="69338" label="0110100011" cy:nodeId="26822">
    <graphics z="0.0" y="-32.7195156973321" x="240.60028955433518"/>
  </node>
  <node id="69337" label="1110110011" cy:nodeId="26823">
    <graphics z="0.0" y="5.835701091913506" x="1155.5660946080461"/>
  </node>
  <node id="69336" label="1110100111" cy:nodeId="26824">
    <graphics z="0.0" y="-87.07535828766413" x="1255.643716068007"/>
  </node>
  <node id="69335" label="1000001111" cy:nodeId="26825">
    <graphics z="0.0" y="114.24063597503118" x="1092.2858440587297"/>
  </node>
  <node id="69334" label="0000001111" cy:nodeId="26826">
    <graphics z="0.0" y="302.5504351693671" x="468.1661922642961"/>
  </node>
  <node id="69333" label="0110101110" cy:nodeId="26827">
    <graphics z="0.0" y="-55.12679566559382" x="-1020.5204532435164"/>
  </node>
  <node id="69332" label="0100101110" cy:nodeId="26828">
    <graphics z="0.0" y="45.60446654143743" x="-1164.9252841761336"/>
  </node>
  <node id="69331" label="1110101110" cy:nodeId="26829">
    <graphics z="0.0" y="-51.44234742340632" x="-66.84052160289139"/>
  </node>
  <node id="69330" label="1110100011" cy:nodeId="26830">
    <graphics z="0.0" y="-25.069374935002998" x="1121.8461467931047"/>
  </node>
  <node id="69329" label="1010110011" cy:nodeId="26831">
    <graphics z="0.0" y="169.34499083342962" x="1164.7992794224992"/>
  </node>
  <node id="69328" label="1010100111" cy:nodeId="26832">
    <graphics z="0.0" y="37.06272612395696" x="1141.012612552382"/>
  </node>
  <node id="69327" label="0101010111" cy:nodeId="26833">
    <graphics z="0.0" y="181.56520567717962" x="340.9834072301164"/>
  </node>
  <node id="69326" label="0010110011" cy:nodeId="26834">
    <graphics z="0.0" y="-111.66749848541804" x="585.7095272252336"/>
  </node>
  <node id="69325" label="0010100111" cy:nodeId="26835">
    <graphics z="0.0" y="180.95845518889837" x="417.3870327183977"/>
  </node>
  <node id="69324" label="1101010111" cy:nodeId="26836">
    <graphics z="0.0" y="98.51881132903509" x="1125.1936580846086"/>
  </node>
  <node id="69323" label="1100101110" cy:nodeId="26837">
    <graphics z="0.0" y="85.20697508635931" x="-75.80667760875076"/>
  </node>
  <node id="69322" label="1010101110" cy:nodeId="26838">
    <graphics z="0.0" y="-9.07908143219538" x="-199.7216556360945"/>
  </node>
  <node id="69321" label="1001101110" cy:nodeId="26839">
    <graphics z="0.0" y="48.23871336760931" x="-184.07941320445389"/>
  </node>
  <node id="69320" label="1000101110" cy:nodeId="26840">
    <graphics z="0.0" y="145.49399290862493" x="-128.90421178843826"/>
  </node>
  <node id="69319" label="0010101110" cy:nodeId="26841">
    <graphics z="0.0" y="-142.52343262848444" x="-1048.9689548304304"/>
  </node>
  <node id="69318" label="0001101110" cy:nodeId="26842">
    <graphics z="0.0" y="-27.835139171453193" x="-1155.3184116175398"/>
  </node>
  <node id="69317" label="0000101110" cy:nodeId="26843">
    <graphics z="0.0" y="-149.25268830475397" x="-1322.3270709803328"/>
  </node>
  <node id="69316" label="0001010111" cy:nodeId="26844">
    <graphics z="0.0" y="146.86613951507024" x="497.98763391468674"/>
  </node>
  <node id="69315" label="1001010111" cy:nodeId="26845">
    <graphics z="0.0" y="306.3654986459296" x="1195.0625087926164"/>
  </node>
  <node id="69314" label="0110111101" cy:nodeId="26846">
    <graphics z="0.0" y="-7.227267162175849" x="466.1064998814836"/>
  </node>
  <node id="69313" label="1110111101" cy:nodeId="26847">
    <graphics z="0.0" y="-306.33683289703913" x="1264.1434108922258"/>
  </node>
  <node id="69312" label="0111101110" cy:nodeId="26848">
    <graphics z="0.0" y="119.72153197112493" x="-1079.0510623743758"/>
  </node>
  <node id="69311" label="1111101110" cy:nodeId="26849">
    <graphics z="0.0" y="-85.0744732778985" x="-79.23865392711014"/>
  </node>
  <node id="69310" label="0100110011" cy:nodeId="26850">
    <graphics z="0.0" y="-31.14035309967585" x="253.05001184437424"/>
  </node>
  <node id="69309" label="0100100111" cy:nodeId="26851">
    <graphics z="0.0" y="255.71944151702337" x="194.29170724842697"/>
  </node>
  <node id="69308" label="0100100011" cy:nodeId="26852">
    <graphics z="0.0" y="95.20212279143743" x="102.66410181019455"/>
  </node>
  <node id="69307" label="0010111101" cy:nodeId="26853">
    <graphics z="0.0" y="72.3544818002265" x="617.5048458287492"/>
  </node>
  <node id="69306" label="1100110011" cy:nodeId="26854">
    <graphics z="0.0" y="-11.256421939702705" x="1220.0396511266008"/>
  </node>
  <node id="69305" label="1100100111" cy:nodeId="26855">
    <graphics z="0.0" y="-83.45430268463679" x="954.626626224257"/>
  </node>
  <node id="69304" label="1010111101" cy:nodeId="26856">
    <graphics z="0.0" y="-292.886851207586" x="1129.7609798619524"/>
  </node>
  <node id="69303" label="1100100011" cy:nodeId="26857">
    <graphics z="0.0" y="-30.659808055730537" x="1049.0818454930559"/>
  </node>
  <node id="69302" label="1010100011" cy:nodeId="26858">
    <graphics z="0.0" y="119.63037596526556" x="1120.359635562636"/>
  </node>
  <node id="69301" label="1001100011" cy:nodeId="26859">
    <graphics z="0.0" y="242.11569701018743" x="982.7155410954729"/>
  </node>
  <node id="69300" label="1000110011" cy:nodeId="26860">
    <graphics z="0.0" y="204.65706358733587" x="1143.1814052769914"/>
  </node>
  <node id="69299" label="1000100111" cy:nodeId="26861">
    <graphics z="0.0" y="-3.7479237478692085" x="982.1401884267107"/>
  </node>
  <node id="69298" label="1000100011" cy:nodeId="26862">
    <graphics z="0.0" y="44.41999159636907" x="1145.5181514928117"/>
  </node>
  <node id="69297" label="0010100011" cy:nodeId="26863">
    <graphics z="0.0" y="-139.04223145660944" x="417.1117641637102"/>
  </node>
  <node id="69296" label="0001100011" cy:nodeId="26864">
    <graphics z="0.0" y="-120.35063447174616" x="280.20559808705"/>
  </node>
  <node id="69295" label="0000110011" cy:nodeId="26865">
    <graphics z="0.0" y="-63.28461541351862" x="263.65481683705"/>
  </node>
  <node id="69294" label="0000100111" cy:nodeId="26866">
    <graphics z="0.0" y="265.8458453256171" x="343.0330135533586"/>
  </node>
  <node id="69293" label="0000100011" cy:nodeId="26867">
    <graphics z="0.0" y="55.06526671233587" x="217.1914303014055"/>
  </node>
  <node id="69292" label="0110010111" cy:nodeId="26868">
    <graphics z="0.0" y="252.95766173186712" x="465.833398074843"/>
  </node>
  <node id="69291" label="1110010111" cy:nodeId="26869">
    <graphics z="0.0" y="-37.30311478790827" x="1202.044823856093"/>
  </node>
  <node id="69290" label="1111100011" cy:nodeId="26870">
    <graphics z="0.0" y="4.299875362543389" x="1072.2048427769914"/>
  </node>
  <node id="69289" label="0010010111" cy:nodeId="26871">
    <graphics z="0.0" y="240.2558489877265" x="643.5530636021867"/>
  </node>
  <node id="69288" label="0100111101" cy:nodeId="26872">
    <graphics z="0.0" y="127.6826068002265" x="208.47650930378586"/>
  </node>
  <node id="69287" label="1100111101" cy:nodeId="26873">
    <graphics z="0.0" y="-252.59870423492976" x="1167.4022915074602"/>
  </node>
  <node id="69286" label="0111100011" cy:nodeId="26874">
    <graphics z="0.0" y="-201.1837719839532" x="181.57129308674484"/>
  </node>
  <node id="69285" label="0101101110" cy:nodeId="26875">
    <graphics z="0.0" y="165.18982420745306" x="-1168.4193103602156"/>
  </node>
  <node id="69284" label="1101101110" cy:nodeId="26876">
    <graphics z="0.0" y="96.53876219573431" x="-35.13535192515701"/>
  </node>
  <node id="69283" label="1010010111" cy:nodeId="26877">
    <graphics z="0.0" y="100.58886442962103" x="1262.4912502476946"/>
  </node>
  <node id="69282" label="0000111101" cy:nodeId="26878">
    <graphics z="0.0" y="131.47084532561712" x="459.7443172642961"/>
  </node>
  <node id="69281" label="1000111101" cy:nodeId="26879">
    <graphics z="0.0" y="-114.27853669342585" x="1101.5400249669328"/>
  </node>
  <node id="69280" label="1111011101" cy:nodeId="26880">
    <graphics z="0.0" y="-94.11346711334772" x="1284.318246097304"/>
  </node>
  <node id="69279" label="1111011011" cy:nodeId="26881">
    <graphics z="0.0" y="140.56747923674993" x="1394.099526614882"/>
  </node>
  <node id="69278" label="0111011101" cy:nodeId="26882">
    <graphics z="0.0" y="-107.96071328339167" x="448.40352746937424"/>
  </node>
  <node id="69277" label="0111011011" cy:nodeId="26883">
    <graphics z="0.0" y="-58.04395188507624" x="628.7073909947649"/>
  </node>
  <node id="69276" label="0100010111" cy:nodeId="26884">
    <graphics z="0.0" y="364.9113665658515" x="297.1950237462297"/>
  </node>
  <node id="69275" label="1100010111" cy:nodeId="26885">
    <graphics z="0.0" y="-36.33171357330866" x="932.2731182286516"/>
  </node>
  <node id="69274" label="1101100011" cy:nodeId="26886">
    <graphics z="0.0" y="237.95920286956243" x="970.0325100133196"/>
  </node>
  <node id="69273" label="1011011101" cy:nodeId="26887">
    <graphics z="0.0" y="-3.7318428915459663" x="1172.7709285924211"/>
  </node>
  <node id="69272" label="1011011011" cy:nodeId="26888">
    <graphics z="0.0" y="289.8316851693671" x="1402.7120144078508"/>
  </node>
  <node id="69271" label="0101100011" cy:nodeId="26889">
    <graphics z="0.0" y="2.571171863703057" x="201.8431293675676"/>
  </node>
  <node id="69270" label="0000010111" cy:nodeId="26890">
    <graphics z="0.0" y="342.958851917414" x="502.2807857701555"/>
  </node>
  <node id="69269" label="0011011101" cy:nodeId="26891">
    <graphics z="0.0" y="16.62893400969915" x="581.3867733189836"/>
  </node>
  <node id="69268" label="0011011011" cy:nodeId="26892">
    <graphics z="0.0" y="-122.78826798615046" x="742.3319637486711"/>
  </node>
  <node id="69267" label="1000010111" cy:nodeId="26893">
    <graphics z="0.0" y="212.28195677581243" x="1351.4015590855852"/>
  </node>
  <node id="69266" label="0111111110" cy:nodeId="26894">
    <graphics z="0.0" y="-18.275111095281318" x="-1182.886458187364"/>
  </node>
  <node id="69265" label="1111111110" cy:nodeId="26895">
    <graphics z="0.0" y="-232.96703232941218" x="-229.49124792125076"/>
  </node>
  <node id="69264" label="0011111110" cy:nodeId="26896">
    <graphics z="0.0" y="-129.73686494049616" x="-1221.5516574671492"/>
  </node>
  <node id="69263" label="1011111110" cy:nodeId="26897">
    <graphics z="0.0" y="-137.55482758698054" x="-348.80167272593826"/>
  </node>
  <node id="69262" label="0101011101" cy:nodeId="26898">
    <graphics z="0.0" y="170.03317747893743" x="415.8911373326555"/>
  </node>
  <node id="69261" label="0101011011" cy:nodeId="26899">
    <graphics z="0.0" y="182.13234434905462" x="567.931786746718"/>
  </node>
  <node id="69260" label="1101011101" cy:nodeId="26900">
    <graphics z="0.0" y="-19.21660699066706" x="1390.3933498570696"/>
  </node>
  <node id="69259" label="1101011011" cy:nodeId="26901">
    <graphics z="0.0" y="302.01225767913274" x="1345.1110927769914"/>
  </node>
  <node id="69258" label="0001011101" cy:nodeId="26902">
    <graphics z="0.0" y="111.60693846526556" x="662.8580867955461"/>
  </node>
  <node id="69257" label="0001011011" cy:nodeId="26903">
    <graphics z="0.0" y="84.583119495539" x="743.0280086705461"/>
  </node>
  <node id="69256" label="1001011101" cy:nodeId="26904">
    <graphics z="0.0" y="-61.17125214752741" x="1196.3296901891008"/>
  </node>
  <node id="69255" label="1001011011" cy:nodeId="26905">
    <graphics z="0.0" y="389.3814898568671" x="1351.5203640172258"/>
  </node>
  <node id="69254" label="0101111110" cy:nodeId="26906">
    <graphics z="0.0" y="116.16241942229681" x="-1285.5719821741804"/>
  </node>
  <node id="69253" label="1101111110" cy:nodeId="26907">
    <graphics z="0.0" y="-55.47824372467585" x="-195.45809057261795"/>
  </node>
  <node id="69252" label="0001111110" cy:nodeId="26908">
    <graphics z="0.0" y="-123.21031464752741" x="-1198.687109737657"/>
  </node>
  <node id="69251" label="1001111110" cy:nodeId="26909">
    <graphics z="0.0" y="83.07446776214056" x="-275.2408664515242"/>
  </node>
  <node id="69250" label="0111101101" cy:nodeId="26910">
    <graphics z="0.0" y="-299.24071778473444" x="337.1439754674211"/>
  </node>
  <node id="69249" label="0110011101" cy:nodeId="26911">
    <graphics z="0.0" y="152.90266905608587" x="360.3659908482805"/>
  </node>
  <node id="69248" label="0110011011" cy:nodeId="26912">
    <graphics z="0.0" y="112.76131163421087" x="628.0494320103899"/>
  </node>
  <node id="69247" label="1111101101" cy:nodeId="26913">
    <graphics z="0.0" y="-268.301646129461" x="1174.5383388707414"/>
  </node>
  <node id="69246" label="1110011101" cy:nodeId="26914">
    <graphics z="0.0" y="-251.75026978668757" x="1374.2059108922258"/>
  </node>
  <node id="69245" label="1110011011" cy:nodeId="26915">
    <graphics z="0.0" y="14.513699634699151" x="1543.3061306187883"/>
  </node>
  <node id="69244" label="1011101101" cy:nodeId="26916">
    <graphics z="0.0" y="-154.19930543121882" x="1053.547108859755"/>
  </node>
  <node id="69243" label="0010011101" cy:nodeId="26917">
    <graphics z="0.0" y="144.72377501311712" x="451.97640344593674"/>
  </node>
  <node id="69242" label="0010011011" cy:nodeId="26918">
    <graphics z="0.0" y="-25.454871074529365" x="659.8540889928117"/>
  </node>
  <node id="69241" label="0011101101" cy:nodeId="26919">
    <graphics z="0.0" y="-268.126109020086" x="494.74389001820236"/>
  </node>
  <node id="69240" label="1010011101" cy:nodeId="26920">
    <graphics z="0.0" y="-175.8688305777032" x="1332.481087894179"/>
  </node>
  <node id="69239" label="1010011011" cy:nodeId="26921">
    <graphics z="0.0" y="159.51277647796087" x="1523.1716091344133"/>
  </node>
  <node id="69238" label="1110111110" cy:nodeId="26922">
    <graphics z="0.0" y="-99.78281678375788" x="-122.87604406382889"/>
  </node>
  <node id="69237" label="0110111110" cy:nodeId="26923">
    <graphics z="0.0" y="2.3681231576483697" x="-1139.3380344202742"/>
  </node>
  <node id="69236" label="0010111110" cy:nodeId="26924">
    <graphics z="0.0" y="-207.02355660614558" x="-1107.5114963343367"/>
  </node>
  <node id="69235" label="1010111110" cy:nodeId="26925">
    <graphics z="0.0" y="-139.51060380158015" x="-296.3304660608992"/>
  </node>
  <node id="69234" label="0111000111" cy:nodeId="26926">
    <graphics z="0.0" y="76.62653075042181" x="421.2046596715227"/>
  </node>
  <node id="69233" label="1111000111" cy:nodeId="26927">
    <graphics z="0.0" y="-68.51369752106257" x="1225.1276638219133"/>
  </node>
  <node id="69232" label="0100011101" cy:nodeId="26928">
    <graphics z="0.0" y="248.26454649749212" x="346.6322719762102"/>
  </node>
  <node id="69231" label="0100011011" cy:nodeId="26929">
    <graphics z="0.0" y="268.0039263803046" x="397.0788356969133"/>
  </node>
  <node id="69230" label="0101101101" cy:nodeId="26930">
    <graphics z="0.0" y="-33.189638988347724" x="277.300194949843"/>
  </node>
  <node id="69229" label="1101101101" cy:nodeId="26931">
    <graphics z="0.0" y="-161.14559449371882" x="1034.232739658095"/>
  </node>
  <node id="69228" label="1011000111" cy:nodeId="26932">
    <graphics z="0.0" y="-35.6278408926446" x="1167.098031253554"/>
  </node>
  <node id="69227" label="0011000111" cy:nodeId="26933">
    <graphics z="0.0" y="176.8543139535468" x="559.4336178014055"/>
  </node>
  <node id="69226" label="1111110110" cy:nodeId="26934">
    <graphics z="0.0" y="-260.7764538687188" x="-292.16532018687576"/>
  </node>
  <node id="69225" label="0111110110" cy:nodeId="26935">
    <graphics z="0.0" y="34.36703978362493" x="-1252.0696409037337"/>
  </node>
  <node id="69224" label="1100011101" cy:nodeId="26936">
    <graphics z="0.0" y="-204.7936352652032" x="1222.1626369664446"/>
  </node>
  <node id="69223" label="1100011011" cy:nodeId="26937">
    <graphics z="0.0" y="94.90884123626165" x="1469.525277347304"/>
  </node>
  <node id="69222" label="1011101001" cy:nodeId="26938">
    <graphics z="0.0" y="-102.06915558991022" x="959.8870403477922"/>
  </node>
  <node id="69221" label="1001101101" cy:nodeId="26939">
    <graphics z="0.0" y="-189.8960522573907" x="972.3570568272844"/>
  </node>
  <node id="69220" label="0000011101" cy:nodeId="26940">
    <graphics z="0.0" y="305.610219104914" x="487.45211145374924"/>
  </node>
  <node id="69219" label="0000011011" cy:nodeId="26941">
    <graphics z="0.0" y="136.33444701018743" x="574.3903743932024"/>
  </node>
  <node id="69218" label="1000011101" cy:nodeId="26942">
    <graphics z="0.0" y="-236.12600220856257" x="1192.8034298131242"/>
  </node>
  <node id="69217" label="1000011011" cy:nodeId="26943">
    <graphics z="0.0" y="182.35457335296087" x="1470.2883693883196"/>
  </node>
  <node id="69216" label="0011101001" cy:nodeId="26944">
    <graphics z="0.0" y="-239.48571290192194" x="360.65087244007736"/>
  </node>
  <node id="69215" label="0001101101" cy:nodeId="26945">
    <graphics z="0.0" y="-199.22037781891413" x="505.490136356093"/>
  </node>
  <node id="69214" label="0100111110" cy:nodeId="26946">
    <graphics z="0.0" y="20.550297840265557" x="-1261.4917466929182"/>
  </node>
  <node id="69213" label="0011110110" cy:nodeId="26947">
    <graphics z="0.0" y="-75.81673707184382" x="-1378.326170711778"/>
  </node>
  <node id="69212" label="1100111110" cy:nodeId="26948">
    <graphics z="0.0" y="49.16138182464056" x="-156.09830358531326"/>
  </node>
  <node id="69211" label="1011110110" cy:nodeId="26949">
    <graphics z="0.0" y="-201.77436341461726" x="-466.83318975474685"/>
  </node>
  <node id="69210" label="0000111110" cy:nodeId="26950">
    <graphics z="0.0" y="-170.99871720490046" x="-1248.17046907451"/>
  </node>
  <node id="69209" label="1000111110" cy:nodeId="26951">
    <graphics z="0.0" y="-108.70421113190241" x="-162.587500362657"/>
  </node>
  <node id="69208" label="0101000111" cy:nodeId="26952">
    <graphics z="0.0" y="336.1540728646796" x="210.33132478687912"/>
  </node>
  <node id="69207" label="1101000111" cy:nodeId="26953">
    <graphics z="0.0" y="163.98262511077337" x="1034.6897823521867"/>
  </node>
  <node id="69206" label="0101110110" cy:nodeId="26954">
    <graphics z="0.0" y="80.72586546721868" x="-1398.3641727259383"/>
  </node>
  <node id="69205" label="1001000111" cy:nodeId="26955">
    <graphics z="0.0" y="137.73549376311712" x="1145.5657741734758"/>
  </node>
  <node id="69204" label="1101110110" cy:nodeId="26956">
    <graphics z="0.0" y="-82.79661072907038" x="-364.98763158824295"/>
  </node>
  <node id="69203" label="0001000111" cy:nodeId="26957">
    <graphics z="0.0" y="272.41438780608587" x="333.8183376500383"/>
  </node>
  <node id="69202" label="0110101101" cy:nodeId="26958">
    <graphics z="0.0" y="-98.41394128021784" x="346.05033227894455"/>
  </node>
  <node id="69201" label="0110101001" cy:nodeId="26959">
    <graphics z="0.0" y="22.351796253351495" x="397.474511356093"/>
  </node>
  <node id="69200" label="1110101101" cy:nodeId="26960">
    <graphics z="0.0" y="-404.2260540884454" x="1168.023827762343"/>
  </node>
  <node id="69199" label="0001110110" cy:nodeId="26961">
    <graphics z="0.0" y="-30.827708141179755" x="-1434.185873775743"/>
  </node>
  <node id="69198" label="1001110110" cy:nodeId="26962">
    <graphics z="0.0" y="91.00323973479681" x="-466.5665672114119"/>
  </node>
  <node id="69197" label="1110101001" cy:nodeId="26963">
    <graphics z="0.0" y="-286.85795106110163" x="1297.883950443007"/>
  </node>
  <node id="69196" label="1010101101" cy:nodeId="26964">
    <graphics z="0.0" y="-252.87491883453913" x="1120.85598871205"/>
  </node>
  <node id="69195" label="0010101101" cy:nodeId="26965">
    <graphics z="0.0" y="18.33613310637884" x="358.1408016392961"/>
  </node>
  <node id="69194" label="0111111001" cy:nodeId="26966">
    <graphics z="0.0" y="-269.06872071442194" x="424.3995907017961"/>
  </node>
  <node id="69193" label="0111110101" cy:nodeId="26967">
    <graphics z="0.0" y="-168.3127545278985" x="305.66195795033127"/>
  </node>
  <node id="69192" label="1111111001" cy:nodeId="26968">
    <graphics z="0.0" y="24.689797504572198" x="1282.114175052382"/>
  </node>
  <node id="69191" label="1111110101" cy:nodeId="26969">
    <graphics z="0.0" y="-13.270528690190986" x="1013.3003380009905"/>
  </node>
  <node id="69190" label="0011111001" cy:nodeId="26970">
    <graphics z="0.0" y="-286.74669923004694" x="581.5294735142961"/>
  </node>
  <node id="69189" label="0011110101" cy:nodeId="26971">
    <graphics z="0.0" y="-227.32641114410944" x="412.2014858433977"/>
  </node>
  <node id="69188" label="0110000111" cy:nodeId="26972">
    <graphics z="0.0" y="294.97295103850774" x="413.2727596471086"/>
  </node>
  <node id="69187" label="1011111001" cy:nodeId="26973">
    <graphics z="0.0" y="203.6116381722968" x="1141.6733638951555"/>
  </node>
  <node id="69186" label="1011110101" cy:nodeId="26974">
    <graphics z="0.0" y="68.66482268157415" x="959.6307193944231"/>
  </node>
  <node id="69185" label="1110000111" cy:nodeId="26975">
    <graphics z="0.0" y="-156.85912598785944" x="1370.206948489882"/>
  </node>
  <node id="69184" label="0100101101" cy:nodeId="26976">
    <graphics z="0.0" y="78.50142393889837" x="140.70088693592697"/>
  </node>
  <node id="69183" label="0100101001" cy:nodeId="26977">
    <graphics z="0.0" y="-123.62708939728327" x="117.13642236683518"/>
  </node>
  <node id="69182" label="1100101101" cy:nodeId="26978">
    <graphics z="0.0" y="-318.95051087555476" x="945.1759464452043"/>
  </node>
  <node id="69181" label="1010000111" cy:nodeId="26979">
    <graphics z="0.0" y="-59.77553071198054" x="1283.8662807652727"/>
  </node>
  <node id="69180" label="0010000111" cy:nodeId="26980">
    <graphics z="0.0" y="315.328969104914" x="496.02230188343674"/>
  </node>
  <node id="69179" label="0110110110" cy:nodeId="26981">
    <graphics z="0.0" y="123.28564940276556" x="-1048.2579410364851"/>
  </node>
  <node id="69178" label="1110110110" cy:nodeId="26982">
    <graphics z="0.0" y="-153.3568676870782" x="-206.87946203257889"/>
  </node>
  <node id="69177" label="1100101001" cy:nodeId="26983">
    <graphics z="0.0" y="-127.80821503815241" x="1116.0372326085344"/>
  </node>
  <node id="69176" label="1010101001" cy:nodeId="26984">
    <graphics z="0.0" y="-124.23421754059382" x="1159.0311977574602"/>
  </node>
  <node id="69175" label="1001101001" cy:nodeId="26985">
    <graphics z="0.0" y="108.00273619475774" x="974.8434269139543"/>
  </node>
  <node id="69174" label="1000101101" cy:nodeId="26986">
    <graphics z="0.0" y="-241.31640137848444" x="941.7727825352922"/>
  </node>
  <node id="69173" label="1000101001" cy:nodeId="26987">
    <graphics z="0.0" y="-9.631884471746162" x="1016.4075157353655"/>
  </node>
  <node id="69172" label="0010101001" cy:nodeId="26988">
    <graphics z="0.0" y="-102.97438515839167" x="446.4303524205461"/>
  </node>
  <node id="69171" label="0001101001" cy:nodeId="26989">
    <graphics z="0.0" y="-162.2542599600274" x="293.368066043593"/>
  </node>
  <node id="69170" label="0000101101" cy:nodeId="26990">
    <graphics z="0.0" y="17.681096180109307" x="192.37472483608872"/>
  </node>
  <node id="69169" label="0000101001" cy:nodeId="26991">
    <graphics z="0.0" y="50.59601317229681" x="349.4719326207414"/>
  </node>
  <node id="69168" label="0010110110" cy:nodeId="26992">
    <graphics z="0.0" y="27.98286925139837" x="-1208.9477260401472"/>
  </node>
  <node id="69167" label="1010110110" cy:nodeId="26993">
    <graphics z="0.0" y="-206.1517495077569" x="-511.3667667200789"/>
  </node>
  <node id="69166" label="0101111001" cy:nodeId="26994">
    <graphics z="0.0" y="-280.27997864899226" x="359.8903133580461"/>
  </node>
  <node id="69165" label="0101110101" cy:nodeId="26995">
    <graphics z="0.0" y="-26.269278423162177" x="163.33915254566818"/>
  </node>
  <node id="69164" label="1101111001" cy:nodeId="26996">
    <graphics z="0.0" y="321.56389342132024" x="1236.148827762343"/>
  </node>
  <node id="69163" label="1101110101" cy:nodeId="26997">
    <graphics z="0.0" y="64.69667540374212" x="1087.1702358433977"/>
  </node>
  <node id="69162" label="0111101001" cy:nodeId="26998">
    <graphics z="0.0" y="-288.12108887848444" x="279.88243982288986"/>
  </node>
  <node id="69161" label="0111001101" cy:nodeId="26999">
    <graphics z="0.0" y="-31.190604106755927" x="354.81383630726486"/>
  </node>
  <node id="69160" label="0111001011" cy:nodeId="27000">
    <graphics z="0.0" y="-148.65920533356257" x="530.4140255162492"/>
  </node>
  <node id="69159" label="0111001001" cy:nodeId="27001">
    <graphics z="0.0" y="-164.8536938589532" x="388.3867885777727"/>
  </node>
  <node id="69158" label="0001111001" cy:nodeId="27002">
    <graphics z="0.0" y="-231.11347474274226" x="513.5091182896867"/>
  </node>
  <node id="69157" label="0001110101" cy:nodeId="27003">
    <graphics z="0.0" y="-115.42592896637507" x="383.3374569127336"/>
  </node>
  <node id="69156" label="0100000111" cy:nodeId="27004">
    <graphics z="0.0" y="412.3044634896796" x="236.28202173206955"/>
  </node>
  <node id="69155" label="1111101001" cy:nodeId="27005">
    <graphics z="0.0" y="-142.98034180817194" x="1224.0692989537492"/>
  </node>
  <node id="69154" label="1111001101" cy:nodeId="27006">
    <graphics z="0.0" y="-205.78905762848444" x="1165.8876278111711"/>
  </node>
  <node id="69153" label="1111001011" cy:nodeId="27007">
    <graphics z="0.0" y="41.796532734064385" x="1443.4584438512102"/>
  </node>
  <node id="69152" label="1001111001" cy:nodeId="27008">
    <graphics z="0.0" y="338.590443714289" x="1097.1370708653703"/>
  </node>
  <node id="69151" label="1001110101" cy:nodeId="27009">
    <graphics z="0.0" y="48.415524585871026" x="976.0401298711076"/>
  </node>
  <node id="69150" label="1100000111" cy:nodeId="27010">
    <graphics z="0.0" y="-51.39414490875788" x="1275.1729213902727"/>
  </node>
  <node id="69149" label="0011001101" cy:nodeId="27011">
    <graphics z="0.0" y="-50.57789887604304" x="565.4099361607805"/>
  </node>
  <node id="69148" label="0011001011" cy:nodeId="27012">
    <graphics z="0.0" y="-31.03977479157038" x="548.9728939244524"/>
  </node>
  <node id="69147" label="0011001001" cy:nodeId="27013">
    <graphics z="0.0" y="-190.29731263336726" x="458.65306970570236"/>
  </node>
  <node id="69146" label="0100110110" cy:nodeId="27014">
    <graphics z="0.0" y="215.5524340707343" x="-1379.1770236780867"/>
  </node>
  <node id="69145" label="0000000111" cy:nodeId="27015">
    <graphics z="0.0" y="399.0969439584296" x="379.4854519078508"/>
  </node>
  <node id="69144" label="1111001001" cy:nodeId="27016">
    <graphics z="0.0" y="-117.61418427643366" x="1268.3857509801164"/>
  </node>
  <node id="69143" label="1011001101" cy:nodeId="27017">
    <graphics z="0.0" y="-182.371958629461" x="1120.7542354771867"/>
  </node>
  <node id="69142" label="1011001011" cy:nodeId="27018">
    <graphics z="0.0" y="140.0839282113593" x="1392.5296413609758"/>
  </node>
  <node id="69141" label="1011001001" cy:nodeId="27019">
    <graphics z="0.0" y="65.27307616057806" x="1322.331917972304"/>
  </node>
  <node id="69140" label="0111111010" cy:nodeId="27020">
    <graphics z="0.0" y="169.00192747893743" x="-1149.3043201258406"/>
  </node>
  <node id="69139" label="1000000111" cy:nodeId="27021">
    <graphics z="0.0" y="160.92690001311712" x="1080.9294368932024"/>
  </node>
  <node id="69138" label="1111111010" cy:nodeId="27022">
    <graphics z="0.0" y="-305.65512360748835" x="-321.9069812586531"/>
  </node>
  <node id="69137" label="1100110110" cy:nodeId="27023">
    <graphics z="0.0" y="23.090550525812432" x="-254.98815038707107"/>
  </node>
  <node id="69136" label="1011111010" cy:nodeId="27024">
    <graphics z="0.0" y="-364.71642579254694" x="-418.94433286692947"/>
  </node>
  <node id="69135" label="0011111010" cy:nodeId="27025">
    <graphics z="0.0" y="-12.53092469391413" x="-1323.4859302332625"/>
  </node>
  <node id="69134" label="0000110110" cy:nodeId="27026">
    <graphics z="0.0" y="-80.00249756989069" x="-1446.8760440638289"/>
  </node>
  <node id="69133" label="1000110110" cy:nodeId="27027">
    <graphics z="0.0" y="36.00241576018743" x="-352.84961584117264"/>
  </node>
  <node id="69132" label="0110111001" cy:nodeId="27028">
    <graphics z="0.0" y="-61.80761803803034" x="414.56493494007736"/>
  </node>
  <node id="69131" label="0110110101" cy:nodeId="27029">
    <graphics z="0.0" y="129.42879210296087" x="331.41141626331955"/>
  </node>
  <node id="69130" label="0101101001" cy:nodeId="27030">
    <graphics z="0.0" y="-130.529673473211" x="291.497346133925"/>
  </node>
  <node id="69129" label="0101001101" cy:nodeId="27031">
    <graphics z="0.0" y="135.97916136565618" x="356.10286828968674"/>
  </node>
  <node id="69128" label="0101001011" cy:nodeId="27032">
    <graphics z="0.0" y="185.08333311858587" x="403.39061853382736"/>
  </node>
  <node id="69127" label="1110111001" cy:nodeId="27033">
    <graphics z="0.0" y="-222.65586365875788" x="1377.3187038609758"/>
  </node>
  <node id="69126" label="1110110101" cy:nodeId="27034">
    <graphics z="0.0" y="-168.83333863434382" x="1067.3716747472063"/>
  </node>
  <node id="69125" label="1101101001" cy:nodeId="27035">
    <graphics z="0.0" y="50.74238310637884" x="1183.795815677382"/>
  </node>
  <node id="69124" label="1101001101" cy:nodeId="27036">
    <graphics z="0.0" y="-115.46808137116022" x="1188.3879177281633"/>
  </node>
  <node id="69123" label="1101001011" cy:nodeId="27037">
    <graphics z="0.0" y="186.91750059905462" x="1246.8930446812883"/>
  </node>
  <node id="69122" label="0111100110" cy:nodeId="27038">
    <graphics z="0.0" y="199.55167113128118" x="-1139.4127261927351"/>
  </node>
  <node id="69121" label="1111100110" cy:nodeId="27039">
    <graphics z="0.0" y="-254.4332837027032" x="-159.44830968882889"/>
  </node>
  <node id="69120" label="0101111010" cy:nodeId="27040">
    <graphics z="0.0" y="138.95203123870306" x="-1421.2004764368758"/>
  </node>
  <node id="69119" label="0001001101" cy:nodeId="27041">
    <graphics z="0.0" y="49.440724476007745" x="414.40026208851486"/>
  </node>
  <node id="69118" label="0001001011" cy:nodeId="27042">
    <graphics z="0.0" y="-7.970957652898505" x="450.10802576038986"/>
  </node>
  <node id="69117" label="0011100110" cy:nodeId="27043">
    <graphics z="0.0" y="3.2244158822577447" x="-1112.2263706019148"/>
  </node>
  <node id="69116" label="1001001101" cy:nodeId="27044">
    <graphics z="0.0" y="-27.48124970612116" x="954.3833362767473"/>
  </node>
  <node id="69115" label="1001001011" cy:nodeId="27045">
    <graphics z="0.0" y="199.58577452483587" x="1418.005776614882"/>
  </node>
  <node id="69114" label="0010111001" cy:nodeId="27046">
    <graphics z="0.0" y="-305.30630006012507" x="448.00345727894455"/>
  </node>
  <node id="69113" label="0010110101" cy:nodeId="27047">
    <graphics z="0.0" y="-205.6433209341485" x="373.63207361195236"/>
  </node>
  <node id="69112" label="1011100110" cy:nodeId="27048">
    <graphics z="0.0" y="-307.5096768301446" x="-457.1613681605086"/>
  </node>
  <node id="69111" label="1010111001" cy:nodeId="27049">
    <graphics z="0.0" y="75.81457243743353" x="1335.1058132359758"/>
  </node>
  <node id="69110" label="1010110101" cy:nodeId="27050">
    <graphics z="0.0" y="-101.65012635407038" x="1022.307103366591"/>
  </node>
  <node id="69109" label="1101111010" cy:nodeId="27051">
    <graphics z="0.0" y="-161.23755158600397" x="-267.05415990855545"/>
  </node>
  <node id="69108" label="1011101010" cy:nodeId="27052">
    <graphics z="0.0" y="-326.35256470856257" x="-257.96407201793045"/>
  </node>
  <node id="69107" label="1001111010" cy:nodeId="27053">
    <graphics z="0.0" y="-221.44772996124811" x="-428.0926139643416"/>
  </node>
  <node id="69106" label="0011101010" cy:nodeId="27054">
    <graphics z="0.0" y="186.0831957894843" x="-1348.043165951036"/>
  </node>
  <node id="69105" label="0001111010" cy:nodeId="27055">
    <graphics z="0.0" y="-99.27409638580866" x="-1409.2603977015242"/>
  </node>
  <node id="69104" label="1111011110" cy:nodeId="27056">
    <graphics z="0.0" y="-158.4208325308282" x="-333.4659335901961"/>
  </node>
  <node id="69103" label="0111011110" cy:nodeId="27057">
    <graphics z="0.0" y="-86.63947571930476" x="-1072.0222232630476"/>
  </node>
  <node id="69102" label="0100111001" cy:nodeId="27058">
    <graphics z="0.0" y="-89.6070832174737" x="246.4430706212297"/>
  </node>
  <node id="69101" label="0100110101" cy:nodeId="27059">
    <graphics z="0.0" y="103.17429076018743" x="196.4737572381273"/>
  </node>
  <node id="69100" label="1100111001" cy:nodeId="27060">
    <graphics z="0.0" y="-95.91778077301569" x="1293.4472133824602"/>
  </node>
  <node id="69099" label="1100110101" cy:nodeId="27061">
    <graphics z="0.0" y="-236.19352235016413" x="1016.9909221837297"/>
  </node>
  <node id="69098" label="0101100110" cy:nodeId="27062">
    <graphics z="0.0" y="155.28174315276556" x="-1312.649210720323"/>
  </node>
  <node id="69097" label="0011011110" cy:nodeId="27063">
    <graphics z="0.0" y="-268.32953538117" x="-1169.9678790858015"/>
  </node>
  <node id="69096" label="1101100110" cy:nodeId="27064">
    <graphics z="0.0" y="-0.6684216421563178" x="-141.97366979625076"/>
  </node>
  <node id="69095" label="1011011110" cy:nodeId="27065">
    <graphics z="0.0" y="-71.04978455719538" x="-556.1096332361922"/>
  </node>
  <node id="69094" label="0000111001" cy:nodeId="27066">
    <graphics z="0.0" y="-143.48417176422663" x="487.12471887562424"/>
  </node>
  <node id="69093" label="0000110101" cy:nodeId="27067">
    <graphics z="0.0" y="81.62141905608587" x="291.8476803014055"/>
  </node>
  <node id="69092" label="0110001101" cy:nodeId="27068">
    <graphics z="0.0" y="135.18288145842962" x="303.26056024525315"/>
  </node>
  <node id="69091" label="0110001011" cy:nodeId="27069">
    <graphics z="0.0" y="42.32606230559759" x="603.2854854771867"/>
  </node>
  <node id="69090" label="0110001001" cy:nodeId="27070">
    <graphics z="0.0" y="-52.05468262848444" x="336.21801111195236"/>
  </node>
  <node id="69089" label="1000111001" cy:nodeId="27071">
    <graphics z="0.0" y="77.85612212005071" x="1209.5337764928117"/>
  </node>
  <node id="69088" label="1000110101" cy:nodeId="27072">
    <graphics z="0.0" y="30.293797596124932" x="1062.8327724644914"/>
  </node>
  <node id="69087" label="1110001101" cy:nodeId="27073">
    <graphics z="0.0" y="-271.1085003775079" x="1249.3665706822649"/>
  </node>
  <node id="69086" label="1110001011" cy:nodeId="27074">
    <graphics z="0.0" y="-88.919566051336" x="1443.7988369176164"/>
  </node>
  <node id="69085" label="0001100110" cy:nodeId="27075">
    <graphics z="0.0" y="-20.268931285711005" x="-1310.8274829676375"/>
  </node>
  <node id="69084" label="1001100110" cy:nodeId="27076">
    <graphics z="0.0" y="-13.411677257390693" x="-282.0797031214461"/>
  </node>
  <node id="69083" label="0010001101" cy:nodeId="27077">
    <graphics z="0.0" y="159.41032896819524" x="542.8948299596086"/>
  </node>
  <node id="69082" label="0010001011" cy:nodeId="27078">
    <graphics z="0.0" y="96.74258910003118" x="385.57872888538986"/>
  </node>
  <node id="69081" label="0010001001" cy:nodeId="27079">
    <graphics z="0.0" y="-53.86493767914362" x="356.9976589391008"/>
  </node>
  <node id="69080" label="1110001001" cy:nodeId="27080">
    <graphics z="0.0" y="-270.66327943024226" x="1394.7637111851946"/>
  </node>
  <node id="69079" label="1010001101" cy:nodeId="27081">
    <graphics z="0.0" y="-287.1347454946954" x="1265.775552005507"/>
  </node>
  <node id="69078" label="1010001011" cy:nodeId="27082">
    <graphics z="0.0" y="116.26367674651556" x="1457.588296146132"/>
  </node>
  <node id="69077" label="1010001001" cy:nodeId="27083">
    <graphics z="0.0" y="-12.354056255193427" x="1395.4079372594133"/>
  </node>
  <node id="69076" label="0110111010" cy:nodeId="27084">
    <graphics z="0.0" y="247.80740843596868" x="-1164.412840633653"/>
  </node>
  <node id="69075" label="0110101010" cy:nodeId="27085">
    <graphics z="0.0" y="228.84958372893743" x="-1212.687655239366"/>
  </node>
  <node id="69074" label="1110111010" cy:nodeId="27086">
    <graphics z="0.0" y="-274.21207703766413" x="-178.28870275523514"/>
  </node>
  <node id="69073" label="1111011001" cy:nodeId="27087">
    <graphics z="0.0" y="93.96071348967962" x="1376.2612392613664"/>
  </node>
  <node id="69072" label="1111010101" cy:nodeId="27088">
    <graphics z="0.0" y="93.20477782073431" x="969.2520076939836"/>
  </node>
  <node id="69071" label="1111010011" cy:nodeId="27089">
    <graphics z="0.0" y="375.4142047006171" x="1290.6706630894914"/>
  </node>
  <node id="69070" label="1111010001" cy:nodeId="27090">
    <graphics z="0.0" y="63.15086088958196" x="1173.6552059361711"/>
  </node>
  <node id="69069" label="0111011001" cy:nodeId="27091">
    <graphics z="0.0" y="-188.08323182282038" x="446.328026981093"/>
  </node>
  <node id="69068" label="0111010101" cy:nodeId="27092">
    <graphics z="0.0" y="0.8225833016913384" x="276.4027111241594"/>
  </node>
  <node id="69067" label="0111010011" cy:nodeId="27093">
    <graphics z="0.0" y="44.4117098886054" x="357.5924617955461"/>
  </node>
  <node id="69066" label="0111010001" cy:nodeId="27094">
    <graphics z="0.0" y="-64.49914731201716" x="259.6108638951555"/>
  </node>
  <node id="69065" label="1110101010" cy:nodeId="27095">
    <graphics z="0.0" y="-203.79137124237604" x="-204.86432531382889"/>
  </node>
  <node id="69064" label="1010111010" cy:nodeId="27096">
    <graphics z="0.0" y="-219.82871140656061" x="-372.66107061412185"/>
  </node>
  <node id="69063" label="0101011110" cy:nodeId="27097">
    <graphics z="0.0" y="-74.21621216950007" x="-1246.8038704684004"/>
  </node>
  <node id="69062" label="0010111010" cy:nodeId="27098">
    <graphics z="0.0" y="-157.66073884186335" x="-1171.6845004847273"/>
  </node>
  <node id="69061" label="1101011110" cy:nodeId="27099">
    <graphics z="0.0" y="2.693303211359307" x="-442.5157745173201"/>
  </node>
  <node id="69060" label="0011011001" cy:nodeId="27100">
    <graphics z="0.0" y="-220.2516430777032" x="551.6325618932024"/>
  </node>
  <node id="69059" label="0011010101" cy:nodeId="27101">
    <graphics z="0.0" y="-92.49020661530085" x="486.80394861195236"/>
  </node>
  <node id="69058" label="0011010011" cy:nodeId="27102">
    <graphics z="0.0" y="-109.08215417084284" x="551.131493777968"/>
  </node>
  <node id="69057" label="0011010001" cy:nodeId="27103">
    <graphics z="0.0" y="-349.30460633453913" x="414.6286861607805"/>
  </node>
  <node id="69056" label="1011011001" cy:nodeId="27104">
    <graphics z="0.0" y="169.52954588714056" x="1371.4706814000383"/>
  </node>
  <node id="69055" label="1011010101" cy:nodeId="27105">
    <graphics z="0.0" y="149.71049986663274" x="1150.3340999791399"/>
  </node>
  <node id="69054" label="1011010011" cy:nodeId="27106">
    <graphics z="0.0" y="354.8783160287421" x="1182.7490932652727"/>
  </node>
  <node id="69053" label="1011010001" cy:nodeId="27107">
    <graphics z="0.0" y="232.35710631194524" x="1111.073373050429"/>
  </node>
  <node id="69052" label="0001011110" cy:nodeId="27108">
    <graphics z="0.0" y="-209.67902554688044" x="-1331.7571475794539"/>
  </node>
  <node id="69051" label="1001011110" cy:nodeId="27109">
    <graphics z="0.0" y="58.24002562346868" x="-572.568930416368"/>
  </node>
  <node id="69050" label="0101001001" cy:nodeId="27110">
    <graphics z="0.0" y="101.8300677377265" x="268.4952861974016"/>
  </node>
  <node id="69049" label="0100001101" cy:nodeId="27111">
    <graphics z="0.0" y="198.54317198577337" x="280.12877771351486"/>
  </node>
  <node id="69048" label="0100001011" cy:nodeId="27112">
    <graphics z="0.0" y="190.87703429046087" x="326.24340173695236"/>
  </node>
  <node id="69047" label="0100001001" cy:nodeId="27113">
    <graphics z="0.0" y="69.34877501311712" x="129.95937082264572"/>
  </node>
  <node id="69046" label="1101001001" cy:nodeId="27114">
    <graphics z="0.0" y="54.527978046564385" x="1349.5166408726946"/>
  </node>
  <node id="69045" label="1100001101" cy:nodeId="27115">
    <graphics z="0.0" y="-323.75089539703913" x="1095.169724673964"/>
  </node>
  <node id="69044" label="1100001011" cy:nodeId="27116">
    <graphics z="0.0" y="-108.62087525543757" x="1348.0325405308977"/>
  </node>
  <node id="69043" label="0110100110" cy:nodeId="27117">
    <graphics z="0.0" y="140.61313353362493" x="-1082.9370181849226"/>
  </node>
  <node id="69042" label="1110100110" cy:nodeId="27118">
    <graphics z="0.0" y="-90.15972413239069" x="-214.4172122767195"/>
  </node>
  <node id="69041" label="0001001001" cy:nodeId="27119">
    <graphics z="0.0" y="-132.89119614777155" x="246.20399972889572"/>
  </node>
  <node id="69040" label="0000001101" cy:nodeId="27120">
    <graphics z="0.0" y="231.78361998382024" x="304.89920923206955"/>
  </node>
  <node id="69039" label="0000001011" cy:nodeId="27121">
    <graphics z="0.0" y="130.14552794280462" x="405.0073787877336"/>
  </node>
  <node id="69038" label="0000001001" cy:nodeId="27122">
    <graphics z="0.0" y="107.07845030608587" x="135.55634424183518"/>
  </node>
  <node id="69037" label="1100001001" cy:nodeId="27123">
    <graphics z="0.0" y="-120.25915803131647" x="1203.8320553014055"/>
  </node>
  <node id="69036" label="1001001001" cy:nodeId="27124">
    <graphics z="0.0" y="211.19238768401556" x="1236.3071834752336"/>
  </node>
  <node id="69035" label="1000001101" cy:nodeId="27125">
    <graphics z="0.0" y="-225.63622559723444" x="1143.129540652968"/>
  </node>
  <node id="69034" label="1000001011" cy:nodeId="27126">
    <graphics z="0.0" y="136.06662474456243" x="1325.8328640172258"/>
  </node>
  <node id="69033" label="1000001001" cy:nodeId="27127">
    <graphics z="0.0" y="145.55803404632024" x="1254.2222072789446"/>
  </node>
  <node id="69032" label="0100111010" cy:nodeId="27128">
    <graphics z="0.0" y="157.4872485238593" x="-1378.024008541368"/>
  </node>
  <node id="69031" label="0100101010" cy:nodeId="27129">
    <graphics z="0.0" y="203.18704710784368" x="-1172.3839786341414"/>
  </node>
  <node id="69030" label="0010100110" cy:nodeId="27130">
    <graphics z="0.0" y="11.434208973078057" x="-1333.0589053919539"/>
  </node>
  <node id="69029" label="1100111010" cy:nodeId="27131">
    <graphics z="0.0" y="-85.96293915924616" x="-185.40486791636795"/>
  </node>
  <node id="69028" label="1010100110" cy:nodeId="27132">
    <graphics z="0.0" y="-136.8268040579278" x="-296.7454288294539"/>
  </node>
  <node id="69027" label="0101011001" cy:nodeId="27133">
    <graphics z="0.0" y="1.8040896493475884" x="432.69030115101486"/>
  </node>
  <node id="69026" label="0101010101" cy:nodeId="27134">
    <graphics z="0.0" y="13.058423145441338" x="264.02963373158127"/>
  </node>
  <node id="69025" label="0101010011" cy:nodeId="27135">
    <graphics z="0.0" y="125.000111683039" x="387.4863064000383"/>
  </node>
  <node id="69024" label="1101011001" cy:nodeId="27136">
    <graphics z="0.0" y="249.35210142913274" x="1296.2704860875383"/>
  </node>
  <node id="69023" label="1101010101" cy:nodeId="27137">
    <graphics z="0.0" y="-22.085595027776435" x="1065.3237926671281"/>
  </node>
  <node id="69022" label="1101010011" cy:nodeId="27138">
    <graphics z="0.0" y="378.48653136077337" x="1226.178628177382"/>
  </node>
  <node id="69021" label="1100101010" cy:nodeId="27139">
    <graphics z="0.0" y="-22.451731578679755" x="-144.18140295054764"/>
  </node>
  <node id="69020" label="1010101010" cy:nodeId="27140">
    <graphics z="0.0" y="-163.4086483877618" x="-299.15579870250076"/>
  </node>
  <node id="69019" label="1001101010" cy:nodeId="27141">
    <graphics z="0.0" y="-224.50883759674616" x="-193.8419406702742"/>
  </node>
  <node id="69018" label="1000111010" cy:nodeId="27142">
    <graphics z="0.0" y="-37.83182801422663" x="-354.3368900110945"/>
  </node>
  <node id="69017" label="1000101010" cy:nodeId="27143">
    <graphics z="0.0" y="-14.60837830719538" x="-155.8017337610945"/>
  </node>
  <node id="69016" label="0010101010" cy:nodeId="27144">
    <graphics z="0.0" y="24.935048206476495" x="-1382.0428836634383"/>
  </node>
  <node id="69015" label="0001101010" cy:nodeId="27145">
    <graphics z="0.0" y="169.92761717620306" x="-1300.2184818079695"/>
  </node>
  <node id="69014" label="0000111010" cy:nodeId="27146">
    <graphics z="0.0" y="-89.19793214020319" x="-1440.7182224085554"/>
  </node>
  <node id="69013" label="0000101010" cy:nodeId="27147">
    <graphics z="0.0" y="14.930348499445245" x="-1404.4864719202742"/>
  </node>
  <node id="69012" label="0001011001" cy:nodeId="27148">
    <graphics z="0.0" y="-82.09731330093928" x="626.2165157506242"/>
  </node>
  <node id="69011" label="0001010101" cy:nodeId="27149">
    <graphics z="0.0" y="-34.27551163849421" x="517.4837581822649"/>
  </node>
  <node id="69010" label="0001010011" cy:nodeId="27150">
    <graphics z="0.0" y="73.31645689788274" x="497.7753231236711"/>
  </node>
  <node id="69009" label="1001011001" cy:nodeId="27151">
    <graphics z="0.0" y="260.06856261077337" x="1222.3069393346086"/>
  </node>
  <node id="69008" label="1001010101" cy:nodeId="27152">
    <graphics z="0.0" y="196.39969359221868" x="974.969908923842"/>
  </node>
  <node id="69007" label="1001010011" cy:nodeId="27153">
    <graphics z="0.0" y="478.0368853646796" x="1213.2596981236711"/>
  </node>
  <node id="69006" label="0110011110" cy:nodeId="27154">
    <graphics z="0.0" y="-158.99071778473444" x="-1103.1454685023054"/>
  </node>
  <node id="69005" label="1110011110" cy:nodeId="27155">
    <graphics z="0.0" y="-178.56561173615046" x="-327.0382068445906"/>
  </node>
  <node id="69004" label="0100100110" cy:nodeId="27156">
    <graphics z="0.0" y="216.94192992034368" x="-1308.086783199571"/>
  </node>
  <node id="69003" label="1111101010" cy:nodeId="27157">
    <graphics z="0.0" y="-266.6299618643243" x="-189.04985693003982"/>
  </node>
  <node id="69002" label="1100100110" cy:nodeId="27158">
    <graphics z="0.0" y="116.64746580901556" x="-162.77289464976639"/>
  </node>
  <node id="69001" label="0111101010" cy:nodeId="27159">
    <graphics z="0.0" y="250.10193358245306" x="-1229.983652858995"/>
  </node>
  <node id="69000" label="1010011110" cy:nodeId="27160">
    <graphics z="0.0" y="-177.44228352722712" x="-511.8473575403914"/>
  </node>
  <node id="68999" label="0010011110" cy:nodeId="27161">
    <graphics z="0.0" y="-291.07716645416804" x="-1131.6123569300398"/>
  </node>
  <node id="68998" label="0000100110" cy:nodeId="27162">
    <graphics z="0.0" y="-53.721873180242255" x="-1514.1802127650008"/>
  </node>
  <node id="68997" label="1000100110" cy:nodeId="27163">
    <graphics z="0.0" y="98.28482542815618" x="-254.450049190782"/>
  </node>
  <node id="68996" label="0110011001" cy:nodeId="27164">
    <graphics z="0.0" y="-59.01592911896296" x="468.61327478382736"/>
  </node>
  <node id="68995" label="0110010101" cy:nodeId="27165">
    <graphics z="0.0" y="211.38655577483587" x="332.35799524281174"/>
  </node>
  <node id="68994" label="0110010011" cy:nodeId="27166">
    <graphics z="0.0" y="72.5678607064765" x="506.07149621937424"/>
  </node>
  <node id="68993" label="0110010001" cy:nodeId="27167">
    <graphics z="0.0" y="3.7300845223944634" x="331.1471492955461"/>
  </node>
  <node id="68992" label="0111110001" cy:nodeId="27168">
    <graphics z="0.0" y="-335.048472301336" x="281.6532070348039"/>
  </node>
  <node id="68991" label="0111100101" cy:nodeId="27169">
    <graphics z="0.0" y="-62.818749324651435" x="113.18517419788986"/>
  </node>
  <node id="68990" label="1110011001" cy:nodeId="27170">
    <graphics z="0.0" y="-127.7746914785821" x="1503.6713344762102"/>
  </node>
  <node id="68989" label="1110010101" cy:nodeId="27171">
    <graphics z="0.0" y="-9.62709225830622" x="1198.5347683141008"/>
  </node>
  <node id="68988" label="1110010011" cy:nodeId="27172">
    <graphics z="0.0" y="169.36772642913274" x="1278.929574222304"/>
  </node>
  <node id="68987" label="1110010001" cy:nodeId="27173">
    <graphics z="0.0" y="11.810335262445733" x="1366.797738284804"/>
  </node>
  <node id="68986" label="1111110001" cy:nodeId="27174">
    <graphics z="0.0" y="43.42853651824407" x="1016.3171150395647"/>
  </node>
  <node id="68985" label="1111100101" cy:nodeId="27175">
    <graphics z="0.0" y="-178.93276490387507" x="1187.4189846226946"/>
  </node>
  <node id="68984" label="0100011110" cy:nodeId="27176">
    <graphics z="0.0" y="-20.630335704656318" x="-1221.8993366053328"/>
  </node>
  <node id="68983" label="1100011110" cy:nodeId="27177">
    <graphics z="0.0" y="101.24966917815618" x="-347.5570819666609"/>
  </node>
  <node id="68982" label="0011110001" cy:nodeId="27178">
    <graphics z="0.0" y="-404.2260540884454" x="433.9773037144914"/>
  </node>
  <node id="68981" label="0011100101" cy:nodeId="27179">
    <graphics z="0.0" y="-113.42849244293757" x="210.5596058079973"/>
  </node>
  <node id="68980" label="0010011001" cy:nodeId="27180">
    <graphics z="0.0" y="-116.46041764435358" x="408.031396121718"/>
  </node>
  <node id="68979" label="0010010101" cy:nodeId="27181">
    <graphics z="0.0" y="83.93584166350774" x="446.7490474889055"/>
  </node>
  <node id="68978" label="0010010011" cy:nodeId="27182">
    <graphics z="0.0" y="70.39282713714056" x="613.3245174596086"/>
  </node>
  <node id="68977" label="0010010001" cy:nodeId="27183">
    <graphics z="0.0" y="-85.13466633972712" x="507.98787805531174"/>
  </node>
  <node id="68976" label="0011101100" cy:nodeId="27184">
    <graphics z="0.0" y="-15.856333629461005" x="-930.0465762903914"/>
  </node>
  <node id="68975" label="1011110001" cy:nodeId="27185">
    <graphics z="0.0" y="274.8159075814765" x="1215.2163173863664"/>
  </node>
  <node id="68974" label="1011100101" cy:nodeId="27186">
    <graphics z="0.0" y="-56.14135255035944" x="983.9999534795061"/>
  </node>
  <node id="68973" label="0101101010" cy:nodeId="27187">
    <graphics z="0.0" y="280.30930052581243" x="-1220.2861850550398"/>
  </node>
  <node id="68972" label="0000011110" cy:nodeId="27188">
    <graphics z="0.0" y="-279.42222489533015" x="-1276.8818309595808"/>
  </node>
  <node id="68971" label="1010011001" cy:nodeId="27189">
    <graphics z="0.0" y="57.47833739104681" x="1461.0511257359758"/>
  </node>
  <node id="68970" label="1010010101" cy:nodeId="27190">
    <graphics z="0.0" y="-122.66919221100397" x="1158.159798831679"/>
  </node>
  <node id="68969" label="1010010011" cy:nodeId="27191">
    <graphics z="0.0" y="274.48885069671087" x="1346.3688442418352"/>
  </node>
  <node id="68968" label="1010010001" cy:nodeId="27192">
    <graphics z="0.0" y="176.75671873870306" x="1207.4343349644914"/>
  </node>
  <node id="68967" label="1011101100" cy:nodeId="27193">
    <graphics z="0.0" y="84.34360228362493" x="-203.1043918421492"/>
  </node>
  <node id="68966" label="1101101010" cy:nodeId="27194">
    <graphics z="0.0" y="-137.55467881378718" x="-52.650519161485136"/>
  </node>
  <node id="68965" label="1000011110" cy:nodeId="27195">
    <graphics z="0.0" y="235.1409350472968" x="-530.9964282801375"/>
  </node>
  <node id="68964" label="0101010001" cy:nodeId="27196">
    <graphics z="0.0" y="-45.03011597809382" x="396.8604213902727"/>
  </node>
  <node id="68963" label="0100011001" cy:nodeId="27197">
    <graphics z="0.0" y="15.54329405608587" x="275.034814090468"/>
  </node>
  <node id="68962" label="0100010101" cy:nodeId="27198">
    <graphics z="0.0" y="246.37822447600774" x="255.04556009266526"/>
  </node>
  <node id="68961" label="0100010011" cy:nodeId="27199">
    <graphics z="0.0" y="334.7906695443671" x="449.4627010533586"/>
  </node>
  <node id="68960" label="0100010001" cy:nodeId="27200">
    <graphics z="0.0" y="138.69031248870306" x="387.28817102406174"/>
  </node>
  <node id="68959" label="0101110001" cy:nodeId="27201">
    <graphics z="0.0" y="-236.76230897125788" x="255.3099491307512"/>
  </node>
  <node id="68958" label="0101100101" cy:nodeId="27202">
    <graphics z="0.0" y="-67.06976403412409" x="156.2053005406633"/>
  </node>
  <node id="68957" label="1101010001" cy:nodeId="27203">
    <graphics z="0.0" y="161.90215025725774" x="1313.1805202672258"/>
  </node>
  <node id="68956" label="1100011001" cy:nodeId="27204">
    <graphics z="0.0" y="77.886830433039" x="1454.7077419469133"/>
  </node>
  <node id="68955" label="1100010101" cy:nodeId="27205">
    <graphics z="0.0" y="-178.19413270172663" x="1056.7596485326067"/>
  </node>
  <node id="68954" label="1100010011" cy:nodeId="27206">
    <graphics z="0.0" y="254.92909727874212" x="1280.5794155308977"/>
  </node>
  <node id="68953" label="1100010001" cy:nodeId="27207">
    <graphics z="0.0" y="41.38906966033392" x="1180.8958065221086"/>
  </node>
  <node id="68952" label="1101110001" cy:nodeId="27208">
    <graphics z="0.0" y="195.831898792414" x="1204.8926632115617"/>
  </node>
  <node id="68951" label="1101100101" cy:nodeId="27209">
    <graphics z="0.0" y="-99.08567322907038" x="885.4062282750383"/>
  </node>
  <node id="68950" label="1011100001" cy:nodeId="27210">
    <graphics z="0.0" y="41.09642134490423" x="975.519017429091"/>
  </node>
  <node id="68949" label="1001110001" cy:nodeId="27211">
    <graphics z="0.0" y="196.51297484221868" x="1037.068162173964"/>
  </node>
  <node id="68948" label="1001100101" cy:nodeId="27212">
    <graphics z="0.0" y="-17.8248623770196" x="857.7376644322649"/>
  </node>
  <node id="68947" label="0011100001" cy:nodeId="27213">
    <graphics z="0.0" y="-295.11025513825007" x="254.03349039051682"/>
  </node>
  <node id="68946" label="0001110001" cy:nodeId="27214">
    <graphics z="0.0" y="-280.2489880484063" x="455.73836633656174"/>
  </node>
  <node id="68945" label="0001100101" cy:nodeId="27215">
    <graphics z="0.0" y="33.80503569426946" x="264.5767070958391"/>
  </node>
  <node id="68944" label="0001010001" cy:nodeId="27216">
    <graphics z="0.0" y="-102.42578400787897" x="410.89168664906174"/>
  </node>
  <node id="68943" label="0000011001" cy:nodeId="27217">
    <graphics z="0.0" y="92.44572935882024" x="469.4320614049211"/>
  </node>
  <node id="68942" label="0000010101" cy:nodeId="27218">
    <graphics z="0.0" y="205.89738951507024" x="318.2865078160539"/>
  </node>
  <node id="68941" label="0000010011" cy:nodeId="27219">
    <graphics z="0.0" y="255.1762591439765" x="432.45446130726486"/>
  </node>
  <node id="68940" label="0000010001" cy:nodeId="27220">
    <graphics z="0.0" y="79.87408934417181" x="262.7968074986711"/>
  </node>
  <node id="68939" label="1001010001" cy:nodeId="27221">
    <graphics z="0.0" y="404.05452452483587" x="1128.6361934849992"/>
  </node>
  <node id="68938" label="1000011001" cy:nodeId="27222">
    <graphics z="0.0" y="-2.101546184392646" x="1252.4567348668352"/>
  </node>
  <node id="68937" label="1000010101" cy:nodeId="27223">
    <graphics z="0.0" y="-9.629958049627021" x="1143.2204067418352"/>
  </node>
  <node id="68936" label="1000010011" cy:nodeId="27224">
    <graphics z="0.0" y="359.40425597014837" x="1386.9480373570696"/>
  </node>
  <node id="68935" label="1000010001" cy:nodeId="27225">
    <graphics z="0.0" y="296.5323687631171" x="1276.7760708043352"/>
  </node>
  <node id="68934" label="0110110001" cy:nodeId="27226">
    <graphics z="0.0" y="-89.32446946320124" x="263.3534252354875"/>
  </node>
  <node id="68933" label="0110100101" cy:nodeId="27227">
    <graphics z="0.0" y="37.04932890716009" x="152.3333294102922"/>
  </node>
  <node id="68932" label="0110100001" cy:nodeId="27228">
    <graphics z="0.0" y="-47.79885758575983" x="143.05326959583908"/>
  </node>
  <node id="68931" label="1110110001" cy:nodeId="27229">
    <graphics z="0.0" y="-132.5396069448907" x="1051.0037624547258"/>
  </node>
  <node id="68930" label="1110100101" cy:nodeId="27230">
    <graphics z="0.0" y="-258.10514344391413" x="987.5964214513078"/>
  </node>
  <node id="68929" label="0110101100" cy:nodeId="27231">
    <graphics z="0.0" y="-73.70888795075007" x="-915.1755435755476"/>
  </node>
  <node id="68928" label="0100101100" cy:nodeId="27232">
    <graphics z="0.0" y="38.17401610198431" x="-1191.8595493128523"/>
  </node>
  <node id="68927" label="1110101100" cy:nodeId="27233">
    <graphics z="0.0" y="251.21841917815618" x="-157.43302038218826"/>
  </node>
  <node id="68926" label="1110100001" cy:nodeId="27234">
    <graphics z="0.0" y="-162.36513795075007" x="1107.4632579991594"/>
  </node>
  <node id="68925" label="1010110001" cy:nodeId="27235">
    <graphics z="0.0" y="-66.74210251984186" x="1142.237191409804"/>
  </node>
  <node id="68924" label="1010100101" cy:nodeId="27236">
    <graphics z="0.0" y="-223.25820435700007" x="969.7614605138078"/>
  </node>
  <node id="68923" label="0010110001" cy:nodeId="27237">
    <graphics z="0.0" y="-342.41800965485163" x="439.13143274281174"/>
  </node>
  <node id="68922" label="0010100101" cy:nodeId="27238">
    <graphics z="0.0" y="-103.7350357931573" x="179.7392704198137"/>
  </node>
  <node id="68921" label="1100101100" cy:nodeId="27239">
    <graphics z="0.0" y="241.3906909066718" x="-66.24506261851639"/>
  </node>
  <node id="68920" label="1010101100" cy:nodeId="27240">
    <graphics z="0.0" y="41.40396605315618" x="-363.0120075037703"/>
  </node>
  <node id="68919" label="1001101100" cy:nodeId="27241">
    <graphics z="0.0" y="182.60913573089056" x="-276.434668331407"/>
  </node>
  <node id="68918" label="1000101100" cy:nodeId="27242">
    <graphics z="0.0" y="170.6817065316718" x="-199.28575780894607"/>
  </node>
  <node id="68917" label="0010101100" cy:nodeId="27243">
    <graphics z="0.0" y="-212.18299473938532" x="-963.2511356165633"/>
  </node>
  <node id="68916" label="0001101100" cy:nodeId="27244">
    <graphics z="0.0" y="-59.355051891179755" x="-984.1301944544539"/>
  </node>
  <node id="68915" label="0000101100" cy:nodeId="27245">
    <graphics z="0.0" y="-159.84196747955866" x="-1097.9334781458601"/>
  </node>
  <node id="68914" label="0111101100" cy:nodeId="27246">
    <graphics z="0.0" y="102.98428831878118" x="-990.5937869837508"/>
  </node>
  <node id="68913" label="0111001110" cy:nodeId="27247">
    <graphics z="0.0" y="200.78470335784368" x="-948.0715091517195"/>
  </node>
  <node id="68912" label="0111001100" cy:nodeId="27248">
    <graphics z="0.0" y="-5.154856578679755" x="-904.2418887903914"/>
  </node>
  <node id="68911" label="1111101100" cy:nodeId="27249">
    <graphics z="0.0" y="12.305913074640557" x="-73.16361120250076"/>
  </node>
  <node id="68910" label="1111001110" cy:nodeId="27250">
    <graphics z="0.0" y="-99.33001984772272" x="-281.5038364222273"/>
  </node>
  <node id="68909" label="0100110001" cy:nodeId="27251">
    <graphics z="0.0" y="-219.06046570953913" x="217.44036981556565"/>
  </node>
  <node id="68908" label="0100100101" cy:nodeId="27252">
    <graphics z="0.0" y="129.83583555999212" x="69.73716852162033"/>
  </node>
  <node id="68907" label="0100100001" cy:nodeId="27253">
    <graphics z="0.0" y="-56.81353844818659" x="64.86464807484299"/>
  </node>
  <node id="68906" label="1100110001" cy:nodeId="27254">
    <graphics z="0.0" y="-79.61268891510554" x="961.2298748204485"/>
  </node>
  <node id="68905" label="1100100101" cy:nodeId="27255">
    <graphics z="0.0" y="-199.76830567535944" x="850.8777706334367"/>
  </node>
  <node id="68904" label="0011001110" cy:nodeId="27256">
    <graphics z="0.0" y="-113.69645966705866" x="-1127.6615131190047"/>
  </node>
  <node id="68903" label="1111001100" cy:nodeId="27257">
    <graphics z="0.0" y="131.91934691253118" x="-232.89224889781326"/>
  </node>
  <node id="68902" label="1011001110" cy:nodeId="27258">
    <graphics z="0.0" y="-13.895579234929755" x="-531.4798953821883"/>
  </node>
  <node id="68901" label="1100100001" cy:nodeId="27259">
    <graphics z="0.0" y="-80.12874116119929" x="902.4366237828508"/>
  </node>
  <node id="68900" label="1010100001" cy:nodeId="27260">
    <graphics z="0.0" y="-115.863169566961" x="956.9587032506242"/>
  </node>
  <node id="68899" label="1001100001" cy:nodeId="27261">
    <graphics z="0.0" y="121.74017058196478" x="847.5028011510149"/>
  </node>
  <node id="68898" label="1000110001" cy:nodeId="27262">
    <graphics z="0.0" y="140.28760252776556" x="1199.1714565465227"/>
  </node>
  <node id="68897" label="1000100101" cy:nodeId="27263">
    <graphics z="0.0" y="-135.14736451325007" x="898.7476131627336"/>
  </node>
  <node id="68896" label="1000100001" cy:nodeId="27264">
    <graphics z="0.0" y="53.00425444426946" x="971.1414425084367"/>
  </node>
  <node id="68895" label="0010100001" cy:nodeId="27265">
    <graphics z="0.0" y="-138.78972138580866" x="274.228791446425"/>
  </node>
  <node id="68894" label="0001100001" cy:nodeId="27266">
    <graphics z="0.0" y="-168.65168275055476" x="164.9124595830217"/>
  </node>
  <node id="68893" label="0000110001" cy:nodeId="27267">
    <graphics z="0.0" y="-129.19867982086726" x="308.71434900257736"/>
  </node>
  <node id="68892" label="0000100101" cy:nodeId="27268">
    <graphics z="0.0" y="199.77235899749212" x="231.84591791126877"/>
  </node>
  <node id="68891" label="0000100001" cy:nodeId="27269">
    <graphics z="0.0" y="-68.26031006989069" x="189.2418977925554"/>
  </node>
  <node id="68890" label="0111100001" cy:nodeId="27270">
    <graphics z="0.0" y="-246.87104310211726" x="129.80268594715744"/>
  </node>
  <node id="68889" label="0111000101" cy:nodeId="27271">
    <graphics z="0.0" y="49.969044788507745" x="209.30949422810227"/>
  </node>
  <node id="68888" label="0111000011" cy:nodeId="27272">
    <graphics z="0.0" y="-33.79156006989069" x="236.65058252308518"/>
  </node>
  <node id="68887" label="0111000001" cy:nodeId="27273">
    <graphics z="0.0" y="-19.338091747136787" x="138.33176156971604"/>
  </node>
  <node id="68886" label="1111100001" cy:nodeId="27274">
    <graphics z="0.0" y="-61.22410096344538" x="1082.4547130772844"/>
  </node>
  <node id="68885" label="1111000101" cy:nodeId="27275">
    <graphics z="0.0" y="-107.27427949127741" x="1064.8172161290422"/>
  </node>
  <node id="68884" label="1111000011" cy:nodeId="27276">
    <graphics z="0.0" y="245.45718870940618" x="1166.3269283482805"/>
  </node>
  <node id="68883" label="0101101100" cy:nodeId="27277">
    <graphics z="0.0" y="49.57623778167181" x="-973.651465206407"/>
  </node>
  <node id="68882" label="0101001110" cy:nodeId="27278">
    <graphics z="0.0" y="75.30487547698431" x="-1103.0833194544539"/>
  </node>
  <node id="68881" label="1101101100" cy:nodeId="27279">
    <graphics z="0.0" y="176.91333494964056" x="-53.45889928843826"/>
  </node>
  <node id="68880" label="1101001110" cy:nodeId="27280">
    <graphics z="0.0" y="103.34378538909368" x="-425.2068136027083"/>
  </node>
  <node id="68879" label="1111000001" cy:nodeId="27281">
    <graphics z="0.0" y="250.17216978850774" x="1191.4292843053117"/>
  </node>
  <node id="68878" label="1011000101" cy:nodeId="27282">
    <graphics z="0.0" y="47.60293684783392" x="926.667397708632"/>
  </node>
  <node id="68877" label="1011000011" cy:nodeId="27283">
    <graphics z="0.0" y="102.26514159026556" x="1127.6894008824602"/>
  </node>
  <node id="68876" label="1011000001" cy:nodeId="27284">
    <graphics z="0.0" y="224.30777464690618" x="1025.8816311070696"/>
  </node>
  <node id="68875" label="0011000101" cy:nodeId="27285">
    <graphics z="0.0" y="11.616704090265557" x="316.48744317982346"/>
  </node>
  <node id="68874" label="0011000011" cy:nodeId="27286">
    <graphics z="0.0" y="-25.17869843658991" x="416.61173364613205"/>
  </node>
  <node id="68873" label="0011000001" cy:nodeId="27287">
    <graphics z="0.0" y="-153.58195008453913" x="341.38497278187424"/>
  </node>
  <node id="68872" label="0011001100" cy:nodeId="27288">
    <graphics z="0.0" y="-187.73171509918757" x="-1006.2438571741804"/>
  </node>
  <node id="68871" label="0001001110" cy:nodeId="27289">
    <graphics z="0.0" y="-46.26407899078913" x="-1173.7382495692"/>
  </node>
  <node id="68870" label="1011001100" cy:nodeId="27290">
    <graphics z="0.0" y="43.82301817717962" x="-391.0601795008406"/>
  </node>
  <node id="68869" label="1001001110" cy:nodeId="27291">
    <graphics z="0.0" y="125.58185301604681" x="-411.5294750025496"/>
  </node>
  <node id="68868" label="1111110010" cy:nodeId="27292">
    <graphics z="0.0" y="-401.60114564117976" x="-353.94680669810623"/>
  </node>
  <node id="68867" label="0111110010" cy:nodeId="27293">
    <graphics z="0.0" y="208.9498950082343" x="-1357.1469104578719"/>
  </node>
  <node id="68866" label="0011110010" cy:nodeId="27294">
    <graphics z="0.0" y="65.86966429534368" x="-1472.8958194544539"/>
  </node>
  <node id="68865" label="1011110010" cy:nodeId="27295">
    <graphics z="0.0" y="-342.83059205231257" x="-551.3891513636336"/>
  </node>
  <node id="68864" label="0101100001" cy:nodeId="27296">
    <graphics z="0.0" y="-143.99474610504694" x="88.27184411976486"/>
  </node>
  <node id="68863" label="0101000101" cy:nodeId="27297">
    <graphics z="0.0" y="116.27667723479681" x="163.41681215260178"/>
  </node>
  <node id="68862" label="0101000011" cy:nodeId="27298">
    <graphics z="0.0" y="179.59901915374212" x="162.24791643116623"/>
  </node>
  <node id="68861" label="1101100001" cy:nodeId="27299">
    <graphics z="0.0" y="72.96831999602728" x="1019.0518200108781"/>
  </node>
  <node id="68860" label="1101000101" cy:nodeId="27300">
    <graphics z="0.0" y="99.54859648528509" x="901.9200222203508"/>
  </node>
  <node id="68859" label="1101000011" cy:nodeId="27301">
    <graphics z="0.0" y="320.54561339202337" x="1070.6944362828508"/>
  </node>
  <node id="68858" label="0111111100" cy:nodeId="27302">
    <graphics z="0.0" y="-39.45745362457819" x="-975.4039981653914"/>
  </node>
  <node id="68857" label="1111111100" cy:nodeId="27303">
    <graphics z="0.0" y="-49.06356324371882" x="-195.56474950816482"/>
  </node>
  <node id="68856" label="0101110010" cy:nodeId="27304">
    <graphics z="0.0" y="143.50198851409368" x="-1505.3038394739851"/>
  </node>
  <node id="68855" label="1110001110" cy:nodeId="27305">
    <graphics z="0.0" y="9.551213367609307" x="-240.68497350718826"/>
  </node>
  <node id="68854" label="1011111100" cy:nodeId="27306">
    <graphics z="0.0" y="-144.36880006012507" x="-458.89892652537674"/>
  </node>
  <node id="68853" label="1001000101" cy:nodeId="27307">
    <graphics z="0.0" y="-36.72597779450007" x="862.0456478307024"/>
  </node>
  <node id="68852" label="1001000011" cy:nodeId="27308">
    <graphics z="0.0" y="317.608265979914" x="1153.6924831578508"/>
  </node>
  <node id="68851" label="0011111100" cy:nodeId="27309">
    <graphics z="0.0" y="-116.27460755524226" x="-999.776221065782"/>
  </node>
  <node id="68850" label="1101110010" cy:nodeId="27310">
    <graphics z="0.0" y="-234.0780590933282" x="-328.30413702037185"/>
  </node>
  <node id="68849" label="0001000101" cy:nodeId="27311">
    <graphics z="0.0" y="119.50545225921087" x="234.40770837757736"/>
  </node>
  <node id="68848" label="0001000011" cy:nodeId="27312">
    <graphics z="0.0" y="137.19560728850774" x="323.7391903111711"/>
  </node>
  <node id="68847" label="0110001110" cy:nodeId="27313">
    <graphics z="0.0" y="79.64908324065618" x="-1039.5350406458601"/>
  </node>
  <node id="68846" label="0110001100" cy:nodeId="27314">
    <graphics z="0.0" y="-37.33233155426569" x="-840.6603763392195"/>
  </node>
  <node id="68845" label="0011100010" cy:nodeId="27315">
    <graphics z="0.0" y="68.19574461760931" x="-1359.9601276209578"/>
  </node>
  <node id="68844" label="0001110010" cy:nodeId="27316">
    <graphics z="0.0" y="-33.12682618317194" x="-1550.3751590540633"/>
  </node>
  <node id="68843" label="0010001110" cy:nodeId="27317">
    <graphics z="0.0" y="-188.8506077688653" x="-1098.9650180628523"/>
  </node>
  <node id="68842" label="1011100010" cy:nodeId="27318">
    <graphics z="0.0" y="-404.2260540884454" x="-415.0683353235945"/>
  </node>
  <node id="68841" label="1001110010" cy:nodeId="27319">
    <graphics z="0.0" y="-276.64474763092585" x="-508.1691654017195"/>
  </node>
  <node id="68840" label="1110001100" cy:nodeId="27320">
    <graphics z="0.0" y="113.11658201995306" x="-307.98523595836014"/>
  </node>
  <node id="68839" label="1010001110" cy:nodeId="27321">
    <graphics z="0.0" y="113.45685301604681" x="-342.70398595836014"/>
  </node>
  <node id="68838" label="1111010110" cy:nodeId="27322">
    <graphics z="0.0" y="-197.8803814810235" x="-488.12021139170974"/>
  </node>
  <node id="68837" label="1111010100" cy:nodeId="27323">
    <graphics z="0.0" y="-30.337397472234443" x="-443.5064342310652"/>
  </node>
  <node id="68836" label="0111010110" cy:nodeId="27324">
    <graphics z="0.0" y="2.1077471810858697" x="-1265.0806625178084"/>
  </node>
  <node id="68835" label="0111010100" cy:nodeId="27325">
    <graphics z="0.0" y="164.08707152190618" x="-1053.5365054896101"/>
  </node>
  <node id="68834" label="1011010110" cy:nodeId="27326">
    <graphics z="0.0" y="-171.65562905487604" x="-632.4485996058211"/>
  </node>
  <node id="68833" label="0011010110" cy:nodeId="27327">
    <graphics z="0.0" y="-146.1572598379571" x="-1278.3787467768416"/>
  </node>
  <node id="68832" label="0101111100" cy:nodeId="27328">
    <graphics z="0.0" y="-8.208643810125068" x="-1121.6406619837508"/>
  </node>
  <node id="68831" label="1101111100" cy:nodeId="27329">
    <graphics z="0.0" y="159.48196898284368" x="-231.50163915660232"/>
  </node>
  <node id="68830" label="0110000101" cy:nodeId="27330">
    <graphics z="0.0" y="210.86946593108587" x="102.7255642125383"/>
  </node>
  <node id="68829" label="0110000011" cy:nodeId="27331">
    <graphics z="0.0" y="173.60393248382024" x="308.95587274525315"/>
  </node>
  <node id="68828" label="0110000001" cy:nodeId="27332">
    <graphics z="0.0" y="223.15517149749212" x="134.76408502552658"/>
  </node>
  <node id="68827" label="1110000101" cy:nodeId="27333">
    <graphics z="0.0" y="-195.2517193716485" x="1058.3611805150285"/>
  </node>
  <node id="68826" label="1110000011" cy:nodeId="27334">
    <graphics z="0.0" y="-24.030835048528388" x="1324.9856960484758"/>
  </node>
  <node id="68825" label="0101001100" cy:nodeId="27335">
    <graphics z="0.0" y="-19.858958141179755" x="-972.4878604700789"/>
  </node>
  <node id="68824" label="0100001110" cy:nodeId="27336">
    <graphics z="0.0" y="52.43900023284368" x="-957.9259403040633"/>
  </node>
  <node id="68823" label="0100001100" cy:nodeId="27337">
    <graphics z="0.0" y="-249.82677735504694" x="-1054.7023685267195"/>
  </node>
  <node id="68822" label="0001111100" cy:nodeId="27338">
    <graphics z="0.0" y="-197.34644211945124" x="-1176.1578510096297"/>
  </node>
  <node id="68821" label="1101001100" cy:nodeId="27339">
    <graphics z="0.0" y="275.37668333831243" x="-306.27637365367264"/>
  </node>
  <node id="68820" label="1100001110" cy:nodeId="27340">
    <graphics z="0.0" y="203.65762816253118" x="-296.525732784532"/>
  </node>
  <node id="68819" label="1001111100" cy:nodeId="27341">
    <graphics z="0.0" y="168.0203295785468" x="-381.0478732874617"/>
  </node>
  <node id="68818" label="0010000101" cy:nodeId="27342">
    <graphics z="0.0" y="99.26277647796087" x="309.5225078770891"/>
  </node>
  <node id="68817" label="0010000011" cy:nodeId="27343">
    <graphics z="0.0" y="154.017201526789" x="509.7860653111711"/>
  </node>
  <node id="68816" label="0010000001" cy:nodeId="27344">
    <graphics z="0.0" y="136.11716185393743" x="408.6605312535539"/>
  </node>
  <node id="68815" label="1110000001" cy:nodeId="27345">
    <graphics z="0.0" y="43.36911497893743" x="1354.5759060094133"/>
  </node>
  <node id="68814" label="1010000101" cy:nodeId="27346">
    <graphics z="0.0" y="-17.650185481877998" x="1043.6624691197649"/>
  </node>
  <node id="68813" label="1010000011" cy:nodeId="27347">
    <graphics z="0.0" y="143.15079222503118" x="1236.5369350621477"/>
  </node>
  <node id="68812" label="1010000001" cy:nodeId="27348">
    <graphics z="0.0" y="67.91299162688665" x="1041.9079448888078"/>
  </node>
  <node id="68811" label="0110110010" cy:nodeId="27349">
    <graphics z="0.0" y="258.5972338754218" x="-1212.5584552576765"/>
  </node>
  <node id="68810" label="0110100010" cy:nodeId="27350">
    <graphics z="0.0" y="197.37021361174993" x="-1237.3306320002303"/>
  </node>
  <node id="68809" label="0010001100" cy:nodeId="27351">
    <graphics z="0.0" y="-239.19365586456843" x="-847.1129215052351"/>
  </node>
  <node id="68808" label="0001001100" cy:nodeId="27352">
    <graphics z="0.0" y="-168.8784054678399" x="-987.1088626673445"/>
  </node>
  <node id="68807" label="0000001110" cy:nodeId="27353">
    <graphics z="0.0" y="-199.11541451630183" x="-1123.699789791368"/>
  </node>
  <node id="68806" label="0000001100" cy:nodeId="27354">
    <graphics z="0.0" y="-313.44494141754694" x="-1055.9763248255476"/>
  </node>
  <node id="68805" label="1100001100" cy:nodeId="27355">
    <graphics z="0.0" y="309.7476245004218" x="-262.75589635875076"/>
  </node>
  <node id="68804" label="1010001100" cy:nodeId="27356">
    <graphics z="0.0" y="226.39941893401556" x="-549.3631274988875"/>
  </node>
  <node id="68803" label="1001001100" cy:nodeId="27357">
    <graphics z="0.0" y="202.79831419768743" x="-428.5140884211287"/>
  </node>
  <node id="68802" label="1000001110" cy:nodeId="27358">
    <graphics z="0.0" y="280.0295764047187" x="-348.47432592418045"/>
  </node>
  <node id="68801" label="1000001100" cy:nodeId="27359">
    <graphics z="0.0" y="301.9903918344062" x="-488.166300564073"/>
  </node>
  <node id="68800" label="1110110010" cy:nodeId="27360">
    <graphics z="0.0" y="-196.74965848145075" x="-240.30333593394607"/>
  </node>
  <node id="68799" label="1101010110" cy:nodeId="27361">
    <graphics z="0.0" y="72.66397581878118" x="-610.0223300745711"/>
  </node>
  <node id="68798" label="0101010110" cy:nodeId="27362">
    <graphics z="0.0" y="47.27194701018743" x="-1426.1950290491804"/>
  </node>
  <node id="68797" label="0010110010" cy:nodeId="27363">
    <graphics z="0.0" y="-139.55099763092585" x="-1373.4544055750594"/>
  </node>
  <node id="68796" label="1110100010" cy:nodeId="27364">
    <graphics z="0.0" y="-173.7721074980218" x="-223.27442052867264"/>
  </node>
  <node id="68795" label="1010110010" cy:nodeId="27365">
    <graphics z="0.0" y="-270.7009915274102" x="-579.4558475306258"/>
  </node>
  <node id="68794" label="1011010100" cy:nodeId="27366">
    <graphics z="0.0" y="-125.16179932770319" x="-740.6603763392195"/>
  </node>
  <node id="68793" label="1001010110" cy:nodeId="27367">
    <graphics z="0.0" y="-52.137644664617255" x="-537.6874225428328"/>
  </node>
  <node id="68792" label="0011010100" cy:nodeId="27368">
    <graphics z="0.0" y="-129.31325043854304" x="-1097.4973056605086"/>
  </node>
  <node id="68791" label="0001010110" cy:nodeId="27369">
    <graphics z="0.0" y="-181.4692944448907" x="-1470.4452579310164"/>
  </node>
  <node id="68790" label="0101000001" cy:nodeId="27370">
    <graphics z="0.0" y="169.63786803069524" x="205.27843591663986"/>
  </node>
  <node id="68789" label="0100000101" cy:nodeId="27371">
    <graphics z="0.0" y="290.07954893889837" x="110.8878185460344"/>
  </node>
  <node id="68788" label="0100000011" cy:nodeId="27372">
    <graphics z="0.0" y="213.33931456389837" x="139.03763696644455"/>
  </node>
  <node id="68787" label="0100000001" cy:nodeId="27373">
    <graphics z="0.0" y="155.78647337737493" x="90.06000635121018"/>
  </node>
  <node id="68786" label="1101000001" cy:nodeId="27374">
    <graphics z="0.0" y="198.84074889007024" x="1088.9371807286516"/>
  </node>
  <node id="68785" label="1100000101" cy:nodeId="27375">
    <graphics z="0.0" y="-169.9023541372735" x="960.5128948399797"/>
  </node>
  <node id="68784" label="1100000011" cy:nodeId="27376">
    <graphics z="0.0" y="24.01930723967962" x="1301.983803958632"/>
  </node>
  <node id="68783" label="0110111100" cy:nodeId="27377">
    <graphics z="0.0" y="-193.5580624502618" x="-978.1872623255476"/>
  </node>
  <node id="68782" label="1110111100" cy:nodeId="27378">
    <graphics z="0.0" y="113.67868529143743" x="-262.70650365855545"/>
  </node>
  <node id="68781" label="1100000001" cy:nodeId="27379">
    <graphics z="0.0" y="-25.76210488495417" x="981.4310142705217"/>
  </node>
  <node id="68780" label="1001000001" cy:nodeId="27380">
    <graphics z="0.0" y="283.1519976693671" x="1015.3401424596086"/>
  </node>
  <node id="68779" label="1000000101" cy:nodeId="27381">
    <graphics z="0.0" y="-74.55800904450007" x="1052.580338687636"/>
  </node>
  <node id="68778" label="1000000011" cy:nodeId="27382">
    <graphics z="0.0" y="183.1366625863593" x="1102.2356044957414"/>
  </node>
  <node id="68777" label="1000000001" cy:nodeId="27383">
    <graphics z="0.0" y="161.2770434457343" x="977.5760204503313"/>
  </node>
  <node id="68776" label="0001000001" cy:nodeId="27384">
    <graphics z="0.0" y="52.29970274749212" x="125.71019098255783"/>
  </node>
  <node id="68775" label="0000000101" cy:nodeId="27385">
    <graphics z="0.0" y="332.449086292414" x="191.32545396778733"/>
  </node>
  <node id="68774" label="0000000011" cy:nodeId="27386">
    <graphics z="0.0" y="315.8150836068671" x="290.7161876866594"/>
  </node>
  <node id="68773" label="0000000001" cy:nodeId="27387">
    <graphics z="0.0" y="156.53830443206243" x="170.3494999120012"/>
  </node>
  <node id="68772" label="0100110010" cy:nodeId="27388">
    <graphics z="0.0" y="70.53690062346868" x="-1468.932471065782"/>
  </node>
  <node id="68771" label="0100100010" cy:nodeId="27389">
    <graphics z="0.0" y="348.95090208831243" x="-1330.2578723719344"/>
  </node>
  <node id="68770" label="0010111100" cy:nodeId="27390">
    <graphics z="0.0" y="-333.4147747915704" x="-1041.6019351771101"/>
  </node>
  <node id="68769" label="1100110010" cy:nodeId="27391">
    <graphics z="0.0" y="-142.20224274811335" x="-354.31839635875076"/>
  </node>
  <node id="68768" label="1010111100" cy:nodeId="27392">
    <graphics z="0.0" y="94.83789549651556" x="-394.4628131678328"/>
  </node>
  <node id="68767" label="0010100010" cy:nodeId="27393">
    <graphics z="0.0" y="-39.97886170563288" x="-1458.0145938685164"/>
  </node>
  <node id="68766" label="0001100010" cy:nodeId="27394">
    <graphics z="0.0" y="-5.193262950750068" x="-1420.6115939905867"/>
  </node>
  <node id="68765" label="0000110010" cy:nodeId="27395">
    <graphics z="0.0" y="-146.09623994049616" x="-1517.4583804896101"/>
  </node>
  <node id="68764" label="0000100010" cy:nodeId="27396">
    <graphics z="0.0" y="50.18094359221868" x="-1484.819174556993"/>
  </node>
  <node id="68763" label="1100100010" cy:nodeId="27397">
    <graphics z="0.0" y="-11.452326671453193" x="-271.18570592906326"/>
  </node>
  <node id="68762" label="1010100010" cy:nodeId="27398">
    <graphics z="0.0" y="-307.04184235748835" x="-430.30249097850174"/>
  </node>
  <node id="68761" label="1001100010" cy:nodeId="27399">
    <graphics z="0.0" y="-112.40786256012507" x="-273.21219518687576"/>
  </node>
  <node id="68760" label="1000110010" cy:nodeId="27400">
    <graphics z="0.0" y="-194.72099961456843" x="-512.3733508875594"/>
  </node>
  <node id="68759" label="1000100010" cy:nodeId="27401">
    <graphics z="0.0" y="-196.36904133972712" x="-364.9601505091414"/>
  </node>
  <node id="68758" label="1110010110" cy:nodeId="27402">
    <graphics z="0.0" y="-154.70246972260065" x="-442.156610279344"/>
  </node>
  <node id="68757" label="1110010100" cy:nodeId="27403">
    <graphics z="0.0" y="46.99374876799993" x="-597.6483676722273"/>
  </node>
  <node id="68756" label="0110010110" cy:nodeId="27404">
    <graphics z="0.0" y="58.62933836760931" x="-1012.6734531214461"/>
  </node>
  <node id="68755" label="0110010100" cy:nodeId="27405">
    <graphics z="0.0" y="-145.7317685049493" x="-1019.5925052454695"/>
  </node>
  <node id="68754" label="0111110100" cy:nodeId="27406">
    <graphics z="0.0" y="93.00290404143743" x="-1109.2810428431258"/>
  </node>
  <node id="68753" label="1111110100" cy:nodeId="27407">
    <graphics z="0.0" y="64.6652728158515" x="-280.1122501185164"/>
  </node>
  <node id="68752" label="1010010110" cy:nodeId="27408">
    <graphics z="0.0" y="-11.86802186188288" x="-694.5937106898054"/>
  </node>
  <node id="68751" label="0010010110" cy:nodeId="27409">
    <graphics z="0.0" y="-131.17116822418757" x="-1052.5227573206648"/>
  </node>
  <node id="68750" label="0111100010" cy:nodeId="27410">
    <graphics z="0.0" y="304.73276243987493" x="-1294.6942432215437"/>
  </node>
  <node id="68749" label="0100111100" cy:nodeId="27411">
    <graphics z="0.0" y="-184.9606274527032" x="-1281.2766025355086"/>
  </node>
  <node id="68748" label="0011110100" cy:nodeId="27412">
    <graphics z="0.0" y="-81.68839539703913" x="-1114.944693355821"/>
  </node>
  <node id="68747" label="1011110100" cy:nodeId="27413">
    <graphics z="0.0" y="-3.266016857000068" x="-624.7426059534773"/>
  </node>
  <node id="68746" label="1100111100" cy:nodeId="27414">
    <graphics z="0.0" y="283.2569933969062" x="-231.97746923472732"/>
  </node>
  <node id="68745" label="1111100010" cy:nodeId="27415">
    <graphics z="0.0" y="-329.23415650543757" x="-179.61807897593826"/>
  </node>
  <node id="68744" label="0000111100" cy:nodeId="27416">
    <graphics z="0.0" y="-295.925181285711" x="-1298.1161678126082"/>
  </node>
  <node id="68743" label="1000111100" cy:nodeId="27417">
    <graphics z="0.0" y="322.98398314299993" x="-386.94861486461014"/>
  </node>
  <node id="68742" label="1101010100" cy:nodeId="27418">
    <graphics z="0.0" y="162.2263842660468" x="-517.9834277918562"/>
  </node>
  <node id="68741" label="1100010110" cy:nodeId="27419">
    <graphics z="0.0" y="68.966176136164" x="-446.33790853526443"/>
  </node>
  <node id="68740" label="1100010100" cy:nodeId="27420">
    <graphics z="0.0" y="237.9496508676093" x="-418.11684682872146"/>
  </node>
  <node id="68739" label="0101010100" cy:nodeId="27421">
    <graphics z="0.0" y="-49.76241578278132" x="-1221.132172374986"/>
  </node>
  <node id="68738" label="0100010110" cy:nodeId="27422">
    <graphics z="0.0" y="76.76843748870306" x="-1267.7306583216414"/>
  </node>
  <node id="68737" label="0100010100" cy:nodeId="27423">
    <graphics z="0.0" y="-152.2561596792657" x="-1281.3982265284285"/>
  </node>
  <node id="68736" label="1111011100" cy:nodeId="27424">
    <graphics z="0.0" y="-85.35542573151179" x="-393.58799627330154"/>
  </node>
  <node id="68735" label="1111011010" cy:nodeId="27425">
    <graphics z="0.0" y="-331.5150708120782" x="-501.3826320460066"/>
  </node>
  <node id="68734" label="0111011100" cy:nodeId="27426">
    <graphics z="0.0" y="-120.02409638580866" x="-889.660254268907"/>
  </node>
  <node id="68733" label="0111011010" cy:nodeId="27427">
    <graphics z="0.0" y="123.04526243987493" x="-1107.856039791368"/>
  </node>
  <node id="68732" label="0101110100" cy:nodeId="27428">
    <graphics z="0.0" y="71.33102904143743" x="-1375.6517856409773"/>
  </node>
  <node id="68731" label="1101110100" cy:nodeId="27429">
    <graphics z="0.0" y="180.44455443206243" x="-400.26023748423904"/>
  </node>
  <node id="68730" label="1010010100" cy:nodeId="27430">
    <graphics z="0.0" y="131.67831908049993" x="-701.0576236536726"/>
  </node>
  <node id="68729" label="1001010100" cy:nodeId="27431">
    <graphics z="0.0" y="87.91391478362493" x="-618.1126773646101"/>
  </node>
  <node id="68728" label="1000010110" cy:nodeId="27432">
    <graphics z="0.0" y="96.40778075042181" x="-590.6297824671492"/>
  </node>
  <node id="68727" label="1000010100" cy:nodeId="27433">
    <graphics z="0.0" y="234.91922484221868" x="-697.0170657923445"/>
  </node>
  <node id="68726" label="0010010100" cy:nodeId="27434">
    <graphics z="0.0" y="-351.200327770086" x="-1099.7058780482039"/>
  </node>
  <node id="68725" label="0001010100" cy:nodeId="27435">
    <graphics z="0.0" y="-305.71804322418757" x="-1362.8226688196883"/>
  </node>
  <node id="68724" label="0000010110" cy:nodeId="27436">
    <graphics z="0.0" y="-194.3409241598565" x="-1281.1051643183455"/>
  </node>
  <node id="68723" label="0000010100" cy:nodeId="27437">
    <graphics z="0.0" y="-342.411753551336" x="-1304.573225765489"/>
  </node>
  <node id="68722" label="0011011100" cy:nodeId="27438">
    <graphics z="0.0" y="-185.5343007009942" x="-1056.3771426966414"/>
  </node>
  <node id="68721" label="0011011010" cy:nodeId="27439">
    <graphics z="0.0" y="37.07129393401556" x="-1150.2347629358992"/>
  </node>
  <node id="68720" label="0001110100" cy:nodeId="27440">
    <graphics z="0.0" y="-139.73733033356257" x="-1468.3906772425398"/>
  </node>
  <node id="68719" label="0101100010" cy:nodeId="27441">
    <graphics z="0.0" y="276.47018919768743" x="-1404.421484737657"/>
  </node>
  <node id="68718" label="1011011100" cy:nodeId="27442">
    <graphics z="0.0" y="48.46254454436712" x="-596.160742550157"/>
  </node>
  <node id="68717" label="1011011010" cy:nodeId="27443">
    <graphics z="0.0" y="-294.628550426336" x="-589.2037875941023"/>
  </node>
  <node id="68716" label="1001110100" cy:nodeId="27444">
    <graphics z="0.0" y="181.37613402190618" x="-553.3914249232039"/>
  </node>
  <node id="68715" label="1101100010" cy:nodeId="27445">
    <graphics z="0.0" y="-259.4599408071954" x="-287.5644748499617"/>
  </node>
  <node id="68714" label="0101011100" cy:nodeId="27446">
    <graphics z="0.0" y="-103.36106385407038" x="-1024.1467502405867"/>
  </node>
  <node id="68713" label="0101011010" cy:nodeId="27447">
    <graphics z="0.0" y="179.2929125863593" x="-1187.887160091661"/>
  </node>
  <node id="68712" label="1101011100" cy:nodeId="27448">
    <graphics z="0.0" y="144.00125609221868" x="-421.1891372492537"/>
  </node>
  <node id="68711" label="1101011010" cy:nodeId="27449">
    <graphics z="0.0" y="-182.27390946564265" x="-437.47659280803055"/>
  </node>
  <node id="68710" label="0110110100" cy:nodeId="27450">
    <graphics z="0.0" y="-122.93056000885554" x="-931.0583255579695"/>
  </node>
  <node id="68709" label="0001011100" cy:nodeId="27451">
    <graphics z="0.0" y="-305.60097779450007" x="-1233.4418247034773"/>
  </node>
  <node id="68708" label="0001011010" cy:nodeId="27452">
    <graphics z="0.0" y="-200.51067437347956" x="-1297.3782069971785"/>
  </node>
  <node id="68707" label="1001011100" cy:nodeId="27453">
    <graphics z="0.0" y="156.35498534026556" x="-588.3945377161726"/>
  </node>
  <node id="68706" label="1001011010" cy:nodeId="27454">
    <graphics z="0.0" y="-80.8674649160821" x="-495.3558795740828"/>
  </node>
  <node id="68705" label="1110110100" cy:nodeId="27455">
    <graphics z="0.0" y="76.16238890471868" x="-327.42661932017654"/>
  </node>
  <node id="68704" label="0010110100" cy:nodeId="27456">
    <graphics z="0.0" y="-233.14102067169733" x="-1181.4775913050398"/>
  </node>
  <node id="68703" label="1010110100" cy:nodeId="27457">
    <graphics z="0.0" y="107.77509032073431" x="-524.143278866075"/>
  </node>
  <node id="68702" label="0100110100" cy:nodeId="27458">
    <graphics z="0.0" y="4.993474109796807" x="-1190.2380512049422"/>
  </node>
  <node id="68701" label="0110011100" cy:nodeId="27459">
    <graphics z="0.0" y="-240.70357407745905" x="-974.1954410364851"/>
  </node>
  <node id="68700" label="0110011010" cy:nodeId="27460">
    <graphics z="0.0" y="196.67526732268743" x="-989.3509891321883"/>
  </node>
  <node id="68699" label="1100110100" cy:nodeId="27461">
    <graphics z="0.0" y="224.63339720549993" x="-347.2682636072859"/>
  </node>
  <node id="68698" label="1110011100" cy:nodeId="27462">
    <graphics z="0.0" y="-5.774012462468818" x="-384.5498683741316"/>
  </node>
  <node id="68697" label="1110011010" cy:nodeId="27463">
    <graphics z="0.0" y="-266.07817353424616" x="-451.64371946360916"/>
  </node>
  <node id="68696" label="0000110100" cy:nodeId="27464">
    <graphics z="0.0" y="-229.4286860388238" x="-1336.4088809778914"/>
  </node>
  <node id="68695" label="0010011100" cy:nodeId="27465">
    <graphics z="0.0" y="-404.2260540884454" x="-967.3983524134383"/>
  </node>
  <node id="68694" label="0010011010" cy:nodeId="27466">
    <graphics z="0.0" y="-16.804957286687568" x="-1043.6967990687117"/>
  </node>
  <node id="68693" label="1010011100" cy:nodeId="27467">
    <graphics z="0.0" y="102.98364744964056" x="-571.2865360071883"/>
  </node>
  <node id="68692" label="1010011010" cy:nodeId="27468">
    <graphics z="0.0" y="-129.78143586334772" x="-543.8922565272078"/>
  </node>
  <node id="68691" label="1000110100" cy:nodeId="27469">
    <graphics z="0.0" y="258.3740588265937" x="-574.7757785608992"/>
  </node>
  <node id="68690" label="0111100100" cy:nodeId="27470">
    <graphics z="0.0" y="149.52182493987493" x="-987.8856571009383"/>
  </node>
  <node id="68689" label="0111000110" cy:nodeId="27471">
    <graphics z="0.0" y="223.06723509612493" x="-1152.5681522181258"/>
  </node>
  <node id="68688" label="0111000100" cy:nodeId="27472">
    <graphics z="0.0" y="261.4256030160468" x="-1009.1011264612898"/>
  </node>
  <node id="68687" label="1111100100" cy:nodeId="27473">
    <graphics z="0.0" y="-26.900828258367255" x="-109.35785558726639"/>
  </node>
  <node id="68686" label="1111000110" cy:nodeId="27474">
    <graphics z="0.0" y="-108.25714387116022" x="-353.16084936168045"/>
  </node>
  <node id="68685" label="0100011100" cy:nodeId="27475">
    <graphics z="0.0" y="-145.82672394928522" x="-1066.7621829798445"/>
  </node>
  <node id="68684" label="0100011010" cy:nodeId="27476">
    <graphics z="0.0" y="-82.12911500153132" x="-1019.6030948450789"/>
  </node>
  <node id="68683" label="0011100100" cy:nodeId="27477">
    <graphics z="0.0" y="-85.87636841950007" x="-894.304053097032"/>
  </node>
  <node id="68682" label="0011000110" cy:nodeId="27478">
    <graphics z="0.0" y="-31.800196544500068" x="-1264.2056339075789"/>
  </node>
  <node id="68681" label="1111000100" cy:nodeId="27479">
    <graphics z="0.0" y="62.099904163507745" x="-241.90888097789139"/>
  </node>
  <node id="68680" label="1011100100" cy:nodeId="27480">
    <graphics z="0.0" y="-210.82315720734186" x="-248.90755346324295"/>
  </node>
  <node id="68679" label="1011000110" cy:nodeId="27481">
    <graphics z="0.0" y="-69.74387635407038" x="-514.4629581263289"/>
  </node>
  <node id="68678" label="1100011100" cy:nodeId="27482">
    <graphics z="0.0" y="192.25552855315618" x="-458.21593168284744"/>
  </node>
  <node id="68677" label="1100011010" cy:nodeId="27483">
    <graphics z="0.0" y="-14.820338146062568" x="-392.1456287195906"/>
  </node>
  <node id="68676" label="1011101000" cy:nodeId="27484">
    <graphics z="0.0" y="-144.2844227713067" x="-317.54276159312576"/>
  </node>
  <node id="68675" label="0011101000" cy:nodeId="27485">
    <graphics z="0.0" y="29.960637195734307" x="-1037.6002872278914"/>
  </node>
  <node id="68674" label="0000011100" cy:nodeId="27486">
    <graphics z="0.0" y="-298.883921520086" x="-1116.3849399378523"/>
  </node>
  <node id="68673" label="0000011010" cy:nodeId="27487">
    <graphics z="0.0" y="-299.85448731598444" x="-1133.598372249864"/>
  </node>
  <node id="68672" label="1000011100" cy:nodeId="27488">
    <graphics z="0.0" y="297.34241209807806" x="-566.1351154139265"/>
  </node>
  <node id="68671" label="1000011010" cy:nodeId="27489">
    <graphics z="0.0" y="54.16931639495306" x="-551.2614810755476"/>
  </node>
  <node id="68670" label="0101100100" cy:nodeId="27490">
    <graphics z="0.0" y="48.74173460784368" x="-1123.6076114466414"/>
  </node>
  <node id="68669" label="0101000110" cy:nodeId="27491">
    <graphics z="0.0" y="185.1973315316718" x="-1325.4421298792586"/>
  </node>
  <node id="68668" label="1101100100" cy:nodeId="27492">
    <graphics z="0.0" y="155.88205443206243" x="-152.25702550914139"/>
  </node>
  <node id="68667" label="1101000110" cy:nodeId="27493">
    <graphics z="0.0" y="41.14120970549993" x="-477.420264034532"/>
  </node>
  <node id="68666" label="0011000100" cy:nodeId="27494">
    <graphics z="0.0" y="-132.32493104157038" x="-1141.8121555140242"/>
  </node>
  <node id="68665" label="0001100100" cy:nodeId="27495">
    <graphics z="0.0" y="-165.28565873322077" x="-1211.9180057337508"/>
  </node>
  <node id="68664" label="0001000110" cy:nodeId="27496">
    <graphics z="0.0" y="-146.85051240143366" x="-1264.3773429682478"/>
  </node>
  <node id="68663" label="1011000100" cy:nodeId="27497">
    <graphics z="0.0" y="11.117039783624932" x="-477.90762212779373"/>
  </node>
  <node id="68662" label="1001100100" cy:nodeId="27498">
    <graphics z="0.0" y="130.10001097503118" x="-289.4696719935164"/>
  </node>
  <node id="68661" label="1001000110" cy:nodeId="27499">
    <graphics z="0.0" y="59.16421995940618" x="-516.388655452989"/>
  </node>
  <node id="68660" label="0110101000" cy:nodeId="27500">
    <graphics z="0.0" y="-43.67876710114069" x="-1056.3459384730086"/>
  </node>
  <node id="68659" label="1110101000" cy:nodeId="27501">
    <graphics z="0.0" y="41.81290160003118" x="-123.78073766734451"/>
  </node>
  <node id="68658" label="0111111000" cy:nodeId="27502">
    <graphics z="0.0" y="116.69504271331243" x="-1257.2204778483137"/>
  </node>
  <node id="68657" label="1111111000" cy:nodeId="27503">
    <graphics z="0.0" y="-197.0469311636407" x="-290.0841739466414"/>
  </node>
  <node id="68656" label="0110100100" cy:nodeId="27504">
    <graphics z="0.0" y="69.68661986174993" x="-971.2034366419539"/>
  </node>
  <node id="68655" label="0110000110" cy:nodeId="27505">
    <graphics z="0.0" y="213.48184691253118" x="-1047.3193271448836"/>
  </node>
  <node id="68654" label="0110000100" cy:nodeId="27506">
    <graphics z="0.0" y="23.117924793390557" x="-1086.3764102747664"/>
  </node>
  <node id="68653" label="0011111000" cy:nodeId="27507">
    <graphics z="0.0" y="47.73630247893743" x="-1108.7585819056258"/>
  </node>
  <node id="68652" label="1110100100" cy:nodeId="27508">
    <graphics z="0.0" y="83.62772093596868" x="-314.49844244029373"/>
  </node>
  <node id="68651" label="1110000110" cy:nodeId="27509">
    <graphics z="0.0" y="35.02608214202337" x="-315.43623998668045"/>
  </node>
  <node id="68650" label="1011111000" cy:nodeId="27510">
    <graphics z="0.0" y="-238.02241410431452" x="-473.6214244654402"/>
  </node>
  <node id="68649" label="0100101000" cy:nodeId="27511">
    <graphics z="0.0" y="92.96173582854681" x="-1291.9337222864851"/>
  </node>
  <node id="68648" label="0010100100" cy:nodeId="27512">
    <graphics z="0.0" y="-102.94038666901179" x="-1139.816389827989"/>
  </node>
  <node id="68647" label="0010000110" cy:nodeId="27513">
    <graphics z="0.0" y="-58.30758179840632" x="-1202.9357135584578"/>
  </node>
  <node id="68646" label="1110000100" cy:nodeId="27514">
    <graphics z="0.0" y="267.8467455941718" x="-419.1486633112654"/>
  </node>
  <node id="68645" label="1010100100" cy:nodeId="27515">
    <graphics z="0.0" y="-53.26713074860163" x="-492.0930698206648"/>
  </node>
  <node id="68644" label="1010000110" cy:nodeId="27516">
    <graphics z="0.0" y="43.36702452483587" x="-473.8625934412703"/>
  </node>
  <node id="68643" label="1100101000" cy:nodeId="27517">
    <graphics z="0.0" y="49.020619495538995" x="-119.48694494273514"/>
  </node>
  <node id="68642" label="1010101000" cy:nodeId="27518">
    <graphics z="0.0" y="15.966893299249932" x="-300.6377475550398"/>
  </node>
  <node id="68641" label="1001101000" cy:nodeId="27519">
    <graphics z="0.0" y="-32.622691051336005" x="-302.16573217418045"/>
  </node>
  <node id="68640" label="1000101000" cy:nodeId="27520">
    <graphics z="0.0" y="146.88965330901556" x="-342.889990597032"/>
  </node>
  <node id="68639" label="0010101000" cy:nodeId="27521">
    <graphics z="0.0" y="-118.1179303091485" x="-1026.5892398646101"/>
  </node>
  <node id="68638" label="0001101000" cy:nodeId="27522">
    <graphics z="0.0" y="50.34000120940618" x="-1173.0353381922469"/>
  </node>
  <node id="68637" label="0000101000" cy:nodeId="27523">
    <graphics z="0.0" y="18.417882068781182" x="-1255.9082610895857"/>
  </node>
  <node id="68636" label="0101111000" cy:nodeId="27524">
    <graphics z="0.0" y="120.66824827971868" x="-1068.3246219446883"/>
  </node>
  <node id="68635" label="1101111000" cy:nodeId="27525">
    <graphics z="0.0" y="-66.96432770905085" x="-317.1228244593367"/>
  </node>
  <node id="68634" label="0111101000" cy:nodeId="27526">
    <graphics z="0.0" y="129.18002806487493" x="-1088.1962650110945"/>
  </node>
  <node id="68633" label="0111001010" cy:nodeId="27527">
    <graphics z="0.0" y="332.8496447640937" x="-1096.2897403528914"/>
  </node>
  <node id="68632" label="0111001000" cy:nodeId="27528">
    <graphics z="0.0" y="119.01916991057806" x="-842.5107486536726"/>
  </node>
  <node id="68631" label="0101000100" cy:nodeId="27529">
    <graphics z="0.0" y="85.00528441253118" x="-1196.8012836268172"/>
  </node>
  <node id="68630" label="0100100100" cy:nodeId="27530">
    <graphics z="0.0" y="98.37418089690618" x="-1175.3621356775984"/>
  </node>
  <node id="68629" label="0100000110" cy:nodeId="27531">
    <graphics z="0.0" y="48.08286009612493" x="-1239.443276195787"/>
  </node>
  <node id="68628" label="0100000100" cy:nodeId="27532">
    <graphics z="0.0" y="-59.26354493317194" x="-1250.141732960008"/>
  </node>
  <node id="68627" label="0001111000" cy:nodeId="27533">
    <graphics z="0.0" y="20.48347960296087" x="-1331.92623785045"/>
  </node>
  <node id="68626" label="1111101000" cy:nodeId="27534">
    <graphics z="0.0" y="-137.71018494782038" x="-102.97489049937576"/>
  </node>
  <node id="68625" label="1111001010" cy:nodeId="27535">
    <graphics z="0.0" y="-178.25838245567866" x="-420.4518096735701"/>
  </node>
  <node id="68624" label="1101000100" cy:nodeId="27536">
    <graphics z="0.0" y="116.43268309417181" x="-388.0811107447371"/>
  </node>
  <node id="68623" label="1100100100" cy:nodeId="27537">
    <graphics z="0.0" y="207.9752856332343" x="-232.60513952281326"/>
  </node>
  <node id="68622" label="1100000110" cy:nodeId="27538">
    <graphics z="0.0" y="190.03885374846868" x="-283.2827365687117"/>
  </node>
  <node id="68621" label="1001111000" cy:nodeId="27539">
    <graphics z="0.0" y="35.59647093596868" x="-553.1741092493758"/>
  </node>
  <node id="68620" label="0011001010" cy:nodeId="27540">
    <graphics z="0.0" y="98.59564696135931" x="-1247.3971965601668"/>
  </node>
  <node id="68619" label="0011001000" cy:nodeId="27541">
    <graphics z="0.0" y="-75.01748170075007" x="-917.6433170130476"/>
  </node>
  <node id="68618" label="0010000100" cy:nodeId="27542">
    <graphics z="0.0" y="-211.94451321777888" x="-1069.148306637071"/>
  </node>
  <node id="68617" label="0001000100" cy:nodeId="27543">
    <graphics z="0.0" y="-281.66041459259577" x="-1243.9056661417708"/>
  </node>
  <node id="68616" label="0000100100" cy:nodeId="27544">
    <graphics z="0.0" y="-221.6615446966607" x="-1341.3623493006453"/>
  </node>
  <node id="68615" label="0000000110" cy:nodeId="27545">
    <graphics z="0.0" y="-177.0307492178399" x="-1433.768667965196"/>
  </node>
  <node id="68614" label="0000000100" cy:nodeId="27546">
    <graphics z="0.0" y="-258.56690873322077" x="-1236.669661312364"/>
  </node>
  <node id="68613" label="1111001000" cy:nodeId="27547">
    <graphics z="0.0" y="-149.5949810903985" x="-452.9774377634749"/>
  </node>
  <node id="68612" label="1011001010" cy:nodeId="27548">
    <graphics z="0.0" y="-216.31174363312311" x="-464.6173541834578"/>
  </node>
  <node id="68611" label="1011001000" cy:nodeId="27549">
    <graphics z="0.0" y="0.9053698617499322" x="-532.8296268275008"/>
  </node>
  <node id="68610" label="1100000100" cy:nodeId="27550">
    <graphics z="0.0" y="339.1406603890937" x="-395.42373540904373"/>
  </node>
  <node id="68609" label="1010000100" cy:nodeId="27551">
    <graphics z="0.0" y="293.4590197640937" x="-562.045752315782"/>
  </node>
  <node id="68608" label="1001000100" cy:nodeId="27552">
    <graphics z="0.0" y="206.23599730315618" x="-539.3397586634383"/>
  </node>
  <node id="68607" label="1000100100" cy:nodeId="27553">
    <graphics z="0.0" y="140.0094653207343" x="-390.0940578272566"/>
  </node>
  <node id="68606" label="1000000110" cy:nodeId="27554">
    <graphics z="0.0" y="171.53244505706243" x="-448.2989242365584"/>
  </node>
  <node id="68605" label="1000000100" cy:nodeId="27555">
    <graphics z="0.0" y="160.3341723519843" x="-477.95782354380935"/>
  </node>
  <node id="68604" label="0101101000" cy:nodeId="27556">
    <graphics z="0.0" y="118.68463621917181" x="-1055.3068607142195"/>
  </node>
  <node id="68603" label="0101001010" cy:nodeId="27557">
    <graphics z="0.0" y="200.55887327971868" x="-1109.4483096888289"/>
  </node>
  <node id="68602" label="0110111000" cy:nodeId="27558">
    <graphics z="0.0" y="-275.3280056875665" x="-1193.9212367823347"/>
  </node>
  <node id="68601" label="1101101000" cy:nodeId="27559">
    <graphics z="0.0" y="-24.626826183171943" x="-69.00870397593826"/>
  </node>
  <node id="68600" label="1101001010" cy:nodeId="27560">
    <graphics z="0.0" y="74.46193419280462" x="-213.62677648570389"/>
  </node>
  <node id="68599" label="1110111000" cy:nodeId="27561">
    <graphics z="0.0" y="-87.02008332428522" x="-254.14195898082107"/>
  </node>
  <node id="68598" label="0001001010" cy:nodeId="27562">
    <graphics z="0.0" y="-19.53769959625788" x="-1074.3024967005476"/>
  </node>
  <node id="68597" label="0010111000" cy:nodeId="27563">
    <graphics z="0.0" y="-250.7379025381524" x="-1053.9761112025008"/>
  </node>
  <node id="68596" label="1001001010" cy:nodeId="27564">
    <graphics z="0.0" y="-26.76395692047663" x="-386.4465205958113"/>
  </node>
  <node id="68595" label="1010111000" cy:nodeId="27565">
    <graphics z="0.0" y="-33.06728638825007" x="-428.7115524103865"/>
  </node>
  <node id="68594" label="0100111000" cy:nodeId="27566">
    <graphics z="0.0" y="36.78839598479681" x="-1332.7810428431258"/>
  </node>
  <node id="68593" label="1100111000" cy:nodeId="27567">
    <graphics z="0.0" y="49.17877684417181" x="-318.9043872645125"/>
  </node>
  <node id="68592" label="0110001010" cy:nodeId="27568">
    <graphics z="0.0" y="234.7106371957343" x="-1171.7511356165633"/>
  </node>
  <node id="68591" label="0110001000" cy:nodeId="27569">
    <graphics z="0.0" y="84.00064574065618" x="-1026.0902469446883"/>
  </node>
  <node id="68590" label="0000111000" cy:nodeId="27570">
    <graphics z="0.0" y="-129.66808594879694" x="-1266.944083957933"/>
  </node>
  <node id="68589" label="1110001010" cy:nodeId="27571">
    <graphics z="0.0" y="-83.47580994782038" x="-325.6359775355086"/>
  </node>
  <node id="68588" label="1000111000" cy:nodeId="27572">
    <graphics z="0.0" y="198.28812132659368" x="-371.8291538050398"/>
  </node>
  <node id="68587" label="0010001010" cy:nodeId="27573">
    <graphics z="0.0" y="-42.00210084137507" x="-1278.9375636866316"/>
  </node>
  <node id="68586" label="0010001000" cy:nodeId="27574">
    <graphics z="0.0" y="-233.02421082672663" x="-1031.6376102259383"/>
  </node>
  <node id="68585" label="1110001000" cy:nodeId="27575">
    <graphics z="0.0" y="32.34433470549993" x="-298.8466708948836"/>
  </node>
  <node id="68584" label="1010001010" cy:nodeId="27576">
    <graphics z="0.0" y="10.108998401788995" x="-317.0002353480086"/>
  </node>
  <node id="68583" label="1010001000" cy:nodeId="27577">
    <graphics z="0.0" y="95.86264525237493" x="-497.35537221934646"/>
  </node>
  <node id="68582" label="1111011000" cy:nodeId="27578">
    <graphics z="0.0" y="-147.24943055328913" x="-398.8932407191023"/>
  </node>
  <node id="68581" label="1111010010" cy:nodeId="27579">
    <graphics z="0.0" y="-300.99928559479304" x="-574.391440181993"/>
  </node>
  <node id="68580" label="1111010000" cy:nodeId="27580">
    <graphics z="0.0" y="-204.18572892365046" x="-598.5638339808211"/>
  </node>
  <node id="68579" label="0111011000" cy:nodeId="27581">
    <graphics z="0.0" y="5.328953846124932" x="-1020.7267215540633"/>
  </node>
  <node id="68578" label="0111010010" cy:nodeId="27582">
    <graphics z="0.0" y="257.3571215707343" x="-1329.338476925157"/>
  </node>
  <node id="68577" label="0111010000" cy:nodeId="27583">
    <graphics z="0.0" y="-57.054026500554755" x="-1146.8822009852156"/>
  </node>
  <node id="68576" label="0011011000" cy:nodeId="27584">
    <graphics z="0.0" y="-248.75803651032038" x="-1070.6313236048445"/>
  </node>
  <node id="68575" label="0011010010" cy:nodeId="27585">
    <graphics z="0.0" y="95.25424681487493" x="-1216.597338466905"/>
  </node>
  <node id="68574" label="0011010000" cy:nodeId="27586">
    <graphics z="0.0" y="-255.44491089996882" x="-1174.2877643397078"/>
  </node>
  <node id="68573" label="1011011000" cy:nodeId="27587">
    <graphics z="0.0" y="-86.74938477692194" x="-651.3753116419539"/>
  </node>
  <node id="68572" label="1011010010" cy:nodeId="27588">
    <graphics z="0.0" y="-259.8592404287774" x="-732.7644107630476"/>
  </node>
  <node id="68571" label="1011010000" cy:nodeId="27589">
    <graphics z="0.0" y="-160.11774720367976" x="-738.2297122767195"/>
  </node>
  <node id="68570" label="0101001000" cy:nodeId="27590">
    <graphics z="0.0" y="257.4357043344062" x="-1088.375113277696"/>
  </node>
  <node id="68569" label="0100001010" cy:nodeId="27591">
    <graphics z="0.0" y="152.34647093596868" x="-966.6251590540633"/>
  </node>
  <node id="68568" label="0100001000" cy:nodeId="27592">
    <graphics z="0.0" y="59.07651243987493" x="-1100.4408023646101"/>
  </node>
  <node id="68567" label="1101001000" cy:nodeId="27593">
    <graphics z="0.0" y="25.597279651788995" x="-257.112402706407"/>
  </node>
  <node id="68566" label="1100001010" cy:nodeId="27594">
    <graphics z="0.0" y="100.62457762542181" x="-336.0576160242781"/>
  </node>
  <node id="68565" label="0001001000" cy:nodeId="27595">
    <graphics z="0.0" y="31.542698963312432" x="-1043.0111758997664"/>
  </node>
  <node id="68564" label="0000001010" cy:nodeId="27596">
    <graphics z="0.0" y="35.31540404143743" x="-1132.963576107286"/>
  </node>
  <node id="68563" label="0000001000" cy:nodeId="27597">
    <graphics z="0.0" y="-187.95287598785944" x="-1140.7745654871687"/>
  </node>
  <node id="68562" label="1100001000" cy:nodeId="27598">
    <graphics z="0.0" y="128.16684447112493" x="-272.07027318980545"/>
  </node>
  <node id="68561" label="1001001000" cy:nodeId="27599">
    <graphics z="0.0" y="34.30617247405462" x="-468.38220479991287"/>
  </node>
  <node id="68560" label="1000001010" cy:nodeId="27600">
    <graphics z="0.0" y="180.47253905120306" x="-380.5633456995711"/>
  </node>
  <node id="68559" label="1000001000" cy:nodeId="27601">
    <graphics z="0.0" y="257.35849486174993" x="-553.7181766321883"/>
  </node>
  <node id="68558" label="0101011000" cy:nodeId="27602">
    <graphics z="0.0" y="57.17163573089056" x="-1088.5229251673445"/>
  </node>
  <node id="68557" label="0101010010" cy:nodeId="27603">
    <graphics z="0.0" y="120.78467284026556" x="-1334.2762439539656"/>
  </node>
  <node id="68556" label="1101011000" cy:nodeId="27604">
    <graphics z="0.0" y="-28.887461559148505" x="-442.2072742274031"/>
  </node>
  <node id="68555" label="1101010010" cy:nodeId="27605">
    <graphics z="0.0" y="-252.4437588613946" x="-522.0235278895125"/>
  </node>
  <node id="68554" label="0001011000" cy:nodeId="27606">
    <graphics z="0.0" y="-199.4895695608575" x="-1207.1804149439558"/>
  </node>
  <node id="68553" label="0001010010" cy:nodeId="27607">
    <graphics z="0.0" y="-33.165476695867255" x="-1416.1962650110945"/>
  </node>
  <node id="68552" label="1001011000" cy:nodeId="27608">
    <graphics z="0.0" y="-40.495676891179755" x="-596.9162204554304"/>
  </node>
  <node id="68551" label="1001010010" cy:nodeId="27609">
    <graphics z="0.0" y="-105.56041993317194" x="-612.6413333704695"/>
  </node>
  <node id="68550" label="0110011000" cy:nodeId="27610">
    <graphics z="0.0" y="-64.22451295075007" x="-980.100683956407"/>
  </node>
  <node id="68549" label="0110010010" cy:nodeId="27611">
    <graphics z="0.0" y="246.23471556487493" x="-1082.770117550157"/>
  </node>
  <node id="68548" label="0110010000" cy:nodeId="27612">
    <graphics z="0.0" y="14.337620838312432" x="-992.5647037317976"/>
  </node>
  <node id="68547" label="0111110000" cy:nodeId="27613">
    <graphics z="0.0" y="-39.664561168523505" x="-1344.2072208216414"/>
  </node>
  <node id="68546" label="1110011000" cy:nodeId="27614">
    <graphics z="0.0" y="-217.72300233063288" x="-382.8191249659285"/>
  </node>
  <node id="68545" label="1110010010" cy:nodeId="27615">
    <graphics z="0.0" y="-135.6074208181817" x="-609.9888370325789"/>
  </node>
  <node id="68544" label="1110010000" cy:nodeId="27616">
    <graphics z="0.0" y="-72.87066163239069" x="-577.6448428919539"/>
  </node>
  <node id="68543" label="1111110000" cy:nodeId="27617">
    <graphics z="0.0" y="-260.30541505035944" x="-359.1189182093367"/>
  </node>
  <node id="68542" label="0010011000" cy:nodeId="27618">
    <graphics z="0.0" y="-268.9087361257989" x="-920.8141849329695"/>
  </node>
  <node id="68541" label="0010010010" cy:nodeId="27619">
    <graphics z="0.0" y="-31.91752137360163" x="-1286.51608160045"/>
  </node>
  <node id="68540" label="0010010000" cy:nodeId="27620">
    <graphics z="0.0" y="-261.34980286774226" x="-1009.2351138880476"/>
  </node>
  <node id="68539" label="0011110000" cy:nodeId="27621">
    <graphics z="0.0" y="3.5539752084296197" x="-1353.8029239466414"/>
  </node>
  <node id="68538" label="1010011000" cy:nodeId="27622">
    <graphics z="0.0" y="3.6062823373358697" x="-631.6141574671492"/>
  </node>
  <node id="68537" label="1010010010" cy:nodeId="27623">
    <graphics z="0.0" y="-216.12661256012507" x="-646.887289791368"/>
  </node>
  <node id="68536" label="1010010000" cy:nodeId="27624">
    <graphics z="0.0" y="-93.7529629629571" x="-723.9074771692976"/>
  </node>
  <node id="68535" label="1011110000" cy:nodeId="27625">
    <graphics z="0.0" y="-190.9392022055108" x="-653.4299228480086"/>
  </node>
  <node id="68534" label="0101010000" cy:nodeId="27626">
    <graphics z="0.0" y="4.504521473078057" x="-1121.1097934534773"/>
  </node>
  <node id="68533" label="0100011000" cy:nodeId="27627">
    <graphics z="0.0" y="-166.56301774200983" x="-1032.7487399866804"/>
  </node>
  <node id="68532" label="0100010010" cy:nodeId="27628">
    <graphics z="0.0" y="78.14096556487493" x="-1358.0500247767195"/>
  </node>
  <node id="68531" label="0100010000" cy:nodeId="27629">
    <graphics z="0.0" y="-50.427134410711005" x="-1090.6225955775008"/>
  </node>
  <node id="68530" label="0101110000" cy:nodeId="27630">
    <graphics z="0.0" y="-50.03823365387507" x="-1388.3657443812117"/>
  </node>
  <node id="68529" label="1101010000" cy:nodeId="27631">
    <graphics z="0.0" y="-52.113596813054755" x="-550.317480831407"/>
  </node>
  <node id="68528" label="1100011000" cy:nodeId="27632">
    <graphics z="0.0" y="-197.31665696320124" x="-537.0958545496687"/>
  </node>
  <node id="68527" label="1100010010" cy:nodeId="27633">
    <graphics z="0.0" y="-207.62814416107722" x="-506.18318822886795"/>
  </node>
  <node id="68526" label="1100010000" cy:nodeId="27634">
    <graphics z="0.0" y="72.14780150237493" x="-526.2992923548445"/>
  </node>
  <node id="68525" label="1101110000" cy:nodeId="27635">
    <graphics z="0.0" y="-14.203425304265693" x="-455.9742648890242"/>
  </node>
  <node id="68524" label="0001010000" cy:nodeId="27636">
    <graphics z="0.0" y="-210.5734385412652" x="-1229.3179309656844"/>
  </node>
  <node id="68523" label="0000011000" cy:nodeId="27637">
    <graphics z="0.0" y="-274.0761593740899" x="-1034.0908115198836"/>
  </node>
  <node id="68522" label="0000010010" cy:nodeId="27638">
    <graphics z="0.0" y="-150.9618710440118" x="-1227.5126750757918"/>
  </node>
  <node id="68521" label="0000010000" cy:nodeId="27639">
    <graphics z="0.0" y="-301.7777432363946" x="-1196.5039966395125"/>
  </node>
  <node id="68520" label="0011100000" cy:nodeId="27640">
    <graphics z="0.0" y="164.26694212737493" x="-1037.3915012171492"/>
  </node>
  <node id="68519" label="0001110000" cy:nodeId="27641">
    <graphics z="0.0" y="-140.06662263092585" x="-1439.8211734583601"/>
  </node>
  <node id="68518" label="1001010000" cy:nodeId="27642">
    <graphics z="0.0" y="11.07619200530462" x="-708.8091495325789"/>
  </node>
  <node id="68517" label="1000011000" cy:nodeId="27643">
    <graphics z="0.0" y="125.25244627776556" x="-637.6648624232039"/>
  </node>
  <node id="68516" label="1000010010" cy:nodeId="27644">
    <graphics z="0.0" y="-108.70402039703913" x="-692.0141513636336"/>
  </node>
  <node id="68515" label="1000010000" cy:nodeId="27645">
    <graphics z="0.0" y="78.56116209807806" x="-679.6154086878523"/>
  </node>
  <node id="68514" label="1011100000" cy:nodeId="27646">
    <graphics z="0.0" y="-108.02019776520319" x="-440.8083598902449"/>
  </node>
  <node id="68513" label="1001110000" cy:nodeId="27647">
    <graphics z="0.0" y="-44.77218140778132" x="-561.707503109239"/>
  </node>
  <node id="68512" label="0110110000" cy:nodeId="27648">
    <graphics z="0.0" y="-48.041331188054755" x="-1152.3413684656844"/>
  </node>
  <node id="68511" label="0110100000" cy:nodeId="27649">
    <graphics z="0.0" y="155.46933470549993" x="-1124.5681064417586"/>
  </node>
  <node id="68510" label="1110110000" cy:nodeId="27650">
    <graphics z="0.0" y="-103.72419251617976" x="-372.0232684900984"/>
  </node>
  <node id="68509" label="0010110000" cy:nodeId="27651">
    <graphics z="0.0" y="-253.54630555328913" x="-1224.0817210962996"/>
  </node>
  <node id="68508" label="1110100000" cy:nodeId="27652">
    <graphics z="0.0" y="-122.24857606110163" x="-325.3864734461531"/>
  </node>
  <node id="68507" label="1010110000" cy:nodeId="27653">
    <graphics z="0.0" y="-110.73008240875788" x="-559.8395908167586"/>
  </node>
  <node id="68506" label="0100110000" cy:nodeId="27654">
    <graphics z="0.0" y="66.98184691253118" x="-1276.7224834254012"/>
  </node>
  <node id="68505" label="0100100000" cy:nodeId="27655">
    <graphics z="0.0" y="408.12534056487493" x="-1302.498919277452"/>
  </node>
  <node id="68504" label="1100110000" cy:nodeId="27656">
    <graphics z="0.0" y="-51.39373292145319" x="-326.5471179774031"/>
  </node>
  <node id="68503" label="0010100000" cy:nodeId="27657">
    <graphics z="0.0" y="0.39842711272649467" x="-1181.0858524134383"/>
  </node>
  <node id="68502" label="0001100000" cy:nodeId="27658">
    <graphics z="0.0" y="-126.77308930573054" x="-1255.1108310511336"/>
  </node>
  <node id="68501" label="0000110000" cy:nodeId="27659">
    <graphics z="0.0" y="-94.72269715485163" x="-1348.2556522181258"/>
  </node>
  <node id="68500" label="0000100000" cy:nodeId="27660">
    <graphics z="0.0" y="-13.322962657781318" x="-1383.7369907191023"/>
  </node>
  <node id="68499" label="1100100000" cy:nodeId="27661">
    <graphics z="0.0" y="19.913518055109307" x="-213.39119604136795"/>
  </node>
  <node id="68498" label="1010100000" cy:nodeId="27662">
    <graphics z="0.0" y="-161.25741471466608" x="-387.3537128260359"/>
  </node>
  <node id="68497" label="1001100000" cy:nodeId="27663">
    <graphics z="0.0" y="-57.22273530182429" x="-416.6731632044539"/>
  </node>
  <node id="68496" label="1000110000" cy:nodeId="27664">
    <graphics z="0.0" y="76.32007323089056" x="-440.6200588038191"/>
  </node>
  <node id="68495" label="1000100000" cy:nodeId="27665">
    <graphics z="0.0" y="-75.00969208893366" x="-465.46203306224197"/>
  </node>
  <node id="68494" label="0111100000" cy:nodeId="27666">
    <graphics z="0.0" y="293.11179076018743" x="-1196.3088977625594"/>
  </node>
  <node id="68493" label="0111000010" cy:nodeId="27667">
    <graphics z="0.0" y="351.04916868987493" x="-1214.495028286241"/>
  </node>
  <node id="68492" label="0111000000" cy:nodeId="27668">
    <graphics z="0.0" y="239.69827757659368" x="-1091.5125034144148"/>
  </node>
  <node id="68491" label="1111100000" cy:nodeId="27669">
    <graphics z="0.0" y="30.39784727874212" x="-258.4382236292586"/>
  </node>
  <node id="68490" label="1111000010" cy:nodeId="27670">
    <graphics z="0.0" y="-219.67880524811335" x="-375.8536594202742"/>
  </node>
  <node id="68489" label="0011000010" cy:nodeId="27671">
    <graphics z="0.0" y="25.61562071624212" x="-1188.2757938196883"/>
  </node>
  <node id="68488" label="0011000000" cy:nodeId="27672">
    <graphics z="0.0" y="-6.643626109929755" x="-1045.0382907679304"/>
  </node>
  <node id="68487" label="1111000000" cy:nodeId="27673">
    <graphics z="0.0" y="-77.37953461823054" x="-453.8818118860945"/>
  </node>
  <node id="68486" label="1011000010" cy:nodeId="27674">
    <graphics z="0.0" y="-128.05021943268366" x="-587.6581943323836"/>
  </node>
  <node id="68485" label="1011000000" cy:nodeId="27675">
    <graphics z="0.0" y="-92.33339966950007" x="-560.644255428575"/>
  </node>
  <node id="68484" label="0101100000" cy:nodeId="27676">
    <graphics z="0.0" y="120.82166014495306" x="-1242.52287557628"/>
  </node>
  <node id="68483" label="0101000010" cy:nodeId="27677">
    <graphics z="0.0" y="261.3938342172187" x="-1281.6402328303084"/>
  </node>
  <node id="68482" label="1101100000" cy:nodeId="27678">
    <graphics z="0.0" y="-50.59664429840632" x="-227.68697240855545"/>
  </node>
  <node id="68481" label="1101000010" cy:nodeId="27679">
    <graphics z="0.0" y="-102.62199677643366" x="-414.24518850352615"/>
  </node>
  <node id="68480" label="1001000010" cy:nodeId="27680">
    <graphics z="0.0" y="75.88135252776556" x="-455.4798515131697"/>
  </node>
  <node id="68479" label="0001000010" cy:nodeId="27681">
    <graphics z="0.0" y="97.63226805510931" x="-1377.7279575159773"/>
  </node>
  <node id="68478" label="0110000010" cy:nodeId="27682">
    <graphics z="0.0" y="343.1931506234687" x="-1260.3094642451033"/>
  </node>
  <node id="68477" label="0110000000" cy:nodeId="27683">
    <graphics z="0.0" y="249.46628294768743" x="-1137.413328914903"/>
  </node>
  <node id="68476" label="1110000010" cy:nodeId="27684">
    <graphics z="0.0" y="-13.733897106023505" x="-354.81809881236404"/>
  </node>
  <node id="68475" label="0010000010" cy:nodeId="27685">
    <graphics z="0.0" y="78.48691283049993" x="-1445.7681949427351"/>
  </node>
  <node id="68474" label="0010000000" cy:nodeId="27686">
    <graphics z="0.0" y="-120.00494660553522" x="-1200.1003940394148"/>
  </node>
  <node id="68473" label="1110000000" cy:nodeId="27687">
    <graphics z="0.0" y="86.40759764495306" x="-524.2558887293562"/>
  </node>
  <node id="68472" label="1010000010" cy:nodeId="27688">
    <graphics z="0.0" y="-105.63696564850397" x="-473.0271632960066"/>
  </node>
  <node id="68471" label="1010000000" cy:nodeId="27689">
    <graphics z="0.0" y="-69.84657563385554" x="-600.0587375452742"/>
  </node>
  <node id="68470" label="0101000000" cy:nodeId="27690">
    <graphics z="0.0" y="152.56070433440618" x="-1269.3438861658797"/>
  </node>
  <node id="68469" label="0100000010" cy:nodeId="27691">
    <graphics z="0.0" y="211.8784838754218" x="-1230.3832042505965"/>
  </node>
  <node id="68468" label="0100000000" cy:nodeId="27692">
    <graphics z="0.0" y="180.22018919768743" x="-1287.357130794786"/>
  </node>
  <node id="68467" label="1101000000" cy:nodeId="27693">
    <graphics z="0.0" y="152.08145628753118" x="-476.25427511241287"/>
  </node>
  <node id="68466" label="1100000010" cy:nodeId="27694">
    <graphics z="0.0" y="68.96097288909368" x="-489.15968206431717"/>
  </node>
  <node id="68465" label="1100000000" cy:nodeId="27695">
    <graphics z="0.0" y="117.10797606292181" x="-429.8886935999617"/>
  </node>
  <node id="68464" label="1001000000" cy:nodeId="27696">
    <graphics z="0.0" y="121.35645018401556" x="-596.8285281946883"/>
  </node>
  <node id="68463" label="1000000010" cy:nodeId="27697">
    <graphics z="0.0" y="55.81491576018743" x="-440.7913568308577"/>
  </node>
  <node id="68462" label="1000000000" cy:nodeId="27698">
    <graphics z="0.0" y="139.50308714690618" x="-534.9524982264265"/>
  </node>
  <node id="68461" label="0001000000" cy:nodeId="27699">
    <graphics z="0.0" y="28.479283435968682" x="-1289.4478557398543"/>
  </node>
  <node id="68460" label="0000000010" cy:nodeId="27700">
    <graphics z="0.0" y="130.61392699065618" x="-1381.2428348353133"/>
  </node>
  <node id="68459" label="0000000000" cy:nodeId="27701">
    <graphics z="0.0" y="-164.11535920319147" x="-1248.8748615076765"/>
  </node>
</graph>
