# Supplementary material
Source: publisher figshare collection journal article supplement (https://springernature.figshare.com/ndownloader/files/17562821)
Supplement: Supplementary file 1 [file 17562821 › CytoscapeSession-2018_09_25-21_15/views/37972-73579-STG%2C+Model+1.xgmml]

<?xml version="1.0" encoding="UTF-8" standalone="yes"?>
<graph id="73579" label="STG, Model 1" cy:view="1" cy:networkId="37972" cy:visualStyle="Directed" cy:rendererId="org.cytoscape.ding" cy:documentVersion="3.0" xmlns:dc="http://purl.org/dc/elements/1.1/" xmlns:xlink="http://www.w3.org/1999/xlink" xmlns:rdf="http://www.w3.org/1999/02/22-rdf-syntax-ns#" xmlns:cy="http://www.cytoscape.org" xmlns="http://www.cs.rpi.edu/XGMML">
  <graphics>
    <att name="NETWORK_TITLE" value="STG, Model 1" type="string" cy:type="String"/>
    <att name="NETWORK_EDGE_SELECTION" value="true" type="string" cy:type="String"/>
    <att name="NETWORK_WIDTH" value="1193.0" type="string" cy:type="String"/>
    <att name="NETWORK_NODE_SELECTION" value="true" type="string" cy:type="String"/>
    <att name="NETWORK_CENTER_Z_LOCATION" value="0.0" type="string" cy:type="String"/>
    <att name="NETWORK_CENTER_X_LOCATION" value="159.00297212275356" type="string" cy:type="String"/>
    <att name="NETWORK_SCALE_FACTOR" value="0.2360588684466894" type="string" cy:type="String"/>
    <att name="NETWORK_DEPTH" value="0.0" type="string" cy:type="String"/>
    <att name="NETWORK_HEIGHT" value="501.0" type="string" cy:type="String"/>
    <att name="NETWORK_CENTER_Y_LOCATION" value="-46.35178348886232" type="string" cy:type="String"/>
  </graphics>
  <node id="73691" label="0100001010" cy:nodeId="38895">
    <graphics z="0.0" y="995.33203125" x="1461.482421875"/>
  </node>
  <node id="73690" label="0100001000" cy:nodeId="38896">
    <graphics z="0.0" y="805.33203125" x="1514.482421875"/>
  </node>
  <node id="73689" label="1101001000" cy:nodeId="38897">
    <graphics z="0.0" y="921.33203125" x="-304.517578125"/>
  </node>
  <node id="73688" label="1100001010" cy:nodeId="38898">
    <graphics z="0.0" y="992.33203125" x="-459.517578125"/>
  </node>
  <node id="73687" label="0001001000" cy:nodeId="38899">
    <graphics z="0.0" y="681.33203125" x="1257.482421875"/>
  </node>
  <node id="73686" label="0000001010" cy:nodeId="38900">
    <graphics z="0.0" y="1073.33203125" x="1125.482421875"/>
  </node>
  <node id="73685" label="0000001000" cy:nodeId="38901">
    <graphics z="0.0" y="758.33203125" x="1346.482421875"/>
  </node>
  <node id="73684" label="1100001000" cy:nodeId="38902">
    <graphics z="0.0" y="768.33203125" x="-114.517578125"/>
  </node>
  <node id="73683" label="1001001000" cy:nodeId="38903">
    <graphics z="0.0" y="743.33203125" x="-554.517578125"/>
  </node>
  <node id="73682" label="1000001010" cy:nodeId="38904">
    <graphics z="0.0" y="666.33203125" x="-510.517578125"/>
  </node>
  <node id="73681" label="1000001000" cy:nodeId="38905">
    <graphics z="0.0" y="600.33203125" x="-165.517578125"/>
  </node>
  <node id="73680" label="0101011000" cy:nodeId="38906">
    <graphics z="0.0" y="395.33203125" x="1324.482421875"/>
  </node>
  <node id="73679" label="0101010010" cy:nodeId="38907">
    <graphics z="0.0" y="383.33203125" x="778.482421875"/>
  </node>
  <node id="73678" label="1101011000" cy:nodeId="38908">
    <graphics z="0.0" y="502.33203125" x="-393.517578125"/>
  </node>
  <node id="73677" label="1101010010" cy:nodeId="38909">
    <graphics z="0.0" y="274.33203125" x="-937.517578125"/>
  </node>
  <node id="73676" label="0001011000" cy:nodeId="38910">
    <graphics z="0.0" y="363.33203125" x="1032.482421875"/>
  </node>
  <node id="73675" label="0001010010" cy:nodeId="38911">
    <graphics z="0.0" y="455.33203125" x="644.482421875"/>
  </node>
  <node id="73674" label="1001011000" cy:nodeId="38912">
    <graphics z="0.0" y="347.33203125" x="-577.517578125"/>
  </node>
  <node id="73673" label="1001010010" cy:nodeId="38913">
    <graphics z="0.0" y="149.33203125" x="-1042.517578125"/>
  </node>
  <node id="73672" label="0110011000" cy:nodeId="38914">
    <graphics z="0.0" y="314.33203125" x="1210.482421875"/>
  </node>
  <node id="73671" label="0110010010" cy:nodeId="38915">
    <graphics z="0.0" y="217.33203125" x="727.482421875"/>
  </node>
  <node id="73670" label="0110010000" cy:nodeId="38916">
    <graphics z="0.0" y="97.33203125" x="1008.482421875"/>
  </node>
  <node id="73669" label="0111110000" cy:nodeId="38917">
    <graphics z="0.0" y="233.33203125" x="508.482421875"/>
  </node>
  <node id="73668" label="1110011000" cy:nodeId="38918">
    <graphics z="0.0" y="456.33203125" x="-245.517578125"/>
  </node>
  <node id="73667" label="1110010010" cy:nodeId="38919">
    <graphics z="0.0" y="271.33203125" x="-698.517578125"/>
  </node>
  <node id="73666" label="1110010000" cy:nodeId="38920">
    <graphics z="0.0" y="210.33203125" x="-351.517578125"/>
  </node>
  <node id="73665" label="1111110000" cy:nodeId="38921">
    <graphics z="0.0" y="414.33203125" x="-951.517578125"/>
  </node>
  <node id="73664" label="0010011000" cy:nodeId="38922">
    <graphics z="0.0" y="175.33203125" x="1200.482421875"/>
  </node>
  <node id="73663" label="0010010010" cy:nodeId="38923">
    <graphics z="0.0" y="279.33203125" x="668.482421875"/>
  </node>
  <node id="73662" label="0010010000" cy:nodeId="38924">
    <graphics z="0.0" y="57.33203125" x="875.482421875"/>
  </node>
  <node id="73661" label="0011110000" cy:nodeId="38925">
    <graphics z="0.0" y="250.33203125" x="316.482421875"/>
  </node>
  <node id="73660" label="1010011000" cy:nodeId="38926">
    <graphics z="0.0" y="416.33203125" x="-400.517578125"/>
  </node>
  <node id="73659" label="1010010010" cy:nodeId="38927">
    <graphics z="0.0" y="123.33203125" x="-909.517578125"/>
  </node>
  <node id="73658" label="1010010000" cy:nodeId="38928">
    <graphics z="0.0" y="63.33203125" x="-570.517578125"/>
  </node>
  <node id="73657" label="1011110000" cy:nodeId="38929">
    <graphics z="0.0" y="299.33203125" x="-1183.517578125"/>
  </node>
  <node id="73656" label="0101010000" cy:nodeId="38930">
    <graphics z="0.0" y="176.33203125" x="1004.482421875"/>
  </node>
  <node id="73655" label="0100011000" cy:nodeId="38931">
    <graphics z="0.0" y="495.33203125" x="1497.482421875"/>
  </node>
  <node id="73654" label="0100010010" cy:nodeId="38932">
    <graphics z="0.0" y="487.33203125" x="1095.482421875"/>
  </node>
  <node id="73653" label="0100010000" cy:nodeId="38933">
    <graphics z="0.0" y="269.33203125" x="1299.482421875"/>
  </node>
  <node id="73652" label="0101110000" cy:nodeId="38934">
    <graphics z="0.0" y="351.33203125" x="629.482421875"/>
  </node>
  <node id="73651" label="1101010000" cy:nodeId="38935">
    <graphics z="0.0" y="128.33203125" x="-540.517578125"/>
  </node>
  <node id="73650" label="1100011000" cy:nodeId="38936">
    <graphics z="0.0" y="499.33203125" x="-111.517578125"/>
  </node>
  <node id="73649" label="1100010010" cy:nodeId="38937">
    <graphics z="0.0" y="235.33203125" x="-707.517578125"/>
  </node>
  <node id="73648" label="1100010000" cy:nodeId="38938">
    <graphics z="0.0" y="174.33203125" x="-304.517578125"/>
  </node>
  <node id="73647" label="1101110000" cy:nodeId="38939">
    <graphics z="0.0" y="342.33203125" x="-870.517578125"/>
  </node>
  <node id="73646" label="0001010000" cy:nodeId="38940">
    <graphics z="0.0" y="170.33203125" x="740.482421875"/>
  </node>
  <node id="73645" label="0000011000" cy:nodeId="38941">
    <graphics z="0.0" y="359.33203125" x="1339.482421875"/>
  </node>
  <node id="73644" label="0000010010" cy:nodeId="38942">
    <graphics z="0.0" y="401.33203125" x="991.482421875"/>
  </node>
  <node id="73643" label="0000010000" cy:nodeId="38943">
    <graphics z="0.0" y="191.33203125" x="1124.482421875"/>
  </node>
  <node id="73642" label="0011100000" cy:nodeId="38944">
    <graphics z="0.0" y="565.33203125" x="253.482421875"/>
  </node>
  <node id="73641" label="0001110000" cy:nodeId="38945">
    <graphics z="0.0" y="359.33203125" x="497.482421875"/>
  </node>
  <node id="73640" label="1001010000" cy:nodeId="38946">
    <graphics z="0.0" y="57.33203125" x="-744.517578125"/>
  </node>
  <node id="73639" label="1000011000" cy:nodeId="38947">
    <graphics z="0.0" y="363.33203125" x="-286.517578125"/>
  </node>
  <node id="73638" label="1000010010" cy:nodeId="38948">
    <graphics z="0.0" y="125.33203125" x="-707.517578125"/>
  </node>
  <node id="73637" label="1000010000" cy:nodeId="38949">
    <graphics z="0.0" y="62.33203125" x="-416.517578125"/>
  </node>
  <node id="73636" label="1011100000" cy:nodeId="38950">
    <graphics z="0.0" y="619.33203125" x="-1095.517578125"/>
  </node>
  <node id="73635" label="1001110000" cy:nodeId="38951">
    <graphics z="0.0" y="238.33203125" x="-967.517578125"/>
  </node>
  <node id="73634" label="0110110000" cy:nodeId="38952">
    <graphics z="0.0" y="315.33203125" x="646.482421875"/>
  </node>
  <node id="73633" label="0110100000" cy:nodeId="38953">
    <graphics z="0.0" y="651.33203125" x="805.482421875"/>
  </node>
  <node id="73632" label="1110110000" cy:nodeId="38954">
    <graphics z="0.0" y="199.33203125" x="-586.517578125"/>
  </node>
  <node id="73631" label="0010110000" cy:nodeId="38955">
    <graphics z="0.0" y="197.33203125" x="550.482421875"/>
  </node>
  <node id="73630" label="1110100000" cy:nodeId="38956">
    <graphics z="0.0" y="707.33203125" x="-593.517578125"/>
  </node>
  <node id="73629" label="1010110000" cy:nodeId="38957">
    <graphics z="0.0" y="203.33203125" x="-820.517578125"/>
  </node>
  <node id="73628" label="0100110000" cy:nodeId="38958">
    <graphics z="0.0" y="291.33203125" x="915.482421875"/>
  </node>
  <node id="73627" label="0100100000" cy:nodeId="38959">
    <graphics z="0.0" y="633.33203125" x="923.482421875"/>
  </node>
  <node id="73626" label="1100110000" cy:nodeId="38960">
    <graphics z="0.0" y="324.33203125" x="-442.517578125"/>
  </node>
  <node id="73625" label="0010100000" cy:nodeId="38961">
    <graphics z="0.0" y="496.33203125" x="491.482421875"/>
  </node>
  <node id="73624" label="0001100000" cy:nodeId="38962">
    <graphics z="0.0" y="648.33203125" x="418.482421875"/>
  </node>
  <node id="73623" label="0000110000" cy:nodeId="38963">
    <graphics z="0.0" y="296.33203125" x="776.482421875"/>
  </node>
  <node id="73622" label="0000100000" cy:nodeId="38964">
    <graphics z="0.0" y="590.33203125" x="679.482421875"/>
  </node>
  <node id="73621" label="1100100000" cy:nodeId="38965">
    <graphics z="0.0" y="475.33203125" x="-480.517578125"/>
  </node>
  <node id="73620" label="1010100000" cy:nodeId="38966">
    <graphics z="0.0" y="455.33203125" x="-681.517578125"/>
  </node>
  <node id="73619" label="1001100000" cy:nodeId="38967">
    <graphics z="0.0" y="558.33203125" x="-900.517578125"/>
  </node>
  <node id="73618" label="1000110000" cy:nodeId="38968">
    <graphics z="0.0" y="235.33203125" x="-551.517578125"/>
  </node>
  <node id="73617" label="1000100000" cy:nodeId="38969">
    <graphics z="0.0" y="527.33203125" x="-637.517578125"/>
  </node>
  <node id="73616" label="0111100000" cy:nodeId="38970">
    <graphics z="0.0" y="552.33203125" x="462.482421875"/>
  </node>
  <node id="73615" label="0111000010" cy:nodeId="38971">
    <graphics z="0.0" y="532.33203125" x="553.482421875"/>
  </node>
  <node id="73614" label="0111000000" cy:nodeId="38972">
    <graphics z="0.0" y="363.33203125" x="895.482421875"/>
  </node>
  <node id="73613" label="1111100000" cy:nodeId="38973">
    <graphics z="0.0" y="784.33203125" x="-990.517578125"/>
  </node>
  <node id="73612" label="1111000010" cy:nodeId="38974">
    <graphics z="0.0" y="579.33203125" x="-1115.517578125"/>
  </node>
  <node id="73611" label="0011000010" cy:nodeId="38975">
    <graphics z="0.0" y="764.33203125" x="325.482421875"/>
  </node>
  <node id="73610" label="0011000000" cy:nodeId="38976">
    <graphics z="0.0" y="419.33203125" x="607.482421875"/>
  </node>
  <node id="73609" label="1111000000" cy:nodeId="38977">
    <graphics z="0.0" y="491.33203125" x="-638.517578125"/>
  </node>
  <node id="73608" label="1011000010" cy:nodeId="38978">
    <graphics z="0.0" y="465.33203125" x="-1256.517578125"/>
  </node>
  <node id="73607" label="1011000000" cy:nodeId="38979">
    <graphics z="0.0" y="378.33203125" x="-889.517578125"/>
  </node>
  <node id="73606" label="0101100000" cy:nodeId="38980">
    <graphics z="0.0" y="772.33203125" x="619.482421875"/>
  </node>
  <node id="73605" label="0101000010" cy:nodeId="38981">
    <graphics z="0.0" y="723.33203125" x="836.482421875"/>
  </node>
  <node id="73604" label="1101100000" cy:nodeId="38982">
    <graphics z="0.0" y="882.33203125" x="-890.517578125"/>
  </node>
  <node id="73603" label="1101000010" cy:nodeId="38983">
    <graphics z="0.0" y="629.33203125" x="-816.517578125"/>
  </node>
  <node id="73602" label="1001000010" cy:nodeId="38984">
    <graphics z="0.0" y="391.33203125" x="-1096.517578125"/>
  </node>
  <node id="73601" label="0001000010" cy:nodeId="38985">
    <graphics z="0.0" y="808.33203125" x="672.482421875"/>
  </node>
  <node id="73600" label="0110000010" cy:nodeId="38986">
    <graphics z="0.0" y="700.33203125" x="653.482421875"/>
  </node>
  <node id="73599" label="0110000000" cy:nodeId="38987">
    <graphics z="0.0" y="321.33203125" x="1052.482421875"/>
  </node>
  <node id="73598" label="1110000010" cy:nodeId="38988">
    <graphics z="0.0" y="671.33203125" x="-651.517578125"/>
  </node>
  <node id="73597" label="0010000010" cy:nodeId="38989">
    <graphics z="0.0" y="604.33203125" x="555.482421875"/>
  </node>
  <node id="73596" label="0010000000" cy:nodeId="38990">
    <graphics z="0.0" y="215.33203125" x="937.482421875"/>
  </node>
  <node id="73595" label="1110000000" cy:nodeId="38991">
    <graphics z="0.0" y="528.33203125" x="-227.517578125"/>
  </node>
  <node id="73594" label="1010000010" cy:nodeId="38992">
    <graphics z="0.0" y="486.33203125" x="-950.517578125"/>
  </node>
  <node id="73593" label="1010000000" cy:nodeId="38993">
    <graphics z="0.0" y="270.33203125" x="-447.517578125"/>
  </node>
  <node id="73592" label="0101000000" cy:nodeId="38994">
    <graphics z="0.0" y="561.33203125" x="1063.482421875"/>
  </node>
  <node id="73591" label="0100000010" cy:nodeId="38995">
    <graphics z="0.0" y="867.33203125" x="1086.482421875"/>
  </node>
  <node id="73590" label="0100000000" cy:nodeId="38996">
    <graphics z="0.0" y="507.33203125" x="1260.482421875"/>
  </node>
  <node id="73589" label="1101000000" cy:nodeId="38997">
    <graphics z="0.0" y="544.33203125" x="-404.517578125"/>
  </node>
  <node id="73588" label="1100000010" cy:nodeId="38998">
    <graphics z="0.0" y="583.33203125" x="-521.517578125"/>
  </node>
  <node id="73587" label="1100000000" cy:nodeId="38999">
    <graphics z="0.0" y="407.33203125" x="-213.517578125"/>
  </node>
  <node id="73586" label="1001000000" cy:nodeId="39000">
    <graphics z="0.0" y="307.33203125" x="-673.517578125"/>
  </node>
  <node id="73585" label="1000000010" cy:nodeId="39001">
    <graphics z="0.0" y="275.33203125" x="-774.517578125"/>
  </node>
  <node id="73584" label="1000000000" cy:nodeId="39002">
    <graphics z="0.0" y="232.33203125" x="-440.517578125"/>
  </node>
  <node id="73583" label="0001000000" cy:nodeId="39003">
    <graphics z="0.0" y="507.33203125" x="809.482421875"/>
  </node>
  <node id="73582" label="0000000010" cy:nodeId="39004">
    <graphics z="0.0" y="930.33203125" x="841.482421875"/>
  </node>
  <node id="73581" label="0000000000" cy:nodeId="39005">
    <graphics z="0.0" y="415.33203125" x="1087.482421875"/>
  </node>
  <node id="74604" label="0111111111" cy:nodeId="37982">
    <graphics z="0.0" y="-23.66796875" x="-935.517578125"/>
  </node>
  <node id="74603" label="1111111111" cy:nodeId="37983">
    <graphics z="0.0" y="-63.66796875" x="541.482421875"/>
  </node>
  <node id="74602" label="0011111111" cy:nodeId="37984">
    <graphics z="0.0" y="-103.66796875" x="-1049.517578125"/>
  </node>
  <node id="74601" label="1011111111" cy:nodeId="37985">
    <graphics z="0.0" y="-195.66796875" x="458.482421875"/>
  </node>
  <node id="74600" label="0101111111" cy:nodeId="37986">
    <graphics z="0.0" y="-182.66796875" x="-1262.517578125"/>
  </node>
  <node id="74599" label="1101111111" cy:nodeId="37987">
    <graphics z="0.0" y="-182.66796875" x="264.482421875"/>
  </node>
  <node id="74598" label="0001111111" cy:nodeId="37988">
    <graphics z="0.0" y="-365.66796875" x="-1299.517578125"/>
  </node>
  <node id="74597" label="1001111111" cy:nodeId="37989">
    <graphics z="0.0" y="-380.66796875" x="127.482421875"/>
  </node>
  <node id="74596" label="0110111111" cy:nodeId="37990">
    <graphics z="0.0" y="-302.66796875" x="-1144.517578125"/>
  </node>
  <node id="74595" label="1110111111" cy:nodeId="37991">
    <graphics z="0.0" y="-77.66796875" x="377.482421875"/>
  </node>
  <node id="74594" label="0010111111" cy:nodeId="37992">
    <graphics z="0.0" y="-249.66796875" x="-1124.517578125"/>
  </node>
  <node id="74593" label="1010111111" cy:nodeId="37993">
    <graphics z="0.0" y="-359.66796875" x="336.482421875"/>
  </node>
  <node id="74592" label="0100111111" cy:nodeId="37994">
    <graphics z="0.0" y="-477.66796875" x="-1408.517578125"/>
  </node>
  <node id="74591" label="1100111111" cy:nodeId="37995">
    <graphics z="0.0" y="-282.66796875" x="130.482421875"/>
  </node>
  <node id="74590" label="0000111111" cy:nodeId="37996">
    <graphics z="0.0" y="-572.66796875" x="-1307.517578125"/>
  </node>
  <node id="74589" label="1000111111" cy:nodeId="37997">
    <graphics z="0.0" y="-551.66796875" x="60.482421875"/>
  </node>
  <node id="74588" label="0111111011" cy:nodeId="37998">
    <graphics z="0.0" y="-137.66796875" x="-643.517578125"/>
  </node>
  <node id="74587" label="0111101111" cy:nodeId="37999">
    <graphics z="0.0" y="-90.66796875" x="-716.517578125"/>
  </node>
  <node id="74586" label="1111111011" cy:nodeId="38000">
    <graphics z="0.0" y="-41.66796875" x="860.482421875"/>
  </node>
  <node id="74585" label="1111101111" cy:nodeId="38001">
    <graphics z="0.0" y="-113.66796875" x="815.482421875"/>
  </node>
  <node id="74584" label="1011111011" cy:nodeId="38002">
    <graphics z="0.0" y="-272.66796875" x="795.482421875"/>
  </node>
  <node id="74583" label="1011101111" cy:nodeId="38003">
    <graphics z="0.0" y="-322.66796875" x="724.482421875"/>
  </node>
  <node id="74582" label="0011111011" cy:nodeId="38004">
    <graphics z="0.0" y="-176.66796875" x="-700.517578125"/>
  </node>
  <node id="74581" label="0011101111" cy:nodeId="38005">
    <graphics z="0.0" y="-295.66796875" x="-810.517578125"/>
  </node>
  <node id="74580" label="0101111011" cy:nodeId="38006">
    <graphics z="0.0" y="-243.66796875" x="-968.517578125"/>
  </node>
  <node id="74579" label="0101101111" cy:nodeId="38007">
    <graphics z="0.0" y="-326.66796875" x="-1058.517578125"/>
  </node>
  <node id="74578" label="1101111011" cy:nodeId="38008">
    <graphics z="0.0" y="-189.66796875" x="578.482421875"/>
  </node>
  <node id="74577" label="1101101111" cy:nodeId="38009">
    <graphics z="0.0" y="-282.66796875" x="537.482421875"/>
  </node>
  <node id="74576" label="1011101011" cy:nodeId="38010">
    <graphics z="0.0" y="-439.66796875" x="1066.482421875"/>
  </node>
  <node id="74575" label="1001111011" cy:nodeId="38011">
    <graphics z="0.0" y="-318.66796875" x="495.482421875"/>
  </node>
  <node id="74574" label="1001101111" cy:nodeId="38012">
    <graphics z="0.0" y="-597.66796875" x="452.482421875"/>
  </node>
  <node id="74573" label="0011101011" cy:nodeId="38013">
    <graphics z="0.0" y="-464.66796875" x="-403.517578125"/>
  </node>
  <node id="74572" label="0001111011" cy:nodeId="38014">
    <graphics z="0.0" y="-513.66796875" x="-863.517578125"/>
  </node>
  <node id="74571" label="0001101111" cy:nodeId="38015">
    <graphics z="0.0" y="-686.66796875" x="-1153.517578125"/>
  </node>
  <node id="74570" label="1111011111" cy:nodeId="38016">
    <graphics z="0.0" y="-431.66796875" x="638.482421875"/>
  </node>
  <node id="74569" label="0111011111" cy:nodeId="38017">
    <graphics z="0.0" y="-259.66796875" x="-892.517578125"/>
  </node>
  <node id="74568" label="1011011111" cy:nodeId="38018">
    <graphics z="0.0" y="-537.66796875" x="367.482421875"/>
  </node>
  <node id="74567" label="0011011111" cy:nodeId="38019">
    <graphics z="0.0" y="-472.66796875" x="-953.517578125"/>
  </node>
  <node id="74566" label="0110111011" cy:nodeId="38020">
    <graphics z="0.0" y="-467.66796875" x="-787.517578125"/>
  </node>
  <node id="74565" label="0110101111" cy:nodeId="38021">
    <graphics z="0.0" y="-364.66796875" x="-903.517578125"/>
  </node>
  <node id="74564" label="0110101011" cy:nodeId="38022">
    <graphics z="0.0" y="-565.66796875" x="-634.517578125"/>
  </node>
  <node id="74563" label="1110111011" cy:nodeId="38023">
    <graphics z="0.0" y="-179.66796875" x="692.482421875"/>
  </node>
  <node id="74562" label="1110101111" cy:nodeId="38024">
    <graphics z="0.0" y="-215.66796875" x="659.482421875"/>
  </node>
  <node id="74561" label="1110101011" cy:nodeId="38025">
    <graphics z="0.0" y="-297.66796875" x="1034.482421875"/>
  </node>
  <node id="74560" label="1010111011" cy:nodeId="38026">
    <graphics z="0.0" y="-503.66796875" x="717.482421875"/>
  </node>
  <node id="74559" label="1010101111" cy:nodeId="38027">
    <graphics z="0.0" y="-629.66796875" x="664.482421875"/>
  </node>
  <node id="74558" label="0010111011" cy:nodeId="38028">
    <graphics z="0.0" y="-308.66796875" x="-698.517578125"/>
  </node>
  <node id="74557" label="0010101111" cy:nodeId="38029">
    <graphics z="0.0" y="-549.66796875" x="-830.517578125"/>
  </node>
  <node id="74556" label="0101011111" cy:nodeId="38030">
    <graphics z="0.0" y="-525.66796875" x="-1285.517578125"/>
  </node>
  <node id="74555" label="1101011111" cy:nodeId="38031">
    <graphics z="0.0" y="-514.66796875" x="130.482421875"/>
  </node>
  <node id="74554" label="0111110111" cy:nodeId="38032">
    <graphics z="0.0" y="-221.66796875" x="-682.517578125"/>
  </node>
  <node id="74553" label="1111110111" cy:nodeId="38033">
    <graphics z="0.0" y="-74.66796875" x="670.482421875"/>
  </node>
  <node id="74552" label="1001011111" cy:nodeId="38034">
    <graphics z="0.0" y="-870.66796875" x="157.482421875"/>
  </node>
  <node id="74551" label="0001011111" cy:nodeId="38035">
    <graphics z="0.0" y="-756.66796875" x="-1353.517578125"/>
  </node>
  <node id="74550" label="0011110111" cy:nodeId="38036">
    <graphics z="0.0" y="-246.66796875" x="-806.517578125"/>
  </node>
  <node id="74549" label="1011110111" cy:nodeId="38037">
    <graphics z="0.0" y="-296.66796875" x="613.482421875"/>
  </node>
  <node id="74548" label="0100111011" cy:nodeId="38038">
    <graphics z="0.0" y="-758.66796875" x="-1125.517578125"/>
  </node>
  <node id="74547" label="0100101111" cy:nodeId="38039">
    <graphics z="0.0" y="-720.66796875" x="-1290.517578125"/>
  </node>
  <node id="74546" label="0100101011" cy:nodeId="38040">
    <graphics z="0.0" y="-836.66796875" x="-903.517578125"/>
  </node>
  <node id="74545" label="1100111011" cy:nodeId="38041">
    <graphics z="0.0" y="-331.66796875" x="412.482421875"/>
  </node>
  <node id="74544" label="1100101111" cy:nodeId="38042">
    <graphics z="0.0" y="-573.66796875" x="354.482421875"/>
  </node>
  <node id="74543" label="1100101011" cy:nodeId="38043">
    <graphics z="0.0" y="-395.66796875" x="610.482421875"/>
  </node>
  <node id="74542" label="1010101011" cy:nodeId="38044">
    <graphics z="0.0" y="-511.66796875" x="1063.482421875"/>
  </node>
  <node id="74541" label="1001101011" cy:nodeId="38045">
    <graphics z="0.0" y="-691.66796875" x="926.482421875"/>
  </node>
  <node id="74540" label="1000111011" cy:nodeId="38046">
    <graphics z="0.0" y="-686.66796875" x="303.482421875"/>
  </node>
  <node id="74539" label="1000101111" cy:nodeId="38047">
    <graphics z="0.0" y="-733.66796875" x="217.482421875"/>
  </node>
  <node id="74538" label="1000101011" cy:nodeId="38048">
    <graphics z="0.0" y="-774.66796875" x="695.482421875"/>
  </node>
  <node id="74537" label="0010101011" cy:nodeId="38049">
    <graphics z="0.0" y="-699.66796875" x="-461.517578125"/>
  </node>
  <node id="74536" label="0001101011" cy:nodeId="38050">
    <graphics z="0.0" y="-765.66796875" x="-679.517578125"/>
  </node>
  <node id="74535" label="0000111011" cy:nodeId="38051">
    <graphics z="0.0" y="-868.66796875" x="-1029.517578125"/>
  </node>
  <node id="74534" label="0000101111" cy:nodeId="38052">
    <graphics z="0.0" y="-788.66796875" x="-1241.517578125"/>
  </node>
  <node id="74533" label="0000101011" cy:nodeId="38053">
    <graphics z="0.0" y="-850.66796875" x="-743.517578125"/>
  </node>
  <node id="74532" label="0110011111" cy:nodeId="38054">
    <graphics z="0.0" y="-500.66796875" x="-1173.517578125"/>
  </node>
  <node id="74531" label="0101110111" cy:nodeId="38055">
    <graphics z="0.0" y="-463.66796875" x="-1172.517578125"/>
  </node>
  <node id="74530" label="1101110111" cy:nodeId="38056">
    <graphics z="0.0" y="-218.66796875" x="304.482421875"/>
  </node>
  <node id="74529" label="1110011111" cy:nodeId="38057">
    <graphics z="0.0" y="-429.66796875" x="270.482421875"/>
  </node>
  <node id="74528" label="1111101011" cy:nodeId="38058">
    <graphics z="0.0" y="-179.66796875" x="1120.482421875"/>
  </node>
  <node id="74527" label="1001110111" cy:nodeId="38059">
    <graphics z="0.0" y="-624.66796875" x="229.482421875"/>
  </node>
  <node id="74526" label="0111101011" cy:nodeId="38060">
    <graphics z="0.0" y="-272.66796875" x="-556.517578125"/>
  </node>
  <node id="74525" label="0001110111" cy:nodeId="38061">
    <graphics z="0.0" y="-612.66796875" x="-1183.517578125"/>
  </node>
  <node id="74524" label="1010011111" cy:nodeId="38062">
    <graphics z="0.0" y="-588.66796875" x="239.482421875"/>
  </node>
  <node id="74523" label="0010011111" cy:nodeId="38063">
    <graphics z="0.0" y="-648.66796875" x="-1212.517578125"/>
  </node>
  <node id="74522" label="0100011111" cy:nodeId="38064">
    <graphics z="0.0" y="-772.66796875" x="-1434.517578125"/>
  </node>
  <node id="74521" label="1100011111" cy:nodeId="38065">
    <graphics z="0.0" y="-632.66796875" x="-9.517578125"/>
  </node>
  <node id="74520" label="0110110111" cy:nodeId="38066">
    <graphics z="0.0" y="-436.66796875" x="-924.517578125"/>
  </node>
  <node id="74519" label="0101101011" cy:nodeId="38067">
    <graphics z="0.0" y="-583.66796875" x="-754.517578125"/>
  </node>
  <node id="74518" label="1110110111" cy:nodeId="38068">
    <graphics z="0.0" y="-231.66796875" x="443.482421875"/>
  </node>
  <node id="74517" label="1101101011" cy:nodeId="38069">
    <graphics z="0.0" y="-351.66796875" x="887.482421875"/>
  </node>
  <node id="74516" label="1000011111" cy:nodeId="38070">
    <graphics z="0.0" y="-845.66796875" x="-3.517578125"/>
  </node>
  <node id="74515" label="0000011111" cy:nodeId="38071">
    <graphics z="0.0" y="-915.66796875" x="-1415.517578125"/>
  </node>
  <node id="74514" label="0010110111" cy:nodeId="38072">
    <graphics z="0.0" y="-540.66796875" x="-1076.517578125"/>
  </node>
  <node id="74513" label="1010110111" cy:nodeId="38073">
    <graphics z="0.0" y="-465.66796875" x="302.482421875"/>
  </node>
  <node id="74512" label="0100110111" cy:nodeId="38074">
    <graphics z="0.0" y="-824.66796875" x="-1238.517578125"/>
  </node>
  <node id="74511" label="1100110111" cy:nodeId="38075">
    <graphics z="0.0" y="-416.66796875" x="130.482421875"/>
  </node>
  <node id="74510" label="0000110111" cy:nodeId="38076">
    <graphics z="0.0" y="-899.66796875" x="-1339.517578125"/>
  </node>
  <node id="74509" label="1000110111" cy:nodeId="38077">
    <graphics z="0.0" y="-786.66796875" x="130.482421875"/>
  </node>
  <node id="74508" label="0111001111" cy:nodeId="38078">
    <graphics z="0.0" y="-344.66796875" x="-695.517578125"/>
  </node>
  <node id="74507" label="1111001111" cy:nodeId="38079">
    <graphics z="0.0" y="-387.66796875" x="824.482421875"/>
  </node>
  <node id="74506" label="1011001111" cy:nodeId="38080">
    <graphics z="0.0" y="-784.66796875" x="564.482421875"/>
  </node>
  <node id="74505" label="0011001111" cy:nodeId="38081">
    <graphics z="0.0" y="-331.66796875" x="-792.517578125"/>
  </node>
  <node id="74504" label="0101001111" cy:nodeId="38082">
    <graphics z="0.0" y="-650.66796875" x="-1057.517578125"/>
  </node>
  <node id="74503" label="1101001111" cy:nodeId="38083">
    <graphics z="0.0" y="-525.66796875" x="492.482421875"/>
  </node>
  <node id="74502" label="1111110011" cy:nodeId="38084">
    <graphics z="0.0" y="-178.66796875" x="997.482421875"/>
  </node>
  <node id="74501" label="1111100111" cy:nodeId="38085">
    <graphics z="0.0" y="-190.66796875" x="819.482421875"/>
  </node>
  <node id="74500" label="1001001111" cy:nodeId="38086">
    <graphics z="0.0" y="-993.66796875" x="499.482421875"/>
  </node>
  <node id="74499" label="0001001111" cy:nodeId="38087">
    <graphics z="0.0" y="-722.66796875" x="-1134.517578125"/>
  </node>
  <node id="74498" label="0111110011" cy:nodeId="38088">
    <graphics z="0.0" y="-368.66796875" x="-324.517578125"/>
  </node>
  <node id="74497" label="0111100111" cy:nodeId="38089">
    <graphics z="0.0" y="-428.66796875" x="-446.517578125"/>
  </node>
  <node id="74496" label="1011110011" cy:nodeId="38090">
    <graphics z="0.0" y="-363.66796875" x="993.482421875"/>
  </node>
  <node id="74495" label="1011100111" cy:nodeId="38091">
    <graphics z="0.0" y="-509.66796875" x="923.482421875"/>
  </node>
  <node id="74494" label="0011110011" cy:nodeId="38092">
    <graphics z="0.0" y="-522.66796875" x="-391.517578125"/>
  </node>
  <node id="74493" label="0011100111" cy:nodeId="38093">
    <graphics z="0.0" y="-651.66796875" x="-563.517578125"/>
  </node>
  <node id="74492" label="1011101110" cy:nodeId="38094">
    <graphics z="0.0" y="1249.33203125" x="-1247.517578125"/>
  </node>
  <node id="74491" label="0011101110" cy:nodeId="38095">
    <graphics z="0.0" y="1287.33203125" x="420.482421875"/>
  </node>
  <node id="74490" label="0111111101" cy:nodeId="38096">
    <graphics z="0.0" y="-36.66796875" x="-801.517578125"/>
  </node>
  <node id="74489" label="1111111101" cy:nodeId="38097">
    <graphics z="0.0" y="-225.66796875" x="545.482421875"/>
  </node>
  <node id="74488" label="0110001111" cy:nodeId="38098">
    <graphics z="0.0" y="-544.66796875" x="-974.517578125"/>
  </node>
  <node id="74487" label="0011111101" cy:nodeId="38099">
    <graphics z="0.0" y="-110.66796875" x="-875.517578125"/>
  </node>
  <node id="74486" label="0101110011" cy:nodeId="38100">
    <graphics z="0.0" y="-693.66796875" x="-698.517578125"/>
  </node>
  <node id="74485" label="0101100111" cy:nodeId="38101">
    <graphics z="0.0" y="-688.66796875" x="-924.517578125"/>
  </node>
  <node id="74484" label="1011111101" cy:nodeId="38102">
    <graphics z="0.0" y="-415.66796875" x="382.482421875"/>
  </node>
  <node id="74483" label="1101110011" cy:nodeId="38103">
    <graphics z="0.0" y="-286.66796875" x="714.482421875"/>
  </node>
  <node id="74482" label="1101100111" cy:nodeId="38104">
    <graphics z="0.0" y="-354.66796875" x="488.482421875"/>
  </node>
  <node id="74481" label="1110001111" cy:nodeId="38105">
    <graphics z="0.0" y="-593.66796875" x="629.482421875"/>
  </node>
  <node id="74480" label="1011100011" cy:nodeId="38106">
    <graphics z="0.0" y="-574.66796875" x="1188.482421875"/>
  </node>
  <node id="74479" label="1001110011" cy:nodeId="38107">
    <graphics z="0.0" y="-414.66796875" x="534.482421875"/>
  </node>
  <node id="74478" label="1001100111" cy:nodeId="38108">
    <graphics z="0.0" y="-705.66796875" x="451.482421875"/>
  </node>
  <node id="74477" label="0011100011" cy:nodeId="38109">
    <graphics z="0.0" y="-804.66796875" x="-239.517578125"/>
  </node>
  <node id="74476" label="0001110011" cy:nodeId="38110">
    <graphics z="0.0" y="-872.66796875" x="-888.517578125"/>
  </node>
  <node id="74475" label="0001100111" cy:nodeId="38111">
    <graphics z="0.0" y="-980.66796875" x="-930.517578125"/>
  </node>
  <node id="74474" label="1010001111" cy:nodeId="38112">
    <graphics z="0.0" y="-1029.66796875" x="525.482421875"/>
  </node>
  <node id="74473" label="0010001111" cy:nodeId="38113">
    <graphics z="0.0" y="-908.66796875" x="-895.517578125"/>
  </node>
  <node id="74472" label="0110101110" cy:nodeId="38114">
    <graphics z="0.0" y="1330.33203125" x="868.482421875"/>
  </node>
  <node id="74471" label="1111010111" cy:nodeId="38115">
    <graphics z="0.0" y="-503.66796875" x="582.482421875"/>
  </node>
  <node id="74470" label="0111010111" cy:nodeId="38116">
    <graphics z="0.0" y="-619.66796875" x="-697.517578125"/>
  </node>
  <node id="74469" label="1110101110" cy:nodeId="38117">
    <graphics z="0.0" y="1421.33203125" x="-757.517578125"/>
  </node>
  <node id="74468" label="0011010111" cy:nodeId="38118">
    <graphics z="0.0" y="-652.66796875" x="-905.517578125"/>
  </node>
  <node id="74467" label="0101111101" cy:nodeId="38119">
    <graphics z="0.0" y="-125.66796875" x="-1153.517578125"/>
  </node>
  <node id="74466" label="1011010111" cy:nodeId="38120">
    <graphics z="0.0" y="-813.66796875" x="448.482421875"/>
  </node>
  <node id="74465" label="1101111101" cy:nodeId="38121">
    <graphics z="0.0" y="-393.66796875" x="239.482421875"/>
  </node>
  <node id="74464" label="0001111101" cy:nodeId="38122">
    <graphics z="0.0" y="-318.66796875" x="-1225.517578125"/>
  </node>
  <node id="74463" label="0100001111" cy:nodeId="38123">
    <graphics z="0.0" y="-969.66796875" x="-1251.517578125"/>
  </node>
  <node id="74462" label="1001111101" cy:nodeId="38124">
    <graphics z="0.0" y="-708.66796875" x="99.482421875"/>
  </node>
  <node id="74461" label="1100001111" cy:nodeId="38125">
    <graphics z="0.0" y="-830.66796875" x="283.482421875"/>
  </node>
  <node id="74460" label="0110110011" cy:nodeId="38126">
    <graphics z="0.0" y="-663.66796875" x="-455.517578125"/>
  </node>
  <node id="74459" label="0110100111" cy:nodeId="38127">
    <graphics z="0.0" y="-615.66796875" x="-593.517578125"/>
  </node>
  <node id="74458" label="0110100011" cy:nodeId="38128">
    <graphics z="0.0" y="-905.66796875" x="-284.517578125"/>
  </node>
  <node id="74457" label="1110110011" cy:nodeId="38129">
    <graphics z="0.0" y="-225.66796875" x="916.482421875"/>
  </node>
  <node id="74456" label="1110100111" cy:nodeId="38130">
    <graphics z="0.0" y="-394.66796875" x="686.482421875"/>
  </node>
  <node id="74455" label="1000001111" cy:nodeId="38131">
    <graphics z="0.0" y="-1134.66796875" x="271.482421875"/>
  </node>
  <node id="74454" label="0000001111" cy:nodeId="38132">
    <graphics z="0.0" y="-1181.66796875" x="-1194.517578125"/>
  </node>
  <node id="74453" label="0100101110" cy:nodeId="38133">
    <graphics z="0.0" y="1386.33203125" x="1079.482421875"/>
  </node>
  <node id="74452" label="1110100011" cy:nodeId="38134">
    <graphics z="0.0" y="-475.66796875" x="1091.482421875"/>
  </node>
  <node id="74451" label="1010110011" cy:nodeId="38135">
    <graphics z="0.0" y="-477.66796875" x="793.482421875"/>
  </node>
  <node id="74450" label="1010100111" cy:nodeId="38136">
    <graphics z="0.0" y="-719.66796875" x="683.482421875"/>
  </node>
  <node id="74449" label="0101010111" cy:nodeId="38137">
    <graphics z="0.0" y="-802.66796875" x="-1145.517578125"/>
  </node>
  <node id="74448" label="0010110011" cy:nodeId="38138">
    <graphics z="0.0" y="-786.66796875" x="-569.517578125"/>
  </node>
  <node id="74447" label="0010100111" cy:nodeId="38139">
    <graphics z="0.0" y="-952.66796875" x="-552.517578125"/>
  </node>
  <node id="74446" label="1101010111" cy:nodeId="38140">
    <graphics z="0.0" y="-552.66796875" x="245.482421875"/>
  </node>
  <node id="74445" label="1100101110" cy:nodeId="38141">
    <graphics z="0.0" y="1360.33203125" x="-521.517578125"/>
  </node>
  <node id="74444" label="1010101110" cy:nodeId="38142">
    <graphics z="0.0" y="1206.33203125" x="-979.517578125"/>
  </node>
  <node id="74443" label="1001101110" cy:nodeId="38143">
    <graphics z="0.0" y="1260.33203125" x="-1008.517578125"/>
  </node>
  <node id="74442" label="1000101110" cy:nodeId="38144">
    <graphics z="0.0" y="1238.33203125" x="-690.517578125"/>
  </node>
  <node id="74441" label="0010101110" cy:nodeId="38145">
    <graphics z="0.0" y="1359.33203125" x="661.482421875"/>
  </node>
  <node id="74440" label="0001101110" cy:nodeId="38146">
    <graphics z="0.0" y="1395.33203125" x="663.482421875"/>
  </node>
  <node id="74439" label="0000101110" cy:nodeId="38147">
    <graphics z="0.0" y="1400.33203125" x="899.482421875"/>
  </node>
  <node id="74438" label="0001010111" cy:nodeId="38148">
    <graphics z="0.0" y="-940.66796875" x="-1149.517578125"/>
  </node>
  <node id="74437" label="1001010111" cy:nodeId="38149">
    <graphics z="0.0" y="-927.66796875" x="217.482421875"/>
  </node>
  <node id="74436" label="0110111101" cy:nodeId="38150">
    <graphics z="0.0" y="-150.66796875" x="-997.517578125"/>
  </node>
  <node id="74435" label="1110111101" cy:nodeId="38151">
    <graphics z="0.0" y="-323.66796875" x="327.482421875"/>
  </node>
  <node id="74434" label="0111101110" cy:nodeId="38152">
    <graphics z="0.0" y="1258.33203125" x="635.482421875"/>
  </node>
  <node id="74433" label="1111101110" cy:nodeId="38153">
    <graphics z="0.0" y="1403.33203125" x="-1068.517578125"/>
  </node>
  <node id="74432" label="0100110011" cy:nodeId="38154">
    <graphics z="0.0" y="-1016.66796875" x="-876.517578125"/>
  </node>
  <node id="74431" label="0100100111" cy:nodeId="38155">
    <graphics z="0.0" y="-1045.66796875" x="-1041.517578125"/>
  </node>
  <node id="74430" label="0100100011" cy:nodeId="38156">
    <graphics z="0.0" y="-1139.66796875" x="-655.517578125"/>
  </node>
  <node id="74429" label="0010111101" cy:nodeId="38157">
    <graphics z="0.0" y="-398.66796875" x="-1040.517578125"/>
  </node>
  <node id="74428" label="1100110011" cy:nodeId="38158">
    <graphics z="0.0" y="-408.66796875" x="458.482421875"/>
  </node>
  <node id="74427" label="1100100111" cy:nodeId="38159">
    <graphics z="0.0" y="-501.66796875" x="338.482421875"/>
  </node>
  <node id="74426" label="1010111101" cy:nodeId="38160">
    <graphics z="0.0" y="-697.66796875" x="178.482421875"/>
  </node>
  <node id="74425" label="1100100011" cy:nodeId="38161">
    <graphics z="0.0" y="-611.66796875" x="752.482421875"/>
  </node>
  <node id="74424" label="1010100011" cy:nodeId="38162">
    <graphics z="0.0" y="-760.66796875" x="1028.482421875"/>
  </node>
  <node id="74423" label="1001100011" cy:nodeId="38163">
    <graphics z="0.0" y="-763.66796875" x="907.482421875"/>
  </node>
  <node id="74422" label="1000110011" cy:nodeId="38164">
    <graphics z="0.0" y="-924.66796875" x="500.482421875"/>
  </node>
  <node id="74421" label="1000100111" cy:nodeId="38165">
    <graphics z="0.0" y="-1065.66796875" x="544.482421875"/>
  </node>
  <node id="74420" label="1000100011" cy:nodeId="38166">
    <graphics z="0.0" y="-1078.66796875" x="758.482421875"/>
  </node>
  <node id="74419" label="0010100011" cy:nodeId="38167">
    <graphics z="0.0" y="-977.66796875" x="-404.517578125"/>
  </node>
  <node id="74418" label="0001100011" cy:nodeId="38168">
    <graphics z="0.0" y="-1191.66796875" x="-452.517578125"/>
  </node>
  <node id="74417" label="0000110011" cy:nodeId="38169">
    <graphics z="0.0" y="-1117.66796875" x="-993.517578125"/>
  </node>
  <node id="74416" label="0000100111" cy:nodeId="38170">
    <graphics z="0.0" y="-1189.66796875" x="-970.517578125"/>
  </node>
  <node id="74415" label="0000100011" cy:nodeId="38171">
    <graphics z="0.0" y="-1260.66796875" x="-668.517578125"/>
  </node>
  <node id="74414" label="0110010111" cy:nodeId="38172">
    <graphics z="0.0" y="-937.66796875" x="-1010.517578125"/>
  </node>
  <node id="74413" label="1110010111" cy:nodeId="38173">
    <graphics z="0.0" y="-650.66796875" x="325.482421875"/>
  </node>
  <node id="74412" label="1100111101" cy:nodeId="38174">
    <graphics z="0.0" y="-550.66796875" x="136.482421875"/>
  </node>
  <node id="74411" label="0111100011" cy:nodeId="38175">
    <graphics z="0.0" y="-632.66796875" x="-259.517578125"/>
  </node>
  <node id="74410" label="1111100011" cy:nodeId="38176">
    <graphics z="0.0" y="-324.66796875" x="1170.482421875"/>
  </node>
  <node id="74409" label="1010010111" cy:nodeId="38177">
    <graphics z="0.0" y="-866.66796875" x="299.482421875"/>
  </node>
  <node id="74408" label="0100111101" cy:nodeId="38178">
    <graphics z="0.0" y="-474.66796875" x="-1309.517578125"/>
  </node>
  <node id="74407" label="0010010111" cy:nodeId="38179">
    <graphics z="0.0" y="-1102.66796875" x="-1119.517578125"/>
  </node>
  <node id="74406" label="0101101110" cy:nodeId="38180">
    <graphics z="0.0" y="1409.33203125" x="823.482421875"/>
  </node>
  <node id="74405" label="1101101110" cy:nodeId="38181">
    <graphics z="0.0" y="1385.33203125" x="-814.517578125"/>
  </node>
  <node id="74404" label="0000111101" cy:nodeId="38182">
    <graphics z="0.0" y="-636.66796875" x="-1378.517578125"/>
  </node>
  <node id="74403" label="1000111101" cy:nodeId="38183">
    <graphics z="0.0" y="-828.66796875" x="75.482421875"/>
  </node>
  <node id="74402" label="1111011101" cy:nodeId="38184">
    <graphics z="0.0" y="-561.66796875" x="454.482421875"/>
  </node>
  <node id="74401" label="1111011011" cy:nodeId="38185">
    <graphics z="0.0" y="-236.66796875" x="777.482421875"/>
  </node>
  <node id="74400" label="0111011101" cy:nodeId="38186">
    <graphics z="0.0" y="-380.66796875" x="-745.517578125"/>
  </node>
  <node id="74399" label="0111011011" cy:nodeId="38187">
    <graphics z="0.0" y="-313.66796875" x="-511.517578125"/>
  </node>
  <node id="74398" label="0100010111" cy:nodeId="38188">
    <graphics z="0.0" y="-1110.66796875" x="-1272.517578125"/>
  </node>
  <node id="74397" label="1100010111" cy:nodeId="38189">
    <graphics z="0.0" y="-790.66796875" x="-2.517578125"/>
  </node>
  <node id="74396" label="1000010111" cy:nodeId="38190">
    <graphics z="0.0" y="-1111.66796875" x="100.482421875"/>
  </node>
  <node id="74395" label="1011011101" cy:nodeId="38191">
    <graphics z="0.0" y="-633.66796875" x="401.482421875"/>
  </node>
  <node id="74394" label="1011011011" cy:nodeId="38192">
    <graphics z="0.0" y="-655.66796875" x="972.482421875"/>
  </node>
  <node id="74393" label="0011011101" cy:nodeId="38193">
    <graphics z="0.0" y="-284.66796875" x="-995.517578125"/>
  </node>
  <node id="74392" label="0011011011" cy:nodeId="38194">
    <graphics z="0.0" y="-403.66796875" x="-570.517578125"/>
  </node>
  <node id="74391" label="0111111110" cy:nodeId="38195">
    <graphics z="0.0" y="958.33203125" x="637.482421875"/>
  </node>
  <node id="74390" label="0000010111" cy:nodeId="38196">
    <graphics z="0.0" y="-1240.66796875" x="-1310.517578125"/>
  </node>
  <node id="74389" label="0101100011" cy:nodeId="38197">
    <graphics z="0.0" y="-916.66796875" x="-580.517578125"/>
  </node>
  <node id="74388" label="1111111110" cy:nodeId="38198">
    <graphics z="0.0" y="1243.33203125" x="-1084.517578125"/>
  </node>
  <node id="74387" label="1101100011" cy:nodeId="38199">
    <graphics z="0.0" y="-399.66796875" x="971.482421875"/>
  </node>
  <node id="74386" label="0011111110" cy:nodeId="38200">
    <graphics z="0.0" y="1003.33203125" x="352.482421875"/>
  </node>
  <node id="74385" label="1011111110" cy:nodeId="38201">
    <graphics z="0.0" y="1023.33203125" x="-1307.517578125"/>
  </node>
  <node id="74384" label="0101011101" cy:nodeId="38202">
    <graphics z="0.0" y="-427.66796875" x="-1171.517578125"/>
  </node>
  <node id="74383" label="0101011011" cy:nodeId="38203">
    <graphics z="0.0" y="-692.66796875" x="-818.517578125"/>
  </node>
  <node id="74382" label="1101011101" cy:nodeId="38204">
    <graphics z="0.0" y="-794.66796875" x="296.482421875"/>
  </node>
  <node id="74381" label="1101011011" cy:nodeId="38205">
    <graphics z="0.0" y="-651.66796875" x="525.482421875"/>
  </node>
  <node id="74380" label="0001011101" cy:nodeId="38206">
    <graphics z="0.0" y="-684.66796875" x="-1234.517578125"/>
  </node>
  <node id="74379" label="0001011011" cy:nodeId="38207">
    <graphics z="0.0" y="-760.66796875" x="-980.517578125"/>
  </node>
  <node id="74378" label="1001011101" cy:nodeId="38208">
    <graphics z="0.0" y="-1019.66796875" x="134.482421875"/>
  </node>
  <node id="74377" label="1001011011" cy:nodeId="38209">
    <graphics z="0.0" y="-1083.66796875" x="395.482421875"/>
  </node>
  <node id="74376" label="0101111110" cy:nodeId="38210">
    <graphics z="0.0" y="1227.33203125" x="888.482421875"/>
  </node>
  <node id="74375" label="1101111110" cy:nodeId="38211">
    <graphics z="0.0" y="1194.33203125" x="-842.517578125"/>
  </node>
  <node id="74374" label="0001111110" cy:nodeId="38212">
    <graphics z="0.0" y="1192.33203125" x="622.482421875"/>
  </node>
  <node id="74373" label="1001111110" cy:nodeId="38213">
    <graphics z="0.0" y="1134.33203125" x="-1077.517578125"/>
  </node>
  <node id="74372" label="0111101101" cy:nodeId="38214">
    <graphics z="0.0" y="-83.66796875" x="-606.517578125"/>
  </node>
  <node id="74371" label="0110011101" cy:nodeId="38215">
    <graphics z="0.0" y="-508.66796875" x="-988.517578125"/>
  </node>
  <node id="74370" label="0110011011" cy:nodeId="38216">
    <graphics z="0.0" y="-464.66796875" x="-707.517578125"/>
  </node>
  <node id="74369" label="1111101101" cy:nodeId="38217">
    <graphics z="0.0" y="-315.66796875" x="865.482421875"/>
  </node>
  <node id="74368" label="1110011101" cy:nodeId="38218">
    <graphics z="0.0" y="-669.66796875" x="438.482421875"/>
  </node>
  <node id="74367" label="1110011011" cy:nodeId="38219">
    <graphics z="0.0" y="-539.66796875" x="761.482421875"/>
  </node>
  <node id="74366" label="1011101101" cy:nodeId="38220">
    <graphics z="0.0" y="-653.66796875" x="836.482421875"/>
  </node>
  <node id="74365" label="0011101101" cy:nodeId="38221">
    <graphics z="0.0" y="-257.66796875" x="-659.517578125"/>
  </node>
  <node id="74364" label="1010011101" cy:nodeId="38222">
    <graphics z="0.0" y="-968.66796875" x="345.482421875"/>
  </node>
  <node id="74363" label="1010011011" cy:nodeId="38223">
    <graphics z="0.0" y="-964.66796875" x="613.482421875"/>
  </node>
  <node id="74362" label="0110111110" cy:nodeId="38224">
    <graphics z="0.0" y="1094.33203125" x="820.482421875"/>
  </node>
  <node id="74361" label="1110111110" cy:nodeId="38225">
    <graphics z="0.0" y="1236.33203125" x="-588.517578125"/>
  </node>
  <node id="74360" label="0010011101" cy:nodeId="38226">
    <graphics z="0.0" y="-686.66796875" x="-1077.517578125"/>
  </node>
  <node id="74359" label="0010011011" cy:nodeId="38227">
    <graphics z="0.0" y="-814.66796875" x="-761.517578125"/>
  </node>
  <node id="74358" label="0010111110" cy:nodeId="38228">
    <graphics z="0.0" y="995.33203125" x="580.482421875"/>
  </node>
  <node id="74357" label="1010111110" cy:nodeId="38229">
    <graphics z="0.0" y="1008.33203125" x="-946.517578125"/>
  </node>
  <node id="74356" label="0111000111" cy:nodeId="38230">
    <graphics z="0.0" y="-475.66796875" x="-631.517578125"/>
  </node>
  <node id="74355" label="1111000111" cy:nodeId="38231">
    <graphics z="0.0" y="-471.66796875" x="896.482421875"/>
  </node>
  <node id="74354" label="0101101101" cy:nodeId="38232">
    <graphics z="0.0" y="-186.66796875" x="-971.517578125"/>
  </node>
  <node id="74353" label="1100011101" cy:nodeId="38233">
    <graphics z="0.0" y="-928.66796875" x="62.482421875"/>
  </node>
  <node id="74352" label="1100011011" cy:nodeId="38234">
    <graphics z="0.0" y="-758.66796875" x="317.482421875"/>
  </node>
  <node id="74351" label="0100011101" cy:nodeId="38235">
    <graphics z="0.0" y="-862.66796875" x="-1254.517578125"/>
  </node>
  <node id="74350" label="0100011011" cy:nodeId="38236">
    <graphics z="0.0" y="-904.66796875" x="-1096.517578125"/>
  </node>
  <node id="74349" label="1101101101" cy:nodeId="38237">
    <graphics z="0.0" y="-552.66796875" x="589.482421875"/>
  </node>
  <node id="74348" label="1011000111" cy:nodeId="38238">
    <graphics z="0.0" y="-1006.66796875" x="787.482421875"/>
  </node>
  <node id="74347" label="0011000111" cy:nodeId="38239">
    <graphics z="0.0" y="-903.66796875" x="-504.517578125"/>
  </node>
  <node id="74346" label="1111110110" cy:nodeId="38240">
    <graphics z="0.0" y="888.33203125" x="-1140.517578125"/>
  </node>
  <node id="74345" label="0111110110" cy:nodeId="38241">
    <graphics z="0.0" y="738.33203125" x="416.482421875"/>
  </node>
  <node id="74344" label="0011101001" cy:nodeId="38242">
    <graphics z="0.0" y="-404.66796875" x="-288.517578125"/>
  </node>
  <node id="74343" label="0001101101" cy:nodeId="38243">
    <graphics z="0.0" y="-362.66796875" x="-1037.517578125"/>
  </node>
  <node id="74342" label="1011101001" cy:nodeId="38244">
    <graphics z="0.0" y="-696.66796875" x="1115.482421875"/>
  </node>
  <node id="74341" label="1001101101" cy:nodeId="38245">
    <graphics z="0.0" y="-957.66796875" x="424.482421875"/>
  </node>
  <node id="74340" label="0000011101" cy:nodeId="38246">
    <graphics z="0.0" y="-965.66796875" x="-1388.517578125"/>
  </node>
  <node id="74339" label="0000011011" cy:nodeId="38247">
    <graphics z="0.0" y="-1066.66796875" x="-1125.517578125"/>
  </node>
  <node id="74338" label="1000011101" cy:nodeId="38248">
    <graphics z="0.0" y="-1147.66796875" x="127.482421875"/>
  </node>
  <node id="74337" label="1000011011" cy:nodeId="38249">
    <graphics z="0.0" y="-885.66796875" x="419.482421875"/>
  </node>
  <node id="74336" label="0011110110" cy:nodeId="38250">
    <graphics z="0.0" y="688.33203125" x="266.482421875"/>
  </node>
  <node id="74335" label="1100111110" cy:nodeId="38251">
    <graphics z="0.0" y="1160.33203125" x="-450.517578125"/>
  </node>
  <node id="74334" label="1011110110" cy:nodeId="38252">
    <graphics z="0.0" y="708.33203125" x="-1434.517578125"/>
  </node>
  <node id="74333" label="0100111110" cy:nodeId="38253">
    <graphics z="0.0" y="1128.33203125" x="1171.482421875"/>
  </node>
  <node id="74332" label="0000111110" cy:nodeId="38254">
    <graphics z="0.0" y="1047.33203125" x="920.482421875"/>
  </node>
  <node id="74331" label="1000111110" cy:nodeId="38255">
    <graphics z="0.0" y="923.33203125" x="-578.517578125"/>
  </node>
  <node id="74330" label="0101000111" cy:nodeId="38256">
    <graphics z="0.0" y="-1052.66796875" x="-917.517578125"/>
  </node>
  <node id="74329" label="1101000111" cy:nodeId="38257">
    <graphics z="0.0" y="-856.66796875" x="535.482421875"/>
  </node>
  <node id="74328" label="1001000111" cy:nodeId="38258">
    <graphics z="0.0" y="-1222.66796875" x="415.482421875"/>
  </node>
  <node id="74327" label="0001000111" cy:nodeId="38259">
    <graphics z="0.0" y="-1236.66796875" x="-908.517578125"/>
  </node>
  <node id="74326" label="0101110110" cy:nodeId="38260">
    <graphics z="0.0" y="850.33203125" x="599.482421875"/>
  </node>
  <node id="74325" label="1101110110" cy:nodeId="38261">
    <graphics z="0.0" y="895.33203125" x="-1004.517578125"/>
  </node>
  <node id="74324" label="0110101101" cy:nodeId="38262">
    <graphics z="0.0" y="-381.66796875" x="-648.517578125"/>
  </node>
  <node id="74323" label="0110101001" cy:nodeId="38263">
    <graphics z="0.0" y="-529.66796875" x="-315.517578125"/>
  </node>
  <node id="74322" label="1110101101" cy:nodeId="38264">
    <graphics z="0.0" y="-358.66796875" x="741.482421875"/>
  </node>
  <node id="74321" label="0001110110" cy:nodeId="38265">
    <graphics z="0.0" y="865.33203125" x="453.482421875"/>
  </node>
  <node id="74320" label="1001110110" cy:nodeId="38266">
    <graphics z="0.0" y="770.33203125" x="-1246.517578125"/>
  </node>
  <node id="74319" label="1110101001" cy:nodeId="38267">
    <graphics z="0.0" y="-583.66796875" x="1042.482421875"/>
  </node>
  <node id="74318" label="1010101101" cy:nodeId="38268">
    <graphics z="0.0" y="-740.66796875" x="586.482421875"/>
  </node>
  <node id="74317" label="0010101101" cy:nodeId="38269">
    <graphics z="0.0" y="-400.66796875" x="-907.517578125"/>
  </node>
  <node id="74316" label="0111111001" cy:nodeId="38270">
    <graphics z="0.0" y="-110.66796875" x="-451.517578125"/>
  </node>
  <node id="74315" label="0111110101" cy:nodeId="38271">
    <graphics z="0.0" y="-165.66796875" x="-833.517578125"/>
  </node>
  <node id="74314" label="1111111001" cy:nodeId="38272">
    <graphics z="0.0" y="-261.66796875" x="936.482421875"/>
  </node>
  <node id="74313" label="1111110101" cy:nodeId="38273">
    <graphics z="0.0" y="-334.66796875" x="647.482421875"/>
  </node>
  <node id="74312" label="0110000111" cy:nodeId="38274">
    <graphics z="0.0" y="-1211.66796875" x="-667.517578125"/>
  </node>
  <node id="74311" label="0011111001" cy:nodeId="38275">
    <graphics z="0.0" y="-159.66796875" x="-535.517578125"/>
  </node>
  <node id="74310" label="0011110101" cy:nodeId="38276">
    <graphics z="0.0" y="-395.66796875" x="-827.517578125"/>
  </node>
  <node id="74309" label="1011111001" cy:nodeId="38277">
    <graphics z="0.0" y="-423.66796875" x="849.482421875"/>
  </node>
  <node id="74308" label="1011110101" cy:nodeId="38278">
    <graphics z="0.0" y="-453.66796875" x="501.482421875"/>
  </node>
  <node id="74307" label="1110000111" cy:nodeId="38279">
    <graphics z="0.0" y="-761.66796875" x="802.482421875"/>
  </node>
  <node id="74306" label="0100101101" cy:nodeId="38280">
    <graphics z="0.0" y="-576.66796875" x="-1132.517578125"/>
  </node>
  <node id="74305" label="0100101001" cy:nodeId="38281">
    <graphics z="0.0" y="-958.66796875" x="-787.517578125"/>
  </node>
  <node id="74304" label="1100101101" cy:nodeId="38282">
    <graphics z="0.0" y="-660.66796875" x="206.482421875"/>
  </node>
  <node id="74303" label="1010000111" cy:nodeId="38283">
    <graphics z="0.0" y="-1162.66796875" x="675.482421875"/>
  </node>
  <node id="74302" label="0010000111" cy:nodeId="38284">
    <graphics z="0.0" y="-1332.66796875" x="-720.517578125"/>
  </node>
  <node id="74301" label="0110110110" cy:nodeId="38285">
    <graphics z="0.0" y="710.33203125" x="577.482421875"/>
  </node>
  <node id="74300" label="1110110110" cy:nodeId="38286">
    <graphics z="0.0" y="835.33203125" x="-708.517578125"/>
  </node>
  <node id="74299" label="1100101001" cy:nodeId="38287">
    <graphics z="0.0" y="-960.66796875" x="689.482421875"/>
  </node>
  <node id="74298" label="1010101001" cy:nodeId="38288">
    <graphics z="0.0" y="-941.66796875" x="930.482421875"/>
  </node>
  <node id="74297" label="1001101001" cy:nodeId="38289">
    <graphics z="0.0" y="-970.66796875" x="850.482421875"/>
  </node>
  <node id="74296" label="1000101101" cy:nodeId="38290">
    <graphics z="0.0" y="-1052.66796875" x="287.482421875"/>
  </node>
  <node id="74295" label="1000101001" cy:nodeId="38291">
    <graphics z="0.0" y="-1179.66796875" x="599.482421875"/>
  </node>
  <node id="74294" label="0010101001" cy:nodeId="38292">
    <graphics z="0.0" y="-609.66796875" x="-365.517578125"/>
  </node>
  <node id="74293" label="0001101001" cy:nodeId="38293">
    <graphics z="0.0" y="-837.66796875" x="-616.517578125"/>
  </node>
  <node id="74292" label="0000101101" cy:nodeId="38294">
    <graphics z="0.0" y="-832.66796875" x="-997.517578125"/>
  </node>
  <node id="74291" label="0000101001" cy:nodeId="38295">
    <graphics z="0.0" y="-1067.66796875" x="-656.517578125"/>
  </node>
  <node id="74290" label="0010110110" cy:nodeId="38296">
    <graphics z="0.0" y="828.33203125" x="516.482421875"/>
  </node>
  <node id="74289" label="1010110110" cy:nodeId="38297">
    <graphics z="0.0" y="691.33203125" x="-1135.517578125"/>
  </node>
  <node id="74288" label="0101111001" cy:nodeId="38298">
    <graphics z="0.0" y="-201.66796875" x="-821.517578125"/>
  </node>
  <node id="74287" label="0101110101" cy:nodeId="38299">
    <graphics z="0.0" y="-434.66796875" x="-1095.517578125"/>
  </node>
  <node id="74286" label="1101111001" cy:nodeId="38300">
    <graphics z="0.0" y="-344.66796875" x="571.482421875"/>
  </node>
  <node id="74285" label="1101110101" cy:nodeId="38301">
    <graphics z="0.0" y="-452.66796875" x="396.482421875"/>
  </node>
  <node id="74284" label="0111101001" cy:nodeId="38302">
    <graphics z="0.0" y="-228.66796875" x="-293.517578125"/>
  </node>
  <node id="74283" label="0111001101" cy:nodeId="38303">
    <graphics z="0.0" y="-507.66796875" x="-514.517578125"/>
  </node>
  <node id="74282" label="0111001011" cy:nodeId="38304">
    <graphics z="0.0" y="-676.66796875" x="-333.517578125"/>
  </node>
  <node id="74281" label="0111001001" cy:nodeId="38305">
    <graphics z="0.0" y="-540.66796875" x="-222.517578125"/>
  </node>
  <node id="74280" label="0001111001" cy:nodeId="38306">
    <graphics z="0.0" y="-312.66796875" x="-917.517578125"/>
  </node>
  <node id="74279" label="0001110101" cy:nodeId="38307">
    <graphics z="0.0" y="-614.66796875" x="-1069.517578125"/>
  </node>
  <node id="74278" label="0100000111" cy:nodeId="38308">
    <graphics z="0.0" y="-1262.66796875" x="-1071.517578125"/>
  </node>
  <node id="74277" label="1111101001" cy:nodeId="38309">
    <graphics z="0.0" y="-429.66796875" x="1201.482421875"/>
  </node>
  <node id="74276" label="1111001101" cy:nodeId="38310">
    <graphics z="0.0" y="-617.66796875" x="862.482421875"/>
  </node>
  <node id="74275" label="1111001011" cy:nodeId="38311">
    <graphics z="0.0" y="-491.66796875" x="1167.482421875"/>
  </node>
  <node id="74274" label="1001111001" cy:nodeId="38312">
    <graphics z="0.0" y="-704.66796875" x="531.482421875"/>
  </node>
  <node id="74273" label="1001110101" cy:nodeId="38313">
    <graphics z="0.0" y="-834.66796875" x="194.482421875"/>
  </node>
  <node id="74272" label="1100000111" cy:nodeId="38314">
    <graphics z="0.0" y="-978.66796875" x="237.482421875"/>
  </node>
  <node id="74271" label="0000000111" cy:nodeId="38315">
    <graphics z="0.0" y="-1422.66796875" x="-1038.517578125"/>
  </node>
  <node id="74270" label="0111111010" cy:nodeId="38316">
    <graphics z="0.0" y="748.33203125" x="741.482421875"/>
  </node>
  <node id="74269" label="0100110110" cy:nodeId="38317">
    <graphics z="0.0" y="867.33203125" x="919.482421875"/>
  </node>
  <node id="74268" label="1111001001" cy:nodeId="38318">
    <graphics z="0.0" y="-749.66796875" x="1244.482421875"/>
  </node>
  <node id="74267" label="1011001101" cy:nodeId="38319">
    <graphics z="0.0" y="-1114.66796875" x="773.482421875"/>
  </node>
  <node id="74266" label="1011001011" cy:nodeId="38320">
    <graphics z="0.0" y="-893.66796875" x="1061.482421875"/>
  </node>
  <node id="74265" label="1011001001" cy:nodeId="38321">
    <graphics z="0.0" y="-1036.66796875" x="1194.482421875"/>
  </node>
  <node id="74264" label="0011001101" cy:nodeId="38322">
    <graphics z="0.0" y="-547.66796875" x="-710.517578125"/>
  </node>
  <node id="74263" label="0011001011" cy:nodeId="38323">
    <graphics z="0.0" y="-623.66796875" x="-441.517578125"/>
  </node>
  <node id="74262" label="0011001001" cy:nodeId="38324">
    <graphics z="0.0" y="-596.66796875" x="-289.517578125"/>
  </node>
  <node id="74261" label="1000000111" cy:nodeId="38325">
    <graphics z="0.0" y="-1340.66796875" x="339.482421875"/>
  </node>
  <node id="74260" label="1111111010" cy:nodeId="38326">
    <graphics z="0.0" y="810.33203125" x="-1099.517578125"/>
  </node>
  <node id="74259" label="1100110110" cy:nodeId="38327">
    <graphics z="0.0" y="779.33203125" x="-562.517578125"/>
  </node>
  <node id="74258" label="1011111010" cy:nodeId="38328">
    <graphics z="0.0" y="671.33203125" x="-1308.517578125"/>
  </node>
  <node id="74257" label="0011111010" cy:nodeId="38329">
    <graphics z="0.0" y="725.33203125" x="340.482421875"/>
  </node>
  <node id="74256" label="0000110110" cy:nodeId="38330">
    <graphics z="0.0" y="892.33203125" x="767.482421875"/>
  </node>
  <node id="74255" label="1000110110" cy:nodeId="38331">
    <graphics z="0.0" y="594.33203125" x="-903.517578125"/>
  </node>
  <node id="74254" label="0110111001" cy:nodeId="38332">
    <graphics z="0.0" y="-231.66796875" x="-569.517578125"/>
  </node>
  <node id="74253" label="0110110101" cy:nodeId="38333">
    <graphics z="0.0" y="-431.66796875" x="-803.517578125"/>
  </node>
  <node id="74252" label="0101101001" cy:nodeId="38334">
    <graphics z="0.0" y="-345.66796875" x="-619.517578125"/>
  </node>
  <node id="74251" label="0101001101" cy:nodeId="38335">
    <graphics z="0.0" y="-652.66796875" x="-981.517578125"/>
  </node>
  <node id="74250" label="0101001011" cy:nodeId="38336">
    <graphics z="0.0" y="-981.66796875" x="-644.517578125"/>
  </node>
  <node id="74249" label="1110111001" cy:nodeId="38337">
    <graphics z="0.0" y="-467.66796875" x="678.482421875"/>
  </node>
  <node id="74248" label="1110110101" cy:nodeId="38338">
    <graphics z="0.0" y="-489.66796875" x="501.482421875"/>
  </node>
  <node id="74247" label="1101101001" cy:nodeId="38339">
    <graphics z="0.0" y="-619.66796875" x="1002.482421875"/>
  </node>
  <node id="74246" label="1101001101" cy:nodeId="38340">
    <graphics z="0.0" y="-1005.66796875" x="601.482421875"/>
  </node>
  <node id="74245" label="1101001011" cy:nodeId="38341">
    <graphics z="0.0" y="-799.66796875" x="934.482421875"/>
  </node>
  <node id="74244" label="0111100110" cy:nodeId="38342">
    <graphics z="0.0" y="1118.33203125" x="366.482421875"/>
  </node>
  <node id="74243" label="1111100110" cy:nodeId="38343">
    <graphics z="0.0" y="1151.33203125" x="-1237.517578125"/>
  </node>
  <node id="74242" label="1001001101" cy:nodeId="38344">
    <graphics z="0.0" y="-1330.66796875" x="492.482421875"/>
  </node>
  <node id="74241" label="1001001011" cy:nodeId="38345">
    <graphics z="0.0" y="-1033.66796875" x="873.482421875"/>
  </node>
  <node id="74240" label="0101111010" cy:nodeId="38346">
    <graphics z="0.0" y="784.33203125" x="751.482421875"/>
  </node>
  <node id="74239" label="0010111001" cy:nodeId="38347">
    <graphics z="0.0" y="-439.66796875" x="-584.517578125"/>
  </node>
  <node id="74238" label="0010110101" cy:nodeId="38348">
    <graphics z="0.0" y="-580.66796875" x="-920.517578125"/>
  </node>
  <node id="74237" label="0011100110" cy:nodeId="38349">
    <graphics z="0.0" y="994.33203125" x="276.482421875"/>
  </node>
  <node id="74236" label="1011100110" cy:nodeId="38350">
    <graphics z="0.0" y="972.33203125" x="-1389.517578125"/>
  </node>
  <node id="74235" label="0001001101" cy:nodeId="38351">
    <graphics z="0.0" y="-724.66796875" x="-978.517578125"/>
  </node>
  <node id="74234" label="0001001011" cy:nodeId="38352">
    <graphics z="0.0" y="-945.66796875" x="-671.517578125"/>
  </node>
  <node id="74233" label="1010111001" cy:nodeId="38353">
    <graphics z="0.0" y="-647.66796875" x="760.482421875"/>
  </node>
  <node id="74232" label="1010110101" cy:nodeId="38354">
    <graphics z="0.0" y="-722.66796875" x="359.482421875"/>
  </node>
  <node id="74231" label="1101111010" cy:nodeId="38355">
    <graphics z="0.0" y="820.33203125" x="-1018.517578125"/>
  </node>
  <node id="74230" label="1011101010" cy:nodeId="38356">
    <graphics z="0.0" y="935.33203125" x="-1287.517578125"/>
  </node>
  <node id="74229" label="1001111010" cy:nodeId="38357">
    <graphics z="0.0" y="640.33203125" x="-1171.517578125"/>
  </node>
  <node id="74228" label="0011101010" cy:nodeId="38358">
    <graphics z="0.0" y="1062.33203125" x="314.482421875"/>
  </node>
  <node id="74227" label="0001111010" cy:nodeId="38359">
    <graphics z="0.0" y="814.33203125" x="592.482421875"/>
  </node>
  <node id="74226" label="1111011110" cy:nodeId="38360">
    <graphics z="0.0" y="936.33203125" x="-974.517578125"/>
  </node>
  <node id="74225" label="0111011110" cy:nodeId="38361">
    <graphics z="0.0" y="759.33203125" x="1040.482421875"/>
  </node>
  <node id="74224" label="0100111001" cy:nodeId="38362">
    <graphics z="0.0" y="-470.66796875" x="-1029.517578125"/>
  </node>
  <node id="74223" label="0100110101" cy:nodeId="38363">
    <graphics z="0.0" y="-794.66796875" x="-1065.517578125"/>
  </node>
  <node id="74222" label="1100111001" cy:nodeId="38364">
    <graphics z="0.0" y="-668.66796875" x="601.482421875"/>
  </node>
  <node id="74221" label="1100110101" cy:nodeId="38365">
    <graphics z="0.0" y="-654.66796875" x="94.482421875"/>
  </node>
  <node id="74220" label="0101100110" cy:nodeId="38366">
    <graphics z="0.0" y="1243.33203125" x="498.482421875"/>
  </node>
  <node id="74219" label="0011011110" cy:nodeId="38367">
    <graphics z="0.0" y="1038.33203125" x="741.482421875"/>
  </node>
  <node id="74218" label="1101100110" cy:nodeId="38368">
    <graphics z="0.0" y="1094.33203125" x="-1011.517578125"/>
  </node>
  <node id="74217" label="1011011110" cy:nodeId="38369">
    <graphics z="0.0" y="729.33203125" x="-1175.517578125"/>
  </node>
  <node id="74216" label="0000111001" cy:nodeId="38370">
    <graphics z="0.0" y="-796.66796875" x="-989.517578125"/>
  </node>
  <node id="74215" label="0000110101" cy:nodeId="38371">
    <graphics z="0.0" y="-933.66796875" x="-1233.517578125"/>
  </node>
  <node id="74214" label="0110001101" cy:nodeId="38372">
    <graphics z="0.0" y="-764.66796875" x="-862.517578125"/>
  </node>
  <node id="74213" label="0110001011" cy:nodeId="38373">
    <graphics z="0.0" y="-822.66796875" x="-444.517578125"/>
  </node>
  <node id="74212" label="0110001001" cy:nodeId="38374">
    <graphics z="0.0" y="-781.66796875" x="-390.517578125"/>
  </node>
  <node id="74211" label="1000111001" cy:nodeId="38375">
    <graphics z="0.0" y="-1004.66796875" x="380.482421875"/>
  </node>
  <node id="74210" label="1000110101" cy:nodeId="38376">
    <graphics z="0.0" y="-983.66796875" x="83.482421875"/>
  </node>
  <node id="74209" label="1110001101" cy:nodeId="38377">
    <graphics z="0.0" y="-924.66796875" x="720.482421875"/>
  </node>
  <node id="74208" label="1110001011" cy:nodeId="38378">
    <graphics z="0.0" y="-732.66796875" x="1121.482421875"/>
  </node>
  <node id="74207" label="0001100110" cy:nodeId="38379">
    <graphics z="0.0" y="1104.33203125" x="472.482421875"/>
  </node>
  <node id="74206" label="1001100110" cy:nodeId="38380">
    <graphics z="0.0" y="899.33203125" x="-1256.517578125"/>
  </node>
  <node id="74205" label="0010001101" cy:nodeId="38381">
    <graphics z="0.0" y="-751.66796875" x="-786.517578125"/>
  </node>
  <node id="74204" label="0010001011" cy:nodeId="38382">
    <graphics z="0.0" y="-1013.66796875" x="-413.517578125"/>
  </node>
  <node id="74203" label="0010001001" cy:nodeId="38383">
    <graphics z="0.0" y="-858.66796875" x="-395.517578125"/>
  </node>
  <node id="74202" label="1110001001" cy:nodeId="38384">
    <graphics z="0.0" y="-981.66796875" x="1127.482421875"/>
  </node>
  <node id="74201" label="1010001101" cy:nodeId="38385">
    <graphics z="0.0" y="-1259.66796875" x="557.482421875"/>
  </node>
  <node id="74200" label="1010001011" cy:nodeId="38386">
    <graphics z="0.0" y="-977.66796875" x="931.482421875"/>
  </node>
  <node id="74199" label="1010001001" cy:nodeId="38387">
    <graphics z="0.0" y="-1240.66796875" x="999.482421875"/>
  </node>
  <node id="74198" label="0110111010" cy:nodeId="38388">
    <graphics z="0.0" y="669.33203125" x="884.482421875"/>
  </node>
  <node id="74197" label="0110101010" cy:nodeId="38389">
    <graphics z="0.0" y="1202.33203125" x="737.482421875"/>
  </node>
  <node id="74196" label="1110111010" cy:nodeId="38390">
    <graphics z="0.0" y="889.33203125" x="-734.517578125"/>
  </node>
  <node id="74195" label="1111011001" cy:nodeId="38391">
    <graphics z="0.0" y="-537.66796875" x="845.482421875"/>
  </node>
  <node id="74194" label="1111010101" cy:nodeId="38392">
    <graphics z="0.0" y="-725.66796875" x="762.482421875"/>
  </node>
  <node id="74193" label="1111010011" cy:nodeId="38393">
    <graphics z="0.0" y="-547.66796875" x="1022.482421875"/>
  </node>
  <node id="74192" label="1111010001" cy:nodeId="38394">
    <graphics z="0.0" y="-886.66796875" x="1148.482421875"/>
  </node>
  <node id="74191" label="0111011001" cy:nodeId="38395">
    <graphics z="0.0" y="-422.66796875" x="-370.517578125"/>
  </node>
  <node id="74190" label="0111010101" cy:nodeId="38396">
    <graphics z="0.0" y="-687.66796875" x="-620.517578125"/>
  </node>
  <node id="74189" label="0111010011" cy:nodeId="38397">
    <graphics z="0.0" y="-712.66796875" x="-385.517578125"/>
  </node>
  <node id="74188" label="0111010001" cy:nodeId="38398">
    <graphics z="0.0" y="-668.66796875" x="-199.517578125"/>
  </node>
  <node id="74187" label="1110101010" cy:nodeId="38399">
    <graphics z="0.0" y="1158.33203125" x="-867.517578125"/>
  </node>
  <node id="74186" label="1010111010" cy:nodeId="38400">
    <graphics z="0.0" y="712.33203125" x="-1030.517578125"/>
  </node>
  <node id="74185" label="0101011110" cy:nodeId="38401">
    <graphics z="0.0" y="963.33203125" x="1288.482421875"/>
  </node>
  <node id="74184" label="0010111010" cy:nodeId="38402">
    <graphics z="0.0" y="675.33203125" x="495.482421875"/>
  </node>
  <node id="74183" label="1101011110" cy:nodeId="38403">
    <graphics z="0.0" y="1034.33203125" x="-794.517578125"/>
  </node>
  <node id="74182" label="0011011001" cy:nodeId="38404">
    <graphics z="0.0" y="-277.66796875" x="-480.517578125"/>
  </node>
  <node id="74181" label="0011010101" cy:nodeId="38405">
    <graphics z="0.0" y="-800.66796875" x="-850.517578125"/>
  </node>
  <node id="74180" label="0011010011" cy:nodeId="38406">
    <graphics z="0.0" y="-786.66796875" x="-493.517578125"/>
  </node>
  <node id="74179" label="0011010001" cy:nodeId="38407">
    <graphics z="0.0" y="-860.66796875" x="-526.517578125"/>
  </node>
  <node id="74178" label="1011011001" cy:nodeId="38408">
    <graphics z="0.0" y="-869.66796875" x="857.482421875"/>
  </node>
  <node id="74177" label="1011010101" cy:nodeId="38409">
    <graphics z="0.0" y="-1041.66796875" x="632.482421875"/>
  </node>
  <node id="74176" label="1011010011" cy:nodeId="38410">
    <graphics z="0.0" y="-905.66796875" x="893.482421875"/>
  </node>
  <node id="74175" label="1011010001" cy:nodeId="38411">
    <graphics z="0.0" y="-1195.66796875" x="902.482421875"/>
  </node>
  <node id="74174" label="0001011110" cy:nodeId="38412">
    <graphics z="0.0" y="1163.33203125" x="1024.482421875"/>
  </node>
  <node id="74173" label="1001011110" cy:nodeId="38413">
    <graphics z="0.0" y="967.33203125" x="-1055.517578125"/>
  </node>
  <node id="74172" label="0101001001" cy:nodeId="38414">
    <graphics z="0.0" y="-801.66796875" x="-645.517578125"/>
  </node>
  <node id="74171" label="0100001101" cy:nodeId="38415">
    <graphics z="0.0" y="-976.66796875" x="-1137.517578125"/>
  </node>
  <node id="74170" label="0100001011" cy:nodeId="38416">
    <graphics z="0.0" y="-1153.66796875" x="-1010.517578125"/>
  </node>
  <node id="74169" label="0100001001" cy:nodeId="38417">
    <graphics z="0.0" y="-994.66796875" x="-787.517578125"/>
  </node>
  <node id="74168" label="1101001001" cy:nodeId="38418">
    <graphics z="0.0" y="-1044.66796875" x="990.482421875"/>
  </node>
  <node id="74167" label="1100001101" cy:nodeId="38419">
    <graphics z="0.0" y="-1088.66796875" x="246.482421875"/>
  </node>
  <node id="74166" label="1100001011" cy:nodeId="38420">
    <graphics z="0.0" y="-810.66796875" x="679.482421875"/>
  </node>
  <node id="74165" label="0110100110" cy:nodeId="38421">
    <graphics z="0.0" y="1013.33203125" x="665.482421875"/>
  </node>
  <node id="74164" label="1110100110" cy:nodeId="38422">
    <graphics z="0.0" y="1091.33203125" x="-902.517578125"/>
  </node>
  <node id="74163" label="0001001001" cy:nodeId="38423">
    <graphics z="0.0" y="-909.66796875" x="-656.517578125"/>
  </node>
  <node id="74162" label="0000001101" cy:nodeId="38424">
    <graphics z="0.0" y="-1030.66796875" x="-1198.517578125"/>
  </node>
  <node id="74161" label="0000001011" cy:nodeId="38425">
    <graphics z="0.0" y="-1196.66796875" x="-803.517578125"/>
  </node>
  <node id="74160" label="0000001001" cy:nodeId="38426">
    <graphics z="0.0" y="-1253.66796875" x="-770.517578125"/>
  </node>
  <node id="74159" label="1100001001" cy:nodeId="38427">
    <graphics z="0.0" y="-1315.66796875" x="751.482421875"/>
  </node>
  <node id="74158" label="1001001001" cy:nodeId="38428">
    <graphics z="0.0" y="-1342.66796875" x="856.482421875"/>
  </node>
  <node id="74157" label="1000001101" cy:nodeId="38429">
    <graphics z="0.0" y="-1376.66796875" x="286.482421875"/>
  </node>
  <node id="74156" label="1000001011" cy:nodeId="38430">
    <graphics z="0.0" y="-1279.66796875" x="723.482421875"/>
  </node>
  <node id="74155" label="1000001001" cy:nodeId="38431">
    <graphics z="0.0" y="-1416.66796875" x="626.482421875"/>
  </node>
  <node id="74154" label="0100111010" cy:nodeId="38432">
    <graphics z="0.0" y="975.33203125" x="1000.482421875"/>
  </node>
  <node id="74153" label="0100101010" cy:nodeId="38433">
    <graphics z="0.0" y="1164.33203125" x="1101.482421875"/>
  </node>
  <node id="74152" label="0010100110" cy:nodeId="38434">
    <graphics z="0.0" y="1149.33203125" x="487.482421875"/>
  </node>
  <node id="74151" label="1100111010" cy:nodeId="38435">
    <graphics z="0.0" y="833.33203125" x="-632.517578125"/>
  </node>
  <node id="74150" label="1010100110" cy:nodeId="38436">
    <graphics z="0.0" y="1015.33203125" x="-1055.517578125"/>
  </node>
  <node id="74149" label="0101011001" cy:nodeId="38437">
    <graphics z="0.0" y="-621.66796875" x="-782.517578125"/>
  </node>
  <node id="74148" label="0101010101" cy:nodeId="38438">
    <graphics z="0.0" y="-1009.66796875" x="-1058.517578125"/>
  </node>
  <node id="74147" label="0101010011" cy:nodeId="38439">
    <graphics z="0.0" y="-1031.66796875" x="-674.517578125"/>
  </node>
  <node id="74146" label="1101011001" cy:nodeId="38440">
    <graphics z="0.0" y="-820.66796875" x="551.482421875"/>
  </node>
  <node id="74145" label="1101010101" cy:nodeId="38441">
    <graphics z="0.0" y="-814.66796875" x="372.482421875"/>
  </node>
  <node id="74144" label="1101010011" cy:nodeId="38442">
    <graphics z="0.0" y="-665.66796875" x="684.482421875"/>
  </node>
  <node id="74143" label="1100101010" cy:nodeId="38443">
    <graphics z="0.0" y="1112.33203125" x="-618.517578125"/>
  </node>
  <node id="74142" label="1010101010" cy:nodeId="38444">
    <graphics z="0.0" y="983.33203125" x="-870.517578125"/>
  </node>
  <node id="74141" label="1001101010" cy:nodeId="38445">
    <graphics z="0.0" y="1008.33203125" x="-1172.517578125"/>
  </node>
  <node id="74140" label="1000111010" cy:nodeId="38446">
    <graphics z="0.0" y="738.33203125" x="-789.517578125"/>
  </node>
  <node id="74139" label="1000101010" cy:nodeId="38447">
    <graphics z="0.0" y="1070.33203125" x="-755.517578125"/>
  </node>
  <node id="74138" label="0010101010" cy:nodeId="38448">
    <graphics z="0.0" y="1093.33203125" x="548.482421875"/>
  </node>
  <node id="74137" label="0001101010" cy:nodeId="38449">
    <graphics z="0.0" y="1120.33203125" x="627.482421875"/>
  </node>
  <node id="74136" label="0000111010" cy:nodeId="38450">
    <graphics z="0.0" y="687.33203125" x="808.482421875"/>
  </node>
  <node id="74135" label="0000101010" cy:nodeId="38451">
    <graphics z="0.0" y="1285.33203125" x="765.482421875"/>
  </node>
  <node id="74134" label="0001011001" cy:nodeId="38452">
    <graphics z="0.0" y="-585.66796875" x="-830.517578125"/>
  </node>
  <node id="74133" label="0001010101" cy:nodeId="38453">
    <graphics z="0.0" y="-1143.66796875" x="-1143.517578125"/>
  </node>
  <node id="74132" label="0001010011" cy:nodeId="38454">
    <graphics z="0.0" y="-1175.66796875" x="-686.517578125"/>
  </node>
  <node id="74131" label="1001011001" cy:nodeId="38455">
    <graphics z="0.0" y="-1186.66796875" x="447.482421875"/>
  </node>
  <node id="74130" label="1001010101" cy:nodeId="38456">
    <graphics z="0.0" y="-1170.66796875" x="312.482421875"/>
  </node>
  <node id="74129" label="1001010011" cy:nodeId="38457">
    <graphics z="0.0" y="-928.66796875" x="602.482421875"/>
  </node>
  <node id="74128" label="0110011110" cy:nodeId="38458">
    <graphics z="0.0" y="821.33203125" x="1256.482421875"/>
  </node>
  <node id="74127" label="1110011110" cy:nodeId="38459">
    <graphics z="0.0" y="1031.33203125" x="-520.517578125"/>
  </node>
  <node id="74126" label="0111101010" cy:nodeId="38460">
    <graphics z="0.0" y="1034.33203125" x="443.482421875"/>
  </node>
  <node id="74125" label="0100100110" cy:nodeId="38461">
    <graphics z="0.0" y="1166.33203125" x="778.482421875"/>
  </node>
  <node id="74124" label="0010011110" cy:nodeId="38462">
    <graphics z="0.0" y="867.33203125" x="1001.482421875"/>
  </node>
  <node id="74123" label="1111101010" cy:nodeId="38463">
    <graphics z="0.0" y="1079.33203125" x="-1155.517578125"/>
  </node>
  <node id="74122" label="1100100110" cy:nodeId="38464">
    <graphics z="0.0" y="1076.33203125" x="-645.517578125"/>
  </node>
  <node id="74121" label="1010011110" cy:nodeId="38465">
    <graphics z="0.0" y="926.33203125" x="-657.517578125"/>
  </node>
  <node id="74120" label="0000100110" cy:nodeId="38466">
    <graphics z="0.0" y="1112.33203125" x="712.482421875"/>
  </node>
  <node id="74119" label="1000100110" cy:nodeId="38467">
    <graphics z="0.0" y="925.33203125" x="-738.517578125"/>
  </node>
  <node id="74118" label="0110011001" cy:nodeId="38468">
    <graphics z="0.0" y="-723.66796875" x="-613.517578125"/>
  </node>
  <node id="74117" label="0110010101" cy:nodeId="38469">
    <graphics z="0.0" y="-944.66796875" x="-919.517578125"/>
  </node>
  <node id="74116" label="0110010011" cy:nodeId="38470">
    <graphics z="0.0" y="-988.66796875" x="-552.517578125"/>
  </node>
  <node id="74115" label="0110010001" cy:nodeId="38471">
    <graphics z="0.0" y="-941.66796875" x="-428.517578125"/>
  </node>
  <node id="74114" label="0111110001" cy:nodeId="38472">
    <graphics z="0.0" y="-238.66796875" x="-408.517578125"/>
  </node>
  <node id="74113" label="0111100101" cy:nodeId="38473">
    <graphics z="0.0" y="-303.66796875" x="-401.517578125"/>
  </node>
  <node id="74112" label="1110011001" cy:nodeId="38474">
    <graphics z="0.0" y="-967.66796875" x="774.482421875"/>
  </node>
  <node id="74111" label="1110010101" cy:nodeId="38475">
    <graphics z="0.0" y="-741.66796875" x="469.482421875"/>
  </node>
  <node id="74110" label="1110010011" cy:nodeId="38476">
    <graphics z="0.0" y="-833.66796875" x="806.482421875"/>
  </node>
  <node id="74109" label="1110010001" cy:nodeId="38477">
    <graphics z="0.0" y="-1069.66796875" x="851.482421875"/>
  </node>
  <node id="74108" label="1111110001" cy:nodeId="38478">
    <graphics z="0.0" y="-435.66796875" x="959.482421875"/>
  </node>
  <node id="74107" label="1111100101" cy:nodeId="38479">
    <graphics z="0.0" y="-575.66796875" x="776.482421875"/>
  </node>
  <node id="74106" label="0100011110" cy:nodeId="38480">
    <graphics z="0.0" y="959.33203125" x="1488.482421875"/>
  </node>
  <node id="74105" label="1100011110" cy:nodeId="38481">
    <graphics z="0.0" y="869.33203125" x="-245.517578125"/>
  </node>
  <node id="74104" label="1010011001" cy:nodeId="38482">
    <graphics z="0.0" y="-931.66796875" x="803.482421875"/>
  </node>
  <node id="74103" label="1010010101" cy:nodeId="38483">
    <graphics z="0.0" y="-1182.66796875" x="523.482421875"/>
  </node>
  <node id="74102" label="1010010011" cy:nodeId="38484">
    <graphics z="0.0" y="-888.66796875" x="695.482421875"/>
  </node>
  <node id="74101" label="1010010001" cy:nodeId="38485">
    <graphics z="0.0" y="-1232.66796875" x="844.482421875"/>
  </node>
  <node id="74100" label="1011101100" cy:nodeId="38486">
    <graphics z="0.0" y="1304.33203125" x="-936.517578125"/>
  </node>
  <node id="74099" label="0011101100" cy:nodeId="38487">
    <graphics z="0.0" y="1156.33203125" x="600.482421875"/>
  </node>
  <node id="74098" label="0010011001" cy:nodeId="38488">
    <graphics z="0.0" y="-657.66796875" x="-727.517578125"/>
  </node>
  <node id="74097" label="0010010101" cy:nodeId="38489">
    <graphics z="0.0" y="-1088.66796875" x="-886.517578125"/>
  </node>
  <node id="74096" label="0010010011" cy:nodeId="38490">
    <graphics z="0.0" y="-1160.66796875" x="-762.517578125"/>
  </node>
  <node id="74095" label="0010010001" cy:nodeId="38491">
    <graphics z="0.0" y="-1154.66796875" x="-551.517578125"/>
  </node>
  <node id="74094" label="0101101010" cy:nodeId="38492">
    <graphics z="0.0" y="1130.33203125" x="812.482421875"/>
  </node>
  <node id="74093" label="1011110001" cy:nodeId="38493">
    <graphics z="0.0" y="-727.66796875" x="937.482421875"/>
  </node>
  <node id="74092" label="1011100101" cy:nodeId="38494">
    <graphics z="0.0" y="-797.66796875" x="831.482421875"/>
  </node>
  <node id="74091" label="0011110001" cy:nodeId="38495">
    <graphics z="0.0" y="-359.66796875" x="-515.517578125"/>
  </node>
  <node id="74090" label="0011100101" cy:nodeId="38496">
    <graphics z="0.0" y="-551.66796875" x="-514.517578125"/>
  </node>
  <node id="74089" label="0000011110" cy:nodeId="38497">
    <graphics z="0.0" y="891.33203125" x="1346.482421875"/>
  </node>
  <node id="74088" label="1000011110" cy:nodeId="38498">
    <graphics z="0.0" y="783.33203125" x="-480.517578125"/>
  </node>
  <node id="74087" label="1101101010" cy:nodeId="38499">
    <graphics z="0.0" y="1170.33203125" x="-1026.517578125"/>
  </node>
  <node id="74086" label="0101010001" cy:nodeId="38500">
    <graphics z="0.0" y="-1024.66796875" x="-515.517578125"/>
  </node>
  <node id="74085" label="0100011001" cy:nodeId="38501">
    <graphics z="0.0" y="-1073.66796875" x="-799.517578125"/>
  </node>
  <node id="74084" label="0100010101" cy:nodeId="38502">
    <graphics z="0.0" y="-1226.66796875" x="-1075.517578125"/>
  </node>
  <node id="74083" label="0100010011" cy:nodeId="38503">
    <graphics z="0.0" y="-1311.66796875" x="-867.517578125"/>
  </node>
  <node id="74082" label="0100010001" cy:nodeId="38504">
    <graphics z="0.0" y="-1296.66796875" x="-671.517578125"/>
  </node>
  <node id="74081" label="0101110001" cy:nodeId="38505">
    <graphics z="0.0" y="-511.66796875" x="-680.517578125"/>
  </node>
  <node id="74080" label="0101100101" cy:nodeId="38506">
    <graphics z="0.0" y="-503.66796875" x="-771.517578125"/>
  </node>
  <node id="74079" label="1101010001" cy:nodeId="38507">
    <graphics z="0.0" y="-1006.66796875" x="708.482421875"/>
  </node>
  <node id="74078" label="1100011001" cy:nodeId="38508">
    <graphics z="0.0" y="-1137.66796875" x="412.482421875"/>
  </node>
  <node id="74077" label="1100010101" cy:nodeId="38509">
    <graphics z="0.0" y="-1014.66796875" x="273.482421875"/>
  </node>
  <node id="74076" label="1100010011" cy:nodeId="38510">
    <graphics z="0.0" y="-1040.66796875" x="371.482421875"/>
  </node>
  <node id="74075" label="1100010001" cy:nodeId="38511">
    <graphics z="0.0" y="-1142.66796875" x="568.482421875"/>
  </node>
  <node id="74074" label="1101110001" cy:nodeId="38512">
    <graphics z="0.0" y="-557.66796875" x="665.482421875"/>
  </node>
  <node id="74073" label="1101100101" cy:nodeId="38513">
    <graphics z="0.0" y="-704.66796875" x="607.482421875"/>
  </node>
  <node id="74072" label="1011100001" cy:nodeId="38514">
    <graphics z="0.0" y="-875.66796875" x="1224.482421875"/>
  </node>
  <node id="74071" label="1001110001" cy:nodeId="38515">
    <graphics z="0.0" y="-846.66796875" x="723.482421875"/>
  </node>
  <node id="74070" label="1001100101" cy:nodeId="38516">
    <graphics z="0.0" y="-1101.66796875" x="473.482421875"/>
  </node>
  <node id="74069" label="0011100001" cy:nodeId="38517">
    <graphics z="0.0" y="-704.66796875" x="-194.517578125"/>
  </node>
  <node id="74068" label="0001110001" cy:nodeId="38518">
    <graphics z="0.0" y="-729.66796875" x="-710.517578125"/>
  </node>
  <node id="74067" label="0001100101" cy:nodeId="38519">
    <graphics z="0.0" y="-616.66796875" x="-941.517578125"/>
  </node>
  <node id="74066" label="0001010001" cy:nodeId="38520">
    <graphics z="0.0" y="-1060.66796875" x="-563.517578125"/>
  </node>
  <node id="74065" label="0000011001" cy:nodeId="38521">
    <graphics z="0.0" y="-973.66796875" x="-1014.517578125"/>
  </node>
  <node id="74064" label="0000010101" cy:nodeId="38522">
    <graphics z="0.0" y="-1337.66796875" x="-1193.517578125"/>
  </node>
  <node id="74063" label="0000010011" cy:nodeId="38523">
    <graphics z="0.0" y="-1386.66796875" x="-978.517578125"/>
  </node>
  <node id="74062" label="0000010001" cy:nodeId="38524">
    <graphics z="0.0" y="-1347.66796875" x="-821.517578125"/>
  </node>
  <node id="74061" label="1001010001" cy:nodeId="38525">
    <graphics z="0.0" y="-1238.66796875" x="633.482421875"/>
  </node>
  <node id="74060" label="1000011001" cy:nodeId="38526">
    <graphics z="0.0" y="-1146.66796875" x="492.482421875"/>
  </node>
  <node id="74059" label="1000010101" cy:nodeId="38527">
    <graphics z="0.0" y="-1308.66796875" x="164.482421875"/>
  </node>
  <node id="74058" label="1000010011" cy:nodeId="38528">
    <graphics z="0.0" y="-1258.66796875" x="466.482421875"/>
  </node>
  <node id="74057" label="1000010001" cy:nodeId="38529">
    <graphics z="0.0" y="-1387.66796875" x="456.482421875"/>
  </node>
  <node id="74056" label="0110101100" cy:nodeId="38530">
    <graphics z="0.0" y="1208.33203125" x="983.482421875"/>
  </node>
  <node id="74055" label="1110101100" cy:nodeId="38531">
    <graphics z="0.0" y="1313.33203125" x="-462.517578125"/>
  </node>
  <node id="74054" label="0110110001" cy:nodeId="38532">
    <graphics z="0.0" y="-587.66796875" x="-460.517578125"/>
  </node>
  <node id="74053" label="0110100101" cy:nodeId="38533">
    <graphics z="0.0" y="-699.66796875" x="-537.517578125"/>
  </node>
  <node id="74052" label="0110100001" cy:nodeId="38534">
    <graphics z="0.0" y="-811.66796875" x="-163.517578125"/>
  </node>
  <node id="74051" label="1110110001" cy:nodeId="38535">
    <graphics z="0.0" y="-545.66796875" x="921.482421875"/>
  </node>
  <node id="74050" label="1110100101" cy:nodeId="38536">
    <graphics z="0.0" y="-689.66796875" x="814.482421875"/>
  </node>
  <node id="74049" label="0100101100" cy:nodeId="38537">
    <graphics z="0.0" y="1250.33203125" x="1227.482421875"/>
  </node>
  <node id="74048" label="1110100001" cy:nodeId="38538">
    <graphics z="0.0" y="-785.66796875" x="1254.482421875"/>
  </node>
  <node id="74047" label="1010110001" cy:nodeId="38539">
    <graphics z="0.0" y="-581.66796875" x="885.482421875"/>
  </node>
  <node id="74046" label="1010100101" cy:nodeId="38540">
    <graphics z="0.0" y="-892.66796875" x="582.482421875"/>
  </node>
  <node id="74045" label="0010110001" cy:nodeId="38541">
    <graphics z="0.0" y="-853.66796875" x="-319.517578125"/>
  </node>
  <node id="74044" label="0010100101" cy:nodeId="38542">
    <graphics z="0.0" y="-728.66796875" x="-875.517578125"/>
  </node>
  <node id="74043" label="1100101100" cy:nodeId="38543">
    <graphics z="0.0" y="1217.33203125" x="-227.517578125"/>
  </node>
  <node id="74042" label="1010101100" cy:nodeId="38544">
    <graphics z="0.0" y="1310.33203125" x="-645.517578125"/>
  </node>
  <node id="74041" label="1001101100" cy:nodeId="38545">
    <graphics z="0.0" y="1274.33203125" x="-668.517578125"/>
  </node>
  <node id="74040" label="1000101100" cy:nodeId="38546">
    <graphics z="0.0" y="1233.33203125" x="-330.517578125"/>
  </node>
  <node id="74039" label="0010101100" cy:nodeId="38547">
    <graphics z="0.0" y="1155.33203125" x="922.482421875"/>
  </node>
  <node id="74038" label="0001101100" cy:nodeId="38548">
    <graphics z="0.0" y="1294.33203125" x="872.482421875"/>
  </node>
  <node id="74037" label="0000101100" cy:nodeId="38549">
    <graphics z="0.0" y="1236.33203125" x="1086.482421875"/>
  </node>
  <node id="74036" label="0111101100" cy:nodeId="38550">
    <graphics z="0.0" y="1058.33203125" x="828.482421875"/>
  </node>
  <node id="74035" label="0111001110" cy:nodeId="38551">
    <graphics z="0.0" y="1083.33203125" x="947.482421875"/>
  </node>
  <node id="74034" label="0111001100" cy:nodeId="38552">
    <graphics z="0.0" y="831.33203125" x="1131.482421875"/>
  </node>
  <node id="74033" label="1111101100" cy:nodeId="38553">
    <graphics z="0.0" y="1289.33203125" x="-796.517578125"/>
  </node>
  <node id="74032" label="1111001110" cy:nodeId="38554">
    <graphics z="0.0" y="1263.33203125" x="-932.517578125"/>
  </node>
  <node id="74031" label="0100110001" cy:nodeId="38555">
    <graphics z="0.0" y="-922.66796875" x="-788.517578125"/>
  </node>
  <node id="74030" label="0100100101" cy:nodeId="38556">
    <graphics z="0.0" y="-886.66796875" x="-804.517578125"/>
  </node>
  <node id="74029" label="0100100001" cy:nodeId="38557">
    <graphics z="0.0" y="-1101.66796875" x="-543.517578125"/>
  </node>
  <node id="74028" label="1100110001" cy:nodeId="38558">
    <graphics z="0.0" y="-777.66796875" x="459.482421875"/>
  </node>
  <node id="74027" label="1100100101" cy:nodeId="38559">
    <graphics z="0.0" y="-849.66796875" x="459.482421875"/>
  </node>
  <node id="74026" label="0011001110" cy:nodeId="38560">
    <graphics z="0.0" y="1249.33203125" x="760.482421875"/>
  </node>
  <node id="74025" label="1111001100" cy:nodeId="38561">
    <graphics z="0.0" y="1200.33203125" x="-608.517578125"/>
  </node>
  <node id="74024" label="1011001110" cy:nodeId="38562">
    <graphics z="0.0" y="1137.33203125" x="-1153.517578125"/>
  </node>
  <node id="74023" label="1100100001" cy:nodeId="38563">
    <graphics z="0.0" y="-876.66796875" x="985.482421875"/>
  </node>
  <node id="74022" label="1010100001" cy:nodeId="38564">
    <graphics z="0.0" y="-987.66796875" x="1047.482421875"/>
  </node>
  <node id="74021" label="1001100001" cy:nodeId="38565">
    <graphics z="0.0" y="-1112.66796875" x="918.482421875"/>
  </node>
  <node id="74020" label="1000110001" cy:nodeId="38566">
    <graphics z="0.0" y="-921.66796875" x="388.482421875"/>
  </node>
  <node id="74019" label="1000100101" cy:nodeId="38567">
    <graphics z="0.0" y="-1231.66796875" x="302.482421875"/>
  </node>
  <node id="74018" label="1000100001" cy:nodeId="38568">
    <graphics z="0.0" y="-1199.66796875" x="744.482421875"/>
  </node>
  <node id="74017" label="0010100001" cy:nodeId="38569">
    <graphics z="0.0" y="-969.66796875" x="-326.517578125"/>
  </node>
  <node id="74016" label="0001100001" cy:nodeId="38570">
    <graphics z="0.0" y="-822.66796875" x="-520.517578125"/>
  </node>
  <node id="74015" label="0000110001" cy:nodeId="38571">
    <graphics z="0.0" y="-1200.66796875" x="-890.517578125"/>
  </node>
  <node id="74014" label="0000100101" cy:nodeId="38572">
    <graphics z="0.0" y="-1081.66796875" x="-1010.517578125"/>
  </node>
  <node id="74013" label="0000100001" cy:nodeId="38573">
    <graphics z="0.0" y="-1225.66796875" x="-565.517578125"/>
  </node>
  <node id="74012" label="0111100001" cy:nodeId="38574">
    <graphics z="0.0" y="-498.66796875" x="-150.517578125"/>
  </node>
  <node id="74011" label="0111000101" cy:nodeId="38575">
    <graphics z="0.0" y="-749.66796875" x="-313.517578125"/>
  </node>
  <node id="74010" label="0111000011" cy:nodeId="38576">
    <graphics z="0.0" y="-817.66796875" x="-364.517578125"/>
  </node>
  <node id="74009" label="0111000001" cy:nodeId="38577">
    <graphics z="0.0" y="-915.66796875" x="-130.517578125"/>
  </node>
  <node id="74008" label="1111100001" cy:nodeId="38578">
    <graphics z="0.0" y="-610.66796875" x="1190.482421875"/>
  </node>
  <node id="74007" label="1111000101" cy:nodeId="38579">
    <graphics z="0.0" y="-943.66796875" x="1013.482421875"/>
  </node>
  <node id="74006" label="1111000011" cy:nodeId="38580">
    <graphics z="0.0" y="-619.66796875" x="1294.482421875"/>
  </node>
  <node id="74005" label="0101101100" cy:nodeId="38581">
    <graphics z="0.0" y="1344.33203125" x="1010.482421875"/>
  </node>
  <node id="74004" label="0101001110" cy:nodeId="38582">
    <graphics z="0.0" y="1308.33203125" x="1166.482421875"/>
  </node>
  <node id="74003" label="1101101100" cy:nodeId="38583">
    <graphics z="0.0" y="1271.33203125" x="-490.517578125"/>
  </node>
  <node id="74002" label="1101001110" cy:nodeId="38584">
    <graphics z="0.0" y="1106.33203125" x="-809.517578125"/>
  </node>
  <node id="74001" label="1111000001" cy:nodeId="38585">
    <graphics z="0.0" y="-939.66796875" x="1312.482421875"/>
  </node>
  <node id="74000" label="1011000101" cy:nodeId="38586">
    <graphics z="0.0" y="-1204.66796875" x="993.482421875"/>
  </node>
  <node id="73999" label="1011000011" cy:nodeId="38587">
    <graphics z="0.0" y="-656.66796875" x="1144.482421875"/>
  </node>
  <node id="73998" label="1011000001" cy:nodeId="38588">
    <graphics z="0.0" y="-1087.66796875" x="1223.482421875"/>
  </node>
  <node id="73997" label="0111110010" cy:nodeId="38589">
    <graphics z="0.0" y="479.33203125" x="372.482421875"/>
  </node>
  <node id="73996" label="0011001100" cy:nodeId="38590">
    <graphics z="0.0" y="975.33203125" x="924.482421875"/>
  </node>
  <node id="73995" label="0001001110" cy:nodeId="38591">
    <graphics z="0.0" y="1308.33203125" x="998.482421875"/>
  </node>
  <node id="73994" label="0011000101" cy:nodeId="38592">
    <graphics z="0.0" y="-873.66796875" x="-647.517578125"/>
  </node>
  <node id="73993" label="0011000011" cy:nodeId="38593">
    <graphics z="0.0" y="-1055.66796875" x="-254.517578125"/>
  </node>
  <node id="73992" label="0011000001" cy:nodeId="38594">
    <graphics z="0.0" y="-974.66796875" x="-250.517578125"/>
  </node>
  <node id="73991" label="1011001100" cy:nodeId="38595">
    <graphics z="0.0" y="1004.33203125" x="-677.517578125"/>
  </node>
  <node id="73990" label="1001001110" cy:nodeId="38596">
    <graphics z="0.0" y="1146.33203125" x="-943.517578125"/>
  </node>
  <node id="73989" label="1111110010" cy:nodeId="38597">
    <graphics z="0.0" y="501.33203125" x="-1266.517578125"/>
  </node>
  <node id="73988" label="0011110010" cy:nodeId="38598">
    <graphics z="0.0" y="487.33203125" x="170.482421875"/>
  </node>
  <node id="73987" label="1011110010" cy:nodeId="38599">
    <graphics z="0.0" y="403.33203125" x="-1391.517578125"/>
  </node>
  <node id="73986" label="0101100001" cy:nodeId="38600">
    <graphics z="0.0" y="-745.66796875" x="-477.517578125"/>
  </node>
  <node id="73985" label="0101000101" cy:nodeId="38601">
    <graphics z="0.0" y="-1030.66796875" x="-757.517578125"/>
  </node>
  <node id="73984" label="0101000011" cy:nodeId="38602">
    <graphics z="0.0" y="-1079.66796875" x="-403.517578125"/>
  </node>
  <node id="73983" label="1101100001" cy:nodeId="38603">
    <graphics z="0.0" y="-804.66796875" x="1051.482421875"/>
  </node>
  <node id="73982" label="1101000101" cy:nodeId="38604">
    <graphics z="0.0" y="-1077.66796875" x="636.482421875"/>
  </node>
  <node id="73981" label="1101000011" cy:nodeId="38605">
    <graphics z="0.0" y="-840.66796875" x="1013.482421875"/>
  </node>
  <node id="73980" label="0111111100" cy:nodeId="38606">
    <graphics z="0.0" y="930.33203125" x="764.482421875"/>
  </node>
  <node id="73979" label="1111111100" cy:nodeId="38607">
    <graphics z="0.0" y="1182.33203125" x="-684.517578125"/>
  </node>
  <node id="73978" label="0101110010" cy:nodeId="38608">
    <graphics z="0.0" y="607.33203125" x="408.482421875"/>
  </node>
  <node id="73977" label="1110001110" cy:nodeId="38609">
    <graphics z="0.0" y="1164.33203125" x="-608.517578125"/>
  </node>
  <node id="73976" label="0110001110" cy:nodeId="38610">
    <graphics z="0.0" y="1167.33203125" x="1253.482421875"/>
  </node>
  <node id="73975" label="0110001100" cy:nodeId="38611">
    <graphics z="0.0" y="927.33203125" x="1327.482421875"/>
  </node>
  <node id="73974" label="1001000101" cy:nodeId="38612">
    <graphics z="0.0" y="-1331.66796875" x="643.482421875"/>
  </node>
  <node id="73973" label="1001000011" cy:nodeId="38613">
    <graphics z="0.0" y="-1156.66796875" x="875.482421875"/>
  </node>
  <node id="73972" label="0001000101" cy:nodeId="38614">
    <graphics z="0.0" y="-1164.66796875" x="-887.517578125"/>
  </node>
  <node id="73971" label="0001000011" cy:nodeId="38615">
    <graphics z="0.0" y="-1292.66796875" x="-554.517578125"/>
  </node>
  <node id="73970" label="1011111100" cy:nodeId="38616">
    <graphics z="0.0" y="972.33203125" x="-950.517578125"/>
  </node>
  <node id="73969" label="1101110010" cy:nodeId="38617">
    <graphics z="0.0" y="507.33203125" x="-1082.517578125"/>
  </node>
  <node id="73968" label="0011111100" cy:nodeId="38618">
    <graphics z="0.0" y="720.33203125" x="492.482421875"/>
  </node>
  <node id="73967" label="0011100010" cy:nodeId="38619">
    <graphics z="0.0" y="797.33203125" x="90.482421875"/>
  </node>
  <node id="73966" label="0001110010" cy:nodeId="38620">
    <graphics z="0.0" y="609.33203125" x="306.482421875"/>
  </node>
  <node id="73965" label="0010001110" cy:nodeId="38621">
    <graphics z="0.0" y="1253.33203125" x="1010.482421875"/>
  </node>
  <node id="73964" label="1110001100" cy:nodeId="38622">
    <graphics z="0.0" y="1097.33203125" x="-241.517578125"/>
  </node>
  <node id="73963" label="1010001110" cy:nodeId="38623">
    <graphics z="0.0" y="1181.33203125" x="-760.517578125"/>
  </node>
  <node id="73962" label="1011100010" cy:nodeId="38624">
    <graphics z="0.0" y="634.33203125" x="-1339.517578125"/>
  </node>
  <node id="73961" label="1001110010" cy:nodeId="38625">
    <graphics z="0.0" y="344.33203125" x="-1268.517578125"/>
  </node>
  <node id="73960" label="1111010110" cy:nodeId="38626">
    <graphics z="0.0" y="522.33203125" x="-901.517578125"/>
  </node>
  <node id="73959" label="1111010100" cy:nodeId="38627">
    <graphics z="0.0" y="383.33203125" x="-624.517578125"/>
  </node>
  <node id="73958" label="0111010110" cy:nodeId="38628">
    <graphics z="0.0" y="491.33203125" x="682.482421875"/>
  </node>
  <node id="73957" label="0111010100" cy:nodeId="38629">
    <graphics z="0.0" y="327.33203125" x="917.482421875"/>
  </node>
  <node id="73956" label="1011010110" cy:nodeId="38630">
    <graphics z="0.0" y="427.33203125" x="-1136.517578125"/>
  </node>
  <node id="73955" label="0011010110" cy:nodeId="38631">
    <graphics z="0.0" y="736.33203125" x="665.482421875"/>
  </node>
  <node id="73954" label="0101111100" cy:nodeId="38632">
    <graphics z="0.0" y="995.33203125" x="1152.482421875"/>
  </node>
  <node id="73953" label="1101111100" cy:nodeId="38633">
    <graphics z="0.0" y="1040.33203125" x="-608.517578125"/>
  </node>
  <node id="73952" label="0110000101" cy:nodeId="38634">
    <graphics z="0.0" y="-1103.66796875" x="-664.517578125"/>
  </node>
  <node id="73951" label="0110000011" cy:nodeId="38635">
    <graphics z="0.0" y="-1208.66796875" x="-300.517578125"/>
  </node>
  <node id="73950" label="0110000001" cy:nodeId="38636">
    <graphics z="0.0" y="-1131.66796875" x="-294.517578125"/>
  </node>
  <node id="73949" label="1110000101" cy:nodeId="38637">
    <graphics z="0.0" y="-1163.66796875" x="756.482421875"/>
  </node>
  <node id="73948" label="1110000011" cy:nodeId="38638">
    <graphics z="0.0" y="-768.66796875" x="1104.482421875"/>
  </node>
  <node id="73947" label="0101001100" cy:nodeId="38639">
    <graphics z="0.0" y="1085.33203125" x="1348.482421875"/>
  </node>
  <node id="73946" label="0100001110" cy:nodeId="38640">
    <graphics z="0.0" y="1273.33203125" x="1419.482421875"/>
  </node>
  <node id="73945" label="0100001100" cy:nodeId="38641">
    <graphics z="0.0" y="1102.33203125" x="1524.482421875"/>
  </node>
  <node id="73944" label="0001111100" cy:nodeId="38642">
    <graphics z="0.0" y="966.33203125" x="790.482421875"/>
  </node>
  <node id="73943" label="1101001100" cy:nodeId="38643">
    <graphics z="0.0" y="1120.33203125" x="-346.517578125"/>
  </node>
  <node id="73942" label="1100001110" cy:nodeId="38644">
    <graphics z="0.0" y="1156.33203125" x="-365.517578125"/>
  </node>
  <node id="73941" label="1001111100" cy:nodeId="38645">
    <graphics z="0.0" y="1230.33203125" x="-804.517578125"/>
  </node>
  <node id="73940" label="0010000101" cy:nodeId="38646">
    <graphics z="0.0" y="-1124.66796875" x="-818.517578125"/>
  </node>
  <node id="73939" label="0010000011" cy:nodeId="38647">
    <graphics z="0.0" y="-1310.66796875" x="-439.517578125"/>
  </node>
  <node id="73938" label="0010000001" cy:nodeId="38648">
    <graphics z="0.0" y="-1274.66796875" x="-399.517578125"/>
  </node>
  <node id="73937" label="1110000001" cy:nodeId="38649">
    <graphics z="0.0" y="-1153.66796875" x="1098.482421875"/>
  </node>
  <node id="73936" label="1010000101" cy:nodeId="38650">
    <graphics z="0.0" y="-1351.66796875" x="742.482421875"/>
  </node>
  <node id="73935" label="1010000011" cy:nodeId="38651">
    <graphics z="0.0" y="-1080.66796875" x="994.482421875"/>
  </node>
  <node id="73934" label="1010000001" cy:nodeId="38652">
    <graphics z="0.0" y="-1348.66796875" x="1075.482421875"/>
  </node>
  <node id="73933" label="0110110010" cy:nodeId="38653">
    <graphics z="0.0" y="323.33203125" x="480.482421875"/>
  </node>
  <node id="73932" label="0110100010" cy:nodeId="38654">
    <graphics z="0.0" y="756.33203125" x="517.482421875"/>
  </node>
  <node id="73931" label="0010001100" cy:nodeId="38655">
    <graphics z="0.0" y="999.33203125" x="1315.482421875"/>
  </node>
  <node id="73930" label="0001001100" cy:nodeId="38656">
    <graphics z="0.0" y="1121.33203125" x="1279.482421875"/>
  </node>
  <node id="73929" label="0000001110" cy:nodeId="38657">
    <graphics z="0.0" y="1304.33203125" x="1277.482421875"/>
  </node>
  <node id="73928" label="0000001100" cy:nodeId="38658">
    <graphics z="0.0" y="1049.33203125" x="1411.482421875"/>
  </node>
  <node id="73927" label="1100001100" cy:nodeId="38659">
    <graphics z="0.0" y="1025.33203125" x="-45.517578125"/>
  </node>
  <node id="73926" label="1010001100" cy:nodeId="38660">
    <graphics z="0.0" y="1087.33203125" x="-461.517578125"/>
  </node>
  <node id="73925" label="1001001100" cy:nodeId="38661">
    <graphics z="0.0" y="1123.33203125" x="-509.517578125"/>
  </node>
  <node id="73924" label="1000001110" cy:nodeId="38662">
    <graphics z="0.0" y="1205.33203125" x="-448.517578125"/>
  </node>
  <node id="73923" label="1000001100" cy:nodeId="38663">
    <graphics z="0.0" y="925.33203125" x="-165.517578125"/>
  </node>
  <node id="73922" label="1110110010" cy:nodeId="38664">
    <graphics z="0.0" y="485.33203125" x="-839.517578125"/>
  </node>
  <node id="73921" label="1101010110" cy:nodeId="38665">
    <graphics z="0.0" y="629.33203125" x="-740.517578125"/>
  </node>
  <node id="73920" label="0101010110" cy:nodeId="38666">
    <graphics z="0.0" y="795.33203125" x="904.482421875"/>
  </node>
  <node id="73919" label="0010110010" cy:nodeId="38667">
    <graphics z="0.0" y="515.33203125" x="359.482421875"/>
  </node>
  <node id="73918" label="1110100010" cy:nodeId="38668">
    <graphics z="0.0" y="748.33203125" x="-958.517578125"/>
  </node>
  <node id="73917" label="1010110010" cy:nodeId="38669">
    <graphics z="0.0" y="319.33203125" x="-1049.517578125"/>
  </node>
  <node id="73916" label="1011010100" cy:nodeId="38670">
    <graphics z="0.0" y="239.33203125" x="-836.517578125"/>
  </node>
  <node id="73915" label="1001010110" cy:nodeId="38671">
    <graphics z="0.0" y="361.33203125" x="-1008.517578125"/>
  </node>
  <node id="73914" label="0011010100" cy:nodeId="38672">
    <graphics z="0.0" y="253.33203125" x="785.482421875"/>
  </node>
  <node id="73913" label="0001010110" cy:nodeId="38673">
    <graphics z="0.0" y="705.33203125" x="912.482421875"/>
  </node>
  <node id="73912" label="0101000001" cy:nodeId="38674">
    <graphics z="0.0" y="-1118.66796875" x="-463.517578125"/>
  </node>
  <node id="73911" label="0100000101" cy:nodeId="38675">
    <graphics z="0.0" y="-1267.66796875" x="-995.517578125"/>
  </node>
  <node id="73910" label="0100000011" cy:nodeId="38676">
    <graphics z="0.0" y="-1406.66796875" x="-655.517578125"/>
  </node>
  <node id="73909" label="0100000001" cy:nodeId="38677">
    <graphics z="0.0" y="-1370.66796875" x="-613.517578125"/>
  </node>
  <node id="73908" label="1101000001" cy:nodeId="38678">
    <graphics z="0.0" y="-1117.66796875" x="1095.482421875"/>
  </node>
  <node id="73907" label="1100000101" cy:nodeId="38679">
    <graphics z="0.0" y="-1294.66796875" x="464.482421875"/>
  </node>
  <node id="73906" label="1100000011" cy:nodeId="38680">
    <graphics z="0.0" y="-1042.66796875" x="744.482421875"/>
  </node>
  <node id="73905" label="0110111100" cy:nodeId="38681">
    <graphics z="0.0" y="795.33203125" x="1102.482421875"/>
  </node>
  <node id="73904" label="1110111100" cy:nodeId="38682">
    <graphics z="0.0" y="983.33203125" x="-273.517578125"/>
  </node>
  <node id="73903" label="1100000001" cy:nodeId="38683">
    <graphics z="0.0" y="-1277.66796875" x="879.482421875"/>
  </node>
  <node id="73902" label="1001000001" cy:nodeId="38684">
    <graphics z="0.0" y="-1352.66796875" x="932.482421875"/>
  </node>
  <node id="73901" label="1000000101" cy:nodeId="38685">
    <graphics z="0.0" y="-1481.66796875" x="476.482421875"/>
  </node>
  <node id="73900" label="1000000011" cy:nodeId="38686">
    <graphics z="0.0" y="-1295.66796875" x="611.482421875"/>
  </node>
  <node id="73899" label="1000000001" cy:nodeId="38687">
    <graphics z="0.0" y="-1492.66796875" x="768.482421875"/>
  </node>
  <node id="73898" label="0001000001" cy:nodeId="38688">
    <graphics z="0.0" y="-1154.66796875" x="-454.517578125"/>
  </node>
  <node id="73897" label="0000000101" cy:nodeId="38689">
    <graphics z="0.0" y="-1236.66796875" x="-1152.517578125"/>
  </node>
  <node id="73896" label="0000000011" cy:nodeId="38690">
    <graphics z="0.0" y="-1492.66796875" x="-746.517578125"/>
  </node>
  <node id="73895" label="0000000001" cy:nodeId="38691">
    <graphics z="0.0" y="-1409.66796875" x="-766.517578125"/>
  </node>
  <node id="73894" label="0100110010" cy:nodeId="38692">
    <graphics z="0.0" y="455.33203125" x="724.482421875"/>
  </node>
  <node id="73893" label="0100100010" cy:nodeId="38693">
    <graphics z="0.0" y="921.33203125" x="688.482421875"/>
  </node>
  <node id="73892" label="0010111100" cy:nodeId="38694">
    <graphics z="0.0" y="789.33203125" x="827.482421875"/>
  </node>
  <node id="73891" label="1100110010" cy:nodeId="38695">
    <graphics z="0.0" y="413.33203125" x="-773.517578125"/>
  </node>
  <node id="73890" label="1010111100" cy:nodeId="38696">
    <graphics z="0.0" y="995.33203125" x="-572.517578125"/>
  </node>
  <node id="73889" label="0010100010" cy:nodeId="38697">
    <graphics z="0.0" y="835.33203125" x="257.482421875"/>
  </node>
  <node id="73888" label="0001100010" cy:nodeId="38698">
    <graphics z="0.0" y="905.33203125" x="284.482421875"/>
  </node>
  <node id="73887" label="0000110010" cy:nodeId="38699">
    <graphics z="0.0" y="568.33203125" x="556.482421875"/>
  </node>
  <node id="73886" label="0000100010" cy:nodeId="38700">
    <graphics z="0.0" y="937.33203125" x="433.482421875"/>
  </node>
  <node id="73885" label="1100100010" cy:nodeId="38701">
    <graphics z="0.0" y="701.33203125" x="-749.517578125"/>
  </node>
  <node id="73884" label="1010100010" cy:nodeId="38702">
    <graphics z="0.0" y="640.33203125" x="-1009.517578125"/>
  </node>
  <node id="73883" label="1001100010" cy:nodeId="38703">
    <graphics z="0.0" y="598.33203125" x="-1317.517578125"/>
  </node>
  <node id="73882" label="1000110010" cy:nodeId="38704">
    <graphics z="0.0" y="306.33203125" x="-858.517578125"/>
  </node>
  <node id="73881" label="1000100010" cy:nodeId="38705">
    <graphics z="0.0" y="450.33203125" x="-988.517578125"/>
  </node>
  <node id="73880" label="1110010110" cy:nodeId="38706">
    <graphics z="0.0" y="625.33203125" x="-537.517578125"/>
  </node>
  <node id="73879" label="1110010100" cy:nodeId="38707">
    <graphics z="0.0" y="492.33203125" x="-264.517578125"/>
  </node>
  <node id="73878" label="0110010110" cy:nodeId="38708">
    <graphics z="0.0" y="635.33203125" x="1014.482421875"/>
  </node>
  <node id="73877" label="0110010100" cy:nodeId="38709">
    <graphics z="0.0" y="350.33203125" x="1170.482421875"/>
  </node>
  <node id="73876" label="0111110100" cy:nodeId="38710">
    <graphics z="0.0" y="457.33203125" x="468.482421875"/>
  </node>
  <node id="73875" label="1111110100" cy:nodeId="38711">
    <graphics z="0.0" y="846.33203125" x="-903.517578125"/>
  </node>
  <node id="73874" label="1010010110" cy:nodeId="38712">
    <graphics z="0.0" y="377.33203125" x="-754.517578125"/>
  </node>
  <node id="73873" label="0010010110" cy:nodeId="38713">
    <graphics z="0.0" y="471.33203125" x="847.482421875"/>
  </node>
  <node id="73872" label="0100111100" cy:nodeId="38714">
    <graphics z="0.0" y="866.33203125" x="1219.482421875"/>
  </node>
  <node id="73871" label="0111100010" cy:nodeId="38715">
    <graphics z="0.0" y="740.33203125" x="247.482421875"/>
  </node>
  <node id="73870" label="0011110100" cy:nodeId="38716">
    <graphics z="0.0" y="432.33203125" x="356.482421875"/>
  </node>
  <node id="73869" label="1011110100" cy:nodeId="38717">
    <graphics z="0.0" y="543.33203125" x="-1136.517578125"/>
  </node>
  <node id="73868" label="1100111100" cy:nodeId="38718">
    <graphics z="0.0" y="1009.33203125" x="-190.517578125"/>
  </node>
  <node id="73867" label="1111100010" cy:nodeId="38719">
    <graphics z="0.0" y="815.33203125" x="-1314.517578125"/>
  </node>
  <node id="73866" label="0000111100" cy:nodeId="38720">
    <graphics z="0.0" y="902.33203125" x="1225.482421875"/>
  </node>
  <node id="73865" label="1000111100" cy:nodeId="38721">
    <graphics z="0.0" y="917.33203125" x="-385.517578125"/>
  </node>
  <node id="73864" label="1101010100" cy:nodeId="38722">
    <graphics z="0.0" y="360.33203125" x="-423.517578125"/>
  </node>
  <node id="73863" label="1100010110" cy:nodeId="38723">
    <graphics z="0.0" y="466.33203125" x="-366.517578125"/>
  </node>
  <node id="73862" label="1100010100" cy:nodeId="38724">
    <graphics z="0.0" y="401.33203125" x="-89.517578125"/>
  </node>
  <node id="73861" label="0101010100" cy:nodeId="38725">
    <graphics z="0.0" y="451.33203125" x="1121.482421875"/>
  </node>
  <node id="73860" label="0100010110" cy:nodeId="38726">
    <graphics z="0.0" y="761.33203125" x="1187.482421875"/>
  </node>
  <node id="73859" label="0100010100" cy:nodeId="38727">
    <graphics z="0.0" y="490.33203125" x="1421.482421875"/>
  </node>
  <node id="73858" label="1111011100" cy:nodeId="38728">
    <graphics z="0.0" y="851.33203125" x="-532.517578125"/>
  </node>
  <node id="73857" label="1111011010" cy:nodeId="38729">
    <graphics z="0.0" y="543.33203125" x="-1053.517578125"/>
  </node>
  <node id="73856" label="0111011100" cy:nodeId="38730">
    <graphics z="0.0" y="471.33203125" x="1207.482421875"/>
  </node>
  <node id="73855" label="0111011010" cy:nodeId="38731">
    <graphics z="0.0" y="399.33203125" x="854.482421875"/>
  </node>
  <node id="73854" label="0101110100" cy:nodeId="38732">
    <graphics z="0.0" y="554.33203125" x="637.482421875"/>
  </node>
  <node id="73853" label="1101110100" cy:nodeId="38733">
    <graphics z="0.0" y="593.33203125" x="-767.517578125"/>
  </node>
  <node id="73852" label="1010010100" cy:nodeId="38734">
    <graphics z="0.0" y="396.33203125" x="-482.517578125"/>
  </node>
  <node id="73851" label="1001010100" cy:nodeId="38735">
    <graphics z="0.0" y="271.33203125" x="-581.517578125"/>
  </node>
  <node id="73850" label="1000010110" cy:nodeId="38736">
    <graphics z="0.0" y="311.33203125" x="-550.517578125"/>
  </node>
  <node id="73849" label="1000010100" cy:nodeId="38737">
    <graphics z="0.0" y="327.33203125" x="-272.517578125"/>
  </node>
  <node id="73848" label="0010010100" cy:nodeId="38738">
    <graphics z="0.0" y="278.33203125" x="1014.482421875"/>
  </node>
  <node id="73847" label="0001010100" cy:nodeId="38739">
    <graphics z="0.0" y="435.33203125" x="908.482421875"/>
  </node>
  <node id="73846" label="0000010110" cy:nodeId="38740">
    <graphics z="0.0" y="615.33203125" x="1163.482421875"/>
  </node>
  <node id="73845" label="0000010100" cy:nodeId="38741">
    <graphics z="0.0" y="431.33203125" x="1273.482421875"/>
  </node>
  <node id="73844" label="0011011100" cy:nodeId="38742">
    <graphics z="0.0" y="561.33203125" x="959.482421875"/>
  </node>
  <node id="73843" label="0011011010" cy:nodeId="38743">
    <graphics z="0.0" y="626.33203125" x="697.482421875"/>
  </node>
  <node id="73842" label="0001110100" cy:nodeId="38744">
    <graphics z="0.0" y="664.33203125" x="595.482421875"/>
  </node>
  <node id="73841" label="0101100010" cy:nodeId="38745">
    <graphics z="0.0" y="901.33203125" x="416.482421875"/>
  </node>
  <node id="73840" label="1011011100" cy:nodeId="38746">
    <graphics z="0.0" y="665.33203125" x="-771.517578125"/>
  </node>
  <node id="73839" label="1011011010" cy:nodeId="38747">
    <graphics z="0.0" y="463.33203125" x="-1148.517578125"/>
  </node>
  <node id="73838" label="1001110100" cy:nodeId="38748">
    <graphics z="0.0" y="630.33203125" x="-892.517578125"/>
  </node>
  <node id="73837" label="1101100010" cy:nodeId="38749">
    <graphics z="0.0" y="846.33203125" x="-1136.517578125"/>
  </node>
  <node id="73836" label="0101011100" cy:nodeId="38750">
    <graphics z="0.0" y="686.33203125" x="1441.482421875"/>
  </node>
  <node id="73835" label="0101011010" cy:nodeId="38751">
    <graphics z="0.0" y="525.33203125" x="1105.482421875"/>
  </node>
  <node id="73834" label="1101011100" cy:nodeId="38752">
    <graphics z="0.0" y="703.33203125" x="-338.517578125"/>
  </node>
  <node id="73833" label="1101011010" cy:nodeId="38753">
    <graphics z="0.0" y="557.33203125" x="-772.517578125"/>
  </node>
  <node id="73832" label="0110110100" cy:nodeId="38754">
    <graphics z="0.0" y="543.33203125" x="826.482421875"/>
  </node>
  <node id="73831" label="0001011100" cy:nodeId="38755">
    <graphics z="0.0" y="774.33203125" x="1263.482421875"/>
  </node>
  <node id="73830" label="0001011010" cy:nodeId="38756">
    <graphics z="0.0" y="707.33203125" x="994.482421875"/>
  </node>
  <node id="73829" label="1110110100" cy:nodeId="38757">
    <graphics z="0.0" y="511.33203125" x="-505.517578125"/>
  </node>
  <node id="73828" label="1001011100" cy:nodeId="38758">
    <graphics z="0.0" y="887.33203125" x="-503.517578125"/>
  </node>
  <node id="73827" label="1001011010" cy:nodeId="38759">
    <graphics z="0.0" y="550.33203125" x="-977.517578125"/>
  </node>
  <node id="73826" label="0010110100" cy:nodeId="38760">
    <graphics z="0.0" y="552.33203125" x="713.482421875"/>
  </node>
  <node id="73825" label="1010110100" cy:nodeId="38761">
    <graphics z="0.0" y="521.33203125" x="-772.517578125"/>
  </node>
  <node id="73824" label="0100110100" cy:nodeId="38762">
    <graphics z="0.0" y="597.33203125" x="1049.482421875"/>
  </node>
  <node id="73823" label="0110011100" cy:nodeId="38763">
    <graphics z="0.0" y="614.33203125" x="1424.482421875"/>
  </node>
  <node id="73822" label="0110011010" cy:nodeId="38764">
    <graphics z="0.0" y="386.33203125" x="1185.482421875"/>
  </node>
  <node id="73821" label="1100110100" cy:nodeId="38765">
    <graphics z="0.0" y="672.33203125" x="-186.517578125"/>
  </node>
  <node id="73820" label="1110011100" cy:nodeId="38766">
    <graphics z="0.0" y="761.33203125" x="-190.517578125"/>
  </node>
  <node id="73819" label="1110011010" cy:nodeId="38767">
    <graphics z="0.0" y="435.33203125" x="-546.517578125"/>
  </node>
  <node id="73818" label="0000110100" cy:nodeId="38768">
    <graphics z="0.0" y="671.33203125" x="988.482421875"/>
  </node>
  <node id="73817" label="0010011100" cy:nodeId="38769">
    <graphics z="0.0" y="594.33203125" x="1313.482421875"/>
  </node>
  <node id="73816" label="0010011010" cy:nodeId="38770">
    <graphics z="0.0" y="441.33203125" x="984.482421875"/>
  </node>
  <node id="73815" label="1010011100" cy:nodeId="38771">
    <graphics z="0.0" y="776.33203125" x="-402.517578125"/>
  </node>
  <node id="73814" label="1010011010" cy:nodeId="38772">
    <graphics z="0.0" y="449.33203125" x="-811.517578125"/>
  </node>
  <node id="73813" label="1000110100" cy:nodeId="38773">
    <graphics z="0.0" y="547.33203125" x="-483.517578125"/>
  </node>
  <node id="73812" label="0111100100" cy:nodeId="38774">
    <graphics z="0.0" y="886.33203125" x="612.482421875"/>
  </node>
  <node id="73811" label="0111000110" cy:nodeId="38775">
    <graphics z="0.0" y="880.33203125" x="690.482421875"/>
  </node>
  <node id="73810" label="0111000100" cy:nodeId="38776">
    <graphics z="0.0" y="597.33203125" x="932.482421875"/>
  </node>
  <node id="73809" label="1111100100" cy:nodeId="38777">
    <graphics z="0.0" y="1050.33203125" x="-892.517578125"/>
  </node>
  <node id="73808" label="1111000110" cy:nodeId="38778">
    <graphics z="0.0" y="931.33203125" x="-1055.517578125"/>
  </node>
  <node id="73807" label="0100011100" cy:nodeId="38779">
    <graphics z="0.0" y="769.33203125" x="1564.482421875"/>
  </node>
  <node id="73806" label="0100011010" cy:nodeId="38780">
    <graphics z="0.0" y="650.33203125" x="1441.482421875"/>
  </node>
  <node id="73805" label="0011100100" cy:nodeId="38781">
    <graphics z="0.0" y="800.33203125" x="372.482421875"/>
  </node>
  <node id="73804" label="0011000110" cy:nodeId="38782">
    <graphics z="0.0" y="922.33203125" x="604.482421875"/>
  </node>
  <node id="73803" label="1100011100" cy:nodeId="38783">
    <graphics z="0.0" y="750.33203125" x="-30.517578125"/>
  </node>
  <node id="73802" label="1100011010" cy:nodeId="38784">
    <graphics z="0.0" y="630.33203125" x="-441.517578125"/>
  </node>
  <node id="73801" label="1111000100" cy:nodeId="38785">
    <graphics z="0.0" y="797.33203125" x="-670.517578125"/>
  </node>
  <node id="73800" label="1011100100" cy:nodeId="38786">
    <graphics z="0.0" y="943.33203125" x="-1170.517578125"/>
  </node>
  <node id="73799" label="1011000110" cy:nodeId="38787">
    <graphics z="0.0" y="734.33203125" x="-1265.517578125"/>
  </node>
  <node id="73798" label="1011101000" cy:nodeId="38788">
    <graphics z="0.0" y="1058.33203125" x="-1039.517578125"/>
  </node>
  <node id="73797" label="0011101000" cy:nodeId="38789">
    <graphics z="0.0" y="901.33203125" x="492.482421875"/>
  </node>
  <node id="73796" label="0000011100" cy:nodeId="38790">
    <graphics z="0.0" y="722.33203125" x="1377.482421875"/>
  </node>
  <node id="73795" label="0000011010" cy:nodeId="38791">
    <graphics z="0.0" y="579.33203125" x="1181.482421875"/>
  </node>
  <node id="73794" label="1000011100" cy:nodeId="38792">
    <graphics z="0.0" y="636.33203125" x="-201.517578125"/>
  </node>
  <node id="73793" label="1000011010" cy:nodeId="38793">
    <graphics z="0.0" y="547.33203125" x="-559.517578125"/>
  </node>
  <node id="73792" label="0101100100" cy:nodeId="38794">
    <graphics z="0.0" y="1074.33203125" x="681.482421875"/>
  </node>
  <node id="73791" label="0101000110" cy:nodeId="38795">
    <graphics z="0.0" y="1191.33203125" x="874.482421875"/>
  </node>
  <node id="73790" label="1101100100" cy:nodeId="38796">
    <graphics z="0.0" y="887.33203125" x="-582.517578125"/>
  </node>
  <node id="73789" label="1101000110" cy:nodeId="38797">
    <graphics z="0.0" y="962.33203125" x="-718.517578125"/>
  </node>
  <node id="73788" label="0011000100" cy:nodeId="38798">
    <graphics z="0.0" y="831.33203125" x="926.482421875"/>
  </node>
  <node id="73787" label="0001100100" cy:nodeId="38799">
    <graphics z="0.0" y="1031.33203125" x="529.482421875"/>
  </node>
  <node id="73786" label="0001000110" cy:nodeId="38800">
    <graphics z="0.0" y="1011.33203125" x="954.482421875"/>
  </node>
  <node id="73785" label="1011000100" cy:nodeId="38801">
    <graphics z="0.0" y="666.33203125" x="-892.517578125"/>
  </node>
  <node id="73784" label="1001100100" cy:nodeId="38802">
    <graphics z="0.0" y="918.33203125" x="-892.517578125"/>
  </node>
  <node id="73783" label="1001000110" cy:nodeId="38803">
    <graphics z="0.0" y="676.33203125" x="-1044.517578125"/>
  </node>
  <node id="73782" label="0110101000" cy:nodeId="38804">
    <graphics z="0.0" y="903.33203125" x="1040.482421875"/>
  </node>
  <node id="73781" label="1110101000" cy:nodeId="38805">
    <graphics z="0.0" y="1053.33203125" x="-385.517578125"/>
  </node>
  <node id="73780" label="0111111000" cy:nodeId="38806">
    <graphics z="0.0" y="419.33203125" x="749.482421875"/>
  </node>
  <node id="73779" label="1111111000" cy:nodeId="38807">
    <graphics z="0.0" y="774.33203125" x="-832.517578125"/>
  </node>
  <node id="73778" label="0110100100" cy:nodeId="38808">
    <graphics z="0.0" y="670.33203125" x="729.482421875"/>
  </node>
  <node id="73777" label="0110000110" cy:nodeId="38809">
    <graphics z="0.0" y="995.33203125" x="1076.482421875"/>
  </node>
  <node id="73776" label="0110000100" cy:nodeId="38810">
    <graphics z="0.0" y="687.33203125" x="1134.482421875"/>
  </node>
  <node id="73775" label="0011111000" cy:nodeId="38811">
    <graphics z="0.0" y="460.33203125" x="565.482421875"/>
  </node>
  <node id="73774" label="1110100100" cy:nodeId="38812">
    <graphics z="0.0" y="959.33203125" x="-539.517578125"/>
  </node>
  <node id="73773" label="1110000110" cy:nodeId="38813">
    <graphics z="0.0" y="761.33203125" x="-643.517578125"/>
  </node>
  <node id="73772" label="1011111000" cy:nodeId="38814">
    <graphics z="0.0" y="604.33203125" x="-979.517578125"/>
  </node>
  <node id="73771" label="0100101000" cy:nodeId="38815">
    <graphics z="0.0" y="1018.33203125" x="1236.482421875"/>
  </node>
  <node id="73770" label="0010100100" cy:nodeId="38816">
    <graphics z="0.0" y="959.33203125" x="561.482421875"/>
  </node>
  <node id="73769" label="0010000110" cy:nodeId="38817">
    <graphics z="0.0" y="939.33203125" x="917.482421875"/>
  </node>
  <node id="73768" label="1110000100" cy:nodeId="38818">
    <graphics z="0.0" y="831.33203125" x="-263.517578125"/>
  </node>
  <node id="73767" label="1010100100" cy:nodeId="38819">
    <graphics z="0.0" y="962.33203125" x="-794.517578125"/>
  </node>
  <node id="73766" label="1010000110" cy:nodeId="38820">
    <graphics z="0.0" y="702.33203125" x="-825.517578125"/>
  </node>
  <node id="73765" label="1100101000" cy:nodeId="38821">
    <graphics z="0.0" y="994.33203125" x="-349.517578125"/>
  </node>
  <node id="73764" label="1010101000" cy:nodeId="38822">
    <graphics z="0.0" y="1087.33203125" x="-540.517578125"/>
  </node>
  <node id="73763" label="1001101000" cy:nodeId="38823">
    <graphics z="0.0" y="890.33203125" x="-658.517578125"/>
  </node>
  <node id="73762" label="1000101000" cy:nodeId="38824">
    <graphics z="0.0" y="877.33203125" x="-414.517578125"/>
  </node>
  <node id="73761" label="0010101000" cy:nodeId="38825">
    <graphics z="0.0" y="820.33203125" x="750.482421875"/>
  </node>
  <node id="73760" label="0001101000" cy:nodeId="38826">
    <graphics z="0.0" y="856.33203125" x="773.482421875"/>
  </node>
  <node id="73759" label="0000101000" cy:nodeId="38827">
    <graphics z="0.0" y="939.33203125" x="1046.482421875"/>
  </node>
  <node id="73758" label="0101111000" cy:nodeId="38828">
    <graphics z="0.0" y="525.33203125" x="953.482421875"/>
  </node>
  <node id="73757" label="1101111000" cy:nodeId="38829">
    <graphics z="0.0" y="822.33203125" x="-784.517578125"/>
  </node>
  <node id="73756" label="0111101000" cy:nodeId="38830">
    <graphics z="0.0" y="1002.33203125" x="790.482421875"/>
  </node>
  <node id="73755" label="0111001010" cy:nodeId="38831">
    <graphics z="0.0" y="759.33203125" x="903.482421875"/>
  </node>
  <node id="73754" label="0111001000" cy:nodeId="38832">
    <graphics z="0.0" y="651.33203125" x="1117.482421875"/>
  </node>
  <node id="73753" label="0101000100" cy:nodeId="38833">
    <graphics z="0.0" y="908.33203125" x="1141.482421875"/>
  </node>
  <node id="73752" label="0100100100" cy:nodeId="38834">
    <graphics z="0.0" y="1109.33203125" x="1064.482421875"/>
  </node>
  <node id="73751" label="0100000110" cy:nodeId="38835">
    <graphics z="0.0" y="1185.33203125" x="1177.482421875"/>
  </node>
  <node id="73750" label="0100000100" cy:nodeId="38836">
    <graphics z="0.0" y="855.33203125" x="1375.482421875"/>
  </node>
  <node id="73749" label="0001111000" cy:nodeId="38837">
    <graphics z="0.0" y="579.33203125" x="798.482421875"/>
  </node>
  <node id="73748" label="1111101000" cy:nodeId="38838">
    <graphics z="0.0" y="1145.33203125" x="-780.517578125"/>
  </node>
  <node id="73747" label="1111001010" cy:nodeId="38839">
    <graphics z="0.0" y="810.33203125" x="-867.517578125"/>
  </node>
  <node id="73746" label="1101000100" cy:nodeId="38840">
    <graphics z="0.0" y="740.33203125" x="-420.517578125"/>
  </node>
  <node id="73745" label="1100100100" cy:nodeId="38841">
    <graphics z="0.0" y="873.33203125" x="-327.517578125"/>
  </node>
  <node id="73744" label="1100000110" cy:nodeId="38842">
    <graphics z="0.0" y="785.33203125" x="-282.517578125"/>
  </node>
  <node id="73743" label="1001111000" cy:nodeId="38843">
    <graphics z="0.0" y="712.33203125" x="-901.517578125"/>
  </node>
  <node id="73742" label="0011001010" cy:nodeId="38844">
    <graphics z="0.0" y="792.33203125" x="483.482421875"/>
  </node>
  <node id="73741" label="0011001000" cy:nodeId="38845">
    <graphics z="0.0" y="615.33203125" x="834.482421875"/>
  </node>
  <node id="73740" label="0010000100" cy:nodeId="38846">
    <graphics z="0.0" y="723.33203125" x="1070.482421875"/>
  </node>
  <node id="73739" label="0001000100" cy:nodeId="38847">
    <graphics z="0.0" y="903.33203125" x="920.482421875"/>
  </node>
  <node id="73738" label="0000100100" cy:nodeId="38848">
    <graphics z="0.0" y="894.33203125" x="843.482421875"/>
  </node>
  <node id="73737" label="0000000110" cy:nodeId="38849">
    <graphics z="0.0" y="1031.33203125" x="1093.482421875"/>
  </node>
  <node id="73736" label="0000000100" cy:nodeId="38850">
    <graphics z="0.0" y="725.33203125" x="1211.482421875"/>
  </node>
  <node id="73735" label="1111001000" cy:nodeId="38851">
    <graphics z="0.0" y="815.33203125" x="-556.517578125"/>
  </node>
  <node id="73734" label="1011001010" cy:nodeId="38852">
    <graphics z="0.0" y="774.33203125" x="-1137.517578125"/>
  </node>
  <node id="73733" label="1011001000" cy:nodeId="38853">
    <graphics z="0.0" y="725.33203125" x="-670.517578125"/>
  </node>
  <node id="73732" label="1100000100" cy:nodeId="38854">
    <graphics z="0.0" y="671.33203125" x="-51.517578125"/>
  </node>
  <node id="73731" label="1010000100" cy:nodeId="38855">
    <graphics z="0.0" y="622.33203125" x="-333.517578125"/>
  </node>
  <node id="73730" label="1001000100" cy:nodeId="38856">
    <graphics z="0.0" y="599.33203125" x="-664.517578125"/>
  </node>
  <node id="73729" label="1000100100" cy:nodeId="38857">
    <graphics z="0.0" y="837.33203125" x="-387.517578125"/>
  </node>
  <node id="73728" label="1000000110" cy:nodeId="38858">
    <graphics z="0.0" y="563.33203125" x="-650.517578125"/>
  </node>
  <node id="73727" label="1000000100" cy:nodeId="38859">
    <graphics z="0.0" y="554.33203125" x="-314.517578125"/>
  </node>
  <node id="73726" label="0101101000" cy:nodeId="38860">
    <graphics z="0.0" y="1119.33203125" x="988.482421875"/>
  </node>
  <node id="73725" label="0101001010" cy:nodeId="38861">
    <graphics z="0.0" y="1059.33203125" x="1201.482421875"/>
  </node>
  <node id="73724" label="0110111000" cy:nodeId="38862">
    <graphics z="0.0" y="489.33203125" x="946.482421875"/>
  </node>
  <node id="73723" label="1101101000" cy:nodeId="38863">
    <graphics z="0.0" y="1182.33203125" x="-532.517578125"/>
  </node>
  <node id="73722" label="1101001010" cy:nodeId="38864">
    <graphics z="0.0" y="998.33203125" x="-754.517578125"/>
  </node>
  <node id="73721" label="1110111000" cy:nodeId="38865">
    <graphics z="0.0" y="594.33203125" x="-427.517578125"/>
  </node>
  <node id="73720" label="0010111000" cy:nodeId="38866">
    <graphics z="0.0" y="191.33203125" x="856.482421875"/>
  </node>
  <node id="73719" label="0001001010" cy:nodeId="38867">
    <graphics z="0.0" y="1011.33203125" x="869.482421875"/>
  </node>
  <node id="73718" label="1001001010" cy:nodeId="38868">
    <graphics z="0.0" y="856.33203125" x="-1010.517578125"/>
  </node>
  <node id="73717" label="1010111000" cy:nodeId="38869">
    <graphics z="0.0" y="635.33203125" x="-614.517578125"/>
  </node>
  <node id="73716" label="0100111000" cy:nodeId="38870">
    <graphics z="0.0" y="543.33203125" x="1191.482421875"/>
  </node>
  <node id="73715" label="1100111000" cy:nodeId="38871">
    <graphics z="0.0" y="739.33203125" x="-315.517578125"/>
  </node>
  <node id="73714" label="0110001010" cy:nodeId="38872">
    <graphics z="0.0" y="951.33203125" x="1181.482421875"/>
  </node>
  <node id="73713" label="0110001000" cy:nodeId="38873">
    <graphics z="0.0" y="636.33203125" x="1307.482421875"/>
  </node>
  <node id="73712" label="0000111000" cy:nodeId="38874">
    <graphics z="0.0" y="524.33203125" x="1029.482421875"/>
  </node>
  <node id="73711" label="1110001010" cy:nodeId="38875">
    <graphics z="0.0" y="956.33203125" x="-455.517578125"/>
  </node>
  <node id="73710" label="1000111000" cy:nodeId="38876">
    <graphics z="0.0" y="690.33203125" x="-429.517578125"/>
  </node>
  <node id="73709" label="0010001010" cy:nodeId="38877">
    <graphics z="0.0" y="813.33203125" x="1007.482421875"/>
  </node>
  <node id="73708" label="0010001000" cy:nodeId="38878">
    <graphics z="0.0" y="507.33203125" x="1184.482421875"/>
  </node>
  <node id="73707" label="1110001000" cy:nodeId="38879">
    <graphics z="0.0" y="804.33203125" x="-143.517578125"/>
  </node>
  <node id="73706" label="1010001010" cy:nodeId="38880">
    <graphics z="0.0" y="893.33203125" x="-814.517578125"/>
  </node>
  <node id="73705" label="1010001000" cy:nodeId="38881">
    <graphics z="0.0" y="667.33203125" x="-297.517578125"/>
  </node>
  <node id="73704" label="1111011000" cy:nodeId="38882">
    <graphics z="0.0" y="419.33203125" x="-686.517578125"/>
  </node>
  <node id="73703" label="1111010010" cy:nodeId="38883">
    <graphics z="0.0" y="277.33203125" x="-1059.517578125"/>
  </node>
  <node id="73702" label="1111010000" cy:nodeId="38884">
    <graphics z="0.0" y="179.33203125" x="-697.517578125"/>
  </node>
  <node id="73701" label="0111011000" cy:nodeId="38885">
    <graphics z="0.0" y="240.33203125" x="1083.482421875"/>
  </node>
  <node id="73700" label="0111010010" cy:nodeId="38886">
    <graphics z="0.0" y="338.33203125" x="784.482421875"/>
  </node>
  <node id="73699" label="0111010000" cy:nodeId="38887">
    <graphics z="0.0" y="93.33203125" x="812.482421875"/>
  </node>
  <node id="73698" label="0011011000" cy:nodeId="38888">
    <graphics z="0.0" y="227.33203125" x="861.482421875"/>
  </node>
  <node id="73697" label="0011010010" cy:nodeId="38889">
    <graphics z="0.0" y="395.33203125" x="485.482421875"/>
  </node>
  <node id="73696" label="0011010000" cy:nodeId="38890">
    <graphics z="0.0" y="101.33203125" x="612.482421875"/>
  </node>
  <node id="73695" label="1011011000" cy:nodeId="38891">
    <graphics z="0.0" y="318.33203125" x="-775.517578125"/>
  </node>
  <node id="73694" label="1011010010" cy:nodeId="38892">
    <graphics z="0.0" y="150.33203125" x="-1218.517578125"/>
  </node>
  <node id="73693" label="1011010000" cy:nodeId="38893">
    <graphics z="0.0" y="82.33203125" x="-895.517578125"/>
  </node>
  <node id="73692" label="0101001000" cy:nodeId="38894">
    <graphics z="0.0" y="816.33203125" x="1407.482421875"/>
  </node>
</graph>
