# Supplementary material
Source: publisher figshare collection journal article supplement (https://springernature.figshare.com/ndownloader/files/17562821)

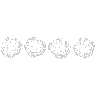

Supplement: Supplementary file 1 [file 17562821 › CytoscapeSession-2018_09_25-21_15/session_thumbnail.png]
